# Supplementary material for: Sponge genomes reveal a pre-metazoan origin of the sex determination toolkit and sex chromosomes
Source: Research Square preprint supplement (doi:10.21203/rs.3.rs-8554461/v1), 2026-02-12
Supplement: Supplementary file 1 [file 0c30f2029d82f3e62246e81a.xlsx]

## Sheet: Chren.difHeterozygosity.50000bp
chr	range	heterogametic	homogametic	ratio	ratio_scaled	diff	diff_scaled	start	end
OX359189.1	0	0.163667	0.166333	1.03625	1.0426	-0.00266667	0.0703353	0	50000
OX359189.1	1	0.262	0.201	1.37645	1.38488	0.061	-1.60892	50000	100000
OX359189.1	2	0.23	0.197667	1.27432	1.28213	0.0323333	-0.852815	100000	150000
OX359189.1	3	0.391333	0.469	0.784811	0.789619	-0.0776667	2.04851	150000	200000
OX359189.1	4	0.322667	0.279667	1.15399	1.16106	0.043	-1.13416	200000	250000
OX359189.1	5	0.224667	0.201333	1.14365	1.15065	0.0233333	-0.615434	250000	300000
OX359189.1	6	0.306	0.339	0.928715	0.934405	-0.033	0.870399	300000	350000
OX359189.1	7	0.255667	0.305	0.940049	0.945809	-0.0493333	1.3012	350000	400000
OX359189.1	8	0.212	0.294667	0.702227	0.706529	-0.0826667	2.18039	400000	450000
OX359189.1	9	0.252	0.280333	0.943153	0.948931	-0.0283333	0.747312	450000	500000
OX359189.1	10	0.254667	0.272667	0.974896	0.980868	-0.018	0.474763	500000	550000
OX359189.1	11	0.243	0.236667	1.11244	1.11925	0.00633333	-0.167046	550000	600000
OX359189.1	12	0.445667	0.427333	1.07643	1.08303	0.0183333	-0.483555	600000	650000
OX359189.1	13	0.374	0.301667	1.72693	1.73751	0.0723333	-1.90784	650000	700000
OX359189.1	14	0.296667	0.188667	1.66669	1.6769	0.108	-2.84858	700000	750000
OX359189.1	15	0.372667	0.391667	1.16118	1.16829	-0.019	0.501139	750000	800000
OX359189.1	16	0.309	0.390333	0.801179	0.806087	-0.0813333	2.14523	800000	850000
OX359189.1	17	0.267778	0.287778	0.826962	0.832028	-0.02	0.527515	850000	900000
OX359189.1	18	0.508	0.546	0.919882	0.925518	-0.038	1.00228	900000	950000
OX359189.1	19	0.388333	0.297333	2.23739	2.25109	0.091	-2.40019	950000	1000000
OX359189.1	20	0.198667	0.19	0.907674	0.913235	0.00866667	-0.22859	1000000	1050000
OX359189.1	21	0.298667	0.258333	1.15593	1.16301	0.0403333	-1.06382	1050000	1100000
OX359189.1	22	0.317333	0.294	1.05078	1.05722	0.0233333	-0.615434	1100000	1150000
OX359189.1	23	0.592667	0.542667	1.11327	1.12009	0.05	-1.31879	1150000	1200000
OX359189.1	24	0.644	0.827333	0.802323	0.807238	-0.183333	4.83555	1200000	1250000
OX359189.1	25	0.431	0.384333	1.17077	1.17794	0.0466667	-1.23087	1250000	1300000
OX359189.1	26	0.536667	0.564667	0.991991	0.998068	-0.028	0.73852	1300000	1350000
OX359189.1	27	0.291	0.288333	0.957302	0.963167	0.00266667	-0.0703353	1350000	1400000
OX359189.1	28	0.573	0.567667	1.02563	1.03192	0.00533333	-0.140671	1400000	1450000
OX359189.1	29	0.415333	0.464333	0.904891	0.910434	-0.049	1.29241	1450000	1500000
OX359189.1	30	0.413667	0.490333	0.85091	0.856123	-0.0766667	2.02214	1500000	1550000
OX359189.1	31	0.52	0.635333	0.807884	0.812834	-0.115333	3.042	1550000	1600000
OX359189.1	32	0.605667	0.669333	0.986977	0.993024	-0.0636667	1.67925	1600000	1650000
OX359189.1	33	0.902333	0.836667	1.10227	1.10902	0.0656667	-1.73201	1650000	1700000
OX359189.1	34	0.488	0.373667	1.35139	1.35967	0.114333	-3.01562	1700000	1750000
OX359189.1	35	0.141	0.150333	0.840553	0.845703	-0.00933333	0.246173	1750000	1800000
OX359189.1	36	0.314667	0.394333	0.787293	0.792116	-0.0796667	2.10127	1800000	1850000
OX359189.1	37	0.392333	0.530333	0.772946	0.777681	-0.138	3.63985	1850000	1900000
OX359189.1	38	0.383667	0.433	0.911415	0.916999	-0.0493333	1.3012	1900000	1950000
OX359189.1	39	0.63	0.624	1.03375	1.04008	0.006	-0.158254	1950000	2000000
OX359189.1	40	0.582333	0.671	0.870337	0.875669	-0.0886667	2.33865	2000000	2050000
OX359189.1	41	0.618333	0.800333	0.745532	0.7501	-0.182	4.80038	2050000	2100000
OX359189.1	42	0.362	0.576	0.637763	0.64167	-0.214	5.64441	2100000	2150000
OX359189.1	43	0.525667	0.641	0.802206	0.80712	-0.115333	3.042	2150000	2200000
OX359189.1	44	0.310667	0.457667	0.6534	0.657403	-0.147	3.87723	2200000	2250000
OX359189.1	45	0.634	0.660333	0.978913	0.98491	-0.0263333	0.694561	2250000	2300000
OX359189.1	46	0.738	0.789333	0.941141	0.946906	-0.0513333	1.35395	2300000	2350000
OX359189.1	47	0.543	0.635333	0.859625	0.864891	-0.0923333	2.43536	2350000	2400000
OX359189.1	48	0.280333	0.344333	0.863955	0.869248	-0.064	1.68805	2400000	2450000
OX359189.1	49	0.449667	0.476	1.07228	1.07885	-0.0263333	0.694561	2450000	2500000
OX359189.1	50	0.489333	0.415333	1.24796	1.2556	0.074	-1.9518	2500000	2550000
OX359189.1	51	0.688	0.724	1.00938	1.01556	-0.036	0.949526	2550000	2600000
OX359189.1	52	0.439	0.536	0.830624	0.835713	-0.097	2.55845	2600000	2650000
OX359189.1	53	0.341333	0.466667	0.737869	0.74239	-0.125333	3.30576	2650000	2700000
OX359189.1	54	0.587667	0.592333	1.00468	1.01083	-0.00466667	0.123087	2700000	2750000
OX359189.1	55	0.422333	0.46	0.967604	0.973532	-0.0376667	0.993486	2750000	2800000
OX359189.1	56	0.432667	0.304333	1.73508	1.74571	0.128333	-3.38489	2800000	2850000
OX359189.1	57	0.454	0.49	0.959202	0.965079	-0.036	0.949526	2850000	2900000
OX359189.1	58	0.292	0.417	0.74983	0.754423	-0.125	3.29697	2900000	2950000
OX359189.1	59	0.349667	0.252333	1.32311	1.33121	0.0973333	-2.56724	2950000	3000000
OX359189.1	60	0.562	0.533	1.21089	1.21831	0.029	-0.764896	3000000	3050000
OX359189.1	61	0.498667	0.502333	1.03318	1.03951	-0.00366667	0.096711	3050000	3100000
OX359189.1	62	0.320667	0.280667	1.35061	1.35888	0.04	-1.05503	3100000	3150000
OX359189.1	63	0.498667	0.442667	1.13608	1.14304	0.056	-1.47704	3150000	3200000
OX359189.1	64	0.32	0.347	0.961782	0.967675	-0.027	0.712145	3200000	3250000
OX359189.1	65	0.312	0.335	0.933865	0.939586	-0.023	0.606642	3250000	3300000
OX359189.1	66	0.231333	0.264	0.948108	0.953917	-0.0326667	0.861607	3300000	3350000
OX359189.1	67	0.153333	0.238667	0.650166	0.654149	-0.0853333	2.25073	3350000	3400000
OX359189.1	68	0.195667	0.301667	0.624727	0.628555	-0.106	2.79583	3400000	3450000
OX359189.1	69	0.313	0.327	1.05484	1.06131	-0.014	0.36926	3450000	3500000
OX359189.1	70	0.246333	0.428	0.57481	0.578331	-0.181667	4.79159	3500000	3550000
OX359189.1	71	0.214333	0.285	0.918085	0.92371	-0.0706667	1.86388	3550000	3600000
OX359189.1	72	0.231667	0.273	0.844229	0.849401	-0.0413333	1.0902	3600000	3650000
OX359189.1	73	0.251667	0.212333	1.28218	1.29003	0.0393333	-1.03745	3650000	3700000
OX359189.1	74	0.349	0.312333	1.1665	1.17365	0.0366667	-0.96711	3700000	3750000
OX359189.1	75	0.143	0.221667	0.630164	0.634025	-0.0786667	2.07489	3750000	3800000
OX359189.1	76	0.123	0.198667	0.591582	0.595207	-0.0756667	1.99576	3800000	3850000
OX359189.1	77	0.177667	0.225667	0.73269	0.737179	-0.048	1.26603	3850000	3900000
OX359189.1	78	0.167333	0.249667	0.589007	0.592616	-0.0823333	2.1716	3900000	3950000
OX359189.1	79	0.2	0.304667	0.64393	0.647875	-0.104667	2.76066	3950000	4000000
OX359189.1	80	0.407333	0.468	0.88648	0.891911	-0.0606667	1.60013	4000000	4050000
OX359189.1	81	0.310667	0.299	1.11868	1.12553	0.0116667	-0.307717	4050000	4100000
OX359189.1	82	0.258333	0.284	0.933299	0.939017	-0.0256667	0.676977	4100000	4150000
OX359189.1	83	0.223333	0.261	0.843262	0.848428	-0.0376667	0.993486	4150000	4200000
OX359189.1	84	0.179	0.221	0.794624	0.799493	-0.042	1.10778	4200000	4250000
OX359189.1	85	0.339583	0.387917	0.843248	0.848414	-0.0483333	1.27483	4250000	4290000
OX359189.1	86	0.0985185	0.141111	0.712254	0.716617	-0.0425926	1.12341	4305000	4350000
OX359189.1	87	0.355667	0.429333	0.823794	0.828841	-0.0736667	1.94301	4350000	4400000
OX359189.1	88	0.344333	0.413	0.821384	0.826416	-0.0686667	1.81113	4400000	4450000
OX359189.1	89	0.232333	0.291	0.743988	0.748546	-0.0586667	1.54738	4450000	4500000
OX359189.1	90	0.176667	0.334667	0.530831	0.534083	-0.158	4.16736	4500000	4550000
OX359189.1	91	0.213667	0.384667	0.588332	0.591936	-0.171	4.51025	4550000	4600000
OX359189.1	92	0.182333	0.273667	0.677409	0.681559	-0.0913333	2.40898	4600000	4650000
OX359189.1	93	0.150333	0.256	0.580311	0.583866	-0.105667	2.78704	4650000	4700000
OX359189.1	94	0.168	0.200333	0.797135	0.802019	-0.0323333	0.852815	4700000	4750000
OX359189.1	95	0.288	0.266333	1.13619	1.14315	0.0216667	-0.571474	4750000	4800000
OX359189.1	96	0.504333	0.540667	0.907389	0.912948	-0.0363333	0.958318	4800000	4850000
OX359189.1	97	0.570333	0.496	1.10052	1.10726	0.0743333	-1.9606	4850000	4900000
OX359189.1	98	0.379667	0.421	0.880175	0.885567	-0.0413333	1.0902	4900000	4950000
OX359189.1	99	0.408	0.411333	0.94513	0.950921	-0.00333333	0.0879191	4950000	5000000
OX359189.1	100	0.313	0.356333	0.887954	0.893394	-0.0433333	1.14295	5000000	5050000
OX359189.1	101	0.500667	0.462333	1.01054	1.01673	0.0383333	-1.01107	5050000	5100000
OX359189.1	102	0.426	0.447333	0.933079	0.938796	-0.0213333	0.562682	5100000	5150000
OX359189.1	103	0.301667	0.341333	0.859711	0.864978	-0.0396667	1.04624	5150000	5200000
OX359189.1	104	0.407	0.558667	0.736733	0.741247	-0.151667	4.00032	5200000	5250000
OX359189.1	105	0.422667	0.449667	0.932711	0.938425	-0.027	0.712145	5250000	5300000
OX359189.1	106	0.401333	0.435	0.943158	0.948936	-0.0336667	0.887983	5300000	5350000
OX359189.1	107	0.410667	0.470667	0.913388	0.918983	-0.06	1.58254	5350000	5400000
OX359189.1	108	0.506333	0.382667	1.28049	1.28833	0.123667	-3.2618	5400000	5450000
OX359189.1	109	0.252	0.280667	0.848243	0.85344	-0.0286667	0.756104	5450000	5500000
OX359189.1	110	0.260333	0.291667	0.848504	0.853703	-0.0313333	0.826439	5500000	5550000
OX359189.1	111	0.278	0.264333	1.03362	1.03995	0.0136667	-0.360468	5550000	5600000
OX359189.1	112	0.343	0.394333	0.878303	0.883684	-0.0513333	1.35395	5600000	5650000
OX359189.1	113	0.400333	0.367667	1.10074	1.10749	0.0326667	-0.861607	5650000	5700000
OX359189.1	114	0.556333	0.546	1.21017	1.21758	0.0103333	-0.272549	5700000	5750000
OX359189.1	115	0.475333	0.595333	0.834929	0.840044	-0.12	3.16509	5750000	5800000
OX359189.1	116	0.513333	0.509	1.19671	1.20404	0.00433333	-0.114295	5800000	5850000
OX359189.1	117	0.420333	0.489333	0.817546	0.822555	-0.069	1.81993	5850000	5900000
OX359189.1	118	0.441333	0.589	0.685944	0.690146	-0.147667	3.89482	5900000	5950000
OX359189.1	119	0.656333	0.685667	1.02911	1.03541	-0.0293333	0.773688	5950000	6000000
OX359189.1	120	0.805333	0.929667	0.868035	0.873353	-0.124333	3.27938	6000000	6050000
OX359189.1	121	0.516	0.621333	0.835319	0.840436	-0.105333	2.77824	6050000	6100000
OX359189.1	122	0.516667	0.662	0.816334	0.821335	-0.145333	3.83327	6100000	6150000
OX359189.1	123	0.354	0.448	0.781794	0.786583	-0.094	2.47932	6150000	6200000
OX359189.1	124	0.616667	0.658333	0.926961	0.93264	-0.0416667	1.09899	6200000	6250000
OX359189.1	125	0.329667	0.486333	0.680162	0.684329	-0.156667	4.1322	6250000	6300000
OX359189.1	126	0.626667	0.659	0.981151	0.987162	-0.0323333	0.852815	6300000	6350000
OX359189.1	127	0.529	0.661667	0.708271	0.712611	-0.132667	3.49918	6350000	6400000
OX359189.1	128	0.179	0.320333	0.555319	0.558721	-0.141333	3.72777	6400000	6450000
OX359189.1	129	0.094	0.101667	0.970967	0.976916	-0.00766667	0.202214	6450000	6500000
OX359189.1	130	0.146667	0.138667	1.08471	1.09136	0.008	-0.211006	6500000	6550000
OX359189.1	131	0.234333	0.318333	0.774991	0.779739	-0.084	2.21556	6550000	6600000
OX359189.1	132	0.590333	0.563	1.13087	1.1378	0.0273333	-0.720937	6600000	6650000
OX359189.1	133	0.512333	0.481667	1.14407	1.15108	0.0306667	-0.808856	6650000	6700000
OX359189.1	134	0.569667	0.747667	0.772571	0.777304	-0.178	4.69488	6700000	6750000
OX359189.1	135	0.594	0.674667	0.952242	0.958076	-0.0806667	2.12764	6750000	6800000
OX359189.1	136	0.412667	0.557667	3.45402	3.47518	-0.145	3.82448	6800000	6850000
OX359189.1	137	0.804667	0.760667	1.09203	1.09872	0.044	-1.16053	6850000	6900000
OX359189.1	138	0.426667	0.623667	0.70984	0.714189	-0.197	5.19602	6900000	6950000
OX359189.1	139	0.382333	0.611667	0.627226	0.631069	-0.229333	6.04883	6950000	7000000
OX359189.1	140	0.355	0.427333	0.997426	1.00354	-0.0723333	1.90784	7000000	7050000
OX359189.1	141	0.15963	0.175185	0.641512	0.645443	-0.0155556	0.410289	7050000	7100000
OX359189.1	142	0.545	0.536667	0.987907	0.99396	0.00833333	-0.219798	7100000	7150000
OX359189.1	143	0.342333	0.27	1.36625	1.37462	0.0723333	-1.90784	7150000	7200000
OX359189.1	144	0.276667	0.350333	0.627046	0.630887	-0.0736667	1.94301	7200000	7250000
OX359189.1	145	0.275333	0.372333	0.836066	0.841188	-0.097	2.55845	7250000	7300000
OX359189.1	146	0.338	0.373667	0.871731	0.877072	-0.0356667	0.940734	7300000	7350000
OX359189.1	147	0.547667	0.432	1.24739	1.25503	0.115667	-3.05079	7350000	7400000
OX359189.1	148	0.460333	0.582667	0.801272	0.806181	-0.122333	3.22663	7400000	7450000
OX359189.1	149	0.384333	0.411	0.950559	0.956383	-0.0266667	0.703353	7450000	7500000
OX359189.1	150	0.345	0.391667	0.821895	0.82693	-0.0466667	1.23087	7500000	7550000
OX359189.1	151	0.577333	0.687	0.83426	0.839371	-0.109667	2.89254	7550000	7600000
OX359189.1	152	0.331667	0.443	0.808825	0.81378	-0.111333	2.9365	7600000	7650000
OX359189.1	153	0.243333	0.333333	0.741747	0.746291	-0.09	2.37382	7650000	7700000
OX359189.1	154	0.570667	0.729667	0.813078	0.818059	-0.159	4.19374	7700000	7750000
OX359189.1	155	0.227333	0.336	0.478543	0.481475	-0.108667	2.86616	7750000	7800000
OX359189.1	156	0.251667	0.326	0.741813	0.746358	-0.0743333	1.9606	7800000	7850000
OX359189.1	157	0.147407	0.191111	0.865705	0.871008	-0.0437037	1.15272	7850000	7900000
OX359189.1	158	0.411	0.54	0.777524	0.782287	-0.129	3.40247	7900000	7950000
OX359189.1	159	0.356333	0.374333	1.04691	1.05333	-0.018	0.474763	7950000	8000000
OX359189.1	160	0.377	0.365667	1.28748	1.29537	0.0113333	-0.298925	8000000	8050000
OX359189.1	161	0.547667	0.691667	0.797966	0.802854	-0.144	3.7981	8050000	8100000
OX359189.1	162	0.415667	0.539667	0.798632	0.803525	-0.124	3.27059	8100000	8150000
OX359189.1	163	0.525	0.551	0.949054	0.954868	-0.026	0.685769	8150000	8200000
OX359189.1	164	0.326	0.410333	0.731114	0.735593	-0.0843333	2.22435	8200000	8250000
OX359189.1	165	0.484	0.514333	1.008	1.01418	-0.0303333	0.800064	8250000	8300000
OX359189.1	166	0.382333	0.403333	1.04268	1.04906	-0.021	0.55389	8300000	8350000
OX359189.1	167	0.230333	0.385667	0.615747	0.619519	-0.155333	4.09703	8350000	8400000
OX359189.1	168	0.568667	0.671333	0.839756	0.8449	-0.102667	2.70791	8400000	8450000
OX359189.1	169	0.592667	0.794667	0.754021	0.75864	-0.202	5.3279	8450000	8500000
OX359189.1	170	0.462	0.343333	1.45883	1.46777	0.118667	-3.12992	8500000	8550000
OX359189.1	171	0.509667	0.470667	1.12133	1.1282	0.039	-1.02865	8550000	8600000
OX359189.1	172	0.366667	0.403333	0.822952	0.827994	-0.0366667	0.96711	8600000	8650000
OX359189.1	173	0.572333	0.592	0.995113	1.00121	-0.0196667	0.518723	8650000	8700000
OX359189.1	174	0.486	0.422333	1.21112	1.21854	0.0636667	-1.67925	8700000	8750000
OX359189.1	175	0.622667	0.698667	0.919599	0.925233	-0.076	2.00456	8750000	8800000
OX359189.1	176	0.522333	0.589	0.930816	0.936519	-0.0666667	1.75838	8800000	8850000
OX359189.1	177	0.661	0.867667	0.770631	0.775352	-0.206667	5.45098	8850000	8900000
OX359189.1	178	0.249667	0.303	0.733681	0.738176	-0.0533333	1.40671	8900000	8950000
OX359189.1	179	0.843667	0.735333	1.16496	1.17209	0.108333	-2.85737	8950000	9000000
OX359189.1	180	0.387	0.422	0.795614	0.800488	-0.035	0.92315	9000000	9050000
OX359189.1	181	0.328	0.421333	0.772981	0.777717	-0.0933333	2.46173	9050000	9100000
OX359189.1	182	0.534	0.587333	0.901407	0.906929	-0.0533333	1.40671	9100000	9150000
OX359189.1	183	0.634	0.615	1.01908	1.02533	0.019	-0.501139	9150000	9200000
OX359189.1	184	0.412333	0.472	0.884771	0.890191	-0.0596667	1.57375	9200000	9250000
OX359189.1	185	0.429	0.547333	0.814846	0.819838	-0.118333	3.12113	9250000	9300000
OX359189.1	186	0.478	0.585667	0.791994	0.796846	-0.107667	2.83979	9300000	9350000
OX359189.1	187	0.532667	0.770667	0.672061	0.676178	-0.238	6.27742	9350000	9400000
OX359189.1	188	0.539	0.715667	0.768652	0.773361	-0.176667	4.65971	9400000	9450000
OX359189.1	189	0.397333	0.471333	0.8701	0.87543	-0.074	1.9518	9450000	9500000
OX359189.1	190	0.397667	0.576	0.596416	0.600069	-0.178333	4.70367	9500000	9550000
OX359189.1	191	0.377333	0.458667	0.882723	0.888131	-0.0813333	2.14523	9550000	9600000
OX359189.1	192	0.594667	0.599333	0.992247	0.998326	-0.00466667	0.123087	9600000	9650000
OX359189.1	193	0.390667	0.473	0.834975	0.84009	-0.0823333	2.1716	9650000	9700000
OX359189.1	194	0.411	0.483	0.814822	0.819814	-0.072	1.89905	9700000	9750000
OX359189.1	195	0.314333	0.371	0.772024	0.776754	-0.0566667	1.49462	9750000	9800000
OX359189.1	196	0.307	0.426333	0.795973	0.80085	-0.119333	3.1475	9800000	9850000
OX359189.1	197	0.449333	0.537333	1.00317	1.00932	-0.088	2.32106	9850000	9900000
OX359189.1	198	0.437	0.457333	0.998115	1.00423	-0.0203333	0.536306	9900000	9950000
OX359189.1	199	0.345667	0.363667	1.13665	1.14362	-0.018	0.474763	9950000	10000000
OX359189.1	200	0.435333	0.465	1.01042	1.01661	-0.0296667	0.78248	10000000	10050000
OX359189.1	201	0.5675	0.564583	1.00296	1.0091	0.00291667	-0.0769292	10050000	10100000
OX359189.1	202	0.398333	0.555417	0.683254	0.68744	-0.157083	4.14319	10100000	10150000
OX359189.1	203	0.222333	0.384667	0.619024	0.622817	-0.162333	4.28166	10150000	10200000
OX359189.1	204	0.583333	0.647	0.875007	0.880368	-0.0636667	1.67925	10200000	10250000
OX359189.1	205	0.604333	0.691	0.875499	0.880863	-0.0866667	2.2859	10250000	10300000
OX359189.1	206	0.248333	0.292	0.835353	0.840471	-0.0436667	1.15174	10300000	10350000
OX359189.1	207	0.329	0.343333	1.05648	1.06295	-0.0143333	0.378052	10350000	10400000
OX359189.1	208	0.0466667	0.0966667	0.595	0.598645	-0.05	1.31879	10400000	10410000
OX359190.1	0	0.174667	0.335333	0.546772	0.550121	-0.160667	4.2377	0	50000
OX359190.1	1	0.282333	0.345333	0.859079	0.864342	-0.063	1.66167	50000	100000
OX359190.1	2	0.259	0.327333	0.746472	0.751045	-0.0683333	1.80234	100000	150000
OX359190.1	3	0.362333	0.431	0.841598	0.846754	-0.0686667	1.81113	150000	200000
OX359190.1	4	0.361	0.454667	0.761649	0.766316	-0.0936667	2.47053	200000	250000
OX359190.1	5	0.255	0.382667	0.676561	0.680706	-0.127667	3.3673	250000	300000
OX359190.1	6	0.235667	0.31	0.729221	0.733689	-0.0743333	1.9606	300000	350000
OX359190.1	7	0.268	0.423	0.672259	0.676378	-0.155	4.08824	350000	400000
OX359190.1	8	0.497	0.541	0.90921	0.91478	-0.044	1.16053	400000	450000
OX359190.1	9	0.336333	0.462	0.710915	0.715271	-0.125667	3.31455	450000	500000
OX359190.1	10	0.121667	0.191667	0.680607	0.684777	-0.07	1.8463	500000	550000
OX359190.1	11	0.189333	0.298333	0.537199	0.54049	-0.109	2.87495	550000	600000
OX359190.1	12	0.400333	0.616667	0.621346	0.625152	-0.216333	5.70595	600000	650000
OX359190.1	13	0.364667	0.493667	0.798589	0.803481	-0.129	3.40247	650000	700000
OX359190.1	14	0.411	0.576	0.739851	0.744384	-0.165	4.352	700000	750000
OX359190.1	15	0.409333	0.594667	0.689713	0.693938	-0.185333	4.8883	750000	800000
OX359190.1	16	0.478667	0.638333	0.749959	0.754554	-0.159667	4.21132	800000	850000
OX359190.1	17	0.358	0.466667	0.760874	0.765536	-0.108667	2.86616	850000	900000
OX359190.1	18	0.338	0.393333	0.851106	0.85632	-0.0553333	1.45946	900000	950000
OX359190.1	19	0.315	0.391	0.811745	0.816718	-0.076	2.00456	950000	1000000
OX359190.1	20	0.431	0.503	0.879099	0.884484	-0.072	1.89905	1000000	1050000
OX359190.1	21	0.291667	0.415333	0.693455	0.697703	-0.123667	3.2618	1050000	1100000
OX359190.1	22	0.375667	0.511333	0.729268	0.733736	-0.135667	3.57831	1100000	1150000
OX359190.1	23	0.233333	0.297333	0.768828	0.773538	-0.064	1.68805	1150000	1200000
OX359190.1	24	0.503667	0.583333	0.847874	0.853068	-0.0796667	2.10127	1200000	1250000
OX359190.1	25	0.224667	0.293333	0.770292	0.775011	-0.0686667	1.81113	1250000	1300000
OX359190.1	26	0.201	0.312	0.662625	0.666684	-0.111	2.92771	1300000	1350000
OX359190.1	27	0.234333	0.375	0.60605	0.609763	-0.140667	3.71019	1350000	1400000
OX359190.1	28	0.216	0.332	0.673694	0.677821	-0.116	3.05958	1400000	1450000
OX359190.1	29	0.223333	0.368667	0.590963	0.594583	-0.145333	3.83327	1450000	1500000
OX359190.1	30	0.444	0.501333	0.94611	0.951907	-0.0573333	1.51221	1500000	1550000
OX359190.1	31	0.268333	0.287333	0.973336	0.979299	-0.019	0.501139	1550000	1600000
OX359190.1	32	0.133333	0.163704	0.710253	0.714604	-0.0303704	0.801041	1600000	1650000
OX359190.1	33	0.506333	0.54	0.980648	0.986656	-0.0336667	0.887983	1650000	1700000
OX359190.1	34	0.408333	0.466667	0.900298	0.905813	-0.0583333	1.53858	1700000	1750000
OX359190.1	35	0.549333	0.599667	0.931026	0.93673	-0.0503333	1.32758	1750000	1800000
OX359190.1	36	0.480667	0.671	0.774065	0.778807	-0.190333	5.02018	1800000	1850000
OX359190.1	37	0.433333	0.471333	0.93635	0.942087	-0.038	1.00228	1850000	1900000
OX359190.1	38	0.432667	0.49	0.899006	0.904514	-0.0573333	1.51221	1900000	1950000
OX359190.1	39	0.318333	0.329667	0.923768	0.929428	-0.0113333	0.298925	1950000	2000000
OX359190.1	40	0.358333	0.446	0.831773	0.836869	-0.0876667	2.31227	2000000	2050000
OX359190.1	41	0.470333	0.554667	0.880113	0.885504	-0.0843333	2.22435	2050000	2100000
OX359190.1	42	0.341	0.372	0.871688	0.877029	-0.031	0.817648	2100000	2150000
OX359190.1	43	0.406	0.44	0.927999	0.933685	-0.034	0.896775	2150000	2200000
OX359190.1	44	0.420833	0.36375	1.11349	1.12032	0.0570833	-1.50561	2200000	2250000
OX359190.1	45	0.317667	0.365333	0.921816	0.927463	-0.0476667	1.25724	2250000	2300000
OX359190.1	46	0.196333	0.260667	0.602759	0.606452	-0.0643333	1.69684	2300000	2350000
OX359190.1	47	0.294667	0.276	1.16034	1.16744	0.0186667	-0.492347	2350000	2400000
OX359190.1	48	0.281667	0.452333	0.738086	0.742608	-0.170667	4.50146	2400000	2450000
OX359190.1	49	0.376	0.531333	0.715963	0.720349	-0.155333	4.09703	2450000	2500000
OX359190.1	50	0.277333	0.385667	0.732763	0.737252	-0.108333	2.85737	2500000	2550000
OX359190.1	51	0.294	0.351	0.85597	0.861214	-0.057	1.50342	2550000	2600000
OX359190.1	52	0.313333	0.525667	0.561177	0.564615	-0.212333	5.60045	2600000	2650000
OX359190.1	53	0.282	0.376	0.811863	0.816837	-0.094	2.47932	2650000	2700000
OX359190.1	54	0.454	0.603333	0.767578	0.772281	-0.149333	3.93878	2700000	2750000
OX359190.1	55	0.565667	0.649667	0.880141	0.885533	-0.084	2.21556	2750000	2800000
OX359190.1	56	0.604667	0.586667	1.04269	1.04908	0.018	-0.474763	2800000	2850000
OX359190.1	57	0.592667	0.575333	1.04853	1.05495	0.0173333	-0.457179	2850000	2900000
OX359190.1	58	0.550333	0.480333	1.19203	1.19934	0.07	-1.8463	2900000	2950000
OX359190.1	59	0.558333	0.542667	1.06923	1.07578	0.0156667	-0.41322	2950000	3000000
OX359190.1	60	0.625667	0.646333	0.995699	1.0018	-0.0206667	0.545098	3000000	3050000
OX359190.1	61	0.630333	0.682333	0.920625	0.926265	-0.052	1.37154	3050000	3100000
OX359190.1	62	0.431	0.481667	0.929114	0.934806	-0.0506667	1.33637	3100000	3150000
OX359190.1	63	0.514	0.58	0.885451	0.890876	-0.066	1.7408	3150000	3200000
OX359190.1	64	0.200667	0.188667	1.32915	1.33729	0.012	-0.316509	3200000	3250000
OX359190.1	65	0.113667	0.127667	0.699599	0.703885	-0.014	0.36926	3250000	3300000
OX359190.1	66	0.149333	0.187	0.877189	0.882563	-0.0376667	0.993486	3300000	3350000
OX359190.1	67	0.312667	0.347	1.01161	1.01781	-0.0343333	0.905567	3350000	3400000
OX359190.1	68	0.562333	0.555	1.07686	1.08345	0.00733333	-0.193422	3400000	3450000
OX359190.1	69	0.493333	0.423	1.15401	1.16108	0.0703333	-1.85509	3450000	3500000
OX359190.1	70	0.686	0.483	1.50622	1.51545	0.203	-5.35427	3500000	3550000
OX359190.1	71	0.425667	0.497667	0.900607	0.906124	-0.072	1.89905	3550000	3600000
OX359190.1	72	0.28	0.324333	0.861579	0.866858	-0.0443333	1.16932	3600000	3650000
OX359190.1	73	0.444	0.403667	1.0343	1.04063	0.0403333	-1.06382	3650000	3700000
OX359190.1	74	0.395667	0.422333	0.937126	0.942867	-0.0266667	0.703353	3700000	3750000
OX359190.1	75	0.216333	0.293667	0.747715	0.752296	-0.0773333	2.03972	3750000	3800000
OX359190.1	76	0.358333	0.536	0.680545	0.684714	-0.177667	4.68609	3800000	3850000
OX359190.1	77	0.300333	0.374667	0.909405	0.914976	-0.0743333	1.9606	3850000	3900000
OX359190.1	78	0.218	0.240667	0.938221	0.943969	-0.0226667	0.59785	3900000	3950000
OX359190.1	79	0.420667	0.411667	1.03128	1.0376	0.009	-0.237382	3950000	4000000
OX359190.1	80	0.350667	0.347333	1.03042	1.03673	0.00333333	-0.0879191	4000000	4050000
OX359190.1	81	0.351	0.325333	1.18915	1.19644	0.0256667	-0.676977	4050000	4100000
OX359190.1	82	0.349667	0.325667	1.41767	1.42635	0.024	-0.633017	4100000	4150000
OX359190.1	83	0.558667	0.472	1.39934	1.40791	0.0866667	-2.2859	4150000	4200000
OX359190.1	84	0.335	0.319	1.1222	1.12908	0.016	-0.422012	4200000	4250000
OX359190.1	85	0.26	0.290333	1.13308	1.14002	-0.0303333	0.800064	4250000	4300000
OX359190.1	86	0.299667	0.239333	1.74179	1.75246	0.0603333	-1.59134	4300000	4350000
OX359190.1	87	0.329	0.292667	1.41031	1.41895	0.0363333	-0.958318	4350000	4400000
OX359190.1	88	0.400667	0.380333	1.12284	1.12972	0.0203333	-0.536306	4400000	4450000
OX359190.1	89	0.465333	0.397667	1.25307	1.26075	0.0676667	-1.78476	4450000	4500000
OX359190.1	90	0.426667	0.311	1.43097	1.43974	0.115667	-3.05079	4500000	4550000
OX359190.1	91	0.251	0.268	0.911584	0.917169	-0.017	0.448387	4550000	4600000
OX359190.1	92	0.257	0.243333	1.10032	1.10706	0.0136667	-0.360468	4600000	4650000
OX359190.1	93	0.325667	0.273667	1.38485	1.39333	0.052	-1.37154	4650000	4700000
OX359190.1	94	0.406333	0.329667	1.48088	1.48996	0.0766667	-2.02214	4700000	4750000
OX359190.1	95	0.488667	0.556667	0.999285	1.00541	-0.068	1.79355	4750000	4800000
OX359190.1	96	0.428	0.485667	0.841519	0.846674	-0.0576667	1.521	4800000	4850000
OX359190.1	97	0.311333	0.184667	2.3532	2.36761	0.126667	-3.34093	4850000	4900000
OX359190.1	98	0.251667	0.235333	1.10979	1.11658	0.0163333	-0.430804	4900000	4950000
OX359190.1	99	0.190333	0.180667	1.15559	1.16267	0.00966667	-0.254965	4950000	5000000
OX359190.1	100	0.572333	0.591333	1.16726	1.17441	-0.019	0.501139	5000000	5050000
OX359190.1	101	0.502333	0.552333	0.927433	0.933115	-0.05	1.31879	5050000	5100000
OX359190.1	102	0.264	0.293	0.907215	0.912773	-0.029	0.764896	5100000	5150000
OX359190.1	103	0.183	0.223	0.943332	0.949111	-0.04	1.05503	5150000	5200000
OX359190.1	104	0.168333	0.226667	0.735379	0.739884	-0.0583333	1.53858	5200000	5250000
OX359190.1	105	0.160333	0.219	0.719656	0.724065	-0.0586667	1.54738	5250000	5300000
OX359190.1	106	0.313667	0.356	0.829697	0.83478	-0.0423333	1.11657	5300000	5350000
OX359190.1	107	0.408667	0.429	0.938584	0.944334	-0.0203333	0.536306	5350000	5400000
OX359190.1	108	0.404667	0.445667	0.918592	0.92422	-0.041	1.0814	5400000	5450000
OX359190.1	109	0.179333	0.195333	0.907792	0.913353	-0.016	0.422012	5450000	5500000
OX359190.1	110	0.201	0.211	0.945363	0.951154	-0.01	0.263757	5500000	5550000
OX359190.1	111	0.273667	0.308333	0.843244	0.84841	-0.0346667	0.914359	5550000	5600000
OX359190.1	112	0.173	0.177667	0.950378	0.956201	-0.00466667	0.123087	5600000	5650000
OX359190.1	113	0.232	0.268667	0.884807	0.890227	-0.0366667	0.96711	5650000	5700000
OX359190.1	114	0.08	0.146333	0.522095	0.525293	-0.0663333	1.74959	5700000	5750000
OX359190.1	115	0.316667	0.326	0.927316	0.932997	-0.00933333	0.246173	5750000	5800000
OX359190.1	116	0.308667	0.350667	0.919561	0.925195	-0.042	1.10778	5800000	5850000
OX359190.1	117	0.357	0.439667	0.821325	0.826357	-0.0826667	2.18039	5850000	5900000
OX359190.1	118	0.175333	0.215	0.830509	0.835597	-0.0396667	1.04624	5900000	5950000
OX359190.1	119	0.148333	0.218	0.660859	0.664907	-0.0696667	1.83751	5950000	6000000
OX359190.1	120	0.274333	0.363333	0.771051	0.775774	-0.089	2.34744	6000000	6050000
OX359190.1	121	0.276667	0.377	0.712763	0.717129	-0.100333	2.64636	6050000	6100000
OX359190.1	122	0.170667	0.244333	0.734713	0.739214	-0.0736667	1.94301	6100000	6150000
OX359190.1	123	0.188	0.217	0.732751	0.73724	-0.029	0.764896	6150000	6200000
OX359190.1	124	0.225667	0.174667	1.32137	1.32947	0.051	-1.34516	6200000	6250000
OX359190.1	125	0.466667	0.257	2.59867	2.61459	0.209667	-5.53011	6250000	6300000
OX359190.1	126	0.417	0.319	1.48226	1.49134	0.098	-2.58482	6300000	6350000
OX359190.1	127	0.634	0.469	1.39006	1.39857	0.165	-4.352	6350000	6400000
OX359190.1	128	0.349	0.259667	1.41031	1.41895	0.0893333	-2.35623	6400000	6450000
OX359190.1	129	0.290333	0.215	1.40309	1.41168	0.0753333	-1.98697	6450000	6500000
OX359190.1	130	0.630333	0.567333	1.37112	1.37952	0.063	-1.66167	6500000	6550000
OX359190.1	131	0.339	0.247333	1.52193	1.53126	0.0916667	-2.41778	6550000	6600000
OX359190.1	132	0.352333	0.296	1.25611	1.2638	0.0563333	-1.48583	6600000	6650000
OX359190.1	133	0.344667	0.224	1.63707	1.6471	0.120667	-3.18267	6650000	6700000
OX359190.1	134	0.348	0.284333	1.25595	1.26365	0.0636667	-1.67925	6700000	6750000
OX359190.1	135	0.252667	0.206333	1.25876	1.26647	0.0463333	-1.22208	6750000	6800000
OX359190.1	136	0.231	0.152667	1.71733	1.72785	0.0783333	-2.0661	6800000	6850000
OX359190.1	137	0.291333	0.187667	1.75222	1.76295	0.103667	-2.73428	6850000	6900000
OX359190.1	138	0.527333	0.312333	1.93817	1.95004	0.215	-5.67078	6900000	6950000
OX359190.1	139	0.396	0.315	1.27024	1.27802	0.081	-2.13643	6950000	7000000
OX359190.1	140	0.490667	0.400333	1.22115	1.22863	0.0903333	-2.38261	7000000	7050000
OX359190.1	141	0.377	0.468333	0.804971	0.809902	-0.0913333	2.40898	7050000	7100000
OX359190.1	142	0.470667	0.530667	0.914093	0.919693	-0.06	1.58254	7100000	7150000
OX359190.1	143	0.350667	0.314	1.25083	1.25849	0.0366667	-0.96711	7150000	7200000
OX359190.1	144	0.366667	0.345333	1.09557	1.10229	0.0213333	-0.562682	7200000	7250000
OX359190.1	145	0.277	0.293667	1.25103	1.25869	-0.0166667	0.439595	7250000	7300000
OX359190.1	146	0.342667	0.371333	0.911894	0.917481	-0.0286667	0.756104	7300000	7350000
OX359190.1	147	0.387	0.469	0.887124	0.892559	-0.082	2.16281	7350000	7400000
OX359190.1	148	0.301	0.284667	1.11354	1.12036	0.0163333	-0.430804	7400000	7450000
OX359190.1	149	0.400667	0.392	1.16508	1.17222	0.00866667	-0.22859	7450000	7500000
OX359190.1	150	0.448667	0.431667	0.928869	0.934559	0.017	-0.448387	7500000	7550000
OX359190.1	151	0.294333	0.308667	0.941848	0.947618	-0.0143333	0.378052	7550000	7600000
OX359190.1	152	0.467667	0.459	1.04845	1.05487	0.00866667	-0.22859	7600000	7650000
OX359190.1	153	0.273	0.381333	0.683743	0.687932	-0.108333	2.85737	7650000	7700000
OX359190.1	154	0.154667	0.262667	0.629535	0.633392	-0.108	2.84858	7700000	7750000
OX359190.1	155	0.285333	0.403333	0.668325	0.67242	-0.118	3.11234	7750000	7800000
OX359190.1	156	0.242333	0.307	0.770199	0.774917	-0.0646667	1.70563	7800000	7850000
OX359190.1	157	0.210333	0.245667	0.89039	0.895845	-0.0353333	0.931942	7850000	7900000
OX359190.1	158	0.153	0.266	0.563536	0.566989	-0.113	2.98046	7900000	7950000
OX359190.1	159	0.391	0.534333	0.725072	0.729514	-0.143333	3.78052	7950000	8000000
OX359190.1	160	0.398	0.490333	0.854367	0.859602	-0.0923333	2.43536	8000000	8050000
OX359190.1	161	0.488333	0.712	0.708911	0.713255	-0.223667	5.89937	8050000	8100000
OX359190.1	162	0.461667	0.534667	0.863538	0.868829	-0.073	1.92543	8100000	8150000
OX359190.1	163	0.589667	0.640333	0.928545	0.934234	-0.0506667	1.33637	8150000	8200000
OX359190.1	164	0.247037	0.265926	0.855174	0.860413	-0.0188889	0.498208	8200000	8250000
OX359190.1	165	0.423	0.621	0.705922	0.710247	-0.198	5.22239	8250000	8300000
OX359190.1	166	0.284	0.328	0.913071	0.918665	-0.044	1.16053	8300000	8350000
OX359190.1	167	0.252333	0.31	0.798695	0.803588	-0.0576667	1.521	8350000	8400000
OX359190.1	168	0.260333	0.384667	0.618585	0.622375	-0.124333	3.27938	8400000	8450000
OX359190.1	169	0.288	0.312	0.917014	0.922632	-0.024	0.633017	8450000	8500000
OX359190.1	170	0.424333	0.487	0.901953	0.907479	-0.0626667	1.65288	8500000	8550000
OX359190.1	171	0.408	0.38	1.20775	1.21515	0.028	-0.73852	8550000	8600000
OX359190.1	172	0.495	0.541333	0.982732	0.988753	-0.0463333	1.22208	8600000	8650000
OX359190.1	173	0.417333	0.646333	0.638619	0.642531	-0.229	6.04004	8650000	8700000
OX359190.1	174	0.449333	0.480667	0.93597	0.941704	-0.0313333	0.826439	8700000	8750000
OX359190.1	175	0.507333	0.426	1.21668	1.22414	0.0813333	-2.14523	8750000	8800000
OX359190.1	176	0.396	0.522333	0.784036	0.788839	-0.126333	3.33213	8800000	8850000
OX359190.1	177	0.590333	0.538333	1.13578	1.14274	0.052	-1.37154	8850000	8900000
OX359190.1	178	0.432333	0.601	0.671591	0.675705	-0.168667	4.44871	8900000	8950000
OX359190.1	179	0.508667	0.628	0.80606	0.810999	-0.119333	3.1475	8950000	9000000
OX359190.1	180	0.481	0.496667	1.07138	1.07794	-0.0156667	0.41322	9000000	9050000
OX359190.1	181	0.371667	0.356	1.06404	1.07056	0.0156667	-0.41322	9050000	9100000
OX359190.1	182	0.319	0.308333	1.13525	1.1422	0.0106667	-0.281341	9100000	9150000
OX359190.1	183	0.484333	0.499333	1.01763	1.02386	-0.015	0.395636	9150000	9200000
OX359190.1	184	0.466333	0.503	0.98577	0.991809	-0.0366667	0.96711	9200000	9250000
OX359190.1	185	0.617333	0.651667	0.989687	0.99575	-0.0343333	0.905567	9250000	9300000
OX359190.1	186	0.522333	0.615333	0.877559	0.882935	-0.093	2.45294	9300000	9350000
OX359190.1	187	0.533333	0.618	0.790606	0.79545	-0.0846667	2.23314	9350000	9400000
OX359190.1	188	0.45	0.586333	0.76691	0.771608	-0.136333	3.59589	9400000	9450000
OX359190.1	189	0.626667	0.780333	0.830727	0.835816	-0.153667	4.05307	9450000	9500000
OX359190.1	190	0.452667	0.501	0.908227	0.913791	-0.0483333	1.27483	9500000	9550000
OX359190.1	191	0.316667	0.350667	0.923561	0.929219	-0.034	0.896775	9550000	9600000
OX359190.1	192	0.511667	0.654	0.779523	0.784298	-0.142333	3.75415	9600000	9650000
OX359190.1	193	0.460333	0.518667	0.946831	0.952632	-0.0583333	1.53858	9650000	9700000
OX359190.1	194	0.415333	0.526667	0.762955	0.767629	-0.111333	2.9365	9700000	9750000
OX359190.1	195	0.454333	0.518667	0.896536	0.902028	-0.0643333	1.69684	9750000	9800000
OX359190.1	196	0.325667	0.399	0.843398	0.848565	-0.0733333	1.93422	9800000	9850000
OX359190.1	197	0.476	0.394667	1.21956	1.22703	0.0813333	-2.14523	9850000	9900000
OX359190.1	198	0.174667	0.249667	0.681392	0.685567	-0.075	1.97818	9900000	9950000
OX359190.1	199	0.393	0.426667	0.968354	0.974287	-0.0336667	0.887983	9950000	10000000
OX359190.1	200	0.651333	0.814333	0.823158	0.828201	-0.163	4.29924	10000000	10050000
OX359190.1	201	0.391333	0.524333	0.719547	0.723955	-0.133	3.50797	10050000	10100000
OX359190.1	202	0.185333	0.283333	0.825415	0.830472	-0.098	2.58482	10100000	10150000
OX359190.1	203	0.211	0.238667	0.985972	0.992013	-0.0276667	0.729728	10150000	10200000
OX359190.1	204	0.298333	0.301667	0.90744	0.912999	-0.00333333	0.0879191	10200000	10250000
OX359190.1	205	0.341429	0.382857	0.912494	0.918085	-0.0414286	1.09271	10250000	10285000
OX359191.1	0	0.205	0.232333	0.832544	0.837645	-0.0273333	0.720937	0	50000
OX359191.1	1	0.381333	0.460333	0.814686	0.819677	-0.079	2.08368	50000	100000
OX359191.1	2	0.453333	0.544667	0.813181	0.818163	-0.0913333	2.40898	100000	150000
OX359191.1	3	0.353667	0.411333	0.875322	0.880684	-0.0576667	1.521	150000	200000
OX359191.1	4	0.238333	0.224333	0.813327	0.81831	0.014	-0.36926	200000	250000
OX359191.1	5	0.56	0.589	0.980171	0.986176	-0.029	0.764896	250000	300000
OX359191.1	6	0.481667	0.546	0.886916	0.892349	-0.0643333	1.69684	300000	350000
OX359191.1	7	0.508333	0.527	1.04668	1.0531	-0.0186667	0.492347	350000	400000
OX359191.1	8	0.361	0.356667	1.38005	1.38851	0.00433333	-0.114295	400000	450000
OX359191.1	9	0.185667	0.176333	1.00221	1.00835	0.00933333	-0.246173	450000	500000
OX359191.1	10	0.36	0.414	0.90306	0.908593	-0.054	1.42429	500000	550000
OX359191.1	11	0.526333	0.468667	1.13895	1.14593	0.0576667	-1.521	550000	600000
OX359191.1	12	0.668667	0.681333	0.986698	0.992743	-0.0126667	0.334093	600000	650000
OX359191.1	13	0.893333	0.976333	0.915069	0.920675	-0.083	2.18919	650000	700000
OX359191.1	14	0.676667	0.777667	0.883932	0.889348	-0.101	2.66395	700000	750000
OX359191.1	15	0.269667	0.329333	0.966137	0.972056	-0.0596667	1.57375	750000	800000
OX359191.1	16	0.231	0.355333	0.666863	0.670948	-0.124333	3.27938	800000	850000
OX359191.1	17	0.305667	0.414667	0.764975	0.769661	-0.109	2.87495	850000	900000
OX359191.1	18	0.333667	0.42	0.815698	0.820696	-0.0863333	2.2771	900000	950000
OX359191.1	19	0.186	0.255667	0.779493	0.784269	-0.0696667	1.83751	950000	1000000
OX359191.1	20	0.461667	0.623	0.727217	0.731672	-0.161333	4.25528	1000000	1050000
OX359191.1	21	0.522333	0.695	0.730547	0.735023	-0.172667	4.55421	1050000	1100000
OX359191.1	22	0.241667	0.285667	0.873597	0.878949	-0.044	1.16053	1100000	1150000
OX359191.1	23	0.295	0.3	1.02025	1.0265	-0.005	0.131879	1150000	1200000
OX359191.1	24	0.347	0.377667	0.941209	0.946976	-0.0306667	0.808856	1200000	1250000
OX359191.1	25	0.243	0.305667	0.799906	0.804806	-0.0626667	1.65288	1250000	1300000
OX359191.1	26	0.440667	0.423333	1.13055	1.13748	0.0173333	-0.457179	1300000	1350000
OX359191.1	27	0.519333	0.528333	1.0108	1.01699	-0.009	0.237382	1350000	1400000
OX359191.1	28	0.544667	0.638667	0.91448	0.920083	-0.094	2.47932	1400000	1450000
OX359191.1	29	0.386	0.319	1.46112	1.47007	0.067	-1.76717	1450000	1500000
OX359191.1	30	0.420333	0.380333	1.27154	1.27933	0.04	-1.05503	1500000	1550000
OX359191.1	31	0.356667	0.411	0.889651	0.895101	-0.0543333	1.43308	1550000	1600000
OX359191.1	32	0.258667	0.314667	0.781928	0.786719	-0.056	1.47704	1600000	1650000
OX359191.1	33	0.526	0.56	1.00881	1.015	-0.034	0.896775	1650000	1700000
OX359191.1	34	0.469	0.536667	0.887287	0.892723	-0.0676667	1.78476	1700000	1750000
OX359191.1	35	0.434	0.438	1.22015	1.22762	-0.004	0.105503	1750000	1800000
OX359191.1	36	0.522333	0.654	0.812473	0.81745	-0.131667	3.4728	1800000	1850000
OX359191.1	37	0.462	0.472333	0.921601	0.927248	-0.0103333	0.272549	1850000	1900000
OX359191.1	38	0.302	0.367667	0.779363	0.784138	-0.0656667	1.73201	1900000	1950000
OX359191.1	39	0.520667	0.489	1.08781	1.09447	0.0316667	-0.835231	1950000	2000000
OX359191.1	40	0.481667	0.421	1.19006	1.19735	0.0606667	-1.60013	2000000	2050000
OX359191.1	41	0.367	0.438	0.87204	0.877383	-0.071	1.87268	2050000	2100000
OX359191.1	42	0.664333	0.706333	0.943045	0.948823	-0.042	1.10778	2100000	2150000
OX359191.1	43	0.493	0.556333	0.885284	0.890707	-0.0633333	1.67046	2150000	2200000
OX359191.1	44	0.377667	0.640667	0.634879	0.638768	-0.263	6.93682	2200000	2250000
OX359191.1	45	0.330667	0.389333	0.885184	0.890607	-0.0586667	1.54738	2250000	2300000
OX359191.1	46	0.389	0.481667	0.834063	0.839173	-0.0926667	2.44415	2300000	2350000
OX359191.1	47	0.510667	0.625667	0.898248	0.903751	-0.115	3.03321	2350000	2400000
OX359191.1	48	0.338	0.413667	0.887022	0.892456	-0.0756667	1.99576	2400000	2450000
OX359191.1	49	0.264333	0.351	0.761555	0.766221	-0.0866667	2.2859	2450000	2500000
OX359191.1	50	0.566	0.561333	1.07825	1.08485	0.00466667	-0.123087	2500000	2550000
OX359191.1	51	0.334	0.312333	1.07502	1.0816	0.0216667	-0.571474	2550000	2600000
OX359191.1	52	0.248	0.189333	1.39048	1.399	0.0586667	-1.54738	2600000	2650000
OX359191.1	53	0.0553333	0.0503333	1.29148	1.29939	0.005	-0.131879	2650000	2700000
OX359191.1	54	0.0653333	0.0663333	1.08679	1.09345	-0.001	0.0263757	2700000	2750000
OX359191.1	55	0.101333	0.0836667	1.3903	1.39882	0.0176667	-0.465971	2750000	2800000
OX359191.1	56	0.130333	0.119333	1.04737	1.05379	0.011	-0.290133	2800000	2850000
OX359191.1	57	0.335	0.199333	1.70802	1.71848	0.135667	-3.57831	2850000	2900000
OX359191.1	58	0.391667	0.158667	3.22684	3.2466	0.233	-6.14554	2900000	2950000
OX359191.1	59	0.372667	0.353	1.26323	1.27097	0.0196667	-0.518723	2950000	3000000
OX359191.1	60	0.327667	0.200333	2.43749	2.45242	0.127333	-3.35851	3000000	3050000
OX359191.1	61	0.286	0.214667	1.27956	1.2874	0.0713333	-1.88147	3050000	3100000
OX359191.1	62	0.320333	0.233	1.43123	1.44	0.0873333	-2.30348	3100000	3150000
OX359191.1	63	0.31	0.235333	1.52411	1.53345	0.0746667	-1.96939	3150000	3200000
OX359191.1	64	0.112	0.117	1.11173	1.11854	-0.005	0.131879	3200000	3250000
OX359191.1	65	0.0746667	0.098	0.864663	0.86996	-0.0233333	0.615434	3250000	3300000
OX359191.1	66	0.0683333	0.067	1.27111	1.2789	0.00133333	-0.0351676	3300000	3350000
OX359191.1	67	0.069	0.071	1.16534	1.17248	-0.002	0.0527515	3350000	3400000
OX359191.1	68	0.0633333	0.0696667	0.88252	0.887927	-0.00633333	0.167046	3400000	3450000
OX359191.1	69	0.0423333	0.046	0.935566	0.941297	-0.00366667	0.096711	3450000	3500000
OX359191.1	70	0.06	0.052	1.40385	1.41245	0.008	-0.211006	3500000	3550000
OX359191.1	71	0.0893333	0.088	1.27719	1.28501	0.00133333	-0.0351676	3550000	3600000
OX359191.1	72	0.211	0.164333	1.29396	1.30189	0.0466667	-1.23087	3600000	3650000
OX359191.1	73	0.219	0.165333	1.9718	1.98388	0.0536667	-1.4155	3650000	3700000
OX359191.1	74	0.294	0.193333	2.47433	2.48949	0.100667	-2.65516	3700000	3750000
OX359191.1	75	0.138667	0.130667	1.19642	1.20375	0.008	-0.211006	3750000	3800000
OX359191.1	76	0.0856667	0.0696667	2.01691	2.02926	0.016	-0.422012	3800000	3850000
OX359191.1	77	0.0626667	0.079	1.00792	1.0141	-0.0163333	0.430804	3850000	3900000
OX359191.1	78	0.0703333	0.0813333	0.903206	0.90874	-0.011	0.290133	3900000	3950000
OX359191.1	79	0.113	0.0873333	1.38055	1.389	0.0256667	-0.676977	3950000	4000000
OX359191.1	80	0.0773333	0.0706667	1.09039	1.09707	0.00666667	-0.175838	4000000	4050000
OX359191.1	81	0.0746667	0.0806667	0.942362	0.948135	-0.006	0.158254	4050000	4100000
OX359191.1	82	0.054	0.067	1.80116	1.8122	-0.013	0.342884	4100000	4150000
OX359191.1	83	0.0853333	0.071	1.22952	1.23705	0.0143333	-0.378052	4150000	4200000
OX359191.1	84	0.352593	0.259259	1.92256	1.93434	0.0933333	-2.46173	4200000	4250000
OX359191.1	85	0.445333	0.278333	2.14667	2.15982	0.167	-4.40475	4250000	4300000
OX359191.1	86	0.298889	0.243704	1.53959	1.54902	0.0551852	-1.45555	4305000	4350000
OX359191.1	87	0.340333	0.135667	3.32722	3.3476	0.204667	-5.39823	4350000	4400000
OX359191.1	88	0.378333	0.355	1.04746	1.05388	0.0233333	-0.615434	4400000	4450000
OX359191.1	89	0.47	0.449333	1.04894	1.05537	0.0206667	-0.545098	4450000	4500000
OX359191.1	90	0.399	0.372	1.17275	1.17994	0.027	-0.712145	4500000	4550000
OX359191.1	91	0.496	0.437	1.24319	1.2508	0.059	-1.55617	4550000	4600000
OX359191.1	92	0.489	0.548	0.835784	0.840904	-0.059	1.55617	4600000	4650000
OX359191.1	93	0.417333	0.412667	1.04888	1.0553	0.00466667	-0.123087	4650000	4700000
OX359191.1	94	0.253	0.321333	0.718196	0.722596	-0.0683333	1.80234	4700000	4750000
OX359191.1	95	0.297	0.239667	1.78387	1.7948	0.0573333	-1.51221	4750000	4800000
OX359191.1	96	0.250333	0.147667	1.82563	1.83682	0.102667	-2.70791	4800000	4850000
OX359191.1	97	0.174333	0.154	1.25878	1.26649	0.0203333	-0.536306	4850000	4900000
OX359191.1	98	0.195	0.186667	1.02874	1.03504	0.00833333	-0.219798	4900000	4950000
OX359191.1	99	0.304333	0.323	1.2211	1.22858	-0.0186667	0.492347	4950000	5000000
OX359191.1	100	0.304667	0.216667	3.24972	3.26963	0.088	-2.32106	5000000	5050000
OX359191.1	101	0.127667	0.099	1.91006	1.92176	0.0286667	-0.756104	5050000	5100000
OX359191.1	102	0.312333	0.382333	0.845613	0.850793	-0.07	1.8463	5100000	5150000
OX359191.1	103	0.186333	0.239667	0.827214	0.832282	-0.0533333	1.40671	5150000	5200000
OX359191.1	104	0.298333	0.555	0.490302	0.493306	-0.256667	6.76977	5200000	5250000
OX359191.1	105	0.205333	0.397333	0.527276	0.530506	-0.192	5.06414	5250000	5300000
OX359191.1	106	0.221	0.415	0.504047	0.507135	-0.194	5.11689	5300000	5350000
OX359191.1	107	0.254667	0.390667	0.665186	0.669262	-0.136	3.5871	5350000	5400000
OX359191.1	108	0.276	0.303	0.936402	0.942139	-0.027	0.712145	5400000	5450000
OX359191.1	109	0.598	0.705333	0.886394	0.891825	-0.107333	2.83099	5450000	5500000
OX359191.1	110	0.258333	0.302667	0.786547	0.791366	-0.0443333	1.16932	5500000	5550000
OX359191.1	111	0.408333	0.335	3.05248	3.07119	0.0733333	-1.93422	5550000	5600000
OX359191.1	112	0.698667	0.802333	1.23629	1.24386	-0.103667	2.73428	5600000	5650000
OX359191.1	113	0.755	0.926333	0.851959	0.857179	-0.171333	4.51904	5650000	5700000
OX359191.1	114	0.449333	0.469667	1.02633	1.03262	-0.0203333	0.536306	5700000	5750000
OX359191.1	115	0.274333	0.326	0.838969	0.844109	-0.0516667	1.36275	5750000	5800000
OX359191.1	116	0.455	0.376333	1.31442	1.32247	0.0786667	-2.07489	5800000	5850000
OX359191.1	117	0.414667	0.393	1.11555	1.12239	0.0216667	-0.571474	5850000	5900000
OX359191.1	118	0.413333	0.447	0.936762	0.942501	-0.0336667	0.887983	5900000	5950000
OX359191.1	119	0.587333	0.604667	1.03806	1.04442	-0.0173333	0.457179	5950000	6000000
OX359191.1	120	0.459667	0.376333	1.2512	1.25887	0.0833333	-2.19798	6000000	6050000
OX359191.1	121	0.339333	0.406	0.865304	0.870605	-0.0666667	1.75838	6050000	6100000
OX359191.1	122	0.337	0.398667	0.822391	0.827429	-0.0616667	1.6265	6100000	6150000
OX359191.1	123	0.195	0.279333	2.25	2.26378	-0.0843333	2.22435	6150000	6200000
OX359191.1	124	0.386333	0.675667	0.588881	0.592489	-0.289333	7.63138	6200000	6250000
OX359191.1	125	0.279	0.516667	0.501096	0.504166	-0.237667	6.26863	6250000	6300000
OX359191.1	126	0.238333	0.371333	0.871491	0.87683	-0.133	3.50797	6300000	6350000
OX359191.1	127	0.369667	0.497667	0.773454	0.778192	-0.128	3.37609	6350000	6400000
OX359191.1	128	0.613667	0.534	1.21866	1.22612	0.0796667	-2.10127	6400000	6450000
OX359191.1	129	0.411667	0.426667	0.996778	1.00288	-0.015	0.395636	6450000	6500000
OX359191.1	130	0.301	0.325333	0.947021	0.952823	-0.0243333	0.641809	6500000	6550000
OX359191.1	131	0.296	0.243	3.25419	3.27413	0.053	-1.39791	6550000	6600000
OX359191.1	132	0.548	0.559667	0.990321	0.996388	-0.0116667	0.307717	6600000	6650000
OX359191.1	133	0.218333	0.210333	1.07895	1.08556	0.008	-0.211006	6650000	6700000
OX359191.1	134	0.179333	0.211333	0.828225	0.8333	-0.032	0.844023	6700000	6750000
OX359191.1	135	0.158667	0.168667	1.22013	1.22761	-0.01	0.263757	6750000	6800000
OX359191.1	136	0.443333	0.412	1.03632	1.04267	0.0313333	-0.826439	6800000	6850000
OX359191.1	137	0.602333	0.558667	1.12863	1.13554	0.0436667	-1.15174	6850000	6900000
OX359191.1	138	0.470667	0.502	0.94746	0.953264	-0.0313333	0.826439	6900000	6950000
OX359191.1	139	0.431667	0.487667	0.906375	0.911928	-0.056	1.47704	6950000	7000000
OX359191.1	140	0.283704	0.311111	2.40616	2.4209	-0.0274074	0.72289	7000000	7050000
OX359191.1	141	0.416296	0.487407	0.847095	0.852285	-0.0711111	1.87561	7055000	7100000
OX359191.1	142	0.432	0.557333	0.766889	0.771587	-0.125333	3.30576	7100000	7150000
OX359191.1	143	0.325333	0.41	0.832877	0.837979	-0.0846667	2.23314	7150000	7200000
OX359191.1	144	0.377667	0.422667	0.980605	0.986613	-0.045	1.18691	7200000	7250000
OX359191.1	145	0.261667	0.332333	0.770543	0.775264	-0.0706667	1.86388	7250000	7300000
OX359191.1	146	0.243667	0.248	1.00825	1.01443	-0.00433333	0.114295	7300000	7350000
OX359191.1	147	0.201	0.256333	0.754186	0.758807	-0.0553333	1.45946	7350000	7400000
OX359191.1	148	0.352333	0.442667	0.843099	0.848265	-0.0903333	2.38261	7400000	7450000
OX359191.1	149	0.601333	0.648	0.925136	0.930804	-0.0466667	1.23087	7450000	7500000
OX359191.1	150	0.467333	0.481333	1.00825	1.01443	-0.014	0.36926	7500000	7550000
OX359191.1	151	0.369	0.363	1.0359	1.04224	0.006	-0.158254	7550000	7600000
OX359191.1	152	0.324333	0.273	1.13399	1.14094	0.0513333	-1.35395	7600000	7650000
OX359191.1	153	0.389333	0.436333	0.889444	0.894893	-0.047	1.23966	7650000	7700000
OX359191.1	154	0.165333	0.164333	0.889297	0.894745	0.001	-0.0263757	7700000	7750000
OX359191.1	155	0.197	0.267333	0.733027	0.737518	-0.0703333	1.85509	7750000	7800000
OX359191.1	156	0.274333	0.348	0.79969	0.804589	-0.0736667	1.94301	7800000	7850000
OX359191.1	157	0.247667	0.239333	1.37385	1.38226	0.00833333	-0.219798	7850000	7900000
OX359191.1	158	0.199667	0.216333	1.06168	1.06818	-0.0166667	0.439595	7900000	7950000
OX359191.1	159	0.184333	0.201333	4.58331	4.61139	-0.017	0.448387	7950000	8000000
OX359191.1	160	0.314	0.461	0.719377	0.723785	-0.147	3.87723	8000000	8050000
OX359191.1	161	0.23	0.390667	0.579336	0.582885	-0.160667	4.2377	8050000	8100000
OX359191.1	162	0.367667	0.502	0.805509	0.810444	-0.134333	3.54314	8100000	8150000
OX359191.1	163	0.260667	0.271333	1.06166	1.06817	-0.0106667	0.281341	8150000	8200000
OX359191.1	164	0.216333	0.273333	0.745087	0.749651	-0.057	1.50342	8200000	8250000
OX359191.1	165	0.374333	0.499333	0.73431	0.738809	-0.125	3.29697	8250000	8300000
OX359191.1	166	0.259667	0.501333	0.516351	0.519514	-0.241667	6.37413	8300000	8350000
OX359191.1	167	0.243	0.238667	1.06551	1.07204	0.00433333	-0.114295	8350000	8400000
OX359191.1	168	0.287333	0.190333	1.67064	1.68088	0.097	-2.55845	8400000	8450000
OX359191.1	169	0.433667	0.462	0.928741	0.934431	-0.0283333	0.747312	8450000	8500000
OX359191.1	170	0.347667	0.427333	0.817045	0.822051	-0.0796667	2.10127	8500000	8550000
OX359191.1	171	0.506667	0.399667	1.31399	1.32204	0.107	-2.8222	8550000	8600000
OX359191.1	172	0.380333	0.347667	1.03524	1.04158	0.0326667	-0.861607	8600000	8650000
OX359191.1	173	0.282333	0.268	1.172	1.17918	0.0143333	-0.378052	8650000	8700000
OX359191.1	174	0.280667	0.276333	1.02216	1.02842	0.00433333	-0.114295	8700000	8750000
OX359191.1	175	0.271	0.310333	0.93211	0.93782	-0.0393333	1.03745	8750000	8800000
OX359191.1	176	0.0820833	0.135833	0.571225	0.574725	-0.05375	1.4177	8800000	8850000
OX359191.1	177	0.120417	0.09625	1.33298	1.34115	0.0241667	-0.637413	8850000	8900000
OX359191.1	178	0.300667	0.378	0.815791	0.820789	-0.0773333	2.03972	8900000	8950000
OX359191.1	179	0.248	0.282333	1.40697	1.41559	-0.0343333	0.905567	8950000	9000000
OX359191.1	180	0.202333	0.206	1.08534	1.09199	-0.00366667	0.096711	9000000	9050000
OX359191.1	181	0.267	0.303333	0.959073	0.964948	-0.0363333	0.958318	9050000	9100000
OX359191.1	182	0.401667	0.378	1.08616	1.09281	0.0236667	-0.624226	9100000	9150000
OX359191.1	183	0.286333	0.227667	1.6021	1.61192	0.0586667	-1.54738	9150000	9200000
OX359191.1	184	0.388333	0.360667	1.5584	1.56795	0.0276667	-0.729728	9200000	9250000
OX359191.1	185	0.22	0.193	1.14121	1.14821	0.027	-0.712145	9250000	9300000
OX359191.1	186	0.238333	0.226667	1.05913	1.06562	0.0116667	-0.307717	9300000	9350000
OX359191.1	187	0.130667	0.138333	0.956084	0.961942	-0.00766667	0.202214	9350000	9400000
OX359191.1	188	0.116667	0.111111	0.916229	0.921843	0.00555556	-0.146532	9400000	9415000
OX359192.1	0	0.102667	0.112333	0.949803	0.955622	-0.00966667	0.254965	0	50000
OX359192.1	1	0.093	0.132	0.745348	0.749915	-0.039	1.02865	50000	100000
OX359192.1	2	0.154667	0.158	1.11322	1.12004	-0.00333333	0.0879191	100000	150000
OX359192.1	3	0.254667	0.265667	0.988618	0.994675	-0.011	0.290133	150000	200000
OX359192.1	4	0.213333	0.241	1.1608	1.16791	-0.0276667	0.729728	200000	250000
OX359192.1	5	0.138333	0.337667	0.374145	0.376437	-0.199333	5.25756	250000	300000
OX359192.1	6	0.386333	0.407333	1.05339	1.05985	-0.021	0.55389	300000	350000
OX359192.1	7	0.4	0.431333	0.915443	0.921051	-0.0313333	0.826439	350000	400000
OX359192.1	8	0.326333	0.418667	0.830793	0.835883	-0.0923333	2.43536	400000	450000
OX359192.1	9	0.194667	0.222667	0.715496	0.719879	-0.028	0.73852	450000	500000
OX359192.1	10	0.500333	0.619333	0.795086	0.799957	-0.119	3.13871	500000	550000
OX359192.1	11	0.440667	0.484667	0.881184	0.886582	-0.044	1.16053	550000	600000
OX359192.1	12	0.372667	0.383	1.02406	1.03033	-0.0103333	0.272549	600000	650000
OX359192.1	13	0.509333	0.472333	1.1639	1.17103	0.037	-0.975902	650000	700000
OX359192.1	14	0.548667	0.649667	0.828008	0.83308	-0.101	2.66395	700000	750000
OX359192.1	15	0.479	0.421667	1.35619	1.36449	0.0573333	-1.51221	750000	800000
OX359192.1	16	0.426	0.370333	1.16787	1.17502	0.0556667	-1.46825	800000	850000
OX359192.1	17	0.302333	0.379333	0.805722	0.810659	-0.077	2.03093	850000	900000
OX359192.1	18	0.271667	0.38	0.725171	0.729613	-0.108333	2.85737	900000	950000
OX359192.1	19	0.317667	0.373	0.95843	0.964302	-0.0553333	1.45946	950000	1000000
OX359192.1	20	0.326333	0.446667	0.726223	0.730672	-0.120333	3.17388	1000000	1050000
OX359192.1	21	0.631	0.589667	1.09599	1.10271	0.0413333	-1.0902	1050000	1100000
OX359192.1	22	0.549333	0.447	1.40904	1.41767	0.102333	-2.69912	1100000	1150000
OX359192.1	23	0.611667	0.527667	1.32312	1.33122	0.084	-2.21556	1150000	1200000
OX359192.1	24	0.459	0.444333	1.01728	1.02351	0.0146667	-0.386844	1200000	1250000
OX359192.1	25	0.475	0.565	0.859959	0.865227	-0.09	2.37382	1250000	1300000
OX359192.1	26	0.474	0.521667	0.938635	0.944386	-0.0476667	1.25724	1300000	1350000
OX359192.1	27	0.438667	0.479	0.848659	0.853858	-0.0403333	1.06382	1350000	1400000
OX359192.1	28	0.306	0.305	1.02787	1.03416	0.001	-0.0263757	1400000	1450000
OX359192.1	29	0.491	0.49	1.05469	1.06115	0.001	-0.0263757	1450000	1500000
OX359192.1	30	0.316333	0.397667	0.782267	0.787059	-0.0813333	2.14523	1500000	1550000
OX359192.1	31	0.455333	0.513	0.916228	0.921841	-0.0576667	1.521	1550000	1600000
OX359192.1	32	0.597333	0.681667	0.881542	0.886943	-0.0843333	2.22435	1600000	1650000
OX359192.1	33	0.686	0.838667	0.876997	0.88237	-0.152667	4.02669	1650000	1700000
OX359192.1	34	0.513333	0.665	0.761596	0.766262	-0.151667	4.00032	1700000	1750000
OX359192.1	35	0.594	0.698	0.882411	0.887817	-0.104	2.74308	1750000	1800000
OX359192.1	36	0.382333	0.387	1.04658	1.05299	-0.00466667	0.123087	1800000	1850000
OX359192.1	37	0.39875	0.453333	0.975791	0.98177	-0.0545833	1.43968	1850000	1890000
OX359192.1	38	0.158889	0.177037	0.834874	0.839989	-0.0181481	0.478671	1900000	1950000
OX359192.1	39	0.210667	0.27	0.750018	0.754613	-0.0593333	1.56496	1950000	2000000
OX359192.1	40	0.476333	0.509	0.93477	0.940497	-0.0326667	0.861607	2000000	2050000
OX359192.1	41	0.448667	0.511	0.907205	0.912763	-0.0623333	1.64409	2050000	2100000
OX359192.1	42	0.350667	0.465667	0.766204	0.770898	-0.115	3.03321	2100000	2150000
OX359192.1	43	0.706667	0.778	0.917568	0.923189	-0.0713333	1.88147	2150000	2200000
OX359192.1	44	0.427333	0.526	0.932836	0.938551	-0.0986667	2.60241	2200000	2250000
OX359192.1	45	0.512667	0.565667	0.922552	0.928204	-0.053	1.39791	2250000	2300000
OX359192.1	46	0.609333	0.696667	0.863307	0.868596	-0.0873333	2.30348	2300000	2350000
OX359192.1	47	0.193333	0.273	0.744146	0.748705	-0.0796667	2.10127	2350000	2400000
OX359192.1	48	0.271333	0.268	1.06884	1.07538	0.00333333	-0.0879191	2400000	2450000
OX359192.1	49	0.446	0.440667	1.13998	1.14696	0.00533333	-0.140671	2450000	2500000
OX359192.1	50	0.461	0.467667	0.970576	0.976522	-0.00666667	0.175838	2500000	2550000
OX359192.1	51	0.419	0.485333	0.892682	0.898151	-0.0663333	1.74959	2550000	2600000
OX359192.1	52	0.235	0.283333	0.891634	0.897096	-0.0483333	1.27483	2600000	2650000
OX359192.1	53	0.186667	0.230333	0.781872	0.786662	-0.0436667	1.15174	2650000	2700000
OX359192.1	54	0.448667	0.44	1.04424	1.05063	0.00866667	-0.22859	2700000	2750000
OX359192.1	55	0.478	0.304333	1.98564	1.9978	0.173667	-4.58058	2750000	2800000
OX359192.1	56	0.263	0.334	0.815122	0.820116	-0.071	1.87268	2800000	2850000
OX359192.1	57	0.465	0.469	0.971218	0.977168	-0.004	0.105503	2850000	2900000
OX359192.1	58	0.759333	0.867	0.883912	0.889327	-0.107667	2.83979	2900000	2950000
OX359192.1	59	0.276	0.313333	1.1114	1.11821	-0.0373333	0.984694	2950000	3000000
OX359192.1	60	0.262333	0.414	0.631655	0.635524	-0.151667	4.00032	3000000	3050000
OX359192.1	61	0.327333	0.343333	0.96681	0.972733	-0.016	0.422012	3050000	3100000
OX359192.1	62	0.746667	0.708	1.20804	1.21544	0.0386667	-1.01986	3100000	3150000
OX359192.1	63	0.488	0.420333	1.39643	1.40499	0.0676667	-1.78476	3150000	3200000
OX359192.1	64	0.0983333	0.110333	0.927974	0.933659	-0.012	0.316509	3200000	3250000
OX359192.1	65	0.0507407	0.0403704	1.76771	1.77854	0.0103704	-0.273526	3250000	3300000
OX359192.1	66	0.164333	0.127	2.05805	2.07066	0.0373333	-0.984694	3300000	3350000
OX359192.1	67	0.143333	0.135	1.11333	1.12015	0.00833333	-0.219798	3350000	3400000
OX359192.1	68	0.129333	0.133333	1.0735	1.08008	-0.004	0.105503	3400000	3450000
OX359192.1	69	0.0726667	0.0513333	1.02006	1.02631	0.0213333	-0.562682	3450000	3485000
OX359192.1	70	0.083	0.115667	0.751559	0.756164	-0.0326667	0.861607	3500000	3550000
OX359192.1	71	0.149333	0.256667	0.583732	0.587308	-0.107333	2.83099	3550000	3600000
OX359192.1	72	0.0916667	0.163667	0.540589	0.543901	-0.072	1.89905	3600000	3650000
OX359192.1	73	0.0691667	0.0991667	0.686872	0.69108	-0.03	0.791272	3660000	3700000
OX359192.1	74	0.0546667	0.033	1.59128	1.60103	0.0216667	-0.571474	3700000	3750000
OX359192.1	75	0.136333	0.078	2.09207	2.10489	0.0583333	-1.53858	3750000	3800000
OX359192.1	76	0.0873333	0.0563333	3.1214	3.14052	0.031	-0.817648	3800000	3850000
OX359192.1	77	0.0866667	0.067	1.45171	1.4606	0.0196667	-0.518723	3850000	3900000
OX359192.1	78	0.0726667	0.0496667	1.94542	1.95734	0.023	-0.606642	3900000	3950000
OX359192.1	79	0.0529167	0.0691667	0.516849	0.520016	-0.01625	0.428606	3950000	4000000
OX359192.1	80	0.232333	0.172333	1.01895	1.0252	0.06	-1.58254	4000000	4050000
OX359192.1	81	0.294444	0.18037	1.61615	1.62605	0.114074	-3.00879	4050000	4100000
OX359192.1	82	0.159	0.149667	1.49982	1.50901	0.00933333	-0.246173	4100000	4150000
OX359192.1	83	0.0511111	0.115926	0.783265	0.788063	-0.0648148	1.70954	4150000	4195000
OX359192.1	84	0.0385185	0.0351852	0.98733	0.993379	0.00333333	-0.0879191	4200000	4250000
OX359192.1	85	0.056	0.038	1.62937	1.63935	0.018	-0.474763	4250000	4300000
OX359192.1	86	0.092	0.0743333	0.92034	0.925979	0.0176667	-0.465971	4300000	4350000
OX359192.1	87	0.0426667	0.045	1.23614	1.24371	-0.00233333	0.0615434	4350000	4400000
OX359192.1	88	0.025	0.0343333	1.32925	1.33739	-0.00933333	0.246173	4400000	4450000
OX359192.1	89	0.01625	0.015	0.88934	0.894788	0.00125	-0.0329697	4455000	4495000
OX359192.1	90	0.561333	0.506333	0.888456	0.893899	0.055	-1.45067	4500000	4550000
OX359192.1	91	0.160333	0.289667	0.520237	0.523424	-0.129333	3.41126	4550000	4600000
OX359192.1	92	0.255667	0.388333	0.678813	0.682972	-0.132667	3.49918	4600000	4650000
OX359192.1	93	0.263333	0.418	0.596513	0.600167	-0.154667	4.07945	4650000	4700000
OX359192.1	94	0.254333	0.389	0.623117	0.626935	-0.134667	3.55193	4700000	4750000
OX359192.1	95	0.316	0.274333	1.20934	1.21675	0.0416667	-1.09899	4750000	4800000
OX359192.1	96	0.164333	0.205667	0.794501	0.799368	-0.0413333	1.0902	4800000	4850000
OX359192.1	97	0.190333	0.197333	1.06625	1.07278	-0.007	0.18463	4850000	4900000
OX359192.1	98	0.0443333	0.105667	0.530679	0.53393	-0.0613333	1.61771	4900000	4950000
OX359192.1	99	0.0540741	0.0662963	0.559217	0.562643	-0.0122222	0.32237	4950000	5000000
OX359192.1	100	0.224333	0.266333	0.938002	0.943748	-0.042	1.10778	5000000	5050000
OX359192.1	101	0.307667	0.367	0.831996	0.837093	-0.0593333	1.56496	5050000	5100000
OX359192.1	102	0.250667	0.332333	0.797134	0.802017	-0.0816667	2.15402	5100000	5150000
OX359192.1	103	0.167667	0.217333	0.829439	0.834521	-0.0496667	1.30999	5150000	5200000
OX359192.1	104	0.284667	0.277333	0.981511	0.987524	0.00733333	-0.193422	5200000	5250000
OX359192.1	105	0.284333	0.306667	0.936975	0.942715	-0.0223333	0.589058	5250000	5300000
OX359192.1	106	0.392667	0.447667	0.885054	0.890476	-0.055	1.45067	5300000	5350000
OX359192.1	107	0.243	0.319667	0.913129	0.918723	-0.0766667	2.02214	5350000	5400000
OX359192.1	108	0.246667	0.298667	0.87169	0.877031	-0.052	1.37154	5400000	5450000
OX359192.1	109	0.237667	0.288	0.825723	0.830782	-0.0503333	1.32758	5450000	5500000
OX359192.1	110	0.326667	0.35	0.952159	0.957992	-0.0233333	0.615434	5500000	5550000
OX359192.1	111	0.239667	0.233667	1.09	1.09668	0.006	-0.158254	5550000	5600000
OX359192.1	112	0.193	0.197667	0.873596	0.878948	-0.00466667	0.123087	5600000	5650000
OX359192.1	113	0.297667	0.282667	1.04561	1.05202	0.015	-0.395636	5650000	5700000
OX359192.1	114	0.257	0.249	1.06832	1.07486	0.008	-0.211006	5700000	5750000
OX359192.1	115	0.326333	0.38	0.864127	0.869421	-0.0536667	1.4155	5750000	5800000
OX359192.1	116	0.303333	0.310667	1.01884	1.02508	-0.00733333	0.193422	5800000	5850000
OX359192.1	117	0.27	0.317667	0.954593	0.960442	-0.0476667	1.25724	5850000	5900000
OX359192.1	118	0.189	0.228667	0.851739	0.856957	-0.0396667	1.04624	5900000	5950000
OX359192.1	119	0.239	0.249333	1.02056	1.02681	-0.0103333	0.272549	5950000	6000000
OX359192.1	120	0.301	0.337	0.918271	0.923897	-0.036	0.949526	6000000	6050000
OX359192.1	121	0.295	0.332	0.950674	0.956498	-0.037	0.975902	6050000	6100000
OX359192.1	122	0.282667	0.336333	0.842414	0.847575	-0.0536667	1.4155	6100000	6150000
OX359192.1	123	0.604333	0.616	1.14306	1.15006	-0.0116667	0.307717	6150000	6200000
OX359192.1	124	0.346	0.239667	1.4975	1.50667	0.106333	-2.80462	6200000	6250000
OX359192.1	125	0.0586667	0.0766667	0.60773	0.611453	-0.018	0.474763	6250000	6300000
OX359192.1	126	0.200333	0.190667	1.19629	1.20362	0.00966667	-0.254965	6300000	6350000
OX359192.1	127	0.296333	0.384	0.822841	0.827882	-0.0876667	2.31227	6350000	6400000
OX359192.1	128	0.184333	0.209	0.941377	0.947144	-0.0246667	0.650601	6400000	6450000
OX359192.1	129	0.244667	0.372667	0.656446	0.660467	-0.128	3.37609	6450000	6500000
OX359192.1	130	0.276333	0.453	0.614179	0.617942	-0.176667	4.65971	6500000	6550000
OX359192.1	131	0.289333	0.402667	0.708101	0.712439	-0.113333	2.98925	6550000	6600000
OX359192.1	132	0.298667	0.452333	0.626581	0.630419	-0.153667	4.05307	6600000	6650000
OX359192.1	133	0.193667	0.310333	0.613182	0.616938	-0.116667	3.07717	6650000	6700000
OX359192.1	134	0.193667	0.275	0.725889	0.730336	-0.0813333	2.14523	6700000	6750000
OX359192.1	135	0.158333	0.239333	0.634764	0.638653	-0.081	2.13643	6750000	6800000
OX359192.1	136	0.200667	0.18	1.27219	1.27998	0.0206667	-0.545098	6800000	6850000
OX359192.1	137	0.26	0.288	0.941675	0.947444	-0.028	0.73852	6850000	6900000
OX359192.1	138	0.323667	0.394333	0.885971	0.891399	-0.0706667	1.86388	6900000	6950000
OX359192.1	139	0.272667	0.31	0.856735	0.861984	-0.0373333	0.984694	6950000	7000000
OX359192.1	140	0.204333	0.282667	0.81982	0.824842	-0.0783333	2.0661	7000000	7050000
OX359192.1	141	0.129667	0.212667	0.632703	0.63658	-0.083	2.18919	7050000	7100000
OX359192.1	142	0.12	0.182667	0.846452	0.851638	-0.0626667	1.65288	7100000	7150000
OX359192.1	143	0.101333	0.142	0.728215	0.732676	-0.0406667	1.07261	7150000	7200000
OX359192.1	144	0.291333	0.288667	1.01687	1.0231	0.00266667	-0.0703353	7200000	7250000
OX359192.1	145	0.185	0.231333	0.806336	0.811276	-0.0463333	1.22208	7250000	7300000
OX359192.1	146	0.122	0.171	0.688353	0.69257	-0.049	1.29241	7300000	7350000
OX359192.1	147	0.466667	0.701	0.65546	0.659475	-0.234333	6.18071	7350000	7400000
OX359192.1	148	0.260667	0.295	1.18038	1.18761	-0.0343333	0.905567	7400000	7450000
OX359192.1	149	0.148	0.227	0.56267	0.566117	-0.079	2.08368	7450000	7500000
OX359192.1	150	0.162	0.149	1.18652	1.19379	0.013	-0.342884	7500000	7550000
OX359192.1	151	0.308667	0.325667	0.920509	0.926149	-0.017	0.448387	7550000	7600000
OX359192.1	152	0.166333	0.146667	1.16141	1.16853	0.0196667	-0.518723	7600000	7650000
OX359192.1	153	0.282	0.291667	1.10532	1.11209	-0.00966667	0.254965	7650000	7700000
OX359192.1	154	0.178667	0.166	1.12678	1.13369	0.0126667	-0.334093	7700000	7750000
OX359192.1	155	0.316333	0.353333	0.848216	0.853412	-0.037	0.975902	7750000	7800000
OX359192.1	156	0.295667	0.335333	0.880314	0.885707	-0.0396667	1.04624	7800000	7850000
OX359192.1	157	0.271667	0.288	0.993882	0.999971	-0.0163333	0.430804	7850000	7900000
OX359192.1	158	0.247	0.209333	1.18474	1.192	0.0376667	-0.993486	7900000	7950000
OX359192.1	159	0.268333	0.280333	1.04859	1.05502	-0.012	0.316509	7950000	8000000
OX359192.1	160	0.170667	0.184333	0.904213	0.909752	-0.0136667	0.360468	8000000	8050000
OX359192.1	161	0.222667	0.280333	0.857293	0.862546	-0.0576667	1.521	8050000	8100000
OX359192.1	162	0.154667	0.182333	0.828863	0.833941	-0.0276667	0.729728	8100000	8150000
OX359192.1	163	0.28	0.352667	0.753289	0.757904	-0.0726667	1.91664	8150000	8200000
OX359192.1	164	0.293333	0.254333	1.23587	1.24344	0.039	-1.02865	8200000	8250000
OX359192.1	165	0.275	0.323333	1.14074	1.14773	-0.0483333	1.27483	8250000	8300000
OX359192.1	166	0.238667	0.272667	0.900711	0.906229	-0.034	0.896775	8300000	8350000
OX359192.1	167	0.389333	0.417	0.914925	0.920531	-0.0276667	0.729728	8350000	8400000
OX359192.1	168	0.363	0.477	0.764327	0.76901	-0.114	3.00683	8400000	8450000
OX359192.1	169	0.38	0.465333	0.838357	0.843494	-0.0853333	2.25073	8450000	8500000
OX359192.1	170	0.208333	0.289	0.753852	0.758471	-0.0806667	2.12764	8500000	8550000
OX359192.1	171	0.396	0.322667	1.21434	1.22178	0.0733333	-1.93422	8550000	8600000
OX359192.1	172	0.318	0.331	0.928781	0.934471	-0.013	0.342884	8600000	8650000
OX359192.1	173	0.214	0.300333	0.698687	0.702968	-0.0863333	2.2771	8650000	8700000
OX359192.1	174	0.215667	0.28	0.787789	0.792616	-0.0643333	1.69684	8700000	8750000
OX359192.1	175	0.259333	0.332667	0.8138	0.818786	-0.0733333	1.93422	8750000	8800000
OX359192.1	176	0.228333	0.268667	0.863974	0.869267	-0.0403333	1.06382	8800000	8850000
OX359192.1	177	0.172	0.178333	1.1605	1.16761	-0.00633333	0.167046	8850000	8900000
OX359192.1	178	0.237	0.26	0.97651	0.982492	-0.023	0.606642	8900000	8950000
OX359192.1	179	0.66	0.573333	1.15116	1.15822	0.0866667	-2.2859	8950000	8955000
OX359193.1	0	0.105417	0.16625	0.648519	0.652492	-0.0608333	1.60452	10000	50000
OX359193.1	1	0.153	0.183667	0.810985	0.815953	-0.0306667	0.808856	50000	100000
OX359193.1	2	0.187	0.173333	1.15883	1.16593	0.0136667	-0.360468	100000	150000
OX359193.1	3	0.196	0.267	0.763694	0.768373	-0.071	1.87268	150000	200000
OX359193.1	4	0.323333	0.256667	1.58358	1.59328	0.0666667	-1.75838	200000	250000
OX359193.1	5	0.242667	0.218	1.11112	1.11793	0.0246667	-0.650601	250000	300000
OX359193.1	6	0.241333	0.248333	0.958669	0.964542	-0.007	0.18463	300000	350000
OX359193.1	7	0.260667	0.244333	1.06369	1.07021	0.0163333	-0.430804	350000	400000
OX359193.1	8	0.278667	0.397333	0.712127	0.71649	-0.118667	3.12992	400000	450000
OX359193.1	9	0.252	0.246	1.01957	1.02582	0.006	-0.158254	450000	500000
OX359193.1	10	0.346333	0.367667	0.952363	0.958198	-0.0213333	0.562682	500000	550000
OX359193.1	11	0.37	0.395	0.945758	0.951553	-0.025	0.659393	550000	600000
OX359193.1	12	0.407333	0.339667	1.28605	1.29393	0.0676667	-1.78476	600000	650000
OX359193.1	13	0.26	0.249333	1.19953	1.20688	0.0106667	-0.281341	650000	700000
OX359193.1	14	0.261	0.304	0.734741	0.739242	-0.043	1.13416	700000	750000
OX359193.1	15	0.447333	0.560333	0.81026	0.815224	-0.113	2.98046	750000	800000
OX359193.1	16	0.328	0.383333	0.85922	0.864483	-0.0553333	1.45946	800000	850000
OX359193.1	17	0.369667	0.433333	0.859217	0.86448	-0.0636667	1.67925	850000	900000
OX359193.1	18	0.444333	0.449333	1.02559	1.03187	-0.005	0.131879	900000	950000
OX359193.1	19	0.525667	0.558	1.0776	1.08421	-0.0323333	0.852815	950000	1000000
OX359193.1	20	0.620333	0.648333	0.960065	0.965947	-0.028	0.73852	1000000	1050000
OX359193.1	21	0.303333	0.337	0.9108	0.91638	-0.0336667	0.887983	1050000	1100000
OX359193.1	22	0.429667	0.486333	0.936018	0.941753	-0.0566667	1.49462	1100000	1150000
OX359193.1	23	0.681667	0.753	0.984088	0.990117	-0.0713333	1.88147	1150000	1200000
OX359193.1	24	0.572333	0.566	0.988147	0.994201	0.00633333	-0.167046	1200000	1250000
OX359193.1	25	0.401333	0.456667	0.872698	0.878045	-0.0553333	1.45946	1250000	1300000
OX359193.1	26	0.402333	0.369333	1.06948	1.07603	0.033	-0.870399	1300000	1350000
OX359193.1	27	0.417333	0.546667	0.775688	0.78044	-0.129333	3.41126	1350000	1400000
OX359193.1	28	0.423	0.374667	1.2213	1.22878	0.0483333	-1.27483	1400000	1450000
OX359193.1	29	0.176333	0.259667	0.657304	0.661331	-0.0833333	2.19798	1450000	1500000
OX359193.1	30	0.409333	0.539333	0.734528	0.739028	-0.13	3.42884	1500000	1550000
OX359193.1	31	0.260333	0.372667	0.807887	0.812836	-0.112333	2.96287	1550000	1600000
OX359193.1	32	0.271333	0.311	0.880011	0.885402	-0.0396667	1.04624	1600000	1650000
OX359193.1	33	0.280667	0.387	0.718024	0.722423	-0.106333	2.80462	1650000	1700000
OX359193.1	34	0.418667	0.498333	0.904799	0.910342	-0.0796667	2.10127	1700000	1750000
OX359193.1	35	0.278333	0.406333	0.664292	0.668362	-0.128	3.37609	1750000	1800000
OX359193.1	36	0.292	0.39	0.748789	0.753376	-0.098	2.58482	1800000	1850000
OX359193.1	37	0.379333	0.369667	1.1133	1.12012	0.00966667	-0.254965	1850000	1900000
OX359193.1	38	0.411333	0.441333	0.970073	0.976016	-0.03	0.791272	1900000	1950000
OX359193.1	39	0.375333	0.414667	0.948688	0.9545	-0.0393333	1.03745	1950000	2000000
OX359193.1	40	0.473667	0.507333	0.931593	0.937301	-0.0336667	0.887983	2000000	2050000
OX359193.1	41	0.414	0.396667	1.07731	1.08391	0.0173333	-0.457179	2050000	2100000
OX359193.1	42	0.362333	0.313333	1.22622	1.23373	0.049	-1.29241	2100000	2150000
OX359193.1	43	0.358333	0.404	0.895445	0.90093	-0.0456667	1.20449	2150000	2200000
OX359193.1	44	0.264333	0.279667	1.1801	1.18733	-0.0153333	0.404428	2200000	2250000
OX359193.1	45	0.328333	0.440667	0.678783	0.682941	-0.112333	2.96287	2250000	2300000
OX359193.1	46	0.191333	0.207	0.91787	0.923493	-0.0156667	0.41322	2300000	2350000
OX359193.1	47	0.258	0.32	0.824241	0.829291	-0.062	1.6353	2350000	2400000
OX359193.1	48	0.30381	0.331905	0.908963	0.914532	-0.0280952	0.741032	2400000	2450000
OX359193.1	49	0.272667	0.383333	0.702743	0.707049	-0.110667	2.91891	2450000	2500000
OX359193.1	50	0.134333	0.181333	0.88979	0.895242	-0.047	1.23966	2500000	2550000
OX359193.1	51	0.232	0.253333	0.914725	0.920329	-0.0213333	0.562682	2550000	2600000
OX359193.1	52	0.238	0.235	1.13021	1.13714	0.003	-0.0791272	2600000	2650000
OX359193.1	53	0.154667	0.125333	1.30059	1.30856	0.0293333	-0.773688	2650000	2700000
OX359193.1	54	0.198	0.218333	0.886147	0.891576	-0.0203333	0.536306	2700000	2750000
OX359193.1	55	0.131	0.172667	0.748124	0.752707	-0.0416667	1.09899	2750000	2800000
OX359193.1	56	0.175	0.248667	0.696273	0.700539	-0.0736667	1.94301	2800000	2850000
OX359193.1	57	0.196333	0.226667	0.830615	0.835704	-0.0303333	0.800064	2850000	2900000
OX359193.1	58	0.0983333	0.160333	0.607232	0.610952	-0.062	1.6353	2900000	2950000
OX359193.1	59	0.209667	0.385	0.571611	0.575113	-0.175333	4.62454	2950000	3000000
OX359193.1	60	0.208	0.48	0.432397	0.435046	-0.272	7.1742	3000000	3050000
OX359193.1	61	0.172333	0.361667	0.470195	0.473076	-0.189333	4.9938	3050000	3100000
OX359193.1	62	0.206333	0.324667	0.596269	0.599922	-0.118333	3.12113	3100000	3150000
OX359193.1	63	0.213667	0.294667	0.737322	0.741839	-0.081	2.13643	3150000	3200000
OX359193.1	64	0.231667	0.282667	0.790752	0.795596	-0.051	1.34516	3200000	3250000
OX359193.1	65	0.146	0.207667	0.671038	0.675149	-0.0616667	1.6265	3250000	3300000
OX359193.1	66	0.248333	0.386667	0.642102	0.646036	-0.138333	3.64864	3300000	3350000
OX359193.1	67	0.115667	0.180333	0.680718	0.684888	-0.0646667	1.70563	3350000	3400000
OX359193.1	68	0.254667	0.354667	0.705004	0.709324	-0.1	2.63757	3400000	3450000
OX359193.1	69	0.392667	0.440667	1.1048	1.11157	-0.048	1.26603	3450000	3500000
OX359193.1	70	0.203667	0.259333	0.830226	0.835312	-0.0556667	1.46825	3500000	3550000
OX359193.1	71	0.168667	0.239333	0.797671	0.802557	-0.0706667	1.86388	3550000	3600000
OX359193.1	72	0.223	0.336667	0.622568	0.626382	-0.113667	2.99804	3600000	3650000
OX359193.1	73	0.153667	0.239333	0.624146	0.62797	-0.0856667	2.25952	3650000	3700000
OX359193.1	74	0.155667	0.268333	0.588575	0.59218	-0.112667	2.97167	3700000	3750000
OX359193.1	75	0.222	0.306	0.730843	0.735321	-0.084	2.21556	3750000	3800000
OX359193.1	76	0.265	0.389667	0.68763	0.691843	-0.124667	3.28817	3800000	3850000
OX359193.1	77	0.210333	0.276667	0.682027	0.686205	-0.0663333	1.74959	3850000	3900000
OX359193.1	78	0.382667	0.554	0.648999	0.652975	-0.171333	4.51904	3900000	3950000
OX359193.1	79	0.26	0.479	0.523056	0.52626	-0.219	5.77628	3950000	4000000
OX359193.1	80	0.242333	0.306667	0.699768	0.704055	-0.0643333	1.69684	4000000	4050000
OX359193.1	81	0.423667	0.431	1.10313	1.10989	-0.00733333	0.193422	4050000	4100000
OX359193.1	82	0.237667	0.296	0.874247	0.879603	-0.0583333	1.53858	4100000	4150000
OX359193.1	83	0.266	0.294667	0.8356	0.84072	-0.0286667	0.756104	4150000	4200000
OX359193.1	84	0.371667	0.334333	1.56406	1.57364	0.0373333	-0.984694	4200000	4250000
OX359193.1	85	0.364	0.391333	0.950767	0.956592	-0.0273333	0.720937	4250000	4300000
OX359193.1	86	0.405667	0.471667	0.943854	0.949637	-0.066	1.7408	4300000	4350000
OX359193.1	87	0.34	0.424333	0.799327	0.804224	-0.0843333	2.22435	4350000	4400000
OX359193.1	88	0.349	0.482333	0.699698	0.703985	-0.133333	3.51676	4400000	4450000
OX359193.1	89	0.276333	0.32	0.944559	0.950346	-0.0436667	1.15174	4450000	4500000
OX359193.1	90	0.215833	0.218333	0.937127	0.942868	-0.0025	0.0659393	4500000	4550000
OX359193.1	91	0.234286	0.291429	0.815887	0.820885	-0.0571429	1.50718	4550000	4585000
OX359193.1	92	0.197143	0.259524	0.715446	0.719829	-0.062381	1.64534	4615000	4650000
OX359193.1	93	0.223333	0.279	0.854345	0.859579	-0.0556667	1.46825	4650000	4700000
OX359193.1	94	0.297333	0.295667	1.00606	1.01223	0.00166667	-0.0439595	4700000	4750000
OX359193.1	95	0.515667	0.566333	0.88727	0.892706	-0.0506667	1.33637	4750000	4800000
OX359193.1	96	0.414	0.458	0.872806	0.878154	-0.044	1.16053	4800000	4850000
OX359193.1	97	0.279333	0.311	0.992568	0.998649	-0.0316667	0.835231	4850000	4900000
OX359193.1	98	0.368333	0.470667	0.834533	0.839646	-0.102333	2.69912	4900000	4950000
OX359193.1	99	0.491333	0.597667	0.830407	0.835494	-0.106333	2.80462	4950000	5000000
OX359193.1	100	0.325333	0.429667	0.755364	0.759991	-0.104333	2.75187	5000000	5050000
OX359193.1	101	0.225	0.328333	0.720145	0.724557	-0.103333	2.72549	5050000	5100000
OX359193.1	102	0.368667	0.310667	1.4068	1.41542	0.058	-1.52979	5100000	5150000
OX359193.1	103	0.395333	0.328667	1.29665	1.30459	0.0666667	-1.75838	5150000	5200000
OX359193.1	104	0.24	0.248333	1.02063	1.02688	-0.00833333	0.219798	5200000	5250000
OX359193.1	105	0.333	0.339	1.01902	1.02526	-0.006	0.158254	5250000	5300000
OX359193.1	106	0.288333	0.305333	0.962393	0.968289	-0.017	0.448387	5300000	5350000
OX359193.1	107	0.224333	0.286667	1.08753	1.09419	-0.0623333	1.64409	5350000	5400000
OX359193.1	108	0.404333	0.767667	0.544754	0.548091	-0.363333	9.58318	5400000	5450000
OX359193.1	109	0.309	0.341	0.985286	0.991322	-0.032	0.844023	5450000	5500000
OX359193.1	110	0.255333	0.229667	1.23231	1.23986	0.0256667	-0.676977	5500000	5550000
OX359193.1	111	0.331	0.321667	1.16603	1.17318	0.00933333	-0.246173	5550000	5600000
OX359193.1	112	0.463	0.338333	1.5628	1.57237	0.124667	-3.28817	5600000	5650000
OX359193.1	113	0.603333	0.500333	1.21962	1.2271	0.103	-2.7167	5650000	5700000
OX359193.1	114	0.524333	0.73	0.730453	0.734928	-0.205667	5.42461	5700000	5750000
OX359193.1	115	0.263333	0.242333	1.26181	1.26955	0.021	-0.55389	5750000	5800000
OX359193.1	116	0.23	0.274	1.11475	1.12158	-0.044	1.16053	5800000	5850000
OX359193.1	117	0.310333	0.53	0.575304	0.578828	-0.219667	5.79387	5850000	5900000
OX359193.1	118	0.223667	0.330333	0.777219	0.78198	-0.106667	2.81341	5900000	5950000
OX359193.1	119	0.333	0.359333	0.981113	0.987123	-0.0263333	0.694561	5950000	6000000
OX359193.1	120	0.306333	0.365333	0.857171	0.862422	-0.059	1.55617	6000000	6050000
OX359193.1	121	0.427	0.428333	1.02858	1.03488	-0.00133333	0.0351676	6050000	6100000
OX359193.1	122	0.341667	0.399	0.834345	0.839456	-0.0573333	1.51221	6100000	6150000
OX359193.1	123	0.453	0.496	0.915828	0.921439	-0.043	1.13416	6150000	6200000
OX359193.1	124	0.475333	0.549667	0.859617	0.864884	-0.0743333	1.9606	6200000	6250000
OX359193.1	125	0.633333	0.661	0.946923	0.952725	-0.0276667	0.729728	6250000	6300000
OX359193.1	126	0.335	0.274333	1.21898	1.22644	0.0606667	-1.60013	6300000	6350000
OX359193.1	127	0.260667	0.296	0.924028	0.929689	-0.0353333	0.931942	6350000	6400000
OX359193.1	128	0.506333	0.464667	1.11196	1.11877	0.0416667	-1.09899	6400000	6450000
OX359193.1	129	0.542667	0.412667	1.40325	1.41184	0.13	-3.42884	6450000	6500000
OX359193.1	130	0.376	0.386	1.10316	1.10992	-0.01	0.263757	6500000	6550000
OX359193.1	131	0.320333	0.299333	1.20874	1.21615	0.021	-0.55389	6550000	6600000
OX359193.1	132	0.328667	0.422333	0.81445	0.819439	-0.0936667	2.47053	6600000	6650000
OX359193.1	133	0.165333	0.216333	0.741527	0.74607	-0.051	1.34516	6650000	6700000
OX359193.1	134	0.313333	0.364333	0.841757	0.846914	-0.051	1.34516	6700000	6750000
OX359193.1	135	0.202333	0.198667	0.99562	1.00172	0.00366667	-0.096711	6750000	6800000
OX359193.1	136	0.180333	0.25	0.766609	0.771305	-0.0696667	1.83751	6800000	6850000
OX359193.1	137	0.141667	0.17	0.847653	0.852846	-0.0283333	0.747312	6850000	6900000
OX359193.1	138	0.218333	0.227667	1.1248	1.13169	-0.00933333	0.246173	6900000	6950000
OX359193.1	139	0.275333	0.251333	1.15477	1.16185	0.024	-0.633017	6950000	7000000
OX359193.1	140	0.304667	0.262	1.69639	1.70678	0.0426667	-1.12536	7000000	7050000
OX359193.1	141	0.315667	0.250333	1.35008	1.35835	0.0653333	-1.72321	7050000	7100000
OX359193.1	142	0.413	0.287667	1.55863	1.56817	0.125333	-3.30576	7100000	7150000
OX359193.1	143	0.210667	0.225333	0.989482	0.995544	-0.0146667	0.386844	7150000	7200000
OX359193.1	144	0.273333	0.273	1.0123	1.0185	0.000333333	-0.00879191	7200000	7250000
OX359193.1	145	0.230333	0.280333	0.849653	0.854859	-0.05	1.31879	7250000	7300000
OX359193.1	146	0.272667	0.262667	1.15693	1.16402	0.01	-0.263757	7300000	7350000
OX359193.1	147	0.229	0.196667	1.82504	1.83622	0.0323333	-0.852815	7350000	7400000
OX359193.1	148	0.169333	0.155667	1.593	1.60276	0.0136667	-0.360468	7400000	7450000
OX359193.1	149	0.159333	0.0756667	1.72374	1.73431	0.0836667	-2.20677	7450000	7500000
OX359193.1	150	0.209333	0.152333	2.00689	2.01919	0.057	-1.50342	7500000	7550000
OX359193.1	151	0.265	0.281333	0.983945	0.989973	-0.0163333	0.430804	7550000	7600000
OX359193.1	152	0.221	0.186333	1.28002	1.28786	0.0346667	-0.914359	7600000	7650000
OX359193.1	153	0.194667	0.203667	0.96024	0.966123	-0.009	0.237382	7650000	7700000
OX359193.1	154	0.181333	0.243667	0.740843	0.745381	-0.0623333	1.64409	7700000	7750000
OX359193.1	155	0.366667	0.429	0.853196	0.858423	-0.0623333	1.64409	7750000	7800000
OX359193.1	156	0.187	0.237667	0.804634	0.809563	-0.0506667	1.33637	7800000	7850000
OX359193.1	157	0.242333	0.34	0.71846	0.722861	-0.0976667	2.57603	7850000	7900000
OX359193.1	158	0.309333	0.415	0.726682	0.731134	-0.105667	2.78704	7900000	7950000
OX359193.1	159	0.136333	0.187	0.695049	0.699307	-0.0506667	1.33637	7950000	8000000
OX359193.1	160	0.072963	0.127407	0.519895	0.52308	-0.0544444	1.43601	8000000	8045000
OX359193.1	161	0.144667	0.242667	0.638289	0.6422	-0.098	2.58482	8050000	8100000
OX359193.1	162	0.264333	0.248333	1.1157	1.12254	0.016	-0.422012	8100000	8150000
OX359193.1	163	0.279	0.355667	0.866502	0.87181	-0.0766667	2.02214	8150000	8200000
OX359193.1	164	0.296667	0.394667	0.795126	0.799997	-0.098	2.58482	8200000	8250000
OX359193.1	165	0.145333	0.180333	0.85631	0.861556	-0.035	0.92315	8250000	8300000
OX359193.1	166	0.315	0.295667	1.13124	1.13818	0.0193333	-0.509931	8300000	8350000
OX359193.1	167	0.336333	0.321333	1.13508	1.14204	0.015	-0.395636	8350000	8400000
OX359193.1	168	0.515667	0.513	1.00375	1.0099	0.00266667	-0.0703353	8400000	8450000
OX359193.1	169	0.462333	0.481	1.04169	1.04807	-0.0186667	0.492347	8450000	8500000
OX359193.1	170	0.323667	0.334	0.934967	0.940695	-0.0103333	0.272549	8500000	8550000
OX359193.1	171	0.195	0.221	0.969378	0.975317	-0.026	0.685769	8550000	8600000
OX359193.1	172	0.278	0.357333	0.761143	0.765806	-0.0793333	2.09247	8600000	8650000
OX359193.1	173	0.179333	0.247	0.772173	0.776904	-0.0676667	1.78476	8650000	8700000
OX359193.1	174	0.183333	0.204667	1.12324	1.13013	-0.0213333	0.562682	8700000	8750000
OX359193.1	175	0.130667	0.142	0.935981	0.941715	-0.0113333	0.298925	8750000	8800000
OX359194.1	0	0.302	0.299667	1.20815	1.21556	0.00233333	-0.0615434	0	50000
OX359194.1	1	0.381	0.425	0.93111	0.936814	-0.044	1.16053	50000	100000
OX359194.1	2	0.381333	0.439667	0.921941	0.927589	-0.0583333	1.53858	100000	150000
OX359194.1	3	0.390333	0.501333	0.814118	0.819106	-0.111	2.92771	150000	200000
OX359194.1	4	0.528333	0.644	0.7875	0.792325	-0.115667	3.05079	200000	250000
OX359194.1	5	0.324333	0.451	0.717	0.721392	-0.126667	3.34093	250000	300000
OX359194.1	6	0.387667	0.383667	1.10121	1.10795	0.004	-0.105503	300000	350000
OX359194.1	7	0.477	0.384333	1.27657	1.28439	0.0926667	-2.44415	350000	400000
OX359194.1	8	0.265667	0.247	1.10096	1.1077	0.0186667	-0.492347	400000	450000
OX359194.1	9	0.330333	0.306667	1.06968	1.07624	0.0236667	-0.624226	450000	500000
OX359194.1	10	0.442	0.481667	1.09836	1.10509	-0.0396667	1.04624	500000	550000
OX359194.1	11	0.474333	0.490333	1.02058	1.02683	-0.016	0.422012	550000	600000
OX359194.1	12	0.519	0.577	0.890047	0.8955	-0.058	1.52979	600000	650000
OX359194.1	13	0.433	0.427	1.07341	1.07998	0.006	-0.158254	650000	700000
OX359194.1	14	0.501333	0.660333	0.825078	0.830133	-0.159	4.19374	700000	750000
OX359194.1	15	0.414333	0.43	1.00359	1.00974	-0.0156667	0.41322	750000	800000
OX359194.1	16	0.821	0.881667	0.945237	0.951028	-0.0606667	1.60013	800000	850000
OX359194.1	17	0.49	0.522667	1.08011	1.08672	-0.0326667	0.861607	850000	900000
OX359194.1	18	0.420667	0.57	0.674893	0.679027	-0.149333	3.93878	900000	950000
OX359194.1	19	0.527333	0.660333	0.788262	0.793091	-0.133	3.50797	950000	1000000
OX359194.1	20	0.554333	0.578333	0.919104	0.924735	-0.024	0.633017	1000000	1050000
OX359194.1	21	0.679333	0.7	0.949219	0.955034	-0.0206667	0.545098	1050000	1100000
OX359194.1	22	0.625333	0.677667	0.912466	0.918056	-0.0523333	1.38033	1100000	1150000
OX359194.1	23	0.449	0.615333	0.725572	0.730017	-0.166333	4.38716	1150000	1200000
OX359194.1	24	0.249333	0.320667	0.840448	0.845597	-0.0713333	1.88147	1200000	1250000
OX359194.1	25	0.417667	0.544667	0.773449	0.778188	-0.127	3.34972	1250000	1300000
OX359194.1	26	0.477333	0.577667	0.830988	0.836079	-0.100333	2.64636	1300000	1350000
OX359194.1	27	0.350333	0.339667	1.03111	1.03743	0.0106667	-0.281341	1350000	1400000
OX359194.1	28	0.276667	0.375	0.720342	0.724755	-0.0983333	2.59361	1400000	1450000
OX359194.1	29	0.265	0.396	0.690818	0.69505	-0.131	3.45522	1450000	1500000
OX359194.1	30	0.392333	0.598	0.66675	0.670835	-0.205667	5.42461	1500000	1550000
OX359194.1	31	0.555	0.755	0.734829	0.73933	-0.2	5.27515	1550000	1600000
OX359194.1	32	0.457	0.590667	0.758426	0.763072	-0.133667	3.52556	1600000	1650000
OX359194.1	33	0.275333	0.413667	0.656059	0.660079	-0.138333	3.64864	1650000	1700000
OX359194.1	34	0.352	0.547667	0.662017	0.666073	-0.195667	5.16085	1700000	1750000
OX359194.1	35	0.432667	0.587333	0.749605	0.754197	-0.154667	4.07945	1750000	1800000
OX359194.1	36	0.560333	0.752	0.757619	0.762261	-0.191667	5.05535	1800000	1850000
OX359194.1	37	0.556333	0.677667	0.853269	0.858496	-0.121333	3.20025	1850000	1900000
OX359194.1	38	0.516	0.647667	0.776428	0.781185	-0.131667	3.4728	1900000	1950000
OX359194.1	39	0.442	0.528333	0.845905	0.851087	-0.0863333	2.2771	1950000	2000000
OX359194.1	40	0.389	0.569333	0.735597	0.740104	-0.180333	4.75642	2000000	2050000
OX359194.1	41	0.375	0.629	0.610398	0.614138	-0.254	6.69943	2050000	2100000
OX359194.1	42	0.346667	0.529	0.645361	0.649315	-0.182333	4.80917	2100000	2150000
OX359194.1	43	0.346667	0.498	0.686524	0.690729	-0.151333	3.99153	2150000	2200000
OX359194.1	44	0.416667	0.580333	0.704745	0.709062	-0.163667	4.31683	2200000	2250000
OX359194.1	45	0.323333	0.408	0.794924	0.799794	-0.0846667	2.23314	2250000	2300000
OX359194.1	46	0.336667	0.535	0.617196	0.620977	-0.198333	5.23119	2300000	2350000
OX359194.1	47	0.642333	0.930667	0.695431	0.699692	-0.288333	7.605	2350000	2400000
OX359194.1	48	0.452667	0.597667	0.777724	0.782488	-0.145	3.82448	2400000	2450000
OX359194.1	49	0.352333	0.786667	0.438777	0.441466	-0.434333	11.4559	2450000	2500000
OX359194.1	50	0.202333	0.379333	0.670717	0.674826	-0.177	4.6685	2500000	2550000
OX359194.1	51	0.344	0.557	0.540666	0.543978	-0.213	5.61803	2550000	2600000
OX359194.1	52	0.379	0.615333	0.639094	0.64301	-0.236333	6.23346	2600000	2650000
OX359194.1	53	0.389333	0.438333	0.909205	0.914775	-0.049	1.29241	2650000	2700000
OX359194.1	54	0.295333	0.396	0.8376	0.842731	-0.100667	2.65516	2700000	2750000
OX359194.1	55	0.536	0.524333	1.62035	1.63028	0.0116667	-0.307717	2750000	2800000
OX359194.1	56	0.649333	0.853667	0.782765	0.78756	-0.204333	5.38944	2800000	2850000
OX359194.1	57	0.287333	0.342667	0.824136	0.829185	-0.0553333	1.45946	2850000	2900000
OX359194.1	58	0.460333	0.444667	1.10527	1.11204	0.0156667	-0.41322	2900000	2950000
OX359194.1	59	0.239667	0.332	1.8691	1.88055	-0.0923333	2.43536	2950000	3000000
OX359194.1	60	0.207667	0.431667	0.473308	0.476208	-0.224	5.90816	3000000	3050000
OX359194.1	61	0.0366667	0.103333	0.354839	0.357013	-0.0666667	1.75838	3050000	3055000
OX359194.1	62	0.0883333	0.32	0.270215	0.271871	-0.231667	6.11038	3120000	3150000
OX359194.1	63	0.343	0.307333	1.48977	1.4989	0.0356667	-0.940734	3150000	3200000
OX359194.1	64	0.258	0.262667	1.11667	1.12351	-0.00466667	0.123087	3200000	3250000
OX359194.1	65	0.261429	0.22381	1.67046	1.68069	0.037619	-0.99223	3255000	3300000
OX359194.1	66	0.36	0.255333	4.23721	4.26317	0.104667	-2.76066	3300000	3350000
OX359194.1	67	0.296667	0.387	0.759211	0.763863	-0.0903333	2.38261	3350000	3400000
OX359194.1	68	0.491333	0.546333	0.894888	0.900371	-0.055	1.45067	3400000	3450000
OX359194.1	69	0.371	0.384667	1.13237	1.13931	-0.0136667	0.360468	3450000	3500000
OX359194.1	70	0.437667	0.362333	1.34227	1.35049	0.0753333	-1.98697	3500000	3550000
OX359194.1	71	0.351333	0.379333	1.05886	1.06535	-0.028	0.73852	3550000	3600000
OX359194.1	72	0.339667	0.258	1.37659	1.38502	0.0816667	-2.15402	3600000	3650000
OX359194.1	73	0.298333	0.211333	1.42902	1.43778	0.087	-2.29469	3650000	3700000
OX359194.1	74	0.249667	0.179667	1.3785	1.38694	0.07	-1.8463	3700000	3750000
OX359194.1	75	0.219	0.223	1.28588	1.29376	-0.004	0.105503	3750000	3800000
OX359194.1	76	0.368333	0.256	2.53479	2.55032	0.112333	-2.96287	3800000	3850000
OX359194.1	77	0.253	0.217667	1.22836	1.23588	0.0353333	-0.931942	3850000	3900000
OX359194.1	78	0.153	0.152667	1.04136	1.04774	0.000333333	-0.00879191	3900000	3950000
OX359194.1	79	0.324333	0.504333	0.632707	0.636583	-0.18	4.74763	3950000	4000000
OX359194.1	80	0.436667	0.516	0.860215	0.865486	-0.0793333	2.09247	4000000	4050000
OX359194.1	81	0.272667	0.413	0.680816	0.684987	-0.140333	3.70139	4050000	4100000
OX359194.1	82	0.245667	0.374333	0.687865	0.692079	-0.128667	3.39368	4100000	4150000
OX359194.1	83	0.255333	0.412667	0.610866	0.614609	-0.157333	4.14978	4150000	4200000
OX359194.1	84	0.13	0.209	0.51329	0.516435	-0.079	2.08368	4200000	4250000
OX359194.1	85	0.265667	0.403333	0.64814	0.65211	-0.137667	3.63106	4250000	4300000
OX359194.1	86	0.334333	0.451667	0.763732	0.768411	-0.117333	3.09475	4300000	4350000
OX359194.1	87	0.242667	0.376667	0.629301	0.633156	-0.134	3.53435	4350000	4400000
OX359194.1	88	0.284333	0.449	0.626489	0.630327	-0.164667	4.3432	4400000	4450000
OX359194.1	89	0.283333	0.377333	0.742364	0.746912	-0.094	2.47932	4450000	4500000
OX359194.1	90	0.338667	0.417667	0.786697	0.791517	-0.079	2.08368	4500000	4550000
OX359194.1	91	0.341667	0.458	0.739539	0.74407	-0.116333	3.06838	4550000	4600000
OX359194.1	92	0.365333	0.501	0.754529	0.759152	-0.135667	3.57831	4600000	4650000
OX359194.1	93	0.255	0.346	0.695255	0.699515	-0.091	2.40019	4650000	4700000
OX359194.1	94	0.21	0.227	0.940164	0.945924	-0.017	0.448387	4700000	4750000
OX359194.1	95	0.222667	0.206	1.21958	1.22705	0.0166667	-0.439595	4750000	4800000
OX359194.1	96	0.169333	0.140667	4.41064	4.43766	0.0286667	-0.756104	4800000	4850000
OX359194.1	97	0.364	0.417	0.918095	0.92372	-0.053	1.39791	4850000	4900000
OX359194.1	98	0.381333	0.370333	1.07134	1.0779	0.011	-0.290133	4900000	4950000
OX359194.1	99	0.521333	0.448667	1.2076	1.215	0.0726667	-1.91664	4950000	5000000
OX359194.1	100	0.430667	0.467667	0.878242	0.883623	-0.037	0.975902	5000000	5050000
OX359194.1	101	0.39	0.358	1.13269	1.13963	0.032	-0.844023	5050000	5100000
OX359194.1	102	0.531667	0.518	1.05558	1.06204	0.0136667	-0.360468	5100000	5150000
OX359194.1	103	0.549	0.548	1.01872	1.02496	0.001	-0.0263757	5150000	5200000
OX359194.1	104	0.722667	0.617	1.15585	1.16293	0.105667	-2.78704	5200000	5250000
OX359194.1	105	0.34	0.471667	0.734164	0.738662	-0.131667	3.4728	5250000	5300000
OX359194.1	106	0.409333	0.496667	0.843226	0.848392	-0.0873333	2.30348	5300000	5350000
OX359194.1	107	0.511333	0.654667	0.805512	0.810447	-0.143333	3.78052	5350000	5400000
OX359194.1	108	0.279	0.503667	0.572189	0.575694	-0.224667	5.92575	5400000	5450000
OX359194.1	109	0.393333	0.614667	0.633326	0.637206	-0.221333	5.83783	5450000	5500000
OX359194.1	110	0.313333	0.545333	0.56606	0.569528	-0.232	6.11917	5500000	5550000
OX359194.1	111	0.301667	0.423333	0.750197	0.754793	-0.121667	3.20905	5550000	5600000
OX359194.1	112	0.375	0.458	0.859213	0.864477	-0.083	2.18919	5600000	5650000
OX359194.1	113	0.392333	0.491667	0.830859	0.83595	-0.0993333	2.61999	5650000	5700000
OX359194.1	114	0.481333	0.591333	0.782102	0.786893	-0.11	2.90133	5700000	5750000
OX359194.1	115	0.675	0.692	0.976656	0.98264	-0.017	0.448387	5750000	5800000
OX359194.1	116	0.756667	0.847667	0.908849	0.914417	-0.091	2.40019	5800000	5850000
OX359194.1	117	0.414667	0.348333	1.2919	1.29982	0.0663333	-1.74959	5850000	5900000
OX359194.1	118	0.271	0.343	0.733067	0.737558	-0.072	1.89905	5900000	5950000
OX359194.1	119	0.347667	0.422	0.85365	0.85888	-0.0743333	1.9606	5950000	6000000
OX359194.1	120	0.402333	0.555	0.694907	0.699165	-0.152667	4.02669	6000000	6050000
OX359194.1	121	0.238667	0.268	0.704951	0.70927	-0.0293333	0.773688	6050000	6100000
OX359194.1	122	0.109	0.144	0.784607	0.789414	-0.035	0.92315	6100000	6150000
OX359194.1	123	0.401333	0.468667	0.863662	0.868953	-0.0673333	1.77597	6150000	6200000
OX359194.1	124	0.489167	0.5625	0.876512	0.881882	-0.0733333	1.93422	6200000	6240000
OX359194.1	125	0.2	0.2	0.693256	0.697503	-3.46945e-18	1.11022e-16	6250000	6300000
OX359194.1	126	0.508	0.520667	0.989407	0.995468	-0.0126667	0.334093	6300000	6350000
OX359194.1	127	0.155667	0.239333	0.604721	0.608425	-0.0836667	2.20677	6350000	6400000
OX359194.1	128	0.269667	0.394333	0.685955	0.690158	-0.124667	3.28817	6400000	6450000
OX359194.1	129	0.338	0.372	0.911111	0.916693	-0.034	0.896775	6450000	6500000
OX359194.1	130	0.341333	0.372333	0.885633	0.891059	-0.031	0.817648	6500000	6550000
OX359194.1	131	0.322667	0.403	0.772246	0.776977	-0.0803333	2.11885	6550000	6600000
OX359194.1	132	0.631667	0.647667	0.997681	1.00379	-0.016	0.422012	6600000	6650000
OX359194.1	133	0.329333	0.439	0.709898	0.714248	-0.109667	2.89254	6650000	6700000
OX359194.1	134	0.436	0.448667	1.00223	1.00837	-0.0126667	0.334093	6700000	6750000
OX359194.1	135	0.445667	0.453667	1.08254	1.08917	-0.008	0.211006	6750000	6800000
OX359194.1	136	0.419667	0.461667	0.918402	0.924028	-0.042	1.10778	6800000	6850000
OX359194.1	137	0.193	0.228	0.864495	0.869791	-0.035	0.92315	6850000	6900000
OX359194.1	138	0.439667	0.237667	3.91986	3.94388	0.202	-5.3279	6900000	6950000
OX359194.1	139	0.485	0.343667	1.51664	1.52593	0.141333	-3.72777	6950000	7000000
OX359194.1	140	0.338333	0.32	1.07227	1.07884	0.0183333	-0.483555	7000000	7050000
OX359194.1	141	0.294	0.271	1.09538	1.10209	0.023	-0.606642	7050000	7100000
OX359194.1	142	0.152333	0.11	1.49081	1.49994	0.0423333	-1.11657	7100000	7150000
OX359194.1	143	0.226	0.263667	0.871774	0.877115	-0.0376667	0.993486	7150000	7200000
OX359194.1	144	0.227	0.244667	0.983018	0.98904	-0.0176667	0.465971	7200000	7250000
OX359194.1	145	0.129333	0.190667	0.69305	0.697296	-0.0613333	1.61771	7250000	7300000
OX359194.1	146	0.344	0.229667	1.58504	1.59475	0.114333	-3.01562	7300000	7350000
OX359194.1	147	0.170333	0.108667	1.58599	1.5957	0.0616667	-1.6265	7350000	7400000
OX359194.1	148	0.197	0.234333	0.83905	0.84419	-0.0373333	0.984694	7400000	7450000
OX359194.1	149	0.228	0.195333	1.29588	1.30382	0.0326667	-0.861607	7450000	7500000
OX359194.1	150	0.269667	0.331667	0.911772	0.917358	-0.062	1.6353	7500000	7550000
OX359194.1	151	0.252667	0.271	0.934838	0.940565	-0.0183333	0.483555	7550000	7600000
OX359194.1	152	0.223333	0.184333	1.55492	1.56445	0.039	-1.02865	7600000	7650000
OX359194.1	153	0.160667	0.175667	0.885124	0.890547	-0.015	0.395636	7650000	7700000
OX359194.1	154	0.147	0.190333	0.773355	0.778093	-0.0433333	1.14295	7700000	7750000
OX359194.1	155	0.253	0.213667	1.4679	1.47689	0.0393333	-1.03745	7750000	7800000
OX359194.1	156	0.393333	0.281667	1.52323	1.53256	0.111667	-2.94529	7800000	7850000
OX359194.1	157	0.524	0.473333	1.12258	1.12946	0.0506667	-1.33637	7850000	7900000
OX359194.1	158	0.392333	0.416667	1.00169	1.00783	-0.0243333	0.641809	7900000	7950000
OX359194.1	159	0.263667	0.264333	0.996603	1.00271	-0.000666667	0.0175838	7950000	8000000
OX359194.1	160	0.269667	0.286667	1.00317	1.00931	-0.017	0.448387	8000000	8050000
OX359194.1	161	0.281333	0.286	1.02703	1.03332	-0.00466667	0.123087	8050000	8100000
OX359194.1	162	0.582667	0.693	0.851932	0.857151	-0.110333	2.91012	8100000	8150000
OX359194.1	163	0.518	0.715333	0.700856	0.70515	-0.197333	5.20481	8150000	8200000
OX359194.1	164	0.459	0.497667	0.954466	0.960314	-0.0386667	1.01986	8200000	8250000
OX359194.1	165	0.267667	0.292667	0.916605	0.922221	-0.025	0.659393	8250000	8300000
OX359194.1	166	0.219333	0.216	1.02802	1.03431	0.00333333	-0.0879191	8300000	8350000
OX359194.1	167	0.237667	0.307667	0.827799	0.832871	-0.07	1.8463	8350000	8400000
OX359194.1	168	0.264333	0.273667	0.966531	0.972453	-0.00933333	0.246173	8400000	8450000
OX359194.1	169	0.492333	0.519667	1.07523	1.08182	-0.0273333	0.720937	8450000	8500000
OX359194.1	170	0.546667	0.633333	0.898354	0.903858	-0.0866667	2.2859	8500000	8550000
OX359194.1	171	0.605	0.620667	0.96541	0.971324	-0.0156667	0.41322	8550000	8600000
OX359194.1	172	0.319333	0.352333	0.914288	0.91989	-0.033	0.870399	8600000	8650000
OX359194.1	173	0.249667	0.234667	0.994361	1.00045	0.015	-0.395636	8650000	8700000
OX359194.1	174	0.155556	0.172778	0.887827	0.893267	-0.0172222	0.454249	8700000	8730000
OX359195.1	0	0.442667	0.416333	1.0797	1.08631	0.0263333	-0.694561	0	50000
OX359195.1	1	0.446667	0.51	0.864862	0.87016	-0.0633333	1.67046	50000	100000
OX359195.1	2	0.686	0.698	0.998275	1.00439	-0.012	0.316509	100000	150000
OX359195.1	3	0.383	0.431	0.929492	0.935187	-0.048	1.26603	150000	200000
OX359195.1	4	0.466333	0.604667	0.785832	0.790646	-0.138333	3.64864	200000	250000
OX359195.1	5	0.397667	0.597	0.658083	0.662115	-0.199333	5.25756	250000	300000
OX359195.1	6	0.503333	0.532333	0.948465	0.954276	-0.029	0.764896	300000	350000
OX359195.1	7	0.522667	0.570667	0.944278	0.950063	-0.048	1.26603	350000	400000
OX359195.1	8	0.459	0.535	0.915833	0.921444	-0.076	2.00456	400000	450000
OX359195.1	9	0.682667	0.627333	1.08786	1.09452	0.0553333	-1.45946	450000	500000
OX359195.1	10	0.265556	0.208889	1.23027	1.2378	0.0566667	-1.49462	500000	515000
OX359195.1	11	0.0788889	0.0961111	0.509639	0.512762	-0.0172222	0.454249	550000	580000
OX359195.1	12	0.398333	0.398333	0.963264	0.969165	2.31263e-17	-5.92047e-16	620000	650000
OX359195.1	13	0.449	0.574	0.804548	0.809477	-0.125	3.29697	650000	700000
OX359195.1	14	0.377667	0.533333	0.772003	0.776733	-0.155667	4.10582	700000	750000
OX359195.1	15	0.582667	0.718333	0.807298	0.812243	-0.135667	3.57831	750000	800000
OX359195.1	16	0.540333	0.773667	0.70575	0.710073	-0.233333	6.15434	800000	850000
OX359195.1	17	0.478667	0.569	0.874818	0.880177	-0.0903333	2.38261	850000	900000
OX359195.1	18	0.197333	0.382667	0.495708	0.498745	-0.185333	4.8883	900000	950000
OX359195.1	19	0.171667	0.315667	0.548226	0.551585	-0.144	3.7981	950000	1000000
OX359195.1	20	0.141852	0.297407	0.596697	0.600352	-0.155556	4.10289	1000000	1050000
OX359195.1	21	0.203333	0.404667	0.504668	0.50776	-0.201333	5.31031	1050000	1100000
OX359195.1	22	0.244	0.441333	0.525825	0.529046	-0.197333	5.20481	1100000	1150000
OX359195.1	23	0.168667	0.368667	0.455087	0.457875	-0.2	5.27515	1150000	1200000
OX359195.1	24	0.182333	0.403333	0.428092	0.430715	-0.221	5.82904	1200000	1250000
OX359195.1	25	0.263333	0.512	0.510646	0.513774	-0.248667	6.55876	1250000	1300000
OX359195.1	26	0.194333	0.396333	0.448021	0.450766	-0.202	5.3279	1300000	1350000
OX359195.1	27	0.383704	0.512222	0.690091	0.694319	-0.128519	3.38977	1350000	1395000
OX359195.1	28	0.548333	0.591333	0.751047	0.755648	-0.043	1.13416	1400000	1450000
OX359195.1	29	0.478	0.528333	0.925967	0.93164	-0.0503333	1.32758	1450000	1500000
OX359195.1	30	0.524	0.501333	1.20682	1.21422	0.0226667	-0.59785	1500000	1550000
OX359195.1	31	0.365667	0.402	0.942484	0.948258	-0.0363333	0.958318	1550000	1600000
OX359195.1	32	0.814	0.777667	1.0765	1.0831	0.0363333	-0.958318	1600000	1650000
OX359195.1	33	0.298333	0.383667	0.728911	0.733377	-0.0853333	2.25073	1650000	1700000
OX359195.1	34	0.465667	0.486667	0.986349	0.992391	-0.021	0.55389	1700000	1750000
OX359195.1	35	0.643	0.826333	0.769528	0.774242	-0.183333	4.83555	1750000	1800000
OX359195.1	36	0.511333	0.545333	1.00897	1.01515	-0.034	0.896775	1800000	1850000
OX359195.1	37	0.52	0.68	0.76875	0.773459	-0.16	4.22012	1850000	1900000
OX359195.1	38	0.466667	0.467667	1.00701	1.01318	-0.001	0.0263757	1900000	1950000
OX359195.1	39	0.426333	0.545	0.826405	0.831467	-0.118667	3.12992	1950000	2000000
OX359195.1	40	0.423	0.444667	0.911112	0.916694	-0.0216667	0.571474	2000000	2050000
OX359195.1	41	0.362	0.481333	0.838816	0.843955	-0.119333	3.1475	2050000	2100000
OX359195.1	42	0.321481	0.24037	1.83004	1.84125	0.0811111	-2.13936	2100000	2150000
OX359195.1	43	0.104333	0.166	0.566793	0.570265	-0.0616667	1.6265	2150000	2200000
OX359195.1	44	0.126	0.182667	0.68994	0.694167	-0.0566667	1.49462	2200000	2250000
OX359195.1	45	0.145667	0.216667	0.643484	0.647426	-0.071	1.87268	2250000	2300000
OX359195.1	46	0.212333	0.243	0.977885	0.983876	-0.0306667	0.808856	2300000	2350000
OX359195.1	47	0.374667	0.47	0.75021	0.754806	-0.0953333	2.51449	2350000	2400000
OX359195.1	48	0.19	0.355667	0.546188	0.549535	-0.165667	4.36958	2400000	2450000
OX359195.1	49	0.263667	0.432333	0.631631	0.635501	-0.168667	4.44871	2450000	2500000
OX359195.1	50	0.09	0.191	0.368767	0.371026	-0.101	2.66395	2500000	2550000
OX359195.1	51	0.200667	0.247333	1.04265	1.04904	-0.0466667	1.23087	2550000	2600000
OX359195.1	52	0.130667	0.268667	0.496998	0.500043	-0.138	3.63985	2600000	2650000
OX359195.1	53	0.29	0.427667	0.709615	0.713962	-0.137667	3.63106	2650000	2700000
OX359195.1	54	0.216333	0.328667	0.617709	0.621494	-0.112333	2.96287	2700000	2750000
OX359195.1	55	0.644	0.541333	1.36182	1.37017	0.102667	-2.70791	2750000	2800000
OX359195.1	56	0.486667	0.559667	0.866768	0.872078	-0.073	1.92543	2800000	2850000
OX359195.1	57	0.567667	0.619333	0.965499	0.971414	-0.0516667	1.36275	2850000	2900000
OX359195.1	58	0.518667	0.664667	0.771887	0.776616	-0.146	3.85086	2900000	2950000
OX359195.1	59	0.383667	0.514	0.779448	0.784224	-0.130333	3.43764	2950000	3000000
OX359195.1	60	0.405333	0.533333	0.738144	0.742666	-0.128	3.37609	3000000	3050000
OX359195.1	61	0.242667	0.328	0.758872	0.763521	-0.0853333	2.25073	3050000	3100000
OX359195.1	62	0.151667	0.185333	0.860236	0.865506	-0.0336667	0.887983	3100000	3150000
OX359195.1	63	0.284	0.318	0.909744	0.915318	-0.034	0.896775	3150000	3200000
OX359195.1	64	0.0876667	0.125333	0.819227	0.824246	-0.0376667	0.993486	3200000	3250000
OX359195.1	65	0.140667	0.205	0.662133	0.666189	-0.0643333	1.69684	3250000	3300000
OX359195.1	66	0.165	0.267	0.623048	0.626865	-0.102	2.69032	3300000	3350000
OX359195.1	67	0.127333	0.195	0.678785	0.682944	-0.0676667	1.78476	3350000	3400000
OX359195.1	68	0.0636667	0.087	0.576949	0.580484	-0.0233333	0.615434	3400000	3450000
OX359195.1	69	0.0146667	0.064	0.502349	0.505426	-0.0493333	1.3012	3450000	3500000
OX359195.1	70	0.0126667	0.0406667	0.285299	0.287047	-0.028	0.73852	3500000	3550000
OX359195.1	71	0.036	0.117667	0.2924	0.294191	-0.0816667	2.15402	3550000	3600000
OX359195.1	72	0.077	0.2	0.431914	0.434561	-0.123	3.24421	3600000	3650000
OX359195.1	73	0.0603333	0.149333	0.32879	0.330804	-0.089	2.34744	3650000	3700000
OX359195.1	74	0.0516667	0.061	1.32563	1.33375	-0.00933333	0.246173	3700000	3750000
OX359195.1	75	0.121111	0.168889	0.63793	0.641838	-0.0477778	1.26017	3750000	3800000
OX359195.1	76	0.231333	0.309	0.681303	0.685477	-0.0776667	2.04851	3800000	3850000
OX359195.1	77	0.365	0.467667	0.762137	0.766806	-0.102667	2.70791	3850000	3900000
OX359195.1	78	0.264333	0.314	0.872573	0.877918	-0.0496667	1.30999	3900000	3950000
OX359195.1	79	0.05375	0.0475	1.20833	1.21574	0.00625	-0.164848	3950000	3995000
OX359195.1	80	0.057	0.074	1.0056	1.01176	-0.017	0.448387	4000000	4050000
OX359195.1	81	0.207	0.244333	0.616268	0.620043	-0.0373333	0.984694	4050000	4100000
OX359195.1	82	0.137333	0.175	0.777827	0.782593	-0.0376667	0.993486	4100000	4150000
OX359195.1	83	0.348667	0.463	0.732511	0.736999	-0.114333	3.01562	4150000	4200000
OX359195.1	84	0.246	0.346667	0.696502	0.700769	-0.100667	2.65516	4200000	4250000
OX359195.1	85	0.118	0.193667	0.616263	0.620039	-0.0756667	1.99576	4250000	4300000
OX359195.1	86	0.31	0.337333	0.912387	0.917977	-0.0273333	0.720937	4300000	4350000
OX359195.1	87	0.116333	0.152667	0.701667	0.705966	-0.0363333	0.958318	4350000	4400000
OX359195.1	88	0.214	0.210667	1.0243	1.03057	0.00333333	-0.0879191	4400000	4450000
OX359195.1	89	0.201667	0.184	1.09414	1.10084	0.0176667	-0.465971	4450000	4500000
OX359195.1	90	0.134667	0.215667	0.656614	0.660637	-0.081	2.13643	4500000	4550000
OX359195.1	91	0.268667	0.287333	0.937908	0.943654	-0.0186667	0.492347	4550000	4600000
OX359195.1	92	0.313	0.338667	0.918141	0.923766	-0.0256667	0.676977	4600000	4650000
OX359195.1	93	0.396667	0.480667	0.868708	0.87403	-0.084	2.21556	4650000	4700000
OX359195.1	94	0.256333	0.282667	0.944906	0.950695	-0.0263333	0.694561	4700000	4750000
OX359195.1	95	0.500333	0.507333	1.0706	1.07716	-0.007	0.18463	4750000	4800000
OX359195.1	96	0.605333	0.485667	1.11761	1.12446	0.119667	-3.1563	4800000	4850000
OX359195.1	97	0.585667	0.519333	1.1037	1.11046	0.0663333	-1.74959	4850000	4900000
OX359195.1	98	0.338333	0.418	0.832382	0.837482	-0.0796667	2.10127	4900000	4950000
OX359195.1	99	0.391	0.471333	0.712375	0.716739	-0.0803333	2.11885	4950000	5000000
OX359195.1	100	0.647667	0.736333	0.803586	0.808509	-0.0886667	2.33865	5000000	5050000
OX359195.1	101	0.296667	0.333333	1.06117	1.06767	-0.0366667	0.96711	5050000	5100000
OX359195.1	102	0.401667	0.241667	1.84696	1.85828	0.16	-4.22012	5100000	5150000
OX359195.1	103	0.441667	0.410667	1.08023	1.08684	0.031	-0.817648	5150000	5200000
OX359195.1	104	0.455	0.479667	0.983369	0.989393	-0.0246667	0.650601	5200000	5250000
OX359195.1	105	0.592	0.467667	1.41567	1.42434	0.124333	-3.27938	5250000	5300000
OX359195.1	106	0.359	0.337667	1.17301	1.18019	0.0213333	-0.562682	5300000	5350000
OX359195.1	107	0.346	0.307	1.18335	1.1906	0.039	-1.02865	5350000	5400000
OX359195.1	108	0.506333	0.579	0.907083	0.91264	-0.0726667	1.91664	5400000	5450000
OX359195.1	109	0.529667	0.579333	0.917436	0.923057	-0.0496667	1.30999	5450000	5500000
OX359195.1	110	0.498	0.566	0.911162	0.916744	-0.068	1.79355	5500000	5550000
OX359195.1	111	0.336333	0.478	0.742026	0.746572	-0.141667	3.73656	5550000	5600000
OX359195.1	112	0.433	0.325	1.37279	1.3812	0.108	-2.84858	5600000	5650000
OX359195.1	113	0.252667	0.257	1.0156	1.02182	-0.00433333	0.114295	5650000	5700000
OX359195.1	114	0.395	0.421333	0.922734	0.928387	-0.0263333	0.694561	5700000	5750000
OX359195.1	115	0.439	0.540667	0.842461	0.847622	-0.101667	2.68153	5750000	5800000
OX359195.1	116	0.399333	0.38	1.22233	1.22982	0.0193333	-0.509931	5800000	5850000
OX359195.1	117	0.217333	0.228	0.930778	0.936481	-0.0106667	0.281341	5850000	5900000
OX359195.1	118	0.434333	0.465	0.90071	0.906228	-0.0306667	0.808856	5900000	5950000
OX359195.1	119	0.299667	0.343	0.945475	0.951267	-0.0433333	1.14295	5950000	6000000
OX359195.1	120	0.241333	0.315667	0.564544	0.568003	-0.0743333	1.9606	6000000	6050000
OX359195.1	121	0.113	0.173333	0.60157	0.605256	-0.0603333	1.59134	6050000	6100000
OX359195.1	122	0.229667	0.285333	0.763325	0.768002	-0.0556667	1.46825	6100000	6150000
OX359195.1	123	0.258	0.351667	0.704926	0.709245	-0.0936667	2.47053	6150000	6200000
OX359195.1	124	0.156667	0.191667	0.776236	0.780992	-0.035	0.92315	6200000	6250000
OX359195.1	125	0.277	0.274333	1.02805	1.03434	0.00266667	-0.0703353	6250000	6300000
OX359195.1	126	0.27	0.353	0.803844	0.808768	-0.083	2.18919	6300000	6350000
OX359195.1	127	0.561333	0.753667	0.773382	0.77812	-0.192333	5.07293	6350000	6400000
OX359195.1	128	0.534333	0.645	0.860342	0.865613	-0.110667	2.91891	6400000	6450000
OX359195.1	129	0.31	0.346667	0.915155	0.920762	-0.0366667	0.96711	6450000	6500000
OX359195.1	130	0.267333	0.249	1.16529	1.17243	0.0183333	-0.483555	6500000	6550000
OX359195.1	131	0.439	0.556	0.824198	0.829248	-0.117	3.08596	6550000	6600000
OX359195.1	132	0.457	0.403	1.33893	1.34713	0.054	-1.42429	6600000	6650000
OX359195.1	133	0.345667	0.547	0.766879	0.771577	-0.201333	5.31031	6650000	6700000
OX359195.1	134	0.305333	0.474333	0.701782	0.706082	-0.169	4.4575	6700000	6750000
OX359195.1	135	0.368	0.290333	1.3759	1.38433	0.0776667	-2.04851	6750000	6800000
OX359195.1	136	0.343667	0.225	1.67382	1.68408	0.118667	-3.12992	6800000	6850000
OX359195.1	137	0.303333	0.249667	1.30766	1.31567	0.0536667	-1.4155	6850000	6900000
OX359195.1	138	0.33963	0.288148	1.34625	1.3545	0.0514815	-1.35786	6900000	6950000
OX359195.1	139	0.551333	0.625667	0.904854	0.910398	-0.0743333	1.9606	6950000	7000000
OX359195.1	140	0.330667	0.456	0.777575	0.782339	-0.125333	3.30576	7000000	7050000
OX359195.1	141	0.328333	0.374	0.895649	0.901137	-0.0456667	1.20449	7050000	7100000
OX359195.1	142	0.468	0.496667	1.04432	1.05072	-0.0286667	0.756104	7100000	7150000
OX359195.1	143	0.525667	0.577667	1.26234	1.27007	-0.052	1.37154	7150000	7200000
OX359195.1	144	0.357333	0.392	0.942623	0.948398	-0.0346667	0.914359	7200000	7250000
OX359195.1	145	0.373	0.445333	0.876587	0.881958	-0.0723333	1.90784	7250000	7300000
OX359195.1	146	0.193333	0.289333	0.686698	0.690905	-0.096	2.53207	7300000	7350000
OX359195.1	147	0.336	0.485667	0.796452	0.801331	-0.149667	3.94757	7350000	7400000
OX359195.1	148	0.432333	0.609	0.713841	0.718214	-0.176667	4.65971	7400000	7450000
OX359195.1	149	0.232667	0.316333	0.794353	0.799219	-0.0836667	2.20677	7450000	7500000
OX359195.1	150	0.293667	0.449	0.669063	0.673162	-0.155333	4.09703	7500000	7550000
OX359195.1	151	0.293333	0.368333	0.863392	0.868682	-0.075	1.97818	7550000	7600000
OX359195.1	152	0.304667	0.246667	1.24935	1.25701	0.058	-1.52979	7600000	7650000
OX359195.1	153	0.282083	0.299583	0.771635	0.776362	-0.0175	0.461575	7650000	7700000
OX359195.1	154	0.105667	0.111333	0.97826	0.984253	-0.00566667	0.149462	7700000	7750000
OX359195.1	155	0.352	0.391333	0.904534	0.910076	-0.0393333	1.03745	7750000	7800000
OX359195.1	156	0.304	0.444333	0.667019	0.671106	-0.140333	3.70139	7800000	7850000
OX359195.1	157	0.442	0.451333	0.978797	0.984793	-0.00933333	0.246173	7850000	7900000
OX359195.1	158	0.578333	0.594	1.01172	1.01791	-0.0156667	0.41322	7900000	7950000
OX359195.1	159	0.524	0.568667	0.984881	0.990914	-0.0446667	1.17812	7950000	8000000
OX359195.1	160	0.117667	0.121667	0.914432	0.920035	-0.004	0.105503	8000000	8050000
OX359195.1	161	0.312667	0.175333	1.84025	1.85153	0.137333	-3.62227	8050000	8100000
OX359195.1	162	0.343	0.293	1.9241	1.93589	0.05	-1.31879	8100000	8150000
OX359195.1	163	0.387333	0.366	1.31048	1.31851	0.0213333	-0.562682	8150000	8200000
OX359195.1	164	0.281667	0.213333	1.32179	1.32989	0.0683333	-1.80234	8200000	8250000
OX359195.1	165	0.303667	0.258333	1.24455	1.25217	0.0453333	-1.1957	8250000	8300000
OX359195.1	166	0.348333	0.303667	1.17785	1.18507	0.0446667	-1.17812	8300000	8350000
OX359195.1	167	0.408667	0.312667	1.15376	1.16082	0.096	-2.53207	8350000	8400000
OX359195.1	168	0.357	0.217667	1.58946	1.5992	0.139333	-3.67502	8400000	8450000
OX359195.1	169	0	0	0	0	0	0	8450000	8455000
OX359196.1	0	0.206667	0.264667	0.748387	0.752972	-0.058	1.52979	0	50000
OX359196.1	1	0.167667	0.228667	0.776246	0.781001	-0.061	1.60892	50000	100000
OX359196.1	2	0.235333	0.25	1.12436	1.13125	-0.0146667	0.386844	100000	150000
OX359196.1	3	0.298667	0.343	0.950852	0.956677	-0.0443333	1.16932	150000	200000
OX359196.1	4	0.328	0.367	0.930257	0.935956	-0.039	1.02865	200000	250000
OX359196.1	5	0.314333	0.376	0.906875	0.912431	-0.0616667	1.6265	250000	300000
OX359196.1	6	0.571333	0.599	0.941232	0.946999	-0.0276667	0.729728	300000	350000
OX359196.1	7	0.403333	0.340333	1.29593	1.30386	0.063	-1.66167	350000	400000
OX359196.1	8	0.36	0.496	0.753874	0.758492	-0.136	3.5871	400000	450000
OX359196.1	9	0.307667	0.298333	0.946736	0.952536	0.00933333	-0.246173	450000	500000
OX359196.1	10	0.507	0.516667	0.972405	0.978362	-0.00966667	0.254965	500000	550000
OX359196.1	11	0.419667	0.415	1.10836	1.11515	0.00466667	-0.123087	550000	600000
OX359196.1	12	0.238333	0.324667	0.760628	0.765288	-0.0863333	2.2771	600000	650000
OX359196.1	13	0.317667	0.362667	0.867324	0.872638	-0.045	1.18691	650000	700000
OX359196.1	14	0.336333	0.440333	0.782982	0.787778	-0.104	2.74308	700000	750000
OX359196.1	15	0.281667	0.305	0.961164	0.967053	-0.0233333	0.615434	750000	800000
OX359196.1	16	0.487	0.509333	1.00127	1.00741	-0.0223333	0.589058	800000	850000
OX359196.1	17	0.533	0.475	1.13573	1.14268	0.058	-1.52979	850000	900000
OX359196.1	18	0.766333	0.861333	0.923444	0.929101	-0.095	2.50569	900000	950000
OX359196.1	19	0.483333	0.558667	0.862193	0.867476	-0.0753333	1.98697	950000	1000000
OX359196.1	20	0.411	0.497667	0.839421	0.844564	-0.0866667	2.2859	1000000	1050000
OX359196.1	21	0.399667	0.498667	0.82152	0.826553	-0.099	2.6112	1050000	1100000
OX359196.1	22	0.643667	0.710333	0.914942	0.920548	-0.0666667	1.75838	1100000	1150000
OX359196.1	23	0.698	0.759667	0.898765	0.904271	-0.0616667	1.6265	1150000	1200000
OX359196.1	24	0.532	0.565333	0.97626	0.982241	-0.0333333	0.879191	1200000	1250000
OX359196.1	25	0.436667	0.515667	0.863808	0.8691	-0.079	2.08368	1250000	1300000
OX359196.1	26	0.313667	0.424667	1.833	1.84423	-0.111	2.92771	1300000	1350000
OX359196.1	27	0.248148	0.45037	0.584668	0.58825	-0.202222	5.33376	1350000	1400000
OX359196.1	28	0.253	0.332667	0.774224	0.778967	-0.0796667	2.10127	1400000	1450000
OX359196.1	29	0.356667	0.539	0.673539	0.677665	-0.182333	4.80917	1450000	1500000
OX359196.1	30	0.444667	0.549333	0.81101	0.815979	-0.104667	2.76066	1500000	1550000
OX359196.1	31	0.276667	0.389333	0.699249	0.703532	-0.112667	2.97167	1550000	1600000
OX359196.1	32	0.329333	0.422333	0.770576	0.775297	-0.093	2.45294	1600000	1650000
OX359196.1	33	0.481667	0.453	1.03089	1.0372	0.0286667	-0.756104	1650000	1700000
OX359196.1	34	0.463667	0.544333	0.902675	0.908206	-0.0806667	2.12764	1700000	1750000
OX359196.1	35	0.359667	0.349667	1.08736	1.09402	0.01	-0.263757	1750000	1800000
OX359196.1	36	0.475	0.4	1.3704	1.37879	0.075	-1.97818	1800000	1850000
OX359196.1	37	0.425	0.306	1.48608	1.49518	0.119	-3.13871	1850000	1900000
OX359196.1	38	0.348	0.401667	0.851	0.856213	-0.0536667	1.4155	1900000	1950000
OX359196.1	39	0.283	0.385333	0.698008	0.702284	-0.102333	2.69912	1950000	2000000
OX359196.1	40	0.274333	0.263	1.0236	1.02987	0.0113333	-0.298925	2000000	2050000
OX359196.1	41	0.331333	0.380667	0.891419	0.89688	-0.0493333	1.3012	2050000	2100000
OX359196.1	42	0.224	0.160667	1.55423	1.56375	0.0633333	-1.67046	2100000	2150000
OX359196.1	43	0.251	0.214	1.29995	1.30791	0.037	-0.975902	2150000	2200000
OX359196.1	44	0.361333	0.321333	1.3228	1.33091	0.04	-1.05503	2200000	2250000
OX359196.1	45	0.581667	0.553667	1.09871	1.10544	0.028	-0.73852	2250000	2300000
OX359196.1	46	0.177333	0.134333	1.56184	1.57141	0.043	-1.13416	2300000	2350000
OX359196.1	47	0.134333	0.15	0.827425	0.832495	-0.0156667	0.41322	2350000	2400000
OX359196.1	48	0.23	0.234	0.972584	0.978542	-0.004	0.105503	2400000	2450000
OX359196.1	49	0.182	0.212333	0.882644	0.888052	-0.0303333	0.800064	2450000	2500000
OX359196.1	50	0.162	0.192	0.879693	0.885083	-0.03	0.791272	2500000	2550000
OX359196.1	51	0.286667	0.297667	0.93196	0.93767	-0.011	0.290133	2550000	2600000
OX359196.1	52	0.617667	0.591667	1.03747	1.04383	0.026	-0.685769	2600000	2650000
OX359196.1	53	0.496333	0.464	1.09819	1.10492	0.0323333	-0.852815	2650000	2700000
OX359196.1	54	0.439	0.352	1.27207	1.27986	0.087	-2.29469	2700000	2750000
OX359196.1	55	0.186667	0.147	1.2187	1.22616	0.0396667	-1.04624	2750000	2800000
OX359196.1	56	0.165667	0.169667	0.971918	0.977872	-0.004	0.105503	2800000	2850000
OX359196.1	57	0.195333	0.223333	0.963338	0.96924	-0.028	0.73852	2850000	2900000
OX359196.1	58	0.194333	0.230667	0.837911	0.843045	-0.0363333	0.958318	2900000	2950000
OX359196.1	59	0.261	0.285333	0.930749	0.936451	-0.0243333	0.641809	2950000	3000000
OX359196.1	60	0.213333	0.235333	0.908166	0.913729	-0.022	0.580266	3000000	3050000
OX359196.1	61	0.219667	0.255667	0.863047	0.868334	-0.036	0.949526	3050000	3100000
OX359196.1	62	0.340333	0.357333	0.932184	0.937895	-0.017	0.448387	3100000	3150000
OX359196.1	63	0.130667	0.156	0.806902	0.811846	-0.0253333	0.668185	3150000	3200000
OX359196.1	64	0.171333	0.199	0.907207	0.912765	-0.0276667	0.729728	3200000	3250000
OX359196.1	65	0.200667	0.183	1.21813	1.22559	0.0176667	-0.465971	3250000	3300000
OX359196.1	66	0.26	0.193333	1.33321	1.34137	0.0666667	-1.75838	3300000	3350000
OX359196.1	67	0.232667	0.208	1.11579	1.12262	0.0246667	-0.650601	3350000	3400000
OX359196.1	68	0.331667	0.276667	1.27651	1.28433	0.055	-1.45067	3400000	3450000
OX359196.1	69	0.374	0.340667	1.03188	1.0382	0.0333333	-0.879191	3450000	3500000
OX359196.1	70	0.249667	0.236667	1.21902	1.22649	0.013	-0.342884	3500000	3550000
OX359196.1	71	0.158333	0.209667	0.81938	0.8244	-0.0513333	1.35395	3550000	3600000
OX359196.1	72	0.157333	0.228	0.806066	0.811004	-0.0706667	1.86388	3600000	3650000
OX359196.1	73	0.103333	0.120667	0.82422	0.82927	-0.0173333	0.457179	3650000	3700000
OX359196.1	74	0.164	0.190333	0.834926	0.840041	-0.0263333	0.694561	3700000	3750000
OX359196.1	75	0.0903333	0.091	1.09432	1.10103	-0.000666667	0.0175838	3750000	3800000
OX359196.1	76	0.271667	0.260333	1.21817	1.22564	0.0113333	-0.298925	3800000	3850000
OX359196.1	77	0.141667	0.18	2.0102	2.02251	-0.0383333	1.01107	3850000	3900000
OX359196.1	78	0.280667	0.232	1.29354	1.30146	0.0486667	-1.28362	3900000	3950000
OX359196.1	79	0.319	0.424667	0.756215	0.760847	-0.105667	2.78704	3950000	4000000
OX359196.1	80	0.250333	0.385667	0.676904	0.681051	-0.135333	3.56952	4000000	4050000
OX359196.1	81	0.332	0.398	0.80673	0.811672	-0.066	1.7408	4050000	4100000
OX359196.1	82	0.321667	0.3	1.12231	1.12919	0.0216667	-0.571474	4100000	4150000
OX359196.1	83	0.417667	0.426	1.01075	1.01695	-0.00833333	0.219798	4150000	4200000
OX359196.1	84	0.570667	0.497	1.26562	1.27337	0.0736667	-1.94301	4200000	4250000
OX359196.1	85	0.416	0.506	0.824075	0.829124	-0.09	2.37382	4250000	4300000
OX359196.1	86	0.413333	0.395333	1.13823	1.14521	0.018	-0.474763	4300000	4350000
OX359196.1	87	0.265	0.354	0.793806	0.79867	-0.089	2.34744	4350000	4400000
OX359196.1	88	0.309	0.400333	0.789666	0.794504	-0.0913333	2.40898	4400000	4450000
OX359196.1	89	0.362333	0.475	0.804501	0.809429	-0.112667	2.97167	4450000	4500000
OX359196.1	90	0.361	0.411	0.897137	0.902634	-0.05	1.31879	4500000	4550000
OX359196.1	91	0.364	0.417	0.850022	0.85523	-0.053	1.39791	4550000	4600000
OX359196.1	92	0.278333	0.308667	0.912152	0.91774	-0.0303333	0.800064	4600000	4650000
OX359196.1	93	0.407667	0.372	1.21412	1.22156	0.0356667	-0.940734	4650000	4700000
OX359196.1	94	0.609333	0.468	1.29658	1.30453	0.141333	-3.72777	4700000	4750000
OX359196.1	95	0.413333	0.38	1.10455	1.11132	0.0333333	-0.879191	4750000	4800000
OX359196.1	96	0.409333	0.427333	0.955306	0.961159	-0.018	0.474763	4800000	4850000
OX359196.1	97	0.322	0.498333	0.688853	0.693073	-0.176333	4.65092	4850000	4900000
OX359196.1	98	0.173667	0.370333	0.512775	0.515917	-0.196667	5.18723	4900000	4950000
OX359196.1	99	0.411333	0.485333	0.828249	0.833323	-0.074	1.9518	4950000	5000000
OX359196.1	100	0.391333	0.615667	0.66556	0.669637	-0.224333	5.91695	5000000	5050000
OX359196.1	101	0.471333	0.57	0.924874	0.93054	-0.0986667	2.60241	5050000	5100000
OX359196.1	102	0.557333	0.636667	0.922803	0.928456	-0.0793333	2.09247	5100000	5150000
OX359196.1	103	0.394667	0.465667	0.848569	0.853768	-0.071	1.87268	5150000	5200000
OX359196.1	104	0.335333	0.331667	1.20224	1.2096	0.00366667	-0.096711	5200000	5250000
OX359196.1	105	0.339333	0.334	1.10627	1.11304	0.00533333	-0.140671	5250000	5300000
OX359196.1	106	0.250333	0.303667	0.816724	0.821728	-0.0533333	1.40671	5300000	5350000
OX359196.1	107	0.212667	0.275667	0.799882	0.804782	-0.063	1.66167	5350000	5400000
OX359196.1	108	0.244	0.311	0.747703	0.752283	-0.067	1.76717	5400000	5450000
OX359196.1	109	0.298667	0.322667	1.00628	1.01245	-0.024	0.633017	5450000	5500000
OX359196.1	110	0.295	0.319333	1.00268	1.00882	-0.0243333	0.641809	5500000	5550000
OX359196.1	111	0.267667	0.273	0.987733	0.993784	-0.00533333	0.140671	5550000	5600000
OX359196.1	112	0.199	0.263	0.796821	0.801702	-0.064	1.68805	5600000	5650000
OX359196.1	113	0.134667	0.186333	0.774449	0.779194	-0.0516667	1.36275	5650000	5700000
OX359196.1	114	0.220667	0.209333	1.08236	1.089	0.0113333	-0.298925	5700000	5750000
OX359196.1	115	0.265	0.207667	1.38606	1.39455	0.0573333	-1.51221	5750000	5800000
OX359196.1	116	0.288333	0.271	1.06269	1.0692	0.0173333	-0.457179	5800000	5850000
OX359196.1	117	0.239667	0.277	0.867886	0.873203	-0.0373333	0.984694	5850000	5900000
OX359196.1	118	0.231333	0.221667	1.05433	1.06079	0.00966667	-0.254965	5900000	5950000
OX359196.1	119	0.322333	0.26	1.22924	1.23677	0.0623333	-1.64409	5950000	6000000
OX359196.1	120	0.234667	0.252	0.959596	0.965475	-0.0173333	0.457179	6000000	6050000
OX359196.1	121	0.341	0.313667	1.15376	1.16083	0.0273333	-0.720937	6050000	6100000
OX359196.1	122	0.481333	0.449667	1.08592	1.09258	0.0316667	-0.835231	6100000	6150000
OX359196.1	123	0.368	0.364667	1.07239	1.07896	0.00333333	-0.0879191	6150000	6200000
OX359196.1	124	0.297	0.359333	0.898734	0.90424	-0.0623333	1.64409	6200000	6250000
OX359196.1	125	0.302667	0.428	0.816962	0.821967	-0.125333	3.30576	6250000	6300000
OX359196.1	126	0.29	0.215	1.84151	1.85279	0.075	-1.97818	6300000	6350000
OX359196.1	127	0.372	0.177	2.22515	2.23879	0.195	-5.14327	6350000	6400000
OX359196.1	128	0.416	0.403	1.0384	1.04476	0.013	-0.342884	6400000	6450000
OX359196.1	129	0.343	0.351	0.991004	0.997075	-0.008	0.211006	6450000	6500000
OX359196.1	130	0.350667	0.318667	1.22067	1.22815	0.032	-0.844023	6500000	6550000
OX359196.1	131	0.197	0.191667	1.11747	1.12431	0.00533333	-0.140671	6550000	6600000
OX359196.1	132	0.403333	0.284333	1.46951	1.47851	0.119	-3.13871	6600000	6650000
OX359196.1	133	0.407333	0.366333	1.1393	1.14628	0.041	-1.0814	6650000	6700000
OX359196.1	134	0.241667	0.291	0.842676	0.847839	-0.0493333	1.3012	6700000	6750000
OX359196.1	135	0.249667	0.344	0.708892	0.713235	-0.0943333	2.48811	6750000	6800000
OX359196.1	136	0.171	0.168667	1.80129	1.81232	0.00233333	-0.0615434	6800000	6850000
OX359196.1	137	0.335833	0.42875	0.806375	0.811316	-0.0929167	2.45074	6860000	6900000
OX359196.1	138	0.359333	0.479333	0.904404	0.909945	-0.12	3.16509	6900000	6950000
OX359196.1	139	0.183	0.246	0.695762	0.700024	-0.063	1.66167	6950000	7000000
OX359196.1	140	0.283	0.348667	0.980494	0.986501	-0.0656667	1.73201	7000000	7050000
OX359196.1	141	0.339	0.269667	1.61088	1.62075	0.0693333	-1.82872	7050000	7100000
OX359196.1	142	0.181667	0.226667	0.825264	0.83032	-0.045	1.18691	7100000	7150000
OX359196.1	143	0.398	0.378333	1.17141	1.17859	0.0196667	-0.518723	7150000	7200000
OX359196.1	144	0.219	0.207333	1.08059	1.08721	0.0116667	-0.307717	7200000	7250000
OX359196.1	145	0.325667	0.251667	1.40796	1.41658	0.074	-1.9518	7250000	7300000
OX359196.1	146	0.419333	0.266667	1.82543	1.83662	0.152667	-4.02669	7300000	7350000
OX359196.1	147	0.302333	0.289	1.15791	1.16501	0.0133333	-0.351676	7350000	7400000
OX359196.1	148	0.191667	0.174667	1.34561	1.35386	0.017	-0.448387	7400000	7450000
OX359196.1	149	0.178333	0.198	0.846169	0.851353	-0.0196667	0.518723	7450000	7500000
OX359196.1	150	0.267667	0.281	1.01104	1.01723	-0.0133333	0.351676	7500000	7550000
OX359196.1	151	0.275333	0.210667	1.52299	1.53232	0.0646667	-1.70563	7550000	7600000
OX359196.1	152	0.251667	0.238	1.07233	1.0789	0.0136667	-0.360468	7600000	7650000
OX359196.1	153	0.453333	0.541	0.850075	0.855283	-0.0876667	2.31227	7650000	7700000
OX359196.1	154	0.443333	0.596333	0.737737	0.742256	-0.153	4.03549	7700000	7750000
OX359196.1	155	0.187333	0.248667	0.816363	0.821365	-0.0613333	1.61771	7750000	7800000
OX359196.1	156	0.329	0.401667	0.899539	0.90505	-0.0726667	1.91664	7800000	7850000
OX359196.1	157	0.276667	0.362333	0.7504	0.754997	-0.0856667	2.25952	7850000	7900000
OX359196.1	158	0.213	0.413	0.550037	0.553407	-0.2	5.27515	7900000	7950000
OX359196.1	159	0.251333	0.404667	0.623612	0.627432	-0.153333	4.04428	7950000	8000000
OX359196.1	160	0.24	0.280667	0.887235	0.892671	-0.0406667	1.07261	8000000	8050000
OX359196.1	161	0.215667	0.298667	0.747867	0.752449	-0.083	2.18919	8050000	8100000
OX359196.1	162	0.192667	0.307333	0.62601	0.629845	-0.114667	3.02442	8100000	8125000
OX359197.1	0	0.171667	0.22	0.767273	0.771974	-0.0483333	1.27483	0	50000
OX359197.1	1	0.233667	0.230667	0.883116	0.888527	0.003	-0.0791272	50000	100000
OX359197.1	2	0.326333	0.402	0.858411	0.86367	-0.0756667	1.99576	100000	150000
OX359197.1	3	0.609667	0.678	0.912869	0.918462	-0.0683333	1.80234	150000	200000
OX359197.1	4	0.803	0.833	0.981813	0.987828	-0.03	0.791272	200000	250000
OX359197.1	5	0.542333	0.795	0.690549	0.694779	-0.252667	6.66427	250000	300000
OX359197.1	6	0.457667	0.557667	0.833549	0.838656	-0.1	2.63757	300000	350000
OX359197.1	7	0.620333	0.587	1.09371	1.10041	0.0333333	-0.879191	350000	400000
OX359197.1	8	0.578667	0.570667	1.01629	1.02252	0.008	-0.211006	400000	450000
OX359197.1	9	0.480667	0.557	0.841256	0.84641	-0.0763333	2.01335	450000	500000
OX359197.1	10	0.538333	0.680667	0.833454	0.83856	-0.142333	3.75415	500000	550000
OX359197.1	11	0.408667	0.399	1.12922	1.13613	0.00966667	-0.254965	550000	600000
OX359197.1	12	0.478333	0.548333	0.888692	0.894136	-0.07	1.8463	600000	650000
OX359197.1	13	0.376333	0.418	0.90858	0.914146	-0.0416667	1.09899	650000	700000
OX359197.1	14	0.305	0.329667	0.955516	0.96137	-0.0246667	0.650601	700000	750000
OX359197.1	15	0.606	0.658333	0.931278	0.936983	-0.0523333	1.38033	750000	800000
OX359197.1	16	0.575333	0.564667	1.05811	1.06459	0.0106667	-0.281341	800000	850000
OX359197.1	17	0.531333	0.548	0.970152	0.976096	-0.0166667	0.439595	850000	900000
OX359197.1	18	0.684	0.497667	1.47573	1.48478	0.186333	-4.91468	900000	950000
OX359197.1	19	0.810667	0.740333	1.14197	1.14897	0.0703333	-1.85509	950000	1000000
OX359197.1	20	0.566667	0.612	0.916645	0.922261	-0.0453333	1.1957	1000000	1050000
OX359197.1	21	0.405667	0.403667	1.06186	1.06836	0.002	-0.0527515	1050000	1100000
OX359197.1	22	0.378667	0.426	0.869312	0.874638	-0.0473333	1.24845	1100000	1150000
OX359197.1	23	0.290333	0.344333	0.857442	0.862696	-0.054	1.42429	1150000	1200000
OX359197.1	24	0.379667	0.432667	0.939592	0.945349	-0.053	1.39791	1200000	1250000
OX359197.1	25	0.297	0.329333	1.05744	1.06392	-0.0323333	0.852815	1250000	1300000
OX359197.1	26	0.353333	0.367	1.02202	1.02829	-0.0136667	0.360468	1300000	1350000
OX359197.1	27	0.323333	0.327667	1.05937	1.06586	-0.00433333	0.114295	1350000	1400000
OX359197.1	28	0.558519	0.520741	1.19542	1.20274	0.0377778	-0.996416	1400000	1450000
OX359197.1	29	0.530667	0.443	1.07929	1.0859	0.0876667	-2.31227	1450000	1500000
OX359197.1	30	0.716	0.806667	0.891024	0.896483	-0.0906667	2.3914	1500000	1550000
OX359197.1	31	0.442	0.365	1.21981	1.22728	0.077	-2.03093	1550000	1600000
OX359197.1	32	0.623667	0.779	0.809544	0.814504	-0.155333	4.09703	1600000	1650000
OX359197.1	33	0.452667	0.621333	0.737934	0.742455	-0.168667	4.44871	1650000	1700000
OX359197.1	34	0.391	0.59	0.672722	0.676843	-0.199	5.24877	1700000	1750000
OX359197.1	35	0.654667	0.83	0.790928	0.795774	-0.175333	4.62454	1750000	1800000
OX359197.1	36	0.587667	0.623	0.986071	0.992112	-0.0353333	0.931942	1800000	1850000
OX359197.1	37	0.555333	0.622	0.90455	0.910092	-0.0666667	1.75838	1850000	1900000
OX359197.1	38	0.558	0.775667	0.721565	0.725985	-0.217667	5.74112	1900000	1950000
OX359197.1	39	0.236	0.219	1.4589	1.46784	0.017	-0.448387	1950000	2000000
OX359197.1	40	0.077	0.078	0.873842	0.879196	-0.001	0.0263757	2000000	2050000
OX359197.1	41	0.308667	0.279667	1.19895	1.2063	0.029	-0.764896	2050000	2100000
OX359197.1	42	0.266	0.221333	1.78304	1.79396	0.0446667	-1.17812	2100000	2150000
OX359197.1	43	0.427407	0.447407	0.957686	0.963554	-0.02	0.527515	2150000	2200000
OX359197.1	44	0.603	0.727667	0.840973	0.846125	-0.124667	3.28817	2200000	2250000
OX359197.1	45	0.341	0.425667	0.867618	0.872933	-0.0846667	2.23314	2250000	2300000
OX359197.1	46	0.401667	0.44	0.934873	0.9406	-0.0383333	1.01107	2300000	2350000
OX359197.1	47	0.528	0.488667	1.1023	1.10905	0.0393333	-1.03745	2350000	2400000
OX359197.1	48	0.454333	0.458	1.08229	1.08892	-0.00366667	0.096711	2400000	2450000
OX359197.1	49	0.404667	0.434333	1.09625	1.10296	-0.0296667	0.78248	2450000	2500000
OX359197.1	50	0.508333	0.526333	1.0596	1.06609	-0.018	0.474763	2500000	2550000
OX359197.1	51	0.469	0.411667	1.12565	1.13254	0.0573333	-1.51221	2550000	2600000
OX359197.1	52	0.464	0.451667	1.02868	1.03499	0.0123333	-0.325301	2600000	2650000
OX359197.1	53	0.459	0.433333	1.10399	1.11076	0.0256667	-0.676977	2650000	2700000
OX359197.1	54	0.321333	0.297667	1.12394	1.13083	0.0236667	-0.624226	2700000	2750000
OX359197.1	55	0.379333	0.387333	0.967821	0.97375	-0.008	0.211006	2750000	2800000
OX359197.1	56	0.494	0.575	0.880078	0.88547	-0.081	2.13643	2800000	2850000
OX359197.1	57	0.265667	0.252333	1.04824	1.05466	0.0133333	-0.351676	2850000	2900000
OX359197.1	58	0.356	0.265333	1.30601	1.31401	0.0906667	-2.3914	2900000	2950000
OX359197.1	59	0.351	0.269333	1.35422	1.36251	0.0816667	-2.15402	2950000	3000000
OX359197.1	60	0.334	0.269333	1.19338	1.20069	0.0646667	-1.70563	3000000	3050000
OX359197.1	61	0.291	0.222667	1.30627	1.31427	0.0683333	-1.80234	3050000	3100000
OX359197.1	62	0.206667	0.135333	1.53496	1.54436	0.0713333	-1.88147	3100000	3150000
OX359197.1	63	0.354333	0.234667	1.51093	1.52018	0.119667	-3.1563	3150000	3200000
OX359197.1	64	0.133333	0.193333	0.729962	0.734434	-0.06	1.58254	3200000	3250000
OX359197.1	65	0.221	0.333	0.612898	0.616653	-0.112	2.95408	3250000	3300000
OX359197.1	66	0.183	0.224333	0.703887	0.7082	-0.0413333	1.0902	3300000	3350000
OX359197.1	67	0.0236667	0.0773333	0.295069	0.296877	-0.0536667	1.4155	3350000	3400000
OX359197.1	68	0.217333	0.425	0.474677	0.477585	-0.207667	5.47736	3400000	3450000
OX359197.1	69	0.258667	0.424667	0.593568	0.597204	-0.166	4.37837	3450000	3500000
OX359197.1	70	0.186	0.362333	0.543374	0.546703	-0.176333	4.65092	3500000	3550000
OX359197.1	71	0.156667	0.252	0.681528	0.685703	-0.0953333	2.51449	3550000	3600000
OX359197.1	72	0.103333	0.149	0.845172	0.85035	-0.0456667	1.20449	3600000	3650000
OX359197.1	73	0.242667	0.298667	0.729942	0.734414	-0.056	1.47704	3650000	3700000
OX359197.1	74	0.272667	0.268667	1.02199	1.02825	0.004	-0.105503	3700000	3750000
OX359197.1	75	0.0706667	0.107	0.45569	0.458482	-0.0363333	0.958318	3750000	3800000
OX359197.1	76	0.084	0.119667	0.599849	0.603524	-0.0356667	0.940734	3800000	3850000
OX359197.1	77	0.076	0.084	0.851506	0.856723	-0.008	0.211006	3850000	3900000
OX359197.1	78	0.222	0.18	1.46403	1.473	0.042	-1.10778	3900000	3950000
OX359197.1	79	0.589	0.621	0.929428	0.935123	-0.032	0.844023	3950000	4000000
OX359197.1	80	0.320333	0.363	0.865165	0.870466	-0.0426667	1.12536	4000000	4050000
OX359197.1	81	0.401667	0.459333	0.922946	0.9286	-0.0576667	1.521	4050000	4100000
OX359197.1	82	0.575	0.593333	0.973839	0.979805	-0.0183333	0.483555	4100000	4150000
OX359197.1	83	0.647	0.553	1.24995	1.25761	0.094	-2.47932	4150000	4200000
OX359197.1	84	0.425	0.474	0.970356	0.976301	-0.049	1.29241	4200000	4250000
OX359197.1	85	0.625667	0.801333	0.808122	0.813073	-0.175667	4.63334	4250000	4300000
OX359197.1	86	0.567	0.670667	0.882579	0.887986	-0.103667	2.73428	4300000	4350000
OX359197.1	87	0.572333	0.758333	0.921141	0.926784	-0.186	4.90589	4350000	4400000
OX359197.1	88	0.463	0.446333	0.999136	1.00526	0.0166667	-0.439595	4400000	4450000
OX359197.1	89	0.317333	0.318	1.08332	1.08996	-0.000666667	0.0175838	4450000	4500000
OX359197.1	90	0.411333	0.407333	1.12969	1.13661	0.004	-0.105503	4500000	4550000
OX359197.1	91	0.335	0.462	0.722278	0.726703	-0.127	3.34972	4550000	4600000
OX359197.1	92	0.315	0.407667	0.762213	0.766883	-0.0926667	2.44415	4600000	4650000
OX359197.1	93	0.271333	0.228	1.26854	1.27631	0.0433333	-1.14295	4650000	4700000
OX359197.1	94	0.432667	0.305333	1.63313	1.64313	0.127333	-3.35851	4700000	4750000
OX359197.1	95	0.420667	0.22	2.43679	2.45172	0.200667	-5.29273	4750000	4800000
OX359197.1	96	0.378333	0.349333	1.04657	1.05298	0.029	-0.764896	4800000	4850000
OX359197.1	97	0.167667	0.128667	1.73707	1.74771	0.039	-1.02865	4850000	4900000
OX359197.1	98	0.491667	0.423333	1.23875	1.24634	0.0683333	-1.80234	4900000	4950000
OX359197.1	99	0.503333	0.460667	2.11628	2.12925	0.0426667	-1.12536	4950000	5000000
OX359197.1	100	0.588	0.661333	0.925379	0.931048	-0.0733333	1.93422	5000000	5050000
OX359197.1	101	0.603333	0.715	0.859852	0.865119	-0.111667	2.94529	5050000	5100000
OX359197.1	102	0.366333	0.496	0.80438	0.809308	-0.129667	3.42005	5100000	5150000
OX359197.1	103	0.388667	0.49	0.81067	0.815637	-0.101333	2.67274	5150000	5200000
OX359197.1	104	0.41	0.416333	1.01976	1.02601	-0.00633333	0.167046	5200000	5250000
OX359197.1	105	0.359667	0.351	1.01518	1.0214	0.00866667	-0.22859	5250000	5300000
OX359197.1	106	0.656333	0.675	0.97849	0.984485	-0.0186667	0.492347	5300000	5350000
OX359197.1	107	0.582	0.602333	0.999828	1.00595	-0.0203333	0.536306	5350000	5400000
OX359197.1	108	0.565333	0.581	0.964078	0.969984	-0.0156667	0.41322	5400000	5450000
OX359197.1	109	0.218333	0.199333	1.18855	1.19583	0.019	-0.501139	5450000	5500000
OX359197.1	110	0.561333	0.615333	0.899233	0.904742	-0.054	1.42429	5500000	5550000
OX359197.1	111	0.619333	0.724	0.843296	0.848463	-0.104667	2.76066	5550000	5600000
OX359197.1	112	0.412333	0.461333	0.878947	0.884332	-0.049	1.29241	5600000	5650000
OX359197.1	113	0.466667	0.430333	1.12665	1.13356	0.0363333	-0.958318	5650000	5700000
OX359197.1	114	0.294333	0.28	1.0185	1.02474	0.0143333	-0.378052	5700000	5750000
OX359197.1	115	0.533667	0.560333	0.937432	0.943175	-0.0266667	0.703353	5750000	5800000
OX359197.1	116	0.331	0.469	0.689844	0.69407	-0.138	3.63985	5800000	5850000
OX359197.1	117	0.454333	0.481667	0.994014	1.0001	-0.0273333	0.720937	5850000	5900000
OX359197.1	118	0.314	0.197333	1.7515	1.76223	0.116667	-3.07717	5900000	5950000
OX359197.1	119	0.253667	0.236667	1.17569	1.1829	0.017	-0.448387	5950000	6000000
OX359197.1	120	0.240333	0.226667	1.12352	1.1304	0.0136667	-0.360468	6000000	6050000
OX359197.1	121	0.475667	0.481333	1.13008	1.137	-0.00566667	0.149462	6050000	6100000
OX359197.1	122	0.254667	0.401667	0.681261	0.685434	-0.147	3.87723	6100000	6150000
OX359197.1	123	0.363333	0.415926	0.904608	0.91015	-0.0525926	1.38717	6150000	6200000
OX359197.1	124	0.452	0.511333	0.843093	0.848258	-0.0593333	1.56496	6200000	6250000
OX359197.1	125	0.575333	0.596667	0.971437	0.977389	-0.0213333	0.562682	6250000	6300000
OX359197.1	126	0.481333	0.558667	0.867494	0.872809	-0.0773333	2.03972	6300000	6350000
OX359197.1	127	0.431667	0.472667	0.935994	0.941728	-0.041	1.0814	6350000	6400000
OX359197.1	128	0.349	0.351	1.00075	1.00688	-0.002	0.0527515	6400000	6450000
OX359197.1	129	0.623667	0.660667	0.988316	0.99437	-0.037	0.975902	6450000	6500000
OX359197.1	130	0.284333	0.347667	0.983239	0.989263	-0.0633333	1.67046	6500000	6550000
OX359197.1	131	0.345667	0.299333	1.64535	1.65543	0.0463333	-1.22208	6550000	6600000
OX359197.1	132	0.529333	0.609667	0.93354	0.939259	-0.0803333	2.11885	6600000	6650000
OX359197.1	133	0.430667	0.387667	1.10865	1.11544	0.043	-1.13416	6650000	6700000
OX359197.1	134	0.502667	0.690333	0.694668	0.698924	-0.187667	4.94984	6700000	6750000
OX359197.1	135	0.472667	0.564333	0.964578	0.970487	-0.0916667	2.41778	6750000	6800000
OX359197.1	136	0.347667	0.354	1.05116	1.0576	-0.00633333	0.167046	6800000	6850000
OX359197.1	137	0.295667	0.361	0.87921	0.884596	-0.0653333	1.72321	6850000	6900000
OX359197.1	138	0.318667	0.327	1.02308	1.02935	-0.00833333	0.219798	6900000	6950000
OX359197.1	139	0.46	0.465	1.12601	1.13291	-0.005	0.131879	6950000	7000000
OX359197.1	140	0.379333	0.276667	1.34002	1.34823	0.102667	-2.70791	7000000	7050000
OX359197.1	141	0.295667	0.346333	0.860592	0.865865	-0.0506667	1.33637	7050000	7100000
OX359197.1	142	0.327	0.401333	0.805226	0.810159	-0.0743333	1.9606	7100000	7150000
OX359197.1	143	0.307667	0.388	0.702202	0.706504	-0.0803333	2.11885	7150000	7200000
OX359197.1	144	0.210667	0.263667	0.773736	0.778477	-0.053	1.39791	7200000	7250000
OX359197.1	145	0.214	0.261667	0.834	0.839109	-0.0476667	1.25724	7250000	7300000
OX359197.1	146	0.538667	0.480333	1.18987	1.19716	0.0583333	-1.53858	7300000	7350000
OX359197.1	147	0.430667	0.500667	0.8557	0.860942	-0.07	1.8463	7350000	7400000
OX359197.1	148	0.423667	0.499	0.897223	0.90272	-0.0753333	1.98697	7400000	7450000
OX359197.1	149	0.195	0.243333	0.802601	0.807518	-0.0483333	1.27483	7450000	7500000
OX359197.1	150	0.261667	0.338	0.850509	0.855719	-0.0763333	2.01335	7500000	7550000
OX359197.1	151	0.360333	0.411333	0.872143	0.877487	-0.051	1.34516	7550000	7600000
OX359197.1	152	0.285	0.385	0.763913	0.768593	-0.1	2.63757	7600000	7650000
OX359197.1	153	0.200667	0.192667	1.07719	1.08378	0.008	-0.211006	7650000	7700000
OX359198.1	0	0.208333	0.307333	0.702486	0.70679	-0.099	2.6112	0	50000
OX359198.1	1	0.281852	0.32037	0.859436	0.864701	-0.0385185	1.01595	50000	95000
OX359198.1	2	0.292667	0.398667	0.581637	0.5852	-0.106	2.79583	110000	150000
OX359198.1	3	0.312667	0.317667	1.01987	1.02612	-0.005	0.131879	150000	200000
OX359198.1	4	0.556	0.689667	0.817731	0.822741	-0.133667	3.52556	200000	250000
OX359198.1	5	0.635	0.672	0.940741	0.946505	-0.037	0.975902	250000	300000
OX359198.1	6	0.569667	0.711	0.821842	0.826877	-0.141333	3.72777	300000	350000
OX359198.1	7	0.319333	0.473333	0.694979	0.699237	-0.154	4.06186	350000	400000
OX359198.1	8	0.606333	0.688	0.86754	0.872855	-0.0816667	2.15402	400000	450000
OX359198.1	9	0.437667	0.503667	0.889263	0.894711	-0.066	1.7408	450000	500000
OX359198.1	10	0.364667	0.316667	1.27505	1.28286	0.048	-1.26603	500000	550000
OX359198.1	11	0.413	0.477333	0.804771	0.809702	-0.0643333	1.69684	550000	600000
OX359198.1	12	0.670667	0.698	1.00721	1.01338	-0.0273333	0.720937	600000	650000
OX359198.1	13	0.523667	0.587333	0.896609	0.902102	-0.0636667	1.67925	650000	700000
OX359198.1	14	0.556667	0.626	0.902129	0.907655	-0.0693333	1.82872	700000	750000
OX359198.1	15	0.421333	0.585	0.727255	0.731711	-0.163667	4.31683	750000	800000
OX359198.1	16	0.579	0.577	1.00025	1.00638	0.002	-0.0527515	800000	850000
OX359198.1	17	0.63	0.622667	1.03961	1.04598	0.00733333	-0.193422	850000	900000
OX359198.1	18	0.644	0.684	0.955321	0.961174	-0.04	1.05503	900000	950000
OX359198.1	19	0.464667	0.486333	0.919467	0.9251	-0.0216667	0.571474	950000	1000000
OX359198.1	20	0.383	0.433667	0.879021	0.884406	-0.0506667	1.33637	1000000	1050000
OX359198.1	21	0.492333	0.485	0.987101	0.993149	0.00733333	-0.193422	1050000	1100000
OX359198.1	22	0.296667	0.364667	0.8495	0.854704	-0.068	1.79355	1100000	1150000
OX359198.1	23	0.348667	0.374667	0.922062	0.927711	-0.026	0.685769	1150000	1200000
OX359198.1	24	0.532333	0.6	0.902186	0.907713	-0.0676667	1.78476	1200000	1250000
OX359198.1	25	0.620333	0.607667	0.994073	1.00016	0.0126667	-0.334093	1250000	1300000
OX359198.1	26	0.441667	0.506	0.842214	0.847374	-0.0643333	1.69684	1300000	1350000
OX359198.1	27	0.391667	0.425333	0.945685	0.951478	-0.0336667	0.887983	1350000	1400000
OX359198.1	28	0.414333	0.453667	0.884806	0.890227	-0.0393333	1.03745	1400000	1450000
OX359198.1	29	0.518667	0.572333	0.918229	0.923854	-0.0536667	1.4155	1450000	1500000
OX359198.1	30	0.371	0.443	0.818811	0.823827	-0.072	1.89905	1500000	1550000
OX359198.1	31	0.374667	0.400333	1.20155	1.20891	-0.0256667	0.676977	1550000	1600000
OX359198.1	32	0.317667	0.388333	0.97865	0.984646	-0.0706667	1.86388	1600000	1650000
OX359198.1	33	0.581	0.641667	0.929661	0.935357	-0.0606667	1.60013	1650000	1700000
OX359198.1	34	0.373	0.371	1.04627	1.05268	0.002	-0.0527515	1700000	1750000
OX359198.1	35	0.0766667	0.0936667	0.689749	0.693975	-0.017	0.448387	1750000	1800000
OX359198.1	36	0.112667	0.126	0.84137	0.846525	-0.0133333	0.351676	1800000	1850000
OX359198.1	37	0.682	0.715	0.952932	0.958771	-0.033	0.870399	1850000	1900000
OX359198.1	38	0.650333	0.638	1.13871	1.14568	0.0123333	-0.325301	1900000	1950000
OX359198.1	39	0.408333	0.545	0.71304	0.717408	-0.136667	3.60468	1950000	2000000
OX359198.1	40	0.485667	0.681	0.746279	0.750851	-0.195333	5.15206	2000000	2050000
OX359198.1	41	0.501667	0.528667	1.04725	1.05367	-0.027	0.712145	2050000	2100000
OX359198.1	42	0.487333	0.579333	0.841074	0.846227	-0.092	2.42657	2100000	2150000
OX359198.1	43	0.765333	0.822333	0.93397	0.939692	-0.057	1.50342	2150000	2200000
OX359198.1	44	0.469	0.501	0.965365	0.971279	-0.032	0.844023	2200000	2250000
OX359198.1	45	0.334	0.452667	0.747056	0.751633	-0.118667	3.12992	2250000	2300000
OX359198.1	46	0.592667	0.803333	0.74065	0.745188	-0.210667	5.55649	2300000	2350000
OX359198.1	47	0.414	0.568	0.687975	0.69219	-0.154	4.06186	2350000	2400000
OX359198.1	48	0.352333	0.452	0.77111	0.775834	-0.0996667	2.62878	2400000	2450000
OX359198.1	49	0.472667	0.557	0.743791	0.748348	-0.0843333	2.22435	2450000	2500000
OX359198.1	50	0.378667	0.578667	0.597265	0.600924	-0.2	5.27515	2500000	2550000
OX359198.1	51	0.527333	0.61	0.874395	0.879752	-0.0826667	2.18039	2550000	2600000
OX359198.1	52	0.285333	0.371333	0.789203	0.794038	-0.086	2.26831	2600000	2650000
OX359198.1	53	0.177	0.255667	0.696126	0.700391	-0.0786667	2.07489	2650000	2700000
OX359198.1	54	0.152667	0.193667	0.935751	0.941484	-0.041	1.0814	2700000	2750000
OX359198.1	55	0.242	0.192667	1.34484	1.35308	0.0493333	-1.3012	2750000	2800000
OX359198.1	56	0.25	0.219333	1.09176	1.09845	0.0306667	-0.808856	2800000	2850000
OX359198.1	57	0.186333	0.196667	0.941309	0.947076	-0.0103333	0.272549	2850000	2900000
OX359198.1	58	0.394	0.436	0.900251	0.905767	-0.042	1.10778	2900000	2950000
OX359198.1	59	0.503667	0.664333	0.787355	0.792179	-0.160667	4.2377	2950000	3000000
OX359198.1	60	0.309667	0.438	0.725434	0.729878	-0.128333	3.38489	3000000	3050000
OX359198.1	61	0.197333	0.201333	1.00655	1.01271	-0.004	0.105503	3050000	3100000
OX359198.1	62	0.221667	0.246333	0.919378	0.925011	-0.0246667	0.650601	3100000	3150000
OX359198.1	63	0.204333	0.219667	0.906228	0.91178	-0.0153333	0.404428	3150000	3200000
OX359198.1	64	0.184667	0.206	0.897959	0.90346	-0.0213333	0.562682	3200000	3250000
OX359198.1	65	0.125	0.150333	0.822273	0.827311	-0.0253333	0.668185	3250000	3300000
OX359198.1	66	0.1	0.106	0.970357	0.976301	-0.006	0.158254	3300000	3350000
OX359198.1	67	0.311	0.331667	1.00037	1.00649	-0.0206667	0.545098	3350000	3400000
OX359198.1	68	0.223	0.238667	0.958195	0.964065	-0.0156667	0.41322	3400000	3450000
OX359198.1	69	0.118	0.0996667	1.59174	1.60149	0.0183333	-0.483555	3450000	3500000
OX359198.1	70	0.323333	0.267667	1.26245	1.27019	0.0556667	-1.46825	3500000	3550000
OX359198.1	71	0.266	0.251667	0.987405	0.993454	0.0143333	-0.378052	3550000	3600000
OX359198.1	72	0.226667	0.257	0.918627	0.924255	-0.0303333	0.800064	3600000	3650000
OX359198.1	73	0.120667	0.136333	0.909426	0.914997	-0.0156667	0.41322	3650000	3700000
OX359198.1	74	0.380333	0.383	0.982941	0.988962	-0.00266667	0.0703353	3700000	3750000
OX359198.1	75	0.682333	0.58	1.27719	1.28501	0.102333	-2.69912	3750000	3800000
OX359198.1	76	0.357	0.352333	1.70515	1.7156	0.00466667	-0.123087	3800000	3850000
OX359198.1	77	0.184667	0.173667	1.39441	1.40295	0.011	-0.290133	3850000	3900000
OX359198.1	78	0.243333	0.279	0.935785	0.941518	-0.0356667	0.940734	3900000	3950000
OX359198.1	79	0.2	0.216333	0.972442	0.9784	-0.0163333	0.430804	3950000	4000000
OX359198.1	80	0.281333	0.256	1.47261	1.48164	0.0253333	-0.668185	4000000	4050000
OX359198.1	81	0.196	0.173	1.2177	1.22516	0.023	-0.606642	4050000	4100000
OX359198.1	82	0.256	0.254333	1.1268	1.1337	0.00166667	-0.0439595	4100000	4150000
OX359198.1	83	0.228333	0.235333	1.00207	1.00821	-0.007	0.18463	4150000	4200000
OX359198.1	84	0.325333	0.334333	0.98385	0.989878	-0.009	0.237382	4200000	4250000
OX359198.1	85	0.365667	0.365	1.02254	1.02881	0.000666667	-0.0175838	4250000	4300000
OX359198.1	86	0.483667	0.487333	1.17849	1.18571	-0.00366667	0.096711	4300000	4350000
OX359198.1	87	0.443667	0.560333	0.807911	0.81286	-0.116667	3.07717	4350000	4400000
OX359198.1	88	0.379	0.401333	0.963288	0.969189	-0.0223333	0.589058	4400000	4450000
OX359198.1	89	0.54	0.631333	0.850717	0.855929	-0.0913333	2.40898	4450000	4500000
OX359198.1	90	0.417	0.608333	0.670235	0.674342	-0.191333	5.04656	4500000	4550000
OX359198.1	91	0.562333	0.713333	0.758996	0.763646	-0.151	3.98273	4550000	4600000
OX359198.1	92	0.382333	0.480667	0.822156	0.827193	-0.0983333	2.59361	4600000	4650000
OX359198.1	93	0.408333	0.633333	0.702648	0.706953	-0.225	5.93454	4650000	4700000
OX359198.1	94	0.577333	0.624333	1.03275	1.03908	-0.047	1.23966	4700000	4750000
OX359198.1	95	0.429	0.489667	0.870117	0.875447	-0.0606667	1.60013	4750000	4800000
OX359198.1	96	0.28	0.416	0.673578	0.677705	-0.136	3.5871	4800000	4850000
OX359198.1	97	0.364	0.444	0.852287	0.857509	-0.08	2.11006	4850000	4900000
OX359198.1	98	0.248667	0.444333	0.47983	0.48277	-0.195667	5.16085	4900000	4950000
OX359198.1	99	0.364	0.476667	0.809668	0.814628	-0.112667	2.97167	4950000	5000000
OX359198.1	100	0.502	0.558	0.96095	0.966837	-0.056	1.47704	5000000	5050000
OX359198.1	101	0.431667	0.506	0.876495	0.881864	-0.0743333	1.9606	5050000	5100000
OX359198.1	102	0.280333	0.443667	0.694985	0.699243	-0.163333	4.30804	5100000	5150000
OX359198.1	103	0.267	0.381	0.691967	0.696207	-0.114	3.00683	5150000	5200000
OX359198.1	104	0.262	0.354667	0.760851	0.765513	-0.0926667	2.44415	5200000	5250000
OX359198.1	105	0.358333	0.374333	1.01775	1.02398	-0.016	0.422012	5250000	5300000
OX359198.1	106	0.516	0.474667	1.11989	1.12675	0.0413333	-1.0902	5300000	5350000
OX359198.1	107	0.496	0.636333	0.768896	0.773607	-0.140333	3.70139	5350000	5400000
OX359198.1	108	0.457	0.607	0.813159	0.81814	-0.15	3.95636	5400000	5450000
OX359198.1	109	0.383667	0.294667	1.32574	1.33386	0.089	-2.34744	5450000	5500000
OX359198.1	110	0.334667	0.434667	0.822551	0.82759	-0.1	2.63757	5500000	5550000
OX359198.1	111	0.434333	0.455333	1.11743	1.12428	-0.021	0.55389	5550000	5600000
OX359198.1	112	0.398333	0.524	0.689148	0.69337	-0.125667	3.31455	5600000	5650000
OX359198.1	113	0.663333	0.826667	0.709248	0.713594	-0.163333	4.30804	5650000	5700000
OX359198.1	114	0.343	0.482	0.684259	0.688451	-0.139	3.66623	5700000	5750000
OX359198.1	115	0.235333	0.219	1.24361	1.25123	0.0163333	-0.430804	5750000	5800000
OX359198.1	116	0.458	0.337333	1.42897	1.43772	0.120667	-3.18267	5800000	5850000
OX359198.1	117	0.41	0.401667	1.08044	1.08706	0.00833333	-0.219798	5850000	5900000
OX359198.1	118	0.273333	0.334667	0.850505	0.855716	-0.0613333	1.61771	5900000	5950000
OX359198.1	119	0.257333	0.284	0.969708	0.975649	-0.0266667	0.703353	5950000	6000000
OX359198.1	120	0.115	0.125667	0.552374	0.555758	-0.0106667	0.281341	6000000	6050000
OX359198.1	121	0.335333	0.318333	1.11656	1.1234	0.017	-0.448387	6050000	6100000
OX359198.1	122	0.381333	0.48	0.820288	0.825313	-0.0986667	2.60241	6100000	6150000
OX359198.1	123	0.139333	0.139333	1.00228	1.00842	-1.38744e-18	3.19189e-17	6150000	6200000
OX359198.1	124	0.139667	0.169	0.840375	0.845523	-0.0293333	0.773688	6200000	6250000
OX359198.1	125	0.186333	0.140667	1.35935	1.36768	0.0456667	-1.20449	6250000	6300000
OX359198.1	126	0.233333	0.299667	0.896301	0.901792	-0.0663333	1.74959	6300000	6350000
OX359198.1	127	0.311667	0.287667	1.19386	1.20117	0.024	-0.633017	6350000	6400000
OX359198.1	128	0.312333	0.311333	1.03312	1.03945	0.001	-0.0263757	6400000	6450000
OX359198.1	129	0.192333	0.229	0.9354	0.941131	-0.0366667	0.96711	6450000	6500000
OX359198.1	130	0.247333	0.114333	2.21837	2.23196	0.133	-3.50797	6500000	6550000
OX359198.1	131	0.341333	0.280667	1.28074	1.28859	0.0606667	-1.60013	6550000	6600000
OX359198.1	132	0.289667	0.230667	1.42095	1.42965	0.059	-1.55617	6600000	6650000
OX359198.1	133	0.293	0.344333	0.898287	0.90379	-0.0513333	1.35395	6650000	6700000
OX359198.1	134	0.266667	0.328333	0.839892	0.845037	-0.0616667	1.6265	6700000	6750000
OX359198.1	135	0.108333	0.107	1.12556	1.13246	0.00133333	-0.0351676	6750000	6800000
OX359198.1	136	0.371667	0.291	1.4001	1.40868	0.0806667	-2.12764	6800000	6850000
OX359198.1	137	0.223667	0.241	0.978436	0.98443	-0.0173333	0.457179	6850000	6900000
OX359198.1	138	0.189333	0.263	0.728836	0.733301	-0.0736667	1.94301	6900000	6950000
OX359198.1	139	0.24	0.267333	0.980526	0.986534	-0.0273333	0.720937	6950000	7000000
OX359198.1	140	0.43	0.39	1.14411	1.15112	0.04	-1.05503	7000000	7050000
OX359198.1	141	0.322	0.330333	0.976897	0.982882	-0.00833333	0.219798	7050000	7100000
OX359198.1	142	0.393	0.346	1.19718	1.20451	0.047	-1.23966	7100000	7150000
OX359198.1	143	0.438	0.426667	1.01341	1.01962	0.0113333	-0.298925	7150000	7200000
OX359198.1	144	0.308333	0.321	1.05663	1.06311	-0.0126667	0.334093	7200000	7250000
OX359198.1	145	0.256	0.297	0.906912	0.912468	-0.041	1.0814	7250000	7300000
OX359198.1	146	0.42	0.451333	0.959748	0.965628	-0.0313333	0.826439	7300000	7350000
OX359198.1	147	0.336	0.389333	0.924916	0.930583	-0.0533333	1.40671	7350000	7400000
OX359198.1	148	0.320667	0.350667	0.958111	0.963981	-0.03	0.791272	7400000	7450000
OX359198.1	149	0.349333	0.290667	1.44014	1.44897	0.0586667	-1.54738	7450000	7500000
OX359198.1	150	0.308333	0.323333	1.04602	1.05243	-0.015	0.395636	7500000	7550000
OX359198.1	151	0.280667	0.226	1.3138	1.32185	0.0546667	-1.44187	7550000	7600000
OX359198.1	152	0.274815	0.33037	0.813331	0.818314	-0.0555556	1.46532	7600000	7650000
OX359198.1	153	0.0233333	0.0266667	0.875	0.880361	-0.00333333	0.0879191	7650000	7655000
OX359199.1	0	0.257	0.210667	1.60724	1.61709	0.0463333	-1.22208	0	50000
OX359199.1	1	0.27	0.336	0.958018	0.963887	-0.066	1.7408	50000	100000
OX359199.1	2	0.347667	0.454333	0.815721	0.820719	-0.106667	2.81341	100000	150000
OX359199.1	3	0.368667	0.414	0.903416	0.908951	-0.0453333	1.1957	150000	200000
OX359199.1	4	0.413333	0.59	0.693043	0.697289	-0.176667	4.65971	200000	250000
OX359199.1	5	0.402667	0.462	1.21279	1.22022	-0.0593333	1.56496	250000	300000
OX359199.1	6	0.342	0.491667	0.702117	0.706419	-0.149667	3.94757	300000	350000
OX359199.1	7	0.444333	0.379333	1.16969	1.17686	0.065	-1.71442	350000	400000
OX359199.1	8	0.407667	0.498667	0.79124	0.796087	-0.091	2.40019	400000	450000
OX359199.1	9	0.662667	0.615	1.07435	1.08094	0.0476667	-1.25724	450000	500000
OX359199.1	10	0.515667	0.576333	0.897873	0.903374	-0.0606667	1.60013	500000	550000
OX359199.1	11	0.384667	0.462333	0.826463	0.831526	-0.0776667	2.04851	550000	600000
OX359199.1	12	0.622	0.711667	0.919002	0.924632	-0.0896667	2.36502	600000	650000
OX359199.1	13	0.332	0.384	0.912298	0.917887	-0.052	1.37154	650000	700000
OX359199.1	14	0.224762	0.25381	0.667551	0.671641	-0.0290476	0.766152	700000	750000
OX359199.1	15	0.355	0.349583	1.15443	1.1615	0.00541667	-0.142869	750000	800000
OX359199.1	16	0.414	0.473333	0.829629	0.834712	-0.0593333	1.56496	800000	850000
OX359199.1	17	0.519667	0.518333	0.988551	0.994607	0.00133333	-0.0351676	850000	900000
OX359199.1	18	0.521667	0.560333	0.942248	0.948021	-0.0386667	1.01986	900000	950000
OX359199.1	19	0.659667	0.623667	1.08526	1.09191	0.036	-0.949526	950000	1000000
OX359199.1	20	0.401	0.449667	0.896708	0.902202	-0.0486667	1.28362	1000000	1050000
OX359199.1	21	0.518	0.651	0.767642	0.772345	-0.133	3.50797	1050000	1100000
OX359199.1	22	0.406	0.472667	0.90782	0.913381	-0.0666667	1.75838	1100000	1150000
OX359199.1	23	0.726	0.790667	0.921501	0.927147	-0.0646667	1.70563	1150000	1200000
OX359199.1	24	0.486667	0.617	0.818212	0.823225	-0.130333	3.43764	1200000	1250000
OX359199.1	25	0.720667	0.58	1.28356	1.29142	0.140667	-3.71019	1250000	1300000
OX359199.1	26	0.471	0.307333	1.41869	1.42739	0.163667	-4.31683	1300000	1350000
OX359199.1	27	0.447333	0.516	0.892697	0.898166	-0.0686667	1.81113	1350000	1400000
OX359199.1	28	0.362222	0.380741	0.937397	0.94314	-0.0185185	0.488439	1400000	1450000
OX359199.1	29	0.628667	0.537	1.15078	1.15783	0.0916667	-2.41778	1450000	1500000
OX359199.1	30	0.555667	0.618667	0.900074	0.905588	-0.063	1.66167	1500000	1550000
OX359199.1	31	0.367333	0.462667	0.771539	0.776266	-0.0953333	2.51449	1550000	1600000
OX359199.1	32	0.425667	0.368667	1.19732	1.20465	0.057	-1.50342	1600000	1650000
OX359199.1	33	0.431667	0.479667	0.90025	0.905765	-0.048	1.26603	1650000	1700000
OX359199.1	34	0.434667	0.414333	1.06885	1.0754	0.0203333	-0.536306	1700000	1750000
OX359199.1	35	0.359	0.468	0.784013	0.788816	-0.109	2.87495	1750000	1800000
OX359199.1	36	0.422	0.573	0.737412	0.74193	-0.151	3.98273	1800000	1850000
OX359199.1	37	0.293	0.340667	0.847117	0.852306	-0.0476667	1.25724	1850000	1900000
OX359199.1	38	0.552667	0.220333	3.17954	3.19902	0.332333	-8.76553	1900000	1950000
OX359199.1	39	0.511667	0.263333	1.95231	1.96427	0.248333	-6.54997	1950000	2000000
OX359199.1	40	0.619333	0.713333	0.853745	0.858975	-0.094	2.47932	2000000	2050000
OX359199.1	41	0.544	0.554333	0.971109	0.977059	-0.0103333	0.272549	2050000	2100000
OX359199.1	42	0.464	0.394	1.64287	1.65294	0.07	-1.8463	2100000	2150000
OX359199.1	43	0.189	0.294	0.725176	0.729619	-0.105	2.76945	2150000	2200000
OX359199.1	44	0.106667	0.199	0.447503	0.450245	-0.0923333	2.43536	2200000	2250000
OX359199.1	45	0.478	0.452667	1.06755	1.07409	0.0253333	-0.668185	2250000	2300000
OX359199.1	46	0.407	0.317333	1.50229	1.5115	0.0896667	-2.36502	2300000	2350000
OX359199.1	47	0.455333	0.402667	1.22477	1.23227	0.0526667	-1.38912	2350000	2400000
OX359199.1	48	0.428333	0.365333	1.66139	1.67157	0.063	-1.66167	2400000	2450000
OX359199.1	49	0.652	0.804667	0.888782	0.894227	-0.152667	4.02669	2450000	2500000
OX359199.1	50	0.551	0.583333	0.976234	0.982215	-0.0323333	0.852815	2500000	2550000
OX359199.1	51	0.362667	0.284333	1.78554	1.79648	0.0783333	-2.0661	2550000	2600000
OX359199.1	52	0.393333	0.229333	1.73436	1.74498	0.164	-4.32562	2600000	2650000
OX359199.1	53	0.509333	0.289	4.67969	4.70836	0.220333	-5.81145	2650000	2700000
OX359199.1	54	0.692333	0.169333	6.2846	6.32311	0.523	-13.7945	2700000	2750000
OX359199.1	55	0.433	0.178333	2.35204	2.36645	0.254667	-6.71702	2750000	2800000
OX359199.1	56	0.750333	0.42	1.88756	1.89912	0.330333	-8.71278	2800000	2850000
OX359199.1	57	0.330667	0.279667	1.27045	1.27824	0.051	-1.34516	2850000	2900000
OX359199.1	58	0.560333	0.195667	3.39761	3.41843	0.364667	-9.61835	2900000	2950000
OX359199.1	59	0.14	0.194	0.72558	0.730025	-0.054	1.42429	2950000	3000000
OX359199.1	60	0.061	0.0946667	0.685784	0.689986	-0.0336667	0.887983	3000000	3050000
OX359199.1	61	0.0966667	0.185667	0.477891	0.480819	-0.089	2.34744	3050000	3100000
OX359199.1	62	0.13	0.169667	0.766508	0.771204	-0.0396667	1.04624	3100000	3150000
OX359199.1	63	0.0333333	0.110333	0.288547	0.290315	-0.077	2.03093	3150000	3200000
OX359199.1	64	0.159333	0.233667	0.64582	0.649776	-0.0743333	1.9606	3200000	3250000
OX359199.1	65	0.0643333	0.130667	0.510537	0.513665	-0.0663333	1.74959	3250000	3300000
OX359199.1	66	0.0843333	0.132	0.668827	0.672925	-0.0476667	1.25724	3300000	3350000
OX359199.1	67	0.264667	0.262333	1.02651	1.0328	0.00233333	-0.0615434	3350000	3400000
OX359199.1	68	0.311667	0.319	1.16464	1.17178	-0.00733333	0.193422	3400000	3450000
OX359199.1	69	0.732333	0.74	0.963258	0.969159	-0.00766667	0.202214	3450000	3500000
OX359199.1	70	0.440667	0.449667	1.49134	1.50047	-0.009	0.237382	3500000	3550000
OX359199.1	71	0.558	0.183	6.96954	7.01224	0.375	-9.8909	3550000	3600000
OX359199.1	72	0.349	0.404333	0.807843	0.812792	-0.0553333	1.45946	3600000	3650000
OX359199.1	73	0.469667	0.409	1.15262	1.15968	0.0606667	-1.60013	3650000	3700000
OX359199.1	74	0.526	0.167667	4.35585	4.38254	0.358333	-9.4513	3700000	3750000
OX359199.1	75	0.507	0.341	3.33923	3.35969	0.166	-4.37837	3750000	3800000
OX359199.1	76	0.415333	0.176333	3.33973	3.36019	0.239	-6.3038	3800000	3850000
OX359199.1	77	0.425667	0.255	2.8574	2.87491	0.170667	-4.50146	3850000	3900000
OX359199.1	78	0.399333	0.376333	1.08115	1.08778	0.023	-0.606642	3900000	3950000
OX359199.1	79	0.268333	0.255333	1.18506	1.19232	0.013	-0.342884	3950000	4000000
OX359199.1	80	0.309333	0.350333	1.03898	1.04535	-0.041	1.0814	4000000	4050000
OX359199.1	81	0.216667	0.254667	1.0517	1.05814	-0.038	1.00228	4050000	4100000
OX359199.1	82	0.28	0.282667	1.12631	1.13321	-0.00266667	0.0703353	4100000	4150000
OX359199.1	83	0.388667	0.453	0.875348	0.880711	-0.0643333	1.69684	4150000	4200000
OX359199.1	84	0.493667	0.542	0.938563	0.944313	-0.0483333	1.27483	4200000	4250000
OX359199.1	85	0.483333	0.463	1.07741	1.08401	0.0203333	-0.536306	4250000	4300000
OX359199.1	86	0.209	0.236	0.872655	0.878001	-0.027	0.712145	4300000	4350000
OX359199.1	87	0.357667	0.218	1.72658	1.73716	0.139667	-3.68381	4350000	4400000
OX359199.1	88	0.564	0.603	0.975735	0.981713	-0.039	1.02865	4400000	4450000
OX359199.1	89	0.404333	0.482	0.804948	0.80988	-0.0776667	2.04851	4450000	4500000
OX359199.1	90	0.286333	0.322667	0.899962	0.905475	-0.0363333	0.958318	4500000	4550000
OX359199.1	91	0.255667	0.243333	1.18483	1.19209	0.0123333	-0.325301	4550000	4600000
OX359199.1	92	0.259333	0.278	1.00129	1.00742	-0.0186667	0.492347	4600000	4650000
OX359199.1	93	0.258	0.309667	0.865675	0.870978	-0.0516667	1.36275	4650000	4700000
OX359199.1	94	0.422667	0.454667	0.907304	0.912863	-0.032	0.844023	4700000	4750000
OX359199.1	95	0.342333	0.344667	1.15318	1.16025	-0.00233333	0.0615434	4750000	4800000
OX359199.1	96	0.424667	0.496667	0.91054	0.916118	-0.072	1.89905	4800000	4850000
OX359199.1	97	0.266333	0.437	0.63444	0.638327	-0.170667	4.50146	4850000	4900000
OX359199.1	98	0.408	0.531667	0.857383	0.862636	-0.123667	3.2618	4900000	4950000
OX359199.1	99	0.228333	0.292667	0.838632	0.84377	-0.0643333	1.69684	4950000	5000000
OX359199.1	100	0.258333	0.249667	1.20153	1.20889	0.00866667	-0.22859	5000000	5050000
OX359199.1	101	0.291333	0.281	1.08457	1.09122	0.0103333	-0.272549	5050000	5100000
OX359199.1	102	0.31	0.354667	0.880442	0.885836	-0.0446667	1.17812	5100000	5150000
OX359199.1	103	0.417333	0.396	1.14206	1.14905	0.0213333	-0.562682	5150000	5200000
OX359199.1	104	0.337	0.350667	0.984199	0.990228	-0.0136667	0.360468	5200000	5250000
OX359199.1	105	0.249667	0.308667	0.823655	0.828701	-0.059	1.55617	5250000	5300000
OX359199.1	106	0.17	0.215	0.785751	0.790565	-0.045	1.18691	5300000	5350000
OX359199.1	107	0.261	0.312333	0.826589	0.831653	-0.0513333	1.35395	5350000	5400000
OX359199.1	108	0.383	0.303667	1.28733	1.29521	0.0793333	-2.09247	5400000	5450000
OX359199.1	109	0.703667	0.770667	0.923705	0.929364	-0.067	1.76717	5450000	5500000
OX359199.1	110	0.484	0.404	1.20566	1.21304	0.08	-2.11006	5500000	5550000
OX359199.1	111	0.340333	0.272667	1.31841	1.32649	0.0676667	-1.78476	5550000	5600000
OX359199.1	112	0.23	0.242	0.95313	0.958969	-0.012	0.316509	5600000	5650000
OX359199.1	113	0.366667	0.311667	1.17487	1.18207	0.055	-1.45067	5650000	5700000
OX359199.1	114	0.62	0.642667	1.00056	1.00669	-0.0226667	0.59785	5700000	5750000
OX359199.1	115	0.493333	0.521333	0.940497	0.946259	-0.028	0.73852	5750000	5800000
OX359199.1	116	0.556	0.580667	1.02677	1.03306	-0.0246667	0.650601	5800000	5850000
OX359199.1	117	0.472333	0.407667	1.22825	1.23578	0.0646667	-1.70563	5850000	5900000
OX359199.1	118	0.438	0.385333	1.25817	1.26588	0.0526667	-1.38912	5900000	5950000
OX359199.1	119	0.340333	0.316333	1.46649	1.47548	0.024	-0.633017	5950000	6000000
OX359199.1	120	0.436	0.503667	0.87695	0.882322	-0.0676667	1.78476	6000000	6050000
OX359199.1	121	0.45	0.677667	0.805765	0.810702	-0.227667	6.00487	6050000	6100000
OX359199.1	122	0.174667	0.225	0.806714	0.811656	-0.0503333	1.32758	6100000	6150000
OX359199.1	123	0.265667	0.321667	0.886656	0.892088	-0.056	1.47704	6150000	6200000
OX359199.1	124	0.436667	0.514667	0.818225	0.823237	-0.078	2.05731	6200000	6250000
OX359199.1	125	0.479	0.562333	0.884292	0.88971	-0.0833333	2.19798	6250000	6300000
OX359199.1	126	0.522	0.582667	0.861355	0.866632	-0.0606667	1.60013	6300000	6350000
OX359199.1	127	0.448667	0.400667	1.11393	1.12076	0.048	-1.26603	6350000	6400000
OX359199.1	128	0.420333	0.357333	1.23745	1.24503	0.063	-1.66167	6400000	6450000
OX359199.1	129	0.296667	0.421	0.72755	0.732007	-0.124333	3.27938	6450000	6500000
OX359199.1	130	0.31	0.391	0.810572	0.815538	-0.081	2.13643	6500000	6550000
OX359199.1	131	0.333333	0.376333	0.887719	0.893157	-0.043	1.13416	6550000	6600000
OX359199.1	132	0.158333	0.192	0.909976	0.915551	-0.0336667	0.887983	6600000	6650000
OX359199.1	133	0.137	0.242667	0.64802	0.651991	-0.105667	2.78704	6650000	6700000
OX359199.1	134	0.163667	0.201333	1.12038	1.12724	-0.0376667	0.993486	6700000	6750000
OX359199.1	135	0.213667	0.236333	0.894729	0.900211	-0.0226667	0.59785	6750000	6800000
OX359199.1	136	0.153333	0.246333	1.09445	1.10116	-0.093	2.45294	6800000	6850000
OX359199.1	137	0.153	0.223667	0.684659	0.688853	-0.0706667	1.86388	6850000	6900000
OX359199.1	138	0.223	0.187	1.21712	1.22458	0.036	-0.949526	6900000	6950000
OX359199.1	139	0.324	0.322667	1.02956	1.03587	0.00133333	-0.0351676	6950000	7000000
OX359199.1	140	0.285667	0.269667	1.10484	1.11161	0.016	-0.422012	7000000	7050000
OX359199.1	141	0.248	0.218667	1.22129	1.22877	0.0293333	-0.773688	7050000	7100000
OX359199.1	142	0.345	0.264667	1.35758	1.36589	0.0803333	-2.11885	7100000	7150000
OX359199.1	143	0.285	0.200333	1.54236	1.55181	0.0846667	-2.23314	7150000	7200000
OX359199.1	144	0.280333	0.318667	1.00144	1.00757	-0.0383333	1.01107	7200000	7250000
OX359199.1	145	0.238	0.286667	0.940329	0.946089	-0.0486667	1.28362	7250000	7300000
OX359199.1	146	0.390667	0.417	0.960533	0.966417	-0.0263333	0.694561	7300000	7350000
OX359199.1	147	0.472333	0.578667	0.818901	0.823918	-0.106333	2.80462	7350000	7400000
OX359199.1	148	0.224333	0.299	0.750657	0.755256	-0.0746667	1.96939	7400000	7450000
OX359199.1	149	0.246333	0.295333	0.864559	0.869856	-0.049	1.29241	7450000	7500000
OX359199.1	150	0.196	0.251667	0.771677	0.776404	-0.0556667	1.46825	7500000	7550000
OX359199.1	151	0.310333	0.298333	1.44701	1.45588	0.012	-0.316509	7550000	7600000
OX359199.1	152	0.246667	0.0938889	2.89749	2.91525	0.152778	-4.02963	7600000	7630000
OX359200.1	0	0.204667	0.221333	0.87122	0.876557	-0.0166667	0.439595	0	50000
OX359200.1	1	0.265667	0.290667	0.96427	0.970177	-0.025	0.659393	50000	100000
OX359200.1	2	0.217333	0.215667	0.964187	0.970094	0.00166667	-0.0439595	100000	150000
OX359200.1	3	0.201	0.218667	0.852357	0.857579	-0.0176667	0.465971	150000	200000
OX359200.1	4	0.234	0.289	0.80177	0.806682	-0.055	1.45067	200000	250000
OX359200.1	5	0.302333	0.281	1.24444	1.25207	0.0213333	-0.562682	250000	300000
OX359200.1	6	0.305333	0.344667	0.906308	0.91186	-0.0393333	1.03745	300000	350000
OX359200.1	7	0.232667	0.225667	1.06746	1.074	0.007	-0.18463	350000	400000
OX359200.1	8	0.322667	0.259333	1.3372	1.34539	0.0633333	-1.67046	400000	450000
OX359200.1	9	0.291667	0.324	0.954747	0.960596	-0.0323333	0.852815	450000	500000
OX359200.1	10	0.276333	0.337667	0.843003	0.848167	-0.0613333	1.61771	500000	550000
OX359200.1	11	0.448	0.639333	0.720202	0.724615	-0.191333	5.04656	550000	600000
OX359200.1	12	0.412	0.452	0.974248	0.980217	-0.04	1.05503	600000	650000
OX359200.1	13	0.283	0.317	0.9399	0.945658	-0.034	0.896775	650000	700000
OX359200.1	14	0.239333	0.329667	0.68469	0.688884	-0.0903333	2.38261	700000	750000
OX359200.1	15	0.527667	0.660333	0.791128	0.795975	-0.132667	3.49918	750000	800000
OX359200.1	16	0.407333	0.389333	1.06455	1.07107	0.018	-0.474763	800000	850000
OX359200.1	17	0.348667	0.324	1.13063	1.13756	0.0246667	-0.650601	850000	900000
OX359200.1	18	0.304	0.427	0.784134	0.788938	-0.123	3.24421	900000	950000
OX359200.1	19	0.306333	0.522333	0.607971	0.611696	-0.216	5.69716	950000	1000000
OX359200.1	20	0.36	0.425	0.89955	0.905062	-0.065	1.71442	1000000	1050000
OX359200.1	21	0.676	0.758333	0.892114	0.897579	-0.0823333	2.1716	1050000	1100000
OX359200.1	22	0.469333	0.433333	1.13113	1.13806	0.036	-0.949526	1100000	1150000
OX359200.1	23	0.325	0.272667	1.21636	1.22381	0.0523333	-1.38033	1150000	1200000
OX359200.1	24	0.356667	0.409333	0.907188	0.912746	-0.0526667	1.38912	1200000	1250000
OX359200.1	25	0.332667	0.392667	0.895095	0.900578	-0.06	1.58254	1250000	1300000
OX359200.1	26	0.429	0.546	0.79169	0.79654	-0.117	3.08596	1300000	1350000
OX359200.1	27	0.314667	0.401	0.78794	0.792767	-0.0863333	2.2771	1350000	1400000
OX359200.1	28	0.399	0.422667	1.04281	1.0492	-0.0236667	0.624226	1400000	1450000
OX359200.1	29	0.224	0.246667	1.19416	1.20147	-0.0226667	0.59785	1450000	1500000
OX359200.1	30	0.223	0.261667	1.33998	1.34818	-0.0386667	1.01986	1500000	1550000
OX359200.1	31	0.498667	0.497333	0.999961	1.00609	0.00133333	-0.0351676	1550000	1600000
OX359200.1	32	0.370667	0.408667	0.892719	0.898188	-0.038	1.00228	1600000	1650000
OX359200.1	33	0.360667	0.417667	0.879345	0.884732	-0.057	1.50342	1650000	1700000
OX359200.1	34	0.486	0.491333	0.970752	0.976699	-0.00533333	0.140671	1700000	1750000
OX359200.1	35	0.529333	0.604667	0.854676	0.859912	-0.0753333	1.98697	1750000	1800000
OX359200.1	36	0.460667	0.554333	0.80712	0.812065	-0.0936667	2.47053	1800000	1850000
OX359200.1	37	0.278333	0.365667	0.816473	0.821475	-0.0873333	2.30348	1850000	1900000
OX359200.1	38	0.443	0.598333	0.72836	0.732822	-0.155333	4.09703	1900000	1950000
OX359200.1	39	0.472667	0.700667	0.660574	0.664621	-0.228	6.01367	1950000	2000000
OX359200.1	40	0.541667	0.555667	0.978228	0.984221	-0.014	0.36926	2000000	2050000
OX359200.1	41	0.45	0.506333	0.927803	0.933487	-0.0563333	1.48583	2050000	2100000
OX359200.1	42	0.328	0.375	0.948437	0.954248	-0.047	1.23966	2100000	2150000
OX359200.1	43	0.518	0.647333	0.780855	0.785638	-0.129333	3.41126	2150000	2200000
OX359200.1	44	0.594	0.602333	0.98724	0.993288	-0.00833333	0.219798	2200000	2250000
OX359200.1	45	0.307	0.341333	0.913803	0.919401	-0.0343333	0.905567	2250000	2300000
OX359200.1	46	0.302	0.214	1.44145	1.45028	0.088	-2.32106	2300000	2350000
OX359200.1	47	0.250667	0.14	1.86129	1.8727	0.110667	-2.91891	2350000	2400000
OX359200.1	48	0.283	0.229333	1.39419	1.40274	0.0536667	-1.4155	2400000	2450000
OX359200.1	49	0.364667	0.294667	1.7234	1.73396	0.07	-1.8463	2450000	2500000
OX359200.1	50	0.286333	0.143667	2.32672	2.34097	0.142667	-3.76294	2500000	2550000
OX359200.1	51	0.543333	0.377333	1.51752	1.52681	0.166	-4.37837	2550000	2600000
OX359200.1	52	0.266667	0.208333	1.36597	1.37434	0.0583333	-1.53858	2600000	2650000
OX359200.1	53	0.183333	0.138333	1.44144	1.45027	0.045	-1.18691	2650000	2700000
OX359200.1	54	0.279	0.217333	1.34748	1.35573	0.0616667	-1.6265	2700000	2750000
OX359200.1	55	0.298	0.202	1.48564	1.49474	0.096	-2.53207	2750000	2800000
OX359200.1	56	0.327667	0.231	1.50255	1.51176	0.0966667	-2.54965	2800000	2850000
OX359200.1	57	0.21	0.246	0.783138	0.787936	-0.036	0.949526	2850000	2900000
OX359200.1	58	0.261667	0.239	1.00336	1.00951	0.0226667	-0.59785	2900000	2950000
OX359200.1	59	0.153667	0.186333	0.86194	0.867221	-0.0326667	0.861607	2950000	3000000
OX359200.1	60	0.102333	0.168333	0.625856	0.62969	-0.066	1.7408	3000000	3050000
OX359200.1	61	0.155333	0.185333	0.771449	0.776175	-0.03	0.791272	3050000	3100000
OX359200.1	62	0.202	0.196	1.00437	1.01053	0.006	-0.158254	3100000	3150000
OX359200.1	63	0.223	0.205	1.06279	1.06931	0.018	-0.474763	3150000	3200000
OX359200.1	64	0.286	0.280333	1.02404	1.03032	0.00566667	-0.149462	3200000	3250000
OX359200.1	65	0.283	0.343333	0.810286	0.815251	-0.0603333	1.59134	3250000	3300000
OX359200.1	66	0.221667	0.293667	0.720492	0.724906	-0.072	1.89905	3300000	3350000
OX359200.1	67	0.136333	0.209333	0.638397	0.642308	-0.073	1.92543	3350000	3400000
OX359200.1	68	0.0620833	0.145	0.443021	0.445735	-0.0829167	2.18699	3400000	3440000
OX359200.1	69	0.04	0.1	0.418184	0.420746	-0.06	1.58254	3485000	3500000
[truncated: 354 more rows]

## Sheet: Chren_alternate
chr	range	heterogametic	homogametic	ratio	ratio_scaled	diff	diff_scaled	start	end	diff_genome_mean	diff_genome_sd
CAMWBO010000001.1	21	0.539	0.744333	0.720685	0.717212	-0.205333	5.13545	1050000	1100000	-0.040037	0.0790138
CAMWBO010000001.1	30	0.378	0.254333	1.62204	1.61423	0.123667	-3.09294	1500000	1550000	-0.040037	0.0790138
CAMWBO010000001.1	46	0.439333	0.745667	0.582761	0.579954	-0.306333	7.66149	2300000	2350000	-0.040037	0.0790138
CAMWBO010000001.1	64	0.305333	0.113	3.30643	3.2905	0.192333	-4.81032	3200000	3250000	-0.040037	0.0790138
CAMWBO010000001.1	66	0.287333	0.121667	3.03038	3.01578	0.165667	-4.14338	3300000	3350000	-0.040037	0.0790138
CAMWBO010000001.1	67	0.307667	0.123333	2.69121	2.67825	0.184333	-4.61024	3350000	3400000	-0.040037	0.0790138
CAMWBO010000001.1	89	0.34	0.125	2.86344	2.84965	0.215	-5.37722	4450000	4500000	-0.040037	0.0790138
CAMWBO010000001.1	90	0.300667	0.135	2.5742	2.5618	0.165667	-4.14338	4500000	4550000	-0.040037	0.0790138
CAMWBO010000001.1	92	0.215667	0.0686667	4.3416	4.32068	0.147	-3.67652	4600000	4650000	-0.040037	0.0790138
CAMWBO010000001.1	94	0.344667	0.205	2.10546	2.09532	0.139667	-3.49311	4700000	4750000	-0.040037	0.0790138
CAMWBO010000001.1	106	0.232	0.471	0.484003	0.481671	-0.239	5.97747	5300000	5350000	-0.040037	0.0790138
CAMWBO010000001.1	107	0.162667	0.365667	0.442466	0.440334	-0.203	5.07709	5350000	5400000	-0.040037	0.0790138
CAMWBO010000001.1	118	0.430667	0.288333	1.51265	1.50537	0.142333	-3.5598	5900000	5950000	-0.040037	0.0790138
CAMWBO010000001.1	126	0.478667	0.708667	0.695752	0.6924	-0.23	5.75237	6300000	6350000	-0.040037	0.0790138
CAMWBO010000001.1	127	0.415333	0.775333	0.528094	0.52555	-0.36	9.00371	6350000	6400000	-0.040037	0.0790138
CAMWBO010000001.1	163	0.296333	0.501	0.562727	0.560016	-0.204667	5.11878	8150000	8200000	-0.040037	0.0790138
CAMWBO010000001.1	168	0.245333	0.455667	0.528427	0.525881	-0.210333	5.2605	8400000	8450000	-0.040037	0.0790138
CAMWBO010000001.1	173	0.553333	0.414333	1.36089	1.35434	0.139	-3.47643	8650000	8700000	-0.040037	0.0790138
CAMWBO010000002.1	73	0.235333	0.438333	0.594421	0.591557	-0.203	5.07709	3650000	3700000	-0.040037	0.0790138
CAMWBO010000002.1	137	0.418667	0.690667	0.65341	0.650262	-0.272	6.80281	6850000	6900000	-0.040037	0.0790138
CAMWBO010000002.1	148	0.628667	0.468	1.40691	1.40013	0.160667	-4.01832	7400000	7450000	-0.040037	0.0790138
CAMWBO010000002.1	149	0.407667	0.624	0.678767	0.675497	-0.216333	5.41057	7450000	7500000	-0.040037	0.0790138
CAMWBO010000002.1	169	0.398667	0.634	0.645996	0.642883	-0.235333	5.88576	8450000	8500000	-0.040037	0.0790138
CAMWBO010000002.1	190	0.433667	0.642667	0.66301	0.659815	-0.209	5.22716	9500000	9550000	-0.040037	0.0790138
CAMWBO010000003.1	38	0.546	0.816	0.654528	0.651375	-0.27	6.75279	1900000	1950000	-0.040037	0.0790138
CAMWBO010000003.1	39	0.381	0.579333	0.655035	0.651879	-0.198333	4.96038	1950000	2000000	-0.040037	0.0790138
CAMWBO010000003.1	54	0.554667	0.858	0.664738	0.661535	-0.303333	7.58646	2700000	2750000	-0.040037	0.0790138
CAMWBO010000003.1	56	0.355	0.758	0.464011	0.461775	-0.403	10.0792	2800000	2850000	-0.040037	0.0790138
CAMWBO010000003.1	59	0.485	0.694667	0.710786	0.707362	-0.209667	5.24383	2950000	3000000	-0.040037	0.0790138
CAMWBO010000003.1	77	0.404	0.250667	2.04967	2.0398	0.153333	-3.83492	3850000	3900000	-0.040037	0.0790138
CAMWBO010000003.1	78	0.409333	0.230333	2.08058	2.07056	0.179	-4.47685	3900000	3950000	-0.040037	0.0790138
CAMWBO010000003.1	79	0.371333	0.230667	1.81522	1.80648	0.140667	-3.51812	3950000	4000000	-0.040037	0.0790138
CAMWBO010000003.1	115	0.505333	0.733667	0.684662	0.681363	-0.228333	5.71069	5750000	5800000	-0.040037	0.0790138
CAMWBO010000003.1	116	0.386	0.593333	0.621075	0.618082	-0.207333	5.18547	5800000	5850000	-0.040037	0.0790138
CAMWBO010000003.1	117	0.537667	0.775333	0.710876	0.707451	-0.237667	5.94412	5850000	5900000	-0.040037	0.0790138
CAMWBO010000003.1	143	0.404333	0.254	2.01631	2.00659	0.150333	-3.75988	7150000	7200000	-0.040037	0.0790138
CAMWBO010000003.1	168	0.576333	0.832333	0.69676	0.693403	-0.256	6.40264	8400000	8450000	-0.040037	0.0790138
CAMWBO010000004.1	62	0.510667	0.329333	1.7359	1.72754	0.181333	-4.5352	3100000	3150000	-0.040037	0.0790138
CAMWBO010000004.1	67	0.445333	0.697	0.877407	0.87318	-0.251667	6.29426	3350000	3400000	-0.040037	0.0790138
CAMWBO010000004.1	94	0.223667	0.442	0.495775	0.493386	-0.218333	5.46059	4700000	4750000	-0.040037	0.0790138
CAMWBO010000004.1	112	0.317	0.545333	0.54799	0.54535	-0.228333	5.71069	5600000	5650000	-0.040037	0.0790138
CAMWBO010000004.1	113	0.282	0.562667	0.490545	0.488182	-0.280667	7.01956	5650000	5700000	-0.040037	0.0790138
CAMWBO010000005.1	101	0.490667	0.338333	1.48903	1.48186	0.152333	-3.80991	5050000	5100000	-0.040037	0.0790138
CAMWBO010000005.1	102	0.463667	0.317	1.60992	1.60216	0.146667	-3.66818	5100000	5150000	-0.040037	0.0790138
CAMWBO010000005.1	136	0.479667	0.683667	0.710519	0.707096	-0.204	5.1021	6800000	6850000	-0.040037	0.0790138
CAMWBO010000006.1	39	0.629667	0.836333	0.759878	0.756217	-0.206667	5.1688	1950000	2000000	-0.040037	0.0790138
CAMWBO010000006.1	52	0.444	0.298333	1.65307	1.64511	0.145667	-3.64317	2600000	2650000	-0.040037	0.0790138
CAMWBO010000006.1	78	0.707667	0.575333	1.28531	1.27912	0.132333	-3.3097	3900000	3950000	-0.040037	0.0790138
CAMWBO010000006.1	84	0.602	0.478	1.30174	1.29547	0.124	-3.10128	4200000	4250000	-0.040037	0.0790138
CAMWBO010000006.1	88	0.746333	0.599	1.26864	1.26253	0.147333	-3.68485	4400000	4450000	-0.040037	0.0790138
CAMWBO010000006.1	100	0.698333	0.558667	1.27765	1.27149	0.139667	-3.49311	5000000	5050000	-0.040037	0.0790138
CAMWBO010000006.1	101	0.717333	0.533667	1.34117	1.3347	0.183667	-4.59356	5050000	5100000	-0.040037	0.0790138
CAMWBO010000006.1	130	0.455333	0.305	1.52825	1.52089	0.150333	-3.75988	6500000	6550000	-0.040037	0.0790138
CAMWBO010000006.1	131	0.724	0.602	1.37396	1.36734	0.122	-3.05126	6550000	6600000	-0.040037	0.0790138
CAMWBO010000008.1	4	0.329667	0.159667	2.38147	2.36999	0.17	-4.25175	200000	250000	-0.040037	0.0790138
CAMWBO010000008.1	25	0.350667	0.563667	0.614142	0.611183	-0.213	5.3272	1250000	1300000	-0.040037	0.0790138
CAMWBO010000008.1	83	0.462667	0.677	0.676361	0.673102	-0.214333	5.36054	4150000	4200000	-0.040037	0.0790138
CAMWBO010000008.1	105	0.343	0.560667	0.612849	0.609896	-0.217667	5.44391	5250000	5300000	-0.040037	0.0790138
CAMWBO010000009.1	91	0.639667	0.476667	1.40377	1.397	0.163	-4.07668	4550000	4600000	-0.040037	0.0790138
CAMWBO010000009.1	105	0.292	0.536667	0.526742	0.524204	-0.244667	6.11919	5250000	5300000	-0.040037	0.0790138
CAMWBO010000009.1	135	0.344333	0.162333	2.28198	2.27098	0.182	-4.55188	6750000	6800000	-0.040037	0.0790138
CAMWBO010000009.1	155	0.380667	0.262	1.63908	1.63118	0.118667	-2.96789	7750000	7800000	-0.040037	0.0790138
CAMWBO010000010.1	34	0.348667	0.214333	1.71171	1.70346	0.134333	-3.35972	1700000	1750000	-0.040037	0.0790138
CAMWBO010000010.1	57	0.375333	0.216	1.72824	1.71992	0.159333	-3.98498	2850000	2900000	-0.040037	0.0790138
CAMWBO010000010.1	84	0.253	0.496	0.497353	0.494957	-0.243	6.07751	4200000	4250000	-0.040037	0.0790138
CAMWBO010000010.1	85	0.173667	0.373667	0.477364	0.475064	-0.2	5.00206	4250000	4300000	-0.040037	0.0790138
CAMWBO010000010.1	86	0.276667	0.553333	0.491699	0.48933	-0.276667	6.91952	4300000	4350000	-0.040037	0.0790138
CAMWBO010000010.1	90	0.647667	0.506667	1.3075	1.3012	0.141	-3.52645	4500000	4550000	-0.040037	0.0790138
CAMWBO010000010.1	147	0.583333	0.785333	0.752001	0.748378	-0.202	5.05208	7350000	7400000	-0.040037	0.0790138
CAMWBO010000011.1	7	0.473667	0.306667	1.51471	1.50741	0.167	-4.17672	350000	400000	-0.040037	0.0790138
CAMWBO010000011.1	31	0.261	0.533	0.560089	0.55739	-0.272	6.80281	1550000	1600000	-0.040037	0.0790138
CAMWBO010000011.1	47	0.145333	0.352333	0.452711	0.45053	-0.207	5.17714	2350000	2400000	-0.040037	0.0790138
CAMWBO010000011.1	56	0.269259	0.149259	2.50993	2.49784	0.12	-3.00124	2800000	2850000	-0.040037	0.0790138
CAMWBO010000011.1	90	0.285333	0.154333	1.88019	1.87114	0.131	-3.27635	4500000	4550000	-0.040037	0.0790138
CAMWBO010000011.1	92	0.440667	0.246667	2.23265	2.22189	0.194	-4.852	4600000	4650000	-0.040037	0.0790138
CAMWBO010000011.1	102	0.591333	0.381	1.9172	1.90797	0.210333	-5.2605	5100000	5150000	-0.040037	0.0790138
CAMWBO010000011.1	106	0.771667	0.572	1.57986	1.57224	0.199667	-4.99373	5300000	5350000	-0.040037	0.0790138
CAMWBO010000011.1	112	0.518667	0.366333	18.8528	18.762	0.152333	-3.80991	5600000	5650000	-0.040037	0.0790138
CAMWBO010000011.1	116	0.420667	0.295333	1.94548	1.93611	0.125333	-3.13463	5800000	5850000	-0.040037	0.0790138
CAMWBO010000011.1	138	0.482667	0.684667	0.713961	0.710521	-0.202	5.05208	6900000	6950000	-0.040037	0.0790138
CAMWBO010000011.1	158	0.481667	0.309333	1.64986	1.64191	0.172333	-4.31011	7900000	7950000	-0.040037	0.0790138
CAMWBO010000012.1	0	0.310667	0.166667	1.8192	1.81044	0.144	-3.60149	0	50000	-0.040037	0.0790138
CAMWBO010000012.1	7	0.310667	0.155	3.03541	3.02078	0.155667	-3.89327	350000	400000	-0.040037	0.0790138
CAMWBO010000012.1	34	0.278333	0.516667	0.560475	0.557775	-0.238333	5.96079	1700000	1750000	-0.040037	0.0790138
CAMWBO010000012.1	59	0.469667	0.312667	1.51948	1.51216	0.157	-3.92662	2950000	3000000	-0.040037	0.0790138
CAMWBO010000012.1	63	0.373	0.200667	1.89625	1.88711	0.172333	-4.31011	3150000	3200000	-0.040037	0.0790138
CAMWBO010000013.1	10	0.424333	0.626	0.65704	0.653874	-0.201667	5.04375	500000	550000	-0.040037	0.0790138
CAMWBO010000013.1	56	0.651	0.474	1.40519	1.39842	0.177	-4.42683	2800000	2850000	-0.040037	0.0790138
CAMWBO010000013.1	113	0.254074	0.112222	3.92538	3.90647	0.141852	-3.54776	5650000	5700000	-0.040037	0.0790138
CAMWBO010000013.1	114	0.290667	0.164333	10.7498	10.698	0.126333	-3.15964	5700000	5750000	-0.040037	0.0790138
CAMWBO010000013.1	115	0.388667	0.253333	1.72117	1.71288	0.135333	-3.38473	5750000	5800000	-0.040037	0.0790138
CAMWBO010000013.1	116	0.569333	0.421667	1.44029	1.43335	0.147667	-3.69319	5800000	5850000	-0.040037	0.0790138
CAMWBO010000013.1	127	0.865	0.724667	1.2734	1.26727	0.140333	-3.50978	6350000	6400000	-0.040037	0.0790138
CAMWBO010000013.1	142	0.253667	0.459	0.529621	0.527069	-0.205333	5.13545	7100000	7150000	-0.040037	0.0790138
CAMWBO010000013.1	147	0.401667	0.643333	0.672858	0.669616	-0.241667	6.04416	7350000	7400000	-0.040037	0.0790138
CAMWBO010000013.1	160	0.512667	0.72	0.746996	0.743397	-0.207333	5.18547	8000000	8050000	-0.040037	0.0790138
CAMWBO010000014.1	0	0.279667	0.142333	3.28782	3.27198	0.137333	-3.43475	0	50000	-0.040037	0.0790138
CAMWBO010000014.1	56	0.296667	0.518	0.592804	0.589948	-0.221333	5.53562	2800000	2850000	-0.040037	0.0790138
CAMWBO010000014.1	79	0.437667	0.187667	3.27873	3.26293	0.25	-6.25258	3950000	4000000	-0.040037	0.0790138
CAMWBO010000014.1	80	0.536667	0.318333	3.09331	3.0784	0.218333	-5.46059	4000000	4050000	-0.040037	0.0790138
CAMWBO010000014.1	81	0.745	0.53	1.66739	1.65936	0.215	-5.37722	4050000	4100000	-0.040037	0.0790138
CAMWBO010000014.1	84	0.593	0.182333	7.14679	7.11235	0.410667	-10.2709	4200000	4250000	-0.040037	0.0790138
CAMWBO010000014.1	94	0.445	0.178667	2.59257	2.58008	0.266333	-6.66108	4700000	4750000	-0.040037	0.0790138
CAMWBO010000014.1	96	0.442667	0.193	2.60188	2.58934	0.249667	-6.24424	4800000	4850000	-0.040037	0.0790138
CAMWBO010000014.1	97	0.598	0.304333	1.82859	1.81978	0.293667	-7.3447	4850000	4900000	-0.040037	0.0790138
CAMWBO010000014.1	98	0.646667	0.166667	5.03354	5.00929	0.48	-12.005	4900000	4950000	-0.040037	0.0790138
CAMWBO010000014.1	99	0.591333	0.149333	10.8383	10.7861	0.442	-11.0546	4950000	5000000	-0.040037	0.0790138
CAMWBO010000014.1	100	0.485667	0.235667	2.12503	2.1148	0.25	-6.25258	5000000	5050000	-0.040037	0.0790138
CAMWBO010000014.1	101	0.308667	0.181667	2.19328	2.18271	0.127	-3.17631	5050000	5100000	-0.040037	0.0790138
CAMWBO010000014.1	112	0.686	0.456	2.19643	2.18585	0.23	-5.75237	5600000	5650000	-0.040037	0.0790138
CAMWBO010000014.1	115	0.646667	0.217	3.61399	3.59657	0.429667	-10.7461	5750000	5800000	-0.040037	0.0790138
CAMWBO010000014.1	126	0.750333	0.601	1.32618	1.31979	0.149333	-3.73487	6300000	6350000	-0.040037	0.0790138
CAMWBO010000015.1	46	0.565	0.783333	0.718092	0.714632	-0.218333	5.46059	2300000	2350000	-0.040037	0.0790138
CAMWBO010000015.1	50	0.411	0.626333	0.652291	0.649149	-0.215333	5.38556	2500000	2550000	-0.040037	0.0790138
CAMWBO010000015.1	92	0.456667	0.678	0.643917	0.640814	-0.221333	5.53562	4600000	4650000	-0.040037	0.0790138
CAMWBO010000015.1	94	0.487333	0.723333	0.696803	0.693446	-0.236	5.90244	4700000	4750000	-0.040037	0.0790138
CAMWBO010000015.1	139	0.353333	0.203333	2.33871	2.32744	0.15	-3.75155	6950000	7000000	-0.040037	0.0790138
CAMWBO010000017.1	5	0.542667	0.742333	0.714521	0.711078	-0.199667	4.99373	250000	300000	-0.040037	0.0790138
CAMWBO010000017.1	14	0.620667	0.845333	0.705939	0.702538	-0.224667	5.61898	700000	750000	-0.040037	0.0790138
CAMWBO010000017.1	47	0.631333	0.875	0.728918	0.725406	-0.243667	6.09418	2350000	2400000	-0.040037	0.0790138

## Sheet: Hapan.difHeterozygosity.50000bp
.chr	range	heterogametic	homogametic	ratio	ratio_scaled	diff	diff_scaled	start	end
CAVLYH010000005.1	0	0.374167	0.119167	7.14139	5.29514	0.255	151.939	10000	50000
CAVLYH010000005.1	1	0.406667	0.231333	2.55478	1.8943	0.175333	104.471	50000	100000
CAVLYH010000005.1	2	0.176667	0.154444	1.38898	1.02989	0.0222222	13.2409	100000	140000
CAVLYH010000011.1	0	0.382222	0.347407	3.88151	2.87803	0.0348148	20.7441	0	50000
CAVLYH010000011.1	1	0.326667	0.311667	0.911692	0.675994	0.015	8.93762	50000	90000
OY776060.1	0	0.268148	0.261481	0.862035	0.639175	0.00666667	3.97227	0	50000
OY776060.1	1	0.42	0.390667	0.870774	0.645655	0.0293333	17.478	50000	85000
OY776060.1	2	0.5675	0.451667	1.19588	0.886714	0.115833	69.0183	100000	150000
OY776060.1	3	0.362	0.338667	1.08584	0.80512	0.0233333	13.903	150000	200000
OY776060.1	4	0.320667	0.319333	1.01524	0.752775	0.00133333	0.794455	200000	250000
OY776060.1	5	0.377778	0.385185	1.17755	0.873119	-0.00740741	-4.41364	255000	300000
OY776060.1	6	0.344	0.372	0.951933	0.705832	-0.028	-16.6836	300000	350000
OY776060.1	7	0.474	0.476667	1.04137	0.772149	-0.00266667	-1.58891	350000	400000
OY776060.1	8	0.422667	0.396	1.05147	0.779632	0.0266667	15.8891	400000	450000
OY776060.1	9	0.436667	0.39	1.39195	1.03209	0.0466667	27.8059	450000	500000
OY776060.1	10	0.39	0.384	1.01782	0.754686	0.006	3.57505	500000	550000
OY776060.1	11	0.461333	0.448	0.970661	0.719718	0.0133333	7.94455	550000	600000
OY776060.1	12	0.378	0.351333	1.0882	0.806873	0.0266667	15.8891	600000	650000
OY776060.1	13	0.442667	0.451333	1.0261	0.760821	-0.00866667	-5.16396	650000	700000
OY776060.1	14	0.598	0.555333	1.06547	0.790019	0.0426667	25.4226	700000	750000
OY776060.1	15	0.476	0.462667	1.00159	0.742651	0.0133333	7.94455	750000	800000
OY776060.1	16	0.471333	0.499333	0.982733	0.728669	-0.028	-16.6836	800000	850000
OY776060.1	17	0.431333	0.384667	1.22367	0.907319	0.0466667	27.8059	850000	900000
OY776060.1	18	0.415	0.446667	0.963725	0.714575	-0.0316667	-18.8683	900000	940000
OY776060.1	19	0.36	0.383333	0.94627	0.701633	-0.0233333	-13.903	955000	1000000
OY776060.1	20	0.377333	0.437333	0.874022	0.648063	-0.06	-35.7505	1000000	1050000
OY776060.1	21	0.562667	0.422	3.87279	2.87156	0.140667	83.815	1050000	1100000
OY776060.1	22	0.417333	0.364	1.24611	0.923954	0.0533333	31.7782	1100000	1150000
OY776060.1	23	0.771333	0.826	0.936593	0.694457	-0.0546667	-32.5726	1150000	1200000
OY776060.1	24	0.468667	0.462	1.06177	0.787269	0.00666667	3.97227	1200000	1250000
OY776060.1	25	0.586667	0.542	1.06337	0.788462	0.0446667	26.6142	1250000	1300000
OY776060.1	26	0.448667	0.403333	1.06984	0.793253	0.0453333	27.0115	1300000	1350000
OY776060.1	27	0.562667	0.498	1.11656	0.827899	0.0646667	38.5311	1350000	1400000
OY776060.1	28	0.322222	0.276667	1.21302	0.899417	0.0455556	27.1439	1400000	1445000
OY776060.1	29	0.458519	0.402222	1.14023	0.845447	0.0562963	33.5436	1455000	1500000
OY776060.1	30	0.42	0.354667	1.17756	0.87313	0.0653333	38.9283	1500000	1550000
OY776060.1	31	0.398	0.347333	1.16296	0.862302	0.0506667	30.1893	1550000	1600000
OY776060.1	32	0.558	0.517333	1.10303	0.817863	0.0406667	24.2309	1600000	1650000
OY776060.1	33	0.717333	0.717333	1.26597	0.938685	4.51028e-17	2.65576e-14	1650000	1700000
OY776060.1	34	0.49	0.395333	1.33529	0.990084	0.0946667	56.4063	1700000	1750000
OY776060.1	35	0.608667	0.508667	1.23	0.912009	0.1	59.5841	1750000	1800000
OY776060.1	36	0.6	0.485333	1.31107	0.972119	0.114667	68.3231	1800000	1850000
OY776060.1	37	0.345333	0.337333	0.985083	0.730411	0.008	4.76673	1850000	1900000
OY776060.1	38	0.512667	0.418667	1.25906	0.93356	0.094	56.0091	1900000	1950000
OY776060.1	39	0.450667	0.436	1.07517	0.797209	0.0146667	8.739	1950000	2000000
OY776060.1	40	0.600667	0.588	1.02969	0.763483	0.0126667	7.54732	2000000	2050000
OY776060.1	41	0.423333	0.427333	1.06422	0.789091	-0.004	-2.38336	2050000	2100000
OY776060.1	42	0.501333	0.419333	1.20293	0.89194	0.082	48.859	2100000	2150000
OY776060.1	43	0.468148	0.408889	1.16211	0.861673	0.0592593	35.3091	2150000	2200000
OY776060.1	44	0.5	0.440667	1.13368	0.840589	0.0593333	35.3532	2200000	2250000
OY776060.1	45	0.556667	0.512667	1.12432	0.833655	0.044	26.217	2250000	2300000
OY776060.1	46	0.307333	0.296667	0.973452	0.721788	0.0106667	6.35564	2300000	2350000
OY776060.1	47	0.514	0.446667	1.30973	0.971131	0.0673333	40.12	2350000	2400000
OY776060.1	48	0.492	0.488	1.05888	0.785132	0.004	2.38336	2400000	2450000
OY776060.1	49	0.126667	0.115238	1.31614	0.975879	0.0114286	6.80961	2455000	2500000
OY776060.1	50	0.392593	0.44963	0.86101	0.638415	-0.057037	-33.985	2500000	2550000
OY776060.1	51	0.365833	0.403333	0.780853	0.578981	-0.0375	-22.344	2550000	2590000
OY776060.1	52	0.0155556	0.02	0.555556	0.411929	-0.00444444	-2.64818	2615000	2650000
OY776060.1	53	0.388	0.418667	1.02244	0.758109	-0.0306667	-18.2725	2650000	2700000
OY776060.1	54	0.3475	0.2975	1.46467	1.08601	0.05	29.7921	2700000	2750000
OY776060.1	55	0.657333	0.545333	1.53128	1.1354	0.112	66.7342	2750000	2800000
OY776060.1	56	0.570667	0.488	1.17708	0.872772	0.0826667	49.2562	2800000	2850000
OY776060.1	57	0.492667	0.492	1.01057	0.749309	0.000666667	0.397227	2850000	2900000
OY776060.1	58	0.392	0.451333	0.950523	0.704786	-0.0593333	-35.3532	2900000	2950000
OY776060.1	59	0.189333	0.167333	1.12561	0.834606	0.022	13.1085	2950000	3000000
OY776060.1	60	0.377333	0.351333	1.80233	1.33638	0.026	15.4919	3000000	3050000
OY776060.1	61	0.302	0.34	1.53889	1.14104	-0.038	-22.642	3050000	3100000
OY776060.1	62	0.481333	0.446	1.07907	0.800097	0.0353333	21.0531	3100000	3150000
OY776060.1	63	0.18	0.286	0.925647	0.686341	-0.106	-63.1592	3150000	3200000
OY776060.1	64	0.378	0.452667	1.0409	0.771798	-0.0746667	-44.4895	3200000	3250000
OY776060.1	65	0.466667	0.482	0.961893	0.713217	-0.0153333	-9.13623	3250000	3300000
OY776060.1	66	0.420667	0.448	2.0104	1.49065	-0.0273333	-16.2863	3300000	3350000
OY776060.1	67	0.322667	0.614	0.560853	0.415857	-0.291333	-173.588	3350000	3400000
OY776060.1	68	0.546667	0.464	1.17455	0.870895	0.0826667	49.2562	3400000	3450000
OY776060.1	69	0.323333	0.194667	1.72275	1.27737	0.128667	76.6649	3450000	3500000
OY776060.1	70	0.368667	0.290667	1.19455	0.885724	0.078	46.4756	3500000	3550000
OY776060.1	71	0.419333	0.334	1.20516	0.893593	0.0853333	50.8451	3550000	3600000
OY776060.1	72	0.218667	0.282	0.822125	0.609583	-0.0633333	-37.7366	3600000	3650000
OY776060.1	73	0.351333	0.296667	1.41316	1.04782	0.0546667	32.5726	3650000	3700000
OY776060.1	74	0.477333	0.492667	1.01629	0.753552	-0.0153333	-9.13623	3700000	3750000
OY776060.1	75	0.622667	0.530667	1.15184	0.854059	0.092	54.8174	3750000	3800000
OY776060.1	76	0.7	0.437333	2.79858	2.07507	0.262667	156.508	3800000	3850000
OY776060.1	77	0.224667	0.22	1.70651	1.26533	0.00466667	2.78059	3850000	3900000
OY776060.1	78	0.577778	0.473333	1.43823	1.06641	0.104444	62.2323	3905000	3950000
OY776060.1	79	0.456	0.387333	1.1226	0.832379	0.0686667	40.9144	3950000	4000000
OY776060.1	80	0.662667	0.386667	1.71619	1.27251	0.276	164.452	4000000	4050000
OY776060.1	81	0.710667	0.376	2.05888	1.5266	0.334667	199.408	4050000	4100000
OY776060.1	82	0.308889	0.202222	1.86711	1.38441	0.106667	63.5564	4100000	4130000
OY776060.1	83	0.370667	0.282	1.30939	0.970874	0.0886667	52.8312	4150000	4200000
OY776060.1	84	0.652667	0.56	1.33753	0.991742	0.0926667	55.2146	4200000	4250000
OY776060.1	85	0.382667	0.364	1.31281	0.973411	0.0186667	11.1224	4250000	4300000
OY776060.1	86	0.507333	0.228	3.0433	2.25652	0.279333	166.438	4300000	4350000
OY776060.1	87	0.781333	0.646	1.19023	0.882525	0.135333	80.6372	4350000	4400000
OY776060.1	88	0.391333	0.293333	1.34714	0.99887	0.098	58.3924	4400000	4450000
OY776060.1	89	0.200667	0.174	2.61643	1.94001	0.0266667	15.8891	4450000	4500000
OY776060.1	90	0.18	0.189333	1.04831	0.77729	-0.00933333	-5.56118	4500000	4550000
OY776060.1	91	0.631333	0.682667	1.04996	0.778519	-0.0513333	-30.5865	4550000	4600000
OY776060.1	92	0.613333	0.51	1.67591	1.24264	0.103333	61.5702	4600000	4650000
OY776060.1	93	0.334	0.287333	1.16906	0.866828	0.0466667	27.8059	4650000	4700000
OY776060.1	94	0.0366667	0.02	0.916667	0.679683	0.0166667	9.93068	4700000	4715000
OY776060.1	95	0.130667	0.141333	0.911286	0.675693	-0.0106667	-6.35564	4770000	4800000
OY776060.1	96	0.364	0.353333	1.28732	0.954508	0.0106667	6.35564	4800000	4850000
OY776060.1	97	0.318	0.246	1.32343	0.981284	0.072	42.9006	4850000	4900000
OY776060.1	98	0.350667	0.239333	1.46307	1.08482	0.111333	66.337	4900000	4950000
OY776060.1	99	0.277333	0.242667	1.24612	0.92396	0.0346667	20.6558	4950000	5000000
OY776060.1	100	0.446	0.516667	1.67967	1.24543	-0.0706667	-42.1061	5000000	5050000
OY776060.1	101	0.14	0.214074	0.909466	0.674344	-0.0740741	-44.1364	5050000	5100000
OY776060.1	102	0.292667	0.224667	1.29267	0.958478	0.068	40.5172	5100000	5150000
OY776060.1	103	0.612	0.443333	1.50592	1.1166	0.168667	100.499	5150000	5200000
OY776060.1	104	0.330667	0.249333	1.16004	0.860135	0.0813333	48.4617	5200000	5250000
OY776060.1	105	0.554667	0.46	1.2575	0.932398	0.0946667	56.4063	5250000	5300000
OY776060.1	106	0.44	0.436	1.02577	0.760579	0.004	2.38336	5300000	5350000
OY776060.1	107	0.488	0.482667	1.40769	1.04377	0.00533333	3.17782	5350000	5400000
OY776060.1	108	0.364667	0.433333	0.864763	0.641198	-0.0686667	-40.9144	5400000	5450000
OY776060.1	109	0.649333	0.433333	1.64556	1.22014	0.216	128.702	5450000	5500000
OY776060.1	110	0.395333	0.318	1.2864	0.953832	0.0773333	46.0784	5500000	5550000
OY776060.1	111	0.380667	0.431333	0.848205	0.62892	-0.0506667	-30.1893	5550000	5600000
OY776060.1	112	0.384	0.164	3.11618	2.31056	0.22	131.085	5600000	5650000
OY776060.1	113	0.232	0.181333	1.47002	1.08998	0.0506667	30.1893	5650000	5700000
OY776060.1	114	0.245333	0.302667	0.903582	0.669981	-0.0573333	-34.1616	5700000	5750000
OY776060.1	115	0.261333	0.393333	0.680052	0.50424	-0.132	-78.651	5750000	5800000
OY776060.1	116	0.286	0.322	0.879486	0.652114	-0.036	-21.4503	5800000	5850000
OY776060.1	117	0.318	0.354	1.49156	1.10595	-0.036	-21.4503	5850000	5900000
OY776060.1	118	0.152	0.389333	0.45192	0.335086	-0.237333	-141.413	5900000	5950000
OY776060.1	119	0.212	0.232667	0.965239	0.715698	-0.0206667	-12.314	5950000	6000000
OY776060.1	120	0.237333	0.171333	2.2774	1.68863	0.066	39.3255	6000000	6050000
OY776060.1	121	0.409333	0.277333	1.61273	1.19579	0.132	78.651	6050000	6100000
OY776060.1	122	0.340667	0.217333	1.71595	1.27233	0.123333	73.4871	6100000	6150000
OY776060.1	123	0.280667	0.162	1.99524	1.47941	0.118667	70.7065	6150000	6200000
OY776060.1	124	0.247333	0.298667	1.01887	0.755461	-0.0513333	-30.5865	6200000	6250000
OY776060.1	125	0.348667	0.356	0.982332	0.728372	-0.00733333	-4.3695	6250000	6300000
OY776060.1	126	0.280667	0.35	0.768341	0.569703	-0.0693333	-41.3116	6300000	6350000
OY776060.1	127	0.432593	0.373333	1.18783	0.880745	0.0592593	35.3091	6350000	6400000
OY776060.1	128	0.391429	0.335238	1.34466	0.997029	0.0561905	33.4806	6405000	6450000
OY776060.1	129	0.218667	0.210667	1.09277	0.810256	0.008	4.76673	6450000	6500000
OY776060.1	130	0.450667	0.445333	1.70329	1.26295	0.00533333	3.17782	6500000	6550000
OY776060.1	131	0.504667	0.616667	0.971326	0.720211	-0.112	-66.7342	6550000	6600000
OY776060.1	132	0.460667	0.486	1.1293	0.837347	-0.0253333	-15.0946	6600000	6650000
OY776060.1	133	0.0542857	0.0590476	1.61426	1.19693	-0.0047619	-2.83734	6650000	6700000
OY776060.1	134	0.484	0.332667	2.04728	1.518	0.151333	90.1706	6700000	6750000
OY776060.1	135	0.175333	0.216	0.900673	0.667824	-0.0406667	-24.2309	6750000	6800000
OY776060.1	136	0.379333	0.362667	1.23663	0.916928	0.0166667	9.93068	6800000	6850000
OY776060.1	137	0.497333	0.46	1.07145	0.794449	0.0373333	22.2447	6850000	6900000
OY776060.1	138	0.341333	0.294667	1.50757	1.11782	0.0466667	27.8059	6900000	6950000
OY776060.1	139	0.616	0.512	1.27462	0.945095	0.104	61.9675	6950000	7000000
OY776060.1	140	0.285333	0.316	1.27971	0.948872	-0.0306667	-18.2725	7000000	7050000
OY776060.1	141	0.23	0.239333	1.78618	1.3244	-0.00933333	-5.56118	7050000	7100000
OY776060.1	142	0.312593	0.264444	1.87898	1.39321	0.0481481	28.6886	7100000	7150000
OY776060.1	143	0.402	0.512667	0.846374	0.627563	-0.110667	-65.9397	7150000	7200000
OY776060.1	144	0.523333	0.583333	1.11679	0.828071	-0.06	-35.7505	7200000	7250000
OY776060.1	145	0.326	0.435333	0.812207	0.602229	-0.109333	-65.1453	7250000	7300000
OY776060.1	146	0.602667	0.568667	1.01539	0.752883	0.034	20.2586	7300000	7350000
OY776060.1	147	0.287407	0.313333	0.893509	0.662512	-0.0259259	-15.4477	7350000	7400000
OY776060.1	148	0.195333	0.204667	1.19056	0.882768	-0.00933333	-5.56118	7400000	7450000
OY776060.1	149	0.336667	0.394667	1.02582	0.76062	-0.058	-34.5588	7450000	7500000
OY776060.1	150	0.160667	0.178667	0.825231	0.611886	-0.018	-10.7251	7500000	7550000
OY776060.1	151	0.276	0.214667	1.75326	1.29999	0.0613333	36.5449	7550000	7600000
OY776060.1	152	0.490667	0.376	1.34975	1.0008	0.114667	68.3231	7600000	7650000
OY776060.1	153	0.261481	0.317778	0.689448	0.511207	-0.0562963	-33.5436	7650000	7700000
OY776060.1	154	0.676667	0.476	1.45322	1.07753	0.200667	119.565	7700000	7750000
OY776060.1	155	0.349333	0.425333	0.808255	0.599298	-0.076	-45.2839	7750000	7800000
OY776060.1	156	0.356667	0.439333	0.742513	0.550552	-0.0826667	-49.2562	7800000	7850000
OY776060.1	157	0.332	0.253333	2.05974	1.52724	0.0786667	46.8728	7850000	7900000
OY776060.1	158	0.414	0.270667	1.84175	1.36561	0.143333	85.4039	7900000	7950000
OY776060.1	159	0.585333	0.596	0.958011	0.710338	-0.0106667	-6.35564	7950000	8000000
OY776060.1	160	0.69	0.63	1.10382	0.81845	0.06	35.7505	8000000	8050000
OY776060.1	161	0.394667	0.356	1.29938	0.963456	0.0386667	23.0392	8050000	8100000
OY776060.1	162	0.374667	0.357333	1.31494	0.97499	0.0173333	10.3279	8100000	8150000
OY776060.1	163	0.408	0.404667	1.17776	0.873274	0.00333333	1.98614	8150000	8200000
OY776060.1	164	0.314	0.4	0.870053	0.64512	-0.086	-51.2423	8200000	8250000
OY776060.1	165	0.426	0.469333	0.901163	0.668187	-0.0433333	-25.8198	8250000	8300000
OY776060.1	166	0.463333	0.482667	0.948719	0.703449	-0.0193333	-11.5196	8300000	8350000
OY776060.1	167	0.237333	0.274	0.874476	0.648399	-0.0366667	-21.8475	8350000	8400000
OY776060.1	168	0.428	0.446	1.01652	0.753723	-0.018	-10.7251	8400000	8450000
OY776060.1	169	0.409333	0.534	0.756151	0.560665	-0.124667	-74.2815	8450000	8500000
OY776060.1	170	0.312667	0.394667	0.798074	0.59175	-0.082	-48.859	8500000	8550000
OY776060.1	171	0.4	0.493333	0.62641	0.464466	-0.0933333	-55.6118	8550000	8600000
OY776060.1	172	0.399333	0.408667	1.0434	0.773651	-0.00933333	-5.56118	8600000	8650000
OY776060.1	173	0.401333	0.486667	0.765741	0.567775	-0.0853333	-50.8451	8650000	8700000
OY776060.1	174	0.486667	0.576667	0.809855	0.600485	-0.09	-53.6257	8700000	8750000
OY776060.1	175	0.354	0.462667	0.795933	0.590162	-0.108667	-64.7481	8750000	8800000
OY776060.1	176	0.2	0.156296	1.16431	0.863304	0.0437037	26.0405	8800000	8850000
OY776060.1	177	0.291852	0.237037	1.27914	0.948444	0.0548148	32.6609	8850000	8900000
OY776060.1	178	0.946667	0.746667	1.35919	1.0078	0.2	119.168	8900000	8950000
OY776060.1	179	0.901333	0.668	1.47511	1.09375	0.233333	139.03	8950000	9000000
OY776060.1	180	0.340667	0.35	1.0486	0.777507	-0.00933333	-5.56118	9000000	9050000
OY776060.1	181	0.154815	0.158519	1.44009	1.06779	-0.0037037	-2.20682	9050000	9100000
OY776060.1	182	0.398667	0.304	1.76853	1.31132	0.0946667	56.4063	9100000	9150000
OY776060.1	183	0.172593	0.216296	1.34718	0.998894	-0.0437037	-26.0405	9150000	9200000
OY776060.1	184	0.473333	0.357333	1.43768	1.066	0.116	69.1176	9200000	9250000
OY776060.1	185	0.306	0.235333	1.14717	0.850597	0.0706667	42.1061	9250000	9300000
OY776060.1	186	0.161481	0.112593	2.09036	1.54994	0.0488889	29.13	9300000	9350000
OY776060.1	187	0.468667	0.208667	3.50804	2.60112	0.26	154.919	9350000	9400000
OY776060.1	188	0.626667	0.526667	1.22706	0.909833	0.1	59.5841	9400000	9450000
OY776060.1	189	0.588	0.504667	1.39566	1.03484	0.0833333	49.6534	9450000	9500000
OY776060.1	190	0.638667	0.610667	1.82859	1.35585	0.028	16.6836	9500000	9550000
OY776060.1	191	0.789333	0.556667	1.51969	1.1268	0.232667	138.632	9550000	9600000
OY776060.1	192	0.345333	0.27	1.34807	0.999554	0.0753333	44.8867	9600000	9650000
OY776060.1	193	0.578	0.464	1.33089	0.986815	0.114	67.9259	9650000	9700000
OY776060.1	194	0.366	0.248	2.34867	1.74148	0.118	70.3092	9700000	9750000
OY776060.1	195	0.300667	0.278	1.22932	0.911505	0.0226667	13.5057	9750000	9800000
OY776060.1	196	0.454667	0.417333	1.06602	0.790422	0.0373333	22.2447	9800000	9850000
OY776060.1	197	0.71	0.728667	1.00086	0.742108	-0.0186667	-11.1224	9850000	9900000
OY776060.1	198	0.123333	0.150667	0.599787	0.444725	-0.0273333	-16.2863	9900000	9950000
OY776060.1	199	0.102	0.144	0.573767	0.425433	-0.042	-25.0253	9950000	10000000
OY776060.1	200	0.712667	0.705333	0.954824	0.707975	0.00733333	4.3695	10000000	10050000
OY776060.1	201	0.787333	0.534	2.07156	1.536	0.253333	150.946	10050000	10100000
OY776060.1	202	0.372667	0.275333	1.63252	1.21047	0.0973333	57.9952	10100000	10150000
OY776060.1	203	0.493333	0.312593	1.91392	1.41912	0.180741	107.693	10150000	10200000
OY776060.1	204	0.738667	0.448667	1.72428	1.27851	0.29	172.794	10200000	10250000
OY776060.1	205	0.237333	0.254667	0.931539	0.69071	-0.0173333	-10.3279	10250000	10300000
OY776060.1	206	0.425926	0.694074	0.644713	0.478037	-0.268148	-159.774	10305000	10350000
OY776060.1	207	0.502	0.380667	1.37592	1.02021	0.121333	72.2954	10350000	10400000
OY776060.1	208	0.434	0.326	1.48347	1.09995	0.108	64.3508	10400000	10450000
OY776060.1	209	0.934667	0.735333	1.20784	0.895579	0.199333	118.771	10450000	10500000
OY776060.1	210	0.519333	0.569333	0.842909	0.624994	-0.05	-29.7921	10500000	10550000
OY776060.1	211	0.144444	0.237037	0.325375	0.241257	-0.0925926	-55.1705	10550000	10600000
OY776060.1	212	0.337333	0.442667	0.717801	0.532229	-0.105333	-62.7619	10600000	10650000
OY776060.1	213	0.430667	0.536667	0.918667	0.681166	-0.106	-63.1592	10650000	10700000
OY776060.1	214	0.460667	0.396	1.24062	0.919888	0.0646667	38.5311	10700000	10750000
OY776060.1	215	0.276	0.524667	0.518981	0.38481	-0.248667	-148.166	10750000	10800000
OY776060.1	216	0.305185	0.331111	0.95702	0.709603	-0.0259259	-15.4477	10800000	10850000
OY776060.1	217	0.294667	0.212667	2.35642	1.74722	0.082	48.859	10850000	10900000
OY776060.1	218	0.224667	0.161333	1.82407	1.35249	0.0633333	37.7366	10900000	10950000
OY776060.1	219	0.262667	0.372667	0.776677	0.575884	-0.11	-65.5425	10950000	11000000
OY776060.1	220	0.368	0.519333	0.74043	0.549008	-0.151333	-90.1706	11000000	11050000
OY776060.1	221	0.283333	0.333333	0.97371	0.721979	-0.05	-29.7921	11050000	11100000
OY776060.1	222	0.279333	0.245333	1.58391	1.17443	0.034	20.2586	11100000	11150000
OY776060.1	223	0.366667	0.306667	1.2627	0.936254	0.06	35.7505	11150000	11200000
OY776060.1	224	0.474	0.503333	0.962133	0.713395	-0.0293333	-17.478	11200000	11250000
OY776060.1	225	0.663333	0.606667	1.11529	0.826959	0.0566667	33.7643	11250000	11300000
OY776060.1	226	0.313333	0.344	0.997853	0.73988	-0.0306667	-18.2725	11300000	11350000
OY776060.1	227	0.346667	0.373333	0.848129	0.628864	-0.0266667	-15.8891	11350000	11395000
OY776060.1	228	0.321333	0.232667	1.74875	1.29665	0.0886667	52.8312	11400000	11450000
OY776060.1	229	0.215333	0.411333	0.538501	0.399284	-0.196	-116.785	11450000	11500000
OY776060.1	230	0.320741	0.322222	1.13011	0.837948	-0.00148148	-0.882728	11500000	11550000
OY776060.1	231	0.51037	0.699259	0.821418	0.609059	-0.188889	-112.548	11550000	11600000
OY776060.1	232	0.620667	0.736	0.875311	0.649019	-0.115333	-68.7203	11600000	11650000
OY776060.1	233	0.208667	0.270667	0.465484	0.345143	-0.062	-36.9421	11650000	11700000
OY776060.1	234	0.422963	0.418519	1.21567	0.901384	0.00444444	2.64818	11705000	11750000
OY776060.1	235	0.260741	0.182963	1.51845	1.12589	0.0777778	46.3432	11750000	11800000
OY776060.1	236	0.321333	0.446	1.968	1.45921	-0.124667	-74.2815	11800000	11850000
OY776060.1	237	0.396	0.556667	1.18717	0.880256	-0.160667	-95.7318	11850000	11900000
OY776060.1	238	0.250667	0.232667	0.989495	0.733683	0.018	10.7251	11900000	11950000
OY776060.1	239	0.552667	0.544667	1.04474	0.774648	0.008	4.76673	11950000	12000000
OY776060.1	240	0.478519	0.59037	0.868183	0.643734	-0.111852	-66.6459	12000000	12050000
OY776060.1	241	0.600667	0.516667	1.23078	0.91259	0.084	50.0507	12050000	12100000
OY776060.1	242	0.296	0.445333	0.712528	0.52832	-0.149333	-88.9789	12100000	12150000
OY776060.1	243	0.366	0.436667	0.732301	0.542981	-0.0706667	-42.1061	12150000	12200000
OY776060.1	244	0.688	0.702667	0.870438	0.645405	-0.0146667	-8.739	12200000	12250000
OY776060.1	245	0.521333	0.553333	0.932957	0.691761	-0.032	-19.0669	12250000	12300000
OY776060.1	246	0.274667	0.317333	1.12562	0.834613	-0.0426667	-25.4226	12300000	12350000
OY776060.1	247	0.360667	0.366667	1.02036	0.756568	-0.006	-3.57505	12350000	12400000
OY776060.1	248	0.209333	0.232667	0.728288	0.540005	-0.0233333	-13.903	12400000	12450000
OY776060.1	249	0.514	0.614667	0.940449	0.697316	-0.100667	-59.9813	12450000	12500000
OY776060.1	250	0.372667	0.498	0.866208	0.642269	-0.125333	-74.6787	12500000	12550000
OY776060.1	251	0.355333	0.446	0.876423	0.649843	-0.0906667	-54.0229	12550000	12600000
OY776060.1	252	0.343333	0.492667	0.777782	0.576704	-0.149333	-88.9789	12600000	12650000
OY776060.1	253	0.221333	0.235333	0.894489	0.663238	-0.014	-8.34178	12650000	12700000
OY776060.1	254	0.239333	0.232	1.13661	0.842761	0.00733333	4.3695	12700000	12750000
OY776060.1	255	0.12	0.181481	0.640905	0.475213	-0.0614815	-36.6332	12750000	12800000
OY776060.1	256	0.259333	0.403333	0.627187	0.465042	-0.144	-85.8011	12800000	12850000
OY776060.1	257	0.338	0.448	0.779842	0.578231	-0.11	-65.5425	12850000	12900000
OY776060.1	258	0.254667	0.555333	0.452073	0.3352	-0.300667	-179.15	12900000	12950000
OY776060.1	259	0.514	0.672	0.669887	0.496703	-0.158	-94.1429	12950000	13000000
OY776060.1	260	0.141333	0.124	1.00085	0.742105	0.0173333	10.3279	13000000	13050000
OY776060.1	261	0.136667	0.234	0.907378	0.672795	-0.0973333	-57.9952	13050000	13100000
OY776060.1	262	0.138	0.124	1.1748	0.871082	0.014	8.34178	13100000	13150000
OY776060.1	263	0.236	0.202	2.3325	1.72948	0.034	20.2586	13150000	13200000
OY776060.1	264	0.284167	0.299167	0.892179	0.661526	-0.015	-8.93762	13200000	13250000
OY776060.1	265	0.225333	0.252667	0.856862	0.635339	-0.0273333	-16.2863	13250000	13300000
OY776060.1	266	0.401333	0.422667	1.11154	0.824175	-0.0213333	-12.7113	13300000	13350000
OY776060.1	267	0.321333	0.534667	0.599705	0.444664	-0.213333	-127.113	13350000	13400000
OY776060.1	268	0.316	0.412667	0.885619	0.656662	-0.0966667	-57.598	13400000	13450000
OY776060.1	269	0.526667	0.528	1.08093	0.801478	-0.00133333	-0.794455	13450000	13500000
OY776060.1	270	0.419333	0.472667	0.910812	0.675342	-0.0533333	-31.7782	13500000	13550000
OY776060.1	271	0.480667	0.492667	1.08896	0.807434	-0.012	-7.15009	13550000	13600000
OY776060.1	272	0.118	0.182	0.698458	0.517887	-0.064	-38.1338	13600000	13650000
OY776060.1	273	0.336	0.36	0.882683	0.654485	-0.024	-14.3002	13650000	13700000
OY776060.1	274	0.428	0.645333	0.671612	0.497982	-0.217333	-129.496	13700000	13750000
OY776060.1	275	0.526667	0.503333	1.03733	0.769151	0.0233333	13.903	13750000	13800000
OY776060.1	276	0.31	0.526	0.598399	0.443696	-0.216	-128.702	13800000	13850000
OY776060.1	277	0.714	0.774667	0.869185	0.644476	-0.0606667	-36.1477	13850000	13900000
OY776060.1	278	0.460667	0.452	1.08581	0.805099	0.00866667	5.16396	13900000	13950000
OY776060.1	279	0.448	0.428	1.13289	0.840005	0.02	11.9168	13950000	14000000
OY776060.1	280	0.182667	0.198	0.85405	0.633254	-0.0153333	-9.13623	14000000	14050000
OY776060.1	281	0.326	0.322667	1.03105	0.764498	0.00333333	1.98614	14050000	14100000
OY776060.1	282	0.102667	0.127333	0.972066	0.72076	-0.0246667	-14.6974	14100000	14150000
OY776060.1	283	0.267333	0.204	1.37295	1.01801	0.0633333	37.7366	14150000	14200000
OY776060.1	284	0.152667	0.1	1.27363	0.944364	0.0526667	31.381	14200000	14250000
OY776060.1	285	0.314667	0.23	1.41264	1.04743	0.0846667	50.4479	14250000	14300000
OY776060.1	286	0.158	0.135333	1.62042	1.20149	0.0226667	13.5057	14300000	14350000
OY776060.1	287	0.533333	0.240667	3.55098	2.63296	0.292667	174.383	14350000	14400000
OY776060.1	288	0.459333	0.247333	2.47929	1.83833	0.212	126.318	14400000	14450000
OY776060.1	289	0.356	0.310667	1.2403	0.919649	0.0453333	27.0115	14450000	14500000
OY776060.1	290	0.210667	0.194667	1.22299	0.906812	0.016	9.53346	14500000	14550000
OY776060.1	291	0.466	0.654	0.631617	0.468326	-0.188	-112.018	14550000	14600000
OY776060.1	292	0.504	0.625333	0.743739	0.551462	-0.121333	-72.2954	14600000	14650000
OY776060.1	293	0.280667	0.302	0.912863	0.676863	-0.0213333	-12.7113	14650000	14700000
OY776060.1	294	0.648	0.654	1.07789	0.799225	-0.006	-3.57505	14700000	14750000
OY776060.1	295	0.690667	0.573333	1.41324	1.04788	0.117333	69.912	14750000	14800000
OY776060.1	296	0.481333	0.385333	1.29242	0.958291	0.096	57.2007	14800000	14850000
OY776060.1	297	0.469333	0.490667	1.11644	0.82781	-0.0213333	-12.7113	14850000	14900000
OY776060.1	298	0.464	0.448667	1.11889	0.829629	0.0153333	9.13623	14900000	14950000
OY776060.1	299	0.324	0.383333	0.753423	0.558642	-0.0593333	-35.3532	14950000	15000000
OY776060.1	300	0.505333	0.6	0.904912	0.670967	-0.0946667	-56.4063	15000000	15050000
OY776060.1	301	0.346667	0.366	1.15741	0.858187	-0.0193333	-11.5196	15050000	15100000
OY776060.1	302	0.358	0.656667	0.595167	0.4413	-0.298667	-177.958	15100000	15150000
OY776060.1	303	0.268	0.348667	0.802788	0.595245	-0.0806667	-48.0645	15150000	15200000
OY776060.1	304	0.196667	0.185333	1.536	1.1389	0.0113333	6.75287	15200000	15250000
OY776060.1	305	0.351852	0.359259	0.982054	0.728166	-0.00740741	-4.41364	15255000	15300000
OY776060.1	306	0.206	0.278667	0.801958	0.594629	-0.0726667	-43.2978	15300000	15350000
OY776060.1	307	0.484444	0.361481	1.36763	1.01406	0.122963	73.2664	15350000	15400000
OY776060.1	308	0.384667	0.330667	2.40348	1.78211	0.054	32.1754	15400000	15450000
OY776060.1	309	0.462667	0.382	1.2356	0.916162	0.0806667	48.0645	15450000	15500000
OY776060.1	310	0.247333	0.229333	1.16561	0.86427	0.018	10.7251	15500000	15550000
OY776060.1	311	0.21	0.184667	1.48863	1.10378	0.0253333	15.0946	15550000	15600000
OY776060.1	312	0.282	0.224	1.40636	1.04278	0.058	34.5588	15600000	15650000
OY776060.1	313	0.177037	0.179259	1.03575	0.767978	-0.00222222	-1.32409	15650000	15700000
OY776060.1	314	0.241333	0.228667	1.25877	0.933344	0.0126667	7.54732	15700000	15750000
OY776060.1	315	0.254815	0.212593	1.25214	0.92843	0.0422222	25.1577	15750000	15800000
OY776060.1	316	0.0973333	0.11	0.934913	0.693212	-0.0126667	-7.54732	15800000	15850000
OY776060.1	317	0.276667	0.256	1.13795	0.843759	0.0206667	12.314	15850000	15900000
OY776060.1	318	0.140667	0.103333	1.52395	1.12997	0.0373333	22.2447	15900000	15950000
OY776060.1	319	0.17	0.144667	1.11479	0.826582	0.0253333	15.0946	15950000	16000000
OY776060.1	320	0.165333	0.143333	1.20784	0.895577	0.022	13.1085	16000000	16050000
OY776060.1	321	0.219333	0.226	2.77167	2.05512	-0.00666667	-3.97227	16050000	16100000
OY776060.1	322	0.321333	0.338	1.04188	0.772524	-0.0166667	-9.93068	16100000	16150000
OY776060.1	323	0.718	0.691333	0.954983	0.708093	0.0266667	15.8891	16150000	16200000
OY776060.1	324	0.106	0.112667	1.66736	1.2363	-0.00666667	-3.97227	16200000	16250000
OY776060.1	325	0.104444	0.216667	0.647658	0.480221	-0.112222	-66.8666	16250000	16300000
OY776060.1	326	0.290667	0.364	0.891449	0.660985	-0.0733333	-43.695	16300000	16350000
OY776060.1	327	0.195333	0.188	0.852298	0.631955	0.00733333	4.3695	16350000	16400000
OY776060.1	328	0.37	0.311333	1.1472	0.850613	0.0586667	34.956	16400000	16450000
OY776060.1	329	0.548667	0.538667	1.06999	0.793367	0.01	5.95841	16450000	16500000
OY776060.1	330	0.500667	0.453333	1.23799	0.917936	0.0473333	28.2031	16500000	16550000
OY776060.1	331	0.546	0.417333	1.48975	1.10461	0.128667	76.6649	16550000	16600000
OY776060.1	332	0.737333	0.593333	1.29104	0.957273	0.144	85.8011	16600000	16650000
OY776060.1	333	0.174667	0.248667	1.84786	1.37014	-0.074	-44.0922	16650000	16700000
OY776060.1	334	0.144	0.108	2.63698	1.95525	0.036	21.4503	16700000	16750000
OY776060.1	335	0.164444	0.105926	3.92498	2.91026	0.0585185	34.8677	16755000	16800000
OY776060.1	336	0.167333	0.152	1.23738	0.917482	0.0153333	9.13623	16800000	16850000
OY776060.1	337	0.180667	0.134667	1.62189	1.20258	0.046	27.4087	16850000	16900000
OY776060.1	338	0.1075	0.164167	0.943275	0.699412	-0.0566667	-33.7643	16900000	16950000
OY776060.1	339	0.159333	0.148	1.17382	0.870357	0.0113333	6.75287	16950000	17000000
OY776060.1	340	0.0883333	0.0783333	1.23796	0.917909	0.01	5.95841	17000000	17050000
OY776060.1	341	0.160667	0.119333	2.46553	1.82812	0.0413333	24.6281	17050000	17100000
OY776060.1	342	0.142963	0.116296	1.54146	1.14295	0.0266667	15.8891	17100000	17150000
OY776060.1	343	0.166667	0.136	1.53389	1.13734	0.0306667	18.2725	17150000	17200000
OY776060.1	344	0.114	0.08	1.98139	1.46914	0.034	20.2586	17200000	17250000
OY776060.1	345	0.167333	0.162	1.18715	0.880235	0.00533333	3.17782	17250000	17300000
OY776060.1	346	0.202	0.178	1.34177	0.994884	0.024	14.3002	17300000	17350000
OY776060.1	347	0.176667	0.174667	0.942114	0.698551	0.002	1.19168	17350000	17400000
OY776060.1	348	0.667333	0.682	1.01567	0.753092	-0.0146667	-8.739	17400000	17450000
OY776060.1	349	0.514	0.771333	0.694887	0.515239	-0.257333	-153.33	17450000	17500000
OY776060.1	350	0.838667	0.758	1.08026	0.800984	0.0806667	48.0645	17500000	17550000
OY776060.1	351	1.11733	1.00267	1.13961	0.84499	0.114667	68.3231	17550000	17600000
OY776060.1	352	0.906	0.809333	1.17122	0.868428	0.0966667	57.598	17600000	17650000
OY776060.1	353	0.726	0.655333	1.14589	0.849643	0.0706667	42.1061	17650000	17700000
OY776060.1	354	0.191333	0.397333	0.483293	0.358348	-0.206	-122.743	17700000	17750000
OY776060.1	355	0.502667	0.589333	0.85633	0.634945	-0.0866667	-51.6396	17750000	17800000
OY776060.1	356	0.208667	0.296667	0.816918	0.605722	-0.088	-52.434	17800000	17850000
OY776060.1	357	0.562963	0.387407	1.66695	1.23599	0.175556	104.603	17850000	17900000
OY776060.1	358	0.62	0.59	1.24073	0.919968	0.03	17.8752	17900000	17950000
OY776060.1	359	0.354667	0.588	0.729282	0.540743	-0.233333	-139.03	17950000	18000000
OY776060.1	360	0.416	0.556667	0.788805	0.584877	-0.140667	-83.815	18000000	18050000
OY776060.1	361	0.172	0.260667	1.05191	0.779965	-0.0886667	-52.8312	18050000	18100000
OY776060.1	362	0.0666667	0.067619	1.13606	0.84236	-0.000952381	-0.567468	18100000	18135000
OY776061.1	0	0.294	0.284	0.992736	0.736086	0.01	5.95841	0	50000
OY776061.1	1	0.131852	0.159259	0.731492	0.542381	-0.0274074	-16.3305	50000	100000
OY776061.1	2	0.119333	0.146	0.698669	0.518044	-0.0266667	-15.8891	100000	150000
OY776061.1	3	0.344667	0.514667	0.648474	0.480825	-0.17	-101.293	150000	200000
OY776061.1	4	0.499333	0.627333	0.990522	0.734444	-0.128	-76.2677	200000	250000
OY776061.1	5	0.228	0.181333	1.95235	1.44761	0.0466667	27.8059	250000	300000
OY776061.1	6	0.520667	0.572	0.999632	0.741199	-0.0513333	-30.5865	300000	350000
OY776061.1	7	0.255333	0.179333	2.40132	1.78051	0.076	45.2839	350000	400000
OY776061.1	8	0.298667	0.273333	1.62754	1.20678	0.0253333	15.0946	400000	450000
OY776061.1	9	0.225333	0.288667	0.808711	0.599636	-0.0633333	-37.7366	450000	500000
OY776061.1	10	0.174667	0.224667	0.767685	0.569217	-0.05	-29.7921	500000	550000
OY776061.1	11	0.211333	0.294	0.906011	0.671782	-0.0826667	-49.2562	550000	600000
OY776061.1	12	0.303333	0.344	0.994828	0.737637	-0.0406667	-24.2309	600000	650000
OY776061.1	13	0.151333	0.164	3.10699	2.30374	-0.0126667	-7.54732	650000	700000
OY776061.1	14	0.116667	0.273333	0.603434	0.44743	-0.156667	-93.3484	700000	750000
OY776061.1	15	0.334667	0.312	1.16907	0.866829	0.0226667	13.5057	750000	800000
OY776061.1	16	0.406667	0.466667	0.924274	0.685324	-0.06	-35.7505	800000	850000
OY776061.1	17	0.52	0.522667	1.12705	0.835675	-0.00266667	-1.58891	850000	900000
OY776061.1	18	0.318667	0.238	1.84274	1.36634	0.0806667	48.0645	900000	950000
OY776061.1	19	0.361333	0.296	1.18448	0.878258	0.0653333	38.9283	950000	1000000
OY776061.1	20	0.345333	0.36	0.922246	0.683819	-0.0146667	-8.739	1000000	1050000
OY776061.1	21	0.534667	0.348667	1.6801	1.24575	0.186	110.826	1050000	1100000
OY776061.1	22	0.338	0.384667	0.969467	0.718833	-0.0466667	-27.8059	1100000	1150000
OY776061.1	23	0.425333	0.352	1.18135	0.875935	0.0733333	43.695	1150000	1200000
OY776061.1	24	0.292	0.223333	1.99483	1.47911	0.0686667	40.9144	1200000	1250000
OY776061.1	25	0.104667	0.208	0.595106	0.441254	-0.103333	-61.5702	1250000	1300000
OY776061.1	26	0.44	0.251333	2.20277	1.63329	0.188667	112.415	1300000	1350000
OY776061.1	27	0.214	0.161333	1.25948	0.933868	0.0526667	31.381	1350000	1400000
OY776061.1	28	0.224	0.31	0.84244	0.624646	-0.086	-51.2423	1400000	1450000
OY776061.1	29	0.19	0.310667	0.634205	0.470245	-0.120667	-71.8982	1450000	1500000
OY776061.1	30	0.376	0.42	1.00271	0.743485	-0.044	-26.217	1500000	1550000
OY776061.1	31	0.422	0.302	1.38728	1.02863	0.12	71.5009	1550000	1600000
OY776061.1	32	0.372667	0.471333	0.685292	0.508125	-0.0986667	-58.7897	1600000	1650000
OY776061.1	33	0.346667	0.314	1.28755	0.954682	0.0326667	19.4641	1650000	1700000
OY776061.1	34	0.338667	0.42	0.985244	0.730531	-0.0813333	-48.4617	1700000	1750000
OY776061.1	35	0.409333	0.324	1.34	0.993575	0.0853333	50.8451	1750000	1800000
OY776061.1	36	0.276	0.266667	1.09504	0.811942	0.00933333	5.56118	1800000	1850000
OY776061.1	37	0.322667	0.382	0.982884	0.728781	-0.0593333	-35.3532	1850000	1900000
OY776061.1	38	0.124	0.105333	0.869641	0.644815	0.0186667	11.1224	1900000	1950000
OY776061.1	39	0.178667	0.118667	2.18214	1.618	0.06	35.7505	1950000	2000000
OY776061.1	40	0.0716667	0.203333	0.471893	0.349895	-0.131667	-78.4524	2000000	2050000
OY776061.1	41	0.0546667	0.110667	0.810803	0.601188	-0.056	-33.3671	2050000	2100000
OY776061.1	42	0.202	0.156	1.31877	0.97783	0.046	27.4087	2100000	2150000
OY776061.1	43	0.272667	0.207333	1.63323	1.211	0.0653333	38.9283	2150000	2200000
OY776061.1	44	0.522	0.519333	1.09119	0.809087	0.00266667	1.58891	2200000	2250000
OY776061.1	45	0.296	0.201333	2.66999	1.97972	0.0946667	56.4063	2250000	2300000
OY776061.1	46	0.126667	0.0733333	1.36497	1.01208	0.0533333	31.7782	2300000	2350000
OY776061.1	47	0.375333	0.178	2.46288	1.82616	0.197333	117.579	2350000	2400000
OY776061.1	48	0.251667	0.324167	0.705395	0.52303	-0.0725	-43.1985	2400000	2450000
OY776061.1	49	0.155333	0.22	0.78229	0.580046	-0.0646667	-38.5311	2450000	2500000
OY776061.1	50	0.205333	0.202	1.03701	0.768912	0.00333333	1.98614	2500000	2550000
OY776061.1	51	0.119167	0.0866667	1.89041	1.40169	0.0325	19.3648	2550000	2595000
OY776061.1	52	0.135556	0.10963	1.84897	1.37096	0.0259259	15.4477	2605000	2650000
OY776061.1	53	0.228889	0.0877778	3.84247	2.84908	0.141111	84.0798	2655000	2700000
OY776061.1	54	0.1525	0.0966667	1.76314	1.30732	0.0558333	33.2678	2700000	2750000
OY776061.1	55	0.248	0.193333	1.16799	0.866029	0.0546667	32.5726	2750000	2800000
OY776061.1	56	0.173333	0.222667	0.830941	0.616119	-0.0493333	-29.3948	2800000	2850000
OY776061.1	57	0.103333	0.144	0.82666	0.612945	-0.0406667	-24.2309	2850000	2900000
OY776061.1	58	0.157333	0.197333	0.758607	0.562486	-0.04	-23.8336	2900000	2950000
OY776061.1	59	0.215333	0.243333	0.883844	0.655346	-0.028	-16.6836	2950000	3000000
OY776061.1	60	0.343333	0.351333	1.32125	0.979671	-0.008	-4.76673	3000000	3050000
OY776061.1	61	0.0851852	0.0955556	0.89769	0.665612	-0.0103704	-6.17909	3050000	3100000
OY776061.1	62	0.116	0.146667	0.97706	0.724463	-0.0306667	-18.2725	3100000	3150000
OY776061.1	63	0.152667	0.148667	0.894719	0.663409	0.004	2.38336	3150000	3200000
OY776061.1	64	0.146	0.126	1.91709	1.42147	0.02	11.9168	3200000	3250000
OY776061.1	65	0.0846667	0.11	1.72874	1.28181	-0.0253333	-15.0946	3250000	3300000
OY776061.1	66	0.144	0.150667	0.960193	0.711956	-0.00666667	-3.97227	3320000	3350000
OY776061.1	67	0.192667	0.165333	1.84213	1.36589	0.0273333	16.2863	3350000	3400000
OY776061.1	68	0.0873333	0.0773333	1.16701	0.865309	0.01	5.95841	3400000	3450000
OY776061.1	69	0.01	0.00666667	0.75	0.556104	0.00333333	1.98614	3450000	3500000
OY776061.1	71	0	0	0	0	0	0	3590000	3595000
OY776061.1	72	0.02	0.0133333	1.5	1.11221	0.00666667	3.97227	3600000	3605000
OY776061.1	73	0.00333333	0.00333333	0.5	0.370736	0	0	3660000	3690000
OY776061.1	74	0	0	0	0	0	0	3705000	3740000
OY776061.1	75	0	0	0	0	0	0	3755000	3760000
OY776061.1	76	0	0	0	0	0	0	3815000	3840000
OY776061.1	77	0	0	0	0	0	0	3860000	3865000
OY776061.1	78	0	0	0	0	0	0	3935000	3940000
OY776061.1	80	0.00888889	0.0111111	0.266667	0.197726	-0.00222222	-1.32409	4000000	4045000
OY776061.1	81	0.0333333	0.01	2.875	2.13173	0.0233333	13.903	4065000	4100000
OY776061.1	82	0.00333333	0.005	0.375	0.278052	-0.00166667	-0.993068	4100000	4140000
OY776061.1	83	0.0266667	0.02	1.625	1.20489	0.00666667	3.97227	4170000	4195000
OY776061.1	84	0	0	0	0	0	0	4225000	4230000
OY776061.1	86	0	0	0	0	0	0	4310000	4315000
OY776061.1	88	0	0.0133333	0	0	-0.0133333	-7.94455	4425000	4430000
OY776061.1	89	0.0355556	0.02	1.77778	1.31817	0.0155556	9.26864	4455000	4500000
OY776061.1	90	0.306667	0.286667	1.54322	1.14426	0.02	11.9168	4510000	4550000
OY776061.1	91	0.145185	0.105185	1.54857	1.14822	0.04	23.8336	4550000	4600000
OY776061.1	92	0.149167	0.1375	1.19468	0.885819	0.0116667	6.95148	4600000	4650000
OY776061.1	93	0.195333	0.145333	1.50319	1.11457	0.05	29.7921	4650000	4700000
OY776061.1	94	0.164	0.116667	2.56073	1.89871	0.0473333	28.2031	4700000	4750000
OY776061.1	95	0.198	0.156	1.75623	1.30219	0.042	25.0253	4750000	4800000
OY776061.1	96	0.260667	0.22	1.33192	0.987582	0.0406667	24.2309	4800000	4850000
OY776061.1	97	0.274	0.256667	1.36738	1.01387	0.0173333	10.3279	4850000	4900000
OY776061.1	98	0.144667	0.127333	1.27919	0.948483	0.0173333	10.3279	4900000	4950000
OY776061.1	99	0.170667	0.18	1.15691	0.857816	-0.00933333	-5.56118	4950000	5000000
OY776061.1	100	0.194667	0.173333	1.15378	0.855499	0.0213333	12.7113	5000000	5050000
OY776061.1	101	0.143333	0.120667	1.62329	1.20363	0.0226667	13.5057	5050000	5100000
OY776061.1	102	0.2	0.137333	1.56387	1.15957	0.0626667	37.3394	5100000	5150000
OY776061.1	103	0.157333	0.0906667	2.12494	1.57558	0.0666667	39.7227	5150000	5200000
OY776061.1	104	0.313333	0.150667	6.30146	4.67236	0.162667	96.9235	5200000	5250000
OY776061.1	105	0.174	0.234	0.874617	0.648504	-0.06	-35.7505	5250000	5300000
OY776061.1	106	0.151333	0.119333	1.97909	1.46744	0.032	19.0669	5300000	5350000
OY776061.1	107	0.111333	0.0706667	1.69419	1.2562	0.0406667	24.2309	5350000	5400000
OY776061.1	108	0.273333	0.230667	1.44347	1.07029	0.0426667	25.4226	5400000	5450000
OY776061.1	109	0.335333	0.192667	1.55822	1.15538	0.142667	85.0067	5450000	5500000
OY776061.1	110	0.178667	0.209333	0.904104	0.670368	-0.0306667	-18.2725	5500000	5550000
OY776061.1	111	0.146667	0.346667	0.782031	0.579854	-0.2	-119.168	5550000	5600000
OY776061.1	112	0.16	0.0986667	2.98722	2.21494	0.0613333	36.5449	5600000	5650000
OY776061.1	113	0.154	0.142	1.28845	0.955351	0.012	7.15009	5650000	5700000
OY776061.1	114	0.15	0.098	1.51071	1.12015	0.052	30.9837	5700000	5750000
OY776061.1	115	0.176	0.132667	1.34992	1.00093	0.0433333	25.8198	5750000	5800000
OY776061.1	116	0.320741	0.160741	4.37417	3.24333	0.16	95.3346	5800000	5850000
OY776061.1	117	0.213333	0.262667	1.99956	1.48262	-0.0493333	-29.3948	5850000	5900000
OY776061.1	118	0.194667	0.29	0.723256	0.536274	-0.0953333	-56.8035	5900000	5950000
OY776061.1	119	0.307333	0.246	1.19356	0.88499	0.0613333	36.5449	5950000	6000000
OY776061.1	120	0.194667	0.219333	0.860137	0.637768	-0.0246667	-14.6974	6000000	6050000
OY776061.1	121	0.157333	0.132667	1.35498	1.00468	0.0246667	14.6974	6050000	6100000
OY776061.1	122	0.245333	0.457333	1.10286	0.817742	-0.212	-126.318	6100000	6150000
OY776061.1	123	0.328667	0.41	1.04042	0.771442	-0.0813333	-48.4617	6150000	6200000
OY776061.1	124	0.217333	0.379333	0.751132	0.556944	-0.162	-96.5263	6200000	6250000
OY776061.1	125	0.183333	0.188	0.699636	0.518761	-0.00466667	-2.78059	6250000	6300000
OY776061.1	126	0.284667	0.234	9.58351	7.10591	0.0506667	30.1893	6300000	6350000
OY776061.1	127	0.214667	0.236	1.1687	0.866557	-0.0213333	-12.7113	6350000	6400000
OY776061.1	128	0.227778	0.17	1.15524	0.856579	0.0577778	34.4264	6400000	6450000
OY776061.1	129	0.176667	0.189333	0.929794	0.689416	-0.0126667	-7.54732	6450000	6500000
OY776061.1	130	0.151333	0.190667	0.954956	0.708073	-0.0393333	-23.4364	6500000	6550000
OY776061.1	131	0.391333	0.401333	1.03182	0.765069	-0.01	-5.95841	6550000	6600000
OY776061.1	132	0.294667	0.226	1.263	0.936478	0.0686667	40.9144	6600000	6650000
OY776061.1	133	0.370667	0.176	2.81489	2.08716	0.194667	115.99	6650000	6700000
OY776061.1	134	0.280667	0.252667	1.25071	0.927363	0.028	16.6836	6700000	6750000
OY776061.1	135	0.192667	0.146667	1.34649	0.998384	0.046	27.4087	6750000	6800000
OY776061.1	136	0.23	0.244	1.90782	1.4146	-0.014	-8.34178	6800000	6850000
OY776061.1	137	0.192	0.215333	0.939033	0.696267	-0.0233333	-13.903	6850000	6900000
OY776061.1	138	0.262	0.224667	1.2043	0.892953	0.0373333	22.2447	6900000	6950000
OY776061.1	139	0.280667	0.346	0.774539	0.574299	-0.0653333	-38.9283	6950000	7000000
OY776061.1	140	0.205333	0.276	1.02031	0.756534	-0.0706667	-42.1061	7000000	7050000
OY776061.1	141	0.263333	0.130667	5.35212	3.96845	0.132667	79.0482	7050000	7100000
OY776061.1	142	0.420667	0.45	1.19794	0.888241	-0.0293333	-17.478	7100000	7150000
OY776061.1	143	0.355333	0.348667	1.05932	0.785457	0.00666667	3.97227	7150000	7200000
OY776061.1	144	0.233333	0.272667	0.726342	0.538562	-0.0393333	-23.4364	7200000	7250000
OY776061.1	145	0.168	0.210667	0.970714	0.719757	-0.0426667	-25.4226	7250000	7300000
OY776061.1	146	0.45	0.376667	1.40037	1.03833	0.0733333	43.695	7300000	7350000
OY776061.1	147	0.26	0.216667	2.48838	1.84507	0.0433333	25.8198	7350000	7400000
OY776061.1	148	0.35	0.42	0.928895	0.688749	-0.07	-41.7089	7400000	7450000
OY776061.1	149	0.319333	0.238	1.62321	1.20357	0.0813333	48.4617	7450000	7500000
OY776061.1	150	0.329333	0.228	1.78728	1.32522	0.101333	60.3786	7500000	7550000
OY776061.1	151	0.308667	0.24	1.35268	1.00297	0.0686667	40.9144	7550000	7600000
OY776061.1	152	0.302	0.383333	0.871318	0.646058	-0.0813333	-48.4617	7600000	7650000
OY776061.1	153	0.392667	0.331333	1.16903	0.866804	0.0613333	36.5449	7650000	7700000
OY776061.1	154	0.428667	0.566667	0.909215	0.674158	-0.138	-82.2261	7700000	7750000
OY776061.1	155	0.599333	0.612	0.9813	0.727607	-0.0126667	-7.54732	7750000	7800000
OY776061.1	156	0.458	0.514	0.870908	0.645754	-0.056	-33.3671	7800000	7850000
OY776061.1	157	0.596	0.307333	1.91008	1.41627	0.288667	171.999	7850000	7900000
OY776061.1	158	0.356667	0.294667	1.32704	0.983966	0.062	36.9421	7900000	7950000
OY776061.1	159	0.157037	0.163704	1.11764	0.828698	-0.00666667	-3.97227	7950000	8000000
OY776061.1	160	0.440667	0.382667	1.13156	0.839022	0.058	34.5588	8000000	8050000
OY776061.1	161	0.607333	0.478	1.45326	1.07755	0.129333	77.0621	8050000	8100000
OY776061.1	162	0.515333	0.538667	1.04153	0.772264	-0.0233333	-13.903	8100000	8150000
OY776061.1	163	0.586667	0.582667	1.09912	0.814966	0.004	2.38336	8150000	8200000
OY776061.1	164	0.223333	0.257333	0.941383	0.698009	-0.034	-20.2586	8200000	8250000
OY776061.1	165	0.157333	0.363333	0.432371	0.320591	-0.206	-122.743	8250000	8300000
OY776061.1	166	0.328667	0.508	0.656643	0.486882	-0.179333	-106.854	8300000	8350000
OY776061.1	167	0.183333	0.192	0.973706	0.721975	-0.00866667	-5.16396	8350000	8400000
OY776061.1	168	0.136296	0.0985185	1.42148	1.05399	0.0377778	22.5096	8400000	8450000
OY776061.1	169	0.074	0.148667	0.482344	0.357644	-0.0746667	-44.4895	8450000	8500000
OY776061.1	170	0.145333	0.217333	1.13267	0.839843	-0.072	-42.9006	8500000	8550000
OY776061.1	171	0.115833	0.0758333	3.77686	2.80044	0.04	23.8336	8550000	8590000
OY776061.1	172	0.292222	0.255556	1.84196	1.36576	0.0366667	21.8475	8610000	8640000
OY776062.1	0	0.360667	0.266	1.40784	1.04388	0.0946667	56.4063	0	50000
OY776062.1	1	0.450667	0.362667	1.31564	0.975507	0.088	52.434	50000	100000
OY776062.1	2	0.370667	0.371333	1.053	0.780768	-0.000666667	-0.397227	100000	150000
OY776062.1	3	0.436	0.422667	1.07503	0.797103	0.0133333	7.94455	150000	200000
OY776062.1	4	0.322	0.375333	0.805405	0.597185	-0.0533333	-31.7782	200000	250000
OY776062.1	5	0.559333	0.584	1.02291	0.758457	-0.0246667	-14.6974	250000	300000
OY776062.1	6	0.356	0.382	1.25141	0.927882	-0.026	-15.4919	300000	350000
OY776062.1	7	0.280667	0.311333	0.920217	0.682315	-0.0306667	-18.2725	350000	400000
OY776062.1	8	0.217333	0.184	1.34903	1.00027	0.0333333	19.8614	400000	450000
OY776062.1	9	0.259333	0.146	1.80174	1.33594	0.113333	67.5287	450000	500000
OY776062.1	10	0.321333	0.232667	1.69444	1.25638	0.0886667	52.8312	500000	550000
OY776062.1	11	0.384667	0.294667	1.62486	1.20479	0.09	53.6257	550000	600000
OY776062.1	12	0.271333	0.272667	0.985547	0.730756	-0.00133333	-0.794455	600000	650000
OY776062.1	13	0.356	0.342667	1.08951	0.807839	0.0133333	7.94455	650000	700000
OY776062.1	14	0.418667	0.381333	1.34582	0.997885	0.0373333	22.2447	700000	750000
OY776062.1	15	0.450667	0.284667	1.59929	1.18583	0.166	98.9096	750000	800000
OY776062.1	16	0.603333	0.462667	1.58178	1.17285	0.140667	83.815	800000	850000
OY776062.1	17	0.401333	0.317333	1.2422	0.921057	0.084	50.0507	850000	900000
OY776062.1	18	0.484667	0.301333	1.75329	1.30001	0.183333	109.238	900000	950000
OY776062.1	19	0.207333	0.184	1.09818	0.814268	0.0233333	13.903	950000	1000000
OY776062.1	20	0.192381	0.224762	0.880967	0.653212	-0.032381	-19.2939	1000000	1050000
OY776062.1	21	0.369333	0.337333	1.17357	0.870172	0.032	19.0669	1050000	1100000
OY776062.1	22	0.318667	0.248667	1.21203	0.898683	0.07	41.7089	1100000	1150000
OY776062.1	23	0.495333	0.43	1.19611	0.886884	0.0653333	38.9283	1150000	1200000
OY776062.1	24	0.209333	0.156	4.92692	3.65317	0.0533333	31.7782	1200000	1250000
OY776062.1	25	0.378667	0.416	0.805641	0.59736	-0.0373333	-22.2447	1250000	1300000
OY776062.1	26	0.246	0.311333	0.954765	0.707932	-0.0653333	-38.9283	1300000	1350000
OY776062.1	27	0.302667	0.342667	1.19973	0.889563	-0.04	-23.8336	1350000	1400000
OY776062.1	28	0.293333	0.538667	0.753769	0.558898	-0.245333	-146.18	1400000	1450000
OY776062.1	29	0.442	0.339333	1.40201	1.03955	0.102667	61.173	1450000	1500000
OY776062.1	30	0.298	0.363333	0.975972	0.723656	-0.0653333	-38.9283	1500000	1550000
OY776062.1	31	0.242667	0.176667	1.9705	1.46107	0.066	39.3255	1550000	1600000
OY776062.1	32	0.178667	0.168	1.17824	0.873631	0.0106667	6.35564	1600000	1650000
OY776062.1	33	0.176667	0.198	1.75339	1.30009	-0.0213333	-12.7113	1650000	1700000
OY776062.1	34	0.408	0.336667	1.13555	0.841982	0.0713333	42.5033	1700000	1750000
OY776062.1	35	0.205333	0.184	1.53972	1.14166	0.0213333	12.7113	1750000	1800000
OY776062.1	36	0.299333	0.165333	2.38877	1.77121	0.134	79.8427	1800000	1850000
OY776062.1	37	0.311333	0.344	0.865782	0.641953	-0.0326667	-19.4641	1850000	1900000
OY776062.1	38	0.238	0.148667	1.95171	1.44714	0.0893333	53.2285	1900000	1950000
OY776062.1	39	0.214667	0.217333	1.07834	0.799559	-0.00266667	-1.58891	1950000	2000000
OY776062.1	40	0.471333	0.552	0.830243	0.615602	-0.0806667	-48.0645	2000000	2050000
OY776062.1	41	0.619333	0.583333	1.25586	0.931187	0.036	21.4503	2050000	2100000
OY776062.1	42	0.393333	0.25	1.559	1.15595	0.143333	85.4039	2100000	2150000
OY776062.1	43	0.785333	0.680667	1.16057	0.86053	0.104667	62.3647	2150000	2200000
OY776062.1	44	0.3	0.307333	1.05141	0.779591	-0.00733333	-4.3695	2200000	2250000
OY776062.1	45	0.326	0.272	1.52044	1.12736	0.054	32.1754	2250000	2300000
OY776062.1	46	0.684	0.446	1.59207	1.18047	0.238	141.81	2300000	2350000
OY776062.1	47	0.287333	0.254667	1.14609	0.849797	0.0326667	19.4641	2350000	2400000
OY776062.1	48	0.326	0.294667	1.38722	1.02858	0.0313333	18.6697	2400000	2450000
OY776062.1	49	0.283333	0.434	0.69862	0.518008	-0.150667	-89.7734	2450000	2500000
OY776062.1	50	0.196	0.314	0.849226	0.629678	-0.118	-70.3092	2500000	2550000
OY776062.1	51	0.101905	0.0314286	2.22222	1.64772	0.0704762	41.9926	2550000	2600000
OY776062.1	52	0.219259	0.208148	1.12101	0.831195	0.0111111	6.62046	2600000	2650000
OY776062.1	53	0.309333	0.296667	1.37795	1.02171	0.0126667	7.54732	2650000	2700000
OY776062.1	54	0.263333	0.267333	1.09567	0.81241	-0.004	-2.38336	2700000	2750000
OY776062.1	55	0.0686667	0.222	0.602296	0.446585	-0.153333	-91.3623	2750000	2800000
OY776062.1	56	0.410667	0.66	0.673232	0.499183	-0.249333	-148.563	2800000	2850000
OY776062.1	57	0.173333	0.22	0.952932	0.706573	-0.0466667	-27.8059	2850000	2900000
OY776062.1	58	0.102667	0.224667	0.580102	0.430129	-0.122	-72.6926	2900000	2950000
OY776062.1	59	0.148889	0.251111	0.758284	0.562247	-0.102222	-60.9082	2950000	3000000
OY776062.1	60	0.094	0.173333	0.562254	0.416895	-0.0793333	-47.2701	3000000	3050000
OY776062.1	61	0.330667	0.314667	1.03029	0.763934	0.016	9.53346	3050000	3100000
OY776062.1	62	0.444	0.448	1.23387	0.914878	-0.004	-2.38336	3100000	3150000
OY776062.1	63	0.273333	0.276667	1.35833	1.00716	-0.00333333	-1.98614	3150000	3200000
OY776062.1	64	0.288	0.304667	0.830879	0.616074	-0.0166667	-9.93068	3200000	3250000
OY776062.1	65	0.237037	0.20963	1.28891	0.955692	0.0274074	16.3305	3250000	3295000
OY776062.1	66	0.220952	0.0990476	6.86384	5.08935	0.121905	72.6359	3300000	3350000
OY776062.1	67	0.140667	0.154	0.8646	0.641077	-0.0133333	-7.94455	3350000	3400000
OY776062.1	68	0.186	0.127333	1.27839	0.947891	0.0586667	34.956	3400000	3450000
OY776062.1	69	0.26	0.225333	1.2272	0.909931	0.0346667	20.6558	3450000	3500000
OY776062.1	70	0.169333	0.256667	0.673322	0.499249	-0.0873333	-52.0368	3500000	3550000
OY776062.1	71	0.279333	0.362667	0.765657	0.567714	-0.0833333	-49.6534	3550000	3600000
OY776062.1	72	0.243333	0.282667	0.870802	0.645675	-0.0393333	-23.4364	3600000	3650000
OY776062.1	73	0.199333	0.286	0.666861	0.494459	-0.0866667	-51.6396	3650000	3700000
OY776062.1	74	0.284	0.422667	0.669831	0.496661	-0.138667	-82.6233	3700000	3750000
OY776062.1	75	0.198667	0.386667	0.642816	0.47663	-0.188	-112.018	3750000	3800000
OY776062.1	76	0.115333	0.221333	0.539006	0.399658	-0.106	-63.1592	3800000	3850000
OY776062.1	77	0.144	0.177333	0.801006	0.593923	-0.0333333	-19.8614	3850000	3900000
OY776062.1	78	0.118	0.132	0.885038	0.656231	-0.014	-8.34178	3900000	3950000
OY776062.1	79	0.166	0.175333	0.83819	0.621494	-0.00933333	-5.56118	3950000	4000000
OY776062.1	80	0.097037	0.0807407	1.71447	1.27123	0.0162963	9.71	4000000	4050000
OY776062.1	81	0.198	0.240667	1.22349	0.907183	-0.0426667	-25.4226	4050000	4100000
OY776062.1	82	0.244	0.272667	0.794564	0.589147	-0.0286667	-17.0808	4100000	4150000
OY776062.1	83	0.306	0.404	0.750872	0.55675	-0.098	-58.3924	4150000	4200000
OY776062.1	84	0.482	0.402667	1.43988	1.06763	0.0793333	47.2701	4200000	4250000
OY776062.1	85	0.264667	0.178	2.25378	1.67111	0.0866667	51.6396	4250000	4300000
OY776062.1	86	0.282667	0.264667	1.39749	1.0362	0.018	10.7251	4300000	4350000
OY776062.1	87	0.203333	0.228	1.55411	1.15233	-0.0246667	-14.6974	4350000	4400000
OY776062.1	88	0.143333	0.13	1.20499	0.893469	0.0133333	7.94455	4400000	4450000
OY776062.1	89	0.229333	0.258667	0.942454	0.698803	-0.0293333	-17.478	4450000	4500000
OY776062.1	90	0.253333	0.208667	1.63889	1.21519	0.0446667	26.6142	4500000	4550000
OY776062.1	91	0.214	0.172667	1.27423	0.944808	0.0413333	24.6281	4550000	4600000
OY776062.1	92	0.334	0.288667	1.35018	1.00112	0.0453333	27.0115	4600000	4650000
OY776062.1	93	0.314667	0.278	1.07714	0.798668	0.0366667	21.8475	4650000	4700000
OY776062.1	94	0.427407	0.526667	0.956997	0.709587	-0.0992593	-59.1427	4700000	4750000
OY776062.1	95	0.163333	0.225333	1.1574	0.858183	-0.062	-36.9421	4750000	4800000
OY776062.1	96	0.0711111	0.0533333	1.07064	0.793852	0.0177778	10.5927	4800000	4850000
OY776062.1	97	0.0793333	0.110667	0.566853	0.420305	-0.0313333	-18.6697	4850000	4900000
OY776062.1	98	0.166667	0.148667	1.00598	0.745908	0.018	10.7251	4900000	4950000
OY776062.1	99	0.15	0.124667	1.62529	1.2051	0.0253333	15.0946	4950000	5000000
OY776062.1	100	0.354667	0.234667	1.54849	1.14817	0.12	71.5009	5000000	5050000
OY776062.1	101	0.552667	0.370667	1.6377	1.21431	0.182	108.443	5050000	5100000
OY776062.1	102	0.328889	0.237037	1.93018	1.43117	0.0918519	54.7291	5105000	5150000
OY776062.1	103	0.664667	0.477333	3.79048	2.81054	0.187333	111.621	5150000	5200000
OY776062.1	104	0.324667	0.376667	1.22895	0.911234	-0.052	-30.9837	5200000	5250000
OY776062.1	105	0.303333	0.309333	1.03657	0.768584	-0.006	-3.57505	5250000	5300000
OY776062.1	106	0.339333	0.508667	0.678099	0.502791	-0.169333	-100.896	5300000	5350000
OY776062.1	107	0.237333	0.247333	1.34491	0.997215	-0.01	-5.95841	5350000	5400000
OY776062.1	108	0.113333	0.109167	1.57589	1.16848	0.00416667	2.48267	5400000	5450000
OY776062.1	109	0.131333	0.170667	0.817586	0.606217	-0.0393333	-23.4364	5450000	5500000
OY776062.1	110	0.154667	0.165333	0.983802	0.729461	-0.0106667	-6.35564	5500000	5550000
OY776062.1	111	0.109333	0.133333	0.847569	0.628449	-0.024	-14.3002	5550000	5600000
OY776062.1	112	0.336	0.316667	1.28143	0.950147	0.0193333	11.5196	5600000	5650000
OY776062.1	113	0.298667	0.26	1.1183	0.82919	0.0386667	23.0392	5650000	5700000
OY776062.1	114	0.253333	0.312667	0.895699	0.664136	-0.0593333	-35.3532	5700000	5750000
OY776062.1	115	0.0966667	0.141333	0.641873	0.475931	-0.0446667	-26.6142	5750000	5800000
OY776062.1	116	0.234815	0.234074	0.957503	0.709962	0.000740741	0.441364	5800000	5850000
OY776062.1	117	0.415333	0.482	0.899386	0.666869	-0.0666667	-39.7227	5850000	5900000
OY776062.1	118	0.408667	0.528	0.741154	0.549545	-0.119333	-71.1037	5900000	5950000
OY776062.1	119	0.370667	0.441333	0.883365	0.65499	-0.0706667	-42.1061	5950000	6000000
OY776062.1	120	0.361333	0.452667	0.789091	0.585089	-0.0913333	-54.4202	6000000	6050000
OY776062.1	121	0.345333	0.312667	1.24285	0.921536	0.0326667	19.4641	6050000	6100000
OY776062.1	122	0.436	0.449333	0.930304	0.689794	-0.0133333	-7.94455	6100000	6150000
OY776062.1	123	0.462	0.398	1.56679	1.16173	0.064	38.1338	6150000	6200000
OY776062.1	124	0.34	0.424667	0.863535	0.640287	-0.0846667	-50.4479	6200000	6250000
OY776062.1	125	0.160667	0.205333	0.736693	0.546238	-0.0446667	-26.6142	6250000	6300000
OY776062.1	126	0.503333	0.536	0.947605	0.702623	-0.0326667	-19.4641	6300000	6350000
OY776062.1	127	0.454667	0.276667	6.08072	4.50868	0.178	106.06	6350000	6400000
OY776062.1	128	0.238667	0.293333	1.20035	0.890028	-0.0546667	-32.5726	6400000	6450000
OY776062.1	129	0.331333	0.182667	3.29285	2.44156	0.148667	88.5817	6450000	6500000
OY776062.1	130	0.414	0.274667	2.02433	1.50098	0.139333	83.0205	6500000	6550000
OY776062.1	131	0.363333	0.402	1.88227	1.39565	-0.0386667	-23.0392	6550000	6600000
OY776062.1	132	0.363333	0.448667	0.904819	0.670898	-0.0853333	-50.8451	6600000	6650000
OY776062.1	133	0.431333	0.679333	0.675141	0.500598	-0.248	-147.769	6650000	6700000
OY776062.1	134	0.438	0.663333	0.688926	0.510819	-0.225333	-134.263	6700000	6750000
OY776062.1	135	0.658	0.448667	1.49303	1.10704	0.209333	124.729	6750000	6800000
OY776062.1	136	0.725333	0.549333	1.30759	0.969542	0.176	104.868	6800000	6850000
OY776062.1	137	0.452	0.578667	0.859737	0.637471	-0.126667	-75.4732	6850000	6900000
OY776062.1	138	0.26	0.456667	0.453327	0.336129	-0.196667	-117.182	6900000	6950000
OY776062.1	139	0.298667	0.253333	1.20434	0.892987	0.0453333	27.0115	6950000	7000000
OY776062.1	140	0.554667	0.404	1.58123	1.17244	0.150667	89.7734	7000000	7050000
OY776062.1	141	0.749333	0.687333	1.09612	0.81274	0.062	36.9421	7050000	7100000
OY776062.1	142	0.708667	0.628667	1.12889	0.837039	0.08	47.6673	7100000	7150000
OY776062.1	143	0.757333	0.583333	1.52026	1.12723	0.174	103.676	7150000	7200000
OY776062.1	144	0.578667	0.418	1.66731	1.23626	0.160667	95.7318	7200000	7250000
OY776062.1	145	0.536	0.504	1.15126	0.853624	0.032	19.0669	7250000	7300000
OY776062.1	146	0.414667	0.451333	1.00523	0.74535	-0.0366667	-21.8475	7300000	7350000
OY776062.1	147	0.901333	0.934	0.981158	0.727501	-0.0326667	-19.4641	7350000	7400000
OY776062.1	148	0.711333	0.804667	0.901599	0.668511	-0.0933333	-55.6118	7400000	7450000
OY776062.1	149	0.422	0.45	0.968653	0.718229	-0.028	-16.6836	7450000	7500000
OY776062.1	150	0.383333	0.516	0.7828	0.580424	-0.132667	-79.0482	7500000	7550000
OY776062.1	151	0.304	0.459333	0.663604	0.492044	-0.155333	-92.554	7550000	7600000
OY776062.1	152	0.468667	0.468667	1.02251	0.758165	0	1.28725e-15	7600000	7650000
OY776062.1	153	0.47	0.484667	1.09813	0.814231	-0.0146667	-8.739	7650000	7700000
OY776062.1	154	0.392	0.372667	1.15281	0.854777	0.0193333	11.5196	7700000	7750000
OY776062.1	155	0.342	0.383333	0.997714	0.739777	-0.0413333	-24.6281	7750000	7800000
OY776062.1	156	0.246667	0.267333	0.971393	0.720261	-0.0206667	-12.314	7800000	7850000
OY776062.1	157	0.279333	0.281333	1.07729	0.798779	-0.002	-1.19168	7850000	7900000
OY776062.1	158	0.417333	0.517333	0.875585	0.649222	-0.1	-59.5841	7900000	7950000
OY776062.1	159	0.434	0.453333	0.972237	0.720887	-0.0193333	-11.5196	7950000	8000000
OY776062.1	160	0.376667	0.449333	0.89166	0.661141	-0.0726667	-43.2978	8000000	8050000
OY776062.1	161	0.440667	0.446667	0.973828	0.722067	-0.006	-3.57505	8050000	8100000
OY776062.1	162	0.627333	0.722667	0.924718	0.685652	-0.0953333	-56.8035	8100000	8150000
OY776062.1	163	0.381333	0.559333	0.772868	0.57306	-0.178	-106.06	8150000	8200000
OY776062.1	164	0.556	0.542667	1.02244	0.758111	0.0133333	7.94455	8200000	8250000
OY776062.1	165	0.371333	0.551333	0.749179	0.555496	-0.18	-107.251	8250000	8300000
OY776062.1	166	0.432667	0.468	1.00215	0.743063	-0.0353333	-21.0531	8300000	8350000
OY776062.1	167	0.47	0.487333	1.00291	0.743626	-0.0173333	-10.3279	8350000	8400000
OY776062.1	168	0.138667	0.169333	2.19884	1.63038	-0.0306667	-18.2725	8400000	8450000
OY776062.1	169	0.176667	0.135556	1.60265	1.18832	0.0411111	24.4957	8450000	8480000
OY776063.1	0	0.236296	0.237778	1.03002	0.76373	-0.00148148	-0.882728	0	50000
OY776063.1	1	0.522667	0.555333	0.934504	0.692909	-0.0326667	-19.4641	50000	100000
OY776063.1	2	0.374	0.452667	0.809436	0.600174	-0.0786667	-46.8728	100000	150000
OY776063.1	3	0.686	0.643333	1.2519	0.928252	0.0426667	25.4226	150000	200000
OY776063.1	4	0.660667	0.564667	1.15426	0.855851	0.096	57.2007	200000	250000
OY776063.1	5	0.66	0.648667	1.12283	0.832544	0.0113333	6.75287	250000	300000
OY776063.1	6	0.525333	0.495333	1.07652	0.798213	0.03	17.8752	300000	350000
OY776063.1	7	0.484667	0.437333	1.23066	0.9125	0.0473333	28.2031	350000	400000
OY776063.1	8	0.446667	0.529333	0.887475	0.658038	-0.0826667	-49.2562	400000	450000
OY776063.1	9	0.556667	0.578667	0.9803	0.726865	-0.022	-13.1085	450000	500000
OY776063.1	10	0.548667	0.436	1.68128	1.24662	0.112667	67.1314	500000	550000
OY776063.1	11	0.497333	0.366667	1.40971	1.04526	0.130667	77.8566	550000	600000
OY776063.1	12	0.515333	0.529333	0.967102	0.717079	-0.014	-8.34178	600000	650000
OY776063.1	13	0.56	0.633333	0.896883	0.665013	-0.0733333	-43.695	650000	700000
OY776063.1	14	0.571333	0.584	1.0269	0.761421	-0.0126667	-7.54732	700000	750000
OY776063.1	15	0.712667	0.726667	0.973367	0.721724	-0.014	-8.34178	750000	800000
OY776063.1	16	0.642	0.558	1.22577	0.908876	0.084	50.0507	800000	850000
OY776063.1	17	0.493333	0.313333	1.85096	1.37243	0.18	107.251	850000	900000
OY776063.1	18	0.316667	0.218	3.61177	2.67802	0.0986667	58.7897	900000	950000
OY776063.1	19	0.506667	0.433333	1.63108	1.2094	0.0733333	43.695	950000	1000000
OY776063.1	20	0.365333	0.422667	1.21513	0.900982	-0.0573333	-34.1616	1000000	1050000
OY776063.1	21	0.342667	0.335333	1.09639	0.812939	0.00733333	4.3695	1050000	1100000
OY776063.1	22	0.490667	0.660667	0.746673	0.553637	-0.17	-101.293	1100000	1150000
OY776063.1	23	0.556	0.502667	1.1575	0.858253	0.0533333	31.7782	1150000	1200000
OY776063.1	24	0.456	0.327333	1.46515	1.08637	0.128667	76.6649	1200000	1250000
OY776063.1	25	1.016	0.934667	1.13502	0.841584	0.0813333	48.4617	1250000	1300000
OY776063.1	26	0.760667	0.812667	1.00402	0.744454	-0.052	-30.9837	1300000	1350000
OY776063.1	27	0.594667	0.482	1.56844	1.16296	0.112667	67.1314	1350000	1400000
OY776063.1	28	0.742	0.532667	1.63438	1.21185	0.209333	124.729	1400000	1450000
OY776063.1	29	0.503333	0.531333	0.931846	0.690938	-0.028	-16.6836	1450000	1500000
OY776063.1	30	0.538	0.519333	1.23362	0.914696	0.0186667	11.1224	1500000	1550000
OY776063.1	31	0.241333	0.279333	0.821985	0.609479	-0.038	-22.642	1550000	1600000
OY776063.1	32	0.395333	0.514	0.856966	0.635417	-0.118667	-70.7065	1600000	1650000
OY776063.1	33	0.42	0.442667	1.35852	1.00731	-0.0226667	-13.5057	1650000	1700000
OY776063.1	34	0.648	0.557333	1.1667	0.865075	0.0906667	54.0229	1700000	1750000
OY776063.1	35	0.662	0.705333	0.937662	0.69525	-0.0433333	-25.8198	1750000	1800000
OY776063.1	36	0.298	0.379333	0.937857	0.695395	-0.0813333	-48.4617	1800000	1850000
OY776063.1	37	0.538	0.609333	0.848194	0.628912	-0.0713333	-42.5033	1850000	1900000
OY776063.1	38	0.132667	0.27	0.858588	0.636619	-0.137333	-81.8288	1900000	1950000
OY776063.1	39	0.368	0.483333	0.748436	0.554945	-0.115333	-68.7203	1950000	2000000
OY776063.1	40	0.369333	0.388	1.06255	0.787853	-0.0186667	-11.1224	2000000	2050000
OY776063.1	41	0.212	0.305333	0.668096	0.495375	-0.0933333	-55.6118	2050000	2100000
OY776063.1	42	0.295333	0.388667	0.659725	0.489167	-0.0933333	-55.6118	2100000	2150000
OY776063.1	43	0.306	0.48	0.632315	0.468844	-0.174	-103.676	2150000	2200000
OY776063.1	44	0.437333	0.388	1.10241	0.817407	0.0493333	29.3948	2200000	2250000
OY776063.1	45	0.477333	0.437333	1.99032	1.47576	0.04	23.8336	2250000	2300000
OY776063.1	46	0.627333	0.496	1.38529	1.02716	0.131333	78.2538	2300000	2350000
OY776063.1	47	0.346667	0.522	0.64431	0.477738	-0.175333	-104.471	2350000	2400000
OY776063.1	48	0.186667	0.324	0.45055	0.33407	-0.137333	-81.8288	2400000	2450000
OY776063.1	49	0.362222	0.553333	0.655187	0.485803	-0.191111	-113.872	2450000	2500000
OY776063.1	50	0.534667	0.601333	0.828822	0.614548	-0.0666667	-39.7227	2500000	2550000
OY776063.1	51	0.559333	0.564	1.05095	0.779247	-0.00466667	-2.78059	2550000	2600000
OY776063.1	52	0.735333	0.707333	0.964158	0.714896	0.028	16.6836	2600000	2650000
OY776063.1	53	0.493333	0.480667	1.08409	0.803825	0.0126667	7.54732	2650000	2700000
OY776063.1	54	0.214	0.194667	1.14987	0.852599	0.0193333	11.5196	2700000	2750000
OY776063.1	55	0.448667	0.421333	1.65706	1.22866	0.0273333	16.2863	2750000	2800000
OY776063.1	56	0.680667	0.613333	1.19371	0.885099	0.0673333	40.12	2800000	2850000
OY776063.1	57	0.217333	0.328667	0.632527	0.469001	-0.111333	-66.337	2850000	2900000
OY776063.1	58	0.388667	0.386667	0.913685	0.677472	0.002	1.19168	2900000	2950000
OY776063.1	59	0.338667	0.423333	0.930888	0.690227	-0.0846667	-50.4479	2950000	3000000
OY776063.1	60	0.294667	0.525333	0.667517	0.494945	-0.230667	-137.441	3000000	3050000
OY776063.1	61	0.411333	0.404	1.15619	0.85728	0.00733333	4.3695	3050000	3100000
OY776063.1	62	0.654	0.758667	0.824402	0.611271	-0.104667	-62.3647	3100000	3150000
OY776063.1	63	0.474667	0.547333	0.885493	0.656569	-0.0726667	-43.2978	3150000	3200000
OY776063.1	64	0.296296	0.271111	1.10637	0.820345	0.0251852	15.0064	3200000	3250000
OY776063.1	65	0.176	0.16	1.49748	1.11034	0.016	9.53346	3250000	3300000
OY776063.1	66	0.241333	0.236667	1.16663	0.865022	0.00466667	2.78059	3300000	3350000
OY776063.1	67	0.312667	0.218667	1.71679	1.27295	0.094	56.0091	3350000	3400000
OY776063.1	68	0.202963	0.264444	1.04183	0.772491	-0.0614815	-36.6332	3400000	3450000
OY776063.1	69	0.182	0.154	3.1856	2.36203	0.028	16.6836	3450000	3500000
OY776063.1	70	0.305333	0.498	0.68679	0.509235	-0.192667	-114.799	3500000	3550000
OY776063.1	71	0.420667	0.327333	1.34215	0.995165	0.0933333	55.6118	3550000	3600000
OY776063.1	72	0.181333	0.201333	1.38922	1.03007	-0.02	-11.9168	3600000	3650000
OY776063.1	73	0.599333	0.338	1.88162	1.39517	0.261333	155.713	3650000	3700000
OY776063.1	74	0.438667	0.268	2.21733	1.64408	0.170667	101.69	3700000	3750000
OY776063.1	75	0.339333	0.403333	1.02395	0.759228	-0.064	-38.1338	3750000	3800000
OY776063.1	76	0.142667	0.182	0.895162	0.663738	-0.0393333	-23.4364	3800000	3850000
OY776063.1	77	0.273333	0.288667	1.21111	0.898003	-0.0153333	-9.13623	3850000	3900000
OY776063.1	78	0.555556	0.431111	1.22332	0.907057	0.124444	74.1491	3900000	3950000
OY776063.1	79	0.401333	0.225333	2.06093	1.52812	0.176	104.868	3950000	4000000
OY776063.1	80	0.156	0.223333	0.905863	0.671672	-0.0673333	-40.12	4000000	4050000
OY776063.1	81	0.234	0.236667	1.2048	0.893322	-0.00266667	-1.58891	4050000	4100000
OY776063.1	82	0.199333	0.199333	1.14289	0.847422	2.77556e-17	1.66988e-14	4100000	4150000
OY776063.1	83	0.284667	0.282	1.26497	0.937943	0.00266667	1.58891	4150000	4200000
OY776063.1	84	0.120741	0.057037	3.73794	2.77158	0.0637037	37.9573	4200000	4250000
OY776063.1	85	0.107407	0.144444	0.880623	0.652957	-0.037037	-22.0682	4250000	4300000
OY776063.1	86	0.318	0.220667	1.62508	1.20495	0.0973333	57.9952	4300000	4350000
OY776063.1	87	0.164667	0.248	0.644696	0.478024	-0.0833333	-49.6534	4350000	4400000
OY776063.1	88	0.0753333	0.334	0.230669	0.171035	-0.258667	-154.124	4400000	4450000
OY776063.1	89	0.409333	0.192	3.09714	2.29644	0.217333	129.496	4450000	4500000
OY776063.1	90	0.273333	0.145333	2.56728	1.90356	0.128	76.2677	4500000	4550000
OY776063.1	91	0.278	0.282	1.32693	0.983879	-0.004	-2.38336	4550000	4600000
OY776063.1	92	0.216667	0.282667	0.779455	0.577944	-0.066	-39.3255	4600000	4650000
OY776063.1	93	0.358667	0.468667	0.779124	0.577699	-0.11	-65.5425	4650000	4700000
OY776063.1	94	0.483333	0.328	1.7187	1.27437	0.155333	92.554	4700000	4750000
OY776063.1	95	0.303333	0.233333	1.43621	1.06491	0.07	41.7089	4750000	4800000
OY776063.1	96	0.243333	0.178	1.99409	1.47857	0.0653333	38.9283	4800000	4850000
OY776063.1	97	0.240667	0.0806667	8.09196	5.99996	0.16	95.3346	4850000	4900000
OY776063.1	98	0.226667	0.0755556	5.19738	3.85371	0.151111	90.0382	4900000	4950000
OY776063.1	99	0.338667	0.140667	4.84117	3.58959	0.198	117.977	4950000	5000000
OY776063.1	100	0.327333	0.408	0.834795	0.618977	-0.0806667	-48.0645	5000000	5050000
OY776063.1	101	0.522667	0.581333	0.921289	0.68311	-0.0586667	-34.956	5050000	5100000
OY776063.1	102	0.31	0.342667	0.890885	0.660566	-0.0326667	-19.4641	5100000	5150000
OY776063.1	103	0.186	0.178	1.06424	0.789106	0.008	4.76673	5150000	5200000
OY776063.1	104	0.12	0.0911111	2.56466	1.90162	0.0288889	17.2132	5200000	5245000
OY776063.1	105	0.460667	0.437333	1.15703	0.857908	0.0233333	13.903	5250000	5300000
OY776063.1	106	0.209333	0.303333	0.705269	0.522938	-0.094	-56.0091	5300000	5350000
OY776063.1	107	0.320667	0.377333	1.00027	0.741675	-0.0566667	-33.7643	5350000	5400000
OY776063.1	108	0.43	0.516	0.864768	0.641201	-0.086	-51.2423	5400000	5450000
OY776063.1	109	0.381333	0.36	1.04118	0.772004	0.0213333	12.7113	5450000	5500000
OY776063.1	110	0.316667	0.374667	0.895748	0.664172	-0.058	-34.5588	5500000	5550000
OY776063.1	111	0.612	0.670667	0.88009	0.652562	-0.0586667	-34.956	5550000	5600000
OY776063.1	112	0.559333	0.51	1.18813	0.880967	0.0493333	29.3948	5600000	5650000
OY776063.1	113	0.814667	0.814	1.0641	0.789004	0.000666667	0.397227	5650000	5700000
OY776063.1	114	0.937333	0.843333	1.2127	0.899182	0.094	56.0091	5700000	5750000
OY776063.1	115	0.732	0.693333	1.00458	0.744869	0.0386667	23.0392	5750000	5800000
OY776063.1	116	0.536667	0.442	1.25511	0.930632	0.0946667	56.4063	5800000	5850000
OY776063.1	117	0.723333	0.579333	1.5278	1.13282	0.144	85.8011	5850000	5900000
OY776063.1	118	0.425333	0.372667	1.12508	0.834218	0.0526667	31.381	5900000	5950000
OY776063.1	119	0.294667	0.192	1.72283	1.27743	0.102667	61.173	5950000	6000000
OY776063.1	120	0.404667	0.294667	1.66429	1.23402	0.11	65.5425	6000000	6050000
OY776063.1	121	0.797333	0.689333	1.20659	0.894652	0.108	64.3508	6050000	6100000
OY776063.1	122	0.189333	0.214667	0.969545	0.718891	-0.0253333	-15.0946	6100000	6150000
OY776063.1	123	0.236	0.18	2.0185	1.49666	0.056	33.3671	6150000	6200000
OY776063.1	124	0.435333	0.530667	0.899778	0.66716	-0.0953333	-56.8035	6200000	6250000
OY776063.1	125	0.448	0.49	1.10935	0.822551	-0.042	-25.0253	6250000	6300000
OY776063.1	126	0.375333	0.346667	1.0413	0.772094	0.0286667	17.0808	6300000	6350000
OY776063.1	127	0.304	0.321333	1.0027	0.743476	-0.0173333	-10.3279	6350000	6400000
OY776063.1	128	0.306	0.326	0.931612	0.690764	-0.02	-11.9168	6400000	6450000
OY776063.1	129	0.287333	0.315333	0.917488	0.680292	-0.028	-16.6836	6450000	6500000
OY776063.1	130	0.307333	0.268667	1.34446	0.996876	0.0386667	23.0392	6500000	6550000
OY776063.1	131	0.523704	0.72963	0.723604	0.536532	-0.205926	-122.699	6550000	6600000
OY776063.1	132	0.308667	0.383333	0.699719	0.518822	-0.0746667	-44.4895	6600000	6650000
OY776063.1	133	0.409333	0.424	1.46777	1.08831	-0.0146667	-8.739	6650000	6700000
OY776063.1	134	0.592667	0.692	0.901415	0.668374	-0.0993333	-59.1869	6700000	6750000
OY776063.1	135	0.448667	0.542	0.880562	0.652912	-0.0933333	-55.6118	6750000	6800000
OY776063.1	136	0.459333	0.455333	1.08362	0.803473	0.004	2.38336	6800000	6850000
OY776063.1	137	0.440667	0.432	1.06641	0.790714	0.00866667	5.16396	6850000	6900000
OY776063.1	138	0.458	0.498	0.978604	0.725607	-0.04	-23.8336	6900000	6950000
OY776063.1	139	0.497333	0.494	0.924814	0.685724	0.00333333	1.98614	6950000	7000000
OY776063.1	140	0.448667	0.476667	0.951363	0.705409	-0.028	-16.6836	7000000	7050000
OY776063.1	141	0.21	0.283333	0.912958	0.676933	-0.0733333	-43.695	7050000	7100000
OY776063.1	142	0.321333	0.314667	1.19026	0.882548	0.00666667	3.97227	7100000	7150000
OY776063.1	143	0.497333	0.456	1.3406	0.994018	0.0413333	24.6281	7150000	7200000
OY776063.1	144	0.504	0.456	1.14079	0.845863	0.048	28.6004	7200000	7250000
OY776063.1	145	0.497333	0.446	1.10332	0.818082	0.0513333	30.5865	7250000	7300000
OY776063.1	146	0.358667	0.3	1.29441	0.959769	0.0586667	34.956	7300000	7350000
OY776063.1	147	0.317333	0.258667	1.2016	0.890951	0.0586667	34.956	7350000	7400000
OY776063.1	148	0.450667	0.424667	1.11526	0.826937	0.026	15.4919	7400000	7450000
OY776063.1	149	0.487333	0.313333	1.5872	1.17686	0.174	103.676	7450000	7500000
OY776063.1	150	0.335333	0.382667	1.06584	0.790293	-0.0473333	-28.2031	7500000	7550000
OY776063.1	151	0.404667	0.28	3.51648	2.60737	0.124667	74.2815	7550000	7600000
OY776063.1	152	0.195333	0.155333	9.0208	6.68867	0.04	23.8336	7600000	7650000
OY776063.1	153	0.331333	0.249333	1.51524	1.12351	0.082	48.859	7650000	7700000
OY776063.1	154	0.444667	0.376667	2.33282	1.72972	0.068	40.5172	7700000	7750000
OY776063.1	155	0.375333	0.247333	2.17926	1.61586	0.128	76.2677	7750000	7800000
OY776063.1	156	0.196667	0.103333	1.79825	1.33335	0.0933333	55.6118	7800000	7810000
OY776064.1	0	0.105833	0.0466667	3.87341	2.87203	0.0591667	35.2539	0	50000
OY776064.1	1	0.352667	0.234	2.37257	1.75919	0.118667	70.7065	50000	100000
OY776064.1	2	0.714667	0.615333	1.24269	0.921418	0.0993333	59.1869	100000	150000
OY776064.1	3	0.54	0.388	1.37686	1.0209	0.152	90.5678	150000	200000
OY776064.1	4	0.942	0.890667	1.05106	0.779335	0.0513333	30.5865	200000	250000
OY776064.1	5	0.538	0.563333	1.0081	0.747476	-0.0253333	-15.0946	250000	300000
OY776064.1	6	0.689333	0.564667	1.24853	0.925748	0.124667	74.2815	300000	350000
OY776064.1	7	0.419333	0.280667	1.81131	1.34304	0.138667	82.6233	350000	400000
OY776064.1	8	0.416	0.419333	1.09515	0.81202	-0.00333333	-1.98614	400000	450000
OY776064.1	9	0.702667	0.622	1.14931	0.852178	0.0806667	48.0645	450000	500000
OY776064.1	10	0.388	0.301333	1.5434	1.14439	0.0866667	51.6396	500000	550000
OY776064.1	11	0.236667	0.246	0.917874	0.680578	-0.00933333	-5.56118	550000	600000
OY776064.1	12	0.170667	0.184	1.07901	0.800057	-0.0133333	-7.94455	600000	650000
OY776064.1	13	0.315333	0.166667	2.20112	1.63207	0.148667	88.5817	650000	700000
OY776064.1	14	0.270667	0.146667	1.86407	1.38215	0.124	73.8843	700000	750000
OY776064.1	15	0.204	0.269333	1.02529	0.760221	-0.0653333	-38.9283	750000	800000
OY776064.1	16	0.232593	0.179259	3.54426	2.62797	0.0533333	31.7782	800000	850000
OY776064.1	17	0.234	0.36	0.546496	0.405212	-0.126	-75.076	850000	900000
OY776064.1	18	0.485333	0.489333	0.986018	0.731105	-0.004	-2.38336	900000	950000
OY776064.1	19	0.186	0.188667	0.75896	0.562747	-0.00266667	-1.58891	950000	1000000
OY776064.1	20	0.0742857	0.109524	0.898858	0.666478	-0.0352381	-20.9963	1000000	1050000
OY776064.1	21	0.0513333	0.109333	0.738005	0.54721	-0.058	-34.5588	1050000	1100000
OY776064.1	22	0.0488889	0.0703704	3.39578	2.51787	-0.0214815	-12.7995	1100000	1145000
OY776064.1	23	0.175	0.176667	1.07349	0.795966	-0.00166667	-0.993068	1150000	1200000
OY776064.1	24	0.19	0.273333	0.873493	0.64767	-0.0833333	-49.6534	1200000	1250000
OY776064.1	25	0.308667	0.360667	0.904451	0.670625	-0.052	-30.9837	1250000	1300000
OY776064.1	26	0.311333	0.33	0.995887	0.738422	-0.0186667	-11.1224	1300000	1350000
OY776064.1	27	0.524667	0.456667	1.15853	0.859018	0.068	40.5172	1350000	1400000
OY776064.1	28	0.328889	0.213333	1.98124	1.46903	0.115556	68.8527	1400000	1450000
OY776064.1	29	0.253333	0.134167	4.55963	3.38084	0.119167	71.0044	1450000	1500000
OY776064.1	30	0.176	0.11	2.58653	1.91784	0.066	39.3255	1500000	1550000
OY776064.1	31	0.180667	0.208667	0.87066	0.64557	-0.028	-16.6836	1550000	1600000
OY776064.1	32	0.234	0.29	0.939002	0.696244	-0.056	-33.3671	1600000	1650000
OY776064.1	33	0.514667	0.721333	0.680967	0.504918	-0.206667	-123.14	1650000	1700000
OY776064.1	34	0.769333	0.672667	1.21546	0.901227	0.0966667	57.598	1700000	1750000
OY776064.1	35	0.589333	0.641333	1.10544	0.819654	-0.052	-30.9837	1750000	1800000
OY776064.1	36	0.33	0.29	1.19674	0.88735	0.04	23.8336	1800000	1850000
OY776064.1	37	0.286667	0.322	1.03283	0.765811	-0.0353333	-21.0531	1850000	1900000
OY776064.1	38	0.291333	0.474667	0.639415	0.474108	-0.183333	-109.238	1900000	1950000
OY776064.1	39	0.432667	0.462	0.858895	0.636847	-0.0293333	-17.478	1950000	2000000
OY776064.1	40	0.134074	0.16963	0.69788	0.517458	-0.0355556	-21.1855	2000000	2050000
OY776064.1	41	0.142667	0.164667	0.819948	0.607968	-0.022	-13.1085	2050000	2100000
OY776064.1	42	0.684	0.617333	1.15162	0.853893	0.0666667	39.7227	2100000	2150000
OY776064.1	43	0.0681481	0.0940741	0.902231	0.668979	-0.0259259	-15.4477	2150000	2200000
OY776064.1	44	0.168	0.168667	1.23091	0.912688	-0.000666667	-0.397227	2200000	2250000
OY776064.1	45	0.306	0.170667	1.93733	1.43648	0.135333	80.6372	2250000	2300000
OY776064.1	46	0.078	0.108667	0.917982	0.680658	-0.0306667	-18.2725	2300000	2350000
OY776064.1	47	0.159167	0.235833	1.51588	1.12398	-0.0766667	-45.6811	2350000	2400000
OY776064.1	48	0.0585185	0.111111	0.474807	0.352056	-0.0525926	-31.3368	2400000	2450000
OY776064.1	49	0.118	0.143333	0.481884	0.357303	-0.0253333	-15.0946	2450000	2500000
OY776064.1	50	0.572	0.564667	1.04937	0.77808	0.00733333	4.3695	2500000	2550000
OY776064.1	51	0.624	0.502	1.21069	0.897692	0.122	72.6926	2550000	2600000
OY776064.1	52	0.436	0.34	1.86116	1.38	0.096	57.2007	2600000	2650000
OY776064.1	53	0.352	0.324	1.24559	0.92357	0.028	16.6836	2650000	2700000
OY776064.1	54	0.358519	0.24963	3.05909	2.26823	0.108889	64.8805	2700000	2750000
OY776064.1	55	0.446	0.617333	0.838992	0.622089	-0.171333	-102.087	2750000	2800000
OY776064.1	56	0.0851852	0.122963	0.61978	0.45955	-0.0377778	-22.5096	2805000	2850000
OY776064.1	57	0.355333	0.270667	1.76529	1.30891	0.0846667	50.4479	2850000	2900000
OY776064.1	58	0.509333	0.571333	0.930203	0.68972	-0.062	-36.9421	2900000	2950000
OY776064.1	59	0.212	0.215333	1.2195	0.904225	-0.00333333	-1.98614	2950000	3000000
OY776064.1	60	0.479333	0.460667	0.954676	0.707865	0.0186667	11.1224	3000000	3050000
OY776064.1	61	0.183333	0.21	1.05064	0.779022	-0.0266667	-15.8891	3050000	3100000
OY776064.1	62	0.406667	0.416667	1.0316	0.764905	-0.01	-5.95841	3100000	3150000
OY776064.1	63	0.399333	0.380667	1.16576	0.864378	0.0186667	11.1224	3150000	3200000
OY776064.1	64	0.405333	0.464	0.8973	0.665323	-0.0586667	-34.956	3200000	3250000
OY776064.1	65	0.273333	0.240667	1.36672	1.01339	0.0326667	19.4641	3250000	3300000
OY776064.1	66	0.439333	0.464	1.54502	1.14559	-0.0246667	-14.6974	3300000	3350000
OY776064.1	67	0.36	0.325333	1.24255	0.921313	0.0346667	20.6558	3350000	3400000
OY776064.1	68	0.283333	0.224	2.26798	1.68164	0.0593333	35.3532	3400000	3450000
OY776064.1	69	0.604667	0.385333	2.04198	1.51407	0.219333	130.688	3450000	3500000
OY776064.1	70	0.314	0.273333	2.66756	1.97792	0.0406667	24.2309	3500000	3550000
OY776064.1	71	0.21	0.209333	0.977279	0.724625	0.000666667	0.397227	3550000	3600000
OY776064.1	72	0.282	0.217333	1.8184	1.34829	0.0646667	38.5311	3600000	3650000
OY776064.1	73	0.248	0.26	0.899937	0.667278	-0.012	-7.15009	3650000	3700000
OY776064.1	74	0.303333	0.229333	1.30164	0.965132	0.074	44.0922	3700000	3750000
OY776064.1	75	0.414667	0.360667	1.34684	0.998647	0.054	32.1754	3750000	3800000
OY776064.1	76	0.248889	0.268148	1.43245	1.06212	-0.0192593	-11.4755	3800000	3850000
OY776064.1	77	0.392667	0.528667	0.830281	0.61563	-0.136	-81.0344	3850000	3900000
OY776064.1	78	0.334667	0.278	1.23665	0.916942	0.0566667	33.7643	3900000	3950000
OY776064.1	79	0.413333	0.335333	1.17329	0.869962	0.078	46.4756	3950000	4000000
OY776064.1	80	0.196	0.296	0.745879	0.553048	-0.1	-59.5841	4000000	4050000
OY776064.1	81	0.361333	0.354	2.66257	1.97422	0.00733333	4.3695	4050000	4100000
OY776064.1	82	0.204667	0.253333	0.968889	0.718404	-0.0486667	-28.9976	4100000	4150000
OY776064.1	83	0.446667	0.497333	0.837871	0.621258	-0.0506667	-30.1893	4150000	4200000
OY776064.1	84	0.273333	0.36	0.880935	0.653188	-0.0866667	-51.6396	4200000	4250000
OY776064.1	85	0.298667	0.42	0.656087	0.48647	-0.121333	-72.2954	4250000	4300000
OY776064.1	86	0.443333	0.490667	0.952272	0.706083	-0.0473333	-28.2031	4300000	4350000
OY776064.1	87	0.363333	0.552	0.669963	0.496759	-0.188667	-112.415	4350000	4400000
OY776064.1	88	0.163333	0.242	0.706622	0.523941	-0.0786667	-46.8728	4400000	4450000
OY776064.1	89	0.208	0.248667	0.941088	0.69779	-0.0406667	-24.2309	4450000	4500000
OY776064.1	90	0.269333	0.162667	1.64611	1.22055	0.106667	63.5564	4500000	4550000
OY776064.1	91	0.225333	0.401333	0.745295	0.552615	-0.176	-104.868	4550000	4600000
OY776064.1	92	0.556667	0.489333	1.13855	0.844201	0.0673333	40.12	4600000	4650000
OY776064.1	93	0.299333	0.192667	1.76631	1.30967	0.106667	63.5564	4650000	4700000
OY776064.1	94	0.261333	0.208667	1.30772	0.969636	0.0526667	31.381	4700000	4750000
OY776064.1	95	0.360667	0.374	1.06846	0.792234	-0.0133333	-7.94455	4750000	4800000
OY776064.1	96	0.513333	0.412	1.37014	1.01592	0.101333	60.3786	4800000	4850000
OY776064.1	97	0.397333	0.316667	2.70525	2.00587	0.0806667	48.0645	4850000	4900000
OY776064.1	98	0.378667	0.365333	2.2561	1.67283	0.0133333	7.94455	4900000	4950000
OY776064.1	99	0.556	0.461333	1.28042	0.949397	0.0946667	56.4063	4950000	5000000
OY776064.1	100	0.43	0.636	0.722802	0.535938	-0.206	-122.743	5000000	5050000
OY776064.1	101	0.27037	0.185926	1.35987	1.00831	0.0844444	50.3155	5050000	5100000
OY776064.1	102	0.304667	0.178	4.75438	3.52524	0.126667	75.4732	5100000	5150000
OY776064.1	103	0.182667	0.250667	0.735064	0.545029	-0.068	-40.5172	5150000	5200000
OY776064.1	104	0.186667	0.212667	0.902852	0.66944	-0.026	-15.4919	5200000	5250000
OY776064.1	105	0.206	0.186	1.03408	0.766741	0.02	11.9168	5250000	5300000
OY776064.1	106	0.234667	0.296667	0.745446	0.552728	-0.062	-36.9421	5300000	5350000
OY776064.1	107	0.784	0.57	1.44214	1.06931	0.214	127.51	5350000	5400000
OY776064.1	108	0.508667	0.586	0.995104	0.737842	-0.0773333	-46.0784	5400000	5450000
OY776064.1	109	0.291333	0.42	0.6422	0.476173	-0.128667	-76.6649	5450000	5500000
OY776064.1	110	0.168	0.165333	1.17876	0.874014	0.00266667	1.58891	5500000	5550000
OY776064.1	111	0.310667	0.221333	1.61253	1.19565	0.0893333	53.2285	5550000	5600000
OY776064.1	112	0.602	0.430667	1.39685	1.03573	0.171333	102.087	5600000	5650000
OY776064.1	113	0.389333	0.264667	1.44832	1.07389	0.124667	74.2815	5650000	5700000
OY776064.1	114	0.370667	0.224667	1.87583	1.39087	0.146	86.9928	5700000	5750000
OY776064.1	115	0.357333	0.19	2.0326	1.50712	0.167333	99.7041	5750000	5800000
OY776064.1	116	0.378667	0.446667	0.770615	0.571389	-0.068	-40.5172	5800000	5850000
OY776064.1	117	0.515333	0.608	0.804615	0.596599	-0.0926667	-55.2146	5850000	5900000
OY776064.1	118	0.641333	0.321333	2.61657	1.94011	0.32	190.669	5900000	5950000
OY776064.1	119	0.647333	0.324667	2.11443	1.56779	0.322667	192.258	5950000	6000000
OY776064.1	120	0.52	0.388667	1.38821	1.02932	0.131333	78.2538	6000000	6050000
OY776064.1	121	0.311333	0.24	2.02025	1.49796	0.0713333	42.5033	6050000	6100000
OY776064.1	122	0.482	0.513333	1.03694	0.768862	-0.0313333	-18.6697	6100000	6150000
OY776064.1	123	0.536	0.498667	1.16548	0.86417	0.0373333	22.2447	6150000	6200000
OY776064.1	124	0.347333	0.276	1.31859	0.977696	0.0713333	42.5033	6200000	6250000
OY776064.1	125	0.690667	0.5	1.65597	1.22786	0.190667	113.607	6250000	6300000
OY776064.1	126	0.44	0.319333	1.84554	1.36842	0.120667	71.8982	6300000	6350000
OY776064.1	127	0.448	0.371333	1.53825	1.14057	0.0766667	45.6811	6350000	6400000
OY776064.1	128	0.506	0.37	1.55787	1.15512	0.136	81.0344	6400000	6450000
OY776064.1	129	0.292667	0.275333	1.11432	0.826239	0.0173333	10.3279	6450000	6500000
OY776064.1	130	0.615333	0.286	2.55442	1.89403	0.329333	196.23	6500000	6550000
OY776064.1	131	0.268667	0.258667	1.17594	0.871929	0.01	5.95841	6550000	6600000
OY776064.1	132	0.232667	0.171333	1.83685	1.36198	0.0613333	36.5449	6600000	6650000
OY776064.1	133	0.576667	0.510667	1.51277	1.12167	0.066	39.3255	6650000	6700000
OY776064.1	134	0.274167	0.360833	0.537254	0.398359	-0.0866667	-51.6396	6700000	6750000
OY776064.1	135	0.874667	0.747333	1.28098	0.949808	0.127333	75.8704	6750000	6800000
OY776064.1	136	0.558667	0.708	0.875175	0.648918	-0.149333	-88.9789	6800000	6850000
OY776064.1	137	0.416667	0.218667	2.00935	1.48988	0.198	117.977	6850000	6900000
OY776064.1	138	0.548	0.380667	1.67306	1.24053	0.167333	99.7041	6900000	6950000
OY776064.1	139	0.775333	0.844667	0.901291	0.668282	-0.0693333	-41.3116	6950000	7000000
OY776064.1	140	0.598667	0.629333	0.947134	0.702273	-0.0306667	-18.2725	7000000	7050000
OY776064.1	141	0.669333	0.709333	0.90302	0.669564	-0.04	-23.8336	7050000	7100000
OY776064.1	142	0.507333	0.417333	1.37808	1.02181	0.09	53.6257	7100000	7150000
OY776064.1	143	0.478	0.414667	1.43488	1.06392	0.0633333	37.7366	7150000	7200000
OY776064.1	144	0.866667	0.802667	1.08586	0.805134	0.064	38.1338	7200000	7250000
OY776064.1	145	0.878667	0.726667	1.24122	0.920331	0.152	90.5678	7250000	7300000
OY776064.1	146	0.795333	0.750667	1.02851	0.762608	0.0446667	26.6142	7300000	7350000
OY776064.1	147	0.621333	0.585333	1.11986	0.830343	0.036	21.4503	7350000	7400000
OY776064.1	148	0.826	0.796	1.05914	0.78532	0.03	17.8752	7400000	7450000
OY776064.1	149	0.314667	0.269333	1.26698	0.939429	0.0453333	27.0115	7450000	7500000
OY776064.1	150	0.372	0.331333	1.19194	0.883787	0.0406667	24.2309	7500000	7550000
OY776064.1	151	0.357778	0.454074	1.05468	0.782015	-0.0962963	-57.3773	7550000	7595000
OY776065.1	0	0.296	0.302	1.11918	0.829838	-0.006	-3.57505	0	50000
OY776065.1	1	0.324	0.246	1.34898	1.00023	0.078	46.4756	50000	100000
OY776065.1	2	0.231852	0.140741	2.82653	2.09579	0.0911111	54.2877	100000	150000
OY776065.1	3	0.284	0.122	2.46934	1.83095	0.162	96.5263	150000	200000
OY776065.1	4	0.326667	0.46	0.734542	0.544643	-0.133333	-79.4455	200000	250000
OY776065.1	5	0.282	0.43	0.819462	0.607608	-0.148	-88.1845	250000	300000
OY776065.1	6	0.423333	0.314667	1.71823	1.27402	0.108667	64.7481	300000	350000
OY776065.1	7	0.440741	0.457037	0.979666	0.726395	-0.0162963	-9.71	350000	400000
OY776065.1	8	0.317333	0.336	1.61955	1.20085	-0.0186667	-11.1224	400000	450000
OY776065.1	9	0.35	0.552	0.642233	0.476198	-0.202	-120.36	450000	500000
OY776065.1	10	0.0681481	0.0881481	0.625541	0.463821	-0.02	-11.9168	500000	550000
OY776065.1	11	0.12	0.145333	0.603427	0.447424	-0.0253333	-15.0946	550000	600000
OY776065.1	12	0.232667	0.194	1.25768	0.932535	0.0386667	23.0392	600000	650000
OY776065.1	13	0.130833	0.130833	1.07271	0.795386	1.30104e-18	4.996e-16	650000	700000
OY776065.1	14	0.358667	0.388667	1.79214	1.32882	-0.03	-17.8752	700000	750000
OY776065.1	15	0.183333	0.156	1.93185	1.43241	0.0273333	16.2863	750000	800000
OY776065.1	16	0.503333	0.51	1.0652	0.789819	-0.00666667	-3.97227	800000	850000
OY776065.1	17	0.568667	0.534667	1.08084	0.801411	0.034	20.2586	850000	900000
OY776065.1	18	0.290667	0.276	1.43265	1.06227	0.0146667	8.739	900000	950000
OY776065.1	19	0.418	0.266	2.04143	1.51366	0.152	90.5678	950000	1000000
OY776065.1	20	0.421333	0.532	0.741557	0.549844	-0.110667	-65.9397	1000000	1050000
OY776065.1	21	0.392667	0.470667	0.934019	0.692549	-0.078	-46.4756	1050000	1100000
OY776065.1	22	0.266667	0.236	1.42885	1.05945	0.0306667	18.2725	1100000	1150000
OY776065.1	23	0.391333	0.442	0.905073	0.671086	-0.0506667	-30.1893	1150000	1200000
OY776065.1	24	0.348	0.444667	0.729882	0.541187	-0.0966667	-57.598	1200000	1250000
OY776065.1	25	0.396	0.453333	1.00907	0.748199	-0.0573333	-34.1616	1250000	1300000
OY776065.1	26	0.455556	0.525926	0.853955	0.633184	-0.0703704	-41.9296	1300000	1350000
OY776065.1	27	0.298	0.324667	0.93648	0.694374	-0.0266667	-15.8891	1350000	1400000
OY776065.1	28	0.612667	0.604	1.01134	0.749878	0.00866667	5.16396	1400000	1450000
OY776065.1	29	0.246667	0.264667	0.754909	0.559744	-0.018	-10.7251	1450000	1500000
OY776065.1	30	0.497333	0.362667	1.98244	1.46992	0.134667	80.2399	1500000	1550000
OY776065.1	31	0.624667	0.586667	1.04352	0.77374	0.038	22.642	1550000	1600000
OY776065.1	32	0.444667	0.507333	0.881701	0.653757	-0.0626667	-37.3394	1600000	1650000
OY776065.1	33	0.408667	0.470667	0.878164	0.651134	-0.062	-36.9421	1650000	1700000
OY776065.1	34	0.562	0.486667	1.44207	1.06925	0.0753333	44.8867	1700000	1750000
OY776065.1	35	0.33	0.427333	0.836506	0.620246	-0.0973333	-57.9952	1750000	1800000
OY776065.1	36	0.157037	0.112593	1.61267	1.19575	0.0444444	26.4818	1800000	1850000
OY776065.1	37	0.0866667	0.118333	3.06585	2.27324	-0.0316667	-18.8683	1850000	1900000
OY776065.1	38	0.473333	0.402667	1.39834	1.03683	0.0706667	42.1061	1900000	1950000
OY776065.1	39	0.13037	0.205926	0.700943	0.51973	-0.0755556	-45.0191	1950000	2000000
OY776065.1	40	0.157333	0.176667	0.899384	0.666868	-0.0193333	-11.5196	2000000	2050000
OY776065.1	41	0.188	0.192	0.999536	0.741128	-0.004	-2.38336	2050000	2100000
OY776065.1	42	0.245333	0.312667	0.826088	0.612521	-0.0673333	-40.12	2100000	2150000
OY776065.1	43	0.21	0.308667	0.680956	0.50491	-0.0986667	-58.7897	2150000	2200000
OY776065.1	44	0.402667	0.33	2.50909	1.86042	0.0726667	43.2978	2200000	2250000
OY776065.1	45	0.506	0.466	1.13738	0.843335	0.04	23.8336	2250000	2300000
OY776065.1	46	0.425333	0.61	0.723156	0.5362	-0.184667	-110.032	2300000	2350000
OY776065.1	47	0.44	0.466667	1.16834	0.86629	-0.0266667	-15.8891	2350000	2400000
OY776065.1	48	0.396667	0.456	0.966494	0.716628	-0.0593333	-35.3532	2400000	2450000
OY776065.1	49	0.324667	0.463333	0.747774	0.554454	-0.138667	-82.6233	2450000	2500000
OY776065.1	50	0.321333	0.384	0.872665	0.647057	-0.0626667	-37.3394	2500000	2550000
OY776065.1	51	0.592	0.691333	0.821738	0.609296	-0.0993333	-59.1869	2550000	2600000
OY776065.1	52	0.674667	0.844667	0.794091	0.588796	-0.17	-101.293	2600000	2650000
OY776065.1	53	0.483333	0.534667	1.01866	0.755311	-0.0513333	-30.5865	2650000	2700000
OY776065.1	54	0.175333	0.132667	1.73102	1.28351	0.0426667	25.4226	2700000	2750000
OY776065.1	55	0.327333	0.332	0.971928	0.720657	-0.00466667	-2.78059	2750000	2800000
OY776065.1	56	0.318	0.346	1.0426	0.773058	-0.028	-16.6836	2800000	2850000
OY776065.1	57	0.302667	0.232667	1.46306	1.08481	0.07	41.7089	2850000	2900000
OY776065.1	58	0.217333	0.196667	0.948579	0.703345	0.0206667	12.314	2900000	2950000
OY776065.1	59	0.350667	0.332	1.0599	0.785888	0.0186667	11.1224	2950000	3000000
OY776065.1	60	0.408	0.426667	1.05665	0.783478	-0.0186667	-11.1224	3000000	3050000
OY776065.1	61	0.564	0.567333	1.06678	0.790985	-0.00333333	-1.98614	3050000	3100000
OY776065.1	62	0.404	0.51	0.794936	0.589423	-0.106	-63.1592	3100000	3150000
OY776065.1	63	0.321333	0.410667	1.07233	0.795103	-0.0893333	-53.2285	3150000	3200000
OY776065.1	64	0.404	0.409333	1.26698	0.93943	-0.00533333	-3.17782	3200000	3250000
OY776065.1	65	0.500667	0.339333	1.6966	1.25798	0.161333	96.129	3250000	3300000
OY776065.1	66	0.658	0.706667	0.93144	0.690637	-0.0486667	-28.9976	3300000	3350000
OY776065.1	67	0.430667	0.484667	1.30243	0.965712	-0.054	-32.1754	3350000	3400000
OY776065.1	68	0.364	0.479333	0.736664	0.546216	-0.115333	-68.7203	3400000	3450000
OY776065.1	69	0.400667	0.612	0.656947	0.487108	-0.211333	-125.921	3450000	3500000
OY776065.1	70	0.433333	0.488667	0.889793	0.659756	-0.0553333	-32.9699	3500000	3550000
OY776065.1	71	0.469333	0.488	0.935544	0.69368	-0.0186667	-11.1224	3550000	3600000
OY776065.1	72	0.262667	0.374667	0.726731	0.538851	-0.112	-66.7342	3600000	3650000
OY776065.1	73	0.353333	0.394667	0.902602	0.669254	-0.0413333	-24.6281	3650000	3700000
OY776065.1	74	0.433333	0.290667	1.59614	1.1835	0.142667	85.0067	3700000	3750000
OY776065.1	75	0.513333	0.444	1.53552	1.13854	0.0693333	41.3116	3750000	3800000
OY776065.1	76	0.582667	0.657333	0.90018	0.667458	-0.0746667	-44.4895	3800000	3850000
OY776065.1	77	0.301333	0.367333	1.237	0.917204	-0.066	-39.3255	3850000	3900000
OY776065.1	78	0.37	0.663333	0.618402	0.458528	-0.293333	-174.78	3900000	3950000
OY776065.1	79	0.597333	0.512667	1.97983	1.46799	0.0846667	50.4479	3950000	4000000
OY776065.1	80	0.205333	0.260667	0.676769	0.501805	-0.0553333	-32.9699	4000000	4050000
OY776065.1	81	0.296	0.147333	4.5386	3.36525	0.148667	88.5817	4050000	4100000
OY776065.1	82	0.392667	0.303333	1.71496	1.27159	0.0893333	53.2285	4100000	4150000
OY776065.1	83	0.404667	0.461333	0.900078	0.667383	-0.0566667	-33.7643	4150000	4200000
OY776065.1	84	0.562	0.546667	1.00166	0.742704	0.0153333	9.13623	4200000	4250000
OY776065.1	85	0.566667	0.536667	1.14106	0.846067	0.03	17.8752	4250000	4300000
OY776065.1	86	0.632667	0.530667	1.21483	0.90076	0.102	60.7758	4300000	4350000
OY776065.1	87	0.538	0.655333	0.85335	0.632735	-0.117333	-69.912	4350000	4400000
OY776065.1	88	0.550667	0.609333	0.969282	0.718696	-0.0586667	-34.956	4400000	4450000
OY776065.1	89	0.34	0.374667	1.11167	0.824275	-0.0346667	-20.6558	4450000	4500000
OY776065.1	90	0.624	0.807333	0.803805	0.595999	-0.183333	-109.238	4500000	4550000
OY776065.1	91	0.0896296	0.0955556	0.235648	0.174727	-0.00592593	-3.53091	4550000	4600000
OY776065.1	92	0.345185	0.225926	1.48395	1.10031	0.119259	71.0596	4600000	4650000
OY776065.1	93	0.348667	0.488	1.13289	0.840006	-0.139333	-83.0205	4650000	4700000
OY776065.1	94	0.366	0.203333	2.76736	2.05192	0.162667	96.9235	4700000	4750000
OY776065.1	95	0.315333	0.438667	0.693458	0.51418	-0.123333	-73.4871	4750000	4800000
OY776065.1	96	0.385333	0.413333	1.59846	1.18522	-0.028	-16.6836	4800000	4850000
OY776065.1	97	0.405926	0.491111	0.907473	0.672866	-0.0851852	-50.7568	4850000	4900000
OY776065.1	98	0.432	0.428667	0.955773	0.708679	0.00333333	1.98614	4900000	4950000
OY776065.1	99	0.644667	0.498	1.46665	1.08748	0.146667	87.39	4950000	5000000
OY776065.1	100	0.42	0.468667	0.912725	0.67676	-0.0486667	-28.9976	5000000	5050000
OY776065.1	101	0.384	0.397333	1.08131	0.801757	-0.0133333	-7.94455	5050000	5100000
OY776065.1	102	0.462667	0.534	1.09111	0.809029	-0.0713333	-42.5033	5100000	5150000
OY776065.1	103	0.348667	0.386667	0.941339	0.697976	-0.038	-22.642	5150000	5200000
OY776065.1	104	0.538	0.657333	0.896554	0.66477	-0.119333	-71.1037	5200000	5250000
OY776065.1	105	0.75	0.898	0.829728	0.61522	-0.148	-88.1845	5250000	5300000
OY776065.1	106	0.245333	0.344667	0.834658	0.618876	-0.0993333	-59.1869	5300000	5350000
OY776065.1	107	0.123333	0.179333	1.03756	0.76932	-0.056	-33.3671	5350000	5400000
OY776065.1	108	0.34	0.404667	0.853028	0.632496	-0.0646667	-38.5311	5400000	5450000
OY776065.1	109	0.203333	0.168	1.23725	0.917386	0.0353333	21.0531	5450000	5500000
OY776065.1	110	0.335556	0.272593	1.45552	1.07923	0.062963	37.5159	5500000	5550000
OY776065.1	111	0.412	0.477333	0.990603	0.734504	-0.0653333	-38.9283	5550000	5600000
OY776065.1	112	0.589333	0.596	1.20461	0.893182	-0.00666667	-3.97227	5600000	5650000
OY776065.1	113	0.682	0.538667	1.37078	1.0164	0.143333	85.4039	5650000	5700000
OY776065.1	114	0.498	0.360667	2.16582	1.6059	0.137333	81.8288	5700000	5750000
OY776065.1	115	0.44	0.393333	1.14903	0.851972	0.0466667	27.8059	5750000	5800000
OY776065.1	116	0.459333	0.538667	0.935939	0.693972	-0.0793333	-47.2701	5800000	5850000
OY776065.1	117	0.378667	0.448667	1.13707	0.843103	-0.07	-41.7089	5850000	5900000
OY776065.1	118	0.340667	0.349333	0.977071	0.72447	-0.00866667	-5.16396	5900000	5950000
OY776065.1	119	0.291333	0.21	1.55528	1.1532	0.0813333	48.4617	5950000	6000000
OY776065.1	120	0.274	0.272	1.50016	1.11233	0.002	1.19168	6000000	6050000
OY776065.1	121	0.294	0.38	1.17407	0.870537	-0.086	-51.2423	6050000	6100000
OY776065.1	122	0.499333	0.468667	1.10292	0.817784	0.0306667	18.2725	6100000	6150000
OY776065.1	123	0.260667	0.392667	0.698678	0.51805	-0.132	-78.651	6150000	6200000
OY776065.1	124	0.301333	0.346	1.01418	0.751989	-0.0446667	-26.6142	6200000	6250000
OY776065.1	125	0.157037	0.225185	0.715941	0.53085	-0.0681481	-40.6055	6250000	6300000
OY776065.1	126	0.365333	0.401333	0.914195	0.67785	-0.036	-21.4503	6300000	6350000
OY776065.1	127	0.19	0.272	0.702585	0.520947	-0.082	-48.859	6350000	6400000
OY776065.1	128	0.193333	0.0866667	5.07182	3.76061	0.106667	63.5564	6400000	6445000
OY776065.1	129	0.112381	0.0847619	1.7821	1.32138	0.027619	16.4566	6455000	6495000
OY776065.1	130	0.0766667	0.0608333	0.949858	0.704293	0.0158333	9.43415	6500000	6550000
OY776065.1	131	0.179333	0.268667	0.771885	0.572331	-0.0893333	-53.2285	6550000	6600000
OY776065.1	132	0.225333	0.352	0.731113	0.5421	-0.126667	-75.4732	6600000	6650000
OY776065.1	133	0.261333	0.368667	0.698901	0.518216	-0.107333	-63.9536	6650000	6700000
OY776065.1	134	0.262667	0.449333	0.608365	0.451086	-0.186667	-111.224	6700000	6750000
OY776065.1	135	0.219259	0.301481	2.22144	1.64714	-0.0822222	-48.9914	6750000	6800000
OY776065.1	136	0.195	0.155	3.53065	2.61788	0.04	23.8336	6800000	6845000
OY776065.1	137	0.215556	0.264444	4.19384	3.10962	-0.0488889	-29.13	6855000	6900000
OY776065.1	138	0.247333	0.418667	0.608627	0.45128	-0.171333	-102.087	6900000	6950000
OY776065.1	139	0.248667	0.518	0.501058	0.37152	-0.269333	-160.48	6950000	7000000
OY776065.1	140	0.318667	0.455333	0.697073	0.51686	-0.136667	-81.4316	7000000	7050000
OY776065.1	141	0.138667	0.248667	0.566809	0.420273	-0.11	-65.5425	7050000	7100000
OY776065.1	142	0.0833333	0.131333	0.655495	0.486032	-0.048	-28.6004	7100000	7150000
OY776065.1	143	0.152667	0.235333	0.57625	0.427274	-0.0826667	-49.2562	7150000	7200000
OY776065.1	144	0.395333	0.335333	1.37393	1.01873	0.06	35.7505	7200000	7250000
OY776065.1	145	0.344667	0.402	0.891781	0.661231	-0.0573333	-34.1616	7250000	7300000
OY776065.1	146	0.26	0.206	1.43072	1.06084	0.054	32.1754	7300000	7350000
OY776065.1	147	0.118519	0.139259	1.86631	1.38382	-0.0207407	-12.3582	7350000	7400000
OY776065.1	148	0.0986667	0.094	0.984607	0.730058	0.00466667	2.78059	7400000	7450000
OY776065.1	149	0.217037	0.180741	4.61954	3.42526	0.0362963	21.6268	7450000	7500000
OY776065.1	150	0.352	0.184	5.00692	3.71249	0.168	100.101	7500000	7550000
OY776065.1	151	0.538333	0.344167	2.37876	1.76378	0.194167	115.692	7550000	7590000
OY776066.1	0	0.0893333	0.0586667	1.55438	1.15253	0.0306667	18.2725	0	50000
OY776066.1	1	0.0666667	0.065	1.13702	0.843067	0.00166667	0.993068	50000	100000
OY776066.1	2	0.161333	0.237333	1.25617	0.931417	-0.076	-45.2839	100000	150000
OY776066.1	3	0.316	0.408	0.758306	0.562263	-0.092	-54.8174	150000	200000
OY776066.1	4	0.259333	0.202	1.29453	0.959855	0.0573333	34.1616	200000	250000
OY776066.1	5	0.309333	0.257333	1.397	1.03583	0.052	30.9837	250000	300000
OY776066.1	6	0.22	0.223333	1.04239	0.772904	-0.00333333	-1.98614	300000	350000
OY776066.1	7	0.270667	0.341333	0.81499	0.604292	-0.0706667	-42.1061	350000	400000
OY776066.1	8	0.266	0.201333	1.40196	1.03951	0.0646667	38.5311	400000	450000
OY776066.1	9	0.327333	0.290667	1.39317	1.03299	0.0366667	21.8475	450000	500000
OY776066.1	10	0.370667	0.344667	1.13794	0.84375	0.026	15.4919	500000	550000
OY776066.1	11	0.488	0.464	1.09936	0.815148	0.024	14.3002	550000	600000
OY776066.1	12	0.399333	0.415333	0.984176	0.729739	-0.016	-9.53346	600000	650000
OY776066.1	13	0.453333	0.432	1.09522	0.812076	0.0213333	12.7113	650000	700000
OY776066.1	14	0.338667	0.334667	1.07681	0.798424	0.004	2.38336	700000	750000
OY776066.1	15	0.311852	0.348148	0.884257	0.655652	-0.0362963	-21.6268	755000	800000
OY776066.1	16	0.153333	0.198	5.88183	4.36121	-0.0446667	-26.6142	800000	850000
OY776066.1	17	0.312222	0.166667	1.46964	1.08969	0.145556	86.728	850000	900000
OY776066.1	18	0.546667	0.498	1.09919	0.81502	0.0486667	28.9976	900000	950000
OY776066.1	19	0.385333	0.358667	1.49382	1.10763	0.0266667	15.8891	950000	1000000
OY776066.1	20	0.0593333	0.054	1.6198	1.20103	0.00533333	3.17782	1000000	1050000
OY776066.1	21	0.371333	0.294	4.0279	2.98657	0.0773333	46.0784	1050000	1100000
OY776066.1	22	0.496667	0.318667	4.2621	3.16023	0.178	106.06	1100000	1150000
OY776066.1	23	0.31	0.416667	0.786795	0.583387	-0.106667	-63.5564	1150000	1200000
OY776066.1	24	0.536	0.507333	1.26341	0.93678	0.0286667	17.0808	1200000	1250000
OY776066.1	25	0.564	0.687333	0.851669	0.631489	-0.123333	-73.4871	1250000	1300000
OY776066.1	26	0.405333	0.319333	1.67735	1.24371	0.086	51.2423	1300000	1350000
OY776066.1	27	0.294	0.382	0.789572	0.585446	-0.088	-52.434	1350000	1400000
OY776066.1	28	0.228	0.378667	0.595856	0.441811	-0.150667	-89.7734	1400000	1450000
OY776066.1	29	0.438667	0.464	0.977705	0.724941	-0.0253333	-15.0946	1450000	1500000
OY776066.1	30	0.251333	0.376667	0.680912	0.504877	-0.125333	-74.6787	1500000	1550000
OY776066.1	31	0.306667	0.225926	1.66915	1.23763	0.0807407	48.1087	1550000	1600000
OY776066.1	32	0.456	0.462	1.13292	0.840026	-0.006	-3.57505	1600000	1650000
OY776066.1	33	0.369333	0.281333	1.38061	1.02369	0.088	52.434	1650000	1700000
OY776066.1	34	0.302667	0.418667	0.7284	0.540088	-0.116	-69.1176	1700000	1750000
OY776066.1	35	0.428667	0.409333	1.14136	0.846285	0.0193333	11.5196	1750000	1800000
OY776066.1	36	0.360667	0.297333	1.16209	0.86166	0.0633333	37.7366	1800000	1850000
OY776066.1	37	0.103333	0.142667	0.797485	0.591313	-0.0393333	-23.4364	1850000	1900000
OY776066.1	38	0.188	0.210667	1.51035	1.11988	-0.0226667	-13.5057	1900000	1950000
OY776066.1	39	0.278667	0.202	1.40568	1.04228	0.0766667	45.6811	1950000	2000000
OY776066.1	40	0.210667	0.232667	0.942591	0.698905	-0.022	-13.1085	2000000	2050000
OY776066.1	41	0.0993333	0.105333	0.828637	0.614411	-0.006	-3.57505	2050000	2100000
OY776066.1	42	0.0952381	0.110476	0.808143	0.599216	-0.0152381	-9.07948	2100000	2150000
OY776066.1	43	0.0925926	0.119259	0.647185	0.479869	-0.0266667	-15.8891	2150000	2195000
OY776066.1	44	0.163333	0.186	0.89194	0.661349	-0.0226667	-13.5057	2200000	2250000
OY776066.1	45	0.064	0.0533333	1.71904	1.27462	0.0106667	6.35564	2250000	2300000
OY776066.1	46	0.191429	0.211429	1.03087	0.764361	-0.02	-11.9168	2300000	2350000
OY776066.1	47	0.107333	0.138	1.02863	0.762703	-0.0306667	-18.2725	2350000	2400000
OY776066.1	48	0.182667	0.185333	1.0838	0.803605	-0.00266667	-1.58891	2400000	2450000
OY776066.1	49	0.137333	0.139333	1.04822	0.777224	-0.002	-1.19168	2450000	2500000
OY776066.1	50	0.159333	0.164667	0.795589	0.589907	-0.00533333	-3.17782	2500000	2550000
OY776066.1	51	0.0851852	0.0666667	0.984975	0.730331	0.0185185	11.0341	2550000	2595000
OY776066.1	52	0.104	0.124	0.867245	0.643038	-0.02	-11.9168	2600000	2650000
OY776066.1	53	0.0793333	0.0793333	1.28242	0.950877	8.65668e-20	-1.77722e-16	2650000	2700000
OY776066.1	54	0.111333	0.144667	0.911543	0.675883	-0.0333333	-19.8614	2700000	2750000
OY776066.1	55	0.0746667	0.086	0.5383	0.399134	-0.0113333	-6.75287	2750000	2800000
OY776066.1	56	0.143333	0.167333	0.871864	0.646463	-0.024	-14.3002	2800000	2850000
OY776066.1	57	0.198333	0.169167	1.21147	0.898268	0.0291667	17.3787	2850000	2890000
OY776066.1	58	0.246667	0.292667	0.789614	0.585476	-0.046	-27.4087	2900000	2950000
OY776066.1	59	0.0833333	0.109333	0.812614	0.602531	-0.026	-15.4919	2950000	3000000
OY776066.1	60	0.146667	0.205333	1.0007	0.741989	-0.0586667	-34.956	3000000	3050000
OY776066.1	61	0.2	0.251333	0.89737	0.665375	-0.0513333	-30.5865	3050000	3100000
OY776066.1	62	0.474667	0.539333	1.00848	0.747756	-0.0646667	-38.5311	3100000	3150000
OY776066.1	63	0.616	0.494	1.37395	1.01875	0.122	72.6926	3150000	3200000
OY776066.1	64	0.251333	0.22	1.51968	1.1268	0.0313333	18.6697	3200000	3250000
OY776066.1	65	0.47	0.412667	1.0555	0.782622	0.0573333	34.1616	3250000	3300000
OY776066.1	66	0.764	0.716	1.10974	0.822845	0.048	28.6004	3300000	3350000
OY776066.1	67	0.375333	0.366	0.887244	0.657866	0.00933333	5.56118	3350000	3400000
OY776066.1	68	0.395333	0.418	0.968518	0.718129	-0.0226667	-13.5057	3400000	3450000
OY776066.1	69	0.465333	0.442667	1.08569	0.80501	0.0226667	13.5057	3450000	3500000
OY776066.1	70	0.263333	0.404	0.720609	0.534312	-0.140667	-83.815	3500000	3550000
OY776066.1	71	0.289333	0.278667	1.19595	0.886763	0.0106667	6.35564	3550000	3600000
OY776066.1	72	0.462667	0.402	6.32479	4.68965	0.0606667	36.1477	3600000	3650000
OY776066.1	73	0.332593	0.285185	2.84369	2.10851	0.0474074	28.2473	3655000	3700000
OY776066.1	74	0.252	0.400667	0.644239	0.477685	-0.148667	-88.5817	3700000	3750000
OY776066.1	75	0.256667	0.308667	0.838924	0.622039	-0.052	-30.9837	3750000	3800000
OY776066.1	76	0.229333	0.473333	0.477163	0.353803	-0.244	-145.385	3800000	3850000
OY776066.1	77	0.446	0.469333	0.919234	0.681587	-0.0233333	-13.903	3850000	3900000
OY776066.1	78	0.0906667	0.111333	0.809161	0.599971	-0.0206667	-12.314	3900000	3950000
OY776066.1	79	0.0826667	0.124	0.791758	0.587066	-0.0413333	-24.6281	3950000	4000000
OY776066.1	80	0.210667	0.325333	0.606282	0.449541	-0.114667	-68.3231	4000000	4050000
OY776066.1	81	0.114667	0.0913333	1.08967	0.807962	0.0233333	13.903	4050000	4100000
OY776066.1	82	0.104	0.0993333	1.71558	1.27206	0.00466667	2.78059	4100000	4150000
OY776066.1	83	0.168667	0.178667	1.1455	0.849358	-0.01	-5.95841	4150000	4200000
OY776066.1	84	0.318667	0.280667	1.15529	0.856615	0.038	22.642	4200000	4250000
OY776066.1	85	0.39	0.246	1.94134	1.43945	0.144	85.8011	4250000	4300000
OY776066.1	86	0.503333	0.469333	1.39941	1.03763	0.034	20.2586	4300000	4350000
OY776066.1	87	0.328667	0.158	2.86287	2.12274	0.170667	101.69	4350000	4400000
OY776066.1	88	0.393333	0.358667	1.18731	0.880356	0.0346667	20.6558	4400000	4450000
OY776066.1	89	0.602667	0.328667	2.6976	2.0002	0.274	163.26	4450000	4500000
OY776066.1	90	0.322	0.294	1.12937	0.837397	0.028	16.6836	4500000	4550000
OY776066.1	91	0.291333	0.254	1.14941	0.852253	0.0373333	22.2447	4550000	4600000
OY776066.1	92	0.107333	0.216667	0.417856	0.309829	-0.109333	-65.1453	4600000	4650000
OY776066.1	93	0.53	0.591333	0.899746	0.667136	-0.0613333	-36.5449	4650000	4700000
OY776066.1	94	0.248	0.278	0.863219	0.640053	-0.03	-17.8752	4700000	4750000
OY776066.1	95	0.611333	0.432	1.47566	1.09416	0.179333	106.854	4750000	4800000
OY776066.1	96	0.566667	0.412667	1.56508	1.16046	0.154	91.7595	4800000	4850000
OY776066.1	97	0.507407	0.494074	2.24776	1.66665	0.0133333	7.94455	4850000	4900000
OY776066.1	98	0.347333	0.286	1.18711	0.880211	0.0613333	36.5449	4900000	4950000
OY776066.1	99	0.170667	0.246667	0.690749	0.512171	-0.076	-45.2839	4950000	5000000
OY776066.1	100	0.213333	0.196667	1.32427	0.981906	0.0166667	9.93068	5000000	5050000
OY776066.1	101	0.139333	0.107333	1.71869	1.27436	0.032	19.0669	5050000	5100000
OY776066.1	102	0.223333	0.126667	1.83643	1.36166	0.0966667	57.598	5100000	5150000
OY776066.1	103	0.486667	0.371333	1.86484	1.38273	0.115333	68.7203	5150000	5200000
OY776066.1	104	0.316667	0.292667	1.08792	0.806665	0.024	14.3002	5200000	5250000
OY776066.1	105	0.241333	0.160667	1.88357	1.39662	0.0806667	48.0645	5250000	5300000
OY776066.1	106	0.238667	0.138667	1.87726	1.39194	0.1	59.5841	5300000	5350000
OY776066.1	107	0.130667	0.084	1.74613	1.29471	0.0466667	27.8059	5350000	5400000
OY776066.1	108	0.068	0.179333	0.650218	0.482119	-0.111333	-66.337	5400000	5450000
OY776066.1	109	0.0646667	0.143333	0.888762	0.658992	-0.0786667	-46.8728	5450000	5500000
OY776066.1	110	0.295333	0.222667	1.34516	0.997397	0.0726667	43.2978	5500000	5550000
OY776066.1	111	0.376	0.360667	1.12829	0.836598	0.0153333	9.13623	5550000	5600000
OY776066.1	112	0.514667	0.422667	1.24382	0.922256	0.092	54.8174	5600000	5650000
OY776066.1	113	0.384667	0.334667	1.29886	0.963071	0.05	29.7921	5650000	5700000
OY776066.1	114	0.309333	0.333333	1.01742	0.754391	-0.024	-14.3002	5700000	5750000
OY776066.1	115	0.476	0.522667	0.873381	0.647587	-0.0466667	-27.8059	5750000	5800000
OY776066.1	116	0.466	0.482667	1.03828	0.769859	-0.0166667	-9.93068	5800000	5850000
OY776066.1	117	0.602667	0.52	1.1622	0.861739	0.0826667	49.2562	5850000	5900000
OY776066.1	118	0.438	0.367333	1.99216	1.47713	0.0706667	42.1061	5900000	5950000
OY776066.1	119	0.529333	0.432	1.36801	1.01434	0.0973333	57.9952	5950000	6000000
OY776066.1	120	0.367333	0.378	0.974066	0.722243	-0.0106667	-6.35564	6000000	6050000
OY776066.1	121	0.51	0.455333	1.10938	0.822572	0.0546667	32.5726	6050000	6100000
OY776066.1	122	0.577333	0.482	1.97476	1.46423	0.0953333	56.8035	6100000	6150000
OY776066.1	123	0.518	0.476667	1.36878	1.01491	0.0413333	24.6281	6150000	6200000
OY776066.1	124	0.483704	0.454815	1.10915	0.822401	0.0288889	17.2132	6205000	6250000
OY776066.1	125	0.464667	0.38	1.21856	0.903531	0.0846667	50.4479	6250000	6300000
OY776066.1	126	0.667333	0.61	1.14573	0.849524	0.0573333	34.1616	6300000	6350000
OY776066.1	127	0.576667	0.525333	1.11367	0.825758	0.0513333	30.5865	6350000	6400000
OY776066.1	128	0.362667	0.361333	1.15924	0.859547	0.00133333	0.794455	6400000	6450000
OY776066.1	129	0.296	0.276	1.06159	0.787138	0.02	11.9168	6450000	6500000
OY776066.1	130	0.41	0.28	2.19702	1.62903	0.13	77.4593	6500000	6550000
OY776066.1	131	0.474667	0.396667	1.21186	0.898562	0.078	46.4756	6550000	6600000
OY776066.1	132	0.403333	0.300667	1.40448	1.04138	0.102667	61.173	6600000	6650000
OY776066.1	133	0.428667	0.345333	1.19598	0.886788	0.0833333	49.6534	6650000	6700000
OY776066.1	134	0.326	0.246	1.32481	0.982311	0.08	47.6673	6700000	6750000
OY776066.1	135	0.567333	0.542	1.06361	0.788634	0.0253333	15.0946	6750000	6800000
OY776066.1	136	0.497778	0.395556	1.31943	0.978318	0.102222	60.9082	6800000	6850000
OY776066.1	137	0.665333	0.547333	1.26473	0.93776	0.118	70.3092	6850000	6900000
OY776066.1	138	0.409333	0.376667	1.11641	0.827789	0.0326667	19.4641	6900000	6950000
OY776066.1	139	0.507333	0.516667	1.00017	0.741599	-0.00933333	-5.56118	6950000	7000000
OY776066.1	140	0.580667	0.603333	1.00072	0.742008	-0.0226667	-13.5057	7000000	7050000
OY776066.1	141	0.482222	0.462963	1.21684	0.902251	0.0192593	11.4755	7050000	7100000
OY776066.1	142	0.444667	0.375333	1.74569	1.29438	0.0693333	41.3116	7100000	7150000
OY776066.1	143	0.555333	0.571333	0.983183	0.729003	-0.016	-9.53346	7150000	7200000
OY776066.1	144	0.491333	0.503333	0.983739	0.729415	-0.012	-7.15009	7200000	7250000
OY776066.1	145	0.601333	0.55	1.13944	0.844862	0.0513333	30.5865	7250000	7300000
OY776066.1	146	0.485333	0.419333	1.09771	0.81392	0.066	39.3255	7300000	7350000
OY776066.1	147	0.07	0.103333	0.668067	0.495353	-0.0333333	-19.8614	7350000	7360000
OY776067.1	0	0.0758333	0.0733333	1.88033	1.39421	0.0025	1.4896	0	50000
OY776067.1	1	0.0686667	0.04	1.7375	1.28831	0.0286667	17.0808	50000	100000
OY776067.1	2	0.251333	0.208	1.50708	1.11746	0.0433333	25.8198	100000	150000
OY776067.1	3	0.408	0.384667	1.16267	0.862087	0.0233333	13.903	150000	200000
OY776067.1	4	0.284667	0.234	1.68243	1.24748	0.0506667	30.1893	200000	250000
OY776067.1	5	0.387333	0.356667	1.16433	0.863319	0.0306667	18.2725	250000	300000
OY776067.1	6	0.293333	0.264	1.15343	0.855238	0.0293333	17.478	300000	350000
OY776067.1	7	0.176	0.165333	1.27591	0.946053	0.0106667	6.35564	350000	400000
OY776067.1	8	0.0646667	0.152	0.511262	0.379086	-0.0873333	-52.0368	400000	450000
OY776067.1	9	0.397333	0.422667	0.877606	0.65072	-0.0253333	-15.0946	450000	500000
OY776067.1	10	0.466667	0.422667	1.18968	0.882115	0.044	26.217	500000	550000
OY776067.1	11	0.258	0.408667	0.775239	0.574818	-0.150667	-89.7734	550000	600000
OY776067.1	12	0.161333	0.382667	1.24647	0.924226	-0.221333	-131.879	600000	650000
OY776067.1	13	0.591852	0.501481	1.91065	1.41669	0.0903704	53.8464	650000	700000
OY776067.1	14	0.514	0.530667	0.9645	0.71515	-0.0166667	-9.93068	700000	750000
OY776067.1	15	0.706667	0.655833	1.07308	0.795662	0.0508333	30.2886	750000	795000
OY776067.1	16	0.438	0.418667	1.041	0.771876	0.0193333	11.5196	800000	850000
OY776067.1	17	0.300741	0.231852	1.25782	0.93264	0.0688889	41.0468	850000	900000
OY776067.1	18	0.518	0.541333	1.35965	1.00814	-0.0233333	-13.903	900000	950000
OY776067.1	19	0.533333	0.587407	0.923324	0.684619	-0.0540741	-32.2196	950000	1000000
OY776067.1	20	0.493333	0.440667	5.82073	4.31591	0.0526667	31.381	1000000	1050000
OY776067.1	21	0.467333	0.476667	0.940702	0.697504	-0.00933333	-5.56118	1050000	1100000
OY776067.1	22	0.562	0.523333	1.03141	0.764761	0.0386667	23.0392	1100000	1150000
OY776067.1	23	0.335333	0.297333	1.26008	0.934315	0.038	22.642	1150000	1200000
OY776067.1	24	0.423333	0.326667	1.30016	0.96403	0.0966667	57.598	1200000	1250000
OY776067.1	25	0.671333	0.460667	1.39925	1.0375	0.210667	125.524	1250000	1300000
OY776067.1	26	0.310667	0.354	0.83056	0.615837	-0.0433333	-25.8198	1300000	1350000
OY776067.1	27	0.26	0.269333	0.975757	0.723497	-0.00933333	-5.56118	1350000	1400000
OY776067.1	28	0.548667	0.576667	0.954795	0.707954	-0.028	-16.6836	1400000	1450000
OY776067.1	29	0.394667	0.378	2.6037	1.93057	0.0166667	9.93068	1450000	1500000
OY776067.1	30	0.351333	0.445333	0.847175	0.628156	-0.094	-56.0091	1500000	1550000
OY776067.1	31	0.322667	0.317333	1.21291	0.899342	0.00533333	3.17782	1550000	1600000
OY776067.1	32	0.310667	0.317333	1.13572	0.842101	-0.00666667	-3.97227	1600000	1650000
OY776067.1	33	0.268148	0.228889	1.03123	0.764631	0.0392593	23.3923	1650000	1700000
OY776067.1	34	0.257333	0.222	1.3225	0.980593	0.0353333	21.0531	1700000	1750000
OY776067.1	35	0.147333	0.154	0.993434	0.736604	-0.00666667	-3.97227	1750000	1800000
OY776067.1	36	0.428667	0.331333	1.41411	1.04852	0.0973333	57.9952	1800000	1850000
OY776067.1	37	0.338667	0.326	1.07016	0.793491	0.0126667	7.54732	1850000	1900000
OY776067.1	38	0.392667	0.232	2.18154	1.61755	0.160667	95.7318	1900000	1950000
OY776067.1	39	0.4	0.450667	0.764616	0.566941	-0.0506667	-30.1893	1950000	2000000
OY776067.1	40	0.432	0.544	0.843259	0.625253	-0.112	-66.7342	2000000	2050000
OY776067.1	41	0.275333	0.208667	1.57159	1.16529	0.0666667	39.7227	2050000	2100000
OY776067.1	42	0.288667	0.298667	1.05879	0.785065	-0.01	-5.95841	2100000	2150000
OY776067.1	43	0.275333	0.262	1.05151	0.779662	0.0133333	7.94455	2150000	2200000
OY776067.1	44	0.286	0.182	1.6975	1.25865	0.104	61.9675	2200000	2250000
OY776067.1	45	0.166667	0.107333	2.31031	1.71303	0.0593333	35.3532	2250000	2300000
OY776067.1	46	0.250667	0.267333	1.35954	1.00806	-0.0166667	-9.93068	2300000	2350000
OY776067.1	47	0.474	0.349333	1.5876	1.17716	0.124667	74.2815	2350000	2400000
OY776067.1	48	0.368	0.315333	1.15606	0.857184	0.0526667	31.381	2400000	2450000
OY776067.1	49	0.176667	0.125333	1.58193	1.17296	0.0513333	30.5865	2450000	2500000
OY776067.1	50	0.179259	0.146667	1.36181	1.00975	0.0325926	19.42	2500000	2550000
OY776067.1	51	0.211111	0.181481	5.11593	3.79332	0.0296296	17.6546	2555000	2600000
OY776067.1	52	0.434	0.394	1.34355	0.996206	0.04	23.8336	2600000	2650000
OY776067.1	53	0.326	0.286	1.13897	0.844513	0.04	23.8336	2650000	2700000
OY776067.1	54	0.238	0.298	0.900309	0.667554	-0.06	-35.7505	2700000	2750000
OY776067.1	55	0.442	0.342	1.29347	0.95907	0.1	59.5841	2750000	2800000
OY776067.1	56	0.545185	0.380741	1.50149	1.11331	0.164444	97.9828	2800000	2850000
OY776067.1	57	0.318	0.404	0.917597	0.680373	-0.086	-51.2423	2850000	2900000
OY776067.1	58	0.218	0.272	0.933216	0.691954	-0.054	-32.1754	2900000	2950000
OY776067.1	59	0.210667	0.299333	0.723919	0.536765	-0.0886667	-52.8312	2950000	3000000
OY776067.1	60	0.0806667	0.132667	0.621418	0.460764	-0.052	-30.9837	3000000	3050000
OY776067.1	61	0.0562963	0.0785185	0.355087	0.263287	-0.0222222	-13.2409	3050000	3100000
OY776067.1	62	0.08	0.0993333	0.68764	0.509866	-0.0193333	-11.5196	3100000	3150000
OY776067.1	63	0.265333	0.350667	0.718447	0.532708	-0.0853333	-50.8451	3150000	3200000
OY776067.1	64	0.254667	0.254667	0.929	0.688828	7.63251e-18	5.02896e-15	3200000	3250000
OY776067.1	65	0.296667	0.416	0.853194	0.63262	-0.119333	-71.1037	3250000	3300000
OY776067.1	66	0.128	0.282	0.506195	0.375329	-0.154	-91.7595	3300000	3350000
OY776067.1	67	0.202667	0.364	0.693622	0.514301	-0.161333	-96.129	3350000	3400000
OY776067.1	68	0.0766667	0.121333	0.63649	0.471939	-0.0446667	-26.6142	3400000	3450000
OY776067.1	69	0.11	0.111333	0.951581	0.705571	-0.00133333	-0.794455	3450000	3500000
OY776067.1	70	0.184667	0.189333	1.04365	0.773838	-0.00466667	-2.78059	3500000	3550000
OY776067.1	71	0.178	0.158	1.22929	0.911484	0.02	11.9168	3550000	3600000
OY776067.1	72	0.190667	0.18	1.1241	0.833488	0.0106667	6.35564	3600000	3650000
OY776067.1	73	0.271333	0.27	1.07012	0.793461	0.00133333	0.794455	3650000	3700000
OY776067.1	74	0.330667	0.299333	1.37605	1.0203	0.0313333	18.6697	3700000	3750000
OY776067.1	75	0.142	0.110667	2.90239	2.15204	0.0313333	18.6697	3750000	3800000
OY776067.1	76	0.242	0.219333	1.10977	0.822865	0.0226667	13.5057	3800000	3850000
OY776067.1	77	0.152667	0.141333	1.23956	0.919101	0.0113333	6.75287	3850000	3900000
OY776067.1	78	0.14	0.129333	1.19441	0.885621	0.0106667	6.35564	3900000	3950000
OY776067.1	79	0.226	0.207333	1.12894	0.837074	0.0186667	11.1224	3950000	4000000
OY776067.1	80	0.172593	0.16	1.16719	0.865436	0.0125926	7.50318	4000000	4050000
OY776067.1	81	0.294	0.330667	1.46315	1.08489	-0.0366667	-21.8475	4050000	4100000
OY776067.1	82	0.47	0.592667	1.04458	0.774528	-0.122667	-73.0898	4100000	4150000
OY776067.1	83	0.230667	0.306	0.795937	0.590165	-0.0753333	-44.8867	4150000	4200000
OY776067.1	84	0.146667	0.210667	0.668654	0.495788	-0.064	-38.1338	4200000	4250000
OY776067.1	85	0.290667	0.236	1.22996	0.911983	0.0546667	32.5726	4250000	4300000
OY776067.1	86	0.236667	0.178667	1.45968	1.08231	0.058	34.5588	4300000	4350000
OY776067.1	87	0.448667	0.511333	0.91519	0.678588	-0.0626667	-37.3394	4350000	4400000
OY776067.1	88	0.256	0.462	0.753535	0.558725	-0.206	-122.743	4400000	4450000
OY776067.1	89	0.236667	0.33	0.763141	0.565848	-0.0933333	-55.6118	4450000	4500000
OY776067.1	90	0.292667	0.269333	1.0722	0.79501	0.0233333	13.903	4500000	4550000
OY776067.1	91	0.366	0.418	1.1438	0.848097	-0.052	-30.9837	4550000	4600000
OY776067.1	92	0.115333	0.155333	0.83446	0.618728	-0.04	-23.8336	4600000	4650000
OY776067.1	93	0.173333	0.202222	1.22839	0.910817	-0.0288889	-17.2132	4650000	4700000
OY776067.1	94	0.416	0.382667	1.11751	0.8286	0.0333333	19.8614	4700000	4750000
OY776067.1	95	0.276667	0.407333	0.760572	0.563943	-0.130667	-77.8566	4750000	4800000
OY776067.1	96	0.570667	0.574667	1.17962	0.874653	-0.004	-2.38336	4800000	4850000
OY776067.1	97	0.341333	0.341333	1.11656	0.827895	-9.71716e-18	-3.9066e-15	4850000	4900000
OY776067.1	98	0.235333	0.213333	1.11586	0.827375	0.022	13.1085	4900000	4950000
OY776067.1	99	0.256667	0.21	1.3024	0.96569	0.0466667	27.8059	4950000	5000000
OY776067.1	100	0.307333	0.316667	1.07976	0.800613	-0.00933333	-5.56118	5000000	5050000
OY776067.1	101	0.348	0.548	0.671657	0.498015	-0.2	-119.168	5050000	5100000
OY776067.1	102	0.401333	0.422667	1.13341	0.840388	-0.0213333	-12.7113	5100000	5150000
OY776067.1	103	0.122667	0.28	0.563218	0.417611	-0.157333	-93.7457	5150000	5200000
OY776067.1	104	0.294	0.280667	3.80085	2.81823	0.0133333	7.94455	5200000	5250000
OY776067.1	105	0.23	0.235333	1.15391	0.855592	-0.00533333	-3.17782	5250000	5300000
OY776067.1	106	0.346667	0.315333	1.2249	0.908228	0.0313333	18.6697	5300000	5350000
OY776067.1	107	0.299333	0.352	1.03884	0.770273	-0.0526667	-31.381	5350000	5400000
OY776067.1	108	0.142963	0.18963	0.921194	0.68304	-0.0466667	-27.8059	5400000	5450000
OY776067.1	109	0.352667	0.390667	0.929197	0.688973	-0.038	-22.642	5450000	5500000
OY776067.1	110	0.187333	0.12	1.69843	1.25934	0.0673333	40.12	5500000	5550000
OY776067.1	111	0.14	0.156667	0.648361	0.480742	-0.0166667	-9.93068	5550000	5600000
OY776067.1	112	0.298667	0.328	0.968776	0.71832	-0.0293333	-17.478	5600000	5650000
OY776067.1	113	0.4575	0.4925	0.740719	0.549222	-0.035	-20.8544	5650000	5700000
OY776067.1	114	0.175333	0.241333	0.831013	0.616173	-0.066	-39.3255	5700000	5750000
OY776067.1	115	0.532667	0.412667	1.27217	0.943281	0.12	71.5009	5750000	5800000
OY776067.1	116	0.440667	0.428	1.04003	0.771155	0.0126667	7.54732	5800000	5850000
OY776067.1	117	0.399333	0.407333	0.976754	0.724236	-0.008	-4.76673	5850000	5900000
OY776067.1	118	0.132667	0.231333	0.640851	0.475173	-0.0986667	-58.7897	5900000	5950000
OY776067.1	119	0.524667	0.507333	1.03778	0.769482	0.0173333	10.3279	5950000	6000000
OY776067.1	120	0.336667	0.448	0.79371	0.588513	-0.111333	-66.337	6000000	6050000
OY776067.1	121	0.30963	0.325926	0.906191	0.671915	-0.0162963	-9.71	6050000	6100000
OY776067.1	122	0.604	0.662667	0.853973	0.633197	-0.0586667	-34.956	6100000	6150000
OY776067.1	123	0.616	0.715333	0.950146	0.704507	-0.0993333	-59.1869	6150000	6200000
OY776067.1	124	0.5	0.609333	0.833492	0.618011	-0.109333	-65.1453	6200000	6250000
OY776067.1	125	0.290667	0.182667	2.3883	1.77086	0.108	64.3508	6250000	6300000
OY776067.1	126	0.218333	0.151667	1.3562	1.00558	0.0666667	39.7227	6300000	6350000
OY776067.1	127	0.282	0.256	1.11586	0.827382	0.026	15.4919	6350000	6400000
OY776067.1	128	0.525333	0.371333	1.59613	1.18349	0.154	91.7595	6400000	6450000
OY776067.1	129	0.213333	0.156	1.1575	0.858251	0.0573333	34.1616	6450000	6500000
OY776067.1	130	0.311333	0.396	0.783609	0.581024	-0.0846667	-50.4479	6500000	6550000
OY776067.1	131	0.540667	0.494667	1.25675	0.931846	0.046	27.4087	6550000	6600000
OY776067.1	132	0.584	0.657333	0.939314	0.696475	-0.0733333	-43.695	6600000	6650000
OY776067.1	133	0.476	0.504	1.39547	1.0347	-0.028	-16.6836	6650000	6700000
OY776067.1	134	0.159333	0.491333	0.338117	0.250704	-0.332	-197.819	6700000	6750000
OY776067.1	135	0.39	0.4	2.01888	1.49694	-0.01	-5.95841	6750000	6800000
OY776067.1	136	0.333333	0.220667	5.27832	3.91373	0.112667	67.1314	6800000	6850000
OY776067.1	137	0.378	0.193333	2.0688	1.53396	0.184667	110.032	6850000	6900000
OY776067.1	138	0.33	0.200667	2.03587	1.50954	0.129333	77.0621	6900000	6950000
OY776067.1	139	0.231333	0.208667	1.21448	0.900503	0.0226667	13.5057	6950000	7000000
OY776067.1	140	0.0846667	0.166	0.485288	0.359828	-0.0813333	-48.4617	7000000	7050000
OY776067.1	141	0.273333	0.2975	0.949638	0.70413	-0.0241667	-14.3995	7050000	7090000
OY776068.1	0	0.141333	0.154	1.03382	0.766547	-0.0126667	-7.54732	0	50000
OY776068.1	1	0.100667	0.204667	0.484168	0.358997	-0.104	-61.9675	50000	100000
OY776068.1	2	0.282667	0.616	0.340167	0.252224	-0.333333	-198.614	100000	150000
OY776068.1	3	0.277333	0.488667	0.617814	0.458092	-0.211333	-125.921	150000	200000
OY776068.1	4	0.463333	0.424	1.08872	0.807257	0.0393333	23.4364	200000	250000
OY776068.1	5	0.452667	0.516667	0.819455	0.607603	-0.064	-38.1338	250000	300000
OY776068.1	6	0.00444444	0.00666667	0.666667	0.494315	-0.00222222	-1.32409	300000	330000
OY776068.1	7	0.384667	0.381333	1.02009	0.756368	0.00333333	1.98614	350000	400000
OY776068.1	8	0.457037	0.325926	1.53973	1.14167	0.131111	78.1214	400000	445000
OY776068.1	9	0.33	0.322667	1.1507	0.853213	0.00733333	4.3695	450000	500000
OY776068.1	10	0.422667	0.488667	0.865347	0.64163	-0.066	-39.3255	500000	550000
OY776068.1	11	0.554	0.532667	1.14369	0.848016	0.0213333	12.7113	550000	600000
OY776068.1	12	0.632667	0.546	1.17459	0.870927	0.0866667	51.6396	600000	650000
OY776068.1	13	0.348667	0.374667	1.04489	0.774753	-0.026	-15.4919	650000	700000
OY776068.1	14	0.348148	0.400741	0.891463	0.660995	-0.0525926	-31.3368	705000	750000
OY776068.1	15	0.396667	0.433333	0.93064	0.690043	-0.0366667	-21.8475	750000	800000
OY776068.1	16	0.41	0.414667	1.081	0.801533	-0.00466667	-2.78059	800000	850000
OY776068.1	17	0.412	0.392	1.34692	0.998704	0.02	11.9168	850000	900000
OY776068.1	18	0.405333	0.457333	1.14737	0.850742	-0.052	-30.9837	900000	950000
OY776068.1	19	0.161333	0.292	0.620022	0.459729	-0.130667	-77.8566	950000	1000000
OY776068.1	20	0.678	0.562667	1.27697	0.946837	0.115333	68.7203	1000000	1050000
OY776068.1	21	0.456667	0.486	1.01613	0.753434	-0.0293333	-17.478	1050000	1100000
OY776068.1	22	0.471333	0.549333	1.01696	0.75405	-0.078	-46.4756	1100000	1150000
OY776068.1	23	0.367333	0.410667	0.892845	0.662019	-0.0433333	-25.8198	1150000	1200000
OY776068.1	24	0.422	0.344667	1.32876	0.985239	0.0773333	46.0784	1200000	1250000
OY776068.1	25	0.488	0.504667	0.985512	0.730729	-0.0166667	-9.93068	1250000	1300000
OY776068.1	26	0.384	0.428667	0.987533	0.732228	-0.0446667	-26.6142	1300000	1350000
OY776068.1	27	0.312667	0.239333	1.46181	1.08389	0.0733333	43.695	1350000	1400000
OY776068.1	28	0.258	0.164	1.74579	1.29445	0.094	56.0091	1400000	1450000
OY776068.1	29	0.36	0.424667	1.22319	0.90696	-0.0646667	-38.5311	1450000	1500000
OY776068.1	30	0.249333	0.0933333	3.47819	2.57898	0.156	92.9512	1500000	1550000
OY776068.1	31	0.123704	0.103704	1.63208	1.21014	0.02	11.9168	1550000	1595000
OY776068.1	32	0.288667	0.343333	0.887496	0.658053	-0.0546667	-32.5726	1600000	1650000
OY776068.1	33	0.176	0.356667	0.436317	0.323517	-0.180667	-107.649	1650000	1700000
OY776068.1	34	0.251333	0.286	0.735694	0.545496	-0.0346667	-20.6558	1700000	1750000
OY776068.1	35	0.600667	0.498	1.29991	0.963848	0.102667	61.173	1750000	1800000
OY776068.1	36	0.268667	0.242	1.18087	0.875579	0.0266667	15.8891	1800000	1850000
OY776068.1	37	0.174	0.18	1.85183	1.37308	-0.006	-3.57505	1850000	1900000
OY776068.1	38	0.228667	0.209333	0.932059	0.691096	0.0193333	11.5196	1900000	1950000
OY776068.1	39	0.104444	0.122222	0.731689	0.542527	-0.0177778	-10.5927	1950000	2000000
OY776068.1	40	0.307333	0.231333	1.26312	0.936571	0.076	45.2839	2000000	2050000
OY776068.1	41	0.163704	0.128889	3.09738	2.29662	0.0348148	20.7441	2050000	2100000
OY776068.1	42	0.372667	0.514	0.776026	0.575401	-0.141333	-84.2122	2100000	2150000
OY776068.1	43	0.490667	0.645333	0.808016	0.599121	-0.154667	-92.1568	2150000	2200000
OY776068.1	44	0.249333	0.362667	0.791747	0.587058	-0.113333	-67.5287	2200000	2250000
OY776068.1	45	0.3	0.274667	1.07845	0.79964	0.0253333	15.0946	2250000	2300000
OY776068.1	46	0.301333	0.582	0.581268	0.430994	-0.280667	-167.233	2300000	2350000
OY776068.1	47	0.332	0.336	1.02424	0.759446	-0.004	-2.38336	2350000	2400000
OY776068.1	48	0.24	0.214667	1.0848	0.804348	0.0253333	15.0946	2400000	2450000
OY776068.1	49	0.320667	0.218	1.98723	1.47348	0.102667	61.173	2450000	2500000
OY776068.1	50	0.402	0.312667	1.32405	0.981745	0.0893333	53.2285	2500000	2550000
OY776068.1	51	0.467333	0.263333	3.84499	2.85095	0.204	121.552	2550000	2600000
OY776068.1	52	0.282	0.296667	1.22884	0.911152	-0.0146667	-8.739	2600000	2650000
OY776068.1	53	0.144667	0.165333	0.892864	0.662034	-0.0206667	-12.314	2650000	2700000
OY776068.1	54	0.196667	0.209333	0.982502	0.728498	-0.0126667	-7.54732	2700000	2750000
OY776068.1	55	0.259333	0.342667	0.853081	0.632536	-0.0833333	-49.6534	2750000	2800000
OY776068.1	56	0.116	0.225333	0.610315	0.452532	-0.109333	-65.1453	2800000	2850000
OY776068.1	57	0.0913333	0.188	0.47823	0.354594	-0.0966667	-57.598	2850000	2900000
OY776068.1	58	0.149333	0.406	0.396203	0.293773	-0.256667	-152.933	2900000	2950000
OY776068.1	59	0.254667	0.373333	0.658657	0.488376	-0.118667	-70.7065	2950000	3000000
OY776068.1	60	0.0577778	0.215556	0.221538	0.164264	-0.157778	-94.0105	3000000	3050000
OY776068.1	61	0.105833	0.145833	0.426642	0.316343	-0.04	-23.8336	3055000	3100000
OY776068.1	62	0.0481481	0.0851852	0.589161	0.436846	-0.037037	-22.0682	3100000	3150000
OY776068.1	63	0.348	0.437333	0.737339	0.546716	-0.0893333	-53.2285	3150000	3200000
OY776068.1	64	0.152667	0.314	0.51148	0.379248	-0.161333	-96.129	3200000	3250000
OY776068.1	65	0.196667	0.327333	0.817853	0.606415	-0.130667	-77.8566	3250000	3300000
OY776068.1	66	0.0866667	0.16	0.495456	0.367366	-0.0733333	-43.695	3300000	3350000
OY776068.1	67	0.114667	0.217333	0.478559	0.354838	-0.102667	-61.173	3350000	3400000
OY776068.1	68	0.255333	0.274667	0.843907	0.625733	-0.0193333	-11.5196	3400000	3450000
OY776068.1	69	0.088	0.201333	0.340115	0.252186	-0.113333	-67.5287	3450000	3500000
OY776068.1	70	0.0526667	0.213333	0.524294	0.388749	-0.160667	-95.7318	3500000	3550000
OY776068.1	71	0.134667	0.11	1.62225	1.20285	0.0246667	14.6974	3550000	3600000
OY776068.1	72	0.352	0.461333	0.705355	0.523001	-0.109333	-65.1453	3600000	3650000
OY776068.1	73	0.196	0.336	0.599376	0.44442	-0.14	-83.4178	3650000	3700000
OY776068.1	74	0.137333	0.24	0.551252	0.408738	-0.102667	-61.173	3700000	3750000
OY776068.1	75	0.178667	0.347333	0.642708	0.47655	-0.168667	-100.499	3750000	3800000
OY776068.1	76	0.334667	0.282667	1.21964	0.904326	0.052	30.9837	3800000	3850000
OY776068.1	77	0.334	0.357333	0.92275	0.684193	-0.0233333	-13.903	3850000	3900000
OY776068.1	78	0.123333	0.147333	0.844032	0.625826	-0.024	-14.3002	3900000	3950000
OY776068.1	79	0.187333	0.197333	1.24899	0.926094	-0.01	-5.95841	3950000	4000000
OY776068.1	80	0.305333	0.247333	1.18609	0.879454	0.058	34.5588	4000000	4050000
OY776068.1	81	0.461333	0.4	1.22792	0.910468	0.0613333	36.5449	4050000	4100000
OY776068.1	82	0.259333	0.288	0.921298	0.683117	-0.0286667	-17.0808	4100000	4150000
OY776068.1	83	0.286667	0.253333	1.39459	1.03405	0.0333333	19.8614	4150000	4200000
OY776068.1	84	0.264667	0.300667	1.09059	0.808644	-0.036	-21.4503	4200000	4250000
OY776068.1	85	0.149333	0.1	2.53949	1.88296	0.0493333	29.3948	4250000	4300000
OY776068.1	86	0.156667	0.217333	0.717535	0.532032	-0.0606667	-36.1477	4300000	4350000
OY776068.1	87	0.218667	0.317333	0.825166	0.611837	-0.0986667	-58.7897	4350000	4400000
OY776068.1	88	0.337333	0.254	2.09759	1.5553	0.0833333	49.6534	4400000	4450000
OY776068.1	89	0.194167	0.254167	0.927362	0.687613	-0.06	-35.7505	4450000	4500000
OY776068.1	90	0.252667	0.086	8.71873	6.4647	0.166667	99.3068	4500000	4550000
OY776068.1	91	0.273333	0.332667	1.15479	0.856241	-0.0593333	-35.3532	4550000	4600000
OY776068.1	92	0.356667	0.307333	1.71272	1.26993	0.0493333	29.3948	4600000	4650000
OY776068.1	93	0.217333	0.104	3.33901	2.47578	0.113333	67.5287	4650000	4700000
OY776068.1	94	0.258	0.369333	0.776937	0.576077	-0.111333	-66.337	4700000	4750000
OY776068.1	95	0.241333	0.223333	1.0031	0.743771	0.018	10.7251	4750000	4800000
OY776068.1	96	0.28	0.254667	1.12769	0.836148	0.0253333	15.0946	4800000	4850000
OY776068.1	97	0.372667	0.334	1.16821	0.866194	0.0386667	23.0392	4850000	4900000
OY776068.1	98	0.338667	0.306667	1.20344	0.892319	0.032	19.0669	4900000	4950000
OY776068.1	99	0.182667	0.121333	3.64138	2.69998	0.0613333	36.5449	4950000	5000000
OY776068.1	100	0.317333	0.2	1.79464	1.33067	0.117333	69.912	5000000	5050000
OY776068.1	101	0.0733333	0.108	0.66463	0.492804	-0.0346667	-20.6558	5050000	5100000
OY776068.1	102	0.364	0.41	1.36468	1.01187	-0.046	-27.4087	5100000	5150000
OY776068.1	103	0.412593	0.417037	1.19403	0.885337	-0.00444444	-2.64818	5150000	5195000
OY776068.1	104	0.320667	0.181333	7.68383	5.69734	0.139333	83.0205	5200000	5250000
OY776068.1	105	0.272667	0.225333	1.29515	0.960319	0.0473333	28.2031	5250000	5300000
OY776068.1	106	0.390667	0.234	2.11078	1.56509	0.156667	93.3484	5300000	5350000
OY776068.1	107	0.340667	0.132667	10.1423	7.52022	0.208	123.935	5350000	5400000
OY776068.1	108	0.287333	0.282667	1.19319	0.884716	0.00466667	2.78059	5400000	5450000
OY776068.1	109	0.314667	0.376	0.876269	0.649729	-0.0613333	-36.5449	5450000	5500000
OY776068.1	110	0.132	0.245333	0.486454	0.360692	-0.113333	-67.5287	5500000	5550000
OY776068.1	111	0.217333	0.0986667	4.56989	3.38845	0.118667	70.7065	5550000	5600000
OY776068.1	112	0.242	0.161333	1.72524	1.27921	0.0806667	48.0645	5600000	5650000
OY776068.1	113	0.278	0.390667	0.869188	0.644479	-0.112667	-67.1314	5650000	5700000
OY776068.1	114	0.330667	0.428667	1.04696	0.77629	-0.098	-58.3924	5700000	5750000
OY776068.1	115	0.285333	0.264667	1.62808	1.20718	0.0206667	12.314	5750000	5800000
OY776068.1	116	0.137037	0.144444	1.96516	1.45711	-0.00740741	-4.41364	5800000	5850000
OY776068.1	117	0.173333	0.171333	1.57532	1.16806	0.002	1.19168	5850000	5900000
OY776068.1	118	0.274	0.315333	0.953673	0.707122	-0.0413333	-24.6281	5900000	5950000
OY776068.1	119	0.254	0.221333	1.2606	0.9347	0.0326667	19.4641	5950000	6000000
OY776068.1	120	0.208	0.253333	0.826284	0.612667	-0.0453333	-27.0115	6000000	6050000
OY776068.1	121	0.217333	0.189333	1.18506	0.878688	0.028	16.6836	6050000	6100000
OY776068.1	122	0.290667	0.215333	1.41906	1.05219	0.0753333	44.8867	6100000	6150000
OY776068.1	123	0.197333	0.228	0.964704	0.715301	-0.0306667	-18.2725	6150000	6200000
OY776068.1	124	0.174	0.19	1.71104	1.26869	-0.016	-9.53346	6200000	6250000
OY776068.1	125	0.43	0.468667	0.952961	0.706594	-0.0386667	-23.0392	6250000	6300000
OY776068.1	126	0.151333	0.275333	0.672616	0.498726	-0.124	-73.8843	6300000	6350000
OY776068.1	127	0.364667	0.376667	1.06193	0.787394	-0.012	-7.15009	6350000	6400000
OY776068.1	128	0.354667	0.382667	1.0295	0.763345	-0.028	-16.6836	6400000	6450000
OY776068.1	129	0.314	0.493333	0.652256	0.48363	-0.179333	-106.854	6450000	6500000
OY776068.1	130	0.118	0.182667	2.47253	1.83331	-0.0646667	-38.5311	6500000	6550000
OY776068.1	131	0.502963	0.525926	1.61224	1.19543	-0.022963	-13.6823	6550000	6600000
OY776068.1	132	0.240952	0.286667	2.25551	1.67239	-0.0457143	-27.2384	6600000	6650000
OY776068.1	133	0.19	0.291333	0.629342	0.466639	-0.101333	-60.3786	6650000	6700000
OY776068.1	134	0.260667	0.260667	0.993706	0.736805	1.38778e-17	8.572e-15	6700000	6750000
OY776068.1	135	0.266	0.399333	0.72733	0.539295	-0.133333	-79.4455	6750000	6800000
OY776068.1	136	0.179259	0.077037	14.549	10.7877	0.102222	60.9082	6800000	6850000
OY776068.1	137	0.136667	0.14	0.986118	0.731179	-0.00333333	-1.98614	6850000	6900000
OY776068.1	138	0.184667	0.274	0.713398	0.528965	-0.0893333	-53.2285	6900000	6950000
OY776068.1	139	0.166	0.155333	1.09986	0.815517	0.0106667	6.35564	6950000	7000000
OY776068.1	140	0.140741	0.156296	0.94223	0.698637	-0.0155556	-9.26864	7000000	7045000
OY776069.1	0	0.19037	0.145185	1.78987	1.32714	0.0451852	26.9232	0	45000
OY776069.1	1	0.11	0.106	1.36945	1.01541	0.004	2.38336	50000	100000
OY776069.1	2	0.0875	0.0708333	1.0696	0.793082	0.0166667	9.93068	105000	150000
OY776069.1	3	0.0526667	0.0246667	2.78394	2.06421	0.028	16.6836	150000	200000
OY776069.1	4	0.198667	0.0873333	4.80043	3.55939	0.111333	66.337	200000	250000
OY776069.1	5	0.297333	0.295333	1.14171	0.846547	0.002	1.19168	250000	300000
OY776069.1	6	0.491333	0.567333	0.848923	0.629453	-0.076	-45.2839	300000	350000
OY776069.1	7	0.591333	0.485333	1.38894	1.02986	0.106	63.1592	350000	400000
OY776069.1	8	0.531333	0.496667	1.05179	0.77987	0.0346667	20.6558	400000	450000
OY776069.1	9	0.344	0.394667	0.755648	0.560292	-0.0506667	-30.1893	450000	500000
OY776069.1	10	0.408	0.48	0.867806	0.643454	-0.072	-42.9006	500000	550000
OY776069.1	11	0.412	0.386667	1.0621	0.787517	0.0253333	15.0946	550000	600000
OY776069.1	12	0.484667	0.498	0.943653	0.699692	-0.0133333	-7.94455	600000	650000
OY776069.1	13	0.432	0.476	0.934911	0.69321	-0.044	-26.217	650000	700000
OY776069.1	14	0.568	0.528	1.08578	0.805073	0.04	23.8336	700000	750000
OY776069.1	15	0.623333	0.538	1.24423	0.922564	0.0853333	50.8451	750000	800000
OY776069.1	16	0.436	0.379333	1.24962	0.926558	0.0566667	33.7643	800000	850000
OY776069.1	17	0.418	0.487333	0.851224	0.631159	-0.0693333	-41.3116	850000	900000
OY776069.1	18	0.414667	0.456	0.941157	0.697842	-0.0413333	-24.6281	900000	950000
OY776069.1	19	0.285333	0.246667	1.18858	0.881302	0.0386667	23.0392	950000	1000000
OY776069.1	20	0.634	0.496	1.45357	1.07778	0.138	82.2261	1000000	1050000
OY776069.1	21	0.364	0.35	1.46946	1.08956	0.014	8.34178	1050000	1100000
OY776069.1	22	0.475333	0.420667	1.00927	0.748344	0.0546667	32.5726	1100000	1150000
OY776069.1	23	0.568667	0.614	0.968515	0.718127	-0.0453333	-27.0115	1150000	1200000
OY776069.1	24	0.462	0.588	0.979187	0.726039	-0.126	-75.076	1200000	1250000
OY776069.1	25	0.374667	0.332667	1.30786	0.969743	0.042	25.0253	1250000	1300000
OY776069.1	26	0.867333	0.717333	1.26959	0.941362	0.15	89.3762	1300000	1350000
OY776069.1	27	0.342	0.469333	0.863806	0.640488	-0.127333	-75.8704	1350000	1400000
OY776069.1	28	0.186	0.253333	0.689067	0.510924	-0.0673333	-40.12	1400000	1450000
OY776069.1	29	0.346667	0.420667	0.793086	0.588051	-0.074	-44.0922	1450000	1500000
OY776069.1	30	0.389333	0.422667	0.962688	0.713807	-0.0333333	-19.8614	1500000	1550000
OY776069.1	31	0.506667	0.468667	1.1056	0.819773	0.038	22.642	1550000	1600000
OY776069.1	32	0.317333	0.483333	0.761143	0.564366	-0.166	-98.9096	1600000	1650000
OY776069.1	33	0.694667	0.576	1.43573	1.06456	0.118667	70.7065	1650000	1700000
OY776069.1	34	0.734	0.731333	1.13738	0.843335	0.00266667	1.58891	1700000	1750000
OY776069.1	35	0.402	0.386667	1.1454	0.849282	0.0153333	9.13623	1750000	1800000
OY776069.1	36	0.657333	0.604667	1.06159	0.787141	0.0526667	31.381	1800000	1850000
OY776069.1	37	0.562667	0.535333	1.16802	0.866058	0.0273333	16.2863	1850000	1900000
OY776069.1	38	0.880667	0.870667	1.00075	0.742027	0.01	5.95841	1900000	1950000
OY776069.1	39	0.368	0.314667	1.43194	1.06174	0.0533333	31.7782	1950000	2000000
OY776069.1	40	0.516	0.504667	1.12355	0.833081	0.0113333	6.75287	2000000	2050000
OY776069.1	41	0.338	0.406667	0.747127	0.553974	-0.0686667	-40.9144	2050000	2100000
OY776069.1	42	0.4	0.368	1.25305	0.929101	0.032	19.0669	2100000	2150000
OY776069.1	43	0.514	0.431333	1.24794	0.925314	0.0826667	49.2562	2150000	2200000
OY776069.1	44	0.554667	0.543333	1.06245	0.787774	0.0113333	6.75287	2200000	2250000
OY776069.1	45	0.416667	0.395333	1.0523	0.780249	0.0213333	12.7113	2250000	2300000
OY776069.1	46	0.482	0.542667	0.894086	0.66294	-0.0606667	-36.1477	2300000	2350000
OY776069.1	47	0.39	0.388667	0.988203	0.732725	0.00133333	0.794455	2350000	2400000
OY776069.1	48	0.470667	0.474	1.02267	0.758281	-0.00333333	-1.98614	2400000	2450000
OY776069.1	49	0.224667	0.312	0.673618	0.499469	-0.0873333	-52.0368	2450000	2500000
OY776069.1	50	0.395333	0.402	0.94543	0.70101	-0.00666667	-3.97227	2500000	2550000
OY776069.1	51	0.536667	0.457333	1.28506	0.952836	0.0793333	47.2701	2550000	2600000
OY776069.1	52	0.304667	0.316667	1.05881	0.785077	-0.012	-7.15009	2600000	2650000
OY776069.1	53	0.464	0.495333	1.10826	0.821747	-0.0313333	-18.6697	2650000	2700000
OY776069.1	54	0.27	0.27	1.14871	0.851739	2.77352e-18	3.56486e-16	2700000	2750000
OY776069.1	55	0.287407	0.36	1.92442	1.4269	-0.0725926	-43.2536	2750000	2795000
OY776069.1	56	0.346667	0.26	1.30822	0.970011	0.0866667	51.6396	2800000	2850000
OY776069.1	57	0.496	0.507333	1.20371	0.892514	-0.0113333	-6.75287	2850000	2900000
OY776069.1	58	0.412	0.384667	1.14382	0.848111	0.0273333	16.2863	2900000	2950000
OY776069.1	59	0.333333	0.256	1.59552	1.18303	0.0773333	46.0784	2950000	3000000
OY776069.1	60	0.266	0.226	1.44384	1.07057	0.04	23.8336	3000000	3050000
OY776069.1	61	0.358667	0.461333	0.721736	0.535147	-0.102667	-61.173	3050000	3100000
OY776069.1	62	0.320667	0.33	1.03077	0.764285	-0.00933333	-5.56118	3100000	3150000
OY776069.1	63	0.371111	0.221481	8.41165	6.237	0.14963	89.1555	3150000	3200000
OY776069.1	64	0.444444	0.161481	19.7693	14.6583	0.282963	168.601	3200000	3250000
OY776069.1	65	0.214667	0.300667	0.768823	0.570061	-0.086	-51.2423	3250000	3300000
OY776069.1	66	0.222667	0.148	2.36378	1.75268	0.0746667	44.4895	3300000	3350000
OY776069.1	67	0.214074	0.0881481	8.71839	6.46444	0.125926	75.0318	3350000	3400000
OY776069.1	68	0.458	0.224667	7.74517	5.74283	0.233333	139.03	3400000	3450000
OY776069.1	69	0.458	0.152	4.26069	3.15918	0.306	182.327	3450000	3500000
OY776069.1	70	0.586667	0.217037	7.08342	5.25216	0.36963	220.241	3500000	3550000
OY776069.1	71	0.463333	0.238	6.00993	4.45619	0.225333	134.263	3550000	3600000
OY776069.1	72	0.518667	0.160667	6.07523	4.50461	0.358	213.311	3600000	3650000
OY776069.1	73	0.552667	0.0973333	6.72805	4.98866	0.455333	271.306	3650000	3700000
OY776069.1	74	0.303333	0.102667	4.47355	3.31702	0.200667	119.565	3700000	3750000
OY776069.1	75	0.117778	0.102222	2.08752	1.54784	0.0155556	9.26864	3750000	3800000
OY776069.1	76	0.208889	0.185185	1.58916	1.17832	0.0237037	14.1236	3800000	3850000
OY776069.1	77	0.256667	0.194	2.4488	1.81572	0.0626667	37.3394	3850000	3900000
OY776069.1	78	0.212667	0.172667	1.27055	0.942074	0.04	23.8336	3900000	3950000
OY776069.1	79	0.376667	0.222667	3.40876	2.5275	0.154	91.7595	3950000	4000000
OY776069.1	80	0.183333	0.163333	1.65951	1.23048	0.02	11.9168	4000000	4050000
OY776069.1	81	0.1725	0.211667	0.873026	0.647324	-0.0391667	-23.3371	4050000	4100000
OY776069.1	82	0.0918519	0.0407407	5.88872	4.36632	0.0511111	30.4541	4100000	4150000
OY776069.1	83	0.136296	0.14963	0.98826	0.732767	-0.0133333	-7.94455	4150000	4200000
OY776069.1	84	0.282	0.305333	0.824287	0.611186	-0.0233333	-13.903	4200000	4250000
OY776069.1	85	0.227407	0.304444	0.744691	0.552167	-0.077037	-45.9018	4250000	4300000
OY776069.1	86	0.112	0.104667	0.929189	0.688968	0.00733333	4.3695	4300000	4350000
OY776069.1	87	0.280667	0.279333	0.977122	0.724508	0.00133333	0.794455	4350000	4400000
OY776069.1	88	0.268667	0.297333	1.05148	0.779646	-0.0286667	-17.0808	4400000	4450000
OY776069.1	89	0.322	0.288	1.19772	0.888077	0.034	20.2586	4450000	4500000
OY776069.1	90	0.266	0.145333	2.85396	2.11614	0.120667	71.8982	4500000	4550000
OY776069.1	91	0.23037	0.14	1.94374	1.44123	0.0903704	53.8464	4550000	4600000
OY776069.1	92	0.323333	0.464667	0.707181	0.524355	-0.141333	-84.2122	4600000	4650000
OY776069.1	93	0.298667	0.459333	0.717606	0.532084	-0.160667	-95.7318	4650000	4700000
OY776069.1	94	0.256667	0.302667	0.859298	0.637145	-0.046	-27.4087	4700000	4750000
OY776069.1	95	0.224	0.325333	0.681432	0.505262	-0.101333	-60.3786	4750000	4800000
OY776069.1	96	0.208	0.285333	0.843051	0.625099	-0.0773333	-46.0784	4800000	4850000
OY776069.1	97	0.230667	0.294	1.25405	0.929841	-0.0633333	-37.7366	4850000	4900000
OY776069.1	98	0.172667	0.140667	1.40275	1.0401	0.032	19.0669	4900000	4950000
OY776069.1	99	0.298	0.140667	2.63807	1.95605	0.157333	93.7457	4950000	5000000
OY776069.1	100	0.386667	0.466	1.98516	1.47194	-0.0793333	-47.2701	5000000	5050000
OY776069.1	101	0.543333	0.425333	1.97552	1.4648	0.118	70.3092	5050000	5100000
OY776069.1	102	0.654	0.668667	1.00688	0.746571	-0.0146667	-8.739	5100000	5150000
OY776069.1	103	0.672667	0.638	1.2031	0.892066	0.0346667	20.6558	5150000	5200000
OY776069.1	104	0.330667	0.308667	1.10162	0.816823	0.022	13.1085	5200000	5250000
OY776069.1	105	0.446	0.471333	1.02037	0.756573	-0.0253333	-15.0946	5250000	5300000
OY776069.1	106	0.249333	0.257333	1.12779	0.836223	-0.008	-4.76673	5300000	5350000
OY776069.1	107	0.166	0.324	0.510945	0.378851	-0.158	-94.1429	5350000	5400000
OY776069.1	108	0.462667	0.422667	1.34346	0.99614	0.04	23.8336	5400000	5450000
OY776069.1	109	0.650667	0.471333	1.38059	1.02367	0.179333	106.854	5450000	5500000
OY776069.1	110	0.457333	0.224	2.45757	1.82222	0.233333	139.03	5500000	5550000
OY776069.1	111	0.344667	0.150667	3.05351	2.2641	0.194	115.593	5550000	5600000
OY776069.1	112	0.667333	0.472667	1.48992	1.10473	0.194667	115.99	5600000	5650000
OY776069.1	113	0.574667	0.528	1.14031	0.845511	0.0466667	27.8059	5650000	5700000
OY776069.1	114	0.305926	0.254815	1.09839	0.814423	0.0511111	30.4541	5700000	5745000
OY776069.1	115	0.260667	0.272667	0.989592	0.733755	-0.012	-7.15009	5750000	5800000
OY776069.1	116	0.316667	0.278	1.82516	1.3533	0.0386667	23.0392	5800000	5850000
OY776069.1	117	0.213333	0.184667	1.18306	0.877205	0.0286667	17.0808	5850000	5900000
OY776069.1	118	0.358667	0.366667	1.06733	0.791394	-0.008	-4.76673	5900000	5950000
OY776069.1	119	0.178	0.101333	2.74404	2.03463	0.0766667	45.6811	5950000	6000000
OY776069.1	120	0.512667	0.501333	1.02818	0.762367	0.0113333	6.75287	6000000	6050000
OY776069.1	121	0.498	0.490667	1.11579	0.827326	0.00733333	4.3695	6050000	6100000
OY776069.1	122	0.136	0.303333	0.668036	0.49533	-0.167333	-99.7041	6100000	6150000
OY776069.1	123	0.275333	0.28	1.45464	1.07857	-0.00466667	-2.78059	6150000	6200000
OY776069.1	124	0.527333	0.424	1.36209	1.00995	0.103333	61.5702	6200000	6250000
OY776069.1	125	0.295333	0.248667	1.18413	0.877997	0.0466667	27.8059	6250000	6300000
OY776069.1	126	0.35	0.275333	1.49388	1.10767	0.0746667	44.4895	6300000	6350000
OY776069.1	127	0.277333	0.280667	0.947244	0.702355	-0.00333333	-1.98614	6350000	6400000
OY776069.1	128	0.547333	0.396667	1.43617	1.06488	0.150667	89.7734	6400000	6450000
OY776069.1	129	0.461333	0.33	1.57481	1.16768	0.131333	78.2538	6450000	6500000
OY776069.1	130	0.359333	0.381333	0.936587	0.694453	-0.022	-13.1085	6500000	6550000
OY776069.1	131	0.550667	0.521333	0.955213	0.708264	0.0293333	17.478	6550000	6600000
OY776069.1	132	0.528	0.511333	1.1086	0.821993	0.0166667	9.93068	6600000	6650000
OY776069.1	133	0.594667	0.495333	1.28517	0.952921	0.0993333	59.1869	6650000	6700000
OY776069.1	134	0.391333	0.288	1.47779	1.09574	0.103333	61.5702	6700000	6750000
OY776069.1	135	0.384	0.348667	1.2124	0.898964	0.0353333	21.0531	6750000	6800000
OY776069.1	136	0.262	0.296	0.808505	0.599484	-0.034	-20.2586	6800000	6850000
OY776069.1	137	0.167333	0.256	0.84767	0.628523	-0.0886667	-52.8312	6850000	6900000
OY776069.1	138	0.0785185	0.106667	0.713582	0.529101	-0.0281481	-16.7718	6900000	6950000
OY776069.1	139	0.147407	0.171852	0.951208	0.705294	-0.0244444	-14.565	6950000	6995000
OY776070.1	0	0.0293333	0.106667	0.338386	0.250904	-0.0773333	-46.0784	0	50000
OY776070.1	1	0.122667	0.246	0.57632	0.427325	-0.123333	-73.4871	50000	100000
OY776070.1	2	0.18	0.131111	2.13743	1.58485	0.0488889	29.13	100000	150000
OY776070.1	3	0.283704	0.222222	1.7012	1.26139	0.0614815	36.6332	150000	200000
OY776070.1	4	0.388667	0.311333	2.09993	1.55704	0.0773333	46.0784	200000	250000
OY776070.1	5	0.324667	0.411333	0.928797	0.688677	-0.0866667	-51.6396	250000	300000
OY776070.1	6	0.250667	0.417333	0.632564	0.469028	-0.166667	-99.3068	300000	350000
OY776070.1	7	0.464667	0.415333	1.13647	0.842663	0.0493333	29.3948	350000	400000
OY776070.1	8	0.372667	0.302	2.20488	1.63485	0.0706667	42.1061	400000	450000
OY776070.1	9	0.414667	0.319333	1.91164	1.41743	0.0953333	56.8035	450000	500000
OY776070.1	10	0.353333	0.326667	1.65977	1.23067	0.0266667	15.8891	500000	550000
OY776070.1	11	0.262667	0.224667	1.46053	1.08294	0.038	22.642	550000	600000
OY776070.1	12	0.09	0.185333	0.817185	0.60592	-0.0953333	-56.8035	600000	650000
OY776070.1	13	0.096	0.111333	1.03675	0.768724	-0.0153333	-9.13623	650000	700000
OY776070.1	14	0.412667	0.393333	1.09233	0.809934	0.0193333	11.5196	700000	750000
OY776070.1	15	0.461333	0.543333	0.928688	0.688596	-0.082	-48.859	750000	800000
OY776070.1	16	0.508	0.522667	1.02563	0.760476	-0.0146667	-8.739	800000	850000
OY776070.1	17	0.426667	0.567333	0.735596	0.545424	-0.140667	-83.815	850000	900000
OY776070.1	18	0.339333	0.382667	0.887043	0.657718	-0.0433333	-25.8198	900000	950000
OY776070.1	19	0.158	0.140667	1.3098	0.971183	0.0173333	10.3279	950000	1000000
OY776070.1	20	0.137778	0.123704	1.13073	0.838404	0.0140741	8.38591	1000000	1050000
OY776070.1	21	0.176	0.201333	1.00849	0.747766	-0.0253333	-15.0946	1050000	1100000
OY776070.1	22	0.165333	0.138	1.33303	0.988406	0.0273333	16.2863	1100000	1150000
OY776070.1	23	0.0946667	0.078	1.32181	0.980084	0.0166667	9.93068	1150000	1200000
OY776070.1	24	0.100741	0.0622222	1.96427	1.45645	0.0385185	22.9509	1200000	1250000
OY776070.1	25	0.153333	0.130667	1.2683	0.940407	0.0226667	13.5057	1250000	1300000
OY776070.1	26	0.414667	0.35	1.34382	0.996404	0.0646667	38.5311	1300000	1350000
OY776070.1	27	0.357333	0.417333	0.967016	0.717016	-0.06	-35.7505	1350000	1400000
OY776070.1	28	0.488	0.412	1.69853	1.25942	0.076	45.2839	1400000	1450000
OY776070.1	29	0.407333	0.282667	1.61687	1.19887	0.124667	74.2815	1450000	1500000
OY776070.1	30	0.372667	0.451333	0.825875	0.612364	-0.0786667	-46.8728	1500000	1550000
OY776070.1	31	0.749333	0.769333	0.990537	0.734455	-0.02	-11.9168	1550000	1600000
OY776070.1	32	0.376	0.316667	1.46503	1.08628	0.0593333	35.3532	1600000	1650000
OY776070.1	33	0.432667	0.324667	2.86584	2.12494	0.108	64.3508	1650000	1700000
OY776070.1	34	0.288	0.333333	1.02812	0.76232	-0.0453333	-27.0115	1700000	1750000
OY776070.1	35	0.324667	0.382667	1.07702	0.798578	-0.058	-34.5588	1750000	1800000
OY776070.1	36	0.310476	0.554286	0.532876	0.395113	-0.24381	-145.272	1800000	1850000
OY776070.1	37	0.296	0.42	0.72631	0.538539	-0.124	-73.8843	1850000	1900000
OY776070.1	38	0.315333	0.287333	1.21719	0.902513	0.028	16.6836	1900000	1950000
OY776070.1	39	0.272667	0.187333	3.65687	2.71147	0.0853333	50.8451	1950000	2000000
OY776070.1	40	0.094	0.052	2.12833	1.5781	0.042	25.0253	2000000	2050000
OY776070.1	41	0.127333	0.124	1.64046	1.21635	0.00333333	1.98614	2050000	2100000
OY776070.1	42	0.220667	0.300667	1.07344	0.795927	-0.08	-47.6673	2100000	2150000
OY776070.1	43	0.226	0.161333	1.43866	1.06673	0.0646667	38.5311	2150000	2200000
OY776070.1	44	0.183333	0.154667	1.47687	1.09505	0.0286667	17.0808	2200000	2250000
OY776070.1	45	0.298	0.311333	1.16122	0.861015	-0.0133333	-7.94455	2250000	2300000
OY776070.1	46	0.413333	0.0888889	10.894	8.07757	0.324444	193.317	2300000	2350000
OY776070.1	47	0.443333	0.458	1.11307	0.825308	-0.0146667	-8.739	2350000	2400000
OY776070.1	48	0.493333	0.256	1.96654	1.45813	0.237333	141.413	2400000	2450000
OY776070.1	49	0.49	0.450667	2.14258	1.58866	0.0393333	23.4364	2450000	2500000
OY776070.1	50	0.123704	0.208148	0.718292	0.532593	-0.0844444	-50.3155	2500000	2550000
OY776070.1	51	0.353333	0.467333	0.800187	0.593317	-0.114	-67.9259	2550000	2600000
OY776070.1	52	0.366667	0.244667	2.34543	1.73907	0.122	72.6926	2600000	2650000
OY776070.1	53	0.181481	0.263704	0.689783	0.511455	-0.0822222	-48.9914	2650000	2695000
OY776070.1	54	0.298667	0.431333	0.802999	0.595401	-0.132667	-79.0482	2700000	2750000
OY776070.1	55	0.591333	0.590667	1.07784	0.799191	0.000666667	0.397227	2750000	2800000
OY776070.1	56	0.364	0.659333	0.663512	0.491975	-0.295333	-175.972	2800000	2850000
OY776070.1	57	0.298	0.486	0.793701	0.588507	-0.188	-112.018	2850000	2900000
OY776070.1	58	0.430667	0.3	1.26712	0.939532	0.130667	77.8566	2900000	2950000
OY776070.1	59	0.383333	0.31	1.26389	0.93714	0.0733333	43.695	2950000	3000000
OY776070.1	60	0.256	0.278667	1.29088	0.957154	-0.0226667	-13.5057	3000000	3050000
OY776070.1	61	0.308667	0.396	0.797977	0.591678	-0.0873333	-52.0368	3050000	3100000
OY776070.1	62	0.204	0.224667	0.965674	0.71602	-0.0206667	-12.314	3100000	3150000
OY776070.1	63	0.264667	0.219333	1.09918	0.815009	0.0453333	27.0115	3150000	3200000
OY776070.1	64	0.217333	0.236	0.943911	0.699883	-0.0186667	-11.1224	3200000	3250000
OY776070.1	65	0.224	0.23	1.48814	1.10341	-0.006	-3.57505	3250000	3300000
OY776070.1	66	0.223333	0.236	1.07	0.793372	-0.0126667	-7.54732	3300000	3350000
OY776070.1	67	0.362667	0.368	1.00651	0.746296	-0.00533333	-3.17782	3350000	3400000
OY776070.1	68	0.333333	0.302	1.27502	0.945393	0.0313333	18.6697	3400000	3450000
OY776070.1	69	0.255333	0.281333	0.852793	0.632322	-0.026	-15.4919	3450000	3500000
OY776070.1	70	0.169333	0.216	0.813374	0.603094	-0.0466667	-27.8059	3500000	3550000
OY776070.1	71	0.173333	0.221333	0.826401	0.612753	-0.048	-28.6004	3550000	3600000
OY776070.1	72	0.0903704	0.14	0.60103	0.445647	-0.0496296	-29.5714	3600000	3645000
OY776070.1	73	0.188667	0.201333	0.949409	0.70396	-0.0126667	-7.54732	3650000	3700000
OY776070.1	74	0.461333	0.457333	0.953822	0.707232	0.004	2.38336	3700000	3750000
OY776070.1	75	0.348	0.354667	1.11611	0.827565	-0.00666667	-3.97227	3750000	3800000
OY776070.1	76	0.504667	0.426667	1.31004	0.971355	0.078	46.4756	3800000	3850000
OY776070.1	77	0.202222	0.179259	2.3096	1.7125	0.022963	13.6823	3850000	3895000
OY776070.1	78	0.505333	0.416	1.54307	1.14414	0.0893333	53.2285	3900000	3950000
OY776070.1	79	0.504667	0.656	0.681494	0.505308	-0.151333	-90.1706	3950000	4000000
OY776070.1	80	0.367333	0.462667	0.735614	0.545437	-0.0953333	-56.8035	4000000	4050000
OY776070.1	81	0.496	0.666	0.725512	0.537947	-0.17	-101.293	4050000	4100000
OY776070.1	82	0.609333	0.702667	0.892738	0.66194	-0.0933333	-55.6118	4100000	4150000
OY776070.1	83	0.457333	0.642667	0.696551	0.516473	-0.185333	-110.429	4150000	4200000
OY776070.1	84	0.650667	0.698	0.922879	0.684289	-0.0473333	-28.2031	4200000	4250000
OY776070.1	85	0.694	0.769333	0.949365	0.703928	-0.0753333	-44.8867	4250000	4300000
OY776070.1	86	0.286667	0.345926	0.836293	0.620088	-0.0592593	-35.3091	4305000	4350000
OY776070.1	87	0.538667	0.480667	1.16264	0.862064	0.058	34.5588	4350000	4400000
OY776070.1	88	0.226667	0.206667	2.3547	1.74595	0.02	11.9168	4400000	4450000
OY776070.1	89	0.54	0.557333	0.893996	0.662873	-0.0173333	-10.3279	4450000	4500000
OY776070.1	90	0.147407	0.434815	0.318055	0.235829	-0.287407	-171.249	4500000	4550000
OY776070.1	91	0.214667	0.209333	1.03528	0.767628	0.00533333	3.17782	4550000	4600000
OY776070.1	92	0.360667	0.335333	1.30248	0.965755	0.0253333	15.0946	4600000	4650000
OY776070.1	93	0.633333	0.733333	0.80676	0.59819	-0.1	-59.5841	4650000	4700000
OY776070.1	94	0.455333	0.666667	0.818696	0.60704	-0.211333	-125.921	4700000	4750000
OY776070.1	95	0.306667	0.257333	1.43415	1.06338	0.0493333	29.3948	4750000	4800000
OY776070.1	96	0.292667	0.312667	1.01369	0.751624	-0.02	-11.9168	4800000	4850000
OY776070.1	97	0.343333	0.360667	0.981579	0.727813	-0.0173333	-10.3279	4850000	4900000
OY776070.1	98	0.365333	0.442	0.784221	0.581478	-0.0766667	-45.6811	4900000	4950000
OY776070.1	99	0.546667	0.457333	1.38084	1.02386	0.0893333	53.2285	4950000	5000000
OY776070.1	100	0.451333	0.313333	1.72871	1.28179	0.138	82.2261	5000000	5050000
OY776070.1	101	0.703333	0.597333	1.24253	0.921304	0.106	63.1592	5050000	5100000
OY776070.1	102	0.223333	0.285333	0.633053	0.469391	-0.062	-36.9421	5100000	5150000
OY776070.1	103	0.444	0.483333	0.938873	0.696148	-0.0393333	-23.4364	5150000	5200000
OY776070.1	104	0.268667	0.357333	0.725655	0.538053	-0.0886667	-52.8312	5200000	5250000
OY776070.1	105	0.346	0.438	0.768162	0.569571	-0.092	-54.8174	5250000	5300000
OY776070.1	106	0.660667	0.798	0.846708	0.62781	-0.137333	-81.8288	5300000	5350000
OY776070.1	107	0.414	0.382667	1.22735	0.910044	0.0313333	18.6697	5350000	5400000
OY776070.1	108	0.597333	0.501333	1.18185	0.876308	0.096	57.2007	5400000	5450000
OY776070.1	109	1.04533	0.969333	1.09336	0.810696	0.076	45.2839	5450000	5500000
OY776070.1	110	0.618667	0.618	1.10156	0.816779	0.000666667	0.397227	5500000	5550000
OY776070.1	111	0.822	0.794	1.04345	0.773692	0.028	16.6836	5550000	5600000
OY776070.1	112	0.609333	0.645333	1.25869	0.93328	-0.036	-21.4503	5600000	5650000
OY776070.1	113	0.412667	0.512667	1.20354	0.892389	-0.1	-59.5841	5650000	5700000
OY776070.1	114	0.378	0.419333	0.961452	0.71289	-0.0413333	-24.6281	5700000	5750000
OY776070.1	115	0.388667	0.511333	0.772878	0.573068	-0.122667	-73.0898	5750000	5800000
OY776070.1	116	0.568	0.511333	1.39195	1.03209	0.0566667	33.7643	5800000	5850000
OY776070.1	117	0.329333	0.287333	1.25293	0.929013	0.042	25.0253	5850000	5900000
OY776070.1	118	0.554	0.506667	1.16949	0.867145	0.0473333	28.2031	5900000	5950000
OY776070.1	119	0.4	0.506667	0.799089	0.592503	-0.106667	-63.5564	5950000	6000000
OY776070.1	120	0.386667	0.458519	0.823645	0.61071	-0.0718519	-42.8123	6000000	6050000
OY776070.1	121	0.41	0.468667	0.806265	0.597823	-0.0586667	-34.956	6050000	6100000
OY776070.1	122	0.562667	0.512	1.13398	0.840818	0.0506667	30.1893	6100000	6150000
OY776070.1	123	0.707333	0.686	1.02906	0.763019	0.0213333	12.7113	6150000	6200000
OY776070.1	124	0.429333	0.398667	1.01283	0.750989	0.0306667	18.2725	6200000	6250000
OY776070.1	125	0.53	0.451333	4.23255	3.13832	0.0786667	46.8728	6250000	6300000
OY776070.1	126	0.418	0.406667	0.992236	0.735715	0.0113333	6.75287	6300000	6350000
OY776070.1	127	0.449333	0.346667	1.5042	1.11532	0.102667	61.173	6350000	6400000
OY776070.1	128	0.483333	0.434	1.10885	0.822183	0.0493333	29.3948	6400000	6450000
OY776070.1	129	0.426	0.423333	0.9382	0.695649	0.00266667	1.58891	6450000	6500000
OY776070.1	130	0.308667	0.344	0.877566	0.650691	-0.0353333	-21.0531	6500000	6550000
OY776070.1	131	0.207333	0.208667	1.06294	0.788142	-0.00133333	-0.794455	6550000	6600000
OY776070.1	132	0.122857	0.0704762	2.68873	1.99362	0.052381	31.2107	6600000	6650000
OY776070.1	133	0.410833	0.390833	1.21186	0.898561	0.02	11.9168	6660000	6700000
OY776070.1	134	0.56	0.411333	1.41972	1.05268	0.148667	88.5817	6700000	6750000
OY776070.1	135	0.218333	0.184167	0.937399	0.695055	0.0341667	20.3579	6750000	6800000
OY776071.1	0	0.0481481	0.0392593	1.16455	0.863481	0.00888889	5.29637	0	50000
OY776071.1	1	0.177333	0.102	2.33682	1.73269	0.0753333	44.8867	50000	100000
OY776071.1	2	0.312667	0.340667	1.30005	0.963953	-0.028	-16.6836	100000	150000
OY776071.1	3	0.502	0.484	1.28902	0.955773	0.018	10.7251	150000	200000
OY776071.1	4	0.225333	0.189333	1.20938	0.896721	0.036	21.4503	200000	250000
OY776071.1	5	0.161333	0.206667	0.857565	0.63586	-0.0453333	-27.0115	250000	300000
OY776071.1	6	0.391333	0.318	2.97338	2.20468	0.0733333	43.695	300000	350000
OY776071.1	7	0.441333	0.248	1.83897	1.36355	0.193333	115.196	350000	400000
OY776071.1	8	0.174	0.352	0.521163	0.386428	-0.178	-106.06	400000	450000
OY776071.1	9	0.696	0.507333	1.3914	1.03168	0.188667	112.415	450000	500000
OY776071.1	10	0.670667	0.632667	1.14356	0.847916	0.038	22.642	500000	550000
OY776071.1	11	0.576667	0.470667	1.31816	0.977376	0.106	63.1592	550000	600000
OY776071.1	12	0.354	0.312667	1.95177	1.44718	0.0413333	24.6281	600000	650000
OY776071.1	13	0.408	0.288	5.34912	3.96622	0.12	71.5009	650000	700000
OY776071.1	14	0.452	0.474	0.952935	0.706575	-0.022	-13.1085	700000	750000
OY776071.1	15	0.414667	0.492667	0.942521	0.698853	-0.078	-46.4756	750000	800000
OY776071.1	16	0.37	0.465333	0.813079	0.602875	-0.0953333	-56.8035	800000	850000
OY776071.1	17	0.0953333	0.224	0.923521	0.684765	-0.128667	-76.6649	850000	900000
OY776071.1	18	0.312667	0.286667	1.16985	0.867415	0.026	15.4919	900000	950000
OY776071.1	19	0.357333	0.280667	1.41789	1.05133	0.0766667	45.6811	950000	1000000
OY776071.1	20	0.332667	0.314	1.08626	0.805429	0.0186667	11.1224	1000000	1050000
OY776071.1	21	0.15	0.187333	0.97427	0.722394	-0.0373333	-22.2447	1050000	1100000
OY776071.1	22	0.0873333	0.0953333	2.21603	1.64313	-0.008	-4.76673	1100000	1150000
OY776071.1	23	0.127333	0.137333	0.988753	0.733133	-0.01	-5.95841	1150000	1200000
OY776071.1	24	0.124444	0.0955556	1.59735	1.18439	0.0288889	17.2132	1200000	1250000
OY776071.1	25	0.0614815	0.0651852	1.83214	1.35848	-0.0037037	-2.20682	1250000	1300000
OY776071.1	26	0.0725926	0.0637037	0.613979	0.455248	0.00888889	5.29637	1300000	1350000
OY776071.1	27	0.0822222	0.177037	0.744652	0.552139	-0.0948148	-56.4946	1350000	1400000
OY776071.1	28	0.154	0.185333	1.02741	0.761792	-0.0313333	-18.6697	1400000	1450000
OY776071.1	29	0.203704	0.176296	1.63683	1.21366	0.0274074	16.3305	1450000	1500000
OY776071.1	30	0.160667	0.224667	1.08377	0.803583	-0.064	-38.1338	1500000	1550000
OY776071.1	31	0.264	0.293333	1.17895	0.874161	-0.0293333	-17.478	1550000	1600000
OY776071.1	32	0.254667	0.312	0.845462	0.626886	-0.0573333	-34.1616	1600000	1650000
OY776071.1	33	0.133333	0.228148	0.664282	0.492547	-0.0948148	-56.4946	1650000	1700000
OY776071.1	34	0.340667	0.453333	0.802106	0.594739	-0.112667	-67.1314	1700000	1750000
OY776071.1	35	0.285333	0.387333	0.67286	0.498907	-0.102	-60.7758	1750000	1800000
OY776071.1	36	0.526	0.510667	1.09754	0.813796	0.0153333	9.13623	1800000	1850000
OY776071.1	37	0.503333	0.468	1.10704	0.820836	0.0353333	21.0531	1850000	1900000
OY776071.1	38	0.292	0.36	1.01958	0.755989	-0.068	-40.5172	1900000	1950000
OY776071.1	39	0.359333	0.385333	0.980636	0.727115	-0.026	-15.4919	1950000	2000000
OY776071.1	40	0.337037	0.297037	1.0728	0.79545	0.04	23.8336	2000000	2045000
OY776071.1	41	0.26	0.338667	0.849131	0.629607	-0.0786667	-46.8728	2050000	2100000
OY776071.1	42	0.394	0.331333	1.25653	0.93168	0.0626667	37.3394	2100000	2150000
OY776071.1	43	0.402	0.282667	1.77901	1.31908	0.119333	71.1037	2150000	2200000
OY776071.1	44	0.497333	0.442	1.457	1.08033	0.0553333	32.9699	2200000	2250000
OY776071.1	45	0.324667	0.313333	1.09672	0.813185	0.0113333	6.75287	2250000	2300000
OY776071.1	46	0.189333	0.135333	2.14488	1.59037	0.054	32.1754	2300000	2350000
OY776071.1	47	0.363333	0.228	2.00294	1.48513	0.135333	80.6372	2350000	2400000
OY776071.1	48	0.434667	0.217333	2.30308	1.70767	0.217333	129.496	2400000	2450000
OY776071.1	49	0.366667	0.156667	2.59068	1.92092	0.21	125.127	2450000	2500000
OY776071.1	50	0.282	0.158	1.97726	1.46608	0.124	73.8843	2500000	2550000
OY776071.1	51	0.252	0.200667	1.56343	1.15924	0.0513333	30.5865	2550000	2600000
OY776071.1	52	0.467333	0.267333	1.89528	1.4053	0.2	119.168	2600000	2650000
OY776071.1	53	0.322	0.2	2.00528	1.48686	0.122	72.6926	2650000	2700000
OY776071.1	54	0.120741	0.097037	1.31612	0.975863	0.0237037	14.1236	2705000	2750000
OY776071.1	55	0.208	0.223333	0.893638	0.662607	-0.0153333	-9.13623	2750000	2800000
OY776071.1	56	0.190667	0.19	0.892811	0.661995	0.000666667	0.397227	2800000	2850000
OY776071.1	57	0.556667	0.545333	1.1143	0.826224	0.0113333	6.75287	2850000	2900000
OY776071.1	58	0.190667	0.26	0.873857	0.647941	-0.0693333	-41.3116	2900000	2950000
OY776071.1	59	0.128	0.151333	1.14656	0.850145	-0.0233333	-13.903	2950000	3000000
OY776071.1	60	0.132667	0.214667	0.582204	0.431688	-0.082	-48.859	3000000	3050000
OY776071.1	61	0.127333	0.126667	0.814144	0.603665	0.000666667	0.397227	3050000	3100000
OY776071.1	62	0.0646667	0.112	1.39885	1.03721	-0.0473333	-28.2031	3100000	3150000
OY776071.1	63	0.153333	0.0841667	4.40613	3.26702	0.0691667	41.2123	3150000	3200000
OY776071.1	64	0.228667	0.174667	2.11304	1.56676	0.054	32.1754	3200000	3250000
OY776071.1	65	0.198667	0.0986667	4.61619	3.42278	0.1	59.5841	3250000	3300000
OY776071.1	66	0.48	0.462	1.15998	0.860095	0.018	10.7251	3300000	3350000
OY776071.1	67	0.134667	0.188667	1.28596	0.953506	-0.054	-32.1754	3350000	3400000
OY776071.1	68	0.197037	0.114815	3.2128	2.3822	0.0822222	48.9914	3400000	3445000
OY776071.1	69	0.218667	0.164	2.56724	1.90354	0.0546667	32.5726	3450000	3500000
OY776071.1	70	0.247407	0.0955556	9.93799	7.36874	0.151852	90.4796	3500000	3545000
OY776071.1	71	0.215556	0.191111	1.29143	0.957558	0.0244444	14.565	3555000	3600000
OY776071.1	72	0.102	0.08	2.28489	1.69418	0.022	13.1085	3600000	3650000
OY776071.1	73	0.111333	0.104	2.58628	1.91766	0.00733333	4.3695	3650000	3700000
OY776071.1	74	0.422	0.278	1.83802	1.36284	0.144	85.8011	3700000	3750000
OY776071.1	75	0.256667	0.457333	0.601774	0.446198	-0.200667	-119.565	3750000	3800000
OY776071.1	76	0.102963	0.142222	0.66248	0.49121	-0.0392593	-23.3923	3800000	3850000
OY776071.1	77	0.101111	0.132222	0.758994	0.562773	-0.0311111	-18.5373	3850000	3900000
OY776071.1	78	0.229333	0.3	0.861306	0.638634	-0.0706667	-42.1061	3900000	3950000
OY776071.1	79	0.508	0.483333	1.09392	0.811109	0.0246667	14.6974	3950000	4000000
OY776071.1	80	0.222667	0.409333	0.688772	0.510705	-0.186667	-111.224	4000000	4050000
OY776071.1	81	0.247333	0.257333	1.86187	1.38052	-0.01	-5.95841	4050000	4100000
OY776071.1	82	0.297333	0.189333	2.29099	1.69871	0.108	64.3508	4100000	4150000
OY776071.1	83	0.286	0.344	0.920813	0.682757	-0.058	-34.5588	4150000	4200000
OY776071.1	84	0.565333	0.553333	1.13884	0.844421	0.012	7.15009	4200000	4250000
OY776071.1	85	0.494286	0.430476	1.43496	1.06398	0.0638095	38.0203	4250000	4300000
OY776071.1	86	0.466	0.646	0.790498	0.586132	-0.18	-107.251	4300000	4350000
OY776071.1	87	0.584	0.286667	3.6938	2.73885	0.297333	177.163	4350000	4400000
OY776071.1	88	0.704	0.506667	1.37298	1.01802	0.197333	117.579	4400000	4450000
OY776071.1	89	0.503333	0.406667	1.29993	0.96386	0.0966667	57.598	4450000	4500000
OY776071.1	90	0.472667	0.326	6.90015	5.11627	0.146667	87.39	4500000	4550000
OY776071.1	91	0.338667	0.192	1.93027	1.43124	0.146667	87.39	4550000	4600000
OY776071.1	92	0.212	0.230667	1.27276	0.943717	-0.0186667	-11.1224	4600000	4650000
OY776071.1	93	0.538	0.484	5.34309	3.96176	0.054	32.1754	4650000	4700000
OY776071.1	94	0.35037	0.365926	0.839903	0.622764	-0.0155556	-9.26864	4700000	4745000
OY776071.1	95	0.364	0.302	1.22954	0.911672	0.062	36.9421	4750000	4800000
OY776071.1	96	0.471111	0.394074	1.21109	0.89799	0.077037	45.9018	4800000	4845000
OY776071.1	97	0.2125	0.224167	1.40997	1.04545	-0.0116667	-6.95148	4855000	4900000
OY776071.1	98	0.213333	0.242	1.09335	0.810688	-0.0286667	-17.0808	4900000	4950000
OY776071.1	99	0.470667	0.577333	0.842011	0.624327	-0.106667	-63.5564	4950000	5000000
OY776071.1	100	0.365333	0.424	0.979908	0.726575	-0.0586667	-34.956	5000000	5050000
OY776071.1	101	0.529333	0.536667	1.03937	0.770662	-0.00733333	-4.3695	5050000	5100000
OY776071.1	102	0.552	0.495333	1.21149	0.898283	0.0566667	33.7643	5100000	5150000
OY776071.1	103	0.574667	0.599333	0.933954	0.692501	-0.0246667	-14.6974	5150000	5200000
OY776071.1	104	0.230667	0.215333	1.16491	0.863746	0.0153333	9.13623	5200000	5250000
OY776071.1	105	0.0986667	0.086	1.41436	1.04871	0.0126667	7.54732	5250000	5300000
OY776071.1	106	0.162	0.164667	1.10501	0.819335	-0.00266667	-1.58891	5300000	5350000
OY776071.1	107	0.684	0.656	1.19626	0.88699	0.028	16.6836	5350000	5400000
OY776071.1	108	0.386	0.38	0.985864	0.73099	0.006	3.57505	5400000	5450000
OY776071.1	109	0.221333	0.192	1.43001	1.06032	0.0293333	17.478	5450000	5500000
OY776071.1	110	0.312	0.244667	1.66309	1.23314	0.0673333	40.12	5500000	5550000
OY776071.1	111	0.442667	0.349333	1.64087	1.21666	0.0933333	55.6118	5550000	5600000
OY776071.1	112	0.34	0.292667	1.65403	1.22641	0.0473333	28.2031	5600000	5650000
OY776071.1	113	0.29	0.315333	1.10969	0.822808	-0.0253333	-15.0946	5650000	5700000
OY776071.1	114	0.331333	0.309333	1.146	0.849724	0.022	13.1085	5700000	5750000
OY776071.1	115	0.465333	0.628667	0.675578	0.500922	-0.163333	-97.3207	5750000	5800000
OY776071.1	116	0.612667	0.645333	0.998464	0.740333	-0.0326667	-19.4641	5800000	5850000
OY776071.1	117	0.475333	0.520667	1.26646	0.939044	-0.0453333	-27.0115	5850000	5900000
OY776071.1	118	0.296296	0.252593	2.0813	1.54322	0.0437037	26.0405	5900000	5950000
OY776071.1	119	0.235333	0.179333	1.68377	1.24847	0.056	33.3671	5950000	6000000
OY776071.1	120	0.216	0.230667	0.929692	0.689341	-0.0146667	-8.739	6000000	6050000
OY776071.1	121	0.231333	0.192667	1.54899	1.14853	0.0386667	23.0392	6050000	6100000
OY776071.1	122	0.372	0.246667	2.36122	1.75078	0.125333	74.6787	6100000	6150000
OY776071.1	123	0.482667	0.350667	1.28983	0.956371	0.132	78.651	6150000	6200000
[truncated: 627 more rows]

## Sheet: Olob.difHeterozygosity.50000bp
chr	range	heterogametic	homogametic	ratio	ratio_scaled	diff	diff_scaled	start	end
CANNPT010000001.1	0	0.5475	0.515	1.71502	0.798897	0.0325	0.710127	0	50000
CANNPT010000001.1	1	0.423333	0.551111	0.800274	0.372786	-0.127778	-2.79195	50000	100000
CANNPT010000001.1	2	0.315556	0.355556	0.89412	0.416502	-0.04	-0.874002	100000	150000
CANNPT010000001.1	3	0.164	0.328	0.510728	0.237909	-0.164	-3.58341	150000	175000
OX382150.1	0	0.252	0.334	1.08294	0.504458	-0.082	-1.7917	0	50000
OX382150.1	1	0.472222	0.404444	1.19332	0.555876	0.0677778	1.48095	50000	95000
OX382150.1	2	0.233	0.146	2.53272	1.1798	0.087	1.90096	100000	150000
OX382150.1	3	0.314	0.178	3.5062	1.63327	0.136	2.97161	150000	200000
OX382150.1	4	0.262222	0.251111	2.23318	1.04027	0.0111111	0.242778	200000	245000
OX382150.1	5	0.128571	0.145714	1.02554	0.47772	-0.0171429	-0.374572	250000	300000
OX382150.1	6	0.63	0.5675	1.47128	0.685358	0.0625	1.36563	300000	350000
OX382150.1	7	0.432	0.288	4.94678	2.30433	0.144	3.14641	350000	400000
OX382150.1	8	0.271111	0.162222	3.71976	1.73275	0.108889	2.37923	400000	450000
OX382150.1	9	0.447143	0.297143	4.96646	2.31349	0.15	3.27751	450000	500000
OX382150.1	10	0.57	0.496	1.30512	0.607958	0.074	1.6169	500000	550000
OX382150.1	11	0.328889	0.293333	1.36466	0.635689	0.0355556	0.776891	550000	600000
OX382150.1	12	0.265556	0.188889	1.81161	0.84389	0.0766667	1.67517	605000	650000
OX382150.1	13	0.213	0.21	2.77636	1.29329	0.003	0.0655502	650000	700000
OX382150.1	14	0.37	0.373333	1.10849	0.516359	-0.00333333	-0.0728335	700000	750000
OX382150.1	15	0.662	0.542	1.4086	0.65616	0.12	2.62201	750000	800000
OX382150.1	16	0.399	0.386	2.71622	1.26528	0.013	0.284051	800000	850000
OX382150.1	17	0.503	0.598	0.96087	0.447596	-0.095	-2.07576	850000	900000
OX382150.1	18	0.367	0.318	3.64785	1.69925	0.049	1.07065	900000	950000
OX382150.1	19	0.28	0.0685714	3.87202	1.80368	0.211429	4.61973	955000	1000000
OX382150.1	20	0.481111	0.275556	4.74302	2.20941	0.205556	4.4914	1000000	1050000
OX382150.1	21	0.471	0.256	2.66935	1.24344	0.215	4.69776	1050000	1100000
OX382150.1	22	0.218571	0.114286	3.24405	1.51115	0.104286	2.27865	1100000	1140000
OX382150.1	23	0.1625	0.0425	6.375	2.96962	0.12	2.62201	1155000	1200000
OX382150.1	24	0.348	0.286	4.27904	1.99328	0.062	1.3547	1200000	1250000
OX382150.1	25	0.321	0.284	1.48668	0.692529	0.037	0.808452	1250000	1300000
OX382150.1	26	0.69	0.162857	5.00223	2.33016	0.527143	11.5181	1300000	1340000
OX382150.1	27	0.297143	0.188571	2.9369	1.36808	0.108571	2.37229	1350000	1385000
OX382150.1	28	0.384	0.172	6.95317	3.23895	0.212	4.63221	1400000	1450000
OX382150.1	29	0.281667	0.213333	4.18254	1.94833	0.0683333	1.49309	1450000	1500000
OX382150.1	30	0.28	0.211111	1.86816	0.870234	0.0688889	1.50523	1505000	1550000
OX382150.1	31	0.186667	0.0755556	3.136	1.46082	0.111111	2.42778	1550000	1600000
OX382150.1	32	0.276	0.296	1.07621	0.501325	-0.02	-0.437001	1600000	1650000
OX382150.1	33	0.3	0.238	1.45373	0.677182	0.062	1.3547	1650000	1700000
OX382150.1	34	0.437	0.422	1.18129	0.550274	0.015	0.327751	1700000	1750000
OX382150.1	35	0.251	0.3	0.999246	0.465472	-0.049	-1.07065	1750000	1800000
OX382150.1	36	0.279	0.236	1.89381	0.882181	0.043	0.939553	1800000	1850000
OX382150.1	37	0.555	0.415	3.78205	1.76177	0.14	3.05901	1850000	1900000
OX382150.1	38	0.605	0.48	4.54772	2.11844	0.125	2.73126	1900000	1950000
OX382150.1	39	0.488	0.286	7.85482	3.65896	0.202	4.41371	1950000	2000000
OX382150.1	40	0.566	0.464	1.3046	0.607712	0.102	2.22871	2000000	2050000
OX382150.1	41	0.5175	0.3775	3.17234	1.47775	0.14	3.05901	2050000	2100000
OX382150.1	42	0.416	0.254	3.39722	1.5825	0.162	3.53971	2100000	2150000
OX382150.1	43	0.385556	0.295556	2.34061	1.09031	0.09	1.96651	2150000	2200000
OX382150.1	44	0.47	0.684444	0.896293	0.417514	-0.214444	-4.68562	2200000	2245000
OX382150.1	45	0.421111	0.162222	6.03117	2.80946	0.258889	5.65674	2250000	2300000
OX382150.1	46	0.34125	0.2625	3.2527	1.51519	0.07875	1.72069	2300000	2350000
OX382150.1	47	0.716667	0.364444	1.99332	0.928534	0.352222	7.69608	2350000	2400000
OX382150.1	48	0.491667	0.316667	4.059	1.89078	0.175	3.82376	2400000	2450000
OX382150.1	49	0.543	0.168	6.93966	3.23266	0.375	8.19377	2450000	2500000
OX382150.1	50	0.42	0.288	2.69657	1.25613	0.132	2.88421	2500000	2550000
OX382150.1	51	0.387778	0.355556	2.45847	1.14521	0.0322222	0.704057	2550000	2600000
OX382150.1	52	0.275	0.296	1.02542	0.477666	-0.021	-0.458851	2600000	2650000
OX382150.1	53	0.187	0.268	1.62263	0.755859	-0.081	-1.76985	2650000	2700000
OX382150.1	54	0.412	0.372	1.31011	0.61028	0.04	0.874002	2700000	2750000
OX382150.1	55	0.243333	0.188889	2.97057	1.38376	0.0544444	1.18961	2750000	2800000
OX382150.1	56	0.447778	0.473333	0.970191	0.451938	-0.0255556	-0.55839	2800000	2850000
OX382150.1	57	0.49	0.248889	3.79223	1.76651	0.241111	5.26829	2850000	2900000
OX382150.1	58	0.611	0.402	1.8597	0.866294	0.209	4.56666	2900000	2950000
OX382150.1	59	0.665	0.524	1.3718	0.639016	0.141	3.08086	2950000	3000000
OX382150.1	60	0.688	0.712	1.02377	0.476894	-0.024	-0.524401	3000000	3050000
OX382150.1	61	0.487	0.2	3.84128	1.78936	0.287	6.27097	3050000	3100000
OX382150.1	62	0.872222	0.526667	8.12053	3.78273	0.345556	7.55041	3100000	3150000
OX382150.1	63	0.292222	0.155556	2.8322	1.31931	0.136667	2.98617	3150000	3200000
OX382150.1	64	0.958	0.89	1.05341	0.490701	0.068	1.4858	3200000	3250000
OX382150.1	65	0.4875	0.5	1.34363	0.625895	-0.0125	-0.273126	3250000	3300000
OX382150.1	66	0.536	0.382	1.64538	0.766456	0.154	3.36491	3300000	3350000
OX382150.1	67	0.817	0.75	1.76145	0.820527	0.067	1.46395	3350000	3400000
OX382150.1	68	0.481	0.464	1.36879	0.637615	0.017	0.371451	3400000	3450000
OX382150.1	69	0.585556	0.644444	0.957457	0.446006	-0.0588889	-1.28673	3450000	3495000
OX382150.1	70	0.2225	0.125	2.29669	1.06985	0.0975	2.13038	3500000	3540000
OX382150.1	71	0.164286	0.234286	0.542217	0.252578	-0.07	-1.5295	3550000	3595000
OX382150.1	72	0.379	0.482	1.33034	0.619704	-0.103	-2.25056	3600000	3650000
OX382150.1	73	0.4	0.374	1.30464	0.60773	0.026	0.568102	3650000	3700000
OX382150.1	74	0.661	0.482	1.43073	0.666469	0.179	3.91116	3700000	3750000
OX382150.1	75	0.697	0.808	1.30646	0.608579	-0.111	-2.42536	3750000	3800000
OX382150.1	76	0.486	0.532	1.37827	0.642033	-0.046	-1.0051	3800000	3850000
OX382150.1	77	0.3	0.348	0.930365	0.433386	-0.048	-1.0488	3850000	3900000
OX382150.1	78	0.259	0.218	1.34492	0.626497	0.041	0.895852	3900000	3950000
OX382150.1	79	0.26	0.326	1.68094	0.783021	-0.066	-1.4421	3950000	4000000
OX382150.1	80	0.68	0.45	1.74973	0.815063	0.23	5.02551	4000000	4050000
OX382150.1	81	0.51875	0.38	4.9457	2.30382	0.13875	3.0317	4050000	4100000
OX382150.1	82	0.398	0.346	1.12306	0.523149	0.052	1.1362	4100000	4150000
OX382150.1	83	0.391111	0.291111	1.1887	0.553722	0.1	2.18501	4150000	4200000
OX382150.1	84	0.302	0.174	1.85667	0.864879	0.128	2.79681	4200000	4250000
OX382150.1	85	0.371429	0.142857	4.58823	2.13731	0.228571	4.9943	4250000	4300000
OX382150.1	86	0.904286	0.322857	5.47254	2.54924	0.581429	12.7042	4305000	4350000
OX382150.1	87	0.58875	0.3175	4.27608	1.9919	0.27125	5.92683	4350000	4400000
OX382150.1	88	0.37	0.188889	2.47994	1.15521	0.181111	3.95729	4400000	4450000
OX382150.1	89	0.219	0.406	0.698772	0.325504	-0.187	-4.08596	4450000	4500000
OX382150.1	90	0.681	0.592	1.29822	0.60474	0.089	1.94466	4500000	4550000
OX382150.1	91	0.371	0.43	1.45706	0.678733	-0.059	-1.28915	4550000	4600000
OX382150.1	92	0.213333	0.175556	1.46516	0.682506	0.0377778	0.825447	4600000	4650000
OX382150.1	93	0.205	0.08	4.93125	2.29709	0.125	2.73126	4650000	4690000
OX382150.1	94	0.357778	0.288889	1.00836	0.469717	0.0688889	1.50523	4700000	4750000
OX382150.1	95	0.51	0.44	2.60327	1.21267	0.07	1.5295	4750000	4800000
OX382150.1	96	0.525	0.352	2.62199	1.22139	0.173	3.78006	4800000	4850000
OX382150.1	97	0.641	0.692	1.00824	0.469662	-0.051	-1.11435	4850000	4900000
OX382150.1	98	0.524	0.452	1.58534	0.738486	0.072	1.5732	4900000	4950000
OX382150.1	99	0.75125	0.6325	1.39737	0.650926	0.11875	2.59469	4950000	5000000
OX382150.1	100	0.36375	0.235	2.47988	1.15519	0.12875	2.8132	5005000	5050000
OX382150.1	101	0.532	0.496	1.28782	0.599897	0.036	0.786602	5050000	5100000
OX382150.1	102	0.433	0.216	6.70861	3.12503	0.217	4.74146	5100000	5150000
OX382150.1	103	0.734	0.692	1.20837	0.562888	0.042	0.917702	5150000	5200000
OX382150.1	104	0.883	0.754	1.1296	0.526195	0.129	2.81866	5200000	5250000
OX382150.1	105	0.337778	0.231111	1.77786	0.828167	0.106667	2.33067	5255000	5300000
OX382150.1	106	0.733	0.738	0.95187	0.443404	-0.005	-0.10925	5300000	5350000
OX382150.1	107	0.349	0.272	1.29191	0.601803	0.077	1.68245	5350000	5400000
OX382150.1	108	0.375	0.35	1.39492	0.649785	0.025	0.546251	5400000	5450000
OX382150.1	109	0.722222	0.504444	1.63638	0.762266	0.217778	4.75846	5455000	5500000
OX382150.1	110	0.458	0.388	7.22651	3.36628	0.07	1.5295	5500000	5550000
OX382150.1	111	0.372	0.378	1.04912	0.488707	-0.006	-0.1311	5550000	5600000
OX382150.1	112	0.582	0.368	3.64417	1.69754	0.214	4.67591	5600000	5650000
OX382150.1	113	1.024	0.62	1.8731	0.872534	0.404	8.82742	5650000	5700000
OX382150.1	114	1.151	0.756	5.26978	2.45479	0.395	8.63077	5700000	5750000
OX382150.1	115	0.552222	0.54	1.04165	0.485226	0.0122222	0.267056	5750000	5795000
OX382150.1	116	0.332	0.174	5.25024	2.44568	0.158	3.45231	5800000	5850000
OX382150.1	117	0.262222	0.282222	1.04886	0.488585	-0.02	-0.437001	5850000	5900000
OX382150.1	118	0.414444	0.326667	2.24054	1.04369	0.0877778	1.91795	5900000	5950000
OX382150.1	119	0.41	0.42	1.47272	0.686026	-0.01	-0.218501	5950000	6000000
OX382150.1	120	0.269	0.262	1.7661	0.822693	0.007	0.15295	6000000	6050000
OX382150.1	121	0.471	0.352	1.57833	0.735225	0.119	2.60016	6050000	6100000
OX382150.1	122	0.453	0.456	1.48759	0.692957	-0.003	-0.0655502	6100000	6150000
OX382150.1	123	0.432	0.356	1.79719	0.837173	0.076	1.6606	6150000	6200000
OX382150.1	124	0.707	0.826	1.3212	0.615445	-0.119	-2.60016	6200000	6250000
OX382150.1	125	0.399	0.224	3.19534	1.48847	0.175	3.82376	6250000	6300000
OX382150.1	126	0.567778	0.488889	1.22301	0.569707	0.0788889	1.72373	6300000	6350000
OX382150.1	127	0.672222	0.704444	1.07966	0.502933	-0.0322222	-0.704057	6350000	6400000
OX382150.1	128	0.27375	0.3075	0.777761	0.362299	-0.03375	-0.737439	6400000	6450000
OX382150.1	129	0.28625	0.5925	3.79016	1.76554	-0.30625	-6.69158	6450000	6500000
OX382150.1	130	0.436	0.454	1.05062	0.489404	-0.018	-0.393301	6500000	6550000
OX382150.1	131	0.352222	0.293333	1.6412	0.764507	0.0588889	1.28673	6550000	6600000
OX382150.1	132	0.221111	0.117778	2.34031	1.09017	0.103333	2.25784	6600000	6650000
OX382150.1	133	0.25875	0.1925	1.20958	0.563453	0.06625	1.44757	6650000	6700000
OX382150.1	134	0.56	0.524	1.11891	0.521213	0.036	0.786602	6700000	6750000
OX382150.1	135	0.49125	0.36	2.54747	1.18667	0.13125	2.86782	6750000	6800000
OX382150.1	136	0.636	0.456	1.75916	0.819456	0.18	3.93301	6800000	6850000
OX382150.1	137	0.432	0.332	2.02164	0.941727	0.1	2.18501	6850000	6900000
OX382150.1	138	0.358	0.406	0.986087	0.459342	-0.048	-1.0488	6900000	6950000
OX382150.1	139	0.386	0.384	1.01236	0.47158	0.002	0.0437001	6950000	7000000
OX382150.1	140	0.419	0.526	0.876099	0.408108	-0.107	-2.33796	7000000	7050000
OX382150.1	141	0.465	0.574	0.857961	0.399659	-0.109	-2.38166	7050000	7100000
OX382150.1	142	0.696	0.576	1.37644	0.641177	0.12	2.62201	7100000	7150000
OX382150.1	143	0.768	0.806	1.10861	0.516417	-0.038	-0.830302	7150000	7200000
OX382150.1	144	0.845	0.83	1.13646	0.529389	0.015	0.327751	7200000	7250000
OX382150.1	145	0.483333	0.322222	1.77032	0.824657	0.161111	3.52029	7250000	7300000
OX382150.1	146	0.506	0.326	2.41824	1.12647	0.18	3.93301	7300000	7350000
OX382150.1	147	0.98	0.955556	1.00095	0.466268	0.0244444	0.534113	7350000	7395000
OX382151.1	0	0.287	0.2	1.82426	0.849783	0.087	1.90096	0	50000
OX382151.1	1	0.489	0.414	7.4358	3.46377	0.075	1.63875	50000	100000
OX382151.1	2	0.442	0.336	4.05234	1.88768	0.106	2.31611	100000	150000
OX382151.1	3	0.249	0.2	2.22005	1.03415	0.049	1.07065	150000	200000
OX382151.1	4	0.463	0.234	5.55268	2.58657	0.229	5.00366	200000	250000
OX382151.1	5	0.368889	0.242222	3.93966	1.83519	0.126667	2.76767	255000	300000
OX382151.1	6	0.322	0.218	2.62097	1.22091	0.104	2.27241	300000	350000
OX382151.1	7	0.224	0.252	1.209	0.56318	-0.028	-0.611802	350000	400000
OX382151.1	8	0.225714	0.0914286	3.60544	1.6795	0.134286	2.93415	400000	445000
OX382151.1	9	0.358	0.136	5.92556	2.76026	0.222	4.85071	460000	500000
OX382151.1	10	0.15125	0.1225	1.78095	0.829608	0.02875	0.628189	505000	550000
OX382151.1	11	0.265	0.045	5.9375	2.76583	0.22	4.80701	550000	580000
OX382151.1	12	0.35	0.243333	3.24722	1.51263	0.106667	2.33067	605000	650000
OX382151.1	13	0.298	0.104	6.27667	2.92382	0.194	4.23891	650000	700000
OX382151.1	14	0.302	0.26	2.6725	1.24491	0.042	0.917702	700000	750000
OX382151.1	15	0.138	0.146	1.22193	0.569205	-0.008	-0.1748	750000	800000
OX382151.1	16	0.126667	0.166667	1.73627	0.808797	-0.04	-0.874002	800000	835000
OX382151.1	17	0.362	0.324	1.26159	0.587677	0.038	0.830302	850000	900000
OX382151.1	18	0.268	0.534	0.637802	0.297103	-0.266	-5.81212	900000	950000
OX382151.1	19	0.24	0.111111	3.68454	1.71635	0.128889	2.81623	950000	1000000
OX382151.1	20	0.19	0.231429	2.45041	1.14146	-0.0414286	-0.905217	1000000	1045000
OX382151.1	21	0.63875	0.5525	1.69727	0.790629	0.08625	1.88457	1050000	1090000
OX382151.1	22	0.328	0.192	4.68015	2.18012	0.136	2.97161	1100000	1150000
OX382151.1	23	0.388889	0.375556	1.43245	0.667267	0.0133333	0.291334	1150000	1195000
OX382151.1	24	0.285	0.356	2.07822	0.968082	-0.071	-1.55135	1200000	1250000
OX382151.1	25	0.378	0.242	2.50508	1.16692	0.136	2.97161	1250000	1300000
OX382151.1	26	0.19125	0.335	0.624952	0.291117	-0.14375	-3.14095	1300000	1350000
OX382151.1	27	0.49875	0.2125	4.71037	2.1942	0.28625	6.25458	1350000	1400000
OX382151.1	28	0.5	0.41	2.27147	1.0581	0.09	1.96651	1400000	1450000
OX382151.1	29	1.12778	0.897778	5.11418	2.38231	0.23	5.02551	1450000	1495000
OX382151.1	30	0.625	0.434	2.63934	1.22947	0.191	4.17336	1500000	1550000
OX382151.1	31	0.733	0.948	0.8011	0.373171	-0.215	-4.69776	1550000	1600000
OX382151.1	32	0.669	0.694	1.00874	0.469896	-0.025	-0.546251	1600000	1650000
OX382151.1	33	0.4875	0.2975	3.64027	1.69572	0.19	4.15151	1650000	1700000
OX382151.1	34	0.348	0.344	1.73509	0.808246	0.004	0.0874002	1700000	1750000
OX382151.1	35	0.789	0.82	1.08035	0.50325	-0.031	-0.677352	1750000	1800000
OX382151.1	36	0.57	0.818	0.682762	0.318046	-0.248	-5.41881	1800000	1850000
OX382151.1	37	0.264	0.272	0.777051	0.361969	-0.008	-0.1748	1850000	1900000
OX382151.1	38	0.025	0.035	0.84375	0.393039	-0.01	-0.218501	1900000	1950000
OX382151.1	39	0.132222	0.164444	1.39921	0.651783	-0.0322222	-0.704057	1955000	2000000
OX382151.1	40	0.278	0.356	1.53247	0.713862	-0.078	-1.7043	2000000	2050000
OX382151.1	41	0.263333	0.32	1.26485	0.589199	-0.0566667	-1.23817	2050000	2100000
OX382151.1	42	0.282	0.41	0.697733	0.325021	-0.128	-2.79681	2100000	2150000
OX382151.1	43	0.04	0.092	0.310308	0.144549	-0.052	-1.1362	2150000	2200000
OX382151.1	44	0.287778	0.253333	2.10089	0.978642	0.0344444	0.752613	2200000	2250000
OX382151.1	45	0.24625	0.1625	4.35751	2.02983	0.08375	1.82994	2250000	2295000
OX382151.1	46	0.48625	0.165	12.0989	5.63593	0.32125	7.01933	2305000	2350000
OX382151.1	47	0.468	0.596	0.886989	0.41318	-0.128	-2.79681	2350000	2400000
OX382151.1	48	0.478571	0.225714	9.71288	4.52449	0.252857	5.52494	2405000	2450000
OX382151.1	49	0.345	0.396667	0.89583	0.417299	-0.0516667	-1.12892	2450000	2495000
OX382151.1	50	0.334	0.276	2.33204	1.08632	0.058	1.2673	2500000	2550000
OX382151.1	51	0.451	0.324	4.01245	1.86909	0.127	2.77496	2550000	2600000
OX382151.1	52	0.317	0.298	1.36628	0.636445	0.019	0.415151	2600000	2650000
OX382151.1	53	0.47375	0.4325	1.71958	0.801021	0.04125	0.901315	2650000	2690000
OX382151.1	54	0.164444	0.204444	1.30123	0.606146	-0.04	-0.874002	2700000	2750000
OX382151.1	55	0.291111	0.217778	2.52886	1.178	0.0733333	1.60234	2750000	2800000
OX382151.1	56	0.232222	0.271111	1.94829	0.907557	-0.0388889	-0.849725	2800000	2850000
OX382151.1	57	0.272857	0.2	6.48992	3.02316	0.0728571	1.59193	2850000	2895000
OX382151.1	58	0.2725	0.2125	1.49583	0.696793	0.06	1.311	2910000	2950000
OX382151.1	59	0.15	0.195556	1.06701	0.497038	-0.0455556	-0.995392	2950000	3000000
OX382151.1	60	0.075	0.108	0.684484	0.318849	-0.033	-0.721052	3000000	3050000
OX382151.1	61	0.168571	0.245714	0.542819	0.252858	-0.0771429	-1.68558	3050000	3100000
OX382151.1	62	0.253	0.172	4.962	2.31142	0.081	1.76985	3100000	3150000
OX382151.1	63	0.274	0.294	1.97109	0.918179	-0.02	-0.437001	3150000	3200000
OX382151.1	64	0.23	0.342222	3.61392	1.68345	-0.112222	-2.45206	3200000	3250000
OX382151.1	65	0.28	0.18	2.08224	0.969957	0.1	2.18501	3250000	3300000
OX382151.1	66	0.419	0.3	3.29946	1.53697	0.119	2.60016	3300000	3350000
OX382151.1	67	0.31	0.242	2.02066	0.941271	0.068	1.4858	3350000	3400000
OX382151.1	68	0.312222	0.46	0.794004	0.369866	-0.147778	-3.22895	3400000	3450000
OX382151.1	69	0.164444	0.197778	1.39514	0.649887	-0.0333333	-0.728335	3450000	3500000
OX382151.1	70	0.391	0.478	1.12156	0.522447	-0.087	-1.90096	3500000	3550000
OX382151.1	71	0.402222	0.195556	3.6076	1.68051	0.206667	4.51568	3550000	3600000
OX382151.1	72	0.24875	0.23	3.72777	1.73648	0.01875	0.409689	3600000	3650000
OX382151.1	73	0.367	0.508	1.05998	0.493764	-0.141	-3.08086	3650000	3700000
OX382151.1	74	0.315	0.3025	4.49235	2.09264	0.0125	0.273126	3700000	3750000
OX382151.1	75	0.317	0.314	1.63768	0.762871	0.003	0.0655502	3750000	3800000
OX382151.1	76	0.571	0.428	1.84503	0.859457	0.143	3.12456	3800000	3850000
OX382151.1	77	0.41	0.248889	1.67003	0.777941	0.161111	3.52029	3850000	3900000
OX382151.1	78	0.47	0.184444	4.16594	1.94059	0.285556	6.23941	3900000	3945000
OX382151.1	79	0.643	0.256	3.94618	1.83822	0.387	8.45597	3950000	4000000
OX382151.1	80	0.523	0.464	1.51082	0.703773	0.059	1.28915	4000000	4050000
OX382151.1	81	0.305	0.1725	6.12202	2.85178	0.1325	2.89513	4050000	4100000
OX382151.1	82	0.25	0.405	0.485043	0.225944	-0.155	-3.38676	4100000	4120000
OX382152.1	0	0.23	0.116667	2.25556	1.05069	0.113333	2.47634	0	50000
OX382152.1	1	0.309	0.31	1.13683	0.529562	-0.001	-0.0218501	50000	100000
OX382152.1	2	0.389	0.3	1.42806	0.665223	0.089	1.94466	100000	150000
OX382152.1	3	0.451	0.318	1.52962	0.712531	0.133	2.90606	150000	200000
OX382152.1	4	0.529	0.234	3.64369	1.69732	0.295	6.44577	200000	250000
OX382152.1	5	0.66	0.433333	2.76299	1.28707	0.226667	4.95268	250000	300000
OX382152.1	6	0.268889	0.173333	4.35907	2.03056	0.0955556	2.08789	300000	350000
OX382152.1	7	0.283	0.212	1.99085	0.927386	0.071	1.55135	350000	400000
OX382152.1	8	0.287	0.282	1.99347	0.928606	0.005	0.10925	400000	450000
OX382152.1	9	0.42	0.243333	4.57056	2.12907	0.176667	3.86018	450000	480000
OX382152.1	10	0.31	0.26	1.69022	0.787344	0.05	1.0925	500000	550000
OX382152.1	11	0.3225	0.1975	2.08468	0.971095	0.125	2.73126	555000	595000
OX382152.1	12	0.204	0.186	1.22226	0.569359	0.018	0.393301	600000	650000
OX382152.1	13	0.12625	0.095	2.17094	1.01127	0.03125	0.682814	650000	700000
OX382152.1	14	0.234	0.166	5.03885	2.34722	0.068	1.4858	700000	750000
OX382152.1	15	0.196	0.24	0.84092	0.39172	-0.044	-0.961403	750000	800000
OX382152.1	16	0.255	0.234	2.18237	1.0166	0.021	0.458851	800000	850000
OX382152.1	17	0.354	0.324	1.07492	0.500725	0.03	0.655502	850000	900000
OX382152.1	18	0.075	0.222	0.387946	0.180715	-0.147	-3.21196	900000	950000
OX382152.1	19	0.163	0.17	1.22516	0.570708	-0.007	-0.15295	950000	1000000
OX382152.1	20	0.488	0.394	2.62788	1.22413	0.094	2.05391	1000000	1050000
OX382152.1	21	0.413	0.334	1.65992	0.77323	0.079	1.72615	1050000	1100000
OX382152.1	22	0.113333	0.188889	0.650734	0.303127	-0.0755556	-1.65089	1100000	1150000
OX382152.1	23	0.318889	0.24	3.27023	1.52335	0.0788889	1.72373	1150000	1200000
OX382152.1	24	0.249	0.218	1.77243	0.825638	0.031	0.677352	1200000	1250000
OX382152.1	25	0.231	0.488	0.645464	0.300672	-0.257	-5.61547	1250000	1300000
OX382152.1	26	0.433333	0.415556	1.2446	0.579766	0.0177778	0.388445	1300000	1350000
OX382152.1	27	0.446	0.384	1.42184	0.662325	0.062	1.3547	1350000	1400000
OX382152.1	28	0.296667	0.186667	1.94778	0.907321	0.11	2.40351	1400000	1450000
OX382152.1	29	0.252857	0.111429	7.43095	3.46151	0.141429	3.09022	1450000	1500000
OX382152.1	30	0.599	0.58	1.75091	0.815617	0.019	0.415151	1500000	1550000
OX382152.1	31	0.275	0.402	0.714248	0.332713	-0.127	-2.77496	1550000	1600000
OX382152.1	32	0.26125	0.2625	0.997849	0.464822	-0.00125	-0.0273126	1600000	1650000
OX382152.1	33	0.417	0.512	0.823504	0.383608	-0.095	-2.07576	1650000	1700000
OX382152.1	34	0.566	0.388	1.68879	0.78668	0.178	3.88931	1700000	1750000
OX382152.1	35	0.55	0.315556	4.62051	2.15234	0.234444	5.12262	1750000	1800000
OX382152.1	36	0.717	0.592	2.13094	0.99264	0.125	2.73126	1800000	1850000
OX382152.1	37	0.316667	0.24	4.43949	2.06802	0.0766667	1.67517	1850000	1895000
OX382152.1	38	0.152222	0.142222	2.34841	1.09395	0.01	0.218501	1905000	1950000
OX382152.1	39	0.766667	0.708889	1.65771	0.7722	0.0577778	1.26245	1950000	2000000
OX382152.1	40	0.417778	0.4	1.40287	0.653489	0.0177778	0.388445	2000000	2050000
OX382152.1	41	0.263	0.452	0.544176	0.25349	-0.189	-4.12966	2050000	2100000
OX382152.1	42	0.179	0.142	1.95938	0.912723	0.037	0.808452	2100000	2150000
OX382152.1	43	0.214	0.26	1.13543	0.528909	-0.046	-1.0051	2150000	2200000
OX382152.1	44	0.1925	0.2375	2.57244	1.1983	-0.045	-0.983253	2200000	2250000
OX382152.1	45	0.188	0.152	1.26542	0.589461	0.036	0.786602	2250000	2300000
OX382152.1	46	0.1	0.0771429	1.92857	0.898374	0.0228571	0.49943	2300000	2350000
OX382152.1	47	0.152222	0.186667	0.970801	0.452222	-0.0344444	-0.752613	2355000	2400000
OX382152.1	48	0.56875	0.835	1.4284	0.665381	-0.26625	-5.81758	2400000	2445000
OX382152.1	49	0.354444	0.166667	4.68099	2.18052	0.187778	4.10296	2450000	2500000
OX382152.1	50	0.293333	0.206667	1.41883	0.660925	0.0866667	1.89367	2525000	2550000
OX382152.1	51	0.005	0.01	0.25	0.116456	-0.005	-0.10925	2580000	2590000
OX382152.1	52	0.2575	0.09	2.58958	1.20629	0.1675	3.65988	2615000	2635000
OX382152.1	53	0.388	0.26	5.40985	2.52003	0.128	2.79681	2660000	2700000
OX382152.1	54	0.198	0.248	1.24879	0.581713	-0.05	-1.0925	2700000	2750000
OX382152.1	55	0.347143	0.297143	2.49981	1.16447	0.05	1.0925	2750000	2800000
OX382152.1	56	0.31	0.268889	1.38124	0.643414	0.0411111	0.89828	2800000	2845000
OX382152.1	57	0.343333	0.206667	3.18851	1.48528	0.136667	2.98617	2850000	2895000
OX382152.1	58	0.116	0.112	1.94571	0.906356	0.004	0.0874002	2900000	2950000
OX382152.1	59	0.203	0.3	1.26445	0.589013	-0.097	-2.11946	2950000	3000000
OX382152.1	60	0.188889	0.195556	1.66035	0.773432	-0.00666667	-0.145667	3000000	3050000
OX382152.1	61	0.258	0.268	1.04274	0.485731	-0.01	-0.218501	3050000	3100000
OX382152.1	62	0.23375	0.2925	0.912046	0.424852	-0.05875	-1.28369	3100000	3140000
OX382152.1	63	0.288571	0.188571	3.57611	1.66584	0.1	2.18501	3165000	3200000
OX382152.1	64	0.245	0.05	5.46944	2.5478	0.195	4.26076	3200000	3245000
OX382152.1	65	0.18	0.182222	1.98366	0.924037	-0.00222222	-0.0485557	3250000	3300000
OX382152.1	66	0.212	0.144	1.91474	0.89193	0.068	1.4858	3300000	3350000
OX382152.1	67	0.302	0.232	1.75703	0.818465	0.07	1.5295	3350000	3400000
OX382152.1	68	0.358	0.32	1.245	0.579951	0.038	0.830302	3400000	3450000
OX382152.1	69	0.132	0.148	0.96369	0.44891	-0.016	-0.349601	3450000	3500000
OX382152.1	70	0.188	0.152	2.15433	1.00354	0.036	0.786602	3500000	3550000
OX382152.1	71	0.30375	0.2775	2.10666	0.981332	0.02625	0.573564	3550000	3600000
OX382152.1	72	0.1475	0.195	2.00128	0.932243	-0.0475	-1.03788	3600000	3650000
OX382152.1	73	0.306	0.26	1.6191	0.754216	0.046	1.0051	3650000	3700000
OX382152.1	74	0.26	0.15	3.92817	1.82984	0.11	2.40351	3700000	3750000
OX382152.1	75	0.217	0.164	1.60775	0.748928	0.053	1.15805	3750000	3800000
OX382152.1	76	0.289	0.294	1.081	0.503557	-0.005	-0.10925	3800000	3850000
OX382152.1	77	0.326	0.234	1.83449	0.854548	0.092	2.01021	3850000	3900000
OX382152.1	78	0.318	0.158	9.08336	4.23124	0.16	3.49601	3900000	3950000
OX382152.1	79	0.172	0.104	5.64211	2.62823	0.068	1.4858	3955000	4000000
OX382153.1	0	0.216667	0.164444	4.55495	2.1218	0.0522222	1.14106	0	50000
OX382153.1	1	0.201	0.296	0.886534	0.412968	-0.095	-2.07576	50000	100000
OX382153.1	2	0.195556	0.164444	1.76277	0.821138	0.0311111	0.67978	100000	145000
OX382153.1	3	0.262	0.272	1.11984	0.521648	-0.01	-0.218501	150000	200000
OX382153.1	4	0.256	0.182	2.56905	1.19672	0.074	1.6169	200000	250000
OX382153.1	5	0.16625	0.0825	3.50565	1.63302	0.08375	1.82994	260000	300000
OX382153.1	6	0.187778	0.208889	1.2627	0.588195	-0.0211111	-0.461279	300000	350000
OX382153.1	7	0.21	0.206	2.04099	0.950739	0.004	0.0874002	350000	400000
OX382153.1	8	0.27	0.21	2.6453	1.23224	0.06	1.311	400000	450000
OX382153.1	9	0.14625	0.1525	1.3093	0.609903	-0.00625	-0.136563	450000	500000
OX382153.1	10	0.523	0.476	1.09854	0.511727	0.047	1.02695	500000	550000
OX382153.1	11	0.361111	0.268889	2.26454	1.05488	0.0922222	2.01506	555000	600000
OX382153.1	12	0.35	0.298	1.3652	0.63594	0.052	1.1362	600000	650000
OX382153.1	13	0.292	0.26	1.25029	0.582415	0.032	0.699202	650000	700000
OX382153.1	14	0.048	0.09	1.28292	0.597613	-0.042	-0.917702	700000	750000
OX382153.1	15	0.21	0.204	3.24012	1.50932	0.006	0.1311	750000	800000
OX382153.1	16	0.424444	0.368889	1.50056	0.698994	0.0555556	1.21389	800000	850000
OX382153.1	17	0.2375	0.115	4.47139	2.08288	0.1225	2.67663	850000	900000
OX382153.1	18	0.368889	0.44	1.60944	0.749714	-0.0711111	-1.55378	900000	950000
OX382153.1	19	0.193	0.22	0.892305	0.415657	-0.027	-0.589952	950000	1000000
OX382153.1	20	0.225	0.178	1.62578	0.757328	0.047	1.02695	1000000	1050000
OX382153.1	21	0.134444	0.131111	1.29081	0.601288	0.00333333	0.0728335	1050000	1100000
OX382153.1	22	0.297778	0.2	2.14974	1.0014	0.0977778	2.13645	1100000	1150000
OX382153.1	23	0.248889	0.255556	1.44142	0.671449	-0.00666667	-0.145667	1155000	1200000
OX382153.1	24	0.322	0.272	1.76904	0.824059	0.05	1.0925	1200000	1225000
OX382153.1	25	0.405	0.443333	0.857728	0.39955	-0.0383333	-0.837586	1255000	1300000
OX382153.1	26	0.0666667	0.02	2.02083	0.941352	0.0466667	1.01967	1300000	1345000
OX382153.1	27	0.47875	0.4975	0.985591	0.459111	-0.01875	-0.409689	1350000	1400000
OX382153.1	28	0.451429	0.368571	1.21733	0.567062	0.0828571	1.81043	1400000	1450000
OX382153.1	29	0.475556	0.468889	0.875236	0.407705	0.00666667	0.145667	1450000	1495000
OX382153.1	30	0.2475	0.295	1.36368	0.635235	-0.0475	-1.03788	1505000	1540000
OX382153.1	31	0.198	0.1	4.26286	1.98574	0.098	2.14131	1550000	1595000
OX382153.1	32	0.5725	0.375	6.21848	2.89671	0.1975	4.31539	1600000	1650000
OX382153.1	33	0.152222	0.144444	1.00029	0.465959	0.00777778	0.169945	1650000	1695000
OX382153.1	34	0.3225	0.05	6.77083	3.15401	0.2725	5.95414	1710000	1745000
OX382153.1	35	0.15	0.06	2.5	1.16456	0.09	1.96651	1785000	1790000
OX382153.1	37	0.371	0.406	1.96579	0.915709	-0.035	-0.764752	1850000	1900000
OX382153.1	38	0.222	0.266	0.82384	0.383764	-0.044	-0.961403	1900000	1950000
OX382153.1	39	0.148	0.194	1.17554	0.547596	-0.046	-1.0051	1950000	2000000
OX382153.1	40	0.215556	0.157778	1.52524	0.710491	0.0577778	1.26245	2000000	2050000
OX382153.1	41	0.201429	0.291429	2.1685	1.01014	-0.09	-1.96651	2050000	2095000
OX382153.1	43	0.165	0.08	3.45833	1.61097	0.085	1.85726	2165000	2175000
OX382153.1	44	0.2475	0.095	5.02708	2.34173	0.1525	3.33213	2210000	2250000
OX382153.1	45	0.0955556	0.106667	1.52751	0.711552	-0.0111111	-0.242778	2250000	2300000
OX382153.1	46	0.226667	0.15	4.08418	1.9025	0.0766667	1.67517	2300000	2350000
OX382153.1	47	0.432	0.416	1.11109	0.517573	0.016	0.349601	2350000	2400000
OX382153.1	48	0.15375	0.1675	1.56414	0.728612	-0.01375	-0.300438	2410000	2450000
OX382153.1	49	0.193	0.224	1.21696	0.566889	-0.031	-0.677352	2450000	2500000
OX382153.1	50	0.0477778	0.146667	0.979154	0.456113	-0.0988889	-2.16073	2500000	2550000
OX382153.1	51	0.114444	0.144444	1.08272	0.504355	-0.03	-0.655502	2550000	2600000
OX382153.1	52	0.352857	0.371429	1.09175	0.508565	-0.0185714	-0.405787	2600000	2645000
OX382153.1	53	0.15875	0.0875	4.63194	2.15767	0.07125	1.55682	2655000	2700000
OX382153.1	54	0.132	0.178	1.24425	0.5796	-0.046	-1.0051	2700000	2750000
OX382153.1	55	0.1625	0.13	1.25688	0.585483	0.0325	0.710127	2750000	2800000
OX382153.1	56	0.166667	0.0833333	1.96032	0.913162	0.0833333	1.82084	2800000	2850000
OX382153.1	57	0.158	0.14	1.40372	0.653885	0.018	0.393301	2850000	2900000
OX382153.1	58	0.218	0.224	1.08654	0.506138	-0.006	-0.1311	2900000	2950000
OX382153.1	59	0.184	0.116	4.1625	1.93899	0.068	1.4858	2950000	3000000
OX382153.1	60	0.134444	0.406667	0.714779	0.332961	-0.272222	-5.94807	3005000	3050000
OX382153.1	61	0.176	0.222	0.7404	0.344896	-0.046	-1.0051	3050000	3100000
OX382153.1	62	0.085	0.268	0.320859	0.149464	-0.183	-3.99856	3100000	3150000
OX382153.1	63	0.06	0.197778	0.634575	0.2956	-0.137778	-3.01045	3150000	3200000
OX382153.1	64	0.213	0.164	1.94104	0.904182	0.049	1.07065	3200000	3250000
OX382153.1	65	0.582222	0.444444	1.3483	0.628069	0.137778	3.01045	3250000	3300000
OX382153.1	66	0.376667	0.433333	0.930284	0.433348	-0.0566667	-1.23817	3300000	3345000
OX382153.1	67	0.0825	0.1075	1.13304	0.527795	-0.025	-0.546251	3350000	3400000
OX382153.1	68	0.204	0.172	3.08124	1.43531	0.032	0.699202	3400000	3450000
OX382153.1	69	0.251	0.226	1.3655	0.63608	0.025	0.546251	3450000	3500000
OX382153.1	70	0.359	0.338	1.58637	0.738969	0.021	0.458851	3500000	3550000
OX382153.1	71	0.407	0.414	1.1298	0.526288	-0.007	-0.15295	3550000	3600000
OX382153.1	72	0.38625	0.205	5.40982	2.52002	0.18125	3.96032	3600000	3650000
OX382153.1	73	0.04	0.04	1	0.465823	0	0	3650000	3655000
OX382154.1	0	0.1575	0.325	0.557888	0.259877	-0.1675	-3.65988	10000	50000
OX382154.1	1	0.386	0.354	2.18455	1.01762	0.032	0.699202	50000	100000
OX382154.1	2	0.194	0.25	0.908686	0.423287	-0.056	-1.2236	100000	150000
OX382154.1	3	0.178889	0.173333	2.08666	0.972017	0.00555556	0.121389	150000	200000
OX382154.1	4	0.368889	0.211111	5.2836	2.46122	0.157778	3.44745	200000	250000
OX382154.1	5	0.18	0.22	1.06277	0.495062	-0.04	-0.874002	250000	300000
OX382154.1	6	0.207	0.15	1.71731	0.799964	0.057	1.24545	300000	350000
OX382154.1	7	0.472	0.368	1.45588	0.678185	0.104	2.27241	350000	400000
OX382154.1	8	0.203	0.186	2.9899	1.39277	0.017	0.371451	400000	450000
OX382154.1	9	0.187	0.25	1.60857	0.749308	-0.063	-1.37655	450000	500000
OX382154.1	10	0.18	0.222222	1.46163	0.680864	-0.0422222	-0.922558	500000	550000
OX382154.1	11	0.123333	0.1	2.11944	0.987287	0.0233333	0.509835	550000	595000
OX382154.1	12	0.136	0.066	3.54792	1.6527	0.07	1.5295	600000	650000
OX382154.1	13	0.165	0.124	1.2653	0.589408	0.041	0.895852	650000	700000
OX382154.1	14	0.279	0.226	3.1206	1.45365	0.053	1.15805	700000	750000
OX382154.1	15	0.18625	0.105	3.47743	1.61987	0.08125	1.77532	760000	800000
OX382154.1	16	0.156	0.144	1.99472	0.929189	0.012	0.262201	800000	850000
OX382154.1	17	0.202857	0.122857	1.70952	0.796336	0.08	1.748	860000	900000
OX382154.1	18	0.141	0.15	1.25106	0.582771	-0.009	-0.196651	900000	950000
OX382154.1	19	0.115	0.12	1.86042	0.866626	-0.005	-0.10925	950000	1000000
OX382154.1	20	0.38125	0.3225	3.72898	1.73705	0.05875	1.28369	1005000	1050000
OX382154.1	21	0.177143	0.165714	1.91485	0.89198	0.0114286	0.249715	1050000	1100000
OX382154.1	22	0.187	0.232	0.901456	0.419919	-0.045	-0.983253	1100000	1150000
OX382154.1	23	0.4075	0.3775	1.15484	0.537951	0.03	0.655502	1150000	1190000
OX382154.1	24	0.22	0.02	11	5.12406	0.2	4.37001	1210000	1215000
OX382154.1	25	0.201429	0.248571	4.26554	1.98699	-0.0471429	-1.03007	1265000	1300000
OX382154.1	26	0.133	0.25	1.34353	0.625846	-0.117	-2.55646	1300000	1350000
OX382154.1	27	0.151	0.178	1.01632	0.473427	-0.027	-0.589952	1350000	1400000
OX382154.1	28	0.221111	0.122222	2.57103	1.19765	0.0988889	2.16073	1405000	1450000
OX382154.1	29	0.321	0.228	2.58581	1.20453	0.093	2.03206	1450000	1500000
OX382154.1	30	0.294444	0.373333	1.0171	0.47379	-0.0788889	-1.72373	1505000	1550000
OX382154.1	31	0.133333	0.12	1.19921	0.558618	0.0133333	0.291334	1555000	1600000
OX382154.1	32	0.188	0.212	1.10553	0.514983	-0.024	-0.524401	1600000	1650000
OX382154.1	33	0.469	0.186	5.00883	2.33323	0.283	6.18357	1650000	1700000
OX382154.1	34	0.42	0.3125	5.75402	2.68036	0.1075	2.34888	1700000	1750000
OX382154.1	35	0.515556	0.493333	1.84362	0.8588	0.0222222	0.485557	1750000	1800000
OX382154.1	36	0.28875	0.145	4.7648	2.21956	0.14375	3.14095	1800000	1845000
OX382154.1	37	0.353333	0.517778	0.713541	0.332384	-0.164444	-3.59312	1855000	1900000
OX382154.1	38	0.281	0.408	0.863714	0.402338	-0.127	-2.77496	1900000	1950000
OX382154.1	39	0.738	0.71	1.17279	0.546313	0.028	0.611802	1950000	2000000
OX382154.1	40	0.454	0.778	0.550979	0.256659	-0.324	-7.07942	2000000	2050000
OX382154.1	41	0.653	0.656	1.02845	0.479075	-0.003	-0.0655502	2050000	2100000
OX382154.1	42	0.417	0.42	1.40339	0.653731	-0.003	-0.0655502	2100000	2150000
OX382154.1	43	0.678	0.69	0.998487	0.465118	-0.012	-0.262201	2150000	2200000
OX382154.1	44	0.672	0.742	0.896892	0.417793	-0.07	-1.5295	2200000	2250000
OX382154.1	45	0.509	0.68	0.749856	0.3493	-0.171	-3.73636	2250000	2300000
OX382154.1	46	0.529	0.726	0.784336	0.365362	-0.197	-4.30446	2300000	2350000
OX382154.1	47	0.424	0.748	0.497035	0.23153	-0.324	-7.07942	2350000	2400000
OX382154.1	48	0.593	0.7	0.870452	0.405477	-0.107	-2.33796	2400000	2450000
OX382154.1	49	0.308889	0.437778	0.780519	0.363584	-0.128889	-2.81623	2450000	2500000
OX382154.1	50	0.468	0.556	0.909009	0.423438	-0.088	-1.92281	2500000	2550000
OX382154.1	51	0.46	0.732	0.60826	0.283342	-0.272	-5.94322	2550000	2600000
OX382154.1	52	0.648	0.738	1.3557	0.631518	-0.09	-1.96651	2600000	2650000
OX382154.1	53	0.676	0.758	0.893756	0.416332	-0.082	-1.7917	2650000	2700000
OX382154.1	54	0.416	0.532	0.771012	0.359155	-0.116	-2.53461	2700000	2750000
OX382154.1	55	0.302	0.402	1.70513	0.794289	-0.1	-2.18501	2750000	2800000
OX382154.1	56	0.19	0.353333	0.55892	0.260358	-0.163333	-3.56884	2800000	2850000
OX382154.1	57	0.41	0.598	0.755925	0.352127	-0.188	-4.10781	2850000	2900000
OX382154.1	58	0.391429	0.391429	2.00204	0.932598	-2.87488e-17	-7.92924e-16	2900000	2950000
OX382154.1	59	0.519	0.374	1.54813	0.721156	0.145	3.16826	2950000	3000000
OX382154.1	60	0.524	0.396	2.56012	1.19256	0.128	2.79681	3000000	3050000
OX382154.1	61	0.603	0.802	1.06162	0.494527	-0.199	-4.34816	3050000	3100000
OX382154.1	62	0.4675	0.69	0.671839	0.312958	-0.2225	-4.86164	3100000	3150000
OX382154.1	63	0.78375	0.81	1.27175	0.592411	-0.02625	-0.573564	3150000	3200000
OX382154.1	64	0.371	0.212	2.82268	1.31487	0.159	3.47416	3200000	3250000
OX382154.1	65	0.74625	0.61	1.41975	0.661353	0.13625	2.97707	3250000	3300000
OX382154.1	66	0.514	0.54	1.06836	0.497669	-0.026	-0.568102	3300000	3350000
OX382154.1	67	0.883333	0.791111	1.59488	0.742934	0.0922222	2.01506	3350000	3400000
OX382154.1	68	0.553	0.184	6.16736	2.8729	0.369	8.06267	3400000	3450000
OX382154.1	69	0.484444	0.268889	7.84618	3.65494	0.215556	4.7099	3450000	3500000
OX382154.1	70	0.519	0.434	1.38914	0.647096	0.085	1.85726	3500000	3550000
OX382154.1	71	0.452	0.268	4.59245	2.13927	0.184	4.02041	3550000	3600000
OX382154.1	72	0.4	0.12	3.74286	1.74351	0.28	6.11802	3600000	3610000
OX382155.1	0	0.369	0.324	1.31335	0.61179	0.045	0.983253	0	50000
OX382155.1	1	0.485	0.476	1.06043	0.493974	0.009	0.196651	50000	100000
OX382155.1	2	0.382	0.338	1.33445	0.621616	0.044	0.961403	100000	150000
OX382155.1	3	0.224	0.19	1.14201	0.531977	0.034	0.742902	150000	200000
OX382155.1	4	0.457	0.472	0.983236	0.458014	-0.015	-0.327751	200000	250000
OX382155.1	5	0.418	0.434	0.978864	0.455978	-0.016	-0.349601	250000	300000
OX382155.1	6	0.392	0.378	1.37607	0.641007	0.014	0.305901	300000	350000
OX382155.1	7	0.471	0.518	1.23351	0.5746	-0.047	-1.02695	350000	400000
OX382155.1	8	0.382	0.364	1.05475	0.491327	0.018	0.393301	400000	450000
OX382155.1	9	0.58	0.598	1.01528	0.47294	-0.018	-0.393301	450000	500000
OX382155.1	10	0.692	0.754	1.08032	0.50324	-0.062	-1.3547	500000	550000
OX382155.1	11	0.355	0.35	1.1481	0.53481	0.005	0.10925	550000	600000
OX382155.1	12	0.448	0.45	0.99684	0.464352	-0.002	-0.0437001	600000	650000
OX382155.1	13	0.135	0.142	0.785831	0.366058	-0.007	-0.15295	650000	700000
OX382155.1	14	0.483	0.46	1.05771	0.492708	0.023	0.502551	700000	750000
OX382155.1	15	0.469	0.48	1.13618	0.52926	-0.011	-0.240351	750000	800000
OX382155.1	16	0.314286	0.142857	2.63095	1.22556	0.171429	3.74572	800000	850000
OX382155.1	17	0.307778	0.242222	1.4933	0.695616	0.0655556	1.43239	850000	900000
OX382155.1	18	0.495	0.318	2.42202	1.12823	0.177	3.86746	900000	950000
OX382155.1	19	0.065	0.01	3.25	1.51393	0.055	1.20175	965000	995000
OX382155.1	20	0.45	0.03	15.875	7.39495	0.42	9.17702	1015000	1035000
OX382155.1	21	0.0975	0.015	4.875	2.27089	0.0825	1.80263	1060000	1100000
OX382155.1	22	0.464444	0.264444	2.24692	1.04667	0.2	4.37001	1105000	1150000
OX382155.1	23	0.547778	0.386667	1.72393	0.803046	0.161111	3.52029	1150000	1200000
OX382155.1	24	0.605	0.404	1.75321	0.816685	0.201	4.39186	1200000	1250000
OX382155.1	25	0.577	0.492	1.27987	0.596195	0.085	1.85726	1250000	1300000
OX382155.1	26	0.401111	0.291111	1.83979	0.857019	0.11	2.40351	1300000	1350000
OX382155.1	27	0.38	0.348	1.14149	0.531732	0.032	0.699202	1350000	1400000
OX382155.1	28	0.418	0.406	1.01231	0.47156	0.012	0.262201	1400000	1450000
OX382155.1	29	0.5025	0.4225	1.21002	0.563657	0.08	1.748	1455000	1500000
OX382155.1	30	0.26	0.095	4.19375	1.95355	0.165	3.60526	1500000	1550000
OX382155.1	31	0.351	0.32	1.27097	0.59205	0.031	0.677352	1550000	1600000
OX382155.1	32	0.774	0.768	1.03546	0.482341	0.006	0.1311	1600000	1650000
OX382155.1	33	0.522	0.428	1.39169	0.648282	0.094	2.05391	1650000	1700000
OX382155.1	34	0.29	0.206	1.70282	0.793215	0.084	1.8354	1700000	1750000
OX382155.1	35	0.168889	0.175556	1.17103	0.545492	-0.00666667	-0.145667	1750000	1800000
OX382155.1	36	0.142857	0.0942857	2.48109	1.15575	0.0485714	1.06129	1800000	1850000
OX382155.1	37	0.08625	0.07	1.00781	0.469463	0.01625	0.355063	1850000	1900000
OX382155.1	38	0.165	0.135	2.05039	0.95512	0.03	0.655502	1900000	1950000
OX382155.1	39	0.357143	0.291429	1.36733	0.636933	0.0657143	1.43586	1955000	2000000
OX382155.1	40	0.231	0.178	1.55754	0.725537	0.053	1.15805	2000000	2050000
OX382155.1	41	0.207778	0.182222	1.58059	0.736274	0.0255556	0.55839	2050000	2100000
OX382155.1	42	0.25875	0.2125	1.20391	0.560812	0.04625	1.01057	2100000	2150000
OX382155.1	43	0.406667	0.39	0.998322	0.465042	0.0166667	0.364168	2150000	2200000
OX382155.1	44	0.152222	0.18	0.952935	0.443899	-0.0277778	-0.606946	2200000	2250000
OX382155.1	45	0.07	0.065	0.527778	0.245851	0.005	0.10925	2260000	2295000
OX382155.1	46	0.05	0.06	0.4375	0.203798	-0.01	-0.218501	2300000	2345000
OX382155.1	47	0.2575	0.1275	3.65677	1.70341	0.13	2.84051	2350000	2400000
OX382155.1	48	0.1925	0.09	2.45536	1.14376	0.1025	2.23963	2420000	2440000
OX382155.1	49	0.07	0.055	1.24583	0.580338	0.015	0.327751	2455000	2500000
OX382155.1	50	0.293333	0.2	2.21345	1.03108	0.0933333	2.03934	2520000	2550000
OX382155.1	51	0.0775	0.0825	1.26971	0.591461	-0.005	-0.10925	2550000	2600000
OX382155.1	52	0.232857	0.214286	0.961046	0.447678	0.0185714	0.405787	2600000	2645000
OX382155.1	53	0.106667	0.14	0.650926	0.303217	-0.0333333	-0.728335	2650000	2700000
OX382155.1	54	0.044	0.02	1.66667	0.776372	0.024	0.524401	2700000	2745000
OX382155.1	55	0.0616667	0.0666667	0.533654	0.248588	-0.005	-0.10925	2750000	2800000
OX382155.1	56	0.137143	0.102857	3.60795	1.68067	0.0342857	0.749145	2805000	2850000
OX382155.1	57	0.154286	0.157143	1.23981	0.577532	-0.00285714	-0.0624287	2850000	2890000
OX382155.1	58	0.17	0.152	1.92024	0.894492	0.018	0.393301	2905000	2950000
OX382155.1	59	0.17	0.21	1.05023	0.489223	-0.04	-0.874002	2950000	2995000
OX382155.1	60	0.15	0.025	3.8125	1.77595	0.125	2.73126	3000000	3040000
OX382155.1	61	0.06625	0.0625	0.639062	0.29769	0.00375	0.0819377	3050000	3100000
OX382155.1	62	0.14	0.131429	0.776664	0.361788	0.00857143	0.187286	3100000	3150000
OX382155.1	63	0.10875	0.0725	0.620028	0.288824	0.03625	0.792065	3150000	3200000
OX382155.1	64	0.17	0.186667	0.673115	0.313553	-0.0166667	-0.364168	3205000	3245000
OX382155.1	65	0.04125	0.035	1.03125	0.48038	0.00625	0.136563	3250000	3295000
OX382155.1	66	0.1025	0.065	3.43601	1.60057	0.0375	0.819377	3300000	3340000
OX382155.1	67	0.0625	0.01	3.125	1.4557	0.0525	1.14713	3350000	3385000
OX382155.1	68	0.0075	0.015	0.125	0.0582279	-0.0075	-0.163875	3415000	3450000
OX382155.1	69	0.2775	0.33	0.931739	0.434026	-0.0525	-1.14713	3450000	3500000
OX382155.1	70	0.127778	0.108889	3.17269	1.47791	0.0188889	0.412723	3500000	3545000
OX382155.1	71	0.13125	0.105	2.39167	1.11409	0.02625	0.573564	3555000	3595000
OX382156.1	0	0.352	0.278	1.43284	0.667452	0.074	1.6169	0	50000
OX382156.1	1	0.41	0.292	3.29066	1.53287	0.118	2.57831	50000	100000
OX382156.1	2	0.268571	0.14	3.20904	1.49484	0.128571	2.80929	100000	150000
OX382156.1	3	0.23	0.2075	1.61293	0.75134	0.0225	0.491626	150000	195000
OX382156.1	4	0.446667	0.457778	1.2635	0.588568	-0.0111111	-0.242778	200000	250000
OX382156.1	5	0.27	0.216	1.63718	0.762638	0.054	1.1799	250000	300000
OX382156.1	6	0.273	0.35	0.862557	0.401799	-0.077	-1.68245	300000	350000
OX382156.1	7	0.205556	0.108889	2.19012	1.02021	0.0966667	2.11217	350000	400000
OX382156.1	8	0.253	0.162	1.9133	0.89126	0.091	1.98836	400000	450000
OX382156.1	9	0.28	0.09	10.6928	4.98096	0.19	4.15151	450000	490000
OX382156.1	10	0.332	0.28	1.21643	0.56664	0.052	1.1362	500000	550000
OX382156.1	11	0.5225	0.2525	8.08114	3.76438	0.27	5.89952	560000	600000
OX382156.1	12	0.271111	0.286667	1.31055	0.610483	-0.0155556	-0.33989	600000	650000
OX382156.1	13	0.182	0.148	4.97063	2.31544	0.034	0.742902	650000	695000
OX382156.1	14	0.2575	0.1625	2.57654	1.20021	0.095	2.07576	705000	750000
OX382156.1	15	0.314	0.064	7.62222	3.55061	0.25	5.46251	760000	800000
OX382156.1	16	0.264444	0.248889	1.5937	0.742385	0.0155556	0.33989	800000	850000
OX382156.1	17	0.268333	0.0466667	5.95833	2.77553	0.221667	4.84343	850000	900000
OX382156.1	18	0.585	0.47	1.98722	0.925695	0.115	2.51276	920000	950000
OX382156.1	19	0.707	0.554	1.3265	0.617915	0.153	3.34306	950000	1000000
OX382156.1	20	0.6	0.528889	3.73553	1.7401	0.0711111	1.55378	1000000	1050000
OX382156.1	21	0.85	0.694	1.32112	0.615407	0.156	3.40861	1050000	1100000
OX382156.1	22	0.822	0.756	1.16267	0.5416	0.066	1.4421	1100000	1150000
OX382156.1	23	0.673	0.5	1.47756	0.688284	0.173	3.78006	1150000	1200000
OX382156.1	24	0.962222	0.777778	1.37023	0.638287	0.184444	4.03012	1200000	1250000
OX382156.1	25	0.663	0.572	1.81815	0.846938	0.091	1.98836	1250000	1300000
OX382156.1	26	0.934	0.788	1.38644	0.645838	0.146	3.19011	1300000	1350000
OX382156.1	27	0.622	0.358	2.44176	1.13743	0.264	5.76842	1350000	1400000
OX382156.1	28	0.943	0.834	1.25486	0.584544	0.109	2.38166	1400000	1450000
OX382156.1	29	0.446667	0.323333	5.93428	2.76433	0.123333	2.69484	1450000	1495000
OX382156.1	30	0.284	0.18	1.19639	0.557308	0.104	2.27241	1515000	1550000
OX382156.1	31	0.60375	0.275	8.24055	3.83864	0.32875	7.18321	1550000	1600000
OX382156.1	32	0.717778	0.191111	7.58497	3.53326	0.526667	11.5077	1600000	1650000
OX382156.1	33	0.468889	0.295556	2.96416	1.38078	0.173333	3.78734	1650000	1700000
OX382156.1	34	0.236	0.266	1.13074	0.526726	-0.03	-0.655502	1700000	1750000
OX382156.1	35	0.336667	0.335556	2.25615	1.05097	0.00111111	0.0242778	1750000	1795000
OX382156.1	36	0.238	0.22	2.01146	0.936984	0.018	0.393301	1810000	1840000
OX382156.1	37	0.292857	0.102857	9.90499	4.61398	0.19	4.15151	1850000	1900000
OX382156.1	38	0.115	0.176	0.617806	0.287788	-0.061	-1.33285	1900000	1950000
OX382156.1	39	0.336	0.218	2.73058	1.27197	0.118	2.57831	1950000	2000000
OX382156.1	40	0.31	0.312	1.52374	0.709793	-0.002	-0.0437001	2000000	2050000
OX382156.1	41	0.477	0.344	3.59052	1.67255	0.133	2.90606	2050000	2100000
OX382156.1	42	0.395	0.408	1.31678	0.613388	-0.013	-0.284051	2100000	2150000
OX382156.1	43	0.218889	0.335556	0.926601	0.431633	-0.116667	-2.54917	2155000	2200000
OX382156.1	44	0.387	0.48	0.729383	0.339764	-0.093	-2.03206	2200000	2250000
OX382156.1	45	0.165	0.2	0.89833	0.418463	-0.035	-0.764752	2250000	2300000
OX382156.1	46	0.358571	0.131429	8.44446	3.93363	0.227143	4.96308	2300000	2345000
OX382156.1	47	0.35875	0.095	6.26736	2.91948	0.26375	5.76295	2350000	2400000
OX382156.1	48	0.194	0.196	1.32328	0.616414	-0.002	-0.0437001	2400000	2450000
OX382156.1	49	0.231111	0.24	1.58914	0.740261	-0.00888889	-0.194223	2450000	2500000
OX382156.1	50	0.181111	0.135556	1.90815	0.888863	0.0455556	0.995392	2500000	2550000
OX382156.1	51	0.232	0.248	1.68433	0.784602	-0.016	-0.349601	2550000	2600000
OX382156.1	52	0.302	0.306	2.40237	1.11908	-0.004	-0.0874002	2600000	2650000
OX382156.1	53	0.163333	0.19	1.00388	0.467633	-0.0266667	-0.582668	2650000	2700000
OX382156.1	54	0.122857	0.131429	2.12309	0.988984	-0.00857143	-0.187286	2700000	2750000
OX382156.1	55	0.152	0.024	6.6	3.07443	0.128	2.79681	2750000	2800000
OX382156.1	56	0.103333	0.2	0.717115	0.334049	-0.0966667	-2.11217	2805000	2850000
OX382156.1	57	0.165714	0.0571429	4.64031	2.16156	0.108571	2.37229	2855000	2900000
OX382156.1	58	0.326	0.356	1.10932	0.516745	-0.03	-0.655502	2900000	2950000
OX382156.1	59	0.165556	0.217778	0.840907	0.391714	-0.0522222	-1.14106	2950000	2995000
OX382156.1	60	0.174444	0.157778	1.30267	0.606815	0.0166667	0.364168	3000000	3050000
OX382156.1	61	0.301	0.294	2.10143	0.978897	0.007	0.15295	3050000	3100000
OX382156.1	62	0.38	0.265	4.27384	1.99085	0.115	2.51276	3100000	3150000
OX382156.1	63	0.2925	0.2575	1.40346	0.653766	0.035	0.764752	3160000	3200000
OX382156.1	64	0.394286	0.108571	9.34206	4.35175	0.285714	6.24287	3200000	3250000
OX382156.1	65	0.223	0.184	3.11967	1.45321	0.039	0.852152	3250000	3300000
OX382156.1	66	0.274	0.248	1.22957	0.572762	0.026	0.568102	3300000	3350000
OX382156.1	67	0.233	0.3	1.24615	0.580486	-0.067	-1.46395	3350000	3400000
OX382156.1	68	0.216	0.228	0.96415	0.449124	-0.012	-0.262201	3400000	3450000
OX382156.1	69	0.2325	0.3	1.78952	0.833601	-0.0675	-1.47488	3450000	3470000
OX382157.1	0	0.215714	0.205714	1.07721	0.50179	0.01	0.218501	0	40000
OX382157.1	1	0.1625	0.065	5.69167	2.65131	0.0975	2.13038	60000	100000
OX382157.1	2	0.189	0.162	2.12806	0.991301	0.027	0.589952	100000	150000
OX382157.1	3	0.347	0.424	1.12234	0.52281	-0.077	-1.68245	150000	200000
OX382157.1	4	0.273333	0.273333	1.20124	0.559567	0	3.70074e-17	200000	235000
OX382157.1	5	0.362857	0.231429	4.70171	2.19017	0.131429	2.87172	260000	300000
OX382157.1	6	0.35	0.12	10.4688	4.87659	0.23	5.02551	305000	335000
OX382157.1	7	0.145	0.03	3.875	1.80507	0.115	2.51276	380000	390000
OX382157.1	8	0.233333	0.0466667	5.75	2.67848	0.186667	4.07868	405000	425000
OX382157.1	9	0.12	0.02	3	1.39747	0.1	2.18501	475000	500000
OX382157.1	10	0.245	0.0533333	5.14524	2.39677	0.191667	4.18793	500000	550000
OX382157.1	11	0.513333	0.48	1.98647	0.925345	0.0333333	0.728335	550000	595000
OX382157.1	12	0.148	0.174	1.26667	0.590043	-0.026	-0.568102	600000	650000
OX382157.1	13	0.345	0.28	1.43414	0.668055	0.065	1.42025	650000	700000
OX382157.1	14	0.253333	0.153333	4.29379	2.00015	0.1	2.18501	700000	750000
OX382157.1	15	0.17375	0.225	1.91351	0.891356	-0.05125	-1.11982	750000	800000
OX382157.1	16	0.303	0.316	2.26948	1.05718	-0.013	-0.284051	800000	850000
OX382157.1	17	0.122222	0.248889	0.573698	0.267242	-0.126667	-2.76767	850000	900000
OX382157.1	18	0.254	0.31	0.991776	0.461993	-0.056	-1.2236	900000	950000
OX382157.1	19	0.208	0.282	2.31418	1.078	-0.074	-1.6169	950000	1000000
OX382157.1	20	0.205	0.1575	1.46176	0.68092	0.0475	1.03788	1000000	1050000
OX382157.1	21	0.204	0.198	1.53508	0.715076	0.006	0.1311	1050000	1100000
OX382157.1	22	0.329	0.224	2.29722	1.0701	0.105	2.29426	1100000	1150000
OX382157.1	23	0.299	0.328	0.827395	0.38542	-0.029	-0.633652	1150000	1200000
OX382157.1	24	0.344	0.162	4.15577	1.93585	0.182	3.97671	1200000	1250000
OX382157.1	25	0.225	0.24	1.01625	0.473393	-0.015	-0.327751	1250000	1300000
OX382157.1	26	0.617	0.832	0.827398	0.385422	-0.215	-4.69776	1300000	1350000
OX382157.1	27	0.557	0.678	0.80954	0.377103	-0.121	-2.64386	1350000	1400000
OX382157.1	28	0.363	0.474	0.819623	0.3818	-0.111	-2.42536	1400000	1450000
OX382157.1	29	0.565	0.628	1.04791	0.488143	-0.063	-1.37655	1450000	1500000
OX382157.1	30	0.616	0.572	1.1717	0.545804	0.044	0.961403	1500000	1550000
OX382157.1	31	0.524	0.522	1.10501	0.514737	0.002	0.0437001	1550000	1600000
OX382157.1	32	0.108	0.14	0.805321	0.375137	-0.032	-0.699202	1600000	1650000
OX382157.1	33	0.32	0.324	0.942959	0.439252	-0.004	-0.0874002	1650000	1700000
OX382157.1	34	0.694444	0.422222	2.33584	1.08809	0.272222	5.94807	1700000	1750000
OX382157.1	35	0.232857	0.237143	1.62315	0.756101	-0.00428571	-0.0936431	1750000	1800000
OX382157.1	36	0.192222	0.16	1.91774	0.893327	0.0322222	0.704057	1800000	1845000
OX382157.1	37	0.19	0.186667	1.29871	0.604972	0.00333333	0.0728335	1855000	1900000
OX382157.1	38	0.244	0.256	1.42119	0.662022	-0.012	-0.262201	1900000	1950000
OX382157.1	39	0.384444	0.257778	4.12548	1.92175	0.126667	2.76767	1950000	2000000
OX382157.1	40	0.403333	0.524444	0.728649	0.339422	-0.121111	-2.64628	2000000	2050000
OX382157.1	41	0.479	0.492	0.868185	0.404421	-0.013	-0.284051	2050000	2100000
OX382157.1	42	0.389	0.318	1.34789	0.62788	0.071	1.55135	2100000	2150000
OX382157.1	43	0.114	0.13	1.07988	0.503034	-0.016	-0.349601	2150000	2200000
OX382157.1	44	0.194444	0.173333	2.19552	1.02273	0.0211111	0.461279	2200000	2250000
OX382157.1	45	0.192857	0.16	1.63492	0.761584	0.0328571	0.717931	2250000	2300000
OX382157.1	46	0.205556	0.284444	0.576802	0.268688	-0.0788889	-1.72373	2300000	2350000
OX382157.1	47	0.187	0.24	1.19359	0.556001	-0.053	-1.15805	2350000	2400000
OX382157.1	48	0.265556	0.233333	1.15914	0.539956	0.0322222	0.704057	2400000	2450000
OX382157.1	49	0.0985714	0.1	1.74675	0.813679	-0.00142857	-0.0312144	2455000	2495000
OX382157.1	50	0.34	0.065	7.96875	3.71203	0.275	6.00877	2500000	2525000
OX382157.1	51	0.21	0.19	1.11111	0.517582	0.02	0.437001	2550000	2600000
OX382157.1	52	0.476667	0.146667	8.05185	3.75074	0.33	7.21052	2600000	2650000
OX382157.1	53	0.271	0.234	2.45448	1.14335	0.037	0.808452	2650000	2700000
OX382157.1	54	0.20125	0.17	1.81433	0.845156	0.03125	0.682814	2705000	2745000
OX382157.1	55	0.688	0.476	1.42139	0.662115	0.212	4.63221	2750000	2800000
OX382157.1	56	0.523	0.444	1.24932	0.581964	0.079	1.72615	2800000	2850000
OX382157.1	57	0.226667	0.242222	1.19124	0.554909	-0.0155556	-0.33989	2850000	2900000
OX382157.1	58	0.579	0.366	1.78621	0.832058	0.213	4.65406	2900000	2950000
OX382157.1	59	0.34	0.153333	5.2589	2.44972	0.186667	4.07868	2950000	3000000
OX382157.1	60	0.116667	0.126667	0.78592	0.3661	-0.01	-0.218501	3000000	3050000
OX382157.1	61	0.345	0.328	1.22875	0.572381	0.017	0.371451	3050000	3100000
OX382157.1	62	0.124	0.192	0.69662	0.324502	-0.068	-1.4858	3100000	3150000
OX382157.1	63	0.27	0.136667	3.50104	1.63087	0.133333	2.91334	3150000	3200000
OX382157.1	64	0.26	0.248	1.59484	0.742914	0.012	0.262201	3200000	3250000
OX382157.1	65	0.225	0.204	1.22626	0.571222	0.021	0.458851	3250000	3300000
OX382157.1	66	0.654	0.622	1.20341	0.560576	0.032	0.699202	3300000	3350000
OX382157.1	67	0.491	0.474	1.09176	0.508565	0.017	0.371451	3350000	3400000
OX382157.1	68	0.227778	0.111111	2.9418	1.37036	0.116667	2.54917	3400000	3450000
OX382157.1	69	0.172	0.208	0.842424	0.392421	-0.036	-0.786602	3450000	3475000
OX382158.1	0	0.198	0.23	1.86708	0.869731	-0.032	-0.699202	0	50000
OX382158.1	1	0.194444	0.168889	2.166	1.00897	0.0255556	0.55839	50000	100000
OX382158.1	2	0.296	0.312	1.16186	0.54122	-0.016	-0.349601	100000	150000
OX382158.1	3	0.293	0.358	1.49317	0.695553	-0.065	-1.42025	150000	200000
OX382158.1	4	0.306	0.35	1.0563	0.492048	-0.044	-0.961403	200000	250000
OX382158.1	5	0.646	0.516	1.39713	0.650818	0.13	2.84051	250000	300000
OX382158.1	6	0.14	0.164444	1.32384	0.616677	-0.0244444	-0.534113	305000	350000
OX382158.1	7	0.341111	0.328889	1.12575	0.524402	0.0122222	0.267056	350000	400000
OX382158.1	8	0.337	0.318	1.77484	0.826763	0.019	0.415151	400000	450000
OX382158.1	9	0.292	0.278	1.3252	0.617308	0.014	0.305901	450000	500000
OX382158.1	10	0.399	0.424	1.3073	0.60897	-0.025	-0.546251	500000	550000
OX382158.1	11	0.437778	0.595556	1.26069	0.587261	-0.157778	-3.44745	550000	600000
OX382158.1	12	0.538	0.518	1.26905	0.591155	0.02	0.437001	600000	650000
OX382158.1	13	0.31625	0.29	1.24674	0.580761	0.02625	0.573564	660000	700000
OX382158.1	14	0.557	0.502	1.53124	0.71329	0.055	1.20175	700000	750000
OX382158.1	15	0.361	0.138	7.54014	3.51238	0.223	4.87256	750000	800000
OX382158.1	16	0.299	0.386	1.80701	0.841749	-0.087	-1.90096	800000	850000
OX382158.1	17	0.199	0.418	0.723429	0.33699	-0.219	-4.78516	850000	900000
OX382158.1	18	0.49	0.354	3.29115	1.5331	0.136	2.97161	900000	950000
OX382158.1	19	0.789	0.448	1.84444	0.859184	0.341	7.45087	950000	1000000
OX382158.1	20	0.527778	0.197778	6.54756	3.05001	0.33	7.21052	1000000	1050000
OX382158.1	21	0.698889	0.922222	0.706465	0.329088	-0.223333	-4.87985	1050000	1095000
OX382158.1	22	0.7175	0.43	3.16084	1.4724	0.2875	6.28189	1130000	1150000
OX382158.1	23	0.702222	0.606667	1.05652	0.49215	0.0955556	2.08789	1150000	1200000
OX382158.1	24	0.43125	0.2075	2.82919	1.3179	0.22375	4.88895	1200000	1250000
OX382158.1	25	0.651111	0.555556	1.691	0.78771	0.0955556	2.08789	1250000	1295000
OX382158.1	26	0.3925	0.0975	4.17336	1.94405	0.295	6.44577	1300000	1350000
OX382158.1	27	0.272222	0.215556	2.78863	1.29901	0.0566667	1.23817	1350000	1400000
OX382158.1	28	0.272	0.188	1.7969	0.83704	0.084	1.8354	1400000	1440000
OX382158.1	29	0.45	0.464	0.934799	0.435451	-0.014	-0.305901	1465000	1500000
OX382158.1	30	0.2075	0.13	3.4375	1.60127	0.0775	1.69338	1500000	1550000
OX382158.1	31	0.676	0.658	1.18279	0.550973	0.018	0.393301	1550000	1600000
OX382158.1	32	0.607	0.45	1.97766	0.92124	0.157	3.43046	1600000	1650000
OX382158.1	33	0.431	0.492	0.982107	0.457488	-0.061	-1.33285	1650000	1700000
OX382158.1	34	0.705556	0.591111	1.84613	0.859971	0.114444	2.50062	1700000	1750000
OX382158.1	35	0.36	0.386	1.055	0.491446	-0.026	-0.568102	1750000	1800000
OX382158.1	36	0.592	0.558	1.67689	0.781135	0.034	0.742902	1800000	1850000
OX382158.1	37	0.572222	0.4	1.80846	0.842424	0.172222	3.76307	1850000	1895000
OX382158.1	38	0.56	0.473333	1.29658	0.603978	0.0866667	1.89367	1900000	1945000
OX382158.1	39	0.5	0.298	2.30426	1.07338	0.202	4.41371	1950000	2000000
OX382158.1	40	0.185556	0.0933333	2.63519	1.22753	0.0922222	2.01506	2000000	2050000
OX382158.1	41	0.6	0.508	1.4759	0.687509	0.092	2.01021	2050000	2100000
OX382158.1	42	0.308889	0.246667	1.29168	0.601696	0.0622222	1.35956	2100000	2150000
OX382158.1	43	0.423333	0.32	1.01834	0.474367	0.103333	2.25784	2150000	2200000
OX382158.1	44	0.567	0.46	1.33113	0.620072	0.107	2.33796	2200000	2250000
OX382158.1	45	0.625	0.414	3.67513	1.71196	0.211	4.61036	2250000	2300000
OX382158.1	46	0.865	0.6375	1.61309	0.751417	0.2275	4.97089	2300000	2350000
OX382158.1	47	0.361	0.342	1.20282	0.5603	0.019	0.415151	2350000	2400000
OX382158.1	48	0.54	0.55	1.01932	0.474821	-0.01	-0.218501	2400000	2450000
OX382158.1	49	0.375	0.232	2.33318	1.08685	0.143	3.12456	2450000	2500000
OX382158.1	50	0.855556	0.648889	1.55399	0.723883	0.206667	4.51568	2500000	2545000
OX382158.1	51	0.581	0.466	2.65051	1.23467	0.115	2.51276	2550000	2600000
OX382158.1	52	0.586667	0.588889	1.139	0.530571	-0.00222222	-0.0485557	2600000	2650000
OX382158.1	53	0.171111	0.208889	1.45172	0.676245	-0.0377778	-0.825447	2655000	2700000
OX382158.1	54	0.601111	0.348889	4.59963	2.14262	0.252222	5.51107	2705000	2750000
OX382158.1	55	0.499	0.534	1.67987	0.782524	-0.035	-0.764752	2750000	2800000
OX382158.1	56	0.361111	0.337778	1.21559	0.566251	0.0233333	0.509835	2800000	2850000
OX382158.1	57	0.644444	0.444444	5.5847	2.60148	0.2	4.37001	2850000	2895000
OX382158.1	58	0.463333	0.371111	1.27971	0.596117	0.0922222	2.01506	2900000	2950000
OX382158.1	59	0.616	0.624	1.59102	0.741135	-0.008	-0.1748	2950000	3000000
OX382158.1	60	0.715714	0.622857	2.08512	0.971296	0.0928571	2.02893	3000000	3045000
OX382158.1	61	0.856	0.422	5.76322	2.68464	0.434	9.48293	3050000	3100000
OX382158.1	62	0.509	0.312	4.2733	1.9906	0.197	4.30446	3100000	3150000
OX382158.1	63	0.58	0.508	1.28082	0.596635	0.072	1.5732	3150000	3200000
OX382158.1	64	0.566	0.422	2.04153	0.950994	0.144	3.14641	3200000	3250000
OX382158.1	65	0.573	0.312	7.23679	3.37107	0.261	5.70287	3250000	3300000
OX382158.1	66	0.475	0.15	3.55	1.65367	0.325	7.10127	3300000	3310000
OX382159.1	0	0.182857	0.0742857	2.18074	1.01584	0.108571	2.37229	0	50000
OX382159.1	1	0.402222	0.435556	1.42531	0.663945	-0.0333333	-0.728335	50000	100000
OX382159.1	2	0.276	0.232	1.5933	0.742198	0.044	0.961403	100000	150000
OX382159.1	3	0.289	0.232	2.08137	0.969551	0.057	1.24545	150000	200000
OX382159.1	4	0.346	0.43	0.871928	0.406165	-0.084	-1.8354	200000	250000
OX382159.1	5	0.32	0.215556	1.71987	0.801156	0.104444	2.28212	250000	300000
OX382159.1	6	0.234	0.224	3.03471	1.41364	0.01	0.218501	300000	350000
OX382159.1	7	0.183	0.134	2.60292	1.2125	0.049	1.07065	350000	400000
OX382159.1	8	0.32	0.0825	7.62466	3.55174	0.2375	5.18939	405000	450000
OX382159.1	9	0.35	0.302	1.36474	0.635726	0.048	1.0488	450000	500000
OX382159.1	10	0.281	0.346	0.890724	0.41492	-0.065	-1.42025	500000	550000
OX382159.1	11	0.361	0.176	3.48102	1.62154	0.185	4.04226	550000	600000
OX382159.1	12	0.187	0.26	0.861545	0.401328	-0.073	-1.59505	600000	650000
OX382159.1	13	0.105	0.18	0.638914	0.297621	-0.075	-1.63875	650000	700000
OX382159.1	14	0.185556	0.177778	2.23222	1.03982	0.00777778	0.169945	700000	750000
OX382159.1	15	0.147	0.23	1.27933	0.595941	-0.083	-1.81355	750000	800000
OX382159.1	16	0.241429	0.162857	3.35182	1.56136	0.0785714	1.71679	805000	850000
OX382159.1	17	0.163333	0.162222	1.04208	0.485426	0.00111111	0.0242778	850000	900000
OX382159.1	18	0.153	0.164	1.24021	0.577718	-0.011	-0.240351	900000	950000
OX382159.1	19	0.18	0.175556	1.04604	0.487269	0.00444444	0.0971114	950000	1000000
OX382159.1	20	0.184444	0.202222	1.1758	0.547713	-0.0177778	-0.388445	1000000	1050000
OX382159.1	21	0.179	0.22	1.13629	0.529312	-0.041	-0.895852	1050000	1100000
OX382159.1	22	0.417	0.38	1.16706	0.543642	0.037	0.808452	1100000	1150000
OX382159.1	23	0.22125	0.1425	2.63987	1.22971	0.07875	1.72069	1150000	1200000
OX382159.1	24	0.196667	0.111111	3.27037	1.52342	0.0855556	1.86939	1200000	1245000
OX382159.1	25	0.31	0.213333	2.18701	1.01876	0.0966667	2.11217	1250000	1300000
OX382159.1	26	0.192	0.232	1.17887	0.549146	-0.04	-0.874002	1300000	1350000
OX382159.1	27	0.137778	0.224444	0.673247	0.313614	-0.0866667	-1.89367	1350000	1400000
OX382159.1	28	0.112	0.104	1.75173	0.815999	0.008	0.1748	1400000	1450000
OX382159.1	29	0.137	0.26	0.571779	0.266348	-0.123	-2.68756	1450000	1500000
OX382159.1	30	0.293	0.202	2.14772	1.00046	0.091	1.98836	1500000	1550000
OX382159.1	31	0.56	0.466	1.56305	0.728105	0.094	2.05391	1550000	1600000
OX382159.1	32	0.376	0.272	1.87093	0.871521	0.104	2.27241	1600000	1650000
OX382159.1	33	0.174	0.17	1.10338	0.51398	0.004	0.0874002	1650000	1700000
OX382159.1	34	0.307	0.234	1.8627	0.867689	0.073	1.59505	1700000	1750000
OX382159.1	35	0.261111	0.155556	4.35843	2.03026	0.105556	2.3064	1750000	1800000
OX382159.1	36	0.538	0.468	1.09192	0.508644	0.07	1.5295	1800000	1850000
OX382159.1	37	0.36	0.237778	2.13969	0.996716	0.122222	2.67056	1850000	1900000
OX382159.1	38	0.29	0.137778	4.00638	1.86627	0.152222	3.32606	1900000	1950000
OX382159.1	39	0.461	0.432	2.18987	1.02009	0.029	0.633652	1950000	2000000
OX382159.1	40	0.263	0.204	2.46345	1.14753	0.059	1.28915	2000000	2050000
OX382159.1	41	0.284286	0.608571	0.838553	0.390618	-0.324286	-7.08566	2050000	2100000
OX382159.1	42	0.177143	0.171429	0.933754	0.434964	0.00571429	0.124857	2105000	2145000
OX382159.1	43	0.583	0.428	2.46731	1.14933	0.155	3.38676	2150000	2200000
OX382159.1	44	0.453	0.392	1.17459	0.54715	0.061	1.33285	2200000	2250000
OX382159.1	45	0.467	0.524	1.01451	0.472581	-0.057	-1.24545	2250000	2300000
OX382159.1	46	0.771	0.756	3.63257	1.69214	0.015	0.327751	2300000	2350000
OX382159.1	47	0.306667	0.524444	0.750337	0.349525	-0.217778	-4.75846	2350000	2400000
OX382159.1	48	0.36	0.622222	0.664362	0.309475	-0.262222	-5.72957	2400000	2450000
OX382159.1	49	0.162222	0.0844444	1.45718	0.678787	0.0777778	1.69945	2450000	2500000
OX382159.1	50	0.16125	0.06	5.40865	2.51948	0.10125	2.21232	2500000	2550000
OX382159.1	51	0.31875	0.2075	1.77046	0.824721	0.11125	2.43082	2550000	2600000
OX382159.1	52	0.264	0.492	0.570361	0.265688	-0.228	-4.98181	2600000	2650000
[truncated: 519 more rows]

## Sheet: Olob_alternate
chr	range	heterogametic	homogametic	ratio	ratio_scaled	diff	diff_scaled	start	end
[truncated: 1,780 more rows]

[truncated: 2 more sheets: Petfi.difHeterozygosity.50000bp, Pvent.difHeterozygosity.50000bp]
