# Supplementary material for: Sponge genomes reveal a pre-metazoan origin of the sex determination toolkit and sex chromosomes
Source: Research Square preprint supplement (doi:10.21203/rs.3.rs-8554461/v1), 2026-02-12
Supplement: Supplementary file 2 [file 1471997ea4f766122fd0be70.xlsx]

## Sheet: Chreni_M.regions.normalised
OX359189.1	0	1000000	0.007830357
OX359189.1	1000000	2000000	0.006422092
OX359189.1	2000000	3000000	0.005393194
OX359189.1	3000000	4000000	0.007403648
OX359189.1	4000000	5000000	0.00577256
OX359189.1	5000000	6000000	0.007031225
OX359189.1	6000000	7000000	0.004702001
OX359189.1	7000000	8000000	0.005234125
OX359189.1	8000000	9000000	0.003237557
OX359189.1	9000000	10000000	0.003571476
OX359189.1	10000000	10413042	0.002562777
OX359190.1	0	1000000	0.003659216
OX359190.1	1000000	2000000	0.002735102
OX359190.1	2000000	3000000	0.002927626
OX359190.1	3000000	4000000	0.00510788
OX359190.1	4000000	5000000	0.006780628
OX359190.1	5000000	6000000	0.005186783
OX359190.1	6000000	7000000	0.007918728
OX359190.1	7000000	8000000	0.00557688
OX359190.1	8000000	9000000	0.00589565
OX359190.1	9000000	10000000	0.006420198
OX359190.1	10000000	10288994	0.0068589
OX359191.1	0	1000000	0.004788479
OX359191.1	1000000	2000000	0.00623588
OX359191.1	2000000	3000000	0.005835683
OX359191.1	3000000	4000000	0.002324805
OX359191.1	4000000	5000000	0.005410237
OX359191.1	5000000	6000000	0.007171357
OX359191.1	6000000	7000000	0.00533449
OX359191.1	7000000	8000000	0.005674089
OX359191.1	8000000	9000000	0.007411854
OX359191.1	9000000	9415654	0.007721786
OX359192.1	0	1000000	0.006817871
OX359192.1	1000000	2000000	0.005590767
OX359192.1	2000000	3000000	0.005578143
OX359192.1	3000000	4000000	0.001564178
OX359192.1	4000000	5000000	0.002241483
OX359192.1	5000000	6000000	0.008430653
OX359192.1	6000000	7000000	0.007416904
OX359192.1	7000000	8000000	0.007179563
OX359192.1	8000000	8959380	0.007552617
OX359193.1	0	1000000	0.007474977
OX359193.1	1000000	2000000	0.007070361
OX359193.1	2000000	3000000	0.008142814
OX359193.1	3000000	4000000	0.005641266
OX359193.1	4000000	5000000	0.007851187
OX359193.1	5000000	6000000	0.007776703
OX359193.1	6000000	7000000	0.007763447
OX359193.1	7000000	8000000	0.007730623
OX359193.1	8000000	8804818	0.006664483
OX359194.1	0	1000000	0.0047424
OX359194.1	1000000	2000000	0.004881901
OX359194.1	2000000	3000000	0.005029608
OX359194.1	3000000	4000000	0.007204812
OX359194.1	4000000	5000000	0.004925455
OX359194.1	5000000	6000000	0.005581299
OX359194.1	6000000	7000000	0.005920267
OX359194.1	7000000	8000000	0.007738829
OX359194.1	8000000	8731016	0.007276772
OX359195.1	0	1000000	0.00447981
OX359195.1	1000000	2000000	0.004102968
OX359195.1	2000000	3000000	0.00401144
OX359195.1	3000000	4000000	0.003855528
OX359195.1	4000000	5000000	0.006944747
OX359195.1	5000000	6000000	0.006299634
OX359195.1	6000000	7000000	0.006870262
OX359195.1	7000000	8000000	0.00685385
OX359195.1	8000000	8459200	0.006538237
OX359196.1	0	1000000	0.006718768
OX359196.1	1000000	2000000	0.005802859
OX359196.1	2000000	3000000	0.006675213
OX359196.1	3000000	4000000	0.006424617
OX359196.1	4000000	5000000	0.007384711
OX359196.1	5000000	6000000	0.008239391
OX359196.1	6000000	7000000	0.007972383
OX359196.1	7000000	8000000	0.007094347
OX359196.1	8000000	8125224	0.007882117
OX359197.1	0	1000000	0.005879869
OX359197.1	1000000	2000000	0.004914093
OX359197.1	2000000	3000000	0.006981358
OX359197.1	3000000	4000000	0.00369204
OX359197.1	4000000	5000000	0.007129696
OX359197.1	5000000	6000000	0.005444954
OX359197.1	6000000	7000000	0.006911923
OX359197.1	7000000	7704672	0.005727743
OX359198.1	0	1000000	0.004724094
OX359198.1	1000000	2000000	0.003224933
OX359198.1	2000000	3000000	0.006068605
OX359198.1	3000000	4000000	0.004385757
OX359198.1	4000000	5000000	0.007393548
OX359198.1	5000000	6000000	0.00722943
OX359198.1	6000000	7000000	0.007204181
OX359198.1	7000000	7657449	0.007532418
OX359199.1	0	1000000	0.004830772
OX359199.1	1000000	2000000	0.004973429
OX359199.1	2000000	3000000	0.006342557
OX359199.1	3000000	4000000	0.006047775
OX359199.1	4000000	5000000	0.007978695
OX359199.1	5000000	6000000	0.007083617
OX359199.1	6000000	7000000	0.008122614
OX359199.1	7000000	7633987	0.007853712
OX359200.1	0	1000000	0.007303914
OX359200.1	1000000	2000000	0.006928335
OX359200.1	2000000	3000000	0.006843751
OX359200.1	3000000	4000000	0.003319617
OX359200.1	4000000	5000000	0.004809941
OX359200.1	5000000	6000000	0.004479179
OX359200.1	6000000	7000000	0.00614814
OX359200.1	7000000	7521688	0.006121628
OX359201.1	0	1000000	0.005321234
OX359201.1	1000000	2000000	0.005162796
OX359201.1	2000000	3000000	0.005752992
OX359201.1	3000000	4000000	0.005208876
OX359201.1	4000000	5000000	0.005333227
OX359201.1	5000000	6000000	0.007150527
OX359201.1	6000000	6903244	0.007905473
OX359202.1	0	1000000	0.006152558
OX359202.1	1000000	2000000	0.006434716
OX359202.1	2000000	3000000	0.007091823
OX359202.1	3000000	4000000	0.005554788
OX359202.1	4000000	5000000	0.007153051
OX359202.1	5000000	6000000	0.007047637
OX359202.1	6000000	6754398	0.007662451
OX359203.1	0	17451	0.255358003

## Sheet: Chreni_F.regions.normalised
OX359189.1	0	1000000	0.00781910251143542
OX359189.1	1000000	2000000	0.00634325209931768
OX359189.1	2000000	3000000	0.00538609325659464
OX359189.1	3000000	4000000	0.00746915859928379
OX359189.1	4000000	5000000	0.00616205584440913
OX359189.1	5000000	6000000	0.00696706516010971
OX359189.1	6000000	7000000	0.0051066913978807
OX359189.1	7000000	8000000	0.00551887829835969
OX359189.1	8000000	9000000	0.0033223923991629
OX359189.1	9000000	10000000	0.00369999986168225
OX359189.1	10000000	10413042	0.00321035502017364
OX359190.1	0	1000000	0.00385768209877824
OX359190.1	1000000	2000000	0.0029890466172319
OX359190.1	2000000	3000000	0.00325185034572522
OX359190.1	3000000	4000000	0.00522564466446188
OX359190.1	4000000	5000000	0.00706803711895188
OX359190.1	5000000	6000000	0.00516893438620806
OX359190.1	6000000	7000000	0.0076448221441188
OX359190.1	7000000	8000000	0.00545248577747717
OX359190.1	8000000	9000000	0.00600299042979475
OX359190.1	9000000	10000000	0.00662680349058679
OX359190.1	10000000	10288994	0.00714134552742634
OX359191.1	0	1000000	0.00493517738560085
OX359191.1	1000000	2000000	0.00636538293961185
OX359191.1	2000000	3000000	0.0059780932344638
OX359191.1	3000000	4000000	0.00242885972228562
OX359191.1	4000000	5000000	0.00593106519883869
OX359191.1	5000000	6000000	0.00729764458700394
OX359191.1	6000000	7000000	0.00537502783644756
OX359191.1	7000000	8000000	0.00605140164293826
OX359191.1	8000000	9000000	0.00738478477066225
OX359191.1	9000000	9415654	0.00792284082531436
OX359192.1	0	1000000	0.00674575675716797
OX359192.1	1000000	2000000	0.00562676614479379
OX359192.1	2000000	3000000	0.00568071006801084
OX359192.1	3000000	4000000	0.00193368217070347
OX359192.1	4000000	5000000	0.00242885972228562
OX359192.1	5000000	6000000	0.00834332679090367
OX359192.1	6000000	7000000	0.00740138290088288
OX359192.1	7000000	8000000	0.00728381281182008
OX359192.1	8000000	8959380	0.00769599971229908
OX359193.1	0	1000000	0.00757428009068112
OX359193.1	1000000	2000000	0.00713442963983441
OX359193.1	2000000	3000000	0.00815383147088481
OX359193.1	3000000	4000000	0.00598500912205573
OX359193.1	4000000	5000000	0.00792975671290629
OX359193.1	5000000	6000000	0.00752863523257438
OX359193.1	6000000	7000000	0.00771951373011164
OX359193.1	7000000	8000000	0.00774164457040581
OX359193.1	8000000	8804818	0.00671947638431864
OX359194.1	0	1000000	0.0051454203683955
OX359194.1	1000000	2000000	0.00516616803117129
OX359194.1	2000000	3000000	0.00541652316199913
OX359194.1	3000000	4000000	0.0067429904021312
OX359194.1	4000000	5000000	0.00486186897712639
OX359194.1	5000000	6000000	0.00549121474799197
OX359194.1	6000000	7000000	0.00574018670130143
OX359194.1	7000000	8000000	0.00757013055812596
OX359194.1	8000000	8731016	0.00735712122029453
OX359195.1	0	1000000	0.00455480356804473
OX359195.1	1000000	2000000	0.00404579424127872
OX359195.1	2000000	3000000	0.00348560734633244
OX359195.1	3000000	4000000	0.00377054191511993
OX359195.1	4000000	5000000	0.00698089693529357
OX359195.1	5000000	6000000	0.00653966330692848
OX359195.1	6000000	7000000	0.00684811189352853
OX359195.1	7000000	8000000	0.0069684483376281
OX359195.1	8000000	8459200	0.00659360723014552
OX359196.1	0	1000000	0.00672639227191057
OX359196.1	1000000	2000000	0.00621599976762618
OX359196.1	2000000	3000000	0.00674022404709443
OX359196.1	3000000	4000000	0.00642762592793922
OX359196.1	4000000	5000000	0.00735020533270261
OX359196.1	5000000	6000000	0.00814829876081126
OX359196.1	6000000	7000000	0.00758811186586498
OX359196.1	7000000	8000000	0.00707910253909897
OX359196.1	8000000	8125224	0.00811786885540677
OX359197.1	0	1000000	0.0060762988382692
OX359197.1	1000000	2000000	0.00546078484258748
OX359197.1	2000000	3000000	0.00682874740827112
OX359197.1	3000000	4000000	0.00348975687888759
OX359197.1	4000000	5000000	0.00701962590580838
OX359197.1	5000000	6000000	0.00563921474245926
OX359197.1	6000000	7000000	0.00691450441441105
OX359197.1	7000000	7704672	0.00605278482045664
OX359198.1	0	1000000	0.00496975682356049
OX359198.1	1000000	2000000	0.00363360734079973
OX359198.1	2000000	3000000	0.00588680351825034
OX359198.1	3000000	4000000	0.00514680354591389
OX359198.1	4000000	5000000	0.0073114763621878
OX359198.1	5000000	6000000	0.00709985020187476
OX359198.1	6000000	7000000	0.0072229530010111
OX359198.1	7000000	7657449	0.00756321467053403
OX359199.1	0	1000000	0.00531416802563858
OX359199.1	1000000	2000000	0.00517170074124483
OX359199.1	2000000	3000000	0.00582594370744136
OX359199.1	3000000	4000000	0.00435839236043393
OX359199.1	4000000	5000000	0.007781756718439
OX359199.1	5000000	6000000	0.00726859785911784
OX359199.1	6000000	7000000	0.00793252306794306
OX359199.1	7000000	7633987	0.00792837353538791
OX359200.1	0	1000000	0.00737371935051517
OX359200.1	1000000	2000000	0.00698642964536712
OX359200.1	2000000	3000000	0.00714826141501826
OX359200.1	3000000	4000000	0.00358796248269299
OX359200.1	4000000	5000000	0.00512052317306455
OX359200.1	5000000	6000000	0.00498220542122597
OX359200.1	6000000	7000000	0.00608044837082436
OX359200.1	7000000	7521688	0.00634878480939122
OX359201.1	0	1000000	0.00552164465339646
OX359201.1	1000000	2000000	0.00560325212698123
OX359201.1	2000000	3000000	0.00569869137574986
OX359201.1	3000000	4000000	0.00481760729653804
OX359201.1	4000000	5000000	0.00555899044639288
OX359201.1	5000000	6000000	0.00711921468713216
OX359201.1	6000000	6903244	0.00790347634005696
OX359202.1	0	1000000	0.00634325209931768
OX359202.1	1000000	2000000	0.00651061657904237
OX359202.1	2000000	3000000	0.00747330813183895
OX359202.1	3000000	4000000	0.0068799249764514
OX359202.1	4000000	5000000	0.00722018664597433
OX359202.1	5000000	6000000	0.00702930814843708
OX359202.1	6000000	6754398	0.00775409316807128
OX359203.1	0	17451	0.24463569178932

## Sheet: Hapan_M.regions.normalised
OY776060.1	0	1000000	0.00626041175047852
OY776060.1	1000000	2000000	0.00696154887895058
OY776060.1	2000000	3000000	0.00574407045431693
OY776060.1	3000000	4000000	0.00622236554970872
OY776060.1	4000000	5000000	0.00651405308894386
OY776060.1	5000000	6000000	0.00678309408010175
OY776060.1	6000000	7000000	0.00727678882818608
OY776060.1	7000000	8000000	0.00329914912389564
OY776060.1	8000000	9000000	0.0073130233051097
OY776060.1	9000000	10000000	0.0041144248546771
OY776060.1	10000000	11000000	0.00662456824356091
OY776060.1	11000000	12000000	0.00449307513852893
OY776060.1	12000000	13000000	0.00439343032698898
OY776060.1	13000000	14000000	0.00467062407545468
OY776060.1	14000000	15000000	0.00506557987392214
OY776060.1	15000000	16000000	0.00513080193238465
OY776060.1	16000000	17000000	0.0050981909031534
OY776060.1	17000000	18000000	0.00553934565969847
OY776060.1	18000000	18138809	0.00796614975165795
OY776061.1	0	1000000	0.00863467585089875
OY776061.1	1000000	2000000	0.00877689617282396
OY776061.1	2000000	3000000	0.0079145156220418
OY776061.1	3000000	4000000	0.00405192038198386
OY776061.1	4000000	5000000	0.00341147600235886
OY776061.1	5000000	6000000	0.00918634576206087
OY776061.1	6000000	7000000	0.0084199865751263
OY776061.1	7000000	8000000	0.00858666516897496
OY776061.1	8000000	8642571	0.00809387628281372
OY776062.1	0	1000000	0.00580295147931781
OY776062.1	1000000	2000000	0.0062531648550938
OY776062.1	2000000	3000000	0.00695701956933513
OY776062.1	3000000	4000000	0.00863829929859111
OY776062.1	4000000	5000000	0.00656296963279075
OY776062.1	5000000	6000000	0.00741357397857274
OY776062.1	6000000	7000000	0.00734654019626404
OY776062.1	7000000	8000000	0.00747245500357363
OY776062.1	8000000	8483533	0.0076273573924221
OY776063.1	0	1000000	0.00610460349970695
OY776063.1	1000000	2000000	0.00684922200048735
OY776063.1	2000000	3000000	0.0058998787050885
OY776063.1	3000000	4000000	0.0076654035931919
OY776063.1	4000000	5000000	0.00912384128936763
OY776063.1	5000000	6000000	0.0068066464901021
OY776063.1	6000000	7000000	0.00676044753202448
OY776063.1	7000000	7813905	0.00785110528742546
OY776064.1	0	1000000	0.00748241948472762
OY776064.1	1000000	2000000	0.00708927541010634
OY776064.1	2000000	3000000	0.00618431934893892
OY776064.1	3000000	4000000	0.00800238422858158
OY776064.1	4000000	5000000	0.00758568774395994
OY776064.1	5000000	6000000	0.00511630814161521
OY776064.1	6000000	7000000	0.00582106871777962
OY776064.1	7000000	7597148	0.00843266864204957
OY776065.1	0	1000000	0.00542973636700452
OY776065.1	1000000	2000000	0.00728856503318625
OY776065.1	2000000	3000000	0.00767899152203826
OY776065.1	3000000	4000000	0.00672240133125468
OY776065.1	4000000	5000000	0.00653760549894422
OY776065.1	5000000	6000000	0.00731664675280206
OY776065.1	6000000	7000000	0.00779675357204003
OY776065.1	7000000	7592338	0.00883215375013248
OY776066.1	0	1000000	0.00793806803204215
OY776066.1	1000000	2000000	0.00712460402510687
OY776066.1	2000000	3000000	0.00257174199965396
OY776066.1	3000000	4000000	0.00712007471549142
OY776066.1	4000000	5000000	0.00739545674011093
OY776066.1	5000000	6000000	0.00782664701550202
OY776066.1	6000000	7000000	0.00640806724394228
OY776066.1	7000000	7363180	0.0071979788408772
OY776067.1	0	1000000	0.00772881392780824
OY776067.1	1000000	2000000	0.00781124736280948
OY776067.1	2000000	3000000	0.00596600662547411
OY776067.1	3000000	4000000	0.00828138970089345
OY776067.1	4000000	5000000	0.0075802525724214
OY776067.1	5000000	6000000	0.00633469242817194
OY776067.1	6000000	7000000	0.00747970189895835
OY776067.1	7000000	7091591	0.00790364527896471
OY776068.1	0	1000000	0.00647147757855861
OY776068.1	1000000	2000000	0.00803771284358211
OY776068.1	2000000	3000000	0.00868812170436109
OY776068.1	3000000	4000000	0.00799876078088921
OY776068.1	4000000	5000000	0.00883577719782485
OY776068.1	5000000	6000000	0.00903597268282785
OY776068.1	6000000	7000000	0.00888197615590246
OY776068.1	7000000	7054234	0.00692350267818078
OY776069.1	0	1000000	0.00786197563050255
OY776069.1	1000000	2000000	0.00729490606664789
OY776069.1	2000000	3000000	0.00746611397011199
OY776069.1	3000000	4000000	0.00907220715975147
OY776069.1	4000000	5000000	0.00699234818433566
OY776069.1	5000000	6000000	0.00609826246624532
OY776069.1	6000000	6998024	0.00689904440625733
OY776070.1	0	1000000	0.00807122973473645
OY776070.1	1000000	2000000	0.00613359108124585
OY776070.1	2000000	3000000	0.00719888470280029
OY776070.1	3000000	4000000	0.00836110555012542
OY776070.1	4000000	5000000	0.00804948904858228
OY776070.1	5000000	6000000	0.00660192169548364
OY776070.1	6000000	6808682	0.00553119290239066
OY776071.1	0	1000000	0.00808028835396736
OY776071.1	1000000	2000000	0.00440248894621988
OY776071.1	2000000	3000000	0.00846165622358846
OY776071.1	3000000	4000000	0.00922258023898449
OY776071.1	4000000	5000000	0.00816362765089169
OY776071.1	5000000	6000000	0.00626675278394016
OY776071.1	6000000	6759720	0.00585549147085706
OY776072.1	0	1000000	0.00845893863781919
OY776072.1	1000000	2000000	0.00882218926897849
OY776072.1	2000000	3000000	0.00948256261091147
OY776072.1	3000000	4000000	0.00954778466937399
OY776072.1	4000000	5000000	0.00766721531703809
OY776072.1	5000000	6000000	0.00673417753625486
OY776072.1	6000000	6571531	0.00716717953549212
OY776073.1	0	1000000	0.00725685986587808
OY776073.1	1000000	2000000	0.00644248999701972
OY776073.1	2000000	3000000	0.00735650467741804
OY776073.1	3000000	4000000	0.00814098110281442
OY776073.1	4000000	5000000	0.00836744658358705
OY776073.1	5000000	6000000	0.00713275678241468
OY776073.1	6000000	6511711	0.00898615027705787
OY776074.1	0	1000000	0.00845712691397301
OY776074.1	1000000	2000000	0.007856540458964
OY776074.1	2000000	3000000	0.00868178067089946
OY776074.1	3000000	4000000	0.00908307750282855
OY776074.1	4000000	5000000	0.0069597371551044
OY776074.1	5000000	5981790	0.0079326328605036
OY776075.1	0	1000000	0.00882762444051703
OY776075.1	1000000	2000000	0.00869536859974582
OY776075.1	2000000	3000000	0.0093648005609097
OY776075.1	3000000	4000000	0.00931135470744736
OY776075.1	4000000	5000000	0.00647781861202025
OY776075.1	5000000	5828375	0.00805401835819773
OY776076.1	0	1000000	0.00833302383050961
OY776076.1	1000000	2000000	0.00766902704088427
OY776076.1	2000000	3000000	0.0082197910901233
OY776076.1	3000000	4000000	0.00785563459704091
OY776076.1	4000000	5000000	0.00824334350012365
OY776076.1	5000000	5741248	0.00778769495280912
CAVLYH010000005.1	0	143000	0.001825593

## Sheet: Hapan_F.regions.normalised
OY776060.1	0	1000000	0.007004736
OY776060.1	1000000	2000000	0.008324199
OY776060.1	2000000	3000000	0.006721403
OY776060.1	3000000	4000000	0.00584245
OY776060.1	4000000	5000000	0.00654251
OY776060.1	5000000	6000000	0.007216719
OY776060.1	6000000	7000000	0.0066697
OY776060.1	7000000	8000000	0.003468244
OY776060.1	8000000	9000000	0.007383203
OY776060.1	9000000	10000000	0.005200298
OY776060.1	10000000	11000000	0.006747255
OY776060.1	11000000	12000000	0.004426819
OY776060.1	12000000	13000000	0.003634728
OY776060.1	13000000	14000000	0.004421649
OY776060.1	14000000	15000000	0.005486733
OY776060.1	15000000	16000000	0.005419519
OY776060.1	16000000	17000000	0.005750419
OY776060.1	17000000	18000000	0.006100966
OY776060.1	18000000	18138809	0.007663433
OY776061.1	0	1000000	0.008485513
OY776061.1	1000000	2000000	0.00851033
OY776061.1	2000000	3000000	0.008492751
OY776061.1	3000000	4000000	0.003972866
OY776061.1	4000000	5000000	0.003942878
OY776061.1	5000000	6000000	0.009179368
OY776061.1	6000000	7000000	0.008213554
OY776061.1	7000000	8000000	0.008496887
OY776061.1	8000000	8642571	0.008479308
OY776062.1	0	1000000	0.005814531
OY776062.1	1000000	2000000	0.006070978
OY776062.1	2000000	3000000	0.007432838
OY776062.1	3000000	4000000	0.008704734
OY776062.1	4000000	5000000	0.006791719
OY776062.1	5000000	6000000	0.006962339
OY776062.1	6000000	7000000	0.006890989
OY776062.1	7000000	8000000	0.00784336
OY776062.1	8000000	8483533	0.007476268
OY776063.1	0	1000000	0.006187827
OY776063.1	1000000	2000000	0.006569396
OY776063.1	2000000	3000000	0.005694579
OY776063.1	3000000	4000000	0.007624139
OY776063.1	4000000	5000000	0.008453457
OY776063.1	5000000	6000000	0.007222923
OY776063.1	6000000	7000000	0.006753459
OY776063.1	7000000	7813905	0.007902302
OY776064.1	0	1000000	0.00753521
OY776064.1	1000000	2000000	0.007007838
OY776064.1	2000000	3000000	0.006177486
OY776064.1	3000000	4000000	0.008013981
OY776064.1	4000000	5000000	0.007645854
OY776064.1	5000000	6000000	0.005489835
OY776064.1	6000000	7000000	0.006218849
OY776064.1	7000000	7597148	0.007345976
OY776065.1	0	1000000	0.005280955
OY776065.1	1000000	2000000	0.007084359
OY776065.1	2000000	3000000	0.006978884
OY776065.1	3000000	4000000	0.005952061
OY776065.1	4000000	5000000	0.006322255
OY776065.1	5000000	6000000	0.006711062
OY776065.1	6000000	7000000	0.008817447
OY776065.1	7000000	7592338	0.009161789
OY776066.1	0	1000000	0.007798896
OY776066.1	1000000	2000000	0.007243604
OY776066.1	2000000	3000000	0.0025076
OY776066.1	3000000	4000000	0.007046098
OY776066.1	4000000	5000000	0.007184663
OY776066.1	5000000	6000000	0.008330403
OY776066.1	6000000	7000000	0.008527909
OY776066.1	7000000	7363180	0.007495915
OY776067.1	0	1000000	0.00760139
OY776067.1	1000000	2000000	0.007526937
OY776067.1	2000000	3000000	0.006695551
OY776067.1	3000000	4000000	0.008445184
OY776067.1	4000000	5000000	0.007835088
OY776067.1	5000000	6000000	0.006601452
OY776067.1	6000000	7000000	0.006987157
OY776067.1	7000000	7091591	0.008191839
OY776068.1	0	1000000	0.006220917
OY776068.1	1000000	2000000	0.007775112
OY776068.1	2000000	3000000	0.008508262
OY776068.1	3000000	4000000	0.007449383
OY776068.1	4000000	5000000	0.008580646
OY776068.1	5000000	6000000	0.008782289
OY776068.1	6000000	7000000	0.008695427
OY776068.1	7000000	7054234	0.006616963
OY776069.1	0	1000000	0.007671706
OY776069.1	1000000	2000000	0.007451451
OY776069.1	2000000	3000000	0.007219821
OY776069.1	3000000	4000000	0.008810208
OY776069.1	4000000	5000000	0.00724257
OY776069.1	5000000	6000000	0.006388435
OY776069.1	6000000	6998024	0.006876512
OY776070.1	0	1000000	0.007851633
OY776070.1	1000000	2000000	0.00686824
OY776070.1	2000000	3000000	0.007177424
OY776070.1	3000000	4000000	0.008419333
OY776070.1	4000000	5000000	0.007520733
OY776070.1	5000000	6000000	0.006801026
OY776070.1	6000000	6808682	0.006175418
OY776071.1	0	1000000	0.00806982
OY776071.1	1000000	2000000	0.00407317
OY776071.1	2000000	3000000	0.008250781
OY776071.1	3000000	4000000	0.009284843
OY776071.1	4000000	5000000	0.008442082
OY776071.1	5000000	6000000	0.00596447
OY776071.1	6000000	6759720	0.006252973
OY776072.1	0	1000000	0.00863752
OY776072.1	1000000	2000000	0.008503092
OY776072.1	2000000	3000000	0.0092714
OY776072.1	3000000	4000000	0.008581681
OY776072.1	4000000	5000000	0.007382169
OY776072.1	5000000	6000000	0.006979919
OY776072.1	6000000	6571531	0.007123653
OY776073.1	0	1000000	0.007184663
OY776073.1	1000000	2000000	0.006552851
OY776073.1	2000000	3000000	0.007201208
OY776073.1	3000000	4000000	0.007850599
OY776073.1	4000000	5000000	0.008185635
OY776073.1	5000000	6000000	0.006534238
OY776073.1	6000000	6511711	0.008548591
OY776074.1	0	1000000	0.008363493
OY776074.1	1000000	2000000	0.007488677
OY776074.1	2000000	3000000	0.008763675
OY776074.1	3000000	4000000	0.009014953
OY776074.1	4000000	5000000	0.006938556
OY776074.1	5000000	5981790	0.007734784
OY776075.1	0	1000000	0.00853825
OY776075.1	1000000	2000000	0.00840589
OY776075.1	2000000	3000000	0.009213492
OY776075.1	3000000	4000000	0.009318967
OY776075.1	4000000	5000000	0.006619031
OY776075.1	5000000	5828375	0.008512398
OY776076.1	0	1000000	0.008167022
OY776076.1	1000000	2000000	0.007196037
OY776076.1	2000000	3000000	0.008475172
OY776076.1	3000000	4000000	0.007646889
OY776076.1	4000000	5000000	0.008030526
OY776076.1	5000000	5741248	0.007635514
CAVLYH010000005.1	0	143000	0.00219964

## Sheet: Olob_M.regions.normalised
OX382150.1	0	1000000	0.0074417595530605
OX382150.1	1000000	2000000	0.00756651208201123
OX382150.1	2000000	3000000	0.00743633553006265
OX382150.1	3000000	4000000	0.0059610012746454
OX382150.1	4000000	5000000	0.00628644265451685
OX382150.1	5000000	6000000	0.00732243104710764
OX382150.1	6000000	7000000	0.00616711414856399
OX382150.1	7000000	7397985	0.00724649472513763
OX382151.1	0	1000000	0.00798416185284626
OX382151.1	1000000	2000000	0.00768584058796409
OX382151.1	2000000	3000000	0.00823909093374556
OX382151.1	3000000	4000000	0.00800043392183983
OX382151.1	4000000	4122402	0.00678002874732189
OX382152.1	0	1000000	0.00821197081875627
OX382152.1	1000000	2000000	0.00800043392183983
OX382152.1	2000000	3000000	0.00775092886393838
OX382152.1	3000000	4000000	0.00856995633661487
OX382152.1	4000000	4000095	0.00622677840154042
OX382153.1	0	1000000	0.00882488541751417
OX382153.1	1000000	2000000	0.00856995633661487
OX382153.1	2000000	3000000	0.00875437311854202
OX382153.1	3000000	3662450	0.00829875518672199
OX382154.1	0	1000000	0.00874894909554416
OX382154.1	1000000	2000000	0.00835299541670057
OX382154.1	2000000	3000000	0.00960052070620779
OX382154.1	3000000	3616715	0.00786483334689339
OX382155.1	0	1000000	0.0129579909418816
OX382155.1	1000000	2000000	0.00770211265695767
OX382155.1	2000000	3000000	0.00254386678599517
OX382155.1	3000000	3595068	0.0019146801182437
OX382156.1	0	1000000	0.00881403737151846
OX382156.1	1000000	2000000	0.0104900604778564
OX382156.1	2000000	3000000	0.00856995633661487
OX382156.1	3000000	3501993	0.00803297805982697
OX382157.1	0	1000000	0.00864589265858487
OX382157.1	1000000	2000000	0.00934016760231063
OX382157.1	2000000	3000000	0.0077997450709191
OX382157.1	3000000	3475296	0.00795161771485911
OX382158.1	0	1000000	0.00749057576004122
OX382158.1	1000000	2000000	0.00728988690912049
OX382158.1	2000000	3000000	0.00557047161879966
OX382158.1	3000000	3311771	0.00703495782822119
OX382159.1	0	1000000	0.00839096357768557
OX382159.1	1000000	2000000	0.00864589265858487
OX382159.1	2000000	3000000	0.00559759173378895
OX382159.1	3000000	3220065	0.00694274943725761
OX382160.1	0	1000000	0.0086296205895913
OX382160.1	1000000	2000000	0.0110107666856507
OX382160.1	2000000	3000000	0.0074037913920755
OX382160.1	3000000	3219028	0.00851571610663629
OX382161.1	0	1000000	0.00718140644916334
OX382161.1	1000000	2000000	0.00666070024136902
OX382161.1	2000000	2738375	0.00852656415263201
OX382162.1	0	1000000	0.00811976242779269
OX382162.1	1000000	2000000	0.00699156564423833
OX382162.1	2000000	2691851	0.00860250047460201
OX382163.1	0	1000000	0.00726819081712906
OX382163.1	1000000	2000000	0.00849944403764272
OX382163.1	2000000	2577018	0.00859707645160415
OX382164.1	0	1000000	0.00864046863558701
OX382164.1	1000000	2000000	0.00738751932308193
OX382164.1	2000000	2484334	0.00830417920971985
OX382165.1	0	1000000	0.00800585794483769
OX382165.1	1000000	2000000	0.00920999105036205
OX382165.1	2000000	2474678	0.00870013288856345
OX382166.1	0	1000000	0.00787025736989125
OX382166.1	1000000	2000000	0.0054891112738318
OX382166.1	2000000	2385626	0.00530469449190465
OX382167.1	0	1000000	0.00811433840479484
OX382167.1	1000000	2000000	0.00867843679657202
OX382167.1	2000000	2328717	0.00716513438016977
OX382168.1	0	1000000	0.00613457001057684
OX382168.1	1000000	2000000	0.00849944403764272
OX382168.1	2000000	2167890	0.00712716621918477
OX382169.1	0	1000000	0.00683969300029832
OX382169.1	1000000	2000000	0.00819027472676484
OX382169.1	2000000	2097693	0.00890624576248203
CANNPT010000001.1	0	179342	0.0106310850758007
OX382170.1	0	20260	0.391175114582486

## Sheet: Olob_F.regions.normalised
OX382150.1	0	1000000	0.00990453829281102
OX382150.1	1000000	2000000	0.00972226513021718
OX382150.1	2000000	3000000	0.00983657202879298
OX382150.1	3000000	4000000	0.00838765485495381
OX382150.1	4000000	5000000	0.00812196855015601
OX382150.1	5000000	6000000	0.0104173746485835
OX382150.1	6000000	7000000	0.00863171553029133
OX382150.1	7000000	7397985	0.00852049800735271
OX382151.1	0	1000000	0.010324693379468
OX382151.1	1000000	2000000	0.0106398096944607
OX382151.1	2000000	3000000	0.0105625753035312
OX382151.1	3000000	4000000	0.0106150946893633
OX382151.1	4000000	4122402	0.00909821125150607
OX382152.1	0	1000000	0.0112885785782693
OX382152.1	1000000	2000000	0.0109085853748957
OX382152.1	2000000	3000000	0.0102289227347153
OX382152.1	3000000	4000000	0.0108591553647008
OX382152.1	4000000	4000095	0.00786555037226976
OX382153.1	0	1000000	0.0113874385986592
OX382153.1	1000000	2000000	0.0108529766134264
OX382153.1	2000000	3000000	0.0115388180048812
OX382153.1	3000000	3662450	0.0107973678519571
OX382154.1	0	1000000	0.0111897185578795
OX382154.1	1000000	2000000	0.0108159041057802
OX382154.1	2000000	3000000	0.00698198894003522
OX382154.1	3000000	3616715	0.0105440390497081
OX382155.1	0	1000000	0.0139485310018845
OX382155.1	1000000	2000000	0.0103463190089283
OX382155.1	2000000	3000000	0.00204516667181563
OX382155.1	3000000	3595068	0.00195248540270011
OX382156.1	0	1000000	0.0112267910655257
OX382156.1	1000000	2000000	0.0110105347709228
OX382156.1	2000000	3000000	0.0114492261114029
OX382156.1	3000000	3501993	0.0104359109024066
OX382157.1	0	1000000	0.0112113441873397
OX382157.1	1000000	2000000	0.0111742716796935
OX382157.1	2000000	3000000	0.0105347709227965
OX382157.1	3000000	3475296	0.0103216040038308
OX382158.1	0	1000000	0.00989218079026229
OX382158.1	1000000	2000000	0.00982112515060706
OX382158.1	2000000	3000000	0.0080292872810405
OX382158.1	3000000	3311771	0.00912910500787791
OX382159.1	0	1000000	0.0109333003799932
OX382159.1	1000000	2000000	0.0113194723346412
OX382159.1	2000000	3000000	0.00889431245945194
OX382159.1	3000000	3220065	0.00936080818066669
OX382160.1	0	1000000	0.0112453273193488
OX382160.1	1000000	2000000	0.0107015972072044
OX382160.1	2000000	3000000	0.00966047761747351
OX382160.1	3000000	3219028	0.0101084370848651
OX382161.1	0	1000000	0.00894992122092125
OX382161.1	1000000	2000000	0.00915690938861256
OX382161.1	2000000	2738375	0.0106120053137261
OX382162.1	0	1000000	0.0104173746485835
OX382162.1	1000000	2000000	0.0083135098396614
OX382162.1	2000000	2691851	0.0113689023448361
OX382163.1	0	1000000	0.0101485989681485
OX382163.1	1000000	2000000	0.011266952948809
OX382163.1	2000000	2577018	0.0105409496740709
OX382164.1	0	1000000	0.0106521671970095
OX382164.1	1000000	2000000	0.0101794927245204
OX382164.1	2000000	2484334	0.0117643424263956
OX382165.1	0	1000000	0.0113132935833668
OX382165.1	1000000	2000000	0.0112484166949859
OX382165.1	2000000	2474678	0.0110970372887639
OX382166.1	0	1000000	0.010661435323921
OX382166.1	1000000	2000000	0.00855757051499892
OX382166.1	2000000	2385626	0.00819920294108561
OX382167.1	0	1000000	0.0103617658871142
OX382167.1	1000000	2000000	0.011433779233217
OX382167.1	2000000	2328717	0.0101362414655998
OX382168.1	0	1000000	0.00700361456949551
OX382168.1	1000000	2000000	0.0110630541567549
OX382168.1	2000000	2167890	0.00979949952114677
OX382169.1	0	1000000	0.00989218079026229
OX382169.1	1000000	2000000	0.010661435323921
OX382169.1	2000000	2097693	0.0122030337668757
CANNPT010000001.1	0	179342	0.00298742624115666
OX382170.1	0	20260	0.225215483950694

## Sheet: Petfic_M.regions.normalised
OX345636.1	0	1000000	0.00329991961164876
OX345636.1	1000000	2000000	0.00295793601797857
OX345636.1	2000000	3000000	0.00544064808111673
OX345636.1	3000000	4000000	0.00417042330462744
OX345636.1	4000000	5000000	0.00436140115563807
OX345636.1	5000000	6000000	0.00540067597276567
OX345636.1	6000000	7000000	0.00290019852813814
OX345636.1	7000000	8000000	0.00184315832952118
OX345636.1	8000000	9000000	0.00369964069515938
OX345636.1	9000000	10000000	0.00482330107436145
OX345636.1	10000000	11000000	0.00579595571090395
OX345636.1	11000000	12000000	0.00459235111499976
OX345636.1	12000000	13000000	0.00482330107436145
OX345636.1	13000000	14000000	0.00401053487122319
OX345636.1	14000000	15000000	0.00393947334526575
OX345636.1	15000000	16000000	0.00596472683505287
OX345636.1	16000000	17000000	0.00449020017143593
OX345636.1	17000000	18000000	0.00357528302473385
OX345636.1	18000000	19000000	0.00542288269962737
OX345636.1	19000000	20000000	0.00490768663643591
OX345636.1	20000000	21000000	0.00501427892537207
OX345636.1	21000000	22000000	0.00444578671771253
OX345636.1	22000000	23000000	0.0042103954129785
OX345636.1	23000000	24000000	0.00526299426622312
OX345636.1	24000000	25000000	0.00426813290281892
OX345636.1	25000000	26000000	0.00409492043329765
OX345636.1	26000000	27000000	0.0042326021398402
OX345636.1	27000000	28000000	0.00353531091638279
OX345636.1	28000000	29000000	0.00591143069058479
OX345636.1	29000000	30000000	0.00480109434749974
OX345636.1	30000000	31000000	0.00401053487122319
OX345636.1	31000000	32000000	0.00484994914659549
OX345636.1	32000000	33000000	0.00315779655973387
OX345636.1	33000000	34000000	0.00487659721882953
OX345636.1	34000000	35000000	0.00538735193664865
OX345636.1	35000000	36000000	0.00436140115563807
OX345636.1	36000000	37000000	0.0057026874580848
OX345636.1	37000000	38000000	0.00448131748069125
OX345636.1	38000000	39000000	0.00554279902468056
OX345636.1	39000000	40000000	0.005183050049521
OX345636.1	40000000	41000000	0.00403274159808489
OX345636.1	41000000	42000000	0.00426369155744658
OX345636.1	42000000	43000000	0.00398388679898915
OX345636.1	43000000	44000000	0.00437472519175509
OX345636.1	44000000	45000000	0.00429033962968062
OX345636.1	45000000	46000000	0.00371740607664874
OX345636.1	46000000	47000000	0.00366410993218066
OX345636.1	47000000	48000000	0.00458790976962742
OX345636.1	48000000	49000000	0.00377070222111682
OX345636.1	49000000	50000000	0.00107480558010633
OX345636.1	50000000	51000000	0.00299346678095729
OX345636.1	51000000	52000000	0.00254044955297859
OX345636.1	52000000	53000000	0.00491656932718059
OX345636.1	53000000	54000000	0.0037351714581381
OX345636.1	54000000	55000000	0.00425925021207424
OX345636.1	55000000	56000000	0.00478777031138272
OX345636.1	56000000	57000000	0.0022872928667552
OX345636.1	57000000	58000000	0.00268257260489347
OX345636.1	58000000	59000000	0.0024427399547871
OX345636.1	59000000	60000000	0.00177209680356374
OX345636.1	60000000	61000000	0.00217181788707435
OX345636.1	61000000	62000000	0.00229617555749988
OX345636.1	62000000	63000000	0.00367743396829768
OX345636.1	63000000	63279122	0.00368631665904236
OX345637.1	0	1000000	0.00465897129558486
OX345637.1	1000000	2000000	0.00600025759803159
OX345637.1	2000000	3000000	0.00327327153941472
OX345637.1	3000000	4000000	0.00344648400893599
OX345637.1	4000000	5000000	0.00492545201792527
OX345637.1	5000000	6000000	0.00523634619398908
OX345637.1	6000000	7000000	0.00495654143553165
OX345637.1	7000000	8000000	0.00594696145356351
OX345637.1	8000000	9000000	0.00548950288021247
OX345637.1	9000000	10000000	0.00442802133622317
OX345637.1	10000000	11000000	0.00464564725946784
OX345637.1	11000000	12000000	0.00437472519175509
OX345637.1	12000000	13000000	0.00793224283499958
OX345637.1	13000000	14000000	0.00920246761148887
OX345637.1	14000000	15000000	0.00500095488925505
OX345637.1	15000000	15999405	0.00520969812175504
OX345638.1	0	1000000	0.00592475472670181
OX345638.1	1000000	2000000	0.00525855292085078
OX345638.1	2000000	3000000	0.00581372109239331
OX345638.1	3000000	4000000	0.00534737982829759
OX345638.1	4000000	5000000	0.00455237900664869
OX345638.1	5000000	6000000	0.00527631830234014
OX345638.1	6000000	7000000	0.00231394093898924
OX345638.1	7000000	8000000	0.00530296637457419
OX345638.1	8000000	9000000	0.00411712716015936
OX345638.1	9000000	10000000	0.00174100738595735
OX345638.1	10000000	11000000	0.00228285152138286
OX345638.1	11000000	11427112	0.00659095653255284
OX345639.1	0	1000000	0.00687076129101027
OX345639.1	1000000	2000000	0.006044671051755
OX345639.1	2000000	3000000	0.00578263167478693
OX345639.1	3000000	4000000	0.00677305169281879
OX345639.1	4000000	5000000	0.00711059394111664
OX345639.1	5000000	6000000	0.00609796719622308
OX345639.1	6000000	7000000	0.00612905661382946
OX345639.1	7000000	8000000	0.00497430681702101
OX345639.1	8000000	9000000	0.0069951189614358
OX345639.1	9000000	9942894	0.00711503528648898
OX345640.1	0	1000000	0.00556056440616992
OX345640.1	1000000	2000000	0.00496986547164867
OX345640.1	2000000	3000000	0.00531629041069121
OX345640.1	3000000	4000000	0.00650657097047838
OX345640.1	4000000	5000000	0.00497430681702101
OX345640.1	5000000	6000000	0.00640442002691455
OX345640.1	6000000	7000000	0.00406827236106361
OX345640.1	7000000	8000000	0.00578707302015927
OX345640.1	8000000	8526170	0.00536958655515929
OX345641.1	0	1000000	0.0047300328215423
OX345641.1	1000000	2000000	0.00435695981026573
OX345641.1	2000000	3000000	0.00306452830691473
OX345641.1	3000000	4000000	0.00491656932718059
OX345641.1	4000000	5000000	0.00623564890276563
OX345641.1	5000000	6000000	0.00210963905186159
OX345641.1	6000000	7000000	0.0033043609570211
OX345641.1	7000000	8000000	0.00556056440616992
OX345641.1	8000000	8186180	0.00375293683962746
OX345642.1	0	1000000	0.00553391633393588
OX345642.1	1000000	2000000	0.00588922396372309
OX345642.1	2000000	3000000	0.00629782773797839
OX345642.1	3000000	4000000	0.00504536834297845
OX345642.1	4000000	5000000	0.00463232322335082
OX345642.1	5000000	6000000	0.00519193274026568
OX345642.1	6000000	7000000	0.005183050049521
OX345642.1	7000000	7587133	0.00654654307882944
OX345643.1	0	1000000	0.00644439213526561
OX345643.1	1000000	2000000	0.00457014438813805
OX345643.1	2000000	3000000	0.00633779984632945
OX345643.1	3000000	4000000	0.00494765874478697
OX345643.1	4000000	5000000	0.00569824611271246
OX345643.1	5000000	6000000	0.00547173749872311
OX345643.1	6000000	7000000	0.0065198950065954
OX345643.1	7000000	7091006	0.00390838392765937
OX345644.1	0	1000000	0.00614682199531882
OX345644.1	1000000	2000000	0.00555168171542524
OX345644.1	2000000	3000000	0.00518749139489334
OX345644.1	3000000	4000000	0.0055250336431912
OX345644.1	4000000	5000000	0.00512531255968058
OX345644.1	5000000	6000000	0.00584036916462735
OX345644.1	6000000	7000000	0.00601802297952096
OX345644.1	7000000	7016685	0.000906034455957399
OX345645.1	0	1000000	0.00620455948515924
OX345645.1	1000000	2000000	0.0060890845054784
OX345645.1	2000000	3000000	0.00442357999085083
OX345645.1	3000000	4000000	0.0056804807312231
OX345645.1	4000000	5000000	0.0143944003517546
OX345645.1	5000000	6000000	0.00422816079446786
OX345645.1	6000000	6870705	0.00497430681702101
OX345646.1	0	1000000	0.00605799508787202
OX345646.1	1000000	2000000	0.00535182117366993
OX345646.1	2000000	3000000	0.00426369155744658
OX345646.1	3000000	4000000	0.00290908121888282
OX345646.1	4000000	5000000	0.00445022806308487
OX345646.1	5000000	6000000	0.00629782773797839
OX345646.1	6000000	6121522	0.0014034651376595
OX345647.1	0	1000000	0.00624009024813797
OX345647.1	1000000	2000000	0.00505869237909548
OX345647.1	2000000	3000000	0.00333100902925514
OX345647.1	3000000	4000000	0.00541844135425503
OX345647.1	4000000	5000000	0.00523190484861674
OX345647.1	5000000	6000000	0.00611573257771244
OX345647.1	6000000	6113113	0.00574265956643586
OX345648.1	0	1000000	0.0056804807312231
OX345648.1	1000000	2000000	0.00585813454611671
OX345648.1	2000000	3000000	0.0066753420946273
OX345648.1	3000000	4000000	0.00520081543101036
OX345648.1	4000000	5000000	0.00604022970638266
OX345648.1	5000000	6000000	0.00704841510590388
OX345648.1	6000000	6033917	0.000821648893882935
OX345649.1	0	1000000	0.00639109599079753
OX345649.1	1000000	2000000	0.00623564890276563
OX345649.1	2000000	3000000	0.00642662675377625
OX345649.1	3000000	4000000	0.00600914028877628
OX345649.1	4000000	5000000	0.0057471009118082
OX345649.1	5000000	6000000	0.00615126334069116
OX345649.1	6000000	6019071	0.0000532961444680823
OX345650.1	0	1000000	0.00633335850095711
OX345650.1	1000000	2000000	0.00472115013079762
OX345650.1	2000000	3000000	0.00599137490728691
OX345650.1	3000000	4000000	0.00572045283957416
OX345650.1	4000000	5000000	0.00592475472670181
OX345650.1	5000000	5615395	0.00636000657319115
OX345651.1	0	1000000	0.00508089910595718
OX345651.1	1000000	2000000	0.00680414111042517
OX345651.1	2000000	3000000	0.00504092699760611
OX345651.1	3000000	4000000	0.00483662511047847
OX345651.1	4000000	5000000	0.00712391797723366
OX345651.1	5000000	5393497	0.00505425103372314
OX345652.1	0	1000000	0.00628894504723371
OX345652.1	1000000	2000000	0.00459235111499976
OX345652.1	2000000	3000000	0.0036463445506913
OX345652.1	3000000	4000000	0.0052052567763827
OX345652.1	4000000	5000000	0.00619567679441456
OX345652.1	5000000	5111720	0.00680858245579751
OX345653.1	0	1000000	0.00598249221654223
OX345653.1	1000000	2000000	0.0061779114129252
OX345653.1	2000000	3000000	0.00509866448744654
OX345653.1	3000000	4000000	0.00577374898404225
OX345653.1	4000000	4740285	0.00662204595015922

## Sheet: Petfic_F.regions.normalised
OX345636.1	0	1000000	0.002326664
OX345636.1	1000000	2000000	0.002565618
OX345636.1	2000000	3000000	0.004477255
OX345636.1	3000000	4000000	0.004162841
OX345636.1	4000000	5000000	0.00427603
OX345636.1	5000000	6000000	0.005533686
OX345636.1	6000000	7000000	0.00274169
OX345636.1	7000000	8000000	0.00157207
OX345636.1	8000000	9000000	0.003056104
OX345636.1	9000000	10000000	0.004791669
OX345636.1	10000000	11000000	0.005898407
OX345636.1	11000000	12000000	0.004502408
OX345636.1	12000000	13000000	0.004640751
OX345636.1	13000000	14000000	0.004137688
OX345636.1	14000000	15000000	0.003886157
OX345636.1	15000000	16000000	0.005961289
OX345636.1	16000000	17000000	0.004452102
OX345636.1	17000000	18000000	0.003559166
OX345636.1	18000000	19000000	0.005495957
OX345636.1	19000000	20000000	0.004804246
OX345636.1	20000000	21000000	0.005068354
OX345636.1	21000000	22000000	0.004565291
OX345636.1	22000000	23000000	0.004376643
OX345636.1	23000000	24000000	0.005382768
OX345636.1	24000000	25000000	0.004263454
OX345636.1	25000000	26000000	0.004288607
OX345636.1	26000000	27000000	0.004288607
OX345636.1	27000000	28000000	0.003571743
OX345636.1	28000000	29000000	0.006225397
OX345636.1	29000000	30000000	0.00511866
OX345636.1	30000000	31000000	0.004062229
OX345636.1	31000000	32000000	0.005030624
OX345636.1	32000000	33000000	0.003118987
OX345636.1	33000000	34000000	0.004930011
OX345636.1	34000000	35000000	0.005282155
OX345636.1	35000000	36000000	0.004074805
OX345636.1	36000000	37000000	0.005822947
OX345636.1	37000000	38000000	0.004741363
OX345636.1	38000000	39000000	0.005835524
OX345636.1	39000000	40000000	0.004615597
OX345636.1	40000000	41000000	0.004024499
OX345636.1	41000000	42000000	0.004225724
OX345636.1	42000000	43000000	0.003760391
OX345636.1	43000000	44000000	0.004263454
OX345636.1	44000000	45000000	0.004338913
OX345636.1	45000000	46000000	0.003496284
OX345636.1	46000000	47000000	0.003647202
OX345636.1	47000000	48000000	0.004565291
OX345636.1	48000000	49000000	0.003672355
OX345636.1	49000000	50000000	0.001157044
OX345636.1	50000000	51000000	0.003131563
OX345636.1	51000000	52000000	0.002754267
OX345636.1	52000000	53000000	0.005131236
OX345636.1	53000000	54000000	0.003722662
OX345636.1	54000000	55000000	0.003961616
OX345636.1	55000000	56000000	0.00467848
OX345636.1	56000000	57000000	0.002791996
OX345636.1	57000000	58000000	0.002766843
OX345636.1	58000000	59000000	0.002628501
OX345636.1	59000000	60000000	0.001785871
OX345636.1	60000000	61000000	0.002288934
OX345636.1	61000000	62000000	0.00237697
OX345636.1	62000000	63000000	0.003357941
OX345636.1	63000000	63279122	0.002490159
OX345637.1	0	1000000	0.004603021
OX345637.1	1000000	2000000	0.0058481
OX345637.1	2000000	3000000	0.003383095
OX345637.1	3000000	4000000	0.004024499
OX345637.1	4000000	5000000	0.00475394
OX345637.1	5000000	6000000	0.005194119
OX345637.1	6000000	7000000	0.004829399
OX345637.1	7000000	8000000	0.005999019
OX345637.1	8000000	9000000	0.005458227
OX345637.1	9000000	10000000	0.003986769
OX345637.1	10000000	11000000	0.004628174
OX345637.1	11000000	12000000	0.004414372
OX345637.1	12000000	13000000	0.00782262
OX345637.1	13000000	14000000	0.009382114
OX345637.1	14000000	15000000	0.004980318
OX345637.1	15000000	15999405	0.004565291
OX345638.1	0	1000000	0.006112208
OX345638.1	1000000	2000000	0.004829399
OX345638.1	2000000	3000000	0.00515639
OX345638.1	3000000	4000000	0.005357614
OX345638.1	4000000	5000000	0.004464679
OX345638.1	5000000	6000000	0.004917435
OX345638.1	6000000	7000000	0.001924214
OX345638.1	7000000	8000000	0.005948713
OX345638.1	8000000	9000000	0.005382768
OX345638.1	9000000	10000000	0.001710412
OX345638.1	10000000	11000000	0.002150592
OX345638.1	11000000	11427112	0.006376316
OX345639.1	0	1000000	0.006577541
OX345639.1	1000000	2000000	0.006363739
OX345639.1	2000000	3000000	0.005797794
OX345639.1	3000000	4000000	0.006866802
OX345639.1	4000000	5000000	0.007357287
OX345639.1	5000000	6000000	0.006175091
OX345639.1	6000000	7000000	0.006212821
OX345639.1	7000000	8000000	0.005093507
OX345639.1	8000000	9000000	0.00701772
OX345639.1	9000000	9942894	0.007281828
OX345640.1	0	1000000	0.005621722
OX345640.1	1000000	2000000	0.005143813
OX345640.1	2000000	3000000	0.005181543
OX345640.1	3000000	4000000	0.006439199
OX345640.1	4000000	5000000	0.004955165
OX345640.1	5000000	6000000	0.006665577
OX345640.1	6000000	7000000	0.004326337
OX345640.1	7000000	8000000	0.005357614
OX345640.1	8000000	8526170	0.004640751
OX345641.1	0	1000000	0.004892282
OX345641.1	1000000	2000000	0.00435149
OX345641.1	2000000	3000000	0.002980645
OX345641.1	3000000	4000000	0.004854552
OX345641.1	4000000	5000000	0.006363739
OX345641.1	5000000	6000000	0.002364393
OX345641.1	6000000	7000000	0.003269906
OX345641.1	7000000	8000000	0.005634299
OX345641.1	8000000	8186180	0.003772968
OX345642.1	0	1000000	0.005583993
OX345642.1	1000000	2000000	0.006099632
OX345642.1	2000000	3000000	0.006539811
OX345642.1	3000000	4000000	0.005005471
OX345642.1	4000000	5000000	0.004867129
OX345642.1	5000000	6000000	0.005357614
OX345642.1	6000000	7000000	0.005458227
OX345642.1	7000000	7587133	0.006300856
OX345643.1	0	1000000	0.005948713
OX345643.1	1000000	2000000	0.005030624
OX345643.1	2000000	3000000	0.005495957
OX345643.1	3000000	4000000	0.005106083
OX345643.1	4000000	5000000	0.006099632
OX345643.1	5000000	6000000	0.005382768
OX345643.1	6000000	7000000	0.006766189
OX345643.1	7000000	7091006	0.003244752
OX345644.1	0	1000000	0.006426622
OX345644.1	1000000	2000000	0.005583993
OX345644.1	2000000	3000000	0.005093507
OX345644.1	3000000	4000000	0.004816822
OX345644.1	4000000	5000000	0.00508093
OX345644.1	5000000	6000000	0.006149938
OX345644.1	6000000	7000000	0.006149938
OX345644.1	7000000	7016685	0.000918089
OX345645.1	0	1000000	0.005986442
OX345645.1	1000000	2000000	0.006426622
OX345645.1	2000000	3000000	0.004514985
OX345645.1	3000000	4000000	0.005206696
OX345645.1	4000000	5000000	0.014488197
OX345645.1	5000000	6000000	0.00427603
OX345645.1	6000000	6870705	0.005018047
OX345646.1	0	1000000	0.00625055
OX345646.1	1000000	2000000	0.005370191
OX345646.1	2000000	3000000	0.004364066
OX345646.1	3000000	4000000	0.002678807
OX345646.1	4000000	5000000	0.004401796
OX345646.1	5000000	6000000	0.00628828
OX345646.1	6000000	6121522	0.001408575
OX345647.1	0	1000000	0.006388892
OX345647.1	1000000	2000000	0.005307308
OX345647.1	2000000	3000000	0.003345365
OX345647.1	3000000	4000000	0.005621722
OX345647.1	4000000	5000000	0.005709758
OX345647.1	5000000	6000000	0.006829072
OX345647.1	6000000	6113113	0.005772641
OX345648.1	0	1000000	0.005407921
OX345648.1	1000000	2000000	0.005621722
OX345648.1	2000000	3000000	0.006439199
OX345648.1	3000000	4000000	0.005231849
OX345648.1	4000000	5000000	0.005634299
OX345648.1	5000000	6000000	0.00705545
OX345648.1	6000000	6033917	0.001295386
OX345649.1	0	1000000	0.006539811
OX345649.1	1000000	2000000	0.00669073
OX345649.1	2000000	3000000	0.006539811
OX345649.1	3000000	4000000	0.006011596
OX345649.1	4000000	5000000	0.005822947
OX345649.1	5000000	6000000	0.006162514
OX345649.1	6000000	6019071	0
OX345650.1	0	1000000	0.006577541
OX345650.1	1000000	2000000	0.004854552
OX345650.1	2000000	3000000	0.006175091
OX345650.1	3000000	4000000	0.005684605
OX345650.1	4000000	5000000	0.005910983
OX345650.1	5000000	5615395	0.006514658
OX345651.1	0	1000000	0.005168966
OX345651.1	1000000	2000000	0.00669073
OX345651.1	2000000	3000000	0.004942588
OX345651.1	3000000	4000000	0.0050432
OX345651.1	4000000	5000000	0.007218945
OX345651.1	5000000	5393497	0.004917435
OX345652.1	0	1000000	0.006300856
OX345652.1	1000000	2000000	0.004728786
OX345652.1	2000000	3000000	0.003735238
OX345652.1	3000000	4000000	0.005194119
OX345652.1	4000000	5000000	0.00628828
OX345652.1	5000000	5111720	0.006967414
OX345653.1	0	1000000	0.005936136
OX345653.1	1000000	2000000	0.006124785
OX345653.1	2000000	3000000	0.005294732
OX345653.1	3000000	4000000	0.006049325
OX345653.1	4000000	4740285	0.006778766

## Sheet: Phavent_M.regions.normalised
odPhaVent1.1_Chr1	0	1000000	0.00336869943015458
odPhaVent1.1_Chr1	1000000	2000000	0.00374964581431225
odPhaVent1.1_Chr1	2000000	3000000	0.00325850832729906
odPhaVent1.1_Chr1	3000000	4000000	0.00447690709315871
odPhaVent1.1_Chr1	4000000	5000000	0.00488618833233637
odPhaVent1.1_Chr1	5000000	6000000	0.00259736171016592
odPhaVent1.1_Chr1	6000000	7000000	0.00266977300632812
odPhaVent1.1_Chr1	7000000	8000000	0.0030444227560369
odPhaVent1.1_Chr1	8000000	9000000	0.00336555111293014
odPhaVent1.1_Chr1	9000000	10000000	0.00435727103862985
odPhaVent1.1_Chr1	10000000	11000000	0.00434782608695652
odPhaVent1.1_Chr1	11000000	12000000	0.00504360419355854
odPhaVent1.1_Chr1	12000000	13000000	0.00471932751944086
odPhaVent1.1_Chr1	13000000	14000000	0.00268236627522589
odPhaVent1.1_Chr1	14000000	15000000	0.00449894531372981
odPhaVent1.1_Chr1	15000000	16000000	0.00303497780436357
odPhaVent1.1_Chr1	16000000	17000000	0.00248717060731039
odPhaVent1.1_Chr1	17000000	17765667	0.00369297610427227
odPhaVent1.1_Chr1_unloc_1	0	190463	0.00287441362591695
odPhaVent1.1_Chr1_unloc_2	0	130566	0.00446116550703649
odPhaVent1.1_Chr1_unloc_3	0	98301	0.000176305764568838
odPhaVent1.1_Chr1_unloc_4	0	79031	0.000163712495671064
odPhaVent1.1_Chr1_unloc_5	0	77549	0.000957088436230835
odPhaVent1.1_Chr1_unloc_6	0	68438	0.00295312155652804
odPhaVent1.1_Chr1_unloc_7	0	65743	0.00204955451311274
odPhaVent1.1_Chr1_unloc_8	0	39794	0.00323332178950351
odPhaVent1.1_Chr2	0	1000000	0.00490192991845858
odPhaVent1.1_Chr2	1000000	2000000	0.00402669773006328
odPhaVent1.1_Chr2	2000000	3000000	0.00524509649592293
odPhaVent1.1_Chr2	3000000	4000000	0.00444227560368983
odPhaVent1.1_Chr2	4000000	5000000	0.00320183861725907
odPhaVent1.1_Chr2	5000000	6000000	0.00342222082297012
odPhaVent1.1_Chr2	6000000	7000000	0.00338129269905236
odPhaVent1.1_Chr2	7000000	8000000	0.00240216604225042
odPhaVent1.1_Chr2	8000000	9000000	0.00298775304599691
odPhaVent1.1_Chr2	9000000	9138298	0.00476655227780751
odPhaVent1.1_Chr2_unloc_1	0	271024	0.00123728866920631
odPhaVent1.1_Chr2_unloc_2	0	73022	0.000402984604728772
odPhaVent1.1_Chr2_unloc_3	0	37459	0.00358593331864119
odPhaVent1.1_Chr3	0	1000000	0.00323332178950351
odPhaVent1.1_Chr3	1000000	2000000	0.0041872619085099
odPhaVent1.1_Chr3	2000000	3000000	0.00432893618360986
odPhaVent1.1_Chr3	3000000	4000000	0.00378112898655669
odPhaVent1.1_Chr3	4000000	5000000	0.00601643421591159
odPhaVent1.1_Chr3	5000000	6000000	0.0047224758366653
odPhaVent1.1_Chr3	6000000	7000000	0.00400151119226773
odPhaVent1.1_Chr3	7000000	8000000	0.00415892705348991
odPhaVent1.1_Chr3	8000000	9000000	0.00387557850328999
odPhaVent1.1_Chr3	9000000	9380658	0.00368667946982338
odPhaVent1.1_Chr4	0	1000000	0.00364575134590561
odPhaVent1.1_Chr4	1000000	2000000	0.00384094701382111
odPhaVent1.1_Chr4	2000000	3000000	0.00408021912287882
odPhaVent1.1_Chr4	3000000	4000000	0.00468154771274754
odPhaVent1.1_Chr4	4000000	5000000	0.00362056480811007
odPhaVent1.1_Chr4	5000000	6000000	0.00310424078330133
odPhaVent1.1_Chr4	6000000	7000000	0.00482637030507194
odPhaVent1.1_Chr4	7000000	7746905	0.00405818090230772
odPhaVent1.1_Chr4_unloc_1	0	169351	0.00063281176211315
odPhaVent1.1_Chr4_unloc_2	0	77435	0.00548436860498064
odPhaVent1.1_Chr4_unloc_3	0	50800	0.000270755281302144
odPhaVent1.1_Chr4_unloc_4	0	48157	0.00466265780940088
odPhaVent1.1_Chr5	0	1000000	0.00442023738311872
odPhaVent1.1_Chr5	1000000	2000000	0.00358593331864119
odPhaVent1.1_Chr5	2000000	3000000	0.00415577873626547
odPhaVent1.1_Chr5	3000000	4000000	0.00367408620092561
odPhaVent1.1_Chr5	4000000	5000000	0.00350092875358121
odPhaVent1.1_Chr5	5000000	6000000	0.00356704341529453
odPhaVent1.1_Chr5	6000000	7000000	0.00433838113528319
odPhaVent1.1_Chr5	7000000	7712199	0.00400465950949218
odPhaVent1.1_Chr5_unloc_1	0	81664	0.00178824418348393
odPhaVent1.1_Chr5_unloc_2	0	55718	0.00057929036929761
odPhaVent1.1_Chr5_unloc_3	0	55044	0.00485155684286749
odPhaVent1.1_Chr5_unloc_4	0	47818	0.000635960079337594
odPhaVent1.1_Chr5_unloc_5	0	41956	0.0023864244561282
odPhaVent1.1_Chr5_unloc_6	0	16753	0.00308849919717911
odPhaVent1.1_Chr6	0	1000000	0.00426596983912099
odPhaVent1.1_Chr6	1000000	2000000	0.00441079243144539
odPhaVent1.1_Chr6	2000000	3000000	0.00230456820829267
odPhaVent1.1_Chr6	3000000	4000000	0.00617070175990933
odPhaVent1.1_Chr6	4000000	5000000	0.00471617920221642
odPhaVent1.1_Chr6	5000000	6000000	0.00443912728646538
odPhaVent1.1_Chr6	6000000	7000000	0.00478229386392973
odPhaVent1.1_Chr6	7000000	7959531	0.00477599722948084
odPhaVent1.1_Chr7	0	1000000	0.00476970059503196
odPhaVent1.1_Chr7	1000000	2000000	0.00426282152189655
odPhaVent1.1_Chr7	2000000	3000000	0.0050624940969052
odPhaVent1.1_Chr7	3000000	4000000	0.00454302175487202
odPhaVent1.1_Chr7	4000000	5000000	0.00528602461984069
odPhaVent1.1_Chr7	5000000	6000000	0.00482951862229638
odPhaVent1.1_Chr7	6000000	7000000	0.00500267606964078
odPhaVent1.1_Chr7	7000000	7828988	0.00500897270408966
odPhaVent1.1_Chr8	0	1000000	0.00538362245379845
odPhaVent1.1_Chr8	1000000	2000000	0.00498378616629412
odPhaVent1.1_Chr8	2000000	3000000	0.00378112898655669
odPhaVent1.1_Chr8	3000000	4000000	0.00402984604728773
odPhaVent1.1_Chr8	4000000	5000000	0.00493341309070302
odPhaVent1.1_Chr8	5000000	6000000	0.00394169316500331
odPhaVent1.1_Chr8	6000000	7000000	0.00420930012908101
odPhaVent1.1_Chr8	7000000	7566979	0.00421244844630545
odPhaVent1.1_Chr9	0	1000000	0.00404558763340994
odPhaVent1.1_Chr9	1000000	2000000	0.00437616094197651
odPhaVent1.1_Chr9	2000000	3000000	0.00473821742278752
odPhaVent1.1_Chr9	3000000	4000000	0.0036300097597834
odPhaVent1.1_Chr9	4000000	5000000	0.00353870856027453
odPhaVent1.1_Chr9	5000000	6000000	0.00474451405723641
odPhaVent1.1_Chr9	6000000	7000000	0.00443912728646538
odPhaVent1.1_Chr9	7000000	7148111	0.00487989169788748
odPhaVent1.1_Chr9_unloc_1	0	59731	0.000708371375499795
odPhaVent1.1_Chr9_unloc_2	0	43146	0.00161823505336398
odPhaVent1.1_Chr9_unloc_3	0	35812	0.00364260302868117
odPhaVent1.1_Chr10	0	1000000	0.00521676164090294
odPhaVent1.1_Chr10	1000000	2000000	0.00465321285772754
odPhaVent1.1_Chr10	2000000	3000000	0.00421559676352989
odPhaVent1.1_Chr10	3000000	4000000	0.00498378616629412
odPhaVent1.1_Chr10	4000000	5000000	0.00374020086263892
odPhaVent1.1_Chr10	5000000	6000000	0.00194880836193055
odPhaVent1.1_Chr10	6000000	7000000	0.00488933664956081
odPhaVent1.1_Chr10	7000000	7068862	0.00255013695179926
odPhaVent1.1_Chr10_unloc_1	0	70772	0.00108616944243302
odPhaVent1.1_Chr11	0	1000000	0.00361741649088562
odPhaVent1.1_Chr11	1000000	2000000	0.00298775304599691
odPhaVent1.1_Chr11	2000000	3000000	0.00498378616629412
odPhaVent1.1_Chr11	3000000	4000000	0.00475710732613418
odPhaVent1.1_Chr11	4000000	5000000	0.00356389509807008
odPhaVent1.1_Chr11	5000000	6000000	0.00461543305103422
odPhaVent1.1_Chr11	6000000	7000000	0.00439505084532317
odPhaVent1.1_Chr11	7000000	7120715	0.0041872619085099
odPhaVent1.1_Chr12	0	1000000	0.00428485974246765
odPhaVent1.1_Chr12	1000000	2000000	0.00373075591096559
odPhaVent1.1_Chr12	2000000	3000000	0.00471303088499197
odPhaVent1.1_Chr12	3000000	4000000	0.00502156597298744
odPhaVent1.1_Chr12	4000000	5000000	0.00501212102131411
odPhaVent1.1_Chr12	5000000	6000000	0.00425652488744766
odPhaVent1.1_Chr12	6000000	6760026	0.00363945471145673
odPhaVent1.1_Chr12_unloc_1	0	157674	0.00468469602997198
odPhaVent1.1_Chr12_unloc_2	0	62625	0.00364889966313006
odPhaVent1.1_Chr13	0	1000000	0.00518213015143406
odPhaVent1.1_Chr13	1000000	2000000	0.0043320845008343
odPhaVent1.1_Chr13	2000000	3000000	0.0047004376160942
odPhaVent1.1_Chr13	3000000	4000000	0.00457135660989201
odPhaVent1.1_Chr13	4000000	5000000	0.00470988256776753
odPhaVent1.1_Chr13	5000000	6000000	0.00491452318735636
odPhaVent1.1_Chr13	6000000	6950038	0.00468154771274754
odPhaVent1.1_Chr14	0	1000000	0.00394169316500331
odPhaVent1.1_Chr14	1000000	2000000	0.00341592418852123
odPhaVent1.1_Chr14	2000000	3000000	0.00483896357396971
odPhaVent1.1_Chr14	3000000	4000000	0.00457135660989201
odPhaVent1.1_Chr14	4000000	5000000	0.00385668859994333
odPhaVent1.1_Chr14	5000000	6000000	0.0049176715045808
odPhaVent1.1_Chr14	6000000	6518446	0.00522305827535182
odPhaVent1.1_Chr14_unloc_1	0	180493	0.00137896294430627
odPhaVent1.1_Chr14_unloc_2	0	81068	0.00186695211409502
odPhaVent1.1_Chr14_unloc_3	0	66180	0.0019739948997261
odPhaVent1.1_Chr14_unloc_4	0	54461	0.00302238453546579
odPhaVent1.1_Chr14_unloc_5	0	48936	0.000352611529137676
odPhaVent1.1_Chr15	0	1000000	0.00500582438686522
odPhaVent1.1_Chr15	1000000	2000000	0.0049176715045808
odPhaVent1.1_Chr15	2000000	3000000	0.00524194817869848
odPhaVent1.1_Chr15	3000000	4000000	0.0038692818688411
odPhaVent1.1_Chr15	4000000	5000000	0.00441079243144539
odPhaVent1.1_Chr15	5000000	6000000	0.00514435034474074
odPhaVent1.1_Chr15	6000000	6937180	0.00539306740547177
odPhaVent1.1_Chr16	0	1000000	0.00455561502376979
odPhaVent1.1_Chr16	1000000	2000000	0.00501841765576299
odPhaVent1.1_Chr16	2000000	3000000	0.00525454144759626
odPhaVent1.1_Chr16	3000000	4000000	0.0048452602084186
odPhaVent1.1_Chr16	4000000	5000000	0.00348833548468344
odPhaVent1.1_Chr16	5000000	6000000	0.00478544218115417
odPhaVent1.1_Chr16	6000000	6918591	0.00501212102131411
odPhaVent1.1_Chr17	0	1000000	0.00413374051569436
odPhaVent1.1_Chr17	1000000	2000000	0.00420930012908101
odPhaVent1.1_Chr17	2000000	3000000	0.00474136574001196
odPhaVent1.1_Chr17	3000000	4000000	0.00436356767307874
odPhaVent1.1_Chr17	4000000	5000000	0.0044548688725876
odPhaVent1.1_Chr17	5000000	6000000	0.00371816264206781
odPhaVent1.1_Chr17	6000000	6570977	0.00371501432484337
odPhaVent1.1_Chr17_unloc_1	0	90113	0.00349148380190788
odPhaVent1.1_Chr17_unloc_2	0	88419	0.00230141989106822
odPhaVent1.1_Chr17_unloc_3	0	49421	0.000635960079337594
odPhaVent1.1_Chr18	0	1000000	0.00470673425054308
odPhaVent1.1_Chr18	1000000	2000000	0.00443597896924094
odPhaVent1.1_Chr18	2000000	3000000	0.00446116550703649
odPhaVent1.1_Chr18	3000000	4000000	0.00358908163586563
odPhaVent1.1_Chr18	4000000	5000000	0.00465636117495199
odPhaVent1.1_Chr18	5000000	6000000	0.00469414098164531
odPhaVent1.1_Chr18	6000000	6632576	0.00459339483046312
odPhaVent1.1_Chr19	0	1000000	0.00475395900890974
odPhaVent1.1_Chr19	1000000	2000000	0.00493970972515191
odPhaVent1.1_Chr19	2000000	3000000	0.00370556937317004
odPhaVent1.1_Chr19	3000000	4000000	0.00417466863961213
odPhaVent1.1_Chr19	4000000	5000000	0.00430689796303876
odPhaVent1.1_Chr19	5000000	6000000	0.00494600635960079
odPhaVent1.1_Chr19	6000000	6109635	0.0048452602084186
odPhaVent1.1_Chr19_unloc_1	0	115615	0.000982274974026383
odPhaVent1.1_Chr20	0	1000000	0.00503415924188521
odPhaVent1.1_Chr20	1000000	2000000	0.00524509649592293
odPhaVent1.1_Chr20	2000000	3000000	0.00422819003242767
odPhaVent1.1_Chr20	3000000	4000000	0.00456191165821868
odPhaVent1.1_Chr20	4000000	5000000	0.00421874508075434
odPhaVent1.1_Chr20	5000000	5977719	0.00464691622327866
odPhaVent1.1_Chr21	0	1000000	0.00472877247111419
odPhaVent1.1_Chr21	1000000	2000000	0.00503101092466077
odPhaVent1.1_Chr21	2000000	3000000	0.00465950949217643
odPhaVent1.1_Chr21	3000000	4000000	0.00542140226049177
odPhaVent1.1_Chr21	4000000	5000000	0.00466265780940088
odPhaVent1.1_Chr21	5000000	5913535	0.00511601548972074
odPhaVent1.1_Chr22	0	1000000	0.0051128671724963
odPhaVent1.1_Chr22	1000000	2000000	0.00449264867928092
odPhaVent1.1_Chr22	2000000	3000000	0.00512860875861852
odPhaVent1.1_Chr22	3000000	4000000	0.00516953688253628
odPhaVent1.1_Chr22	4000000	5000000	0.00532065610930957
odPhaVent1.1_Chr22	5000000	5629729	0.00476025564335862
odPhaVent1.1_Chr22_unloc_1	0	92980	0.000305386770771023
odPhaVent1.1_Chr23	0	1000000	0.00346314894688789
odPhaVent1.1_Chr23	1000000	2000000	0.00475395900890974
odPhaVent1.1_Chr23	2000000	3000000	0.0051349053930674
odPhaVent1.1_Chr23	3000000	4000000	0.00465636117495199
odPhaVent1.1_Chr23	4000000	5000000	0.00490507823568303
odPhaVent1.1_Chr23	5000000	5659230	0.00505619746245632
odPhaVent1.1_Chr24	0	1000000	0.00462172968548311
odPhaVent1.1_Chr24	1000000	2000000	0.00659887290243365
odPhaVent1.1_Chr24	2000000	3000000	0.00315776217611687
odPhaVent1.1_Chr24	3000000	4000000	0.00426282152189655
odPhaVent1.1_Chr24	4000000	5000000	0.0049176715045808
odPhaVent1.1_Chr24	5000000	5337433	0.00479173881560306
odPhaVent1.1_Chr24_unloc_1	0	84089	0.00583383181689387
odPhaVent1.1_Chr25	0	1000000	0.00470673425054308
odPhaVent1.1_Chr25	1000000	2000000	0.00466580612662532
odPhaVent1.1_Chr25	2000000	3000000	0.00463432295438088
odPhaVent1.1_Chr25	3000000	4000000	0.00459339483046312
odPhaVent1.1_Chr25	4000000	5000000	0.00382520542769889
odPhaVent1.1_Chr25	5000000	5391640	0.00405818090230772
odPhaVent1.1_scaffold_93	0	1000	0.0048232219878475
odPhaVent1.1_scaffold_34	0	257904	0.00640997386896704
odPhaVent1.1_scaffold_71	0	59359	0.000270755281302144
odPhaVent1.1_scaffold_77	0	50000	0.000129081006202185
odPhaVent1.1_scaffold_46	0	95676	0.000343166577464345
odPhaVent1.1_scaffold_90	0	31613	0.000431319459748764
odPhaVent1.1_scaffold_87	0	39157	0.0022416018638038
odPhaVent1.1_scaffold_83	0	46277	0.00230141989106822
odPhaVent1.1_scaffold_59	0	76716	0.0269716336618078
odPhaVent1.1_scaffold_72	0	59000	0.000157415861222177
odPhaVent1.1_scaffold_49	0	90376	0.0021408557126216
odPhaVent1.1_scaffold_61	0	72094	0.00220067373988603
odPhaVent1.1_scaffold_82	0	47743	0.00146396750936624
odPhaVent1.1_scaffold_35	0	224404	0.00651701665459812
odPhaVent1.1_scaffold_40	0	160000	0.00605421402260492
odPhaVent1.1_scaffold_39	0	164000	0.00452098353430092
odPhaVent1.1_scaffold_54	0	81621	0.000100746151182193
odPhaVent1.1_scaffold_92	0	16393	0.00300349463211913
odPhaVent1.1_scaffold_68	0	62845	0.000865787236721972
odPhaVent1.1_scaffold_63	0	69930	0.00113654251802412

## Sheet: Phavent_F.regions.normalised
odPhaVent1.1_Chr1	0	1000000	0.003381982
odPhaVent1.1_Chr1	1000000	2000000	0.003964021
odPhaVent1.1_Chr1	2000000	3000000	0.002764046
odPhaVent1.1_Chr1	3000000	4000000	0.004897335
odPhaVent1.1_Chr1	4000000	5000000	0.004648623
odPhaVent1.1_Chr1	5000000	6000000	0.002594819
odPhaVent1.1_Chr1	6000000	7000000	0.0026461
odPhaVent1.1_Chr1	7000000	8000000	0.003153781
odPhaVent1.1_Chr1	8000000	9000000	0.003881972
odPhaVent1.1_Chr1	9000000	10000000	0.004248631
odPhaVent1.1_Chr1	10000000	11000000	0.004571701
odPhaVent1.1_Chr1	11000000	12000000	0.004674263
odPhaVent1.1_Chr1	12000000	13000000	0.004617854
odPhaVent1.1_Chr1	13000000	14000000	0.002669176
odPhaVent1.1_Chr1	14000000	15000000	0.004561445
odPhaVent1.1_Chr1	15000000	16000000	0.002992246
odPhaVent1.1_Chr1	16000000	17000000	0.002466616
odPhaVent1.1_Chr1	17000000	17765667	0.003605054
odPhaVent1.1_Chr1_unloc_1	0	190463	0.00265892
odPhaVent1.1_Chr1_unloc_2	0	130566	0.004258887
odPhaVent1.1_Chr1_unloc_3	0	98301	0.000289738
odPhaVent1.1_Chr1_unloc_4	0	79031	0.001884577
odPhaVent1.1_Chr1_unloc_5	0	77549	0.001892269
odPhaVent1.1_Chr1_unloc_6	0	68438	0.002817891
odPhaVent1.1_Chr1_unloc_7	0	65743	0.00071537
odPhaVent1.1_Chr1_unloc_8	0	39794	0.002212775
odPhaVent1.1_Chr2	0	1000000	0.004879387
odPhaVent1.1_Chr2	1000000	2000000	0.004040943
odPhaVent1.1_Chr2	2000000	3000000	0.005310147
odPhaVent1.1_Chr2	3000000	4000000	0.004648623
odPhaVent1.1_Chr2	4000000	5000000	0.003384546
odPhaVent1.1_Chr2	5000000	6000000	0.003584542
odPhaVent1.1_Chr2	6000000	7000000	0.003394802
odPhaVent1.1_Chr2	7000000	8000000	0.002120469
odPhaVent1.1_Chr2	8000000	9000000	0.003143525
odPhaVent1.1_Chr2	9000000	9138298	0.005410145
odPhaVent1.1_Chr2_unloc_1	0	271024	0.001017928
odPhaVent1.1_Chr2_unloc_2	0	73022	0.001894833
odPhaVent1.1_Chr2_unloc_3	0	37459	0.000333326
odPhaVent1.1_Chr3	0	1000000	0.002423027
odPhaVent1.1_Chr3	1000000	2000000	0.003474288
odPhaVent1.1_Chr3	2000000	3000000	0.003935817
odPhaVent1.1_Chr3	3000000	4000000	0.003515313
odPhaVent1.1_Chr3	4000000	5000000	0.004164017
odPhaVent1.1_Chr3	5000000	6000000	0.004364013
odPhaVent1.1_Chr3	6000000	7000000	0.003969149
odPhaVent1.1_Chr3	7000000	8000000	0.004133249
odPhaVent1.1_Chr3	8000000	9000000	0.00430504
odPhaVent1.1_Chr3	9000000	9380658	0.004894771
odPhaVent1.1_Chr4	0	1000000	0.003984534
odPhaVent1.1_Chr4	1000000	2000000	0.004015302
odPhaVent1.1_Chr4	2000000	3000000	0.004264015
odPhaVent1.1_Chr4	3000000	4000000	0.004492216
odPhaVent1.1_Chr4	4000000	5000000	0.003523005
odPhaVent1.1_Chr4	5000000	6000000	0.003205062
odPhaVent1.1_Chr4	6000000	7000000	0.004725544
odPhaVent1.1_Chr4	7000000	7746905	0.004099916
odPhaVent1.1_Chr4_unloc_1	0	169351	0.001879449
odPhaVent1.1_Chr4_unloc_2	0	77435	0.006102439
odPhaVent1.1_Chr4_unloc_3	0	50800	0.001069209
odPhaVent1.1_Chr4_unloc_4	0	48157	0.006269102
odPhaVent1.1_Chr5	0	1000000	0.005056307
odPhaVent1.1_Chr5	1000000	2000000	0.004081968
odPhaVent1.1_Chr5	2000000	3000000	0.004240939
odPhaVent1.1_Chr5	3000000	4000000	0.004033251
odPhaVent1.1_Chr5	4000000	5000000	0.004546061
odPhaVent1.1_Chr5	5000000	6000000	0.003520441
odPhaVent1.1_Chr5	6000000	7000000	0.004199914
odPhaVent1.1_Chr5	7000000	7712199	0.004587085
odPhaVent1.1_Chr5_unloc_1	0	81664	0.002543538
odPhaVent1.1_Chr5_unloc_2	0	55718	0.000379479
odPhaVent1.1_Chr5_unloc_3	0	55044	0.001630736
odPhaVent1.1_Chr5_unloc_4	0	47818	0.000146151
odPhaVent1.1_Chr5_unloc_5	0	41956	0.002653792
odPhaVent1.1_Chr5_unloc_6	0	16753	0.003058912
odPhaVent1.1_Chr6	0	1000000	0.004761441
odPhaVent1.1_Chr6	1000000	2000000	0.004287092
odPhaVent1.1_Chr6	2000000	3000000	0.004328116
odPhaVent1.1_Chr6	3000000	4000000	0.005489631
odPhaVent1.1_Chr6	4000000	5000000	0.004730672
odPhaVent1.1_Chr6	5000000	6000000	0.004676827
odPhaVent1.1_Chr6	6000000	7000000	0.00534348
odPhaVent1.1_Chr6	7000000	7959531	0.005379377
odPhaVent1.1_Chr7	0	1000000	0.005433222
odPhaVent1.1_Chr7	1000000	2000000	0.003756333
odPhaVent1.1_Chr7	2000000	3000000	0.005522964
odPhaVent1.1_Chr7	3000000	4000000	0.004284527
odPhaVent1.1_Chr7	4000000	5000000	0.005412709
odPhaVent1.1_Chr7	5000000	6000000	0.004769133
odPhaVent1.1_Chr7	6000000	7000000	0.00543835
odPhaVent1.1_Chr7	7000000	7828988	0.005266559
odPhaVent1.1_Chr8	0	1000000	0.006217821
odPhaVent1.1_Chr8	1000000	2000000	0.005276815
odPhaVent1.1_Chr8	2000000	3000000	0.004043507
odPhaVent1.1_Chr8	3000000	4000000	0.00429222
odPhaVent1.1_Chr8	4000000	5000000	0.004915284
odPhaVent1.1_Chr8	5000000	6000000	0.004302476
odPhaVent1.1_Chr8	6000000	7000000	0.004353757
odPhaVent1.1_Chr8	7000000	7566979	0.004461447
odPhaVent1.1_Chr9	0	1000000	0.00453324
odPhaVent1.1_Chr9	1000000	2000000	0.004674263
odPhaVent1.1_Chr9	2000000	3000000	0.004689647
odPhaVent1.1_Chr9	3000000	4000000	0.003633259
odPhaVent1.1_Chr9	4000000	5000000	0.004471703
odPhaVent1.1_Chr9	5000000	6000000	0.004625546
odPhaVent1.1_Chr9	6000000	7000000	0.004905028
odPhaVent1.1_Chr9	7000000	7148111	0.006194745
odPhaVent1.1_Chr9_unloc_1	0	59731	0.001856372
odPhaVent1.1_Chr9_unloc_2	0	43146	0.001556378
odPhaVent1.1_Chr9_unloc_3	0	35812	0.00336147
odPhaVent1.1_Chr10	0	1000000	0.006040902
odPhaVent1.1_Chr10	1000000	2000000	0.004881951
odPhaVent1.1_Chr10	2000000	3000000	0.004692211
odPhaVent1.1_Chr10	3000000	4000000	0.00495118
odPhaVent1.1_Chr10	4000000	5000000	0.004166581
odPhaVent1.1_Chr10	5000000	6000000	0.001902525
odPhaVent1.1_Chr10	6000000	7000000	0.005369121
odPhaVent1.1_Chr10	7000000	7068862	0.002315337
odPhaVent1.1_Chr10_unloc_1	0	70772	0.001184591
odPhaVent1.1_Chr11	0	1000000	0.00419735
odPhaVent1.1_Chr11	1000000	2000000	0.00288712
odPhaVent1.1_Chr11	2000000	3000000	0.004825542
odPhaVent1.1_Chr11	3000000	4000000	0.004740928
odPhaVent1.1_Chr11	4000000	5000000	0.00430504
odPhaVent1.1_Chr11	5000000	6000000	0.005102459
odPhaVent1.1_Chr11	6000000	7000000	0.004876823
odPhaVent1.1_Chr11	7000000	7120715	0.004889643
odPhaVent1.1_Chr12	0	1000000	0.004730672
odPhaVent1.1_Chr12	1000000	2000000	0.003974277
odPhaVent1.1_Chr12	2000000	3000000	0.003866587
odPhaVent1.1_Chr12	3000000	4000000	0.00453324
odPhaVent1.1_Chr12	4000000	5000000	0.004394782
odPhaVent1.1_Chr12	5000000	6000000	0.004348629
odPhaVent1.1_Chr12	6000000	6760026	0.004264015
odPhaVent1.1_Chr12_unloc_1	0	157674	0.001840988
odPhaVent1.1_Chr12_unloc_2	0	62625	0.004269143
odPhaVent1.1_Chr13	0	1000000	0.00585629
odPhaVent1.1_Chr13	1000000	2000000	0.004981949
odPhaVent1.1_Chr13	2000000	3000000	0.004661443
odPhaVent1.1_Chr13	3000000	4000000	0.004553753
odPhaVent1.1_Chr13	4000000	5000000	0.00441273
odPhaVent1.1_Chr13	5000000	6000000	0.005661422
odPhaVent1.1_Chr13	6000000	6950038	0.005540912
odPhaVent1.1_Chr14	0	1000000	0.004151197
odPhaVent1.1_Chr14	1000000	2000000	0.003315317
odPhaVent1.1_Chr14	2000000	3000000	0.003579414
odPhaVent1.1_Chr14	3000000	4000000	0.004335808
odPhaVent1.1_Chr14	4000000	5000000	0.00368454
odPhaVent1.1_Chr14	5000000	6000000	0.005174253
odPhaVent1.1_Chr14	6000000	6518446	0.005851162
odPhaVent1.1_Chr14_unloc_1	0	180493	0.000838444
odPhaVent1.1_Chr14_unloc_2	0	81068	0.001451252
odPhaVent1.1_Chr14_unloc_3	0	66180	0.002802507
odPhaVent1.1_Chr14_unloc_4	0	54461	0.000528194
odPhaVent1.1_Chr14_unloc_5	0	48936	0.001858936
odPhaVent1.1_Chr15	0	1000000	0.005956288
odPhaVent1.1_Chr15	1000000	2000000	0.005553732
odPhaVent1.1_Chr15	2000000	3000000	0.005481939
odPhaVent1.1_Chr15	3000000	4000000	0.003802486
odPhaVent1.1_Chr15	4000000	5000000	0.004584521
odPhaVent1.1_Chr15	5000000	6000000	0.005851162
odPhaVent1.1_Chr15	6000000	6937180	0.006222949
odPhaVent1.1_Chr16	0	1000000	0.005335788
odPhaVent1.1_Chr16	1000000	2000000	0.005430658
odPhaVent1.1_Chr16	2000000	3000000	0.005440914
odPhaVent1.1_Chr16	3000000	4000000	0.004812722
odPhaVent1.1_Chr16	4000000	5000000	0.003810178
odPhaVent1.1_Chr16	5000000	6000000	0.00522297
odPhaVent1.1_Chr16	6000000	6918591	0.005802445
odPhaVent1.1_Chr17	0	1000000	0.004194786
odPhaVent1.1_Chr17	1000000	2000000	0.00429222
odPhaVent1.1_Chr17	2000000	3000000	0.004751185
odPhaVent1.1_Chr17	3000000	4000000	0.003935817
odPhaVent1.1_Chr17	4000000	5000000	0.004389654
odPhaVent1.1_Chr17	5000000	6000000	0.004028123
odPhaVent1.1_Chr17	6000000	6570977	0.004489651
odPhaVent1.1_Chr17_unloc_1	0	90113	0.002282004
odPhaVent1.1_Chr17_unloc_2	0	88419	0.001887141
odPhaVent1.1_Chr17_unloc_3	0	49421	0.001876885
odPhaVent1.1_Chr18	0	1000000	0.00515374
odPhaVent1.1_Chr18	1000000	2000000	0.004764005
odPhaVent1.1_Chr18	2000000	3000000	0.004689647
odPhaVent1.1_Chr18	3000000	4000000	0.003256343
odPhaVent1.1_Chr18	4000000	5000000	0.004112736
odPhaVent1.1_Chr18	5000000	6000000	0.004684519
odPhaVent1.1_Chr18	6000000	6632576	0.00491272
odPhaVent1.1_Chr19	0	1000000	0.005492195
odPhaVent1.1_Chr19	1000000	2000000	0.004922976
odPhaVent1.1_Chr19	2000000	3000000	0.003215319
odPhaVent1.1_Chr19	3000000	4000000	0.004199914
odPhaVent1.1_Chr19	4000000	5000000	0.004610162
odPhaVent1.1_Chr19	5000000	6000000	0.005325532
odPhaVent1.1_Chr19	6000000	6109635	0.0053563
odPhaVent1.1_Chr19_unloc_1	0	115615	0.00051281
odPhaVent1.1_Chr20	0	1000000	0.005794753
odPhaVent1.1_Chr20	1000000	2000000	0.005892187
odPhaVent1.1_Chr20	2000000	3000000	0.004487087
odPhaVent1.1_Chr20	3000000	4000000	0.004774261
odPhaVent1.1_Chr20	4000000	5000000	0.00452042
odPhaVent1.1_Chr20	5000000	5977719	0.004928104
odPhaVent1.1_Chr21	0	1000000	0.00554604
odPhaVent1.1_Chr21	1000000	2000000	0.005415274
odPhaVent1.1_Chr21	2000000	3000000	0.004684519
odPhaVent1.1_Chr21	3000000	4000000	0.005610141
odPhaVent1.1_Chr21	4000000	5000000	0.005058871
odPhaVent1.1_Chr21	5000000	5913535	0.006030646
odPhaVent1.1_Chr22	0	1000000	0.005494759
odPhaVent1.1_Chr22	1000000	2000000	0.004530676
odPhaVent1.1_Chr22	2000000	3000000	0.005215278
odPhaVent1.1_Chr22	3000000	4000000	0.005471683
odPhaVent1.1_Chr22	4000000	5000000	0.006146028
odPhaVent1.1_Chr22	5000000	5629729	0.00564091
odPhaVent1.1_Chr22_unloc_1	0	92980	0.003861459
odPhaVent1.1_Chr23	0	1000000	0.004169145
odPhaVent1.1_Chr23	1000000	2000000	0.004351193
odPhaVent1.1_Chr23	2000000	3000000	0.005489631
odPhaVent1.1_Chr23	3000000	4000000	0.004915284
odPhaVent1.1_Chr23	4000000	5000000	0.005410145
odPhaVent1.1_Chr23	5000000	5659230	0.006053722
odPhaVent1.1_Chr24	0	1000000	0.005420402
odPhaVent1.1_Chr24	1000000	2000000	0.006156284
odPhaVent1.1_Chr24	2000000	3000000	0.003653771
odPhaVent1.1_Chr24	3000000	4000000	0.004584521
odPhaVent1.1_Chr24	4000000	5000000	0.005476811
odPhaVent1.1_Chr24	5000000	5337433	0.00626141
odPhaVent1.1_Chr24_unloc_1	0	84089	0.003346085
odPhaVent1.1_Chr25	0	1000000	0.005056307
odPhaVent1.1_Chr25	1000000	2000000	0.004656315
odPhaVent1.1_Chr25	2000000	3000000	0.004756313
odPhaVent1.1_Chr25	3000000	4000000	0.004728108
odPhaVent1.1_Chr25	4000000	5000000	0.003979406
odPhaVent1.1_Chr25	5000000	5391640	0.00433068
odPhaVent1.1_scaffold_93	0	1000	0.003364034
odPhaVent1.1_scaffold_34	0	257904	0.003915304
odPhaVent1.1_scaffold_71	0	59359	0.000225636
odPhaVent1.1_scaffold_77	0	50000	0.000192304
odPhaVent1.1_scaffold_46	0	95676	0.000464093
odPhaVent1.1_scaffold_90	0	31613	0.00041794
odPhaVent1.1_scaffold_87	0	39157	0.000274353
odPhaVent1.1_scaffold_83	0	46277	0.000264097
odPhaVent1.1_scaffold_59	0	76716	0.0057486
odPhaVent1.1_scaffold_72	0	59000	0.001851244
odPhaVent1.1_scaffold_49	0	90376	0.513
odPhaVent1.1_scaffold_61	0	72094	0.001384587
odPhaVent1.1_scaffold_82	0	47743	1.28
odPhaVent1.1_scaffold_35	0	224404	0.003746077
odPhaVent1.1_scaffold_40	0	160000	0.003512748
odPhaVent1.1_scaffold_39	0	164000	0.002858916
odPhaVent1.1_scaffold_54	0	81621	9.74
odPhaVent1.1_scaffold_92	0	16393	0.0045076
odPhaVent1.1_scaffold_68	0	62845	0.000384607
odPhaVent1.1_scaffold_63	0	69930	0.000425632
