# Supplementary material for: Sponge genomes reveal a pre-metazoan origin of the sex determination toolkit and sex chromosomes
Source: Research Square preprint supplement (doi:10.21203/rs.3.rs-8554461/v1), 2026-02-12
Supplement: Supplementary file 3 [file 1b7a2eb4d4fea89a0224ea6d.xlsx]

## Sheet: Chondrosia_reniformis
# Population M	Ch11_21_M,Ch21_21_M,Ch31_21_M,Ch32_21_M,Ch5_20_M,Ch6_20_M,Ch9_20_M
# Population F	Ch12_21_F,Ch13_20_F,Ch14_21_F,Ch16_21_F,Ch1_20_F,Ch28_21_F,Ch2_20_F,Ch30_21_F,Ch34_21_F,Ch3_21_F,Ch4_20_F,Ch7_20_F,Ch8_20_F
# Group defaultgrp	M,F
# Locus ID	Chr	BP	phi_st	Smoothed Phi_st	Fst'	Smoothed Fst'	D_est	Smoothed D_est
10	OX359189.1	19003	-0.05814	-0.02151	-0.06139	-0.00439	-0.06209	-0.00171
22	OX359189.1	46056	-0.05692	-0.01704	-0.04260	0.00113	-0.04249	0.00410
62	OX359189.1	173646	-0.07843	0.00184	-0.08410	0.02307	-0.07729	0.02826
68	OX359189.1	187201	0.06301	0.00408	0.07039	0.02595	0.06417	0.03137
71	OX359189.1	199209	0.04889	0.00550	0.17495	0.02747	0.19571	0.03324
81	OX359189.1	239076	-0.02223	0.00880	-0.02415	0.03177	-0.02804	0.03841
108	OX359189.1	314888	0.15532	0.01148	0.14226	0.03953	0.16554	0.04812
165	OX359189.1	423169	-0.08434	0.01463	-0.09142	0.06012	-0.08566	0.07095
170	OX359189.1	432231	-0.05581	0.01526	-0.05756	0.06246	-0.05796	0.07338
190	OX359189.1	471820	0.00389	0.01886	0.03318	0.07303	0.01088	0.08413
235	OX359189.1	543399	-0.06780	0.02655	-0.07264	0.08896	0.10000	0.09933
263	OX359189.1	591633	-0.05814	0.03079	-0.06139	0.09423	-0.06209	0.10353
266	OX359189.1	593065	-0.01883	0.03090	0.39819	0.09431	0.40120	0.10357
270	OX359189.1	594023	-0.08434	0.03097	-0.09142	0.09436	-0.08566	0.10360
273	OX359189.1	601079	0.15533	0.03147	0.23205	0.09467	0.11458	0.10372
282	OX359189.1	619389	0.01597	0.03251	0.00963	0.09487	0.01428	0.10340
291	OX359189.1	636967	0.45433	0.03328	0.54573	0.09420	0.53941	0.10229
292	OX359189.1	637109	0.02640	0.03329	0.26150	0.09419	0.26367	0.10227
294	OX359189.1	638030	0.07916	0.03329	0.03389	0.09414	0.10148	0.10222
324	OX359189.1	681586	-0.05764	0.03345	-0.01996	0.08833	-0.01980	0.09516
401	OX359189.1	805355	-0.05692	0.02295	-0.04260	0.04973	-0.04249	0.05443
406	OX359189.1	815536	0.04063	0.02170	0.00235	0.04621	-0.00283	0.05092
409	OX359189.1	819812	0.02619	0.02118	-0.00422	0.04477	-0.01626	0.04948
414	OX359189.1	826450	0.01209	0.02037	0.05695	0.04257	0.05141	0.04731
472	OX359189.1	911117	0.07017	0.01202	0.00418	0.02225	0.02721	0.02828
486	OX359189.1	939729	0.09692	0.01050	0.08023	0.01912	0.12327	0.02578
487	OX359189.1	939732	-0.07143	0.01050	-0.07656	0.01912	-0.10664	0.02578
518	OX359189.1	982241	0.00802	0.00975	0.00762	0.01766	0.01011	0.02514
522	OX359189.1	994656	-0.07725	0.00989	-0.09859	0.01785	-0.08371	0.02543
527	OX359189.1	996453	-0.05814	0.00991	-0.06139	0.01789	-0.06209	0.02550
540	OX359189.1	1056851	-0.04961	0.01209	-0.03115	0.02054	-0.03321	0.02922
543	OX359189.1	1057851	0.06736	0.01208	0.24937	0.02053	0.25414	0.02922
584	OX359189.1	1081336	0.02740	0.01346	0.00351	0.02268	0.08907	0.03156
634	OX359189.1	1148804	0.01250	0.01790	-0.01331	0.02801	-0.00780	0.03725
644	OX359189.1	1156650	0.11634	0.01842	0.10161	0.02863	0.09850	0.03790
649	OX359189.1	1160348	-0.01286	0.01866	-0.00983	0.02891	-0.03889	0.03820
669	OX359189.1	1209181	-0.03616	0.02147	-0.02452	0.03285	0.00433	0.04236
678	OX359189.1	1233753	0.18502	0.02246	0.19344	0.03471	0.15796	0.04438
718	OX359189.1	1303944	-0.05589	0.02357	-0.04527	0.04083	0.03433	0.05111
723	OX359189.1	1313480	0.01405	0.02359	0.01465	0.04184	0.01345	0.05220
782	OX359189.1	1429956	0.19717	0.02474	0.22901	0.05923	0.16529	0.07012
783	OX359189.1	1429959	-0.06667	0.02474	-0.07087	0.05923	-0.08441	0.07012
810	OX359189.1	1469411	-0.07463	0.02657	-0.08039	0.06671	0.09174	0.07756
831	OX359189.1	1486088	0.07935	0.02742	0.05775	0.06983	0.06360	0.08063
836	OX359189.1	1490955	0.04518	0.02769	0.01375	0.07075	-0.02437	0.08153
843	OX359189.1	1507316	-0.05994	0.02894	-0.06348	0.07403	-0.06007	0.08474
849	OX359189.1	1516138	0.02101	0.02952	0.09364	0.07552	0.09880	0.08620
850	OX359189.1	1516141	-0.05814	0.02952	-0.06139	0.07552	-0.06209	0.08620
855	OX359189.1	1522820	0.11359	0.03002	0.40634	0.07678	0.42280	0.08743
931	OX359189.1	1638148	0.17277	0.04345	0.43044	0.09482	0.42873	0.10447
945	OX359189.1	1664391	0.05146	0.04813	0.09246	0.09703	0.10208	0.10628
955	OX359189.1	1672635	0.04057	0.04971	0.01049	0.09746	0.03004	0.10658
979	OX359189.1	1716808	-0.03659	0.05940	-0.00272	0.09809	0.00772	0.10638
1047	OX359189.1	1899368	0.04920	0.10638	0.00947	0.09256	-0.00793	0.09685
1053	OX359189.1	1908827	-0.03279	0.10817	-0.01551	0.09275	-0.01286	0.09688
1063	OX359189.1	1917587	0.07229	0.10974	0.01614	0.09297	0.02135	0.09697
1064	OX359189.1	1917590	0.30384	0.10974	0.22009	0.09297	0.25187	0.09697
1088	OX359189.1	1953800	0.17977	0.11532	0.16739	0.09423	0.16335	0.09768
1114	OX359189.1	2001095	0.17977	0.11937	0.16739	0.09480	0.16335	0.09767
1179	OX359189.1	2274017	0.02409	0.04816	0.00288	0.03838	0.01347	0.03827
1222	OX359189.1	2391895	0.15331	0.03542	0.12870	0.02945	0.13482	0.02984
1223	OX359189.1	2391898	-0.05814	0.03542	-0.06139	0.02945	-0.06209	0.02984
1238	OX359189.1	2415694	0.09283	0.03313	0.05948	0.02757	0.00546	0.02835
1239	OX359189.1	2415697	-0.03279	0.03312	-0.01551	0.02757	-0.01286	0.02835
1244	OX359189.1	2419702	0.01235	0.03273	0.00192	0.02724	-0.00397	0.02809
1274	OX359189.1	2456309	0.10606	0.02811	0.10129	0.02296	0.07977	0.02498
1279	OX359189.1	2463756	0.10387	0.02716	0.09852	0.02203	0.05730	0.02428
1285	OX359189.1	2467741	-0.01149	0.02658	0.01611	0.02147	0.12536	0.02385
1394	OX359189.1	2642747	-0.05994	-0.00470	-0.06348	-0.01180	-0.06007	0.00150
1418	OX359189.1	2671375	-0.02453	-0.00754	-0.00133	-0.01516	0.00691	0.00029
1450	OX359189.1	2731514	-0.06667	-0.01010	-0.07087	-0.01825	-0.06865	0.00127
1455	OX359189.1	2734832	-0.00587	-0.01013	-0.00575	-0.01829	-0.01103	0.00144
1466	OX359189.1	2749314	-0.05437	-0.01014	-0.04282	-0.01832	-0.03538	0.00226
1467	OX359189.1	2749317	0.03819	-0.01014	0.00898	-0.01832	-0.01801	0.00226
1473	OX359189.1	2756930	0.11486	-0.01009	0.01596	-0.01826	0.01233	0.00275
1475	OX359189.1	2761175	0.02730	-0.01006	-0.00492	-0.01819	0.01918	0.00306
1495	OX359189.1	2792144	-0.03554	-0.00947	-0.03053	-0.01737	-0.02881	0.00541
1497	OX359189.1	2793472	-0.05814	-0.00943	-0.06139	-0.01732	-0.06209	0.00552
1525	OX359189.1	2813399	-0.06207	-0.00878	-0.06596	-0.01637	-0.03383	0.00722
1532	OX359189.1	2819129	-0.06217	-0.00858	-0.04913	-0.01606	0.11678	0.00772
1533	OX359189.1	2820105	-0.05626	-0.00854	-0.02196	-0.01601	0.01060	0.00780
1579	OX359189.1	2895791	-0.05220	-0.00500	-0.12503	-0.01025	-0.11203	0.01449
1583	OX359189.1	2898814	0.03384	-0.00486	0.00462	-0.00998	0.24564	0.01472
1599	OX359189.1	2913530	0.11194	-0.00421	0.07959	-0.00872	0.06275	0.01580
1626	OX359189.1	2948788	0.11090	-0.00259	0.11810	-0.00548	0.12156	0.01804
1635	OX359189.1	2973590	-0.04762	-0.00134	-0.01207	-0.00309	0.00131	0.01937
1640	OX359189.1	2980765	0.12916	-0.00097	0.20073	-0.00240	0.22334	0.01971
1650	OX359189.1	2992624	-0.07582	-0.00034	-0.14735	-0.00125	-0.19094	0.02023
1661	OX359189.1	3007691	-0.05644	0.00053	-0.03731	0.00023	-0.03743	0.02084
1678	OX359189.1	3033253	-0.07463	0.00226	-0.08039	0.00276	-0.05085	0.02177
1687	OX359189.1	3043256	-0.02183	0.00305	-0.01503	0.00377	-0.01138	0.02211
1742	OX359189.1	3151096	-0.00983	0.01871	0.14444	0.01535	0.09390	0.02652
1779	OX359189.1	3210152	-0.03862	0.03231	-0.01749	0.02174	0.03414	0.02969
1788	OX359189.1	3214366	-0.06291	0.03333	-0.10527	0.02217	-0.03668	0.02988
1824	OX359189.1	3256315	0.04063	0.04335	0.00235	0.02597	-0.00283	0.03164
1844	OX359189.1	3279033	-0.05814	0.04859	-0.06139	0.02788	-0.06209	0.03228
1860	OX359189.1	3294935	0.45232	0.05181	0.34280	0.02896	0.33643	0.03267
1878	OX359189.1	3323882	0.08562	0.05715	0.00606	0.03078	-0.02015	0.03317
1904	OX359189.1	3381664	-0.05814	0.06636	-0.06139	0.03468	-0.06209	0.03443
1922	OX359189.1	3407739	0.06217	0.06998	0.00388	0.03667	-0.00329	0.03538
1993	OX359189.1	3527875	0.11194	0.08496	0.07959	0.05248	0.06275	0.04886
2057	OX359189.1	3655307	0.22301	0.06986	0.19519	0.05064	0.18756	0.05573
2131	OX359189.1	3770439	-0.06865	0.03731	-0.05474	0.02681	-0.07433	0.03957
2172	OX359189.1	3805659	-0.06035	0.03063	-0.06917	0.02139	0.03464	0.03520
2192	OX359189.1	3862700	0.13460	0.02326	0.09215	0.01523	0.08559	0.02992
2203	OX359189.1	3889295	0.07425	0.02092	0.06269	0.01317	0.05288	0.02805
2226	OX359189.1	3950232	-0.03279	0.01735	-0.01551	0.00982	-0.01286	0.02500
2228	OX359189.1	3961271	-0.02453	0.01689	-0.00133	0.00936	0.00691	0.02458
2238	OX359189.1	3980034	0.00592	0.01612	0.00063	0.00856	0.00332	0.02390
2239	OX359189.1	3980037	-0.02427	0.01612	-0.00170	0.00856	0.06900	0.02390
2244	OX359189.1	3997552	0.04768	0.01563	-0.00029	0.00797	0.01161	0.02338
2261	OX359189.1	4030765	-0.04345	0.01490	-0.01168	0.00699	0.01418	0.02255
2263	OX359189.1	4048084	0.07086	0.01461	0.01492	0.00653	0.00374	0.02218
2265	OX359189.1	4052978	0.01848	0.01454	0.00221	0.00640	0.04215	0.02208
2367	OX359189.1	4582287	-0.05814	0.01952	-0.06139	-0.00464	-0.06209	0.01330
2495	OX359189.1	4787297	-0.01896	0.06475	-0.00116	0.03158	0.07045	0.04847
2497	OX359189.1	4789325	-0.03282	0.06507	-0.00474	0.03190	0.09225	0.04871
2500	OX359189.1	4791154	0.01150	0.06536	0.00129	0.03219	0.01434	0.04893
2508	OX359189.1	4802610	-0.08108	0.06736	-0.08012	0.03424	-0.11266	0.05052
2510	OX359189.1	4804794	0.07017	0.06770	0.00418	0.03459	0.02721	0.05079
2524	OX359189.1	4824910	0.02041	0.07077	-0.00575	0.03791	0.00990	0.05324
2525	OX359189.1	4824913	0.24738	0.07077	0.17333	0.03791	0.17375	0.05324
2530	OX359189.1	4828899	0.23211	0.07136	0.03874	0.03858	0.05288	0.05373
2568	OX359189.1	4881594	0.13460	0.07842	0.09215	0.04792	0.08559	0.06057
2581	OX359189.1	4917309	-0.01134	0.08204	-0.00720	0.05425	-0.00328	0.06524
2641	OX359189.1	5033459	0.49481	0.08092	0.51609	0.06798	0.52107	0.07716
2644	OX359189.1	5038280	0.00826	0.08038	0.00104	0.06815	-0.01506	0.07742
2647	OX359189.1	5042290	-0.04532	0.07991	-0.02416	0.06826	-0.03902	0.07762
2661	OX359189.1	5054222	0.13625	0.07842	0.01722	0.06848	0.00387	0.07816
2725	OX359189.1	5174489	-0.01033	0.06239	-0.00128	0.06399	0.01115	0.07869
2738	OX359189.1	5191656	-0.04243	0.06081	-0.03738	0.06329	-0.01283	0.07860
2744	OX359189.1	5199417	-0.06166	0.06016	-0.06503	0.06288	-0.04055	0.07845
2756	OX359189.1	5229404	0.06088	0.05794	0.04923	0.06122	0.13658	0.07762
2757	OX359189.1	5229449	-0.03040	0.05794	-0.08186	0.06122	-0.07858	0.07762
2758	OX359189.1	5229452	0.11453	0.05794	0.30737	0.06122	0.31006	0.07762
2761	OX359189.1	5233053	-0.02453	0.05765	-0.00133	0.06096	0.00691	0.07743
2771	OX359189.1	5241886	0.23592	0.05723	0.21946	0.06059	0.22495	0.07717
2801	OX359189.1	5297418	-0.01010	0.05403	-0.01065	0.05718	-0.00787	0.07448
2813	OX359189.1	5316314	0.33266	0.05305	0.26208	0.05590	0.21136	0.07325
2820	OX359189.1	5319091	0.09210	0.05289	0.09724	0.05571	0.11330	0.07306
2821	OX359189.1	5319094	0.04248	0.05289	0.15061	0.05571	0.29343	0.07306
2823	OX359189.1	5321740	-0.00492	0.05269	0.02180	0.05548	0.05183	0.07282
2832	OX359189.1	5331310	-0.03554	0.05207	-0.03053	0.05475	-0.02881	0.07205
2874	OX359189.1	5382177	0.07003	0.04799	0.07096	0.05036	0.07329	0.06724
2885	OX359189.1	5393377	0.19296	0.04683	0.02588	0.04929	0.05797	0.06602
2909	OX359189.1	5424700	0.01597	0.04298	0.00963	0.04612	0.01428	0.06234
2931	OX359189.1	5454323	-0.03279	0.03867	-0.01551	0.04310	-0.01286	0.05875
2942	OX359189.1	5470234	-0.03279	0.03602	-0.01551	0.04144	-0.01286	0.05674
2961	OX359189.1	5530391	0.01405	0.02460	0.01465	0.03541	0.01345	0.04921
3016	OX359189.1	5601597	-0.05814	0.01264	-0.06139	0.03021	-0.06209	0.04167
3018	OX359189.1	5602571	0.10687	0.01251	0.00699	0.03015	0.12030	0.04158
3032	OX359189.1	5636808	0.11811	0.00852	0.47201	0.02839	0.47164	0.03858
3064	OX359189.1	5665942	-0.05814	0.00674	-0.06139	0.02752	-0.06209	0.03662
3071	OX359189.1	5679785	-0.03279	0.00621	-0.03457	0.02703	-0.03496	0.03559
3085	OX359189.1	5704243	-0.05814	0.00626	-0.06139	0.02673	-0.06209	0.03449
3127	OX359189.1	5769759	-0.03274	0.01230	-0.00187	0.02842	-0.01361	0.03424
3133	OX359189.1	5779052	-0.04368	0.01401	-0.00262	0.02913	-0.01454	0.03473
3136	OX359189.1	5784359	-0.05814	0.01506	-0.06139	0.02947	-0.06209	0.03496
3142	OX359189.1	5792703	0.04673	0.01679	0.04583	0.03018	0.03581	0.03550
3172	OX359189.1	5860321	0.00425	0.03499	0.01985	0.03801	0.04810	0.04215
3193	OX359189.1	5887414	0.19424	0.04367	0.17125	0.04164	0.19417	0.04523
3228	OX359189.1	5998143	0.28082	0.06661	0.16208	0.04661	0.15395	0.04710
3297	OX359189.1	6108982	0.06217	0.05311	0.00388	0.02919	-0.00329	0.02572
3303	OX359189.1	6114639	0.14837	0.05195	0.15497	0.02815	0.15638	0.02450
3316	OX359189.1	6131058	0.03612	0.04875	0.02862	0.02531	0.02390	0.02113
3336	OX359189.1	6167768	-0.03554	0.04141	-0.03053	0.01910	-0.02881	0.01377
3337	OX359189.1	6168079	0.00189	0.04135	0.00022	0.01905	-0.01331	0.01372
3346	OX359189.1	6178411	0.01150	0.03961	0.00129	0.01776	0.01434	0.01213
3377	OX359189.1	6233804	-0.02154	0.03147	-0.11701	0.01158	-0.12016	0.00439
3420	OX359189.1	6312967	0.06250	0.02641	0.06571	0.00988	-0.00834	0.00083
3421	OX359189.1	6312970	-0.03279	0.02641	-0.01551	0.00988	-0.01286	0.00083
3445	OX359189.1	6340942	-0.06641	0.02657	-0.10185	0.01155	-0.14203	0.00203
3482	OX359189.1	6375459	0.07935	0.02884	0.05775	0.01604	0.06360	0.00621
3493	OX359189.1	6384848	0.07003	0.02980	0.07096	0.01769	0.07329	0.00783
3562	OX359189.1	6628205	0.20970	0.06978	0.28982	0.08871	0.29134	0.08367
3630	OX359189.1	6730939	-0.02928	0.03707	-0.04788	0.05185	-0.06149	0.05103
3703	OX359189.1	6881720	-0.05814	0.00527	-0.06139	0.01275	-0.06209	0.02436
3752	OX359189.1	6984638	-0.05814	0.01345	-0.06139	0.02320	-0.06209	0.04222
3768	OX359189.1	6997407	0.01848	0.01458	0.00221	0.02427	0.04215	0.04391
3820	OX359189.1	7095299	0.28662	0.02140	0.17455	0.02910	0.18367	0.05192
3828	OX359189.1	7107455	0.05301	0.02188	0.43750	0.02903	0.52991	0.05199
3829	OX359189.1	7107458	-0.07843	0.02188	-0.08410	0.02903	-0.12043	0.05199
3853	OX359189.1	7141733	-0.07623	0.02290	-0.08139	0.02816	-0.06569	0.05119
3873	OX359189.1	7167729	-0.06889	0.02329	-0.11549	0.02685	-0.08696	0.04968
3876	OX359189.1	7172591	-0.03058	0.02334	-0.05507	0.02656	-0.03949	0.04933
3906	OX359189.1	7218644	0.07935	0.02358	0.05775	0.02341	0.06360	0.04529
3911	OX359189.1	7223647	0.03908	0.02356	0.00539	0.02300	0.15612	0.04478
3915	OX359189.1	7224746	-0.02212	0.02356	-0.00127	0.02291	0.02957	0.04467
3939	OX359189.1	7288376	0.08462	0.02384	0.08452	0.01832	0.08198	0.03820
3952	OX359189.1	7300479	0.15331	0.02400	0.12870	0.01759	0.13482	0.03712
3969	OX359189.1	7327510	-0.05814	0.02459	-0.06139	0.01629	-0.06209	0.03509
3973	OX359189.1	7330690	0.01150	0.02468	0.00129	0.01617	0.01434	0.03490
3996	OX359189.1	7388279	-0.07725	0.02743	-0.03489	0.01548	-0.04745	0.03332
4007	OX359189.1	7412159	-0.03422	0.02900	-0.01068	0.01599	-0.00800	0.03375
4022	OX359189.1	7437489	-0.06667	0.03122	-0.20782	0.01725	-0.22378	0.03519
4049	OX359189.1	7470071	-0.00935	0.03435	-0.02877	0.01954	0.01112	0.03794
4060	OX359189.1	7480132	0.11634	0.03536	0.10161	0.02038	0.10912	0.03900
4065	OX359189.1	7486543	0.09945	0.03591	0.08546	0.02088	0.11765	0.03961
4095	OX359189.1	7531826	0.21092	0.04010	0.18899	0.02504	0.31845	0.04493
4125	OX359189.1	7587722	0.13257	0.04285	0.14142	0.02885	0.14347	0.05003
4169	OX359189.1	7672286	-0.01809	0.03872	-0.03938	0.02863	0.04681	0.05041
4171	OX359189.1	7677913	-0.05692	0.03814	-0.04260	0.02831	-0.04249	0.04992
4196	OX359189.1	7709660	0.16192	0.03391	0.11744	0.02562	0.12814	0.04702
4272	OX359189.1	7839572	-0.06128	0.02357	-0.05696	0.01737	-0.06838	0.03886
4274	OX359189.1	7844578	0.01678	0.02377	0.01593	0.01746	0.04505	0.03901
4279	OX359189.1	7847698	-0.04387	0.02392	-0.00958	0.01753	0.00956	0.03913
4314	OX359189.1	7933697	-0.05692	0.03685	-0.04260	0.02760	-0.04249	0.05072
4330	OX359189.1	7946343	0.01476	0.03986	0.03928	0.03003	0.03614	0.05331
4349	OX359189.1	7978404	0.10687	0.04846	0.00699	0.03737	0.12030	0.06087
4432	OX359189.1	8101585	0.46491	0.07170	0.38015	0.06725	0.42922	0.08605
4459	OX359189.1	8141824	-0.00457	0.06967	-0.00061	0.07352	-0.02318	0.08886
4534	OX359189.1	8254796	-0.03554	0.04160	-0.03053	0.08254	-0.02881	0.08746
4539	OX359189.1	8257059	-0.05814	0.04095	-0.06139	0.08277	-0.06209	0.08749
4566	OX359189.1	8313516	0.03327	0.02693	0.25220	0.09126	0.24893	0.09143
4644	OX359189.1	8495177	0.00727	0.02212	0.21907	0.13812	0.19649	0.12772
4707	OX359189.1	8632387	0.10926	0.03014	0.27938	0.12463	0.25146	0.12596
4708	OX359189.1	8633918	0.01560	0.03009	0.01286	0.12413	0.00354	0.12576
4824	OX359189.1	8858587	-0.06780	0.00077	-0.07264	0.02581	0.10000	0.06832
4906	OX359189.1	8995076	0.02703	0.00037	0.00395	0.02236	0.04341	0.04975
4911	OX359189.1	9002907	-0.02183	0.00045	0.07469	0.02275	0.08306	0.04934
4922	OX359189.1	9026604	0.07935	0.00059	0.05775	0.02401	0.06360	0.04885
4948	OX359189.1	9104402	-0.05814	0.00088	-0.06139	0.02874	-0.06209	0.04972
4972	OX359189.1	9130896	0.05776	0.00099	0.04941	0.03068	0.14830	0.05133
4990	OX359189.1	9152506	-0.05581	0.00106	-0.05756	0.03233	-0.05796	0.05312
4991	OX359189.1	9152509	-0.02457	0.00106	-0.02193	0.03233	-0.02477	0.05312
4994	OX359189.1	9158969	-0.05692	0.00107	-0.04260	0.03279	-0.04249	0.05373
5024	OX359189.1	9196217	0.00696	0.00117	0.00316	0.03563	0.01961	0.05832
5027	OX359189.1	9197590	0.12272	0.00117	0.38492	0.03574	0.39271	0.05852
5135	OX359189.1	9457822	-0.00069	-0.01266	0.05518	0.01439	0.33293	0.09040
5136	OX359189.1	9459945	-0.04368	-0.01281	-0.00262	0.01387	0.05614	0.08991
5214	OX359189.1	9608652	0.00129	-0.01291	0.00364	-0.00782	0.03433	0.04494
5220	OX359189.1	9624479	0.02703	-0.01156	0.00395	-0.00811	0.10680	0.04131
5237	OX359189.1	9665429	-0.05049	-0.00704	-0.07492	-0.00772	-0.07433	0.03333
5248	OX359189.1	9684819	-0.03279	-0.00389	-0.00747	-0.00616	-0.00996	0.03111
5249	OX359189.1	9684822	-0.07383	-0.00389	-0.06776	-0.00616	-0.02001	0.03111
5342	OX359189.1	9853946	0.27204	0.05403	0.20323	0.03513	0.15408	0.04220
5474	OX359189.1	10334117	0.65303	0.64460	0.84713	0.62549	0.84741	0.62196
5480	OX359189.1	10353700	0.63697	0.64453	0.42488	0.62370	0.41791	0.62014
5535	OX359190.1	95218	-0.04342	-0.04032	-0.02922	-0.02776	0.06629	0.05575
5586	OX359190.1	425208	-0.01010	-0.02547	-0.01065	-0.02182	-0.00787	-0.01501
5596	OX359190.1	464407	-0.03554	-0.02593	-0.03053	-0.02172	-0.02881	-0.01543
5640	OX359190.1	625612	-0.03279	-0.02766	-0.03457	-0.01778	-0.03496	-0.00624
5702	OX359190.1	730424	-0.03441	-0.02675	0.00348	-0.01393	0.04995	-0.00002
5767	OX359190.1	854244	0.01405	-0.02688	0.01465	-0.01473	0.01345	-0.00333
5809	OX359190.1	916973	-0.02545	-0.02774	0.00289	-0.01676	0.00979	-0.00712
5812	OX359190.1	921687	-0.08434	-0.02780	-0.09142	-0.01693	-0.08566	-0.00740
5883	OX359190.1	1214921	-0.05166	-0.01031	-0.05547	-0.00546	-0.03806	-0.00006
5886	OX359190.1	1225164	0.02074	-0.00801	0.03443	-0.00350	0.03727	0.00162
5963	OX359190.1	1525485	0.00826	0.03837	0.00104	0.04416	-0.01506	0.04719
5975	OX359190.1	1529285	0.01597	0.03888	0.00963	0.04477	0.01428	0.04796
5977	OX359190.1	1530142	-0.00202	0.03900	-0.00102	0.04490	-0.00545	0.04813
5987	OX359190.1	1541728	-0.05814	0.04058	-0.06139	0.04681	-0.06209	0.05053
5989	OX359190.1	1544465	-0.03067	0.04096	-0.00186	0.04726	-0.01977	0.05110
6008	OX359190.1	1561918	0.32893	0.04343	0.32399	0.05028	0.28258	0.05487
6027	OX359190.1	1580453	-0.05644	0.04609	-0.03731	0.05360	-0.03743	0.05903
6050	OX359190.1	1656322	0.00189	0.05836	0.00022	0.06949	-0.01331	0.07805
6068	OX359190.1	1672926	0.15331	0.06134	0.12870	0.07350	0.13482	0.08264
6071	OX359190.1	1675070	0.09231	0.06172	0.06756	0.07401	0.13308	0.08323
6078	OX359190.1	1678395	0.02495	0.06234	0.00604	0.07485	0.03645	0.08418
6079	OX359190.1	1679301	0.01002	0.06250	0.10384	0.07506	0.09766	0.08443
6081	OX359190.1	1682729	-0.07623	0.06310	-0.08139	0.07590	-0.01202	0.08537
6112	OX359190.1	1742508	-0.01139	0.07383	-0.00612	0.09118	0.04207	0.10227
6116	OX359190.1	1743282	0.01150	0.07397	0.00129	0.09138	0.01434	0.10249
6125	OX359190.1	1761105	0.30135	0.07711	0.25556	0.09609	0.25018	0.10755
6144	OX359190.1	1784505	0.30260	0.08106	0.41868	0.10223	0.42002	0.11408
6167	OX359190.1	1836837	0.10148	0.08781	0.25170	0.11374	0.23501	0.12613
6248	OX359190.1	2030243	-0.04824	0.04806	-0.04375	0.06506	0.00636	0.07863
6311	OX359190.1	2235347	0.06101	0.00394	0.01423	-0.00624	0.01020	0.00065
6312	OX359190.1	2235350	-0.05632	0.00394	-0.11036	-0.00623	-0.11266	0.00065
6319	OX359190.1	2241986	0.02809	0.00411	0.04841	-0.00569	0.05183	0.00122
6369	OX359190.1	2381439	-0.02453	0.00948	-0.00133	0.01496	0.00691	0.02664
6449	OX359190.1	2468473	0.04385	0.01840	0.10305	0.03440	0.14611	0.05142
6549	OX359190.1	2762426	0.01597	0.06564	0.00963	0.04558	0.01428	0.06906
6560	OX359190.1	2774302	0.18432	0.06619	0.15633	0.04510	0.16397	0.06877
6603	OX359190.1	2866468	-0.07843	0.07275	-0.08410	0.04630	-0.02107	0.07000
6623	OX359190.1	2928552	0.09350	0.07897	0.02414	0.05100	0.12088	0.07281
6624	OX359190.1	2928555	-0.04762	0.07897	-0.01207	0.05100	0.00131	0.07281
6648	OX359190.1	2978026	0.05723	0.08308	0.08758	0.05576	0.07155	0.07504
6649	OX359190.1	2978029	0.21889	0.08308	0.05302	0.05576	0.05363	0.07504
6717	OX359190.1	3082340	0.48403	0.08114	0.37331	0.06113	0.40844	0.07311
6743	OX359190.1	3119380	0.03748	0.07559	0.10318	0.05993	0.05213	0.06906
6746	OX359190.1	3120994	-0.06780	0.07529	-0.07264	0.05984	-0.02375	0.06884
6771	OX359190.1	3170767	-0.03410	0.06252	-0.06376	0.05549	-0.06257	0.06123
6821	OX359190.1	3239629	-0.01461	0.03968	0.06630	0.04518	0.05648	0.04715
6886	OX359190.1	3375011	-0.05941	0.00502	-0.06302	0.03290	-0.09929	0.03777
6963	OX359190.1	3571347	0.12636	0.00727	0.56701	0.03975	0.66102	0.04716
6968	OX359190.1	3572621	0.00798	0.00729	0.01936	0.03979	0.03561	0.04714
6971	OX359190.1	3577312	-0.05285	0.00735	-0.07681	0.03992	0.06507	0.04706
6977	OX359190.1	3583111	-0.05112	0.00742	-0.03450	0.04008	-0.04055	0.04695
6981	OX359190.1	3588717	0.04212	0.00747	0.05403	0.04024	0.00854	0.04684
6993	OX359190.1	3601817	-0.05814	0.00753	-0.06139	0.04065	-0.06209	0.04655
7002	OX359190.1	3616605	0.00402	0.00746	-0.03411	0.04112	-0.03748	0.04619
7011	OX359190.1	3631354	0.09143	0.00732	0.03721	0.04169	0.01927	0.04587
7016	OX359190.1	3636928	0.05376	0.00723	0.00354	0.04191	-0.02158	0.04572
7049	OX359190.1	3681586	-0.01247	0.00664	-0.01275	0.04459	-0.02484	0.04512
7140	OX359190.1	3800833	-0.08434	0.00379	-0.09142	0.05351	-0.12920	0.04587
7167	OX359190.1	3825551	0.02549	0.00396	0.22438	0.05465	0.19128	0.04631
7170	OX359190.1	3830675	0.04441	0.00404	0.30167	0.05476	0.27350	0.04634
7189	OX359190.1	3863757	-0.04543	0.00517	-0.06633	0.05452	-0.06178	0.04619
7205	OX359190.1	3897376	-0.03276	0.00806	0.07367	0.05322	0.03561	0.04580
7271	OX359190.1	4001985	0.06217	0.02277	0.00388	0.04469	-0.00329	0.04332
7310	OX359190.1	4051882	-0.02212	0.03226	-0.00127	0.04315	0.02957	0.04363
7327	OX359190.1	4079748	0.01848	0.03808	0.01554	0.04415	0.06639	0.04525
7328	OX359190.1	4079751	-0.05437	0.03808	-0.04282	0.04415	-0.03538	0.04525
7338	OX359190.1	4091902	0.26949	0.04068	0.26848	0.04495	0.25181	0.04622
7360	OX359190.1	4124874	0.03612	0.04856	0.02862	0.04840	0.02390	0.04963
7373	OX359190.1	4141766	-0.05814	0.05284	-0.06139	0.05084	-0.06209	0.05193
7405	OX359190.1	4210841	-0.02148	0.07025	-0.01932	0.06346	-0.00716	0.06379
7452	OX359190.1	4296141	0.08587	0.08521	0.00622	0.07768	0.01255	0.07906
7467	OX359190.1	4320903	0.37589	0.08703	0.13086	0.08022	0.09234	0.08238
7479	OX359190.1	4327803	0.05244	0.08729	0.02781	0.08072	0.03746	0.08313
7480	OX359190.1	4327806	0.10311	0.08729	0.40778	0.08072	0.30876	0.08313
7487	OX359190.1	4333997	-0.00256	0.08744	-0.00156	0.08110	-0.03448	0.08376
7494	OX359190.1	4348747	0.15602	0.08757	0.09134	0.08176	0.08095	0.08505
7513	OX359190.1	4393141	0.01848	0.08550	0.00221	0.08177	0.04215	0.08703
7518	OX359190.1	4397080	0.13080	0.08518	0.05849	0.08165	0.06832	0.08707
7527	OX359190.1	4413035	0.39181	0.08369	0.39836	0.08096	0.41133	0.08707
7529	OX359190.1	4415596	-0.00014	0.08343	-0.00013	0.08083	0.04489	0.08705
7533	OX359190.1	4418165	0.14621	0.08316	0.16914	0.08069	0.17966	0.08701
7563	OX359190.1	4486682	-0.01010	0.07443	-0.01065	0.07526	-0.00787	0.08370
7577	OX359190.1	4504102	0.00487	0.07214	0.00603	0.07371	0.05567	0.08240
7578	OX359190.1	4504681	-0.05880	0.07207	-0.05323	0.07366	-0.03448	0.08235
7592	OX359190.1	4525961	0.15313	0.06931	0.27636	0.07177	0.28631	0.08059
7603	OX359190.1	4531931	-0.02427	0.06867	-0.00170	0.07137	0.02586	0.08016
7619	OX359190.1	4574205	0.02703	0.06392	0.02568	0.06817	0.08714	0.07653
7625	OX359190.1	4588123	0.01639	0.06271	0.00222	0.06738	0.00280	0.07542
7626	OX359190.1	4599548	-0.00685	0.06184	-0.03463	0.06689	-0.05042	0.07463
7630	OX359190.1	4604066	0.08547	0.06149	0.02034	0.06668	0.04215	0.07428
7643	OX359190.1	4619179	0.07003	0.06043	0.07096	0.06609	0.07329	0.07318
7672	OX359190.1	4651605	0.03612	0.05862	0.02862	0.06525	0.02390	0.07106
7674	OX359190.1	4652322	0.07336	0.05859	0.06529	0.06523	0.05516	0.07101
7705	OX359190.1	4683785	0.20706	0.05737	0.19455	0.06488	0.22872	0.06920
7717	OX359190.1	4698814	-0.07536	0.05681	-0.07109	0.06468	-0.10714	0.06826
7738	OX359190.1	4736555	0.08072	0.05560	0.26711	0.06417	0.26810	0.06585
7746	OX359190.1	4755675	0.13460	0.05492	0.09215	0.06372	0.08559	0.06443
7748	OX359190.1	4758334	-0.00324	0.05483	-0.00247	0.06363	-0.05229	0.06421
7816	OX359190.1	4908754	-0.05581	0.04274	-0.05756	0.03741	-0.05796	0.03940
7879	OX359190.1	5034072	0.12583	0.02893	0.01665	-0.00720	0.01020	0.02145
7941	OX359190.1	5141611	-0.00202	0.02105	-0.00102	-0.02465	-0.00545	0.02736
7958	OX359190.1	5210187	-0.01032	0.01899	0.02766	-0.02623	0.05389	0.03124
7960	OX359190.1	5215414	-0.04972	0.01897	-0.25880	-0.02606	0.12128	0.03147
7975	OX359190.1	5262411	0.03378	0.01933	0.00205	-0.02371	0.00942	0.03280
7986	OX359190.1	5288473	0.08547	0.02002	0.02034	-0.02181	0.04215	0.03302
8002	OX359190.1	5369102	-0.03967	0.02454	-0.00273	-0.01362	-0.02016	0.03207
8022	OX359190.1	5508501	0.07915	0.03226	0.01742	-0.00217	0.08594	0.02249
8042	OX359190.1	5587319	0.09677	0.02989	0.06253	-0.00326	0.06061	0.01217
8050	OX359190.1	5628344	-0.04961	0.02636	-0.07997	-0.00544	-0.08410	0.00668
8113	OX359190.1	5843468	-0.03072	0.01848	-0.02200	0.00856	-0.03911	0.02163
8161	OX359190.1	6045211	0.08643	0.04766	0.03456	0.05521	0.17425	0.06959
8181	OX359190.1	6091616	-0.00457	0.04796	-0.00061	0.05716	0.01433	0.06843
8186	OX359190.1	6094166	0.05094	0.04800	0.02761	0.05715	-0.00703	0.06824
8216	OX359190.1	6162738	0.02064	0.04514	0.00500	0.05441	-0.01237	0.06147
8233	OX359190.1	6196482	0.13460	0.04312	0.45956	0.05149	0.45596	0.05690
8238	OX359190.1	6198904	0.28082	0.04297	0.16208	0.05125	0.15395	0.05655
8239	OX359190.1	6198907	-0.02453	0.04297	-0.00133	0.05125	0.00691	0.05655
8261	OX359190.1	6230682	-0.05814	0.04087	-0.06139	0.04777	-0.06209	0.05171
8269	OX359190.1	6238118	-0.03921	0.04036	0.00541	0.04688	0.03775	0.05052
8279	OX359190.1	6257832	-0.07384	0.03890	-0.07083	0.04433	-0.03659	0.04719
8298	OX359190.1	6278582	0.16824	0.03750	0.02466	0.04165	-0.00565	0.04372
8312	OX359190.1	6297499	0.03612	0.03632	0.02862	0.03922	0.02390	0.04061
8335	OX359190.1	6317592	0.05395	0.03519	0.18433	0.03668	0.19499	0.03732
8345	OX359190.1	6326098	0.08587	0.03473	0.00622	0.03562	0.01255	0.03594
8377	OX359190.1	6376375	0.07003	0.03258	0.07096	0.02994	0.07329	0.02839
8387	OX359190.1	6383816	0.01595	0.03236	-0.00192	0.02921	0.00488	0.02738
8390	OX359190.1	6388153	-0.04590	0.03225	-0.08519	0.02881	-0.08557	0.02681
8408	OX359190.1	6406468	-0.07843	0.03181	-0.08410	0.02718	-0.07729	0.02448
8423	OX359190.1	6413608	0.00189	0.03164	0.00022	0.02654	-0.01331	0.02357
8425	OX359190.1	6419468	-0.00202	0.03155	-0.00102	0.02610	-0.00545	0.02290
8443	OX359190.1	6454447	-0.02457	0.03150	-0.02193	0.02414	-0.02477	0.01969
8495	OX359190.1	6532574	0.28536	0.03202	0.19328	0.02210	0.13712	0.01546
8502	OX359190.1	6538023	0.06768	0.03205	0.06667	0.02206	0.06275	0.01534
8504	OX359190.1	6541116	0.00277	0.03206	0.00297	0.02204	-0.03528	0.01528
8507	OX359190.1	6543958	0.12800	0.03209	0.04665	0.02204	0.03537	0.01523
8518	OX359190.1	6552392	-0.05764	0.03208	-0.01996	0.02200	-0.01980	0.01514
8604	OX359190.1	6689984	-0.02457	0.03072	-0.02193	0.02361	-0.02477	0.02141
8608	OX359190.1	6698268	-0.04961	0.03073	-0.03115	0.02392	-0.03321	0.02231
8650	OX359190.1	6763271	0.13460	0.03287	0.09215	0.02734	0.08559	0.03096
8658	OX359190.1	6781610	-0.02453	0.03422	-0.00133	0.02855	0.00691	0.03370
8697	OX359190.1	6848639	-0.04961	0.04225	-0.03115	0.03520	-0.03321	0.04575
8705	OX359190.1	6862263	-0.05632	0.04449	-0.08571	0.03689	-0.08571	0.04846
8718	OX359190.1	6880450	0.02812	0.04765	0.14332	0.03918	0.14530	0.05207
8723	OX359190.1	6881458	0.08462	0.04783	0.08452	0.03931	0.08198	0.05227
8734	OX359190.1	6892722	0.21250	0.04989	0.10203	0.04080	0.11067	0.05450
8748	OX359190.1	6903745	-0.01896	0.05199	-0.00116	0.04232	0.07045	0.05672
8805	OX359190.1	7010789	0.22006	0.07290	0.09568	0.05779	0.21525	0.07632
8823	OX359190.1	7043442	-0.05606	0.07720	-0.08160	0.06126	-0.08557	0.07964
8889	OX359190.1	7133585	0.49125	0.07694	0.58604	0.06186	0.61476	0.07803
8891	OX359190.1	7134283	0.01597	0.07687	0.00963	0.06182	0.01428	0.07796
8919	OX359190.1	7181621	-0.04469	0.07037	-0.14065	0.05708	-0.13941	0.07202
8933	OX359190.1	7201207	0.28662	0.06667	0.17455	0.05424	0.18367	0.06884
8937	OX359190.1	7203202	-0.02212	0.06626	-0.00127	0.05393	0.02957	0.06850
8963	OX359190.1	7228243	0.07229	0.06081	0.01614	0.04966	0.02135	0.06399
8964	OX359190.1	7228755	0.01597	0.06069	0.00963	0.04957	0.01428	0.06389
8968	OX359190.1	7233706	-0.02453	0.05962	-0.00133	0.04870	0.00691	0.06300
9004	OX359190.1	7290384	0.01116	0.04535	0.14440	0.03701	0.12281	0.05157
9020	OX359190.1	7315404	0.03378	0.03875	0.00205	0.03143	0.00942	0.04638
9045	OX359190.1	7362435	0.17241	0.02579	0.07246	0.02000	0.14163	0.03589
9057	OX359190.1	7374567	-0.05814	0.02258	-0.06139	0.01710	-0.06209	0.03325
9073	OX359190.1	7409122	0.02235	0.01403	0.08631	0.00907	0.12281	0.02589
9076	OX359190.1	7410831	-0.05644	0.01362	-0.03731	0.00869	-0.03743	0.02554
9131	OX359190.1	7492451	-0.00548	-0.00232	-0.00472	-0.00761	0.00582	0.00976
9133	OX359190.1	7493551	-0.06284	-0.00243	-0.06284	-0.00771	0.02067	0.00967
9144	OX359190.1	7511751	-0.04456	-0.00479	-0.06308	-0.01052	-0.06690	0.00671
9164	OX359190.1	7540611	-0.04980	-0.00713	-0.05189	-0.01393	0.02620	0.00281
9194	OX359190.1	7579377	0.05376	-0.00813	0.00354	-0.01647	-0.02158	-0.00100
9198	OX359190.1	7580803	-0.05387	-0.00811	-0.05253	-0.01652	-0.05381	-0.00110
9225	OX359190.1	7617666	-0.01289	-0.00615	-0.01944	-0.01683	-0.02489	-0.00314
9321	OX359190.1	7857645	0.19794	0.10578	0.09884	0.08396	0.08226	0.07393
9361	OX359190.1	7978655	0.28662	0.09657	0.17455	0.09156	0.18367	0.07941
9391	OX359190.1	8011335	0.03867	0.08534	0.26244	0.08346	0.20255	0.07228
9409	OX359190.1	8022143	0.00189	0.08118	0.00022	0.08023	-0.01331	0.06950
9475	OX359190.1	8135849	0.00450	0.04283	-0.00031	0.04389	-0.00167	0.03779
9515	OX359190.1	8207862	0.08462	0.03005	0.08452	0.03137	0.08198	0.02699
9535	OX359190.1	8256680	-0.04368	0.02745	-0.00262	0.02980	0.02555	0.02592
9544	OX359190.1	8263326	-0.05814	0.02744	-0.06139	0.02997	-0.06209	0.02614
9545	OX359190.1	8263329	0.14621	0.02744	0.01771	0.02997	0.01266	0.02614
9595	OX359190.1	8326686	-0.04961	0.03093	-0.03115	0.03519	-0.03321	0.03168
9619	OX359190.1	8351700	-0.02457	0.03398	-0.02193	0.03868	-0.02477	0.03527
9638	OX359190.1	8363120	-0.04972	0.03551	-0.01707	0.04029	-0.05836	0.03693
9654	OX359190.1	8385171	-0.05692	0.03892	-0.04260	0.04370	-0.04249	0.04048
9669	OX359190.1	8395484	0.10387	0.04067	0.10618	0.04535	0.04731	0.04221
9682	OX359190.1	8406002	0.01597	0.04251	0.00963	0.04700	0.01428	0.04396
9716	OX359190.1	8455252	0.24819	0.05158	0.36561	0.05444	0.36789	0.05194
9722	OX359190.1	8460735	0.02697	0.05264	0.02809	0.05521	0.05128	0.05279
9726	OX359190.1	8464291	0.02575	0.05333	0.12276	0.05557	0.12621	0.05324
9756	OX359190.1	8544028	-0.03279	0.06615	-0.01551	0.06364	-0.01286	0.06280
9774	OX359190.1	8572049	0.36311	0.06861	0.10235	0.06469	0.11789	0.06455
9779	OX359190.1	8577065	0.18329	0.06889	0.06394	0.06477	0.04193	0.06476
9790	OX359190.1	8583233	-0.06418	0.06916	-0.02371	0.06482	-0.00565	0.06499
9828	OX359190.1	8636657	0.13222	0.06799	0.21285	0.06318	0.20364	0.06496
9831	OX359190.1	8637695	0.11007	0.06790	0.01375	0.06312	-0.03599	0.06492
9913	OX359190.1	8738974	0.00277	0.05213	0.00297	0.05320	0.07928	0.05779
9929	OX359190.1	8774026	0.11872	0.04528	0.14332	0.04894	0.14530	0.05410
9944	OX359190.1	8796134	0.05616	0.04144	0.13266	0.04656	0.14163	0.05189
9952	OX359190.1	8803992	-0.05479	0.04026	-0.06566	0.04584	-0.06882	0.05121
9958	OX359190.1	8819768	-0.03659	0.03804	-0.00272	0.04443	0.00772	0.04981
9979	OX359190.1	8850415	0.01597	0.03457	0.00963	0.04213	0.01428	0.04731
9996	OX359190.1	8891417	-0.01247	0.03264	-0.02222	0.04065	-0.02094	0.04509
10003	OX359190.1	8901559	-0.02453	0.03264	-0.00133	0.04057	0.00691	0.04478
10021	OX359190.1	8964292	0.08462	0.03628	0.08452	0.04222	0.08198	0.04477
10074	OX359190.1	9077659	-0.04943	0.04710	-0.02968	0.04767	-0.03448	0.04932
10110	OX359190.1	9126195	0.16036	0.04704	0.18168	0.04628	0.12214	0.04910
10140	OX359190.1	9155155	0.47445	0.04533	0.39204	0.04437	0.41226	0.04827
10165	OX359190.1	9176570	-0.00293	0.04343	-0.01052	0.04251	-0.01404	0.04738
10177	OX359190.1	9199137	0.06164	0.04129	0.01498	0.04028	0.04706	0.04632
10190	OX359190.1	9211378	-0.06485	0.04020	-0.06870	0.03996	-0.04446	0.04670
10217	OX359190.1	9243439	-0.03279	0.03693	-0.01551	0.03765	-0.01286	0.04636
10255	OX359190.1	9293637	-0.05448	0.03327	-0.01557	0.03554	-0.01673	0.04766
10258	OX359190.1	9298228	-0.03435	0.03308	-0.00185	0.03552	0.00662	0.04795
10302	OX359190.1	9426680	0.14837	0.04029	0.15497	0.05053	0.15638	0.06957
10338	OX359190.1	9465145	-0.05053	0.04590	-0.00568	0.06067	-0.00590	0.08006
10343	OX359190.1	9467792	0.08154	0.04630	0.00134	0.06143	0.15813	0.08082
10369	OX359190.1	9501935	-0.08434	0.05161	-0.09142	0.07195	0.01272	0.09087
10372	OX359190.1	9503160	-0.06284	0.05180	-0.06284	0.07234	-0.02671	0.09123
10385	OX359190.1	9520264	0.17357	0.05431	0.15214	0.07784	0.10608	0.09628
10389	OX359190.1	9537975	0.05046	0.05686	0.03443	0.08368	0.04372	0.10154
10393	OX359190.1	9549924	0.06217	0.05840	0.00388	0.08749	-0.00329	0.10481
10455	OX359190.1	9632078	0.19296	0.06489	0.02588	0.10980	0.05797	0.12275
10469	OX359190.1	9652587	0.22192	0.06534	0.72095	0.11351	0.72103	0.12516
10478	OX359190.1	9667373	0.09287	0.06550	0.27901	0.11544	0.26004	0.12613
10503	OX359190.1	9703513	-0.05581	0.06429	-0.05756	0.11700	-0.05796	0.12543
10571	OX359190.1	9822438	0.01150	0.05444	0.00129	0.09352	0.01434	0.09511
10577	OX359190.1	9829216	-0.04961	0.05399	-0.03115	0.09138	-0.03321	0.09264
10633	OX359190.1	9942652	0.14837	0.05305	0.15497	0.06040	0.15638	0.05743
10673	OX359190.1	9996471	0.09283	0.05487	0.06599	0.05162	0.01091	0.04790
10695	OX359190.1	10046667	0.04527	0.05614	0.04565	0.04584	0.04215	0.04208
10711	OX359190.1	10071314	-0.03597	0.05652	-0.03660	0.04352	-0.01036	0.03988
10733	OX359190.1	10107361	0.10807	0.05620	0.04217	0.03894	0.03547	0.03555
10814	OX359191.1	75712	-0.05692	-0.00038	-0.04260	0.00180	-0.04249	0.00970
10821	OX359191.1	86789	-0.05223	0.00098	-0.03874	0.00306	-0.03743	0.01136
10849	OX359191.1	161277	0.07935	0.01058	0.05775	0.01215	0.06360	0.02326
10869	OX359191.1	190403	0.00802	0.01388	0.00762	0.01549	0.01011	0.02778
10905	OX359191.1	285686	-0.05200	0.02514	-0.09771	0.02810	-0.09929	0.04314
10934	OX359191.1	308460	-0.01301	0.02842	-0.00925	0.03176	0.06082	0.04721
10936	OX359191.1	318281	0.15331	0.03003	0.12870	0.03374	0.13482	0.04924
10945	OX359191.1	321962	0.14368	0.03065	0.21585	0.03445	0.17127	0.04998
10951	OX359191.1	330950	-0.01468	0.03222	-0.00097	0.03624	0.13088	0.05185
10972	OX359191.1	349344	-0.04195	0.03576	-0.00269	0.04031	-0.01363	0.05598
11003	OX359191.1	381069	-0.04825	0.04283	-0.03441	0.04861	-0.04470	0.06406
11090	OX359191.1	568511	0.28662	0.08949	0.17455	0.12011	0.18367	0.12565
11111	OX359191.1	607866	0.26000	0.09008	0.25360	0.12768	0.24812	0.13043
11114	OX359191.1	620049	-0.00358	0.08955	-0.00380	0.12914	0.07508	0.13108
11137	OX359191.1	650435	-0.00425	0.08787	0.09581	0.13168	0.10213	0.13180
11176	OX359191.1	711404	-0.07143	0.08097	-0.07656	0.12988	-0.10664	0.12718
11179	OX359191.1	712071	0.30622	0.08089	0.66207	0.12983	0.66539	0.12711
11186	OX359191.1	723555	-0.02457	0.07950	-0.02193	0.12890	-0.02477	0.12579
11190	OX359191.1	725638	0.11421	0.07925	0.09880	0.12871	0.05363	0.12554
11210	OX359191.1	761655	0.06611	0.07518	0.22755	0.12497	0.17175	0.12083
11228	OX359191.1	806975	-0.05814	0.07166	-0.06139	0.11930	-0.06209	0.11488
11245	OX359191.1	860606	0.10781	0.07051	0.07450	0.11264	0.10971	0.10910
11268	OX359191.1	893126	0.02717	0.07245	-0.00348	0.11007	-0.00624	0.10765
11341	OX359191.1	1011344	-0.05053	0.08571	-0.00568	0.10261	-0.00590	0.10626
11384	OX359191.1	1070845	0.49612	0.08417	0.55627	0.09164	0.56487	0.09722
11475	OX359191.1	1183835	-0.05814	0.06844	-0.06139	0.06358	-0.06209	0.06957
11497	OX359191.1	1224446	-0.07143	0.06385	-0.07656	0.05642	0.01079	0.06185
11507	OX359191.1	1248418	0.13386	0.06194	0.04583	0.05338	0.00272	0.05839
11510	OX359191.1	1250613	0.10370	0.06181	0.17375	0.05315	0.18335	0.05812
11511	OX359191.1	1250616	0.36364	0.06181	0.26519	0.05315	0.27386	0.05812
11522	OX359191.1	1262086	-0.03554	0.06135	-0.03053	0.05216	-0.02881	0.05692
11533	OX359191.1	1276296	-0.03554	0.06089	-0.03053	0.05108	-0.02881	0.05556
11534	OX359191.1	1282216	-0.05814	0.06078	-0.06139	0.05073	-0.06209	0.05508
11578	OX359191.1	1349054	-0.02453	0.06342	-0.00133	0.05074	0.00691	0.05355
11581	OX359191.1	1354080	-0.05581	0.06392	-0.05756	0.05103	-0.05796	0.05372
11609	OX359191.1	1401047	0.07003	0.07040	0.07096	0.05560	0.07329	0.05707
11618	OX359191.1	1412394	-0.01166	0.07238	-0.09074	0.05710	-0.07472	0.05836
11622	OX359191.1	1421877	0.36260	0.07426	0.34898	0.05858	0.31034	0.05960
11710	OX359191.1	1585619	0.40818	0.09766	0.32527	0.07927	0.30725	0.07823
11739	OX359191.1	1676587	-0.04368	0.06997	-0.00262	0.06278	0.02555	0.06389
11788	OX359191.1	1766054	0.02439	0.04232	0.01754	0.05144	-0.02679	0.05520
11816	OX359191.1	1807226	0.08761	0.03969	0.06489	0.05801	0.05830	0.06240
11819	OX359191.1	1812028	-0.05814	0.03978	-0.06139	0.05925	-0.06209	0.06368
11850	OX359191.1	1856435	-0.07143	0.04451	-0.07656	0.07526	0.01079	0.07984
11865	OX359191.1	1896103	-0.02457	0.05369	-0.02193	0.09522	-0.02477	0.09956
11901	OX359191.1	1984577	0.10915	0.08209	0.13371	0.14431	0.12366	0.14704
11936	OX359191.1	2034636	0.00277	0.09498	0.00040	0.16298	-0.01134	0.16468
11942	OX359191.1	2038821	0.15301	0.09525	0.63882	0.16353	0.63986	0.16517
11976	OX359191.1	2084891	0.42394	0.09967	0.43651	0.16686	0.43916	0.16775
11998	OX359191.1	2128373	0.07935	0.09573	0.05775	0.15602	0.06360	0.15639
12046	OX359191.1	2202524	0.02090	0.07269	0.08008	0.11250	0.06692	0.11248
12085	OX359191.1	2276433	-0.01730	0.04398	-0.04411	0.06088	-0.03528	0.06046
12116	OX359191.1	2325938	-0.03458	0.03070	-0.03036	0.03537	-0.01576	0.03471
12166	OX359191.1	2420234	-0.02167	0.02249	-0.01327	0.01324	-0.03399	0.01280
12168	OX359191.1	2420701	-0.03554	0.02248	-0.02857	0.01320	-0.02857	0.01276
12173	OX359191.1	2431309	-0.03554	0.02252	-0.03053	0.01225	-0.02881	0.01195
12199	OX359191.1	2462966	0.13460	0.02309	0.09215	0.01032	0.08559	0.01070
12223	OX359191.1	2487657	0.03612	0.02394	0.02862	0.00965	0.02390	0.01087
12250	OX359191.1	2536868	0.12583	0.02490	0.01665	0.00816	0.01020	0.01202
12264	OX359191.1	2547194	0.00802	0.02527	0.00762	0.00824	0.01011	0.01286
12286	OX359191.1	2657414	-0.02453	0.02489	-0.00133	0.00642	0.00519	0.02478
12302	OX359191.1	2746698	0.01707	0.02006	-0.01765	0.00197	0.11051	0.03897
12479	OX359191.1	3900231	-0.02639	-0.02596	-0.00136	-0.00135	-0.00000	-0.00028
12526	OX359191.1	4307569	-0.00240	-0.00723	-0.00099	-0.00087	-0.01566	-0.00429
12531	OX359191.1	4333307	-0.02639	-0.00505	-0.00136	-0.00085	-0.00000	-0.00403
12564	OX359191.1	4476555	-0.02086	0.01290	0.00348	-0.00044	-0.00806	-0.00299
12579	OX359191.1	4503912	0.01150	0.01697	0.00129	-0.00025	0.01434	-0.00286
12581	OX359191.1	4515541	-0.02639	0.01868	-0.00136	-0.00016	-0.00000	-0.00280
12623	OX359191.1	4579698	-0.03554	0.02701	-0.03053	0.00043	-0.02881	-0.00239
12639	OX359191.1	4610748	0.13625	0.02981	0.01722	0.00074	0.00387	-0.00212
12649	OX359191.1	4658460	0.13625	0.03192	0.01722	0.00146	0.00387	-0.00131
12679	OX359191.1	4713208	0.04712	0.02973	0.00260	0.00214	-0.00000	-0.00017
12747	OX359191.1	4849873	0.01150	0.01660	0.00129	0.00641	0.01434	0.00656
12753	OX359191.1	4853519	-0.02639	0.01642	-0.00136	0.00660	-0.00000	0.00683
12760	OX359191.1	4856276	-0.02639	0.01630	-0.00136	0.00674	-0.00000	0.00703
12787	OX359191.1	4916472	-0.03274	0.01653	-0.00187	0.01042	-0.01361	0.01222
12870	OX359191.1	5069457	0.13460	0.03320	0.09215	0.02145	0.08559	0.02824
12917	OX359191.1	5135436	-0.05387	0.04079	-0.05253	0.02732	-0.05381	0.03637
12918	OX359191.1	5135439	0.01597	0.04079	0.00963	0.02733	0.01428	0.03637
12922	OX359191.1	5146570	0.10893	0.04225	0.08393	0.02871	0.10782	0.03814
12934	OX359191.1	5154536	-0.05581	0.04336	-0.05756	0.02979	-0.05796	0.03950
12942	OX359191.1	5164156	-0.02212	0.04476	-0.00127	0.03127	0.02957	0.04133
12956	OX359191.1	5182718	0.23077	0.04797	0.13001	0.03456	0.14163	0.04517
12993	OX359191.1	5244208	-0.05167	0.06173	-0.05381	0.04985	-0.05364	0.06249
13046	OX359191.1	5317606	-0.02212	0.08566	-0.00127	0.07580	0.02957	0.09060
13122	OX359191.1	5426093	0.39781	0.11418	0.41337	0.10310	0.47245	0.11811
13143	OX359191.1	5463111	0.18918	0.11675	0.22013	0.10345	0.30911	0.11789
13145	OX359191.1	5463164	0.17977	0.11675	0.16739	0.10344	0.16335	0.11789
13148	OX359191.1	5464435	0.01405	0.11678	0.01465	0.10338	0.01345	0.11781
13152	OX359191.1	5470095	0.30135	0.11683	0.25556	0.10302	0.25018	0.11736
13154	OX359191.1	5471350	-0.02457	0.11683	-0.02193	0.10293	-0.02477	0.11725
13222	OX359191.1	5621600	-0.02385	0.09323	-0.01199	0.06780	0.00280	0.08146
13227	OX359191.1	5625181	0.07935	0.09230	0.05775	0.06668	0.06360	0.08037
13228	OX359191.1	5626841	0.20564	0.09186	0.19803	0.06616	0.13562	0.07986
13231	OX359191.1	5627516	0.15493	0.09168	0.02386	0.06595	-0.00950	0.07965
13266	OX359191.1	5689020	0.02697	0.07415	0.02809	0.04697	0.02905	0.06098
13290	OX359191.1	5713853	0.03378	0.06653	0.00205	0.03964	0.00942	0.05351
13295	OX359191.1	5723383	0.09692	0.06352	0.08023	0.03689	0.26212	0.05066
13297	OX359191.1	5724563	0.12226	0.06315	0.03365	0.03655	0.14163	0.05030
13299	OX359191.1	5726532	0.15493	0.06252	0.02386	0.03599	-0.01533	0.04972
13322	OX359191.1	5756415	0.05080	0.05270	0.05944	0.02760	0.05830	0.04072
13360	OX359191.1	5826069	-0.07143	0.03008	-0.07656	0.01051	-0.09610	0.02083
13403	OX359191.1	5896905	-0.04806	0.01083	-0.06160	-0.00200	-0.06325	0.00434
13406	OX359191.1	5899280	-0.00457	0.01034	-0.00061	-0.00228	-0.01733	0.00393
13428	OX359191.1	5941979	-0.04813	0.00297	-0.02732	-0.00633	0.00857	-0.00227
13436	OX359191.1	5951193	-0.02841	0.00200	-0.02874	-0.00670	-0.06061	-0.00304
13459	OX359191.1	5994197	0.01405	0.00005	0.01465	-0.00634	0.01345	-0.00428
13460	OX359191.1	5994200	-0.03554	0.00005	-0.03053	-0.00634	-0.02881	-0.00428
13471	OX359191.1	6006993	0.01249	0.00028	-0.00264	-0.00570	-0.01855	-0.00391
13512	OX359191.1	6078260	-0.03868	0.00626	-0.01198	0.00165	0.04901	0.00230
13525	OX359191.1	6101145	0.06250	0.01035	0.00510	0.00584	-0.03449	0.00630
13549	OX359191.1	6143927	-0.06162	0.01933	-0.04305	0.01474	-0.01680	0.01506
13552	OX359191.1	6146282	0.09091	0.01987	0.02778	0.01528	-0.01680	0.01559
13573	OX359191.1	6198093	-0.03967	0.03230	-0.00273	0.02749	-0.02034	0.02777
13574	OX359191.1	6200005	-0.02148	0.03278	-0.01932	0.02795	-0.00716	0.02824
13605	OX359191.1	6259783	0.23592	0.04657	0.21946	0.04096	0.22495	0.04169
13624	OX359191.1	6335824	0.00592	0.05820	0.00063	0.05129	0.00332	0.05264
13670	OX359191.1	6416134	0.22632	0.06274	0.28241	0.05433	0.23077	0.05619
13677	OX359191.1	6421767	0.03547	0.06280	0.03492	0.05430	0.04805	0.05618
13680	OX359191.1	6430787	0.01405	0.06290	0.01465	0.05477	0.01345	0.05674
13681	OX359191.1	6430790	-0.06798	0.06290	-0.02838	0.05477	-0.05150	0.05674
13689	OX359191.1	6437833	0.07935	0.06291	0.05775	0.05475	0.06360	0.05675
13706	OX359191.1	6454689	0.17078	0.06286	0.06649	0.05466	0.17647	0.05674
13708	OX359191.1	6454959	0.01597	0.06286	0.00963	0.05465	0.01428	0.05674
13709	OX359191.1	6462960	0.10807	0.06276	0.04217	0.05458	0.03547	0.05672
13728	OX359191.1	6495343	0.00370	0.06189	0.01872	0.05407	-0.02723	0.05634
13761	OX359191.1	6532621	0.24196	0.06039	0.25248	0.05381	0.25256	0.05621
13764	OX359191.1	6537157	-0.05814	0.06016	-0.06139	0.05381	-0.06209	0.05625
13801	OX359191.1	6634995	0.03336	0.05328	-0.00264	0.06084	-0.02593	0.06432
13802	OX359191.1	6634998	-0.03597	0.05328	-0.03660	0.06085	-0.01036	0.06432
13916	OX359191.1	6873976	0.17554	0.03647	0.66482	0.15125	0.66488	0.16253
13918	OX359191.1	6875915	-0.01496	0.03632	0.00393	0.15141	0.05368	0.16275
13932	OX359191.1	6894292	0.01597	0.03481	0.00963	0.15275	0.01428	0.16477
13975	OX359191.1	6996568	-0.08434	0.02242	-0.09142	0.12663	-0.11830	0.14621
14021	OX359191.1	7218962	0.04035	0.02397	0.11504	0.03746	0.29190	0.07870
14065	OX359191.1	7296643	0.02549	0.03141	0.01712	0.03199	0.07014	0.06173
14066	OX359191.1	7296947	-0.06207	0.03143	-0.06596	0.03197	-0.03383	0.06165
14078	OX359191.1	7321388	-0.03814	0.03232	-0.01220	0.03017	-0.00872	0.05564
14125	OX359191.1	7419600	0.40158	0.02752	0.32105	0.01810	0.31633	0.02853
14200	OX359191.1	7510231	-0.05814	0.01594	-0.06139	0.00298	-0.06209	0.00520
14212	OX359191.1	7523029	0.00041	0.01429	0.00423	0.00092	-0.00242	0.00242
14220	OX359191.1	7530727	-0.05814	0.01340	-0.06139	-0.00020	-0.06209	0.00091
14222	OX359191.1	7532220	-0.03554	0.01322	-0.03053	-0.00043	-0.02881	0.00061
14233	OX359191.1	7553172	-0.05692	0.01107	-0.04260	-0.00332	-0.04249	-0.00309
14244	OX359191.1	7561131	0.03612	0.01058	0.02862	-0.00408	0.02390	-0.00413
14286	OX359191.1	7665027	-0.04961	0.00741	-0.03115	-0.00961	-0.03321	-0.01055
14289	OX359191.1	7665338	0.04290	0.00743	-0.08081	-0.00960	-0.08434	-0.01054
14297	OX359191.1	7671275	0.05376	0.00788	0.00354	-0.00928	-0.02158	-0.01027
14321	OX359191.1	7710485	-0.01010	0.01157	-0.01065	-0.00572	-0.00787	-0.00577
14392	OX359191.1	7813588	0.03547	0.03595	0.03492	0.02054	0.04805	0.02484
14430	OX359191.1	7855230	-0.00322	0.04990	-0.00036	0.03587	0.00387	0.04203
14455	OX359191.1	7893712	-0.05994	0.06261	-0.06348	0.05002	-0.06007	0.05760
14480	OX359191.1	7934530	-0.02453	0.07440	-0.00133	0.06345	0.00691	0.07205
14516	OX359191.1	7975507	0.07935	0.08317	0.05775	0.07408	0.06360	0.08327
14531	OX359191.1	7996450	0.26146	0.08580	0.13302	0.07762	0.19469	0.08693
14545	OX359191.1	8009682	0.30135	0.08676	0.25556	0.07927	0.25018	0.08860
14570	OX359191.1	8042910	-0.05814	0.08655	-0.06139	0.08084	-0.06209	0.09005
14582	OX359191.1	8074419	0.43662	0.08327	0.53367	0.07906	0.55395	0.08796
14598	OX359191.1	8098844	-0.05387	0.07838	-0.05253	0.07494	-0.05381	0.08361
14607	OX359191.1	8121252	0.17977	0.07260	0.16739	0.06990	0.16335	0.07823
14626	OX359191.1	8156971	-0.02453	0.06036	-0.00133	0.05784	0.00691	0.06554
14655	OX359191.1	8190189	-0.08791	0.04689	-0.01619	0.04355	0.01791	0.05056
14669	OX359191.1	8219333	0.03378	0.03446	0.00205	0.02948	0.00942	0.03588
14697	OX359191.1	8287408	-0.05814	0.00950	-0.06139	-0.00246	-0.06209	0.00288
14743	OX359191.1	8349600	0.01152	-0.00228	-0.00498	-0.02242	0.00000	-0.01714
14755	OX359191.1	8367019	-0.03821	-0.00365	-0.03138	-0.02603	-0.04240	-0.02063
14759	OX359191.1	8383771	-0.03435	-0.00415	-0.00185	-0.02861	0.00662	-0.02303
14798	OX359191.1	8438261	-0.04538	-0.00128	-0.17699	-0.03147	-0.17925	-0.02505
14800	OX359191.1	8440012	-0.03279	-0.00108	-0.03457	-0.03143	-0.03496	-0.02497
14801	OX359191.1	8447130	-0.03279	-0.00040	-0.00747	-0.03126	-0.00996	-0.02471
14831	OX359191.1	8478806	-0.01600	0.00440	0.01124	-0.02859	0.00186	-0.02141
14835	OX359191.1	8492882	-0.03279	0.00711	-0.03457	-0.02653	-0.03496	-0.01907
14836	OX359191.1	8492885	-0.01915	0.00711	-0.03034	-0.02653	-0.03339	-0.01907
14848	OX359191.1	8518751	-0.05814	0.01267	-0.06139	-0.02161	-0.06209	-0.01370
14849	OX359191.1	8519124	0.14621	0.01275	0.01771	-0.02153	0.01266	-0.01361
14865	OX359191.1	8532317	-0.06780	0.01569	-0.07264	-0.01878	0.03445	-0.01066
14872	OX359191.1	8541951	-0.03142	0.01810	-0.33215	-0.01630	-0.31894	-0.00803
14890	OX359191.1	8572296	0.07017	0.02589	0.00418	-0.00768	0.02721	0.00095
14931	OX359191.1	8656252	0.08462	0.04594	0.08452	0.01857	0.08198	0.02730
14944	OX359191.1	8698871	0.15331	0.05289	0.12870	0.02975	0.13482	0.03808
14953	OX359191.1	8700880	0.21034	0.05312	0.21019	0.03018	0.21160	0.03848
14985	OX359191.1	8742089	-0.01247	0.05636	-0.01275	0.03704	0.08231	0.04481
14995	OX359191.1	8755275	-0.00297	0.05666	0.08159	0.03837	0.07913	0.04596
14996	OX359191.1	8755278	-0.05437	0.05666	-0.04282	0.03837	-0.03538	0.04596
15004	OX359191.1	8766393	0.28662	0.05667	0.17455	0.03919	0.18367	0.04662
15008	OX359191.1	8774728	0.27101	0.05653	0.26891	0.03963	0.24613	0.04695
15026	OX359191.1	8788964	0.13460	0.05622	0.09215	0.04022	0.08559	0.04735
15027	OX359191.1	8790027	-0.03279	0.05617	-0.01551	0.04024	-0.01286	0.04736
15030	OX359191.1	8795660	-0.05814	0.05584	-0.06139	0.04027	-0.06209	0.04734
15043	OX359191.1	8806273	-0.05387	0.05522	-0.05253	0.04028	-0.05381	0.04723
15083	OX359191.1	8946175	-0.05581	0.04184	-0.05756	0.03635	-0.05796	0.04253
15102	OX359191.1	8970533	0.18089	0.04100	0.02532	0.03829	0.02055	0.04443
15106	OX359191.1	8974589	-0.05936	0.04098	-0.04467	0.03873	-0.02672	0.04487
15128	OX359191.1	9042669	-0.05814	0.04591	-0.06139	0.05273	-0.06209	0.05855
15130	OX359191.1	9052435	-0.07623	0.04737	-0.08139	0.05550	-0.01202	0.06126
15138	OX359191.1	9090455	-0.05581	0.05444	-0.05756	0.06742	-0.05796	0.07293
15143	OX359191.1	9102690	-0.03941	0.05707	-0.03652	0.07147	-0.03872	0.07689
15154	OX359191.1	9132700	0.29851	0.06389	0.48526	0.08138	0.48780	0.08662
15172	OX359191.1	9145491	0.18959	0.06689	0.26891	0.08549	0.24613	0.09066
15221	OX359191.1	9235915	0.30135	0.08620	0.25556	0.10917	0.25018	0.11444
15222	OX359191.1	9241488	-0.02212	0.08732	-0.00127	0.11045	0.02957	0.11579
15232	OX359191.1	9258850	-0.00418	0.09065	-0.00343	0.11392	-0.03801	0.11946
15263	OX359191.1	9330229	0.10175	0.09939	0.02596	0.12192	0.08163	0.12872
15269	OX359191.1	9335359	0.12171	0.09984	0.25360	0.12228	0.24812	0.12920
15369	OX359192.1	195409	-0.05814	-0.02115	-0.06139	-0.03151	-0.06209	-0.01310
15414	OX359192.1	307846	0.01150	-0.02036	0.00129	-0.03068	0.01434	-0.00324
15430	OX359192.1	334179	0.04063	-0.02078	0.00235	-0.03095	-0.00283	-0.00158
15472	OX359192.1	402200	-0.01896	-0.02230	-0.00116	-0.03166	0.07045	0.00102
15476	OX359192.1	409224	-0.03365	-0.02245	-0.03405	-0.03172	-0.04017	0.00114
15477	OX359192.1	409227	-0.05994	-0.02245	-0.06348	-0.03172	-0.06007	0.00114
15498	OX359192.1	441496	-0.06119	-0.02294	-0.10009	-0.03174	0.09483	0.00129
15547	OX359192.1	592148	-0.01139	-0.01839	-0.00612	-0.02570	0.01199	-0.00645
15590	OX359192.1	676709	-0.05963	-0.00770	-0.05995	-0.01492	-0.05703	-0.00443
15600	OX359192.1	695505	0.01597	-0.00499	0.00963	-0.01225	0.01428	-0.00267
15621	OX359192.1	750982	0.02120	0.00475	-0.03963	-0.00245	-0.09204	0.00681
15648	OX359192.1	786818	-0.05387	0.01290	-0.05253	0.00606	-0.05381	0.01654
15666	OX359192.1	800573	-0.05166	0.01654	-0.02588	0.00989	-0.01533	0.02105
15682	OX359192.1	815022	0.07003	0.02066	0.07096	0.01428	0.07329	0.02626
15718	OX359192.1	875222	0.01150	0.04131	0.00129	0.03685	0.01434	0.05309
15747	OX359192.1	922256	-0.05814	0.05991	-0.06139	0.05789	-0.06209	0.07761
15751	OX359192.1	924213	0.05547	0.06070	0.01236	0.05880	0.09366	0.07868
15761	OX359192.1	938903	0.03017	0.06664	-0.01905	0.06563	-0.01204	0.08659
15795	OX359192.1	976909	-0.03458	0.08143	-0.03036	0.08290	0.06771	0.10661
15843	OX359192.1	1068066	0.49283	0.10321	0.63598	0.11032	0.63933	0.13950
15844	OX359192.1	1074797	0.61379	0.10360	0.60090	0.11103	0.60474	0.14055
15855	OX359192.1	1109145	-0.02148	0.10248	-0.01932	0.11123	-0.00716	0.14225
15860	OX359192.1	1117080	-0.05814	0.10148	-0.06139	0.11045	-0.06209	0.14176
15866	OX359192.1	1122668	0.03304	0.10060	0.02686	0.10971	0.07833	0.14122
15919	OX359192.1	1199415	-0.07463	0.07563	-0.08039	0.08482	0.09174	0.11675
15958	OX359192.1	1276236	-0.01496	0.03821	-0.00174	0.04479	0.06658	0.07183
15979	OX359192.1	1333325	-0.08434	0.01432	-0.09142	0.01758	-0.11830	0.03694
16000	OX359192.1	1357124	-0.03279	0.00715	-0.01551	0.00875	-0.01286	0.02433
16011	OX359192.1	1374391	0.01235	0.00324	0.00192	0.00362	-0.01108	0.01633
16046	OX359192.1	1467003	0.00494	0.00079	0.00333	-0.00582	-0.01443	-0.00570
16094	OX359192.1	1598424	-0.00563	0.02855	-0.00524	0.01715	-0.02960	0.01329
16095	OX359192.1	1598427	-0.07843	0.02855	-0.08410	0.01715	-0.12043	0.01329
16119	OX359192.1	1635429	-0.06166	0.03866	-0.06503	0.02800	-0.04055	0.02520
16123	OX359192.1	1640172	0.16227	0.03994	0.03985	0.02944	0.02460	0.02680
16132	OX359192.1	1649232	-0.02173	0.04236	-0.00633	0.03218	0.00000	0.02989
16170	OX359192.1	1726465	0.01945	0.05976	-0.00129	0.05378	0.01786	0.05492
16202	OX359192.1	1766832	0.35260	0.06491	0.36576	0.06133	0.34626	0.06486
16235	OX359192.1	1842110	0.20320	0.06320	0.32113	0.06249	0.33244	0.06988
16265	OX359192.1	1879774	0.03707	0.05836	-0.02568	0.05722	0.00589	0.06633
16306	OX359192.1	1961649	-0.05814	0.04857	-0.06139	0.04323	-0.06209	0.05569
16315	OX359192.1	1977589	-0.01592	0.04773	0.00244	0.04109	-0.01726	0.05419
16316	OX359192.1	1977931	-0.02674	0.04772	-0.02406	0.04105	0.03746	0.05416
16348	OX359192.1	2038431	-0.01580	0.05107	-0.00031	0.03826	-0.00167	0.05402
16351	OX359192.1	2042972	0.08508	0.05164	0.01032	0.03833	0.00214	0.05431
16374	OX359192.1	2078380	-0.01134	0.05765	-0.00720	0.04014	-0.00328	0.05782
16419	OX359192.1	2184915	-0.05434	0.08044	-0.14732	0.05036	-0.02151	0.07079
16431	OX359192.1	2192336	0.57361	0.08173	0.59120	0.05090	0.60792	0.07127
16434	OX359192.1	2196093	0.01150	0.08235	0.00129	0.05115	0.01434	0.07148
16485	OX359192.1	2290571	0.00826	0.09083	0.00104	0.05319	-0.01506	0.06975
16489	OX359192.1	2293420	0.19296	0.09080	0.02588	0.05292	0.05797	0.06931
16522	OX359192.1	2329388	-0.02674	0.09194	-0.02406	0.05330	0.03746	0.06737
16557	OX359192.1	2411389	0.10133	0.09312	0.07988	0.05511	0.10314	0.06400
16562	OX359192.1	2420056	-0.05936	0.09336	-0.04467	0.05554	-0.02672	0.06393
16563	OX359192.1	2420059	0.05376	0.09336	0.00354	0.05554	-0.02158	0.06393
16573	OX359192.1	2446186	0.01405	0.09463	0.01465	0.05769	0.01345	0.06457
16587	OX359192.1	2453326	0.40594	0.09499	0.31298	0.05840	0.31535	0.06487
16588	OX359192.1	2454775	0.19822	0.09507	0.03664	0.05855	-0.01401	0.06495
16592	OX359192.1	2457775	0.15331	0.09524	0.12870	0.05887	0.13482	0.06510
16594	OX359192.1	2462639	0.01595	0.09553	0.00927	0.05944	0.02396	0.06539
16611	OX359192.1	2483017	-0.00202	0.09687	-0.00102	0.06219	-0.00545	0.06703
16622	OX359192.1	2504349	0.10537	0.09894	0.01452	0.06618	0.02307	0.06977
16645	OX359192.1	2540457	0.08825	0.10308	0.06054	0.07495	0.08069	0.07605
16729	OX359192.1	2756589	0.62617	0.12007	0.75546	0.14267	0.68251	0.12609
16758	OX359192.1	2795739	-0.05581	0.11305	-0.05756	0.13441	-0.05796	0.11852
16786	OX359192.1	2831940	-0.02488	0.10545	0.27706	0.12247	0.23077	0.10827
16789	OX359192.1	2833217	0.50854	0.10518	0.64731	0.12201	0.49933	0.10788
16803	OX359192.1	2847490	-0.02453	0.10220	-0.00133	0.11673	0.00691	0.10344
16814	OX359192.1	2864187	-0.04187	0.09881	-0.09771	0.11043	-0.09929	0.09814
16830	OX359192.1	2895247	0.30135	0.09310	0.25556	0.09873	0.25018	0.08846
16844	OX359192.1	2925694	-0.05321	0.08792	-0.04391	0.08750	0.02827	0.07920
16861	OX359192.1	2955757	-0.03279	0.08398	-0.03457	0.07743	-0.03496	0.07099
16872	OX359192.1	2962706	-0.06064	0.08318	-0.23694	0.07521	-0.24309	0.06919
16907	OX359192.1	3011816	0.07017	0.07887	0.00418	0.06144	0.02721	0.05805
16918	OX359192.1	3033053	0.13460	0.07774	0.09215	0.05656	0.08559	0.05414
16935	OX359192.1	3057571	0.13460	0.07695	0.09215	0.05176	0.08559	0.05032
17070	OX359192.1	3587909	-0.05461	-0.05461	-0.05750	-0.05750	0.00374	0.00374
17172	OX359192.1	4553577	-0.05767	-0.02488	-0.02115	-0.00243	-0.01506	-0.00334
17250	OX359192.1	4799757	-0.05499	0.01397	-0.00699	0.02333	-0.03022	0.01863
17251	OX359192.1	4801541	-0.03279	0.01413	-0.03457	0.02341	-0.03496	0.01873
17257	OX359192.1	4806099	-0.05814	0.01453	-0.06139	0.02361	-0.06209	0.01896
17274	OX359192.1	4835682	0.01597	0.01691	0.00963	0.02464	0.01428	0.02027
17285	OX359192.1	4847085	0.07336	0.01764	0.06529	0.02458	0.05516	0.02041
17298	OX359192.1	4857285	-0.03340	0.01832	-0.03571	0.02469	-0.05229	0.02069
17301	OX359192.1	4861399	0.20906	0.01858	0.27370	0.02471	0.27410	0.02079
17368	OX359192.1	5001218	0.00277	0.02397	0.00040	0.01990	-0.02326	0.02034
17379	OX359192.1	5020439	-0.00322	0.02424	-0.00036	0.01868	0.00332	0.01988
17402	OX359192.1	5058849	-0.05166	0.02430	-0.05627	0.01604	-0.04275	0.01878
17420	OX359192.1	5071213	-0.05581	0.02412	-0.05756	0.01507	-0.05796	0.01826
17425	OX359192.1	5075097	0.20792	0.02408	0.11602	0.01478	0.09405	0.01811
17462	OX359192.1	5136523	-0.01496	0.02272	-0.00174	0.00996	0.06658	0.01541
17482	OX359192.1	5170437	0.13460	0.02136	0.09215	0.00703	0.08559	0.01340
17506	OX359192.1	5205298	0.14837	0.01953	0.15497	0.00387	0.15638	0.01112
17508	OX359192.1	5209552	-0.04961	0.01928	-0.03115	0.00348	-0.03321	0.01083
17511	OX359192.1	5212413	-0.07790	0.01912	-0.01609	0.00322	-0.01894	0.01064
17547	OX359192.1	5293136	-0.07517	0.01427	-0.28426	-0.00359	-0.23047	0.00596
17556	OX359192.1	5311838	0.13460	0.01303	0.09215	-0.00510	0.08559	0.00512
17558	OX359192.1	5317311	-0.05581	0.01277	-0.05756	-0.00539	-0.05796	0.00502
17599	OX359192.1	5375365	-0.05890	0.01032	-0.01006	-0.00756	-0.00531	0.00550
17623	OX359192.1	5414422	0.05338	0.00954	0.00993	-0.00781	0.00332	0.00757
17624	OX359192.1	5414425	0.01848	0.00954	0.00221	-0.00781	0.04215	0.00757
17627	OX359192.1	5417947	-0.00322	0.00949	-0.00036	-0.00780	0.00387	0.00780
17645	OX359192.1	5459076	0.00277	0.00931	0.00040	-0.00735	-0.02262	0.01114
17673	OX359192.1	5510370	-0.05814	0.00921	-0.06139	-0.00651	-0.06209	0.01533
17700	OX359192.1	5544644	0.01597	0.00876	0.00963	-0.00621	0.01428	0.01742
17713	OX359192.1	5573380	-0.07843	0.00818	-0.08410	-0.00613	-0.02107	0.01849
17725	OX359192.1	5585667	0.20270	0.00783	0.08629	-0.00618	0.29056	0.01874
17726	OX359192.1	5585670	0.05882	0.00783	0.06207	-0.00618	0.04580	0.01874
17737	OX359192.1	5628135	-0.02212	0.00642	-0.00127	-0.00650	0.02957	0.01868
17750	OX359192.1	5650495	0.01848	0.00552	0.00221	-0.00678	0.04215	0.01817
17778	OX359192.1	5694609	0.06987	0.00367	-0.00115	-0.00743	-0.01657	0.01650
17790	OX359192.1	5711762	0.05376	0.00303	0.00354	-0.00762	-0.01687	0.01575
17804	OX359192.1	5726275	-0.02457	0.00255	-0.02193	-0.00775	-0.02477	0.01511
17811	OX359192.1	5730010	-0.01496	0.00244	-0.00174	-0.00777	0.06658	0.01495
17818	OX359192.1	5730561	-0.07143	0.00243	-0.07656	-0.00778	0.01079	0.01493
17852	OX359192.1	5786896	-0.04749	0.00159	-0.02185	-0.00769	-0.07543	0.01291
17864	OX359192.1	5802193	-0.03279	0.00169	-0.03457	-0.00752	-0.03496	0.01250
17866	OX359192.1	5803949	-0.05692	0.00171	-0.04260	-0.00750	-0.04249	0.01246
17867	OX359192.1	5803952	-0.01468	0.00171	-0.00097	-0.00750	0.08431	0.01246
17879	OX359192.1	5818964	-0.05692	0.00198	-0.04260	-0.00724	-0.04249	0.01215
17903	OX359192.1	5842421	-0.07143	0.00276	-0.07656	-0.00667	-0.09272	0.01188
17907	OX359192.1	5850070	0.14837	0.00308	0.15497	-0.00644	0.15638	0.01184
17931	OX359192.1	5893407	0.12226	0.00568	0.03365	-0.00474	0.14163	0.01203
17957	OX359192.1	5928606	-0.05814	0.00876	-0.06139	-0.00285	-0.06209	0.01271
17989	OX359192.1	5993463	-0.05880	0.01640	-0.05323	0.00188	-0.05287	0.01502
18012	OX359192.1	6040574	0.03612	0.02259	0.02862	0.00587	0.02390	0.01693
18014	OX359192.1	6041769	0.21074	0.02276	0.11430	0.00598	0.12366	0.01700
18072	OX359192.1	6131625	0.00592	0.03632	0.00063	0.01586	0.00332	0.02342
18183	OX359192.1	6411875	0.19077	0.04310	0.14941	0.02217	0.12975	0.02310
18204	OX359192.1	6453534	0.01848	0.03522	0.00221	0.01523	0.04215	0.01523
18279	OX359192.1	6599289	-0.05461	0.02390	-0.05750	0.00635	-0.07044	0.00424
18314	OX359192.1	6638768	-0.03435	0.02431	-0.00185	0.00743	0.00662	0.00520
18321	OX359192.1	6645961	-0.04187	0.02447	-0.09771	0.00772	-0.09929	0.00550
18327	OX359192.1	6654426	-0.00322	0.02469	-0.00036	0.00811	0.00387	0.00589
18335	OX359192.1	6660746	0.03612	0.02486	0.02862	0.00842	0.02390	0.00622
18341	OX359192.1	6663611	0.04566	0.02495	0.04218	0.00857	0.04754	0.00637
18344	OX359192.1	6667259	-0.00362	0.02506	-0.11701	0.00876	-0.12016	0.00657
18349	OX359192.1	6671513	0.11194	0.02519	0.07959	0.00899	0.06275	0.00682
18350	OX359192.1	6671516	0.01560	0.02519	0.01286	0.00899	0.00354	0.00682
18355	OX359192.1	6674479	0.01560	0.02528	0.01286	0.00915	0.00354	0.00700
18371	OX359192.1	6706253	-0.04888	0.02628	-0.03993	0.01101	-0.07271	0.00906
18389	OX359192.1	6718817	0.05653	0.02672	0.05771	0.01184	0.05571	0.01000
18416	OX359192.1	6755359	0.03547	0.02788	0.03492	0.01436	0.04805	0.01298
18421	OX359192.1	6762253	0.21250	0.02807	0.10203	0.01484	0.11067	0.01357
18443	OX359192.1	6796535	-0.05581	0.02878	-0.05756	0.01711	-0.05796	0.01649
18462	OX359192.1	6827521	0.15331	0.02899	0.12870	0.01891	0.13482	0.01903
18466	OX359192.1	6829998	-0.03279	0.02898	-0.01551	0.01903	-0.01286	0.01922
18491	OX359192.1	6861177	0.03945	0.02851	0.10486	0.02026	0.08069	0.02135
18518	OX359192.1	6948393	-0.04334	0.02364	-0.00560	0.01871	0.04526	0.02294
18532	OX359192.1	6956483	0.01597	0.02299	0.00963	0.01810	0.01428	0.02265
18640	OX359192.1	7129703	-0.05614	0.02110	-0.08571	0.00052	-0.08571	0.00974
18642	OX359192.1	7133179	0.01597	0.02151	0.00963	0.00044	0.01428	0.00968
18680	OX359192.1	7224937	0.00914	0.03628	-0.00348	0.00493	-0.00624	0.01451
18683	OX359192.1	7225365	0.07017	0.03636	0.00418	0.00498	0.02721	0.01456
18710	OX359192.1	7272465	0.10223	0.04576	0.05361	0.01159	0.07324	0.02101
18750	OX359192.1	7388572	0.11486	0.06276	0.01596	0.02938	0.03537	0.03739
18768	OX359192.1	7421083	0.00592	0.06429	0.00063	0.03265	0.00332	0.04004
18808	OX359192.1	7517086	-0.03279	0.05943	-0.01551	0.03213	-0.01286	0.03957
18812	OX359192.1	7520165	0.30135	0.05914	0.25556	0.03189	0.25018	0.03938
18868	OX359192.1	7642179	-0.05994	0.04958	-0.06348	0.02066	-0.06007	0.03140
18876	OX359192.1	7658958	-0.04961	0.04906	-0.03115	0.01978	-0.03321	0.03102
18926	OX359192.1	7732385	0.13625	0.04862	0.01722	0.01863	0.00387	0.03136
18929	OX359192.1	7737743	-0.05692	0.04873	-0.04260	0.01868	-0.04249	0.03146
18948	OX359192.1	7764505	0.13253	0.04876	0.04183	0.01950	0.06185	0.03254
18949	OX359192.1	7764508	0.09353	0.04876	0.02022	0.01950	0.18655	0.03254
18975	OX359192.1	7824658	0.13625	0.04811	0.01722	0.02173	0.00387	0.03497
18990	OX359192.1	7850002	0.13125	0.04726	0.11102	0.02278	0.06962	0.03598
19002	OX359192.1	7859445	-0.03435	0.04686	-0.00185	0.02322	0.00662	0.03637
19005	OX359192.1	7861128	0.01405	0.04679	0.01465	0.02329	0.01345	0.03644
19019	OX359192.1	7874120	0.09945	0.04620	0.08546	0.02392	0.07861	0.03701
19020	OX359192.1	7874123	0.01597	0.04620	0.06253	0.02392	0.06061	0.03701
19024	OX359192.1	7875669	0.08587	0.04612	0.00622	0.02399	0.01255	0.03707
19041	OX359192.1	7937426	0.06583	0.04189	0.03839	0.02758	0.18112	0.04007
19060	OX359192.1	7975349	-0.08108	0.03869	-0.08738	0.03093	-0.12611	0.04282
19088	OX359192.1	8047174	0.00189	0.03432	0.00022	0.04229	-0.01331	0.05222
19110	OX359192.1	8084603	-0.01818	0.03311	-0.02689	0.05006	-0.02837	0.05864
19113	OX359192.1	8096285	0.01531	0.03299	0.04048	0.05270	0.08217	0.06083
19142	OX359192.1	8182915	0.13625	0.03166	0.01722	0.06624	0.00387	0.07100
19150	OX359192.1	8200956	0.01399	0.03127	0.34605	0.06705	0.35583	0.07119
19170	OX359192.1	8219596	0.09189	0.03043	0.17601	0.06669	0.18033	0.07015
19218	OX359192.1	8304811	0.03309	0.02366	0.05278	0.05224	0.04505	0.05428
19237	OX359192.1	8332624	-0.05814	0.02063	-0.06139	0.04457	-0.06209	0.04646
19278	OX359192.1	8401956	-0.01134	0.01338	-0.00720	0.02492	-0.00328	0.02699
19301	OX359192.1	8428354	0.15331	0.01126	0.12870	0.01869	0.13482	0.02114
19328	OX359192.1	8479757	-0.08108	0.00833	-0.08012	0.00938	-0.08386	0.01254
19335	OX359192.1	8490129	-0.05814	0.00797	-0.06139	0.00800	-0.06209	0.01131
19359	OX359192.1	8525723	0.02195	0.00731	0.00379	0.00439	0.00000	0.00820
19386	OX359192.1	8577041	-0.03279	0.00766	-0.01551	0.00171	-0.01286	0.00605
19392	OX359192.1	8584498	-0.03279	0.00781	-0.01551	0.00152	-0.01286	0.00592
19404	OX359192.1	8605921	0.07003	0.00836	0.07096	0.00116	0.07329	0.00571
19409	OX359192.1	8627820	-0.06485	0.00908	-0.06870	0.00107	-0.04446	0.00571
19433	OX359192.1	8655851	0.09661	0.01009	0.00664	0.00090	0.06323	0.00557
19447	OX359192.1	8692064	0.17977	0.01170	0.16739	0.00160	0.16335	0.00614
19451	OX359192.1	8700865	-0.08434	0.01214	-0.09142	0.00186	-0.12920	0.00634
19453	OX359192.1	8701310	-0.05814	0.01216	-0.06139	0.00187	-0.06209	0.00635
19531	OX359192.1	8929562	0.03612	0.02510	0.02862	0.01394	0.02390	0.01322
19597	OX359193.1	206346	0.00431	0.07269	0.03318	0.08591	0.01088	0.09158
19603	OX359193.1	218032	0.03612	0.07371	0.02862	0.08627	0.02390	0.09190
19604	OX359193.1	218995	-0.02154	0.07379	0.00019	0.08630	0.04857	0.09193
19629	OX359193.1	260588	0.23592	0.07783	0.21946	0.08795	0.22495	0.09348
19636	OX359193.1	275247	0.01123	0.07943	0.00247	0.08874	-0.02947	0.09426
19638	OX359193.1	275623	-0.04502	0.07947	-0.00254	0.08876	0.07407	0.09428
19641	OX359193.1	279966	0.25091	0.07996	0.41787	0.08903	0.41379	0.09454
19659	OX359193.1	328286	0.17977	0.08613	0.16739	0.09307	0.16335	0.09859
19661	OX359193.1	331713	-0.06128	0.08662	-0.05696	0.09344	-0.06838	0.09898
19668	OX359193.1	358363	0.00505	0.09062	0.00515	0.09687	0.00354	0.10248
19681	OX359193.1	385520	0.03612	0.09510	0.02862	0.10133	0.02390	0.10707
19696	OX359193.1	408450	-0.05814	0.09913	-0.06139	0.10591	-0.06209	0.11181
19707	OX359193.1	438247	0.36364	0.10441	0.26519	0.11272	0.27386	0.11887
19719	OX359193.1	447141	0.16279	0.10604	0.05938	0.11500	0.09579	0.12124
19721	OX359193.1	448591	-0.03279	0.10630	-0.07085	0.11538	-0.06838	0.12164
19730	OX359193.1	466534	0.10048	0.10944	0.06667	0.12001	0.06275	0.12649
19734	OX359193.1	468506	0.03486	0.10979	0.02233	0.12056	0.04341	0.12706
19765	OX359193.1	539250	0.52703	0.12011	0.48410	0.13989	0.48980	0.14730
19787	OX359193.1	577836	0.15166	0.12184	0.48962	0.14697	0.48646	0.15480
19807	OX359193.1	598406	0.00592	0.12175	0.00063	0.14980	0.00332	0.15778
19813	OX359193.1	610756	0.15524	0.12083	0.34652	0.15020	0.38575	0.15822
19826	OX359193.1	635552	0.06479	0.11740	0.03660	0.14869	0.04610	0.15675
19920	OX359193.1	834457	0.13460	0.04367	0.09215	0.05880	0.08559	0.06142
19928	OX359193.1	863665	-0.05632	0.03923	-0.08571	0.05405	-0.08571	0.05580
19950	OX359193.1	900497	0.08762	0.03645	0.01087	0.05213	-0.00086	0.05293
19960	OX359193.1	912071	-0.03445	0.03642	-0.10723	0.05228	-0.02928	0.05286
20007	OX359193.1	957098	-0.05764	0.03725	-0.01996	0.05424	-0.01980	0.05411
20009	OX359193.1	957106	-0.06751	0.03725	-0.03020	0.05424	-0.05315	0.05411
20036	OX359193.1	990804	-0.04072	0.03838	-0.07311	0.05573	-0.07282	0.05526
20049	OX359193.1	1010151	-0.04525	0.03939	0.07249	0.05663	0.05063	0.05604
20058	OX359193.1	1021018	0.07003	0.03993	0.07096	0.05699	0.07329	0.05636
20059	OX359193.1	1021021	-0.05814	0.03993	-0.06139	0.05699	-0.06209	0.05636
20062	OX359193.1	1026147	-0.00202	0.04018	-0.00102	0.05713	-0.00545	0.05648
20071	OX359193.1	1040591	0.01731	0.04077	0.48165	0.05714	0.49298	0.05646
20078	OX359193.1	1047285	0.74576	0.04105	0.75780	0.05719	0.71826	0.05651
20084	OX359193.1	1054359	0.06250	0.04135	0.06571	0.05723	0.03561	0.05655
20105	OX359193.1	1086595	0.03612	0.04225	0.02862	0.05634	0.02390	0.05572
20132	OX359193.1	1110303	-0.05674	0.04261	-0.15977	0.05495	-0.14458	0.05445
20135	OX359193.1	1111253	-0.05994	0.04262	-0.06348	0.05488	-0.06007	0.05439
20154	OX359193.1	1129776	0.19454	0.04270	0.13545	0.05332	0.16435	0.05296
20159	OX359193.1	1141108	0.03612	0.04265	0.02862	0.05218	0.02390	0.05191
20171	OX359193.1	1158580	0.09661	0.04257	0.00664	0.05031	0.00188	0.05018
20194	OX359193.1	1203218	-0.05387	0.04182	-0.05253	0.04459	-0.05381	0.04486
20232	OX359193.1	1263133	-0.03554	0.04075	-0.03053	0.03684	-0.02881	0.03745
20249	OX359193.1	1294924	-0.01033	0.04080	-0.00128	0.03410	0.01927	0.03467
20267	OX359193.1	1319888	-0.03279	0.04143	-0.00747	0.03338	-0.00996	0.03382
20307	OX359193.1	1360506	0.21250	0.04334	0.10203	0.03511	0.11067	0.03511
20331	OX359193.1	1436515	0.04628	0.04839	0.01135	0.04846	-0.02205	0.04764
20405	OX359193.1	1557705	-0.00256	0.04713	-0.00156	0.07004	-0.03448	0.07037
20443	OX359193.1	1603741	0.17104	0.04480	0.20451	0.07313	0.20635	0.07405
20452	OX359193.1	1615477	0.07017	0.04420	0.00418	0.07350	0.02721	0.07453
20464	OX359193.1	1632724	-0.03464	0.04331	0.01223	0.07366	0.01278	0.07479
20470	OX359193.1	1642512	0.16639	0.04299	0.39003	0.07375	0.39282	0.07491
20495	OX359193.1	1677458	-0.02002	0.04255	-0.00492	0.07413	0.02055	0.07519
20506	OX359193.1	1698541	-0.04012	0.04289	-0.00962	0.07447	-0.01331	0.07533
20552	OX359193.1	1758629	0.12916	0.04753	0.15749	0.07776	0.15796	0.07742
20559	OX359193.1	1768522	-0.02453	0.04883	-0.00133	0.07870	0.00691	0.07810
20560	OX359193.1	1768525	-0.05814	0.04883	-0.06139	0.07870	-0.06209	0.07810
20562	OX359193.1	1769173	-0.04762	0.04892	-0.01207	0.07877	0.00131	0.07815
20623	OX359193.1	1882965	0.16256	0.07159	0.16206	0.09751	0.08614	0.09405
20649	OX359193.1	1930427	0.13125	0.08009	0.11102	0.10564	0.06962	0.10184
20652	OX359193.1	1938065	0.10713	0.08098	0.15902	0.10651	0.16149	0.10274
20689	OX359193.1	1993820	0.38948	0.08415	0.39402	0.11021	0.42529	0.10705
20715	OX359193.1	2023378	0.14837	0.08263	0.15497	0.10925	0.15638	0.10669
20746	OX359193.1	2076538	-0.03435	0.07510	-0.00185	0.10212	0.00662	0.10077
20747	OX359193.1	2076541	-0.05814	0.07510	-0.06139	0.10212	-0.06209	0.10077
20749	OX359193.1	2077129	0.04654	0.07499	0.16677	0.10201	0.16378	0.10067
20837	OX359193.1	2237470	-0.04605	0.05449	-0.00491	0.06241	-0.00617	0.06356
20921	OX359193.1	2369211	0.01597	0.07230	0.00963	0.05380	0.01428	0.05572
20938	OX359193.1	2382234	0.01582	0.07419	-0.00304	0.05414	0.00168	0.05615
20943	OX359193.1	2399177	0.28082	0.07649	0.16208	0.05466	0.15395	0.05671
20986	OX359193.1	2488898	-0.01113	0.08458	0.02890	0.05904	0.04762	0.06097
21001	OX359193.1	2516735	0.17977	0.08639	0.16739	0.06100	0.16335	0.06273
21030	OX359193.1	2566983	0.12583	0.09058	0.01665	0.06628	0.01020	0.06725
21041	OX359193.1	2575542	0.04063	0.09134	0.00235	0.06734	-0.00283	0.06814
21075	OX359193.1	2633964	-0.02212	0.09863	-0.00127	0.07670	0.02957	0.07586
21132	OX359193.1	2733887	0.07003	0.11943	0.07096	0.09919	0.07329	0.09474
21142	OX359193.1	2754418	0.19708	0.12432	0.20218	0.10396	0.18050	0.09886
21183	OX359193.1	2798006	0.13460	0.13455	0.09215	0.11342	0.08559	0.10724
21184	OX359193.1	2798009	0.21569	0.13455	0.22222	0.11342	0.18387	0.10724
21265	OX359193.1	2920105	0.00592	0.15706	0.00063	0.13301	0.00332	0.12623
21270	OX359193.1	2922723	0.28082	0.15742	0.16208	0.13333	0.15395	0.12656
21301	OX359193.1	2987619	0.24196	0.16507	0.25248	0.14059	0.25256	0.13440
21302	OX359193.1	2996075	0.15111	0.16587	0.14448	0.14145	0.13640	0.13536
21407	OX359193.1	3498053	-0.06749	-0.02922	-0.06202	-0.02704	0.04652	0.00373
21426	OX359193.1	3571294	-0.06225	-0.02442	-0.04922	-0.02298	-0.07887	0.00259
21443	OX359193.1	3627636	0.02697	-0.02190	0.02809	-0.02089	0.05128	0.00118
21449	OX359193.1	3636328	-0.03279	-0.02159	-0.03457	-0.02064	-0.03496	0.00093
21462	OX359193.1	3684329	0.02740	-0.02004	0.00351	-0.01932	0.08907	-0.00047
21499	OX359193.1	3750152	-0.02002	-0.01762	-0.00492	-0.01724	0.02055	-0.00195
21539	OX359193.1	3808052	-0.04961	-0.01446	-0.03115	-0.01453	-0.03321	-0.00176
21550	OX359193.1	3817610	-0.05814	-0.01382	-0.06139	-0.01399	-0.06209	-0.00157
21568	OX359193.1	3849765	0.01639	-0.01144	0.00222	-0.01194	0.00280	-0.00054
21569	OX359193.1	3849768	-0.05963	-0.01144	-0.05995	-0.01194	-0.05703	-0.00054
21652	OX359193.1	3964438	-0.02427	-0.00288	-0.00170	-0.00475	-0.00183	0.00532
21668	OX359193.1	3979345	0.01560	-0.00209	0.01286	-0.00410	0.00354	0.00609
21672	OX359193.1	3989367	0.14837	-0.00162	0.15497	-0.00372	0.15638	0.00659
21673	OX359193.1	3989370	-0.01496	-0.00162	-0.00174	-0.00372	0.06658	0.00659
21687	OX359193.1	4003597	-0.05603	-0.00074	-0.12237	-0.00290	-0.10365	0.00761
21719	OX359193.1	4040846	0.03378	0.00054	0.00205	-0.00181	0.00942	0.00947
21730	OX359193.1	4049362	-0.03067	0.00074	-0.00186	-0.00164	-0.01977	0.00985
21786	OX359193.1	4140910	-0.02457	0.00229	-0.02193	-0.00016	-0.02477	0.01369
21805	OX359193.1	4181443	-0.00322	0.00363	-0.00036	0.00113	0.00387	0.01569
21861	OX359193.1	4257418	-0.06217	0.00843	-0.04913	0.00588	0.11678	0.02009
21881	OX359193.1	4298864	0.03252	0.01299	0.03362	0.01036	0.04207	0.02353
21902	OX359193.1	4325018	-0.05644	0.01632	-0.03731	0.01371	-0.03743	0.02606
21905	OX359193.1	4325750	0.01597	0.01641	0.00963	0.01381	0.01428	0.02612
21907	OX359193.1	4327084	0.04063	0.01657	0.00235	0.01398	-0.00283	0.02625
21927	OX359193.1	4348880	0.00592	0.01946	0.00063	0.01690	0.00332	0.02838
21930	OX359193.1	4352021	-0.04816	0.01990	-0.04197	0.01735	-0.02954	0.02871
21941	OX359193.1	4380012	0.03378	0.02410	0.00205	0.02161	0.00168	0.03195
21951	OX359193.1	4397158	-0.00322	0.02709	-0.00036	0.02457	0.00387	0.03422
21952	OX359193.1	4397161	0.04063	0.02709	0.00235	0.02457	-0.00283	0.03422
21993	OX359193.1	4447154	0.25379	0.03778	0.30241	0.03467	0.30755	0.04278
22058	OX359193.1	4540406	0.00592	0.06901	0.00063	0.06193	0.00332	0.06889
22061	OX359193.1	4541157	-0.03435	0.06932	-0.00185	0.06219	0.00662	0.06916
22131	OX359193.1	4700834	0.06769	0.11442	0.02461	0.09724	0.00214	0.11531
22137	OX359193.1	4708960	0.13625	0.11459	0.01722	0.09738	0.00387	0.11610
22147	OX359193.1	4714956	0.39612	0.11446	0.41418	0.09728	0.40805	0.11658
22171	OX359193.1	4772218	0.40437	0.10847	0.39157	0.09310	0.41070	0.11716
22204	OX359193.1	4810531	-0.02906	0.10161	-0.00786	0.08853	0.05476	0.11496
22227	OX359193.1	4837499	0.12208	0.09589	0.07334	0.08474	0.04748	0.11238
22237	OX359193.1	4849817	-0.05529	0.09333	-0.08228	0.08310	-0.08043	0.11121
22246	OX359193.1	4855367	0.04685	0.09212	0.12136	0.08230	0.35275	0.11058
22261	OX359193.1	4868927	-0.07463	0.08921	-0.08039	0.08040	-0.11046	0.10905
22262	OX359193.1	4868930	-0.07463	0.08921	-0.06329	0.08040	-0.09186	0.10905
22266	OX359193.1	4871511	0.26241	0.08867	0.04017	0.08005	0.17460	0.10876
22289	OX359193.1	4895759	0.32625	0.08353	0.32442	0.07668	0.32862	0.10585
22320	OX359193.1	4957823	-0.02212	0.07221	-0.00127	0.06941	0.02957	0.09908
22325	OX359193.1	4965363	-0.02566	0.07106	-0.08816	0.06866	-0.08371	0.09835
22331	OX359193.1	4972236	0.07370	0.06997	0.49967	0.06793	0.50625	0.09759
22340	OX359193.1	4984021	0.18089	0.06831	0.02532	0.06682	0.02055	0.09647
22365	OX359193.1	5008961	-0.03458	0.06522	-0.03036	0.06472	0.06771	0.09434
22374	OX359193.1	5017351	-0.03274	0.06424	-0.00187	0.06402	-0.01361	0.09361
22401	OX359193.1	5051313	-0.03010	0.06048	-0.01831	0.06111	-0.00134	0.09048
22443	OX359193.1	5113343	0.03612	0.05474	0.02862	0.05664	0.02390	0.08518
22459	OX359193.1	5126181	0.00189	0.05338	0.00022	0.05562	-0.01331	0.08385
22465	OX359193.1	5132838	0.32482	0.05255	0.23519	0.05501	0.39082	0.08301
22579	OX359193.1	5321585	-0.05994	0.01856	-0.06348	0.04139	-0.06007	0.05404
22620	OX359193.1	5382582	-0.01436	0.01610	0.11282	0.04336	0.11402	0.05239
22632	OX359193.1	5401364	-0.04368	0.01681	-0.00262	0.04456	0.00948	0.05290
22644	OX359193.1	5417677	-0.05996	0.01776	-0.05708	0.04569	-0.08696	0.05344
22670	OX359193.1	5467568	-0.05814	0.02132	-0.06139	0.04788	-0.06209	0.05447
22703	OX359193.1	5495787	0.03486	0.02334	0.02233	0.04827	0.04341	0.05435
22715	OX359193.1	5528699	0.30603	0.02613	0.51222	0.04818	0.51235	0.05352
22716	OX359193.1	5528991	0.12583	0.02615	0.01665	0.04817	0.01020	0.05350
22721	OX359193.1	5538899	-0.04502	0.02674	-0.00254	0.04778	0.07407	0.05286
22732	OX359193.1	5580856	-0.03067	0.02845	-0.00186	0.04469	-0.01977	0.04852
22766	OX359193.1	5632348	-0.05387	0.02976	-0.05253	0.03903	-0.05381	0.04065
22824	OX359193.1	5727989	-0.05867	0.03511	-0.04283	0.03205	-0.05485	0.02932
22827	OX359193.1	5732221	0.18089	0.03554	0.02532	0.03206	0.00698	0.02916
22863	OX359193.1	5766760	-0.02795	0.03967	-0.00182	0.03344	-0.00773	0.02945
22868	OX359193.1	5771803	-0.03756	0.04048	-0.02150	0.03393	-0.00465	0.02982
22914	OX359193.1	5854424	-0.03554	0.05323	-0.03053	0.04457	-0.02881	0.03980
22915	OX359193.1	5854830	0.04829	0.05329	0.04236	0.04463	-0.01540	0.03986
22978	OX359193.1	5955864	0.10695	0.06387	0.10921	0.05783	0.11678	0.05442
22992	OX359193.1	5965688	-0.02457	0.06430	-0.02193	0.05861	-0.02477	0.05538
22994	OX359193.1	5968517	0.72240	0.06442	0.56543	0.05883	0.52644	0.05565
23018	OX359193.1	5992615	0.01692	0.06497	0.04948	0.06015	0.07881	0.05729
23024	OX359193.1	6006451	-0.05347	0.06506	-0.03874	0.06079	-0.03743	0.05817
23025	OX359193.1	6006454	0.00802	0.06506	0.00762	0.06079	0.01011	0.05817
23027	OX359193.1	6008202	0.00189	0.06507	0.00022	0.06087	-0.01331	0.05827
23038	OX359193.1	6021740	-0.04762	0.06490	-0.01207	0.06120	0.00131	0.05886
23095	OX359193.1	6161821	0.09483	0.05419	0.16336	0.05250	0.15966	0.05238
23140	OX359193.1	6223791	0.05382	0.04605	-0.00129	0.04174	-0.01955	0.04338
23172	OX359193.1	6285832	0.11262	0.03992	0.11659	0.03115	0.12713	0.03507
23182	OX359193.1	6317009	-0.05814	0.03834	-0.06139	0.02731	-0.06209	0.03250
23212	OX359193.1	6381867	0.04063	0.03872	0.00235	0.02339	-0.00283	0.03102
23222	OX359193.1	6409536	0.01595	0.03998	-0.00192	0.02290	0.00488	0.03152
23256	OX359193.1	6446729	-0.01010	0.04241	-0.01065	0.02305	-0.00787	0.03298
23276	OX359193.1	6470191	-0.03605	0.04461	-0.06310	0.02375	-0.02433	0.03452
23281	OX359193.1	6475141	0.09692	0.04512	0.08567	0.02391	0.13703	0.03484
23297	OX359193.1	6496935	0.07003	0.04703	0.07096	0.02451	0.07329	0.03616
23299	OX359193.1	6497906	-0.03279	0.04712	-0.00747	0.02454	-0.00996	0.03622
23355	OX359193.1	6542179	0.04308	0.05114	0.00633	0.02587	0.00387	0.03892
23362	OX359193.1	6547833	0.20564	0.05160	0.19803	0.02600	0.16054	0.03922
23381	OX359193.1	6588284	0.18089	0.05441	0.02532	0.02677	0.02055	0.04113
23403	OX359193.1	6617975	0.08462	0.05591	0.08452	0.02701	0.08198	0.04200
23427	OX359193.1	6646344	-0.06725	0.05718	-0.06965	0.02765	0.10213	0.04305
23444	OX359193.1	6716196	-0.02185	0.05878	-0.00682	0.02931	0.05722	0.04481
23451	OX359193.1	6719345	0.31401	0.05884	0.09233	0.02944	0.06658	0.04491
23476	OX359193.1	6751223	0.01597	0.05970	0.00963	0.03110	0.01428	0.04627
23479	OX359193.1	6752796	-0.04961	0.05975	-0.03115	0.03122	-0.03321	0.04636
23497	OX359193.1	6770294	-0.02453	0.06058	-0.00133	0.03273	0.00691	0.04768
23537	OX359193.1	6811518	0.15331	0.06317	0.12870	0.03743	0.13482	0.05187
23556	OX359193.1	6851704	-0.05814	0.06762	-0.06139	0.04418	-0.06209	0.05831
23615	OX359193.1	6954129	0.28662	0.08596	0.17455	0.06668	0.18367	0.08095
23650	OX359193.1	6984329	-0.04961	0.09141	-0.03115	0.07228	-0.03321	0.08665
23657	OX359193.1	7001378	-0.00358	0.09413	0.03889	0.07480	0.12281	0.08926
23694	OX359193.1	7064743	0.07935	0.10018	0.05775	0.07876	0.06360	0.09310
23704	OX359193.1	7077555	0.30841	0.10044	0.39298	0.07832	0.41657	0.09260
23721	OX359193.1	7102128	0.13460	0.10019	0.09215	0.07681	0.08559	0.09081
23764	OX359193.1	7181696	-0.04961	0.08945	-0.03115	0.06360	-0.03321	0.07760
23770	OX359193.1	7191950	0.07928	0.08712	0.04161	0.06124	0.10458	0.07530
23779	OX359193.1	7200019	0.32792	0.08513	0.09315	0.05930	0.08451	0.07341
23793	OX359193.1	7222762	0.01597	0.07911	0.00963	0.05367	0.01428	0.06803
23831	OX359193.1	7306010	0.15331	0.04965	0.12870	0.03083	0.13482	0.04632
23854	OX359193.1	7330361	-0.03279	0.04040	-0.03457	0.02444	-0.03496	0.04021
23880	OX359193.1	7382736	0.01857	0.02257	0.00126	0.01330	0.09077	0.02920
23895	OX359193.1	7397077	-0.04762	0.01843	-0.01207	0.01089	0.00131	0.02671
23926	OX359193.1	7468902	-0.04762	0.00399	-0.01207	0.00418	-0.00793	0.01855
23932	OX359193.1	7479482	0.01150	0.00278	0.00129	0.00398	0.01257	0.01816
23938	OX359193.1	7481610	-0.07725	0.00256	-0.03489	0.00397	0.01239	0.01808
23960	OX359193.1	7517354	-0.02181	0.00071	-0.05479	0.00546	-0.04962	0.01843
23965	OX359193.1	7531070	0.01405	0.00026	0.01465	0.00621	0.01345	0.01872
23990	OX359193.1	7562918	-0.05437	0.00091	-0.04282	0.00994	-0.03538	0.02141
24014	OX359193.1	7622162	0.08547	0.00521	0.02034	0.02013	0.04215	0.03014
24042	OX359193.1	7683762	0.03612	0.01279	0.02862	0.03396	0.02390	0.04365
24050	OX359193.1	7698225	-0.03616	0.01508	-0.02452	0.03753	0.00433	0.04737
24056	OX359193.1	7706813	0.00343	0.01653	0.01538	0.03971	0.00087	0.04969
24071	OX359193.1	7724190	-0.00202	0.01965	-0.00102	0.04418	-0.00545	0.05463
24084	OX359193.1	7749765	0.05080	0.02487	0.24397	0.05113	0.24242	0.06243
24099	OX359193.1	7769565	-0.01662	0.02919	0.01390	0.05647	0.01278	0.06863
24101	OX359193.1	7775237	-0.05228	0.03060	-0.07379	0.05812	-0.05985	0.07057
24109	OX359193.1	7784359	0.03150	0.03302	0.12296	0.06091	0.11323	0.07385
24113	OX359193.1	7789430	-0.01496	0.03430	-0.00174	0.06232	0.00698	0.07553
24139	OX359193.1	7812086	0.06328	0.04075	0.11822	0.06919	0.14051	0.08379
24197	OX359193.1	7927801	-0.01187	0.07736	-0.01102	0.10021	0.16751	0.12321
24217	OX359193.1	7961520	0.61379	0.08322	0.60090	0.10174	0.60474	0.12647
24238	OX359193.1	8057262	-0.06667	0.06961	-0.07087	0.07645	-0.06865	0.10098
24259	OX359193.1	8122561	0.28822	0.04853	0.31355	0.05057	0.31034	0.07310
24282	OX359193.1	8161815	-0.02837	0.03887	-0.02970	0.03861	0.08716	0.06052
24306	OX359193.1	8196478	-0.03279	0.03335	-0.01551	0.03164	-0.01286	0.05340
24312	OX359193.1	8206220	-0.05814	0.03223	-0.06139	0.03007	-0.06209	0.05185
24314	OX359193.1	8210279	-0.03279	0.03188	-0.01551	0.02960	-0.01286	0.05138
24315	OX359193.1	8210282	-0.04215	0.03188	-0.04197	0.02960	-0.02954	0.05138
24335	OX359193.1	8236184	-0.03279	0.03039	-0.03457	0.02760	-0.03496	0.04958
24377	OX359193.1	8330327	0.08462	0.03434	0.08452	0.03453	0.08198	0.05773
24394	OX359193.1	8356349	0.06301	0.03674	0.07039	0.03926	0.06417	0.06267
24396	OX359193.1	8357176	-0.04189	0.03682	-0.05507	0.03943	0.02597	0.06284
24402	OX359193.1	8372927	-0.05814	0.03830	-0.06139	0.04264	-0.06209	0.06610
24415	OX359193.1	8387687	0.28662	0.03965	0.17455	0.04581	0.18367	0.06919
24417	OX359193.1	8390007	-0.02212	0.03986	-0.00127	0.04631	0.02957	0.06968
24418	OX359193.1	8390010	-0.06091	0.03986	-0.20469	0.04631	-0.19048	0.06968
24422	OX359193.1	8395253	0.13253	0.04030	0.04183	0.04745	0.22222	0.07080
24438	OX359193.1	8431565	0.09226	0.04256	0.14445	0.05491	0.18426	0.07788
24472	OX359193.1	8505157	-0.01010	0.04368	-0.01065	0.06641	-0.00787	0.08719
24482	OX359193.1	8524588	0.17195	0.04283	0.57831	0.06768	0.57338	0.08764
24485	OX359193.1	8528736	0.07923	0.04257	0.21026	0.06781	0.21316	0.08758
24506	OX359193.1	8597703	0.15331	0.03519	0.12870	0.06345	0.13482	0.07994
24507	OX359193.1	8606054	-0.01820	0.03405	-0.03160	0.06221	0.08844	0.07830
24518	OX359193.1	8649787	-0.05814	0.02756	-0.06139	0.05381	-0.06209	0.06789
24527	OX359193.1	8657887	0.03714	0.02636	0.01418	0.05205	0.00812	0.06581
24532	OX359193.1	8668513	-0.05814	0.02477	-0.06139	0.04962	-0.06209	0.06297
24539	OX359193.1	8680826	-0.05814	0.02276	-0.06139	0.04649	-0.06209	0.05937
24557	OX359193.1	8762993	0.01150	0.01057	0.00129	0.02538	0.01434	0.03579
24594	OX359194.1	70661	0.16361	0.05684	0.29767	0.08525	0.24855	0.08308
24608	OX359194.1	104015	0.03342	0.05948	0.00415	0.08468	0.02235	0.08482
24642	OX359194.1	166654	-0.05692	0.07189	-0.04260	0.09154	-0.04249	0.09594
24690	OX359194.1	291390	0.03547	0.12559	0.03492	0.13585	0.04805	0.14690
24710	OX359194.1	313138	-0.05814	0.13743	-0.06139	0.14607	-0.06209	0.15784
24713	OX359194.1	315270	-0.05814	0.13861	-0.06139	0.14708	-0.06209	0.15891
24715	OX359194.1	318052	0.11486	0.14013	0.01596	0.14840	0.03537	0.16031
24732	OX359194.1	347222	0.25333	0.15607	0.50234	0.16211	0.51220	0.17467
24749	OX359194.1	421377	0.34026	0.19150	0.28947	0.19190	0.40017	0.20466
24772	OX359194.1	455525	0.52791	0.20267	0.46294	0.20071	0.44899	0.21288
24780	OX359194.1	471463	0.28662	0.20631	0.17455	0.20336	0.18367	0.21513
24803	OX359194.1	510563	0.55833	0.21010	0.63309	0.20491	0.62312	0.21549
24845	OX359194.1	574529	-0.07725	0.20086	-0.03489	0.19321	-0.06589	0.20147
24859	OX359194.1	592079	0.13669	0.19490	0.06085	0.18677	0.08401	0.19444
24894	OX359194.1	660917	-0.04961	0.16050	-0.03115	0.14991	-0.03321	0.15653
25005	OX359194.1	951054	-0.04506	0.01333	-0.20859	-0.05694	-0.11121	0.00182
25072	OX359194.1	1193148	-0.00995	0.14061	0.15181	0.13166	0.16850	0.15025
25090	OX359194.1	1272172	0.57014	0.13668	0.48088	0.11268	0.50249	0.12803
25119	OX359194.1	1339875	0.01597	0.12826	0.00963	0.09080	0.01428	0.10625
25155	OX359194.1	1393131	-0.04455	0.12251	-0.01192	0.07739	-0.01533	0.09373
25169	OX359194.1	1431993	-0.06166	0.11866	-0.06503	0.07025	-0.06653	0.08733
25181	OX359194.1	1456250	0.19296	0.11611	0.02588	0.06659	0.05797	0.08407
25192	OX359194.1	1467044	-0.01033	0.11492	-0.06007	0.06504	-0.03697	0.08266
25238	OX359194.1	1526657	0.39241	0.10573	0.13191	0.05766	0.17460	0.07577
25239	OX359194.1	1526660	0.36364	0.10573	0.26519	0.05766	0.27386	0.07577
25242	OX359194.1	1528408	0.17977	0.10541	0.16739	0.05745	0.16335	0.07556
25273	OX359194.1	1568905	-0.01850	0.09679	-0.02447	0.05245	0.06063	0.07036
25294	OX359194.1	1610265	0.14671	0.08635	0.11985	0.04716	0.17803	0.06456
25317	OX359194.1	1637111	0.01560	0.07903	0.01286	0.04372	0.00354	0.06073
25318	OX359194.1	1637114	-0.03435	0.07903	-0.00185	0.04372	0.00662	0.06073
25355	OX359194.1	1702233	-0.05814	0.06181	-0.06139	0.03696	-0.06209	0.05325
25360	OX359194.1	1716064	0.05197	0.05856	0.06682	0.03607	0.06963	0.05231
25386	OX359194.1	1756069	0.13625	0.05012	0.01722	0.03460	0.00387	0.05107
25393	OX359194.1	1769391	-0.05814	0.04787	-0.06139	0.03468	-0.06209	0.05130
25403	OX359194.1	1779383	0.00227	0.04631	-0.02732	0.03488	-0.00653	0.05164
25454	OX359194.1	1879777	0.21637	0.03472	0.19579	0.04101	0.29963	0.05997
25457	OX359194.1	1879883	-0.05814	0.03471	-0.06139	0.04102	-0.06209	0.05998
25463	OX359194.1	1888358	0.16159	0.03399	0.16713	0.04178	0.13452	0.06095
25476	OX359194.1	1896739	0.09661	0.03321	0.00664	0.04245	0.06323	0.06182
25482	OX359194.1	1907276	0.14621	0.03212	0.01771	0.04327	0.01266	0.06285
25504	OX359194.1	1926287	-0.02576	0.03041	0.26555	0.04473	0.32331	0.06473
25511	OX359194.1	1939629	-0.05166	0.02916	-0.02588	0.04553	-0.01533	0.06578
25534	OX359194.1	1963567	-0.05220	0.02684	-0.15332	0.04678	-0.09838	0.06751
25542	OX359194.1	1972862	-0.05812	0.02590	-0.00569	0.04714	0.03110	0.06804
25553	OX359194.1	1987369	-0.05443	0.02380	-0.13327	0.04723	-0.13843	0.06841
25565	OX359194.1	2016117	0.05268	0.02092	0.40954	0.04732	0.40828	0.06895
25572	OX359194.1	2027022	0.06607	0.01976	0.12022	0.04709	0.12281	0.06883
25628	OX359194.1	2175310	-0.03458	0.00421	-0.03036	0.02408	0.06771	0.04552
25659	OX359194.1	2247754	-0.00587	0.00320	-0.00575	0.01021	-0.01760	0.02896
25665	OX359194.1	2253759	-0.02148	0.00339	-0.01932	0.00934	-0.00716	0.02784
25674	OX359194.1	2260147	0.00109	0.00363	-0.02041	0.00848	-0.10701	0.02672
25677	OX359194.1	2260700	-0.03388	0.00365	-0.03622	0.00841	0.13019	0.02662
25717	OX359194.1	2356644	0.02368	0.01403	0.02476	0.00595	-0.00354	0.02230
25728	OX359194.1	2376897	0.02351	0.01776	0.00515	0.00762	0.00354	0.02451
25742	OX359194.1	2389178	0.02425	0.02037	0.01084	0.00938	0.00681	0.02685
25796	OX359194.1	2453546	0.07455	0.03868	0.00572	0.02541	-0.00000	0.04849
25862	OX359194.1	2583716	-0.01478	0.08536	-0.11097	0.07608	0.09770	0.11070
25892	OX359194.1	2648022	0.12437	0.09669	0.26711	0.08949	0.26810	0.12161
25896	OX359194.1	2681964	0.10978	0.09684	0.09406	0.09013	0.20969	0.11936
25929	OX359194.1	2738260	0.27514	0.08978	0.23966	0.08341	0.22575	0.10713
25934	OX359194.1	2741358	0.13460	0.08900	0.09215	0.08265	0.08559	0.10605
25952	OX359194.1	2782459	0.23592	0.07955	0.21946	0.07337	0.22495	0.09300
25958	OX359194.1	2788092	0.02371	0.07803	-0.00305	0.07190	0.01545	0.09104
25991	OX359194.1	2839194	0.03612	0.06336	0.02862	0.05783	0.02390	0.07309
26006	OX359194.1	2858038	0.10220	0.05779	0.08315	0.05254	0.10314	0.06650
26033	OX359194.1	2897425	-0.06217	0.04700	-0.04913	0.04236	0.05629	0.05392
26039	OX359194.1	2911545	-0.03501	0.04358	-0.01122	0.03965	-0.01230	0.05042
26064	OX359194.1	2963661	-0.05814	0.03455	-0.06139	0.03201	-0.06209	0.04009
26068	OX359194.1	2966321	0.00189	0.03429	0.00022	0.03182	-0.01331	0.03978
26072	OX359194.1	2968967	-0.00256	0.03405	-0.00156	0.03166	-0.03448	0.03949
26077	OX359194.1	2973901	-0.05692	0.03365	-0.04260	0.03142	-0.04249	0.03902
26146	OX359194.1	3177231	0.00277	0.08735	0.00040	0.10878	-0.01134	0.11182
26155	OX359194.1	3190812	-0.03554	0.09134	-0.03053	0.11609	-0.02881	0.11931
26172	OX359194.1	3211175	0.57014	0.09596	0.48088	0.12546	0.50249	0.12895
26272	OX359194.1	3358794	0.01597	0.08958	0.42714	0.13115	0.42085	0.13729
26279	OX359194.1	3367733	-0.04012	0.08796	-0.00962	0.12875	-0.01331	0.13503
26302	OX359194.1	3395137	-0.06667	0.08229	-0.02518	0.11984	-0.03299	0.12646
26331	OX359194.1	3438410	0.10735	0.07384	0.13825	0.10468	0.15066	0.11160
26342	OX359194.1	3449840	0.52703	0.07144	0.48410	0.10029	0.48980	0.10722
26374	OX359194.1	3483808	0.12716	0.06498	0.13233	0.08737	0.21492	0.09425
26375	OX359194.1	3483811	-0.02457	0.06498	-0.02193	0.08737	-0.02477	0.09425
26394	OX359194.1	3512159	0.04712	0.06003	0.00260	0.07713	-0.00000	0.08384
26406	OX359194.1	3542045	0.02697	0.05579	0.02809	0.06733	0.03746	0.07376
26407	OX359194.1	3542048	-0.04727	0.05579	-0.02857	0.06733	-0.02804	0.07376
26446	OX359194.1	3606957	-0.03941	0.05232	-0.03652	0.05170	-0.03872	0.05732
26449	OX359194.1	3609195	-0.03941	0.05233	-0.03652	0.05125	-0.03872	0.05683
26479	OX359194.1	3651542	-0.04349	0.05701	-0.03731	0.04742	-0.04465	0.05250
26481	OX359194.1	3654045	-0.05387	0.05747	-0.05253	0.04735	-0.05381	0.05241
26493	OX359194.1	3675596	0.05733	0.06207	0.02920	0.04732	0.03846	0.05218
26574	OX359194.1	3806303	0.36364	0.11778	0.26519	0.07146	0.27386	0.07650
26586	OX359194.1	3838472	-0.04961	0.13038	-0.03115	0.07702	-0.03321	0.08234
26615	OX359194.1	3885335	0.45232	0.14047	0.34280	0.08050	0.33643	0.08609
26630	OX359194.1	3907944	0.23211	0.14080	0.03874	0.07891	0.05288	0.08451
26631	OX359194.1	3907947	0.22078	0.14080	0.11565	0.07891	0.15553	0.08451
26660	OX359194.1	4021256	-0.05994	0.11090	-0.06348	0.05299	-0.06007	0.05722
26669	OX359194.1	4057708	-0.02242	0.09356	-0.04513	0.04040	-0.04726	0.04374
26697	OX359194.1	4155970	0.01790	0.04590	-0.00348	0.00949	-0.01507	0.00999
26753	OX359194.1	4445342	0.00592	0.01711	0.00063	0.00855	0.00332	0.01065
26756	OX359194.1	4446366	-0.02453	0.01717	-0.00133	0.00860	0.00691	0.01070
26781	OX359194.1	4557647	0.10807	0.02247	0.04217	0.01495	0.03547	0.01907
26813	OX359194.1	4727676	-0.02453	0.04154	-0.00133	0.03989	0.00691	0.05276
26817	OX359194.1	4737452	-0.00322	0.04408	-0.00036	0.04231	0.00387	0.05573
26827	OX359194.1	4744935	-0.02453	0.04604	-0.00133	0.04423	0.00691	0.05808
26890	OX359194.1	4848207	0.00230	0.07353	0.03405	0.07134	0.03433	0.08900
26933	OX359194.1	4926985	0.10506	0.08646	0.14584	0.08876	0.18567	0.10541
26939	OX359194.1	4931943	0.10687	0.08683	0.00699	0.08963	0.12030	0.10610
26952	OX359194.1	4946348	0.01150	0.08764	0.00129	0.09198	0.01434	0.10782
26956	OX359194.1	4954687	0.45232	0.08793	0.34280	0.09326	0.33643	0.10871
26998	OX359194.1	5029529	-0.00322	0.08595	-0.00036	0.10210	0.00387	0.11290
27022	OX359194.1	5063208	-0.03279	0.08327	-0.01551	0.10470	-0.01286	0.11301
27023	OX359194.1	5063211	-0.02427	0.08327	0.00019	0.10470	0.02931	0.11301
27030	OX359194.1	5067751	0.34999	0.08287	0.35092	0.10500	0.35846	0.11297
27032	OX359194.1	5070104	-0.00640	0.08266	-0.01356	0.10515	0.02216	0.11295
27063	OX359194.1	5120297	0.24196	0.07837	0.25248	0.10786	0.25256	0.11189
27064	OX359194.1	5120300	-0.05814	0.07837	-0.06139	0.10786	-0.06209	0.11189
27100	OX359194.1	5173015	0.11858	0.07549	0.74168	0.10998	0.67532	0.11038
27108	OX359194.1	5184040	0.10781	0.07536	0.03122	0.11048	0.01980	0.11019
27122	OX359194.1	5207113	-0.00322	0.07557	-0.00036	0.11151	0.00387	0.10988
27146	OX359194.1	5224969	-0.06667	0.07632	-0.07087	0.11233	-0.08441	0.10975
27147	OX359194.1	5224972	-0.05814	0.07632	-0.06139	0.11233	-0.06209	0.10975
27196	OX359194.1	5302889	0.13460	0.08625	0.12921	0.11733	0.11734	0.11198
27230	OX359194.1	5354226	0.24196	0.09854	0.25248	0.12262	0.25256	0.11661
27254	OX359194.1	5392320	0.06103	0.10989	0.05783	0.12767	0.02043	0.12133
27301	OX359194.1	5456755	0.08612	0.12934	0.06990	0.13499	0.04326	0.12936
27308	OX359194.1	5474148	0.30051	0.13403	0.26986	0.13644	0.33027	0.13092
27419	OX359194.1	5665891	0.21717	0.13607	0.24409	0.09927	0.18236	0.09777
27447	OX359194.1	5709778	0.03612	0.12809	0.02862	0.08566	0.02390	0.08708
27497	OX359194.1	5828322	0.39465	0.10530	0.33031	0.06342	0.27451	0.07202
27506	OX359194.1	5841029	-0.03528	0.10291	-0.14959	0.06281	-0.17647	0.07186
27509	OX359194.1	5850977	0.26241	0.10107	0.04017	0.06257	0.17460	0.07195
27527	OX359194.1	5873413	0.07229	0.09680	0.01614	0.06282	0.02135	0.07261
27547	OX359194.1	5892558	0.07432	0.09315	0.06658	0.06393	0.07222	0.07386
27556	OX359194.1	5904727	-0.02210	0.09085	-0.03644	0.06509	-0.01729	0.07500
27594	OX359194.1	5981984	0.03949	0.07654	0.06430	0.08111	0.06152	0.08925
27627	OX359194.1	6025489	0.01848	0.06968	0.00221	0.09747	0.04215	0.10322
27658	OX359194.1	6061362	0.01830	0.06487	0.09959	0.11432	0.11022	0.11775
27690	OX359194.1	6156082	0.12923	0.05141	0.73953	0.14873	0.60508	0.14968
27792	OX359194.1	6364350	0.03908	0.01089	0.00539	0.02633	0.15612	0.04416
27858	OX359194.1	6408531	-0.03682	0.00802	-0.15699	0.01389	-0.10072	0.02889
27878	OX359194.1	6441300	0.07904	0.00748	0.05260	0.00984	0.04632	0.02220
27912	OX359194.1	6513033	-0.05644	0.01029	-0.03731	0.00966	-0.03743	0.01622
27916	OX359194.1	6516338	0.01117	0.01052	0.14661	0.00981	0.12200	0.01612
27917	OX359194.1	6517019	-0.04836	0.01057	-0.02966	0.00984	-0.01010	0.01611
27931	OX359194.1	6533639	-0.00202	0.01180	-0.00102	0.01070	-0.00545	0.01584
27949	OX359194.1	6564524	-0.03279	0.01476	-0.01551	0.01280	-0.01286	0.01607
27958	OX359194.1	6576617	0.03612	0.01602	0.02862	0.01371	0.02390	0.01636
27969	OX359194.1	6594721	0.00826	0.01805	0.00104	0.01518	-0.01506	0.01695
28022	OX359194.1	6651178	0.03612	0.02573	0.02862	0.02119	0.02390	0.02093
28024	OX359194.1	6654964	-0.03831	0.02628	-0.01689	0.02166	0.00071	0.02130
28027	OX359194.1	6657541	-0.05767	0.02666	-0.02115	0.02198	-0.01506	0.02156
28040	OX359194.1	6680386	0.12583	0.03013	0.01665	0.02508	0.01020	0.02415
28041	OX359194.1	6687980	0.03705	0.03132	0.08346	0.02620	0.08462	0.02514
28053	OX359194.1	6718193	0.03612	0.03616	0.02862	0.03122	0.02390	0.02987
28078	OX359194.1	6756766	0.30233	0.04295	0.18773	0.03943	0.17643	0.03811
28080	OX359194.1	6760181	0.01405	0.04355	0.01465	0.04022	0.01345	0.03893
28093	OX359194.1	6771424	0.13625	0.04584	0.01722	0.04314	0.00387	0.04198
28106	OX359194.1	6796588	-0.03279	0.05056	-0.01551	0.04986	-0.01286	0.04913
28113	OX359194.1	6816827	-0.05685	0.05443	-0.04927	0.05577	-0.09012	0.05545
28119	OX359194.1	6833677	-0.05387	0.05764	-0.05253	0.06089	-0.05381	0.06108
28172	OX359194.1	6953060	0.42929	0.07801	0.66115	0.09479	0.66273	0.09910
28184	OX359194.1	6974230	-0.02212	0.08109	-0.00127	0.09927	0.02957	0.10415
28194	OX359194.1	6986844	0.00189	0.08277	0.00022	0.10165	0.00343	0.10682
28195	OX359194.1	6986847	-0.03616	0.08277	-0.02452	0.10165	0.00433	0.10682
28205	OX359194.1	6999284	0.14621	0.08432	0.06803	0.10374	0.05797	0.10915
28212	OX359194.1	7005035	0.10638	0.08495	0.10513	0.10455	0.11504	0.11015
28220	OX359194.1	7015446	0.00546	0.08620	0.00148	0.10608	0.03860	0.11185
28227	OX359194.1	7037386	-0.00368	0.08881	-0.00063	0.10900	-0.01655	0.11508
28242	OX359194.1	7047717	0.03347	0.09007	0.02911	0.11028	0.02072	0.11649
28252	OX359194.1	7060621	0.26555	0.09160	0.47464	0.11170	0.47974	0.11804
28265	OX359194.1	7086768	0.20792	0.09481	0.11602	0.11436	0.09014	0.12088
28269	OX359194.1	7094078	-0.04489	0.09574	-0.00823	0.11506	0.02309	0.12163
28289	OX359194.1	7140825	-0.04012	0.10215	-0.00962	0.11984	-0.01331	0.12674
28290	OX359194.1	7140828	0.14081	0.10215	0.14937	0.11984	0.13127	0.12674
28291	OX359194.1	7142565	-0.04502	0.10239	-0.00254	0.12000	0.07407	0.12691
28305	OX359194.1	7174070	-0.03554	0.10666	-0.03053	0.12260	-0.02881	0.12981
28309	OX359194.1	7176776	0.27144	0.10700	0.47615	0.12276	0.47059	0.13005
28326	OX359194.1	7203730	0.22581	0.11054	0.12069	0.12482	0.09860	0.13257
28330	OX359194.1	7212157	0.36364	0.11153	0.26519	0.12545	0.27386	0.13342
28417	OX359194.1	7382940	0.39241	0.10023	0.36954	0.11651	0.35972	0.13406
28437	OX359194.1	7413951	0.07003	0.09114	0.07096	0.10978	0.07329	0.12899
28472	OX359194.1	7449288	-0.07463	0.08184	-0.08039	0.10303	0.09174	0.12342
28480	OX359194.1	7459944	-0.02457	0.07925	-0.02193	0.10090	-0.02477	0.12150
28533	OX359194.1	7545720	-0.02674	0.06552	-0.02406	0.08475	0.03746	0.10454
28534	OX359194.1	7545723	0.26239	0.06552	0.61118	0.08475	0.60497	0.10454
28545	OX359194.1	7555127	-0.05814	0.06475	-0.06139	0.08312	-0.06209	0.10263
28567	OX359194.1	7600015	-0.04961	0.06226	-0.03115	0.07523	-0.03321	0.09299
28571	OX359194.1	7601482	0.11988	0.06220	0.11781	0.07496	0.12706	0.09266
28573	OX359194.1	7602739	0.04200	0.06215	0.03606	0.07473	0.03936	0.09238
28589	OX359194.1	7624400	0.05955	0.06121	0.04070	0.07061	0.09804	0.08722
28638	OX359194.1	7743785	-0.06780	0.05304	-0.07264	0.04541	0.10000	0.05517
28640	OX359194.1	7747420	0.62374	0.05264	0.42422	0.04462	0.40279	0.05416
28650	OX359194.1	7754714	0.01405	0.05180	0.01465	0.04303	0.01345	0.05214
28654	OX359194.1	7766584	0.13307	0.05034	0.12281	0.04044	0.11158	0.04886
28661	OX359194.1	7776556	-0.05814	0.04902	-0.06139	0.03828	-0.06209	0.04612
28665	OX359194.1	7787545	-0.07843	0.04747	-0.08410	0.03591	-0.12043	0.04313
28706	OX359194.1	7829052	-0.06318	0.04112	-0.03856	0.02734	-0.06791	0.03238
28724	OX359194.1	7846342	-0.02932	0.03810	-0.02899	0.02380	-0.02746	0.02801
28749	OX359194.1	7881626	-0.05692	0.03209	-0.04260	0.01727	-0.04249	0.01998
28760	OX359194.1	7910890	0.06082	0.02710	0.02240	0.01250	0.01869	0.01407
28762	OX359194.1	7913610	0.01405	0.02664	0.01465	0.01207	0.01345	0.01356
28785	OX359194.1	7941801	0.13182	0.02186	0.09145	0.00795	0.09860	0.00861
28786	OX359194.1	7941804	0.04063	0.02185	0.00235	0.00795	-0.00283	0.00861
28838	OX359194.1	8039198	-0.05814	0.01192	-0.06139	0.00320	-0.06209	0.00145
28870	OX359194.1	8069883	-0.03279	0.01220	-0.03457	0.00665	-0.03496	0.00412
28873	OX359194.1	8073643	-0.05814	0.01240	-0.06139	0.00731	-0.06209	0.00468
28875	OX359194.1	8083944	-0.05814	0.01311	-0.06139	0.00935	-0.06209	0.00639
28949	OX359194.1	8270187	0.29080	0.05201	0.29461	0.08695	0.26027	0.08076
28952	OX359194.1	8285532	0.13742	0.05402	0.13841	0.09185	0.12152	0.08591
28985	OX359194.1	8349833	-0.00398	0.05664	0.14440	0.10309	0.14773	0.09909
28989	OX359194.1	8357124	-0.05644	0.05648	-0.03731	0.10350	-0.03743	0.09980
29001	OX359194.1	8370872	-0.01683	0.05607	0.02729	0.10406	0.03393	0.10097
29011	OX359194.1	8390622	-0.08108	0.05515	-0.01796	0.10379	-0.05240	0.10163
29017	OX359194.1	8407386	0.30135	0.05420	0.25556	0.10304	0.25018	0.10171
29062	OX359194.1	8477441	0.06056	0.05102	0.40457	0.09547	0.40402	0.09773
29100	OX359194.1	8565695	-0.03279	0.05361	-0.01551	0.08452	-0.01286	0.09047
29103	OX359194.1	8572798	0.03612	0.05425	0.02862	0.08381	0.02390	0.08998
29104	OX359194.1	8575301	0.01597	0.05449	0.00963	0.08357	0.01428	0.08981
29107	OX359194.1	8580533	0.02740	0.05503	0.00351	0.08310	0.08907	0.08949
29124	OX359194.1	8610313	-0.02183	0.05891	-0.01503	0.08109	-0.01138	0.08819
29139	OX359194.1	8640708	-0.03279	0.06429	-0.01551	0.08035	-0.01286	0.08793
29159	OX359194.1	8704113	0.45232	0.07992	0.34280	0.08336	0.33643	0.09125
29204	OX359195.1	87912	0.15778	0.11444	0.25557	0.13883	0.25776	0.13972
29205	OX359195.1	87915	0.20998	0.11444	0.07069	0.13883	0.15295	0.13972
29211	OX359195.1	100689	0.31044	0.11063	0.54408	0.13386	0.47146	0.13484
29249	OX359195.1	189334	0.13460	0.08409	0.09215	0.10016	0.08559	0.10274
29253	OX359195.1	197825	-0.02932	0.08163	-0.02899	0.09716	-0.01317	0.09999
29258	OX359195.1	203798	-0.01756	0.07992	-0.02812	0.09510	-0.08696	0.09811
29263	OX359195.1	209163	-0.01247	0.07841	-0.01275	0.09329	0.00000	0.09646
29330	OX359195.1	338222	0.19783	0.04999	0.18467	0.06546	0.32730	0.07337
29337	OX359195.1	347141	-0.07843	0.04898	-0.08410	0.06521	-0.12043	0.07340
29338	OX359195.1	347144	-0.06195	0.04898	-0.05529	0.06521	-0.08043	0.07340
29413	OX359195.1	482322	0.08287	0.06149	0.18896	0.09270	0.20538	0.10167
29429	OX359195.1	630752	0.14249	0.09639	0.29082	0.12016	0.29162	0.12827
29439	OX359195.1	660860	-0.04679	0.10222	-0.04670	0.12309	-0.03681	0.13179
29452	OX359195.1	674792	-0.08108	0.10455	-0.08738	0.12408	-0.11913	0.13308
29465	OX359195.1	714807	0.32625	0.11083	0.32442	0.12692	0.32862	0.13688
29470	OX359195.1	721309	0.11988	0.11180	0.11781	0.12739	0.12706	0.13752
29481	OX359195.1	737103	0.05463	0.11408	0.04575	0.12853	0.03974	0.13908
29490	OX359195.1	751558	-0.03279	0.11610	-0.01551	0.12959	-0.01286	0.14052
29532	OX359195.1	804832	0.26844	0.12313	0.32013	0.13378	0.40482	0.14604
29536	OX359195.1	817156	0.26313	0.12452	0.26208	0.13463	0.22391	0.14718
29539	OX359195.1	823446	-0.02962	0.12521	-0.19168	0.13507	-0.12994	0.14775
29542	OX359195.1	825237	0.15024	0.12541	0.12396	0.13519	0.16037	0.14792
29555	OX359195.1	844093	0.17755	0.12740	0.39442	0.13648	0.39210	0.14960
29576	OX359195.1	886180	0.36129	0.13142	0.39157	0.13921	0.41070	0.15309
29580	OX359195.1	890234	0.08794	0.13178	0.01902	0.13946	0.02165	0.15340
29582	OX359195.1	891431	0.01150	0.13188	0.00129	0.13953	0.01434	0.15349
29682	OX359195.1	1430830	-0.05581	0.04333	-0.05756	0.02843	-0.05796	0.03866
29706	OX359195.1	1463937	-0.06166	0.04570	-0.06503	0.03012	-0.04055	0.04029
29713	OX359195.1	1472606	0.08032	0.04630	0.15214	0.03055	0.14869	0.04070
29720	OX359195.1	1488898	-0.06667	0.04733	-0.05590	0.03133	-0.05344	0.04141
29721	OX359195.1	1488901	0.07935	0.04733	0.05775	0.03133	0.06360	0.04141
29728	OX359195.1	1498865	-0.04373	0.04791	-0.00707	0.03179	-0.00134	0.04184
29731	OX359195.1	1502006	0.19296	0.04810	0.02588	0.03194	0.05797	0.04197
29758	OX359195.1	1537171	0.40949	0.04999	0.31615	0.03362	0.34498	0.04337
29762	OX359195.1	1539617	-0.03435	0.05011	-0.00185	0.03373	0.00662	0.04346
29811	OX359195.1	1621165	-0.05351	0.05268	-0.08531	0.03817	-0.09187	0.04650
29882	OX359195.1	1746770	0.01597	0.04515	0.00963	0.04360	0.01428	0.04750
29939	OX359195.1	1823290	0.17922	0.03124	0.22772	0.03791	0.22192	0.03955
29984	OX359195.1	1904769	-0.03274	0.01258	-0.00187	0.02290	-0.01361	0.02362
29994	OX359195.1	1925512	0.00802	0.00784	0.00762	0.01829	0.01011	0.01890
30004	OX359195.1	1946825	-0.00596	0.00318	0.00928	0.01385	0.03587	0.01439
30020	OX359195.1	1976712	0.00826	-0.00291	0.01314	0.00823	0.00865	0.00867
30104	OX359195.1	2100389	-0.01192	-0.01697	-0.02857	0.00320	-0.02857	0.00322
30105	OX359195.1	2100392	-0.05814	-0.01697	-0.06139	0.00320	-0.06209	0.00322
30106	OX359195.1	2104127	-0.05387	-0.01707	-0.05253	0.00368	-0.05381	0.00368
30112	OX359195.1	2107372	-0.05814	-0.01714	-0.06139	0.00413	-0.06209	0.00411
30181	OX359195.1	2291728	0.05774	0.01475	0.36086	0.07759	0.36121	0.07534
30190	OX359195.1	2326799	0.03612	0.02964	0.02862	0.09593	0.02390	0.09285
30258	OX359195.1	2567846	0.33945	0.12440	0.12803	0.11557	0.06629	0.11672
30277	OX359195.1	2607471	0.07026	0.11657	0.14786	0.10562	0.18803	0.11007
30336	OX359195.1	2785027	0.02224	0.07311	0.12397	0.07847	0.09380	0.09216
30338	OX359195.1	2787064	-0.01505	0.07248	-0.04780	0.07810	0.00867	0.09177
30368	OX359195.1	2832293	0.10267	0.06415	0.14584	0.07491	0.18567	0.08853
30376	OX359195.1	2839312	0.21208	0.06284	0.20353	0.07445	0.20676	0.08797
30381	OX359195.1	2845524	0.00590	0.06167	-0.10417	0.07403	-0.09743	0.08745
30530	OX359195.1	3071276	-0.01033	0.03786	-0.00128	0.05637	0.05368	0.06113
30540	OX359195.1	3097438	0.07072	0.04058	0.49741	0.05557	0.48755	0.05971
30542	OX359195.1	3099998	-0.05581	0.04092	-0.05756	0.05553	-0.05796	0.05962
30550	OX359195.1	3112109	0.07935	0.04272	0.05775	0.05544	0.06360	0.05931
30561	OX359195.1	3145245	0.12583	0.04917	0.01665	0.05618	0.01020	0.05956
30564	OX359195.1	3148395	-0.05581	0.04989	-0.05756	0.05633	-0.05796	0.05967
30576	OX359195.1	3158917	-0.07143	0.05246	-0.07656	0.05693	-0.09272	0.06015
30579	OX359195.1	3160780	0.03819	0.05293	0.00898	0.05705	-0.01801	0.06026
30614	OX359195.1	3212700	0.00932	0.06873	-0.00492	0.06269	0.02124	0.06547
30630	OX359195.1	3236205	-0.04961	0.07740	-0.03115	0.06661	-0.03321	0.06927
30657	OX359195.1	3302404	0.19296	0.10533	0.02588	0.08230	0.05797	0.08437
30660	OX359195.1	3315325	0.14621	0.11120	0.06803	0.08600	0.05797	0.08795
30661	OX359195.1	3319163	0.06138	0.11296	0.04753	0.08714	0.07856	0.08904
30672	OX359195.1	3359064	0.26949	0.13143	0.26848	0.09967	0.31820	0.10105
30679	OX359195.1	3380033	0.15235	0.14109	0.04929	0.10667	0.01303	0.10769
30680	OX359195.1	3381343	0.52464	0.14169	0.53702	0.10711	0.48276	0.10811
30758	OX359195.1	3846307	-0.01134	0.11732	-0.00720	0.06009	-0.00328	0.08484
30774	OX359195.1	3917609	0.17459	0.13701	0.05191	0.07563	0.09727	0.10116
30819	OX359195.1	4056922	0.05072	0.14685	-0.00974	0.08456	0.00678	0.10700
30838	OX359195.1	4084891	0.22486	0.14392	0.21656	0.08212	0.24859	0.10335
30842	OX359195.1	4085227	0.28041	0.14387	0.25246	0.08208	0.29366	0.10329
30848	OX359195.1	4095275	0.15329	0.14245	0.05116	0.08086	0.09302	0.10161
30851	OX359195.1	4100684	0.23211	0.14162	0.15065	0.08014	0.17189	0.10062
30875	OX359195.1	4155064	0.14621	0.13021	0.01771	0.07020	0.01266	0.08776
30887	OX359195.1	4211514	-0.02639	0.11627	-0.00136	0.05781	-0.00000	0.07210
30929	OX359195.1	4308976	0.11401	0.09507	0.05493	0.04009	0.09919	0.04919
30935	OX359195.1	4326398	0.14621	0.09252	0.01771	0.03836	0.01266	0.04667
30952	OX359195.1	4357436	0.13460	0.08932	0.09215	0.03696	0.08559	0.04395
30963	OX359195.1	4368540	-0.05814	0.08853	-0.06139	0.03702	-0.06209	0.04354
30990	OX359195.1	4396317	0.07017	0.08795	0.00418	0.03874	0.02721	0.04427
31014	OX359195.1	4438662	0.03612	0.08966	0.02862	0.04579	0.02390	0.05030
31020	OX359195.1	4456126	0.14621	0.09157	0.01771	0.05048	0.01266	0.05462
31095	OX359195.1	4554334	-0.05814	0.11243	-0.06139	0.09420	-0.06209	0.09866
31137	OX359195.1	4612300	0.30135	0.12719	0.25556	0.12472	0.25018	0.13198
31186	OX359195.1	4668121	0.00015	0.13472	-0.04375	0.14461	-0.03339	0.15621
31209	OX359195.1	4708778	0.16307	0.13384	0.33742	0.14951	0.33059	0.16493
31217	OX359195.1	4732434	0.41802	0.13104	0.49341	0.14894	0.49109	0.16678
31223	OX359195.1	4750043	0.29016	0.12789	0.28729	0.14689	0.30736	0.16644
31229	OX359195.1	4757345	0.03612	0.12621	0.02862	0.14547	0.02390	0.16568
31292	OX359195.1	4852554	-0.06288	0.09408	-0.01803	0.11193	0.09860	0.13785
31293	OX359195.1	4852651	-0.02093	0.09404	-0.00631	0.11188	-0.03947	0.13780
31298	OX359195.1	4858730	0.03175	0.09142	0.03120	0.10889	0.12935	0.13489
31354	OX359195.1	4932156	0.37624	0.05954	0.24339	0.07103	0.41315	0.09507
31365	OX359195.1	4959130	-0.05644	0.04882	-0.03731	0.05772	-0.03743	0.07997
31379	OX359195.1	4979658	0.23121	0.04174	0.38492	0.04862	0.35897	0.06933
31438	OX359195.1	5062812	-0.03279	0.02254	-0.03457	0.02121	-0.03496	0.03557
31453	OX359195.1	5077978	-0.03435	0.02101	-0.00185	0.01820	0.00662	0.03151
31458	OX359195.1	5080516	-0.08108	0.02080	-0.03930	0.01779	-0.07203	0.03092
31474	OX359195.1	5099478	-0.03279	0.01971	-0.01551	0.01496	-0.01286	0.02689
31483	OX359195.1	5118420	-0.05963	0.01967	-0.05995	0.01312	-0.05703	0.02391
31488	OX359195.1	5128261	-0.07843	0.01983	-0.08410	0.01239	-0.05589	0.02266
31500	OX359195.1	5143340	0.07935	0.02055	0.05775	0.01176	0.06360	0.02121
31504	OX359195.1	5147113	-0.04116	0.02081	-0.17699	0.01169	-0.17925	0.02093
31531	OX359195.1	5169670	-0.00809	0.02282	-0.01720	0.01167	0.11813	0.01977
31543	OX359195.1	5181941	-0.00335	0.02438	0.05094	0.01222	0.04731	0.01971
31562	OX359195.1	5198946	-0.01033	0.02668	-0.00128	0.01313	0.01927	0.01981
31565	OX359195.1	5205001	-0.00539	0.02756	-0.04026	0.01354	-0.03785	0.01993
31569	OX359195.1	5214987	0.15331	0.02940	0.12870	0.01463	0.13482	0.02057
31592	OX359195.1	5268278	-0.05463	0.04097	-0.14531	0.02261	-0.13422	0.02631
31599	OX359195.1	5275493	0.01678	0.04269	0.01593	0.02390	0.01134	0.02734
31605	OX359195.1	5279130	-0.03967	0.04356	-0.00273	0.02457	-0.03803	0.02788
31624	OX359195.1	5290364	0.06250	0.04619	0.06571	0.02661	0.02128	0.02954
31639	OX359195.1	5323125	0.35135	0.05375	0.25292	0.03274	0.23817	0.03472
31655	OX359195.1	5358306	0.16306	0.06065	0.09282	0.03899	0.04624	0.04057
31682	OX359195.1	5423106	0.32893	0.06566	0.32399	0.04615	0.35154	0.04850
31701	OX359195.1	5474318	0.07511	0.06163	0.00993	0.04642	0.00332	0.05050
31714	OX359195.1	5503022	0.03612	0.05700	0.02862	0.04541	0.02390	0.05053
31728	OX359195.1	5525459	0.01639	0.05278	0.00222	0.04458	0.00280	0.05043
31730	OX359195.1	5529389	0.00647	0.05207	0.08356	0.04448	0.05745	0.05045
31734	OX359195.1	5534562	-0.05629	0.05093	-0.00553	0.04419	0.04762	0.05028
31749	OX359195.1	5554340	0.21250	0.04700	0.10203	0.04370	0.11067	0.05022
31763	OX359195.1	5572811	-0.07143	0.04350	-0.07656	0.04376	0.01079	0.05056
31805	OX359195.1	5641682	-0.03554	0.03402	-0.03053	0.04905	-0.02881	0.05566
31806	OX359195.1	5646232	-0.03178	0.03366	-0.06633	0.04967	-0.06178	0.05623
31859	OX359195.1	5736099	-0.03459	0.03288	-0.03925	0.06559	-0.03872	0.07015
31877	OX359195.1	5757571	-0.05692	0.03385	-0.04260	0.06914	-0.04249	0.07315
31904	OX359195.1	5806745	0.07008	0.03639	0.22241	0.07467	0.20575	0.07744
31905	OX359195.1	5806748	0.23436	0.03639	0.27636	0.07467	0.28631	0.07744
31910	OX359195.1	5811993	0.01235	0.03660	0.01010	0.07503	-0.03785	0.07769
31913	OX359195.1	5816131	0.00484	0.03683	0.37920	0.07527	0.43038	0.07784
31917	OX359195.1	5821404	-0.05814	0.03711	-0.06139	0.07554	-0.06209	0.07798
31922	OX359195.1	5831462	-0.05814	0.03779	-0.06139	0.07591	-0.06209	0.07811
31923	OX359195.1	5832144	-0.05814	0.03783	-0.06139	0.07592	-0.06209	0.07811
31940	OX359195.1	5851533	0.28662	0.03871	0.17455	0.07592	0.18367	0.07766
31943	OX359195.1	5855635	0.18532	0.03887	0.45449	0.07581	0.47164	0.07746
31991	OX359195.1	5982338	-0.07143	0.03877	-0.07656	0.05451	-0.09272	0.05462
31993	OX359195.1	5982388	-0.07143	0.03877	-0.07656	0.05449	-0.09272	0.05461
31996	OX359195.1	5989025	0.02840	0.03862	0.00730	0.05271	0.02913	0.05282
32008	OX359195.1	6002191	0.15493	0.03818	0.02386	0.04906	-0.01533	0.04928
32034	OX359195.1	6124812	0.05376	0.04397	0.00354	0.03649	-0.02158	0.04180
32037	OX359195.1	6128766	-0.01713	0.04451	0.00169	0.03701	-0.01652	0.04259
32053	OX359195.1	6164625	0.04712	0.05042	0.03849	0.04499	0.04541	0.05313
32061	OX359195.1	6167418	-0.02201	0.05097	0.00781	0.04586	0.07574	0.05421
32109	OX359195.1	6227230	-0.04062	0.06432	-0.13146	0.07125	-0.11650	0.08360
32128	OX359195.1	6255033	0.04063	0.07129	0.00235	0.08617	-0.00283	0.10004
32143	OX359195.1	6276002	0.33945	0.07660	0.12803	0.09774	0.13898	0.11258
32169	OX359195.1	6330232	0.03448	0.08821	0.11657	0.12690	0.11190	0.14301
32181	OX359195.1	6353737	-0.03279	0.09186	-0.03457	0.13743	-0.03496	0.15353
32184	OX359195.1	6360729	0.10687	0.09273	0.00699	0.14022	0.03883	0.15625
32203	OX359195.1	6383989	0.03870	0.09479	0.50856	0.14808	0.64052	0.16371
32217	OX359195.1	6415044	0.01848	0.09527	0.00221	0.15473	0.04215	0.16941
32242	OX359195.1	6459559	0.03620	0.09150	-0.00382	0.15649	-0.00189	0.16914
32244	OX359195.1	6459603	0.37014	0.09149	0.86903	0.15649	0.88263	0.16914
32253	OX359195.1	6481496	0.62899	0.08769	0.70936	0.15380	0.73424	0.16522
32256	OX359195.1	6488036	0.21250	0.08634	0.10203	0.15262	0.11067	0.16365
32272	OX359195.1	6508103	0.20896	0.08164	0.50148	0.14788	0.50779	0.15778
32273	OX359195.1	6508106	-0.05814	0.08164	-0.06139	0.14788	-0.06209	0.15778
32320	OX359195.1	6597759	-0.03996	0.05339	-0.08453	0.11273	-0.08538	0.11789
32325	OX359195.1	6609040	-0.02095	0.04949	0.08013	0.10736	0.08344	0.11208
32334	OX359195.1	6620889	-0.01752	0.04566	0.00173	0.10192	-0.04017	0.10614
32335	OX359195.1	6624715	-0.00322	0.04437	-0.00036	0.10006	0.00387	0.10416
32336	OX359195.1	6624718	-0.05581	0.04436	-0.05756	0.10006	-0.05796	0.10416
32355	OX359195.1	6643488	-0.01205	0.03815	0.22023	0.09095	0.22330	0.09455
32364	OX359195.1	6657079	-0.04961	0.03384	-0.03115	0.08440	-0.03321	0.08775
32367	OX359195.1	6657822	-0.04410	0.03361	-0.06057	0.08404	-0.07271	0.08738
32419	OX359195.1	6798313	0.06217	0.01076	0.00388	0.03429	-0.00329	0.04040
32442	OX359195.1	6846349	-0.07766	0.01546	-0.02823	0.03120	0.02055	0.03912
32459	OX359195.1	6878974	-0.02148	0.02199	-0.01932	0.03457	-0.00716	0.04328
32499	OX359195.1	6953500	0.19708	0.04194	0.20218	0.05242	0.26729	0.06088
32506	OX359195.1	6957899	-0.06061	0.04321	-0.06265	0.05377	-0.02957	0.06214
32508	OX359195.1	6962183	-0.05387	0.04437	-0.05253	0.05473	-0.05381	0.06301
32514	OX359195.1	6969870	-0.00195	0.04673	-0.03301	0.05732	-0.02669	0.06542
32542	OX359195.1	7012165	-0.02962	0.05889	-0.00767	0.07093	-0.01568	0.07788
32588	OX359195.1	7066111	0.33920	0.07150	0.36521	0.08535	0.31050	0.09093
32634	OX359195.1	7117228	0.03612	0.07799	0.02862	0.09228	0.02390	0.09708
32659	OX359195.1	7155136	0.07935	0.07829	0.05775	0.09189	0.06360	0.09642
32667	OX359195.1	7166935	0.01045	0.07768	0.03655	0.09084	0.03678	0.09534
32673	OX359195.1	7170303	0.21019	0.07744	0.44916	0.09046	0.45295	0.09495
32681	OX359195.1	7191874	0.33129	0.07525	0.33574	0.08711	0.34747	0.09164
32708	OX359195.1	7236128	0.13253	0.06745	0.04183	0.07607	0.03324	0.08063
32713	OX359195.1	7246216	0.05882	0.06522	0.06207	0.07297	0.04580	0.07753
32721	OX359195.1	7253830	-0.06780	0.06344	-0.07264	0.07056	0.03445	0.07513
32735	OX359195.1	7267372	0.15328	0.06011	0.15261	0.06597	0.11452	0.07052
32736	OX359195.1	7271474	-0.04639	0.05907	-0.06806	0.06454	-0.05364	0.06909
32782	OX359195.1	7400709	-0.03554	0.02819	-0.03053	0.02289	-0.02881	0.02658
32789	OX359195.1	7407336	-0.05692	0.02691	-0.04260	0.02127	-0.04249	0.02488
32792	OX359195.1	7410031	-0.05814	0.02655	-0.06139	0.02078	-0.06209	0.02434
32816	OX359195.1	7446049	-0.05166	0.02202	-0.02588	0.01492	-0.01533	0.01826
32825	OX359195.1	7450086	-0.08434	0.02163	-0.09142	0.01442	-0.08566	0.01774
32829	OX359195.1	7458567	0.18089	0.02090	0.02532	0.01349	0.02055	0.01678
32861	OX359195.1	7512753	0.19344	0.01859	0.17918	0.01064	0.18390	0.01408
32876	OX359195.1	7532973	-0.05581	0.01849	-0.05756	0.01055	-0.05796	0.01419
32883	OX359195.1	7542690	0.07089	0.01870	0.07323	0.01079	0.06088	0.01454
32891	OX359195.1	7549221	0.00592	0.01903	0.00063	0.01120	0.00332	0.01503
32919	OX359195.1	7595861	-0.04012	0.02176	-0.00962	0.01417	-0.01331	0.01887
32950	OX359195.1	7636860	-0.00457	0.02571	-0.00061	0.01799	0.05803	0.02385
32954	OX359195.1	7641106	0.07935	0.02623	0.05775	0.01852	0.06360	0.02451
32956	OX359195.1	7644911	-0.03967	0.02647	-0.00273	0.01875	-0.03803	0.02487
32964	OX359195.1	7656251	-0.05814	0.02800	-0.06139	0.02027	-0.06209	0.02679
33017	OX359195.1	7778754	-0.06128	0.04659	-0.05696	0.03819	0.03530	0.05024
33023	OX359195.1	7785208	-0.05420	0.04742	-0.05438	0.03904	-0.06325	0.05140
33025	OX359195.1	7789411	0.21250	0.04794	0.10203	0.03957	0.11067	0.05214
33059	OX359195.1	7826847	0.49367	0.05158	0.51092	0.04364	0.45162	0.05794
33073	OX359195.1	7855403	-0.02932	0.05314	-0.02899	0.04584	-0.01317	0.06134
33074	OX359195.1	7855406	-0.00202	0.05314	-0.00102	0.04584	-0.00545	0.06134
33107	OX359195.1	7922808	-0.07143	0.05165	-0.07656	0.04764	-0.03859	0.06483
33113	OX359195.1	7927798	0.15331	0.05124	0.12870	0.04753	0.13482	0.06476
33126	OX359195.1	7948908	-0.04466	0.04914	-0.06297	0.04680	0.07193	0.06404
33149	OX359195.1	7996006	0.16957	0.04368	0.22874	0.04510	0.23729	0.06141
33164	OX359195.1	8080067	-0.05814	0.03321	-0.06139	0.04508	-0.06209	0.05631
33174	OX359195.1	8104012	0.01405	0.03190	0.01465	0.04814	0.01345	0.05739
33214	OX359195.1	8172109	-0.04825	0.03765	-0.03441	0.07105	-0.04470	0.07448
33215	OX359195.1	8172112	0.01405	0.03765	0.01465	0.07105	0.01345	0.07448
33255	OX359195.1	8273468	-0.04116	0.08324	-0.02831	0.15570	-0.06335	0.15316
33281	OX359195.1	8363761	0.14091	0.15553	0.58933	0.26423	0.59397	0.26082
33301	OX359195.1	8411988	0.52703	0.19827	0.48410	0.32162	0.48980	0.31854
33325	OX359196.1	78221	-0.07463	-0.01435	-0.08039	-0.02037	-0.08905	-0.02288
33346	OX359196.1	171609	-0.03279	-0.00882	-0.01551	-0.01049	-0.01286	-0.01188
33369	OX359196.1	223157	0.07368	-0.00646	0.03138	-0.00442	0.01433	-0.00502
33376	OX359196.1	229082	0.01597	-0.00622	0.00963	-0.00370	0.01428	-0.00420
33390	OX359196.1	251344	0.03612	-0.00515	0.02862	-0.00080	0.02390	-0.00086
33391	OX359196.1	255782	-0.05841	-0.00498	-0.15511	-0.00025	-0.15594	-0.00021
33403	OX359196.1	278316	-0.04961	-0.00386	-0.03115	0.00280	-0.03321	0.00330
33416	OX359196.1	302689	-0.02457	-0.00292	-0.02193	0.00580	-0.02477	0.00685
33423	OX359196.1	313698	-0.03279	-0.00257	-0.01551	0.00705	-0.01286	0.00839
33424	OX359196.1	313701	-0.05581	-0.00257	-0.05756	0.00705	-0.05796	0.00839
33459	OX359196.1	400246	-0.03014	-0.00029	0.00891	0.01460	0.00389	0.01825
33464	OX359196.1	406287	-0.00457	-0.00014	-0.00061	0.01486	-0.01733	0.01867
33465	OX359196.1	406290	0.23398	-0.00014	0.35665	0.01486	0.36212	0.01867
33471	OX359196.1	433636	-0.01259	0.00038	0.09004	0.01556	0.09812	0.02005
33478	OX359196.1	452137	-0.00555	0.00080	-0.00591	0.01563	0.05141	0.02053
33508	OX359196.1	556118	-0.05814	0.00546	-0.06139	0.01259	-0.06209	0.01848
33519	OX359196.1	565394	-0.05692	0.00611	-0.04260	0.01230	-0.04249	0.01816
33530	OX359196.1	586513	-0.04574	0.00770	-0.08453	0.01177	-0.08538	0.01749
33536	OX359196.1	602326	-0.01806	0.00891	0.00579	0.01145	0.05316	0.01703
33539	OX359196.1	605726	-0.05692	0.00918	-0.04260	0.01141	-0.04249	0.01695
33584	OX359196.1	665738	-0.05814	0.01416	-0.06139	0.01126	-0.06209	0.01600
33591	OX359196.1	685261	-0.04682	0.01549	-0.05174	0.01128	-0.03409	0.01577
33596	OX359196.1	692809	0.23592	0.01599	0.21946	0.01131	0.22495	0.01569
33614	OX359196.1	721897	0.30135	0.01768	0.25556	0.01149	0.25018	0.01543
33636	OX359196.1	737500	0.00612	0.01843	-0.00626	0.01147	-0.00834	0.01517
33640	OX359196.1	739813	-0.08108	0.01852	-0.08012	0.01145	-0.11806	0.01513
33642	OX359196.1	739840	-0.03967	0.01852	-0.00273	0.01145	0.05791	0.01513
33646	OX359196.1	743031	0.15414	0.01871	0.07437	0.01149	0.03253	0.01509
33657	OX359196.1	755148	0.00802	0.01917	0.00762	0.01142	0.01011	0.01485
33662	OX359196.1	758698	-0.01519	0.01927	-0.02968	0.01138	-0.03448	0.01476
33663	OX359196.1	758701	-0.03616	0.01927	-0.02452	0.01138	0.00433	0.01476
33713	OX359196.1	850657	0.02371	0.01901	-0.00305	0.00828	0.01545	0.01042
33715	OX359196.1	854760	0.01235	0.01888	0.01010	0.00806	-0.02016	0.01016
33729	OX359196.1	869090	-0.05814	0.01829	-0.06139	0.00708	-0.06209	0.00910
33806	OX359196.1	1044559	-0.05692	0.00882	-0.04260	0.00375	-0.04249	0.00621
33822	OX359196.1	1074882	0.18089	0.00707	0.02532	0.00479	0.02055	0.00772
33839	OX359196.1	1093739	0.04872	0.00605	0.03667	0.00557	0.04306	0.00888
33868	OX359196.1	1124920	-0.07843	0.00461	-0.08410	0.00694	-0.02107	0.01102
33878	OX359196.1	1170377	-0.02718	0.00316	0.12074	0.00909	0.08722	0.01442
33886	OX359196.1	1190945	0.13125	0.00267	0.11102	0.00988	0.06962	0.01587
33914	OX359196.1	1217080	-0.04494	0.00234	-0.04828	0.01084	-0.06383	0.01767
33918	OX359196.1	1219126	-0.02457	0.00233	-0.02193	0.01091	-0.02477	0.01780
33923	OX359196.1	1224252	-0.04012	0.00231	-0.00962	0.01108	-0.01331	0.01813
33924	OX359196.1	1224255	-0.05387	0.00231	-0.05253	0.01108	-0.05381	0.01813
33940	OX359196.1	1241417	-0.05644	0.00230	-0.03731	0.01160	-0.03743	0.01918
33999	OX359196.1	1315337	0.07927	0.00315	0.08089	0.01309	0.18765	0.02232
34004	OX359196.1	1329431	-0.01896	0.00354	-0.00116	0.01337	0.07045	0.02273
34005	OX359196.1	1330438	0.06468	0.00356	0.17918	0.01338	0.18390	0.02275
34027	OX359196.1	1369788	0.09091	0.00473	0.02778	0.01420	0.00729	0.02345
34030	OX359196.1	1373429	-0.06445	0.00488	-0.05505	0.01446	-0.03415	0.02369
34077	OX359196.1	1437631	0.17977	0.00736	0.16739	0.01705	0.16335	0.02466
34079	OX359196.1	1438648	-0.08434	0.00740	-0.09142	0.01711	-0.08566	0.02468
34085	OX359196.1	1463339	-0.07143	0.00905	-0.07656	0.01937	-0.03859	0.02593
34087	OX359196.1	1466463	-0.03410	0.00921	-0.06376	0.01964	-0.06257	0.02607
34095	OX359196.1	1477430	-0.05814	0.00982	-0.06139	0.02067	-0.06209	0.02661
34108	OX359196.1	1503603	-0.05814	0.01140	-0.06139	0.02361	-0.06209	0.02835
34165	OX359196.1	1604969	0.28984	0.01974	0.42801	0.04152	0.42557	0.04218
34166	OX359196.1	1604972	0.16237	0.01974	0.13194	0.04152	0.09326	0.04218
34169	OX359196.1	1606090	-0.03996	0.01986	-0.02076	0.04177	-0.02708	0.04241
34180	OX359196.1	1616199	-0.04961	0.02097	-0.03115	0.04413	-0.03321	0.04451
34192	OX359196.1	1643218	-0.05387	0.02416	-0.05253	0.05074	-0.05381	0.05066
34201	OX359196.1	1696181	-0.05814	0.03266	-0.06139	0.06584	-0.06209	0.06535
34222	OX359196.1	1734907	-0.05814	0.04026	-0.06139	0.07705	-0.06209	0.07659
34257	OX359196.1	1790986	-0.05814	0.05222	-0.06139	0.09094	-0.06209	0.09041
34268	OX359196.1	1805521	0.08735	0.05516	0.28673	0.09359	0.29364	0.09313
34284	OX359196.1	1821567	0.04834	0.05812	0.26057	0.09594	0.28925	0.09549
34324	OX359196.1	1889247	0.52892	0.06520	0.54866	0.09655	0.54984	0.09558
34352	OX359196.1	1907927	-0.04961	0.06477	-0.03115	0.09355	-0.03321	0.09240
34384	OX359196.1	1957012	0.27103	0.05978	0.17119	0.08160	0.15194	0.08014
34393	OX359196.1	1967756	-0.05581	0.05764	-0.05756	0.07799	-0.05796	0.07653
34426	OX359196.1	2027306	-0.02167	0.04144	-0.01327	0.05498	-0.03399	0.05423
34428	OX359196.1	2029780	0.09692	0.04067	0.08023	0.05400	0.06206	0.05330
34432	OX359196.1	2034679	0.05627	0.03915	0.04339	0.05205	0.04541	0.05147
34456	OX359196.1	2070672	-0.05644	0.02779	-0.03731	0.03810	-0.03743	0.03866
34481	OX359196.1	2105261	-0.07790	0.01815	-0.01609	0.02699	-0.01894	0.02890
34535	OX359196.1	2192165	-0.04961	0.00523	-0.03115	0.01399	-0.03321	0.01930
34554	OX359196.1	2235531	-0.07623	0.00534	-0.08139	0.01508	-0.09274	0.02155
34559	OX359196.1	2238086	-0.06321	0.00546	-0.05047	0.01529	-0.05236	0.02181
34574	OX359196.1	2247386	0.01857	0.00605	0.00126	0.01624	0.09077	0.02293
34595	OX359196.1	2266670	0.02368	0.00754	0.02476	0.01850	0.06243	0.02547
34610	OX359196.1	2310688	-0.02457	0.01292	-0.02193	0.02714	-0.02477	0.03440
34615	OX359196.1	2315490	-0.01192	0.01363	0.04841	0.02834	0.05183	0.03561
34621	OX359196.1	2329484	0.08462	0.01583	0.08452	0.03212	0.08198	0.03940
34636	OX359196.1	2347542	-0.04961	0.01855	-0.03115	0.03726	-0.03321	0.04451
34640	OX359196.1	2349868	-0.07843	0.01898	-0.08410	0.03804	-0.07729	0.04528
34653	OX359196.1	2376856	0.30135	0.02428	0.25556	0.04800	0.25018	0.05511
34676	OX359196.1	2421029	-0.03435	0.03375	-0.00185	0.06801	0.00662	0.07481
34679	OX359196.1	2439700	0.00189	0.03819	0.00022	0.07795	-0.01331	0.08459
34687	OX359196.1	2475460	-0.03435	0.04703	-0.00185	0.09904	0.00662	0.10537
34688	OX359196.1	2475463	0.09661	0.04703	0.00664	0.09904	0.06323	0.10537
34723	OX359196.1	2591658	0.17977	0.07691	0.16739	0.17568	0.16335	0.18144
34726	OX359196.1	2593166	0.20253	0.07723	100000	0.17652	100000	0.18228
34729	OX359196.1	2596586	0.02630	0.07795	0.08897	0.17841	0.04801	0.18416
34782	OX359196.1	2684650	0.14528	0.08679	0.14109	0.20087	0.19273	0.20650
34830	OX359196.1	2902476	0.00592	0.03012	0.00063	0.06012	0.00332	0.05585
34835	OX359196.1	2904510	-0.05692	0.02976	-0.04260	0.05924	-0.04249	0.05486
34850	OX359196.1	2968602	0.04106	0.02198	0.00949	0.04057	-0.01279	0.03311
34861	OX359196.1	2995759	0.07368	0.02029	0.13037	0.03676	0.10608	0.02848
34940	OX359196.1	3336484	-0.03435	0.00949	-0.00185	0.01294	0.00662	0.02058
34948	OX359196.1	3359008	-0.02453	0.01544	-0.00133	0.01725	0.00691	0.02494
34952	OX359196.1	3374933	-0.03659	0.02004	-0.00193	0.02068	-0.01336	0.02830
34971	OX359196.1	3413037	-0.08003	0.03279	-0.17134	0.03045	-0.12344	0.03769
34985	OX359196.1	3462385	0.08462	0.05293	0.08452	0.04632	0.08198	0.05272
34992	OX359196.1	3486141	-0.02212	0.06365	-0.00127	0.05484	0.02957	0.06069
34994	OX359196.1	3489639	-0.06751	0.06527	-0.03020	0.05612	-0.04070	0.06190
35023	OX359196.1	3565810	0.45232	0.09999	0.34280	0.08315	0.33643	0.08692
35043	OX359196.1	3642662	-0.04605	0.12656	-0.00491	0.10224	-0.00617	0.10426
35057	OX359196.1	3701585	0.09401	0.13420	0.14385	0.10580	0.14810	0.10697
35068	OX359196.1	3720341	0.45232	0.13373	0.34280	0.10457	0.33643	0.10556
35073	OX359196.1	3728337	0.03612	0.13255	0.02862	0.10324	0.02390	0.10418
35109	OX359196.1	3775736	0.23211	0.12247	0.03874	0.09329	0.05288	0.09399
35159	OX359196.1	3863129	0.14837	0.08187	0.15497	0.05890	0.15638	0.05923
35212	OX359196.1	3941184	-0.02457	0.03673	-0.02193	0.02224	-0.02477	0.02236
35213	OX359196.1	3941187	-0.05814	0.03672	-0.06139	0.02224	-0.06209	0.02235
35282	OX359196.1	4035212	-0.03659	-0.00107	-0.00272	-0.00888	-0.01840	-0.00902
35295	OX359196.1	4056172	0.01150	-0.00541	0.00129	-0.01271	0.01434	-0.01291
35307	OX359196.1	4067586	-0.02662	-0.00730	-0.04587	-0.01445	-0.04530	-0.01468
35356	OX359196.1	4176133	-0.05814	-0.00876	-0.06139	-0.01761	-0.06209	-0.01784
35359	OX359196.1	4178114	-0.04970	-0.00855	-0.05101	-0.01747	-0.04058	-0.01769
35385	OX359196.1	4219475	-0.05166	-0.00238	-0.02588	-0.01325	-0.01533	-0.01294
35389	OX359196.1	4227130	-0.05936	-0.00120	-0.04467	-0.01230	-0.07411	-0.01189
35402	OX359196.1	4250170	-0.03279	0.00341	-0.03457	-0.00897	-0.03496	-0.00813
35406	OX359196.1	4254599	0.14621	0.00437	0.01771	-0.00827	0.01266	-0.00733
35421	OX359196.1	4299605	-0.03791	0.01528	0.00262	-0.00011	0.00555	0.00213
35425	OX359196.1	4301908	-0.04195	0.01590	-0.00269	0.00036	-0.01363	0.00267
35462	OX359196.1	4351529	-0.03365	0.03067	-0.06376	0.01148	-0.06257	0.01594
35502	OX359196.1	4414530	0.11111	0.05179	0.11765	0.02745	0.14508	0.03571
35509	OX359196.1	4425074	0.11194	0.05532	0.07959	0.03009	0.06275	0.03905
35512	OX359196.1	4425911	0.16824	0.05561	0.02466	0.03031	-0.00565	0.03932
35532	OX359196.1	4454252	-0.01496	0.06499	-0.00174	0.03724	0.06658	0.04824
35552	OX359196.1	4485184	0.07935	0.07456	0.05775	0.04419	0.06360	0.05751
35565	OX359196.1	4508145	-0.05814	0.08108	-0.06139	0.04880	-0.06209	0.06375
35598	OX359196.1	4574639	0.14837	0.09360	0.15497	0.05705	0.15638	0.07566
35608	OX359196.1	4587078	0.35358	0.09464	0.29931	0.05756	0.30935	0.07659
35619	OX359196.1	4601680	0.10613	0.09526	0.04656	0.05769	0.08660	0.07710
35641	OX359196.1	4644389	0.26241	0.09386	0.04017	0.05569	0.17460	0.07530
35657	OX359196.1	4662953	0.13731	0.09131	0.12223	0.05342	0.17189	0.07270
35702	OX359196.1	4716088	-0.04961	0.08043	-0.03115	0.04498	-0.03321	0.06223
35739	OX359196.1	4771393	-0.00322	0.06727	-0.00492	0.03607	-0.01138	0.05039
35740	OX359196.1	4774218	0.35115	0.06652	0.20475	0.03562	0.16279	0.04977
35758	OX359196.1	4803908	-0.04961	0.06064	-0.03115	0.03243	-0.03321	0.04507
35800	OX359196.1	4865797	-0.04980	0.05676	-0.05189	0.03407	-0.07282	0.04451
35817	OX359196.1	4882803	-0.02321	0.05780	-0.06470	0.03668	-0.07520	0.04684
35833	OX359196.1	4898217	-0.05167	0.05974	-0.05381	0.03988	-0.06690	0.04979
35844	OX359196.1	4910926	-0.06780	0.06193	-0.07264	0.04307	0.03445	0.05278
35861	OX359196.1	4934188	0.06026	0.06686	0.03583	0.04987	0.04341	0.05941
35911	OX359196.1	5016795	0.15331	0.08910	0.12870	0.07848	0.13482	0.08777
35937	OX359196.1	5076071	0.36364	0.10052	0.26519	0.09395	0.27386	0.10283
35947	OX359196.1	5107189	0.04834	0.10358	0.03218	0.09888	0.04215	0.10737
35952	OX359196.1	5115429	0.16624	0.10398	0.22674	0.09968	0.22512	0.10808
35968	OX359196.1	5135998	0.11090	0.10457	0.11810	0.10112	0.12156	0.10933
35998	OX359196.1	5179743	0.18532	0.10340	0.37525	0.10112	0.47154	0.10886
36001	OX359196.1	5183823	0.33131	0.10312	0.24829	0.10091	0.22371	0.10861
36014	OX359196.1	5214224	-0.03581	0.10042	-0.03944	0.09851	-0.04470	0.10589
36020	OX359196.1	5222225	-0.03554	0.09965	-0.03053	0.09774	-0.02881	0.10506
36027	OX359196.1	5232468	-0.05581	0.09829	-0.05756	0.09641	-0.05796	0.10367
36038	OX359196.1	5253662	-0.05313	0.09553	-0.11036	0.09337	-0.11266	0.10045
36061	OX359196.1	5290643	0.35044	0.09033	0.35553	0.08708	0.35424	0.09400
36158	OX359196.1	5469076	0.04816	0.07473	0.00836	0.05851	0.02597	0.06703
36159	OX359196.1	5473322	-0.05814	0.07510	-0.06139	0.05856	-0.06209	0.06705
36226	OX359196.1	5564299	0.03175	0.09487	0.03120	0.07619	0.08250	0.08334
36276	OX359196.1	5623869	0.12583	0.11011	0.01665	0.09340	0.01020	0.09846
36302	OX359196.1	5705482	0.32625	0.11913	0.32442	0.10685	0.32862	0.10962
36323	OX359196.1	5739184	-0.05692	0.11635	-0.04260	0.10562	-0.04249	0.10799
36324	OX359196.1	5739187	0.05627	0.11635	0.04339	0.10562	0.04357	0.10799
36325	OX359196.1	5741015	0.07003	0.11580	0.07096	0.10513	0.07329	0.10749
36345	OX359196.1	5767037	0.56721	0.11136	0.58427	0.10183	0.54936	0.10425
36394	OX359196.1	5864188	0.01150	0.08259	0.00129	0.07490	0.01434	0.08019
36424	OX359196.1	5919748	0.01594	0.06393	-0.02276	0.05623	-0.03806	0.06476
36442	OX359196.1	5943993	-0.01896	0.05745	-0.00116	0.04963	0.07045	0.05977
36443	OX359196.1	5943996	-0.04980	0.05745	-0.05189	0.04963	-0.08382	0.05977
36499	OX359196.1	6029801	0.01150	0.04598	0.00129	0.03853	0.01434	0.05378
36552	OX359196.1	6105695	-0.03718	0.04900	-0.03271	0.04374	-0.01320	0.06122
36566	OX359196.1	6134239	0.03378	0.05155	0.00205	0.04744	0.00942	0.06503
36572	OX359196.1	6147175	0.34026	0.05276	0.28947	0.04922	0.40017	0.06670
36583	OX359196.1	6170383	-0.05958	0.05472	-0.11769	0.05219	-0.13835	0.06935
36613	OX359196.1	6216115	-0.05109	0.06055	0.06207	0.05964	0.08749	0.07533
36623	OX359196.1	6235951	0.09751	0.06276	0.15051	0.06220	0.17695	0.07705
36628	OX359196.1	6240408	0.19077	0.06341	0.14941	0.06292	0.12975	0.07754
36666	OX359196.1	6314818	-0.03279	0.07791	-0.01551	0.07569	-0.01286	0.08566
36705	OX359196.1	6383843	0.09210	0.09903	0.09724	0.08915	0.09754	0.09344
36810	OX359196.1	6552779	0.30135	0.13579	0.25556	0.10613	0.25018	0.10058
36815	OX359196.1	6555459	0.21250	0.13585	0.10203	0.10606	0.11067	0.10043
36834	OX359196.1	6590741	0.03612	0.13525	0.02862	0.10409	0.02390	0.09756
36850	OX359196.1	6613381	0.01405	0.13344	0.01465	0.10178	0.01345	0.09473
36860	OX359196.1	6632206	0.15392	0.13163	0.09189	0.09971	0.02850	0.09241
36864	OX359196.1	6634682	0.01597	0.13132	0.00963	0.09937	0.01428	0.09204
36870	OX359196.1	6636827	0.31471	0.13105	0.29448	0.09907	0.27320	0.09171
36873	OX359196.1	6639901	0.23052	0.13064	0.23578	0.09863	0.24319	0.09124
36899	OX359196.1	6678173	0.08587	0.12423	0.00622	0.09202	0.01255	0.08432
36949	OX359196.1	6780430	-0.07383	0.09538	-0.06776	0.06546	-0.11266	0.05896
36952	OX359196.1	6789083	0.17232	0.09225	0.06456	0.06273	0.04215	0.05651
37000	OX359196.1	6888758	0.02703	0.06165	0.00395	0.04194	0.04341	0.04105
37019	OX359196.1	6930643	-0.04961	0.05664	-0.02211	0.04258	-0.01998	0.04425
37070	OX359196.1	7023451	0.01792	0.06741	0.01103	0.06798	0.02165	0.07355
37073	OX359196.1	7023783	0.03486	0.06749	0.02233	0.06812	0.04341	0.07369
37080	OX359196.1	7033944	0.09630	0.07006	0.04096	0.07226	0.00835	0.07811
37104	OX359196.1	7091546	0.01150	0.08449	0.00129	0.09527	0.01434	0.10233
37167	OX359196.1	7204472	0.17977	0.09841	0.16739	0.11828	0.16335	0.12598
37194	OX359196.1	7240774	0.31156	0.09707	0.30067	0.11744	0.38474	0.12521
37197	OX359196.1	7242276	0.32893	0.09696	0.32399	0.11732	0.35154	0.12509
37202	OX359196.1	7246042	-0.05814	0.09667	-0.06139	0.11700	-0.06209	0.12476
37210	OX359196.1	7251404	0.26850	0.09622	0.65535	0.11649	0.65612	0.12424
37223	OX359196.1	7282670	-0.08434	0.09268	-0.09142	0.11245	-0.12963	0.12011
37237	OX359196.1	7300431	0.13125	0.09018	0.11102	0.10939	0.06356	0.11698
37241	OX359196.1	7307539	0.22078	0.08909	0.11565	0.10805	0.12264	0.11560
37266	OX359196.1	7327810	-0.03279	0.08574	-0.00747	0.10384	-0.00996	0.11124
37276	OX359196.1	7356340	0.03612	0.08060	0.02862	0.09741	0.02390	0.10454
37283	OX359196.1	7364822	0.00802	0.07898	0.00762	0.09539	0.01011	0.10242
37297	OX359196.1	7378637	0.01109	0.07628	0.05695	0.09204	0.05141	0.09889
37302	OX359196.1	7379431	0.26003	0.07612	0.15434	0.09184	0.28910	0.09868
37324	OX359196.1	7414315	-0.05499	0.06887	-0.00699	0.08296	-0.03022	0.08915
37325	OX359196.1	7414318	-0.03435	0.06887	-0.00185	0.08296	0.00662	0.08915
37368	OX359196.1	7551265	-0.04349	0.03990	-0.03731	0.05673	-0.04465	0.05715
37371	OX359196.1	7555937	0.11392	0.03900	0.03805	0.05637	0.00000	0.05651
37435	OX359196.1	7721076	-0.01988	0.02502	0.20809	0.07414	0.20701	0.06796
37466	OX359196.1	7776256	0.05376	0.02818	0.00354	0.08688	-0.02158	0.08120
37503	OX359196.1	7830689	0.03612	0.03145	0.02862	0.09805	0.02390	0.09289
37511	OX359196.1	7837577	0.01150	0.03186	0.00129	0.09928	0.01434	0.09423
37517	OX359196.1	7848788	-0.00334	0.03246	-0.02276	0.10119	-0.03806	0.09631
37555	OX359196.1	7951282	0.05842	0.03438	0.20451	0.11170	0.20635	0.10779
37559	OX359196.1	7960734	0.11854	0.03416	0.56419	0.11181	0.56455	0.10795
37569	OX359196.1	7990264	0.08462	0.03305	0.08452	0.11109	0.08198	0.10731
37580	OX359196.1	8029198	0.01597	0.03059	0.00963	0.10773	0.01428	0.10404
37591	OX359196.1	8046064	-0.02888	0.02919	-0.00931	0.10529	-0.03694	0.10158
37613	OX359196.1	8117813	-0.05814	0.02131	-0.06139	0.08989	-0.06209	0.08607
37647	OX359197.1	121709	0.03612	0.10283	0.02862	0.12570	0.02390	0.13995
37656	OX359197.1	143895	0.13460	0.10122	0.09215	0.12477	0.08559	0.13966
37658	OX359197.1	145321	0.24039	0.10097	0.22899	0.12456	0.22575	0.13947
37665	OX359197.1	161654	0.14466	0.09969	0.23587	0.12374	0.23414	0.13905
37672	OX359197.1	190138	-0.00539	0.09767	0.07402	0.12256	0.07767	0.13844
37685	OX359197.1	214775	0.19296	0.09598	0.02588	0.12145	0.05797	0.13783
37686	OX359197.1	214778	0.14013	0.09598	0.28237	0.12145	0.28023	0.13783
37714	OX359197.1	253476	0.04305	0.09370	0.07490	0.12005	0.22969	0.13693
37722	OX359197.1	259063	0.11190	0.09342	0.28338	0.11989	0.28251	0.13683
37723	OX359197.1	264823	0.09143	0.09314	0.13760	0.11974	0.16869	0.13673
37732	OX359197.1	284610	0.03097	0.09217	0.04551	0.11925	0.10714	0.13643
37757	OX359197.1	327862	0.03612	0.09085	0.02862	0.11895	0.02390	0.13644
37772	OX359197.1	351164	0.07935	0.09046	0.05775	0.11918	0.06360	0.13685
37788	OX359197.1	370453	-0.06128	0.09027	-0.05696	0.11952	-0.07699	0.13740
37795	OX359197.1	372648	-0.05814	0.09026	-0.06139	0.11956	-0.06209	0.13747
37800	OX359197.1	374967	0.24870	0.09024	0.24732	0.11961	0.22680	0.13755
37812	OX359197.1	393025	-0.05018	0.09012	-0.16542	0.12002	-0.14203	0.13822
37840	OX359197.1	439571	0.33245	0.08910	0.62250	0.12032	0.63891	0.13952
37879	OX359197.1	532655	0.48107	0.08064	0.50255	0.11355	0.64019	0.13635
37920	OX359197.1	580491	0.01150	0.07122	0.00129	0.10406	0.01434	0.12905
37930	OX359197.1	594845	-0.04961	0.06772	-0.03115	0.10047	-0.03321	0.12605
37940	OX359197.1	610003	-0.02457	0.06347	-0.02193	0.09591	-0.02477	0.12198
37954	OX359197.1	632343	0.11439	0.05741	0.23929	0.08927	0.19840	0.11599
37979	OX359197.1	662136	0.03908	0.04902	0.00539	0.07987	0.15612	0.10715
38013	OX359197.1	725327	0.01060	0.03069	0.16969	0.05798	0.22360	0.08514
38018	OX359197.1	730660	0.01191	0.02938	-0.02097	0.05615	-0.01138	0.08320
38085	OX359197.1	852988	-0.03279	0.00752	-0.03457	0.02173	-0.03496	0.04447
38103	OX359197.1	874103	-0.04911	0.00693	-0.05156	0.01821	-0.04686	0.03982
38188	OX359197.1	1011579	0.06564	0.01909	0.13526	0.01694	0.27159	0.03060
38205	OX359197.1	1057267	-0.05692	0.02425	-0.04260	0.02086	-0.04249	0.03217
38206	OX359197.1	1057270	-0.03279	0.02425	-0.03457	0.02086	-0.03496	0.03217
38222	OX359197.1	1092123	0.03378	0.02726	0.00205	0.02395	0.00942	0.03358
38228	OX359197.1	1116395	-0.03941	0.02879	-0.03652	0.02585	-0.03872	0.03429
38232	OX359197.1	1123137	0.10320	0.02916	0.01511	0.02642	0.05528	0.03458
38242	OX359197.1	1143566	0.04063	0.03005	0.00235	0.02806	-0.00283	0.03544
38249	OX359197.1	1151292	0.11537	0.03030	0.08836	0.02865	0.09804	0.03576
38255	OX359197.1	1152586	0.01597	0.03034	0.00963	0.02875	0.01428	0.03581
38276	OX359197.1	1178680	0.11398	0.03081	0.01592	0.03052	0.00948	0.03671
38298	OX359197.1	1214230	0.17674	0.03088	0.36362	0.03293	0.26650	0.03816
38308	OX359197.1	1224439	0.08861	0.03067	0.02373	0.03348	0.01060	0.03849
38315	OX359197.1	1229243	-0.07725	0.03055	-0.03489	0.03371	-0.03448	0.03863
38320	OX359197.1	1235755	-0.05272	0.03036	-0.02201	0.03401	0.06086	0.03881
38401	OX359197.1	1358355	0.01059	0.02412	0.14478	0.03533	0.13628	0.03888
38410	OX359197.1	1372864	-0.03279	0.02358	-0.03457	0.03502	-0.03496	0.03844
38411	OX359197.1	1372867	0.02648	0.02358	0.00170	0.03502	0.02373	0.03844
38465	OX359197.1	1500248	0.00915	0.03004	0.08121	0.03560	0.16195	0.03495
38469	OX359197.1	1504150	-0.05437	0.03057	-0.04282	0.03583	-0.03538	0.03494
38494	OX359197.1	1529871	-0.06565	0.03456	-0.05186	0.03779	-0.08203	0.03520
38501	OX359197.1	1540496	0.16502	0.03628	0.26111	0.03870	0.26401	0.03531
38505	OX359197.1	1544410	-0.02914	0.03694	-0.20619	0.03911	-0.21777	0.03540
38555	OX359197.1	1637971	0.29437	0.05291	0.22238	0.04991	0.17994	0.03758
38606	OX359197.1	1731871	-0.00741	0.06100	0.06861	0.05537	0.02200	0.03642
38628	OX359197.1	1767961	0.04566	0.06051	0.04218	0.05361	0.00681	0.03435
38697	OX359197.1	1895052	-0.08108	0.04845	-0.04318	0.03680	-0.07218	0.02530
38720	OX359197.1	1920159	0.45752	0.04532	0.47833	0.03345	0.41884	0.02390
38727	OX359197.1	1935958	-0.01561	0.04327	-0.12985	0.03154	-0.12903	0.02314
38731	OX359197.1	1937217	-0.03279	0.04310	-0.01551	0.03139	-0.01286	0.02309
38776	OX359197.1	2016531	0.19794	0.03254	0.09884	0.02578	0.08226	0.02233
38777	OX359197.1	2016534	-0.03597	0.03254	-0.03660	0.02578	-0.01036	0.02233
38801	OX359197.1	2069119	0.01848	0.02616	0.00221	0.02529	0.03475	0.02391
38806	OX359197.1	2080313	-0.03554	0.02498	-0.03053	0.02555	-0.02881	0.02451
38823	OX359197.1	2115720	-0.05814	0.02170	-0.06139	0.02695	-0.06209	0.02684
38833	OX359197.1	2142152	0.05627	0.02026	0.04339	0.02873	0.02465	0.02917
38877	OX359197.1	2221132	0.03656	0.02053	0.20801	0.03557	0.21136	0.03745
38883	OX359197.1	2225174	-0.03581	0.02072	-0.04096	0.03593	-0.04312	0.03787
38887	OX359197.1	2236865	0.01639	0.02154	0.01575	0.03710	-0.01726	0.03921
38894	OX359197.1	2239011	-0.06667	0.02169	-0.05590	0.03729	-0.05344	0.03943
38900	OX359197.1	2250769	0.19651	0.02247	0.28673	0.03823	0.29364	0.04056
38907	OX359197.1	2270579	-0.05692	0.02423	-0.04260	0.03981	-0.04249	0.04242
38924	OX359197.1	2314429	-0.03152	0.02914	-0.00423	0.04270	0.01197	0.04573
38926	OX359197.1	2323378	-0.04641	0.03028	-0.07085	0.04323	-0.06838	0.04632
38978	OX359197.1	2391138	-0.02453	0.03909	-0.00133	0.04533	0.00691	0.04847
38983	OX359197.1	2397367	-0.05692	0.03989	-0.04260	0.04539	-0.04249	0.04848
38994	OX359197.1	2408335	0.27032	0.04125	0.61905	0.04545	0.61828	0.04846
39000	OX359197.1	2416712	-0.04502	0.04226	-0.00254	0.04545	0.07407	0.04839
39017	OX359197.1	2432409	0.19794	0.04406	0.09884	0.04538	0.11067	0.04816
39018	OX359197.1	2432412	0.18089	0.04406	0.02532	0.04538	0.00698	0.04816
39038	OX359197.1	2462696	-0.01134	0.04717	-0.00720	0.04493	-0.00201	0.04736
39040	OX359197.1	2463110	-0.03616	0.04721	-0.02452	0.04492	0.00433	0.04734
39065	OX359197.1	2511391	0.21569	0.05093	0.03780	0.04381	-0.01589	0.04580
39090	OX359197.1	2539352	-0.05814	0.05255	-0.06139	0.04309	-0.06209	0.04495
39092	OX359197.1	2539446	0.10387	0.05255	0.10618	0.04308	0.05523	0.04495
39110	OX359197.1	2566199	0.13460	0.05364	0.09215	0.04243	0.08559	0.04432
39122	OX359197.1	2588957	-0.05814	0.05426	-0.06139	0.04189	-0.06209	0.04391
39128	OX359197.1	2593363	0.13460	0.05436	0.09215	0.04179	0.08559	0.04387
39148	OX359197.1	2632594	0.01057	0.05520	0.04746	0.04114	0.06830	0.04374
39170	OX359197.1	2658202	0.00592	0.05569	0.00063	0.04088	0.00332	0.04397
39180	OX359197.1	2683079	0.19877	0.05629	0.22674	0.04073	0.21959	0.04439
39182	OX359197.1	2683696	0.03612	0.05630	0.02862	0.04073	0.02390	0.04441
39191	OX359197.1	2693418	-0.03616	0.05662	-0.02452	0.04077	0.00433	0.04470
39195	OX359197.1	2694111	-0.00322	0.05663	-0.00036	0.04077	0.00387	0.04472
39206	OX359197.1	2710383	0.11486	0.05701	0.01596	0.04062	0.03537	0.04500
39216	OX359197.1	2731550	0.12583	0.05782	0.01665	0.04074	0.01020	0.04570
39222	OX359197.1	2742091	0.03612	0.05826	0.02862	0.04078	0.02390	0.04605
39248	OX359197.1	2771824	0.08220	0.05984	0.12096	0.04097	0.13127	0.04711
39250	OX359197.1	2774638	0.03612	0.06008	0.02862	0.04106	0.02390	0.04729
39254	OX359197.1	2779714	-0.02453	0.06032	-0.00133	0.04104	0.00691	0.04748
39258	OX359197.1	2782463	0.07003	0.06049	0.07096	0.04105	0.07329	0.04758
39272	OX359197.1	2800902	0.05882	0.06176	0.01538	0.04115	0.06305	0.04827
39320	OX359197.1	2894248	0.09181	0.07154	0.00898	0.04135	-0.00950	0.05164
39329	OX359197.1	2922614	0.10606	0.07596	0.10129	0.04169	0.17220	0.05292
39340	OX359197.1	2970145	0.16824	0.08283	0.02466	0.04149	0.03245	0.05437
39385	OX359197.1	3063629	0.16824	0.09347	0.02466	0.04034	0.01749	0.05608
39388	OX359197.1	3064129	0.05882	0.09351	0.06207	0.04033	0.07733	0.05608
39434	OX359197.1	3228410	-0.05461	0.10723	-0.03803	0.04893	0.06177	0.06499
39461	OX359197.1	3294378	0.03375	0.11822	0.00694	0.05553	-0.02825	0.07084
39465	OX359197.1	3297106	0.14110	0.11867	0.04932	0.05574	0.05660	0.07105
39485	OX359197.1	3361730	0.38462	0.12710	0.30864	0.05848	0.23979	0.07430
39499	OX359197.1	3442616	0.09661	0.12732	0.00664	0.05457	0.12030	0.07286
39514	OX359197.1	3483188	0.21569	0.12373	0.03780	0.05113	-0.00170	0.07070
39524	OX359197.1	3542770	0.04885	0.11643	0.03465	0.04712	0.14376	0.06858
39534	OX359197.1	3594242	0.00277	0.11122	0.00040	0.04644	-0.02326	0.06996
39542	OX359197.1	3613734	0.12583	0.10964	0.01665	0.04685	0.01020	0.07138
39544	OX359197.1	3626061	0.14364	0.10880	0.04604	0.04728	0.05190	0.07253
39566	OX359197.1	3753039	-0.07463	0.10343	-0.06329	0.05379	-0.03785	0.08878
39577	OX359197.1	3776856	0.28144	0.10229	0.18288	0.05440	0.12271	0.09101
39583	OX359197.1	3788442	0.22078	0.10178	0.11565	0.05461	0.05629	0.09197
39585	OX359197.1	3794920	0.10606	0.10147	0.10129	0.05469	0.17220	0.09242
39590	OX359197.1	3805178	0.34453	0.10093	0.16966	0.05473	0.23223	0.09300
39591	OX359197.1	3805181	0.01477	0.10093	-0.00492	0.05473	0.03296	0.09300
39601	OX359197.1	3834487	-0.02668	0.09879	-0.01343	0.05418	0.07755	0.09354
39605	OX359197.1	3846712	-0.04334	0.09777	-0.00560	0.05378	0.10166	0.09328
39617	OX359197.1	3873153	0.07089	0.09513	0.07323	0.05251	0.19962	0.09156
39650	OX359197.1	4003590	0.38462	0.07058	0.14894	0.03770	0.18117	0.06063
39693	OX359197.1	4100809	0.01597	0.05522	0.00963	0.03128	0.01428	0.03909
39695	OX359197.1	4102479	-0.03279	0.05510	-0.01551	0.03127	-0.01286	0.03889
39698	OX359197.1	4103555	0.02703	0.05502	0.02847	0.03127	0.01845	0.03876
39714	OX359197.1	4122120	-0.05814	0.05397	-0.06139	0.03152	-0.06209	0.03696
39763	OX359197.1	4193192	0.28662	0.05508	0.17455	0.03606	0.18367	0.03587
39773	OX359197.1	4199308	-0.04938	0.05550	-0.06160	0.03666	-0.06325	0.03611
39775	OX359197.1	4200001	-0.06128	0.05555	-0.00828	0.03673	-0.02986	0.03614
39781	OX359197.1	4206586	0.03486	0.05615	0.02233	0.03747	0.04341	0.03650
39789	OX359197.1	4212856	0.00189	0.05666	0.00022	0.03813	-0.01331	0.03683
39792	OX359197.1	4213530	0.01597	0.05672	0.00963	0.03820	0.01428	0.03687
39856	OX359197.1	4313605	0.24528	0.06752	0.22807	0.04919	0.15764	0.04432
39871	OX359197.1	4351289	0.14837	0.07067	0.15497	0.05167	0.15638	0.04632
39922	OX359197.1	4410878	0.13460	0.07159	0.09215	0.05153	0.08559	0.04641
39959	OX359197.1	4443894	0.05376	0.06958	0.00354	0.04926	0.00722	0.04467
39982	OX359197.1	4474365	0.07935	0.06586	0.05775	0.04587	0.06360	0.04197
40019	OX359197.1	4510480	0.07303	0.06149	0.02058	0.04207	-0.00039	0.03919
40029	OX359197.1	4525056	-0.05387	0.05936	-0.05253	0.04027	-0.05381	0.03785
40116	OX359197.1	4627881	0.01597	0.04860	0.00963	0.03363	0.01428	0.03511
40180	OX359197.1	4695050	0.03184	0.04890	0.08243	0.03642	0.13315	0.04045
40196	OX359197.1	4735432	-0.05814	0.05171	-0.06139	0.04016	-0.06209	0.04600
40198	OX359197.1	4752629	0.24063	0.05347	0.14457	0.04289	0.09302	0.04950
40300	OX359197.1	4913526	-0.03449	0.07286	-0.00930	0.07120	-0.01317	0.08376
40302	OX359197.1	4917838	-0.03554	0.07344	-0.03053	0.07210	-0.02881	0.08472
40311	OX359197.1	4940160	0.39402	0.07648	0.36794	0.07695	0.36975	0.08978
40327	OX359197.1	4962634	0.08547	0.07966	0.02034	0.08209	0.04215	0.09500
40330	OX359197.1	4968103	-0.08434	0.08039	-0.09142	0.08330	-0.11830	0.09619
40331	OX359197.1	4968106	0.05717	0.08039	0.04841	0.08330	0.05183	0.09619
40339	OX359197.1	4977254	-0.06780	0.08182	-0.07264	0.08554	0.10000	0.09841
40380	OX359197.1	5057828	0.12697	0.09374	0.14109	0.10537	0.18117	0.11765
40387	OX359197.1	5066904	-0.05814	0.09491	-0.06139	0.10740	-0.06209	0.11961
40389	OX359197.1	5066952	0.25985	0.09491	0.32354	0.10741	0.33362	0.11963
40410	OX359197.1	5101824	-0.01286	0.09941	-0.00983	0.11501	-0.03889	0.12705
40417	OX359197.1	5108729	-0.05814	0.10021	-0.06139	0.11639	-0.06209	0.12844
40439	OX359197.1	5129059	0.30135	0.10242	0.25556	0.12024	0.25018	0.13238
40464	OX359197.1	5159308	-0.03950	0.10497	-0.04751	0.12486	-0.04588	0.13734
40477	OX359197.1	5175657	0.32394	0.10596	0.21024	0.12682	0.24242	0.13961
40494	OX359197.1	5197775	0.12511	0.10690	0.19977	0.12886	0.23435	0.14218
40496	OX359197.1	5199149	0.18089	0.10693	0.02532	0.12895	0.02055	0.14231
40497	OX359197.1	5199152	0.06261	0.10693	0.52741	0.12895	0.49664	0.14231
40500	OX359197.1	5206319	0.33628	0.10701	0.52208	0.12938	0.53386	0.14297
40505	OX359197.1	5212668	0.11263	0.10710	0.07047	0.12971	0.04580	0.14347
40545	OX359197.1	5280072	-0.05941	0.10463	-0.03608	0.12848	-0.00438	0.14435
40582	OX359197.1	5323618	0.23592	0.10041	0.21946	0.12412	0.22495	0.14106
40584	OX359197.1	5324300	-0.04961	0.10033	-0.03115	0.12403	-0.03321	0.14098
40591	OX359197.1	5329491	0.02675	0.09969	0.03445	0.12334	0.02734	0.14037
40593	OX359197.1	5329546	-0.05748	0.09969	-0.10532	0.12333	0.12481	0.14037
40612	OX359197.1	5357796	0.28662	0.09583	0.17455	0.11903	0.18367	0.13630
40644	OX359197.1	5415419	0.00802	0.08622	0.00762	0.10796	0.01011	0.12441
40656	OX359197.1	5447356	0.23379	0.08065	0.67536	0.10123	0.73615	0.11645
40679	OX359197.1	5510782	-0.05814	0.06834	-0.06139	0.08593	-0.06209	0.09802
40685	OX359197.1	5518616	0.11392	0.06672	0.03805	0.08390	-0.01030	0.09561
40697	OX359197.1	5537819	-0.07143	0.06314	-0.07656	0.07936	-0.09272	0.09011
40701	OX359197.1	5543296	0.15331	0.06214	0.12870	0.07808	0.13482	0.08857
40721	OX359197.1	5571099	0.13108	0.05727	0.28775	0.07193	0.36468	0.08117
40726	OX359197.1	5573115	0.19822	0.05691	0.03664	0.07148	-0.02708	0.08063
40749	OX359197.1	5596409	0.01848	0.05293	0.00221	0.06636	0.04215	0.07461
40771	OX359197.1	5644986	0.05653	0.04586	0.05771	0.05771	0.05571	0.06447
40790	OX359197.1	5673297	-0.03279	0.04244	-0.03457	0.05338	-0.03496	0.05962
40798	OX359197.1	5682568	-0.03279	0.04167	-0.01551	0.05250	-0.01286	0.05859
40804	OX359197.1	5693489	-0.04961	0.04084	-0.03115	0.05161	-0.03321	0.05760
40922	OX359197.1	5887771	0.27010	0.05105	0.34286	0.05741	0.34286	0.06711
40935	OX359197.1	5905149	-0.05387	0.05271	-0.05253	0.05755	-0.05381	0.06797
40952	OX359197.1	5920676	0.01597	0.05443	0.00963	0.05828	0.01428	0.06934
40970	OX359197.1	5940584	0.06034	0.05663	0.15936	0.05932	0.16751	0.07121
40986	OX359197.1	5955263	0.03378	0.05825	0.00205	0.06004	0.00942	0.07254
40988	OX359197.1	5965007	-0.03675	0.05954	-0.03619	0.06084	0.00384	0.07374
41013	OX359197.1	6029789	0.19296	0.06766	0.02588	0.06647	0.05797	0.08191
41069	OX359197.1	6123947	0.00802	0.08181	0.00762	0.08366	0.01011	0.10201
41077	OX359197.1	6133961	-0.04368	0.08332	-0.00262	0.08583	0.02555	0.10444
41107	OX359197.1	6227415	0.03438	0.09286	0.00006	0.10213	0.07787	0.12224
41113	OX359197.1	6233165	-0.05692	0.09318	-0.04260	0.10283	-0.04249	0.12300
41114	OX359197.1	6233168	-0.06667	0.09318	-0.07087	0.10283	-0.08441	0.12300
41125	OX359197.1	6239618	0.14110	0.09349	0.04932	0.10356	0.05660	0.12379
41134	OX359197.1	6253703	0.61332	0.09402	0.55198	0.10494	0.54885	0.12528
41143	OX359197.1	6269470	0.32893	0.09432	0.32399	0.10612	0.35154	0.12653
41150	OX359197.1	6280970	0.15058	0.09435	0.46749	0.10671	0.46374	0.12715
41151	OX359197.1	6287111	0.01754	0.09429	0.08189	0.10693	0.14062	0.12737
41153	OX359197.1	6288109	-0.05963	0.09428	-0.05995	0.10696	-0.05703	0.12740
41159	OX359197.1	6293333	0.10175	0.09419	0.02596	0.10709	0.07407	0.12752
41190	OX359197.1	6345390	-0.07143	0.09103	-0.07656	0.10525	0.01079	0.12527
41206	OX359197.1	6382363	0.06392	0.08679	0.18194	0.10102	0.19080	0.12010
41233	OX359197.1	6411268	0.11668	0.08209	0.16837	0.09550	0.17803	0.11348
41242	OX359197.1	6429381	0.23211	0.07857	0.03874	0.09124	0.05288	0.10831
41285	OX359197.1	6503467	-0.01523	0.06176	0.11811	0.06974	0.15101	0.08177
41325	OX359197.1	6565905	0.01150	0.05128	0.00129	0.05441	0.01434	0.06136
41331	OX359197.1	6571671	-0.05692	0.05075	-0.04260	0.05350	-0.04249	0.06000
41344	OX359197.1	6598575	0.15493	0.04972	0.02386	0.05098	-0.01533	0.05544
41356	OX359197.1	6618610	-0.05347	0.05024	-0.03874	0.05076	-0.03743	0.05392
41375	OX359197.1	6661343	-0.05387	0.05465	-0.05253	0.05483	-0.05381	0.05609
41448	OX359197.1	6801112	0.39612	0.07587	0.41418	0.08389	0.40805	0.08585
41456	OX359197.1	6813444	-0.03319	0.07649	-0.02334	0.08540	-0.02041	0.08783
[truncated: 991 more rows]

## Sheet: Oscarella_lobularis
# Population F	Osc_10_nap_F,Osc_11_nap_F,Osc_12_nap_F,Osc_1_Nap22_F,Osc_4_Nap22_F,Osc_4_nap_F
# Population M	Osc1_M,Osc2_M,Osc3_M,Osc_13_nap_M,Osc_2_Nap22_M,Osc_3_Nap22_M,Osc_5_nap_M
# Group defaultgrp	F,M
# Locus ID	Chr	BP	phi_st	Smoothed Phi_st	Fst'	Smoothed Fst'	D_est	Smoothed D_est
49	OX382150.1	37640	-0.09039	0.00750	-0.08548	-0.02857	-0.12755	-0.02429
90	OX382150.1	73174	-0.06329	0.00999	-0.06126	-0.02745	-0.06069	-0.02119
156	OX382150.1	112501	0.10923	0.01260	0.02003	-0.02634	0.01786	-0.01798
196	OX382150.1	158924	-0.11111	0.01438	-0.12500	-0.02655	-0.14337	-0.01565
203	OX382150.1	161804	0.03309	0.01445	0.03522	-0.02662	0.03574	-0.01555
253	OX382150.1	180701	0.10923	0.01484	0.02003	-0.02721	0.01786	-0.01504
266	OX382150.1	186690	0.09091	0.01492	0.01786	-0.02746	0.00325	-0.01493
286	OX382150.1	196052	0.10923	0.01502	0.02003	-0.02791	0.01786	-0.01481
293	OX382150.1	202072	-0.11628	0.01507	-0.13089	-0.02824	0.08333	-0.01476
405	OX382150.1	312176	-0.05785	0.01385	0.00000	-0.03936	-0.03373	-0.01693
449	OX382150.1	338086	-0.06329	0.01345	-0.06126	-0.04281	-0.06069	-0.01774
473	OX382150.1	354063	0.06061	0.01325	0.03883	-0.04490	0.00860	-0.01815
524	OX382150.1	380909	0.10923	0.01300	0.02003	-0.04817	0.01786	-0.01859
597	OX382150.1	429859	-0.06061	0.01307	-0.05769	-0.05221	-0.05978	-0.01795
628	OX382150.1	450573	-0.05678	0.01317	-0.08434	-0.05307	-0.08663	-0.01716
651	OX382150.1	472451	-0.03820	0.01329	-0.75182	-0.05329	-0.25684	-0.01595
657	OX382150.1	473985	0.20635	0.01330	0.20800	-0.05328	0.15385	-0.01586
687	OX382150.1	504299	-0.06329	0.01369	-0.06126	-0.05192	-0.06069	-0.01321
688	OX382150.1	504332	-0.09375	0.01369	-0.10315	-0.05192	-0.06876	-0.01321
741	OX382150.1	538162	0.23575	0.01396	0.22452	-0.04874	0.22637	-0.00967
942	OX382150.1	656709	-0.06201	0.01266	-0.05419	-0.02634	-0.01230	0.00548
998	OX382150.1	686483	0.03309	0.01244	0.03522	-0.02004	0.03574	0.00901
1058	OX382150.1	722656	-0.09375	0.01211	-0.10315	-0.01366	-0.06876	0.01236
1063	OX382150.1	727970	0.02778	0.01204	0.02349	-0.01288	0.02407	0.01275
1282	OX382150.1	842027	0.18623	0.00681	0.07728	-0.00828	0.06168	0.01291
1298	OX382150.1	852168	-0.01740	0.00592	0.07834	-0.00883	0.10973	0.01222
1414	OX382150.1	929668	-0.07525	-0.00315	-0.05805	-0.01517	-0.05625	0.00468
1433	OX382150.1	937258	0.21311	-0.00424	0.05677	-0.01612	0.10959	0.00368
1438	OX382150.1	938203	0.20000	-0.00436	0.12903	-0.01623	0.21429	0.00356
1456	OX382150.1	950359	-0.06972	-0.00601	-0.06136	-0.01763	-0.06364	0.00202
1517	OX382150.1	988669	-0.09191	-0.01135	-0.09496	-0.02200	-0.06364	-0.00297
1518	OX382150.1	988747	-0.03468	-0.01136	-0.03181	-0.02201	-0.00804	-0.00297
1540	OX382150.1	990853	-0.09375	-0.01163	-0.10315	-0.02221	-0.06876	-0.00323
1551	OX382150.1	993178	-0.02593	-0.01192	-0.00230	-0.02244	0.00418	-0.00351
1657	OX382150.1	1065614	-0.07811	-0.01913	-0.06198	-0.02747	-0.06254	-0.01092
1720	OX382150.1	1101724	-0.07811	-0.02048	-0.06198	-0.02789	-0.06254	-0.01283
1911	OX382150.1	1224186	-0.09375	-0.01355	-0.10315	-0.01925	-0.06876	-0.00714
1973	OX382150.1	1275787	0.13669	-0.01077	0.03069	-0.01616	0.00028	-0.00344
2039	OX382150.1	1310318	-0.09091	-0.01048	-0.10000	-0.01570	-0.07789	-0.00219
2047	OX382150.1	1315326	0.02778	-0.01052	0.02349	-0.01570	0.02407	-0.00207
2073	OX382150.1	1325624	-0.03402	-0.01066	-0.00712	-0.01579	-0.02143	-0.00189
2082	OX382150.1	1335156	0.03030	-0.01089	0.08333	-0.01596	0.08333	-0.00183
2083	OX382150.1	1338379	-0.01201	-0.01099	-0.00912	-0.01604	-0.01230	-0.00182
2140	OX382150.1	1375693	0.23575	-0.01271	0.22452	-0.01752	0.22637	-0.00243
2159	OX382150.1	1386987	-0.09375	-0.01338	-0.10315	-0.01812	-0.06876	-0.00280
2194	OX382150.1	1410504	-0.07280	-0.01518	-0.07840	-0.01964	-0.07866	-0.00398
2209	OX382150.1	1420915	0.01642	-0.01597	0.01604	-0.02033	0.01476	-0.00455
2220	OX382150.1	1429399	0.10024	-0.01663	0.10576	-0.02091	0.23182	-0.00505
2236	OX382150.1	1438322	-0.09375	-0.01735	-0.10315	-0.02153	-0.06876	-0.00560
2269	OX382150.1	1463021	-0.09375	-0.01938	-0.10315	-0.02319	-0.06876	-0.00726
2346	OX382150.1	1517001	-0.06201	-0.02360	-0.05419	-0.02630	-0.01230	-0.01091
2352	OX382150.1	1521706	-0.11628	-0.02382	-0.13089	-0.02640	-0.11429	-0.01113
2392	OX382150.1	1549432	0.09091	-0.02536	0.01786	-0.02726	0.00325	-0.01258
2397	OX382150.1	1551261	-0.09091	-0.02545	-0.10000	-0.02730	-0.07789	-0.01267
2425	OX382150.1	1566480	-0.09091	-0.02607	-0.10000	-0.02752	-0.07789	-0.01329
2431	OX382150.1	1567697	-0.09091	-0.02611	-0.10000	-0.02753	-0.07789	-0.01334
2512	OX382150.1	1622375	0.07763	-0.02711	0.06126	-0.02707	0.06350	-0.01438
2561	OX382150.1	1637226	-0.11111	-0.02692	-0.12500	-0.02659	-0.17857	-0.01426
2569	OX382150.1	1641050	-0.05329	-0.02683	-0.05537	-0.02644	-0.01418	-0.01420
2585	OX382150.1	1653240	0.13726	-0.02624	0.17836	-0.02579	0.17816	-0.01382
2607	OX382150.1	1666432	-0.07811	-0.02558	0.03252	-0.02507	0.02838	-0.01332
2621	OX382150.1	1676876	-0.06329	-0.02485	-0.06126	-0.02437	-0.06069	-0.01278
2705	OX382150.1	1735602	-0.03030	-0.01648	-0.03125	-0.01715	-0.00156	-0.00561
2730	OX382150.1	1752105	-0.08387	-0.01301	-0.09150	-0.01455	-0.09160	-0.00283
2923	OX382150.1	1898710	-0.07811	0.03790	-0.06198	0.02571	-0.06254	0.03950
2956	OX382150.1	1916253	0.06977	0.04502	0.01478	0.03220	0.05323	0.04584
2989	OX382150.1	1930213	-0.09091	0.05054	-0.10000	0.03718	-0.07789	0.05069
2993	OX382150.1	1932413	-0.07280	0.05141	-0.07840	0.03800	-0.07866	0.05147
3005	OX382150.1	1938324	-0.00646	0.05362	-0.08893	0.04012	-0.04742	0.05346
3030	OX382150.1	1950151	0.15723	0.05818	0.22967	0.04455	0.29705	0.05763
3061	OX382150.1	1970258	0.20635	0.06584	0.20800	0.05218	0.15385	0.06468
3078	OX382150.1	1980152	0.15916	0.06953	0.03327	0.05595	0.08333	0.06814
3095	OX382150.1	1988528	0.05352	0.07251	0.00624	0.05903	0.04376	0.07094
3099	OX382150.1	1989123	-0.03120	0.07272	-0.03413	0.05925	-0.00455	0.07113
3143	OX382150.1	2014506	0.11509	0.08109	0.01463	0.06807	-0.00923	0.07899
3219	OX382150.1	2091178	0.07763	0.10027	0.06126	0.08825	0.06350	0.09630
3223	OX382150.1	2095570	0.10923	0.10116	0.02003	0.08909	0.01786	0.09700
3271	OX382150.1	2127031	0.42584	0.10466	0.56579	0.09197	0.55864	0.09922
3299	OX382150.1	2151192	0.41692	0.10505	0.60128	0.09127	0.60011	0.09829
3325	OX382150.1	2171282	-0.06329	0.10428	-0.06126	0.08926	-0.06069	0.09631
3351	OX382150.1	2199243	-0.01010	0.10128	-0.00800	0.08394	-0.05769	0.09130
3397	OX382150.1	2226341	0.13669	0.09700	0.03069	0.07675	0.00028	0.08467
3440	OX382150.1	2257201	0.06305	0.09075	-0.00601	0.06670	-0.03929	0.07542
3441	OX382150.1	2257204	0.40269	0.09075	0.39250	0.06670	0.39117	0.07542
3442	OX382150.1	2257848	0.10296	0.09061	0.00869	0.06648	0.04027	0.07522
3485	OX382150.1	2284984	-0.11628	0.08455	-0.13089	0.05682	-0.17998	0.06626
3491	OX382150.1	2285956	-0.04938	0.08433	-0.04211	0.05647	0.04647	0.06593
3578	OX382150.1	2343814	0.28522	0.07160	0.33444	0.03597	0.41104	0.04636
3589	OX382150.1	2347200	-0.09375	0.07092	-0.10315	0.03485	-0.06876	0.04525
3665	OX382150.1	2366468	-0.03934	0.06729	-0.29750	0.02876	-0.18743	0.03916
3670	OX382150.1	2368101	0.23980	0.06699	0.49418	0.02825	0.51624	0.03865
3671	OX382150.1	2368104	-0.04551	0.06699	-0.28151	0.02825	-0.28995	0.03865
3699	OX382150.1	2384790	-0.07280	0.06417	-0.07840	0.02345	-0.07866	0.03369
3827	OX382150.1	2451143	-0.07280	0.05590	-0.07840	0.00879	-0.07866	0.01717
3843	OX382150.1	2462463	0.06977	0.05500	0.01478	0.00705	-0.02031	0.01496
3845	OX382150.1	2463014	-0.09091	0.05496	-0.16667	0.00698	-0.13750	0.01486
3864	OX382150.1	2475661	0.36508	0.05411	0.18699	0.00531	0.15411	0.01277
3904	OX382150.1	2499558	-0.09091	0.05307	-0.10000	0.00300	-0.07789	0.00931
3951	OX382150.1	2531268	-0.00000	0.05287	-0.00000	0.00189	-0.00704	0.00667
3971	OX382150.1	2543543	0.42268	0.05322	0.35673	0.00206	0.36066	0.00627
4019	OX382150.1	2579758	-0.08122	0.05457	-0.25797	0.00404	-0.25899	0.00683
4052	OX382150.1	2623071	-0.06329	0.05905	-0.06126	0.01104	-0.06069	0.01274
4056	OX382150.1	2625392	-0.06329	0.05924	-0.06126	0.01149	-0.06069	0.01317
4106	OX382150.1	2663114	0.06977	0.06540	0.01478	0.02176	-0.02031	0.02353
4123	OX382150.1	2671236	0.10923	0.06697	0.02003	0.02438	0.01786	0.02629
4165	OX382150.1	2702435	0.10923	0.07395	0.02003	0.03578	0.01786	0.03861
4223	OX382150.1	2749695	0.04328	0.08536	0.00816	0.05443	0.00325	0.05978
4370	OX382150.1	2825377	-0.05075	0.09989	-0.00240	0.07879	-0.00455	0.08961
4408	OX382150.1	2858469	0.10923	0.10295	0.02003	0.08457	0.01786	0.09753
4411	OX382150.1	2861779	0.43434	0.10305	0.75000	0.08490	0.74157	0.09805
4439	OX382150.1	2876609	0.10923	0.10371	0.02003	0.08660	0.01786	0.10051
4464	OX382150.1	2889957	0.10923	0.10377	0.02003	0.08739	0.01786	0.10189
4509	OX382150.1	2919662	0.06977	0.10280	0.00990	0.08767	0.21067	0.10316
4533	OX382150.1	2935430	0.12727	0.10155	0.04636	0.08698	0.00244	0.10276
4562	OX382150.1	2961168	0.35537	0.09907	0.35833	0.08513	0.38362	0.10106
4604	OX382150.1	2985719	-0.11111	0.09622	-0.12500	0.08281	-0.14337	0.09856
4614	OX382150.1	2988063	0.45455	0.09593	0.31250	0.08257	0.36066	0.09828
4651	OX382150.1	3013954	-0.05882	0.09256	-0.10000	0.07976	-0.05405	0.09492
4655	OX382150.1	3016756	-0.01888	0.09223	0.15515	0.07947	0.20201	0.09456
4656	OX382150.1	3016759	0.10024	0.09222	0.10576	0.07947	0.12636	0.09456
4693	OX382150.1	3046280	0.04382	0.08887	0.01008	0.07681	-0.01549	0.09095
4737	OX382150.1	3073572	0.04328	0.08608	0.00816	0.07460	0.00325	0.08768
4740	OX382150.1	3074177	-0.09375	0.08602	-0.10315	0.07455	-0.06876	0.08761
4776	OX382150.1	3100593	-0.09375	0.08388	-0.10315	0.07302	-0.06876	0.08496
4839	OX382150.1	3151505	0.55556	0.08134	0.45455	0.07170	0.36066	0.08165
4847	OX382150.1	3155322	0.09091	0.08122	0.08333	0.07170	0.10625	0.08151
4850	OX382150.1	3157714	-0.06667	0.08116	-0.00000	0.07169	-0.04890	0.08141
4858	OX382150.1	3201285	0.02778	0.08047	0.02349	0.07182	0.02407	0.08022
4859	OX382150.1	3201784	0.11111	0.08047	0.02703	0.07182	0.03140	0.08021
4860	OX382150.1	3202207	0.11587	0.08046	0.15169	0.07183	0.15322	0.08021
4862	OX382150.1	3203243	-0.08387	0.08046	-0.09150	0.07183	-0.09160	0.08019
4884	OX382150.1	3224080	-0.09222	0.08032	-0.43808	0.07198	-0.11025	0.07991
4916	OX382150.1	3242964	-0.00358	0.08019	0.40000	0.07206	0.20556	0.07972
4919	OX382150.1	3243099	0.36185	0.08019	0.38218	0.07206	0.39009	0.07972
5011	OX382150.1	3297249	0.17768	0.07901	0.17768	0.07117	0.17816	0.07879
5029	OX382150.1	3303198	-0.12676	0.07878	-0.14490	0.07094	-0.19380	0.07862
5032	OX382150.1	3304237	0.12052	0.07864	0.02892	0.07080	0.02570	0.07857
5046	OX382150.1	3309419	0.01642	0.07837	0.01604	0.07060	0.01476	0.07844
5056	OX382150.1	3314814	0.35703	0.07789	0.46010	0.06993	0.46106	0.07788
5098	OX382150.1	3348146	0.10923	0.07549	0.02003	0.06773	0.01786	0.07657
5104	OX382150.1	3351820	-0.09375	0.07515	-0.10315	0.06740	-0.06876	0.07637
5141	OX382150.1	3380550	0.19826	0.07176	0.16269	0.06436	0.16023	0.07449
5178	OX382150.1	3400597	-0.11628	0.06861	-0.13089	0.06152	-0.08686	0.07285
5310	OX382150.1	3510593	-0.09191	0.03578	-0.09496	0.03600	-0.06364	0.05739
5327	OX382150.1	3552037	0.12187	0.01774	0.13070	0.02505	0.25949	0.05057
5413	OX382150.1	3642966	-0.02593	-0.01952	-0.00230	0.00867	0.00418	0.03911
5491	OX382150.1	3705395	-0.06201	-0.03397	-0.05419	0.00645	-0.01230	0.03705
5510	OX382150.1	3723234	-0.02564	-0.03615	-0.02857	0.00686	-0.08333	0.03730
5548	OX382150.1	3753537	-0.11111	-0.03883	-0.12500	0.00764	0.02174	0.03788
5603	OX382150.1	3783371	-0.02903	-0.04065	0.05513	0.00782	0.05241	0.03780
5650	OX382150.1	3822889	-0.05417	-0.04108	0.25285	0.00791	0.25131	0.03729
5688	OX382150.1	3850776	-0.05263	-0.04119	-0.03687	0.00669	0.00047	0.03549
5697	OX382150.1	3870092	-0.07280	-0.04107	-0.07840	0.00529	-0.07866	0.03356
5739	OX382150.1	3913075	0.04642	-0.04049	0.05020	0.00077	0.17884	0.02725
5833	OX382150.1	4003102	0.02778	-0.04206	0.02349	-0.01626	0.02407	0.00261
5892	OX382150.1	4068567	-0.09375	-0.04362	-0.10315	-0.02901	-0.06876	-0.01890
5903	OX382150.1	4073807	-0.06329	-0.04365	-0.06126	-0.02980	-0.06069	-0.02047
5950	OX382150.1	4136559	-0.09039	-0.04009	-0.08548	-0.03388	-0.12755	-0.03275
6072	OX382150.1	4265684	-0.12676	-0.01211	-0.14490	-0.01174	-0.20799	-0.01497
6110	OX382150.1	4289255	-0.11111	-0.00580	-0.12500	-0.00654	-0.14337	-0.00754
6161	OX382150.1	4347457	0.31173	0.00733	0.33530	0.00433	0.33219	0.01205
6275	OX382150.1	4417028	-0.09091	0.01861	-0.03623	0.01054	-0.02031	0.03190
6340	OX382150.1	4478386	-0.10092	0.02578	-0.11214	0.01188	-0.15643	0.04522
6442	OX382150.1	4529902	0.14308	0.03487	0.01474	0.01539	0.05611	0.05700
6455	OX382150.1	4534098	-0.09747	0.03572	-0.10672	0.01581	0.10545	0.05799
6477	OX382150.1	4542829	0.10791	0.03762	0.11226	0.01680	0.14754	0.06011
6654	OX382150.1	4772328	0.06977	0.10778	0.01478	0.07417	0.05323	0.10819
6732	OX382150.1	4832763	-0.07892	0.11099	-0.08578	0.07899	0.04920	0.10527
6735	OX382150.1	4834785	0.67379	0.11103	0.63252	0.07913	0.63380	0.10518
6790	OX382150.1	4882307	-0.11628	0.11175	-0.13089	0.08294	-0.11429	0.10414
6795	OX382150.1	4885353	-0.09091	0.11179	-0.10000	0.08325	-0.07789	0.10418
6909	OX382150.1	4964809	-0.09091	0.11603	-0.10000	0.09749	-0.07789	0.11341
6915	OX382150.1	4968792	0.10923	0.11642	0.02003	0.09853	0.01786	0.11430
6921	OX382150.1	4971499	0.33333	0.11681	0.18182	0.09965	0.09426	0.11531
6990	OX382150.1	5016832	0.08046	0.12306	0.07300	0.11453	0.05241	0.12916
7076	OX382150.1	5117103	0.37401	0.13936	0.63247	0.15077	0.75345	0.16727
7092	OX382150.1	5136045	-0.11628	0.14168	-0.13089	0.15621	-0.08686	0.17324
7134	OX382150.1	5160281	0.03896	0.14388	0.08333	0.16188	0.07143	0.17944
7164	OX382150.1	5185263	0.29515	0.14494	0.30876	0.16591	0.26230	0.18393
7181	OX382150.1	5197128	0.39276	0.14500	0.39088	0.16718	0.39009	0.18536
7229	OX382150.1	5236673	0.12187	0.14286	0.13070	0.16808	0.25949	0.18620
7328	OX382150.1	5330188	-0.09375	0.12590	-0.10315	0.15701	-0.06876	0.17310
7389	OX382150.1	5374970	0.11111	0.11492	0.02703	0.14823	-0.03215	0.16255
7454	OX382150.1	5421488	0.20733	0.10263	0.40011	0.14059	0.40117	0.15330
7518	OX382150.1	5463167	0.19217	0.09152	0.20351	0.13242	0.20310	0.14373
7576	OX382150.1	5501900	0.04000	0.08159	0.12500	0.12560	0.31250	0.13584
7611	OX382150.1	5546631	-0.07438	0.07060	-0.04762	0.11937	-0.06122	0.12890
7664	OX382150.1	5591525	0.20635	0.06046	0.20800	0.11590	0.15385	0.12519
7744	OX382150.1	5653131	0.14998	0.04797	0.44022	0.11686	0.37894	0.12677
7753	OX382150.1	5658432	-0.04670	0.04705	-0.50000	0.11727	-0.47296	0.12726
7790	OX382150.1	5685562	0.12187	0.04249	0.13070	0.12002	0.08333	0.13043
7792	OX382150.1	5687587	0.19826	0.04212	0.49398	0.12026	0.49291	0.13064
7802	OX382150.1	5693667	0.04382	0.04115	0.01008	0.12102	0.08333	0.13151
7822	OX382150.1	5709671	0.08075	0.03865	0.41667	0.12323	0.37464	0.13402
7849	OX382150.1	5725436	-0.09375	0.03620	-0.10315	0.12551	-0.06876	0.13658
7875	OX382150.1	5732258	-0.10414	0.03520	-0.11576	0.12661	0.01515	0.13780
7904	OX382150.1	5742719	-0.08387	0.03370	-0.09150	0.12837	-0.09160	0.13974
7909	OX382150.1	5746705	0.15916	0.03314	0.03327	0.12906	0.08333	0.14049
7922	OX382150.1	5759371	0.13669	0.03133	0.03069	0.13116	0.00028	0.14278
7966	OX382150.1	5788074	-0.11111	0.02760	-0.11429	0.13613	-0.13372	0.14810
7979	OX382150.1	5799863	-0.02418	0.02604	-0.00296	0.13797	-0.05711	0.15002
8045	OX382150.1	5843007	0.02041	0.02085	0.00415	0.14400	0.08675	0.15624
8059	OX382150.1	5853874	0.05438	0.01967	100000	0.14517	100000	0.15737
8069	OX382150.1	5859755	0.06184	0.01905	100000	0.14571	100000	0.15788
8071	OX382150.1	5860139	-0.07892	0.01900	-0.08578	0.14574	0.04920	0.15791
8083	OX382150.1	5873735	0.07763	0.01746	0.06126	0.14653	0.06350	0.15861
8120	OX382150.1	5909276	0.04920	0.01405	0.14359	0.14700	0.10345	0.15857
8151	OX382150.1	5931624	-0.12676	0.01187	-0.14490	0.14522	-0.19380	0.15629
8197	OX382150.1	5964800	-0.09375	0.00859	-0.10315	0.13863	-0.06876	0.14877
8258	OX382150.1	6000805	0.02778	0.00482	0.02349	0.12628	0.02407	0.13523
8350	OX382150.1	6088608	0.18183	-0.00879	0.45731	0.07282	0.45657	0.07896
8458	OX382150.1	6169622	-0.09091	-0.02649	-0.10000	0.01358	-0.07789	0.01977
8530	OX382150.1	6208900	-0.06329	-0.03510	-0.06126	-0.01022	-0.06069	-0.00269
8541	OX382150.1	6214762	-0.12676	-0.03652	-0.14490	-0.01353	-0.19380	-0.00565
8563	OX382150.1	6225215	0.09091	-0.03868	0.01786	-0.01909	0.05797	-0.01062
8591	OX382150.1	6241104	-0.12676	-0.04180	-0.14490	-0.02686	-0.19380	-0.01734
8611	OX382150.1	6253936	-0.08387	-0.04433	-0.09150	-0.03274	-0.09160	-0.02226
8821	OX382150.1	6397784	-0.07892	-0.06234	-0.08578	-0.06832	0.04920	-0.04760
8842	OX382150.1	6406236	-0.11628	-0.06264	-0.13089	-0.06873	-0.11429	-0.04776
8928	OX382150.1	6494473	-0.09039	-0.06175	-0.08548	-0.06752	-0.04762	-0.04785
8988	OX382150.1	6535735	-0.06329	-0.05952	-0.06126	-0.06479	-0.06069	-0.04766
9028	OX382150.1	6572564	-0.03120	-0.05685	-0.03413	-0.06222	-0.00455	-0.04765
9042	OX382150.1	6583224	0.02778	-0.05569	0.02349	-0.06105	0.02407	-0.04727
9072	OX382150.1	6606930	-0.11111	-0.05350	-0.12500	-0.05887	-0.17857	-0.04673
9422	OX382150.1	6924209	-0.07280	0.00828	-0.07840	0.01542	-0.07866	0.03312
9425	OX382150.1	6927626	-0.06716	0.00865	-0.12623	0.01613	-0.10000	0.03383
9462	OX382150.1	6952297	0.00587	0.01107	0.02430	0.02098	0.02407	0.03864
9482	OX382150.1	6963648	-0.06201	0.01194	-0.05419	0.02296	-0.01230	0.04057
9518	OX382150.1	6989129	-0.09375	0.01358	-0.10315	0.02705	-0.06876	0.04440
9559	OX382150.1	7008669	0.32112	0.01439	0.29219	0.02964	0.33219	0.04669
9589	OX382150.1	7032969	0.09997	0.01500	0.07096	0.03232	0.06918	0.04889
9611	OX382150.1	7056937	-0.05263	0.01519	-0.03687	0.03434	0.00047	0.05042
9642	OX382150.1	7107282	0.18605	0.01417	0.28305	0.03610	0.30130	0.05084
9643	OX382150.1	7107347	0.08046	0.01417	0.02141	0.03610	-0.00156	0.05084
9654	OX382150.1	7119538	-0.11863	0.01373	-0.06749	0.03612	0.02874	0.05051
9672	OX382150.1	7136030	-0.06061	0.01302	0.25000	0.03591	0.22470	0.04984
9770	OX382150.1	7196089	-0.02593	0.00988	-0.00230	0.03341	0.00418	0.04565
9797	OX382150.1	7207337	0.15263	0.00925	0.15022	0.03274	0.14754	0.04467
9814	OX382150.1	7212877	-0.11111	0.00893	-0.12500	0.03240	-0.14337	0.04418
9815	OX382150.1	7212880	0.01642	0.00893	0.01604	0.03240	0.01476	0.04418
9816	OX382150.1	7213197	-0.06201	0.00891	-0.05419	0.03238	-0.01230	0.04415
9833	OX382150.1	7220760	-0.09191	0.00849	-0.09496	0.03190	-0.06364	0.04347
9894	OX382150.1	7258322	0.09091	0.00642	0.01786	0.02946	0.00325	0.04006
9934	OX382150.1	7291767	-0.01299	0.00474	-0.00833	0.02745	0.03140	0.03721
9984	OX382150.1	7341065	0.00587	0.00259	0.02430	0.02520	0.02407	0.03380
10042	OX382150.1	7373082	-0.02273	0.00141	0.08333	0.02438	0.07143	0.03225
10186	OX382151.1	49777	0.13669	0.06665	0.03069	0.03421	0.00028	0.07938
10296	OX382151.1	121781	-0.03424	0.07035	0.00670	0.04159	0.11946	0.08209
10385	OX382151.1	169239	0.06977	0.07399	0.01265	0.04623	0.19776	0.08145
10399	OX382151.1	178055	-0.03030	0.07469	-0.03125	0.04702	-0.00156	0.08115
10475	OX382151.1	248086	0.13669	0.08089	0.03069	0.05223	0.00028	0.07778
10513	OX382151.1	272315	0.47712	0.08304	0.50345	0.05327	0.55577	0.07605
10548	OX382151.1	286344	-0.12676	0.08436	-0.14490	0.05376	-0.19380	0.07506
10618	OX382151.1	340102	-0.09091	0.08990	-0.10000	0.05478	-0.07789	0.07152
10666	OX382151.1	361930	0.03030	0.09257	0.08333	0.05503	0.10176	0.07049
10696	OX382151.1	375990	-0.03674	0.09444	-0.00985	0.05508	-0.01114	0.06988
10740	OX382151.1	397693	0.06977	0.09753	0.00990	0.05517	0.04241	0.06930
10743	OX382151.1	397759	0.27273	0.09754	0.12000	0.05517	0.08675	0.06930
10747	OX382151.1	398976	0.23575	0.09772	0.22452	0.05518	0.22637	0.06928
10803	OX382151.1	482465	-0.07525	0.11234	-0.12655	0.05677	-0.12755	0.07156
10917	OX382151.1	544789	0.27273	0.12385	0.12000	0.05993	0.17460	0.07730
10994	OX382151.1	603272	0.36508	0.13153	0.18699	0.06399	0.19863	0.08346
10997	OX382151.1	605286	0.18089	0.13170	0.05232	0.06412	-0.01230	0.08365
11004	OX382151.1	608716	-0.09091	0.13195	-0.10000	0.06435	-0.07789	0.08396
11111	OX382151.1	669265	0.33479	0.13137	0.31204	0.06701	0.53181	0.08636
11125	OX382151.1	681748	0.13669	0.13018	0.03069	0.06714	0.00028	0.08611
11172	OX382151.1	714622	0.01818	0.12520	-0.03125	0.06657	-0.02143	0.08397
11302	OX382151.1	799329	0.15263	0.10169	0.15022	0.05769	0.14754	0.06806
11353	OX382151.1	823347	0.13669	0.09277	0.03069	0.05313	0.00028	0.06128
11437	OX382151.1	869694	0.03309	0.07456	0.03522	0.04311	0.03574	0.04744
11447	OX382151.1	874985	0.12727	0.07252	0.13725	0.04194	0.15322	0.04588
11536	OX382151.1	952435	-0.06329	0.04442	-0.06126	0.02507	-0.06069	0.02515
11551	OX382151.1	956642	0.13669	0.04307	0.03069	0.02424	0.00028	0.02420
11631	OX382151.1	1037849	0.18089	0.02191	0.05232	0.01067	0.04741	0.01021
11639	OX382151.1	1043975	-0.09375	0.02072	-0.10315	0.00958	-0.06876	0.00916
11683	OX382151.1	1071254	-0.11111	0.01603	-0.12500	0.00601	-0.17857	0.00621
11729	OX382151.1	1094395	0.09818	0.01303	0.28704	0.00315	0.30775	0.00418
11737	OX382151.1	1099766	-0.07248	0.01241	-0.04555	0.00248	-0.03215	0.00375
11738	OX382151.1	1100214	-0.11111	0.01236	-0.12500	0.00242	-0.14337	0.00371
11835	OX382151.1	1167939	0.07763	0.00762	0.06126	-0.00594	0.06350	-0.00016
11912	OX382151.1	1218209	0.13669	0.00607	0.03069	-0.01378	0.00028	-0.00276
11914	OX382151.1	1218305	0.02152	0.00607	0.01281	-0.01380	0.01064	-0.00276
11974	OX382151.1	1262636	-0.06554	0.00627	-0.06136	-0.02088	-0.06364	-0.00448
12092	OX382151.1	1349286	-0.09375	0.01240	-0.10315	-0.02940	-0.06876	-0.00420
12144	OX382151.1	1377355	-0.09091	0.01671	-0.10000	-0.02875	-0.07789	-0.00223
12184	OX382151.1	1402066	0.24153	0.02129	0.05988	-0.02665	0.25000	0.00029
12201	OX382151.1	1411012	-0.06329	0.02310	-0.06126	-0.02553	-0.06069	0.00147
12232	OX382151.1	1425521	-0.01877	0.02624	-0.08395	-0.02325	0.04260	0.00348
12325	OX382151.1	1481788	-0.09091	0.03976	-0.10000	-0.01018	-0.07789	0.01345
12352	OX382151.1	1492853	-0.03153	0.04240	-0.35000	-0.00703	-0.42593	0.01567
12378	OX382151.1	1510288	0.02946	0.04675	0.00378	-0.00167	-0.02162	0.01934
12464	OX382151.1	1568621	0.65261	0.05902	0.63070	0.01626	0.62129	0.03069
12483	OX382151.1	1589956	-0.09191	0.06211	-0.09496	0.02216	-0.06364	0.03398
12580	OX382151.1	1653479	-0.09091	0.06653	-0.10000	0.03465	-0.07789	0.03910
12622	OX382151.1	1678712	0.19217	0.06642	0.20351	0.03719	0.20310	0.03909
12713	OX382151.1	1741086	0.20635	0.06259	0.20800	0.03620	0.17598	0.03419
12721	OX382151.1	1745542	-0.09375	0.06220	-0.10315	0.03586	-0.06876	0.03366
12766	OX382151.1	1782051	-0.11863	0.05882	-0.06749	0.03167	-0.12755	0.02876
12795	OX382151.1	1801888	0.11111	0.05743	0.02703	0.02899	-0.02984	0.02639
12820	OX382151.1	1824423	0.07763	0.05511	0.06126	0.02446	0.06350	0.02307
12836	OX382151.1	1836647	0.05263	0.05409	-0.03125	0.02182	-0.03125	0.02149
13147	OX382151.1	2080627	0.10923	0.02501	0.02003	-0.04375	0.01786	0.01164
13255	OX382151.1	2131645	-0.09375	0.02039	-0.10315	-0.03885	-0.06876	0.01154
13295	OX382151.1	2155252	0.00026	0.01856	-0.53846	-0.03492	0.02831	0.01113
13319	OX382151.1	2170977	0.02778	0.01737	0.02349	-0.03215	0.02407	0.01067
13332	OX382151.1	2179213	-0.03733	0.01676	-0.00401	-0.03067	-0.01090	0.01037
13423	OX382151.1	2232090	0.23575	0.01387	0.22452	-0.02042	0.22637	0.00904
13489	OX382151.1	2273893	-0.06329	0.01180	-0.06126	-0.01369	-0.06069	0.00756
13553	OX382151.1	2313119	0.18089	0.01069	0.05232	-0.00785	-0.01230	0.00726
13617	OX382151.1	2337724	-0.09091	0.01051	-0.10000	-0.00460	-0.07789	0.00755
13633	OX382151.1	2351188	0.01642	0.01080	0.14187	-0.00262	0.13707	0.00818
13634	OX382151.1	2351191	-0.02356	0.01080	0.01673	-0.00262	0.01744	0.00818
13684	OX382151.1	2372191	0.07763	0.01127	0.06126	0.00020	0.06350	0.00931
13692	OX382151.1	2376395	-0.11111	0.01141	-0.11429	0.00077	-0.16667	0.00960
13701	OX382151.1	2379884	-0.11111	0.01153	-0.12500	0.00126	-0.14337	0.00986
13731	OX382151.1	2401115	-0.06201	0.01250	-0.05419	0.00428	-0.01230	0.01175
13747	OX382151.1	2414619	0.01642	0.01347	0.01604	0.00653	0.01476	0.01347
13786	OX382151.1	2435342	0.10923	0.01496	0.02003	0.00997	0.01786	0.01634
13787	OX382151.1	2435345	-0.10092	0.01496	-0.11214	0.00997	-0.14666	0.01634
13798	OX382151.1	2436607	0.11111	0.01507	0.02703	0.01020	-0.03215	0.01654
13801	OX382151.1	2437573	-0.03231	0.01516	0.07668	0.01037	0.07486	0.01670
13826	OX382151.1	2452227	-0.05067	0.01647	-0.04316	0.01312	0.02626	0.01923
13877	OX382151.1	2489872	0.06977	0.02074	0.01478	0.02151	0.05323	0.02756
13904	OX382151.1	2505447	0.04382	0.02286	0.01008	0.02555	-0.01549	0.03171
13930	OX382151.1	2513917	0.19826	0.02422	0.16269	0.02800	0.16023	0.03423
13964	OX382151.1	2527792	-0.09375	0.02633	-0.10315	0.03208	-0.06876	0.03849
13973	OX382151.1	2528294	-0.07438	0.02640	-0.10000	0.03224	-0.08745	0.03865
14020	OX382151.1	2553835	0.07763	0.03066	0.06126	0.04043	0.06350	0.04717
14033	OX382151.1	2568370	-0.12676	0.03316	-0.14490	0.04536	-0.12821	0.05227
14100	OX382151.1	2599395	0.01038	0.03862	0.00990	0.05623	0.04241	0.06341
14141	OX382151.1	2638743	0.23575	0.04531	0.22452	0.06951	0.22637	0.07650
14155	OX382151.1	2651530	0.19826	0.04726	0.16269	0.07319	0.16023	0.08009
14174	OX382151.1	2668176	0.11017	0.04961	0.43299	0.07740	0.49930	0.08411
14239	OX382151.1	2717175	-0.11111	0.05490	-0.16471	0.08473	-0.17807	0.09032
14275	OX382151.1	2749348	0.03743	0.05736	0.59259	0.08533	0.59026	0.08992
14286	OX382151.1	2757899	-0.07811	0.05787	-0.06198	0.08495	-0.06254	0.08926
14341	OX382151.1	2794139	0.36185	0.05970	0.38218	0.08158	0.39009	0.08470
14415	OX382151.1	2835462	0.10923	0.06153	0.02003	0.07542	0.01786	0.07733
14424	OX382151.1	2839171	-0.09091	0.06170	-0.10000	0.07475	-0.07789	0.07656
14451	OX382151.1	2855148	0.35537	0.06225	0.35833	0.07195	0.35378	0.07332
14461	OX382151.1	2859007	-0.07280	0.06239	-0.07840	0.07127	-0.07866	0.07255
14475	OX382151.1	2870578	-0.12676	0.06285	-0.14490	0.06931	-0.19380	0.07032
14500	OX382151.1	2881267	-0.08387	0.06327	-0.09150	0.06751	-0.09160	0.06829
14526	OX382151.1	2901245	-0.08387	0.06391	-0.09150	0.06417	-0.09160	0.06459
14553	OX382151.1	2925185	0.02778	0.06477	0.02349	0.06053	0.02407	0.06048
14594	OX382151.1	2955421	0.10923	0.06560	0.02003	0.05632	0.01786	0.05583
14598	OX382151.1	2957486	0.19217	0.06566	0.20351	0.05607	0.20310	0.05556
14599	OX382151.1	2957489	0.10923	0.06566	0.02003	0.05607	0.01786	0.05556
14616	OX382151.1	2972114	0.04642	0.06581	0.05020	0.05410	0.08333	0.05342
14627	OX382151.1	2980324	0.13669	0.06608	0.03069	0.05327	0.00028	0.05246
14655	OX382151.1	2996063	0.15152	0.06601	0.13158	0.05124	0.17394	0.05029
14735	OX382151.1	3062999	0.20635	0.06221	0.20800	0.04197	0.13776	0.04066
14819	OX382151.1	3123316	-0.06329	0.05191	-0.06126	0.02989	-0.06069	0.02891
14904	OX382151.1	3181035	0.02041	0.03769	0.02041	0.01715	0.06024	0.01724
14918	OX382151.1	3187538	0.06977	0.03600	0.01478	0.01571	-0.02031	0.01593
15067	OX382151.1	3287163	0.10923	0.01598	0.02003	0.00101	0.01786	0.00316
15077	OX382151.1	3291071	0.01038	0.01569	0.00990	0.00094	0.04241	0.00313
15091	OX382151.1	3299186	-0.06329	0.01525	-0.06126	0.00076	-0.06069	0.00311
15160	OX382151.1	3345451	0.01642	0.01388	0.01604	0.00185	0.01476	0.00489
15162	OX382151.1	3345467	-0.06815	0.01388	-0.06136	0.00185	-0.06364	0.00489
15163	OX382151.1	3345470	-0.09091	0.01388	-0.10000	0.00185	-0.07789	0.00489
15349	OX382151.1	3483395	-0.11111	0.02948	-0.12500	0.02162	-0.14337	0.02849
15375	OX382151.1	3502839	0.18129	0.03308	0.45217	0.02518	0.39407	0.03296
15378	OX382151.1	3503422	0.09091	0.03319	0.01786	0.02528	0.00325	0.03309
15397	OX382151.1	3513830	0.13669	0.03503	0.03069	0.02703	0.04027	0.03541
15434	OX382151.1	3542092	0.10923	0.04032	0.02003	0.03191	0.01786	0.04173
15480	OX382151.1	3571931	-0.09191	0.04571	-0.09496	0.03669	-0.06364	0.04805
15496	OX382151.1	3581075	-0.11863	0.04739	-0.06749	0.03815	0.02874	0.04997
15589	OX382151.1	3640513	-0.09375	0.05523	-0.10315	0.04476	-0.06876	0.05912
15670	OX382151.1	3682879	-0.02479	0.05805	0.16667	0.04731	0.18750	0.06293
15677	OX382151.1	3686982	0.47020	0.05815	0.30736	0.04743	0.31250	0.06315
15734	OX382151.1	3727141	0.23575	0.05729	0.22452	0.04731	0.22637	0.06375
15738	OX382151.1	3728103	-0.09091	0.05723	-0.10000	0.04728	-0.07789	0.06373
15745	OX382151.1	3742757	0.10923	0.05601	0.02003	0.04663	0.01786	0.06326
15746	OX382151.1	3743305	0.21311	0.05596	0.05677	0.04660	0.10959	0.06323
15897	OX382151.1	3852714	-0.06329	0.03363	-0.06126	0.03111	-0.06069	0.04780
15903	OX382151.1	3853805	0.13876	0.03331	0.15385	0.03088	0.15217	0.04755
15908	OX382151.1	3862155	0.05427	0.03085	0.00359	0.02903	0.00325	0.04564
15967	OX382151.1	3893494	0.22814	0.02114	0.17041	0.02157	0.17394	0.03782
15972	OX382151.1	3893578	-0.04357	0.02111	0.05513	0.02155	0.05241	0.03780
16007	OX382151.1	3910604	0.00071	0.01563	0.12926	0.01720	0.16935	0.03320
16010	OX382151.1	3914712	-0.11111	0.01430	-0.12500	0.01613	0.02174	0.03206
16129	OX382151.1	3977067	-0.09091	-0.00598	-0.10000	-0.00100	-0.07789	0.01370
16173	OX382151.1	4014231	-0.06857	-0.01724	-0.02340	-0.01110	-0.02244	0.00259
16210	OX382151.1	4038821	-0.05329	-0.02401	-0.05537	-0.01751	-0.10297	-0.00462
16215	OX382151.1	4042695	-0.09375	-0.02506	-0.10315	-0.01852	-0.06876	-0.00575
16233	OX382151.1	4048848	-0.07892	-0.02671	-0.08578	-0.02011	-0.13043	-0.00753
16270	OX382151.1	4068698	-0.09375	-0.03182	-0.10315	-0.02513	-0.06876	-0.01316
16515	OX382152.1	58345	0.36185	0.04903	0.38218	0.09479	0.39009	0.11118
16596	OX382152.1	105487	0.03239	0.04324	0.16418	0.08576	0.16374	0.10177
16607	OX382152.1	107642	-0.09091	0.04299	-0.10000	0.08534	-0.07789	0.10133
16620	OX382152.1	114900	0.10923	0.04216	0.02003	0.08395	0.01786	0.09986
16640	OX382152.1	121806	0.01642	0.04138	0.01604	0.08263	0.01476	0.09845
16647	OX382152.1	126623	0.06977	0.04085	0.01478	0.08171	0.05323	0.09746
16660	OX382152.1	133756	-0.00147	0.04000	0.49391	0.08026	0.49470	0.09587
16688	OX382152.1	141477	-0.00012	0.03920	0.28540	0.07877	0.42570	0.09424
16729	OX382152.1	156550	0.41796	0.03766	0.43117	0.07592	0.43194	0.09110
16752	OX382152.1	164672	-0.09091	0.03688	-0.10000	0.07440	-0.07789	0.08941
16762	OX382152.1	165993	-0.09375	0.03676	-0.10315	0.07415	-0.06876	0.08913
16765	OX382152.1	167891	0.04328	0.03658	0.00816	0.07380	-0.00740	0.08874
16805	OX382152.1	188869	-0.06329	0.03478	-0.06126	0.06997	-0.06069	0.08432
16808	OX382152.1	191154	0.02778	0.03460	0.02349	0.06956	0.02407	0.08384
16868	OX382152.1	230601	0.19826	0.03198	0.16269	0.06291	0.16023	0.07584
16880	OX382152.1	238961	0.02357	0.03151	0.14737	0.06156	0.17500	0.07413
16900	OX382152.1	250019	0.01235	0.03104	-0.05882	0.05991	-0.12304	0.07200
16901	OX382152.1	250022	-0.02610	0.03104	0.00943	0.05991	0.01107	0.07200
16932	OX382152.1	264692	-0.10891	0.03056	-0.12112	0.05786	0.09206	0.06925
16964	OX382152.1	288567	-0.06201	0.03016	-0.05419	0.05491	-0.01230	0.06505
16978	OX382152.1	294897	-0.03030	0.03022	-0.03125	0.05421	-0.02143	0.06407
17019	OX382152.1	313029	-0.10092	0.03036	-0.11214	0.05241	-0.15643	0.06124
17039	OX382152.1	317904	-0.01281	0.03045	0.20651	0.05196	0.21067	0.06048
17060	OX382152.1	332341	0.06977	0.03080	0.01478	0.05080	-0.02031	0.05844
17148	OX382152.1	384301	0.09091	0.03319	0.01786	0.04806	0.00325	0.05233
17194	OX382152.1	400159	0.03309	0.03417	0.03522	0.04759	0.03574	0.05084
17207	OX382152.1	409192	0.17768	0.03476	0.17768	0.04738	0.17816	0.05006
17234	OX382152.1	430285	-0.11111	0.03617	-0.12500	0.04699	-0.14337	0.04837
17263	OX382152.1	442412	0.10923	0.03723	0.02003	0.04704	0.01786	0.04774
17299	OX382152.1	457084	0.10923	0.03828	0.02003	0.04691	0.01786	0.04681
17311	OX382152.1	462166	0.07763	0.03864	0.06126	0.04687	0.06350	0.04651
17326	OX382152.1	471037	0.01642	0.03926	0.01604	0.04679	0.01476	0.04600
17331	OX382152.1	472958	-0.06329	0.03940	-0.06126	0.04677	-0.06069	0.04589
17336	OX382152.1	476406	0.16143	0.03964	0.52876	0.04674	0.53571	0.04570
17435	OX382152.1	551615	0.09091	0.04432	0.01786	0.04541	0.00325	0.04227
17477	OX382152.1	577483	-0.11628	0.04571	-0.13089	0.04461	-0.17998	0.04142
17506	OX382152.1	591307	0.07763	0.04656	0.06126	0.04393	0.06350	0.04091
17560	OX382152.1	619644	0.09419	0.04834	0.08731	0.04322	0.04188	0.04081
17574	OX382152.1	635055	0.04050	0.04923	0.02940	0.04282	-0.00862	0.04096
17648	OX382152.1	687825	0.01229	0.05295	0.08333	0.04235	0.07143	0.04309
17653	OX382152.1	688425	-0.07280	0.05300	-0.07840	0.04235	-0.07866	0.04312
17728	OX382152.1	739873	0.24153	0.05650	0.05988	0.04280	0.25000	0.04620
17766	OX382152.1	763657	0.04382	0.05733	0.01008	0.04283	-0.02984	0.04735
17872	OX382152.1	810444	0.01907	0.05605	0.00194	0.04092	-0.02812	0.04665
17881	OX382152.1	815006	0.03309	0.05570	0.03522	0.04060	0.03574	0.04637
17971	OX382152.1	884517	-0.09375	0.04481	-0.10315	0.03101	-0.06876	0.03605
17973	OX382152.1	884540	0.57402	0.04480	0.58695	0.03101	0.60011	0.03605
18109	OX382152.1	983783	-0.07280	0.01865	-0.07840	0.00625	-0.07866	0.00784
18148	OX382152.1	1009353	-0.06329	0.01209	-0.06126	-0.00044	-0.06069	0.00045
18150	OX382152.1	1009424	0.01642	0.01207	0.01604	-0.00046	0.01476	0.00043
18152	OX382152.1	1010449	-0.11628	0.01182	-0.13089	-0.00072	-0.08686	0.00014
18155	OX382152.1	1012159	0.01389	0.01141	-0.00750	-0.00116	-0.06944	-0.00033
18247	OX382152.1	1070892	-0.01010	-0.00103	-0.00800	-0.01496	-0.05769	-0.01438
18248	OX382152.1	1070895	-0.12676	-0.00103	-0.14490	-0.01496	-0.12821	-0.01438
18322	OX382152.1	1124302	0.01818	-0.00844	-0.01316	-0.02421	-0.02984	-0.02190
18472	OX382152.1	1237077	0.10923	-0.01379	0.02003	-0.02985	0.01786	-0.01773
18508	OX382152.1	1271073	-0.07601	-0.01390	-0.07753	-0.02822	-0.04839	-0.01272
18530	OX382152.1	1286878	-0.03120	-0.01383	-0.03413	-0.02696	-0.00455	-0.01016
18633	OX382152.1	1385647	-0.11863	-0.01046	-0.06749	-0.01219	0.02874	0.00709
18643	OX382152.1	1388352	-0.03120	-0.01026	-0.03413	-0.01161	-0.00455	0.00760
18755	OX382152.1	1455432	0.10923	-0.00460	0.02003	0.00376	0.01786	0.01956
18828	OX382152.1	1484164	-0.09375	-0.00155	-0.10315	0.01077	-0.06876	0.02437
18863	OX382152.1	1503520	-0.09375	0.00103	-0.10315	0.01544	-0.06876	0.02744
18885	OX382152.1	1512691	0.10791	0.00202	0.11226	0.01749	0.14754	0.02867
18916	OX382152.1	1529775	-0.07811	0.00393	-0.06198	0.02121	-0.06254	0.03086
18970	OX382152.1	1570553	-0.06815	0.00808	-0.06136	0.02825	-0.06364	0.03405
19007	OX382152.1	1608270	-0.09790	0.01105	-0.07616	0.03159	-0.06122	0.03411
19008	OX382152.1	1608273	0.20241	0.01105	0.49418	0.03159	0.41949	0.03411
19085	OX382152.1	1658181	0.33291	0.01399	0.38778	0.03045	0.38924	0.02967
19196	OX382152.1	1734573	-0.11628	0.01850	-0.13089	0.01787	-0.11429	0.01593
19271	OX382152.1	1773489	-0.11111	0.02236	-0.12500	0.01001	-0.17857	0.00940
19272	OX382152.1	1773492	-0.11111	0.02236	-0.12500	0.01001	-0.17857	0.00940
19314	OX382152.1	1810143	-0.01010	0.02746	-0.00800	0.00379	-0.06122	0.00525
19352	OX382152.1	1855298	-0.11628	0.03490	-0.13089	-0.00177	-0.11429	0.00255
19354	OX382152.1	1857302	-0.09091	0.03523	-0.10000	-0.00197	-0.07789	0.00248
19449	OX382152.1	1922568	-0.05263	0.04400	-0.03687	-0.00801	0.04737	0.00020
19458	OX382152.1	1927208	0.11111	0.04442	0.02703	-0.00846	0.03140	-0.00005
19459	OX382152.1	1927211	0.10923	0.04442	0.02003	-0.00846	0.01786	-0.00005
19483	OX382152.1	1941579	0.39306	0.04539	0.19061	-0.01000	0.25000	-0.00102
19488	OX382152.1	1943637	0.15916	0.04549	0.03327	-0.01024	0.08333	-0.00119
19589	OX382152.1	1996449	0.20635	0.04451	0.20800	-0.01819	0.13776	-0.00770
19666	OX382152.1	2049543	-0.08889	0.03528	-0.09756	-0.03020	-0.12294	-0.01970
19761	OX382152.1	2124424	-0.05495	0.01304	-0.53125	-0.04970	-0.42821	-0.04071
19795	OX382152.1	2136206	0.03309	0.00966	0.03522	-0.05192	0.03574	-0.04323
19848	OX382152.1	2166064	-0.07280	0.00222	-0.07840	-0.05589	-0.07866	-0.04790
19889	OX382152.1	2199364	-0.09091	-0.00310	-0.10000	-0.05693	-0.07789	-0.04946
19994	OX382152.1	2265987	-0.10414	-0.00286	-0.11576	-0.04887	-0.17098	-0.04112
20102	OX382152.1	2309846	-0.10092	0.00366	-0.11214	-0.03876	-0.15643	-0.03009
20163	OX382152.1	2382076	-0.07280	0.01737	-0.07840	-0.02199	-0.07866	-0.01137
20199	OX382152.1	2405110	0.01907	0.02150	0.00194	-0.01725	-0.02812	-0.00609
20200	OX382152.1	2407403	0.02180	0.02196	-0.02502	-0.01677	0.00310	-0.00555
20240	OX382152.1	2423210	0.09091	0.02505	0.01786	-0.01351	0.05797	-0.00194
20250	OX382152.1	2429966	0.24153	0.02635	0.05988	-0.01216	0.25000	-0.00044
20273	OX382152.1	2440628	0.07763	0.02837	0.06126	-0.01006	0.06350	0.00185
20296	OX382152.1	2450803	0.06977	0.03016	0.07728	-0.00825	0.06168	0.00389
20329	OX382152.1	2475915	0.13669	0.03488	0.03069	-0.00342	0.00028	0.00899
20333	OX382152.1	2476223	-0.06329	0.03494	-0.06126	-0.00337	-0.06069	0.00905
20388	OX382152.1	2498671	-0.07811	0.03919	-0.06198	0.00091	-0.06254	0.01344
20646	OX382152.1	2712222	0.19826	0.08169	0.16269	0.03898	0.16023	0.04619
20668	OX382152.1	2720289	0.04050	0.08275	0.02940	0.03967	0.18532	0.04658
20690	OX382152.1	2737164	0.12187	0.08417	0.13070	0.04037	0.06250	0.04647
20706	OX382152.1	2744534	0.25926	0.08463	0.12903	0.04051	0.02838	0.04624
20722	OX382152.1	2752483	-0.09375	0.08501	-0.10315	0.04054	-0.06876	0.04587
20739	OX382152.1	2765816	0.10923	0.08562	0.02003	0.04050	0.01786	0.04520
21055	OX382152.1	2997140	0.04328	0.05124	0.00816	0.00082	0.00325	-0.00986
21093	OX382152.1	3016314	0.10923	0.04755	0.02003	-0.00191	0.01786	-0.01355
21140	OX382152.1	3044455	-0.11111	0.04324	-0.12500	-0.00417	-0.17857	-0.01698
21208	OX382152.1	3093283	0.10923	0.03722	0.02003	-0.00515	0.01786	-0.01939
21471	OX382152.1	3262140	0.09419	0.03724	0.08731	0.01404	0.04188	-0.00171
21489	OX382152.1	3270314	-0.09091	0.03835	-0.10000	0.01579	-0.07789	0.00012
21502	OX382152.1	3272630	0.02499	0.03868	0.01673	0.01629	0.01744	0.00065
21555	OX382152.1	3310267	-0.02564	0.04486	-0.04244	0.02493	-0.08663	0.00998
21557	OX382152.1	3310925	0.11111	0.04499	0.02703	0.02510	-0.01316	0.01016
21621	OX382152.1	3343133	-0.11111	0.05161	-0.12500	0.03331	-0.14337	0.01927
21667	OX382152.1	3368401	0.07763	0.05766	0.06126	0.04019	0.06350	0.02716
21718	OX382152.1	3397921	-0.03973	0.06374	-0.00293	0.04709	-0.05625	0.03585
21879	OX382152.1	3491567	0.40269	0.07559	0.39250	0.05997	0.39117	0.05610
21892	OX382152.1	3499025	0.07763	0.07570	0.06126	0.06005	0.06350	0.05696
21931	OX382152.1	3520393	0.06977	0.07452	0.01478	0.05873	0.01894	0.05782
21940	OX382152.1	3522384	0.23575	0.07433	0.22452	0.05853	0.22637	0.05782
22134	OX382152.1	3610056	0.02041	0.05571	0.02041	0.03844	0.03883	0.04723
22211	OX382152.1	3659552	-0.11111	0.04160	-0.12500	0.02305	-0.14337	0.03649
22249	OX382152.1	3685437	-0.09039	0.03508	-0.08548	0.01585	-0.04762	0.03124
22302	OX382152.1	3728426	-0.09091	0.02668	-0.10000	0.00644	-0.07789	0.02426
22434	OX382152.1	3797027	-0.11111	0.01915	-0.12500	-0.00203	-0.17857	0.01749
22439	OX382152.1	3799640	0.08046	0.01896	0.02141	-0.00224	0.03532	0.01730
22447	OX382152.1	3806620	0.21311	0.01850	0.05677	-0.00275	0.10959	0.01681
22459	OX382152.1	3812175	0.41796	0.01816	0.43117	-0.00313	0.43194	0.01643
22469	OX382152.1	3819282	-0.10092	0.01768	-0.11214	-0.00364	-0.07843	0.01593
22471	OX382152.1	3819317	-0.11628	0.01768	-0.13089	-0.00364	0.08333	0.01592
22508	OX382152.1	3836299	-0.11111	0.01685	-0.11429	-0.00450	-0.13372	0.01494
22612	OX382152.1	3903419	0.02041	0.01434	0.02041	-0.00665	-0.03399	0.01146
22633	OX382152.1	3911387	-0.07280	0.01404	-0.07840	-0.00685	-0.07866	0.01102
22932	OX382153.1	87788	-0.07811	0.00412	-0.06198	-0.00851	-0.06254	0.01760
22981	OX382153.1	120767	0.21028	0.00503	0.11338	-0.00641	0.30270	0.01658
22982	OX382153.1	120851	-0.03030	0.00503	-0.03125	-0.00640	-0.03125	0.01658
23169	OX382153.1	242898	-0.07280	0.01109	-0.07840	0.00514	-0.07866	0.01863
23176	OX382153.1	244043	-0.09091	0.01116	-0.07843	0.00526	-0.05848	0.01869
23244	OX382153.1	274403	-0.12676	0.01275	-0.14490	0.00840	-0.19380	0.02031
23269	OX382153.1	289875	0.07763	0.01353	0.06126	0.00998	0.06350	0.02125
23273	OX382153.1	295481	-0.08151	0.01391	-0.02962	0.01064	-0.02997	0.02168
23311	OX382153.1	320356	-0.09091	0.01502	-0.10000	0.01305	-0.07789	0.02327
23335	OX382153.1	334656	0.10923	0.01556	0.02003	0.01433	0.01786	0.02416
23362	OX382153.1	347775	-0.08387	0.01597	-0.09150	0.01542	-0.09160	0.02496
23363	OX382153.1	347778	0.51585	0.01597	0.41531	0.01542	0.41791	0.02496
23377	OX382153.1	358474	-0.11628	0.01624	-0.13089	0.01624	-0.08686	0.02557
23462	OX382153.1	402256	0.13726	0.01671	0.36422	0.01886	0.36413	0.02763
23475	OX382153.1	421700	-0.02564	0.01657	-0.02857	0.01959	-0.00000	0.02824
23538	OX382153.1	463011	-0.09091	0.01565	-0.10000	0.02026	-0.07789	0.02885
23558	OX382153.1	471455	-0.06329	0.01536	-0.06126	0.02023	-0.06069	0.02884
23563	OX382153.1	475006	0.01642	0.01514	0.01604	0.02021	0.01476	0.02881
23889	OX382153.1	702740	-0.09375	0.02147	-0.10315	0.02211	-0.06876	0.03082
23937	OX382153.1	741077	0.15152	0.02688	0.13158	0.02570	0.11728	0.03355
24209	OX382153.1	912254	0.10791	0.03393	0.11226	0.02517	0.14754	0.02688
24233	OX382153.1	924834	-0.05722	0.03395	0.03084	0.02444	0.02626	0.02574
24322	OX382153.1	972592	0.11111	0.03314	0.02703	0.02063	0.03140	0.02057
24347	OX382153.1	978972	0.19217	0.03303	0.20351	0.02010	0.20310	0.01987
24349	OX382153.1	979119	-0.09091	0.03303	-0.10000	0.02009	-0.07789	0.01985
24399	OX382153.1	1006831	-0.07811	0.03252	-0.06198	0.01773	-0.06254	0.01682
24416	OX382153.1	1021975	-0.03030	0.03224	-0.03125	0.01641	-0.02143	0.01519
24428	OX382153.1	1027146	0.01642	0.03215	0.01604	0.01596	0.01476	0.01463
24456	OX382153.1	1049886	-0.06329	0.03169	-0.06126	0.01388	-0.06069	0.01213
24468	OX382153.1	1057108	0.36508	0.03155	0.18699	0.01323	0.19863	0.01137
24486	OX382153.1	1068122	0.11111	0.03134	0.02703	0.01224	-0.01316	0.01022
24507	OX382153.1	1075909	-0.01010	0.03119	-0.00800	0.01154	-0.01418	0.00941
24547	OX382153.1	1104365	-0.11111	0.03083	-0.12500	0.00912	-0.17857	0.00674
24562	OX382153.1	1115598	0.00335	0.03066	0.25787	0.00815	0.25521	0.00568
24582	OX382153.1	1125234	0.09091	0.03047	0.01786	0.00728	0.00325	0.00477
24612	OX382153.1	1148550	0.01642	0.03029	0.01604	0.00543	0.01476	0.00287
24632	OX382153.1	1158209	0.10923	0.03026	0.02003	0.00471	0.01786	0.00214
24647	OX382153.1	1170299	0.10923	0.03020	0.02003	0.00378	0.01786	0.00124
24652	OX382153.1	1171990	-0.07720	0.03019	-0.17051	0.00365	-0.12304	0.00112
24653	OX382153.1	1171993	0.04382	0.03019	0.01008	0.00365	-0.01549	0.00112
24656	OX382153.1	1173132	-0.09091	0.03019	-0.07843	0.00357	-0.05848	0.00104
24691	OX382153.1	1198715	0.08046	0.03012	0.07300	0.00172	-0.01813	-0.00063
24730	OX382153.1	1221389	-0.06329	0.03056	-0.06126	0.00054	-0.06069	-0.00159
24733	OX382153.1	1222038	0.10923	0.03057	0.02003	0.00051	0.01786	-0.00161
24761	OX382153.1	1242479	0.06977	0.03131	0.01478	-0.00013	0.05323	-0.00198
24809	OX382153.1	1265328	-0.12676	0.03231	-0.14490	-0.00058	-0.19380	-0.00207
24871	OX382153.1	1297278	0.10923	0.03463	0.02003	-0.00007	0.01786	-0.00098
24911	OX382153.1	1318615	-0.07280	0.03721	-0.07840	0.00147	-0.07866	0.00100
24914	OX382153.1	1320066	0.04328	0.03740	0.00816	0.00159	0.00325	0.00115
24934	OX382153.1	1327272	0.13669	0.03838	0.03069	0.00224	0.08333	0.00194
24962	OX382153.1	1343905	0.01642	0.04086	0.01604	0.00406	0.01476	0.00407
25097	OX382153.1	1477972	-0.11628	0.07419	-0.13089	0.03449	-0.17998	0.03505
25106	OX382153.1	1488772	0.13669	0.07692	0.03069	0.03722	0.08333	0.03764
25188	OX382153.1	1541634	0.05524	0.08826	0.01265	0.04853	0.03460	0.04806
25206	OX382153.1	1547226	0.32112	0.08921	0.29219	0.04946	0.33219	0.04888
25259	OX382153.1	1575122	-0.06329	0.09309	-0.06126	0.05305	-0.06069	0.05206
25264	OX382153.1	1579510	0.19826	0.09344	0.16269	0.05345	0.16023	0.05240
25283	OX382153.1	1583502	-0.12676	0.09385	-0.14490	0.05384	-0.19380	0.05272
25289	OX382153.1	1585262	0.01642	0.09401	0.01604	0.05400	0.01476	0.05285
25319	OX382153.1	1597869	0.19826	0.09507	0.16269	0.05499	0.16023	0.05365
25345	OX382153.1	1618821	0.09091	0.09618	0.01786	0.05600	0.00325	0.05444
25405	OX382153.1	1653169	0.36508	0.09671	0.18699	0.05617	0.15411	0.05437
25428	OX382153.1	1672052	0.23575	0.09609	0.22452	0.05535	0.22637	0.05350
25441	OX382153.1	1677057	0.09091	0.09584	0.01786	0.05504	0.00325	0.05318
25499	OX382153.1	1712661	-0.11111	0.09296	-0.12500	0.05177	-0.14337	0.05004
25548	OX382153.1	1746347	-0.03030	0.08849	0.08333	0.04717	0.08333	0.04590
25563	OX382153.1	1766431	0.41796	0.08512	0.43117	0.04390	0.43194	0.04302
25567	OX382153.1	1768514	0.10791	0.08474	0.11226	0.04354	0.14754	0.04271
25596	OX382153.1	1782380	-0.08387	0.08214	-0.09150	0.04112	-0.09160	0.04060
25628	OX382153.1	1808547	0.10923	0.07638	0.02003	0.03599	0.01786	0.03624
25629	OX382153.1	1808550	0.10923	0.07638	0.02003	0.03599	0.01786	0.03624
25632	OX382153.1	1811682	0.07763	0.07563	0.06126	0.03534	0.06350	0.03571
25637	OX382153.1	1814983	-0.00408	0.07483	-0.29652	0.03466	-0.29843	0.03514
25736	OX382153.1	1894228	-0.09790	0.05235	-0.07616	0.01753	-0.12428	0.02150
25761	OX382153.1	1925630	0.10923	0.04245	0.02003	0.01090	0.01786	0.01650
25828	OX382153.1	1989850	0.19217	0.02308	0.20351	-0.00110	0.20310	0.00758
25862	OX382153.1	2017956	-0.06329	0.01555	-0.06126	-0.00568	-0.06069	0.00402
25878	OX382153.1	2024524	-0.07892	0.01399	-0.08578	-0.00662	0.04920	0.00329
25881	OX382153.1	2025333	-0.07811	0.01386	-0.06198	-0.00669	-0.06254	0.00326
25908	OX382153.1	2051189	0.10791	0.00800	0.11226	-0.01033	0.14754	0.00034
25919	OX382153.1	2058703	-0.06329	0.00654	-0.06126	-0.01122	-0.06069	-0.00042
25980	OX382153.1	2104528	-0.07280	-0.00062	-0.07840	-0.01558	-0.07866	-0.00429
26068	OX382153.1	2148510	-0.06329	-0.00431	-0.06126	-0.01808	-0.06069	-0.00681
26079	OX382153.1	2155034	0.10923	-0.00458	0.02003	-0.01826	0.01786	-0.00702
26107	OX382153.1	2168811	-0.01299	-0.00484	-0.00833	-0.01839	-0.01549	-0.00722
26110	OX382153.1	2169860	-0.09375	-0.00486	-0.10315	-0.01840	-0.06876	-0.00723
26255	OX382153.1	2256646	0.01299	0.00297	0.00532	-0.01152	-0.00663	-0.00079
26538	OX382153.1	2430234	-0.00907	0.06847	-0.03404	0.04712	0.04407	0.05796
26685	OX382153.1	2518872	0.06977	0.08464	0.01478	0.05923	-0.02031	0.06784
26689	OX382153.1	2522405	0.19217	0.08490	0.20351	0.05932	0.20310	0.06784
26701	OX382153.1	2534386	0.19217	0.08537	0.20351	0.05928	0.20310	0.06748
26706	OX382153.1	2536945	-0.09375	0.08549	-0.10315	0.05927	-0.06876	0.06740
26752	OX382153.1	2568911	0.09750	0.08606	0.10016	0.05824	0.10176	0.06553
26781	OX382153.1	2588056	0.21311	0.08572	0.05677	0.05688	0.10330	0.06367
26956	OX382153.1	2659660	0.03522	0.08078	0.00331	0.04766	0.03883	0.05281
26970	OX382153.1	2669866	-0.07811	0.07955	-0.06198	0.04580	-0.06254	0.05075
26990	OX382153.1	2681398	0.23575	0.07801	0.22452	0.04356	0.22637	0.04829
26992	OX382153.1	2681784	0.17768	0.07795	0.17768	0.04348	0.17816	0.04821
26993	OX382153.1	2683837	0.09091	0.07766	0.01786	0.04306	0.00325	0.04775
27036	OX382153.1	2704961	-0.07106	0.07438	-0.06248	0.03854	-0.13372	0.04286
27141	OX382153.1	2780246	0.03309	0.05819	0.03522	0.01913	0.03574	0.01627
27142	OX382153.1	2780249	0.21311	0.05819	0.05677	0.01913	0.15050	0.01627
27253	OX382153.1	2838846	0.33492	0.04116	0.21549	0.00205	0.18565	-0.01189
27280	OX382153.1	2848971	-0.03477	0.03803	-0.17397	-0.00083	-0.14593	-0.01775
27301	OX382153.1	2869127	0.03331	0.03168	-0.04244	-0.00647	-0.08663	-0.03058
27302	OX382153.1	2869130	-0.07280	0.03168	-0.07840	-0.00647	-0.07866	-0.03058
27378	OX382153.1	2918652	-0.06329	0.01565	-0.06126	-0.01940	-0.06069	-0.07014
27382	OX382153.1	2926312	-0.06329	0.01322	-0.06126	-0.02122	-0.06069	-0.07742
27481	OX382153.1	2982645	0.01642	-0.00416	0.01604	-0.03336	0.01476	-0.14164
27483	OX382153.1	2984012	-0.09375	-0.00454	-0.10315	-0.03361	-0.06876	-0.14339
27517	OX382153.1	3006271	-0.08387	-0.01041	-0.09150	-0.03727	-0.09160	-0.17287
27727	OX382153.1	3163171	0.09091	-0.03611	0.01786	-0.05049	0.05797	-0.31077
27763	OX382153.1	3181115	-0.02177	-0.03707	0.00000	-0.05060	-333333	-0.30730
27789	OX382153.1	3198804	-0.11111	-0.03767	-0.11429	-0.05042	0.02687	-0.29981
27830	OX382153.1	3235499	-0.06329	-0.03808	-0.06126	-0.04933	-0.06069	-0.27518
27840	OX382153.1	3238657	0.06145	-0.03801	0.01079	-0.04915	0.01266	-0.27246
27855	OX382153.1	3246849	-0.09375	-0.03777	-0.10315	-0.04863	-0.06876	-0.26510
27879	OX382153.1	3265768	-0.07280	-0.03693	-0.07840	-0.04716	-0.07866	-0.24670
27913	OX382153.1	3282700	-0.11111	-0.03579	-0.12500	-0.04548	-0.17857	-0.22896
27990	OX382153.1	3330698	-0.07811	-0.03066	-0.06198	-0.03880	-0.06254	-0.17600
28016	OX382153.1	3347859	-0.07280	-0.02801	-0.07840	-0.03575	-0.07866	-0.15693
28071	OX382153.1	3389323	-0.09091	-0.02032	-0.10000	-0.02719	-0.07789	-0.11380
28111	OX382153.1	3415363	-0.09191	-0.01487	-0.09496	-0.02131	-0.06364	-0.08974
28191	OX382153.1	3455506	0.19826	-0.00607	0.16269	-0.01208	0.16023	-0.05867
28218	OX382153.1	3467531	-0.06329	-0.00343	-0.06126	-0.00935	-0.06069	-0.05080
28286	OX382153.1	3496944	-0.02084	0.00261	0.02430	-0.00322	0.02407	-0.03446
28349	OX382153.1	3552490	0.23643	0.01227	0.23793	0.00630	0.12923	-0.01338
28402	OX382153.1	3578290	-0.09091	0.01578	-0.10000	0.00965	-0.07789	-0.00711
28407	OX382153.1	3580300	-0.06329	0.01602	-0.06126	0.00989	-0.06069	-0.00669
28416	OX382153.1	3584499	0.06977	0.01652	0.01478	0.01036	0.01894	-0.00586
28425	OX382153.1	3586718	0.23575	0.01678	0.22452	0.01060	0.22637	-0.00544
28443	OX382153.1	3593251	-0.11111	0.01751	-0.12500	0.01128	-0.17857	-0.00427
28537	OX382153.1	3643451	-0.01299	0.02184	-0.00833	0.01522	-0.01549	0.00510
28601	OX382154.1	46131	-0.06329	-0.00325	-0.06126	-0.01547	-0.06069	-0.00192
28645	OX382154.1	61916	-0.11111	-0.00275	-0.12500	-0.01495	-0.17857	-0.00119
28712	OX382154.1	111766	0.02041	-0.00214	0.00415	-0.01421	0.08675	-0.00008
28721	OX382154.1	119826	0.11111	-0.00228	0.02703	-0.01427	-0.03215	-0.00015
28736	OX382154.1	130683	-0.06329	-0.00244	-0.06126	-0.01438	-0.06069	-0.00026
28737	OX382154.1	130686	0.02041	-0.00244	0.02041	-0.01438	0.15385	-0.00026
28783	OX382154.1	158394	0.03309	-0.00300	0.03522	-0.01486	0.03574	-0.00082
28811	OX382154.1	172047	-0.06201	-0.00355	-0.05419	-0.01534	-0.01230	-0.00140
28823	OX382154.1	178009	0.23575	-0.00383	0.22452	-0.01558	0.22637	-0.00171
28858	OX382154.1	194847	-0.09091	-0.00477	-0.10000	-0.01641	-0.07789	-0.00275
28869	OX382154.1	200317	0.01861	-0.00511	-0.00240	-0.01672	-0.00455	-0.00315
28970	OX382154.1	259202	0.05352	-0.00923	0.00624	-0.02070	0.04376	-0.00849
28990	OX382154.1	272331	-0.07280	-0.01036	-0.07840	-0.02168	-0.07866	-0.00987
29088	OX382154.1	329384	-0.09091	-0.01405	-0.07843	-0.02552	-0.05848	-0.01566
29150	OX382154.1	372446	-0.11111	-0.01363	-0.12500	-0.02586	-0.17857	-0.01747
29160	OX382154.1	377591	-0.06329	-0.01336	-0.06126	-0.02567	-0.06069	-0.01744
29454	OX382154.1	567258	-0.07811	0.03304	-0.06198	0.01732	-0.06254	0.02413
29494	OX382154.1	589874	0.15152	0.03666	0.13158	0.02159	0.17394	0.02827
29520	OX382154.1	596639	0.05911	0.03732	-0.04905	0.02219	-0.01418	0.02912
29670	OX382154.1	672213	0.13669	0.04155	0.03069	0.02880	0.00028	0.03565
29683	OX382154.1	682973	0.23575	0.04173	0.22452	0.02920	0.22637	0.03607
29702	OX382154.1	695595	0.10923	0.04191	0.02003	0.02957	0.01786	0.03647
29731	OX382154.1	716900	-0.09091	0.04228	-0.10000	0.02998	-0.07789	0.03697
29736	OX382154.1	722146	0.00587	0.04239	0.15229	0.03004	0.15217	0.03708
29743	OX382154.1	731483	0.03837	0.04267	0.05970	0.03020	0.05921	0.03734
29819	OX382154.1	779282	-0.07071	0.04468	-0.05769	0.03017	-0.05978	0.03809
29854	OX382154.1	803445	-0.03030	0.04648	-0.03125	0.02987	-0.02143	0.03845
29862	OX382154.1	807806	0.01642	0.04685	0.01604	0.02980	0.01476	0.03852
29880	OX382154.1	822743	-0.09091	0.04819	-0.10000	0.02945	-0.07789	0.03873
29882	OX382154.1	823272	-0.00465	0.04824	0.01673	0.02943	0.01744	0.03873
29899	OX382154.1	831753	-0.09191	0.04941	-0.09496	0.02940	-0.06364	0.03901
29937	OX382154.1	861497	0.23575	0.05310	0.22452	0.02834	0.22637	0.03931
30085	OX382154.1	918727	0.10923	0.06163	0.02003	0.02462	0.01786	0.03900
30160	OX382154.1	956538	0.53188	0.06656	0.55302	0.02023	0.50960	0.03709
30183	OX382154.1	972029	-0.08387	0.06824	-0.09150	0.01810	-0.09160	0.03584
30250	OX382154.1	1020903	0.16612	0.07086	0.04218	0.01040	0.03883	0.03022
30257	OX382154.1	1041197	-0.10034	0.07023	-0.45455	0.00689	-0.15456	0.02700
30277	OX382154.1	1061948	0.10923	0.06873	0.02003	0.00363	0.01786	0.02367
30392	OX382154.1	1156257	0.10923	0.05229	0.02003	-0.00500	0.01786	0.01104
30500	OX382154.1	1202334	0.13669	0.04277	0.03069	-0.00538	0.00028	0.00822
30525	OX382154.1	1223327	-0.00000	0.03861	-0.00000	-0.00484	0.03117	0.00787
30552	OX382154.1	1237288	-0.07280	0.03605	-0.07840	-0.00427	-0.07866	0.00797
30558	OX382154.1	1242593	0.10923	0.03507	0.02003	-0.00403	0.01786	0.00804
30599	OX382154.1	1261252	-0.07089	0.03183	-0.06668	-0.00303	-0.05978	0.00857
30615	OX382154.1	1269962	-0.07811	0.03036	-0.06198	-0.00248	-0.06254	0.00894
30627	OX382154.1	1277011	0.33492	0.02931	0.21549	-0.00195	0.18565	0.00934
30694	OX382154.1	1336705	0.06061	0.02042	0.08333	0.00320	0.10176	0.01391
30715	OX382154.1	1346684	-0.09195	0.01931	-0.10769	0.00449	-0.05698	0.01516
30777	OX382154.1	1382466	-0.01070	0.01529	-0.03286	0.00925	-0.02106	0.01986
30781	OX382154.1	1383276	0.06145	0.01521	0.01079	0.00937	0.01266	0.01998
30804	OX382154.1	1392827	-0.06329	0.01426	-0.06126	0.01079	-0.06069	0.02138
30808	OX382154.1	1396318	-0.07280	0.01392	-0.07840	0.01133	-0.07866	0.02190
30812	OX382154.1	1397061	-0.07892	0.01385	-0.08578	0.01144	0.04920	0.02201
30838	OX382154.1	1413079	0.06977	0.01209	0.01478	0.01370	-0.02031	0.02423
30870	OX382154.1	1458504	0.10923	0.00845	0.02003	0.02147	0.01786	0.03158
30919	OX382154.1	1513096	-0.11111	0.00437	-0.12500	0.03033	-0.14337	0.03921
30959	OX382154.1	1533385	-0.09375	0.00287	-0.10315	0.03259	-0.06876	0.04090
30969	OX382154.1	1540839	0.15361	0.00235	0.81667	0.03332	0.82518	0.04139
30975	OX382154.1	1543812	0.12727	0.00215	0.13725	0.03358	0.15322	0.04156
31002	OX382154.1	1562884	-0.06329	0.00074	-0.06126	0.03476	-0.06069	0.04224
31128	OX382154.1	1636909	-0.07280	-0.00433	-0.07840	0.03204	-0.07866	0.03723
31263	OX382154.1	1731365	-0.06329	-0.00889	-0.06126	0.01272	-0.06069	0.01878
31299	OX382154.1	1753396	-0.02928	-0.00963	-0.03230	0.00692	-0.07754	0.01447
31303	OX382154.1	1755508	-0.08387	-0.00968	-0.09150	0.00639	-0.09160	0.01411
31341	OX382154.1	1793797	0.19217	-0.01065	0.20351	-0.00269	0.20310	0.00898
31490	OX382154.1	1879502	0.04382	-0.01128	0.01008	-0.01693	-0.03366	0.00740
31509	OX382154.1	1888195	-0.08235	-0.01116	-0.13485	-0.01779	-0.06944	0.00787
31617	OX382154.1	1963645	-0.03120	-0.00775	-0.03413	-0.02051	-0.00455	0.01457
31629	OX382154.1	1972397	-0.08387	-0.00711	-0.09150	-0.02039	-0.09160	0.01542
31654	OX382154.1	1999685	-0.11628	-0.00527	-0.13089	-0.02048	0.08333	0.01726
31724	OX382154.1	2043378	0.04762	-0.00149	0.14737	-0.01792	0.24737	0.02115
31731	OX382154.1	2046622	-0.11628	-0.00123	-0.13089	-0.01773	0.08333	0.02137
31777	OX382154.1	2075268	0.14286	0.00068	0.12500	-0.01631	-0.16735	0.02298
31834	OX382154.1	2140070	-0.03477	0.00251	-0.17397	-0.01350	-0.14593	0.02513
31856	OX382154.1	2157482	0.10791	0.00258	0.11226	-0.01283	0.14754	0.02556
31859	OX382154.1	2164705	0.39306	0.00237	0.19061	-0.01270	0.25000	0.02568
31893	OX382154.1	2189743	-0.09375	0.00099	-0.10315	-0.01251	-0.06876	0.02585
31904	OX382154.1	2193933	-0.09375	0.00070	-0.10315	-0.01248	-0.06876	0.02592
31939	OX382154.1	2218850	-0.00302	-0.00086	0.18038	-0.01184	0.23492	0.02696
31968	OX382154.1	2243663	-0.11111	-0.00305	-0.12500	-0.01125	-0.14337	0.02825
31997	OX382154.1	2266241	-0.12676	-0.00518	-0.14490	-0.01044	-0.12821	0.02994
32180	OX382154.1	2423424	-0.09091	0.00948	-0.03623	0.02499	-0.02031	0.06880
32183	OX382154.1	2424229	0.05352	0.00968	0.00624	0.02524	0.04376	0.06902
32198	OX382154.1	2431492	-0.11628	0.01154	-0.13089	0.02748	0.08333	0.07091
32279	OX382154.1	2512265	-0.11628	0.03331	-0.13089	0.04871	0.08333	0.08676
32310	OX382154.1	2545083	0.02025	0.04113	0.23851	0.05439	0.23492	0.09025
32323	OX382154.1	2549201	-0.09375	0.04196	-0.10315	0.05488	-0.06876	0.09048
32355	OX382154.1	2585769	0.32623	0.04943	0.62115	0.05889	0.65707	0.09233
32374	OX382154.1	2595156	-0.06329	0.05115	-0.06126	0.05971	-0.06069	0.09270
32376	OX382154.1	2595734	0.32112	0.05125	0.29219	0.05975	0.33219	0.09270
32377	OX382154.1	2595737	0.13669	0.05125	0.03069	0.05975	0.00028	0.09271
32407	OX382154.1	2616467	-0.11111	0.05435	-0.12500	0.06063	-0.14337	0.09272
32412	OX382154.1	2625744	-0.09375	0.05567	-0.10315	0.06086	-0.06876	0.09271
32415	OX382154.1	2628770	-0.02949	0.05609	-0.00240	0.06091	-0.00455	0.09267
32446	OX382154.1	2649181	-0.06061	0.05878	-0.05769	0.06107	-0.05978	0.09233
32453	OX382154.1	2658432	0.32112	0.05973	0.29219	0.06083	0.33219	0.09194
32458	OX382154.1	2659470	0.02778	0.05983	0.02349	0.06080	0.02407	0.09189
32502	OX382154.1	2695644	-0.07280	0.06256	-0.07840	0.05868	-0.07866	0.08953
32503	OX382154.1	2696585	0.06977	0.06261	0.01478	0.05860	0.05323	0.08945
32525	OX382154.1	2719054	0.50515	0.06341	0.31210	0.05637	0.47619	0.08731
32538	OX382154.1	2737789	0.45243	0.06346	0.46791	0.05388	0.58333	0.08498
32572	OX382154.1	2757713	-0.00031	0.06338	-0.00912	0.05106	-0.01230	0.08272
32588	OX382154.1	2782571	-0.11628	0.06251	-0.13089	0.04736	-0.17998	0.07958
32647	OX382154.1	2843680	-0.09191	0.05876	-0.09496	0.03737	-0.06364	0.07139
32693	OX382154.1	2891805	-0.09222	0.05589	-0.04664	0.03198	0.13725	0.06766
32703	OX382154.1	2898342	0.01720	0.05556	0.13161	0.03155	0.26352	0.06751
32729	OX382154.1	2927487	0.11111	0.05457	0.02703	0.03085	0.03140	0.06822
32732	OX382154.1	2931456	-0.01010	0.05454	-0.05882	0.03090	-0.12304	0.06847
32748	OX382154.1	2939512	0.40269	0.05437	0.39250	0.03112	0.39117	0.06913
32778	OX382154.1	2953261	-0.08991	0.05435	-0.39018	0.03196	-0.27907	0.07081
32793	OX382154.1	2963037	-0.11111	0.05454	-0.12500	0.03297	-0.14337	0.07237
32799	OX382154.1	2966698	0.15152	0.05459	0.13158	0.03338	0.11728	0.07304
32833	OX382154.1	2997763	-0.09375	0.05563	-0.10315	0.03821	-0.06876	0.08040
32842	OX382154.1	3000683	0.09091	0.05588	0.01786	0.03893	0.05797	0.08138
32856	OX382154.1	3014435	0.19826	0.05663	0.16269	0.04213	0.16023	0.08584
32880	OX382154.1	3027654	-0.12676	0.05749	-0.14490	0.04567	-0.19380	0.09068
32943	OX382154.1	3074182	-0.03468	0.06130	0.02373	0.06106	0.19863	0.11115
33123	OX382154.1	3176748	0.01642	0.06818	0.01604	0.09726	0.01476	0.15434
33146	OX382154.1	3189722	0.32221	0.06804	0.41712	0.09976	0.54250	0.15671
33164	OX382154.1	3200829	0.26335	0.06798	0.04752	0.10159	0.46585	0.15823
33193	OX382154.1	3226977	0.02358	0.06714	0.06147	0.10377	0.09379	0.15881
33203	OX382154.1	3230776	0.18185	0.06692	100000	0.10381	100000	0.15851
33342	OX382154.1	3327452	0.08046	0.05859	0.02141	0.08779	-0.05848	0.12773
33356	OX382154.1	3334447	-0.09375	0.05803	-0.10315	0.08590	-0.06876	0.12453
33372	OX382154.1	3341652	-0.09375	0.05749	-0.10315	0.08395	-0.06876	0.12123
33438	OX382154.1	3380030	0.10923	0.05563	0.02003	0.07417	0.01786	0.10441
33442	OX382154.1	3381865	-0.03030	0.05564	-0.03125	0.07386	-0.00156	0.10386
33617	OX382154.1	3505177	0.06977	0.06032	0.01478	0.05995	0.05323	0.07464
33659	OX382154.1	3528143	0.07045	0.06204	0.06471	0.05999	0.08012	0.07295
33714	OX382154.1	3558159	0.23575	0.06396	0.22452	0.06056	0.22637	0.07200
33715	OX382154.1	3558374	0.01818	0.06398	0.08333	0.06057	0.07143	0.07200
33730	OX382154.1	3567937	0.13227	0.06453	0.18611	0.06082	0.18750	0.07186
33768	OX382154.1	3589052	0.09091	0.06560	0.01786	0.06143	0.00325	0.07172
33795	OX382154.1	3606109	-0.09375	0.06630	-0.10315	0.06190	-0.06876	0.07170
33922	OX382155.1	91655	-0.11111	-0.01815	-0.12500	-0.02229	-0.17857	-0.03213
33928	OX382155.1	111438	0.17768	-0.02214	0.17768	-0.02623	0.17816	-0.03476
34055	OX382155.1	263291	-0.10092	-0.04770	-0.11214	-0.05141	-0.15643	-0.05125
34091	OX382155.1	280132	-0.09375	-0.04944	-0.10315	-0.05331	-0.06876	-0.05230
34115	OX382155.1	292863	-0.11111	-0.05052	-0.12500	-0.05453	-0.14337	-0.05298
34116	OX382155.1	293874	0.09091	-0.05059	0.01786	-0.05462	0.05797	-0.05303
34132	OX382155.1	305843	-0.04869	-0.05134	0.09571	-0.05552	0.09302	-0.05342
34159	OX382155.1	328837	-0.11111	-0.05246	-0.16471	-0.05701	-0.22222	-0.05404
34248	OX382155.1	386240	-0.09375	-0.05290	-0.10315	-0.05876	-0.06876	-0.05407
34249	OX382155.1	386252	-0.09375	-0.05290	-0.10315	-0.05876	-0.06876	-0.05407
34485	OX382155.1	511347	-0.05263	-0.04732	-0.03687	-0.05662	-0.03125	-0.05023
34517	OX382155.1	540894	-0.09191	-0.04636	-0.09496	-0.05618	-0.06364	-0.04960
34537	OX382155.1	554749	0.09091	-0.04607	0.01786	-0.05605	0.00325	-0.04934
34615	OX382155.1	598478	0.12187	-0.04633	0.13070	-0.05656	0.06807	-0.04954
34638	OX382155.1	610667	-0.09375	-0.04658	-0.10315	-0.05680	-0.06876	-0.04969
34698	OX382155.1	634033	-0.11111	-0.04731	-0.12500	-0.05745	-0.14337	-0.05014
34785	OX382155.1	715603	-0.09375	-0.05178	-0.10315	-0.06120	-0.06876	-0.05335
34821	OX382155.1	727372	-0.09375	-0.05268	-0.10315	-0.06198	-0.06876	-0.05413
34830	OX382155.1	731757	-0.07280	-0.05295	-0.07840	-0.06220	-0.07866	-0.05441
34858	OX382155.1	746158	0.03309	-0.05429	0.03522	-0.06333	0.03574	-0.05557
34863	OX382155.1	746466	-0.09091	-0.05432	-0.10000	-0.06335	-0.07789	-0.05559
35173	OX382155.1	943127	-0.11111	-0.07237	-0.12500	-0.08158	-0.17857	-0.07834
35210	OX382155.1	1115130	-0.09091	-0.06325	-0.10000	-0.07303	-0.07789	-0.06082
35310	OX382155.1	1170456	-0.11628	-0.05534	-0.13089	-0.06517	-0.11429	-0.05013
35328	OX382155.1	1187880	-0.11628	-0.05219	-0.13089	-0.06203	-0.11429	-0.04625
35334	OX382155.1	1190322	-0.09375	-0.05184	-0.10315	-0.06168	-0.06876	-0.04580
35411	OX382155.1	1245259	0.17768	-0.04371	0.17768	-0.05390	0.17816	-0.03539
35509	OX382155.1	1353045	-0.11111	-0.02160	-0.12500	-0.03643	-0.14337	-0.00844
35656	OX382155.1	1452259	-0.07106	0.01693	-0.06248	-0.01053	0.08333	0.03122
35753	OX382155.1	1522689	-0.07106	0.04740	-0.06248	0.00919	-0.12500	0.05769
35818	OX382155.1	1596238	0.24153	0.06929	0.05988	0.02224	0.25000	0.07245
35875	OX382155.1	1629595	0.23575	0.07515	0.22452	0.02491	0.22637	0.07452
35964	OX382155.1	1714887	-0.11628	0.08191	-0.13089	0.02430	-0.11429	0.07021
36001	OX382155.1	1779252	-0.09375	0.08557	-0.10315	0.02238	-0.06876	0.06460
36035	OX382155.1	1871797	0.39306	0.08956	0.19061	0.02105	0.25000	0.05736
36080	OX382155.1	2019652	-0.07811	0.06155	-0.06198	0.00792	-0.06254	0.03154
36346	OX382155.1	2948617	-0.07892	-0.08506	-0.08578	-0.09306	-0.13043	-0.10352
36358	OX382155.1	2992000	-0.09091	-0.08531	-0.10000	-0.09336	-0.07789	-0.10242
36682	OX382156.1	129023	0.61756	0.09350	0.63465	0.07137	0.63453	0.08263
36748	OX382156.1	161685	-0.00102	0.08780	-0.00240	0.06300	-0.00455	0.07511
36799	OX382156.1	188611	0.15916	0.08444	0.03327	0.05713	0.08333	0.07015
36818	OX382156.1	199331	-0.02593	0.08332	-0.00470	0.05486	0.04155	0.06831
36819	OX382156.1	199334	-0.04337	0.08332	0.03252	0.05486	0.02838	0.06831
36870	OX382156.1	226857	-0.08387	0.08183	-0.09150	0.05030	-0.09160	0.06500
36910	OX382156.1	247583	0.10923	0.08177	0.02003	0.04768	0.01786	0.06349
36930	OX382156.1	262942	0.10923	0.08235	0.02003	0.04622	0.01786	0.06293
36943	OX382156.1	267307	-0.06910	0.08261	-0.06136	0.04587	-0.06364	0.06287
36971	OX382156.1	288997	-0.07106	0.08455	-0.06248	0.04468	-0.12500	0.06312
36993	OX382156.1	298601	0.01642	0.08575	0.01604	0.04442	0.01476	0.06355
37102	OX382156.1	364025	0.24153	0.09794	0.05988	0.04654	0.25000	0.07067
37224	OX382156.1	469771	0.36508	0.11704	0.18699	0.05806	0.19863	0.08727
37263	OX382156.1	492193	0.23575	0.11744	0.22452	0.05974	0.22637	0.08895
37282	OX382156.1	513773	0.53527	0.11621	0.31540	0.06109	0.47619	0.08997
37283	OX382156.1	513776	-0.06329	0.11621	-0.06126	0.06109	-0.06069	0.08997
37297	OX382156.1	517157	-0.06329	0.11588	-0.06126	0.06126	-0.06069	0.09005
37332	OX382156.1	540089	0.15916	0.11248	0.03327	0.06227	0.08333	0.09014
37500	OX382156.1	638789	0.10923	0.07922	0.02003	0.06458	0.01786	0.08534
37501	OX382156.1	638792	-0.10092	0.07922	-0.11214	0.06458	-0.07843	0.08534
37559	OX382156.1	690950	0.07763	0.05555	0.06126	0.06561	0.06350	0.08324
37627	OX382156.1	756800	-0.07811	0.02672	0.03252	0.06324	0.02838	0.07999
37717	OX382156.1	828666	0.11111	0.00080	0.80000	0.05008	0.65037	0.07069
37742	OX382156.1	847357	0.14141	-0.00493	0.14286	0.04463	0.20201	0.06700
37743	OX382156.1	847360	0.00587	-0.00493	0.02430	0.04462	0.02407	0.06699
37789	OX382156.1	881100	-0.11111	-0.01470	-0.12500	0.03262	0.02174	0.05845
37793	OX382156.1	881860	0.02946	-0.01491	0.00378	0.03233	-0.05598	0.05823
37833	OX382156.1	905824	-0.09091	-0.02117	-0.10000	0.02292	-0.07789	0.05124
37858	OX382156.1	923363	-0.09375	-0.02601	-0.10315	0.01541	-0.06876	0.04544
37895	OX382156.1	948174	0.04642	-0.03223	0.05020	0.00463	0.17884	0.03671
38008	OX382156.1	1047022	-0.09191	-0.04890	-0.09496	-0.02897	-0.06364	0.00476
38042	OX382156.1	1074381	-0.09375	-0.04989	-0.10315	-0.03313	-0.06876	-0.00113
38081	OX382156.1	1099967	-0.10891	-0.04972	-0.12112	-0.03482	0.09206	-0.00507
38122	OX382156.1	1114403	-0.11628	-0.04895	-0.13089	-0.03485	-0.08686	-0.00660
38166	OX382156.1	1149066	-0.06815	-0.04557	-0.06136	-0.03266	-0.06364	-0.00836
38188	OX382156.1	1174611	-0.07892	-0.04172	-0.08578	-0.02932	-0.13043	-0.00804
38266	OX382156.1	1223000	-0.11111	-0.03233	-0.12500	-0.02084	-0.14337	-0.00483
38276	OX382156.1	1230225	-0.11111	-0.03076	-0.12500	-0.01943	-0.14337	-0.00413
38304	OX382156.1	1245252	0.12802	-0.02726	0.33391	-0.01644	0.37130	-0.00252
38333	OX382156.1	1274861	-0.11111	-0.02002	-0.11429	-0.01060	-0.16667	0.00097
38334	OX382156.1	1275630	-0.06201	-0.01983	-0.05419	-0.01045	-0.01230	0.00107
38353	OX382156.1	1298368	-0.11628	-0.01423	-0.13089	-0.00663	-0.11429	0.00352
38355	OX382156.1	1302700	0.14484	-0.01309	0.17382	-0.00580	0.17598	0.00412
38366	OX382156.1	1304833	-0.09375	-0.01253	-0.10315	-0.00539	-0.06876	0.00442
38397	OX382156.1	1345691	0.27012	-0.00145	0.25778	0.00182	0.21552	0.01003
38447	OX382156.1	1395612	-0.07280	0.01282	-0.04244	0.00906	-0.08663	0.01666
38497	OX382156.1	1421669	-0.03120	0.02080	-0.03413	0.01248	-0.00455	0.02017
38615	OX382156.1	1498414	-0.03030	0.04449	-0.03125	0.02031	-0.00156	0.02926
38638	OX382156.1	1509052	0.02949	0.04782	0.02430	0.02132	0.02407	0.03045
38657	OX382156.1	1520898	0.10923	0.05153	0.02003	0.02246	0.01786	0.03175
38662	OX382156.1	1522163	0.28765	0.05193	0.13161	0.02259	0.22000	0.03189
38879	OX382156.1	1692959	0.13669	0.08166	0.03069	0.03661	0.04027	0.04166
38903	OX382156.1	1707339	0.13669	0.08035	0.03069	0.03645	0.00672	0.04085
39074	OX382156.1	1837528	0.11888	0.05372	0.08333	0.02523	0.07143	0.02648
39114	OX382156.1	1863215	0.36185	0.04842	0.38218	0.02163	0.39009	0.02269
39153	OX382156.1	1876032	-0.06329	0.04644	-0.06126	0.02031	-0.06069	0.02125
39154	OX382156.1	1877108	-0.06329	0.04625	-0.06126	0.02016	-0.06069	0.02110
39194	OX382156.1	1900630	-0.03120	0.04253	-0.03413	0.01725	-0.00455	0.01807
39286	OX382156.1	1974713	0.13669	0.03611	0.03069	0.01104	0.00672	0.01147
39294	OX382156.1	1982016	-0.09091	0.03607	-0.07843	0.01087	-0.05848	0.01128
39309	OX382156.1	1987523	-0.09091	0.03611	-0.10000	0.01080	-0.07789	0.01120
39341	OX382156.1	2020399	0.09091	0.03771	0.01786	0.01160	0.00325	0.01190
39342	OX382156.1	2020402	0.02946	0.03771	0.00378	0.01160	-0.05598	0.01190
39380	OX382156.1	2055416	-0.06329	0.04212	-0.06126	0.01556	-0.06069	0.01584
39445	OX382156.1	2106038	0.10923	0.05305	0.02003	0.02554	0.01786	0.02560
39522	OX382156.1	2151072	0.10791	0.06594	0.11226	0.03841	0.14754	0.03817
39548	OX382156.1	2171387	-0.09191	0.07186	-0.09496	0.04462	-0.06364	0.04425
39589	OX382156.1	2194813	-0.01299	0.07853	-0.00833	0.05184	-0.01549	0.05131
39704	OX382156.1	2238053	-0.11111	0.08853	-0.12500	0.06402	-0.14337	0.06329
39750	OX382156.1	2263998	0.49029	0.09230	0.41161	0.06990	0.38924	0.06918
39848	OX382156.1	2318391	0.40269	0.09430	0.39250	0.07804	0.39117	0.07775
39866	OX382156.1	2333896	0.17768	0.09374	0.17768	0.07963	0.17816	0.07957
39868	OX382156.1	2334399	0.10923	0.09370	0.02003	0.07967	0.01786	0.07962
39872	OX382156.1	2334921	-0.01181	0.09367	-0.03082	0.07970	-0.03215	0.07966
39908	OX382156.1	2352668	0.10923	0.09209	0.02003	0.08077	0.01786	0.08102
39955	OX382156.1	2376780	0.02253	0.08863	-0.08650	0.08105	-0.13750	0.08183
40121	OX382156.1	2481808	0.03309	0.06671	0.03522	0.07365	0.03574	0.07660
40124	OX382156.1	2482380	-0.11111	0.06658	-0.12500	0.07357	-0.14337	0.07653
40126	OX382156.1	2482435	0.15455	0.06657	0.24510	0.07357	0.24737	0.07652
40131	OX382156.1	2483525	-0.02963	0.06632	-0.07411	0.07342	0.03846	0.07639
40142	OX382156.1	2491139	0.16143	0.06457	0.52876	0.07235	0.53571	0.07543
40161	OX382156.1	2507698	0.11439	0.06102	0.01996	0.07003	0.01707	0.07328
40162	OX382156.1	2507701	0.05390	0.06102	0.04017	0.07003	0.04188	0.07328
40190	OX382156.1	2521538	-0.06329	0.05781	-0.06126	0.06758	-0.06069	0.07093
40241	OX382156.1	2557328	0.08591	0.04965	0.17836	0.06027	0.17816	0.06364
40297	OX382156.1	2596316	0.07763	0.04103	0.06126	0.05058	0.06350	0.05360
40326	OX382156.1	2617245	-0.07811	0.03633	-0.06198	0.04465	-0.06254	0.04731
40465	OX382156.1	2693856	-0.02730	0.01877	-0.03076	0.02080	-0.03373	0.02193
40499	OX382156.1	2719897	0.16342	0.01268	0.08758	0.01294	0.08333	0.01353
40568	OX382156.1	2757038	0.10923	0.00520	0.02003	0.00368	0.01786	0.00370
40658	OX382156.1	2805108	-0.09091	-0.00257	-0.10000	-0.00512	-0.07789	-0.00532
40666	OX382156.1	2812453	0.01642	-0.00341	0.01604	-0.00606	0.01476	-0.00624
40732	OX382156.1	2845154	-0.11111	-0.00632	-0.12500	-0.00949	-0.17857	-0.00940
40766	OX382156.1	2873158	-0.06329	-0.00722	-0.06126	-0.01142	-0.06069	-0.01152
40775	OX382156.1	2878229	-0.06329	-0.00730	-0.06126	-0.01169	-0.06069	-0.01176
40807	OX382156.1	2899891	-0.05683	-0.00732	-0.00912	-0.01270	-0.01230	-0.01260
40830	OX382156.1	2909702	-0.06329	-0.00709	-0.06126	-0.01305	-0.06069	-0.01289
40832	OX382156.1	2909888	0.01235	-0.00708	0.14286	-0.01305	0.15430	-0.01289
40857	OX382156.1	2922532	-0.06329	-0.00648	-0.06126	-0.01341	-0.06069	-0.01319
40909	OX382156.1	2954531	0.23575	-0.00433	0.22452	-0.01448	0.22637	-0.01428
40937	OX382156.1	2969332	-0.06329	-0.00283	-0.06126	-0.01475	-0.06069	-0.01459
40951	OX382156.1	2979702	-0.06329	-0.00159	-0.06126	-0.01488	-0.06069	-0.01482
40981	OX382156.1	3001602	0.04382	0.00151	0.01008	-0.01513	-0.01549	-0.01545
41075	OX382156.1	3067438	-0.09191	0.01213	-0.09496	-0.01635	-0.06364	-0.01931
41129	OX382156.1	3098787	-0.07280	0.01746	-0.07840	-0.01692	-0.07866	-0.02189
41164	OX382156.1	3120783	0.21311	0.02109	0.05677	-0.01729	0.19863	-0.02385
41180	OX382156.1	3128057	0.10923	0.02225	0.02003	-0.01739	0.01786	-0.02452
41189	OX382156.1	3129951	-0.09375	0.02255	-0.10315	-0.01742	-0.06876	-0.02469
41215	OX382156.1	3144188	0.09419	0.02479	0.08731	-0.01760	0.04188	-0.02597
41245	OX382156.1	3158727	0.02778	0.02694	0.02349	-0.01776	0.02407	-0.02726
41304	OX382156.1	3193773	-0.10092	0.03171	-0.11214	-0.01800	-0.15643	-0.03013
41360	OX382156.1	3227451	-0.12676	0.03585	-0.14490	-0.01794	-0.19380	-0.03230
41361	OX382156.1	3227726	0.10923	0.03588	0.02003	-0.01794	0.01786	-0.03231
41376	OX382156.1	3235638	0.01642	0.03680	0.01604	-0.01789	0.01476	-0.03271
41395	OX382156.1	3246808	-0.06061	0.03807	-0.26923	-0.01779	-0.20732	-0.03322
41396	OX382156.1	3247804	0.30112	0.03818	0.35379	-0.01778	0.35378	-0.03326
41440	OX382156.1	3269403	-0.06329	0.04059	-0.17863	-0.01749	-0.17807	-0.03398
41443	OX382156.1	3270094	0.06977	0.04066	0.00990	-0.01748	-0.03739	-0.03399
41462	OX382156.1	3286401	-0.02593	0.04236	-0.04316	-0.01720	0.02626	-0.03430
41472	OX382156.1	3295304	0.23562	0.04333	0.00000	-0.01698	-0.57143	-0.03433
41475	OX382156.1	3299690	-0.12676	0.04377	-0.14490	-0.01689	-0.19380	-0.03436
41483	OX382156.1	3303352	0.09091	0.04414	0.01786	-0.01681	0.00325	-0.03437
41504	OX382156.1	3314341	0.10923	0.04524	0.02003	-0.01655	0.01786	-0.03434
41513	OX382156.1	3316744	0.13669	0.04548	0.03069	-0.01649	0.00028	-0.03433
41542	OX382156.1	3339547	-0.06201	0.04787	-0.05419	-0.01580	-0.01230	-0.03392
41554	OX382156.1	3348817	-0.07811	0.04878	-0.06198	-0.01551	-0.06254	-0.03366
41580	OX382156.1	3362220	0.10923	0.05027	0.02003	-0.01510	0.01786	-0.03325
41627	OX382156.1	3404763	0.15916	0.05452	0.03327	-0.01349	0.08333	-0.03104
41638	OX382156.1	3411380	-0.09091	0.05524	-0.10000	-0.01317	-0.07789	-0.03054
41691	OX382156.1	3437167	0.29707	0.05827	0.12348	-0.01174	0.12000	-0.02834
41813	OX382157.1	63570	-0.09400	0.02135	-0.06643	0.00335	-0.10560	-0.01551
41840	OX382157.1	76392	0.07792	0.02269	0.03883	0.00444	0.00860	-0.01388
41849	OX382157.1	84309	-0.11111	0.02349	-0.11429	0.00509	-0.16667	-0.01288
41944	OX382157.1	143062	-0.07280	0.02863	-0.07840	0.00947	-0.07866	-0.00599
42000	OX382157.1	169738	0.10923	0.03044	0.02003	0.01113	0.01786	-0.00324
42001	OX382157.1	169741	-0.11863	0.03044	-0.06749	0.01113	-0.16450	-0.00324
42015	OX382157.1	175162	-0.06329	0.03076	-0.06126	0.01144	-0.06069	-0.00271
42046	OX382157.1	192085	0.17159	0.03160	0.28540	0.01218	0.22470	-0.00120
42079	OX382157.1	211620	0.08803	0.03238	0.01133	0.01302	0.00901	0.00044
42088	OX382157.1	213977	-0.00478	0.03246	-0.03125	0.01311	-0.01820	0.00063
42089	OX382157.1	213980	0.36508	0.03246	0.18699	0.01311	0.15411	0.00063
42102	OX382157.1	223708	0.19826	0.03275	0.16269	0.01344	0.16023	0.00137
42107	OX382157.1	224956	-0.06329	0.03278	-0.06126	0.01348	-0.06069	0.00146
42176	OX382157.1	265339	0.00485	0.03322	-0.06136	0.01431	-0.06364	0.00396
42200	OX382157.1	282072	-0.09375	0.03303	-0.10315	0.01434	-0.06876	0.00470
42209	OX382157.1	290115	-0.01851	0.03287	-0.00240	0.01428	-0.00455	0.00499
42260	OX382157.1	324649	0.03309	0.03153	0.03522	0.01338	0.03574	0.00563
42276	OX382157.1	333899	-0.11111	0.03099	-0.12500	0.01295	-0.14337	0.00562
42301	OX382157.1	357393	0.26364	0.02915	0.29902	0.01126	0.27155	0.00513
42497	OX382157.1	460678	-0.09091	0.01527	-0.10000	-0.00549	-0.07789	-0.00477
42581	OX382157.1	511186	-0.06329	0.00590	-0.06126	-0.02012	-0.06069	-0.01437
42738	OX382157.1	581743	0.02778	-0.00675	0.02349	-0.04164	0.02407	-0.02801
42772	OX382157.1	607044	0.06977	-0.01078	0.01478	-0.04812	-0.02031	-0.03172
42817	OX382157.1	640351	-0.04707	-0.01561	-0.26686	-0.05498	-0.14783	-0.03526
43058	OX382157.1	789473	-0.09375	-0.02339	-0.10315	-0.06031	-0.06876	-0.03448
43087	OX382157.1	807416	-0.01299	-0.02268	-0.00833	-0.05933	0.03140	-0.03358
43134	OX382157.1	847941	-0.05263	-0.01926	-0.03687	-0.05486	-0.07817	-0.02987
43170	OX382157.1	875624	-0.06329	-0.01580	-0.06126	-0.05132	-0.06069	-0.02707
43212	OX382157.1	897526	0.08347	-0.01275	0.10298	-0.04804	0.12592	-0.02457
43225	OX382157.1	903713	-0.03120	-0.01182	-0.03413	-0.04704	-0.00455	-0.02381
43249	OX382157.1	920035	-0.08991	-0.00919	-0.39018	-0.04416	-0.33663	-0.02143
43295	OX382157.1	941734	-0.10891	-0.00492	-0.12112	-0.03938	0.09206	-0.01760
43326	OX382157.1	964220	-0.07280	-0.00036	-0.07840	-0.03410	-0.07866	-0.01330
43335	OX382157.1	969314	0.04453	0.00073	0.00359	-0.03280	0.00325	-0.01223
43416	OX382157.1	1018085	0.13669	0.01272	0.03069	-0.01805	0.00028	0.00048
43482	OX382157.1	1052368	-0.09091	0.02244	-0.07843	-0.00541	-0.05848	0.01198
43486	OX382157.1	1053034	0.07763	0.02264	0.06126	-0.00514	0.06350	0.01222
43523	OX382157.1	1066582	-0.09091	0.02676	-0.10000	0.00036	-0.07789	0.01741
43528	OX382157.1	1068622	0.10923	0.02740	0.02003	0.00121	0.01786	0.01822
43537	OX382157.1	1070551	-0.02268	0.02800	-0.02733	0.00202	-0.02945	0.01899
43633	OX382157.1	1117390	0.10923	0.04343	0.02003	0.02283	0.01786	0.03941
43750	OX382157.1	1199080	-0.09091	0.07071	-0.10000	0.05871	-0.07789	0.07769
43753	OX382157.1	1199237	-0.02564	0.07076	-0.02857	0.05877	-0.08333	0.07776
43794	OX382157.1	1217124	-0.02040	0.07625	-0.02249	0.06558	-0.02143	0.08552
43821	OX382157.1	1237931	0.53188	0.08224	0.55302	0.07274	0.60376	0.09390
43832	OX382157.1	1244866	0.13636	0.08423	0.08333	0.07503	0.10176	0.09661
43870	OX382157.1	1279521	-0.04869	0.09242	-0.10534	0.08398	-0.08713	0.10781
43871	OX382157.1	1281223	0.12585	0.09279	0.71844	0.08436	0.72814	0.10830
43898	OX382157.1	1304583	-0.07332	0.09756	-0.28808	0.08894	-0.19639	0.11447
43926	OX382157.1	1322120	0.49029	0.10058	0.41161	0.09153	0.38924	0.11818
43951	OX382157.1	1340419	0.02152	0.10322	0.01281	0.09359	0.01064	0.12120
43986	OX382157.1	1362956	-0.05024	0.10588	-0.03426	0.09513	0.24737	0.12396
43996	OX382157.1	1370070	0.36185	0.10665	0.38218	0.09570	0.39009	0.12488
44000	OX382157.1	1372528	0.11111	0.10670	0.02703	0.09545	-0.03215	0.12486
44005	OX382157.1	1376865	0.06977	0.10701	0.01478	0.09548	0.05323	0.12510
44030	OX382157.1	1390381	-0.09790	0.10776	-0.07616	0.09530	-0.04598	0.12556
44085	OX382157.1	1438401	-0.00069	0.10755	-0.19505	0.09122	-0.10669	0.12325
44090	OX382157.1	1442356	0.36185	0.10725	0.38218	0.09059	0.39009	0.12272
44441	OX382157.1	1695554	-0.09375	0.03658	-0.10315	0.00902	-0.06876	0.03225
44443	OX382157.1	1698337	-0.09375	0.03660	-0.10315	0.00903	-0.06876	0.03221
44546	OX382157.1	1772199	-0.06815	0.04308	-0.06136	0.01561	-0.06364	0.03866
44548	OX382157.1	1774375	0.11372	0.04339	0.33966	0.01597	0.19469	0.03903
44568	OX382157.1	1788092	0.13669	0.04538	0.03069	0.01828	0.00028	0.04142
44632	OX382157.1	1821298	-0.10785	0.04995	-0.36833	0.02395	-0.16531	0.04712
44670	OX382157.1	1853814	0.01642	0.05426	0.01604	0.02990	0.01476	0.05311
44677	OX382157.1	1854636	0.24153	0.05436	0.05988	0.03005	0.25000	0.05325
44691	OX382157.1	1863297	0.01642	0.05538	0.01604	0.03158	0.01476	0.05475
44709	OX382157.1	1874290	0.18089	0.05659	0.05232	0.03347	0.02838	0.05658
44751	OX382157.1	1897930	0.23575	0.05860	0.22452	0.03727	0.22637	0.06002
44801	OX382157.1	1931132	-0.09091	0.06108	-0.10000	0.04212	-0.07789	0.06425
44890	OX382157.1	1975238	-0.01662	0.06329	0.15515	0.04724	0.20201	0.06815
44914	OX382157.1	1994605	0.15916	0.06377	0.03327	0.04876	0.08333	0.06899
44919	OX382157.1	1995480	0.43775	0.06379	0.57612	0.04882	0.59992	0.06901
44926	OX382157.1	1997357	-0.07134	0.06382	-0.12623	0.04895	-0.08745	0.06906
44927	OX382157.1	1997360	-0.11111	0.06382	-0.12500	0.04895	-0.17857	0.06906
44975	OX382157.1	2026764	-0.02564	0.06389	0.00690	0.05014	-0.01801	0.06898
45051	OX382157.1	2084722	0.00587	0.06304	0.02430	0.04918	0.02407	0.06498
45149	OX382157.1	2143027	0.09091	0.06063	0.01786	0.04422	0.05797	0.05658
45272	OX382157.1	2214152	0.10923	0.05644	0.02003	0.03615	0.01786	0.04513
45375	OX382157.1	2291592	-0.09375	0.05002	-0.10315	0.02886	-0.06876	0.03582
45381	OX382157.1	2292724	0.13669	0.04990	0.03069	0.02875	0.00028	0.03571
45436	OX382157.1	2325955	-0.06667	0.04614	-0.05882	0.02566	-0.12304	0.03251
45446	OX382157.1	2329000	0.03743	0.04580	0.16667	0.02538	0.18750	0.03225
45466	OX382157.1	2343838	0.11111	0.04408	0.02703	0.02411	0.03140	0.03108
45534	OX382157.1	2384790	0.28242	0.03917	0.22967	0.02029	0.29705	0.02782
45579	OX382157.1	2459026	-0.04144	0.03101	-0.02389	0.01341	-0.02251	0.02229
45580	OX382157.1	2461882	0.00254	0.03078	-0.00912	0.01321	-0.01230	0.02213
45609	OX382157.1	2478375	0.13669	0.02963	0.03069	0.01211	0.00028	0.02132
45673	OX382157.1	2523535	-0.08387	0.02783	-0.09150	0.00999	-0.09160	0.01959
45708	OX382157.1	2549047	-0.06329	0.02766	-0.06126	0.00933	-0.06069	0.01894
45720	OX382157.1	2552676	0.00000	0.02769	0.00000	0.00929	0.02721	0.01888
45758	OX382157.1	2573767	-0.03275	0.02812	0.03084	0.00918	0.02626	0.01862
45814	OX382157.1	2605919	-0.11111	0.02963	-0.12500	0.00975	0.02174	0.01864
45866	OX382157.1	2640809	0.04642	0.03184	0.05020	0.01076	0.17884	0.01879
45871	OX382157.1	2642181	0.13669	0.03195	0.03069	0.01081	0.00028	0.01880
45905	OX382157.1	2665999	0.29515	0.03382	0.30876	0.01191	0.26230	0.01901
45925	OX382157.1	2674392	0.10923	0.03453	0.02003	0.01232	0.01786	0.01909
45966	OX382157.1	2691639	-0.07280	0.03596	-0.07840	0.01319	-0.07866	0.01919
45977	OX382157.1	2701492	0.11111	0.03682	0.02703	0.01372	-0.01316	0.01926
45989	OX382157.1	2706138	-0.06329	0.03750	-0.06126	0.01441	-0.06069	0.01971
45991	OX382157.1	2709806	-0.06329	0.03784	-0.06126	0.01465	-0.06069	0.01976
46054	OX382157.1	2749730	0.10923	0.04201	0.02003	0.01801	0.01786	0.02089
46102	OX382157.1	2779328	0.19217	0.04524	0.20351	0.02087	0.20310	0.02183
46117	OX382157.1	2784743	-0.07811	0.04584	-0.06198	0.02149	-0.06254	0.02206
46118	OX382157.1	2784746	0.01335	0.04584	0.00113	0.02149	0.00000	0.02206
46188	OX382157.1	2827643	0.10380	0.05086	0.00670	0.02745	0.01920	0.02479
46389	OX382157.1	2964112	0.23055	0.06428	0.13299	0.05364	0.01510	0.04480
46424	OX382157.1	2991045	-0.07280	0.06547	-0.07840	0.05799	-0.07866	0.04975
46507	OX382157.1	3054132	-0.02084	0.06533	-0.06136	0.06342	-0.06364	0.05899
46508	OX382157.1	3054135	0.37778	0.06533	0.42400	0.06342	0.36613	0.05899
46511	OX382157.1	3054955	0.07763	0.06530	0.06126	0.06344	0.06350	0.05908
46531	OX382157.1	3079932	-0.01268	0.06408	-0.03559	0.06362	-0.00923	0.06144
46537	OX382157.1	3081013	-0.09091	0.06401	-0.10000	0.06360	-0.07789	0.06152
46560	OX382157.1	3093736	0.04642	0.06308	0.05020	0.06322	0.00510	0.06235
46577	OX382157.1	3101263	0.11111	0.06248	0.12903	0.06285	0.03460	0.06277
46631	OX382157.1	3138101	-0.11111	0.05874	-0.05517	0.05966	-0.07817	0.06367
46642	OX382157.1	3151877	0.23575	0.05718	0.38377	0.05807	0.38362	0.06369
46646	OX382157.1	3153158	0.19217	0.05703	0.20351	0.05790	0.20310	0.06367
46659	OX382157.1	3164280	0.25991	0.05575	0.25462	0.05646	0.25000	0.06353
46666	OX382157.1	3169961	-0.09091	0.05498	-0.10000	0.05558	-0.07789	0.06331
46724	OX382157.1	3198077	0.22912	0.05100	0.18478	0.05076	0.24737	0.06180
46803	OX382157.1	3256399	0.15152	0.04234	0.13158	0.03918	0.17394	0.05677
46818	OX382157.1	3263627	-0.02418	0.04131	-0.00296	0.03771	-0.03962	0.05602
46846	OX382157.1	3281709	-0.06329	0.03880	-0.06126	0.03407	-0.06069	0.05414
46877	OX382157.1	3294089	-0.09375	0.03722	-0.10315	0.03165	-0.06876	0.05283
46878	OX382157.1	3295321	-0.09091	0.03707	-0.10000	0.03141	-0.07789	0.05270
46909	OX382157.1	3305625	-0.11111	0.03584	-0.05517	0.02947	0.05600	0.05162
46938	OX382157.1	3315154	0.05556	0.03478	0.01370	0.02774	-0.04779	0.05064
46951	OX382157.1	3319921	-0.09375	0.03428	-0.10315	0.02690	-0.06876	0.05016
47002	OX382157.1	3350047	0.10586	0.03159	-0.00984	0.02209	0.23835	0.04730
47121	OX382157.1	3417593	-0.07248	0.02867	-0.04555	0.01483	-0.03215	0.04258
47125	OX382157.1	3418931	-0.03424	0.02866	0.00670	0.01474	0.01920	0.04251
47139	OX382157.1	3426384	0.27012	0.02864	0.25778	0.01427	0.21552	0.04216
47151	OX382157.1	3433266	0.09091	0.02867	0.01786	0.01390	0.00325	0.04186
47158	OX382157.1	3438836	-0.03120	0.02871	-0.03413	0.01363	-0.00455	0.04164
47181	OX382157.1	3449778	0.11509	0.02896	0.01463	0.01327	0.06677	0.04135
47264	OX382158.1	28331	0.21311	0.01235	0.05677	0.05424	0.10959	0.06961
47275	OX382158.1	30886	-0.06329	0.01225	-0.06126	0.05468	-0.06069	0.07001
47312	OX382158.1	54029	0.13669	0.01135	0.03069	0.05855	0.00028	0.07347
47352	OX382158.1	76333	-0.09039	0.01057	-0.08548	0.06200	0.06153	0.07649
47366	OX382158.1	81374	-0.09091	0.01037	-0.10000	0.06274	-0.07789	0.07714
47379	OX382158.1	91531	-0.06329	0.00996	-0.06126	0.06416	-0.06069	0.07838
47401	OX382158.1	103286	0.09091	0.00948	0.01786	0.06568	0.00325	0.07970
47408	OX382158.1	108182	0.03309	0.00934	0.03522	0.06650	0.03574	0.08044
47445	OX382158.1	130621	-0.11111	0.00840	-0.12500	0.06891	-0.14337	0.08250
47478	OX382158.1	144640	0.15916	0.00778	0.03327	0.07005	0.08333	0.08343
47495	OX382158.1	152315	-0.02232	0.00743	100000	0.07054	100000	0.08380
47563	OX382158.1	187835	0.09722	0.00638	0.04000	0.07143	-0.01820	0.08417
47577	OX382158.1	196899	-0.09091	0.00605	-0.10000	0.07121	-0.07789	0.08383
47594	OX382158.1	206959	0.01010	0.00571	0.23611	0.07074	0.24737	0.08324
47813	OX382158.1	373352	-0.09091	0.01404	-0.07843	0.04224	-0.05848	0.05133
47833	OX382158.1	385010	0.13669	0.01635	0.03069	0.04113	0.08333	0.04975
47863	OX382158.1	405796	-0.09191	0.02109	-0.09496	0.04024	-0.06364	0.04794
47893	OX382158.1	419174	-0.03030	0.02452	-0.03125	0.04044	-0.00156	0.04748
47948	OX382158.1	457691	0.01642	0.03556	0.01604	0.04391	0.01476	0.04893
47956	OX382158.1	461476	-0.11111	0.03672	-0.12500	0.04447	-0.17857	0.04929
48049	OX382158.1	518577	0.13669	0.05528	0.03069	0.05689	0.00028	0.05857
48092	OX382158.1	554073	0.07646	0.06621	0.32561	0.06562	0.34802	0.06545
48171	OX382158.1	611186	0.09091	0.08075	0.01786	0.07724	0.00325	0.07461
48187	OX382158.1	621071	0.20635	0.08272	0.20800	0.07914	0.15385	0.07618
48200	OX382158.1	628812	0.02778	0.08414	0.02349	0.08051	0.02407	0.07733
48201	OX382158.1	628815	0.39306	0.08414	0.19061	0.08051	0.25000	0.07733
48214	OX382158.1	634331	-0.04869	0.08539	0.09571	0.08154	0.09302	0.07827
48338	OX382158.1	738228	0.06977	0.09463	0.01478	0.09148	-0.02031	0.08863
48360	OX382158.1	765612	0.20635	0.09541	0.20800	0.09321	0.13776	0.09159
48385	OX382158.1	784636	0.03309	0.09567	0.03522	0.09423	0.03574	0.09375
48522	OX382158.1	889815	-0.09191	0.10137	-0.09496	0.10346	-0.06364	0.11109
48553	OX382158.1	902941	0.06145	0.10283	0.01079	0.10497	0.01266	0.11360
48614	OX382158.1	943437	-0.02593	0.10881	-0.00230	0.11029	0.00418	0.12174
48628	OX382158.1	955976	0.33745	0.11100	0.46335	0.11202	0.52883	0.12421
48636	OX382158.1	963354	0.44906	0.11214	0.54486	0.11282	0.54250	0.12542
48643	OX382158.1	973908	-0.09191	0.11412	-0.09496	0.11435	-0.06364	0.12752
48674	OX382158.1	1000232	-0.09375	0.11952	-0.10315	0.11802	-0.06876	0.13234
48682	OX382158.1	1005594	0.12187	0.12073	0.13070	0.11856	0.08333	0.13308
48781	OX382158.1	1083705	0.39306	0.13820	0.19061	0.12927	0.25000	0.14553
48859	OX382158.1	1174001	-0.09375	0.14855	-0.10315	0.13155	-0.06876	0.14874
48916	OX382158.1	1212340	0.36185	0.14428	0.38218	0.12558	0.39009	0.14333
48934	OX382158.1	1215508	0.29515	0.14361	0.30876	0.12482	0.26230	0.14265
49090	OX382158.1	1338718	0.13669	0.08986	0.03069	0.07754	0.08333	0.10113
49154	OX382158.1	1394752	0.12727	0.06699	0.13725	0.06097	0.15322	0.08669
49175	OX382158.1	1406396	-0.12676	0.06327	-0.14490	0.05851	-0.12821	0.08445
49223	OX382158.1	1489313	-0.05263	0.05163	-0.03687	0.05587	-0.03125	0.08163
49267	OX382158.1	1549155	-0.10891	0.05222	-0.12112	0.06153	0.09206	0.08579
49277	OX382158.1	1557538	0.19826	0.05272	0.16269	0.06257	0.16023	0.08658
49291	OX382158.1	1565110	-0.09091	0.05323	-0.10000	0.06352	-0.07789	0.08731
49313	OX382158.1	1576916	0.10024	0.05412	0.10576	0.06504	0.16935	0.08845
49324	OX382158.1	1583471	0.13196	0.05466	0.01463	0.06590	-0.00923	0.08910
49325	OX382158.1	1583474	-0.09375	0.05466	-0.10315	0.06590	-0.06876	0.08910
49338	OX382158.1	1590038	-0.04575	0.05523	-0.04211	0.06675	0.08012	0.08974
49366	OX382158.1	1612614	0.09750	0.05741	0.41035	0.06968	0.40909	0.09193
49368	OX382158.1	1612858	0.24528	0.05743	0.11504	0.06971	0.07543	0.09195
49375	OX382158.1	1617917	-0.09375	0.05796	-0.10315	0.07036	-0.06876	0.09243
49379	OX382158.1	1621393	0.18605	0.05834	0.07674	0.07080	0.05323	0.09275
49399	OX382158.1	1631813	-0.11111	0.05958	-0.12500	0.07218	-0.17857	0.09378
49427	OX382158.1	1646494	0.40053	0.06130	0.42520	0.07392	0.36538	0.09504
49465	OX382158.1	1686384	-0.07106	0.06641	-0.06248	0.07791	-0.04211	0.09774
49467	OX382158.1	1686526	0.27400	0.06643	0.39088	0.07792	0.39009	0.09775
49468	OX382158.1	1686850	-0.01741	0.06648	0.18038	0.07795	0.23492	0.09777
49477	OX382158.1	1696127	-0.09375	0.06784	-0.10315	0.07882	-0.06876	0.09834
49541	OX382158.1	1733117	0.16667	0.07351	0.45217	0.08158	0.49291	0.09998
49587	OX382158.1	1786931	-0.06201	0.08190	-0.29118	0.08312	-0.21126	0.10004
49597	OX382158.1	1790931	-0.09375	0.08247	-0.10315	0.08315	-0.06876	0.09995
49657	OX382158.1	1839962	0.02778	0.08877	0.02349	0.08132	0.02407	0.09696
49664	OX382158.1	1843599	0.74277	0.08915	0.68411	0.08107	0.57366	0.09663
49699	OX382158.1	1863152	0.07407	0.09091	0.01370	0.07951	-0.04779	0.09467
49735	OX382158.1	1896132	0.15916	0.09212	0.03327	0.07554	0.08333	0.09002
49736	OX382158.1	1896135	0.32112	0.09212	0.29219	0.07554	0.33219	0.09002
49762	OX382158.1	1913414	-0.03120	0.09181	-0.03413	0.07287	-0.00455	0.08698
49833	OX382158.1	1978056	-0.09375	0.08404	-0.10315	0.06001	-0.06876	0.07228
49977	OX382158.1	2104122	0.10923	0.04838	0.02003	0.02867	0.01786	0.03724
50049	OX382158.1	2154386	-0.01299	0.03909	-0.00833	0.02119	0.03140	0.03031
50050	OX382158.1	2154389	0.09581	0.03909	0.18478	0.02119	0.18441	0.03031
50081	OX382158.1	2199479	-0.11628	0.03737	-0.13089	0.01857	-0.17998	0.03103
50152	OX382158.1	2247426	-0.11111	0.04245	-0.11429	0.02017	-0.16667	0.03853
50316	OX382158.1	2383450	0.11036	0.05999	0.15022	0.02260	0.14754	0.05820
50360	OX382158.1	2402210	0.31995	0.06034	0.36445	0.02197	0.45070	0.05844
50389	OX382158.1	2425920	-0.11628	0.06022	-0.13089	0.02112	-0.17998	0.05809
50403	OX382158.1	2433803	0.24153	0.06007	0.05988	0.02086	0.21429	0.05783
50417	OX382158.1	2441258	0.24153	0.05967	0.05988	0.02046	0.25000	0.05734
50423	OX382158.1	2444387	-0.06329	0.05947	-0.06126	0.02028	-0.06069	0.05710
50456	OX382158.1	2472785	0.13669	0.05681	0.03069	0.01842	0.04027	0.05405
50493	OX382158.1	2490238	-0.03120	0.05426	-0.13198	0.01693	-0.06013	0.05128
50510	OX382158.1	2494440	-0.09191	0.05359	-0.09496	0.01657	-0.06364	0.05054
50560	OX382158.1	2530460	0.10791	0.04644	0.11226	0.01298	0.14754	0.04292
50747	OX382158.1	2684012	-0.10092	0.00214	-0.11214	-0.00851	-0.15643	-0.00109
50761	OX382158.1	2692706	0.47712	-0.00005	0.50345	-0.00973	0.43254	-0.00314
50762	OX382158.1	2692728	-0.09681	-0.00006	-0.04296	-0.00973	-0.07888	-0.00315
50770	OX382158.1	2698312	-0.06329	-0.00130	-0.06126	-0.01040	-0.06069	-0.00426
50876	OX382158.1	2761989	-0.09091	-0.01116	-0.10000	-0.01595	-0.07789	-0.01308
50891	OX382158.1	2771413	-0.06329	-0.01170	-0.06126	-0.01620	-0.06069	-0.01348
50916	OX382158.1	2791019	-0.09375	-0.01179	-0.10315	-0.01588	-0.06876	-0.01334
50984	OX382158.1	2842794	-0.03120	-0.00631	-0.03413	-0.01042	-0.00455	-0.00765
50986	OX382158.1	2844051	-0.11111	-0.00607	-0.12500	-0.01018	-0.17857	-0.00741
50987	OX382158.1	2844054	-0.09191	-0.00607	-0.09496	-0.01018	-0.06364	-0.00741
51080	OX382158.1	2938875	-0.09375	0.02159	-0.10315	0.01662	-0.06876	0.01930
51147	OX382158.1	3006577	-0.03120	0.04069	-0.03413	0.03643	-0.00455	0.03777
51185	OX382158.1	3026600	0.65784	0.04373	0.56174	0.04009	0.56000	0.04096
51191	OX382158.1	3032716	-0.02418	0.04434	-0.00296	0.04092	-0.07262	0.04165
51194	OX382158.1	3033113	-0.06201	0.04438	-0.05419	0.04097	-0.01230	0.04169
51260	OX382158.1	3087790	0.13198	0.04259	0.28058	0.04182	0.20885	0.04157
51274	OX382158.1	3093776	0.10923	0.04164	0.02003	0.04120	0.01786	0.04089
51412	OX382158.1	3220753	-0.09091	0.00013	-0.10000	0.00711	-0.07789	0.00800
51450	OX382158.1	3237506	-0.03733	-0.00619	-0.00401	0.00159	-0.01090	0.00289
51501	OX382158.1	3270483	-0.08151	-0.01792	-0.02962	-0.00876	-0.02997	-0.00662
51505	OX382158.1	3271830	-0.08387	-0.01837	-0.09150	-0.00916	-0.09160	-0.00699
51512	OX382158.1	3279657	-0.07811	-0.02095	-0.06198	-0.01146	-0.06254	-0.00907
51543	OX382158.1	3299339	-0.03120	-0.02684	-0.03413	-0.01665	-0.00455	-0.01375
51835	OX382159.1	91179	-0.07248	0.00356	-0.04555	0.00903	-0.03215	0.00038
51866	OX382159.1	103516	0.16667	0.00346	0.34545	0.00885	0.24205	0.00031
51886	OX382159.1	117981	-0.09091	0.00337	-0.07843	0.00876	-0.05848	0.00045
51900	OX382159.1	122899	-0.11111	0.00330	-0.12500	0.00868	-0.17857	0.00044
51928	OX382159.1	138584	-0.09091	0.00306	-0.10000	0.00845	-0.07789	0.00042
51950	OX382159.1	145161	0.09091	0.00296	0.01786	0.00835	0.00325	0.00042
51962	OX382159.1	151390	0.19826	0.00286	0.16269	0.00825	0.16023	0.00043
52002	OX382159.1	164454	0.15916	0.00259	0.03327	0.00796	0.08333	0.00041
52013	OX382159.1	171182	-0.07811	0.00248	-0.17015	0.00784	-0.17076	0.00044
52032	OX382159.1	181884	-0.06329	0.00232	-0.06126	0.00765	-0.06069	0.00050
52045	OX382159.1	192918	-0.03630	0.00216	-0.00240	0.00745	-0.00455	0.00060
52078	OX382159.1	209901	0.00297	0.00195	0.10842	0.00714	0.10545	0.00083
52080	OX382159.1	211807	0.12187	0.00193	0.13070	0.00710	0.01744	0.00086
52083	OX382159.1	213117	-0.01675	0.00191	0.05753	0.00708	0.07143	0.00088
52143	OX382159.1	258083	-0.12676	0.00186	-0.14490	0.00635	-0.19380	0.00225
52159	OX382159.1	267531	-0.02084	0.00196	0.09571	0.00623	0.09302	0.00270
52380	OX382159.1	378046	-0.02833	0.00865	-0.12073	0.00689	-0.12304	0.01388
52402	OX382159.1	389518	0.01642	0.00997	0.01604	0.00726	0.01476	0.01566
52419	OX382159.1	402661	-0.07811	0.01162	-0.06198	0.00776	-0.06254	0.01778
52492	OX382159.1	445089	0.03309	0.01765	0.03522	0.00968	0.03574	0.02488
52495	OX382159.1	446209	-0.06329	0.01776	-0.06126	0.00951	-0.06069	0.02485
52536	OX382159.1	472795	0.12142	0.02213	0.17382	0.01086	0.17598	0.02908
52591	OX382159.1	508957	0.01642	0.02817	0.01604	0.01250	0.01476	0.03381
52603	OX382159.1	513708	0.05796	0.02894	-0.02759	0.01266	0.20201	0.03430
52666	OX382159.1	552478	0.10923	0.03479	0.02003	0.01332	0.01786	0.03674
52682	OX382159.1	563444	0.21311	0.03626	0.23132	0.01312	0.34524	0.03683
52761	OX382159.1	607589	-0.09375	0.04179	-0.10315	0.01225	-0.06876	0.03541
52915	OX382159.1	706876	0.10433	0.04787	0.04223	0.00507	0.02298	0.02095
52948	OX382159.1	725278	-0.07280	0.04792	-0.07840	0.00341	-0.07866	0.01773
52979	OX382159.1	741604	0.10923	0.04742	0.02003	0.00191	0.01786	0.01489
52983	OX382159.1	742457	0.10923	0.04739	0.02003	0.00183	0.01786	0.01475
53191	OX382159.1	896013	-0.06061	0.02731	-0.26923	-0.01217	-0.23631	-0.00424
53193	OX382159.1	900413	0.23575	0.02652	0.22452	-0.01253	0.22637	-0.00458
53203	OX382159.1	907542	0.10923	0.02509	0.02003	-0.01317	0.01786	-0.00521
53212	OX382159.1	916990	-0.09039	0.02328	-0.08548	-0.01398	-0.07401	-0.00601
53229	OX382159.1	926858	0.19217	0.02122	0.20351	-0.01498	0.20310	-0.00698
53238	OX382159.1	929768	0.03030	0.02064	-0.03125	-0.01522	-0.03874	-0.00720
53313	OX382159.1	978308	-0.07811	0.01122	-0.06198	-0.01877	-0.06254	-0.01059
53336	OX382159.1	991937	-0.09191	0.00876	-0.09496	-0.01954	-0.06364	-0.01130
53420	OX382159.1	1043979	-0.07280	0.00087	-0.07840	-0.02102	-0.07866	-0.01289
53477	OX382159.1	1067385	-0.06201	-0.00154	-0.05419	-0.02056	-0.01230	-0.01262
53520	OX382159.1	1099800	-0.09375	-0.00355	-0.10315	-0.01874	-0.06876	-0.01125
53560	OX382159.1	1126556	0.01642	-0.00399	0.01604	-0.01618	0.01476	-0.00919
53571	OX382159.1	1129830	0.10923	-0.00396	0.02003	-0.01580	0.01786	-0.00888
53586	OX382159.1	1134434	-0.06972	-0.00389	-0.06136	-0.01524	-0.06364	-0.00842
53631	OX382159.1	1217962	-0.06329	0.00169	-0.06126	-0.00257	-0.06069	0.00267
53819	OX382159.1	1315320	0.10923	0.01053	0.02003	0.00822	0.01786	0.01350
53834	OX382159.1	1328258	0.11672	0.01159	0.47239	0.00908	0.47135	0.01459
53835	OX382159.1	1328261	0.00000	0.01159	-0.04762	0.00908	-0.06122	0.01459
53838	OX382159.1	1332080	-0.06329	0.01181	-0.06126	0.00922	-0.06069	0.01480
53848	OX382159.1	1337583	-0.06329	0.01210	-0.06126	0.00938	-0.06069	0.01507
53856	OX382159.1	1341409	-0.06329	0.01228	-0.06126	0.00947	-0.06069	0.01525
53896	OX382159.1	1360403	0.13669	0.01310	0.03069	0.00974	0.00028	0.01598
53931	OX382159.1	1393944	-0.01010	0.01384	-0.00800	0.00887	0.06024	0.01606
53938	OX382159.1	1398268	0.10923	0.01391	0.02003	0.00870	0.01786	0.01603
54011	OX382159.1	1452843	0.13772	0.01367	0.04077	0.00499	0.07682	0.01414
54049	OX382159.1	1471668	-0.06329	0.01346	-0.06126	0.00331	-0.06069	0.01306
54070	OX382159.1	1482206	0.01642	0.01330	0.01604	0.00233	0.01476	0.01240
54102	OX382159.1	1495199	-0.06201	0.01323	-0.05419	0.00118	-0.01230	0.01165
54197	OX382159.1	1574210	-0.11628	0.01430	-0.13089	-0.00482	-0.08686	0.00652
54361	OX382159.1	1707282	0.11111	0.02110	0.02703	-0.00578	0.03140	0.00077
54379	OX382159.1	1718380	-0.11111	0.02118	-0.12500	-0.00585	-0.14337	0.00018
54443	OX382159.1	1761567	-0.09375	0.02026	-0.10315	-0.00673	-0.06876	-0.00262
54453	OX382159.1	1765487	0.35537	0.02001	0.35833	-0.00689	0.38362	-0.00293
54514	OX382159.1	1801372	0.32011	0.01786	0.13586	-0.00862	0.15050	-0.00602
54549	OX382159.1	1822448	-0.07280	0.01620	-0.07840	-0.00966	-0.07866	-0.00784
54550	OX382159.1	1822451	-0.07811	0.01620	-0.06198	-0.00966	-0.06254	-0.00784
54559	OX382159.1	1831618	0.06977	0.01539	0.01478	-0.01017	-0.02031	-0.00867
54606	OX382159.1	1857607	-0.07280	0.01286	-0.07840	-0.01174	-0.07866	-0.01113
54608	OX382159.1	1858172	-0.07811	0.01280	-0.06198	-0.01177	-0.06254	-0.01119
54662	OX382159.1	1890060	0.01642	0.00946	0.01604	-0.01381	0.01476	-0.01424
54663	OX382159.1	1890063	-0.09091	0.00946	-0.10000	-0.01381	-0.07789	-0.01424
54701	OX382159.1	1913669	0.13669	0.00690	0.03069	-0.01527	0.00028	-0.01647
54842	OX382159.1	2005774	-0.11111	-0.00173	-0.11429	-0.01949	-0.16667	-0.02377
54881	OX382159.1	2029730	-0.09375	-0.00329	-0.10315	-0.02004	-0.06876	-0.02528
54913	OX382159.1	2052064	-0.09375	-0.00454	-0.10315	-0.02049	-0.06876	-0.02662
54923	OX382159.1	2055640	0.06977	-0.00471	0.01478	-0.02055	-0.02031	-0.02683
54933	OX382159.1	2059059	0.13726	-0.00487	0.17836	-0.02061	0.17816	-0.02703
54999	OX382159.1	2151683	-0.11863	-0.00686	-0.06749	-0.02199	-0.12428	-0.03214
55121	OX382159.1	2242552	-0.07280	-0.00758	-0.07840	-0.02538	-0.07866	-0.03717
55140	OX382159.1	2252859	0.21311	-0.00814	0.05677	-0.02607	0.02543	-0.03782
55164	OX382159.1	2271229	0.04642	-0.00847	0.05020	-0.02704	0.00510	-0.03844
55257	OX382159.1	2324544	-0.11111	-0.00865	-0.12500	-0.02931	-0.14337	-0.03873
55318	OX382159.1	2364827	-0.06201	-0.00886	-0.05419	-0.03080	-0.01230	-0.03762
55532	OX382159.1	2633974	0.09091	0.02770	0.01786	-0.01839	0.00325	0.00432
55572	OX382159.1	2662033	0.02041	0.02697	0.02041	-0.01979	0.06024	0.00458
55640	OX382159.1	2708400	-0.09375	0.02225	-0.10315	-0.02392	-0.06876	0.00322
55705	OX382159.1	2739853	0.11111	0.01742	0.02703	-0.02755	0.03626	0.00119
55740	OX382159.1	2760796	0.15916	0.01296	0.03327	-0.03066	0.08333	-0.00121
55823	OX382159.1	2827675	-0.09375	-0.00524	-0.10315	-0.04219	-0.06876	-0.01014
56022	OX382159.1	2992662	-0.03120	-0.04280	-0.03413	-0.06571	-0.00455	-0.03827
56031	OX382159.1	2994651	-0.03120	-0.04294	-0.03413	-0.06582	-0.00455	-0.03858
56062	OX382159.1	3020781	-0.09375	-0.04409	-0.10315	-0.06698	-0.06876	-0.04248
56131	OX382159.1	3069923	-0.09091	-0.04318	-0.10000	-0.06752	-0.07789	-0.04941
56132	OX382159.1	3069977	-0.10891	-0.04318	-0.12112	-0.06752	0.09206	-0.04942
56193	OX382159.1	3105829	-0.10092	-0.04071	-0.11214	-0.06693	-0.15643	-0.05434
56216	OX382159.1	3124136	-0.09091	-0.03894	-0.10000	-0.06638	-0.07789	-0.05689
56289	OX382159.1	3175933	0.24528	-0.03254	0.11504	-0.06384	0.08333	-0.06379
56301	OX382159.1	3188216	0.00000	-0.03086	0.00000	-0.06315	-0.03648	-0.06545
56314	OX382159.1	3199983	-0.08851	-0.02937	-0.18616	-0.06256	-0.45918	-0.06716
56435	OX382160.1	53155	-0.01299	-0.03429	-0.00833	-0.04625	0.03140	-0.02893
56441	OX382160.1	54511	0.10923	-0.03423	0.02003	-0.04613	0.01786	-0.02886
56523	OX382160.1	77975	-0.09375	-0.03281	-0.10315	-0.04385	-0.06876	-0.02738
56595	OX382160.1	115546	-0.09375	-0.02930	-0.10315	-0.03905	-0.06876	-0.02399
56618	OX382160.1	125752	-0.09091	-0.02808	-0.10000	-0.03752	-0.07789	-0.02287
56656	OX382160.1	147967	-0.09375	-0.02501	-0.10315	-0.03387	-0.06876	-0.02017
56665	OX382160.1	150232	-0.07811	-0.02468	-0.06198	-0.03348	-0.06254	-0.01988
56717	OX382160.1	186495	-0.07280	-0.01876	-0.07840	-0.02672	-0.07866	-0.01467
56779	OX382160.1	223996	-0.09091	-0.01184	-0.03623	-0.01916	-0.02031	-0.00864
56823	OX382160.1	249947	-0.09375	-0.00710	-0.10315	-0.01408	-0.06876	-0.00449
56871	OX382160.1	274188	0.19826	-0.00279	0.16269	-0.00952	0.16023	-0.00070
56958	OX382160.1	324746	-0.06329	0.00536	-0.06126	-0.00096	-0.06069	0.00673
56985	OX382160.1	343140	0.11111	0.00775	0.02703	0.00152	-0.03215	0.00895
56987	OX382160.1	345736	0.23575	0.00806	0.22452	0.00185	0.22637	0.00924
56988	OX382160.1	345739	0.01642	0.00806	0.01604	0.00185	0.01476	0.00924
56998	OX382160.1	349392	-0.07280	0.00849	-0.07840	0.00229	-0.07866	0.00965
57040	OX382160.1	376943	0.03309	0.01133	0.03522	0.00525	0.03574	0.01242
57123	OX382160.1	429019	0.07763	0.01516	0.06126	0.00920	0.06350	0.01636
57132	OX382160.1	434038	-0.09907	0.01545	-0.02004	0.00950	0.08062	0.01667
57180	OX382160.1	458365	-0.02268	0.01666	-0.05890	0.01068	-0.05814	0.01792
57214	OX382160.1	478547	-0.09091	0.01764	-0.10000	0.01161	-0.07789	0.01890
57216	OX382160.1	478587	-0.11111	0.01765	-0.12500	0.01161	-0.17857	0.01890
57220	OX382160.1	482789	0.15916	0.01785	0.03327	0.01179	0.08333	0.01909
57235	OX382160.1	490890	0.06388	0.01825	0.23793	0.01215	0.20062	0.01946
57349	OX382160.1	560754	-0.01010	0.02228	-0.00800	0.01558	0.06024	0.02262
57397	OX382160.1	590529	0.09091	0.02439	0.01786	0.01722	0.00325	0.02387
57405	OX382160.1	594894	-0.06329	0.02469	-0.06126	0.01746	-0.06069	0.02404
57442	OX382160.1	624360	0.03309	0.02692	0.03522	0.01921	0.03574	0.02522
57475	OX382160.1	647288	0.12132	0.02855	0.10420	0.02045	0.14200	0.02594
57491	OX382160.1	667636	0.01642	0.02974	0.01604	0.02125	0.01476	0.02621
57509	OX382160.1	675810	-0.09091	0.03025	-0.10000	0.02156	-0.07789	0.02629
57597	OX382160.1	716420	0.01335	0.03161	0.00113	0.02238	0.00000	0.02587
57623	OX382160.1	728862	-0.07811	0.03140	-0.06198	0.02202	-0.06254	0.02516
57632	OX382160.1	730748	0.40269	0.03139	0.39250	0.02198	0.39117	0.02506
57714	OX382160.1	792957	0.06977	0.02821	0.01478	0.01772	-0.02031	0.01923
57912	OX382160.1	901240	-0.06329	0.01657	-0.06126	0.00408	-0.06069	0.00531
57921	OX382160.1	905422	-0.06329	0.01628	-0.06126	0.00373	-0.06069	0.00503
58025	OX382160.1	984846	0.03309	0.01667	0.03522	0.00313	0.03574	0.00589
58093	OX382160.1	1021929	-0.11111	0.02012	-0.12500	0.00618	-0.14337	0.00955
58116	OX382160.1	1030017	-0.09191	0.02099	-0.09496	0.00698	-0.06364	0.01048
58119	OX382160.1	1030322	0.10923	0.02102	0.02003	0.00701	0.01786	0.01052
58223	OX382160.1	1105858	0.10923	0.03075	0.02003	0.01606	0.01786	0.02059
58230	OX382160.1	1108460	-0.09681	0.03108	-0.04296	0.01637	-0.01316	0.02092
58251	OX382160.1	1128193	-0.03454	0.03355	-0.05964	0.01867	-0.05978	0.02341
58264	OX382160.1	1137047	0.18481	0.03454	0.31834	0.01959	0.31905	0.02442
58312	OX382160.1	1166879	-0.03030	0.03752	-0.03125	0.02228	-0.02143	0.02738
58322	OX382160.1	1176957	0.02778	0.03834	0.02349	0.02302	0.02407	0.02821
58343	OX382160.1	1184222	-0.10414	0.03874	-0.11576	0.02333	-0.10000	0.02859
58352	OX382160.1	1186512	0.10923	0.03891	0.02003	0.02348	0.01786	0.02876
58361	OX382160.1	1192865	0.07763	0.03934	0.06126	0.02385	0.06350	0.02920
58434	OX382160.1	1243407	0.10923	0.04089	0.02003	0.02489	0.01786	0.03097
58470	OX382160.1	1262101	-0.09091	0.04078	-0.10000	0.02447	-0.07789	0.03084
58474	OX382160.1	1263553	0.15152	0.04075	0.13158	0.02442	0.11728	0.03081
58493	OX382160.1	1278283	0.10923	0.04025	0.02003	0.02368	0.01786	0.03037
58518	OX382160.1	1296697	0.10791	0.03932	0.11226	0.02238	0.14754	0.02945
58526	OX382160.1	1303501	0.01642	0.03888	0.01604	0.02179	0.01476	0.02900
58537	OX382160.1	1316951	-0.06329	0.03788	-0.06126	0.02046	-0.06069	0.02798
58569	OX382160.1	1342398	0.47017	0.03549	0.54556	0.01732	0.54603	0.02547
58580	OX382160.1	1347945	0.07370	0.03489	0.07225	0.01654	0.07143	0.02483
58584	OX382160.1	1348315	-0.09091	0.03485	-0.10000	0.01649	-0.07789	0.02478
58664	OX382160.1	1406196	-0.11111	0.02776	-0.12500	0.00704	-0.17857	0.01680
58711	OX382160.1	1437895	-0.01260	0.02353	-0.02733	0.00128	-0.02945	0.01172
58739	OX382160.1	1460762	-0.09091	0.02054	-0.22222	-0.00270	-0.18672	0.00814
58752	OX382160.1	1465657	-0.02020	0.01994	0.00000	-0.00353	0.02500	0.00739
58753	OX382160.1	1465686	-0.01010	0.01994	-0.00800	-0.00353	-0.01418	0.00738
58768	OX382160.1	1475624	-0.09091	0.01882	-0.10000	-0.00511	-0.07789	0.00595
58816	OX382160.1	1504231	-0.06201	0.01544	-0.05419	-0.00958	-0.01230	0.00185
58822	OX382160.1	1506385	0.10923	0.01521	0.02003	-0.00989	0.01786	0.00156
58824	OX382160.1	1506432	-0.02593	0.01521	-0.00230	-0.00989	0.00418	0.00156
58831	OX382160.1	1510181	-0.10891	0.01482	-0.12112	-0.01041	0.09206	0.00107
58886	OX382160.1	1547865	0.29630	0.01114	0.12903	-0.01492	0.02838	-0.00321
58942	OX382160.1	1595418	0.11111	0.00692	0.02703	-0.01884	-0.03215	-0.00691
59001	OX382160.1	1634010	0.04050	0.00363	0.02940	-0.02036	-0.00862	-0.00802
59048	OX382160.1	1666875	-0.09191	0.00029	-0.09496	-0.02134	-0.06364	-0.00831
59067	OX382160.1	1681555	-0.09375	-0.00151	-0.10315	-0.02181	-0.06876	-0.00836
59088	OX382160.1	1691882	-0.09375	-0.00271	-0.10315	-0.02198	-0.06876	-0.00818
59096	OX382160.1	1696498	0.13669	-0.00338	0.03069	-0.02214	0.00028	-0.00816
59110	OX382160.1	1703855	0.02778	-0.00435	0.02349	-0.02235	0.02407	-0.00809
59146	OX382160.1	1726847	-0.06201	-0.00767	-0.05419	-0.02324	-0.01230	-0.00799
59209	OX382160.1	1766095	0.07763	-0.01438	0.06126	-0.02584	0.06350	-0.00861
59269	OX382160.1	1827554	0.10791	-0.02603	0.11226	-0.03270	0.14754	-0.01228
59360	OX382160.1	1886333	-0.07811	-0.03676	-0.06198	-0.04294	-0.06254	-0.01999
59371	OX382160.1	1890059	-0.00699	-0.03742	0.14894	-0.04368	0.18052	-0.02059
59372	OX382160.1	1890062	-0.11628	-0.03742	-0.13089	-0.04368	-0.11429	-0.02059
59424	OX382160.1	1929052	-0.09191	-0.04367	-0.09496	-0.05226	-0.06364	-0.02762
59425	OX382160.1	1929055	-0.09375	-0.04367	-0.10315	-0.05227	-0.06876	-0.02762
59443	OX382160.1	1945255	-0.07106	-0.04590	-0.06248	-0.05600	0.09494	-0.03089
59472	OX382160.1	1968231	-0.06201	-0.04901	-0.05419	-0.06158	-0.01230	-0.03573
59473	OX382160.1	1968672	-0.11628	-0.04906	-0.13089	-0.06169	-0.11429	-0.03582
59487	OX382160.1	1985170	0.13669	-0.05106	0.03069	-0.06583	0.00028	-0.03935
59495	OX382160.1	1995400	-0.08094	-0.05211	-0.03261	-0.06838	0.00028	-0.04153
59509	OX382160.1	2008403	-0.09039	-0.05365	-0.08548	-0.07183	-0.12755	-0.04436
59514	OX382160.1	2011417	-0.09375	-0.05395	-0.10315	-0.07261	-0.06876	-0.04501
59608	OX382160.1	2106387	-0.03389	-0.06043	-0.35000	-0.09617	-0.31268	-0.06173
59635	OX382160.1	2127308	-0.11628	-0.06090	-0.13089	-0.10053	-0.11429	-0.06383
59637	OX382160.1	2127895	-0.11628	-0.06091	-0.13089	-0.10064	-0.11429	-0.06388
59655	OX382160.1	2134933	0.10791	-0.06088	0.11226	-0.10186	0.14754	-0.06431
59736	OX382160.1	2201826	-0.11628	-0.05804	-0.13089	-0.10959	-0.11429	-0.06375
59745	OX382160.1	2207058	-0.11628	-0.05753	-0.13089	-0.10976	-0.11429	-0.06328
59746	OX382160.1	2209484	-0.11628	-0.05728	-0.13089	-0.10982	-0.11429	-0.06305
59772	OX382160.1	2233445	-0.10552	-0.05441	-0.02395	-0.10968	0.00065	-0.06013
59799	OX382160.1	2264096	-0.11111	-0.04934	-0.12500	-0.10726	-0.09272	-0.05474
59806	OX382160.1	2277838	-0.09091	-0.04675	-0.37500	-0.10556	-0.32000	-0.05201
59815	OX382160.1	2284467	-0.11628	-0.04519	-0.13089	-0.10421	-0.11429	-0.05028
59823	OX382160.1	2288402	-0.11628	-0.04431	-0.13089	-0.10351	-0.11429	-0.04935
59839	OX382160.1	2307902	0.07204	-0.03953	-0.05882	-0.09908	0.02419	-0.04416
59850	OX382160.1	2312774	-0.11111	-0.03829	-0.12500	-0.09792	0.02174	-0.04285
59884	OX382160.1	2343161	-0.11546	-0.02999	-0.55491	-0.08956	-0.03698	-0.03428
59942	OX382160.1	2386273	0.21311	-0.01687	0.07758	-0.07398	0.05826	-0.02064
59948	OX382160.1	2388825	-0.07920	-0.01608	-0.06668	-0.07297	-0.05978	-0.01983
59960	OX382160.1	2402136	0.02778	-0.01183	0.14286	-0.06752	0.20201	-0.01559
59982	OX382160.1	2414287	-0.06716	-0.00800	-0.12623	-0.06238	-0.17807	-0.01169
59986	OX382160.1	2416230	-0.10266	-0.00740	-0.15132	-0.06150	0.20977	-0.01107
60044	OX382160.1	2440005	0.18089	-0.00005	0.05232	-0.05096	-0.01230	-0.00356
60109	OX382160.1	2468037	-0.01281	0.00844	-0.00410	-0.03795	-0.00156	0.00518
60149	OX382160.1	2489602	0.06977	0.01429	0.01478	-0.02789	-0.02031	0.01149
60198	OX382160.1	2511058	0.09465	0.01950	0.14737	-0.01803	0.23751	0.01744
60255	OX382160.1	2533246	0.10923	0.02406	0.02003	-0.00820	0.01786	0.02319
60319	OX382160.1	2581898	0.03309	0.03117	0.03522	0.01165	0.03574	0.03485
60386	OX382160.1	2617883	0.10923	0.03284	0.02003	0.02262	0.01786	0.04107
60498	OX382160.1	2727800	-0.07892	0.03038	-0.08578	0.04125	-0.13043	0.05404
60502	OX382160.1	2731349	0.03306	0.03031	0.08333	0.04178	0.07808	0.05455
60504	OX382160.1	2732158	0.10791	0.03027	0.11226	0.04184	0.14754	0.05460
60519	OX382160.1	2743179	0.13726	0.02997	0.17836	0.04269	0.17816	0.05551
60529	OX382160.1	2747753	-0.00887	0.02978	0.06968	0.04292	0.06840	0.05579
60532	OX382160.1	2749315	-0.06329	0.02972	-0.06126	0.04300	-0.06069	0.05589
60544	OX382160.1	2776919	-0.06201	0.02891	-0.05419	0.04422	-0.01230	0.05752
60622	OX382160.1	2824385	-0.02451	0.02854	0.20619	0.04539	0.29902	0.05997
60623	OX382160.1	2824388	0.17768	0.02854	0.17768	0.04539	0.17816	0.05997
60651	OX382160.1	2848026	0.06977	0.02880	0.01478	0.04564	0.05323	0.06111
60675	OX382160.1	2864705	-0.09091	0.02922	-0.10000	0.04579	-0.07789	0.06189
60677	OX382160.1	2865136	0.05390	0.02923	0.03102	0.04579	0.03378	0.06191
60681	OX382160.1	2870320	-0.06667	0.02942	-0.05882	0.04589	-0.12304	0.06205
60822	OX382160.1	2991751	0.24153	0.03323	0.05988	0.04535	0.21429	0.06524
60846	OX382160.1	3010282	0.03030	0.03361	0.36538	0.04508	0.36413	0.06536
60856	OX382160.1	3017334	0.10923	0.03371	0.02003	0.04496	0.01786	0.06538
60869	OX382160.1	3027951	-0.06329	0.03383	-0.06126	0.04476	-0.06069	0.06538
60882	OX382160.1	3034694	0.04382	0.03388	0.01008	0.04463	0.05797	0.06539
60888	OX382160.1	3038171	-0.07096	0.03389	-0.05964	0.04455	-0.05978	0.06537
60920	OX382160.1	3060750	-0.09375	0.03386	-0.10315	0.04399	-0.06876	0.06519
60947	OX382160.1	3074893	-0.05882	0.03365	-0.04762	0.04360	-0.06122	0.06505
60951	OX382160.1	3076905	0.40269	0.03362	0.39250	0.04354	0.39117	0.06501
61032	OX382160.1	3128242	-0.06329	0.03232	-0.06126	0.04164	-0.06069	0.06392
61076	OX382160.1	3157265	-0.03973	0.03110	-0.00293	0.04031	0.09302	0.06310
61138	OX382161.1	1801	0.32112	0.04124	0.29219	-0.00225	0.33219	0.00817
61285	OX382161.1	85069	0.19217	0.01705	0.20351	-0.03311	0.20310	-0.02370
61344	OX382161.1	120453	-0.09091	0.01072	-0.07843	-0.04160	-0.05848	-0.03236
61380	OX382161.1	140354	-0.07892	0.00845	-0.08578	-0.04484	-0.13043	-0.03562
61389	OX382161.1	143115	0.08101	0.00821	0.05753	-0.04520	0.07143	-0.03597
61407	OX382161.1	156508	-0.11111	0.00732	-0.12500	-0.04660	-0.17857	-0.03733
61414	OX382161.1	160689	-0.01281	0.00713	0.10842	-0.04693	0.10545	-0.03764
61459	OX382161.1	186674	-0.04406	0.00699	-0.73815	-0.04766	-0.59110	-0.03815
61468	OX382161.1	195365	-0.11111	0.00735	-0.12500	-0.04741	-0.14337	-0.03779
61506	OX382161.1	215645	-0.06329	0.00896	-0.06126	-0.04582	-0.06069	-0.03585
61534	OX382161.1	227758	-0.07752	0.01046	-0.07711	-0.04421	-0.06122	-0.03397
61647	OX382161.1	299112	0.06977	0.02652	0.01478	-0.02555	-0.02031	-0.01258
61686	OX382161.1	327331	-0.02833	0.03539	-0.02249	-0.01503	-0.02143	-0.00042
61767	OX382161.1	384752	0.04328	0.05449	0.00816	0.00770	0.00325	0.02644
61774	OX382161.1	386101	0.09091	0.05492	0.01786	0.00822	0.00325	0.02706
61846	OX382161.1	443590	0.57402	0.07091	0.58695	0.02733	0.60011	0.05077
61848	OX382161.1	443836	-0.09375	0.07097	-0.10315	0.02740	-0.06876	0.05086
61866	OX382161.1	453397	0.02041	0.07283	0.00415	0.02968	0.08675	0.05387
61931	OX382161.1	495953	0.15916	0.07995	0.03327	0.03845	0.08333	0.06572
61940	OX382161.1	502271	-0.02742	0.08066	-0.02759	0.03937	0.02298	0.06706
61967	OX382161.1	517325	0.25926	0.08198	0.13600	0.04119	0.20408	0.06981
62023	OX382161.1	557052	-0.09091	0.08287	-0.10000	0.04335	-0.07789	0.07402
62206	OX382161.1	699125	0.06282	0.05990	0.05753	0.03286	0.07143	0.06192
62382	OX382161.1	872149	-0.09375	0.03913	-0.10315	0.04321	-0.06876	0.04014
62485	OX382161.1	1016343	0.26154	0.07816	0.51220	0.07429	0.33021	0.04761
62493	OX382161.1	1039165	0.07763	0.08144	0.06126	0.07404	0.06350	0.04631
62624	OX382161.1	1158999	0.33300	0.07566	0.13586	0.05551	0.10330	0.03207
62663	OX382161.1	1183249	-0.06329	0.07084	-0.06126	0.05024	-0.06069	0.02966
62675	OX382161.1	1192225	-0.01010	0.06833	-0.00800	0.04779	-0.06122	0.02842
62843	OX382161.1	1314616	-0.01010	0.03565	-0.00800	0.02245	-0.06122	0.02557
62868	OX382161.1	1332342	0.20635	0.03098	0.20800	0.01910	0.15385	0.02554
62981	OX382161.1	1423738	-0.09790	0.00998	-0.07616	0.00275	-0.06122	0.02076
62993	OX382161.1	1442785	-0.10092	0.00667	-0.11214	-0.00008	0.03509	0.01879
63003	OX382161.1	1455223	0.02041	0.00492	0.02041	-0.00163	0.06024	0.01746
63026	OX382161.1	1477098	0.19026	0.00192	0.17836	-0.00443	0.17816	0.01469
63057	OX382161.1	1513275	-0.09039	-0.00164	-0.08548	-0.00763	0.06153	0.01015
63151	OX382161.1	1575350	0.08081	-0.00423	0.00901	-0.01009	-0.01526	0.00313
63192	OX382161.1	1601306	-0.07692	-0.00412	-0.05769	-0.00994	-0.05978	0.00107
63209	OX382161.1	1611941	-0.07280	-0.00413	-0.07840	-0.00982	-0.07866	0.00031
63242	OX382161.1	1633517	-0.11111	-0.00307	-0.12500	-0.00910	-0.17857	-0.00087
63247	OX382161.1	1639696	-0.09091	-0.00275	-0.10000	-0.00883	-0.07789	-0.00111
63314	OX382161.1	1674132	-0.06329	-0.00041	-0.06126	-0.00684	-0.06069	-0.00173
63349	OX382161.1	1690968	0.23240	0.00095	0.31834	-0.00574	0.31905	-0.00177
63414	OX382161.1	1720416	0.09091	0.00354	0.01786	-0.00376	0.00325	-0.00151
63464	OX382161.1	1749854	-0.09091	0.00650	-0.10000	-0.00190	-0.07789	-0.00094
63478	OX382161.1	1757720	-0.11111	0.00726	-0.12500	-0.00148	-0.14337	-0.00083
63620	OX382161.1	1844994	0.01642	0.01485	0.01604	0.00113	0.01476	-0.00015
63621	OX382161.1	1844997	0.27012	0.01485	0.25778	0.00113	0.26201	-0.00015
63647	OX382161.1	1867681	-0.09375	0.01659	-0.10315	0.00111	-0.06876	-0.00027
63654	OX382161.1	1871133	-0.05263	0.01677	-0.03687	0.00103	-0.07817	-0.00036
63692	OX382161.1	1895270	0.19826	0.01824	0.16269	0.00054	0.16023	-0.00084
63706	OX382161.1	1897254	-0.06329	0.01835	-0.06126	0.00049	-0.06069	-0.00087
63821	OX382161.1	1974358	0.06977	0.02406	0.01478	-0.00017	-0.02031	0.00014
63897	OX382161.1	2012933	-0.11628	0.02772	-0.13089	0.00076	-0.11429	0.00280
63899	OX382161.1	2014495	-0.11628	0.02788	-0.13089	0.00082	-0.11429	0.00294
63917	OX382161.1	2027808	-0.06600	0.02927	-0.06038	0.00144	-0.05848	0.00425
63918	OX382161.1	2028925	0.06061	0.02939	0.08333	0.00150	0.10625	0.00437
63953	OX382161.1	2071319	0.06526	0.03479	-0.15714	0.00474	-0.27782	0.01000
63979	OX382161.1	2081667	0.10923	0.03619	0.02003	0.00578	0.01786	0.01161
64052	OX382161.1	2119997	0.09091	0.04161	0.01786	0.01001	0.00325	0.01819
64059	OX382161.1	2123215	0.03030	0.04213	0.18519	0.01046	0.18519	0.01882
64082	OX382161.1	2141432	-0.01587	0.04479	-0.01739	0.01262	-0.00923	0.02207
64093	OX382161.1	2151645	-0.00584	0.04634	-0.03438	0.01399	-0.01801	0.02403
64129	OX382161.1	2173795	0.10923	0.04976	0.02003	0.01706	0.01786	0.02832
64142	OX382161.1	2180023	-0.09375	0.05073	-0.10315	0.01794	-0.06876	0.02952
64154	OX382161.1	2185983	0.13669	0.05167	0.03069	0.01878	0.00028	0.03067
64156	OX382161.1	2186369	0.11111	0.05173	0.02703	0.01884	0.17460	0.03074
64195	OX382161.1	2205282	-0.02730	0.05453	-0.00912	0.02141	-0.01230	0.03418
64197	OX382161.1	2205315	0.06977	0.05453	0.01478	0.02141	-0.02031	0.03418
64202	OX382161.1	2207161	-0.06329	0.05498	-0.06126	0.02185	-0.06069	0.03469
64203	OX382161.1	2207164	0.06977	0.05498	0.01478	0.02185	0.05323	0.03469
64288	OX382161.1	2258280	0.02041	0.06313	0.02041	0.02972	0.06024	0.04428
64289	OX382161.1	2258283	0.16099	0.06313	0.11945	0.02972	0.18546	0.04428
64318	OX382161.1	2281665	0.32112	0.06668	0.29219	0.03321	0.33219	0.04819
64360	OX382161.1	2303326	0.10791	0.06980	0.11226	0.03635	0.14754	0.05151
64366	OX382161.1	2312171	0.10923	0.07106	0.02003	0.03767	0.01786	0.05282
64379	OX382161.1	2321040	-0.06910	0.07236	-0.06136	0.03905	-0.06364	0.05415
64385	OX382161.1	2322898	-0.09375	0.07266	-0.10315	0.03935	-0.06876	0.05446
64410	OX382161.1	2335300	-0.09375	0.07429	-0.10315	0.04117	-0.06876	0.05613
64440	OX382161.1	2355469	0.41305	0.07680	0.32919	0.04411	0.41104	0.05870
64451	OX382161.1	2356573	0.03309	0.07693	0.03522	0.04427	0.03574	0.05883
64485	OX382161.1	2376301	0.09091	0.07915	0.01786	0.04716	0.00325	0.06114
64510	OX382161.1	2386045	0.09091	0.08016	0.01786	0.04859	0.00325	0.06222
64524	OX382161.1	2394644	0.19826	0.08099	0.16269	0.04986	0.16023	0.06314
64559	OX382161.1	2418953	0.01642	0.08310	0.01604	0.05349	0.01476	0.06565
64605	OX382161.1	2452421	0.24153	0.08539	0.05988	0.05866	0.25000	0.06904
64690	OX382161.1	2487489	0.25969	0.08729	0.16350	0.06453	0.11946	0.07287
64736	OX382161.1	2514043	0.03309	0.08823	0.03522	0.06908	0.03574	0.07593
64759	OX382161.1	2524868	0.03309	0.08859	0.03522	0.07110	0.03574	0.07743
64765	OX382161.1	2526327	0.11111	0.08863	0.12903	0.07136	0.03460	0.07761
64827	OX382161.1	2562295	-0.07989	0.08979	-0.05769	0.07813	-0.05978	0.08265
64847	OX382161.1	2571855	0.15152	0.09013	0.13158	0.08003	0.11728	0.08418
64858	OX382161.1	2577816	0.10923	0.09038	0.02003	0.08117	0.01786	0.08508
64862	OX382161.1	2580930	-0.10414	0.09049	-0.11576	0.08179	0.01515	0.08559
64875	OX382161.1	2586966	0.12187	0.09073	0.13070	0.08302	0.01744	0.08660
64985	OX382161.1	2644880	-0.11111	0.09365	-0.12500	0.09551	-0.14337	0.09753
64986	OX382161.1	2644883	0.02152	0.09365	0.01281	0.09551	0.01064	0.09753
64991	OX382161.1	2648074	-0.09091	0.09383	-0.10000	0.09620	-0.07789	0.09817
65001	OX382161.1	2653865	-0.07280	0.09418	-0.07840	0.09745	-0.07866	0.09933
65008	OX382161.1	2656565	0.40269	0.09444	0.39250	0.09815	0.39117	0.10002
65075	OX382161.1	2687673	0.49029	0.09658	0.41161	0.10504	0.38924	0.10658
65078	OX382161.1	2689448	0.32320	0.09671	0.43195	0.10543	0.43254	0.10696
65091	OX382161.1	2693177	0.05214	0.09698	0.35614	0.10625	0.39789	0.10776
65095	OX382161.1	2695365	-0.09681	0.09714	-0.04296	0.10673	-0.02984	0.10823
65377	OX382162.1	134363	0.10923	0.06002	0.02003	0.01401	0.01786	0.02240
65382	OX382162.1	140834	0.04328	0.05939	0.00816	0.01368	0.00325	0.02230
65398	OX382162.1	149119	0.03309	0.05855	0.03522	0.01321	0.03574	0.02214
65470	OX382162.1	195086	0.10923	0.05282	0.02003	0.01006	0.01786	0.02053
65535	OX382162.1	224460	0.03522	0.04786	0.00331	0.00675	0.03883	0.01817
65621	OX382162.1	258697	0.13669	0.04156	0.03069	0.00294	0.00028	0.01510
65697	OX382162.1	330328	-0.07892	0.02562	-0.08578	-0.00795	0.04920	0.00469
65731	OX382162.1	340980	-0.09375	0.02307	-0.10315	-0.00986	-0.06876	0.00273
65732	OX382162.1	340983	0.22018	0.02307	0.17836	-0.00986	0.17816	0.00273
65777	OX382162.1	357855	0.07763	0.01906	0.06126	-0.01300	0.06350	-0.00055
65896	OX382162.1	436437	-0.11111	0.00423	-0.12500	-0.02653	-0.14337	-0.01489
65946	OX382162.1	470535	-0.06329	0.00146	-0.06126	-0.03081	-0.06069	-0.01909
65977	OX382162.1	487481	-0.07892	0.00135	-0.08578	-0.03215	-0.13043	-0.02017
65982	OX382162.1	490820	-0.07280	0.00143	-0.07840	-0.03234	-0.07866	-0.02029
66261	OX382162.1	653008	-0.03477	0.03942	-0.17397	-0.00777	-0.14593	0.01403
66295	OX382162.1	669714	-0.07869	0.04443	-0.28808	-0.00278	-0.19639	0.02010
66305	OX382162.1	675514	0.19217	0.04610	0.20351	-0.00105	0.20310	0.02218
66378	OX382162.1	713071	0.09898	0.05534	0.06471	0.00982	0.08012	0.03515
66452	OX382162.1	768166	0.24863	0.06425	0.18038	0.02359	0.23492	0.05116
66521	OX382162.1	809434	0.31173	0.06726	0.33530	0.03124	0.33219	0.06019
66525	OX382162.1	813114	-0.12676	0.06738	-0.14490	0.03181	-0.12821	0.06088
66560	OX382162.1	830901	-0.03120	0.06767	-0.03413	0.03429	-0.00455	0.06396
66595	OX382162.1	845146	-0.03030	0.06758	-0.03125	0.03598	-0.00156	0.06615
66761	OX382162.1	985424	0.02041	0.06241	0.00415	0.04801	0.08675	0.08340
66982	OX382162.1	1183979	0.22507	0.10101	0.24457	0.10442	0.27558	0.12791
67002	OX382162.1	1196258	-0.09091	0.10461	-0.10000	0.10847	-0.07789	0.13075
67147	OX382162.1	1325598	0.05091	0.12659	0.04995	0.14044	0.04741	0.15203
67162	OX382162.1	1333179	0.36185	0.12636	0.38218	0.14116	0.39009	0.15223
67360	OX382162.1	1625787	-0.06815	0.00100	-0.06136	0.04168	-0.06364	0.04296
67382	OX382162.1	1652844	0.06145	-0.00164	0.35139	0.03345	0.35000	0.03568
67410	OX382162.1	1665790	-0.09091	-0.00246	-0.10000	0.03021	-0.07789	0.03284
67466	OX382162.1	1707820	0.09419	-0.00299	0.08731	0.02074	0.04188	0.02505
67541	OX382162.1	1790959	-0.06329	0.00459	-0.06126	0.00658	-0.06069	0.01604
67544	OX382162.1	1791775	-0.09375	0.00474	-0.10315	0.00650	-0.06876	0.01602
67558	OX382162.1	1799568	0.23033	0.00628	0.09039	0.00574	0.07328	0.01587
67632	OX382162.1	1849580	-0.09091	0.01864	-0.10000	0.00249	-0.07789	0.01707
67722	OX382162.1	1916707	-0.08094	0.04090	-0.03261	0.00328	0.00028	0.02358
67928	OX382162.1	2044755	0.41796	0.06479	0.43117	0.00610	0.43194	0.02921
67983	OX382162.1	2080736	0.06250	0.06148	0.16923	0.00450	0.06726	0.02612
67985	OX382162.1	2080833	-0.08819	0.06147	-0.71939	0.00450	-0.53901	0.02611
67986	OX382162.1	2081219	0.20635	0.06141	0.20800	0.00447	0.33212	0.02607
68019	OX382162.1	2097768	0.00269	0.05856	0.01673	0.00334	0.01744	0.02403
68023	OX382162.1	2101539	0.15789	0.05780	0.06977	0.00305	0.11455	0.02353
68100	OX382162.1	2152651	0.10923	0.04414	0.02003	-0.00179	0.01786	0.01523
68106	OX382162.1	2161317	-0.07071	0.04136	-0.05769	-0.00274	-0.05769	0.01369
68159	OX382162.1	2191892	0.36508	0.03107	0.18699	-0.00604	0.15411	0.00812
68252	OX382162.1	2250251	-0.09091	0.01056	-0.07843	-0.01261	-0.05848	-0.00248
68262	OX382162.1	2252818	-0.09191	0.00967	-0.09496	-0.01290	-0.06364	-0.00294
68270	OX382162.1	2260910	-0.09091	0.00692	-0.10000	-0.01381	-0.07789	-0.00434
68325	OX382162.1	2291660	0.15455	-0.00303	0.25000	-0.01715	0.26875	-0.00934
68386	OX382162.1	2321218	-0.06329	-0.01153	-0.06126	-0.02010	-0.06069	-0.01353
68420	OX382162.1	2344853	-0.06329	-0.01750	-0.06126	-0.02228	-0.06069	-0.01643
68422	OX382162.1	2344888	-0.06329	-0.01751	-0.06126	-0.02228	-0.06069	-0.01644
68436	OX382162.1	2355623	0.01949	-0.01995	-0.00593	-0.02320	-0.00862	-0.01760
68444	OX382162.1	2357828	-0.07811	-0.02042	-0.06198	-0.02339	-0.06254	-0.01783
68499	OX382162.1	2402957	-0.02327	-0.02857	0.07553	-0.02665	-0.03540	-0.02157
68526	OX382162.1	2418744	-0.07280	-0.03072	-0.07840	-0.02757	-0.07866	-0.02247
68588	OX382162.1	2462748	-0.11111	-0.03492	-0.12500	-0.02952	-0.17857	-0.02400
68611	OX382162.1	2483707	-0.11111	-0.03610	-0.12500	-0.03013	0.02174	-0.02428
68639	OX382162.1	2496409	0.06977	-0.03690	0.07728	-0.03075	0.01920	-0.02466
68652	OX382162.1	2503761	-0.06329	-0.03707	-0.06126	-0.03084	-0.06069	-0.02461
68681	OX382162.1	2518414	-0.02186	-0.03725	0.04583	-0.03096	0.04241	-0.02445
68686	OX382162.1	2525536	-0.08444	-0.03728	-0.08650	-0.03100	0.01744	-0.02435
68729	OX382162.1	2553306	0.03309	-0.03728	0.03522	-0.03094	0.03574	-0.02388
68730	OX382162.1	2553309	-0.09091	-0.03728	-0.07843	-0.03094	-0.05848	-0.02388
68761	OX382162.1	2576743	-0.03030	-0.03653	-0.03125	-0.03077	-0.02143	-0.02328
68776	OX382162.1	2585349	-0.06329	-0.03617	-0.06126	-0.03066	-0.06069	-0.02303
68904	OX382162.1	2689215	0.06977	-0.02897	0.01478	-0.02801	0.00362	-0.01974
68978	OX382163.1	55559	0.10899	0.10929	0.12181	0.07882	0.10176	0.06921
69150	OX382163.1	225778	0.10923	0.10585	0.02003	0.04477	0.01786	0.04461
69241	OX382163.1	316502	0.11111	0.09185	0.02703	0.03042	0.05148	0.03037
69435	OX382163.1	544383	0.04642	-0.01306	0.05020	-0.01906	0.00510	-0.03123
69567	OX382163.1	656400	-0.07811	-0.02563	-0.06198	-0.02532	-0.06254	-0.03218
69667	OX382163.1	716691	-0.12676	-0.02307	-0.14490	-0.02199	-0.19380	-0.02561
69723	OX382163.1	757994	-0.09191	-0.01941	-0.09496	-0.01786	-0.06364	-0.01950
69732	OX382163.1	763875	-0.02564	-0.01882	-0.02857	-0.01718	-0.05814	-0.01856
69762	OX382163.1	793962	-0.09375	-0.01594	-0.10315	-0.01360	-0.06876	-0.01382
69794	OX382163.1	814508	0.31173	-0.01396	0.33530	-0.01113	0.33219	-0.01059
69810	OX382163.1	823242	-0.11111	-0.01309	-0.12500	-0.01001	-0.17857	-0.00919
69893	OX382163.1	872273	-0.06201	-0.00887	-0.05419	-0.00403	-0.01230	-0.00198
70051	OX382163.1	950906	-0.12676	-0.00596	-0.14490	0.00228	-0.12821	0.00502
70122	OX382163.1	1019064	0.01642	-0.00862	0.01604	0.00152	0.01476	0.00457
70149	OX382163.1	1031217	0.12727	-0.00948	0.13725	0.00083	0.15322	0.00395
70157	OX382163.1	1035807	0.11111	-0.00983	0.02703	0.00052	0.03140	0.00369
70195	OX382163.1	1063644	0.02312	-0.01224	0.20339	-0.00184	0.22367	0.00168
70222	OX382163.1	1086750	-0.09039	-0.01440	-0.08548	-0.00424	-0.12755	-0.00017
70280	OX382163.1	1133074	-0.09091	-0.01881	-0.10000	-0.00997	-0.07789	-0.00389
70283	OX382163.1	1133562	-0.11111	-0.01885	-0.11429	-0.01003	-0.16667	-0.00392
70293	OX382163.1	1136142	0.12727	-0.01909	0.13725	-0.01038	0.15322	-0.00412
70313	OX382163.1	1143858	-0.02268	-0.01980	-0.05890	-0.01143	-0.05814	-0.00467
70319	OX382163.1	1146660	-0.04337	-0.02006	0.01673	-0.01181	0.01744	-0.00487
70404	OX382163.1	1230884	-0.11111	-0.02597	-0.05517	-0.02367	-0.10000	-0.00798
70407	OX382163.1	1231710	-0.06329	-0.02602	-0.06126	-0.02379	-0.06069	-0.00798
70425	OX382163.1	1245905	-0.09091	-0.02642	-0.10000	-0.02569	-0.07789	-0.00778
70438	OX382163.1	1255993	-0.04545	-0.02677	-0.05769	-0.02712	-0.05978	-0.00761
70472	OX382163.1	1280949	-0.03120	-0.02753	-0.03413	-0.03079	-0.00455	-0.00692
70563	OX382163.1	1346719	0.01642	-0.02709	0.01604	-0.03948	0.01476	-0.00274
70585	OX382163.1	1362775	0.09289	-0.02676	0.07436	-0.04164	0.21140	-0.00162
70752	OX382163.1	1428478	-0.02593	-0.02409	-0.00230	-0.04946	0.00418	0.00271
70760	OX382163.1	1432444	0.01642	-0.02387	0.01604	-0.04987	0.01476	0.00289
70777	OX382163.1	1442143	-0.13043	-0.02328	-0.46512	-0.05082	0.09836	0.00330
70876	OX382163.1	1513070	-0.11628	-0.01725	-0.13089	-0.05353	-0.17998	0.00379
71026	OX382163.1	1688914	0.21311	0.00405	0.05677	-0.01644	0.10959	0.00991
71105	OX382163.1	1753912	0.06958	0.00759	0.04583	-0.00206	0.04241	0.01771
71124	OX382163.1	1765734	-0.06329	0.00844	-0.06126	0.00042	-0.06069	0.01953
71197	OX382163.1	1808505	-0.09375	0.01298	-0.10315	0.00996	-0.06876	0.02762
71223	OX382163.1	1825188	-0.08032	0.01541	-0.02553	0.01409	0.05461	0.03142
71284	OX382163.1	1870623	0.01642	0.02351	0.01604	0.02566	0.01476	0.04303
71318	OX382163.1	1898695	0.01642	0.02975	0.01604	0.03376	0.01476	0.05142
71331	OX382163.1	1901886	-0.07811	0.03049	-0.06198	0.03464	-0.06254	0.05238
71384	OX382163.1	1926984	-0.06329	0.03726	-0.06126	0.04241	-0.06069	0.06080
71396	OX382163.1	1931755	-0.07811	0.03850	-0.06198	0.04381	-0.06254	0.06235
71397	OX382163.1	1931758	0.03309	0.03850	0.03522	0.04381	0.03574	0.06235
71411	OX382163.1	1938135	0.03749	0.04014	0.02430	0.04557	0.02407	0.06429
71504	OX382163.1	1991158	0.15916	0.05406	0.03327	0.06053	0.08333	0.08095
71562	OX382163.1	2020098	0.36932	0.06116	0.71795	0.06773	0.73070	0.08902
71656	OX382163.1	2070571	0.24153	0.07090	0.05988	0.07725	0.25000	0.09971
71679	OX382163.1	2081947	0.23575	0.07256	0.22452	0.07880	0.22637	0.10144
71724	OX382163.1	2116404	-0.03030	0.07625	-0.03125	0.08204	-0.02143	0.10497
71732	OX382163.1	2117804	-0.04144	0.07635	-0.02389	0.08213	-0.02251	0.10506
71789	OX382163.1	2147917	0.03382	0.07786	0.00690	0.08319	0.04188	0.10605
71865	OX382163.1	2186770	0.03309	0.07813	0.03522	0.08253	0.03574	0.10501
71943	OX382163.1	2233920	0.10923	0.07658	0.02003	0.07940	0.01786	0.10116
71968	OX382163.1	2250496	0.22519	0.07564	0.33530	0.07775	0.33219	0.09919
71972	OX382163.1	2251827	-0.11628	0.07556	-0.13089	0.07760	-0.08686	0.09902
72007	OX382163.1	2264256	0.26364	0.07484	0.36538	0.07630	0.39407	0.09747
72024	OX382163.1	2267714	-0.08387	0.07459	-0.09150	0.07588	-0.09160	0.09698
72101	OX382163.1	2319461	-0.11628	0.07033	-0.13089	0.06857	-0.08686	0.08865
72107	OX382163.1	2322263	0.07763	0.07009	0.06126	0.06815	0.06350	0.08819
72108	OX382163.1	2322266	0.06977	0.07009	0.25540	0.06815	0.37988	0.08819
72139	OX382163.1	2340613	-0.09375	0.06824	-0.10315	0.06504	-0.06876	0.08471
72166	OX382163.1	2353539	0.67379	0.06697	0.63252	0.06283	0.63380	0.08226
72252	OX382163.1	2386198	0.10923	0.06323	0.02003	0.05660	0.01786	0.07539
72257	OX382163.1	2387172	-0.09191	0.06311	-0.09496	0.05640	-0.06364	0.07516
72307	OX382163.1	2406493	0.01907	0.06050	0.00194	0.05229	-0.02812	0.07065
72350	OX382163.1	2428236	0.03522	0.05738	0.00331	0.04746	0.03883	0.06535
72362	OX382163.1	2430886	-0.09375	0.05699	-0.10315	0.04685	-0.06876	0.06469
72411	OX382163.1	2461065	0.13669	0.05226	0.03069	0.03984	0.00028	0.05701
72470	OX382163.1	2494152	-0.03957	0.04659	-0.05313	0.03147	-0.05368	0.04797
72532	OX382163.1	2517661	-0.09375	0.04255	-0.10315	0.02585	-0.06876	0.04189
72643	OX382164.1	30524	0.06061	0.04513	0.08333	0.03962	0.10176	0.07083
72664	OX382164.1	43981	-0.10682	0.04668	-0.27905	0.04181	0.02555	0.07254
72699	OX382164.1	62835	-0.05263	0.04893	-0.03687	0.04464	0.04737	0.07479
72709	OX382164.1	65388	-0.09091	0.04925	-0.10000	0.04502	-0.07789	0.07510
72725	OX382164.1	70861	-0.01688	0.04984	-0.00293	0.04578	0.00000	0.07570
72729	OX382164.1	71542	-0.09091	0.04992	-0.10000	0.04588	-0.07789	0.07579
72778	OX382164.1	89604	0.23575	0.05219	0.22452	0.04858	0.22637	0.07805
72803	OX382164.1	104530	0.50000	0.05412	0.37931	0.05080	0.26034	0.07998
72842	OX382164.1	123267	0.19217	0.05660	0.20351	0.05356	0.20310	0.08245
72846	OX382164.1	123561	0.09877	0.05664	0.00308	0.05360	-0.03962	0.08249
72853	OX382164.1	125635	-0.07811	0.05691	-0.06198	0.05390	-0.06254	0.08277
72859	OX382164.1	127309	-0.11111	0.05704	-0.12500	0.05406	-0.14337	0.08289
72865	OX382164.1	128491	-0.05263	0.05719	0.00990	0.05423	0.04241	0.08304
72911	OX382164.1	162034	0.11017	0.06165	0.28305	0.05887	0.30130	0.08740
72994	OX382164.1	198125	-0.05685	0.06583	0.18182	0.06300	0.45000	0.09157
73082	OX382164.1	270047	0.10923	0.07096	0.02003	0.06781	0.01786	0.09695
73083	OX382164.1	270050	0.10923	0.07096	0.02003	0.06781	0.01786	0.09695
73084	OX382164.1	270372	-0.01235	0.07096	-0.12500	0.06781	-0.22460	0.09696
73145	OX382164.1	304240	0.47712	0.07064	0.50345	0.06785	0.55577	0.09712
73213	OX382164.1	337395	0.27012	0.06844	0.25778	0.06649	0.37701	0.09549
73264	OX382164.1	370994	-0.07280	0.06459	-0.07840	0.06394	-0.07866	0.09209
73294	OX382164.1	389849	-0.10414	0.06169	-0.11576	0.06188	-0.10000	0.08920
73315	OX382164.1	400099	0.24153	0.06021	0.05988	0.06076	0.25000	0.08765
73365	OX382164.1	442081	-0.07811	0.05353	-0.06198	0.05567	-0.06254	0.07993
73366	OX382164.1	442084	0.03522	0.05353	0.00331	0.05567	0.03883	0.07993
73398	OX382164.1	459049	0.05023	0.05091	0.00498	0.05348	0.06414	0.07644
73399	OX382164.1	459064	0.21212	0.05091	0.36538	0.05347	0.36413	0.07643
73432	OX382164.1	477293	-0.09191	0.04827	-0.09496	0.05107	-0.06364	0.07253
73437	OX382164.1	480981	0.04560	0.04775	0.27105	0.05056	0.27041	0.07171
73498	OX382164.1	519840	-0.07248	0.04328	-0.04555	0.04562	-0.03215	0.06320
73536	OX382164.1	576590	-0.07811	0.03856	-0.06198	0.03760	-0.06254	0.05054
73593	OX382164.1	611090	0.22764	0.03740	0.14737	0.03293	0.08049	0.04346
73594	OX382164.1	611745	-0.09375	0.03739	-0.10315	0.03284	-0.06876	0.04333
73595	OX382164.1	611748	0.19217	0.03739	0.20351	0.03284	0.20310	0.04333
73642	OX382164.1	638557	-0.06329	0.03682	-0.06126	0.02888	-0.06069	0.03799
73645	OX382164.1	639395	-0.06655	0.03681	-0.06136	0.02876	-0.06364	0.03784
73692	OX382164.1	668958	0.27273	0.03656	0.12000	0.02430	0.08675	0.03236
73758	OX382164.1	703029	0.03309	0.03628	0.03522	0.01893	0.03574	0.02689
73932	OX382164.1	832072	-0.08387	0.03023	-0.09150	-0.00510	-0.09160	0.01017
73935	OX382164.1	832377	-0.11111	0.03020	-0.12500	-0.00515	-0.17857	0.01014
73965	OX382164.1	847165	0.24153	0.02906	0.05988	-0.00773	0.25000	0.00879
74170	OX382164.1	1015514	-0.01299	0.00620	-0.00833	-0.02596	-0.01549	-0.00426
74315	OX382164.1	1165333	-0.09375	0.00545	-0.10315	-0.02241	-0.06876	-0.00380
74383	OX382164.1	1199110	0.02778	0.00734	0.02349	-0.02141	0.02407	-0.00301
74493	OX382164.1	1263407	-0.06068	0.01066	-0.04316	-0.01967	0.02626	-0.00161
74506	OX382164.1	1268991	0.10923	0.01086	0.02003	-0.01956	0.01786	-0.00154
74550	OX382164.1	1290295	0.10923	0.01194	0.02003	-0.01901	0.01786	-0.00107
74675	OX382164.1	1385388	-0.09091	0.01575	-0.07843	-0.01439	-0.05848	0.00102
74926	OX382164.1	1634901	0.01335	0.04963	0.00113	-0.00246	0.00000	0.01973
75025	OX382164.1	1686329	0.17768	0.04908	0.17768	-0.01336	0.17816	0.01770
75051	OX382164.1	1699067	0.09091	0.04876	0.01786	-0.01621	0.00325	0.01739
75069	OX382164.1	1710038	0.07763	0.04841	0.06126	-0.01896	0.06350	0.01692
75110	OX382164.1	1734420	0.02081	0.04751	-0.09627	-0.02532	-0.09342	0.01592
75138	OX382164.1	1753017	0.17768	0.04667	0.17768	-0.03028	0.17816	0.01528
75155	OX382164.1	1763137	-0.09091	0.04623	-0.10000	-0.03294	-0.07789	0.01500
75187	OX382164.1	1779313	-0.09191	0.04550	-0.09496	-0.03711	-0.06364	0.01467
75316	OX382164.1	1880474	0.17768	0.04166	0.17768	-0.05519	0.17816	0.01806
75338	OX382164.1	1892682	-0.11111	0.04142	-0.12500	-0.05536	-0.17857	0.01959
75347	OX382164.1	1896759	0.07258	0.04131	-0.97561	-0.05546	-0.30000	0.02004
75351	OX382164.1	1897620	-0.11111	0.04129	-0.12500	-0.05548	-0.17857	0.02014
75396	OX382164.1	1928605	0.21311	0.04072	0.05677	-0.05446	0.25000	0.02423
75399	OX382164.1	1929816	0.21311	0.04070	0.05677	-0.05436	0.25000	0.02441
75448	OX382164.1	1966673	-0.08517	0.04082	0.01878	-0.04887	0.03460	0.03057
75501	OX382164.1	2006699	-0.06329	0.04222	-0.06126	-0.03804	-0.06069	0.03871
75564	OX382164.1	2045631	0.24153	0.04535	0.05988	-0.02363	0.25000	0.04724
75595	OX382164.1	2059297	-0.06993	0.04691	-0.08333	-0.01798	-0.05625	0.05022
75670	OX382164.1	2095591	-0.09091	0.05217	-0.03623	-0.00247	-0.02031	0.05765
75750	OX382164.1	2140121	0.08442	0.06004	0.22436	0.01530	0.25942	0.06475
75913	OX382164.1	2265831	0.09091	0.08104	0.01786	0.04500	0.00325	0.07208
75928	OX382164.1	2271691	0.21311	0.08171	0.05677	0.04563	0.19863	0.07205
75934	OX382164.1	2275261	0.21311	0.08211	0.05677	0.04599	0.25000	0.07202
75935	OX382164.1	2275264	0.09091	0.08211	0.01786	0.04599	0.00325	0.07202
75961	OX382164.1	2286006	0.09774	0.08324	0.01770	0.04697	-0.01260	0.07191
75974	OX382164.1	2292531	-0.09681	0.08389	-0.04296	0.04750	-0.07888	0.07181
75997	OX382164.1	2320428	0.08046	0.08631	0.07300	0.04925	-0.01813	0.07124
76024	OX382164.1	2331964	-0.02273	0.08708	-0.04762	0.04966	-0.06122	0.07085
76040	OX382164.1	2337758	0.16530	0.08749	0.47325	0.04989	0.51730	0.07070
76043	OX382164.1	2337975	0.15916	0.08751	0.03327	0.04990	0.08333	0.07070
76118	OX382164.1	2380849	0.02253	0.08996	-0.08650	0.05158	-0.13750	0.06950
76188	OX382164.1	2413707	0.15916	0.09140	0.03327	0.05156	0.08333	0.06837
76300	OX382165.1	51267	0.24437	0.01767	0.40941	0.03580	0.27698	0.02004
76330	OX382165.1	76254	-0.05263	0.01616	-0.03687	0.03150	-0.07817	0.01837
76337	OX382165.1	82175	-0.11628	0.01585	-0.13089	0.03053	-0.11429	0.01803
76345	OX382165.1	85723	0.21311	0.01567	0.38344	0.02996	0.36066	0.01783
76381	OX382165.1	104998	0.09300	0.01478	0.00544	0.02691	-0.09808	0.01686
76386	OX382165.1	105215	-0.07811	0.01477	-0.06198	0.02688	-0.06254	0.01685
76452	OX382165.1	152445	-0.09375	0.01304	-0.10315	0.01980	-0.06876	0.01506
76497	OX382165.1	183857	-0.07811	0.01274	-0.06198	0.01565	-0.06254	0.01440
76528	OX382165.1	205244	0.10380	0.01315	0.00670	0.01352	0.01920	0.01456
76543	OX382165.1	209642	0.02778	0.01321	0.02349	0.01306	0.02407	0.01456
76564	OX382165.1	222088	0.01642	0.01344	0.01604	0.01179	0.01476	0.01461
76626	OX382165.1	274927	-0.12676	0.01610	-0.14490	0.00799	0.07042	0.01570
76645	OX382165.1	299616	0.20635	0.01821	0.20800	0.00706	0.13776	0.01654
76740	OX382165.1	395724	-0.09375	0.03259	-0.10315	0.01034	-0.06876	0.02178
76836	OX382165.1	467800	-0.09375	0.04972	-0.10315	0.02126	-0.06876	0.02915
76837	OX382165.1	467803	-0.09375	0.04972	-0.10315	0.02126	-0.06876	0.02915
76841	OX382165.1	473144	0.47020	0.05115	0.30736	0.02233	0.19984	0.02984
76843	OX382165.1	474976	0.10791	0.05165	0.11226	0.02271	0.14754	0.03008
76906	OX382165.1	519828	-0.11111	0.06416	-0.12500	0.03266	-0.09272	0.03649
76955	OX382165.1	581855	-0.09375	0.08322	-0.10315	0.04953	-0.06876	0.04744
76981	OX382165.1	604079	0.06977	0.08981	0.01478	0.05562	0.00362	0.05130
76992	OX382165.1	611186	0.21311	0.09176	0.05677	0.05745	0.02543	0.05243
77039	OX382165.1	644145	0.47712	0.10054	0.50345	0.06560	0.43254	0.05736
77171	OX382165.1	713297	0.29515	0.11362	0.30876	0.07784	0.26230	0.06333
77229	OX382165.1	751420	-0.09375	0.11684	-0.10315	0.08056	-0.06876	0.06308
77282	OX382165.1	793801	0.11111	0.11679	0.02703	0.08035	-0.03215	0.06045
77440	OX382165.1	879382	0.09091	0.10295	0.01786	0.07086	0.00325	0.05033
77571	OX382165.1	972255	-0.02564	0.06976	-0.02857	0.05051	-0.08333	0.03648
77572	OX382165.1	972258	0.55556	0.06975	0.45455	0.05051	0.40686	0.03648
77597	OX382165.1	985201	0.02778	0.06402	0.02349	0.04704	0.02407	0.03449
77623	OX382165.1	1005017	0.06977	0.05512	0.01478	0.04164	-0.02031	0.03153
77756	OX382165.1	1110084	-0.04670	0.01379	0.03084	0.01649	0.02626	0.02027
77785	OX382165.1	1132589	0.02778	0.00822	0.02349	0.01313	0.02407	0.01943
77851	OX382165.1	1186165	-0.06329	-0.00057	-0.06126	0.00795	-0.06069	0.01919
77866	OX382165.1	1194008	-0.08387	-0.00128	-0.09150	0.00757	-0.09160	0.01937
77901	OX382165.1	1206418	-0.09091	-0.00209	-0.10000	0.00718	-0.07789	0.01978
77974	OX382165.1	1249197	-0.07811	-0.00341	-0.06198	0.00620	-0.06254	0.02088
77985	OX382165.1	1256346	-0.03733	-0.00325	-0.00401	0.00620	0.00679	0.02106
78016	OX382165.1	1279785	-0.09191	-0.00267	-0.09496	0.00628	-0.06364	0.02159
78020	OX382165.1	1281594	-0.11628	-0.00252	-0.13089	0.00630	0.08333	0.02162
78025	OX382165.1	1282876	-0.07811	-0.00239	-0.06198	0.00629	-0.06254	0.02160
78040	OX382165.1	1288985	0.24578	-0.00213	0.40614	0.00633	0.40848	0.02168
78049	OX382165.1	1297853	0.12727	-0.00170	0.13725	0.00638	0.15322	0.02174
78161	OX382165.1	1365596	0.19826	0.00220	0.16269	0.00524	0.16023	0.01884
78165	OX382165.1	1366899	-0.01677	0.00229	-0.08657	0.00518	-0.08713	0.01872
78266	OX382165.1	1414360	-0.07280	0.00529	-0.07840	0.00186	-0.07866	0.01233
78407	OX382165.1	1508652	-0.08151	0.00840	-0.02962	-0.01223	-0.02997	-0.00922
78466	OX382165.1	1564514	0.18089	0.00906	0.05232	-0.01910	-0.01230	-0.01882
78513	OX382165.1	1601409	-0.01617	0.00954	-0.00159	-0.02117	-0.03413	-0.02168
78673	OX382165.1	1656723	-0.09091	0.01239	-0.10000	-0.01769	-0.07789	-0.01831
78683	OX382165.1	1663099	0.10923	0.01272	0.02003	-0.01692	0.01786	-0.01750
78699	OX382165.1	1675242	-0.09375	0.01334	-0.10315	-0.01516	-0.06876	-0.01567
78722	OX382165.1	1682044	-0.03915	0.01394	-0.12010	-0.01305	-0.10141	-0.01347
78758	OX382165.1	1702703	0.13669	0.01566	0.03069	-0.00831	0.00672	-0.00854
78812	OX382165.1	1731286	0.10923	0.01880	0.02003	0.00049	0.01786	0.00051
78819	OX382165.1	1732576	-0.03030	0.01903	-0.03125	0.00101	-0.02143	0.00094
78820	OX382165.1	1732845	0.10923	0.01906	0.02003	0.00111	0.01786	0.00104
78850	OX382165.1	1757114	-0.09375	0.02221	-0.10315	0.01040	-0.06876	0.01062
78856	OX382165.1	1759704	-0.07811	0.02261	-0.06198	0.01154	-0.06254	0.01179
78891	OX382165.1	1775104	-0.11111	0.02516	-0.12500	0.01873	-0.17857	0.01916
78951	OX382165.1	1834138	0.06977	0.03736	0.01478	0.05117	0.05323	0.05216
78955	OX382165.1	1834905	0.11111	0.03754	0.02703	0.05163	-0.03215	0.05263
79013	OX382165.1	1874470	-0.01201	0.04716	-0.00912	0.07520	-0.01230	0.07652
79111	OX382165.1	1928715	0.10791	0.05953	0.11226	0.10320	0.14754	0.10480
79183	OX382165.1	1973479	0.03743	0.06760	100000	0.11892	100000	0.12056
79242	OX382165.1	1999000	0.10923	0.07085	0.02003	0.12423	0.01786	0.12581
79243	OX382165.1	1999003	0.07763	0.07085	0.06126	0.12423	0.06350	0.12581
79268	OX382165.1	2006386	-0.08387	0.07160	-0.09150	0.12526	-0.09160	0.12682
79273	OX382165.1	2008267	0.02778	0.07178	0.02349	0.12549	0.02407	0.12704
79274	OX382165.1	2008270	-0.09375	0.07178	-0.10315	0.12549	-0.06876	0.12704
79299	OX382165.1	2014920	0.00677	0.07232	0.07834	0.12621	0.03532	0.12775
79320	OX382165.1	2020506	0.03309	0.07276	0.03522	0.12665	0.03574	0.12816
79347	OX382165.1	2032742	0.02152	0.07353	0.01281	0.12718	0.01064	0.12862
79373	OX382165.1	2041900	0.19217	0.07395	0.20351	0.12721	0.20310	0.12858
79397	OX382165.1	2058395	-0.09091	0.07440	-0.10000	0.12652	-0.07789	0.12778
79405	OX382165.1	2061914	100000	0.07443	100000	0.12624	100000	0.12747
79499	OX382165.1	2114629	-0.08151	0.07275	-0.02962	0.11743	-0.02997	0.11818
79541	OX382165.1	2128145	0.00474	0.07176	100000	0.11397	100000	0.11458
79544	OX382165.1	2129839	-0.09375	0.07161	-0.10315	0.11349	-0.06876	0.11409
79550	OX382165.1	2130887	0.02902	0.07152	0.04011	0.11319	0.07143	0.11378
79555	OX382165.1	2131716	0.34066	0.07144	0.29745	0.11296	0.28141	0.11354
79645	OX382165.1	2180869	0.05742	0.06570	0.03408	0.09672	0.00526	0.09693
79647	OX382165.1	2180886	0.10923	0.06570	0.02003	0.09671	0.01786	0.09692
79651	OX382165.1	2181011	0.01642	0.06568	0.01604	0.09666	0.01476	0.09687
79768	OX382165.1	2243627	0.00480	0.05591	-0.03438	0.07244	-0.07789	0.07246
79770	OX382165.1	2244834	0.13447	0.05570	0.26154	0.07196	0.26230	0.07198
79778	OX382165.1	2246347	-0.12676	0.05544	-0.14490	0.07135	-0.19380	0.07137
79779	OX382165.1	2246350	0.09423	0.05544	-0.27959	0.07135	-0.28251	0.07137
79788	OX382165.1	2248042	0.10923	0.05514	0.02003	0.07067	0.01786	0.07069
79793	OX382165.1	2249033	-0.09375	0.05497	-0.10315	0.07027	-0.06876	0.07030
79805	OX382165.1	2253313	0.17008	0.05422	0.25149	0.06856	0.22842	0.06859
79888	OX382165.1	2295720	0.15152	0.04663	0.13158	0.05213	0.13158	0.05235
79906	OX382165.1	2311076	-0.09091	0.04389	-0.10000	0.04649	-0.07789	0.04683
79953	OX382165.1	2329468	0.01642	0.04069	0.01604	0.04007	0.01476	0.04060
79972	OX382165.1	2341405	-0.09091	0.03861	-0.10000	0.03608	-0.07789	0.03675
80058	OX382165.1	2391537	0.10923	0.03021	0.02003	0.02114	0.01786	0.02252
80097	OX382165.1	2411229	-0.03973	0.02714	-0.00293	0.01615	0.02500	0.01788
80102	OX382165.1	2412632	-0.06815	0.02693	-0.06136	0.01582	-0.06364	0.01757
80365	OX382166.1	61576	-0.09091	0.02506	-0.10000	0.02508	-0.07789	0.02433
80370	OX382166.1	64086	-0.07892	0.02602	-0.08578	0.02589	-0.13043	0.02517
80510	OX382166.1	166578	0.11447	0.06674	0.25489	0.05901	0.30447	0.05890
80561	OX382166.1	191994	0.16143	0.07657	0.14286	0.06661	0.04241	0.06655
80564	OX382166.1	193701	-0.09375	0.07721	-0.10315	0.06711	-0.06876	0.06705
80591	OX382166.1	202767	-0.05793	0.08059	-0.07711	0.06968	-0.06122	0.06962
80655	OX382166.1	241151	-0.05882	0.09348	-0.10000	0.07937	-0.08745	0.07932
80666	OX382166.1	242659	0.04382	0.09395	0.01008	0.07971	-0.01549	0.07966
80739	OX382166.1	290029	0.19217	0.10643	0.20351	0.08861	0.20310	0.08856
80859	OX382166.1	347170	0.63636	0.11470	0.56000	0.09370	0.58730	0.09359
80868	OX382166.1	352914	0.47598	0.11505	0.38525	0.09382	0.34726	0.09372
80887	OX382166.1	361670	0.06977	0.11541	0.01478	0.09386	0.05323	0.09377
80924	OX382166.1	382498	-0.11111	0.11537	-0.12500	0.09325	-0.14337	0.09325
80940	OX382166.1	387353	-0.07280	0.11518	-0.07840	0.09296	-0.07866	0.09299
80948	OX382166.1	393819	0.23575	0.11482	0.22452	0.09250	0.22637	0.09257
80957	OX382166.1	400121	-0.02949	0.11435	-0.00240	0.09194	-0.00455	0.09208
81081	OX382166.1	435380	0.23575	0.10909	0.22452	0.08667	0.22637	0.08762
81129	OX382166.1	462761	0.10923	0.10244	0.02003	0.08062	0.01786	0.08253
81220	OX382166.1	535851	-0.11111	0.07450	-0.12500	0.05652	-0.17857	0.06397
81235	OX382166.1	543608	0.19826	0.07078	0.16269	0.05337	0.16023	0.06171
81297	OX382166.1	587677	-0.06329	0.04789	-0.06126	0.03426	-0.06069	0.04880
81396	OX382166.1	665541	-0.04058	0.01066	0.02213	0.00300	0.07486	0.03074
81412	OX382166.1	674879	-0.06815	0.00711	-0.06136	0.00001	-0.06364	0.02914
81483	OX382166.1	738119	-0.10891	-0.00939	-0.12112	-0.01416	0.09206	0.02135
81637	OX382166.1	855507	0.24153	-0.01548	0.05988	-0.01880	0.25000	0.01344
81655	OX382166.1	863122	0.07640	-0.01529	0.16418	-0.01851	0.16374	0.01309
81657	OX382166.1	866599	-0.09091	-0.01520	-0.10000	-0.01838	-0.07789	0.01293
81669	OX382166.1	871618	-0.11628	-0.01508	-0.13089	-0.01819	-0.17998	0.01270
81680	OX382166.1	880326	-0.09091	-0.01487	-0.10000	-0.01785	-0.07789	0.01229
81720	OX382166.1	899444	-0.02730	-0.01464	-0.00912	-0.01730	-0.01230	0.01120
81788	OX382166.1	941369	-0.09091	-0.01420	-0.10000	-0.01608	-0.07789	0.00891
81822	OX382166.1	961681	0.03309	-0.01425	0.03522	-0.01578	0.03574	0.00764
81881	OX382166.1	1000178	-0.01740	-0.01531	0.00990	-0.01623	0.04241	0.00474
81886	OX382166.1	1003983	-0.08151	-0.01547	-0.02962	-0.01634	-0.02997	0.00442
81967	OX382166.1	1065366	0.19826	-0.01999	0.16269	-0.02049	0.16023	-0.00187
82063	OX382166.1	1136453	-0.11628	-0.02847	-0.13089	-0.02980	-0.11429	-0.01052
82163	OX382166.1	1199759	-0.06201	-0.03641	-0.05419	-0.03934	-0.01230	-0.01743
82184	OX382166.1	1212770	-0.11111	-0.03735	-0.12500	-0.04071	-0.17857	-0.01799
82190	OX382166.1	1216670	-0.04132	-0.03760	-0.03125	-0.04110	-0.02143	-0.01818
82239	OX382166.1	1270220	-0.01010	-0.03708	-0.00800	-0.04301	-0.05769	-0.01748
82273	OX382166.1	1290089	-0.10891	-0.03468	-0.12112	-0.04175	0.09206	-0.01576
82355	OX382166.1	1352148	-0.09375	-0.01836	-0.10315	-0.02987	-0.06876	-0.00482
82549	OX382166.1	1538391	0.06977	0.03631	0.01478	0.01345	-0.02031	0.03775
82550	OX382166.1	1538394	0.10791	0.03631	0.11226	0.01345	0.14754	0.03775
82558	OX382166.1	1540783	0.39241	0.03634	0.30097	0.01341	0.22101	0.03801
82624	OX382166.1	1604061	-0.12676	0.03135	-0.14490	0.00589	-0.14783	0.04173
82630	OX382166.1	1604807	-0.01010	0.03123	-0.00800	0.00573	-0.05769	0.04173
82653	OX382166.1	1617991	-0.11628	0.02899	-0.13089	0.00270	-0.11429	0.04163
82708	OX382166.1	1662440	0.12187	0.01998	0.13070	-0.00993	0.25949	0.03976
82735	OX382166.1	1682404	0.04050	0.01602	0.02940	-0.01610	0.18532	0.03845
82931	OX382166.1	1823397	-0.09375	0.00625	-0.10315	-0.04612	-0.06876	0.02365
82932	OX382166.1	1823844	-0.11111	0.00628	-0.12500	-0.04614	0.02174	0.02361
82968	OX382166.1	1866243	-0.10092	0.01084	-0.11214	-0.04617	0.03509	0.02057
82997	OX382166.1	1889692	0.27302	0.01419	0.32561	-0.04463	0.34802	0.01945
83017	OX382166.1	1898839	-0.09424	0.01559	-0.17710	-0.04379	0.03378	0.01912
83039	OX382166.1	1907792	-0.10320	0.01700	-0.45455	-0.04285	-0.15456	0.01884
83053	OX382166.1	1915831	-0.09375	0.01827	-0.10315	-0.04192	-0.06876	0.01864
83069	OX382166.1	1930514	-0.11111	0.02062	-0.12500	-0.04004	-0.14337	0.01838
83091	OX382166.1	1957206	-0.06993	0.02490	-0.33333	-0.03596	-0.33178	0.01825
83114	OX382166.1	1979587	0.07763	0.02823	0.06126	-0.03228	0.06350	0.01836
83125	OX382166.1	1986432	0.35537	0.02918	0.35833	-0.03111	0.35378	0.01844
83195	OX382166.1	2030045	0.50515	0.03419	0.31210	-0.02361	0.26415	0.01918
83210	OX382166.1	2038005	-0.09375	0.03495	-0.10315	-0.02217	-0.06876	0.01941
83260	OX382166.1	2063961	0.06977	0.03702	0.01478	-0.01752	-0.02031	0.02036
83281	OX382166.1	2075299	-0.09091	0.03769	-0.10000	-0.01550	-0.07789	0.02081
83338	OX382166.1	2113466	0.01235	0.03824	0.00572	-0.00939	0.04168	0.02193
83421	OX382166.1	2222068	-0.04523	0.03221	-0.00435	0.00664	0.09779	0.02706
83510	OX382166.1	2258053	-0.01617	0.02966	-0.00159	0.01218	-0.03413	0.02928
83666	OX382166.1	2380838	0.12187	0.03403	0.13070	0.03927	0.08333	0.04043
83724	OX382167.1	32356	-0.06329	-0.00490	-0.06126	-0.04122	-0.06069	-0.02720
83898	OX382167.1	124244	0.23575	-0.00358	0.22452	-0.04729	0.22637	-0.02982
83920	OX382167.1	135515	-0.09091	-0.00309	-0.07843	-0.04755	-0.05848	-0.02969
83939	OX382167.1	145912	-0.08387	-0.00280	-0.09150	-0.04793	-0.09160	-0.02972
83964	OX382167.1	156960	0.13669	-0.00245	0.03069	-0.04827	0.00028	-0.02967
83992	OX382167.1	179466	0.00000	-0.00142	0.00000	-0.04854	-0.00117	-0.02921
83997	OX382167.1	180376	-0.09375	-0.00137	-0.10315	-0.04854	-0.06876	-0.02918
84002	OX382167.1	182578	-0.09091	-0.00127	-0.10000	-0.04855	-0.07789	-0.02912
84086	OX382167.1	244602	-0.04341	0.00297	-0.57611	-0.04672	-0.41076	-0.02560
84087	OX382167.1	245221	-0.03120	0.00303	-0.03413	-0.04668	-0.00455	-0.02555
84099	OX382167.1	249282	-0.06329	0.00342	-0.06126	-0.04639	-0.06069	-0.02516
84142	OX382167.1	271025	-0.03030	0.00575	-0.03125	-0.04444	-0.02143	-0.02279
84148	OX382167.1	274574	0.11111	0.00619	0.02703	-0.04405	0.03140	-0.02234
84188	OX382167.1	299843	-0.06329	0.00963	-0.06126	-0.04070	-0.06069	-0.01866
84201	OX382167.1	309116	0.12727	0.01111	0.13725	-0.03920	0.15322	-0.01706
84282	OX382167.1	350666	0.01642	0.01892	0.01604	-0.03064	0.01476	-0.00835
84304	OX382167.1	361343	-0.06201	0.02122	-0.05419	-0.02793	-0.01230	-0.00572
84342	OX382167.1	388229	0.15916	0.02770	0.03327	-0.02028	0.08333	0.00162
84540	OX382167.1	545153	0.19826	0.05496	0.16269	0.02062	0.16023	0.03626
84577	OX382167.1	575722	0.23575	0.05197	0.22452	0.02064	0.22637	0.03481
84656	OX382167.1	624180	0.15916	0.04338	0.03327	0.01634	0.08333	0.02849
84665	OX382167.1	628926	0.02152	0.04234	0.01281	0.01567	0.01064	0.02763
84685	OX382167.1	641508	-0.09091	0.03951	-0.10000	0.01403	-0.07789	0.02538
84900	OX382167.1	717810	-0.06329	0.02275	-0.06126	0.00299	-0.06069	0.01177
84925	OX382167.1	734784	-0.06329	0.01989	-0.06126	0.00112	-0.06069	0.00941
84973	OX382167.1	760980	-0.09375	0.01634	-0.10315	-0.00098	-0.06876	0.00655
85029	OX382167.1	806028	-0.05733	0.01277	-0.03368	-0.00176	-0.03739	0.00479
85117	OX382167.1	861508	0.29870	0.01107	0.29902	0.00091	0.27155	0.00705
85151	OX382167.1	887805	-0.00294	0.01064	-0.05890	0.00302	-0.05814	0.00947
85152	OX382167.1	888637	0.02253	0.01062	-0.07009	0.00309	-0.02436	0.00955
85157	OX382167.1	894050	-0.11111	0.01051	-0.12500	0.00352	-0.14337	0.01009
85324	OX382167.1	1019889	0.07955	0.00504	0.08333	0.01076	0.04741	0.02284
85383	OX382167.1	1061586	0.19217	0.00294	0.20351	0.01167	0.20310	0.02600
85444	OX382167.1	1080580	0.02273	0.00224	0.16667	0.01209	0.16764	0.02731
85446	OX382167.1	1080639	-0.04337	0.00223	-0.02733	0.01209	-0.02945	0.02732
85457	OX382167.1	1084013	-0.11111	0.00219	-0.11429	0.01219	-0.16667	0.02757
85484	OX382167.1	1098609	-0.07248	0.00219	-0.04555	0.01277	-0.03215	0.02877
85496	OX382167.1	1109557	0.12187	0.00229	0.13070	0.01322	0.25949	0.02963
85497	OX382167.1	1109560	-0.09375	0.00229	-0.10315	0.01322	-0.06876	0.02963
85540	OX382167.1	1133965	-0.09191	0.00316	-0.09496	0.01459	-0.06364	0.03174
85575	OX382167.1	1154435	-0.10092	0.00475	-0.11214	0.01631	0.03509	0.03383
85641	OX382167.1	1188709	-0.02029	0.00926	-0.02277	0.02058	-0.05899	0.03826
85750	OX382167.1	1293806	-0.11628	0.03733	-0.13089	0.04398	-0.11429	0.05759
85772	OX382167.1	1305407	0.17768	0.04139	0.17768	0.04710	0.17816	0.05983
85814	OX382167.1	1336629	0.03030	0.05196	0.15385	0.05486	0.15217	0.06514
85856	OX382167.1	1380241	0.33333	0.06526	0.18182	0.06358	0.18532	0.07032
85880	OX382167.1	1406623	0.21311	0.07064	0.23132	0.06557	0.20314	0.07062
86042	OX382167.1	1529509	-0.09091	0.06821	-0.10000	0.04460	-0.10000	0.04729
86126	OX382167.1	1589870	0.07763	0.05972	0.06126	0.02866	0.06350	0.03399
86289	OX382167.1	1688787	0.01907	0.04975	0.00194	0.01506	-0.02812	0.02775
86290	OX382167.1	1689934	0.13669	0.04967	0.03069	0.01500	0.08333	0.02778
86370	OX382167.1	1738507	-0.01299	0.04645	-0.00833	0.01373	0.03140	0.03019
86381	OX382167.1	1744095	0.11111	0.04628	0.02703	0.01387	-0.03215	0.03072
86420	OX382167.1	1767028	0.04382	0.04507	0.01008	0.01407	-0.01549	0.03240
86443	OX382167.1	1781006	0.13669	0.04446	0.03069	0.01450	0.00028	0.03359
86559	OX382167.1	1850292	-0.11628	0.04243	-0.13089	0.01795	0.08333	0.03904
86612	OX382167.1	1882125	-0.09375	0.04237	-0.10315	0.01999	-0.06876	0.04097
86652	OX382167.1	1907066	0.27012	0.04281	0.25778	0.02173	0.37701	0.04217
[truncated: 142 more rows]
