# Supplementary material for: Sponge genomes reveal a pre-metazoan origin of the sex determination toolkit and sex chromosomes
Source: Research Square preprint supplement (doi:10.21203/rs.3.rs-8554461/v1), 2026-02-12
Supplement: Supplementary file 4 [file 2c68ef936f1600eaa0efd676.xlsx]

## Sheet: A. Chondrosia_reniformis
Chromosome	Gene	Blast	Function	Ref
Chromosome 11	Choren_v00_mik.OX359199.1G398.1	YIPF6_XENTRProtein YIPF6 OS=Xenopus tropicalis OX=8364 GN=yipf6 PE=2 SV=1	X-linked in humans	https://www.ncbi.nlm.nih.gov/pmc/articles/PMC3412000/
Chromosome 11	Choren_v00_mik.OX359199.1G403.1	PTPRD_MOUSEReceptor-type tyrosine-protein phosphatase delta OS=Mus musculus OX=10090 GN=Ptprd PE=1 SV=3	Candidate for temperature dependent sex determination in reptilians	https://www.ncbi.nlm.nih.gov/pmc/articles/PMC8273508/
Chromosome 11	Choren_v00_mik.OX359199.1G401.1	CP3A8_MACFACytochrome P450 3A8 OS=Macaca fascicularis OX=9541 GN=CYP3A8 PE=1 SV=1	sex-distinct patterns of DNA methylation. different methylation patterns partially explain the sex-based differences in expression of CYP family members and X-ist	https://www.ncbi.nlm.nih.gov/pmc/articles/PMC3898641/
Chromosome 11	Choren_v00_mik.OX359199.1G406.2	DPYS_MOUSEDihydropyrimidinase OS=Mus musculus OX=10090 GN=Dpys PE=1 SV=2	The dpy-30 gene encodes an essential component of the Caenorhabditis elegans dosage compensation machinery	https://pubmed.ncbi.nlm.nih.gov/7982580/
Chromosome 11	Choren_v00_mik.OX359199.1G412.1	CDK13_BOVINCyclin-dependent kinase 13 OS=Bos taurus OX=9913 GN=CDK13 PE=3 SV=1	Dosage-sensitive functions in embryonic development drove the survival of genes on sex-specific chromosomes in snakes, birds, and mammals	https://www.ncbi.nlm.nih.gov/pmc/articles/PMC7849413/
Chromosome 11	Choren_v00_mik.OX359199.1G410.1	VPS50_HUMANSyndetin OS=Homo sapiens OX=9606 GN=VPS50 PE=1 SV=3
Chromosome 11	Choren_v00_mik.OX359199.1G411.1	KIN15_CAEELReceptor-like tyrosine-protein kinase kin-15 OS=Caenorhabditis elegans OX=6239 GN=kin-15 PE=2 SV=1
Chromosome 11	Choren_v00_mik.OX359199.1G415.1	GARS_HUMANGlycine--tRNA ligase OS=Homo sapiens OX=9606 GN=GARS1 PE=1 SV=3
Chromosome 11	Choren_v00_mik.OX359199.1G417.1	GARS_MOUSEGlycine--tRNA ligase OS=Mus musculus OX=10090 GN=Gars1 PE=1 SV=1
Chromosome 11	Choren_v00_mik.OX359199.1G420.1	THAP4_BOVINPeroxynitrite isomerase THAP4 OS=Bos taurus OX=9913 GN=THAP4 PE=2 SV=2	Mutation of the Thap4 gene causes dwarfism and testicular anomalies in rats and mice	https://pubmed.ncbi.nlm.nih.gov/38658415/
Chromosome 11	Choren_v00_mik.OX359199.1G421.1	VF030_IIV3Uncharacterized protein 106R OS=Invertebrate iridescent virus 3 OX=345201 GN=IIV3-106R PE=3 SV=1
Chromosome 11	Choren_v00_mik.OX359199.1G429.1	RTJK_DROMERNA-directed DNA polymerase from mobile element jockey OS=Drosophila melanogaster OX=7227 GN=pol PE=1 SV=1	is shared between SDR contigs from both Chinook salmon and rainbow trout.	https://academic.oup.com/gbe/article/7/7/1972/631962	There are two main transposon candidates responsible for the novel SDR insertions: TC1-like transposase and RNA-directed DNA polymerase from mobile jockey-like elements	ncbi.nlm.nih.gov/pmc/articles/PMC4879163/	positioned in the regions that female RNA-Seq reads mapped more than twice as many as in males, such as ‘transposons ‘RNA-directed DNA polymerase from mobile element jockey-like’
Chromosome 11	Choren_v00_mik.OX359199.1G431.1	RTJK_DROMERNA-directed DNA polymerase from mobile element jockey OS=Drosophila melanogaster OX=7227 GN=pol PE=1 SV=1
Chromosome 11	Choren_v00_mik.OX359199.1G437.1	RTJK_DROMERNA-directed DNA polymerase from mobile element jockey OS=Drosophila melanogaster OX=7227 GN=pol PE=1 SV=1
Chromosome 11	Choren_v00_mik.OX359199.1G440.1	VF030_IIV3Uncharacterized protein 106R OS=Invertebrate iridescent virus 3 OX=345201 GN=IIV3-106R PE=3 SV=1
Chromosome 11	Choren_v00_mik.OX359199.1G441.1	PIF1_RATATP-dependent DNA helicase PIF1 OS=Rattus norvegicus OX=10116 GN=Pif1 PE=2 SV=1	seven genes were identified using sex-specific SNPs, including...and pif1.	https://link.springer.com/article/10.1186/s12864-022-08632-3
Chromosome 11	Choren_v00_mik.OX359199.1G442.1	PIF1_XENLAATP-dependent DNA helicase PIF1 OS=Xenopus laevis OX=8355 GN=pif1 PE=2 SV=1
Chromosome 11	Choren_v00_mik.OX359199.1G443.1	VF030_IIV3Uncharacterized protein 106R OS=Invertebrate iridescent virus 3 OX=345201 GN=IIV3-106R PE=3 SV=1
Chromosome 11	Choren_v00_mik.OX359199.1G447.1	JERKL_HUMANJerky protein homolog-like OS=Homo sapiens OX=9606 GN=JRKL PE=2 SV=2
Chromosome 11	Choren_v00_mik.OX359199.1G449.1	PO21_NASVIRetrovirus-related Pol polyprotein from type-1 retrotransposable element R2 (Fragment) OS=Nasonia vitripennis OX=7425 PE=4 SV=2
Chromosome 11	Choren_v00_mik.OX359199.1G454.1	RTBS_DROMEProbable RNA-directed DNA polymerase from transposon BS OS=Drosophila melanogaster OX=7227 GN=RTase PE=2 SV=1	Transposons in germline were recently demonstrated as a factor driving genome evolution29. Our study identified high expression levels of RNA-directed DNA polymerase from transposon BS (rtbs), which is involved in retrotransposon processes, in ovary	https://www.ncbi.nlm.nih.gov/pmc/articles/PMC7090014/	Our study identified high expression levels of RNA-directed DNA polymerase from transposon BS (rtbs), which is involved in retrotransposon processes, in ovary.	https://www.nature.com/articles/s41598-020-61738-0
Chromosome 11	Choren_v00_mik.OX359199.1G455.1	POL_MPMVGag-Pro-Pol polyprotein OS=Mason-Pfizer monkey virus OX=11855 GN=gag-pro-pol PE=1 SV=2	Expression is higher in the left ovary than in the right one, lower in the left testis, and absent in the right testis.	https://retrovirology.biomedcentral.com/articles/10.1186/1742-4690-6-59
Chromosome 11	Choren_v00_mik.OX359199.1G458.1	PIF1_DANREATP-dependent DNA helicase PIF1 OS=Danio rerio OX=7955 GN=pif1 PE=2 SV=1
Chromosome 11	Choren_v00_mik.OX359199.1G465.1	PIF1_DANREATP-dependent DNA helicase PIF1 OS=Danio rerio OX=7955 GN=pif1 PE=2 SV=1
Chromosome 11	Choren_v00_mik.OX359199.1G466.1	VF030_IIV3Uncharacterized protein 106R OS=Invertebrate iridescent virus 3 OX=345201 GN=IIV3-106R PE=3 SV=1
Chromosome 11	Choren_v00_mik.OX359199.1G467.1	POLR_DROMERetrovirus-related Pol polyprotein from type-2 retrotransposable element R2DM OS=Drosophila melanogaster OX=7227 GN=pol PE=4 SV=1	Notably, these 265 male-specific sequences were largely annotated as non-protein coding genes, which contained 7 pol transposons	https://link.springer.com/article/10.1007/s10126-024-10364-2
Chromosome 11	Choren_v00_mik.OX359199.1G469.1	PHF2_DANRELysine-specific demethylase phf2 OS=Danio rerio OX=7955 GN=phf2 PE=2 SV=3
Chromosome 11	Choren_v00_mik.OX359199.1G470.1	GIN1_PONABGypsy retrotransposon integrase-like protein 1 OS=Pongo abelii OX=9601 GN=GIN1 PE=2 SV=1	Crucial Role of Ty3/Gypsy in Sex Chromosome Evolution	https://www.ncbi.nlm.nih.gov/pmc/articles/PMC9025612/	https://www.ncbi.nlm.nih.gov/pmc/articles/PMC9301316/
Chromosome 11	Choren_v00_mik.OX359199.1G473.1	RTBS_DROMEProbable RNA-directed DNA polymerase from transposon BS OS=Drosophila melanogaster OX=7227 GN=RTase PE=2 SV=1
Chromosome 11	Choren_v00_mik.OX359199.1G476.1	PAR14_HUMANProtein mono-ADP-ribosyltransferase PARP14 OS=Homo sapiens OX=9606 GN=PARP14 PE=1 SV=3
Chromosome 11	Choren_v00_mik.OX359199.1G479.1	DC2I1_MOUSECytoplasmic dynein 2 intermediate chain 1 OS=Mus musculus OX=10090 GN=Dync2i1 PE=1 SV=1	The encoded protein contains four WD repeats and may play a role in the formation of cilia	https://www.ncbi.nlm.nih.gov/gene?Db=gene&Cmd=DetailsSearch&Term=55112	https://pubmed.ncbi.nlm.nih.gov/30320547/
Chromosome 11	Choren_v00_mik.OX359199.1G482.1	MYO1A_CHICKUnconventional myosin-Ia OS=Gallus gallus OX=9031 GN=MYO1A PE=1 SV=2
Chromosome 11	Choren_v00_mik.OX359199.1G483.1	PAR14_HUMANProtein mono-ADP-ribosyltransferase PARP14 OS=Homo sapiens OX=9606 GN=PARP14 PE=1 SV=3
Chromosome 11	Choren_v00_mik.OX359199.1G486.1	ECM29_DROMEProteasome-associated protein ECM29 homolog OS=Drosophila melanogaster OX=7227 GN=CG8858 PE=1 SV=1
Chromosome 11	Choren_v00_mik.OX359199.1G487.1	PTPRE_HUMANReceptor-type tyrosine-protein phosphatase epsilon OS=Homo sapiens OX=9606 GN=PTPRE PE=1 SV=1
Chromosome 11	Choren_v00_mik.OX359199.1G492.1	SCND3_HUMANSCAN domain-containing protein 3 OS=Homo sapiens OX=9606 GN=ZBED9 PE=1 SV=1
Chromosome 11	Choren_v00_mik.OX359199.1G496.1	HDAC4_RATHistone deacetylase 4 OS=Rattus norvegicus OX=10116 GN=Hdac4 PE=1 SV=2
Chromosome 11	Choren_v00_mik.OX359199.1G497.1	AF10_HUMANProtein AF-10 OS=Homo sapiens OX=9606 GN=MLLT10 PE=1 SV=2	The DOT1L-MLLT10 complex regulates male fertility and promotes histone removal during spermiogenesis	https://journals.biologists.com/dev/article/150/9/dev201501/309501/The-DOT1L-MLLT10-complex-regulates-male-fertility
Chromosome 11	Choren_v00_mik.OX359199.1G498.1	PSD11_HUMAN26S proteasome non-ATPase regulatory subunit 11 OS=Homo sapiens OX=9606 GN=PSMD11 PE=1 SV=3
Chromosome 11	Choren_v00_mik.OX359199.1G500.1	CENPE_HUMANCentromere-associated protein E OS=Homo sapiens OX=9606 GN=CENPE PE=1 SV=2
Chromosome 11	Choren_v00_mik.OX359199.1G505.1	CC148_MOUSECoiled-coil domain-containing protein 148 OS=Mus musculus OX=10090 GN=Ccdc148 PE=2 SV=1
Chromosome 2	Choren_v00_mik.OX359190.1G557.1	CK5P3_RATCDK5 regulatory subunit-associated protein 3 OS=Rattus norvegicus OX=10116 GN=Cdk5rap3 PE=1 SV=1	Eight up-regulated genes involved in checkpoint control were p53, p63, ATM (ataxia telangiectasia mutated), Mdm2 (murine double minute 2), encoding CDK5 subunits Cdk5rap1 and Cdk5rap3, Msh2	https://onlinelibrary.wiley.com/doi/full/10.1042/BC20090021
Chromosome 2	Choren_v00_mik.OX359190.1G558.1	OFUT2_MOUSEGDP-fucose protein O-fucosyltransferase 2 OS=Mus musculus OX=10090 GN=Pofut2 PE=1 SV=1
Chromosome 2	Choren_v00_mik.OX359190.1G561.1	VF030_IIV6Uncharacterized protein 030L OS=Invertebrate iridescent virus 6 OX=176652 GN=IIV6-030L PE=3 SV=1
Chromosome 2	Choren_v00_mik.OX359190.1G562.1	PIF1_RATATP-dependent DNA helicase PIF1 OS=Rattus norvegicus OX=10116 GN=Pif1 PE=2 SV=1
Chromosome 2	Choren_v00_mik.OX359190.1G568.1	LIN1_NYCCOLINE-1 reverse transcriptase homolog OS=Nycticebus coucang OX=9470 PE=4 SV=1	human Y chromosome contains nine times as many full-length (FL) ancestral LINE-1 (L1) elements per megabase as do autosomes and that the X chromosome contains three times as many	https://academic.oup.com/mbe/article/18/6/926/1046908
Chromosome 2	Choren_v00_mik.OX359190.1G569.1	TIGD4_HUMANTigger transposable element-derived protein 4 OS=Homo sapiens OX=9606 GN=TIGD4 PE=1 SV=2
Chromosome 2	Choren_v00_mik.OX359190.1G571.1	TIGD1_HUMANTigger transposable element-derived protein 1 OS=Homo sapiens OX=9606 GN=TIGD1 PE=1 SV=1	A total of 13 potential candidate genes were further identified from sex-related QTL... and tigger transposable element-derived protein 1-like (tigd1)	https://www.ncbi.nlm.nih.gov/pmc/articles/PMC8886229/
Chromosome 2	Choren_v00_mik.OX359190.1G575.1	POLR_DROMERetrovirus-related Pol polyprotein from type-2 retrotransposable element R2DM OS=Drosophila melanogaster OX=7227 GN=pol PE=4 SV=1
Chromosome 2	Choren_v00_mik.OX359190.1G576.1	SODM_RATSuperoxide dismutase
Chromosome 2	Choren_v00_mik.OX359190.1G579.1	SKP1_HUMANS-phase kinase-associated protein 1 OS=Homo sapiens OX=9606 GN=SKP1 PE=1 SV=2	SKR-1, a homolog of Skp1 and a member of the SCF(SEL-10) complex, regulates sex-determination and LIN-12/Notch signaling in C. elegans	https://pubmed.ncbi.nlm.nih.gov/18718460/
Chromosome 2	Choren_v00_mik.OX359190.1G580.1	PIF1_XENLAATP-dependent DNA helicase PIF1 OS=Xenopus laevis OX=8355 GN=pif1 PE=2 SV=1
Chromosome 2	Choren_v00_mik.OX359190.1G585.1	WRN_HUMANBifunctional 3'-5' exonuclease/ATP-dependent helicase WRN OS=Homo sapiens OX=9606 GN=WRN PE=1 SV=2
Chromosome 2	Choren_v00_mik.OX359190.1G587.1	TIGD2_HUMANTigger transposable element-derived protein 2 OS=Homo sapiens OX=9606 GN=TIGD2 PE=3 SV=1
Chromosome 2	Choren_v00_mik.OX359190.1G591.1	YTX2_XENLATransposon TX1 uncharacterized 149 kDa protein OS=Xenopus laevis OX=8355 PE=4 SV=1
Chromosome 2	Choren_v00_mik.OX359190.1G592.1	LORF2_HUMANLINE-1 retrotransposable element ORF2 protein OS=Homo sapiens OX=9606 PE=1 SV=1
Chromosome 2	Choren_v00_mik.OX359190.1G594.1	TIGD4_MOUSETigger transposable element-derived protein 4 OS=Mus musculus OX=10090 GN=Tigd4 PE=2 SV=1
Chromosome 2	Choren_v00_mik.OX359190.1G598.1	RAG1_XENLAV(D)J recombination-activating protein 1 OS=Xenopus laevis OX=8355 GN=rag1 PE=2 SV=1
Chromosome 2	Choren_v00_mik.OX359190.1G601.1	PIF1_DANREATP-dependent DNA helicase PIF1 OS=Danio rerio OX=7955 GN=pif1 PE=2 SV=1
Chromosome 2	Choren_v00_mik.OX359190.1G606.1	NIPBL_MOUSENipped-B-like protein OS=Mus musculus OX=10090 GN=Nipbl PE=1 SV=1	In Silico Analysis of Seven PCR Markers Developed from the CHD1, NIPBL and SPIN Genes Followed by Laboratory Testing Shows How to Reliably Determine the Sex of Musophagiformes Species	https://www.ncbi.nlm.nih.gov/pmc/articles/PMC9140868/		In the candidate sex determination region, five male-biased genes (kmt5a-a, kmt5a-b, g2e3, nipbl, and syce1)	https://link.springer.com/article/10.1186/s12864-022-08632-3	Due to the distinct size differences in Z and W amplicons (200 bp in CHD1 intron 16, 400 bp in NIPBL intron 16, and 500 bp in CHD1 intron 9), these markers are not prone to misinterpretation	https://academic.oup.com/mbe/article/28/11/2993/1047574?login=false
Chromosome 2	Choren_v00_mik.OX359190.1G612.1	TIGD2_HUMANTigger transposable element-derived protein 2 OS=Homo sapiens OX=9606 GN=TIGD2 PE=3 SV=1
Chromosome 2	Choren_v00_mik.OX359190.1G614.1	DNAS1_CHICKDeoxyribonuclease-1 OS=Gallus gallus OX=9031 GN=DNASE1 PE=1 SV=1
Chromosome 2	Choren_v00_mik.OX359190.1G613.1	SODM_RATSuperoxide dismutase
Chromosome 2	Choren_v00_mik.OX359190.1G615.2	SKP1_HUMANS-phase kinase-associated protein 1 OS=Homo sapiens OX=9606 GN=SKP1 PE=1 SV=2
Chromosome 2	Choren_v00_mik.OX359190.1G616.1	CXXC1_HUMANCXXC-type zinc finger protein 1 OS=Homo sapiens OX=9606 GN=CXXC1 PE=1 SV=2	CFP1-dependent histone H3K4 trimethylation in murine oocytes facilitates ovarian follicle recruitment and ovulation in a cell-nonautonomous manner	https://link.springer.com/article/10.1007/s00018-019-03322-y
Chromosome 2	Choren_v00_mik.OX359190.1G618.1	VF030_IIV3Uncharacterized protein 106R OS=Invertebrate iridescent virus 3 OX=345201 GN=IIV3-106R PE=3 SV=1
Chromosome 2	Choren_v00_mik.OX359190.1G625.1	PIF1_XENLAATP-dependent DNA helicase PIF1 OS=Xenopus laevis OX=8355 GN=pif1 PE=2 SV=1
Chromosome 2	Choren_v00_mik.OX359190.1G631.1	TIGD4_HUMANTigger transposable element-derived protein 4 OS=Homo sapiens OX=9606 GN=TIGD4 PE=1 SV=2
Chromosome 2	Choren_v00_mik.OX359190.1G633.1	PIF1_DANREATP-dependent DNA helicase PIF1 OS=Danio rerio OX=7955 GN=pif1 PE=2 SV=1
Chromosome 2	Choren_v00_mik.OX359190.1G634.1	POL3_DROMERetrovirus-related Pol polyprotein from transposon 17.6 OS=Drosophila melanogaster OX=7227 GN=pol PE=4 SV=1
Chromosome 2	Choren_v00_mik.OX359190.1G644.1	YRD6_CAEELUncharacterized protein K02A2.6 OS=Caenorhabditis elegans OX=6239 GN=K02A2.6 PE=4 SV=1
Chromosome 2	Choren_v00_mik.OX359190.1G645.1	POL2_DROMERetrovirus-related Pol polyprotein from transposon 297 OS=Drosophila melanogaster OX=7227 GN=pol PE=4 SV=1
Chromosome 2	Choren_v00_mik.OX359190.1G649.1	PIF1_XENLAATP-dependent DNA helicase PIF1 OS=Xenopus laevis OX=8355 GN=pif1 PE=2 SV=1
Chromosome 2	Choren_v00_mik.OX359190.1G656.1	VF030_IIV6Uncharacterized protein 030L OS=Invertebrate iridescent virus 6 OX=176652 GN=IIV6-030L PE=3 SV=1
Chromosome 2	Choren_v00_mik.OX359190.1G657.1	POL5_DROMERetrovirus-related Pol polyprotein from transposon opus OS=Drosophila melanogaster OX=7227 GN=pol PE=4 SV=1
Chromosome 2	Choren_v00_mik.OX359190.1G662.1	POL4_DROMERetrovirus-related Pol polyprotein from transposon 412 OS=Drosophila melanogaster OX=7227 GN=POL PE=4 SV=1
Chromosome 2	Choren_v00_mik.OX359190.1G668.1	ZMYM1_HUMANZinc finger MYM-type protein 1 OS=Homo sapiens OX=9606 GN=ZMYM1 PE=1 SV=1
Chromosome 2	Choren_v00_mik.OX359190.1G667.1	VF030_IIV3Uncharacterized protein 106R OS=Invertebrate iridescent virus 3 OX=345201 GN=IIV3-106R PE=3 SV=1
Chromosome 2	Choren_v00_mik.OX359190.1G669.1	VF030_IIV6Uncharacterized protein 030L OS=Invertebrate iridescent virus 6 OX=176652 GN=IIV6-030L PE=3 SV=1
Chromosome 2	Choren_v00_mik.OX359190.1G671.1	YSM6_CAEELPutative uncharacterized transposon-derived protein F52C9.6 OS=Caenorhabditis elegans OX=6239 GN=F52C9.6 PE=5 SV=1
Chromosome 2	Choren_v00_mik.OX359190.1G676.1	RTBS_DROMEProbable RNA-directed DNA polymerase from transposon BS OS=Drosophila melanogaster OX=7227 GN=RTase PE=2 SV=1
Chromosome 2	Choren_v00_mik.OX359190.1G677.1	PIF1_XENLAATP-dependent DNA helicase PIF1 OS=Xenopus laevis OX=8355 GN=pif1 PE=2 SV=1
Chromosome 2	Choren_v00_mik.OX359190.1G687.1	LORF2_HUMANLINE-1 retrotransposable element ORF2 protein OS=Homo sapiens OX=9606 PE=1 SV=1
Chromosome 2	Choren_v00_mik.OX359190.1G686.1	CFDP2_BOVINCraniofacial development protein 2 OS=Bos taurus OX=9913 GN=CFDP2 PE=1 SV=2
Chromosome 2	Choren_v00_mik.OX359190.1G688.1	POL4_DROMERetrovirus-related Pol polyprotein from transposon 412 OS=Drosophila melanogaster OX=7227 GN=POL PE=4 SV=1
Chromosome 2	Choren_v00_mik.OX359190.1G690.1	POL4_DROMERetrovirus-related Pol polyprotein from transposon 412 OS=Drosophila melanogaster OX=7227 GN=POL PE=4 SV=1
Chromosome 2	Choren_v00_mik.OX359190.1G689.1	POL3_DROMERetrovirus-related Pol polyprotein from transposon 17.6 OS=Drosophila melanogaster OX=7227 GN=pol PE=4 SV=1
Chromosome 2	Choren_v00_mik.OX359190.1G694.1	ZBED5_BOVINZinc finger BED domain-containing protein 5 OS=Bos taurus OX=9913 GN=ZBED5 PE=4 SV=1	Three Copies of zbed1 Specific in Chromosome W Are Essential for Female-Biased Sexual Size Dimorphism in Cynoglossus semilaevi	https://www.ncbi.nlm.nih.gov/pmc/articles/PMC10967968/
Chromosome 2	Choren_v00_mik.OX359190.1G701.1	PIF1_RATATP-dependent DNA helicase PIF1 OS=Rattus norvegicus OX=10116 GN=Pif1 PE=2 SV=1
Chromosome 2	Choren_v00_mik.OX359190.1G715.1	IRAK1_HUMANInterleukin-1 receptor-associated kinase 1 OS=Homo sapiens OX=9606 GN=IRAK1 PE=1 SV=2	X-linked IRAK1 polymorphism is associated with sex-related differences in polymorphonuclear granulocyte and monocyte activation and response variabilities	https://www.ncbi.nlm.nih.gov/pmc/articles/PMC6952590/
Chromosome 2	Choren_v00_mik.OX359190.1G716.1	TIGD4_MOUSETigger transposable element-derived protein 4 OS=Mus musculus OX=10090 GN=Tigd4 PE=2 SV=1
Chromosome 2	Choren_v00_mik.OX359190.1G718.1	HIBCH_XENLA3-hydroxyisobutyryl-CoA hydrolase, mitochondrial OS=Xenopus laevis OX=8355 GN=hibch PE=2 SV=1
Chromosome 2	Choren_v00_mik.OX359190.1G721.1	ASCC2_HUMANActivating signal cointegrator 1 complex subunit 2 OS=Homo sapiens OX=9606 GN=ASCC2 PE=1 SV=3	Chromosomal Context Affects the Molecular Evolution of Sex-linked Genes and Their Autosomal Counterparts in Turtles and Other Vertebrates	https://academic.oup.com/jhered/article/108/7/720/4259380
Chromosome 2	Choren_v00_mik.OX359190.1G722.1	POL3_DROMERetrovirus-related Pol polyprotein from transposon 17.6 OS=Drosophila melanogaster OX=7227 GN=pol PE=4 SV=1
Chromosome 2	Choren_v00_mik.OX359190.1G726.1	PGBD3_HUMANPiggyBac transposable element-derived protein 3 OS=Homo sapiens OX=9606 GN=PGBD3 PE=1 SV=3	Independent origin of XY and ZW sex determination mechanisms in Mosquitofish sister species	https://hal.inrae.fr/hal-02624941v1/file/genetics0193.pdf
Chromosome 2	Choren_v00_mik.OX359190.1G732.1	POGZ_MOUSEPogo transposable element with ZNF domain OS=Mus musculus OX=10090 GN=Pogz PE=1 SV=2
Chromosome 2	Choren_v00_mik.OX359190.1G734.1	PAR14_HUMANProtein mono-ADP-ribosyltransferase PARP14 OS=Homo sapiens OX=9606 GN=PARP14 PE=1 SV=3
Chromosome 2	Choren_v00_mik.OX359190.1G746.1	ZNT2_MOUSEProton-coupled zinc antiporter SLC30A2 OS=Mus musculus OX=10090 GN=Slc30a2 PE=1 SV=1
Chromosome 2	Choren_v00_mik.OX359190.1G747.1	DAZP2_MACFADAZ-associated protein 2 OS=Macaca fascicularis OX=9541 GN=DAZAP2 PE=2 SV=1	This gene encodes a proline-rich protein which interacts with the deleted in azoospermia (DAZ) gene	https://www.ncbi.nlm.nih.gov/gene/9802
Chromosome 2	Choren_v00_mik.OX359190.1G748.1	ADAS_CAVPOAlkyldihydroxyacetonephosphate synthase, peroxisomal OS=Cavia porcellus OX=10141 GN=AGPS PE=1 SV=1
Chromosome 2	Choren_v00_mik.OX359190.1G745.1	ZN862_HUMANZinc finger protein 862 OS=Homo sapiens OX=9606 GN=ZNF862 PE=2 SV=2
Chromosome 2	Choren_v00_mik.OX359190.1G749.1	ADAS_RATAlkyldihydroxyacetonephosphate synthase, peroxisomal OS=Rattus norvegicus OX=10116 GN=Agps PE=1 SV=1
Chromosome 2	Choren_v00_mik.OX359190.1G752.1	RNF41_PONABE3 ubiquitin-protein ligase NRDP1 OS=Pongo abelii OX=9601 GN=RNF41 PE=2 SV=1
Chromosome 2	Choren_v00_mik.OX359190.1G756.1	Y2R2_DROMEPutative 115 kDa protein in type-1 retrotransposable element R1DM OS=Drosophila melanogaster OX=7227 GN=R1A1-element\ORF2 PE=4 SV=1
Chromosome 2	Choren_v00_mik.OX359190.1G760.1	ZMYM1_HUMANZinc finger MYM-type protein 1 OS=Homo sapiens OX=9606 GN=ZMYM1 PE=1 SV=1
Chromosome 2	Choren_v00_mik.OX359190.1G764.1	LORF2_HUMANLINE-1 retrotransposable element ORF2 protein OS=Homo sapiens OX=9606 PE=1 SV=1
Chromosome 2	Choren_v00_mik.OX359190.1G766.1	PGBD4_HUMANPiggyBac transposable element-derived protein 4 OS=Homo sapiens OX=9606 GN=PGBD4 PE=2 SV=3
Chromosome 2	Choren_v00_mik.OX359190.1G767.1	RTBS_DROMEProbable RNA-directed DNA polymerase from transposon BS OS=Drosophila melanogaster OX=7227 GN=RTase PE=2 SV=1

## Sheet: B. Oscarella_lobularis
Chromosome	Gene	Blast	Function	Ref
Chromosome 5	Osclob_v00_mik.OX382154.1G594.1	JERKY
Chromosome 5	Osclob_v00_mik.OX382154.1G595.1	RECQ	https://link.springer.com/article/10.1186/s12864-022-08632-3	https://www.nature.com/articles/s41419-022-04815-8
Chromosome 5	Osclob_v00_mik.OX382154.1G601.1	HUS2	https://pubmed.ncbi.nlm.nih.gov/16303848/
Chromosome 5	Osclob_v00_mik.OX382154.1G620.1	SUH	https://karger.com/sxd/article/9/6/297/296460
Chromosome 5	Osclob_v00_mik.OX382154.1G628.1	CENPB	https://www.pnas.org/doi/abs/10.1073/pnas.1109988108	https://www.sciencedirect.com/science/article/pii/S0891584919305362?casa_token=sOOegCsIWsoAAAAA:ghC1t5cbHp03SQNVCj5FCF1sgaXuf87tFte00E7NkqIyJDUMvp_8EUsyrYwxcz7kWLK_mAt5HZs
Chromosome 5	Osclob_v00_mik.OX382154.1G631.1	G2E3	https://bmcgenomics.biomedcentral.com/articles/10.1186/s12864-022-08632-3#:~:text=G2e3%20was%20an%20ancestral%20gene,fate%20and%20spermatogenesis%20%5B77%5D.	https://royalsocietypublishing.org/doi/10.1098/rspb.2017.0324
Chromosome 5	Osclob_v00_mik.OX382154.1G632.1	BLM	https://www.nature.com/articles/s41419-022-04815-8	https://www.sciencedirect.com/science/article/pii/S0167478198000669
Chromosome 5	Osclob_v00_mik.OX382154.1G636.1	PIF1	https://pubmed.ncbi.nlm.nih.gov/28253373/	https://link.springer.com/article/10.1186/s12864-022-08632-3
Chromosome 5	Osclob_v00_mik.OX382154.1G644.1	FAN1	https://www.sciencedirect.com/science/article/pii/B9780123813206000205?casa_token=Ep7quxR9i4YAAAAA:ZJgrL3CjQiXOxoVWFOyAH4Fmgz6RNsocAaC11vvXvqs5XV5rWf8tVqzaMgfdBqNWz4LnjynxcsY	chrome-extension://efaidnbmnnnibpcajpcglclefindmkaj/https://watermark.silverchair.com/evab119.pdf?token=AQECAHi208BE49Ooan9kkhW_Ercy7Dm3ZL_9Cf3qfKAc485ysgAAA1EwggNNBgkqhkiG9w0BBwagggM-MIIDOgIBADCCAzMGCSqGSIb3DQEHATAeBglghkgBZQMEAS4wEQQM8LwNMu9LQehkVpQyAgEQgIIDBMyCXBvbO6H61kvpZreUZ0GCfB4jfqPiG-UjrXtilfLwxzXknLfpjSgFkNorrjfFhhGCGsVkW6KdnbyQdp7sQtmteLrQvpi1o5z4GOqiKAHLhBE0fJNLgO29nRQUahPpmIML5ZclM95…
Chromosome 5	Osclob_v00_mik.OX382154.1G654.1	PIF1	https://pubmed.ncbi.nlm.nih.gov/28253373/	https://link.springer.com/article/10.1186/s12864-022-08632-3
Chromosome 5	Osclob_v00_mik.OX382154.1G660.1	YRD6	https://www.sciencedirect.com/science/article/pii/S0166445X16302843?casa_token=Ml2rNVBWc6cAAAAA:BbwTItzc--JipBWkWYjGbP8g2GKCXUc47cbb92R-1QPCfTZkrir8t0vJ_1eqR8jpcepJAZn0RGE
Chromosome 5	Osclob_v00_mik.OX382154.1G666.1	YG31B	https://pmc.ncbi.nlm.nih.gov/articles/PMC9025612/
Chromosome 5	Osclob_v00_mik.OX382154.1G674.1	DYH10	https://www.cell.com/ajhg/fulltext/S0002-9297(21)00234-2
Chromosome 5	Osclob_v00_mik.OX382154.1G678.1	DAPK1	https://journals.sagepub.com/doi/abs/10.3184/175815515X14380769320720?casa_token=_hNpO3Il8vQAAAAA:vckKJeHTUIf2POJd2BjAGrjsfP5VMQ2Ha4x-ZD2-_LWy-J_93nxEp7y-0TPxF9-dOa97o1PJtw9eXA	https://pmc.ncbi.nlm.nih.gov/articles/PMC4574023/
Chromosome 5	Osclob_v00_mik.OX382154.1G694.1	FGFR2	https://www.pnas.org/doi/abs/10.1073/pnas.0702581104	https://academic.oup.com/hmg/article/24/23/6699/2385744
