# Supplementary material for: Sponge genomes reveal a pre-metazoan origin of the sex determination toolkit and sex chromosomes
Source: Research Square preprint supplement (doi:10.21203/rs.3.rs-8554461/v1), 2026-02-12
Supplement: Supplementary file 5 [file 329e0ceac6b224f6fa77c1dd.xlsx]

## Sheet: Sheet1
Species	Class	Order	Site	N individuals	depth (m)	coordinates	sex ratio (M:F)	%repro	sex ratio skewed to	sexual system
Axinella damicornis	Demospongiae	Agelasida	Santa Anna, Blanes, Spain	21	5	41.6734, 2.8026	2 : 1	28.5714	>M	XY
Chondrosia reniformis	Demospongiae	Chondrosiida	Santa Anna, Blanes, Spain/Naples, Italy	35	5	41.6734, 2.8026 / 40.6965, 13.8833	1 : 1.33	40	>F	ZW
Geodia barretti	Demospongiae	Tetractinellida	W Rosemary Bank Seamount	11	1034	59.2, -10.25	1 : 1	26.6667	=	XY
Geodia hentscheli	Demospongiae	Tetractinellida	Vesterisbanken	10	580	73.5195, 9.113111	1 : 2	60	>F	XY
Oscarella lobularis	Homoscleromorpha	Homosclerophorida	Santa Anna, Blanes, Spain/Naples, Italy	14	5	41.6734, 2.8026 / 40.6965, 13.8833	1.2 : 1	78.5714	>M	XY
Phakellia ventilabrum	Demospongiae	Bubarida	Korsjfjord, Nowrway/Langenuen and Korsenfjord, Sweden	13	80	59.9813, 5.3738 / 59.8728, 5.54989	1.67 : 1	57.8947	>F	XY
Petrosia ficiformis	Demospongiae	Haplosclerida	L'Escala, Spain/Santa Anna, Blanes, Spain	17	5	42.1135, 3.16593 / 41.6734, 2.8026	1 : 2	64.7059	>F	ZW
Halichondria panicea	Demospongiae	Suberitida	Kiel, Germany	15	5	54.452695, 10.198803	1 : 2	73	>F	ZW
