# Supplementary material for: Sponge genomes reveal a pre-metazoan origin of the sex determination toolkit and sex chromosomes
Source: Research Square preprint supplement (doi:10.21203/rs.3.rs-8554461/v1), 2026-02-12
Supplement: Supplementary file 6 [file 3c21abda7727fcb4cf33b9fb.xlsx]

## Sheet: A_SDR_chromosome2_Creniformis
	Males (TPMs)					Females (TPMs)					Average Expression
Gene_ID	Ch21_21_M	Ch5_20_M	ChNap22_20_M	ChNap22_24_M	ChNap22_22_M	ChNap22_23_F	Ch4_20_F	ChNap22_6_F	Ch7_20_F	ChNap22_10_F	AVERAGE_M	AVERAGE_F	Gene_abbreviation	Gene_Description	Known_sex_function
Choren_v00_mik.OX359190.1G555.1	3137	58	142	357	534	5	78	26	180	128	83.4	845.6	CK5P3	CDK5 regulatory subunit-associated protein 3
Choren_v00_mik.OX359190.1G549.1	0	1	0	1	0	0	0	0	0	0	0	0.4
Choren_v00_mik.OX359190.1G550.1	0	0	0	0	0	0	0	0	0	0	0	0	-
Choren_v00_mik.OX359190.1G556.1	0	0	0	0	0	0	0	0	0	0	0	0	-
Choren_v00_mik.OX359190.1G551.1	1893	135	274	785	206	18	8	81	188	120	83	658.6
Choren_v00_mik.OX359190.1G551.2	199	51	110	29	25	140	2	9	103	12	53.2	82.8
Choren_v00_mik.OX359190.1G557.1	4359	264	1030	2488	463	1064	132	767	1540	762	853	1720.8	CK5P3	CDK5 regulatory subunit-associated protein 3	YES
Choren_v00_mik.OX359190.1G558.1	0	0	0	0	0	0	0	0	0	0	0	0	OFUT2	GDP-fuce protein O-fucyltransferase 2
Choren_v00_mik.OX359190.1G559.1	0	4	84	0	0	18	0	6	2	0	5.2	17.6	-
Choren_v00_mik.OX359190.1G560.1	0	0	0	0	0	0	0	0	0	0	0	0	-
Choren_v00_mik.OX359190.1G561.1	0	0	0	0	0	0	0	0	0	0	0	0	VF030	IIV6Uncharacterized protein 030L
Choren_v00_mik.OX359190.1G562.1	0	0	0	0	0	0	0	0	0	0	0	0	PIF1	ATP-dependent DNA helicase PIF1
Choren_v00_mik.OX359190.1G563.1	0	0	0	0	0	0	0	0	0	0	0	0	-
Choren_v00_mik.OX359190.1G564.1	0	0	0	0	0	0	0	0	0	0	0	0	-
Choren_v00_mik.OX359190.1G565.1	0	0	0	0	0	0	0	0	0	0	0	0	-
Choren_v00_mik.OX359190.1G566.1	0	0	0	0	0	0	0	0	0	0	0	0	-
Choren_v00_mik.OX359190.1G567.1	0	0	0	0	0	0	0	0	0	0	0	0	-
Choren_v00_mik.OX359190.1G568.1	4	0	12	0	0	0	0	0	0	0	0	3.2	LIN1	LINE-1 reverse transcriptase homolog	YES
Choren_v00_mik.OX359190.1G569.1	0	0	0	0	0	0	0	0	0	0	0	0	TIGD4	Tigger transpable element-derived protein 4
Choren_v00_mik.OX359190.1G570.1	0	0	0	0	0	0	0	0	0	0	0	0	-
Choren_v00_mik.OX359190.1G571.1	3	125	9	111	0	0	2	29	118	170	63.8	49.6	TIGD1	Tigger transpable element-derived protein 1	YES
Choren_v00_mik.OX359190.1G577.1	707	362	343	208	139	451	107	119	69	136	176.4	351.8	-
Choren_v00_mik.OX359190.1G572.1	17	3	6	0	5	0	0	20	4	0	4.8	6.2	-
Choren_v00_mik.OX359190.1G573.1	8	0	0	0	0	0	0	0	2	0	0.4	1.6	-
Choren_v00_mik.OX359190.1G574.1	15	0	0	247	0	0	0	147	21	280	89.6	52.4	-
Choren_v00_mik.OX359190.1G575.1	12	0	0	0	91	0	0	0	4	0	0.8	20.6	POLR	Retrovirus-related Pol polyprotein from type-2 retrotranspable element R2DM
Choren_v00_mik.OX359190.1G578.1	2	0	1	2	1	1	1	12	2	9	5	1.2	-
Choren_v00_mik.OX359190.1G576.1	624	1740	2758	230	2807	2616	1198	455	3551	929	1749.8	1631.8	SODM	Superoxide dismutase
Choren_v00_mik.OX359190.1G579.1	23	468	295	598	33	560	261	3590	1569	33	1202.6	283.4	SKP1	S-phase kinase-associated protein 1	YEs
Choren_v00_mik.OX359190.1G579.2	50	662	431	614	41	724	349	2769	1765	4	1122.2	359.6	SKP1	S-phase kinase-associated protein 1
Choren_v00_mik.OX359190.1G580.1	0	0	0	0	0	7	1	0	3	0	2.2	0	PIF1	ATP-dependent DNA helicase PIF1	YES
Choren_v00_mik.OX359190.1G583.1	0	0	0	0	0	4	4	0	0	0	1.6	0	-
Choren_v00_mik.OX359190.1G584.1	0	0	6	0	0	0	0	0	0	4	0.8	1.2	-
Choren_v00_mik.OX359190.1G581.1	0	0	0	0	0	5	4	0	0	0	1.8	0
Choren_v00_mik.OX359190.1G582.1	0	0	0	0	0	0	0	0	0	0	0	0	-
Choren_v00_mik.OX359190.1G585.1	0	0	0	0	0	10	0	0	4	0	2.8	0	WRN	Bifunctional 3'-5' exonuclease/ATP-dependent helicase WRN
Choren_v00_mik.OX359190.1G586.1	0	0	0	0	0	3	0	0	10	0	2.6	0	-
Choren_v00_mik.OX359190.1G587.1	37	5	44	15	2	0	0	0	15	10	5	20.6	TIGD2	Tigger transpable element-derived protein 2
Choren_v00_mik.OX359190.1G589.1	0	0	0	0	0	5	0	0	0	0	1	0	-
Choren_v00_mik.OX359190.1G588.1	0	0	0	0	0	7	3	3	35	21	13.8	0	-
Choren_v00_mik.OX359190.1G590.1	0	0	0	0	0	2	0	0	0	0	0.4	0	-
Choren_v00_mik.OX359190.1G591.1	0	0	0	0	6	0	0	0	6	5	2.2	1.2	YTX2	Transpon TX1 uncharacterized 149 kDa protein
Choren_v00_mik.OX359190.1G592.1	22	0	0	17	0	0	0	42	0	0	8.4	7.8	LORF2	LINE-1 retrotranspable element ORF2 protein
Choren_v00_mik.OX359190.1G593.1	0	0	0	0	0	0	0	0	0	0	0	0	-
Choren_v00_mik.OX359190.1G594.1	0	0	0	0	0	0	0	0	0	3	0.6	0	TIGD4	Tigger transpable element-derived protein 4
Choren_v00_mik.OX359190.1G595.1	0	0	0	0	0	1	0	0	2	0	0.6	0	-
Choren_v00_mik.OX359190.1G596.1	0	0	5	2	0	0	0	0	3	0	0.6	1.4	-
Choren_v00_mik.OX359190.1G597.1	0	0	4	0	0	0	7	0	0	0	1.4	0.8	-
Choren_v00_mik.OX359190.1G598.1	0	4	0	0	0	0	5	0	0	0	1	0.8	RAG1	V(D)J recombination-activating protein 1
Choren_v00_mik.OX359190.1G599.1	0	0	1	1	2	1	2	193	9	98	60.6	0.8	-
Choren_v00_mik.OX359190.1G600.1	0	0	0	0	0	0	0	21	3	13	7.4	0	-
Choren_v00_mik.OX359190.1G601.1	1	2	0	2	0	0	0	0	5	0	1	1	PIF1	ATP-dependent DNA helicase PIF1
Choren_v00_mik.OX359190.1G602.1	0	0	0	0	0	0	0	0	0	0	0	0	-
Choren_v00_mik.OX359190.1G603.1	0	0	0	0	0	0	0	0	0	0	0	0	-
Choren_v00_mik.OX359190.1G604.1	5	0	5	8	0	2	0	0	7	0	1.8	3.6	-
Choren_v00_mik.OX359190.1G605.1	215	119	5	31	26	1	47	2	315	17	76.4	79.2
Choren_v00_mik.OX359190.1G606.1	0	0	0	0	0	0	0	0	0	0	0	0	NIPBL	Nipped-B-like protein	YES
Choren_v00_mik.OX359190.1G607.1	0	0	0	0	0	0	0	0	0	0	0	0	-
Choren_v00_mik.OX359190.1G608.1	30	20	3	0	151	17	6	21	22	13	15.8	40.8
Choren_v00_mik.OX359190.1G609.1	3	0	0	0	0	8	0	0	2	32	8.4	0.6	-
Choren_v00_mik.OX359190.1G610.1	8	1	11	12	0	12	2	2	28	0	8.8	6.4	-
Choren_v00_mik.OX359190.1G612.1	0	0	0	0	0	0	0	0	0	0	0	0	TIGD2	Tigger transpable element-derived protein 2
Choren_v00_mik.OX359190.1G611.1	0	0	0	0	0	0	0	0	0	0	0	0	-
Choren_v00_mik.OX359190.1G614.1	6857	2135	2289	1658	1589	1008	176	798	1516	1389	977.4	2905.6	DNAS1	Deoxyribonuclease-1
Choren_v00_mik.OX359190.1G613.1	19873	6228	7352	7896	7062	6051	2971	2699	10130	4843	5338.8	9682.2	SODM	Superoxide dismutase
Choren_v00_mik.OX359190.1G615.1	25205	5606	9764	9711	10711	7603	3218	18344	16349	19489	13000.6	12199.4	SKP1	S-phase kinase-associated protein 1	YES
Choren_v00_mik.OX359190.1G615.2	413	341	319	366	748	1004	183	174	757	227	469	437.4	SKP1	S-phase kinase-associated protein 1	YES
Choren_v00_mik.OX359190.1G616.1	0	6	0	0	0	7	0	0	0	0	1.4	1.2	CXXC1	CXXC-type zinc finger protein 1
Choren_v00_mik.OX359190.1G616.2	0	0	0	0	0	0	0	0	0	0	0	0
Choren_v00_mik.OX359190.1G617.1	0	0	0	0	0	0	0	0	0	0	0	0	-
Choren_v00_mik.OX359190.1G618.1	0	0	16	2	0	0	3	5	0	0	1.6	3.6	VF030	IIV3Uncharacterized protein 106R
Choren_v00_mik.OX359190.1G619.1	0	0	0	0	0	0	0	0	0	0	0	0	-
Choren_v00_mik.OX359190.1G620.1	0	0	0	0	0	0	4	0	30	0	6.8	0	-
Choren_v00_mik.OX359190.1G621.1	0	0	0	0	0	0	0	12	6	0	3.6	0	-
Choren_v00_mik.OX359190.1G622.1	0	0	0	0	0	0	0	0	0	0	0	0	-
Choren_v00_mik.OX359190.1G623.1	0	0	0	0	0	0	0	0	0	0	0	0	-
Choren_v00_mik.OX359190.1G624.1	0	0	0	0	0	0	0	0	0	0	0	0	-
Choren_v00_mik.OX359190.1G625.1	0	0	0	0	0	0	0	0	0	0	0	0	PIF1	ATP-dependent DNA helicase PIF1
Choren_v00_mik.OX359190.1G626.1	18	0	0	0	0	0	0	0	0	7	1.4	3.6	-
Choren_v00_mik.OX359190.1G627.1	0	0	0	0	0	0	0	0	0	0	0	0	-
Choren_v00_mik.OX359190.1G628.1	0	0	0	0	0	0	0	0	0	0	0	0	-
Choren_v00_mik.OX359190.1G629.1	0	0	0	0	0	0	0	0	0	0	0	0	-
Choren_v00_mik.OX359190.1G630.1	2236	562	52	732	106	129	20	23	61	356	117.8	737.6	-
Choren_v00_mik.OX359190.1G631.1	0	86	0	0	0	0	0	0	31	187	43.6	17.2	TIGD4	Tigger transpable element-derived protein 4
Choren_v00_mik.OX359190.1G632.1	0	0	0	0	0	0	0	0	0	0	0	0	-
Choren_v00_mik.OX359190.1G633.1	0	0	0	0	0	0	0	4	0	0	0.8	0	PIF1	ATP-dependent DNA helicase PIF1
Choren_v00_mik.OX359190.1G634.1	74	0	0	0	0	0	0	0	0	0	0	14.8	POL3	Retrovirus-related Pol polyprotein from transpon 17.6
Choren_v00_mik.OX359190.1G635.1	0	0	0	0	0	0	0	0	0	0	0	0	-
Choren_v00_mik.OX359190.1G636.1	0	0	0	0	0	0	0	0	0	0	0	0	-
Choren_v00_mik.OX359190.1G637.1	3	0	0	0	0	17	0	0	0	0	3.4	0.6	-
Choren_v00_mik.OX359190.1G638.1	0	0	0	0	0	0	0	0	0	0	0	0	-
Choren_v00_mik.OX359190.1G639.1	0	0	0	0	0	0	0	0	0	0	0	0	-
Choren_v00_mik.OX359190.1G640.1	0	0	0	0	0	0	0	0	0	14	2.8	0	-
Choren_v00_mik.OX359190.1G641.1	0	0	0	0	0	0	0	0	0	0	0	0	-
Choren_v00_mik.OX359190.1G642.1	0	0	0	0	0	0	0	0	8	0	1.6	0	-
Choren_v00_mik.OX359190.1G644.1	2	0	0	0	0	0	0	0	0	0	0	0.4	YRD6	Uncharacterized protein K02A2.6
Choren_v00_mik.OX359190.1G645.1	0	0	0	0	0	0	0	0	0	0	0	0	POL2	Retrovirus-related Pol polyprotein from transpon 297
Choren_v00_mik.OX359190.1G643.1	18	0	0	10	16	0	0	0	0	0	0	8.8	-
Choren_v00_mik.OX359190.1G646.1	0	0	0	0	0	0	0	0	8	0	1.6	0	-
Choren_v00_mik.OX359190.1G647.1	0	0	0	0	0	0	0	0	0	0	0	0	-
Choren_v00_mik.OX359190.1G648.1	0	0	0	0	0	0	0	0	0	0	0	0	-
Choren_v00_mik.OX359190.1G649.1	0	0	0	0	0	0	0	4	0	6	2	0	PIF1	ATP-dependent DNA helicase PIF1
Choren_v00_mik.OX359190.1G650.1	0	0	0	0	0	0	0	0	0	0	0	0	-
Choren_v00_mik.OX359190.1G651.1	0	0	0	0	0	0	0	0	0	0	0	0	-
Choren_v00_mik.OX359190.1G652.1	0	0	0	0	0	0	0	0	10	0	2	0	-
Choren_v00_mik.OX359190.1G653.1	0	0	0	7	0	9	0	7	12	0	5.6	1.4	-
Choren_v00_mik.OX359190.1G654.1	0	0	0	0	0	0	0	0	0	0	0	0	-
Choren_v00_mik.OX359190.1G655.1	0	0	0	0	0	0	0	0	0	0	0	0	-
Choren_v00_mik.OX359190.1G656.1	0	0	0	0	3	0	0	0	9	0	1.8	0.6	VF030	IIV6Uncharacterized protein 030L
Choren_v00_mik.OX359190.1G657.1	0	0	0	0	0	0	0	0	4	0	0.8	0	POL5	Retrovirus-related Pol polyprotein from transpon opus
Choren_v00_mik.OX359190.1G658.1	0	0	0	0	0	0	0	0	0	0	0	0	-
Choren_v00_mik.OX359190.1G659.1	0	0	0	0	0	0	0	0	0	0	0	0	-
Choren_v00_mik.OX359190.1G660.1	0	0	0	0	0	0	0	0	0	0	0	0	-
Choren_v00_mik.OX359190.1G661.1	0	0	0	0	0	0	0	0	4	0	0.8	0	-
Choren_v00_mik.OX359190.1G662.1	0	0	0	0	0	11	0	0	19	0	6	0	POL4	Retrovirus-related Pol polyprotein from transpon 412
Choren_v00_mik.OX359190.1G663.1	0	0	0	0	0	9	5	0	18	0	6.4	0	-
Choren_v00_mik.OX359190.1G664.1	0	0	0	0	0	0	0	0	0	0	0	0	-
Choren_v00_mik.OX359190.1G665.1	0	0	0	0	0	0	0	0	0	0	0	0	-
Choren_v00_mik.OX359190.1G666.1	0	0	0	0	0	3	0	5	17	0	5	0	-
Choren_v00_mik.OX359190.1G668.1	106	32	30	162	41	12	77	787	41	68	197	74.2	ZMYM1	Zinc finger MYM-type protein 1
Choren_v00_mik.OX359190.1G667.1	8	0	0	0	0	0	6	0	6	0	2.4	1.6	VF030	IIV3Uncharacterized protein 106R
Choren_v00_mik.OX359190.1G669.1	0	0	0	0	0	15	0	0	12	0	5.4	0	VF030	IIV6Uncharacterized protein 030L
Choren_v00_mik.OX359190.1G670.1	3	0	1	0	0	0	0	1	0	0	0.2	0.8	-
Choren_v00_mik.OX359190.1G671.1	0	0	0	17	0	0	52	0	0	25	15.4	3.4	YSM6	Putative uncharacterized transpon-derived protein F52C9.6
Choren_v00_mik.OX359190.1G672.1	0	0	0	0	0	0	0	0	0	0	0	0	-
Choren_v00_mik.OX359190.1G673.1	15	5	0	0	0	0	0	0	0	0	0	4	-
Choren_v00_mik.OX359190.1G676.1	109	36	105	4	58	124	22	37	84	0	53.4	62.4	RTBS	Probable RNA-directed DNA polymerase from transpon BS
Choren_v00_mik.OX359190.1G674.1	6	0	1	0	1	3	0	0	5	0	1.6	1.6	-
Choren_v00_mik.OX359190.1G675.1	0	0	0	0	0	6	0	0	12	0	3.6	0	-
Choren_v00_mik.OX359190.1G677.1	0	0	0	0	0	0	4	0	27	0	6.2	0	PIF1	ATP-dependent DNA helicase PIF1
Choren_v00_mik.OX359190.1G678.1	0	0	0	0	0	0	0	0	8	10	3.6	0	-
Choren_v00_mik.OX359190.1G679.1	0	0	0	0	0	0	0	0	11	0	2.2	0	-
Choren_v00_mik.OX359190.1G680.1	80	3	5	0	2	0	7	0	0	36	8.6	18	-
Choren_v00_mik.OX359190.1G681.1	15	0	6	0	6	18	0	0	29	0	9.4	5.4	-
Choren_v00_mik.OX359190.1G682.1	0	0	0	0	0	0	9	0	0	0	1.8	0	-
Choren_v00_mik.OX359190.1G683.1	15	7	12	0	3	14	0	0	2	0	3.2	7.4	-
Choren_v00_mik.OX359190.1G684.1	0	0	0	0	0	0	0	0	0	0	0	0	-
Choren_v00_mik.OX359190.1G685.1	0	0	0	0	0	0	0	0	7	0	1.4	0
Choren_v00_mik.OX359190.1G687.1	70	0	80	12	0	7	0	26	46	98	35.4	32.4	LORF2	LINE-1 retrotranspable element ORF2 protein
Choren_v00_mik.OX359190.1G686.1	17	0	85	0	0	0	0	0	0	27	5.4	20.4	CFDP2	Craniofacial development protein 2
Choren_v00_mik.OX359190.1G688.1	0	0	0	0	0	0	0	0	9	0	1.8	0	POL4	Retrovirus-related Pol polyprotein from transpon 412
Choren_v00_mik.OX359190.1G690.1	8	0	4	0	0	0	0	0	0	0	0	2.4	POL4	Retrovirus-related Pol polyprotein from transpon 412
Choren_v00_mik.OX359190.1G689.1	28	0	5	2	3	3	0	0	0	6	1.8	7.6	POL3	Retrovirus-related Pol polyprotein from transpon 17.6
Choren_v00_mik.OX359190.1G691.1	0	0	0	0	0	0	0	0	0	0	0	0
Choren_v00_mik.OX359190.1G692.1	9	3	0	0	0	0	1	0	7	0	1.6	2.4	-
Choren_v00_mik.OX359190.1G693.1	63	4	29	3	0	11	0	0	9	0	4	19.8	-
Choren_v00_mik.OX359190.1G694.1	0	0	0	0	0	0	0	0	3	0	0.6	0	ZBED5	Zinc finger BED domain-containing protein 5	YES
Choren_v00_mik.OX359190.1G696.1	20	6	21	3	15	60	0	10	29	6	21	13	-
Choren_v00_mik.OX359190.1G695.1	0	0	0	0	0	0	0	0	0	0	0	0	-
Choren_v00_mik.OX359190.1G698.1	6	0	3	0	0	6	0	0	12	0	3.6	1.8	-
Choren_v00_mik.OX359190.1G697.1	14	12	11	0	0	2	0	13	8	0	4.6	7.4	-
Choren_v00_mik.OX359190.1G699.1	0	0	0	0	0	24	0	0	0	0	4.8	0	-
Choren_v00_mik.OX359190.1G702.1	0	0	11	0	0	5	0	0	0	0	1	2.2	-
Choren_v00_mik.OX359190.1G700.1	0	0	0	2	0	0	0	0	0	0	0	0.4	-
Choren_v00_mik.OX359190.1G701.1	25	13	12	15	0	0	9	0	19	4	6.4	13	PIF1	ATP-dependent DNA helicase PIF1
Choren_v00_mik.OX359190.1G703.1	24	4	0	0	4	0	5	0	0	0	1	6.4	-
Choren_v00_mik.OX359190.1G704.1	66	0	0	9	22	0	0	0	16	27	8.6	19.4	-
Choren_v00_mik.OX359190.1G705.1	7	0	0	4	0	0	0	0	0	9	1.8	2.2	-
Choren_v00_mik.OX359190.1G706.1	0	0	0	0	0	0	0	0	0	0	0	0	-
Choren_v00_mik.OX359190.1G707.1	0	6	0	0	0	0	0	0	0	0	0	1.2	-
Choren_v00_mik.OX359190.1G708.1	43	22	46	0	40	7	0	14	0	51	14.4	30.2	-
Choren_v00_mik.OX359190.1G709.1	25	4	7	4	56	15	2	6	24	15	12.4	19.2	-
Choren_v00_mik.OX359190.1G710.1	0	0	9	5	0	0	0	0	0	0	0	2.8	-
Choren_v00_mik.OX359190.1G711.1	3	0	0	3	15	0	0	16	0	5	4.2	4.2	-
Choren_v00_mik.OX359190.1G712.1	28	0	0	6	9	0	0	0	0	4	0.8	8.6	-
Choren_v00_mik.OX359190.1G714.1	0	0	0	0	0	0	0	0	0	0	0	0	-
Choren_v00_mik.OX359190.1G713.1	0	0	0	0	0	0	0	0	0	0	0	0	-
Choren_v00_mik.OX359190.1G715.1	0	0	0	8	11	6	0	8	0	0	2.8	3.8	IRAK1	Interleukin-1 receptor-associated kinase 1
Choren_v00_mik.OX359190.1G716.1	0	12	0	0	6	3	0	0	0	0	0.6	3.6	TIGD4	Tigger transpable element-derived protein 4
Choren_v00_mik.OX359190.1G717.1	921	147	1512	329	1539	250	26	37	65	451	165.8	889.6	-
Choren_v00_mik.OX359190.1G719.1	20641	4010	8563	4688	7942	3373	1252	2151	4007	4525	3061.6	9168.8	-
Choren_v00_mik.OX359190.1G718.1	40	98	508	428	925	81	33	96	0	137	69.4	399.8	HIBCH	3-hydroxyisobutyryl-CoA hydrolase, mitochondrial
Choren_v00_mik.OX359190.1G721.1	2142	69	1343	803	1237	840	488	498	2056	1850	1146.4	1118.8	ASCC2	Activating signal cointegor 1 complex subunit 2	YES
Choren_v00_mik.OX359190.1G721.2	3977	90	1188	1029	903	1304	482	446	1502	1360	1018.8	1437.4
Choren_v00_mik.OX359190.1G720.1	1	10	2	1	2	0	0	4	4	1	1.8	3.2	-
Choren_v00_mik.OX359190.1G722.1	28	6	8	0	0	0	0	0	15	9	4.8	8.4	POL3	Retrovirus-related Pol polyprotein from transpon 17.6
Choren_v00_mik.OX359190.1G723.1	0	0	0	0	0	0	0	0	0	0	0	0	-
Choren_v00_mik.OX359190.1G725.1	69	169	231	28	32	169	131	17	9	146	94.4	105.8	-
Choren_v00_mik.OX359190.1G724.1	0	1	1	0	0	1	1	0	1	1	0.8	0.4	-
Choren_v00_mik.OX359190.1G726.1	2	7	0	0	0	3	0	0	0	0	0.6	1.8	PGBD3	PiggyBac transpable element-derived protein 3
Choren_v00_mik.OX359190.1G727.1	0	0	0	0	0	0	0	0	0	0	0	0	-
Choren_v00_mik.OX359190.1G728.1	0	0	0	0	0	0	0	0	0	0	0	0	-
Choren_v00_mik.OX359190.1G729.1	0	0	0	0	0	0	0	0	0	0	0	0	-
Choren_v00_mik.OX359190.1G730.1	0	0	0	0	0	10	0	0	0	0	2	0	-
Choren_v00_mik.OX359190.1G731.1	0	0	0	0	0	0	0	0	0	0	0	0	-
Choren_v00_mik.OX359190.1G732.1	0	0	0	0	0	0	0	0	0	0	0	0	POGZ	Pogo transpable element with ZNF domain
Choren_v00_mik.OX359190.1G733.1	0	0	0	0	0	0	0	0	0	0	0	0	-
Choren_v00_mik.OX359190.1G734.1	13	0	0	0	4	0	0	19	0	10	5.8	3.4	PAR14	Protein mono-ADP-ribyltransferase PARP14
Choren_v00_mik.OX359190.1G735.1	40	18	8	3	2	10	3	0	0	7	4	14.2	-
Choren_v00_mik.OX359190.1G736.1	0	0	5	0	0	3	0	2	10	4	3.8	1	-
Choren_v00_mik.OX359190.1G738.1	41	0	111	11	0	136	13	0	0	6	31	32.6
Choren_v00_mik.OX359190.1G737.1	0	0	1	1	0	1	0	0	0	0	0.2	0.4	-
Choren_v00_mik.OX359190.1G739.1	0	0	0	0	0	0	0	0	0	0	0	0
Choren_v00_mik.OX359190.1G740.1	0	0	0	0	0	0	0	0	0	0	0	0
Choren_v00_mik.OX359190.1G741.1	4	0	10	14	11	9	0	0	11	0	4	7.8
Choren_v00_mik.OX359190.1G741.2	86	5	0	8	57	10	2	0	9	12	6.6	31.2
Choren_v00_mik.OX359190.1G742.1	112	0	0	0	34	0	0	14	19	0	6.6	29.2	VF030	IIV6Uncharacterized protein 030L
											161.448	233.121
											2.20803	2.36758

## Sheet: B_SDR_chromosome11_Creniformis
	Males (TPMs)					Females (TPMs)					Average Expression
Gene_ID	Ch21_21_M	Ch5_20_M	ChNap22_20_M	ChNap22_24_M	ChNap22_22_M	ChNap22_23_F	Ch4_20_F	ChNap22_6_F	Ch7_20_F	ChNap22_10_F	AVERAGE_M	AVERAGE_F	Gene_abbreviation	Gene_Description	Known_sex_function
Choren_v00_mik.OX359199.1G401.1	1086	135	77	217	725	4178	392	894	1007	649	448	1424	CP3A8	ACytochrome P450 3A8	YES
Choren_v00_mik.OX359199.1G403.1	255	209	11689	8090	10015	544	67	188	127	106	6051.6	206.4	PTPRD	Receptor-type tyrine-protein phphatase delta	YES
Choren_v00_mik.OX359199.1G406.2	18	16	14	63	33	200	89	114	84	126	28.8	122.6	DPYS	Dihydropyrimidinase	YES
Choren_v00_mik.OX359199.1G410.1	6172	2587	2829	3359	5093	1243	4243	1447	1351	8462	4008	3349.2	VPS50	Syndetin
Choren_v00_mik.OX359199.1G411.1	224	136	188	120	233	1547	132	298	323	294	180.2	518.8	KIN15	Receptor-like tyrine-protein kinase kin-15	YES
Choren_v00_mik.OX359199.1G412.1	2896	856	6987	8136	8898	15525	3111	4259	2574	4371	5554.6	5968	CDK13	Cyclin-dependent kinase 13	YES
Choren_v00_mik.OX359199.1G415.1	204	0	0	0	7	67	0	0	5	9	42.2	16.2	GARS	Glycine--tRNA ligase
Choren_v00_mik.OX359199.1G417.1	80	39	71	103	162	428	109	173	144	38	91	178.4	GARS	Glycine--tRNA ligase
Choren_v00_mik.OX359199.1G420.1	0	0	0	0	0	0	0	2	0	0	0	0.4	THAP4	Peroxynitrite isomerase THAP4	YES
Choren_v00_mik.OX359199.1G429.1	0	9	18	44	52	509	10	8	6	13	24.6	109.2	RTJK	RNA-directed DNA polymerase from mobile element jockey	YES
Choren_v00_mik.OX359199.1G431.1	8	0	0	0	4	49	0	21	0	0	2.4	14	RTJK	RNA-directed DNA polymerase from mobile element jockey
Choren_v00_mik.OX359199.1G437.1	63	82	103	464	13	52	253	13	90	532	145	188	RTJK	RNA-directed DNA polymerase from mobile element jockey
Choren_v00_mik.OX359199.1G449.1	26	28	4	39	49	295	21	30	40	284	29.2	134	PO21	Retrovirus-related Pol polyprotein from type-1 retrotranspable element R2 (Fragment)
Choren_v00_mik.OX359199.1G454.1	1	0	0	0	0	5	0	0	0	0	0.2	1	RTBS	Probable RNA-directed DNA polymerase from transpon BS	YES
Choren_v00_mik.OX359199.1G455.1	0	0	0	0	0	0	0	0	0	0	0	0	POL	Gag-Pro-Pol polyprotein	YES
Choren_v00_mik.OX359199.1G466.1	4	0	0	0	0	0	0	0	0	0	0.8	0	VF030	Uncharacterized protein 106R
Choren_v00_mik.OX359199.1G469.1	0	0	0	0	77	0	0	3	8	0	15.4	2.2	PHF2	Lysine-specific demethylase phf2
Choren_v00_mik.OX359199.1G470.1	0	0	0	0	8	0	0	0	0	0	1.6	0	GIN1	Gypsy retrotranspon integrase-like protein 1	YES
Choren_v00_mik.OX359199.1G473.1	12	0	14	24	29	64	3	18	0	13	15.8	19.6	RTBS	Probable RNA-directed DNA polymerase from transpon BS
Choren_v00_mik.OX359199.1G476.1	0	0	0	0	0	0	0	0	0	0	0	0	PAR14	Protein mono-ADP-ribyltransferase PARP14
Choren_v00_mik.OX359199.1G482.1	95	0	26	0	0	22	0	0	159	0	24.2	36.2	MYO1A	Unconventional myin-Ia
Choren_v00_mik.OX359199.1G486.1	1	1	2	1	3	1	2	1	0	1	1.6	1	ECM29	Proteasome-associated protein ECM29 homolog
Choren_v00_mik.OX359199.1G487.1	208	38	0	158	164	3	72	42	27	3	113.6	29.4	PTPRE	Receptor-type tyrine-protein phphatase epsilon
Choren_v00_mik.OX359199.1G492.1	0	0	0	0	0	0	0	0	0	0	0	0	SCND3	SCAN domain-containing protein 3
Choren_v00_mik.OX359199.1G496.1	0	0	0	0	0	0	0	0	0	341	0	68.2	HDAC4	RATHistone deacetylase 4
Choren_v00_mik.OX359199.1G497.1	0	0	0	416	2	0	35	0	0	0	83.6	7	AF10	Protein AF-10	YES
Choren_v00_mik.OX359199.1G498.1	6764	4007	10671	16752	16827	29502	7528	8038	9849	9161	11004.2	12815.6	PSD11	26S proteasome non-ATPase regulatory subunit 11
Choren_v00_mik.OX359199.1G500.1	10190	3591	6169	3825	1671	1174	394	17658	4313	3276	4436.6	6410.2	CENPE	Centromere-associated protein E
Choren_v00_mik.OX359199.1G505.1	1133	543	4500	2673	5100	4622	1111	1470	1083	1467	2789.8	1950.6	CC148	Coiled-coil domain-containing protein 148

## Sheet: C_SDR_chromosome5_Olobularis
	Males (TPMs)					Females (TPMs)				Average Expression
Gene_ID	Olob1_M	Olob2_M	Olob5_nap_M	Osc3_M	Osc5_M	Osc_10_nap_F	Osc_11_nap_F	Osc_13_nap_M	Osc_4_nap_F	AVERAGE_M	AVERAGE_F	Gene_abbreviation	Gene_description	Known_sex_function
Osclob_v00_mik.OX382154.1G594.1	0	0	0	0	0	0	0	0	0	0	0	TIGD6	Tigger transpable element-derived protein 6	YES
Osclob_v00_mik.OX382154.1G595.1	4	8	13	4	2	7	14	2	7	6.2	7.5	WRN	ATP-dependent helicase wrn-1	YES
Osclob_v00_mik.OX382154.1G599.1	0	0	0	0	0	0	0	0	9	0	2.25	-
Osclob_v00_mik.OX382154.1G600.1	0	0	0	6	0	0	0	0	0	1.2	0	-
Osclob_v00_mik.OX382154.1G604.1	0	0	0	0	2	0	0	0	0	0.4	0	M3K7	Mitogen-activated protein kinase kinase kinase 7
Osclob_v00_mik.OX382154.1G606.1	3	0	0	0	0	0	0	0	0	0.6	0	P52K	52 kDa repressor of the inhibitor of the protein kinase
Osclob_v00_mik.OX382154.1G608.1	0	0	0	4	44	11	0	0	0	9.6	2.75	POL4	Retrovirus-related Pol polyprotein from transpon 412
Osclob_v00_mik.OX382154.1G612.1	0	0	0	0	0	4	0	0	0	0	1	-
Osclob_v00_mik.OX382154.1G615.1	0	0	0	0	6	0	0	0	0	1.2	0	-
Osclob_v00_mik.OX382154.1G616.1	49	0	32	81	0	0	0	51	0	32.4	12.75	-
Osclob_v00_mik.OX382154.1G618.1	0	0	0	13	0	0	0	0	0	2.6	0	THAP9	DNA transpase THAP9
Osclob_v00_mik.OX382154.1G622.1	80	0	0	45	0	0	0	0	0	25	0	-
Osclob_v00_mik.OX382154.1G624.1	0	0	0	10	0	0	0	0	0	2	0	PELET	Transpable element P transpase
Osclob_v00_mik.OX382154.1G628.1	0	0	0	0	0	0	0	0	0	0	0	CENPB	Major centromere autoantigen B	YES
Osclob_v00_mik.OX382154.1G630.1	18	0	9	21	0	0	0	23	0	9.6	5.75	-
Osclob_v00_mik.OX382154.1G631.1	0	0	0	0	0	0	0	0	0	0	0	G2E3	G2/M phase-specific E3 ubiquitin-protein ligase	YES
Osclob_v00_mik.OX382154.1G632.1	0	0	0	0	0	0	0	0	0	0	0	WRN	Bifunctional 3'-5' exonuclease/ATP-dependent helicase WRN	YES
Osclob_v00_mik.OX382154.1G636.1	8	0	0	18	0	0	0	0	0	5.2	0	PIF1	ATP-dependent DNA helicase PIF1	YES
Osclob_v00_mik.OX382154.1G639.1	80	0	0	74	0	0	0	0	0	30.8	0	-
Osclob_v00_mik.OX382154.1G640.1	0	0	0	5	0	0	0	0	0	1	0	-
Osclob_v00_mik.OX382154.1G644.1	7	0	0	0	0	0	0	0	0	1.4	0	-
Osclob_v00_mik.OX382154.1G644.1	7	0	0	0	0	0	0	0	0	1.4	0	-		YES
Osclob_v00_mik.OX382154.1G645.1	0	0	0	0	31	0	0	0	0	6.2	0	-
Osclob_v00_mik.OX382154.1G646.1	61	0	0	210	28	16	0	15	39	59.8	17.5	POL	MGag-Pol polyprotein
Osclob_v00_mik.OX382154.1G647.1	127	0	13	185	48	32	6	82	17	74.6	34.25	POL2	Retrovirus-related Pol polyprotein from transpon 297
Osclob_v00_mik.OX382154.1G652.1	20	0	0	0	0	0	0	0	0	4	0	-
Osclob_v00_mik.OX382154.1G654.1	0	0	0	0	0	0	0	0	0	0	0	VF030	IIV6Uncharacterized protein 030L
Osclob_v00_mik.OX382154.1G658.1	0	0	0	0	4	0	0	0	0	0.8	0	PELET	Transpable element P transpase	YES
Osclob_v00_mik.OX382154.1G660.1	0	0	0	0	9	0	0	0	0	1.8	0	YRD6	Uncharacterized protein K02A2.6
Osclob_v00_mik.OX382154.1G660.1	0	0	0	0	9	0	0	0	0	1.8	0	YRD6	Uncharacterized protein K02A2.6	YES
Osclob_v00_mik.OX382154.1G664.1	0	0	0	0	0	6	0	0	0	0	1.5	PIF1	ATP-dependent DNA helicase PIF1
Osclob_v00_mik.OX382154.1G666.1	13	17	4	30	7	9	13	8	0	14.2	7.5	POL4	Retrovirus-related Pol polyprotein from transpon 412
Osclob_v00_mik.OX382154.1G666.1	13	17	4	30	7	9	13	8	0	14.2	7.5	POL4	Retrovirus-related Pol polyprotein from transpon 412	YES
Osclob_v00_mik.OX382154.1G667.1	0	0	0	0	0	0	6	0	0	0	1.5	-
Osclob_v00_mik.OX382154.1G674.1	103	26	0	27	96	0	85	4	93	50.4	45.5	DYH10	Dynein axonemal heavy chain 10	YES
Osclob_v00_mik.OX382154.1G678.1	1	0	0	12	28	0	0	0	0	8.2	0	DAPK1	Death-associated protein kinase 1	YES
Osclob_v00_mik.OX382154.1G694.1	83	16	0	66	24	36	0	32	15	37.8	20.75	FGFR	Fibroblast growth factor receptor	YES
