# Supplementary material for: Sponge genomes reveal a pre-metazoan origin of the sex determination toolkit and sex chromosomes
Source: Research Square preprint supplement (doi:10.21203/rs.3.rs-8554461/v1), 2026-02-12
Supplement: Supplementary file 7 [file 4aca2b8619357c95b58c6a29.xlsx]

## Sheet: A. Sex_loci_genes_genomes
Oscarella_lobularis	Chondrosia_reniformis	Petrosia_ficiformis	Phakellia ventilabrum	Axinella damicornis	Halichondria panicea
Osclob_v00_mik.OX382150.1G1727.1	Choren_v00_mik.OX359194.1G410.1	Petfic_v00_mik.OX345638.1G878	g5323	g2430.t1	Hpan_g922.t2
Osclob_v00_mik.OX382167.1G208.1	Choren_v00_mik.OX359197.1G650.1	Petfic_v00_mik.OX345645.1G610	g5322	g6706.t1	Hpan_g15577.t1
Osclob_v00_mik.OX382153.1G308.1	Choren_v00_mik.OX359200.1G527.1	Petfic_v00_mik.OX345651.1G362	g5324	g3745.t2	Hpan_g11724.t2
Osclob_v00_mik.OX382153.1G301.1	Choren_v00_mik.OX359189.1G1487.2	Petfic_v00_mik.OX345652.1G517	g5324	g16395.t1	Hpan_g11724.t1
Osclob_v00_mik.OX382152.1G291.1	Choren_v00_mik.OX359192.1G235.1	Petfic_v00_mik.OX345644.1G90	g1515	g16391.t1	Hpan_g11718.t1
Osclob_v00_mik.OX382169.1G367.1	Choren_v00_mik.OX359192.1G577.1	Petfic_v00_mik.OX345639.1G1220	g14659	g575.t1	Hpan_g13865.t1
Osclob_v00_mik.OX382163.1G461.1	Choren_v00_mik.OX359195.1G890.1	Petfic_v00_mik.OX345638.1G710	g7603	g9876.t1	Hpan_g102.t1
Osclob_v00_mik.OX382166.1G72.1	Choren_v00_mik.OX359194.1G562.2	Petfic_v00_mik.OX345639.1G41	g6769	g4207.t1	Hpan_g3110.t1
Osclob_v00_mik.OX382150.1G1740.1	Choren_v00_mik.OX359190.1G1097.1	Petfic_v00_mik.OX345653.1G360	g9191	g11346.t1	Hpan_g14187.t1
Osclob_v00_mik.OX382150.1G849.1	Choren_v00_mik.OX359193.1G1313.1	Petfic_v00_mik.OX345636.1G3983	g9191	g6329.t1	Hpan_g14200.t1
Osclob_v00_mik.OX382168.1G367.2	Choren_v00_mik.OX359194.1G561.1	Petfic_v00_mik.OX345643.1G179	g9191	g6324.t1	Hpan_g11370.t1
Osclob_v00_mik.OX382157.1G80.1	Choren_v00_mik.OX359196.1G218.1	Petfic_v00_mik.OX345642.1G553	g16396	g16180.t1	Hpan_g12281.t1
Osclob_v00_mik.OX382153.1G887.1	Choren_v00_mik.OX359196.1G1139.1	Petfic_v00_mik.OX345646.1G202	g2199	g4859.t1	Hpan_g763.t1
Osclob_v00_mik.OX382158.1G402.1	Choren_v00_mik.OX359201.1G371.1	Petfic_v00_mik.OX345636.1G6575	g999	g5425.t1	Hpan_g3223.t1
Osclob_v00_mik.OX382165.1G123.1	Choren_v00_mik.OX359201.1G463.1	Petfic_v00_mik.OX345645.1G456	g10	g4144.t1	Hpan_g4421.t1
Osclob_v00_mik.OX382163.1G489.1	Choren_v00_mik.OX359192.1G318.1	Petfic_v00_mik.OX345640.1G477	g977	g16814.t2	Hpan_g2956.t1
Osclob_v00_mik.OX382154.1G556.2	Choren_v00_mik.OX359189.1G963.1	Petfic_v00_mik.OX345650.1G289	g11121	g12523.t1	Hpan_g12250.t2
Osclob_v00_mik.OX382164.1G520.1	Choren_v00_mik.OX359191.1G405.1	Petfic_v00_mik.OX345646.1G580	g14877	g7575.t1	Hpan_g14852.t1
Osclob_v00_mik.OX382164.1G507.1	Choren_v00_mik.OX359196.1G410.1	Petfic_v00_mik.OX345651.1G255	g856	g15607.t1	Hpan_g3543.t1
Osclob_v00_mik.OX382152.1G308.1	Choren_v00_mik.OX359192.1G511.1	Petfic_v00_mik.OX345648.1G195	g12679	g2425.t1	Hpan_g9236.t1
Osclob_v00_mik.OX382151.1G663.1	Choren_v00_mik.OX359199.1G240.1	Petfic_v00_mik.OX345637.1G696	g2751	g10336.t1	Hpan_g1579.t1
Osclob_v00_mik.OX382161.1G540.1	Choren_v00_mik.OX359192.1G520.1	Petfic_v00_mik.OX345648.1G522	g12729	g16907.t1	Hpan_g1585.t1
Osclob_v00_mik.OX382161.1G541.1	Choren_v00_mik.OX359199.1G315.1	Petfic_v00_mik.OX345636.1G927	g2029	g10081.t1	Hpan_g4974.t1
Osclob_v00_mik.OX382161.1G223.1	Choren_v00_mik.OX359191.1G489.1	Petfic_v00_mik.OX345640.1G699	g6596	g1670.t1	Hpan_g735.t1
Osclob_v00_mik.OX382168.1G313.1	Choren_v00_mik.OX359192.1G988.1	Petfic_v00_mik.OX345638.1G661	g7905	g16375.t1	Hpan_g13781.t1
Osclob_v00_mik.OX382150.1G1893.1	Choren_v00_mik.OX359193.1G728.1	Petfic_v00_mik.OX345636.1G6360	g8457	g2733.t1	Hpan_g14316.t1
Osclob_v00_mik.OX382150.1G1900.1	Choren_v00_mik.OX359198.1G487.1	Petfic_v00_mik.OX345636.1G6012	g1396	g3631.t1	Hpan_g1042.t1
Osclob_v00_mik.OX382162.1G568.1	Choren_v00_mik.OX359198.1G181.1	Petfic_v00_mik.OX345650.1G274	g1232	g3631.t2	Hpan_g1057.t1
Osclob_v00_mik.OX382162.1G569.1	Choren_v00_mik.OX359196.1G230.1	Petfic_v00_mik.OX345645.1G167	g932	g15950.t1	Hpan_g968.t1
Osclob_v00_mik.OX382154.1G349.1	Choren_v00_mik.OX359200.1G113.2	Petfic_v00_mik.OX345638.1G598	g1170	g16098.t1	Hpan_g865.t1
Osclob_v00_mik.OX382154.1G348.1	Choren_v00_mik.OX359201.1G394.1	Petfic_v00_mik.OX345636.1G4401	g1295	g14843.t1	Hpan_g973.t1
Osclob_v00_mik.OX382165.1G456.1	Choren_v00_mik.OX359190.1G426.2	Petfic_v00_mik.OX345646.1G598	g832	g1900.t1	Hpan_g869.t1
Osclob_v00_mik.OX382166.1G510.1	Choren_v00_mik.OX359197.1G511.1	Petfic_v00_mik.OX345638.1G918	g15478	g1898.t1	Hpan_g856.t2
Osclob_v00_mik.OX382164.1G258.1	Choren_v00_mik.OX359190.1G983.1	Petfic_v00_mik.OX345637.1G925	g4867	g10365.t1	Hpan_g2194.t1
Osclob_v00_mik.OX382159.1G57.1	Choren_v00_mik.OX359191.1G625.1	Petfic_v00_mik.OX345636.1G4849	g16181	g2117.t1	Hpan_g12959.t1
Osclob_v00_mik.OX382164.1G382.1	Choren_v00_mik.OX359195.1G756.1	Petfic_v00_mik.OX345639.1G1387	g8496	g17220.t1	Hpan_g11119.t1
Osclob_v00_mik.OX382155.1G246.1	Choren_v00_mik.OX359193.1G886.1	Petfic_v00_mik.OX345639.1G1231	g8458	g10085.t1	Hpan_g12175.t1
Osclob_v00_mik.OX382152.1G293.1	Choren_v00_mik.OX359200.1G565.1	Petfic_v00_mik.OX345636.1G598	g6768	g2480.t1	Hpan_g5333.t1
Osclob_v00_mik.OX382158.1G629.1	Choren_v00_mik.OX359200.1G829.1	Petfic_v00_mik.OX345645.1G455	g9708	g9622.t1	Hpan_g4252.t1
Osclob_v00_mik.OX382154.1G444.1	Choren_v00_mik.OX359194.1G553.2	Petfic_v00_mik.OX345636.1G1166	g12970	g2423.t1	Hpan_g13059.t1
Osclob_v00_mik.OX382167.1G327.1	Choren_v00_mik.OX359194.1G515.1	Petfic_v00_mik.OX345636.1G2265	g6868	g6987.t1	Hpan_g6609.t1
Osclob_v00_mik.OX382155.1G127.2	Choren_v00_mik.OX359197.1G725.1	Petfic_v00_mik.OX345636.1G1211	g6868	g17327.t1	Hpan_g12160.t1
Osclob_v00_mik.OX382158.1G181.1	Choren_v00_mik.OX359192.1G644.1	Petfic_v00_mik.OX345638.1G750	g6646	g9025.t1	Hpan_g5815.t1
Osclob_v00_mik.OX382156.1G613.1	Choren_v00_mik.OX359193.1G1349.1	Petfic_v00_mik.OX345639.1G466	g6646	g6745.t1	Hpan_g11472.t1
Osclob_v00_mik.OX382160.1G346.1	Choren_v00_mik.OX359191.1G476.1	Petfic_v00_mik.OX345638.1G895	g6635	g5009.t1	Hpan_g7006.t1
Osclob_v00_mik.OX382168.1G184.1	Choren_v00_mik.OX359198.1G818.1	Petfic_v00_mik.OX345637.1G541	g15818	g7879.t1	Hpan_g14360.t1
Osclob_v00_mik.OX382168.1G131.1	Choren_v00_mik.OX359196.1G475.1	Petfic_v00_mik.OX345645.1G679	g6696	g10814.t1	Hpan_g10409.t1
Osclob_v00_mik.OX382168.1G132.1	Choren_v00_mik.OX359197.1G454.1	Petfic_v00_mik.OX345636.1G5866	g6642	g15885.t1	Hpan_g15546.t1
Osclob_v00_mik.OX382150.1G309.1	Choren_v00_mik.OX359194.1G78.1	Petfic_v00_mik.OX345649.1G131	g9610	g17400.t1	Hpan_g15543.t1
Osclob_v00_mik.OX382155.1G160.2	Choren_v00_mik.OX359197.1G452.1	Petfic_v00_mik.OX345650.1G99	g10300	g11408.t1	Hpan_g1974.t1
Osclob_v00_mik.OX382154.1G791.1	Choren_v00_mik.OX359195.1G867.1	Petfic_v00_mik.OX345646.1G724	g9609	g6858.t1	Hpan_g2118.t1
Osclob_v00_mik.OX382154.1G744.1	Choren_v00_mik.OX359189.1G1530.1	Petfic_v00_mik.OX345640.1G750	g15052	g6859.t3	Hpan_g14851.t1
Osclob_v00_mik.OX382161.1G226.1	Choren_v00_mik.OX359190.1G469.1	Petfic_v00_mik.OX345640.1G751	g15052	g11272.t1	Hpan_g12502.t1
Osclob_v00_mik.OX382169.1G433.1	Choren_v00_mik.OX359199.1G307.1	Petfic_v00_mik.OX345642.1G455	g15042	g10237.t1	Hpan_g3415.t2
Osclob_v00_mik.OX382158.1G182.1	Choren_v00_mik.OX359195.1G773.1	Petfic_v00_mik.OX345650.1G149	g15676	g10555.t1	Hpan_g14519.t1
Osclob_v00_mik.OX382154.1G555.1	Choren_v00_mik.OX359189.1G889.1	Petfic_v00_mik.OX345640.1G469	g15676	g7270.t1	Hpan_g790.t1
Osclob_v00_mik.OX382154.1G554.1	Choren_v00_mik.OX359195.1G21.1	Petfic_v00_mik.OX345647.1G377	g10303	g6113.t1	Hpan_g3617.t1
Osclob_v00_mik.OX382153.1G511.1	Choren_v00_mik.OX359191.1G619.1	Petfic_v00_mik.OX345636.1G5930	g10301	g6113.t2	Hpan_g3614.t1
Osclob_v00_mik.OX382154.1G660.1	Choren_v00_mik.OX359193.1G1152.1	Petfic_v00_mik.OX345636.1G5952	g10301	g11341.t1	Hpan_g3503.t1
Osclob_v00_mik.OX382169.1G391.1	Choren_v00_mik.OX359191.1G545.1	Petfic_v00_mik.OX345652.1G62	g13729	g11341.t2	Hpan_g3501.t1
Osclob_v00_mik.OX382150.1G1678.1	Choren_v00_mik.OX359199.1G995.1	Petfic_v00_mik.OX345650.1G751	g2195	g12580.t1	Hpan_g1064.t1
Osclob_v00_mik.OX382150.1G1676.1	Choren_v00_mik.OX359200.1G755.1	Petfic_v00_mik.OX345636.1G414	g14878	g12783.t1	Hpan_g13518.t2
Osclob_v00_mik.OX382150.1G1190.2	Choren_v00_mik.OX359190.1G922.1	Petfic_v00_mik.OX345640.1G806	g10	g12783.t2	Hpan_g4520.t1
Osclob_v00_mik.OX382163.1G404.1	Choren_v00_mik.OX359189.1G1494.1	Petfic_v00_mik.OX345636.1G6257	g977	g15786.t1	Hpan_g4891.t1
Osclob_v00_mik.OX382163.1G403.1	Choren_v00_mik.OX359194.1G969.1	Petfic_v00_mik.OX345636.1G2338	g2198	g7814.t2	Hpan_g13000.t1
Osclob_v00_mik.OX382154.1G852.1	Choren_v00_mik.OX359198.1G921.1	Petfic_v00_mik.OX345636.1G2244	g7600	g12279.t1	Hpan_g1488.t1
Osclob_v00_mik.OX382154.1G723.1	Choren_v00_mik.OX359190.1G1362.1	Petfic_v00_mik.OX345645.1G452	g13456	g11310.t1	Hpan_g1482.t1
Osclob_v00_mik.OX382154.1G847.1	Choren_v00_mik.OX359198.1G817.1	Petfic_v00_mik.OX345636.1G5652	g1000	g10250.t2	Hpan_g1487.t1
Osclob_v00_mik.OX382152.1G852.1	Choren_v00_mik.OX359192.1G620.1	Petfic_v00_mik.OX345644.1G241	g1397	g8079.t1	Hpan_g11480.t1
Osclob_v00_mik.OX382152.1G845.1	Choren_v00_mik.OX359197.1G645.1	Petfic_v00_mik.OX345645.1G410	g8971	g14396.t1	Hpan_g2701.t1
Osclob_v00_mik.OX382161.1G72.1	Choren_v00_mik.OX359202.1G1010.1	Petfic_v00_mik.OX345650.1G279	g2271	g13798.t1	Hpan_g792.t1
Osclob_v00_mik.OX382150.1G247.1	Choren_v00_mik.OX359199.1G375.1	Petfic_v00_mik.OX345636.1G1709	g15824	g7143.t1	Hpan_g10770.t1
Osclob_v00_mik.OX382158.1G258.1	Choren_v00_mik.OX359191.1G457.1	Petfic_v00_mik.OX345637.1G947	g15826	g3873.t1	Hpan_g14260.t1
Osclob_v00_mik.OX382155.1G337.1	Choren_v00_mik.OX359201.1G531.1	Petfic_v00_mik.OX345652.1G581	g8954	g14984.t1	Hpan_g4426.t1
Osclob_v00_mik.OX382158.1G529.1	Choren_v00_mik.OX359192.1G181.1	Petfic_v00_mik.OX345644.1G656	g14364	g5597.t1	Hpan_g3810.t1
Osclob_v00_mik.OX382162.1G209.1	Choren_v00_mik.OX359196.1G145.1	Petfic_v00_mik.OX345646.1G202	g12374	g11420.t1	Hpan_g15660.t1
Osclob_v00_mik.OX382162.1G208.1	Choren_v00_mik.OX359193.1G311.1	Petfic_v00_mik.OX345636.1G6674	g14332	g9650.t1	Hpan_g2903.t1
Osclob_v00_mik.OX382150.1G990.1	Choren_v00_mik.OX359198.1G1024.1	Petfic_v00_mik.OX345636.1G1377	g12376	g13060.t1	Hpan_g4957.t1
Osclob_v00_mik.OX382151.1G405.1	Choren_v00_mik.OX359193.1G915.1	Petfic_v00_mik.OX345636.1G2899	g9505	g6295.t2	Hpan_g461.t1
Osclob_v00_mik.OX382159.1G154.2	Choren_v00_mik.OX359195.1G986.1	Petfic_v00_mik.OX345640.1G433	g14344	g15266.t1	Hpan_g7309.t1
Osclob_v00_mik.OX382156.1G431.1	Choren_v00_mik.OX359190.1G612.1	Petfic_v00_mik.OX345653.1G333	g12375	g3539.t1	Hpan_g12276.t2
Osclob_v00_mik.OX382156.1G434.1	Choren_v00_mik.OX359201.1G860.1	Petfic_v00_mik.OX345637.1G737	g7081	g598.t1	Hpan_g14632.t1
Osclob_v00_mik.OX382151.1G99.1	Choren_v00_mik.OX359194.1G526.1	Petfic_v00_mik.OX345652.1G481	g7391	g8109.t1	Hpan_g563.t1
Osclob_v00_mik.OX382150.1G993.1	Choren_v00_mik.OX359200.1G487.1	Petfic_v00_mik.OX345638.1G1276	g7159		Hpan_g13730.t1
Osclob_v00_mik.OX382154.1G751.1	Choren_v00_mik.OX359192.1G580.1	Petfic_v00_mik.OX345637.1G635	g7159		Hpan_g967.t1
Osclob_v00_mik.OX382154.1G542.1	Choren_v00_mik.OX359197.1G385.1	Petfic_v00_mik.OX345651.1G253	g14138		Hpan_g7238.t1
Osclob_v00_mik.OX382154.1G531.1	Choren_v00_mik.OX359201.1G762.1	Petfic_v00_mik.OX345636.1G6068	g6821		Hpan_g8994.t1
Osclob_v00_mik.OX382154.1G532.1	Choren_v00_mik.OX359197.1G1132.1	Petfic_v00_mik.OX345650.1G678	g16338		Hpan_g11101.t1
Osclob_v00_mik.OX382161.1G438.1	Choren_v00_mik.OX359202.1G877.2	Petfic_v00_mik.OX345650.1G682	g16340		Hpan_g11122.t1
Osclob_v00_mik.OX382157.1G167.1	Choren_v00_mik.OX359201.1G975.1	Petfic_v00_mik.OX345637.1G164	g16338		Hpan_g11104.t1
Osclob_v00_mik.OX382151.1G725.1	Choren_v00_mik.OX359199.1G14.1	Petfic_v00_mik.OX345636.1G5253	g16340		Hpan_g3026.t1
Osclob_v00_mik.OX382167.1G416.1	Choren_v00_mik.OX359192.1G680.1	Petfic_v00_mik.OX345636.1G1975	g4114		Hpan_g14096.t1
Osclob_v00_mik.OX382151.1G35.1	Choren_v00_mik.OX359194.1G787.1	Petfic_v00_mik.OX345636.1G753	g10816		Hpan_g15009.t1
Osclob_v00_mik.OX382159.1G308.2	Choren_v00_mik.OX359189.1G871.1	Petfic_v00_mik.OX345640.1G446	g14338		Hpan_g12122.t1
Osclob_v00_mik.OX382159.1G306.1	Choren_v00_mik.OX359194.1G538.1	Petfic_v00_mik.OX345650.1G255	g12457		Hpan_g12122.t2
Osclob_v00_mik.OX382165.1G419.1	Choren_v00_mik.OX359200.1G514.1	Petfic_v00_mik.OX345636.1G1548	g8983		Hpan_g11128.t1
Osclob_v00_mik.OX382154.1G851.1	Choren_v00_mik.OX359197.1G745.1	Petfic_v00_mik.OX345636.1G2083	g14333		Hpan_g14975.t1
Osclob_v00_mik.OX382156.1G429.1	Choren_v00_mik.OX359197.1G128.1	Petfic_v00_mik.OX345644.1G859	g14333		Hpan_g12220.t1
Osclob_v00_mik.OX382152.1G309.1	Choren_v00_mik.OX359189.1G1708.1	Petfic_v00_mik.OX345636.1G911	g12377		Hpan_g12217.t1
Osclob_v00_mik.OX382160.1G574.1	Choren_v00_mik.OX359191.1G421.1	Petfic_v00_mik.OX345636.1G5285	g13635		Hpan_g255.t1
Osclob_v00_mik.OX382160.1G572.1	Choren_v00_mik.OX359196.1G1150.1	Petfic_v00_mik.OX345644.1G803	g12219		Hpan_g4334.t1
Osclob_v00_mik.OX382161.1G298.1	Choren_v00_mik.OX359190.1G519.1	Petfic_v00_mik.OX345646.1G517	g12226		Hpan_g1591.t1
Osclob_v00_mik.OX382158.1G414.1	Choren_v00_mik.OX359199.1G311.1	Petfic_v00_mik.OX345648.1G846	g12233		Hpan_g9281.t1
Osclob_v00_mik.OX382162.1G259.1	Choren_v00_mik.OX359199.1G358.1	Petfic_v00_mik.OX345651.1G603	g13290		Hpan_g551.t1
Osclob_v00_mik.OX382162.1G263.1	Choren_v00_mik.OX359191.1G185.1	Petfic_v00_mik.OX345642.1G143	g6884		Hpan_g10083.t1
Osclob_v00_mik.OX382160.1G619.1	Choren_v00_mik.OX359192.1G537.1	Petfic_v00_mik.OX345637.1G1589	g6884		Hpan_g12806.t1
Osclob_v00_mik.OX382160.1G364.2	Choren_v00_mik.OX359194.1G428.1	Petfic_v00_mik.OX345647.1G498	g9762		Hpan_g2538.t1
Osclob_v00_mik.OX382160.1G364.1	Choren_v00_mik.OX359190.1G178.1	Petfic_v00_mik.OX345636.1G1722	g14576		Hpan_g235.t1
Osclob_v00_mik.OX382167.1G417.1	Choren_v00_mik.OX359189.1G1155.1	Petfic_v00_mik.OX345643.1G256	g14576		Hpan_g9938.t1
Osclob_v00_mik.OX382168.1G452.1	Choren_v00_mik.OX359194.1G836.1	Petfic_v00_mik.OX345636.1G6645	g14576		Hpan_g9999.t1
Osclob_v00_mik.OX382159.1G30.1	Choren_v00_mik.OX359198.1G905.1	Petfic_v00_mik.OX345651.1G611	g14057		Hpan_g63.t1
Osclob_v00_mik.OX382154.1G784.1	Choren_v00_mik.OX359201.1G266.1	Petfic_v00_mik.OX345638.1G919	g3522		Hpan_g200.t1
Osclob_v00_mik.OX382165.1G387.1	Choren_v00_mik.OX359200.1G313.1	Petfic_v00_mik.OX345636.1G6234	g11656		Hpan_g7629.t1
Osclob_v00_mik.OX382154.1G647.1	Choren_v00_mik.OX359200.1G358.1	Petfic_v00_mik.OX345650.1G232	g11650		Hpan_g3960.t1
Osclob_v00_mik.OX382156.1G378.1	Choren_v00_mik.OX359197.1G451.1	Petfic_v00_mik.OX345638.1G282	g11651		Hpan_g12838.t1
Osclob_v00_mik.OX382156.1G376.2	Choren_v00_mik.OX359201.1G53.1	Petfic_v00_mik.OX345640.1G937	g4332		Hpan_g12838.t2
Osclob_v00_mik.OX382161.1G63.1	Choren_v00_mik.OX359201.1G330.1	Petfic_v00_mik.OX345639.1G1018	g13946		Hpan_g12548.t1
Osclob_v00_mik.OX382165.1G452.1	Choren_v00_mik.OX359194.1G274.1	Petfic_v00_mik.OX345644.1G122	g13946		Hpan_g13375.t1
Osclob_v00_mik.OX382165.1G454.1	Choren_v00_mik.OX359190.1G304.1	Petfic_v00_mik.OX345636.1G2829	g10645		Hpan_g7614.t1
Osclob_v00_mik.OX382158.1G627.1	Choren_v00_mik.OX359200.1G623.1	Petfic_v00_mik.OX345650.1G484	g8453		Hpan_g951.t1
Osclob_v00_mik.OX382158.1G626.1	Choren_v00_mik.OX359189.1G802.1	Petfic_v00_mik.OX345644.1G559	g3047		Hpan_g4071.t1
Osclob_v00_mik.OX382169.1G260.1	Choren_v00_mik.OX359190.1G1472.1	Petfic_v00_mik.OX345641.1G269	g3149		Hpan_g12247.t1
Osclob_v00_mik.OX382151.1G1075.1	Choren_v00_mik.OX359193.1G904.1	Petfic_v00_mik.OX345650.1G471	g6706		Hpan_g2751.t1
Osclob_v00_mik.OX382154.1G650.1	Choren_v00_mik.OX359190.1G1378.1	Petfic_v00_mik.OX345651.1G647	g1774		Hpan_g10168.t1
Osclob_v00_mik.OX382158.1G760.1	Choren_v00_mik.OX359201.1G307.1	Petfic_v00_mik.OX345636.1G4159	g15129		Hpan_g14000.t1
Osclob_v00_mik.OX382158.1G759.1	Choren_v00_mik.OX359192.1G1046.1	Petfic_v00_mik.OX345636.1G4456	g15147		Hpan_g7951.t2
Osclob_v00_mik.OX382164.1G137.1	Choren_v00_mik.OX359201.1G549.1	Petfic_v00_mik.OX345650.1G288	g15128		Hpan_g10824.t1
Osclob_v00_mik.OX382150.1G2169.1	Choren_v00_mik.OX359194.1G66.1	Petfic_v00_mik.OX345642.1G121	g15131		Hpan_g10849.t1
Osclob_v00_mik.OX382161.1G328.1	Choren_v00_mik.OX359194.1G777.1	Petfic_v00_mik.OX345641.1G16	g15131		Hpan_g78.t1
Osclob_v00_mik.OX382162.1G356.1	Choren_v00_mik.OX359192.1G506.1	Petfic_v00_mik.OX345643.1G548	g15151		Hpan_g10758.t1
Osclob_v00_mik.OX382158.1G681.1	Choren_v00_mik.OX359201.1G140.4	Petfic_v00_mik.OX345636.1G7011	g15127		Hpan_g15649.t1
Osclob_v00_mik.OX382151.1G354.1	Choren_v00_mik.OX359190.1G437.1	Petfic_v00_mik.OX345648.1G577	g1767		Hpan_g11395.t1
Osclob_v00_mik.OX382154.1G704.1	Choren_v00_mik.OX359199.1G370.1	Petfic_v00_mik.OX345636.1G5615	g1767		Hpan_g13547.t1
Osclob_v00_mik.OX382151.1G112.1	Choren_v00_mik.OX359198.1G474.1	Petfic_v00_mik.OX345639.1G976	g1443		Hpan_g13543.t1
Osclob_v00_mik.OX382151.1G123.1	Choren_v00_mik.OX359195.1G585.1	Petfic_v00_mik.OX345644.1G823	g1437		Hpan_g5153.t1
Osclob_v00_mik.OX382158.1G239.1	Choren_v00_mik.OX359190.1G968.1	Petfic_v00_mik.OX345636.1G4805	g1436		Hpan_g5148.t2
Osclob_v00_mik.OX382151.1G458.1	Choren_v00_mik.OX359192.1G556.1	Petfic_v00_mik.OX345640.1G476	g1260		Hpan_g1236.t1
Osclob_v00_mik.OX382151.1G465.1	Choren_v00_mik.OX359198.1G275.1	Petfic_v00_mik.OX345638.1G1001	g1260		Hpan_g2715.t1
Osclob_v00_mik.OX382157.1G90.2	Choren_v00_mik.OX359189.1G1461.1	Petfic_v00_mik.OX345645.1G439	g11814		Hpan_g14703.t1
Osclob_v00_mik.OX382158.1G321.1	Choren_v00_mik.OX359197.1G724.1	Petfic_v00_mik.OX345636.1G601	g11812		Hpan_g5571.t1
Osclob_v00_mik.OX382158.1G320.1	Choren_v00_mik.OX359189.1G914.1	Petfic_v00_mik.OX345647.1G74	g11811		Hpan_g10026.t1
Osclob_v00_mik.OX382153.1G727.1	Choren_v00_mik.OX359199.1G387.1	Petfic_v00_mik.OX345645.1G899	g4976		Hpan_g11409.t2
Osclob_v00_mik.OX382153.1G726.1	Choren_v00_mik.OX359199.1G851.1	Petfic_v00_mik.OX345652.1G429	g11813		Hpan_g12356.t4
Osclob_v00_mik.OX382153.1G740.1	Choren_v00_mik.OX359194.1G1033.1	Petfic_v00_mik.OX345645.1G431	g4977		Hpan_g12369.t1
Osclob_v00_mik.OX382161.1G464.1	Choren_v00_mik.OX359190.1G792.1	Petfic_v00_mik.OX345639.1G577	g9479		Hpan_g11190.t1
Osclob_v00_mik.OX382167.1G286.1	Choren_v00_mik.OX359189.1G671.1	Petfic_v00_mik.OX345648.1G314	g2078		Hpan_g10937.t1
Osclob_v00_mik.OX382167.1G419.1	Choren_v00_mik.OX359194.1G997.1	Petfic_v00_mik.OX345636.1G1454	g13798		Hpan_g10929.t1
Osclob_v00_mik.OX382150.1G393.1	Choren_v00_mik.OX359201.1G42.1	Petfic_v00_mik.OX345647.1G442	g13801		Hpan_g12689.t1
Osclob_v00_mik.OX382156.1G575.1	Choren_v00_mik.OX359192.1G447.1	Petfic_v00_mik.OX345636.1G2309	g13802		Hpan_g12715.t1
Osclob_v00_mik.OX382156.1G881.1	Choren_v00_mik.OX359200.1G356.1	Petfic_v00_mik.OX345638.1G255	g13799		Hpan_g15716.t1
Osclob_v00_mik.OX382167.1G454.1	Choren_v00_mik.OX359190.1G571.1	Petfic_v00_mik.OX345643.1G197	g13804		Hpan_g282.t2
Osclob_v00_mik.OX382158.1G335.1	Choren_v00_mik.OX359194.1G990.1	Petfic_v00_mik.OX345638.1G977	g13800		Hpan_g281.t1
Osclob_v00_mik.OX382158.1G378.1	Choren_v00_mik.OX359192.1G593.1	Petfic_v00_mik.OX345647.1G229	g13795		Hpan_g5120.t1
Osclob_v00_mik.OX382157.1G562.1	Choren_v00_mik.OX359199.1G244.1	Petfic_v00_mik.OX345646.1G577	g2077		Hpan_g5275.t1
Osclob_v00_mik.OX382163.1G113.1	Choren_v00_mik.OX359199.1G306.1	Petfic_v00_mik.OX345638.1G920	g13805		Hpan_g10649.t1
Osclob_v00_mik.OX382150.1G1578.1	Choren_v00_mik.OX359196.1G656.1	Petfic_v00_mik.OX345636.1G1537	g2079		Hpan_g9404.t1
Osclob_v00_mik.OX382168.1G33.1	Choren_v00_mik.OX359199.1G323.2	Petfic_v00_mik.OX345636.1G2170	g13794		Hpan_g10683.t1
Osclob_v00_mik.OX382168.1G29.1	Choren_v00_mik.OX359197.1G631.1	Petfic_v00_mik.OX345643.1G386	g13796		Hpan_g295.t1
Osclob_v00_mik.OX382168.1G22.1	Choren_v00_mik.OX359193.1G887.1	Petfic_v00_mik.OX345638.1G719	g13803		Hpan_g12270.t1
Osclob_v00_mik.OX382168.1G23.2	Choren_v00_mik.OX359198.1G767.1	Petfic_v00_mik.OX345636.1G48	g13821		Hpan_g1149.t1
Osclob_v00_mik.OX382157.1G678.1	Choren_v00_mik.OX359199.1G331.2	Petfic_v00_mik.OX345636.1G1430	g13692		Hpan_g3222.t1
Osclob_v00_mik.OX382168.1G20.1	Choren_v00_mik.OX359191.1G840.1	Petfic_v00_mik.OX345653.1G133	g13824		Hpan_g7446.t1
Osclob_v00_mik.OX382154.1G641.1	Choren_v00_mik.OX359189.1G1490.1	Petfic_v00_mik.OX345640.1G185	g13391		Hpan_g3730.t1
Osclob_v00_mik.OX382162.1G596.1	Choren_v00_mik.OX359191.1G455.1	Petfic_v00_mik.OX345638.1G413	g13785		Hpan_g9275.t1
Osclob_v00_mik.OX382167.1G527.1	Choren_v00_mik.OX359201.1G325.2	Petfic_v00_mik.OX345636.1G774	g13825		Hpan_g12356.t3
Osclob_v00_mik.OX382156.1G356.1	Choren_v00_mik.OX359196.1G592.1	Petfic_v00_mik.OX345636.1G5696	g13784		Hpan_g12356.t8
Osclob_v00_mik.OX382163.1G279.1	Choren_v00_mik.OX359194.1G867.1	Petfic_v00_mik.OX345636.1G3334	g13390		Hpan_g12356.t5
Osclob_v00_mik.OX382163.1G375.2	Choren_v00_mik.OX359192.1G93.2	Petfic_v00_mik.OX345653.1G63	g13674		Hpan_g12341.t1
Osclob_v00_mik.OX382161.1G598.2	Choren_v00_mik.OX359202.1G585.1	Petfic_v00_mik.OX345645.1G126	g13675		Hpan_g3982.t1
Osclob_v00_mik.OX382161.1G666.1	Choren_v00_mik.OX359196.1G945.1	Petfic_v00_mik.OX345641.1G547	g5339		Hpan_g436.t1
Osclob_v00_mik.OX382161.1G669.1	Choren_v00_mik.OX359194.1G364.1	Petfic_v00_mik.OX345648.1G305	g11055		Hpan_g8989.t1
Osclob_v00_mik.OX382161.1G584.2	Choren_v00_mik.OX359194.1G481.1	Petfic_v00_mik.OX345642.1G85	g3772		Hpan_g90.t1
Osclob_v00_mik.OX382161.1G665.1	Choren_v00_mik.OX359193.1G600.1	Petfic_v00_mik.OX345639.1G1379	g13838		Hpan_g192.t1
Osclob_v00_mik.OX382163.1G245.1	Choren_v00_mik.OX359197.1G457.1	Petfic_v00_mik.OX345638.1G246	g13746		Hpan_g1065.t1
Osclob_v00_mik.OX382159.1G668.1	Choren_v00_mik.OX359195.1G35.1	Petfic_v00_mik.OX345637.1G978	g13291		Hpan_g11018.t1
Osclob_v00_mik.OX382159.1G323.1	Choren_v00_mik.OX359189.1G1493.1	Petfic_v00_mik.OX345637.1G474	g13291		Hpan_g10932.t2
Osclob_v00_mik.OX382159.1G328.1	Choren_v00_mik.OX359197.1G434.1	Petfic_v00_mik.OX345651.1G379	g13730		Hpan_g4782.t1
Osclob_v00_mik.OX382168.1G163.1	Choren_v00_mik.OX359199.1G530.2	Petfic_v00_mik.OX345636.1G5806	g13696		Hpan_g3927.t1
Osclob_v00_mik.OX382167.1G41.1	Choren_v00_mik.OX359198.1G544.1	Petfic_v00_mik.OX345636.1G3345	g13845		Hpan_g6718.t1
Osclob_v00_mik.OX382167.1G41.3	Choren_v00_mik.OX359195.1G98.1	Petfic_v00_mik.OX345642.1G945	g13773		Hpan_g12284.t1
Osclob_v00_mik.OX382167.1G41.2	Choren_v00_mik.OX359201.1G370.1	Petfic_v00_mik.OX345636.1G396	g13837		Hpan_g12282.t1
Osclob_v00_mik.OX382168.1G384.1	Choren_v00_mik.OX359197.1G658.1	Petfic_v00_mik.OX345636.1G5537	g13818		Hpan_g1767.t1
Osclob_v00_mik.OX382152.1G260.1	Choren_v00_mik.OX359191.1G81.1	Petfic_v00_mik.OX345642.1G189	g13694		Hpan_g1763.t1
Osclob_v00_mik.OX382160.1G621.1	Choren_v00_mik.OX359189.1G659.1	Petfic_v00_mik.OX345648.1G774	g13850		Hpan_g2900.t2
Osclob_v00_mik.OX382150.1G211.1	Choren_v00_mik.OX359189.1G1405.1	Petfic_v00_mik.OX345644.1G850	g8912		Hpan_g5383.t1
Osclob_v00_mik.OX382161.1G97.1	Choren_v00_mik.OX359189.1G1285.1	Petfic_v00_mik.OX345636.1G151	g13822		Hpan_g8020.t1
Osclob_v00_mik.OX382165.1G115.1	Choren_v00_mik.OX359195.1G882.1	Petfic_v00_mik.OX345639.1G1006	g12198		Hpan_g8020.t2
Osclob_v00_mik.OX382154.1G802.1	Choren_v00_mik.OX359199.1G470.1	Petfic_v00_mik.OX345646.1G239	g1225		Hpan_g12418.t1
Osclob_v00_mik.OX382150.1G1020.1	Choren_v00_mik.OX359192.1G264.2	Petfic_v00_mik.OX345647.1G380	g11807		Hpan_g9031.t1
Osclob_v00_mik.OX382151.1G423.1	Choren_v00_mik.OX359199.1G473.1	Petfic_v00_mik.OX345636.1G2384	g16048		Hpan_g9035.t3
Osclob_v00_mik.OX382151.1G409.1	Choren_v00_mik.OX359199.1G368.1	Petfic_v00_mik.OX345636.1G1380	g7034		Hpan_g9031.t2
Osclob_v00_mik.OX382150.1G1128.1	Choren_v00_mik.OX359199.1G400.1	Petfic_v00_mik.OX345636.1G1715	g1225		Hpan_g1397.t1
Osclob_v00_mik.OX382164.1G194.1	Choren_v00_mik.OX359192.1G974.1	Petfic_v00_mik.OX345636.1G1389	g7881		Hpan_g1393.t1
Osclob_v00_mik.OX382167.1G45.1	Choren_v00_mik.OX359199.1G632.1	Petfic_v00_mik.OX345639.1G1206	g4763		Hpan_g12055.t1
Osclob_v00_mik.OX382167.1G44.1	Choren_v00_mik.OX359192.1G667.1	Petfic_v00_mik.OX345636.1G4271	g4764		Hpan_g14210.t1
Osclob_v00_mik.OX382167.1G29.1	Choren_v00_mik.OX359194.1G955.1	Petfic_v00_mik.OX345639.1G1297	g3146		Hpan_g11990.t1
Osclob_v00_mik.OX382166.1G372.1	Choren_v00_mik.OX359195.1G500.1	Petfic_v00_mik.OX345638.1G1048	g5039		Hpan_g4575.t1
Osclob_v00_mik.OX382153.1G799.1	Choren_v00_mik.OX359200.1G366.1	Petfic_v00_mik.OX345647.1G612	g1929		Hpan_g14293.t1
Osclob_v00_mik.OX382153.1G792.1	Choren_v00_mik.OX359201.1G896.1	Petfic_v00_mik.OX345636.1G4508	g15936		Hpan_g1683.t1
Osclob_v00_mik.OX382169.1G395.1	Choren_v00_mik.OX359201.1G203.1	Petfic_v00_mik.OX345643.1G596	g5100		Hpan_g15498.t1
Osclob_v00_mik.OX382165.1G351.1	Choren_v00_mik.OX359198.1G238.1	Petfic_v00_mik.OX345650.1G151	g13813		Hpan_g11995.t1
Osclob_v00_mik.OX382163.1G325.1	Choren_v00_mik.OX359189.1G1379.1	Petfic_v00_mik.OX345644.1G755	g10885		Hpan_g3290.t1
Osclob_v00_mik.OX382166.1G442.1	Choren_v00_mik.OX359194.1G105.1	Petfic_v00_mik.OX345644.1G802	g10882		Hpan_g10924.t1
Osclob_v00_mik.OX382154.1G231.1	Choren_v00_mik.OX359189.1G757.1	Petfic_v00_mik.OX345638.1G913	g9615		Hpan_g1076.t1
Osclob_v00_mik.OX382154.1G230.1	Choren_v00_mik.OX359192.1G1173.1	Petfic_v00_mik.OX345637.1G1894	g4224		Hpan_g2044.t1
Osclob_v00_mik.OX382160.1G191.1	Choren_v00_mik.OX359197.1G913.1	Petfic_v00_mik.OX345638.1G964	g4226		Hpan_g14217.t1
Osclob_v00_mik.OX382154.1G535.1	Choren_v00_mik.OX359193.1G719.1	Petfic_v00_mik.OX345645.1G435	g14332		Hpan_g8370.t1
Osclob_v00_mik.OX382153.1G328.1	Choren_v00_mik.OX359194.1G767.1	Petfic_v00_mik.OX345640.1G15	g4604		Hpan_g10836.t1
Osclob_v00_mik.OX382154.1G796.1	Choren_v00_mik.OX359199.1G335.1	Petfic_v00_mik.OX345649.1G400	g1661		Hpan_g9936.t1
Osclob_v00_mik.OX382169.1G333.1	Choren_v00_mik.OX359201.1G520.1	Petfic_v00_mik.OX345651.1G577	g8119		Hpan_g7952.t1
Osclob_v00_mik.OX382154.1G652.1	Choren_v00_mik.OX359192.1G180.2	Petfic_v00_mik.OX345638.1G925	g8118		Hpan_g4042.t1
Osclob_v00_mik.OX382154.1G678.1	Choren_v00_mik.OX359195.1G314.1	Petfic_v00_mik.OX345642.1G830	g8123		Hpan_g10611.t1
Osclob_v00_mik.OX382156.1G268.1	Choren_v00_mik.OX359189.1G191.1	Petfic_v00_mik.OX345636.1G4674	g8120		Hpan_g14962.t1
Osclob_v00_mik.OX382158.1G66.1	Choren_v00_mik.OX359201.1G453.1	Petfic_v00_mik.OX345646.1G409	g8127		Hpan_g9163.t2
Osclob_v00_mik.OX382158.1G695.1	Choren_v00_mik.OX359195.1G510.1	Petfic_v00_mik.OX345637.1G944	g8120		Hpan_g13744.t1
Osclob_v00_mik.OX382164.1G285.1	Choren_v00_mik.OX359197.1G698.1	Petfic_v00_mik.OX345645.1G454	g8126		Hpan_g443.t1
Osclob_v00_mik.OX382159.1G440.1	Choren_v00_mik.OX359197.1G750.1	Petfic_v00_mik.OX345637.1G1481	g8124		Hpan_g2282.t1
Osclob_v00_mik.OX382166.1G105.1	Choren_v00_mik.OX359192.1G405.1	Petfic_v00_mik.OX345641.1G645	g8122		Hpan_g8549.t1
Osclob_v00_mik.OX382166.1G99.1	Choren_v00_mik.OX359196.1G1104.1	Petfic_v00_mik.OX345649.1G21	g8679		Hpan_g8732.t1
Osclob_v00_mik.OX382163.1G340.1	Choren_v00_mik.OX359199.1G324.1	Petfic_v00_mik.OX345643.1G220	g8678		Hpan_g14708.t1
Osclob_v00_mik.OX382158.1G784.1	Choren_v00_mik.OX359189.1G794.1	Petfic_v00_mik.OX345636.1G550	g14028		Hpan_g10990.t1
Osclob_v00_mik.OX382154.1G760.1	Choren_v00_mik.OX359190.1G982.1	Petfic_v00_mik.OX345636.1G697	g3618		Hpan_g10932.t1
Osclob_v00_mik.OX382165.1G453.1	Choren_v00_mik.OX359201.1G869.1	Petfic_v00_mik.OX345650.1G639	g3615		Hpan_g14847.t1
Osclob_v00_mik.OX382157.1G346.1	Choren_v00_mik.OX359190.1G1431.3	Petfic_v00_mik.OX345636.1G730	g3615		Hpan_g14389.t1
Osclob_v00_mik.OX382150.1G1477.1	Choren_v00_mik.OX359193.1G1422.1	Petfic_v00_mik.OX345636.1G2969	g3618		Hpan_g10957.t1
Osclob_v00_mik.OX382150.1G2107.1	Choren_v00_mik.OX359192.1G176.1	Petfic_v00_mik.OX345650.1G692	g3622		Hpan_g15675.t1
Osclob_v00_mik.OX382160.1G228.1	Choren_v00_mik.OX359195.1G219.1	Petfic_v00_mik.OX345651.1G190	g3622		Hpan_g4393.t1
Osclob_v00_mik.OX382160.1G229.1	Choren_v00_mik.OX359202.1G712.1	Petfic_v00_mik.OX345638.1G701	g3622		Hpan_g11327.t1
Osclob_v00_mik.OX382155.1G514.1	Choren_v00_mik.OX359197.1G1054.1	Petfic_v00_mik.OX345648.1G805	g6709		Hpan_g987.t1
Osclob_v00_mik.OX382150.1G909.1	Choren_v00_mik.OX359199.1G280.1	Petfic_v00_mik.OX345636.1G2223	g6707		Hpan_g11222.t1
Osclob_v00_mik.OX382153.1G919.1	Choren_v00_mik.OX359199.1G378.1	Petfic_v00_mik.OX345636.1G2491	g1775		Hpan_g3333.t1
Osclob_v00_mik.OX382153.1G919.2	Choren_v00_mik.OX359202.1G959.1	Petfic_v00_mik.OX345648.1G194	g6708		Hpan_g11843.t1
Osclob_v00_mik.OX382151.1G205.1	Choren_v00_mik.OX359201.1G316.1	Petfic_v00_mik.OX345638.1G607	g8453		Hpan_g74.t1
Osclob_v00_mik.OX382150.1G200.2	Choren_v00_mik.OX359202.1G64.1	Petfic_v00_mik.OX345642.1G360	g3150		Hpan_g135.t1
Osclob_v00_mik.OX382150.1G200.1	Choren_v00_mik.OX359201.1G535.1	Petfic_v00_mik.OX345636.1G6419	g3884		Hpan_g3634.t2
Osclob_v00_mik.OX382153.1G322.1	Choren_v00_mik.OX359202.1G484.1	Petfic_v00_mik.OX345639.1G291	g3048		Hpan_g11983.t1
Osclob_v00_mik.OX382154.1G779.2	Choren_v00_mik.OX359191.1G280.1	Petfic_v00_mik.OX345650.1G281	g1405		Hpan_g11923.t1
Osclob_v00_mik.OX382166.1G66.1	Choren_v00_mik.OX359198.1G165.1	Petfic_v00_mik.OX345648.1G125	g10364		Hpan_g11382.t1
Osclob_v00_mik.OX382150.1G1609.1	Choren_v00_mik.OX359198.1G291.1	Petfic_v00_mik.OX345642.1G783	g16226		Hpan_g9472.t1
Osclob_v00_mik.OX382159.1G141.1	Choren_v00_mik.OX359191.1G585.1	Petfic_v00_mik.OX345637.1G1349	g16225		Hpan_g9470.t1
Osclob_v00_mik.OX382156.1G354.1	Choren_v00_mik.OX359190.1G410.2	Petfic_v00_mik.OX345642.1G111	g2371		Hpan_g14916.t2
Osclob_v00_mik.OX382150.1G1443.2	Choren_v00_mik.OX359195.1G1107.1	Petfic_v00_mik.OX345645.1G223	g2371
Osclob_v00_mik.OX382150.1G1221.1	Choren_v00_mik.OX359194.1G113.1	Petfic_v00_mik.OX345637.1G1459	g14583
Osclob_v00_mik.OX382164.1G273.1	Choren_v00_mik.OX359190.1G860.1	Petfic_v00_mik.OX345645.1G460	g14584
Osclob_v00_mik.OX382152.1G306.1	Choren_v00_mik.OX359201.1G342.1	Petfic_v00_mik.OX345651.1G279	g271
Osclob_v00_mik.OX382152.1G307.1	Choren_v00_mik.OX359196.1G267.1	Petfic_v00_mik.OX345650.1G220	g4118
Osclob_v00_mik.OX382166.1G119.1	Choren_v00_mik.OX359191.1G1211.1	Petfic_v00_mik.OX345636.1G1728	g4118
Osclob_v00_mik.OX382154.1G594.1	Choren_v00_mik.OX359190.1G660.1	Petfic_v00_mik.OX345643.1G41	g14108
Osclob_v00_mik.OX382159.1G586.1	Choren_v00_mik.OX359200.1G279.1	Petfic_v00_mik.OX345642.1G762	g14108
Osclob_v00_mik.OX382167.1G177.1	Choren_v00_mik.OX359192.1G187.1	Petfic_v00_mik.OX345653.1G315	g14108
Osclob_v00_mik.OX382151.1G649.1	Choren_v00_mik.OX359196.1G275.1	Petfic_v00_mik.OX345641.1G854	g2402
Osclob_v00_mik.OX382158.1G557.1	Choren_v00_mik.OX359201.1G143.1	Petfic_v00_mik.OX345649.1G237	g2402
Osclob_v00_mik.OX382159.1G545.1	Choren_v00_mik.OX359190.1G1039.1	Petfic_v00_mik.OX345636.1G507	g3470
Osclob_v00_mik.OX382158.1G26.1	Choren_v00_mik.OX359193.1G154.1	Petfic_v00_mik.OX345649.1G101	g3470
Osclob_v00_mik.OX382154.1G79.1	Choren_v00_mik.OX359194.1G988.1	Petfic_v00_mik.OX345645.1G716	g3470
Osclob_v00_mik.OX382156.1G351.1	Choren_v00_mik.OX359199.1G394.1	Petfic_v00_mik.OX345644.1G884	g3470
Osclob_v00_mik.OX382168.1G80.1	Choren_v00_mik.OX359200.1G314.1	Petfic_v00_mik.OX345636.1G2018	g3812
Osclob_v00_mik.OX382165.1G424.1	Choren_v00_mik.OX359199.1G325.1	Petfic_v00_mik.OX345636.1G1821	g6975
Osclob_v00_mik.OX382157.1G253.1	Choren_v00_mik.OX359194.1G998.1	Petfic_v00_mik.OX345643.1G267	g16056
Osclob_v00_mik.OX382157.1G260.1	Choren_v00_mik.OX359189.1G888.1	Petfic_v00_mik.OX345636.1G6050	g16056
Osclob_v00_mik.OX382150.1G996.1	Choren_v00_mik.OX359198.1G423.1	Petfic_v00_mik.OX345650.1G572	g16056
Osclob_v00_mik.OX382150.1G1009.2	Choren_v00_mik.OX359197.1G793.1	Petfic_v00_mik.OX345652.1G529	g12446
Osclob_v00_mik.OX382156.1G637.1	Choren_v00_mik.OX359194.1G1000.1	Petfic_v00_mik.OX345650.1G467	g16045
Osclob_v00_mik.OX382150.1G261.1	Choren_v00_mik.OX359198.1G652.1	Petfic_v00_mik.OX345651.1G513	g16045
Osclob_v00_mik.OX382160.1G53.1	Choren_v00_mik.OX359195.1G225.1	Petfic_v00_mik.OX345637.1G1764	g16045
Osclob_v00_mik.OX382162.1G509.1	Choren_v00_mik.OX359199.1G630.1	Petfic_v00_mik.OX345636.1G1989	g13157
Osclob_v00_mik.OX382150.1G1479.1	Choren_v00_mik.OX359193.1G1326.1	Petfic_v00_mik.OX345651.1G99	g13158
Osclob_v00_mik.OX382154.1G331.1	Choren_v00_mik.OX359200.1G926.1	Petfic_v00_mik.OX345642.1G853	g11900
Osclob_v00_mik.OX382152.1G98.1	Choren_v00_mik.OX359189.1G882.1	Petfic_v00_mik.OX345639.1G234	g5350
Osclob_v00_mik.OX382152.1G442.1	Choren_v00_mik.OX359201.1G380.1	Petfic_v00_mik.OX345644.1G592	g5351
Osclob_v00_mik.OX382152.1G443.2	Choren_v00_mik.OX359200.1G138.1	Petfic_v00_mik.OX345652.1G336	g5350
Osclob_v00_mik.OX382150.1G494.2	Choren_v00_mik.OX359195.1G894.1	Petfic_v00_mik.OX345638.1G876	g8977
Osclob_v00_mik.OX382150.1G497.1	Choren_v00_mik.OX359199.1G1083.1	Petfic_v00_mik.OX345636.1G1213	g8977
Osclob_v00_mik.OX382150.1G494.1	Choren_v00_mik.OX359194.1G273.1	Petfic_v00_mik.OX345642.1G468	g7645
Osclob_v00_mik.OX382150.1G702.1	Choren_v00_mik.OX359201.1G345.1	Petfic_v00_mik.OX345636.1G330	g7633
Osclob_v00_mik.OX382150.1G1615.1	Choren_v00_mik.OX359192.1G167.1	Petfic_v00_mik.OX345651.1G512	g7640
Osclob_v00_mik.OX382150.1G1614.1	Choren_v00_mik.OX359193.1G16.1	Petfic_v00_mik.OX345638.1G687	g7685
Osclob_v00_mik.OX382164.1G295.1	Choren_v00_mik.OX359192.1G376.1	Petfic_v00_mik.OX345644.1G546	g10583
Osclob_v00_mik.OX382154.1G100.1	Choren_v00_mik.OX359196.1G881.1	Petfic_v00_mik.OX345636.1G6202	g15045
Osclob_v00_mik.OX382159.1G495.1	Choren_v00_mik.OX359197.1G648.1	Petfic_v00_mik.OX345636.1G5818	g2817
Osclob_v00_mik.OX382167.1G442.1	Choren_v00_mik.OX359201.1G367.1	Petfic_v00_mik.OX345650.1G514	g11677
Osclob_v00_mik.OX382167.1G547.1	Choren_v00_mik.OX359200.1G133.1	Petfic_v00_mik.OX345645.1G675	g11677
Osclob_v00_mik.OX382150.1G496.1	Choren_v00_mik.OX359195.1G863.1	Petfic_v00_mik.OX345644.1G309	g16243
Osclob_v00_mik.OX382154.1G845.1	Choren_v00_mik.OX359193.1G1224.1	Petfic_v00_mik.OX345645.1G449	g15188
Osclob_v00_mik.OX382162.1G529.1	Choren_v00_mik.OX359201.1G372.1	Petfic_v00_mik.OX345636.1G2098	g9652
Osclob_v00_mik.OX382150.1G240.1	Choren_v00_mik.OX359192.1G416.1	Petfic_v00_mik.OX345646.1G314	g15001
Osclob_v00_mik.OX382150.1G240.2	Choren_v00_mik.OX359189.1G883.1	Petfic_v00_mik.OX345638.1G654	g10049
Osclob_v00_mik.OX382150.1G1476.1	Choren_v00_mik.OX359199.1G403.1	Petfic_v00_mik.OX345647.1G479	g7393
Osclob_v00_mik.OX382156.1G255.1	Choren_v00_mik.OX359195.1G786.1	Petfic_v00_mik.OX345636.1G1617	g5202
Osclob_v00_mik.OX382156.1G243.1	Choren_v00_mik.OX359201.1G315.1	Petfic_v00_mik.OX345651.1G229	g5201
Osclob_v00_mik.OX382150.1G609.1	Choren_v00_mik.OX359189.1G1636.1	Petfic_v00_mik.OX345638.1G907	g10893
Osclob_v00_mik.OX382155.1G191.1	Choren_v00_mik.OX359193.1G1006.1	Petfic_v00_mik.OX345645.1G439	g272
Osclob_v00_mik.OX382169.1G311.1	Choren_v00_mik.OX359193.1G885.1	Petfic_v00_mik.OX345650.1G80	g269
Osclob_v00_mik.OX382156.1G165.1	Choren_v00_mik.OX359197.1G156.1	Petfic_v00_mik.OX345638.1G603	g269
Osclob_v00_mik.OX382156.1G167.1	Choren_v00_mik.OX359190.1G814.1	Petfic_v00_mik.OX345638.1G957	g2138
Osclob_v00_mik.OX382163.1G547.1	Choren_v00_mik.OX359196.1G1087.1	Petfic_v00_mik.OX345636.1G2207	g2139
Osclob_v00_mik.OX382168.1G398.1	Choren_v00_mik.OX359197.1G622.1	Petfic_v00_mik.OX345640.1G546	g11555
Osclob_v00_mik.OX382168.1G397.1	Choren_v00_mik.OX359201.1G304.1	Petfic_v00_mik.OX345638.1G650	g2141
Osclob_v00_mik.OX382160.1G515.1	Choren_v00_mik.OX359192.1G784.1	Petfic_v00_mik.OX345644.1G512	g2142
Osclob_v00_mik.OX382167.1G404.1	Choren_v00_mik.OX359194.1G954.1	Petfic_v00_mik.OX345644.1G382	g12077
Osclob_v00_mik.OX382167.1G179.1	Choren_v00_mik.OX359191.1G102.1	Petfic_v00_mik.OX345647.1G54	g2288
Osclob_v00_mik.OX382168.1G45.1	Choren_v00_mik.OX359194.1G173.1	Petfic_v00_mik.OX345636.1G6307	g12076
Osclob_v00_mik.OX382164.1G460.1	Choren_v00_mik.OX359189.1G1209.1	Petfic_v00_mik.OX345636.1G4253	g2140
Osclob_v00_mik.OX382150.1G2017.1	Choren_v00_mik.OX359197.1G309.1	Petfic_v00_mik.OX345651.1G67	g11981
Osclob_v00_mik.OX382164.1G587.2	Choren_v00_mik.OX359196.1G1069.1	Petfic_v00_mik.OX345649.1G413	g14239
Osclob_v00_mik.OX382150.1G2137.2	Choren_v00_mik.OX359191.1G123.1	Petfic_v00_mik.OX345639.1G1129	g5590
Osclob_v00_mik.OX382150.1G2137.1	Choren_v00_mik.OX359193.1G1482.1	Petfic_v00_mik.OX345638.1G16	g5590
Osclob_v00_mik.OX382161.1G363.1	Choren_v00_mik.OX359194.1G637.1	Petfic_v00_mik.OX345645.1G142	g7662
Osclob_v00_mik.OX382161.1G600.1	Choren_v00_mik.OX359201.1G588.1	Petfic_v00_mik.OX345650.1G515	g7632
Osclob_v00_mik.OX382161.1G601.1	Choren_v00_mik.OX359199.1G936.1	Petfic_v00_mik.OX345638.1G340	g7318
Osclob_v00_mik.OX382154.1G691.1	Choren_v00_mik.OX359193.1G1348.1	Petfic_v00_mik.OX345645.1G437	g998
Osclob_v00_mik.OX382150.1G2167.1	Choren_v00_mik.OX359201.1G339.1	Petfic_v00_mik.OX345645.1G482	g10749
Osclob_v00_mik.OX382150.1G275.2	Choren_v00_mik.OX359201.1G872.1	Petfic_v00_mik.OX345651.1G311	g10749
Osclob_v00_mik.OX382150.1G254.1	Choren_v00_mik.OX359189.1G891.1	Petfic_v00_mik.OX345644.1G681	g10747
Osclob_v00_mik.OX382164.1G466.1	Choren_v00_mik.OX359193.1G1301.1	Petfic_v00_mik.OX345644.1G611	g10747
Osclob_v00_mik.OX382166.1G364.1	Choren_v00_mik.OX359189.1G857.1	Petfic_v00_mik.OX345639.1G1024	g10748
Osclob_v00_mik.OX382150.1G722.1	Choren_v00_mik.OX359200.1G153.1	Petfic_v00_mik.OX345650.1G640	g10686
Osclob_v00_mik.OX382159.1G100.1	Choren_v00_mik.OX359189.1G813.1	Petfic_v00_mik.OX345636.1G6828	g9879
Osclob_v00_mik.OX382150.1G837.1	Choren_v00_mik.OX359198.1G74.1	Petfic_v00_mik.OX345644.1G667	g9879
Osclob_v00_mik.OX382152.1G915.1	Choren_v00_mik.OX359189.1G1065.1	Petfic_v00_mik.OX345643.1G257	g9880
Osclob_v00_mik.OX382152.1G916.2	Choren_v00_mik.OX359193.1G1459.1	Petfic_v00_mik.OX345645.1G675	g9880
Osclob_v00_mik.OX382152.1G917.1	Choren_v00_mik.OX359193.1G1289.2	Petfic_v00_mik.OX345636.1G2478	g9880
Osclob_v00_mik.OX382154.1G280.1	Choren_v00_mik.OX359190.1G877.1	Petfic_v00_mik.OX345649.1G439	g9870
Osclob_v00_mik.OX382168.1G28.1	Choren_v00_mik.OX359199.1G464.1	Petfic_v00_mik.OX345639.1G366	g10263
Osclob_v00_mik.OX382150.1G803.1	Choren_v00_mik.OX359198.1G486.1	Petfic_v00_mik.OX345652.1G184	g11869
Osclob_v00_mik.OX382150.1G812.1	Choren_v00_mik.OX359192.1G1378.1	Petfic_v00_mik.OX345648.1G343	g2148
Osclob_v00_mik.OX382153.1G834.1	Choren_v00_mik.OX359200.1G974.1	Petfic_v00_mik.OX345636.1G1776	g2151
Osclob_v00_mik.OX382153.1G831.1	Choren_v00_mik.OX359200.1G134.1	Petfic_v00_mik.OX345636.1G2275	g11851
Osclob_v00_mik.OX382150.1G312.1	Choren_v00_mik.OX359195.1G70.1	Petfic_v00_mik.OX345645.1G472	g11849
Osclob_v00_mik.OX382150.1G306.1	Choren_v00_mik.OX359192.1G823.1	Petfic_v00_mik.OX345647.1G223	g4179
Osclob_v00_mik.OX382159.1G160.1	Choren_v00_mik.OX359196.1G313.1	Petfic_v00_mik.OX345636.1G2025	g12747
Osclob_v00_mik.OX382150.1G1107.1	Choren_v00_mik.OX359191.1G120.1	Petfic_v00_mik.OX345636.1G2319	g10425
Osclob_v00_mik.OX382156.1G25.1	Choren_v00_mik.OX359202.1G395.1	Petfic_v00_mik.OX345644.1G809	g8339
Osclob_v00_mik.OX382165.1G216.1	Choren_v00_mik.OX359190.1G1434.1	Petfic_v00_mik.OX345645.1G603	g9043
Osclob_v00_mik.OX382153.1G689.1	Choren_v00_mik.OX359196.1G1190.1	Petfic_v00_mik.OX345646.1G558	g12537
Osclob_v00_mik.OX382153.1G685.1	Choren_v00_mik.OX359198.1G135.1	Petfic_v00_mik.OX345636.1G1139	g152
Osclob_v00_mik.OX382150.1G74.1	Choren_v00_mik.OX359194.1G780.1	Petfic_v00_mik.OX345647.1G169	g174
Osclob_v00_mik.OX382150.1G84.1	Choren_v00_mik.OX359193.1G695.1	Petfic_v00_mik.OX345650.1G60	g11371
Osclob_v00_mik.OX382150.1G87.1	Choren_v00_mik.OX359192.1G1172.1	Petfic_v00_mik.OX345636.1G1656	g10234
Osclob_v00_mik.OX382155.1G160.1	Choren_v00_mik.OX359201.1G358.1	Petfic_v00_mik.OX345644.1G669	g2454
Osclob_v00_mik.OX382167.1G427.1	Choren_v00_mik.OX359199.1G431.1	Petfic_v00_mik.OX345640.1G460	g10621
Osclob_v00_mik.OX382158.1G339.1	Choren_v00_mik.OX359201.1G515.1	Petfic_v00_mik.OX345653.1G607	g8315
Osclob_v00_mik.OX382169.1G25.1	Choren_v00_mik.OX359194.1G216.1	Petfic_v00_mik.OX345636.1G1756	g5742
Osclob_v00_mik.OX382169.1G51.1	Choren_v00_mik.OX359193.1G452.1	Petfic_v00_mik.OX345637.1G97	g4285
Osclob_v00_mik.OX382168.1G136.1	Choren_v00_mik.OX359202.1G420.1	Petfic_v00_mik.OX345645.1G137	g7445
Osclob_v00_mik.OX382150.1G620.2	Choren_v00_mik.OX359191.1G1213.1	Petfic_v00_mik.OX345639.1G452	g7432
Osclob_v00_mik.OX382150.1G619.1	Choren_v00_mik.OX359198.1G774.1	Petfic_v00_mik.OX345641.1G1009	g7453
Osclob_v00_mik.OX382158.1G590.1	Choren_v00_mik.OX359195.1G892.1	Petfic_v00_mik.OX345643.1G110	g7004
Osclob_v00_mik.OX382154.1G687.1	Choren_v00_mik.OX359197.1G594.1	Petfic_v00_mik.OX345636.1G2249	g7004
Osclob_v00_mik.OX382158.1G752.1	Choren_v00_mik.OX359192.1G1110.1	Petfic_v00_mik.OX345640.1G979	g8445
Osclob_v00_mik.OX382158.1G236.1	Choren_v00_mik.OX359202.1G465.1	Petfic_v00_mik.OX345638.1G924	g6093
Osclob_v00_mik.OX382154.1G73.1		Petfic_v00_mik.OX345641.1G1027	g13680
Osclob_v00_mik.OX382163.1G354.1		Petfic_v00_mik.OX345636.1G2890	g4046
Osclob_v00_mik.OX382150.1G910.1		Petfic_v00_mik.OX345636.1G5720	g11550
Osclob_v00_mik.OX382156.1G724.1		Petfic_v00_mik.OX345642.1G840	g3569
Osclob_v00_mik.OX382165.1G97.1		Petfic_v00_mik.OX345643.1G41	g4487
Osclob_v00_mik.OX382156.1G563.1		Petfic_v00_mik.OX345640.1G621	g7389
Osclob_v00_mik.OX382154.1G227.1		Petfic_v00_mik.OX345639.1G1211	g7389
Osclob_v00_mik.OX382150.1G53.1		Petfic_v00_mik.OX345636.1G1549
Osclob_v00_mik.OX382159.1G143.1		Petfic_v00_mik.OX345636.1G6882
Osclob_v00_mik.OX382150.1G872.1		Petfic_v00_mik.OX345640.1G463
Osclob_v00_mik.OX382150.1G956.1		Petfic_v00_mik.OX345638.1G1003
Osclob_v00_mik.OX382150.1G954.2		Petfic_v00_mik.OX345636.1G1679
Osclob_v00_mik.CANNPT010000001.1G11.1		Petfic_v00_mik.OX345639.1G233
Osclob_v00_mik.OX382160.1G370.1		Petfic_v00_mik.OX345650.1G316
Osclob_v00_mik.OX382160.1G368.1		Petfic_v00_mik.OX345638.1G599
Osclob_v00_mik.OX382163.1G422.1		Petfic_v00_mik.OX345636.1G6485
Osclob_v00_mik.OX382163.1G423.1		Petfic_v00_mik.OX345638.1G342
Osclob_v00_mik.OX382166.1G379.1		Petfic_v00_mik.OX345637.1G64
Osclob_v00_mik.OX382150.1G1568.1		Petfic_v00_mik.OX345644.1G643
Osclob_v00_mik.OX382168.1G84.1		Petfic_v00_mik.OX345650.1G277
Osclob_v00_mik.OX382159.1G721.1		Petfic_v00_mik.OX345647.1G152
Osclob_v00_mik.OX382150.1G165.1		Petfic_v00_mik.OX345642.1G705
Osclob_v00_mik.OX382150.1G2190.1		Petfic_v00_mik.OX345648.1G581
Osclob_v00_mik.OX382159.1G770.1		Petfic_v00_mik.OX345640.1G457
Osclob_v00_mik.OX382163.1G24.2		Petfic_v00_mik.OX345649.1G38
Osclob_v00_mik.OX382160.1G157.1		Petfic_v00_mik.OX345647.1G196
Osclob_v00_mik.OX382159.1G173.1		Petfic_v00_mik.OX345645.1G234
Osclob_v00_mik.OX382150.1G2052.1		Petfic_v00_mik.OX345649.1G124
Osclob_v00_mik.OX382150.1G2051.1		Petfic_v00_mik.OX345636.1G4429
Osclob_v00_mik.OX382154.1G202.1		Petfic_v00_mik.OX345640.1G928
Osclob_v00_mik.OX382165.1G445.1		Petfic_v00_mik.OX345642.1G660
Osclob_v00_mik.OX382156.1G70.1		Petfic_v00_mik.OX345636.1G4232
Osclob_v00_mik.OX382154.1G54.1		Petfic_v00_mik.OX345638.1G878
Osclob_v00_mik.OX382164.1G584.1		Petfic_v00_mik.OX345641.1G854
Osclob_v00_mik.OX382150.1G508.1		Petfic_v00_mik.OX345639.1G1135
Osclob_v00_mik.OX382150.1G1395.1		Petfic_v00_mik.OX345645.1G655
Osclob_v00_mik.OX382162.1G117.1		Petfic_v00_mik.OX345637.1G774
Osclob_v00_mik.OX382162.1G117.2		Petfic_v00_mik.OX345644.1G802
		Petfic_v00_mik.OX345644.1G789
		Petfic_v00_mik.OX345644.1G831
		Petfic_v00_mik.OX345638.1G1003
		Petfic_v00_mik.OX345636.1G6358
		Petfic_v00_mik.OX345639.1G238
		Petfic_v00_mik.OX345644.1G848
		Petfic_v00_mik.OX345644.1G832
		Petfic_v00_mik.OX345642.1G195
		Petfic_v00_mik.OX345638.1G661
		Petfic_v00_mik.OX345651.1G362
		Petfic_v00_mik.OX345652.1G646
		Petfic_v00_mik.OX345636.1G5126
		Petfic_v00_mik.OX345644.1G803
		Petfic_v00_mik.OX345636.1G918
		Petfic_v00_mik.OX345636.1G5289
		Petfic_v00_mik.OX345645.1G697
		Petfic_v00_mik.OX345636.1G1078
		Petfic_v00_mik.OX345636.1G5952
		Petfic_v00_mik.OX345642.1G840
		Petfic_v00_mik.OX345639.1G745
		Petfic_v00_mik.OX345646.1G261
		Petfic_v00_mik.OX345644.1G471
		Petfic_v00_mik.OX345642.1G762
		Petfic_v00_mik.OX345649.1G387
		Petfic_v00_mik.OX345651.1G438
		Petfic_v00_mik.OX345640.1G945
		Petfic_v00_mik.OX345649.1G760
		Petfic_v00_mik.OX345646.1G208
		Petfic_v00_mik.OX345650.1G186
		Petfic_v00_mik.OX345643.1G113
		Petfic_v00_mik.OX345640.1G951
		Petfic_v00_mik.OX345643.1G206
		Petfic_v00_mik.OX345637.1G620
		Petfic_v00_mik.OX345636.1G5331
		Petfic_v00_mik.OX345639.1G233
		Petfic_v00_mik.OX345636.1G5037
		Petfic_v00_mik.OX345650.1G324
		Petfic_v00_mik.OX345648.1G584
		Petfic_v00_mik.OX345641.1G878
		Petfic_v00_mik.OX345636.1G6202
		Petfic_v00_mik.OX345637.1G1435
		Petfic_v00_mik.OX345636.1G7011
		Petfic_v00_mik.OX345639.1G1318
		Petfic_v00_mik.OX345636.1G4562
		Petfic_v00_mik.OX345646.1G216
		Petfic_v00_mik.OX345636.1G6360
		Petfic_v00_mik.OX345652.1G236
		Petfic_v00_mik.OX345651.1G511
		Petfic_v00_mik.OX345653.1G240
		Petfic_v00_mik.OX345642.1G392
		Petfic_v00_mik.OX345636.1G4159
		Petfic_v00_mik.OX345640.1G15
		Petfic_v00_mik.OX345638.1G975
		Petfic_v00_mik.OX345636.1G2845
		Petfic_v00_mik.OX345645.1G126
		Petfic_v00_mik.OX345642.1G987
		Petfic_v00_mik.OX345638.1G486
		Petfic_v00_mik.OX345637.1G580
		Petfic_v00_mik.OX345651.1G512
		Petfic_v00_mik.OX345647.1G154
		Petfic_v00_mik.OX345636.1G2798
		Petfic_v00_mik.OX345650.1G214
		Petfic_v00_mik.OX345640.1G93
		Petfic_v00_mik.OX345636.1G4229
		Petfic_v00_mik.OX345636.1G4240
		Petfic_v00_mik.OX345649.1G124
		Petfic_v00_mik.OX345636.1G5568
		Petfic_v00_mik.OX345636.1G6514
		Petfic_v00_mik.OX345636.1G4836
		Petfic_v00_mik.OX345646.1G135
		Petfic_v00_mik.OX345636.1G3381
		Petfic_v00_mik.OX345636.1G1082
		Petfic_v00_mik.OX345643.1G545
		Petfic_v00_mik.OX345650.1G305
		Petfic_v00_mik.OX345636.1G1514
		Petfic_v00_mik.OX345646.1G339
		Petfic_v00_mik.OX345653.1G547
		Petfic_v00_mik.OX345636.1G1989
		Petfic_v00_mik.OX345646.1G596
		Petfic_v00_mik.OX345646.1G235
		Petfic_v00_mik.OX345640.1G699
		Petfic_v00_mik.OX345636.1G5077
		Petfic_v00_mik.OX345636.1G4137
		Petfic_v00_mik.OX345640.1G59
		Petfic_v00_mik.OX345637.1G1464
		Petfic_v00_mik.OX345644.1G546
		Petfic_v00_mik.OX345643.1G337
		Petfic_v00_mik.OX345648.1G291
		Petfic_v00_mik.OX345644.1G309
		Petfic_v00_mik.OX345636.1G1213
		Petfic_v00_mik.OX345636.1G1117
		Petfic_v00_mik.OX345641.1G604
		Petfic_v00_mik.OX345636.1G2126
		Petfic_v00_mik.OX345638.1G942
		Petfic_v00_mik.OX345636.1G5008
		Petfic_v00_mik.OX345640.1G2
		Petfic_v00_mik.OX345636.1G538
		Petfic_v00_mik.OX345644.1G847
		Petfic_v00_mik.OX345636.1G6052
		Petfic_v00_mik.OX345637.1G1799
		Petfic_v00_mik.OX345636.1G1558
		Petfic_v00_mik.OX345651.1G252
		Petfic_v00_mik.OX345640.1G465
		Petfic_v00_mik.OX345643.1G669
		Petfic_v00_mik.OX345651.1G611
		Petfic_v00_mik.OX345636.1G6626
		Petfic_v00_mik.OX345649.1G380
		Petfic_v00_mik.OX345644.1G823
		Petfic_v00_mik.OX345644.1G731
		Petfic_v00_mik.OX345636.1G5818
		Petfic_v00_mik.OX345636.1G5682
		Petfic_v00_mik.OX345648.1G19
		Petfic_v00_mik.OX345636.1G6467
		Petfic_v00_mik.OX345639.1G1233
		Petfic_v00_mik.OX345644.1G799
		Petfic_v00_mik.OX345644.1G691
		Petfic_v00_mik.OX345650.1G569
		Petfic_v00_mik.OX345645.1G58
		Petfic_v00_mik.OX345642.1G455
		Petfic_v00_mik.OX345645.1G557
		Petfic_v00_mik.OX345644.1G693
		Petfic_v00_mik.OX345636.1G6299
		Petfic_v00_mik.OX345637.1G722
		Petfic_v00_mik.OX345644.1G635
		Petfic_v00_mik.OX345636.1G1377
		Petfic_v00_mik.OX345649.1G38
		Petfic_v00_mik.OX345638.1G822
		Petfic_v00_mik.OX345636.1G1785
		Petfic_v00_mik.OX345639.1G1533
		Petfic_v00_mik.OX345644.1G219
		Petfic_v00_mik.OX345639.1G1231
		Petfic_v00_mik.OX345639.1G1136

## Sheet: B. Gene_annotations_sexloci
Oscarella_lobularis	Chondrosia_reniformis	Petrosia ficiformis	Geodia barretti	Geodia hentscheli	Phakellia_ventilabrum	Axinella damicornis	Halichondria panicea
5NTC	2AAA	AAK1	3HIDH	ABCA4	60A	ANR52	4EBP2
A1I3	ABHDD	AB9A	AADAT	ABCA9	ABCG1	ANR55	AAK1
ABCC9	ABL1	ABCA1	AB17B	ACON	ABCG2	ATP7A	ANM2
ABHD8	ADA	ABCB1	ABCAC	ACP7	ABCG5	CHIN	ANR16
ACSA	ADAS	ACDSB	ACMSD	ACSA	ACSF4	DSCL	ANR44
ADCYA	AIMP1	ADDA	ACPM	ACSF3	AGRG6	DYHC	ANS1A
AGO3	AKIB1	ADRO	ACSM4	AGO2	AGRL2	FEM1A	APC
AGRE5	ANKHM	AGAL	ADH1	AIF1	AGRV1	FEM1B	ASPG
AMOL2	AP1B1	AGAL3	AFG1L	AL1L1	AT2A1	FEM1C	AVR2B
AMT2	ARK1	AGRL2	AFG32	ANC2	AT2A2	IF4G1	B4GN3
ANR26	ATGA1	AGRL3	AMACR	ANR40	ATC1	IF4G3	BLI
APC1	ATPI1	AGRV1	AMAL	APC4	BCL3	LAMA1	BLM
APN1	BCP	AKR1	ARF	APKC	BOC	M3K2	BMS1
AR11	BOP1	ALG14	ASGL1	APX1	BRK1B	MICA3	BRAT
ASM	CA112	AMY1	B9D2	ARI1A	CHSTF	MORN1	CCD93
ATG4A	CCD22	ANFY1	BRWD1	AT2L1	CSMD2	MTMR9	CE164
ATG4B	CDK13	ANXA4	CDHR2	CACP	CSN2	PRKDC	CF299
ATLA1	CELR2	AP4E1	CELR1	CATIN	CUL7	RIOK1	CP46A
ATLA2	CENPE	API5	CH60A	CCD39	CUL9	RTBS	CSMD2
ATRX	CF206	AR6P4	CLPX	CDHR1	CYLD	RTCB	CSMD3
BARK	CFDP2	ARMC1	CNDP2	CH60	D19L1	S41A2	CYSP1
BIN3D	CH60	ARMD3	CPLN1	CIRBP	DAPP1	STAG2	DHX35
BOC	CH601	ARP2A	CRYL1	COG2	DIX1A	TESK2	DHX9
BODG	CHEC	ASAP3	CSTFT	COPIA	DLK1	TITIN	DNAI4
BRCA2	CIPKB	ASO	CTR2	CP20A	DPOE1	TNI3K	DOC11
BROMI	CJ067	ATG9A	CTU1	CYSK1	DYH9	TRPA1	EPHA3
BRX1	CL004	ATGA1	CYB	DDI1	DYHC		FCGBP
CAD23	CLAP2	ATPA	DCMC	DIAP1	E2AK2		GABP2
CAH1	COAE	ATR	DGLB	DLDH	E2AK3		GABR1
CC134	COG7	B3GNL	DHB8	DLG1	ENO		GARL3
CD209	COX1	BBS1	DHRS4	DLL4	ENOG		GATA
CE112	COX11	BODG	DLDH	DPS1	EPB1B		GPAT1
CELR	COX15	BRAT	DPYD	DXO	EPHB1		GPKOW
CENPJ	CRT	BTG1	DTWD2	EAA2	EPI1		HTK16
CHM4C	CSN3	BVGS	EAA3	ECHD2	ETFD		INT1
CLPX	CTRO	BXL4	ECHA	EDIL3	FAHD1		ITSN1
CNTN1	CUL4A	BXL6	EFGM	EFTU	FANCJ		KSYK
CNTN6	CUL4B	C163A	ETFA	EGRAP	FAS		LIN41
COX1	DCTN3	CA2D1	ETFB	EPA4A	FBW1B		LITA
CP39A	DDX42	CAA43	FANCJ	EPHX4	FGFR1		LYAM2
CPT2	DGAT1	CAR11	FAT2	EXT2	FREM2		LYAM3
CR3L2	DI3L2	CASP1	FLNA	FBX11	FUMH		M3K2
CSK	DMBT1	CASP8	GATA	FGFR1	FZD1		M3K3
CSMD1	DMBTL	CC137	GBF1	FGFR2	FZD7		MCES
CTHR1	DSCL1	CCNB	GIN1	FPPS	FZD7B		MEPCE
CY561	DYH1	CDCH	GLNA2	FRAS1	G2E3		MMS19
DAPK1	DYHC1	CDON	GMPR2	FREM2	GH7B		MRCKA
DAPK3	ECM29	CELR2	HACD2	FTCD	GLSL		MRP4
DEN4B	EDR1	CFA20	HDHD3	GATA	GPX4		NEC2
DL	EMS1	CHSS1	HSDL2	GCDH	HAP2		NHL1
DPYS	ERDL6	CLA1A	HTR1B	GCP4	HERC1		NHL1
DS	ERGI2	CLP1L	HUNKA	GCSH	HGV2		NHLC2
DSCAM	EXD2	CLPC	IDE	GFPT2	HIG1A		NOM1
DYH10	FCNV1	CLZ9	IF4A	GGA1	IF172		NRARP
ECHM	FEM1A	CNOT9	IGF1R	GLUCM	INT7		PCSK6
EFCB6	FEN1	COBT	KALRN	GOSR2	IQCB1		PGBD3
EI2BE	FMNL2	COG4	LICI2	HDHD3	KC1DA		PGBD4
ELP4	FMNL3	COG8	LIN1	HELZ2	KC1E		PLX2
ERC6L	FREM2	CPNE8	LIN41	HID1	LAMC1		PLXB3
EYA1	FSIP2	CPRA	LUCI	HMCN1	LIN23		PPR27
EYS	FUCO	CSMD2	M2GD	HMLL	LMA2L		PRS8
F102B	FUZZY	CSPC	MA2B1	HPPD	LMAN2		PTPR2
FAK1	FYV1	CSTF3	MEMO1	K319L	LRP1		PTPRA
FARP2	GABR2	CUL3B	MESH1	KCMF1	LRP2		RAD51C
FAT2	GARS	CUL4B	METH	KCP	M3K4		RAB8A
FAT4	GCP5	DCAF6	MFSD9	KIF14	MCM6		RB11A
FBP1	GDT2	DCAF7	MPPB	L2HDH	MEIG1		RB11B
FBX11	GLCP	DCTD	NAC1	LENG8	MINY4		RECQ1
FBX42	GPTC3	DCTN1	NAC3	LGSN	MLKL		RL38
FGD6	GTR8	DCYD1	NDUS2	LIN41	MMAA		RL40
FGFR	HAUS7	DEN11	NFASC	LONM	MTG1		RPA2
FGFR2	HBPA	DGKI	NFS1	LRP2	MYO3B		RTBS
FLNB	HIF1A	DHHB	NFT1	LRP3	NAL12		S12A6
FOCAD	HIP1	DICER	NHLC3	MCEE	NCAM1		SLX1
FRAS1	HTK16	DIP2C	NNTM	MDR2	NETR		SPF45
FUCL	INO1	DJB11	NOMO1	MED1	NIT1		SPOLB
FUCL1	ITCH	DLG1L	NUDT5	MESH1	NIT2		SPTB2
FUCL6	KATL2	DMBT1	P3H1	METH	NOTU2		STT3B
FXL19	KC1A	DMDA	P3H3	MFS11	NUBPL		SVEP1
G3P	KDM4A	DNAJ	P52K	MICU2	ORC4		SYAC
G3ST2	KDM4C	DOC10	PC11Y	MICU3	PAAF1		TM10A
G3ST3	KDM6A	DPH1	PCCA	MITOS	PGBD4		TM131
GGT1	KLDC1	DPH2	PCCB	MP2K1	PIGL		TNI3K
GLCTK	KLH15	DPOD1	PCD15	MP2K2	PIGP		TRAF3
GPTC4	L2HDH	DPPA2	PHB2	MSRA	PNKP		TRET1
GRIA1	L3BPA	DSLE	PHF10	MYO1A	POL5		TRPA1
GRWD1	LEG8	DTX3L	PHIP	MYO7A	PPR27		UBE3B
GTDC1	LICH	DYH2	POL2	NADK	R213A		US6NL
GTPB2	LMBD2	DYH6	POL3	NDRG3	RA51A		USB1
H2AY	LMLN	DYHB	POLR	NEUL4	RAD52		WRN
HCF1	LON	DYHC	PPR21	NHL1	RFC1		YRD6
HDAC4	LORF2	ECD	PRS6B	NICA	RLA0		ZN212
HEM6	LOXH1	EF2	PTER	NU155	ROBO1		ZNFX1
HGNAT	LOXL3	EGCSE	PTPRA	NUD11	RPAB2
HIPL1	LPLT2	EGFR	PYR1	NUDT5	RPB2
HIPL2	LRC40	EI24	R213A	NUP85	RPB3
HMCN1	LRK1	EKI	R213B	OXSM	RS16
HS12B	MACA	ELTD	RBM39	PAL1	RS2
IPO7	MALT	ENOA	RBM48	PALS1	RTBS
IRAK4	MAP22	ERBB3	RRFM	PCCB	S29A4
ITA7	MAT1	ESF2	RS11	PCD16	SAMH1
ITAV	MBD4	EXTL2	RS6	PCSK5	SARAF
JMJD6	MBTP1	F120B	RTBS	PH4H	SCP2
KCMA1	MDTC	FACD2	RTJK	PHF10	SCUB3
KI21A	MED23	FAT4	RTXE	PIGT	SKI2
KI21B	MGAT2	FCGBP	RUFY1	PMS2	SLF1
KLD8A	MGT5A	FCN1B	RUFY2	PNKD	SPAG1
KLDC3	MIAB	FCSD2	SCRIB	POL5	SPX3
KLH38	MIPR	FIMB	SRK2	PPR36	SR140
KPEL	MITOS	FOXP1	SRK3	PRDX3	SRCR1
KPTN	MO4L2	FOXP2	STK11	PRKDC	SRR
LG3BP	MOB1B	FOXP4	SUCA	PSB3	SVEP1
LRRK1	MP2K2	FRAS1	SUCHY	PSD13	SVOP
LRRK2	MPRI	FUCM	SYCC	PTPRF	SYSC
LYAM2	MTREX	FUCO	SYCM	PUR1	TECT
LYAM3	NAA50	FUR2	SYFB	PUR2	TFDP1
LZIC	NAC1	FURIN	SYK	PXDN1	TFDP2
M3K20	NAC2	FUT10	SYLM	R213A	TITIN
M3K7	NCHL1	G6PI	TDX	RAB13	TM9S2
MCM8	NEDD4	GABR1	TGM1	RALY	TMCO3
MDN1	NEK11	GABR2	TGM4	RFA1	TRAF3
MGT4A	NEO1	GALE	TOP1	RHG07	TRAF4
MGT4B	NETR	GALT1	TSP2	RIMC1	TRI56
MGT5A	NGN2	GALT2	WDR49	RL5	TRI59
MGT5B	NLRC4	GAS6	XDH	RSAD1	TRNK1
MINP1	NODI	GATL9	YBOXH	RTBS	TRPM6
MK07	NOLG	GCP4	ZFN2A	RUNX2	TTC37
MLRP2	NOM1	GEFJ	ZFN2B	RXRGA	UBL7
MOM5	NOSF	GIMA4		RXRGB	UBP33
MRC1	NPL1A	GLNA2		S12A9	UBQL4
MRP7	NPNT	GLPK		S6A13	UBR2
MSH2	NSUN2	GLPK2		SBNO2	VPS4B
MTCH2	NU205	GLPT2		SC6A5	WDR7
MVP	OBG	GLRX5		SCLY	YBOXH
MX2	OSGI2	GLYA		SCOT	YPD1
MYCB2	P20D2	GOSR2		SDHAA	YRD6
MYOF	P2OX	GP157		SH2D5	ZDH17
NAT10	P52K	GRAP		SREK1	ZN277
NDUV1	PAE5	GRB2		STA13
NEMP1	PAE9	GREA		SUCA
NET1	PAO1	GRM4		SUSD2
NMP1B	PAR14	GTAA		SYHM
NPC1	PAR15	GXCDD		SYMC
OGT1	PCGF1	H2AX		T2AG
OSTF1	PDE3A	HEAT4		TCPA
OXA1L	PDI2	HECD1		TDX
OXND1	PEAM2	HELLS		TIGRB
OXSR1	PIF1	HELZ		TIM
PAR14	PIGM	HELZ2		TITIN
PB1	PLH14	HEY1		TPPC1
PG2IP	PLXA3	HFM1		TRAF4
PGBD4	PLXA4	HMCN1		TRAF5
PI4KA	PLXB1	HMCN2		TRAF7
PIF1	PO21	HS12A		TRI45
PIWL2	PO22	HTK16		TT39B
PKHL1	POL	HZG		UBR7
PLA2R	POL2	IF4G3		UPP1
PLRG1	POL3	IF4H		UPP2
PLXA1	POL4	IF5		USP
PLXA3	POL5	IFT27		VKORL
PLXA4	PPT1	IKKE		WASL
POL2	PPZD	INF2		WDR97
POL3	PR38A	INO1A		YMQ1
PPA5	PR6AB	IRE1		YRD6
PRS6B	PSN2	ISP6		YXEK
PSMD7	PTAS	ISTB
PTHD3	PTN1	ITB1
PTPRQ	PTPRD	ITB2
PTPRS	PTPRF	ITBX
QORX	PTPRQ	ITPR1
R213A	PTPRT	JAM1
RAB7L	PUB70	JHD1
RAE1L	RAB43	JKAMP
RBGPR	RBGPR	JNK
RECQ5	RBM41	K0754
REV3L	RED	KANK4
RGPA1	RGS3	KAT2A
RHGBA	RH39	KAT5
RIPK1	RHBG	KCP
RIPK2	RIBBA	KEX1A
RIT1	RIOK2	KGP1
RL10A	RL15	KI16B
RM45	RL19	KIFA3
RN167	RN157	KL98A
ROBO2	RNPC3	KLDC2
RXLT1	ROR1	KUNIG
RYK	RPGF4	KXDL1
S2529	RRP15	L6
SARDH	RS27A	LAC4
SC5A8	RSMI	LAC9
SCUB2	S35F5	LATA
SDK2	S39A9	LCTA
SEA	SAC1	LG3BP
SEP3	SACS	LIAS
SETB1	SCAP	LMLN
SGF29	SCOT1	LOGL9
SLB	SD11	LON
SNR40	SECA	LORF2
SNRPA	SIM2	LPLT2
SPTN1	SIS8	LPXH
SPTN5	SLX1	LRIG2
SVEP1	SMC1A	LRK1
TAF8	SNX14	LRP1
TAR1	SOAT1	LRP4
TB10A	SPT48	LRRK2
TECT3	SRCR1	LTN1
TEP1	SUBV	LUTA
TGFR1	SUCB2	LUXA2
THS7B	SYAC	M3K4
TIE1	SYV	MAF1
TITIN	TBCK	MATN1
TLL1	TF212	MCM2
TM104	TITIN	MCM7A
TM131	TKRA	MGAT1
TM145	TM107	MGT5B
TMTC3	TM9S1	MIAB
TNI3K	TMEDE	MIEN1
TORSO	TPPC8	MITD1
TPPC9	TPR	MIX23
TPST1	TRAF3	MOT2
TRM1	TRAF5	MPCP
TRM11	TRAF6	MRNIP
TRPA1	UBA1	MSPD2
TSP2	UBIP1	MTMRA
TTC5	UBXN4	MUC18
TTC8	UN13A	MUSK
TTLL6	UN13B	NAAA
UBP2	UN93A	NAL12
UBXN1	UNC40	NAS39
UFO	VATC1	NBR1
ULK2	VNN1	NDUS3
US6NL	VPS16	NECA1
USH2A	VPS35	NED4L
VATA	VPS53	NEDD4
WDR26	WDR75	NEK8
WDR3	Y3917	NEMF
WDR48	Y4HO	NEO1
XPO6A	Y5516	NETR
XPOT	Y8045	NGB
XYLT	Y9853	NGB2
YRD6	Y9871	NHL1
ZBT44	YDCC	NHLC3
ZNFX1	YG31B	NLRP3
	YKFC	NPD1
	YNG2	NPRL2
	YPDA	NRAM1
	YQL5	NSA2
	YR826	NSF
	YRD6	NSP5
	ZNFX1	NSUN2
		OST48
		OSTF1
		P210L
		P52K
		P5CR1
		PAAJ
		PAHX
		PATS1
		PB1
		PCBP3
		PCDBE
		PCNA
		PDC6I
		PDI2
		PDIA1
		PELET
		PFD5
		PGBD2
		PHO23
		PIEZ2
		PIF1
		PIGT
		PLCG1
		PLD2
		PLDB
		PLDZ1
		PLXA2
		PLXA4
		PMPG
		POC5
		POGK
		POL
		POL2
		POL3
		POL4
		POL5
		POLX
		POLY
		POMT2
		PP6R3
		PPA5
		PQQB
		PRPS1
		PSA
		PTBP1
		PTEN
		PTN21
		PTPRA
		PTPRM
		PTPRS
		PYRG
		PYRG2
		QCR8
		R213A
		R213B
		RAB2B
		RAB6
		RAC1
		RAC1A
		RACA
		RAG3F
		RAPH1
		RBCR
		RECQ
		RGPA1
		RGPS2
		RHG07
		RHG24
		RL10
		RLK90
		RN213
		RN5A
		ROBO2
		RPC6
		RRP12
		RS28
		RTBS
		RTJK
		RTXE
		RU17
		RUBIC
		RYK
		S15A4
		S18B1
		SACS
		SAMH1
		SANBR
		SAP
		SAV2
		SC23A
		SDE3
		SDK
		SDK1
		SDK2
		SECD
		SENP2
		SENP3
		SEP9
		SH3G3
		SIM12
		SIR5B
		SLF1
		SMG5
		SNX14
		SOX
		SPER
		SPF27
		STAR
		STAR5
		STX8
		SUSD2
		SVEP1
		SYFA
		T701
		TAR1
		TBC17
		TBC19
		TBD
		TBK1
		TBX2
		TCB2
		TEKT1
		TF21
		TF212
		TF2B
		THIO
		THTM
		TIP60
		TIPIN
		TLCD4
		TLE3B
		TLL2
		TM147
		TM199
		TM41A
		TMLH
		TOC34
		TOLIP
		TOP3B
		TPRG1
		TRAF2
		TRAF3
		TRAF4
		TRAF5
		TRI17
		TRI33
		TRI37
		TRI45
		TRIM2
		TRIM3
		TRPA1
		TRXB
		TTC23
		UBB
		UBC4
		UBE2F
		UBE3A
		UBIQP
		UBP24
		USH2A
		UTP20
		V246
		VAMP7
		VATA
		VATA2
		VGLU3
		VKT2
		VKT3
		VKT5
		VKT6
		VP13B
		VP35L
		VTXB
		VWKA
		WDR12
		WNT4
		XPP3
		XPR1
		Y0138
		Y1201
		Y132A
		Y1717
		Y4MH
		Y4SN
		Y4WF
		Y8923
		YBOX1
		YCU1
		YCX91
		YFMJ
		YG31B
		YI31B
		YNG2
		YOR6
		YQMA
		YRD6
		ZBED1
		ZMY12
		ZMYM1
		ZMYM2
		ZMYM3
		ZN862
		ZNG1A

## Sheet: C. Sexloci_annotated_sexdetermi
Gene	Oscarella lobularis	Chondrosia reniformis	Petrosia ficiformis	Geodia barretti	Geodia hentscheli	Phakellia ventilabrum	Axinella damicornis	Halichondria panicea	Function
H2AX	0	0	1	0	0	0	0	0	Reproductive process
LBR	1	0	0	0	0	0	0	0	Developmental process
ATRX	1	0	0	0	0	0	0	0	Male sex differentiation
MERTK	1	0	0	0	0	0	0	0	Female sex differentiation
CNOT9	0	0	1	0	0	0	0	0	Reproductive process
HIF1A	0	1	0	0	0	0	0	0	Developmental process
WRN	0	0	0	0	0	0	0	1	Cell communication
RAB13	0	0	0	0	1	0	0	0	Male sex differentiation
CIRBP	0	0	0	0	1	0	0	0	Metabolic process
PCSK5	0	0	0	0	1	0	0	0	Reproductive process
WNT4	0	0	1	0	0	0	0	0	Female sex differentiation/Male sex differentiation
INSRR	1	0	0	0	0	0	0	0	Reproductive process
AGO2	0	0	0	0	1	0	0	0	Reproductive process
MLRP2	1	0	0	0	0	0	0	0	Male sex differentiation
WDR48	1	0	0	0	0	0	0	0	Male sex differentiation
UBE3A	0	0	1	0	0	0	0	0	Female sex differentiation
TBX2	0	0	1	0	0	0	0	0	Developmental process
CYLD	0	0	0	0	0	1	0	0	Developmental process
PCSK6	0	0	0	0	0	0	0	1	Developmental process

## Sheet: D. Sexloci_shared
Gene	Olob	Choren	Pfici	Gbar	Ghen	Adami	Pventi	Hpan	Known_Function_Sex_determination	Shared by
CSMD2	1	0	1	0	0	0	1	1	females	4
TRAF3	0	1	1	0	0	0	1	1	females	4
GATA	0	0	0	1	1	0	0	1	females	3
DYH1	1	1	0	0	0	0	0	0	females	2
TAR1	1	0	1	0	0	0	0	0	females	2
TSP2	1	0	0	1	0	0	0	0	females	2
FBX11	1	0	0	0	1	0	0	0	females	2
FUCO	0	1	1	0	0	0	0	0	females	2
NSUN2	0	1	1	0	0	0	0	0	females	2
AAK1	0	0	1	0	0	0	0	1	females	2
TAF8	1	0	0	0	0	0	0	0	females	1
ADA	0	1	0	0	0	0	0	0	females	1
CDK13	0	1	0	0	0	0	0	0	females	1
CENPE	0	1	0	0	0	0	0	0	females	1
DCTN3	0	1	0	0	0	0	0	0	females	1
KDM4A	0	1	0	0	0	0	0	0	females	1
KDM4C	0	1	0	0	0	0	0	0	females	1
PAO1	0	1	0	0	0	0	0	0	females	1
PCGF1	0	1	0	0	0	0	0	0	females	1
PIGM	0	1	0	0	0	0	0	0	females	1
SOAT1	0	1	0	0	0	0	0	0	females	1
AP4E1	0	0	1	0	0	0	0	0	females	1
CASP8	0	0	1	0	0	0	0	0	females	1
CCNB	0	0	1	0	0	0	0	0	females	1
COG4	0	0	1	0	0	0	0	0	females	1
DICER	0	0	1	0	0	0	0	0	females	1
FACD2	0	0	1	0	0	0	0	0	females	1
FUT10	0	0	1	0	0	0	0	0	females	1
GIMA4	0	0	1	0	0	0	0	0	females	1
H2AX	0	0	1	0	0	0	0	0	females	1
HELLS	0	0	1	0	0	0	0	0	females	1
HELZ	0	0	1	0	0	0	0	0	females	1
HFM1	0	0	1	0	0	0	0	0	females	1
IFT27	0	0	1	0	0	0	0	0	females	1
INF2	0	0	1	0	0	0	0	0	females	1
IRE1	0	0	1	0	0	0	0	0	females	1
ITPR1	0	0	1	0	0	0	0	0	females	1
JKAMP	0	0	1	0	0	0	0	0	females	1
KAT2A	0	0	1	0	0	0	0	0	females	1
MCM2	0	0	1	0	0	0	0	0	females	1
MRNIP	0	0	1	0	0	0	0	0	females	1
MUSK	0	0	1	0	0	0	0	0	females	1
NEMF	0	0	1	0	0	0	0	0	females	1
NLRP3	0	0	1	0	0	0	0	0	females	1
NSA2	0	0	1	0	0	0	0	0	females	1
PLCG1	0	0	1	0	0	0	0	0	females	1
PSA	0	0	1	0	0	0	0	0	females	1
PTPRM	0	0	1	0	0	0	0	0	females	1
SENP2	0	0	1	0	0	0	0	0	females	1
TBX2	0	0	1	0	0	0	0	0	females	1
UBB	0	0	1	0	0	0	0	0	females	1
UBE2F	0	0	1	0	0	0	0	0	females	1
UBE3A	0	0	1	0	0	0	0	0	females	1
WNT4	0	0	1	0	0	0	0	0	females	1
XPR1	0	0	1	0	0	0	0	0	females	1
ZBED1	0	0	1	0	0	0	0	0	females	1
ZMYM3	0	0	1	0	0	0	0	0	females	1
ADH1	0	0	0	1	0	0	0	0	females	1
CELR1	0	0	0	1	0	0	0	0	females	1
CSTFT	0	0	0	1	0	0	0	0	females	1
DHB8	0	0	0	1	0	0	0	0	females	1
GIN1	0	0	0	1	0	0	0	0	females	1
ACSF3	0	0	0	0	1	0	0	0	females	1
HAP2	0	0	0	0	0	0	1	0	females	1
SKI2	0	0	0	0	0	0	1	0	females	1
TMCO3	0	0	0	0	0	0	1	0	females	1
UBR2	0	0	0	0	0	0	1	0	females	1
VPS4B	0	0	0	0	0	0	1	0	females	1
4EBP2	0	0	0	0	0	0	0	1	females	1
ASPG	0	0	0	0	0	0	0	1	females	1
AVR2B	0	0	0	0	0	0	0	1	females	1
BMS1	0	0	0	0	0	0	0	1	females	1
CE164	0	0	0	0	0	0	0	1	females	1
DHX35	0	0	0	0	0	0	0	1	females	1
DHX9	0	0	0	0	0	0	0	1	females	1
DOC11	0	0	0	0	0	0	0	1	females	1
MEPCE	0	0	0	0	0	0	0	1	females	1
MRCKA	0	0	0	0	0	0	0	1	females	1
MRP4	0	0	0	0	0	0	0	1	females	1
PCSK6	0	0	0	0	0	0	0	1	females	1
RB11A	0	0	0	0	0	0	0	1	females	1
S12A6	0	0	0	0	0	0	0	1	females	1
TRET1	0	0	0	0	0	0	0	1	females	1
YRD6	1	1	1	0	1	0	1	1	males	6
RTBS	0	0	1	1	1	1	1	1	males	6
POL2	1	1	1	1	0	0	0	0	males	4
SVEP1	1	0	1	0	0	0	1	1	males	4
POL5	0	1	1	0	1	0	1	0	males	4
PIF1	1	1	1	0	0	0	0	0	males	3
ZNFX1	1	1	0	0	0	0	0	1	males	3
FRAS1	1	0	1	0	1	0	0	0	males	3
HMCN1	1	0	1	0	1	0	0	0	males	3
PRKDC	1	0	0	0	1	1	0	0	males	3
FGFR1	1	0	0	0	1	0	1	0	males	3
FREM2	0	1	0	0	1	0	1	0	males	3
PTPRA	0	0	1	1	0	0	0	1	males	3
NHL1	0	0	1	0	1	0	0	1	males	3
LIN41	0	0	0	1	1	0	0	1	males	3
PTPRD	1	1	0	0	0	0	0	0	males	2
RBGPR	1	1	0	0	0	0	0	0	males	2
FAT4	1	0	1	0	0	0	0	0	males	2
RECQ	1	0	1	0	0	0	0	0	males	2
SPER	1	0	1	0	0	0	0	0	males	2
TEKT1	1	0	1	0	0	0	0	0	males	2
CLPX	1	0	0	1	0	0	0	0	males	2
FAT2	1	0	0	1	0	0	0	0	males	2
IGF1R	1	0	0	1	0	0	0	0	males	2
FGFR2	1	0	0	0	1	0	0	0	males	2
BOC	1	0	0	0	0	0	1	0	males	2
G2E3	1	0	0	0	0	0	1	0	males	2
LON	0	1	1	0	0	0	0	0	males	2
LORF2	0	1	1	0	0	0	0	0	males	2
LRK1	0	1	1	0	0	0	0	0	males	2
NEDD4	0	1	1	0	0	0	0	0	males	2
NEO1	0	1	1	0	0	0	0	0	males	2
PDI2	0	1	1	0	0	0	0	0	males	2
YNG2	0	1	1	0	0	0	0	0	males	2
MP2K2	0	1	0	0	1	0	0	0	males	2
FEM1A	0	1	0	0	0	1	0	0	males	2
NOM1	0	1	0	0	0	0	0	1	males	2
SLX1	0	1	0	0	0	0	0	1	males	2
GLNA2	0	0	1	1	0	0	0	0	males	2
RTJK	0	0	1	1	0	0	0	0	males	2
RTXE	0	0	1	1	0	0	0	0	males	2
GCP4	0	0	1	0	1	0	0	0	males	2
HELZ2	0	0	1	0	1	0	0	0	males	2
KCP	0	0	1	0	1	0	0	0	males	2
M3K4	0	0	1	0	0	0	1	0	males	2
DLDH	0	0	0	1	1	0	0	0	males	2
METH	0	0	0	1	1	0	0	0	males	2
TDX	0	0	0	1	1	0	0	0	males	2
FANCJ	0	0	0	1	0	0	1	0	males	2
YBOXH	0	0	0	1	0	0	1	0	males	2
LRP2	0	0	0	0	1	0	1	0	males	2
ABHD8	1	0	0	0	0	0	0	0	males	1
ADCYA	1	0	0	0	0	0	0	0	males	1
AGO3	1	0	0	0	0	0	0	0	males	1
APC1	1	0	0	0	0	0	0	0	males	1
ASM	1	0	0	0	0	0	0	0	males	1
ATRX	1	0	0	0	0	0	0	0	males	1
BBS7	1	0	0	0	0	0	0	0	males	1
BRCA2	1	0	0	0	0	0	0	0	males	1
C2CD5	1	0	0	0	0	0	0	0	males	1
CBP	1	0	0	0	0	0	0	0	males	1
CSMD1	1	0	0	0	0	0	0	0	males	1
DHRS7	1	0	0	0	0	0	0	0	males	1
FCN1	1	0	0	0	0	0	0	0	males	1
FGFR	1	0	0	0	0	0	0	0	males	1
FGFR4	1	0	0	0	0	0	0	0	males	1
FUCL	1	0	0	0	0	0	0	0	males	1
FUCL1	1	0	0	0	0	0	0	0	males	1
FUCL6	1	0	0	0	0	0	0	0	males	1
G3P	1	0	0	0	0	0	0	0	males	1
GDE1	1	0	0	0	0	0	0	0	males	1
GP2	1	0	0	0	0	0	0	0	males	1
HDAC4	1	0	0	0	0	0	0	0	males	1
INO80	1	0	0	0	0	0	0	0	males	1
INSRR	1	0	0	0	0	0	0	0	males	1
JMJD6	1	0	0	0	0	0	0	0	males	1
KLD8A	1	0	0	0	0	0	0	0	males	1
KLDC3	1	0	0	0	0	0	0	0	males	1
KLH38	1	0	0	0	0	0	0	0	males	1
LBR	1	0	0	0	0	0	0	0	males	1
MCM8	1	0	0	0	0	0	0	0	males	1
MDN1	1	0	0	0	0	0	0	0	males	1
MRC1	1	0	0	0	0	0	0	0	males	1
MRP3	1	0	0	0	0	0	0	0	males	1
MSH2	1	0	0	0	0	0	0	0	males	1
NAT10	1	0	0	0	0	0	0	0	males	1
NDUV1	1	0	0	0	0	0	0	0	males	1
NEK2	1	0	0	0	0	0	0	0	males	1
NPC1	1	0	0	0	0	0	0	0	males	1
OGT1	1	0	0	0	0	0	0	0	males	1
PI4KA	1	0	0	0	0	0	0	0	males	1
PIWL2	1	0	0	0	0	0	0	0	males	1
PSMD7	1	0	0	0	0	0	0	0	males	1
RECQ5	1	0	0	0	0	0	0	0	males	1
RIFK	1	0	0	0	0	0	0	0	males	1
RPTOR	1	0	0	0	0	0	0	0	males	1
SETB1	1	0	0	0	0	0	0	0	males	1
SNRPA	1	0	0	0	0	0	0	0	males	1
SPAG6	1	0	0	0	0	0	0	0	males	1
SYMPK	1	0	0	0	0	0	0	0	males	1
TEMPT	1	0	0	0	0	0	0	0	males	1
TENR	1	0	0	0	0	0	0	0	males	1
TEP1	1	0	0	0	0	0	0	0	males	1
TES	1	0	0	0	0	0	0	0	males	1
TGFR1	1	0	0	0	0	0	0	0	males	1
TORSO	1	0	0	0	0	0	0	0	males	1
UBXN1	1	0	0	0	0	0	0	0	males	1
UFD1	1	0	0	0	0	0	0	0	males	1
VGFR1	1	0	0	0	0	0	0	0	males	1
WDR1	1	0	0	0	0	0	0	0	males	1
WDR48	1	0	0	0	0	0	0	0	males	1
DDX42	0	1	0	0	0	0	0	0	males	1
HAUS7	0	1	0	0	0	0	0	0	males	1
HIP1	0	1	0	0	0	0	0	0	males	1
INO1	0	1	0	0	0	0	0	0	males	1
KDM6A	0	1	0	0	0	0	0	0	males	1
LRC40	0	1	0	0	0	0	0	0	males	1
MAT1	0	1	0	0	0	0	0	0	males	1
NPL1A	0	1	0	0	0	0	0	0	males	1
PDE3A	0	1	0	0	0	0	0	0	males	1
PEAM2	0	1	0	0	0	0	0	0	males	1
PO21	0	1	0	0	0	0	0	0	males	1
RNPC3	0	1	0	0	0	0	0	0	males	1
RRP15	0	1	0	0	0	0	0	0	males	1
SPT48	0	1	0	0	0	0	0	0	males	1
UBA1	0	1	0	0	0	0	0	0	males	1
AGRL3	0	0	1	0	0	0	0	0	males	1
ATR	0	0	1	0	0	0	0	0	males	1
CDCH	0	0	1	0	0	0	0	0	males	1
CDON	0	0	1	0	0	0	0	0	males	1
CSTF3	0	0	1	0	0	0	0	0	males	1
DPPA2	0	0	1	0	0	0	0	0	males	1
ECD	0	0	1	0	0	0	0	0	males	1
EKI	0	0	1	0	0	0	0	0	males	1
FOXP4	0	0	1	0	0	0	0	0	males	1
FUCM	0	0	1	0	0	0	0	0	males	1
GLPK2	0	0	1	0	0	0	0	0	males	1
HEY1	0	0	1	0	0	0	0	0	males	1
KANK4	0	0	1	0	0	0	0	0	males	1
KAT5	0	0	1	0	0	0	0	0	males	1
NGB	0	0	1	0	0	0	0	0	males	1
PCBP3	0	0	1	0	0	0	0	0	males	1
PCNA	0	0	1	0	0	0	0	0	males	1
PTEN	0	0	1	0	0	0	0	0	males	1
RAC1	0	0	1	0	0	0	0	0	males	1
SOX	0	0	1	0	0	0	0	0	males	1
STAR	0	0	1	0	0	0	0	0	males	1
STAR5	0	0	1	0	0	0	0	0	males	1
TIP60	0	0	1	0	0	0	0	0	males	1
TRIM2	0	0	1	0	0	0	0	0	males	1
WDR12	0	0	1	0	0	0	0	0	males	1
XPP3	0	0	1	0	0	0	0	0	males	1
YBOX1	0	0	1	0	0	0	0	0	males	1
ZMYM1	0	0	1	0	0	0	0	0	males	1
AADAT	0	0	0	1	0	0	0	0	males	1
BRWD1	0	0	0	1	0	0	0	0	males	1
CRYL1	0	0	0	1	0	0	0	0	males	1
CYB	0	0	0	1	0	0	0	0	males	1
DHRS4	0	0	0	1	0	0	0	0	males	1
DTWD2	0	0	0	1	0	0	0	0	males	1
ETFB	0	0	0	1	0	0	0	0	males	1
HSDL2	0	0	0	1	0	0	0	0	males	1
PHB2	0	0	0	1	0	0	0	0	males	1
PTER	0	0	0	1	0	0	0	0	males	1
RBM48	0	0	0	1	0	0	0	0	males	1
SCRIB	0	0	0	1	0	0	0	0	males	1
SRK2	0	0	0	1	0	0	0	0	males	1
TGM4	0	0	0	1	0	0	0	0	males	1
TOP1	0	0	0	1	0	0	0	0	males	1
XDH	0	0	0	1	0	0	0	0	males	1
ACON	0	0	0	0	1	0	0	0	males	1
AGO2	0	0	0	0	1	0	0	0	males	1
APC4	0	0	0	0	1	0	0	0	males	1
CCD39	0	0	0	0	1	0	0	0	males	1
CIRBP	0	0	0	0	1	0	0	0	males	1
COG2	0	0	0	0	1	0	0	0	males	1
DIAP1	0	0	0	0	1	0	0	0	males	1
DLG1	0	0	0	0	1	0	0	0	males	1
ECHD2	0	0	0	0	1	0	0	0	males	1
EFTU	0	0	0	0	1	0	0	0	males	1
FPPS	0	0	0	0	1	0	0	0	males	1
FTCD	0	0	0	0	1	0	0	0	males	1
GGA1	0	0	0	0	1	0	0	0	males	1
KCMF1	0	0	0	0	1	0	0	0	males	1
KIF14	0	0	0	0	1	0	0	0	males	1
LRP3	0	0	0	0	1	0	0	0	males	1
MP2K1	0	0	0	0	1	0	0	0	males	1
NDRG3	0	0	0	0	1	0	0	0	males	1
NEUL4	0	0	0	0	1	0	0	0	males	1
NU155	0	0	0	0	1	0	0	0	males	1
OXSM	0	0	0	0	1	0	0	0	males	1
PAL1	0	0	0	0	1	0	0	0	males	1
PALS1	0	0	0	0	1	0	0	0	males	1
PMS2	0	0	0	0	1	0	0	0	males	1
PNKD	0	0	0	0	1	0	0	0	males	1
PPR36	0	0	0	0	1	0	0	0	males	1
PRDX3	0	0	0	0	1	0	0	0	males	1
RAB13	0	0	0	0	1	0	0	0	males	1
RSAD1	0	0	0	0	1	0	0	0	males	1
SBNO2	0	0	0	0	1	0	0	0	males	1
SCLY	0	0	0	0	1	0	0	0	males	1
UBR7	0	0	0	0	1	0	0	0	males	1
UPP2	0	0	0	0	1	0	0	0	males	1
FEM1B	0	0	0	0	0	1	0	0	males	1
FEM1C	0	0	0	0	0	1	0	0	males	1
DAPP1	0	0	0	0	0	0	1	0	males	1
EPHB1	0	0	0	0	0	0	1	0	males	1
FUMH	0	0	0	0	0	0	1	0	males	1
FZD1	0	0	0	0	0	0	1	0	males	1
MCM6	0	0	0	0	0	0	1	0	males	1
MEIG1	0	0	0	0	0	0	1	0	males	1
RS16	0	0	0	0	0	0	1	0	males	1
S29A4	0	0	0	0	0	0	1	0	males	1
TRNK1	0	0	0	0	0	0	1	0	males	1
RAD51	0	0	0	0	0	0	1	0	males	1
TITIN	1	1	0	0	1	1	1	0	#N/A	5
R213A	1	0	1	1	1	0	1	0	#N/A	5
POL3	1	1	1	1	0	0	0	0	#N/A	4
NETR	1	1	1	0	0	0	1	0	#N/A	4
TRPA1	1	0	1	0	0	1	0	1	#N/A	4
PLXA4	1	1	1	0	0	0	0	0	#N/A	3
YG31B	1	1	1	0	0	0	0	0	#N/A	3
AGRV1	1	0	1	0	0	0	1	0	#N/A	3
TNI3K	1	0	0	0	0	1	0	1	#N/A	3
PGBD4	1	0	0	0	0	0	1	1	#N/A	3
P52K	0	1	1	1	0	0	0	0	#N/A	3
TRAF5	0	1	1	0	1	0	0	0	#N/A	3
HTK16	0	1	1	0	0	0	0	1	#N/A	3
TRAF4	0	0	1	0	1	0	1	0	#N/A	3
DYHC	0	0	1	0	0	1	1	0	#N/A	3
COX1	1	1	0	0	0	0	0	0	#N/A	2
DSCL1	1	1	0	0	0	0	0	0	#N/A	2
MGT5A	1	1	0	0	0	0	0	0	#N/A	2
PAR14	1	1	0	0	0	0	0	0	#N/A	2
PLXA3	1	1	0	0	0	0	0	0	#N/A	2
PTPRQ	1	1	0	0	0	0	0	0	#N/A	2
BODG	1	0	1	0	0	0	0	0	#N/A	2
CA2D1	1	0	1	0	0	0	0	0	#N/A	2
CLZ9	1	0	1	0	0	0	0	0	#N/A	2
FCSD2	1	0	1	0	0	0	0	0	#N/A	2
LG3BP	1	0	1	0	0	0	0	0	#N/A	2
LRRK2	1	0	1	0	0	0	0	0	#N/A	2
MGT5B	1	0	1	0	0	0	0	0	#N/A	2
OSTF1	1	0	1	0	0	0	0	0	#N/A	2
PB1	1	0	1	0	0	0	0	0	#N/A	2
PPA5	1	0	1	0	0	0	0	0	#N/A	2
PTPRS	1	0	1	0	0	0	0	0	#N/A	2
RGPA1	1	0	1	0	0	0	0	0	#N/A	2
RN213	1	0	1	0	0	0	0	0	#N/A	2
ROBO2	1	0	1	0	0	0	0	0	#N/A	2
RYK	1	0	1	0	0	0	0	0	#N/A	2
SDK2	1	0	1	0	0	0	0	0	#N/A	2
SEPT9	1	0	1	0	0	0	0	0	#N/A	2
UBC4	1	0	1	0	0	0	0	0	#N/A	2
USH2A	1	0	1	0	0	0	0	0	#N/A	2
VATA	1	0	1	0	0	0	0	0	#N/A	2
Y0138	1	0	1	0	0	0	0	0	#N/A	2
PRS6B	1	0	0	1	0	0	0	0	#N/A	2
ACSA	1	0	0	0	1	0	0	0	#N/A	2
ANC2	1	0	0	0	1	0	0	0	#N/A	2
MYO7A	1	0	0	0	1	0	0	0	#N/A	2
ORC4	1	0	0	0	0	0	1	0	#N/A	2
CSMD3	1	0	0	0	0	0	0	1	#N/A	2
LYAM2	1	0	0	0	0	0	0	1	#N/A	2
LYAM3	1	0	0	0	0	0	0	1	#N/A	2
TM131	1	0	0	0	0	0	0	1	#N/A	2
US6NL	1	0	0	0	0	0	0	1	#N/A	2
ATGA1	0	1	1	0	0	0	0	0	#N/A	2
CELR2	0	1	1	0	0	0	0	0	#N/A	2
CUL4B	0	1	1	0	0	0	0	0	#N/A	2
DMBT1	0	1	1	0	0	0	0	0	#N/A	2
GABR2	0	1	1	0	0	0	0	0	#N/A	2
LMLN	0	1	1	0	0	0	0	0	#N/A	2
LPLT2	0	1	1	0	0	0	0	0	#N/A	2
MIAB	0	1	1	0	0	0	0	0	#N/A	2
POL	0	1	1	0	0	0	0	0	#N/A	2
POL4	0	1	1	0	0	0	0	0	#N/A	2
SACS	0	1	1	0	0	0	0	0	#N/A	2
SNX14	0	1	1	0	0	0	0	0	#N/A	2
TF212	0	1	1	0	0	0	0	0	#N/A	2
NAC1	0	1	0	1	0	0	0	0	#N/A	2
CH60	0	1	0	0	1	0	0	0	#N/A	2
L2HDH	0	1	0	0	1	0	0	0	#N/A	2
MITOS	0	1	0	0	1	0	0	0	#N/A	2
PTPRF	0	1	0	0	1	0	0	0	#N/A	2
SRCR1	0	1	0	0	0	0	1	0	#N/A	2
SYAC	0	1	0	0	0	0	0	1	#N/A	2
NHLC3	0	0	1	1	0	0	0	0	#N/A	2
R213B	0	0	1	1	0	0	0	0	#N/A	2
GOSR2	0	0	1	0	1	0	0	0	#N/A	2
PIGT	0	0	1	0	1	0	0	0	#N/A	2
RHG07	0	0	1	0	1	0	0	0	#N/A	2
SUSD2	0	0	1	0	1	0	0	0	#N/A	2
TRI45	0	0	1	0	1	0	0	0	#N/A	2
IF4G3	0	0	1	0	0	1	0	0	#N/A	2
AGRL2	0	0	1	0	0	0	1	0	#N/A	2
LRP1	0	0	1	0	0	0	1	0	#N/A	2
NAL12	0	0	1	0	0	0	1	0	#N/A	2
SAMH1	0	0	1	0	0	0	1	0	#N/A	2
SLF1	0	0	1	0	0	0	1	0	#N/A	2
BRAT	0	0	1	0	0	0	0	1	#N/A	2
FCGBP	0	0	1	0	0	0	0	1	#N/A	2
GABR1	0	0	1	0	0	0	0	1	#N/A	2
HDHD3	0	0	0	1	1	0	0	0	#N/A	2
MESH1	0	0	0	1	1	0	0	0	#N/A	2
NUDT5	0	0	0	1	1	0	0	0	#N/A	2
PCCB	0	0	0	1	1	0	0	0	#N/A	2
PHF10	0	0	0	1	1	0	0	0	#N/A	2
SUCA	0	0	0	1	1	0	0	0	#N/A	2
M3K2	0	0	0	0	0	1	0	1	#N/A	2
PPR27	0	0	0	0	0	0	1	1	#N/A	2
5NTC	1	0	0	0	0	0	0	0	#N/A	1
A1I3	1	0	0	0	0	0	0	0	#N/A	1
ABCA5	1	0	0	0	0	0	0	0	#N/A	1
ABCC9	1	0	0	0	0	0	0	0	#N/A	1
ACTA	1	0	0	0	0	0	0	0	#N/A	1
AGAP1	1	0	0	0	0	0	0	0	#N/A	1
AGAP3	1	0	0	0	0	0	0	0	#N/A	1
AGRE2	1	0	0	0	0	0	0	0	#N/A	1
AGRE5	1	0	0	0	0	0	0	0	#N/A	1
AKR	1	0	0	0	0	0	0	0	#N/A	1
ALG11	1	0	0	0	0	0	0	0	#N/A	1
AMOL2	1	0	0	0	0	0	0	0	#N/A	1
AMT13	1	0	0	0	0	0	0	0	#N/A	1
AMT15	1	0	0	0	0	0	0	0	#N/A	1
AMT2	1	0	0	0	0	0	0	0	#N/A	1
ANR26	1	0	0	0	0	0	0	0	#N/A	1
APN1	1	0	0	0	0	0	0	0	#N/A	1
AR11	1	0	0	0	0	0	0	0	#N/A	1
ARSG	1	0	0	0	0	0	0	0	#N/A	1
ATG4A	1	0	0	0	0	0	0	0	#N/A	1
ATG4B	1	0	0	0	0	0	0	0	#N/A	1
ATLA1	1	0	0	0	0	0	0	0	#N/A	1
ATLA2	1	0	0	0	0	0	0	0	#N/A	1
ATLAS	1	0	0	0	0	0	0	0	#N/A	1
ATP7B	1	0	0	0	0	0	0	0	#N/A	1
BARK	1	0	0	0	0	0	0	0	#N/A	1
BDLP	1	0	0	0	0	0	0	0	#N/A	1
BGH2A	1	0	0	0	0	0	0	0	#N/A	1
BGLR	1	0	0	0	0	0	0	0	#N/A	1
BIN3D	1	0	0	0	0	0	0	0	#N/A	1
BROMI	1	0	0	0	0	0	0	0	#N/A	1
BRX1	1	0	0	0	0	0	0	0	#N/A	1
C524A	1	0	0	0	0	0	0	0	#N/A	1
CAD23	1	0	0	0	0	0	0	0	#N/A	1
CAH1	1	0	0	0	0	0	0	0	#N/A	1
CATA	1	0	0	0	0	0	0	0	#N/A	1
CATF	1	0	0	0	0	0	0	0	#N/A	1
CC134	1	0	0	0	0	0	0	0	#N/A	1
CD209	1	0	0	0	0	0	0	0	#N/A	1
CE112	1	0	0	0	0	0	0	0	#N/A	1
CELR	1	0	0	0	0	0	0	0	#N/A	1
CENPJ	1	0	0	0	0	0	0	0	#N/A	1
CERT	1	0	0	0	0	0	0	0	#N/A	1
CF298	1	0	0	0	0	0	0	0	#N/A	1
CFA95	1	0	0	0	0	0	0	0	#N/A	1
CFC	1	0	0	0	0	0	0	0	#N/A	1
CHM4C	1	0	0	0	0	0	0	0	#N/A	1
CKX10	1	0	0	0	0	0	0	0	#N/A	1
CL16A	1	0	0	0	0	0	0	0	#N/A	1
CLC4M	1	0	0	0	0	0	0	0	#N/A	1
CNTLN	1	0	0	0	0	0	0	0	#N/A	1
CNTN1	1	0	0	0	0	0	0	0	#N/A	1
CNTN6	1	0	0	0	0	0	0	0	#N/A	1
CP131	1	0	0	0	0	0	0	0	#N/A	1
CP39A	1	0	0	0	0	0	0	0	#N/A	1
CPSF4	1	0	0	0	0	0	0	0	#N/A	1
CPT2	1	0	0	0	0	0	0	0	#N/A	1
CR3L2	1	0	0	0	0	0	0	0	#N/A	1
CSK	1	0	0	0	0	0	0	0	#N/A	1
CSK2B	1	0	0	0	0	0	0	0	#N/A	1
CTHR1	1	0	0	0	0	0	0	0	#N/A	1
CTTB2	1	0	0	0	0	0	0	0	#N/A	1
CY561	1	0	0	0	0	0	0	0	#N/A	1
D42E1	1	0	0	0	0	0	0	0	#N/A	1
DAPK1	1	0	0	0	0	0	0	0	#N/A	1
DAPK3	1	0	0	0	0	0	0	0	#N/A	1
DEN4B	1	0	0	0	0	0	0	0	#N/A	1
DERL1	1	0	0	0	0	0	0	0	#N/A	1
DL	1	0	0	0	0	0	0	0	#N/A	1
DMD	1	0	0	0	0	0	0	0	#N/A	1
DPYS	1	0	0	0	0	0	0	0	#N/A	1
DRKD	1	0	0	0	0	0	0	0	#N/A	1
DS	1	0	0	0	0	0	0	0	#N/A	1
DSCAM	1	0	0	0	0	0	0	0	#N/A	1
DUS3	1	0	0	0	0	0	0	0	#N/A	1
DYH10	1	0	0	0	0	0	0	0	#N/A	1
DYH3	1	0	0	0	0	0	0	0	#N/A	1
DYH5	1	0	0	0	0	0	0	0	#N/A	1
ECHM	1	0	0	0	0	0	0	0	#N/A	1
EFCB6	1	0	0	0	0	0	0	0	#N/A	1
EI2BE	1	0	0	0	0	0	0	0	#N/A	1
ELMD3	1	0	0	0	0	0	0	0	#N/A	1
ELP2	1	0	0	0	0	0	0	0	#N/A	1
ELP4	1	0	0	0	0	0	0	0	#N/A	1
EPS15	1	0	0	0	0	0	0	0	#N/A	1
ERC6L	1	0	0	0	0	0	0	0	#N/A	1
ERG	1	0	0	0	0	0	0	0	#N/A	1
EXOS9	1	0	0	0	0	0	0	0	#N/A	1
EYA1	1	0	0	0	0	0	0	0	#N/A	1
EYS	1	0	0	0	0	0	0	0	#N/A	1
F102B	1	0	0	0	0	0	0	0	#N/A	1
F234A	1	0	0	0	0	0	0	0	#N/A	1
FAK1	1	0	0	0	0	0	0	0	#N/A	1
FARP2	1	0	0	0	0	0	0	0	#N/A	1
FBCD1	1	0	0	0	0	0	0	0	#N/A	1
FBCDA	1	0	0	0	0	0	0	0	#N/A	1
FBP1	1	0	0	0	0	0	0	0	#N/A	1
FBX42	1	0	0	0	0	0	0	0	#N/A	1
FCL	1	0	0	0	0	0	0	0	#N/A	1
FGD6	1	0	0	0	0	0	0	0	#N/A	1
FLNB	1	0	0	0	0	0	0	0	#N/A	1
FOCAD	1	0	0	0	0	0	0	0	#N/A	1
FXL19	1	0	0	0	0	0	0	0	#N/A	1
G3ST2	1	0	0	0	0	0	0	0	#N/A	1
G3ST3	1	0	0	0	0	0	0	0	#N/A	1
G6PE	1	0	0	0	0	0	0	0	#N/A	1
GALNS	1	0	0	0	0	0	0	0	#N/A	1
GGT1	1	0	0	0	0	0	0	0	#N/A	1
GLCTK	1	0	0	0	0	0	0	0	#N/A	1
GPTC4	1	0	0	0	0	0	0	0	#N/A	1
GRIA1	1	0	0	0	0	0	0	0	#N/A	1
GRWD1	1	0	0	0	0	0	0	0	#N/A	1
GTDC1	1	0	0	0	0	0	0	0	#N/A	1
GTPB2	1	0	0	0	0	0	0	0	#N/A	1
GUTQ	1	0	0	0	0	0	0	0	#N/A	1
H2AY	1	0	0	0	0	0	0	0	#N/A	1
HCF1	1	0	0	0	0	0	0	0	#N/A	1
HEM6	1	0	0	0	0	0	0	0	#N/A	1
HEXO1	1	0	0	0	0	0	0	0	#N/A	1
HGNAT	1	0	0	0	0	0	0	0	#N/A	1
HIPL1	1	0	0	0	0	0	0	0	#N/A	1
HIPL2	1	0	0	0	0	0	0	0	#N/A	1
HPSE1	1	0	0	0	0	0	0	0	#N/A	1
HS12B	1	0	0	0	0	0	0	0	#N/A	1
INVS	1	0	0	0	0	0	0	0	#N/A	1
IPO7	1	0	0	0	0	0	0	0	#N/A	1
IRAK4	1	0	0	0	0	0	0	0	#N/A	1
ITA7	1	0	0	0	0	0	0	0	#N/A	1
ITAV	1	0	0	0	0	0	0	0	#N/A	1
IVD	1	0	0	0	0	0	0	0	#N/A	1
K1109	1	0	0	0	0	0	0	0	#N/A	1
KCD17	1	0	0	0	0	0	0	0	#N/A	1
KCMA1	1	0	0	0	0	0	0	0	#N/A	1
KI21A	1	0	0	0	0	0	0	0	#N/A	1
KI21B	1	0	0	0	0	0	0	0	#N/A	1
KPEL	1	0	0	0	0	0	0	0	#N/A	1
KPSF5	1	0	0	0	0	0	0	0	#N/A	1
KPTN	1	0	0	0	0	0	0	0	#N/A	1
LIPG	1	0	0	0	0	0	0	0	#N/A	1
LMBD1	1	0	0	0	0	0	0	0	#N/A	1
LRC69	1	0	0	0	0	0	0	0	#N/A	1
LRRK1	1	0	0	0	0	0	0	0	#N/A	1
LTOR1	1	0	0	0	0	0	0	0	#N/A	1
LZIC	1	0	0	0	0	0	0	0	#N/A	1
M3K20	1	0	0	0	0	0	0	0	#N/A	1
M3K7	1	0	0	0	0	0	0	0	#N/A	1
MANBA	1	0	0	0	0	0	0	0	#N/A	1
MCATL	1	0	0	0	0	0	0	0	#N/A	1
MERTK	1	0	0	0	0	0	0	0	#N/A	1
MET	1	0	0	0	0	0	0	0	#N/A	1
MGT4A	1	0	0	0	0	0	0	0	#N/A	1
MGT4B	1	0	0	0	0	0	0	0	#N/A	1
MINP1	1	0	0	0	0	0	0	0	#N/A	1
MIOX	1	0	0	0	0	0	0	0	#N/A	1
MK07	1	0	0	0	0	0	0	0	#N/A	1
MLRP2	1	0	0	0	0	0	0	0	#N/A	1
MOM5	1	0	0	0	0	0	0	0	#N/A	1
MOXD1	1	0	0	0	0	0	0	0	#N/A	1
MRP7	1	0	0	0	0	0	0	0	#N/A	1
MTCH2	1	0	0	0	0	0	0	0	#N/A	1
MURF	1	0	0	0	0	0	0	0	#N/A	1
MVP	1	0	0	0	0	0	0	0	#N/A	1
MX2	1	0	0	0	0	0	0	0	#N/A	1
MY9AB	1	0	0	0	0	0	0	0	#N/A	1
MYCB2	1	0	0	0	0	0	0	0	#N/A	1
MYOF	1	0	0	0	0	0	0	0	#N/A	1
NEB1	1	0	0	0	0	0	0	0	#N/A	1
NEK4	1	0	0	0	0	0	0	0	#N/A	1
NEMP1	1	0	0	0	0	0	0	0	#N/A	1
NET1	1	0	0	0	0	0	0	0	#N/A	1
NMP1B	1	0	0	0	0	0	0	0	#N/A	1
OGFD1	1	0	0	0	0	0	0	0	#N/A	1
OXA1L	1	0	0	0	0	0	0	0	#N/A	1
OXND1	1	0	0	0	0	0	0	0	#N/A	1
OXSR1	1	0	0	0	0	0	0	0	#N/A	1
PAN1	1	0	0	0	0	0	0	0	#N/A	1
PARP6	1	0	0	0	0	0	0	0	#N/A	1
PCYOX	1	0	0	0	0	0	0	0	#N/A	1
PG2IP	1	0	0	0	0	0	0	0	#N/A	1
PGCA	1	0	0	0	0	0	0	0	#N/A	1
PIF6	1	0	0	0	0	0	0	0	#N/A	1
PKHL1	1	0	0	0	0	0	0	0	#N/A	1
PLA2R	1	0	0	0	0	0	0	0	#N/A	1
PLH8	1	0	0	0	0	0	0	0	#N/A	1
PLRG1	1	0	0	0	0	0	0	0	#N/A	1
PLXA1	1	0	0	0	0	0	0	0	#N/A	1
PMS1	1	0	0	0	0	0	0	0	#N/A	1
PREX2	1	0	0	0	0	0	0	0	#N/A	1
PRIC2	1	0	0	0	0	0	0	0	#N/A	1
PROT	1	0	0	0	0	0	0	0	#N/A	1
PRS10	1	0	0	0	0	0	0	0	#N/A	1
PTHD3	1	0	0	0	0	0	0	0	#N/A	1
QORX	1	0	0	0	0	0	0	0	#N/A	1
RAB1A	1	0	0	0	0	0	0	0	#N/A	1
RAB7L	1	0	0	0	0	0	0	0	#N/A	1
RAE1L	1	0	0	0	0	0	0	0	#N/A	1
RB32B	1	0	0	0	0	0	0	0	#N/A	1
RCKA	1	0	0	0	0	0	0	0	#N/A	1
RELN	1	0	0	0	0	0	0	0	#N/A	1
REV3L	1	0	0	0	0	0	0	0	#N/A	1
RFC3	1	0	0	0	0	0	0	0	#N/A	1
RHA78	1	0	0	0	0	0	0	0	#N/A	1
RHGBA	1	0	0	0	0	0	0	0	#N/A	1
RIPK1	1	0	0	0	0	0	0	0	#N/A	1
RIPK2	1	0	0	0	0	0	0	0	#N/A	1
RIT1	1	0	0	0	0	0	0	0	#N/A	1
RL10A	1	0	0	0	0	0	0	0	#N/A	1
RM45	1	0	0	0	0	0	0	0	#N/A	1
RN167	1	0	0	0	0	0	0	0	#N/A	1
RPGP2	1	0	0	0	0	0	0	0	#N/A	1
RXLT1	1	0	0	0	0	0	0	0	#N/A	1
S2529	1	0	0	0	0	0	0	0	#N/A	1
SARDH	1	0	0	0	0	0	0	0	#N/A	1
SC5A8	1	0	0	0	0	0	0	0	#N/A	1
SCUB2	1	0	0	0	0	0	0	0	#N/A	1
SEA	1	0	0	0	0	0	0	0	#N/A	1
SEM1A	1	0	0	0	0	0	0	0	#N/A	1
SEPT3	1	0	0	0	0	0	0	0	#N/A	1
SGF29	1	0	0	0	0	0	0	0	#N/A	1
SH319	1	0	0	0	0	0	0	0	#N/A	1
SLB	1	0	0	0	0	0	0	0	#N/A	1
SNR40	1	0	0	0	0	0	0	0	#N/A	1
SPN1	1	0	0	0	0	0	0	0	#N/A	1
SPT4A	1	0	0	0	0	0	0	0	#N/A	1
SPTN1	1	0	0	0	0	0	0	0	#N/A	1
SPTN5	1	0	0	0	0	0	0	0	#N/A	1
TB10A	1	0	0	0	0	0	0	0	#N/A	1
TB22A	1	0	0	0	0	0	0	0	#N/A	1
TECT3	1	0	0	0	0	0	0	0	#N/A	1
TENA	1	0	0	0	0	0	0	0	#N/A	1
THS7B	1	0	0	0	0	0	0	0	#N/A	1
TIE1	1	0	0	0	0	0	0	0	#N/A	1
TLL1	1	0	0	0	0	0	0	0	#N/A	1
TM104	1	0	0	0	0	0	0	0	#N/A	1
TM145	1	0	0	0	0	0	0	0	#N/A	1
TM9S4	1	0	0	0	0	0	0	0	#N/A	1
TMTC3	1	0	0	0	0	0	0	0	#N/A	1
TNR6B	1	0	0	0	0	0	0	0	#N/A	1
TPPC9	1	0	0	0	0	0	0	0	#N/A	1
TPST1	1	0	0	0	0	0	0	0	#N/A	1
TRIPC	1	0	0	0	0	0	0	0	#N/A	1
TRM1	1	0	0	0	0	0	0	0	#N/A	1
TRM11	1	0	0	0	0	0	0	0	#N/A	1
TRPD	1	0	0	0	0	0	0	0	#N/A	1
TSP1	1	0	0	0	0	0	0	0	#N/A	1
TTC5	1	0	0	0	0	0	0	0	#N/A	1
TTC8	1	0	0	0	0	0	0	0	#N/A	1
TTLL6	1	0	0	0	0	0	0	0	#N/A	1
UBE4A	1	0	0	0	0	0	0	0	#N/A	1
UBP2	1	0	0	0	0	0	0	0	#N/A	1
UFO	1	0	0	0	0	0	0	0	#N/A	1
ULK2	1	0	0	0	0	0	0	0	#N/A	1
UN5CL	1	0	0	0	0	0	0	0	#N/A	1
VWA3A	1	0	0	0	0	0	0	0	#N/A	1
WDR26	1	0	0	0	0	0	0	0	#N/A	1
WDR3	1	0	0	0	0	0	0	0	#N/A	1
XPO6A	1	0	0	0	0	0	0	0	#N/A	1
XPOT	1	0	0	0	0	0	0	0	#N/A	1
XRCC6	1	0	0	0	0	0	0	0	#N/A	1
XYLT	1	0	0	0	0	0	0	0	#N/A	1
Y1017	1	0	0	0	0	0	0	0	#N/A	1
Y1931	1	0	0	0	0	0	0	0	#N/A	1
Y5344	1	0	0	0	0	0	0	0	#N/A	1
Y733	1	0	0	0	0	0	0	0	#N/A	1
YD03	1	0	0	0	0	0	0	0	#N/A	1
YRDC	1	0	0	0	0	0	0	0	#N/A	1
YVNF	1	0	0	0	0	0	0	0	#N/A	1
YWOF	1	0	0	0	0	0	0	0	#N/A	1
ZBT44	1	0	0	0	0	0	0	0	#N/A	1
ZPR1	1	0	0	0	0	0	0	0	#N/A	1
2AAA	0	1	0	0	0	0	0	0	#N/A	1
ABHDD	0	1	0	0	0	0	0	0	#N/A	1
ABL1	0	1	0	0	0	0	0	0	#N/A	1
ADAS	0	1	0	0	0	0	0	0	#N/A	1
AIMP1	0	1	0	0	0	0	0	0	#N/A	1
AKIB1	0	1	0	0	0	0	0	0	#N/A	1
ANKHM	0	1	0	0	0	0	0	0	#N/A	1
AP1B1	0	1	0	0	0	0	0	0	#N/A	1
ARK1	0	1	0	0	0	0	0	0	#N/A	1
ATPI1	0	1	0	0	0	0	0	0	#N/A	1
BCP	0	1	0	0	0	0	0	0	#N/A	1
BOP1	0	1	0	0	0	0	0	0	#N/A	1
CA112	0	1	0	0	0	0	0	0	#N/A	1
CCD22	0	1	0	0	0	0	0	0	#N/A	1
CF206	0	1	0	0	0	0	0	0	#N/A	1
CFDP2	0	1	0	0	0	0	0	0	#N/A	1
CH601	0	1	0	0	0	0	0	0	#N/A	1
CHEC	0	1	0	0	0	0	0	0	#N/A	1
CIPKB	0	1	0	0	0	0	0	0	#N/A	1
CJ067	0	1	0	0	0	0	0	0	#N/A	1
CL004	0	1	0	0	0	0	0	0	#N/A	1
CLAP2	0	1	0	0	0	0	0	0	#N/A	1
COAE	0	1	0	0	0	0	0	0	#N/A	1
COG7	0	1	0	0	0	0	0	0	#N/A	1
COX11	0	1	0	0	0	0	0	0	#N/A	1
COX15	0	1	0	0	0	0	0	0	#N/A	1
CRT	0	1	0	0	0	0	0	0	#N/A	1
CSN3	0	1	0	0	0	0	0	0	#N/A	1
CTRO	0	1	0	0	0	0	0	0	#N/A	1
CUL4A	0	1	0	0	0	0	0	0	#N/A	1
DGAT1	0	1	0	0	0	0	0	0	#N/A	1
DI3L2	0	1	0	0	0	0	0	0	#N/A	1
DMBTL	0	1	0	0	0	0	0	0	#N/A	1
DYHC1	0	1	0	0	0	0	0	0	#N/A	1
ECM29	0	1	0	0	0	0	0	0	#N/A	1
EDR1	0	1	0	0	0	0	0	0	#N/A	1
EMS1	0	1	0	0	0	0	0	0	#N/A	1
ERDL6	0	1	0	0	0	0	0	0	#N/A	1
ERGI2	0	1	0	0	0	0	0	0	#N/A	1
EXD2	0	1	0	0	0	0	0	0	#N/A	1
FCNV1	0	1	0	0	0	0	0	0	#N/A	1
FEN1	0	1	0	0	0	0	0	0	#N/A	1
FMNL2	0	1	0	0	0	0	0	0	#N/A	1
FMNL3	0	1	0	0	0	0	0	0	#N/A	1
FSIP2	0	1	0	0	0	0	0	0	#N/A	1
FUZZY	0	1	0	0	0	0	0	0	#N/A	1
FYV1	0	1	0	0	0	0	0	0	#N/A	1
GARS	0	1	0	0	0	0	0	0	#N/A	1
GCP5	0	1	0	0	0	0	0	0	#N/A	1
GDT2	0	1	0	0	0	0	0	0	#N/A	1
GLCP	0	1	0	0	0	0	0	0	#N/A	1
GPTC3	0	1	0	0	0	0	0	0	#N/A	1
GTR8	0	1	0	0	0	0	0	0	#N/A	1
HBPA	0	1	0	0	0	0	0	0	#N/A	1
HIF1A	0	1	0	0	0	0	0	0	#N/A	1
ITCH	0	1	0	0	0	0	0	0	#N/A	1
KATL2	0	1	0	0	0	0	0	0	#N/A	1
KC1A	0	1	0	0	0	0	0	0	#N/A	1
KLDC1	0	1	0	0	0	0	0	0	#N/A	1
KLH15	0	1	0	0	0	0	0	0	#N/A	1
L3BPA	0	1	0	0	0	0	0	0	#N/A	1
LEG8	0	1	0	0	0	0	0	0	#N/A	1
LICH	0	1	0	0	0	0	0	0	#N/A	1
LMBD2	0	1	0	0	0	0	0	0	#N/A	1
LOXH1	0	1	0	0	0	0	0	0	#N/A	1
LOXL3	0	1	0	0	0	0	0	0	#N/A	1
MACA	0	1	0	0	0	0	0	0	#N/A	1
MALT	0	1	0	0	0	0	0	0	#N/A	1
MAP22	0	1	0	0	0	0	0	0	#N/A	1
MBD4	0	1	0	0	0	0	0	0	#N/A	1
MBTP1	0	1	0	0	0	0	0	0	#N/A	1
MDTC	0	1	0	0	0	0	0	0	#N/A	1
MED23	0	1	0	0	0	0	0	0	#N/A	1
MGAT2	0	1	0	0	0	0	0	0	#N/A	1
MIPR	0	1	0	0	0	0	0	0	#N/A	1
MO4L2	0	1	0	0	0	0	0	0	#N/A	1
MOB1B	0	1	0	0	0	0	0	0	#N/A	1
MPRI	0	1	0	0	0	0	0	0	#N/A	1
MTREX	0	1	0	0	0	0	0	0	#N/A	1
NAA50	0	1	0	0	0	0	0	0	#N/A	1
NAC2	0	1	0	0	0	0	0	0	#N/A	1
NCHL1	0	1	0	0	0	0	0	0	#N/A	1
NEK11	0	1	0	0	0	0	0	0	#N/A	1
NGN2	0	1	0	0	0	0	0	0	#N/A	1
NLRC4	0	1	0	0	0	0	0	0	#N/A	1
NODI	0	1	0	0	0	0	0	0	#N/A	1
NOLG	0	1	0	0	0	0	0	0	#N/A	1
NOSF	0	1	0	0	0	0	0	0	#N/A	1
NPNT	0	1	0	0	0	0	0	0	#N/A	1
NU205	0	1	0	0	0	0	0	0	#N/A	1
OBG	0	1	0	0	0	0	0	0	#N/A	1
OSGI2	0	1	0	0	0	0	0	0	#N/A	1
P20D2	0	1	0	0	0	0	0	0	#N/A	1
P2OX	0	1	0	0	0	0	0	0	#N/A	1
PAE5	0	1	0	0	0	0	0	0	#N/A	1
PAE9	0	1	0	0	0	0	0	0	#N/A	1
PAR15	0	1	0	0	0	0	0	0	#N/A	1
PLH14	0	1	0	0	0	0	0	0	#N/A	1
PLXB1	0	1	0	0	0	0	0	0	#N/A	1
PO22	0	1	0	0	0	0	0	0	#N/A	1
PPT1	0	1	0	0	0	0	0	0	#N/A	1
PPZD	0	1	0	0	0	0	0	0	#N/A	1
PR38A	0	1	0	0	0	0	0	0	#N/A	1
PR6AB	0	1	0	0	0	0	0	0	#N/A	1
PSN2	0	1	0	0	0	0	0	0	#N/A	1
PTAS	0	1	0	0	0	0	0	0	#N/A	1
PTN1	0	1	0	0	0	0	0	0	#N/A	1
PTPRT	0	1	0	0	0	0	0	0	#N/A	1
PUB70	0	1	0	0	0	0	0	0	#N/A	1
RAB43	0	1	0	0	0	0	0	0	#N/A	1
RBM41	0	1	0	0	0	0	0	0	#N/A	1
RED	0	1	0	0	0	0	0	0	#N/A	1
RGS3	0	1	0	0	0	0	0	0	#N/A	1
RH39	0	1	0	0	0	0	0	0	#N/A	1
RHBG	0	1	0	0	0	0	0	0	#N/A	1
RIBBA	0	1	0	0	0	0	0	0	#N/A	1
RIOK2	0	1	0	0	0	0	0	0	#N/A	1
RL15	0	1	0	0	0	0	0	0	#N/A	1
RL19	0	1	0	0	0	0	0	0	#N/A	1
RN157	0	1	0	0	0	0	0	0	#N/A	1
ROR1	0	1	0	0	0	0	0	0	#N/A	1
RPGF4	0	1	0	0	0	0	0	0	#N/A	1
RS27A	0	1	0	0	0	0	0	0	#N/A	1
RSMI	0	1	0	0	0	0	0	0	#N/A	1
S35F5	0	1	0	0	0	0	0	0	#N/A	1
S39A9	0	1	0	0	0	0	0	0	#N/A	1
SAC1	0	1	0	0	0	0	0	0	#N/A	1
SCAP	0	1	0	0	0	0	0	0	#N/A	1
SCOT1	0	1	0	0	0	0	0	0	#N/A	1
SD11	0	1	0	0	0	0	0	0	#N/A	1
SECA	0	1	0	0	0	0	0	0	#N/A	1
SIM2	0	1	0	0	0	0	0	0	#N/A	1
SIS8	0	1	0	0	0	0	0	0	#N/A	1
SMC1A	0	1	0	0	0	0	0	0	#N/A	1
SUBV	0	1	0	0	0	0	0	0	#N/A	1
SUCB2	0	1	0	0	0	0	0	0	#N/A	1
SYV	0	1	0	0	0	0	0	0	#N/A	1
TBCK	0	1	0	0	0	0	0	0	#N/A	1
TKRA	0	1	0	0	0	0	0	0	#N/A	1
TM107	0	1	0	0	0	0	0	0	#N/A	1
TM9S1	0	1	0	0	0	0	0	0	#N/A	1
TMEDE	0	1	0	0	0	0	0	0	#N/A	1
TPPC8	0	1	0	0	0	0	0	0	#N/A	1
TPR	0	1	0	0	0	0	0	0	#N/A	1
TRAF6	0	1	0	0	0	0	0	0	#N/A	1
UBIP1	0	1	0	0	0	0	0	0	#N/A	1
UBXN4	0	1	0	0	0	0	0	0	#N/A	1
UN13A	0	1	0	0	0	0	0	0	#N/A	1
UN13B	0	1	0	0	0	0	0	0	#N/A	1
UN93A	0	1	0	0	0	0	0	0	#N/A	1
UNC40	0	1	0	0	0	0	0	0	#N/A	1
VATC1	0	1	0	0	0	0	0	0	#N/A	1
VNN1	0	1	0	0	0	0	0	0	#N/A	1
VPS16	0	1	0	0	0	0	0	0	#N/A	1
VPS35	0	1	0	0	0	0	0	0	#N/A	1
VPS53	0	1	0	0	0	0	0	0	#N/A	1
WDR75	0	1	0	0	0	0	0	0	#N/A	1
Y3917	0	1	0	0	0	0	0	0	#N/A	1
Y4HO	0	1	0	0	0	0	0	0	#N/A	1
Y5516	0	1	0	0	0	0	0	0	#N/A	1
Y8045	0	1	0	0	0	0	0	0	#N/A	1
Y9853	0	1	0	0	0	0	0	0	#N/A	1
Y9871	0	1	0	0	0	0	0	0	#N/A	1
YDCC	0	1	0	0	0	0	0	0	#N/A	1
YKFC	0	1	0	0	0	0	0	0	#N/A	1
YPDA	0	1	0	0	0	0	0	0	#N/A	1
YQL5	0	1	0	0	0	0	0	0	#N/A	1
YR826	0	1	0	0	0	0	0	0	#N/A	1
AB9A	0	0	1	0	0	0	0	0	#N/A	1
ABCA1	0	0	1	0	0	0	0	0	#N/A	1
ABCB1	0	0	1	0	0	0	0	0	#N/A	1
ACDSB	0	0	1	0	0	0	0	0	#N/A	1
ADDA	0	0	1	0	0	0	0	0	#N/A	1
ADRO	0	0	1	0	0	0	0	0	#N/A	1
AGAL	0	0	1	0	0	0	0	0	#N/A	1
AGAL3	0	0	1	0	0	0	0	0	#N/A	1
AKR1	0	0	1	0	0	0	0	0	#N/A	1
ALG14	0	0	1	0	0	0	0	0	#N/A	1
AMY1	0	0	1	0	0	0	0	0	#N/A	1
ANFY1	0	0	1	0	0	0	0	0	#N/A	1
ANXA4	0	0	1	0	0	0	0	0	#N/A	1
API5	0	0	1	0	0	0	0	0	#N/A	1
AR6P4	0	0	1	0	0	0	0	0	#N/A	1
ARMC1	0	0	1	0	0	0	0	0	#N/A	1
ARMD3	0	0	1	0	0	0	0	0	#N/A	1
ARP2A	0	0	1	0	0	0	0	0	#N/A	1
ASAP3	0	0	1	0	0	0	0	0	#N/A	1
ASO	0	0	1	0	0	0	0	0	#N/A	1
ATG9A	0	0	1	0	0	0	0	0	#N/A	1
ATPA	0	0	1	0	0	0	0	0	#N/A	1
B3GNL	0	0	1	0	0	0	0	0	#N/A	1
BBS1	0	0	1	0	0	0	0	0	#N/A	1
BTG1	0	0	1	0	0	0	0	0	#N/A	1
BVGS	0	0	1	0	0	0	0	0	#N/A	1
BXL4	0	0	1	0	0	0	0	0	#N/A	1
BXL6	0	0	1	0	0	0	0	0	#N/A	1
C163A	0	0	1	0	0	0	0	0	#N/A	1
CAA43	0	0	1	0	0	0	0	0	#N/A	1
CAR11	0	0	1	0	0	0	0	0	#N/A	1
CASP1	0	0	1	0	0	0	0	0	#N/A	1
CC137	0	0	1	0	0	0	0	0	#N/A	1
CFA20	0	0	1	0	0	0	0	0	#N/A	1
CHSS1	0	0	1	0	0	0	0	0	#N/A	1
CLA1A	0	0	1	0	0	0	0	0	#N/A	1
CLP1L	0	0	1	0	0	0	0	0	#N/A	1
CLPC	0	0	1	0	0	0	0	0	#N/A	1
CNOT9	0	0	1	0	0	0	0	0	#N/A	1
COBT	0	0	1	0	0	0	0	0	#N/A	1
COG8	0	0	1	0	0	0	0	0	#N/A	1
CPNE8	0	0	1	0	0	0	0	0	#N/A	1
CPRA	0	0	1	0	0	0	0	0	#N/A	1
CSPC	0	0	1	0	0	0	0	0	#N/A	1
CUL3B	0	0	1	0	0	0	0	0	#N/A	1
DCAF6	0	0	1	0	0	0	0	0	#N/A	1
DCAF7	0	0	1	0	0	0	0	0	#N/A	1
DCTD	0	0	1	0	0	0	0	0	#N/A	1
DCTN1	0	0	1	0	0	0	0	0	#N/A	1
DCYD1	0	0	1	0	0	0	0	0	#N/A	1
DEN11	0	0	1	0	0	0	0	0	#N/A	1
DGKI	0	0	1	0	0	0	0	0	#N/A	1
DHHB	0	0	1	0	0	0	0	0	#N/A	1
DIP2C	0	0	1	0	0	0	0	0	#N/A	1
DJB11	0	0	1	0	0	0	0	0	#N/A	1
DLG1L	0	0	1	0	0	0	0	0	#N/A	1
DMDA	0	0	1	0	0	0	0	0	#N/A	1
DNAJ	0	0	1	0	0	0	0	0	#N/A	1
DOC10	0	0	1	0	0	0	0	0	#N/A	1
DPH1	0	0	1	0	0	0	0	0	#N/A	1
DPH2	0	0	1	0	0	0	0	0	#N/A	1
DPOD1	0	0	1	0	0	0	0	0	#N/A	1
DSLE	0	0	1	0	0	0	0	0	#N/A	1
DTX3L	0	0	1	0	0	0	0	0	#N/A	1
DYH2	0	0	1	0	0	0	0	0	#N/A	1
DYH6	0	0	1	0	0	0	0	0	#N/A	1
DYHB	0	0	1	0	0	0	0	0	#N/A	1
EF2	0	0	1	0	0	0	0	0	#N/A	1
EGCSE	0	0	1	0	0	0	0	0	#N/A	1
EGFR	0	0	1	0	0	0	0	0	#N/A	1
EI24	0	0	1	0	0	0	0	0	#N/A	1
ELTD	0	0	1	0	0	0	0	0	#N/A	1
ENOA	0	0	1	0	0	0	0	0	#N/A	1
ERBB3	0	0	1	0	0	0	0	0	#N/A	1
ESF2	0	0	1	0	0	0	0	0	#N/A	1
EXTL2	0	0	1	0	0	0	0	0	#N/A	1
F120B	0	0	1	0	0	0	0	0	#N/A	1
FCN1B	0	0	1	0	0	0	0	0	#N/A	1
FIMB	0	0	1	0	0	0	0	0	#N/A	1
FOXP1	0	0	1	0	0	0	0	0	#N/A	1
FOXP2	0	0	1	0	0	0	0	0	#N/A	1
FUR2	0	0	1	0	0	0	0	0	#N/A	1
FURIN	0	0	1	0	0	0	0	0	#N/A	1
G6PI	0	0	1	0	0	0	0	0	#N/A	1
GALE	0	0	1	0	0	0	0	0	#N/A	1
GALT1	0	0	1	0	0	0	0	0	#N/A	1
GALT2	0	0	1	0	0	0	0	0	#N/A	1
GAS6	0	0	1	0	0	0	0	0	#N/A	1
GATL9	0	0	1	0	0	0	0	0	#N/A	1
GEFJ	0	0	1	0	0	0	0	0	#N/A	1
GLPK	0	0	1	0	0	0	0	0	#N/A	1
GLPT2	0	0	1	0	0	0	0	0	#N/A	1
GLRX5	0	0	1	0	0	0	0	0	#N/A	1
GLYA	0	0	1	0	0	0	0	0	#N/A	1
GP157	0	0	1	0	0	0	0	0	#N/A	1
GRAP	0	0	1	0	0	0	0	0	#N/A	1
GRB2	0	0	1	0	0	0	0	0	#N/A	1
GREA	0	0	1	0	0	0	0	0	#N/A	1
GRM4	0	0	1	0	0	0	0	0	#N/A	1
GTAA	0	0	1	0	0	0	0	0	#N/A	1
GXCDD	0	0	1	0	0	0	0	0	#N/A	1
HEAT4	0	0	1	0	0	0	0	0	#N/A	1
HECD1	0	0	1	0	0	0	0	0	#N/A	1
HMCN2	0	0	1	0	0	0	0	0	#N/A	1
HS12A	0	0	1	0	0	0	0	0	#N/A	1
HZG	0	0	1	0	0	0	0	0	#N/A	1
IF4H	0	0	1	0	0	0	0	0	#N/A	1
IF5	0	0	1	0	0	0	0	0	#N/A	1
IKKE	0	0	1	0	0	0	0	0	#N/A	1
INO1A	0	0	1	0	0	0	0	0	#N/A	1
ISP6	0	0	1	0	0	0	0	0	#N/A	1
ISTB	0	0	1	0	0	0	0	0	#N/A	1
ITB1	0	0	1	0	0	0	0	0	#N/A	1
ITB2	0	0	1	0	0	0	0	0	#N/A	1
ITBX	0	0	1	0	0	0	0	0	#N/A	1
JAM1	0	0	1	0	0	0	0	0	#N/A	1
JHD1	0	0	1	0	0	0	0	0	#N/A	1
JNK	0	0	1	0	0	0	0	0	#N/A	1
K0754	0	0	1	0	0	0	0	0	#N/A	1
KEX1A	0	0	1	0	0	0	0	0	#N/A	1
KGP1	0	0	1	0	0	0	0	0	#N/A	1
KI16B	0	0	1	0	0	0	0	0	#N/A	1
KIFA3	0	0	1	0	0	0	0	0	#N/A	1
KL98A	0	0	1	0	0	0	0	0	#N/A	1
KLDC2	0	0	1	0	0	0	0	0	#N/A	1
KUNIG	0	0	1	0	0	0	0	0	#N/A	1
KXDL1	0	0	1	0	0	0	0	0	#N/A	1
L6	0	0	1	0	0	0	0	0	#N/A	1
LAC4	0	0	1	0	0	0	0	0	#N/A	1
LAC9	0	0	1	0	0	0	0	0	#N/A	1
LATA	0	0	1	0	0	0	0	0	#N/A	1
LCTA	0	0	1	0	0	0	0	0	#N/A	1
LIAS	0	0	1	0	0	0	0	0	#N/A	1
LOGL9	0	0	1	0	0	0	0	0	#N/A	1
LPXH	0	0	1	0	0	0	0	0	#N/A	1
LRIG2	0	0	1	0	0	0	0	0	#N/A	1
LRP4	0	0	1	0	0	0	0	0	#N/A	1
LTN1	0	0	1	0	0	0	0	0	#N/A	1
LUTA	0	0	1	0	0	0	0	0	#N/A	1
LUXA2	0	0	1	0	0	0	0	0	#N/A	1
MAF1	0	0	1	0	0	0	0	0	#N/A	1
MATN1	0	0	1	0	0	0	0	0	#N/A	1
MCM7A	0	0	1	0	0	0	0	0	#N/A	1
MGAT1	0	0	1	0	0	0	0	0	#N/A	1
MIEN1	0	0	1	0	0	0	0	0	#N/A	1
MITD1	0	0	1	0	0	0	0	0	#N/A	1
MIX23	0	0	1	0	0	0	0	0	#N/A	1
MOT2	0	0	1	0	0	0	0	0	#N/A	1
MPCP	0	0	1	0	0	0	0	0	#N/A	1
MSPD2	0	0	1	0	0	0	0	0	#N/A	1
MTMRA	0	0	1	0	0	0	0	0	#N/A	1
MUC18	0	0	1	0	0	0	0	0	#N/A	1
NAAA	0	0	1	0	0	0	0	0	#N/A	1
NAS39	0	0	1	0	0	0	0	0	#N/A	1
NBR1	0	0	1	0	0	0	0	0	#N/A	1
NDUS3	0	0	1	0	0	0	0	0	#N/A	1
NECA1	0	0	1	0	0	0	0	0	#N/A	1
NED4L	0	0	1	0	0	0	0	0	#N/A	1
NEK8	0	0	1	0	0	0	0	0	#N/A	1
NGB2	0	0	1	0	0	0	0	0	#N/A	1
NPD1	0	0	1	0	0	0	0	0	#N/A	1
NPRL2	0	0	1	0	0	0	0	0	#N/A	1
NRAM1	0	0	1	0	0	0	0	0	#N/A	1
NSF	0	0	1	0	0	0	0	0	#N/A	1
NSP5	0	0	1	0	0	0	0	0	#N/A	1
OST48	0	0	1	0	0	0	0	0	#N/A	1
P210L	0	0	1	0	0	0	0	0	#N/A	1
P5CR1	0	0	1	0	0	0	0	0	#N/A	1
PAAJ	0	0	1	0	0	0	0	0	#N/A	1
PAHX	0	0	1	0	0	0	0	0	#N/A	1
PATS1	0	0	1	0	0	0	0	0	#N/A	1
PCDBE	0	0	1	0	0	0	0	0	#N/A	1
PDC6I	0	0	1	0	0	0	0	0	#N/A	1
PDIA1	0	0	1	0	0	0	0	0	#N/A	1
PELET	0	0	1	0	0	0	0	0	#N/A	1
PFD5	0	0	1	0	0	0	0	0	#N/A	1
PGBD2	0	0	1	0	0	0	0	0	#N/A	1
PHO23	0	0	1	0	0	0	0	0	#N/A	1
PIEZ2	0	0	1	0	0	0	0	0	#N/A	1
PLD2	0	0	1	0	0	0	0	0	#N/A	1
PLDB	0	0	1	0	0	0	0	0	#N/A	1
PLDZ1	0	0	1	0	0	0	0	0	#N/A	1
PLXA2	0	0	1	0	0	0	0	0	#N/A	1
PMPG	0	0	1	0	0	0	0	0	#N/A	1
POC5	0	0	1	0	0	0	0	0	#N/A	1
POGK	0	0	1	0	0	0	0	0	#N/A	1
POLX	0	0	1	0	0	0	0	0	#N/A	1
POLY	0	0	1	0	0	0	0	0	#N/A	1
POMT2	0	0	1	0	0	0	0	0	#N/A	1
PP6R3	0	0	1	0	0	0	0	0	#N/A	1
PQQB	0	0	1	0	0	0	0	0	#N/A	1
PRPS1	0	0	1	0	0	0	0	0	#N/A	1
PTBP1	0	0	1	0	0	0	0	0	#N/A	1
PTN21	0	0	1	0	0	0	0	0	#N/A	1
PYRG	0	0	1	0	0	0	0	0	#N/A	1
PYRG2	0	0	1	0	0	0	0	0	#N/A	1
QCR8	0	0	1	0	0	0	0	0	#N/A	1
RAB2B	0	0	1	0	0	0	0	0	#N/A	1
RAB6	0	0	1	0	0	0	0	0	#N/A	1
RAC1A	0	0	1	0	0	0	0	0	#N/A	1
RACA	0	0	1	0	0	0	0	0	#N/A	1
RAG3F	0	0	1	0	0	0	0	0	#N/A	1
RAPH1	0	0	1	0	0	0	0	0	#N/A	1
RBCR	0	0	1	0	0	0	0	0	#N/A	1
RGPS2	0	0	1	0	0	0	0	0	#N/A	1
RHG24	0	0	1	0	0	0	0	0	#N/A	1
RL10	0	0	1	0	0	0	0	0	#N/A	1
RLK90	0	0	1	0	0	0	0	0	#N/A	1
RN5A	0	0	1	0	0	0	0	0	#N/A	1
RPC6	0	0	1	0	0	0	0	0	#N/A	1
RRP12	0	0	1	0	0	0	0	0	#N/A	1
RS28	0	0	1	0	0	0	0	0	#N/A	1
RU17	0	0	1	0	0	0	0	0	#N/A	1
RUBIC	0	0	1	0	0	0	0	0	#N/A	1
S15A4	0	0	1	0	0	0	0	0	#N/A	1
S18B1	0	0	1	0	0	0	0	0	#N/A	1
SANBR	0	0	1	0	0	0	0	0	#N/A	1
SAP	0	0	1	0	0	0	0	0	#N/A	1
SAV2	0	0	1	0	0	0	0	0	#N/A	1
SC23A	0	0	1	0	0	0	0	0	#N/A	1
SDE3	0	0	1	0	0	0	0	0	#N/A	1
SDK	0	0	1	0	0	0	0	0	#N/A	1
SDK1	0	0	1	0	0	0	0	0	#N/A	1
SECD	0	0	1	0	0	0	0	0	#N/A	1
SENP3	0	0	1	0	0	0	0	0	#N/A	1
SH3G3	0	0	1	0	0	0	0	0	#N/A	1
SIM12	0	0	1	0	0	0	0	0	#N/A	1
SIR5B	0	0	1	0	0	0	0	0	#N/A	1
SMG5	0	0	1	0	0	0	0	0	#N/A	1
SPF27	0	0	1	0	0	0	0	0	#N/A	1
STX8	0	0	1	0	0	0	0	0	#N/A	1
SYFA	0	0	1	0	0	0	0	0	#N/A	1
T701	0	0	1	0	0	0	0	0	#N/A	1
TBC17	0	0	1	0	0	0	0	0	#N/A	1
TBC19	0	0	1	0	0	0	0	0	#N/A	1
TBD	0	0	1	0	0	0	0	0	#N/A	1
TBK1	0	0	1	0	0	0	0	0	#N/A	1
TCB2	0	0	1	0	0	0	0	0	#N/A	1
TF21	0	0	1	0	0	0	0	0	#N/A	1
TF2B	0	0	1	0	0	0	0	0	#N/A	1
THIO	0	0	1	0	0	0	0	0	#N/A	1
THTM	0	0	1	0	0	0	0	0	#N/A	1
TIPIN	0	0	1	0	0	0	0	0	#N/A	1
TLCD4	0	0	1	0	0	0	0	0	#N/A	1
TLE3B	0	0	1	0	0	0	0	0	#N/A	1
TLL2	0	0	1	0	0	0	0	0	#N/A	1
TM147	0	0	1	0	0	0	0	0	#N/A	1
TM199	0	0	1	0	0	0	0	0	#N/A	1
TM41A	0	0	1	0	0	0	0	0	#N/A	1
TMLH	0	0	1	0	0	0	0	0	#N/A	1
TOC34	0	0	1	0	0	0	0	0	#N/A	1
TOLIP	0	0	1	0	0	0	0	0	#N/A	1
TOP3B	0	0	1	0	0	0	0	0	#N/A	1
TPRG1	0	0	1	0	0	0	0	0	#N/A	1
TRAF2	0	0	1	0	0	0	0	0	#N/A	1
TRI17	0	0	1	0	0	0	0	0	#N/A	1
TRI33	0	0	1	0	0	0	0	0	#N/A	1
TRI37	0	0	1	0	0	0	0	0	#N/A	1
TRIM3	0	0	1	0	0	0	0	0	#N/A	1
TRXB	0	0	1	0	0	0	0	0	#N/A	1
TTC23	0	0	1	0	0	0	0	0	#N/A	1
UBIQP	0	0	1	0	0	0	0	0	#N/A	1
UBP24	0	0	1	0	0	0	0	0	#N/A	1
UTP20	0	0	1	0	0	0	0	0	#N/A	1
V246	0	0	1	0	0	0	0	0	#N/A	1
VAMP7	0	0	1	0	0	0	0	0	#N/A	1
VATA2	0	0	1	0	0	0	0	0	#N/A	1
VGLU3	0	0	1	0	0	0	0	0	#N/A	1
VKT2	0	0	1	0	0	0	0	0	#N/A	1
VKT3	0	0	1	0	0	0	0	0	#N/A	1
VKT5	0	0	1	0	0	0	0	0	#N/A	1
VKT6	0	0	1	0	0	0	0	0	#N/A	1
VP13B	0	0	1	0	0	0	0	0	#N/A	1
VP35L	0	0	1	0	0	0	0	0	#N/A	1
VTXB	0	0	1	0	0	0	0	0	#N/A	1
VWKA	0	0	1	0	0	0	0	0	#N/A	1
Y1201	0	0	1	0	0	0	0	0	#N/A	1
Y132A	0	0	1	0	0	0	0	0	#N/A	1
Y1717	0	0	1	0	0	0	0	0	#N/A	1
Y4MH	0	0	1	0	0	0	0	0	#N/A	1
Y4SN	0	0	1	0	0	0	0	0	#N/A	1
Y4WF	0	0	1	0	0	0	0	0	#N/A	1
Y8923	0	0	1	0	0	0	0	0	#N/A	1
YCU1	0	0	1	0	0	0	0	0	#N/A	1
YCX91	0	0	1	0	0	0	0	0	#N/A	1
YFMJ	0	0	1	0	0	0	0	0	#N/A	1
YI31B	0	0	1	0	0	0	0	0	#N/A	1
YOR6	0	0	1	0	0	0	0	0	#N/A	1
YQMA	0	0	1	0	0	0	0	0	#N/A	1
ZMY12	0	0	1	0	0	0	0	0	#N/A	1
ZMYM2	0	0	1	0	0	0	0	0	#N/A	1
ZN862	0	0	1	0	0	0	0	0	#N/A	1
ZNG1A	0	0	1	0	0	0	0	0	#N/A	1
AB17B	0	0	0	1	0	0	0	0	#N/A	1
ABCAC	0	0	0	1	0	0	0	0	#N/A	1
ACMSD	0	0	0	1	0	0	0	0	#N/A	1
ACPM	0	0	0	1	0	0	0	0	#N/A	1
ACSM4	0	0	0	1	0	0	0	0	#N/A	1
AFG1L	0	0	0	1	0	0	0	0	#N/A	1
AFG32	0	0	0	1	0	0	0	0	#N/A	1
AMACR	0	0	0	1	0	0	0	0	#N/A	1
AMAL	0	0	0	1	0	0	0	0	#N/A	1
ARF	0	0	0	1	0	0	0	0	#N/A	1
ASGL1	0	0	0	1	0	0	0	0	#N/A	1
B9D2	0	0	0	1	0	0	0	0	#N/A	1
CDHR2	0	0	0	1	0	0	0	0	#N/A	1
CH60A	0	0	0	1	0	0	0	0	#N/A	1
CNDP2	0	0	0	1	0	0	0	0	#N/A	1
CPLN1	0	0	0	1	0	0	0	0	#N/A	1
CTR2	0	0	0	1	0	0	0	0	#N/A	1
CTU1	0	0	0	1	0	0	0	0	#N/A	1
DCMC	0	0	0	1	0	0	0	0	#N/A	1
DGLB	0	0	0	1	0	0	0	0	#N/A	1
DPYD	0	0	0	1	0	0	0	0	#N/A	1
EAA3	0	0	0	1	0	0	0	0	#N/A	1
ECHA	0	0	0	1	0	0	0	0	#N/A	1
EFGM	0	0	0	1	0	0	0	0	#N/A	1
ETFA	0	0	0	1	0	0	0	0	#N/A	1
FLNA	0	0	0	1	0	0	0	0	#N/A	1
GBF1	0	0	0	1	0	0	0	0	#N/A	1
GMPR2	0	0	0	1	0	0	0	0	#N/A	1
HACD2	0	0	0	1	0	0	0	0	#N/A	1
HTR1B	0	0	0	1	0	0	0	0	#N/A	1
HUNKA	0	0	0	1	0	0	0	0	#N/A	1
IDE	0	0	0	1	0	0	0	0	#N/A	1
IF4A	0	0	0	1	0	0	0	0	#N/A	1
KALRN	0	0	0	1	0	0	0	0	#N/A	1
LICI2	0	0	0	1	0	0	0	0	#N/A	1
LIN1	0	0	0	1	0	0	0	0	#N/A	1
LUCI	0	0	0	1	0	0	0	0	#N/A	1
M2GD	0	0	0	1	0	0	0	0	#N/A	1
MA2B1	0	0	0	1	0	0	0	0	#N/A	1
MEMO1	0	0	0	1	0	0	0	0	#N/A	1
MFSD9	0	0	0	1	0	0	0	0	#N/A	1
MPPB	0	0	0	1	0	0	0	0	#N/A	1
NAC3	0	0	0	1	0	0	0	0	#N/A	1
NDUS2	0	0	0	1	0	0	0	0	#N/A	1
NFASC	0	0	0	1	0	0	0	0	#N/A	1
NFS1	0	0	0	1	0	0	0	0	#N/A	1
NFT1	0	0	0	1	0	0	0	0	#N/A	1
NNTM	0	0	0	1	0	0	0	0	#N/A	1
NOMO1	0	0	0	1	0	0	0	0	#N/A	1
P3H1	0	0	0	1	0	0	0	0	#N/A	1
P3H3	0	0	0	1	0	0	0	0	#N/A	1
PC11Y	0	0	0	1	0	0	0	0	#N/A	1
PCCA	0	0	0	1	0	0	0	0	#N/A	1
PCD15	0	0	0	1	0	0	0	0	#N/A	1
PHIP	0	0	0	1	0	0	0	0	#N/A	1
POLR	0	0	0	1	0	0	0	0	#N/A	1
PPR21	0	0	0	1	0	0	0	0	#N/A	1
PYR1	0	0	0	1	0	0	0	0	#N/A	1
RBM39	0	0	0	1	0	0	0	0	#N/A	1
RRFM	0	0	0	1	0	0	0	0	#N/A	1
RS11	0	0	0	1	0	0	0	0	#N/A	1
RS6	0	0	0	1	0	0	0	0	#N/A	1
RUFY1	0	0	0	1	0	0	0	0	#N/A	1
RUFY2	0	0	0	1	0	0	0	0	#N/A	1
SRK3	0	0	0	1	0	0	0	0	#N/A	1
STK11	0	0	0	1	0	0	0	0	#N/A	1
SUCHY	0	0	0	1	0	0	0	0	#N/A	1
SYCC	0	0	0	1	0	0	0	0	#N/A	1
SYCM	0	0	0	1	0	0	0	0	#N/A	1
SYFB	0	0	0	1	0	0	0	0	#N/A	1
SYK	0	0	0	1	0	0	0	0	#N/A	1
SYLM	0	0	0	1	0	0	0	0	#N/A	1
TGM1	0	0	0	1	0	0	0	0	#N/A	1
WDR49	0	0	0	1	0	0	0	0	#N/A	1
ZFN2A	0	0	0	1	0	0	0	0	#N/A	1
ZFN2B	0	0	0	1	0	0	0	0	#N/A	1
ABCA4	0	0	0	0	1	0	0	0	#N/A	1
ABCA9	0	0	0	0	1	0	0	0	#N/A	1
ACP7	0	0	0	0	1	0	0	0	#N/A	1
AIF1	0	0	0	0	1	0	0	0	#N/A	1
AL1L1	0	0	0	0	1	0	0	0	#N/A	1
ANR40	0	0	0	0	1	0	0	0	#N/A	1
APKC	0	0	0	0	1	0	0	0	#N/A	1
APX1	0	0	0	0	1	0	0	0	#N/A	1
ARI1A	0	0	0	0	1	0	0	0	#N/A	1
AT2L1	0	0	0	0	1	0	0	0	#N/A	1
CACP	0	0	0	0	1	0	0	0	#N/A	1
CATIN	0	0	0	0	1	0	0	0	#N/A	1
CDHR1	0	0	0	0	1	0	0	0	#N/A	1
COPIA	0	0	0	0	1	0	0	0	#N/A	1
CP20A	0	0	0	0	1	0	0	0	#N/A	1
CYSK1	0	0	0	0	1	0	0	0	#N/A	1
DDI1	0	0	0	0	1	0	0	0	#N/A	1
DLL4	0	0	0	0	1	0	0	0	#N/A	1
DPS1	0	0	0	0	1	0	0	0	#N/A	1
DXO	0	0	0	0	1	0	0	0	#N/A	1
EAA2	0	0	0	0	1	0	0	0	#N/A	1
EDIL3	0	0	0	0	1	0	0	0	#N/A	1
EGRAP	0	0	0	0	1	0	0	0	#N/A	1
EPA4A	0	0	0	0	1	0	0	0	#N/A	1
EPHX4	0	0	0	0	1	0	0	0	#N/A	1
EXT2	0	0	0	0	1	0	0	0	#N/A	1
GCDH	0	0	0	0	1	0	0	0	#N/A	1
GCSH	0	0	0	0	1	0	0	0	#N/A	1
GFPT2	0	0	0	0	1	0	0	0	#N/A	1
GLUCM	0	0	0	0	1	0	0	0	#N/A	1
HID1	0	0	0	0	1	0	0	0	#N/A	1
HMLL	0	0	0	0	1	0	0	0	#N/A	1
HPPD	0	0	0	0	1	0	0	0	#N/A	1
K319L	0	0	0	0	1	0	0	0	#N/A	1
LENG8	0	0	0	0	1	0	0	0	#N/A	1
LGSN	0	0	0	0	1	0	0	0	#N/A	1
LONM	0	0	0	0	1	0	0	0	#N/A	1
MCEE	0	0	0	0	1	0	0	0	#N/A	1
MDR2	0	0	0	0	1	0	0	0	#N/A	1
MED1	0	0	0	0	1	0	0	0	#N/A	1
MFS11	0	0	0	0	1	0	0	0	#N/A	1
MICU2	0	0	0	0	1	0	0	0	#N/A	1
MICU3	0	0	0	0	1	0	0	0	#N/A	1
MSRA	0	0	0	0	1	0	0	0	#N/A	1
MYO1A	0	0	0	0	1	0	0	0	#N/A	1
NADK	0	0	0	0	1	0	0	0	#N/A	1
NICA	0	0	0	0	1	0	0	0	#N/A	1
NUD11	0	0	0	0	1	0	0	0	#N/A	1
NUP85	0	0	0	0	1	0	0	0	#N/A	1
PCD16	0	0	0	0	1	0	0	0	#N/A	1
PCSK5	0	0	0	0	1	0	0	0	#N/A	1
PH4H	0	0	0	0	1	0	0	0	#N/A	1
PSB3	0	0	0	0	1	0	0	0	#N/A	1
PSD13	0	0	0	0	1	0	0	0	#N/A	1
PUR1	0	0	0	0	1	0	0	0	#N/A	1
PUR2	0	0	0	0	1	0	0	0	#N/A	1
PXDN1	0	0	0	0	1	0	0	0	#N/A	1
RALY	0	0	0	0	1	0	0	0	#N/A	1
RFA1	0	0	0	0	1	0	0	0	#N/A	1
RIMC1	0	0	0	0	1	0	0	0	#N/A	1
RL5	0	0	0	0	1	0	0	0	#N/A	1
RUNX2	0	0	0	0	1	0	0	0	#N/A	1
RXRGA	0	0	0	0	1	0	0	0	#N/A	1
RXRGB	0	0	0	0	1	0	0	0	#N/A	1
S12A9	0	0	0	0	1	0	0	0	#N/A	1
S6A13	0	0	0	0	1	0	0	0	#N/A	1
SC6A5	0	0	0	0	1	0	0	0	#N/A	1
SCOT	0	0	0	0	1	0	0	0	#N/A	1
SDHAA	0	0	0	0	1	0	0	0	#N/A	1
SH2D5	0	0	0	0	1	0	0	0	#N/A	1
SREK1	0	0	0	0	1	0	0	0	#N/A	1
STA13	0	0	0	0	1	0	0	0	#N/A	1
SYHM	0	0	0	0	1	0	0	0	#N/A	1
SYMC	0	0	0	0	1	0	0	0	#N/A	1
T2AG	0	0	0	0	1	0	0	0	#N/A	1
TCPA	0	0	0	0	1	0	0	0	#N/A	1
TIGRB	0	0	0	0	1	0	0	0	#N/A	1
TIM	0	0	0	0	1	0	0	0	#N/A	1
TPPC1	0	0	0	0	1	0	0	0	#N/A	1
TRAF7	0	0	0	0	1	0	0	0	#N/A	1
TT39B	0	0	0	0	1	0	0	0	#N/A	1
UPP1	0	0	0	0	1	0	0	0	#N/A	1
USP	0	0	0	0	1	0	0	0	#N/A	1
VKORL	0	0	0	0	1	0	0	0	#N/A	1
WASL	0	0	0	0	1	0	0	0	#N/A	1
WDR97	0	0	0	0	1	0	0	0	#N/A	1
YMQ1	0	0	0	0	1	0	0	0	#N/A	1
YXEK	0	0	0	0	1	0	0	0	#N/A	1
ANR52	0	0	0	0	0	1	0	0	#N/A	1
ANR55	0	0	0	0	0	1	0	0	#N/A	1
ATP7A	0	0	0	0	0	1	0	0	#N/A	1
CHIN	0	0	0	0	0	1	0	0	#N/A	1
DSCL	0	0	0	0	0	1	0	0	#N/A	1
IF4G1	0	0	0	0	0	1	0	0	#N/A	1
LAMA1	0	0	0	0	0	1	0	0	#N/A	1
MICA3	0	0	0	0	0	1	0	0	#N/A	1
MORN1	0	0	0	0	0	1	0	0	#N/A	1
MTMR9	0	0	0	0	0	1	0	0	#N/A	1
RIOK1	0	0	0	0	0	1	0	0	#N/A	1
RTCB	0	0	0	0	0	1	0	0	#N/A	1
S41A2	0	0	0	0	0	1	0	0	#N/A	1
STAG2	0	0	0	0	0	1	0	0	#N/A	1
TESK2	0	0	0	0	0	1	0	0	#N/A	1
60A	0	0	0	0	0	0	1	0	#N/A	1
ABCG1	0	0	0	0	0	0	1	0	#N/A	1
ABCG2	0	0	0	0	0	0	1	0	#N/A	1
ABCG5	0	0	0	0	0	0	1	0	#N/A	1
ACSF4	0	0	0	0	0	0	1	0	#N/A	1
AGRG6	0	0	0	0	0	0	1	0	#N/A	1
AT2A1	0	0	0	0	0	0	1	0	#N/A	1
AT2A2	0	0	0	0	0	0	1	0	#N/A	1
ATC1	0	0	0	0	0	0	1	0	#N/A	1
BCL3	0	0	0	0	0	0	1	0	#N/A	1
BRK1B	0	0	0	0	0	0	1	0	#N/A	1
CHSTF	0	0	0	0	0	0	1	0	#N/A	1
CSN2	0	0	0	0	0	0	1	0	#N/A	1
CUL7	0	0	0	0	0	0	1	0	#N/A	1
CUL9	0	0	0	0	0	0	1	0	#N/A	1
CYLD	0	0	0	0	0	0	1	0	#N/A	1
D19L1	0	0	0	0	0	0	1	0	#N/A	1
DIX1A	0	0	0	0	0	0	1	0	#N/A	1
DLK1	0	0	0	0	0	0	1	0	#N/A	1
DPOE1	0	0	0	0	0	0	1	0	#N/A	1
DYH9	0	0	0	0	0	0	1	0	#N/A	1
E2AK2	0	0	0	0	0	0	1	0	#N/A	1
E2AK3	0	0	0	0	0	0	1	0	#N/A	1
ENO	0	0	0	0	0	0	1	0	#N/A	1
ENOG	0	0	0	0	0	0	1	0	#N/A	1
EPB1B	0	0	0	0	0	0	1	0	#N/A	1
EPI1	0	0	0	0	0	0	1	0	#N/A	1
ETFD	0	0	0	0	0	0	1	0	#N/A	1
FAHD1	0	0	0	0	0	0	1	0	#N/A	1
FAS	0	0	0	0	0	0	1	0	#N/A	1
FBW1B	0	0	0	0	0	0	1	0	#N/A	1
FZD7	0	0	0	0	0	0	1	0	#N/A	1
FZD7B	0	0	0	0	0	0	1	0	#N/A	1
GH7B	0	0	0	0	0	0	1	0	#N/A	1
GLSL	0	0	0	0	0	0	1	0	#N/A	1
GPX4	0	0	0	0	0	0	1	0	#N/A	1
HERC1	0	0	0	0	0	0	1	0	#N/A	1
HGV2	0	0	0	0	0	0	1	0	#N/A	1
HIG1A	0	0	0	0	0	0	1	0	#N/A	1
IF172	0	0	0	0	0	0	1	0	#N/A	1
INT7	0	0	0	0	0	0	1	0	#N/A	1
IQCB1	0	0	0	0	0	0	1	0	#N/A	1
KC1DA	0	0	0	0	0	0	1	0	#N/A	1
KC1E	0	0	0	0	0	0	1	0	#N/A	1
LAMC1	0	0	0	0	0	0	1	0	#N/A	1
LIN23	0	0	0	0	0	0	1	0	#N/A	1
LMA2L	0	0	0	0	0	0	1	0	#N/A	1
LMAN2	0	0	0	0	0	0	1	0	#N/A	1
MINY4	0	0	0	0	0	0	1	0	#N/A	1
MLKL	0	0	0	0	0	0	1	0	#N/A	1
MMAA	0	0	0	0	0	0	1	0	#N/A	1
MTG1	0	0	0	0	0	0	1	0	#N/A	1
MYO3B	0	0	0	0	0	0	1	0	#N/A	1
NCAM1	0	0	0	0	0	0	1	0	#N/A	1
NIT1	0	0	0	0	0	0	1	0	#N/A	1
NIT2	0	0	0	0	0	0	1	0	#N/A	1
NOTU2	0	0	0	0	0	0	1	0	#N/A	1
NUBPL	0	0	0	0	0	0	1	0	#N/A	1
PAAF1	0	0	0	0	0	0	1	0	#N/A	1
PIGL	0	0	0	0	0	0	1	0	#N/A	1
PIGP	0	0	0	0	0	0	1	0	#N/A	1
PNKP	0	0	0	0	0	0	1	0	#N/A	1
RA51A	0	0	0	0	0	0	1	0	#N/A	1
RAD52	0	0	0	0	0	0	1	0	#N/A	1
RFC1	0	0	0	0	0	0	1	0	#N/A	1
RLA0	0	0	0	0	0	0	1	0	#N/A	1
ROBO1	0	0	0	0	0	0	1	0	#N/A	1
RPAB2	0	0	0	0	0	0	1	0	#N/A	1
RPB2	0	0	0	0	0	0	1	0	#N/A	1
RPB3	0	0	0	0	0	0	1	0	#N/A	1
RS2	0	0	0	0	0	0	1	0	#N/A	1
SARAF	0	0	0	0	0	0	1	0	#N/A	1
SCP2	0	0	0	0	0	0	1	0	#N/A	1
SCUB3	0	0	0	0	0	0	1	0	#N/A	1
SPAG1	0	0	0	0	0	0	1	0	#N/A	1
SPX3	0	0	0	0	0	0	1	0	#N/A	1
SR140	0	0	0	0	0	0	1	0	#N/A	1
SRR	0	0	0	0	0	0	1	0	#N/A	1
SVOP	0	0	0	0	0	0	1	0	#N/A	1
SYSC	0	0	0	0	0	0	1	0	#N/A	1
TECT	0	0	0	0	0	0	1	0	#N/A	1
TFDP1	0	0	0	0	0	0	1	0	#N/A	1
TFDP2	0	0	0	0	0	0	1	0	#N/A	1
TM9S2	0	0	0	0	0	0	1	0	#N/A	1
TRI56	0	0	0	0	0	0	1	0	#N/A	1
TRI59	0	0	0	0	0	0	1	0	#N/A	1
TRPM6	0	0	0	0	0	0	1	0	#N/A	1
TTC37	0	0	0	0	0	0	1	0	#N/A	1
UBL7	0	0	0	0	0	0	1	0	#N/A	1
UBP33	0	0	0	0	0	0	1	0	#N/A	1
UBQL4	0	0	0	0	0	0	1	0	#N/A	1
WDR7	0	0	0	0	0	0	1	0	#N/A	1
YPD1	0	0	0	0	0	0	1	0	#N/A	1
ZDH17	0	0	0	0	0	0	1	0	#N/A	1
ZN277	0	0	0	0	0	0	1	0	#N/A	1
ANM2	0	0	0	0	0	0	0	1	#N/A	1
ANR16	0	0	0	0	0	0	0	1	#N/A	1
ANR44	0	0	0	0	0	0	0	1	#N/A	1
ANS1A	0	0	0	0	0	0	0	1	#N/A	1
APC	0	0	0	0	0	0	0	1	#N/A	1
B4GN3	0	0	0	0	0	0	0	1	#N/A	1
BLI	0	0	0	0	0	0	0	1	#N/A	1
BLM	0	0	0	0	0	0	0	1	#N/A	1
CCD93	0	0	0	0	0	0	0	1	#N/A	1
CF299	0	0	0	0	0	0	0	1	#N/A	1
CP46A	0	0	0	0	0	0	0	1	#N/A	1
CYSP1	0	0	0	0	0	0	0	1	#N/A	1
DNAI4	0	0	0	0	0	0	0	1	#N/A	1
EPHA3	0	0	0	0	0	0	0	1	#N/A	1
GABP2	0	0	0	0	0	0	0	1	#N/A	1
GARL3	0	0	0	0	0	0	0	1	#N/A	1
GPAT1	0	0	0	0	0	0	0	1	#N/A	1
GPKOW	0	0	0	0	0	0	0	1	#N/A	1
INT1	0	0	0	0	0	0	0	1	#N/A	1
ITSN1	0	0	0	0	0	0	0	1	#N/A	1
KSYK	0	0	0	0	0	0	0	1	#N/A	1
LITA	0	0	0	0	0	0	0	1	#N/A	1
M3K3	0	0	0	0	0	0	0	1	#N/A	1
MCES	0	0	0	0	0	0	0	1	#N/A	1
MMS19	0	0	0	0	0	0	0	1	#N/A	1
NEC2	0	0	0	0	0	0	0	1	#N/A	1
NHLC2	0	0	0	0	0	0	0	1	#N/A	1
NRARP	0	0	0	0	0	0	0	1	#N/A	1
PGBD3	0	0	0	0	0	0	0	1	#N/A	1
PLX2	0	0	0	0	0	0	0	1	#N/A	1
PLXB3	0	0	0	0	0	0	0	1	#N/A	1
PRS8	0	0	0	0	0	0	0	1	#N/A	1
PTPR2	0	0	0	0	0	0	0	1	#N/A	1
RA51C	0	0	0	0	0	0	0	1	#N/A	1
RAB8A	0	0	0	0	0	0	0	1	#N/A	1
RB11B	0	0	0	0	0	0	0	1	#N/A	1
RECQ1	0	0	0	0	0	0	0	1	#N/A	1
RL38	0	0	0	0	0	0	0	1	#N/A	1
RL40	0	0	0	0	0	0	0	1	#N/A	1
RPA2	0	0	0	0	0	0	0	1	#N/A	1
SPF45	0	0	0	0	0	0	0	1	#N/A	1
SPOLB	0	0	0	0	0	0	0	1	#N/A	1
SPTB2	0	0	0	0	0	0	0	1	#N/A	1
STT3B	0	0	0	0	0	0	0	1	#N/A	1
TM10A	0	0	0	0	0	0	0	1	#N/A	1
UBE3B	0	0	0	0	0	0	0	1	#N/A	1
USB1	0	0	0	0	0	0	0	1	#N/A	1
WRN	0	0	0	0	0	0	0	1	#N/A	1
ZN212	0	0	0	0	0	0	0	1	#N/A	1
