# Supplementary material for: Sponge genomes reveal a pre-metazoan origin of the sex determination toolkit and sex chromosomes
Source: Research Square preprint supplement (doi:10.21203/rs.3.rs-8554461/v1), 2026-02-12
Supplement: Supplementary file 8 [file 4ca2a13e04e1a9feaa0fecc0.xlsx]

## Sheet: Sheet1
	RADseq		WGS		RNASeq		Chromosome-level genome	Reference for the chromosome-level genome
Species	N females	N males	N females	N males	N females	N males
Axinella damicornis	5	3	3	3	4	3	YES	https://tolqc.cog.sanger.ac.uk/asg/sponges/Axinella_damicornis
Chondrosia reniformis	13	7	6	6	10	5	YES	Pita et al. 2025
Geodia barretti	5	3	-	-	2	1	NO	not available
Geodia hentscheli	4	3	-	-	4	2	NO	not available
Oscarella lobularis	7	7	3	3	3	6	YES	Riesgo et al. 2025
Phakellia ventilabrum	5	3	2	1	2	2	YES	Taboada et al., submitted
Petrosia ficiformis	7	5	3	3	5	3	YES	Steindler et al. 2025; https://wellcomeopenresearch.org/articles/10-450
Halichondria panicea	4	8	3	3	4	4	YES	https://tolqc.cog.sanger.ac.uk/asg/sponges/Halichondria_panicea
TOTAL	50	39	20	19	34	26

## Sheet: Sheet2
Geodia hentscheli	Sex	N sequences
Ghent-Vst_s-028-013B_female.1.fq	F
Ghent-Vst_s-032-006B_female.1.fq	F
Ghent-Vst_s-063-004B_female.1.fq	F
Ghent-Vst_s-080-003B_male.1.fq	M
Ghent-Vst_s-045-011B_male.1.fq	M
Ghent-Vst_s-041-003B_male.1.fq	M
Ghent-Vst_d-019-011B_female.1.fq	F
Ghent-SM_d-23-ROV12-11.1_male.1.fq	M
Ghent-SM_d-23-ROV12-11.2_female.1.fq	F
Ghent-SM_d-41-ROV19-11_female.1.fq	F
Geodia barretti	Sex	N sequences
Rosemary_Bank.14_female.1.fq.gz	F
Rosemary_Bank.16_female.1.fq.gz	F
Rosemary_Bank.17_female.1.fq.gz	F
Rosemary_Bank.7_female.1.fq.gz	F
Rosemary_Bank.8_female.1.fq.gz	F
Rosemary_Bank.12_male.1.fq.gz	M
Rosemary_Bank.15_male.1.fq.gz	M
Rosemary_Bank.6_male.1.fq.gz	M
Barents_Sea_imp.19_male.1.fq.gz	M
Barents_Sea_imp.17_female.1.fq.gz	F
Halichondria panicea	Sex	N sequences
Hp1A-F.1.fq	F	5402553
Hp11A-F.1.fq	F	3245774
Hp17A-F.1.fq	F	6664565
Hp30_2-F.1.fq	F	37151569
Hp20A-M.1.fq	M	2033150
Hp28_2-M.1.fq	M	4306721
Hp31_10-M.1.fq	M	830328
Hp31A-M.1.fq	M	8166660
Hp36_2-M.1.fq	M	26907875
Hp40_1-M.1.fq	M	9144621
Hp5A-M.1.fq	M	20405829
Hp6A-M.1.fq	M	1583948
Oscarella lobularis	Sex	N sequences
Osc_10_nap-F.fq	F	19840559
Osc_3_nap-F.fq	F	1857912
Osc_4_nap-F.fq	F	10636398
Osc_13_nap-M.fq	M	5870301
Osc1-M.fq	M	5211169
Osc3-M.fq	M	13386734
Osc_5_M.1	M	171700
Osc_11_nap-F.1	F	129566
