# Supplementary material for: Sponge genomes reveal a pre-metazoan origin of the sex determination toolkit and sex chromosomes
Source: Research Square preprint supplement (doi:10.21203/rs.3.rs-8554461/v1), 2026-02-12
Supplement: Supplementary file 9 [file 4eedcdf7035b43634ffffac7.xlsx]

## Sheet: SNPdensity_SexFindR_Chreni
scaf	base	mean_MvF_dif	Pvalue
OX359189.1	0	-0.045	0.513487
OX359189.1	100000	0.681667	0.10989
OX359189.1	200000	0.441667	0.254745
OX359189.1	300000	1.45	0.207792
OX359189.1	400000	1.115	0.021978
OX359189.1	500000	-0.473333	0.344655
OX359189.1	600000	-0.776667	0.282717
OX359189.1	700000	-0.286667	0.441558
OX359189.1	800000	1.29167	0.0599401
OX359189.1	900000	0.656667	0.297702
OX359189.1	1000000	0.663333	0.146853
OX359189.1	1100000	1.53	0.0849151
OX359189.1	1200000	1.31667	0.183816
OX359189.1	1300000	1.08	0.225774
OX359189.1	1400000	2.86	0.003996
OX359189.1	1500000	3.22333	0.012987
OX359189.1	1600000	1.35667	0.0749251
OX359189.1	1700000	-0.366667	0.340659
OX359189.1	1800000	1.36667	0.032967
OX359189.1	1900000	0.323333	0.371628
OX359189.1	2000000	0.301667	0.387612
OX359189.1	2100000	1.02	0.121878
OX359189.1	2200000	1.075	0.0959041
OX359189.1	2300000	1.50167	0.143856
OX359189.1	2400000	1.14333	0.0609391
OX359189.1	2500000	1.27833	0.251748
OX359189.1	2600000	0.565	0.364635
OX359189.1	2700000	0.41	0.368631
OX359189.1	2800000	1.13167	0.031968
OX359189.1	2900000	1.975	0.037962
OX359189.1	3000000	-0.711667	0.392607
OX359189.1	3100000	1.025	0.111888
OX359189.1	3200000	0.231667	0.388611
OX359189.1	3300000	0.241667	0.264735
OX359189.1	3400000	1.00833	0.133866
OX359189.1	3500000	0.55	0.366633
OX359189.1	3600000	0.175	0.358641
OX359189.1	3700000	0.655	0.190809
OX359189.1	3800000	0.803333	0.202797
OX359189.1	3900000	1.17667	0.151848
OX359189.1	4000000	0.916667	0.173826
OX359189.1	4100000	0.173333	0.361638
OX359189.1	4200000	-0.00333333	0.541459
OX359189.1	4300000	0.206667	0.252747
OX359189.1	4400000	0.148333	0.36963
OX359189.1	4500000	0.555	0.276723
OX359189.1	4600000	0.821667	0.102897
OX359189.1	4700000	0.433333	0.251748
OX359189.1	4800000	1.045	0.28971
OX359189.1	4900000	1.59	0.161838
OX359189.1	5000000	0.923333	0.290709
OX359189.1	5100000	0.195	0.457542
OX359189.1	5200000	-1.55333	0.104895
OX359189.1	5300000	0.97	0.040959
OX359189.1	5400000	-0.143333	0.333666
OX359189.1	5500000	0.466667	0.161838
OX359189.1	5600000	1.14333	0.195804
OX359189.1	5700000	3.41667	0.00899101
OX359189.1	5800000	2.22833	0.024975
OX359189.1	5900000	1.285	0.180819
OX359189.1	6000000	4.42333	0.030969
OX359189.1	6100000	2.51	0.035964
OX359189.1	6200000	2.10167	0.001998
OX359189.1	6300000	1.72833	0.011988
OX359189.1	6400000	0.906667	0.038961
OX359189.1	6500000	1.02833	0.002997
OX359189.1	6600000	-1.07167	0.366633
OX359189.1	6700000	3.36667	0.00799201
OX359189.1	6800000	1.775	0.111888
OX359189.1	6900000	2.42167	0.000999001
OX359189.1	7000000	0.938333	0.03996
OX359189.1	7100000	-0.296667	0.425574
OX359189.1	7200000	0.83	0.002997
OX359189.1	7300000	0.108333	0.458541
OX359189.1	7400000	0.63	0.28971
OX359189.1	7500000	1.32167	0.0839161
OX359189.1	7600000	1.61167	0.011988
OX359189.1	7700000	2.65333	0.045954
OX359189.1	7800000	-0.12	0.456543
OX359189.1	7900000	-0.298333	0.375624
OX359189.1	8000000	0.396667	0.360639
OX359189.1	8100000	1.53167	0.0639361
OX359189.1	8200000	3.075	0.001998
OX359189.1	8300000	2.23833	0.0599401
OX359189.1	8400000	3.52833	0.018981
OX359189.1	8500000	1.64833	0.017982
OX359189.1	8600000	1.02833	0.164835
OX359189.1	8700000	1.48833	0.0909091
OX359189.1	8800000	1.24	0.184815
OX359189.1	8900000	-0.273333	0.411588
OX359189.1	9000000	0.35	0.284715
OX359189.1	9100000	0.181667	0.3996
OX359189.1	9200000	0.775	0.160839
OX359189.1	9300000	1.65667	0.036963
OX359189.1	9400000	2.08167	0.00599401
OX359189.1	9500000	1.93167	0.004995
OX359189.1	9600000	1.55667	0.0569431
OX359189.1	9700000	0.823333	0.265734
OX359189.1	9800000	1.88833	0.0789211
OX359189.1	9900000	1.125	0.134865
OX359189.1	10000000	1.20833	0.127872
OX359189.1	10100000	2.015	0.000999001
OX359189.1	10200000	2.81833	0.0509491
OX359189.1	10300000	1.03833	0.004995
OX359189.1	10400000	0.0133333	0.185814
OX359190.1	0	0.228333	0.38961
OX359190.1	100000	1.34	0.00599401
OX359190.1	200000	0.95	0.015984
OX359190.1	300000	0.745	0.033966
OX359190.1	400000	-0.316667	0.481518
OX359190.1	500000	0.805	0.116883
OX359190.1	600000	2.25833	0.106893
OX359190.1	700000	1.47833	0.250749
OX359190.1	800000	1.625	0.177822
OX359190.1	900000	1.17833	0.015984
OX359190.1	1000000	0.795	0.036963
OX359190.1	1100000	0.943333	0.000999001
OX359190.1	1200000	1.36833	0.034965
OX359190.1	1300000	0.901667	0.038961
OX359190.1	1400000	0.861667	0.02997
OX359190.1	1500000	0.708333	0.200799
OX359190.1	1600000	1.19833	0.016983
OX359190.1	1700000	1.36167	0.0579421
OX359190.1	1800000	2.02333	0.00799201
OX359190.1	1900000	0.281667	0.232767
OX359190.1	2000000	1.12333	0.010989
OX359190.1	2100000	0.636667	0.048951
OX359190.1	2200000	-0.246667	0.397602
OX359190.1	2300000	0.583333	0.176823
OX359190.1	2400000	1.635	0.003996
OX359190.1	2500000	1.11167	0.003996
OX359190.1	2600000	0.788333	0.0929071
OX359190.1	2700000	1.29833	0.215784
OX359190.1	2800000	-0.0583333	0.494505
OX359190.1	2900000	0.451667	0.245754
OX359190.1	3000000	3.32	0.003996
OX359190.1	3100000	1.33	0.106893
OX359190.1	3200000	0.211667	0.27972
OX359190.1	3300000	1.80333	0.0929071
OX359190.1	3400000	-0.178333	0.481518
OX359190.1	3500000	-1.65167	0.122877
OX359190.1	3600000	-0.8	0.383616
OX359190.1	3700000	-1.02833	0.292707
OX359190.1	3800000	-1.34833	0.393606
OX359190.1	3900000	-3.02167	0.028971
OX359190.1	4000000	-3.215	0.022977
OX359190.1	4100000	-2.61833	0.011988
OX359190.1	4200000	-2.41833	0.017982
OX359190.1	4300000	-2.96667	0.011988
OX359190.1	4400000	-2.52833	0.017982
OX359190.1	4500000	-1.875	0.0609391
OX359190.1	4600000	-2.57333	0.116883
OX359190.1	4700000	-3.29667	0.0679321
OX359190.1	4800000	-2.645	0.032967
OX359190.1	4900000	-1.175	0.133866
OX359190.1	5000000	-0.411667	0.461538
OX359190.1	5100000	-0.426667	0.413586
OX359190.1	5200000	-0.406667	0.352647
OX359190.1	5300000	-0.193333	0.401598
OX359190.1	5400000	-0.291667	0.121878
OX359190.1	5500000	-0.435	0.0949051
OX359190.1	5600000	-0.461667	0.153846
OX359190.1	5700000	-0.325	0.267732
OX359190.1	5800000	-0.576667	0.332667
OX359190.1	5900000	-0.551667	0.204795
OX359190.1	6000000	-0.416667	0.412587
OX359190.1	6100000	-0.303333	0.407592
OX359190.1	6200000	-5.63667	0.003996
OX359190.1	6300000	-2.70333	0.14985
OX359190.1	6400000	-1.89167	0.226773
OX359190.1	6500000	-1.32833	0.277722
OX359190.1	6600000	-1.72167	0.246753
OX359190.1	6700000	-1.24667	0.140859
OX359190.1	6800000	-1.17167	0.150849
OX359190.1	6900000	-0.691667	0.228771
OX359190.1	7000000	0.101667	0.466533
OX359190.1	7100000	2	0.0509491
OX359190.1	7200000	1.035	0.0649351
OX359190.1	7300000	0.456667	0.264735
OX359190.1	7400000	0.36	0.352647
OX359190.1	7500000	-0.606667	0.317682
OX359190.1	7600000	0.0166667	0.513487
OX359190.1	7700000	0.766667	0.0769231
OX359190.1	7800000	0.381667	0.236763
OX359190.1	7900000	1.345	0.0689311
OX359190.1	8000000	3.44333	0.000999001
OX359190.1	8100000	2.38	0.001998
OX359190.1	8200000	1.9	0.000999001
OX359190.1	8300000	-0.171667	0.335664
OX359190.1	8400000	1.05	0.017982
OX359190.1	8500000	1.14333	0.105894
OX359190.1	8600000	1.845	0.030969
OX359190.1	8700000	1.665	0.0609391
OX359190.1	8800000	2.435	0.045954
OX359190.1	8900000	1.845	0.037962
OX359190.1	9000000	0.823333	0.301698
OX359190.1	9100000	0.913333	0.164835
OX359190.1	9200000	2.57667	0.027972
OX359190.1	9300000	1.70167	0.010989
OX359190.1	9400000	3.71333	0.000999001
OX359190.1	9500000	1.53833	0.038961
OX359190.1	9600000	0.908333	0.222777
OX359190.1	9700000	2.42667	0.003996
OX359190.1	9800000	0.676667	0.037962
OX359190.1	9900000	0.575	0.142857
OX359190.1	10000000	3.19333	0.02997
OX359190.1	10100000	1.12833	0.048951
OX359190.1	10200000	1.18833	0.041958
OX359191.1	0	0.296667	0.370629
OX359191.1	100000	-0.0333333	0.512488
OX359191.1	200000	-1.09	0.112887
OX359191.1	300000	0.396667	0.354645
OX359191.1	400000	0.363333	0.373626
OX359191.1	500000	0.0516667	0.467532
OX359191.1	600000	1.685	0.0609391
OX359191.1	700000	1.35	0.00899101
OX359191.1	800000	1.59167	0.00899101
OX359191.1	900000	0.285	0.30969
OX359191.1	1000000	2.965	0.004995
OX359191.1	1100000	0.266667	0.374625
OX359191.1	1200000	0.721667	0.181818
OX359191.1	1300000	1.73667	0.20979
OX359191.1	1400000	2.17	0.123876
OX359191.1	1500000	-0.458333	0.22977
OX359191.1	1600000	0.685	0.196803
OX359191.1	1700000	1.33667	0.0669331
OX359191.1	1800000	0.97	0.0689311
OX359191.1	1900000	2.675	0.00799201
OX359191.1	2000000	2.735	0.11988
OX359191.1	2100000	1.45667	0.016983
OX359191.1	2200000	1.44667	0.145854
OX359191.1	2300000	2.20667	0.000999001
OX359191.1	2400000	1.575	0.0639361
OX359191.1	2500000	0.03	0.460539
OX359191.1	2600000	0.09	0.156843
OX359191.1	2700000	0.175	0.00799201
OX359191.1	2800000	-0.105	0.385614
OX359191.1	2900000	-0.335	0.133866
OX359191.1	3000000	0.0233333	0.357642
OX359191.1	3100000	0.0333333	0.372627
OX359191.1	3200000	0.0933333	0.168831
OX359191.1	3300000	0.183333	0.015984
OX359191.1	3400000	0.148333	0.00999001
OX359191.1	3500000	0.166667	0.00799201
OX359191.1	3600000	0.005	0.438561
OX359191.1	3700000	0.0433333	0.280719
OX359191.1	3800000	0.151667	0.004995
OX359191.1	3900000	0.143333	0.0619381
OX359191.1	4000000	0.118333	0.02997
OX359191.1	4100000	0.131667	0.035964
OX359191.1	4200000	-0.02	0.403596
OX359191.1	4300000	-0.0366667	0.347652
OX359191.1	4400000	-0.196667	0.426573
OX359191.1	4500000	-0.468333	0.356643
OX359191.1	4600000	0.106667	0.503497
OX359191.1	4700000	-0.618333	0.368631
OX359191.1	4800000	-0.81	0.357642
OX359191.1	4900000	-0.276667	0.333666
OX359191.1	5000000	-0.705	0.287712
OX359191.1	5100000	1.07167	0.15984
OX359191.1	5200000	3.24	0.115884
OX359191.1	5300000	2.325	0.142857
OX359191.1	5400000	0.673333	0.277722
OX359191.1	5500000	0.0316667	0.464535
OX359191.1	5600000	3.025	0.025974
OX359191.1	5700000	1.06667	0.002997
OX359191.1	5800000	1.465	0.016983
OX359191.1	5900000	0.756667	0.305694
OX359191.1	6000000	-0.245	0.503497
OX359191.1	6100000	0.99	0.0829171
OX359191.1	6200000	3.71	0.016983
OX359191.1	6300000	1.24333	0.0669331
OX359191.1	6400000	0.836667	0.195804
OX359191.1	6500000	0.055	0.436563
OX359191.1	6600000	0.668333	0.327672
OX359191.1	6700000	-0.0616667	0.438561
OX359191.1	6800000	1.88333	0.0579421
OX359191.1	6900000	0.566667	0.172827
OX359191.1	7000000	-0.133333	0.412587
OX359191.1	7100000	1.14667	0.033966
OX359191.1	7200000	1.06167	0.016983
OX359191.1	7300000	0.275	0.362637
OX359191.1	7400000	1.39167	0.043956
OX359191.1	7500000	0.718333	0.123876
OX359191.1	7600000	0.918333	0.166833
OX359191.1	7700000	-0.195	0.393606
OX359191.1	7800000	0.726667	0.284715
OX359191.1	7900000	0.698333	0.193806
OX359191.1	8000000	0.406667	0.340659
OX359191.1	8100000	-1.76	0.226773
OX359191.1	8200000	1.315	0.0689311
OX359191.1	8300000	1.18333	0.12987
OX359191.1	8400000	0.00833333	0.482517
OX359191.1	8500000	1.01667	0.0769231
OX359191.1	8600000	1.06167	0.170829
OX359191.1	8700000	0.603333	0.0939061
OX359191.1	8800000	0.065	0.428571
OX359191.1	8900000	0.771667	0.322677
OX359191.1	9000000	-0.403333	0.315684
OX359191.1	9100000	0.386667	0.295704
OX359191.1	9200000	0.933333	0.0649351
OX359191.1	9300000	0.456667	0.268731
OX359191.1	9400000	0.035	0.394605
OX359192.1	0	0.41	0.383616
OX359192.1	100000	0.403333	0.243756
OX359192.1	200000	1.50667	0.0609391
OX359192.1	300000	0.245	0.393606
OX359192.1	400000	0.118333	0.418581
OX359192.1	500000	0.541667	0.331668
OX359192.1	600000	-1.13167	0.223776
OX359192.1	700000	-0.775	0.371628
OX359192.1	800000	-0.36	0.433566
OX359192.1	900000	1.68167	0.104895
OX359192.1	1000000	2.29667	0.028971
OX359192.1	1100000	1.12667	0.200799
OX359192.1	1200000	1.17	0.015984
OX359192.1	1300000	0.868333	0.211788
OX359192.1	1400000	0.0566667	0.453546
OX359192.1	1500000	1.08333	0.024975
OX359192.1	1600000	2.02667	0.003996
OX359192.1	1700000	1.50833	0.224775
OX359192.1	1800000	-1.07667	0.271728
OX359192.1	1900000	0.0316667	0.432567
OX359192.1	2000000	1.205	0.0689311
OX359192.1	2100000	1.18667	0.00799201
OX359192.1	2200000	0.485	0.154845
OX359192.1	2300000	0.96	0.214785
OX359192.1	2400000	-0.216667	0.353646
OX359192.1	2500000	0.695	0.14985
OX359192.1	2600000	0.615	0.150849
OX359192.1	2700000	-1.44333	0.00599401
OX359192.1	2800000	-0.54	0.335664
OX359192.1	2900000	1.28333	0.127872
OX359192.1	3000000	0.891667	0.293706
OX359192.1	3100000	2.37667	0.146853
OX359192.1	3200000	-0.0266667	0.445554
OX359192.1	3300000	-0.0633333	0.371628
OX359192.1	3400000	0.1	0.256743
OX359192.1	3500000	0.541667	0.002997
OX359192.1	3600000	-0.005	0.474525
OX359192.1	3700000	-0.408333	0.101898
OX359192.1	3800000	-0.198333	0.181818
OX359192.1	3900000	0.0666667	0.417582
OX359192.1	4000000	-0.113333	0.425574
OX359192.1	4100000	-0.0716667	0.428571
OX359192.1	4200000	0.19	0.124875
OX359192.1	4300000	-0.103333	0.474525
OX359192.1	4400000	0.00666667	0.497502
OX359192.1	4500000	2.90833	0.166833
OX359192.1	4600000	2.57833	0.182817
OX359192.1	4700000	2.10833	0.256743
OX359192.1	4800000	0.975	0.115884
OX359192.1	4900000	-0.01	0.51049
OX359192.1	5000000	1.50833	0.0529471
OX359192.1	5100000	1.53667	0.014985
OX359192.1	5200000	2.14667	0.031968
OX359192.1	5300000	0.273333	0.318681
OX359192.1	5400000	0.481667	0.287712
OX359192.1	5500000	-0.0633333	0.490509
OX359192.1	5600000	1.11333	0.004995
OX359192.1	5700000	1.16167	0.000999001
OX359192.1	5800000	0.695	0.141858
OX359192.1	5900000	0.801667	0.02997
OX359192.1	6000000	1.22667	0.0669331
OX359192.1	6100000	4.46167	0.000999001
OX359192.1	6200000	-0.295	0.197802
OX359192.1	6300000	1.16333	0.0559441
OX359192.1	6400000	1.51167	0.003996
OX359192.1	6500000	1.50333	0.00699301
OX359192.1	6600000	1.85333	0.187812
OX359192.1	6700000	0.64	0.112887
OX359192.1	6800000	0.583333	0.177822
OX359192.1	6900000	1.28833	0.013986
OX359192.1	7000000	1.11167	0.00799201
OX359192.1	7100000	0.0616667	0.448551
OX359192.1	7200000	0.286667	0.326673
OX359192.1	7300000	1.74833	0.040959
OX359192.1	7400000	0.258333	0.147852
OX359192.1	7500000	0.445	0.303696
OX359192.1	7600000	-0.358333	0.44955
OX359192.1	7700000	-0.426667	0.350649
OX359192.1	7800000	-0.19	0.428571
OX359192.1	7900000	0.125	0.415584
OX359192.1	8000000	0.578333	0.18981
OX359192.1	8100000	0.123333	0.3996
OX359192.1	8200000	-0.681667	0.223776
OX359192.1	8300000	0.123333	0.445554
OX359192.1	8400000	2.04667	0.01998
OX359192.1	8500000	0.32	0.292707
OX359192.1	8600000	1.17	0.141858
OX359192.1	8700000	0.216667	0.371628
OX359192.1	8800000	-0.381667	0.241758
OX359192.1	8900000	0.0183333	0.458541
OX359193.1	0	1.16833	0.021978
OX359193.1	100000	1.42833	0.110889
OX359193.1	200000	-0.216667	0.373626
OX359193.1	300000	0.256667	0.265734
OX359193.1	400000	2.06333	0.0559441
OX359193.1	500000	1.83167	0.0979021
OX359193.1	600000	0.123333	0.395604
OX359193.1	700000	0.0983333	0.456543
OX359193.1	800000	2.18833	0.102897
OX359193.1	900000	1.92	0.116883
OX359193.1	1000000	2.32333	0.0509491
OX359193.1	1100000	1.685	0.002997
OX359193.1	1200000	1.04167	0.03996
OX359193.1	1300000	0.535	0.174825
OX359193.1	1400000	0.393333	0.268731
OX359193.1	1500000	0.986667	0.0699301
OX359193.1	1600000	2.24667	0.000999001
OX359193.1	1700000	2.135	0.024975
OX359193.1	1800000	0.98	0.0859141
OX359193.1	1900000	0.99	0.035964
OX359193.1	2000000	1.01333	0.148851
OX359193.1	2100000	0.786667	0.220779
OX359193.1	2200000	1.89	0.017982
OX359193.1	2300000	1.53833	0.00799201
OX359193.1	2400000	0.998333	0.000999001
OX359193.1	2500000	0.935	0.0909091
OX359193.1	2600000	0.413333	0.23976
OX359193.1	2700000	0.456667	0.245754
OX359193.1	2800000	0.783333	0.138861
OX359193.1	2900000	1.33	0.0589411
OX359193.1	3000000	0.921667	0.112887
OX359193.1	3100000	0.321667	0.111888
OX359193.1	3200000	0.283333	0.132867
OX359193.1	3300000	0.528333	0.0939061
OX359193.1	3400000	0.24	0.241758
OX359193.1	3500000	1.19	0.0819181
OX359193.1	3600000	1.3	0.105894
OX359193.1	3700000	1.48	0.046953
OX359193.1	3800000	1.75667	0.0889111
OX359193.1	3900000	2.09833	0.148851
OX359193.1	4000000	0.313333	0.346653
OX359193.1	4100000	0.07	0.41958
OX359193.1	4200000	-0.205	0.423576
OX359193.1	4300000	2.41333	0.172827
OX359193.1	4400000	0.935	0.380619
OX359193.1	4500000	0.721667	0.340659
OX359193.1	4600000	0.83	0.248751
OX359193.1	4700000	0.25	0.424575
OX359193.1	4800000	0.79	0.135864
OX359193.1	4900000	0.833333	0.23976
OX359193.1	5000000	2.38	0.011988
OX359193.1	5100000	0.155	0.407592
OX359193.1	5200000	0.571667	0.131868
OX359193.1	5300000	-0.0683333	0.426573
OX359193.1	5400000	6.47333	0.000999001
OX359193.1	5500000	2.84167	0.032967
OX359193.1	5600000	-1.87333	0.212787
OX359193.1	5700000	0.391667	0.347652
OX359193.1	5800000	0.236667	0.435564
OX359193.1	5900000	-0.943333	0.141858
OX359193.1	6000000	-0.436667	0.217782
OX359193.1	6100000	0.181667	0.406593
OX359193.1	6200000	2.155	0.002997
OX359193.1	6300000	-0.348333	0.291708
OX359193.1	6400000	-2.03667	0.150849
OX359193.1	6500000	-0.99	0.0989011
OX359193.1	6600000	0.315	0.353646
OX359193.1	6700000	1.10667	0.034965
OX359193.1	6800000	0.3	0.302697
OX359193.1	6900000	-0.0533333	0.504496
OX359193.1	7000000	0.511667	0.188811
OX359193.1	7100000	1.595	0.0989011
OX359193.1	7200000	0.681667	0.110889
OX359193.1	7300000	-0.371667	0.331668
OX359193.1	7400000	-0.546667	0.044955
OX359193.1	7500000	0.341667	0.327672
OX359193.1	7600000	0.626667	0.111888
OX359193.1	7700000	1.29333	0.0889111
OX359193.1	7800000	0.615	0.206793
OX359193.1	7900000	0.518333	0.231768
OX359193.1	8000000	0.0383333	0.448551
OX359193.1	8100000	1.63333	0.0679321
OX359193.1	8200000	1.36667	0.00999001
OX359193.1	8300000	-0.246667	0.427572
OX359193.1	8400000	1.495	0.107892
OX359193.1	8500000	-0.0466667	0.508492
OX359193.1	8600000	1.10167	0.0569431
OX359193.1	8700000	-0.516667	0.262737
OX359193.1	8800000	0.0466667	0.128871
OX359194.1	0	0.965	0.171828
OX359194.1	100000	2.22	0.043956
OX359194.1	200000	2.29333	0.042957
OX359194.1	300000	-0.0683333	0.468531
OX359194.1	400000	0.543333	0.336663
OX359194.1	500000	1.89833	0.045954
OX359194.1	600000	1.405	0.041958
OX359194.1	700000	1.39667	0.015984
OX359194.1	800000	1.26	0.0909091
OX359194.1	900000	2.30167	0.00599401
OX359194.1	1000000	-0.0316667	0.496503
OX359194.1	1100000	1.74833	0.012987
OX359194.1	1200000	0.933333	0.153846
OX359194.1	1300000	0.8	0.20979
OX359194.1	1400000	1.19667	0.028971
OX359194.1	1500000	2.48667	0.0899101
OX359194.1	1600000	0.816667	0.190809
OX359194.1	1700000	2.28333	0.011988
OX359194.1	1800000	2.54833	0.00999001
OX359194.1	1900000	1.075	0.16983
OX359194.1	2000000	2.48833	0.11988
OX359194.1	2100000	2.66833	0.026973
OX359194.1	2200000	2.57833	0.00699301
OX359194.1	2300000	4.96667	0.000999001
OX359194.1	2400000	4.24333	0.00599401
OX359194.1	2500000	3.11333	0.000999001
OX359194.1	2600000	2.02667	0.044955
OX359194.1	2700000	1.52	0.0889111
OX359194.1	2800000	2.28	0.015984
OX359194.1	2900000	0.99	0.24975
OX359194.1	3000000	2.60333	0.002997
OX359194.1	3100000	1.65333	0.000999001
OX359194.1	3200000	-0.736667	0.164835
OX359194.1	3300000	0.208333	0.364635
OX359194.1	3400000	1.52167	0.036963
OX359194.1	3500000	-0.913333	0.341658
OX359194.1	3600000	-2.21	0.0749251
OX359194.1	3700000	-0.966667	0.224775
OX359194.1	3800000	-0.775	0.0909091
OX359194.1	3900000	0.825	0.131868
OX359194.1	4000000	0.975	0.0519481
OX359194.1	4100000	1.01	0.0849151
OX359194.1	4200000	0.491667	0.164835
OX359194.1	4300000	0.683333	0.11988
OX359194.1	4400000	0.91	0.136863
OX359194.1	4500000	0.763333	0.218781
OX359194.1	4600000	0.795	0.158841
OX359194.1	4700000	0.005	0.47952
OX359194.1	4800000	-0.633333	0.304695
OX359194.1	4900000	0.741667	0.218781
OX359194.1	5000000	-0.0733333	0.477522
OX359194.1	5100000	-0.436667	0.451548
OX359194.1	5200000	0.186667	0.42957
OX359194.1	5300000	2.06833	0.0539461
OX359194.1	5400000	1.17667	0.135864
OX359194.1	5500000	1.635	0.0909091
OX359194.1	5600000	2.57	0.01998
OX359194.1	5700000	2.785	0.028971
OX359194.1	5800000	3.56333	0.015984
OX359194.1	5900000	3.31	0.001998
OX359194.1	6000000	0.36	0.408591
OX359194.1	6100000	0.891667	0.147852
OX359194.1	6200000	0.275	0.302697
OX359194.1	6300000	0.825	0.160839
OX359194.1	6400000	2.03	0.015984
OX359194.1	6500000	1.31833	0.0649351
OX359194.1	6600000	0.813333	0.141858
OX359194.1	6700000	2.26333	0.035964
OX359194.1	6800000	1.56	0.0559441
OX359194.1	6900000	-2.82833	0.0819181
OX359194.1	7000000	-0.128333	0.423576
OX359194.1	7100000	-0.235	0.362637
OX359194.1	7200000	0.853333	0.0639361
OX359194.1	7300000	-0.3	0.2997
OX359194.1	7400000	0.958333	0.128871
OX359194.1	7500000	0.625	0.263736
OX359194.1	7600000	-0.733333	0.120879
OX359194.1	7700000	-0.32	0.282717
OX359194.1	7800000	-1.085	0.22977
OX359194.1	7900000	1.395	0.036963
OX359194.1	8000000	1.08333	0.030969
OX359194.1	8100000	1.51833	0.025974
OX359194.1	8200000	0.19	0.408591
OX359194.1	8300000	1.465	0.00599401
OX359194.1	8400000	0.975	0.0859141
OX359194.1	8500000	1.25167	0.100899
OX359194.1	8600000	0.69	0.212787
OX359194.1	8700000	0.195	0.212787
OX359195.1	0	0.51	0.186813
OX359195.1	100000	1.86333	0.108891
OX359195.1	200000	2.20333	0.0859141
OX359195.1	300000	-0.601667	0.396603
OX359195.1	400000	0.973333	0.31968
OX359195.1	500000	0.00666667	0.475524
OX359195.1	600000	0.398333	0.363636
OX359195.1	700000	2.74167	0.106893
OX359195.1	800000	2.16333	0.106893
OX359195.1	900000	1.03667	0.00699301
OX359195.1	1000000	1.24167	0.000999001
OX359195.1	1100000	1.30833	0.045954
OX359195.1	1200000	1.505	0.00999001
OX359195.1	1300000	1.835	0.0569431
OX359195.1	1400000	1.755	0.030969
OX359195.1	1500000	-0.281667	0.386613
OX359195.1	1600000	-0.573333	0.378621
OX359195.1	1700000	-0.54	0.374625
OX359195.1	1800000	2.76333	0.028971
OX359195.1	1900000	-1.10833	0.242757
OX359195.1	2000000	0.355	0.361638
OX359195.1	2100000	-1.46167	0.124875
OX359195.1	2200000	0.0333333	0.468531
OX359195.1	2300000	-0.323333	0.393606
OX359195.1	2400000	1.49333	0.0869131
OX359195.1	2500000	0.248333	0.407592
OX359195.1	2600000	0.721667	0.303696
OX359195.1	2700000	-0.518333	0.408591
OX359195.1	2800000	-0.421667	0.383616
OX359195.1	2900000	0.511667	0.356643
OX359195.1	3000000	-0.0233333	0.504496
OX359195.1	3100000	0.0233333	0.471528
OX359195.1	3200000	-0.235	0.376623
OX359195.1	3300000	-0.0483333	0.501499
OX359195.1	3400000	0.113333	0.407592
OX359195.1	3500000	0.343333	0.23976
OX359195.1	3600000	0.575	0.145854
OX359195.1	3700000	-0.0216667	0.483516
OX359195.1	3800000	0.198333	0.36963
OX359195.1	3900000	0.0916667	0.417582
OX359195.1	4000000	0.05	0.435564
OX359195.1	4100000	0.128333	0.417582
OX359195.1	4200000	-0.0233333	0.522478
OX359195.1	4300000	-0.268333	0.305694
OX359195.1	4400000	-0.605	0.432567
OX359195.1	4500000	0.14	0.413586
OX359195.1	4600000	1.295	0.237762
OX359195.1	4700000	-1.04333	0.330669
OX359195.1	4800000	0.045	0.483516
OX359195.1	4900000	1.865	0.0659341
OX359195.1	5000000	0.933333	0.162837
OX359195.1	5100000	-1.41167	0.234765
OX359195.1	5200000	0.186667	0.427572
OX359195.1	5300000	1.14333	0.0999001
OX359195.1	5400000	2.45	0.0669331
OX359195.1	5500000	-0.18	0.427572
OX359195.1	5600000	-0.566667	0.220779
OX359195.1	5700000	2.08833	0.001998
OX359195.1	5800000	0.696667	0.104895
OX359195.1	5900000	1.63833	0.00599401
OX359195.1	6000000	0.621667	0.0619381
OX359195.1	6100000	0.835	0.164835
OX359195.1	6200000	0.695	0.0509491
OX359195.1	6300000	2.00833	0.004995
OX359195.1	6400000	2.045	0.045954
OX359195.1	6500000	1.785	0.000999001
OX359195.1	6600000	1.82333	0.110889
OX359195.1	6700000	-0.298333	0.471528
OX359195.1	6800000	-0.711667	0.127872
OX359195.1	6900000	1.095	0.0679321
OX359195.1	7000000	0.695	0.270729
OX359195.1	7100000	1.15167	0.21978
OX359195.1	7200000	1.99333	0.016983
OX359195.1	7300000	1.25667	0.015984
OX359195.1	7400000	1.105	0.182817
OX359195.1	7500000	2.41167	0.015984
OX359195.1	7600000	-0.486667	0.275724
OX359195.1	7700000	1.03167	0.0749251
OX359195.1	7800000	1.34	0.0789211
OX359195.1	7900000	2.36	0.0599401
OX359195.1	8000000	-0.055	0.470529
OX359195.1	8100000	1.07667	0.036963
OX359195.1	8200000	-0.08	0.433566
OX359195.1	8300000	-0.115	0.478521
OX359195.1	8400000	-0.631667	0.226773
OX359196.1	0	0.568333	0.275724
OX359196.1	100000	1.08333	0.015984
OX359196.1	200000	2.40167	0.046953
OX359196.1	300000	-0.0566667	0.476523
OX359196.1	400000	0.351667	0.331668
OX359196.1	500000	-0.778333	0.348651
OX359196.1	600000	0.92	0.0789211
OX359196.1	700000	0.005	0.447552
OX359196.1	800000	2.005	0.035964
OX359196.1	900000	2.32667	0.047952
OX359196.1	1000000	2.325	0.00899101
OX359196.1	1100000	1.33333	0.177822
OX359196.1	1200000	1.93833	0.0619381
OX359196.1	1300000	1.205	0.0799201
OX359196.1	1400000	1.45	0.150849
OX359196.1	1500000	1.28	0.020979
OX359196.1	1600000	0.29	0.360639
OX359196.1	1700000	0.218333	0.397602
OX359196.1	1800000	-2.3	0.156843
OX359196.1	1900000	0.67	0.375624
OX359196.1	2000000	0.756667	0.317682
OX359196.1	2100000	-0.64	0.453546
OX359196.1	2200000	3.28833	0.038961
OX359196.1	2300000	-0.0783333	0.412587
OX359196.1	2400000	0.481667	0.176823
OX359196.1	2500000	0.475	0.145854
OX359196.1	2600000	0.0733333	0.453546
OX359196.1	2700000	0.213333	0.374625
OX359196.1	2800000	0.648333	0.03996
OX359196.1	2900000	0.71	0.102897
OX359196.1	3000000	0.538333	0.0989011
OX359196.1	3100000	0.136667	0.246753
OX359196.1	3200000	0.211667	0.263736
OX359196.1	3300000	0.243333	0.246753
OX359196.1	3400000	0.266667	0.266733
OX359196.1	3500000	0.678333	0.166833
OX359196.1	3600000	0.385	0.162837
OX359196.1	3700000	0.42	0.266733
OX359196.1	3800000	-0.173333	0.325674
OX359196.1	3900000	0.99	0.011988
OX359196.1	4000000	2.33667	0.002997
OX359196.1	4100000	0.966667	0.04995
OX359196.1	4200000	1.625	0.04995
OX359196.1	4300000	1.79	0.00699301
OX359196.1	4400000	1.35667	0.0759241
OX359196.1	4500000	1.04333	0.113886
OX359196.1	4600000	0.585	0.272727
OX359196.1	4700000	1.92167	0.016983
OX359196.1	4800000	-1.43333	0.102897
OX359196.1	4900000	2.09167	0.0549451
OX359196.1	5000000	2.42667	0.0509491
OX359196.1	5100000	3.67833	0.038961
OX359196.1	5200000	1.435	0.027972
OX359196.1	5300000	0.898333	0.043956
OX359196.1	5400000	0.88	0.143856
OX359196.1	5500000	1.215	0.152847
OX359196.1	5600000	0.926667	0.10989
OX359196.1	5700000	0.228333	0.432567
OX359196.1	5800000	0.486667	0.183816
OX359196.1	5900000	0.095	0.426573
OX359196.1	6000000	0.416667	0.190809
OX359196.1	6100000	0.681667	0.156843
OX359196.1	6200000	0.953333	0.011988
OX359196.1	6300000	-1.19167	0.0899101
OX359196.1	6400000	0.02	0.461538
OX359196.1	6500000	0.0916667	0.3996
OX359196.1	6600000	-0.693333	0.274725
OX359196.1	6700000	0.39	0.244755
OX359196.1	6800000	0.468333	0.194805
OX359196.1	6900000	1.27167	0.00799201
OX359196.1	7000000	0.733333	0.157842
OX359196.1	7100000	0.406667	0.351648
OX359196.1	7200000	0.341667	0.301698
OX359196.1	7300000	0.335	0.325674
OX359196.1	7400000	-0.253333	0.306693
OX359196.1	7500000	-0.333333	0.400599
OX359196.1	7600000	-0.245	0.483516
OX359196.1	7700000	1.93167	0.122877
OX359196.1	7800000	0.431667	0.347652
OX359196.1	7900000	2.27333	0.0849151
OX359196.1	8000000	1.62667	0.100899
OX359196.1	8100000	0.215	0.114885
OX359197.1	0	0.665	0.160839
OX359197.1	100000	1.67833	0.130869
OX359197.1	200000	2.98333	0.002997
OX359197.1	300000	1.29167	0.0649351
OX359197.1	400000	2.79	0.0539461
OX359197.1	500000	1.705	0.194805
OX359197.1	600000	0.52	0.346653
OX359197.1	700000	1.11	0.132867
OX359197.1	800000	1.24833	0.120879
OX359197.1	900000	-1.27	0.198801
OX359197.1	1000000	1.15167	0.137862
OX359197.1	1100000	-0.261667	0.443556
OX359197.1	1200000	0.0283333	0.475524
OX359197.1	1300000	0.913333	0.104895
OX359197.1	1400000	1.085	0.160839
OX359197.1	1500000	1.09667	0.038961
OX359197.1	1600000	1.70833	0.178821
OX359197.1	1700000	2.55	0.114885
OX359197.1	1800000	1.68	0.203796
OX359197.1	1900000	1.61833	0.034965
OX359197.1	2000000	0.79	0.102897
OX359197.1	2100000	1.85167	0.114885
OX359197.1	2200000	2.83167	0.01998
OX359197.1	2300000	0.393333	0.296703
OX359197.1	2400000	0.168333	0.468531
OX359197.1	2500000	1.77833	0.0599401
OX359197.1	2600000	-0.11	0.45954
OX359197.1	2700000	0.348333	0.390609
OX359197.1	2800000	0.261667	0.490509
OX359197.1	2900000	-1.48667	0.272727
OX359197.1	3000000	-0.415	0.402597
OX359197.1	3100000	-1.655	0.13986
OX359197.1	3200000	1.105	0.0779221
OX359197.1	3300000	1.11667	0.033966
OX359197.1	3400000	2.13	0.040959
OX359197.1	3500000	1.34667	0.116883
OX359197.1	3600000	0.168333	0.387612
OX359197.1	3700000	0.27	0.330669
OX359197.1	3800000	0.261667	0.34965
OX359197.1	3900000	0.35	0.257742
OX359197.1	4000000	1.34667	0.012987
OX359197.1	4100000	0.416667	0.28971
OX359197.1	4200000	0.386667	0.331668
OX359197.1	4300000	2.19667	0.011988
OX359197.1	4400000	-0.615	0.0859141
OX359197.1	4500000	-0.246667	0.424575
OX359197.1	4600000	0.0583333	0.490509
OX359197.1	4700000	-2.21333	0.012987
OX359197.1	4800000	-0.911667	0.364635
OX359197.1	4900000	1.395	0.0649351
OX359197.1	5000000	2.10667	0.032967
OX359197.1	5100000	1.705	0.00899101
OX359197.1	5200000	0.37	0.295704
OX359197.1	5300000	2.18833	0.034965
OX359197.1	5400000	1.68667	0.013986
OX359197.1	5500000	0.711667	0.277722
OX359197.1	5600000	1.30167	0.0859141
OX359197.1	5700000	1.01333	0.236763
OX359197.1	5800000	2.48333	0.037962
OX359197.1	5900000	-0.0316667	0.46953
OX359197.1	6000000	0.553333	0.04995
OX359197.1	6100000	1.635	0.000999001
OX359197.1	6200000	2.05667	0.003996
OX359197.1	6300000	1.335	0.0799201
OX359197.1	6400000	0.908333	0.215784
OX359197.1	6500000	0.366667	0.350649
OX359197.1	6600000	3.21333	0.014985
OX359197.1	6700000	1.90333	0.101898
OX359197.1	6800000	0.698333	0.230769
OX359197.1	6900000	0.805	0.153846
OX359197.1	7000000	2.03333	0.107892
OX359197.1	7100000	1.225	0.160839
OX359197.1	7200000	0.606667	0.0689311
OX359197.1	7300000	1.83	0.01998
OX359197.1	7400000	1.88167	0.004995
OX359197.1	7500000	0.616667	0.166833
OX359197.1	7600000	0.951667	0.100899
OX359197.1	7700000	0.0333333	0.331668
OX359198.1	0	0.276667	0.363636
OX359198.1	100000	-0.185	0.448551
OX359198.1	200000	2.91833	0.010989
OX359198.1	300000	3.06	0.036963
OX359198.1	400000	2.64833	0.106893
OX359198.1	500000	0.0816667	0.427572
OX359198.1	600000	1.845	0.024975
OX359198.1	700000	0.853333	0.151848
OX359198.1	800000	1.225	0.0819181
OX359198.1	900000	3.325	0.012987
OX359198.1	1000000	1.01833	0.108891
OX359198.1	1100000	1.35333	0.123876
OX359198.1	1200000	1.555	0.126873
OX359198.1	1300000	0.8	0.105894
OX359198.1	1400000	0.931667	0.0969031
OX359198.1	1500000	-0.161667	0.257742
OX359198.1	1600000	1.545	0.142857
OX359198.1	1700000	-0.166667	0.413586
OX359198.1	1800000	0.876667	0.182817
OX359198.1	1900000	2.03333	0.035964
OX359198.1	2000000	1.89	0.04995
OX359198.1	2100000	1.51833	0.00799201
OX359198.1	2200000	2.41667	0.013986
OX359198.1	2300000	2.29167	0.131868
OX359198.1	2400000	-0.0133333	0.482517
OX359198.1	2500000	2.29833	0.0529471
OX359198.1	2600000	1.38833	0.037962
OX359198.1	2700000	0.11	0.41958
OX359198.1	2800000	0.496667	0.328671
OX359198.1	2900000	1.68167	0.138861
OX359198.1	3000000	0.951667	0.266733
OX359198.1	3100000	0.413333	0.180819
OX359198.1	3200000	0.373333	0.127872
OX359198.1	3300000	0.258333	0.334665
OX359198.1	3400000	0.743333	0.183816
OX359198.1	3500000	0.905	0.176823
OX359198.1	3600000	0.681667	0.156843
OX359198.1	3700000	0.921667	0.206793
OX359198.1	3800000	0.726667	0.25974
OX359198.1	3900000	0.603333	0.298701
OX359198.1	4000000	0.0633333	0.415584
OX359198.1	4100000	0.136667	0.424575
OX359198.1	4200000	-0.79	0.364635
OX359198.1	4300000	-0.116667	0.467532
OX359198.1	4400000	1.145	0.186813
OX359198.1	4500000	2.78167	0.022977
OX359198.1	4600000	2.24333	0.0929071
OX359198.1	4700000	2.035	0.027972
OX359198.1	4800000	1.035	0.0629371
OX359198.1	4900000	2.43	0.122877
OX359198.1	5000000	2.025	0.0529471
OX359198.1	5100000	1.67833	0.01998
OX359198.1	5200000	1.60667	0.110889
OX359198.1	5300000	0.316667	0.287712
OX359198.1	5400000	0.681667	0.0869131
OX359198.1	5500000	1.81333	0.00699301
OX359198.1	5600000	2.46333	0.000999001
OX359198.1	5700000	0.43	0.365634
OX359198.1	5800000	-0.876667	0.33966
OX359198.1	5900000	1.05667	0.002997
OX359198.1	6000000	-0.23	0.361638
OX359198.1	6100000	0.625	0.0879121
OX359198.1	6200000	-0.336667	0.243756
OX359198.1	6300000	-0.22	0.365634
OX359198.1	6400000	0.763333	0.228771
OX359198.1	6500000	0.45	0.21978
OX359198.1	6600000	0.431667	0.295704
OX359198.1	6700000	0.095	0.41958
OX359198.1	6800000	-0.621667	0.312687
OX359198.1	6900000	0.718333	0.151848
OX359198.1	7000000	0.0966667	0.403596
OX359198.1	7100000	-0.423333	0.308691
OX359198.1	7200000	0.43	0.180819
OX359198.1	7300000	0.485	0.338661
OX359198.1	7400000	1.23667	0.0869131
OX359198.1	7500000	0.206667	0.327672
OX359198.1	7600000	0.283333	0.0879121
OX359199.1	0	0.495	0.18981
OX359199.1	100000	1.58833	0.038961
OX359199.1	200000	2.095	0.010989
OX359199.1	300000	1.96667	0.018981
OX359199.1	400000	0.37	0.304695
OX359199.1	500000	2.84167	0.000999001
OX359199.1	600000	1.83833	0.010989
OX359199.1	700000	1.36	0.028971
OX359199.1	800000	2.46333	0.038961
OX359199.1	900000	1.005	0.182817
OX359199.1	1000000	0.88	0.187812
OX359199.1	1100000	1.60667	0.003996
OX359199.1	1200000	1.27833	0.0759241
OX359199.1	1300000	0.661667	0.038961
OX359199.1	1400000	0.743333	0.223776
OX359199.1	1500000	0.653333	0.105894
OX359199.1	1600000	0.896667	0.106893
OX359199.1	1700000	0.0433333	0.452547
OX359199.1	1800000	-0.0166667	0.516484
OX359199.1	1900000	-0.391667	0.264735
OX359199.1	2000000	2.265	0.034965
OX359199.1	2100000	-0.05	0.504496
OX359199.1	2200000	1.365	0.102897
OX359199.1	2300000	-1.15333	0.0569431
OX359199.1	2400000	1.58833	0.0999001
OX359199.1	2500000	-0.908333	0.030969
OX359199.1	2600000	-5.09333	0.000999001
OX359199.1	2700000	-6.42833	0.000999001
OX359199.1	2800000	-2.87667	0.00599401
OX359199.1	2900000	-1.97667	0.01998
OX359199.1	3000000	0.06	0.471528
OX359199.1	3100000	0.166667	0.355644
OX359199.1	3200000	0.47	0.28971
OX359199.1	3300000	-0.143333	0.436563
OX359199.1	3400000	1.1	0.287712
OX359199.1	3500000	-4.315	0.000999001
OX359199.1	3600000	-0.386667	0.220779
OX359199.1	3700000	-3.61333	0.002997
OX359199.1	3800000	-2.28667	0.00999001
OX359199.1	3900000	0.0866667	0.382617
OX359199.1	4000000	0.928333	0.001998
OX359199.1	4100000	0.446667	0.36963
OX359199.1	4200000	0.518333	0.256743
OX359199.1	4300000	-0.53	0.153846
OX359199.1	4400000	0.908333	0.217782
OX359199.1	4500000	0.978333	0.00799201
OX359199.1	4600000	1.04167	0.0989011
OX359199.1	4700000	1.28	0.015984
OX359199.1	4800000	1.695	0.002997
OX359199.1	4900000	-0.338333	0.392607
OX359199.1	5000000	0.745	0.0939061
OX359199.1	5100000	1.50833	0.0659341
OX359199.1	5200000	1.57833	0.042957
OX359199.1	5300000	1.295	0.024975
OX359199.1	5400000	1.37333	0.0779221
OX359199.1	5500000	0.0316667	0.450549
OX359199.1	5600000	0.251667	0.300699
OX359199.1	5700000	2.53167	0.004995
OX359199.1	5800000	1.64667	0.13986
OX359199.1	5900000	0.983333	0.0709291
OX359199.1	6000000	3.28333	0.0569431
OX359199.1	6100000	0.565	0.293706
OX359199.1	6200000	2.24667	0.000999001
OX359199.1	6300000	1.25833	0.15984
OX359199.1	6400000	0.996667	0.0739261
OX359199.1	6500000	1.22167	0.152847
OX359199.1	6600000	1.04167	0.043956
OX359199.1	6700000	0.33	0.302697
OX359199.1	6800000	1.54	0.010989
OX359199.1	6900000	-0.17	0.436563
OX359199.1	7000000	-0.573333	0.308691
OX359199.1	7100000	-0.728333	0.460539
OX359199.1	7200000	0.443333	0.232767
OX359199.1	7300000	2.35833	0.000999001
OX359199.1	7400000	1.10833	0.112887
OX359199.1	7500000	0.24	0.330669
OX359199.1	7600000	-0.543333	0.047952
OX359200.1	0	0.251667	0.257742
OX359200.1	100000	-0.27	0.333666
OX359200.1	200000	1.16667	0.020979
OX359200.1	300000	0.015	0.451548
OX359200.1	400000	0.696667	0.18981
OX359200.1	500000	1.32167	0.043956
OX359200.1	600000	1.01833	0.00599401
OX359200.1	700000	3.06333	0.00799201
OX359200.1	800000	0.455	0.231768
OX359200.1	900000	2.485	0.042957
OX359200.1	1000000	2.445	0.002997
OX359200.1	1100000	0.21	0.382617
OX359200.1	1200000	1.315	0.138861
OX359200.1	1300000	0.906667	0.0949051
OX359200.1	1400000	-0.58	0.388611
OX359200.1	1500000	0.29	0.38961
OX359200.1	1600000	0.836667	0.126873
OX359200.1	1700000	-0.0466667	0.496503
OX359200.1	1800000	1.05167	0.0759241
OX359200.1	1900000	3.28	0.0609391
OX359200.1	2000000	2.715	0.043956
OX359200.1	2100000	2.78167	0.000999001
OX359200.1	2200000	1.055	0.00899101
OX359200.1	2300000	-1.695	0.0839161
OX359200.1	2400000	-0.311667	0.045954
OX359200.1	2500000	-0.486667	0.322677
OX359200.1	2600000	0.00833333	0.491508
OX359200.1	2700000	0.676667	0.10989
OX359200.1	2800000	0.636667	0.268731
OX359200.1	2900000	0.133333	0.417582
OX359200.1	3000000	-0.253333	0.408591
OX359200.1	3100000	0.391667	0.0509491
OX359200.1	3200000	0.556667	0.00799201
OX359200.1	3300000	0.585	0.01998
OX359200.1	3400000	0.27	0.0739261
OX359200.1	3500000	-0.03	0.474525
OX359200.1	3600000	0.47	0.161838
OX359200.1	3700000	0.653333	0.023976
OX359200.1	3800000	-0.105	0.387612
OX359200.1	3900000	1.13833	0.307692
OX359200.1	4000000	0.436667	0.391608
OX359200.1	4100000	-0.165	0.494505
OX359200.1	4200000	-0.0683333	0.525475
OX359200.1	4300000	0.971667	0.22977
OX359200.1	4400000	1.275	0.0919081
OX359200.1	4500000	2.02667	0.014985
OX359200.1	4600000	1.735	0.0739261
OX359200.1	4700000	2.29333	0.024975
OX359200.1	4800000	0.761667	0.166833
OX359200.1	4900000	1.36	0.010989
OX359200.1	5000000	1.235	0.036963
OX359200.1	5100000	0.373333	0.296703
OX359200.1	5200000	0.786667	0.163836
OX359200.1	5300000	1.47333	0.00599401
OX359200.1	5400000	0.148333	0.442557
OX359200.1	5500000	0.456667	0.403596
OX359200.1	5600000	2.78833	0.028971
OX359200.1	5700000	0.261667	0.316683
OX359200.1	5800000	1.305	0.133866
OX359200.1	5900000	1.78833	0.127872
OX359200.1	6000000	0.705	0.172827
OX359200.1	6100000	0.56	0.318681
OX359200.1	6200000	1.42167	0.046953
OX359200.1	6300000	2.05833	0.0889111
OX359200.1	6400000	0.54	0.1998
OX359200.1	6500000	1.44667	0.148851
OX359200.1	6600000	0.191667	0.441558
OX359200.1	6700000	0.773333	0.298701
OX359200.1	6800000	1.79333	0.026973
OX359200.1	6900000	1.46667	0.000999001
OX359200.1	7000000	3.57167	0.000999001
OX359200.1	7100000	1.35833	0.0769231
OX359200.1	7200000	1.67833	0.024975
OX359200.1	7300000	1.39667	0.017982
OX359200.1	7400000	1.39167	0.016983
OX359200.1	7500000	0.141667	0.0609391
OX359201.1	0	2.58833	0.012987
OX359201.1	100000	2.08333	0.00699301
OX359201.1	200000	1.11333	0.117882
OX359201.1	300000	1.56	0.0779221
OX359201.1	400000	2.21167	0.0529471
OX359201.1	500000	1.44	0.225774
OX359201.1	600000	0.703333	0.250749
OX359201.1	700000	2.86333	0.025974
OX359201.1	800000	-0.035	0.54046
OX359201.1	900000	2.22833	0.01998
OX359201.1	1000000	1.32833	0.0769231
OX359201.1	1100000	0.151667	0.378621
OX359201.1	1200000	1.4	0.014985
OX359201.1	1300000	1.99	0.010989
OX359201.1	1400000	2.12333	0.002997
OX359201.1	1500000	0.895	0.201798
OX359201.1	1600000	0.08	0.467532
OX359201.1	1700000	4.44833	0.001998
OX359201.1	1800000	0.98	0.170829
OX359201.1	1900000	2.84667	0.014985
OX359201.1	2000000	1.11	0.0989011
OX359201.1	2100000	2.37	0.001998
OX359201.1	2200000	1.67167	0.0609391
OX359201.1	2300000	1.81	0.030969
OX359201.1	2400000	-0.523333	0.246753
OX359201.1	2500000	-0.44	0.313686
OX359201.1	2600000	-1.26333	0.0769231
OX359201.1	2700000	-0.1	0.46953
OX359201.1	2800000	-0.531667	0.196803
OX359201.1	2900000	-1.10333	0.0549451
OX359201.1	3000000	-0.175	0.333666
OX359201.1	3100000	-0.0383333	0.46953
OX359201.1	3200000	-0.458333	0.0789211
OX359201.1	3300000	-0.128333	0.41958
OX359201.1	3400000	-0.665	0.0749251
OX359201.1	3500000	-0.821667	0.161838
OX359201.1	3600000	-0.105	0.495504
OX359201.1	3700000	-0.101667	0.42957
OX359201.1	3800000	-0.506667	0.47952
OX359201.1	3900000	-0.261667	0.462537
OX359201.1	4000000	0.18	0.346653
OX359201.1	4100000	0.868333	0.00699301
OX359201.1	4200000	0.953333	0.01998
OX359201.1	4300000	1.41167	0.134865
OX359201.1	4400000	1.16667	0.130869
OX359201.1	4500000	0.201667	0.374625
OX359201.1	4600000	3.25667	0.000999001
OX359201.1	4700000	1.57333	0.0629371
OX359201.1	4800000	0.61	0.283716
OX359201.1	4900000	0.655	0.0929071
OX359201.1	5000000	2.57167	0.0919081
OX359201.1	5100000	2.79833	0.02997
OX359201.1	5200000	3.445	0.041958
OX359201.1	5300000	1.88333	0.036963
OX359201.1	5400000	2.60833	0.0679321
OX359201.1	5500000	2.92	0.035964
OX359201.1	5600000	2.23	0.00699301
OX359201.1	5700000	0.388333	0.350649
OX359201.1	5800000	0.218333	0.358641
OX359201.1	5900000	0.668333	0.0959041
OX359201.1	6000000	1.42833	0.00699301
OX359201.1	6100000	0.97	0.0789211
OX359201.1	6200000	1.40167	0.0959041
OX359201.1	6300000	0.516667	0.210789
OX359201.1	6400000	2.00833	0.0949051
OX359201.1	6500000	1.47	0.0619381
OX359201.1	6600000	-0.221667	0.425574
OX359201.1	6700000	0.576667	0.24975
OX359201.1	6800000	0.68	0.142857
OX359201.1	6900000	0.005	0.343656
OX359202.1	0	0.755	0.176823
OX359202.1	100000	2.34667	0.000999001
OX359202.1	200000	2.50167	0.024975
OX359202.1	300000	1.36333	0.028971
OX359202.1	400000	1.34667	0.02997
OX359202.1	500000	3.31167	0.0769231
OX359202.1	600000	0.925	0.207792
OX359202.1	700000	1.685	0.022977
OX359202.1	800000	2.21	0.022977
OX359202.1	900000	0.653333	0.328671
OX359202.1	1000000	1.52667	0.113886
OX359202.1	1100000	1.36833	0.0719281
OX359202.1	1200000	0.105	0.426573
OX359202.1	1300000	2.37333	0.00599401
OX359202.1	1400000	1.55	0.00999001
OX359202.1	1500000	0.441667	0.182817
OX359202.1	1600000	2.61167	0.000999001
OX359202.1	1700000	1.68667	0.02997
OX359202.1	1800000	-0.13	0.505495
OX359202.1	1900000	1.63667	0.010989
OX359202.1	2000000	0.411667	0.0749251
OX359202.1	2100000	0.163333	0.414585
OX359202.1	2200000	0.338333	0.407592
OX359202.1	2300000	0.313333	0.294705
OX359202.1	2400000	-1.53	0.216783
OX359202.1	2500000	0.246667	0.365634
OX359202.1	2600000	1.15	0.272727
OX359202.1	2700000	0.591667	0.0879121
OX359202.1	2800000	0.958333	0.162837
OX359202.1	2900000	1.025	0.003996
OX359202.1	3000000	2.61667	0.020979
OX359202.1	3100000	0.991667	0.038961
OX359202.1	3200000	0.786667	0.108891
OX359202.1	3300000	0.571667	0.044955
OX359202.1	3400000	0.418333	0.126873
OX359202.1	3500000	0.87	0.036963
OX359202.1	3600000	2.24	0.00899101
OX359202.1	3700000	2.56167	0.012987
OX359202.1	3800000	1.62333	0.0829171
OX359202.1	3900000	1.40833	0.165834
OX359202.1	4000000	1.85	0.104895
OX359202.1	4100000	2.13333	0.038961
OX359202.1	4200000	2.91667	0.033966
OX359202.1	4300000	1.97667	0.0779221
OX359202.1	4400000	-1.62333	0.234765
OX359202.1	4500000	0.555	0.368631
OX359202.1	4600000	-0.02	0.477522
OX359202.1	4700000	1.06667	0.0519481
OX359202.1	4800000	0.731667	0.0739261
OX359202.1	4900000	1.43833	0.001998
OX359202.1	5000000	2.00667	0.016983
OX359202.1	5100000	2.15167	0.04995
OX359202.1	5200000	0.766667	0.265734
OX359202.1	5300000	1.145	0.100899
OX359202.1	5400000	1.35333	0.148851
OX359202.1	5500000	1.67	0.025974
OX359202.1	5600000	0.963333	0.0519481
OX359202.1	5700000	0.778333	0.0659341
OX359202.1	5800000	-0.366667	0.241758
OX359202.1	5900000	-0.836667	0.332667
OX359202.1	6000000	-0.385	0.436563
OX359202.1	6100000	1.46167	0.0999001
OX359202.1	6200000	1.50833	0.104895
OX359202.1	6300000	2.04667	0.00799201
OX359202.1	6400000	0.556667	0.174825
OX359202.1	6500000	0.24	0.326673
OX359202.1	6600000	-1.53333	0.275724
OX359202.1	6700000	-0.966667	0.142857
OX359203.1	0	0.015	0.208791

## Sheet: SNPdensity_SexFindR_Hapan
scaf	base	mean_MvF_dif	Pvalue
OY776060.1	0	0.16	0.241758
OY776060.1	100000	0.00666667	0.438561
OY776060.1	200000	0.08	0.347652
OY776060.1	300000	-0.266667	0.103896
OY776060.1	400000	0.36	0.248751
OY776060.1	500000	0.386667	0.198801
OY776060.1	600000	-0.146667	0.142857
OY776060.1	700000	-0.256667	0.240759
OY776060.1	800000	0.0466667	0.455544
OY776060.1	900000	0.316667	0.246753
OY776060.1	1000000	-1.77	0.000999001
OY776060.1	1100000	2.91333	0.04995
OY776060.1	1200000	-0.0333333	0.395604
OY776060.1	1300000	0.53	0.157842
OY776060.1	1400000	-0.263333	0.441558
OY776060.1	1500000	-0.06	0.334665
OY776060.1	1600000	0.4	0.200799
OY776060.1	1700000	0.476667	0.0549451
OY776060.1	1800000	0.706667	0.047952
OY776060.1	1900000	-0.173333	0.245754
OY776060.1	2000000	0.156667	0.28971
OY776060.1	2100000	-0.776667	0.240759
OY776060.1	2200000	0.413333	0.103896
OY776060.1	2300000	-0.03	0.395604
OY776060.1	2400000	-0.0233333	0.443556
OY776060.1	2500000	-0.07	0.440559
OY776060.1	2600000	0.00333333	0.445554
OY776060.1	2700000	-1.46	0.150849
OY776060.1	2800000	-0.62	0.231768
OY776060.1	2900000	1.43667	0.000999001
OY776060.1	3000000	0.34	0.355644
OY776060.1	3100000	-0.536667	0.0979021
OY776060.1	3200000	1.47	0.388611
OY776060.1	3300000	0.656667	0.301698
OY776060.1	3400000	-2.54667	0.000999001
OY776060.1	3500000	-2.63	0.047952
OY776060.1	3600000	-1.63333	0.047952
OY776060.1	3700000	-1.06	0.252747
OY776060.1	3800000	-2.98333	0.0969031
OY776060.1	3900000	-2.25333	0.188811
OY776060.1	4000000	-8.28	0.103896
OY776060.1	4100000	-0.343333	0.291708
OY776060.1	4200000	-0.673333	0.138861
OY776060.1	4300000	-1.37333	0.347652
OY776060.1	4400000	-1.13	0.197802
OY776060.1	4500000	0.0333333	0.445554
OY776060.1	4600000	0.22	0.291708
OY776060.1	4700000	0.126667	0.291708
OY776060.1	4800000	0.903333	0.157842
OY776060.1	4900000	0.626667	0.397602
OY776060.1	5000000	2.55333	0.148851
OY776060.1	5100000	-2.83	0.103896
OY776060.1	5200000	1.41	0.242757
OY776060.1	5300000	0.853333	0.288711
OY776060.1	5400000	-1.65667	0.150849
OY776060.1	5500000	-1.57	0.245754
OY776060.1	5600000	-2.69333	0.000999001
OY776060.1	5700000	3.56333	0.243756
OY776060.1	5800000	1.53667	0.0969031
OY776060.1	5900000	1.45667	0.0979021
OY776060.1	6000000	-4.48667	0.0949051
OY776060.1	6100000	-4.62667	0.0949051
OY776060.1	6200000	-4.52	0.000999001
OY776060.1	6300000	-1.04	0.301698
OY776060.1	6400000	-0.49	0.301698
OY776060.1	6500000	0.81	0.201798
OY776060.1	6600000	-0.34	0.356643
OY776060.1	6700000	-0.273333	0.390609
OY776060.1	6800000	-0.00666667	0.444555
OY776060.1	6900000	-2.82667	0.047952
OY776060.1	7000000	0.593333	0.295704
OY776060.1	7100000	1.64667	0.0969031
OY776060.1	7200000	0.89	0.355644
OY776060.1	7300000	-1.25667	0.244755
OY776060.1	7400000	1.21	0.145854
OY776060.1	7500000	0.34	0.306693
OY776060.1	7600000	1.53	0.206793
OY776060.1	7700000	-0.95	0.197802
OY776060.1	7800000	2.56	0.047952
OY776060.1	7900000	-0.38	0.342657
OY776060.1	8000000	-0.183333	0.351648
OY776060.1	8100000	0.35	0.15984
OY776060.1	8200000	0.02	0.432567
OY776060.1	8300000	-0.0433333	0.403596
OY776060.1	8400000	1.12	0.048951
OY776060.1	8500000	1.55667	0.0959041
OY776060.1	8600000	-0.406667	0.446553
OY776060.1	8700000	3.26333	0.0959041
OY776060.1	8800000	0.166667	0.2997
OY776060.1	8900000	0.743333	0.291708
OY776060.1	9000000	0.516667	0.383616
OY776060.1	9100000	0.04	0.428571
OY776060.1	9200000	0.5	0.385614
OY776060.1	9300000	-1.68	0.04995
OY776060.1	9400000	-0.686667	0.357642
OY776060.1	9500000	-3.29667	0.047952
OY776060.1	9600000	0.353333	0.381618
OY776060.1	9700000	0.353333	0.244755
OY776060.1	9800000	-1.52	0.146853
OY776060.1	9900000	0.53	0.194805
OY776060.1	10000000	-4.06333	0.000999001
OY776060.1	10100000	-1.96	0.047952
OY776060.1	10200000	-2.19333	0.241758
OY776060.1	10300000	-0.19	0.38961
OY776060.1	10400000	-1.79667	0.0959041
OY776060.1	10500000	0.803333	0.342657
OY776060.1	10600000	3.10667	0.103896
OY776060.1	10700000	1.99667	0.194805
OY776060.1	10800000	-0.446667	0.395604
OY776060.1	10900000	0.53	0.287712
OY776060.1	11000000	1.19	0.0959041
OY776060.1	11100000	-2.34667	0.047952
OY776060.1	11200000	-0.393333	0.300699
OY776060.1	11300000	1.55667	0.103896
OY776060.1	11400000	3.18667	0.048951
OY776060.1	11500000	0.58	0.196803
OY776060.1	11600000	0.0666667	0.445554
OY776060.1	11700000	-0.143333	0.394605
OY776060.1	11800000	2.94	0.103896
OY776060.1	11900000	0.0633333	0.44955
OY776060.1	12000000	1.75667	0.000999001
OY776060.1	12100000	0.38	0.24975
OY776060.1	12200000	-1.69667	0.150849
OY776060.1	12300000	1.18	0.000999001
OY776060.1	12400000	0.663333	0.201798
OY776060.1	12500000	1.12	0.253746
OY776060.1	12600000	1.65333	0.000999001
OY776060.1	12700000	0.453333	0.24975
OY776060.1	12800000	1.46333	0.0949051
OY776060.1	12900000	2.57333	0.000999001
OY776060.1	13000000	1.36667	0.047952
OY776060.1	13100000	1.11333	0.04995
OY776060.1	13200000	0.04	0.433566
OY776060.1	13300000	1.45667	0.000999001
OY776060.1	13400000	1.82	0.233766
OY776060.1	13500000	2.73	0.000999001
OY776060.1	13600000	-0.303333	0.441558
OY776060.1	13700000	2.25333	0.0979021
OY776060.1	13800000	1.63333	0.048951
OY776060.1	13900000	-0.143333	0.440559
OY776060.1	14000000	1.67333	0.0909091
OY776060.1	14100000	2.8	0.000999001
OY776060.1	14200000	-1.93	0.047952
OY776060.1	14300000	-1.45	0.192807
OY776060.1	14400000	4.05667	0.047952
OY776060.1	14500000	5.86667	0.000999001
OY776060.1	14600000	1.33667	0.151848
OY776060.1	14700000	-2.18667	0.240759
OY776060.1	14800000	-0.3	0.351648
OY776060.1	14900000	-0.833333	0.343656
OY776060.1	15000000	1.85333	0.0549451
OY776060.1	15100000	0.686667	0.24975
OY776060.1	15200000	1.46	0.2997
OY776060.1	15300000	0.41	0.402597
OY776060.1	15400000	-1.15	0.23976
OY776060.1	15500000	0.803333	0.000999001
OY776060.1	15600000	0.176667	0.194805
OY776060.1	15700000	0.116667	0.34965
OY776060.1	15800000	0.236667	0.252747
OY776060.1	15900000	-0.173333	0.231768
OY776060.1	16000000	0.446667	0.201798
OY776060.1	16100000	0.32	0.444555
OY776060.1	16200000	0.426667	0.2997
OY776060.1	16300000	1.33667	0.394605
OY776060.1	16400000	0.34	0.336663
OY776060.1	16500000	1.59	0.197802
OY776060.1	16600000	-0.07	0.445554
OY776060.1	16700000	0.17	0.245754
OY776060.1	16800000	0.156667	0.24975
OY776060.1	16900000	-0.00333333	0.441558
OY776060.1	17000000	0.263333	0.157842
OY776060.1	17100000	0.623333	0.148851
OY776060.1	17200000	0.493333	0.151848
OY776060.1	17300000	0.363333	0.110889
OY776060.1	17400000	-0.47	0.344655
OY776060.1	17500000	-0.633333	0.358641
OY776060.1	17600000	-2.07333	0.047952
OY776060.1	17700000	2.4	0.000999001
OY776060.1	17800000	-2.31667	0.047952
OY776060.1	17900000	-0.54	0.395604
OY776060.1	18000000	0.423333	0.337662
OY776060.1	18100000	-0.2	0.0569431
OY776061.1	0	-0.236667	0.390609
OY776061.1	100000	1.18333	0.382617
OY776061.1	200000	1.17667	0.243756
OY776061.1	300000	1.05667	0.338661
OY776061.1	400000	0.37	0.398601
OY776061.1	500000	1.20333	0.000999001
OY776061.1	600000	-0.39	0.345654
OY776061.1	700000	0.52	0.346653
OY776061.1	800000	-1.74333	0.150849
OY776061.1	900000	-1.08333	0.0949051
OY776061.1	1000000	-0.35	0.393606
OY776061.1	1100000	-0.18	0.252747
OY776061.1	1200000	-0.08	0.406593
OY776061.1	1300000	-0.9	0.047952
OY776061.1	1400000	2.06	0.102897
OY776061.1	1500000	-1.95333	0.000999001
OY776061.1	1600000	0.103333	0.450549
OY776061.1	1700000	-0.213333	0.451548
OY776061.1	1800000	-0.2	0.391608
OY776061.1	1900000	-0.55	0.141858
OY776061.1	2000000	1.52667	0.000999001
OY776061.1	2100000	-1.93667	0.201798
OY776061.1	2200000	2.12	0.110889
OY776061.1	2300000	-0.353333	0.357642
OY776061.1	2400000	0.593333	0.301698
OY776061.1	2500000	-1.3	0.248751
OY776061.1	2600000	-1.78667	0.237762
OY776061.1	2700000	-0.376667	0.394605
OY776061.1	2800000	0.543333	0.197802
OY776061.1	2900000	0.173333	0.347652
OY776061.1	3000000	0.583333	0.138861
OY776061.1	3100000	-0.04	0.198801
OY776061.1	3200000	0.133333	0.150849
OY776061.1	3300000	-0.946667	0.244755
OY776061.1	3400000	-0.0733333	0.396603
OY776061.1	3500000	0.00333333	0.194805
OY776061.1	3600000	-0.00666667	0.384615
OY776061.1	3700000	0.0166667	0.137862
OY776061.1	3800000	0.0133333	0.101898
OY776061.1	3900000	0.0133333	0.000999001
OY776061.1	4000000	0.246667	0.000999001
OY776061.1	4100000	0.0433333	0.437562
OY776061.1	4200000	0.00666667	0.197802
OY776061.1	4300000	-0.00666667	0.295704
OY776061.1	4400000	0.0433333	0.0979021
OY776061.1	4500000	0.413333	0.296703
OY776061.1	4600000	0.553333	0.04995
OY776061.1	4700000	0.416667	0.396603
OY776061.1	4800000	0.11	0.343656
OY776061.1	4900000	0.356667	0.0549451
OY776061.1	5000000	-0.0833333	0.384615
OY776061.1	5100000	-0.176667	0.337662
OY776061.1	5200000	0.933333	0.201798
OY776061.1	5300000	0.483333	0.04995
OY776061.1	5400000	-1.40667	0.201798
OY776061.1	5500000	2.07333	0.145854
OY776061.1	5600000	-0.74	0.248751
OY776061.1	5700000	-0.776667	0.248751
OY776061.1	5800000	-1.92333	0.143856
OY776061.1	5900000	-1.05	0.0909091
OY776061.1	6000000	-0.786667	0.243756
OY776061.1	6100000	4.43	0.150849
OY776061.1	6200000	2.31667	0.000999001
OY776061.1	6300000	-1.74667	0.000999001
OY776061.1	6400000	-0.303333	0.244755
OY776061.1	6500000	-0.296667	0.394605
OY776061.1	6600000	-3.49667	0.048951
OY776061.1	6700000	-1.22333	0.047952
OY776061.1	6800000	1.28333	0.142857
OY776061.1	6900000	-0.826667	0.184815
OY776061.1	7000000	-0.133333	0.442557
OY776061.1	7100000	0.16	0.341658
OY776061.1	7200000	1.29333	0.048951
OY776061.1	7300000	-1.19333	0.197802
OY776061.1	7400000	-0.0933333	0.436563
OY776061.1	7500000	-1.30333	0.000999001
OY776061.1	7600000	0.75	0.256743
OY776061.1	7700000	2.34333	0.102897
OY776061.1	7800000	-1.94	0.047952
OY776061.1	7900000	-1.71667	0.13986
OY776061.1	8000000	0.44	0.384615
OY776061.1	8100000	0.423333	0.347652
OY776061.1	8200000	1.00333	0.436563
OY776061.1	8300000	0.95	0.350649
OY776061.1	8400000	-0.34	0.347652
OY776061.1	8500000	-0.7	0.047952
OY776061.1	8600000	-0.13	0.243756
OY776062.1	0	-0.236667	0.311688
OY776062.1	100000	0.313333	0.248751
OY776062.1	200000	-1.01667	0.196803
OY776062.1	300000	-0.776667	0.197802
OY776062.1	400000	-0.903333	0.302697
OY776062.1	500000	-1.20333	0.103896
OY776062.1	600000	0.746667	0.294705
OY776062.1	700000	0.393333	0.298701
OY776062.1	800000	-1.85667	0.000999001
OY776062.1	900000	-0.14	0.290709
OY776062.1	1000000	0.216667	0.354645
OY776062.1	1100000	-1.2	0.000999001
OY776062.1	1200000	-0.506667	0.208791
OY776062.1	1300000	0.7	0.288711
OY776062.1	1400000	2.93667	0.13986
OY776062.1	1500000	0.756667	0.150849
OY776062.1	1600000	-1.15	0.103896
OY776062.1	1700000	-1.81667	0.192807
OY776062.1	1800000	-1.64	0.155844
OY776062.1	1900000	-0.823333	0.000999001
OY776062.1	2000000	2.58667	0.103896
OY776062.1	2100000	-2.01333	0.0569431
OY776062.1	2200000	-0.17	0.450549
OY776062.1	2300000	-2.47667	0.000999001
OY776062.1	2400000	1.00333	0.192807
OY776062.1	2500000	2.32333	0.0969031
OY776062.1	2600000	1.79333	0.043956
OY776062.1	2700000	2.99	0.103896
OY776062.1	2800000	2.08667	0.0549451
OY776062.1	2900000	0.453333	0.347652
OY776062.1	3000000	-0.0633333	0.440559
OY776062.1	3100000	1.34	0.235764
OY776062.1	3200000	1.32333	0.213786
OY776062.1	3300000	-0.86	0.402597
OY776062.1	3400000	-1.33667	0.151848
OY776062.1	3500000	2.02667	0.202797
OY776062.1	3600000	1.40333	0.0929071
OY776062.1	3700000	2.69667	0.04995
OY776062.1	3800000	1.52667	0.04995
OY776062.1	3900000	0.933333	0.307692
OY776062.1	4000000	-0.51	0.13986
OY776062.1	4100000	-0.97	0.154845
OY776062.1	4200000	1.36	0.000999001
OY776062.1	4300000	2.85667	0.000999001
OY776062.1	4400000	-0.356667	0.442557
OY776062.1	4500000	0.78	0.152847
OY776062.1	4600000	-0.726667	0.23976
OY776062.1	4700000	1.93667	0.300699
OY776062.1	4800000	-0.41	0.200799
OY776062.1	4900000	-0.76	0.047952
OY776062.1	5000000	-2.28333	0.000999001
OY776062.1	5100000	-4.84667	0.047952
OY776062.1	5200000	0.59	0.307692
OY776062.1	5300000	3.28333	0.047952
OY776062.1	5400000	0.596667	0.103896
OY776062.1	5500000	-0.0266667	0.392607
OY776062.1	5600000	-0.243333	0.391608
OY776062.1	5700000	0.436667	0.338661
OY776062.1	5800000	-0.29	0.43956
OY776062.1	5900000	-0.24	0.297702
OY776062.1	6000000	-0.6	0.296703
OY776062.1	6100000	0.0766667	0.443556
OY776062.1	6200000	-2.26333	0.193806
OY776062.1	6300000	-1.92333	0.141858
OY776062.1	6400000	-2.29667	0.244755
OY776062.1	6500000	0.686667	0.2997
OY776062.1	6600000	3.63333	0.000999001
OY776062.1	6700000	1.26	0.103896
OY776062.1	6800000	0.236667	0.352647
OY776062.1	6900000	4.20333	0.0549451
OY776062.1	7000000	2.48	0.000999001
OY776062.1	7100000	-2.56333	0.000999001
OY776062.1	7200000	-3.81667	0.000999001
OY776062.1	7300000	0.863333	0.157842
OY776062.1	7400000	0.89	0.102897
OY776062.1	7500000	0.833333	0.000999001
OY776062.1	7600000	1.08667	0.0949051
OY776062.1	7700000	-0.26	0.336663
OY776062.1	7800000	0.806667	0.201798
OY776062.1	7900000	1.11	0.157842
OY776062.1	8000000	0.436667	0.294705
OY776062.1	8100000	3.28	0.04995
OY776062.1	8200000	2.75	0.142857
OY776062.1	8300000	1.19333	0.048951
OY776062.1	8400000	0.54	0.154845
OY776063.1	0	0.246667	0.350649
OY776063.1	100000	1.18333	0.238761
OY776063.1	200000	-2.40333	0.000999001
OY776063.1	300000	0.94	0.24975
OY776063.1	400000	5.36	0.0549451
OY776063.1	500000	-1.73	0.137862
OY776063.1	600000	-0.603333	0.295704
OY776063.1	700000	1.06333	0.000999001
OY776063.1	800000	-4.05667	0.000999001
OY776063.1	900000	-4.64667	0.000999001
OY776063.1	1000000	-0.496667	0.347652
OY776063.1	1100000	2.93	0.250749
OY776063.1	1200000	-5.59	0.000999001
OY776063.1	1300000	-4.03667	0.047952
OY776063.1	1400000	-3.23333	0.153846
OY776063.1	1500000	0.37	0.346653
OY776063.1	1600000	2.34333	0.283716
OY776063.1	1700000	-1.61667	0.047952
OY776063.1	1800000	1.41667	0.204795
OY776063.1	1900000	4.21333	0.000999001
OY776063.1	2000000	3.26333	0.110889
OY776063.1	2100000	3.83667	0.000999001
OY776063.1	2200000	1.62333	0.24975
OY776063.1	2300000	0.816667	0.248751
OY776063.1	2400000	2.91	0.102897
OY776063.1	2500000	0.473333	0.451548
OY776063.1	2600000	-2.99667	0.0549451
OY776063.1	2700000	-2.84667	0.18981
OY776063.1	2800000	2.96333	0.0979021
OY776063.1	2900000	0.73	0.24975
OY776063.1	3000000	2.03333	0.233766
OY776063.1	3100000	3.11333	0.201798
OY776063.1	3200000	1.87333	0.04995
OY776063.1	3300000	-0.26	0.336663
OY776063.1	3400000	0.146667	0.441558
OY776063.1	3500000	1.43667	0.047952
OY776063.1	3600000	-4.52333	0.000999001
OY776063.1	3700000	-0.0733333	0.393606
OY776063.1	3800000	-1.28667	0.300699
OY776063.1	3900000	-2.41333	0.0909091
OY776063.1	4000000	-1.2	0.000999001
OY776063.1	4100000	-0.576667	0.24975
OY776063.1	4200000	0.07	0.333666
OY776063.1	4300000	0.0466667	0.437562
OY776063.1	4400000	2.07667	0.252747
OY776063.1	4500000	-1.61	0.043956
OY776063.1	4600000	-0.51	0.398601
OY776063.1	4700000	-0.79	0.146853
OY776063.1	4800000	-1.46667	0.000999001
OY776063.1	4900000	-0.196667	0.292707
OY776063.1	5000000	-0.846667	0.441558
OY776063.1	5100000	-0.48	0.301698
OY776063.1	5200000	0.24	0.445554
OY776063.1	5300000	1.32333	0.0969031
OY776063.1	5400000	3.48	0.000999001
OY776063.1	5500000	1.84	0.101898
OY776063.1	5600000	0.113333	0.311688
OY776063.1	5700000	-0.74	0.295704
OY776063.1	5800000	-0.03	0.448551
OY776063.1	5900000	-1.77333	0.000999001
OY776063.1	6000000	-2.23667	0.047952
OY776063.1	6100000	-0.296667	0.358641
OY776063.1	6200000	1.92	0.157842
OY776063.1	6300000	-2.04667	0.000999001
OY776063.1	6400000	0.24	0.297702
OY776063.1	6500000	2.26	0.184815
OY776063.1	6600000	1.06667	0.148851
OY776063.1	6700000	1.37	0.290709
OY776063.1	6800000	0.85	0.350649
OY776063.1	6900000	0.146667	0.386613
OY776063.1	7000000	-0.28	0.381618
OY776063.1	7100000	1.17333	0.252747
OY776063.1	7200000	-1.28667	0.28971
OY776063.1	7300000	-0.26	0.350649
OY776063.1	7400000	0.706667	0.150849
OY776063.1	7500000	-2.14333	0.197802
OY776063.1	7600000	-1	0.240759
OY776063.1	7700000	-1.63667	0.0959041
OY776063.1	7800000	-0.0366667	0.286713
OY776064.1	0	-1.37	0.103896
OY776064.1	100000	-3.09667	0.000999001
OY776064.1	200000	-0.123333	0.385614
OY776064.1	300000	-1.88667	0.188811
OY776064.1	400000	-1.80333	0.150849
OY776064.1	500000	0.636667	0.446553
OY776064.1	600000	-2.13	0.306693
OY776064.1	700000	-0.393333	0.294705
OY776064.1	800000	-0.243333	0.392607
OY776064.1	900000	-0.466667	0.304695
OY776064.1	1000000	0.296667	0.188811
OY776064.1	1100000	-0.583333	0.047952
OY776064.1	1200000	-0.84	0.298701
OY776064.1	1300000	-3.12	0.150849
OY776064.1	1400000	-1.43333	0.048951
OY776064.1	1500000	-1.09	0.242757
OY776064.1	1600000	4.46	0.000999001
OY776064.1	1700000	-2.61667	0.000999001
OY776064.1	1800000	1.36	0.101898
OY776064.1	1900000	1.24667	0.157842
OY776064.1	2000000	-0.473333	0.294705
OY776064.1	2100000	-0.41	0.346653
OY776064.1	2200000	-0.326667	0.255744
OY776064.1	2300000	0.616667	0.150849
OY776064.1	2400000	0.143333	0.298701
OY776064.1	2500000	0.433333	0.398601
OY776064.1	2600000	0.176667	0.335664
OY776064.1	2700000	0.7	0.344655
OY776064.1	2800000	1.07667	0.0969031
OY776064.1	2900000	0.41	0.192807
OY776064.1	3000000	1.43333	0.15984
OY776064.1	3100000	-0.536667	0.355644
OY776064.1	3200000	-0.566667	0.344655
OY776064.1	3300000	-0.0133333	0.448551
OY776064.1	3400000	-2.71667	0.000999001
OY776064.1	3500000	0.473333	0.341658
OY776064.1	3600000	1.58667	0.196803
OY776064.1	3700000	0.233333	0.350649
OY776064.1	3800000	1.38	0.0549451
OY776064.1	3900000	-0.253333	0.33966
OY776064.1	4000000	0.936667	0.103896
OY776064.1	4100000	0.47	0.290709
OY776064.1	4200000	1.27333	0.142857
OY776064.1	4300000	0.55	0.447552
OY776064.1	4400000	1.39	0.0549451
OY776064.1	4500000	2.54	0.000999001
OY776064.1	4600000	-0.226667	0.436563
OY776064.1	4700000	0.44	0.142857
OY776064.1	4800000	0.62	0.193806
OY776064.1	4900000	-0.0566667	0.428571
OY776064.1	5000000	3.29667	0.0929071
OY776064.1	5100000	0.746667	0.240759
OY776064.1	5200000	1.55333	0.204795
OY776064.1	5300000	-0.71	0.281718
OY776064.1	5400000	1.01333	0.341658
OY776064.1	5500000	0.38	0.241758
OY776064.1	5600000	-1.54667	0.000999001
OY776064.1	5700000	0.27	0.338661
OY776064.1	5800000	1.44	0.334665
OY776064.1	5900000	-8.04333	0.000999001
OY776064.1	6000000	-1.54667	0.30969
OY776064.1	6100000	-0.546667	0.338661
OY776064.1	6200000	-1.62667	0.047952
OY776064.1	6300000	-1.4	0.200799
OY776064.1	6400000	-1.10667	0.198801
OY776064.1	6500000	-1.02667	0.136863
OY776064.1	6600000	-0.503333	0.380619
OY776064.1	6700000	-0.893333	0.141858
OY776064.1	6800000	-0.693333	0.33966
OY776064.1	6900000	0.816667	0.244755
OY776064.1	7000000	-0.703333	0.000999001
OY776064.1	7100000	-1.45	0.047952
OY776064.1	7200000	-3.92	0.0949051
OY776064.1	7300000	-1.15333	0.28971
OY776064.1	7400000	-3.68667	0.0949051
OY776064.1	7500000	1.36667	0.248751
OY776065.1	0	1.50667	0.150849
OY776065.1	100000	-1.02	0.000999001
OY776065.1	200000	1.27	0.15984
OY776065.1	300000	-1.14667	0.296703
OY776065.1	400000	0.273333	0.197802
OY776065.1	500000	-0.966667	0.048951
OY776065.1	600000	-1.51	0.000999001
OY776065.1	700000	0.143333	0.251748
OY776065.1	800000	-0.356667	0.344655
OY776065.1	900000	0.543333	0.28971
OY776065.1	1000000	0.85	0.304695
OY776065.1	1100000	0.39	0.145854
OY776065.1	1200000	0.776667	0.302697
OY776065.1	1300000	1.85667	0.138861
OY776065.1	1400000	-1.72667	0.103896
OY776065.1	1500000	-2.67	0.103896
OY776065.1	1600000	-0.233333	0.24975
OY776065.1	1700000	0.0666667	0.441558
OY776065.1	1800000	0.356667	0.248751
OY776065.1	1900000	0.35	0.194805
OY776065.1	2000000	0.613333	0.296703
OY776065.1	2100000	0.22	0.337662
OY776065.1	2200000	2.31667	0.151848
OY776065.1	2300000	1.8	0.184815
OY776065.1	2400000	3.34333	0.048951
OY776065.1	2500000	1.74333	0.150849
OY776065.1	2600000	1.89667	0.34965
OY776065.1	2700000	-0.873333	0.394605
OY776065.1	2800000	-0.916667	0.286713
OY776065.1	2900000	-0.67	0.23976
OY776065.1	3000000	1.96333	0.000999001
OY776065.1	3100000	0.533333	0.194805
OY776065.1	3200000	-0.983333	0.188811
OY776065.1	3300000	2.03667	0.102897
OY776065.1	3400000	0.78	0.000999001
OY776065.1	3500000	0.666667	0.246753
OY776065.1	3600000	0.556667	0.294705
OY776065.1	3700000	-0.223333	0.398601
OY776065.1	3800000	1.8	0.2997
OY776065.1	3900000	2.46333	0.0959041
OY776065.1	4000000	-2.78333	0.150849
OY776065.1	4100000	-0.283333	0.394605
OY776065.1	4200000	1.86	0.103896
OY776065.1	4300000	0.236667	0.281718
OY776065.1	4400000	-0.85	0.184815
OY776065.1	4500000	1.29667	0.257742
OY776065.1	4600000	-1.06	0.244755
OY776065.1	4700000	2.39333	0.195804
OY776065.1	4800000	4.39333	0.142857
OY776065.1	4900000	0.73	0.351648
OY776065.1	5000000	1.83667	0.103896
OY776065.1	5100000	0.463333	0.300699
OY776065.1	5200000	1.82	0.043956
OY776065.1	5300000	-1.48333	0.0959041
OY776065.1	5400000	-2.71667	0.142857
OY776065.1	5500000	0.84	0.253746
OY776065.1	5600000	1.46	0.297702
OY776065.1	5700000	0.113333	0.384615
OY776065.1	5800000	-0.306667	0.445554
OY776065.1	5900000	-0.523333	0.345654
OY776065.1	6000000	1.33	0.290709
OY776065.1	6100000	-0.85	0.264735
OY776065.1	6200000	0.91	0.0979021
OY776065.1	6300000	1.76667	0.278721
OY776065.1	6400000	-1.45667	0.047952
OY776065.1	6500000	1.29	0.000999001
OY776065.1	6600000	4.86333	0.0969031
OY776065.1	6700000	4.07	0.04995
OY776065.1	6800000	1.91667	0.000999001
OY776065.1	6900000	6.06667	0.04995
OY776065.1	7000000	3.86333	0.0969031
OY776065.1	7100000	1.1	0.0929071
OY776065.1	7200000	-1.44333	0.291708
OY776065.1	7300000	-0.00333333	0.451548
OY776065.1	7400000	-1.95333	0.000999001
OY776065.1	7500000	-2.88	0.103896
OY776066.1	0	0	1
OY776066.1	100000	1.92333	0.0549451
OY776066.1	200000	-0.316667	0.241758
OY776066.1	300000	0.0166667	0.447552
OY776066.1	400000	-1.71	0.152847
OY776066.1	500000	-2.31	0.000999001
OY776066.1	600000	-0.306667	0.342657
OY776066.1	700000	-1.45333	0.301698
OY776066.1	800000	-1.27333	0.201798
OY776066.1	900000	-0.706667	0.143856
OY776066.1	1000000	-0.483333	0.198801
OY776066.1	1100000	-5.41	0.0929071
OY776066.1	1200000	2.05333	0.154845
OY776066.1	1300000	3.33667	0.291708
OY776066.1	1400000	3.60333	0.048951
OY776066.1	1500000	0.78	0.290709
OY776066.1	1600000	-0.423333	0.362637
OY776066.1	1700000	0.92	0.047952
OY776066.1	1800000	-0.15	0.150849
OY776066.1	1900000	0.906667	0.0549451
OY776066.1	2000000	0.0633333	0.352647
OY776066.1	2100000	0.256667	0.151848
OY776066.1	2200000	0.46	0.048951
OY776066.1	2300000	0.24	0.294705
OY776066.1	2400000	-0.16	0.241758
OY776066.1	2500000	0.33	0.194805
OY776066.1	2600000	-0.19	0.291708
OY776066.1	2700000	0.223333	0.196803
OY776066.1	2800000	0.143333	0.280719
OY776066.1	2900000	0.6	0.0959041
OY776066.1	3000000	-0.816667	0.150849
OY776066.1	3100000	-0.753333	0.202797
OY776066.1	3200000	0.866667	0.13986
OY776066.1	3300000	-1.43667	0.0929071
OY776066.1	3400000	0.16	0.296703
OY776066.1	3500000	0.693333	0.201798
OY776066.1	3600000	0.9	0.264735
OY776066.1	3700000	1.61333	0.047952
OY776066.1	3800000	3.96667	0.151848
OY776066.1	3900000	1.07667	0.2997
OY776066.1	4000000	0.39	0.300699
OY776066.1	4100000	0.436667	0.213786
OY776066.1	4200000	-0.866667	0.233766
OY776066.1	4300000	0.536667	0.343656
OY776066.1	4400000	-3.21667	0.000999001
OY776066.1	4500000	-0.523333	0.240759
OY776066.1	4600000	1.78333	0.000999001
OY776066.1	4700000	-1.68667	0.043956
OY776066.1	4800000	-0.603333	0.250749
OY776066.1	4900000	0.336667	0.344655
OY776066.1	5000000	-0.26	0.208791
OY776066.1	5100000	-0.56	0.000999001
OY776066.1	5200000	0.263333	0.348651
OY776066.1	5300000	-0.263333	0.38961
OY776066.1	5400000	1.98667	0.000999001
OY776066.1	5500000	0.0133333	0.443556
OY776066.1	5600000	-1.4	0.0959041
OY776066.1	5700000	-0.243333	0.357642
OY776066.1	5800000	0.233333	0.343656
OY776066.1	5900000	-0.223333	0.23976
OY776066.1	6000000	0.516667	0.151848
OY776066.1	6100000	0.51	0.304695
OY776066.1	6200000	0.256667	0.402597
OY776066.1	6300000	0.373333	0.0909091
OY776066.1	6400000	-0.173333	0.384615
OY776066.1	6500000	0.786667	0.201798
OY776066.1	6600000	-0.00666667	0.451548
OY776066.1	6700000	-0.503333	0.186813
OY776066.1	6800000	0.79	0.101898
OY776066.1	6900000	-0.11	0.441558
OY776066.1	7000000	-0.826667	0.287712
OY776066.1	7100000	-0.556667	0.394605
OY776066.1	7200000	-1.05	0.244755
OY776066.1	7300000	-1.16333	0.141858
OY776067.1	0	-0.45	0.047952
OY776067.1	100000	1.34	0.340659
OY776067.1	200000	-1.16667	0.047952
OY776067.1	300000	-0.02	0.448551
OY776067.1	400000	0.536667	0.234765
OY776067.1	500000	-0.37	0.393606
OY776067.1	600000	1.57	0.341658
OY776067.1	700000	-0.193333	0.396603
OY776067.1	800000	-2.01333	0.0949051
OY776067.1	900000	-0.446667	0.347652
OY776067.1	1000000	0.44	0.290709
OY776067.1	1100000	-0.763333	0.196803
OY776067.1	1200000	-2.65	0.047952
OY776067.1	1300000	0.88	0.202797
OY776067.1	1400000	1.25333	0.287712
OY776067.1	1500000	0.68	0.351648
OY776067.1	1600000	-0.00666667	0.438561
OY776067.1	1700000	0.0733333	0.407592
OY776067.1	1800000	-0.0533333	0.451548
OY776067.1	1900000	-2.43667	0.0549451
OY776067.1	2000000	0.11	0.298701
OY776067.1	2100000	-0.316667	0.208791
OY776067.1	2200000	-0.463333	0.24975
OY776067.1	2300000	-0.483333	0.250749
OY776067.1	2400000	0.0466667	0.38961
OY776067.1	2500000	0.0833333	0.402597
OY776067.1	2600000	1.64	0.000999001
OY776067.1	2700000	2.40667	0.197802
OY776067.1	2800000	0.786667	0.358641
OY776067.1	2900000	1.86667	0.248751
OY776067.1	3000000	0.806667	0.295704
OY776067.1	3100000	-0.06	0.446553
OY776067.1	3200000	0.0733333	0.440559
OY776067.1	3300000	4.41	0.000999001
OY776067.1	3400000	0.22	0.333666
OY776067.1	3500000	-0.136667	0.335664
OY776067.1	3600000	0.0866667	0.388611
OY776067.1	3700000	-0.06	0.452547
OY776067.1	3800000	-0.38	0.342657
OY776067.1	3900000	-0.686667	0.197802
OY776067.1	4000000	0.91	0.351648
OY776067.1	4100000	-0.0333333	0.446553
OY776067.1	4200000	1.29667	0.043956
OY776067.1	4300000	2.67333	0.048951
OY776067.1	4400000	3.89333	0.000999001
OY776067.1	4500000	-1.58667	0.287712
OY776067.1	4600000	-0.0333333	0.441558
OY776067.1	4700000	0.443333	0.346653
OY776067.1	4800000	0.293333	0.358641
OY776067.1	4900000	-0.0433333	0.432567
OY776067.1	5000000	2.07333	0.146853
OY776067.1	5100000	1.95667	0.0909091
OY776067.1	5200000	0.503333	0.288711
OY776067.1	5300000	3.30667	0.0909091
OY776067.1	5400000	0.42	0.208791
OY776067.1	5500000	0.15	0.341658
OY776067.1	5600000	0.806667	0.204795
OY776067.1	5700000	-1.65667	0.195804
OY776067.1	5800000	-0.806667	0.151848
OY776067.1	5900000	2.14667	0.192807
OY776067.1	6000000	-0.653333	0.295704
OY776067.1	6100000	1.53333	0.243756
OY776067.1	6200000	0.326667	0.38961
OY776067.1	6300000	-0.423333	0.240759
OY776067.1	6400000	-1.15333	0.193806
OY776067.1	6500000	0.536667	0.394605
OY776067.1	6600000	3.56	0.04995
OY776067.1	6700000	3.49667	0.047952
OY776067.1	6800000	-2.47333	0.000999001
OY776067.1	6900000	-3.50333	0.151848
OY776067.1	7000000	0.67	0.248751
OY776068.1	0	1.73667	0.197802
OY776068.1	100000	3.79667	0.0569431
OY776068.1	200000	0.203333	0.446553
OY776068.1	300000	-0.26	0.300699
OY776068.1	400000	-0.0533333	0.451548
OY776068.1	500000	0.513333	0.260739
OY776068.1	600000	-0.75	0.391608
OY776068.1	700000	1.21333	0.000999001
OY776068.1	800000	0.526667	0.246753
OY776068.1	900000	2.13667	0.145854
OY776068.1	1000000	1.01333	0.301698
OY776068.1	1100000	-0.906667	0.101898
OY776068.1	1200000	-0.76	0.3996
OY776068.1	1300000	-0.133333	0.448551
OY776068.1	1400000	-0.603333	0.400599
OY776068.1	1500000	-2.05	0.047952
OY776068.1	1600000	1.27333	0.102897
OY776068.1	1700000	0.00333333	0.438561
OY776068.1	1800000	0.913333	0.13986
OY776068.1	1900000	-0.143333	0.443556
OY776068.1	2000000	-1.64	0.148851
OY776068.1	2100000	1.65333	0.043956
OY776068.1	2200000	0.656667	0.244755
OY776068.1	2300000	3.87	0.102897
OY776068.1	2400000	1.00667	0.244755
OY776068.1	2500000	-0.88	0.195804
OY776068.1	2600000	-0.196667	0.338661
OY776068.1	2700000	-0.02	0.441558
OY776068.1	2800000	0.566667	0.355644
OY776068.1	2900000	-0.453333	0.441558
OY776068.1	3000000	-2.64667	0.154845
OY776068.1	3100000	-0.46	0.392607
OY776068.1	3200000	-0.416667	0.441558
OY776068.1	3300000	-0.0666667	0.441558
OY776068.1	3400000	1.24667	0.13986
OY776068.1	3500000	1.3	0.150849
OY776068.1	3600000	2.25667	0.154845
OY776068.1	3700000	2.50667	0.0569431
OY776068.1	3800000	-1.3	0.342657
OY776068.1	3900000	-0.356667	0.302697
OY776068.1	4000000	-0.606667	0.436563
OY776068.1	4100000	0.623333	0.236763
OY776068.1	4200000	-0.336667	0.344655
OY776068.1	4300000	2.08667	0.103896
OY776068.1	4400000	-1.79	0.000999001
OY776068.1	4500000	-0.726667	0.281718
OY776068.1	4600000	-2.29	0.000999001
OY776068.1	4700000	2.13667	0.154845
OY776068.1	4800000	0.356667	0.295704
OY776068.1	4900000	-1.10333	0.103896
OY776068.1	5000000	-1.38667	0.04995
OY776068.1	5100000	2.07667	0.20979
OY776068.1	5200000	-1.38333	0.000999001
OY776068.1	5300000	-3.71667	0.000999001
OY776068.1	5400000	-0.13	0.406593
OY776068.1	5500000	0.466667	0.342657
OY776068.1	5600000	-0.933333	0.197802
OY776068.1	5700000	0.0133333	0.438561
OY776068.1	5800000	0.0766667	0.390609
OY776068.1	5900000	0.266667	0.294705
OY776068.1	6000000	0.22	0.390609
OY776068.1	6100000	-0.78	0.18981
OY776068.1	6200000	0.63	0.248751
OY776068.1	6300000	1.56	0.101898
OY776068.1	6400000	2.37333	0.0949051
OY776068.1	6500000	0.42	0.297702
OY776068.1	6600000	2.19667	0.000999001
OY776068.1	6700000	1.71333	0.103896
OY776068.1	6800000	-1.17	0.195804
OY776068.1	6900000	0.76	0.303696
OY776068.1	7000000	-0.166667	0.302697
OY776069.1	0	-0.263333	0.292707
OY776069.1	100000	-0.496667	0.000999001
OY776069.1	200000	-1.39	0.151848
OY776069.1	300000	-1.32	0.048951
OY776069.1	400000	0.813333	0.151848
OY776069.1	500000	0.06	0.445554
OY776069.1	600000	0.0466667	0.400599
OY776069.1	700000	-0.613333	0.141858
OY776069.1	800000	-0.406667	0.291708
OY776069.1	900000	2.77667	0.043956
OY776069.1	1000000	-1.31	0.146853
OY776069.1	1100000	0.886667	0.192807
OY776069.1	1200000	1.05667	0.14985
OY776069.1	1300000	-1.55	0.142857
OY776069.1	1400000	0.863333	0.0549451
OY776069.1	1500000	1.63333	0.201798
OY776069.1	1600000	2.33333	0.0909091
OY776069.1	1700000	-2.95333	0.000999001
OY776069.1	1800000	0.196667	0.404595
OY776069.1	1900000	-0.52	0.188811
OY776069.1	2000000	0.923333	0.294705
OY776069.1	2100000	-0.503333	0.334665
OY776069.1	2200000	0.15	0.342657
OY776069.1	2300000	0.476667	0.151848
OY776069.1	2400000	-0.113333	0.334665
OY776069.1	2500000	-0.51	0.201798
OY776069.1	2600000	-0.613333	0.300699
OY776069.1	2700000	0.516667	0.296703
OY776069.1	2800000	-0.3	0.394605
OY776069.1	2900000	0.48	0.38961
OY776069.1	3000000	0.883333	0.197802
OY776069.1	3100000	1.11333	0.256743
OY776069.1	3200000	-2.45667	0.157842
OY776069.1	3300000	-2.14667	0.000999001
OY776069.1	3400000	-5.62333	0.000999001
OY776069.1	3500000	-4.45667	0.000999001
OY776069.1	3600000	-5.07333	0.000999001
OY776069.1	3700000	-2.23667	0.0979021
OY776069.1	3800000	-0.633333	0.300699
OY776069.1	3900000	-0.146667	0.393606
OY776069.1	4000000	1.21667	0.193806
OY776069.1	4100000	-0.0366667	0.386613
OY776069.1	4200000	-0.543333	0.296703
OY776069.1	4300000	1.45	0.343656
OY776069.1	4400000	-0.68	0.235764
OY776069.1	4500000	-1.55333	0.190809
OY776069.1	4600000	1.55333	0.24975
OY776069.1	4700000	0.893333	0.103896
OY776069.1	4800000	1.90333	0.000999001
OY776069.1	4900000	-1.41667	0.000999001
OY776069.1	5000000	-0.0533333	0.445554
OY776069.1	5100000	-0.22	0.287712
OY776069.1	5200000	-0.653333	0.347652
OY776069.1	5300000	0.973333	0.297702
OY776069.1	5400000	-4.14333	0.000999001
OY776069.1	5500000	-3.79	0.048951
OY776069.1	5600000	-2.60333	0.0949051
OY776069.1	5700000	0.0333333	0.358641
OY776069.1	5800000	0.45	0.24975
OY776069.1	5900000	-0.716667	0.24975
OY776069.1	6000000	-0.0333333	0.38961
OY776069.1	6100000	2.84333	0.000999001
OY776069.1	6200000	-0.34	0.137862
OY776069.1	6300000	0.1	0.342657
OY776069.1	6400000	-0.95	0.101898
OY776069.1	6500000	-1.17667	0.232767
OY776069.1	6600000	1.11	0.101898
OY776069.1	6700000	0.2	0.384615
OY776069.1	6800000	2.02	0.0959041
OY776069.1	6900000	0.45	0.233766
OY776070.1	0	-0.203333	0.441558
OY776070.1	100000	-1.80667	0.047952
OY776070.1	200000	-1.46	0.047952
OY776070.1	300000	1.01667	0.0949051
OY776070.1	400000	0.366667	0.141858
OY776070.1	500000	1.51333	0.000999001
OY776070.1	600000	-0.34	0.13986
OY776070.1	700000	1.28667	0.103896
OY776070.1	800000	-1.09	0.24975
OY776070.1	900000	-0.423333	0.193806
OY776070.1	1000000	0.0233333	0.403596
OY776070.1	1100000	0.393333	0.000999001
OY776070.1	1200000	0.94	0.0949051
OY776070.1	1300000	1.4	0.240759
OY776070.1	1400000	-2.15333	0.141858
OY776070.1	1500000	0.216667	0.342657
OY776070.1	1600000	-1.48667	0.000999001
OY776070.1	1700000	0.133333	0.443556
OY776070.1	1800000	2.62	0.248751
OY776070.1	1900000	0.7	0.402597
OY776070.1	2000000	0.25	0.243756
OY776070.1	2100000	2.06	0.0949051
OY776070.1	2200000	-0.513333	0.24975
OY776070.1	2300000	-6.05333	0.000999001
OY776070.1	2400000	-1.59333	0.000999001
OY776070.1	2500000	1.40333	0.155844
OY776070.1	2600000	-0.156667	0.398601
OY776070.1	2700000	-0.0533333	0.450549
OY776070.1	2800000	5.53	0.000999001
OY776070.1	2900000	-3.15	0.0949051
OY776070.1	3000000	1.5	0.103896
OY776070.1	3100000	-0.356667	0.388611
OY776070.1	3200000	0.0633333	0.443556
OY776070.1	3300000	0.323333	0.354645
OY776070.1	3400000	-0.243333	0.340659
OY776070.1	3500000	0.666667	0.448551
OY776070.1	3600000	1.38667	0.146853
OY776070.1	3700000	-0.72	0.047952
OY776070.1	3800000	0.703333	0.248751
OY776070.1	3900000	-0.00666667	0.428571
OY776070.1	4000000	-1.55	0.137862
OY776070.1	4100000	-0.7	0.288711
OY776070.1	4200000	-0.0833333	0.453546
OY776070.1	4300000	0.103333	0.356643
OY776070.1	4400000	3.18333	0.103896
OY776070.1	4500000	2.78	0.000999001
OY776070.1	4600000	-2.41667	0.243756
OY776070.1	4700000	0.763333	0.151848
OY776070.1	4800000	-1.20333	0.197802
OY776070.1	4900000	-1.71333	0.137862
OY776070.1	5000000	-1.64333	0.000999001
OY776070.1	5100000	1.54333	0.244755
OY776070.1	5200000	-0.393333	0.43956
OY776070.1	5300000	-0.733333	0.385614
OY776070.1	5400000	-5.72	0.000999001
OY776070.1	5500000	2.89333	0.04995
OY776070.1	5600000	3.75667	0.000999001
OY776070.1	5700000	1.82	0.0549451
OY776070.1	5800000	-1	0.345654
OY776070.1	5900000	0.0766667	0.394605
OY776070.1	6000000	4.10667	0.0979021
OY776070.1	6100000	0.683333	0.110889
OY776070.1	6200000	-0.116667	0.394605
OY776070.1	6300000	-0.0833333	0.333666
OY776070.1	6400000	1.63	0.047952
OY776070.1	6500000	-0.253333	0.291708
OY776070.1	6600000	-0.356667	0.242757
OY776070.1	6700000	-0.76	0.255744
OY776071.1	0	-0.626667	0.248751
OY776071.1	100000	-0.0266667	0.442557
OY776071.1	200000	-0.273333	0.436563
OY776071.1	300000	-2.64333	0.0569431
OY776071.1	400000	1.21	0.233766
OY776071.1	500000	2.22333	0.334665
OY776071.1	600000	-1.25333	0.153846
OY776071.1	700000	-0.63	0.336663
OY776071.1	800000	2.83333	0.04995
OY776071.1	900000	-2.24333	0.047952
OY776071.1	1000000	1.08667	0.110889
OY776071.1	1100000	0.27	0.446553
OY776071.1	1200000	1.11333	0.196803
OY776071.1	1300000	-0.08	0.392607
OY776071.1	1400000	-0.503333	0.235764
OY776071.1	1500000	1.82	0.192807
OY776071.1	1600000	-1.26667	0.18981
OY776071.1	1700000	3.28	0.0549451
OY776071.1	1800000	0.803333	0.302697
OY776071.1	1900000	2.04333	0.000999001
OY776071.1	2000000	1.01667	0.110889
OY776071.1	2100000	-2.18667	0.000999001
OY776071.1	2200000	-0.32	0.428571
OY776071.1	2300000	-2.22	0.188811
OY776071.1	2400000	-4.02667	0.0949051
OY776071.1	2500000	-2.46333	0.0949051
OY776071.1	2600000	-3.42667	0.0949051
OY776071.1	2700000	-0.596667	0.244755
OY776071.1	2800000	-1.59333	0.0949051
OY776071.1	2900000	0.23	0.353646
OY776071.1	3000000	0.583333	0.204795
OY776071.1	3100000	-0.183333	0.0969031
OY776071.1	3200000	-0.416667	0.197802
OY776071.1	3300000	0.5	0.241758
OY776071.1	3400000	-0.976667	0.043956
OY776071.1	3500000	-1.41	0.000999001
OY776071.1	3600000	-0.356667	0.150849
OY776071.1	3700000	0.14	0.443556
OY776071.1	3800000	0.233333	0.047952
OY776071.1	3900000	0.54	0.2997
OY776071.1	4000000	0.883333	0.335664
OY776071.1	4100000	0.233333	0.351648
OY776071.1	4200000	-0.49	0.286713
OY776071.1	4300000	1.03333	0.24975
OY776071.1	4400000	-0.853333	0.292707
OY776071.1	4500000	-1.95667	0.138861
OY776071.1	4600000	-0.383333	0.304695
OY776071.1	4700000	0.07	0.441558
OY776071.1	4800000	-0.126667	0.394605
OY776071.1	4900000	0.813333	0.298701
OY776071.1	5000000	0.506667	0.248751
OY776071.1	5100000	0.886667	0.150849
OY776071.1	5200000	-0.923333	0.290709
OY776071.1	5300000	0.46	0.195804
OY776071.1	5400000	0.6	0.336663
OY776071.1	5500000	0.22	0.441558
OY776071.1	5600000	0.21	0.344655
OY776071.1	5700000	-2.27667	0.043956
OY776071.1	5800000	-0.06	0.353646
OY776071.1	5900000	0.49	0.33966
OY776071.1	6000000	1.45667	0.204795
OY776071.1	6100000	3.05333	0.110889
OY776071.1	6200000	1	0.140859
OY776071.1	6300000	2.99667	0.0569431
OY776071.1	6400000	-0.566667	0.291708
OY776071.1	6500000	-0.536667	0.245754
OY776071.1	6600000	2.68667	0.151848
OY776071.1	6700000	2.66	0.048951
OY776072.1	0	0.263333	0.290709
OY776072.1	100000	1.93333	0.043956
OY776072.1	200000	-4.12333	0.000999001
OY776072.1	300000	-1.72333	0.043956
OY776072.1	400000	-0.926667	0.197802
OY776072.1	500000	0.706667	0.346653
OY776072.1	600000	1.01	0.150849
OY776072.1	700000	-0.856667	0.335664
OY776072.1	800000	-1.89333	0.047952
OY776072.1	900000	4.35	0.000999001
OY776072.1	1000000	-0.39	0.394605
OY776072.1	1100000	0.0466667	0.443556
OY776072.1	1200000	-2.10667	0.047952
OY776072.1	1300000	-2.67667	0.000999001
OY776072.1	1400000	0.783333	0.145854
OY776072.1	1500000	0.74	0.13986
OY776072.1	1600000	-1.03	0.201798
OY776072.1	1700000	-2.87333	0.0569431
OY776072.1	1800000	-0.846667	0.101898
OY776072.1	1900000	-0.39	0.24975
OY776072.1	2000000	0.103333	0.444555
OY776072.1	2100000	0.186667	0.446553
OY776072.1	2200000	-0.0866667	0.403596
OY776072.1	2300000	-1.00667	0.000999001
OY776072.1	2400000	-0.856667	0.0959041
OY776072.1	2500000	-1.28	0.04995
OY776072.1	2600000	-1.25333	0.048951
OY776072.1	2700000	-0.756667	0.247752
OY776072.1	2800000	-0.156667	0.244755
OY776072.1	2900000	-0.00333333	0.448551
OY776072.1	3000000	0.07	0.390609
OY776072.1	3100000	0.4	0.244755
OY776072.1	3200000	-0.466667	0.23976
OY776072.1	3300000	-0.233333	0.243756
OY776072.1	3400000	0.0433333	0.43956
OY776072.1	3500000	2.45667	0.047952
OY776072.1	3600000	-1.24333	0.047952
OY776072.1	3700000	-2.00333	0.0959041
OY776072.1	3800000	-1.08	0.150849
OY776072.1	3900000	-0.36	0.428571
OY776072.1	4000000	0.393333	0.394605
OY776072.1	4100000	-0.166667	0.344655
OY776072.1	4200000	-2.54667	0.043956
OY776072.1	4300000	1.47333	0.0909091
OY776072.1	4400000	-1.41667	0.196803
OY776072.1	4500000	2.57333	0.000999001
OY776072.1	4600000	-0.866667	0.255744
OY776072.1	4700000	0.71	0.403596
OY776072.1	4800000	-1.02667	0.342657
OY776072.1	4900000	-0.366667	0.338661
OY776072.1	5000000	-0.346667	0.292707
OY776072.1	5100000	3.25667	0.101898
OY776072.1	5200000	-1.58333	0.245754
OY776072.1	5300000	1.27	0.248751
OY776072.1	5400000	1.73	0.047952
OY776072.1	5500000	0.0666667	0.408591
OY776072.1	5600000	0.303333	0.245754
OY776072.1	5700000	-1.14	0.000999001
OY776072.1	5800000	0.223333	0.201798
OY776072.1	5900000	0.326667	0.241758
OY776072.1	6000000	-0.326667	0.291708
OY776072.1	6100000	-0.03	0.404595
OY776072.1	6200000	1.87333	0.04995
OY776072.1	6300000	0.0833333	0.441558
OY776072.1	6400000	2.61667	0.000999001
OY776072.1	6500000	0.253333	0.351648
OY776073.1	0	-1.92667	0.000999001
OY776073.1	100000	0.556667	0.395604
OY776073.1	200000	-0.466667	0.43956
OY776073.1	300000	-0.493333	0.441558
OY776073.1	400000	0.146667	0.403596
OY776073.1	500000	-0.123333	0.346653
OY776073.1	600000	0.396667	0.157842
OY776073.1	700000	-0.08	0.397602
OY776073.1	800000	0.206667	0.398601
OY776073.1	900000	0.583333	0.260739
OY776073.1	1000000	2.25667	0.047952
OY776073.1	1100000	1.29667	0.247752
OY776073.1	1200000	-0.843333	0.141858
OY776073.1	1300000	-2.91667	0.0949051
OY776073.1	1400000	-0.186667	0.290709
OY776073.1	1500000	2.39667	0.0549451
OY776073.1	1600000	0.813333	0.248751
OY776073.1	1700000	-0.16	0.441558
OY776073.1	1800000	0.183333	0.444555
OY776073.1	1900000	-0.94	0.240759
OY776073.1	2000000	-0.203333	0.431568
OY776073.1	2100000	-1.23667	0.287712
OY776073.1	2200000	-1.05333	0.290709
OY776073.1	2300000	-1.45667	0.047952
OY776073.1	2400000	-4.06667	0.000999001
OY776073.1	2500000	-0.396667	0.438561
OY776073.1	2600000	4.25	0.000999001
OY776073.1	2700000	4.13	0.000999001
OY776073.1	2800000	-0.476667	0.350649
OY776073.1	2900000	-0.396667	0.338661
OY776073.1	3000000	0.293333	0.351648
OY776073.1	3100000	0.62	0.343656
OY776073.1	3200000	-2.16667	0.347652
OY776073.1	3300000	-0.15	0.437562
OY776073.1	3400000	-1.03	0.255744
OY776073.1	3500000	-0.0633333	0.445554
OY776073.1	3600000	0.0566667	0.442557
OY776073.1	3700000	0.216667	0.3996
OY776073.1	3800000	0.0133333	0.441558
OY776073.1	3900000	1.84	0.000999001
OY776073.1	4000000	-0.223333	0.395604
OY776073.1	4100000	-0.323333	0.357642
OY776073.1	4200000	-0.206667	0.452547
OY776073.1	4300000	0.87	0.308691
OY776073.1	4400000	-1.36667	0.24975
OY776073.1	4500000	2.24333	0.0569431
OY776073.1	4600000	1.48667	0.250749
OY776073.1	4700000	0.38	0.336663
OY776073.1	4800000	0.896667	0.241758
OY776073.1	4900000	-0.533333	0.395604
OY776073.1	5000000	-1.5	0.137862
OY776073.1	5100000	-4.31	0.047952
OY776073.1	5200000	1.86667	0.300699
OY776073.1	5300000	0.796667	0.243756
OY776073.1	5400000	4.56333	0.000999001
OY776073.1	5500000	2.98	0.0979021
OY776073.1	5600000	0.94	0.342657
OY776073.1	5700000	-2.40333	0.000999001
OY776073.1	5800000	-2.23333	0.000999001
OY776073.1	5900000	-0.6	0.346653
OY776073.1	6000000	-0.863333	0.387612
OY776073.1	6100000	-1.52333	0.190809
OY776073.1	6200000	0.28	0.397602
OY776073.1	6300000	1.52333	0.34965
OY776073.1	6400000	0.69	0.0959041
OY776073.1	6500000	0.153333	0.000999001
OY776074.1	0	1.89667	0.445554
OY776074.1	100000	1.11333	0.307692
OY776074.1	200000	-0.193333	0.398601
OY776074.1	300000	1.61	0.103896
OY776074.1	400000	0.76	0.250749
OY776074.1	500000	1.45333	0.047952
OY776074.1	600000	0.52	0.338661
OY776074.1	700000	-0.463333	0.343656
OY776074.1	800000	-2.62	0.0949051
OY776074.1	900000	-0.83	0.101898
OY776074.1	1000000	0.69	0.252747
OY776074.1	1100000	0.1	0.441558
OY776074.1	1200000	-1.12667	0.20979
OY776074.1	1300000	2.11333	0.000999001
OY776074.1	1400000	-3.02333	0.000999001
OY776074.1	1500000	-0.196667	0.390609
OY776074.1	1600000	-1.62667	0.338661
OY776074.1	1700000	-1.63667	0.287712
OY776074.1	1800000	-0.936667	0.398601
OY776074.1	1900000	1.13333	0.248751
OY776074.1	2000000	1.12	0.151848
OY776074.1	2100000	2.47	0.0959041
OY776074.1	2200000	1.26333	0.355644
OY776074.1	2300000	-0.89	0.204795
OY776074.1	2400000	-0.38	0.103896
OY776074.1	2500000	0.403333	0.244755
OY776074.1	2600000	-0.823333	0.195804
OY776074.1	2700000	-0.906667	0.235764
OY776074.1	2800000	-0.0333333	0.38961
OY776074.1	2900000	2.34333	0.0979021
OY776074.1	3000000	-0.436667	0.201798
OY776074.1	3100000	-0.186667	0.398601
OY776074.1	3200000	0.443333	0.047952
OY776074.1	3300000	0.196667	0.198801
OY776074.1	3400000	-0.236667	0.244755
OY776074.1	3500000	1.05	0.151848
OY776074.1	3600000	-0.673333	0.292707
OY776074.1	3700000	0.0733333	0.446553
OY776074.1	3800000	-1.59333	0.047952
OY776074.1	3900000	-1.57333	0.334665
OY776074.1	4000000	1.29333	0.0949051
OY776074.1	4100000	2.93333	0.0909091
OY776074.1	4200000	1.39333	0.043956
OY776074.1	4300000	-0.64	0.293706
OY776074.1	4400000	-0.603333	0.235764
OY776074.1	4500000	-2.58333	0.441558
OY776074.1	4600000	-1.88667	0.137862
OY776074.1	4700000	4.14667	0.000999001
OY776074.1	4800000	-0.76	0.28971
OY776074.1	4900000	1.30333	0.257742
OY776074.1	5000000	2.05667	0.0909091
OY776074.1	5100000	1.29333	0.195804
OY776074.1	5200000	1.21333	0.251748
OY776074.1	5300000	-0.23	0.334665
OY776074.1	5400000	-1.40667	0.198801
OY776074.1	5500000	-1.06	0.201798
OY776074.1	5600000	-1.87	0.047952
OY776074.1	5700000	2.46	0.101898
OY776074.1	5800000	0.326667	0.13986
OY776074.1	5900000	-0.436667	0.103896
OY776075.1	0	-0.273333	0.110889
OY776075.1	100000	-0.73	0.300699
OY776075.1	200000	0.0933333	0.392607
OY776075.1	300000	-0.213333	0.436563
OY776075.1	400000	-0.72	0.405594
OY776075.1	500000	-1.84333	0.103896
OY776075.1	600000	0.963333	0.24975
OY776075.1	700000	1.25	0.197802
OY776075.1	800000	2.65667	0.047952
OY776075.1	900000	0.433333	0.437562
OY776075.1	1000000	-0.733333	0.243756
OY776075.1	1100000	1.53667	0.233766
OY776075.1	1200000	0.57	0.244755
OY776075.1	1300000	0.86	0.136863
OY776075.1	1400000	-1.43667	0.188811
OY776075.1	1500000	0.656667	0.343656
OY776075.1	1600000	1.34	0.137862
OY776075.1	1700000	-1.54	0.000999001
OY776075.1	1800000	0.196667	0.436563
OY776075.1	1900000	-0.86	0.047952
OY776075.1	2000000	-1.52333	0.047952
OY776075.1	2100000	0.993333	0.353646
OY776075.1	2200000	0.743333	0.203796
OY776075.1	2300000	-0.543333	0.248751
OY776075.1	2400000	0.29	0.294705
OY776075.1	2500000	-0.2	0.438561
OY776075.1	2600000	1.63667	0.194805
OY776075.1	2700000	-1.09	0.291708
OY776075.1	2800000	1.56	0.102897
OY776075.1	2900000	-0.173333	0.396603
OY776075.1	3000000	-1.82667	0.150849
OY776075.1	3100000	-0.293333	0.0909091
OY776075.1	3200000	-0.38	0.357642
OY776075.1	3300000	-0.03	0.346653
OY776075.1	3400000	0.763333	0.291708
OY776075.1	3500000	-0.0166667	0.44955
OY776075.1	3600000	-0.266667	0.352647
OY776075.1	3700000	0.04	0.450549
OY776075.1	3800000	1.64333	0.193806
OY776075.1	3900000	4.58333	0.000999001
OY776075.1	4000000	1.21333	0.137862
OY776075.1	4100000	-0.21	0.255744
OY776075.1	4200000	-1.92333	0.145854
OY776075.1	4300000	-0.786667	0.197802
OY776075.1	4400000	0.813333	0.0909091
OY776075.1	4500000	0.486667	0.342657
OY776075.1	4600000	0.03	0.388611
OY776075.1	4700000	-0.926667	0.248751
OY776075.1	4800000	2.50667	0.358641
OY776075.1	4900000	1.55667	0.197802
OY776075.1	5000000	0.253333	0.394605
OY776075.1	5100000	-0.946667	0.000999001
OY776075.1	5200000	-2.96333	0.0959041
OY776075.1	5300000	2.99	0.047952
OY776075.1	5400000	-0.513333	0.244755
OY776075.1	5500000	1.23	0.137862
OY776075.1	5600000	1.69	0.0959041
OY776075.1	5700000	4.02667	0.142857
OY776075.1	5800000	-0.09	0.151848
OY776076.1	0	0.393333	0.0949051
OY776076.1	100000	-0.716667	0.23976
OY776076.1	200000	1.5	0.101898
OY776076.1	300000	1.8	0.248751
OY776076.1	400000	-2.61333	0.146853
OY776076.1	500000	1.58667	0.342657
OY776076.1	600000	-0.633333	0.196803
OY776076.1	700000	1.10667	0.288711
OY776076.1	800000	-0.366667	0.347652
OY776076.1	900000	-2.48667	0.138861
OY776076.1	1000000	-2.72667	0.186813
OY776076.1	1100000	0.653333	0.101898
OY776076.1	1200000	-2.49667	0.0949051
OY776076.1	1300000	-0.11	0.23976
OY776076.1	1400000	-2.46	0.195804
OY776076.1	1500000	3.17333	0.000999001
OY776076.1	1600000	0.336667	0.334665
OY776076.1	1700000	0.423333	0.435564
OY776076.1	1800000	-0.09	0.3996
OY776076.1	1900000	0.0733333	0.438561
OY776076.1	2000000	-1.48333	0.0949051
OY776076.1	2100000	-0.343333	0.392607
OY776076.1	2200000	-0.933333	0.0969031
OY776076.1	2300000	1.10333	0.048951
OY776076.1	2400000	0.29	0.337662
OY776076.1	2500000	1.47333	0.298701
OY776076.1	2600000	1.55333	0.246753
OY776076.1	2700000	0.846667	0.192807
OY776076.1	2800000	-1.88333	0.204795
OY776076.1	2900000	1.36	0.288711
OY776076.1	3000000	2.48667	0.237762
OY776076.1	3100000	0.893333	0.347652
OY776076.1	3200000	-3.80667	0.231768
OY776076.1	3300000	-4.38667	0.000999001
OY776076.1	3400000	1.12333	0.343656
OY776076.1	3500000	0.176667	0.341658
OY776076.1	3600000	-0.433333	0.201798
OY776076.1	3700000	0.406667	0.303696
OY776076.1	3800000	0.946667	0.000999001
OY776076.1	3900000	1.62	0.000999001
OY776076.1	4000000	-0.0766667	0.390609
OY776076.1	4100000	0.636667	0.15984
OY776076.1	4200000	0.63	0.193806
OY776076.1	4300000	2.38667	0.047952
OY776076.1	4400000	1.39667	0.208791
OY776076.1	4500000	3.76	0.000999001
OY776076.1	4600000	2.54667	0.000999001
OY776076.1	4700000	-2.26	0.043956
OY776076.1	4800000	3.45333	0.000999001
OY776076.1	4900000	-1.08333	0.287712
OY776076.1	5000000	1.12333	0.000999001
OY776076.1	5100000	0.41	0.297702
OY776076.1	5200000	0.11	0.33966
OY776076.1	5300000	1.46333	0.196803
OY776076.1	5400000	-0.0833333	0.440559
OY776076.1	5500000	2.47667	0.101898
OY776076.1	5600000	1.35	0.048951
OY776076.1	5700000	-0.176667	0.311688
CAVLYH010000001.1	0	0.156667	0.355644
CAVLYH010000002.1	0	0.00333333	0.151848
CAVLYH010000003.1	0	0.0666667	0.201798
CAVLYH010000005.1	0	-7.82333	0.000999001
CAVLYH010000005.1	100000	-0.373333	0.000999001
CAVLYH010000006.1	0	1.83667	0.000999001
CAVLYH010000007.1	0	-0.363333	0.195804
CAVLYH010000008.1	0	0.0166667	0.000999001
CAVLYH010000009.1	0	-0.13	0.0959041
CAVLYH010000010.1	0	-0.05	0.32967
CAVLYH010000011.1	0	-0.663333	0.141858
CAVLYH010000012.1	0	0.0266667	0.243756
CAVLYH010000013.1	0	0.00666667	0.390609
CAVLYH010000014.1	0	-0.00666667	0.208791
CAVLYH010000015.1	0	0.26	0.047952
CAVLYH010000016.1	0	0.0666667	0.195804
CAVLYH010000017.1	0	0.01	0.248751
CAVLYH010000018.1	0	-0.02	0.000999001
CAVLYH010000019.1	0	0.05	0.151848
CAVLYH010000021.1	0	0	1
CAVLYH010000022.1	0	-0.213333	0.304695
OY776077.1	0	0.00333333	0.000999001
CAVLYH010000020.1	0	-0.0233333	0.000999001
OY776070.1	6800000	-0.00333333	0.000999001
CAVLYH010000004.1	0	-0.00333333	0.000999001

## Sheet: SNPdensity_SexFindR_Olob
scaf	base	mean_MvF_dif	Pvalue
OX382150.1	0	0.02	0.32967
OX382150.1	100000	0.76	0.000999001
OX382150.1	200000	-7.255	0.000999001
OX382150.1	300000	-1.165	0.32967
OX382150.1	400000	0.14	0.33966
OX382150.1	500000	-4.8	0.000999001
OX382150.1	600000	-0.375	0.000999001
OX382150.1	700000	-2.41	0.33966
OX382150.1	800000	-1.015	0.32967
OX382150.1	900000	-1.755	0.000999001
OX382150.1	1000000	-3.12	0.000999001
OX382150.1	1100000	-1.47	0.000999001
OX382150.1	1200000	-0.085	0.33966
OX382150.1	1300000	-3.315	0.000999001
OX382150.1	1400000	-3.595	0.000999001
OX382150.1	1500000	-0.315	0.000999001
OX382150.1	1600000	-1.835	0.000999001
OX382150.1	1700000	-2.275	0.32967
OX382150.1	1800000	-2.035	0.000999001
OX382150.1	1900000	-2.47	0.000999001
OX382150.1	2000000	-6.3	0.000999001
OX382150.1	2100000	-0.19	0.33966
OX382150.1	2200000	-4.435	0.000999001
OX382150.1	2300000	-3.905	0.000999001
OX382150.1	2400000	-1.85	0.000999001
OX382150.1	2500000	-0.245	0.000999001
OX382150.1	2600000	0.9	0.32967
OX382150.1	2700000	-1.29	0.000999001
OX382150.1	2800000	-5.165	0.000999001
OX382150.1	2900000	2.22	0.000999001
OX382150.1	3000000	-2.495	0.000999001
OX382150.1	3100000	-8.435	0.000999001
OX382150.1	3200000	-5.25	0.000999001
OX382150.1	3300000	-4.28	0.000999001
OX382150.1	3400000	-1.065	0.000999001
OX382150.1	3500000	-2.795	0.000999001
OX382150.1	3600000	-0.315	0.32967
OX382150.1	3700000	-4.365	0.000999001
OX382150.1	3800000	-0.195	0.000999001
OX382150.1	3900000	1.69	0.000999001
OX382150.1	4000000	-3.875	0.000999001
OX382150.1	4100000	-1.435	0.000999001
OX382150.1	4200000	-0.45	0.33966
OX382150.1	4300000	-3.625	0.000999001
OX382150.1	4400000	-0.105	0.32967
OX382150.1	4500000	-0.45	0.33966
OX382150.1	4600000	-4.1	0.000999001
OX382150.1	4700000	2.355	0.000999001
OX382150.1	4800000	-0.58	0.32967
OX382150.1	4900000	-5.99	0.000999001
OX382150.1	5000000	-1.055	0.000999001
OX382150.1	5100000	-3.38	0.000999001
OX382150.1	5200000	-1.56	0.000999001
OX382150.1	5300000	-1.965	0.000999001
OX382150.1	5400000	-3.05	0.000999001
OX382150.1	5500000	2.68	0.000999001
OX382150.1	5600000	-4.15	0.000999001
OX382150.1	5700000	-1.275	0.32967
OX382150.1	5800000	1.41	0.000999001
OX382150.1	5900000	-1.205	0.000999001
OX382150.1	6000000	-3.955	0.000999001
OX382150.1	6100000	1.685	0.33966
OX382150.1	6200000	-2.14	0.000999001
OX382150.1	6300000	-1.89	0.32967
OX382150.1	6400000	-3.445	0.000999001
OX382150.1	6500000	-0.415	0.33966
OX382150.1	6600000	-2.06	0.000999001
OX382150.1	6700000	-4.61	0.000999001
OX382150.1	6800000	-5.88	0.000999001
OX382150.1	6900000	2.78	0.000999001
OX382150.1	7000000	3.475	0.000999001
OX382150.1	7100000	4.795	0.000999001
OX382150.1	7200000	-2.22	0.000999001
OX382150.1	7300000	-3.85	0.000999001
OX382151.1	0	1.77	0.000999001
OX382151.1	100000	-0.445	0.32967
OX382151.1	200000	-3.11	0.000999001
OX382151.1	300000	-1.025	0.000999001
OX382151.1	400000	-0.82	0.000999001
OX382151.1	500000	-1.265	0.000999001
OX382151.1	600000	-2.455	0.000999001
OX382151.1	700000	0.08	0.32967
OX382151.1	800000	-3.295	0.000999001
OX382151.1	900000	1.51	0.000999001
OX382151.1	1000000	-2.24	0.32967
OX382151.1	1100000	-0.445	0.32967
OX382151.1	1200000	5.415	0.000999001
OX382151.1	1300000	0.515	0.32967
OX382151.1	1400000	1.9	0.000999001
OX382151.1	1500000	-0.34	0.000999001
OX382151.1	1600000	0.165	0.33966
OX382151.1	1700000	8.05	0.000999001
OX382151.1	1800000	5.07	0.000999001
OX382151.1	1900000	-1.165	0.000999001
OX382151.1	2000000	0.92	0.000999001
OX382151.1	2100000	0.785	0.32967
OX382151.1	2200000	-0.97	0.32967
OX382151.1	2300000	-1.985	0.32967
OX382151.1	2400000	-4.17	0.000999001
OX382151.1	2500000	-2.22	0.000999001
OX382151.1	2600000	-0.825	0.000999001
OX382151.1	2700000	-1.915	0.000999001
OX382151.1	2800000	-2.37	0.000999001
OX382151.1	2900000	-0.255	0.000999001
OX382151.1	3000000	1.055	0.33966
OX382151.1	3100000	1.61	0.000999001
OX382151.1	3200000	0.705	0.33966
OX382151.1	3300000	-1.135	0.000999001
OX382151.1	3400000	0.525	0.32967
OX382151.1	3500000	-1.72	0.33966
OX382151.1	3600000	-0.08	0.32967
OX382151.1	3700000	-3.425	0.000999001
OX382151.1	3800000	-5.665	0.000999001
OX382151.1	3900000	-2.545	0.000999001
OX382151.1	4000000	0.675	0.33966
OX382151.1	4100000	-0.1	0.000999001
OX382152.1	0	0.055	0.33966
OX382152.1	100000	-0.38	0.000999001
OX382152.1	200000	-5.185	0.000999001
OX382152.1	300000	-0.865	0.33966
OX382152.1	400000	-1.045	0.32967
OX382152.1	500000	-1.405	0.32967
OX382152.1	600000	-0.395	0.000999001
OX382152.1	700000	-0.725	0.000999001
OX382152.1	800000	0.45	0.000999001
OX382152.1	900000	1.265	0.000999001
OX382152.1	1000000	-0.425	0.33966
OX382152.1	1100000	0.05	0.32967
OX382152.1	1200000	2.415	0.000999001
OX382152.1	1300000	-2.24	0.000999001
OX382152.1	1400000	-2.895	0.000999001
OX382152.1	1500000	-1.75	0.000999001
OX382152.1	1600000	3.49	0.000999001
OX382152.1	1700000	3.025	0.000999001
OX382152.1	1800000	1.35	0.000999001
OX382152.1	1900000	-3.02	0.000999001
OX382152.1	2000000	1.585	0.000999001
OX382152.1	2100000	-0.09	0.000999001
OX382152.1	2200000	-0.055	0.32967
OX382152.1	2300000	-0.925	0.32967
OX382152.1	2400000	3.66	0.000999001
OX382152.1	2500000	-0.38	0.33966
OX382152.1	2600000	-1.055	0.000999001
OX382152.1	2700000	0.045	0.33966
OX382152.1	2800000	-5.13	0.000999001
OX382152.1	2900000	1.165	0.32967
OX382152.1	3000000	-0.155	0.000999001
OX382152.1	3100000	-0.34	0.33966
OX382152.1	3200000	0.23	0.33966
OX382152.1	3300000	-0.35	0.000999001
OX382152.1	3400000	-0.23	0.000999001
OX382152.1	3500000	-0.59	0.000999001
OX382152.1	3600000	-0.46	0.000999001
OX382152.1	3700000	-1.355	0.000999001
OX382152.1	3800000	-1.28	0.000999001
OX382152.1	3900000	-1.24	0.000999001
OX382153.1	0	0.595	0.000999001
OX382153.1	100000	0.08	0.000999001
OX382153.1	200000	-1.16	0.000999001
OX382153.1	300000	0.13	0.33966
OX382153.1	400000	-0.68	0.32967
OX382153.1	500000	-0.625	0.000999001
OX382153.1	600000	-0.575	0.33966
OX382153.1	700000	0.27	0.33966
OX382153.1	800000	-0.08	0.000999001
OX382153.1	900000	0.155	0.33966
OX382153.1	1000000	-0.875	0.000999001
OX382153.1	1100000	-1.02	0.000999001
OX382153.1	1200000	1.82	0.000999001
OX382153.1	1300000	1.12	0.000999001
OX382153.1	1400000	-1.205	0.000999001
OX382153.1	1500000	0.16	0.33966
OX382153.1	1600000	-1.415	0.000999001
OX382153.1	1700000	-0.66	0.000999001
OX382153.1	1800000	-1.8	0.000999001
OX382153.1	1900000	0.195	0.33966
OX382153.1	2000000	-0.1	0.32967
OX382153.1	2100000	-1.23	0.000999001
OX382153.1	2200000	0.185	0.32967
OX382153.1	2300000	-1.695	0.000999001
OX382153.1	2400000	0.195	0.32967
OX382153.1	2500000	1.485	0.000999001
OX382153.1	2600000	-0.055	0.33966
OX382153.1	2700000	0.205	0.33966
OX382153.1	2800000	-1.005	0.000999001
OX382153.1	2900000	-0.015	0.33966
OX382153.1	3000000	2.575	0.000999001
OX382153.1	3100000	0.76	0.000999001
OX382153.1	3200000	-0.84	0.000999001
OX382153.1	3300000	-0.045	0.32967
OX382153.1	3400000	0.62	0.33966
OX382153.1	3500000	1.015	0.000999001
OX382153.1	3600000	-0.38	0.32967
OX382154.1	0	1.155	0.000999001
OX382154.1	100000	0.26	0.32967
OX382154.1	200000	-0.825	0.000999001
OX382154.1	300000	-1.405	0.000999001
OX382154.1	400000	0.88	0.000999001
OX382154.1	500000	0.145	0.32967
OX382154.1	600000	-1.09	0.000999001
OX382154.1	700000	0.54	0.32967
OX382154.1	800000	0.54	0.000999001
OX382154.1	900000	0.47	0.000999001
OX382154.1	1000000	-1.72	0.000999001
OX382154.1	1100000	-0.3	0.000999001
OX382154.1	1200000	-0.795	0.000999001
OX382154.1	1300000	1.385	0.000999001
OX382154.1	1400000	-2.43	0.000999001
OX382154.1	1500000	0.67	0.000999001
OX382154.1	1600000	2.92	0.000999001
OX382154.1	1700000	-0.885	0.000999001
OX382154.1	1800000	3.775	0.000999001
OX382154.1	1900000	-2.665	0.000999001
OX382154.1	2000000	-4.38	0.000999001
OX382154.1	2100000	-4.355	0.000999001
OX382154.1	2200000	-6.88	0.000999001
OX382154.1	2300000	-3.06	0.000999001
OX382154.1	2400000	-8.37	0.000999001
OX382154.1	2500000	-5.895	0.000999001
OX382154.1	2600000	-8.56	0.000999001
OX382154.1	2700000	-10.68	0.000999001
OX382154.1	2800000	-4.22	0.000999001
OX382154.1	2900000	-6.255	0.000999001
OX382154.1	3000000	-1.795	0.33966
OX382154.1	3100000	0.38	0.32967
OX382154.1	3200000	-1.8	0.000999001
OX382154.1	3300000	-4.475	0.000999001
OX382154.1	3400000	-0.44	0.33966
OX382154.1	3500000	-1.81	0.000999001
OX382154.1	3600000	-0.745	0.000999001
OX382155.1	0	-0.27	0.000999001
OX382155.1	100000	-0.74	0.000999001
OX382155.1	200000	-0.07	0.000999001
OX382155.1	300000	0.575	0.000999001
OX382155.1	400000	-0.79	0.000999001
OX382155.1	500000	0.59	0.000999001
OX382155.1	600000	-0.07	0.33966
OX382155.1	700000	-0.25	0.33966
OX382155.1	800000	1.28	0.000999001
OX382155.1	900000	-0.72	0.000999001
OX382155.1	1000000	-6.1	0.000999001
OX382155.1	1100000	2.865	0.000999001
OX382155.1	1200000	-0.11	0.32967
OX382155.1	1300000	-0.335	0.000999001
OX382155.1	1400000	-3.195	0.000999001
OX382155.1	1500000	-1.63	0.000999001
OX382155.1	1600000	-1.11	0.000999001
OX382155.1	1700000	-0.26	0.33966
OX382155.1	1800000	0.23	0.32967
OX382155.1	1900000	-0.21	0.000999001
OX382155.1	2000000	-1.22	0.000999001
OX382155.1	2100000	-1.69	0.000999001
OX382155.1	2200000	-0.835	0.000999001
OX382155.1	2300000	-1.51	0.000999001
OX382155.1	2400000	-1.34	0.000999001
OX382155.1	2500000	-1.98	0.000999001
OX382155.1	2600000	-0.225	0.32967
OX382155.1	2700000	-0.475	0.33966
OX382155.1	2800000	0.015	0.32967
OX382155.1	2900000	-1.355	0.000999001
OX382155.1	3000000	-0.515	0.000999001
OX382155.1	3100000	1.43	0.000999001
OX382155.1	3200000	0.835	0.32967
OX382155.1	3300000	-2.66	0.000999001
OX382155.1	3400000	-3.4	0.000999001
OX382155.1	3500000	-1.045	0.000999001
OX382156.1	0	-0.635	0.32967
OX382156.1	100000	-1.145	0.000999001
OX382156.1	200000	-0.63	0.000999001
OX382156.1	300000	0.135	0.32967
OX382156.1	400000	-1.96	0.000999001
OX382156.1	500000	-1.75	0.000999001
OX382156.1	600000	-1.08	0.33966
OX382156.1	700000	-0.24	0.33966
OX382156.1	800000	0.06	0.32967
OX382156.1	900000	-3.675	0.000999001
OX382156.1	1000000	-0.47	0.33966
OX382156.1	1100000	-3.3	0.000999001
OX382156.1	1200000	-0.145	0.33966
OX382156.1	1300000	-4.17	0.000999001
OX382156.1	1400000	0.54	0.32967
OX382156.1	1500000	-2.79	0.000999001
OX382156.1	1600000	-0.135	0.33966
OX382156.1	1700000	0.005	0.32967
OX382156.1	1800000	-1.955	0.000999001
OX382156.1	1900000	-0.155	0.33966
OX382156.1	2000000	-1.94	0.000999001
OX382156.1	2100000	1.54	0.000999001
OX382156.1	2200000	0.4	0.33966
OX382156.1	2300000	-1.21	0.000999001
OX382156.1	2400000	0.35	0.33966
OX382156.1	2500000	0.47	0.000999001
OX382156.1	2600000	-0.33	0.33966
OX382156.1	2700000	0.005	0.32967
OX382156.1	2800000	0.66	0.000999001
OX382156.1	2900000	0.135	0.33966
OX382156.1	3000000	-0.325	0.000999001
OX382156.1	3100000	-0.645	0.000999001
OX382156.1	3200000	-1.015	0.000999001
OX382156.1	3300000	0.47	0.000999001
OX382156.1	3400000	0.295	0.000999001
OX382157.1	0	-1.605	0.000999001
OX382157.1	100000	0.155	0.32967
OX382157.1	200000	-1.8	0.000999001
OX382157.1	300000	-1.95	0.000999001
OX382157.1	400000	-0.745	0.000999001
OX382157.1	500000	-4.18	0.000999001
OX382157.1	600000	-0.13	0.33966
OX382157.1	700000	0.305	0.33966
OX382157.1	800000	0.945	0.000999001
OX382157.1	900000	-0.055	0.32967
OX382157.1	1000000	-0.255	0.32967
OX382157.1	1100000	0.48	0.000999001
OX382157.1	1200000	-1.73	0.000999001
OX382157.1	1300000	5.48	0.000999001
OX382157.1	1400000	2.37	0.32967
OX382157.1	1500000	1.53	0.32967
OX382157.1	1600000	1.44	0.000999001
OX382157.1	1700000	-0.79	0.000999001
OX382157.1	1800000	-0.175	0.32967
OX382157.1	1900000	-2.245	0.000999001
OX382157.1	2000000	-1.245	0.000999001
OX382157.1	2100000	0.1	0.33966
OX382157.1	2200000	-3.015	0.000999001
OX382157.1	2300000	-0.215	0.32967
OX382157.1	2400000	-1.46	0.000999001
OX382157.1	2500000	-0.395	0.32967
OX382157.1	2600000	-2.56	0.000999001
OX382157.1	2700000	-3.965	0.000999001
OX382157.1	2800000	2.23	0.000999001
OX382157.1	2900000	-4.755	0.000999001
OX382157.1	3000000	-2.25	0.000999001
OX382157.1	3100000	-0.81	0.000999001
OX382157.1	3200000	-0.975	0.000999001
OX382157.1	3300000	-0.565	0.32967
OX382157.1	3400000	-0.21	0.32967
OX382158.1	0	-0.17	0.000999001
OX382158.1	100000	0.425	0.000999001
OX382158.1	200000	-2.35	0.000999001
OX382158.1	300000	-0.515	0.000999001
OX382158.1	400000	-0.475	0.32967
OX382158.1	500000	1.555	0.33966
OX382158.1	600000	-3.16	0.000999001
OX382158.1	700000	-3.56	0.000999001
OX382158.1	800000	1.2	0.33966
OX382158.1	900000	-3.32	0.000999001
OX382158.1	1000000	1.27	0.32967
OX382158.1	1100000	0.65	0.32967
OX382158.1	1200000	-1.68	0.33966
OX382158.1	1300000	12.575	0.000999001
OX382158.1	1400000	-1.005	0.33966
OX382158.1	1500000	-0.035	0.33966
OX382158.1	1600000	0.64	0.32967
OX382158.1	1700000	1.535	0.32967
OX382158.1	1800000	1.575	0.32967
OX382158.1	1900000	1.04	0.32967
OX382158.1	2000000	0.355	0.32967
OX382158.1	2100000	-0.645	0.33966
OX382158.1	2200000	-1.275	0.33966
OX382158.1	2300000	-0.395	0.33966
OX382158.1	2400000	-3.33	0.000999001
OX382158.1	2500000	-2.875	0.000999001
OX382158.1	2600000	-0.395	0.33966
OX382158.1	2700000	1.745	0.000999001
OX382158.1	2800000	1.16	0.33966
OX382158.1	2900000	-1.77	0.32967
OX382158.1	3000000	-4.61	0.000999001
OX382158.1	3100000	0.84	0.000999001
OX382158.1	3200000	-5.495	0.000999001
OX382158.1	3300000	-0.92	0.000999001
OX382159.1	0	-0.925	0.000999001
OX382159.1	100000	-0.175	0.33966
OX382159.1	200000	-0.255	0.000999001
OX382159.1	300000	-0.505	0.33966
OX382159.1	400000	-2.77	0.000999001
OX382159.1	500000	-1.375	0.000999001
OX382159.1	600000	0.99	0.000999001
OX382159.1	700000	1.565	0.33966
OX382159.1	800000	0.205	0.000999001
OX382159.1	900000	0.89	0.000999001
OX382159.1	1000000	0.11	0.33966
OX382159.1	1100000	0.015	0.33966
OX382159.1	1200000	-1.245	0.000999001
OX382159.1	1300000	0.105	0.33966
OX382159.1	1400000	0.155	0.33966
OX382159.1	1500000	-4.85	0.000999001
OX382159.1	1600000	-0.175	0.32967
OX382159.1	1700000	-0.2	0.000999001
OX382159.1	1800000	-3.15	0.000999001
OX382159.1	1900000	-1.54	0.000999001
OX382159.1	2000000	2.495	0.000999001
OX382159.1	2100000	1.935	0.32967
OX382159.1	2200000	3.29	0.000999001
OX382159.1	2300000	4.34	0.000999001
OX382159.1	2400000	1.53	0.000999001
OX382159.1	2500000	-1.825	0.32967
OX382159.1	2600000	-0.415	0.32967
OX382159.1	2700000	1.195	0.33966
OX382159.1	2800000	-2.235	0.32967
OX382159.1	2900000	-3.39	0.000999001
OX382159.1	3000000	-1.085	0.32967
OX382159.1	3100000	-3.57	0.000999001
OX382159.1	3200000	-0.38	0.000999001
OX382160.1	0	0.195	0.32967
OX382160.1	100000	-0.545	0.000999001
OX382160.1	200000	-0.145	0.000999001
OX382160.1	300000	-0.62	0.000999001
OX382160.1	400000	0.55	0.000999001
OX382160.1	500000	-0.83	0.000999001
OX382160.1	600000	-0.95	0.000999001
OX382160.1	700000	-0.955	0.000999001
OX382160.1	800000	-0.86	0.000999001
OX382160.1	900000	0.74	0.33966
OX382160.1	1000000	1.575	0.000999001
OX382160.1	1100000	0.86	0.33966
OX382160.1	1200000	-0.905	0.000999001
OX382160.1	1300000	-2.095	0.000999001
OX382160.1	1400000	-1.5	0.000999001
OX382160.1	1500000	0.705	0.33966
OX382160.1	1600000	0.935	0.33966
OX382160.1	1700000	3.64	0.000999001
OX382160.1	1800000	4.72	0.33966
OX382160.1	1900000	5.895	0.000999001
OX382160.1	2000000	4.165	0.000999001
OX382160.1	2100000	6.76	0.000999001
OX382160.1	2200000	2.505	0.000999001
OX382160.1	2300000	-2.2	0.32967
OX382160.1	2400000	0.015	0.32967
OX382160.1	2500000	0.085	0.32967
OX382160.1	2600000	0.68	0.000999001
OX382160.1	2700000	-1.36	0.32967
OX382160.1	2800000	-2.035	0.000999001
OX382160.1	2900000	2.67	0.000999001
OX382160.1	3000000	-1.53	0.000999001
OX382160.1	3100000	-1.665	0.000999001
OX382160.1	3200000	-0.7	0.000999001
OX382161.1	0	2	0.000999001
OX382161.1	100000	-0.52	0.000999001
OX382161.1	200000	-3.95	0.000999001
OX382161.1	300000	-1.49	0.33966
OX382161.1	400000	-3.435	0.000999001
OX382161.1	500000	-1.26	0.000999001
OX382161.1	600000	7.715	0.000999001
OX382161.1	700000	-3.055	0.000999001
OX382161.1	800000	-2.055	0.000999001
OX382161.1	900000	-2.81	0.000999001
OX382161.1	1000000	-1.51	0.000999001
OX382161.1	1100000	3.06	0.000999001
OX382161.1	1200000	0.03	0.32967
OX382161.1	1300000	-2.68	0.000999001
OX382161.1	1400000	-6.995	0.000999001
OX382161.1	1500000	-7.79	0.000999001
OX382161.1	1600000	-3.225	0.000999001
OX382161.1	1700000	-0.115	0.33966
OX382161.1	1800000	0.385	0.000999001
OX382161.1	1900000	1.72	0.000999001
OX382161.1	2000000	-2.655	0.000999001
OX382161.1	2100000	-0.04	0.32967
OX382161.1	2200000	0.225	0.33966
OX382161.1	2300000	-1.865	0.000999001
OX382161.1	2400000	-3.11	0.000999001
OX382161.1	2500000	-0.44	0.000999001
OX382161.1	2600000	-8.325	0.000999001
OX382161.1	2700000	1.7	0.32967
OX382162.1	0	0.135	0.32967
OX382162.1	100000	1.025	0.000999001
OX382162.1	200000	0.14	0.000999001
OX382162.1	300000	0.215	0.33966
OX382162.1	400000	1.08	0.000999001
OX382162.1	500000	1.17	0.32967
OX382162.1	600000	-1.195	0.32967
OX382162.1	700000	-0.94	0.32967
OX382162.1	800000	-0.98	0.000999001
OX382162.1	900000	-8.97	0.000999001
OX382162.1	1000000	-6.07	0.000999001
OX382162.1	1100000	-2.455	0.000999001
OX382162.1	1200000	-0.335	0.33966
OX382162.1	1300000	-4.535	0.000999001
OX382162.1	1400000	0.69	0.32967
OX382162.1	1500000	-1.01	0.000999001
OX382162.1	1600000	-5.89	0.000999001
OX382162.1	1700000	-8.95	0.000999001
OX382162.1	1800000	-8.345	0.000999001
OX382162.1	1900000	3.125	0.000999001
OX382162.1	2000000	0.985	0.000999001
OX382162.1	2100000	-1.66	0.000999001
OX382162.1	2200000	-2.11	0.000999001
OX382162.1	2300000	1.78	0.000999001
OX382162.1	2400000	1.675	0.33966
OX382162.1	2500000	-0.42	0.32967
OX382162.1	2600000	-0.64	0.000999001
OX382163.1	0	-1.205	0.000999001
OX382163.1	100000	-2.125	0.000999001
OX382163.1	200000	-4.62	0.000999001
OX382163.1	300000	-5.915	0.000999001
OX382163.1	400000	-6.98	0.000999001
OX382163.1	500000	-1.365	0.000999001
OX382163.1	600000	-2.77	0.000999001
OX382163.1	700000	-1.5	0.000999001
OX382163.1	800000	-2.775	0.000999001
OX382163.1	900000	0.385	0.32967
OX382163.1	1000000	-2.39	0.000999001
OX382163.1	1100000	-1.245	0.000999001
OX382163.1	1200000	0.785	0.000999001
OX382163.1	1300000	-2.08	0.000999001
OX382163.1	1400000	1.735	0.000999001
OX382163.1	1500000	-1.475	0.000999001
OX382163.1	1600000	-0.165	0.33966
OX382163.1	1700000	-1.12	0.000999001
OX382163.1	1800000	0.36	0.000999001
OX382163.1	1900000	-0.62	0.000999001
OX382163.1	2000000	-1.925	0.000999001
OX382163.1	2100000	0.285	0.000999001
OX382163.1	2200000	0.475	0.000999001
OX382163.1	2300000	-0.945	0.000999001
OX382163.1	2400000	0.23	0.000999001
OX382163.1	2500000	-0.7	0.32967
OX382164.1	0	-0.575	0.32967
OX382164.1	100000	-1.105	0.32967
OX382164.1	200000	-1.565	0.000999001
OX382164.1	300000	-0.275	0.000999001
OX382164.1	400000	-0.155	0.33966
OX382164.1	500000	0.755	0.32967
OX382164.1	600000	-1.105	0.33966
OX382164.1	700000	2.145	0.33966
OX382164.1	800000	-1.79	0.000999001
OX382164.1	900000	-1.28	0.000999001
OX382164.1	1000000	2.27	0.000999001
OX382164.1	1100000	-5.87	0.000999001
OX382164.1	1200000	-2.16	0.000999001
OX382164.1	1300000	0.675	0.33966
OX382164.1	1400000	1.8	0.000999001
OX382164.1	1500000	-0.415	0.32967
OX382164.1	1600000	-0.375	0.000999001
OX382164.1	1700000	0.09	0.32967
OX382164.1	1800000	-3.205	0.32967
OX382164.1	1900000	-0.575	0.000999001
OX382164.1	2000000	-0.885	0.32967
OX382164.1	2100000	-1.11	0.000999001
OX382164.1	2200000	-2.45	0.33966
OX382164.1	2300000	-3.15	0.000999001
OX382164.1	2400000	-0.93	0.000999001
OX382165.1	0	-1.09	0.000999001
OX382165.1	100000	1.585	0.33966
OX382165.1	200000	2.525	0.32967
OX382165.1	300000	3.44	0.000999001
OX382165.1	400000	0.835	0.32967
OX382165.1	500000	1.47	0.32967
OX382165.1	600000	0.46	0.000999001
OX382165.1	700000	-2.165	0.000999001
OX382165.1	800000	2.82	0.000999001
OX382165.1	900000	-1.715	0.000999001
OX382165.1	1000000	2.425	0.000999001
OX382165.1	1100000	-6.225	0.000999001
OX382165.1	1200000	-0.62	0.000999001
OX382165.1	1300000	-2.825	0.000999001
OX382165.1	1400000	-0.605	0.32967
OX382165.1	1500000	-1.78	0.000999001
OX382165.1	1600000	-1.755	0.000999001
OX382165.1	1700000	-0.17	0.32967
OX382165.1	1800000	-0.06	0.32967
OX382165.1	1900000	-0.015	0.33966
OX382165.1	2000000	-0.23	0.32967
OX382165.1	2100000	1.325	0.000999001
OX382165.1	2200000	-2.73	0.000999001
OX382165.1	2300000	0.53	0.000999001
OX382165.1	2400000	-1.93	0.000999001
OX382166.1	0	0.555	0.000999001
OX382166.1	100000	0.07	0.33966
OX382166.1	200000	-1.085	0.000999001
OX382166.1	300000	0.36	0.000999001
OX382166.1	400000	-0.785	0.32967
OX382166.1	500000	-0.06	0.32967
OX382166.1	600000	-0.19	0.000999001
OX382166.1	700000	-1.31	0.000999001
OX382166.1	800000	0.395	0.32967
OX382166.1	900000	0.55	0.32967
OX382166.1	1000000	-0.13	0.32967
OX382166.1	1100000	1.595	0.000999001
OX382166.1	1200000	-0.23	0.33966
OX382166.1	1300000	2.225	0.000999001
OX382166.1	1400000	-2.7	0.000999001
OX382166.1	1500000	-2.05	0.000999001
OX382166.1	1600000	-1.95	0.000999001
OX382166.1	1700000	-13.455	0.000999001
OX382166.1	1800000	-2.495	0.000999001
OX382166.1	1900000	-2.39	0.000999001
OX382166.1	2000000	1.82	0.000999001
OX382166.1	2100000	0.955	0.33966
OX382166.1	2200000	-1.3	0.000999001
OX382166.1	2300000	-0.67	0.000999001
OX382167.1	0	-0.21	0.33966
OX382167.1	100000	0.135	0.32967
OX382167.1	200000	-1.5	0.000999001
OX382167.1	300000	0.54	0.33966
OX382167.1	400000	0.815	0.000999001
OX382167.1	500000	0.99	0.000999001
OX382167.1	600000	-2.2	0.000999001
OX382167.1	700000	-0.265	0.000999001
OX382167.1	800000	-2.355	0.000999001
OX382167.1	900000	0.31	0.33966
OX382167.1	1000000	-0.575	0.32967
OX382167.1	1100000	-1.66	0.000999001
OX382167.1	1200000	-2.235	0.000999001
OX382167.1	1300000	-4.365	0.000999001
OX382167.1	1400000	4.875	0.000999001
OX382167.1	1500000	-7.44	0.000999001
OX382167.1	1600000	-2.83	0.000999001
OX382167.1	1700000	-1.59	0.33966
OX382167.1	1800000	-3.265	0.000999001
OX382167.1	1900000	-2.725	0.32967
OX382167.1	2000000	4.475	0.33966
OX382167.1	2100000	-2.275	0.000999001
OX382167.1	2200000	-3.795	0.000999001
OX382167.1	2300000	-0.105	0.32967
OX382168.1	0	-2.485	0.000999001
OX382168.1	100000	-1.085	0.000999001
OX382168.1	200000	-0.355	0.32967
OX382168.1	300000	-4.865	0.000999001
OX382168.1	400000	-8.09	0.000999001
OX382168.1	500000	-11.845	0.000999001
OX382168.1	600000	-6.425	0.000999001
OX382168.1	700000	10.97	0.000999001
OX382168.1	800000	-2.035	0.000999001
OX382168.1	900000	-3.07	0.000999001
OX382168.1	1000000	-1.79	0.000999001
OX382168.1	1100000	1.25	0.000999001
OX382168.1	1200000	-2.94	0.000999001
OX382168.1	1300000	-0.36	0.33966
OX382168.1	1400000	0.315	0.33966
OX382168.1	1500000	-2.485	0.000999001
OX382168.1	1600000	-1.195	0.000999001
OX382168.1	1700000	-0.055	0.000999001
OX382168.1	1800000	-0.85	0.000999001
OX382168.1	1900000	0.075	0.33966
OX382168.1	2000000	-1.495	0.000999001
OX382168.1	2100000	0.015	0.33966
OX382169.1	0	-0.37	0.000999001
OX382169.1	100000	-4.535	0.000999001
OX382169.1	200000	-7.775	0.000999001
OX382169.1	300000	-5.415	0.000999001
OX382169.1	400000	-5.91	0.32967
OX382169.1	500000	-9.335	0.000999001
OX382169.1	600000	-3.975	0.000999001
OX382169.1	700000	-3	0.000999001
OX382169.1	800000	0.31	0.33966
OX382169.1	900000	1.395	0.000999001
OX382169.1	1000000	0.32	0.32967
OX382169.1	1100000	-3.145	0.000999001
OX382169.1	1200000	-0.765	0.33966
OX382169.1	1300000	-4.28	0.000999001
OX382169.1	1400000	-0.785	0.32967
OX382169.1	1500000	-1.145	0.000999001
OX382169.1	1600000	-0.85	0.000999001
OX382169.1	1700000	0.59	0.000999001
OX382169.1	1800000	-0.925	0.000999001
OX382169.1	1900000	-1.715	0.000999001
OX382169.1	2000000	-1.725	0.000999001
CANNPT010000001.1	0	-4.455	0.000999001
CANNPT010000001.1	100000	-4.505	0.000999001
OX382170.1	0	-0.02	0.000999001

## Sheet: SNPdensity_SexFindR_Petfic
scaf	base	mean_MvF_dif	Pvalue
OX345636.1	0	0.28	0.000999001
OX345636.1	100000	4.14667	0.000999001
OX345636.1	200000	4.51	0.000999001
OX345636.1	300000	0.9	0.000999001
OX345636.1	400000	3.68333	0.000999001
OX345636.1	500000	2.24	0.000999001
OX345636.1	600000	2.95333	0.000999001
OX345636.1	700000	1.99667	0.000999001
OX345636.1	800000	0.96	0.000999001
OX345636.1	900000	3.79333	0.000999001
OX345636.1	1000000	1.81667	0.000999001
OX345636.1	1100000	4.8	0.000999001
OX345636.1	1200000	0.98	0.000999001
OX345636.1	1300000	3.09667	0.000999001
OX345636.1	1400000	2.08333	0.000999001
OX345636.1	1500000	2.89	0.000999001
OX345636.1	1600000	1.63333	0.000999001
OX345636.1	1700000	1.63333	0.000999001
OX345636.1	1800000	3.62	0.000999001
OX345636.1	1900000	8.53333	0.000999001
OX345636.1	2000000	6.91667	0.000999001
OX345636.1	2100000	5.32	0.000999001
OX345636.1	2200000	4.93667	0.000999001
OX345636.1	2300000	3.67667	0.000999001
OX345636.1	2400000	5.74	0.000999001
OX345636.1	2500000	7.70667	0.000999001
OX345636.1	2600000	3.46333	0.000999001
OX345636.1	2700000	5.62333	0.000999001
OX345636.1	2800000	5.17667	0.000999001
OX345636.1	2900000	7.63333	0.000999001
OX345636.1	3000000	6.59333	0.000999001
OX345636.1	3100000	8.79333	0.000999001
OX345636.1	3200000	8.18667	0.000999001
OX345636.1	3300000	5.56	0.000999001
OX345636.1	3400000	3.41	0.000999001
OX345636.1	3500000	4.62	0.000999001
OX345636.1	3600000	1.98	0.193806
OX345636.1	3700000	3.74667	0.0919081
OX345636.1	3800000	3.78667	0.000999001
OX345636.1	3900000	8.57667	0.000999001
OX345636.1	4000000	9.22	0.000999001
OX345636.1	4100000	8.63	0.000999001
OX345636.1	4200000	6.51	0.000999001
OX345636.1	4300000	8.08667	0.000999001
OX345636.1	4400000	5.87333	0.000999001
OX345636.1	4500000	12.0433	0.000999001
OX345636.1	4600000	7.4	0.000999001
OX345636.1	4700000	12.0067	0.000999001
OX345636.1	4800000	10.2733	0.000999001
OX345636.1	4900000	13	0.000999001
OX345636.1	5000000	11.0267	0.000999001
OX345636.1	5100000	6.99	0.000999001
OX345636.1	5200000	12.2767	0.000999001
OX345636.1	5300000	10.5467	0.000999001
OX345636.1	5400000	6.50333	0.000999001
OX345636.1	5500000	7.93667	0.000999001
OX345636.1	5600000	10.2733	0.000999001
OX345636.1	5700000	11.03	0.000999001
OX345636.1	5800000	11.4433	0.000999001
OX345636.1	5900000	9.55	0.000999001
OX345636.1	6000000	10.82	0.000999001
OX345636.1	6100000	8.27333	0.000999001
OX345636.1	6200000	10.9467	0.000999001
OX345636.1	6300000	2.12	0.000999001
OX345636.1	6400000	2.11667	0.000999001
OX345636.1	6500000	1.32	0.000999001
OX345636.1	6600000	2.48	0.000999001
OX345636.1	6700000	1.13	0.000999001
OX345636.1	6800000	2.79	0.000999001
OX345636.1	6900000	1.68667	0.000999001
OX345636.1	7000000	0.84	0.000999001
OX345636.1	7100000	3.53333	0.000999001
OX345636.1	7200000	1.35	0.000999001
OX345636.1	7300000	1.31667	0.043956
OX345636.1	7400000	1.98333	0.000999001
OX345636.1	7500000	1.81667	0.000999001
OX345636.1	7600000	1.54	0.000999001
OX345636.1	7700000	1.73	0.000999001
OX345636.1	7800000	0.89	0.000999001
OX345636.1	7900000	1.22333	0.000999001
OX345636.1	8000000	1.90667	0.000999001
OX345636.1	8100000	2.58333	0.000999001
OX345636.1	8200000	1.50667	0.000999001
OX345636.1	8300000	2.33333	0.000999001
OX345636.1	8400000	2.03667	0.000999001
OX345636.1	8500000	2.42	0.000999001
OX345636.1	8600000	1.04333	0.000999001
OX345636.1	8700000	2.21333	0.000999001
OX345636.1	8800000	1.64	0.000999001
OX345636.1	8900000	3.77333	0.000999001
OX345636.1	9000000	7.93667	0.000999001
OX345636.1	9100000	9.71667	0.000999001
OX345636.1	9200000	6.45667	0.000999001
OX345636.1	9300000	10.5067	0.000999001
OX345636.1	9400000	11.27	0.000999001
OX345636.1	9500000	9.95667	0.000999001
OX345636.1	9600000	11.6867	0.000999001
OX345636.1	9700000	7.52	0.000999001
OX345636.1	9800000	8.38	0.000999001
OX345636.1	9900000	10.2833	0.000999001
OX345636.1	10000000	11.82	0.000999001
OX345636.1	10100000	8.22333	0.000999001
OX345636.1	10200000	12.08	0.000999001
OX345636.1	10300000	5.55333	0.000999001
OX345636.1	10400000	9.13	0.000999001
OX345636.1	10500000	2.63	0.0949051
OX345636.1	10600000	5.82333	0.0519481
OX345636.1	10700000	5.34667	0.000999001
OX345636.1	10800000	9.79	0.000999001
OX345636.1	10900000	7.45667	0.000999001
OX345636.1	11000000	4.84333	0.000999001
OX345636.1	11100000	7.70333	0.000999001
OX345636.1	11200000	3.50333	0.0519481
OX345636.1	11300000	10.23	0.000999001
OX345636.1	11400000	6.56	0.000999001
OX345636.1	11500000	10.8033	0.000999001
OX345636.1	11600000	8.75333	0.000999001
OX345636.1	11700000	11.4033	0.000999001
OX345636.1	11800000	8.46	0.000999001
OX345636.1	11900000	8.50667	0.000999001
OX345636.1	12000000	4.76333	0.000999001
OX345636.1	12100000	12.23	0.000999001
OX345636.1	12200000	12.5233	0.000999001
OX345636.1	12300000	9.99667	0.000999001
OX345636.1	12400000	10.0967	0.000999001
OX345636.1	12500000	8.47	0.000999001
OX345636.1	12600000	9.46667	0.000999001
OX345636.1	12700000	9.69667	0.000999001
OX345636.1	12800000	13.35	0.000999001
OX345636.1	12900000	7.24667	0.000999001
OX345636.1	13000000	10.71	0.000999001
OX345636.1	13100000	8.81333	0.000999001
OX345636.1	13200000	10.38	0.000999001
OX345636.1	13300000	9.09667	0.000999001
OX345636.1	13400000	8.12667	0.000999001
OX345636.1	13500000	6.81667	0.000999001
OX345636.1	13600000	6.38	0.045954
OX345636.1	13700000	11.32	0.000999001
OX345636.1	13800000	11.73	0.000999001
OX345636.1	13900000	4.77667	0.000999001
OX345636.1	14000000	10.7233	0.000999001
OX345636.1	14100000	5.44333	0.000999001
OX345636.1	14200000	7.48	0.000999001
OX345636.1	14300000	10.66	0.000999001
OX345636.1	14400000	11.1	0.000999001
OX345636.1	14500000	3.59667	0.000999001
OX345636.1	14600000	7.87667	0.000999001
OX345636.1	14700000	10.8433	0.000999001
OX345636.1	14800000	10.9633	0.000999001
OX345636.1	14900000	12.92	0.000999001
OX345636.1	15000000	7.9	0.000999001
OX345636.1	15100000	4.45	0.043956
OX345636.1	15200000	4.54333	0.000999001
OX345636.1	15300000	6.07	0.000999001
OX345636.1	15400000	11.54	0.000999001
OX345636.1	15500000	6.80667	0.043956
OX345636.1	15600000	8.42667	0.000999001
OX345636.1	15700000	10.94	0.000999001
OX345636.1	15800000	11	0.000999001
OX345636.1	15900000	9.90667	0.000999001
OX345636.1	16000000	13.05	0.000999001
OX345636.1	16100000	13.4033	0.000999001
OX345636.1	16200000	10.15	0.000999001
OX345636.1	16300000	9.93	0.000999001
OX345636.1	16400000	8.23	0.000999001
OX345636.1	16500000	7.18333	0.000999001
OX345636.1	16600000	14.9767	0.000999001
OX345636.1	16700000	2.61667	0.000999001
OX345636.1	16800000	5.05	0.000999001
OX345636.1	16900000	5.51	0.000999001
OX345636.1	17000000	11.82	0.000999001
OX345636.1	17100000	5.00667	0.000999001
OX345636.1	17200000	3.31	0.000999001
OX345636.1	17300000	6.31667	0.000999001
OX345636.1	17400000	5.91667	0.000999001
OX345636.1	17500000	9.74	0.000999001
OX345636.1	17600000	10.5133	0.000999001
OX345636.1	17700000	10.7367	0.000999001
OX345636.1	17800000	4.57667	0.000999001
OX345636.1	17900000	3.07667	0.000999001
OX345636.1	18000000	7.63667	0.000999001
OX345636.1	18100000	10.53	0.000999001
OX345636.1	18200000	8.71333	0.000999001
OX345636.1	18300000	5.49667	0.000999001
OX345636.1	18400000	11.8833	0.000999001
OX345636.1	18500000	11.8033	0.000999001
OX345636.1	18600000	10.0533	0.000999001
OX345636.1	18700000	5.34333	0.000999001
OX345636.1	18800000	8.55667	0.000999001
OX345636.1	18900000	8.31333	0.000999001
OX345636.1	19000000	10.99	0.000999001
OX345636.1	19100000	10.5933	0.000999001
OX345636.1	19200000	15.0667	0.000999001
OX345636.1	19300000	9.36333	0.000999001
OX345636.1	19400000	7.01333	0.000999001
OX345636.1	19500000	8.53	0.000999001
OX345636.1	19600000	8.35	0.000999001
OX345636.1	19700000	9.71333	0.000999001
OX345636.1	19800000	5.51	0.000999001
OX345636.1	19900000	8.37333	0.000999001
OX345636.1	20000000	10.5067	0.000999001
OX345636.1	20100000	8.92667	0.000999001
OX345636.1	20200000	10.2967	0.000999001
OX345636.1	20300000	9.62667	0.000999001
OX345636.1	20400000	12.41	0.000999001
OX345636.1	20500000	9.21	0.000999001
OX345636.1	20600000	11.7	0.000999001
OX345636.1	20700000	8.02	0.000999001
OX345636.1	20800000	3.46333	0.000999001
OX345636.1	20900000	3.18	0.000999001
OX345636.1	21000000	2.18667	0.000999001
OX345636.1	21100000	7.14333	0.000999001
OX345636.1	21200000	12.95	0.000999001
OX345636.1	21300000	5.17	0.000999001
OX345636.1	21400000	6.32333	0.000999001
OX345636.1	21500000	2.52667	0.0519481
OX345636.1	21600000	4.30333	0.000999001
OX345636.1	21700000	9.40667	0.000999001
OX345636.1	21800000	9.63	0.000999001
OX345636.1	21900000	5.64667	0.000999001
OX345636.1	22000000	5.19667	0.000999001
OX345636.1	22100000	9.30333	0.000999001
OX345636.1	22200000	5.42	0.000999001
OX345636.1	22300000	10.98	0.000999001
OX345636.1	22400000	4.47667	0.000999001
OX345636.1	22500000	5.97667	0.000999001
OX345636.1	22600000	9.93667	0.0519481
OX345636.1	22700000	11.63	0.000999001
OX345636.1	22800000	6.93667	0.000999001
OX345636.1	22900000	9.06333	0.000999001
OX345636.1	23000000	13.41	0.000999001
OX345636.1	23100000	12.74	0.000999001
OX345636.1	23200000	7.72	0.000999001
OX345636.1	23300000	11.0467	0.000999001
OX345636.1	23400000	8.19667	0.000999001
OX345636.1	23500000	6.16	0.000999001
OX345636.1	23600000	10.8333	0.000999001
OX345636.1	23700000	9.80667	0.000999001
OX345636.1	23800000	8.05333	0.000999001
OX345636.1	23900000	5.52333	0.000999001
OX345636.1	24000000	4.18333	0.000999001
OX345636.1	24100000	2.14333	0.000999001
OX345636.1	24200000	3.94667	0.000999001
OX345636.1	24300000	4.21667	0.000999001
OX345636.1	24400000	3.09	0.000999001
OX345636.1	24500000	5.52	0.000999001
OX345636.1	24600000	3.58667	0.000999001
OX345636.1	24700000	2.31	0.0519481
OX345636.1	24800000	6.28	0.000999001
OX345636.1	24900000	7.35333	0.000999001
OX345636.1	25000000	7.42	0.000999001
OX345636.1	25100000	6.19	0.000999001
OX345636.1	25200000	6.35667	0.000999001
OX345636.1	25300000	7.70667	0.000999001
OX345636.1	25400000	10.44	0.000999001
OX345636.1	25500000	10.5367	0.000999001
OX345636.1	25600000	9.27	0.000999001
OX345636.1	25700000	5.45667	0.000999001
OX345636.1	25800000	3.36333	0.000999001
OX345636.1	25900000	1.73	0.0519481
OX345636.1	26000000	2.35667	0.000999001
OX345636.1	26100000	4.65667	0.000999001
OX345636.1	26200000	4.4	0.000999001
OX345636.1	26300000	5.03667	0.000999001
OX345636.1	26400000	6.06667	0.000999001
OX345636.1	26500000	12.2933	0.000999001
OX345636.1	26600000	6.57	0.000999001
OX345636.1	26700000	5.66	0.000999001
OX345636.1	26800000	2.23333	0.000999001
OX345636.1	26900000	3.34333	0.000999001
OX345636.1	27000000	4.45	0.000999001
OX345636.1	27100000	3.41	0.000999001
OX345636.1	27200000	2.02	0.000999001
OX345636.1	27300000	1.78	0.000999001
OX345636.1	27400000	8.08	0.000999001
OX345636.1	27500000	4.45	0.000999001
OX345636.1	27600000	9.76333	0.000999001
OX345636.1	27700000	9.76	0.000999001
OX345636.1	27800000	5.66	0.000999001
OX345636.1	27900000	9.43333	0.000999001
OX345636.1	28000000	7.71333	0.000999001
OX345636.1	28100000	8.13	0.000999001
OX345636.1	28200000	5.50667	0.000999001
OX345636.1	28300000	2.49	0.000999001
OX345636.1	28400000	3.87	0.000999001
OX345636.1	28500000	4.70333	0.000999001
OX345636.1	28600000	3.02667	0.000999001
OX345636.1	28700000	5.35667	0.000999001
OX345636.1	28800000	4.36	0.000999001
OX345636.1	28900000	2.93333	0.000999001
OX345636.1	29000000	3.31667	0.000999001
OX345636.1	29100000	3.76333	0.000999001
OX345636.1	29200000	3.98667	0.000999001
OX345636.1	29300000	2.19333	0.000999001
OX345636.1	29400000	3.63	0.000999001
OX345636.1	29500000	2.74	0.000999001
OX345636.1	29600000	4.09667	0.000999001
OX345636.1	29700000	6.32333	0.000999001
OX345636.1	29800000	8.32333	0.000999001
OX345636.1	29900000	4.54667	0.000999001
OX345636.1	30000000	8.15667	0.000999001
OX345636.1	30100000	9.17	0.000999001
OX345636.1	30200000	8.62333	0.000999001
OX345636.1	30300000	4.59667	0.000999001
OX345636.1	30400000	3.79	0.000999001
OX345636.1	30500000	3.37667	0.000999001
OX345636.1	30600000	10.2533	0.000999001
OX345636.1	30700000	8.77667	0.000999001
OX345636.1	30800000	6.13333	0.000999001
OX345636.1	30900000	4.15333	0.000999001
OX345636.1	31000000	8.05	0.000999001
OX345636.1	31100000	6.49	0.000999001
OX345636.1	31200000	5.88333	0.000999001
OX345636.1	31300000	4.04333	0.000999001
OX345636.1	31400000	0.176667	0.043956
OX345636.1	31500000	4.79667	0.000999001
OX345636.1	31600000	0.24	0.000999001
OX345636.1	31700000	0.233333	0.000999001
OX345636.1	31800000	1.66667	0.000999001
OX345636.1	31900000	0.733333	0.0519481
OX345636.1	32000000	0.223333	0.000999001
OX345636.1	32100000	2.16667	0.0519481
OX345636.1	32200000	3.38333	0.000999001
OX345636.1	32300000	3.25667	0.000999001
OX345636.1	32400000	4.98333	0.000999001
OX345636.1	32500000	2.90333	0.000999001
OX345636.1	32600000	3.51667	0.000999001
OX345636.1	32700000	9.91667	0.000999001
OX345636.1	32800000	9.80667	0.000999001
OX345636.1	32900000	7.58667	0.000999001
OX345636.1	33000000	5.33333	0.000999001
OX345636.1	33100000	5.58333	0.000999001
OX345636.1	33200000	4.45667	0.000999001
OX345636.1	33300000	8.03333	0.000999001
OX345636.1	33400000	10.1833	0.000999001
OX345636.1	33500000	6.22333	0.000999001
OX345636.1	33600000	10.4033	0.000999001
OX345636.1	33700000	10.8467	0.000999001
OX345636.1	33800000	9.40333	0.000999001
OX345636.1	33900000	3.43	0.043956
OX345636.1	34000000	12.7533	0.000999001
OX345636.1	34100000	12.1433	0.000999001
OX345636.1	34200000	12.1767	0.000999001
OX345636.1	34300000	10.6533	0.000999001
OX345636.1	34400000	10.0533	0.000999001
OX345636.1	34500000	12.8233	0.000999001
OX345636.1	34600000	9.28667	0.000999001
OX345636.1	34700000	9.66667	0.000999001
OX345636.1	34800000	8.15667	0.000999001
OX345636.1	34900000	13.0333	0.000999001
OX345636.1	35000000	12.89	0.000999001
OX345636.1	35100000	10.0867	0.000999001
OX345636.1	35200000	11.6067	0.000999001
OX345636.1	35300000	8.34667	0.000999001
OX345636.1	35400000	5.00333	0.000999001
OX345636.1	35500000	2.44	0.000999001
OX345636.1	35600000	3.91667	0.000999001
OX345636.1	35700000	6.42	0.000999001
OX345636.1	35800000	8.23	0.000999001
OX345636.1	35900000	16.0333	0.000999001
OX345636.1	36000000	11.8133	0.000999001
OX345636.1	36100000	12.37	0.000999001
OX345636.1	36200000	13.1067	0.000999001
OX345636.1	36300000	11.1367	0.000999001
OX345636.1	36400000	12.4333	0.000999001
OX345636.1	36500000	12.54	0.000999001
OX345636.1	36600000	10.4933	0.000999001
OX345636.1	36700000	5.08	0.0519481
OX345636.1	36800000	5.63333	0.000999001
OX345636.1	36900000	11.9833	0.000999001
OX345636.1	37000000	7.65333	0.000999001
OX345636.1	37100000	6.80667	0.000999001
OX345636.1	37200000	9.40667	0.000999001
OX345636.1	37300000	6.91667	0.000999001
OX345636.1	37400000	4.99667	0.000999001
OX345636.1	37500000	8	0.000999001
OX345636.1	37600000	12.2367	0.000999001
OX345636.1	37700000	7.83333	0.000999001
OX345636.1	37800000	11.0733	0.000999001
OX345636.1	37900000	4.71	0.000999001
OX345636.1	38000000	11.39	0.000999001
OX345636.1	38100000	9.54	0.000999001
OX345636.1	38200000	11.2	0.000999001
OX345636.1	38300000	6.54	0.000999001
OX345636.1	38400000	9.30667	0.000999001
OX345636.1	38500000	7.22333	0.000999001
OX345636.1	38600000	7.07	0.000999001
OX345636.1	38700000	4.14333	0.000999001
OX345636.1	38800000	8.89667	0.000999001
OX345636.1	38900000	12.8967	0.000999001
OX345636.1	39000000	11.2867	0.000999001
OX345636.1	39100000	13.4	0.000999001
OX345636.1	39200000	11.23	0.000999001
OX345636.1	39300000	12.4667	0.000999001
OX345636.1	39400000	11.64	0.000999001
OX345636.1	39500000	10.03	0.000999001
OX345636.1	39600000	7.74333	0.000999001
OX345636.1	39700000	11.3	0.000999001
OX345636.1	39800000	6.72667	0.000999001
OX345636.1	39900000	3.98333	0.000999001
OX345636.1	40000000	4.65333	0.000999001
OX345636.1	40100000	7.99333	0.000999001
OX345636.1	40200000	11.9633	0.000999001
OX345636.1	40300000	8.72667	0.000999001
OX345636.1	40400000	8.99333	0.000999001
OX345636.1	40500000	10.94	0.000999001
OX345636.1	40600000	11.3067	0.000999001
OX345636.1	40700000	8.47	0.000999001
OX345636.1	40800000	7.33333	0.000999001
OX345636.1	40900000	1.64	0.000999001
OX345636.1	41000000	1.4	0.000999001
OX345636.1	41100000	4.48333	0.000999001
OX345636.1	41200000	9.22333	0.000999001
OX345636.1	41300000	10	0.000999001
OX345636.1	41400000	9.17667	0.000999001
OX345636.1	41500000	6.95	0.000999001
OX345636.1	41600000	7.42667	0.000999001
OX345636.1	41700000	8.95333	0.000999001
OX345636.1	41800000	5.65	0.000999001
OX345636.1	41900000	10.2233	0.000999001
OX345636.1	42000000	6.66	0.000999001
OX345636.1	42100000	9.76333	0.000999001
OX345636.1	42200000	9.99667	0.000999001
OX345636.1	42300000	5.39333	0.000999001
OX345636.1	42400000	10.79	0.000999001
OX345636.1	42500000	7.85	0.000999001
OX345636.1	42600000	3.92667	0.000999001
OX345636.1	42700000	8.86333	0.000999001
OX345636.1	42800000	3.06	0.000999001
OX345636.1	42900000	4.26667	0.000999001
OX345636.1	43000000	6.84667	0.000999001
OX345636.1	43100000	11.2167	0.000999001
OX345636.1	43200000	6.95	0.000999001
OX345636.1	43300000	6.95	0.000999001
OX345636.1	43400000	11.72	0.000999001
OX345636.1	43500000	10.88	0.000999001
OX345636.1	43600000	11.84	0.000999001
OX345636.1	43700000	8.27333	0.000999001
OX345636.1	43800000	7.53667	0.000999001
OX345636.1	43900000	3.81	0.000999001
OX345636.1	44000000	8.02333	0.000999001
OX345636.1	44100000	6.73333	0.043956
OX345636.1	44200000	4.52333	0.000999001
OX345636.1	44300000	3.84667	0.000999001
OX345636.1	44400000	5.56667	0.000999001
OX345636.1	44500000	4.26	0.000999001
OX345636.1	44600000	7.65	0.000999001
OX345636.1	44700000	2.91	0.000999001
OX345636.1	44800000	4.77	0.000999001
OX345636.1	44900000	4.87	0.000999001
OX345636.1	45000000	1.59	0.000999001
OX345636.1	45100000	4.91333	0.000999001
OX345636.1	45200000	6.66	0.000999001
OX345636.1	45300000	8.94333	0.000999001
OX345636.1	45400000	11.0967	0.000999001
OX345636.1	45500000	8.32	0.000999001
OX345636.1	45600000	8.68	0.000999001
OX345636.1	45700000	8.62333	0.000999001
OX345636.1	45800000	7.58667	0.000999001
OX345636.1	45900000	7.29	0.000999001
OX345636.1	46000000	10.5133	0.000999001
OX345636.1	46100000	10.2967	0.000999001
OX345636.1	46200000	9.28333	0.000999001
OX345636.1	46300000	7.92667	0.000999001
OX345636.1	46400000	1.68667	0.000999001
OX345636.1	46500000	5.55	0.000999001
OX345636.1	46600000	4.34667	0.000999001
OX345636.1	46700000	3.88	0.000999001
OX345636.1	46800000	7.79667	0.000999001
OX345636.1	46900000	5.27	0.000999001
OX345636.1	47000000	10.1733	0.000999001
OX345636.1	47100000	6.56333	0.000999001
OX345636.1	47200000	7.37667	0.000999001
OX345636.1	47300000	8.77	0.000999001
OX345636.1	47400000	8.77	0.000999001
OX345636.1	47500000	5.10333	0.000999001
OX345636.1	47600000	5.07	0.000999001
OX345636.1	47700000	8.60333	0.000999001
OX345636.1	47800000	11.2067	0.000999001
OX345636.1	47900000	8.21667	0.000999001
OX345636.1	48000000	8.90333	0.000999001
OX345636.1	48100000	6.99	0.000999001
OX345636.1	48200000	8.69667	0.000999001
OX345636.1	48300000	9.32667	0.000999001
OX345636.1	48400000	10.6033	0.000999001
OX345636.1	48500000	6.39667	0.000999001
OX345636.1	48600000	10.9133	0.000999001
OX345636.1	48700000	2.05	0.0519481
OX345636.1	48800000	1.02667	0.000999001
OX345636.1	48900000	1.89333	0.000999001
OX345636.1	49000000	1.55333	0.000999001
OX345636.1	49100000	0.97	0.000999001
OX345636.1	49200000	2.15667	0.000999001
OX345636.1	49300000	0.67	0.000999001
OX345636.1	49400000	0.753333	0.000999001
OX345636.1	49500000	0.953333	0.000999001
OX345636.1	49600000	1.31333	0.000999001
OX345636.1	49700000	0.813333	0.000999001
OX345636.1	49800000	1.31333	0.000999001
OX345636.1	49900000	1.5	0.000999001
OX345636.1	50000000	1.23	0.000999001
OX345636.1	50100000	0.78	0.000999001
OX345636.1	50200000	1.47333	0.000999001
OX345636.1	50300000	1.55333	0.000999001
OX345636.1	50400000	1.68333	0.000999001
OX345636.1	50500000	6.98	0.000999001
OX345636.1	50600000	5.37667	0.000999001
OX345636.1	50700000	9.32	0.000999001
OX345636.1	50800000	9.35	0.000999001
OX345636.1	50900000	5.51667	0.000999001
OX345636.1	51000000	2.74	0.000999001
OX345636.1	51100000	1.29333	0.0519481
OX345636.1	51200000	2.78333	0.000999001
OX345636.1	51300000	2.10333	0.0519481
OX345636.1	51400000	2.09667	0.0519481
OX345636.1	51500000	3.16667	0.0519481
OX345636.1	51600000	2.67333	0.0519481
OX345636.1	51700000	1.31333	0.000999001
OX345636.1	51800000	6.22667	0.000999001
OX345636.1	51900000	8.74	0.000999001
OX345636.1	52000000	6.22	0.000999001
OX345636.1	52100000	9.42333	0.000999001
OX345636.1	52200000	8.95333	0.000999001
OX345636.1	52300000	12.0433	0.000999001
OX345636.1	52400000	6.23333	0.000999001
OX345636.1	52500000	1.92667	0.0519481
OX345636.1	52600000	2.47333	0.000999001
OX345636.1	52700000	2.95333	0.0519481
OX345636.1	52800000	6.35	0.000999001
OX345636.1	52900000	11.0033	0.000999001
OX345636.1	53000000	8.45333	0.000999001
OX345636.1	53100000	10.44	0.000999001
OX345636.1	53200000	8.31333	0.000999001
OX345636.1	53300000	6.37333	0.000999001
OX345636.1	53400000	10.9567	0.000999001
OX345636.1	53500000	11.4067	0.000999001
OX345636.1	53600000	7.28667	0.000999001
OX345636.1	53700000	3.51	0.000999001
OX345636.1	53800000	4.01	0.000999001
OX345636.1	53900000	3.37	0.000999001
OX345636.1	54000000	3.87667	0.000999001
OX345636.1	54100000	1.68333	0.000999001
OX345636.1	54200000	5.97667	0.000999001
OX345636.1	54300000	6.13333	0.000999001
OX345636.1	54400000	3.02333	0.000999001
OX345636.1	54500000	2.94333	0.000999001
OX345636.1	54600000	2.94667	0.000999001
OX345636.1	54700000	4.46667	0.000999001
OX345636.1	54800000	11.78	0.000999001
OX345636.1	54900000	14.8933	0.000999001
OX345636.1	55000000	11.66	0.000999001
OX345636.1	55100000	7.92667	0.000999001
OX345636.1	55200000	8.47333	0.000999001
OX345636.1	55300000	7.33667	0.000999001
OX345636.1	55400000	4.65667	0.000999001
OX345636.1	55500000	4.21	0.000999001
OX345636.1	55600000	3.79333	0.000999001
OX345636.1	55700000	3.29333	0.000999001
OX345636.1	55800000	2.09333	0.000999001
OX345636.1	55900000	3.43333	0.000999001
OX345636.1	56000000	5.74333	0.000999001
OX345636.1	56100000	4.19	0.000999001
OX345636.1	56200000	1.81333	0.000999001
OX345636.1	56300000	1.15333	0.000999001
OX345636.1	56400000	1.28	0.000999001
OX345636.1	56500000	0.116667	0.396603
OX345636.1	56600000	1.10667	0.000999001
OX345636.1	56700000	0.423333	0.000999001
OX345636.1	56800000	0.776667	0.000999001
OX345636.1	56900000	1.12	0.000999001
OX345636.1	57000000	5.74667	0.000999001
OX345636.1	57100000	3.77667	0.000999001
OX345636.1	57200000	1.05333	0.000999001
OX345636.1	57300000	0.966667	0.000999001
OX345636.1	57400000	0.316667	0.000999001
OX345636.1	57500000	0.543333	0.000999001
OX345636.1	57600000	1.32667	0.000999001
OX345636.1	57700000	1.76	0.000999001
OX345636.1	57800000	1.45667	0.000999001
OX345636.1	57900000	1.03667	0.000999001
OX345636.1	58000000	3.09333	0.000999001
OX345636.1	58100000	2.23333	0.000999001
OX345636.1	58200000	2.27333	0.000999001
OX345636.1	58300000	3.27	0.000999001
OX345636.1	58400000	2.32	0.000999001
OX345636.1	58500000	1.53333	0.000999001
OX345636.1	58600000	1.07	0.101898
OX345636.1	58700000	0.82	0.000999001
OX345636.1	58800000	1.05333	0.000999001
OX345636.1	58900000	1.18333	0.000999001
OX345636.1	59000000	0.966667	0.000999001
OX345636.1	59100000	1.13333	0.000999001
OX345636.1	59200000	1.80333	0.000999001
OX345636.1	59300000	2.5	0.000999001
OX345636.1	59400000	0.496667	0.000999001
OX345636.1	59500000	0.88	0.0519481
OX345636.1	59600000	1.07333	0.000999001
OX345636.1	59700000	0.46	0.144855
OX345636.1	59800000	1.22	0.000999001
OX345636.1	59900000	0.666667	0.000999001
OX345636.1	60000000	1.3	0.0519481
OX345636.1	60100000	0.593333	0.000999001
OX345636.1	60200000	1.48333	0.000999001
OX345636.1	60300000	1.51	0.000999001
OX345636.1	60400000	1.42	0.000999001
OX345636.1	60500000	0.83	0.000999001
OX345636.1	60600000	0.603333	0.0519481
OX345636.1	60700000	1.95333	0.000999001
OX345636.1	60800000	0.846667	0.000999001
OX345636.1	60900000	0.496667	0.000999001
OX345636.1	61000000	0.786667	0.000999001
OX345636.1	61100000	2.18333	0.000999001
OX345636.1	61200000	1.48333	0.000999001
OX345636.1	61300000	1.09	0.000999001
OX345636.1	61400000	1.04333	0.000999001
OX345636.1	61500000	0.9	0.000999001
OX345636.1	61600000	1.30667	0.000999001
OX345636.1	61700000	1.08	0.000999001
OX345636.1	61800000	1.26667	0.000999001
OX345636.1	61900000	5.15667	0.000999001
OX345636.1	62000000	11.82	0.000999001
OX345636.1	62100000	12.69	0.000999001
OX345636.1	62200000	15.0233	0.000999001
OX345636.1	62300000	2.72667	0.000999001
OX345636.1	62400000	2.87333	0.000999001
OX345636.1	62500000	1.04333	0.0519481
OX345636.1	62600000	1.88667	0.000999001
OX345636.1	62700000	3.57	0.000999001
OX345636.1	62800000	5.33667	0.000999001
OX345636.1	62900000	0.786667	0.000999001
OX345636.1	63000000	2.49667	0.000999001
OX345636.1	63100000	1.39333	0.000999001
OX345636.1	63200000	3.22667	0.000999001
OX345637.1	0	2.2	0.000999001
OX345637.1	100000	10.0233	0.000999001
OX345637.1	200000	13.35	0.000999001
OX345637.1	300000	9.43667	0.000999001
OX345637.1	400000	12.1467	0.000999001
OX345637.1	500000	15.05	0.000999001
OX345637.1	600000	5.34	0.000999001
OX345637.1	700000	13.01	0.000999001
OX345637.1	800000	10.1467	0.000999001
OX345637.1	900000	4.92	0.000999001
OX345637.1	1000000	4.74	0.0949051
OX345637.1	1100000	9.07	0.000999001
OX345637.1	1200000	10.4033	0.000999001
OX345637.1	1300000	9.78	0.000999001
OX345637.1	1400000	12.88	0.000999001
OX345637.1	1500000	7.54333	0.0519481
OX345637.1	1600000	4.4	0.000999001
OX345637.1	1700000	4.52333	0.0519481
OX345637.1	1800000	11.64	0.000999001
OX345637.1	1900000	9.49333	0.000999001
OX345637.1	2000000	10.6433	0.000999001
OX345637.1	2100000	13.2767	0.000999001
OX345637.1	2200000	12.5233	0.000999001
OX345637.1	2300000	10.8067	0.000999001
OX345637.1	2400000	3.82667	0.040959
OX345637.1	2500000	2.98333	0.000999001
OX345637.1	2600000	2.93667	0.000999001
OX345637.1	2700000	2.48667	0.000999001
OX345637.1	2800000	3.10333	0.000999001
OX345637.1	2900000	4.09333	0.000999001
OX345637.1	3000000	6.66	0.000999001
OX345637.1	3100000	0.933333	0.000999001
OX345637.1	3200000	0.38	0.000999001
OX345637.1	3300000	0.796667	0.000999001
OX345637.1	3400000	6.75	0.000999001
OX345637.1	3500000	6.35333	0.000999001
OX345637.1	3600000	9.86333	0.000999001
OX345637.1	3700000	4.69667	0.000999001
OX345637.1	3800000	3.02333	0.000999001
OX345637.1	3900000	8	0.000999001
OX345637.1	4000000	7.84333	0.000999001
OX345637.1	4100000	14.1333	0.000999001
OX345637.1	4200000	11.0567	0.000999001
OX345637.1	4300000	7.85667	0.000999001
OX345637.1	4400000	9.57667	0.000999001
OX345637.1	4500000	8.69	0.000999001
OX345637.1	4600000	3.46	0.000999001
OX345637.1	4700000	4.52667	0.000999001
OX345637.1	4800000	10.4033	0.000999001
OX345637.1	4900000	13.5533	0.000999001
OX345637.1	5000000	9.55	0.000999001
OX345637.1	5100000	12.0067	0.000999001
OX345637.1	5200000	12.97	0.000999001
OX345637.1	5300000	2.63333	0.000999001
OX345637.1	5400000	6.57	0.000999001
OX345637.1	5500000	13.7467	0.000999001
OX345637.1	5600000	12.3367	0.000999001
OX345637.1	5700000	9.34333	0.000999001
OX345637.1	5800000	8.47	0.000999001
OX345637.1	5900000	5.05	0.000999001
OX345637.1	6000000	5.74333	0.000999001
OX345637.1	6100000	1.75	0.000999001
OX345637.1	6200000	2.39	0.000999001
OX345637.1	6300000	5.54667	0.000999001
OX345637.1	6400000	7.86333	0.000999001
OX345637.1	6500000	8.97	0.000999001
OX345637.1	6600000	8.36667	0.000999001
OX345637.1	6700000	10.86	0.000999001
OX345637.1	6800000	9.69333	0.000999001
OX345637.1	6900000	10.58	0.000999001
OX345637.1	7000000	11.7933	0.000999001
OX345637.1	7100000	10.72	0.000999001
OX345637.1	7200000	9.92667	0.000999001
OX345637.1	7300000	7.6	0.000999001
OX345637.1	7400000	10.3433	0.000999001
OX345637.1	7500000	10.8267	0.000999001
OX345637.1	7600000	5.44	0.000999001
OX345637.1	7700000	10.4167	0.000999001
OX345637.1	7800000	10.7033	0.000999001
OX345637.1	7900000	9.45667	0.000999001
OX345637.1	8000000	9.73333	0.000999001
OX345637.1	8100000	8.84333	0.000999001
OX345637.1	8200000	11.4667	0.000999001
OX345637.1	8300000	10.0533	0.000999001
OX345637.1	8400000	11.39	0.000999001
OX345637.1	8500000	9.25	0.000999001
OX345637.1	8600000	10.1767	0.000999001
OX345637.1	8700000	2.06667	0.000999001
OX345637.1	8800000	4.44	0.000999001
OX345637.1	8900000	5.66333	0.000999001
OX345637.1	9000000	4.59333	0.000999001
OX345637.1	9100000	5.51667	0.000999001
OX345637.1	9200000	5.04333	0.000999001
OX345637.1	9300000	5.98333	0.000999001
OX345637.1	9400000	1.85333	0.000999001
OX345637.1	9500000	3.84333	0.000999001
OX345637.1	9600000	1.99	0.000999001
OX345637.1	9700000	4.36333	0.000999001
OX345637.1	9800000	12.2467	0.000999001
OX345637.1	9900000	11.27	0.000999001
OX345637.1	10000000	13.02	0.000999001
OX345637.1	10100000	10.4933	0.000999001
OX345637.1	10200000	7.12667	0.000999001
OX345637.1	10300000	9.64	0.000999001
OX345637.1	10400000	8.46	0.000999001
OX345637.1	10500000	6.08667	0.000999001
OX345637.1	10600000	3.40333	0.000999001
OX345637.1	10700000	2.16667	0.000999001
OX345637.1	10800000	4.73	0.000999001
OX345637.1	10900000	6.61667	0.000999001
OX345637.1	11000000	7.20333	0.000999001
OX345637.1	11100000	8.91333	0.000999001
OX345637.1	11200000	5.08333	0.000999001
OX345637.1	11300000	5.98667	0.000999001
OX345637.1	11400000	7.5	0.000999001
OX345637.1	11500000	3.45	0.000999001
OX345637.1	11600000	10.1433	0.000999001
OX345637.1	11700000	9.29667	0.000999001
OX345637.1	11800000	8.13	0.000999001
OX345637.1	11900000	8.20667	0.000999001
OX345637.1	12000000	10.57	0.000999001
OX345637.1	12100000	6.33	0.000999001
OX345637.1	12200000	11.9	0.000999001
OX345637.1	12300000	9.74	0.000999001
OX345637.1	12400000	8.19667	0.000999001
OX345637.1	12500000	8.01	0.000999001
OX345637.1	12600000	7.94	0.000999001
OX345637.1	12700000	11.2733	0.000999001
OX345637.1	12800000	6.16	0.000999001
OX345637.1	12900000	6.06	0.000999001
OX345637.1	13000000	5.97333	0.000999001
OX345637.1	13100000	6.71667	0.000999001
OX345637.1	13200000	7.66667	0.000999001
OX345637.1	13300000	10.7733	0.000999001
OX345637.1	13400000	6.48	0.000999001
OX345637.1	13500000	8.84667	0.000999001
OX345637.1	13600000	4.58	0.000999001
OX345637.1	13700000	7.11667	0.000999001
OX345637.1	13800000	9.12	0.000999001
OX345637.1	13900000	6.50667	0.000999001
OX345637.1	14000000	4.51	0.0519481
OX345637.1	14100000	6.14667	0.000999001
OX345637.1	14200000	4.48	0.0519481
OX345637.1	14300000	1.98	0.000999001
OX345637.1	14400000	5.95333	0.000999001
OX345637.1	14500000	5.49333	0.000999001
OX345637.1	14600000	5.83667	0.000999001
OX345637.1	14700000	6.46667	0.000999001
OX345637.1	14800000	8.29667	0.000999001
OX345637.1	14900000	9.83667	0.000999001
OX345637.1	15000000	4.37333	0.000999001
OX345637.1	15100000	7.21333	0.000999001
OX345637.1	15200000	13.3967	0.000999001
OX345637.1	15300000	8.67333	0.000999001
OX345637.1	15400000	8.71333	0.000999001
OX345637.1	15500000	11.41	0.000999001
OX345637.1	15600000	3.35	0.000999001
OX345637.1	15700000	2.77333	0.000999001
OX345637.1	15800000	8.79	0.000999001
OX345637.1	15900000	7.04	0.000999001
OX345638.1	0	5.14	0.000999001
OX345638.1	100000	8.73333	0.000999001
OX345638.1	200000	11.8933	0.000999001
OX345638.1	300000	10.8867	0.000999001
OX345638.1	400000	10.2633	0.000999001
OX345638.1	500000	7.83	0.000999001
OX345638.1	600000	9.26667	0.000999001
OX345638.1	700000	8.83333	0.000999001
OX345638.1	800000	10.4767	0.000999001
OX345638.1	900000	11.33	0.000999001
OX345638.1	1000000	13.9367	0.000999001
OX345638.1	1100000	6.15667	0.000999001
OX345638.1	1200000	7.78	0.000999001
OX345638.1	1300000	8.89333	0.000999001
OX345638.1	1400000	13.8067	0.000999001
OX345638.1	1500000	12.4567	0.000999001
OX345638.1	1600000	12.4	0.000999001
OX345638.1	1700000	8.52667	0.000999001
OX345638.1	1800000	1.98667	0.000999001
OX345638.1	1900000	2.32	0.000999001
OX345638.1	2000000	1.54667	0.000999001
OX345638.1	2100000	2.69333	0.000999001
OX345638.1	2200000	2.86333	0.000999001
OX345638.1	2300000	7.51	0.000999001
OX345638.1	2400000	10.29	0.000999001
OX345638.1	2500000	11.2567	0.000999001
OX345638.1	2600000	10.4667	0.000999001
OX345638.1	2700000	9.27333	0.000999001
OX345638.1	2800000	9.08667	0.000999001
OX345638.1	2900000	10.4033	0.000999001
OX345638.1	3000000	11.6533	0.000999001
OX345638.1	3100000	11.36	0.000999001
OX345638.1	3200000	5.50333	0.000999001
OX345638.1	3300000	0.81	0.0519481
OX345638.1	3400000	1.15667	0.000999001
OX345638.1	3500000	6.44667	0.000999001
OX345638.1	3600000	11.3333	0.000999001
OX345638.1	3700000	10.9567	0.000999001
OX345638.1	3800000	7.46333	0.000999001
OX345638.1	3900000	9.59333	0.000999001
OX345638.1	4000000	8.20667	0.000999001
OX345638.1	4100000	6.16	0.000999001
OX345638.1	4200000	4.34	0.000999001
OX345638.1	4300000	2.38667	0.000999001
OX345638.1	4400000	2.97667	0.0519481
OX345638.1	4500000	3.49333	0.000999001
OX345638.1	4600000	2.59667	0.000999001
OX345638.1	4700000	7.01	0.000999001
OX345638.1	4800000	7.23667	0.000999001
OX345638.1	4900000	6.85333	0.000999001
OX345638.1	5000000	8.61333	0.000999001
OX345638.1	5100000	13.2933	0.000999001
OX345638.1	5200000	11.6767	0.000999001
OX345638.1	5300000	9.58	0.000999001
OX345638.1	5400000	3.12	0.0519481
OX345638.1	5500000	4.85333	0.0519481
OX345638.1	5600000	13.96	0.000999001
OX345638.1	5700000	13.72	0.000999001
OX345638.1	5800000	4.60667	0.000999001
OX345638.1	5900000	5.14	0.000999001
OX345638.1	6000000	2.21667	0.000999001
OX345638.1	6100000	1.37667	0.000999001
OX345638.1	6200000	1.26	0.000999001
OX345638.1	6300000	2.84	0.000999001
OX345638.1	6400000	3.47333	0.000999001
OX345638.1	6500000	1.67667	0.000999001
OX345638.1	6600000	1.43	0.000999001
OX345638.1	6700000	2.67333	0.000999001
OX345638.1	6800000	1.65667	0.0509491
OX345638.1	6900000	2.93667	0.000999001
OX345638.1	7000000	3.42333	0.000999001
OX345638.1	7100000	9.28	0.000999001
OX345638.1	7200000	11.27	0.000999001
OX345638.1	7300000	14.31	0.000999001
OX345638.1	7400000	5.07	0.000999001
OX345638.1	7500000	3.17333	0.000999001
OX345638.1	7600000	7.97667	0.000999001
OX345638.1	7700000	6.41	0.000999001
OX345638.1	7800000	5.66	0.000999001
OX345638.1	7900000	2.07	0.000999001
OX345638.1	8000000	5	0.000999001
OX345638.1	8100000	3.79333	0.000999001
OX345638.1	8200000	7.82333	0.000999001
OX345638.1	8300000	6.49333	0.000999001
OX345638.1	8400000	9.00333	0.000999001
OX345638.1	8500000	9.25667	0.000999001
OX345638.1	8600000	1.80333	0.101898
OX345638.1	8700000	6.79	0.000999001
OX345638.1	8800000	10.3133	0.000999001
OX345638.1	8900000	2.22333	0.000999001
OX345638.1	9000000	1.51333	0.0949051
OX345638.1	9100000	2.63667	0.000999001
OX345638.1	9200000	2.00667	0.000999001
OX345638.1	9300000	2.58667	0.000999001
OX345638.1	9400000	0.543333	0.000999001
OX345638.1	9500000	1.25333	0.000999001
OX345638.1	9600000	2.18667	0.000999001
OX345638.1	9700000	3.94667	0.000999001
OX345638.1	9800000	2.29	0.000999001
OX345638.1	9900000	1.14	0.000999001
OX345638.1	10000000	3.04667	0.000999001
OX345638.1	10100000	1.04667	0.144855
OX345638.1	10200000	5.55	0.000999001
OX345638.1	10300000	2.11333	0.000999001
OX345638.1	10400000	0.826667	0.000999001
OX345638.1	10500000	1.81667	0.0519481
OX345638.1	10600000	3.50333	0.000999001
OX345638.1	10700000	2.84667	0.000999001
OX345638.1	10800000	1.47667	0.000999001
OX345638.1	10900000	1.07333	0.0519481
OX345638.1	11000000	4.37	0.000999001
OX345638.1	11100000	9.12333	0.000999001
OX345638.1	11200000	12.7867	0.000999001
OX345638.1	11300000	8.01667	0.000999001
OX345638.1	11400000	0.196667	0.000999001
OX345639.1	0	3.36667	0.000999001
OX345639.1	100000	7.41	0.000999001
OX345639.1	200000	7.97333	0.000999001
OX345639.1	300000	8.34667	0.000999001
OX345639.1	400000	8.71	0.000999001
OX345639.1	500000	8.37333	0.000999001
OX345639.1	600000	9.76667	0.000999001
OX345639.1	700000	8.96667	0.000999001
OX345639.1	800000	10.1267	0.000999001
OX345639.1	900000	9.63	0.000999001
OX345639.1	1000000	8.8	0.000999001
OX345639.1	1100000	10.8867	0.000999001
OX345639.1	1200000	7.66667	0.000999001
OX345639.1	1300000	10.3267	0.000999001
OX345639.1	1400000	4.79667	0.000999001
OX345639.1	1500000	9.15	0.000999001
OX345639.1	1600000	8.78	0.000999001
OX345639.1	1700000	10.55	0.000999001
OX345639.1	1800000	7.31	0.000999001
OX345639.1	1900000	9.29	0.000999001
OX345639.1	2000000	11.3833	0.000999001
OX345639.1	2100000	9.96	0.000999001
OX345639.1	2200000	8.68333	0.000999001
OX345639.1	2300000	11.0467	0.000999001
OX345639.1	2400000	12.1267	0.000999001
OX345639.1	2500000	11.4633	0.000999001
OX345639.1	2600000	8.5	0.000999001
OX345639.1	2700000	7.27667	0.000999001
OX345639.1	2800000	10.26	0.000999001
OX345639.1	2900000	12.1	0.000999001
OX345639.1	3000000	9.49667	0.000999001
OX345639.1	3100000	7.98	0.000999001
OX345639.1	3200000	7.61333	0.000999001
OX345639.1	3300000	8.06	0.000999001
OX345639.1	3400000	9.01	0.000999001
OX345639.1	3500000	7.67667	0.000999001
OX345639.1	3600000	9.29	0.000999001
OX345639.1	3700000	6.99667	0.000999001
OX345639.1	3800000	8.1	0.000999001
OX345639.1	3900000	7.23667	0.000999001
OX345639.1	4000000	6.1	0.000999001
OX345639.1	4100000	5.81667	0.000999001
OX345639.1	4200000	6.02333	0.000999001
OX345639.1	4300000	7.65	0.000999001
OX345639.1	4400000	7.93	0.000999001
OX345639.1	4500000	8.49	0.000999001
OX345639.1	4600000	9.37667	0.000999001
OX345639.1	4700000	8.97333	0.000999001
OX345639.1	4800000	8.16667	0.000999001
OX345639.1	4900000	8.98333	0.000999001
OX345639.1	5000000	9.84333	0.000999001
OX345639.1	5100000	11.62	0.000999001
OX345639.1	5200000	9.72333	0.000999001
OX345639.1	5300000	10.3567	0.000999001
OX345639.1	5400000	8.84	0.000999001
OX345639.1	5500000	9.54333	0.000999001
OX345639.1	5600000	9.85	0.000999001
OX345639.1	5700000	9.52	0.000999001
OX345639.1	5800000	9.34	0.000999001
OX345639.1	5900000	7.22	0.000999001
OX345639.1	6000000	10.4667	0.000999001
OX345639.1	6100000	9.35	0.000999001
OX345639.1	6200000	10.3267	0.000999001
OX345639.1	6300000	5.88333	0.000999001
OX345639.1	6400000	11.6933	0.000999001
OX345639.1	6500000	6.77	0.000999001
OX345639.1	6600000	7.58333	0.000999001
OX345639.1	6700000	10.81	0.000999001
OX345639.1	6800000	11.65	0.000999001
OX345639.1	6900000	10.51	0.000999001
OX345639.1	7000000	10.92	0.000999001
OX345639.1	7100000	11.4567	0.000999001
OX345639.1	7200000	9.52333	0.000999001
OX345639.1	7300000	10.1867	0.000999001
OX345639.1	7400000	8.44333	0.000999001
OX345639.1	7500000	9.88333	0.000999001
OX345639.1	7600000	6.62333	0.000999001
OX345639.1	7700000	0.176667	0.0519481
OX345639.1	7800000	0.346667	0.000999001
OX345639.1	7900000	2.60333	0.000999001
OX345639.1	8000000	7.47333	0.000999001
OX345639.1	8100000	9.67667	0.000999001
OX345639.1	8200000	11.33	0.000999001
OX345639.1	8300000	11.05	0.000999001
OX345639.1	8400000	11.2733	0.000999001
OX345639.1	8500000	9.94667	0.000999001
OX345639.1	8600000	9.25667	0.000999001
OX345639.1	8700000	9.46333	0.000999001
OX345639.1	8800000	10.5633	0.000999001
OX345639.1	8900000	14.0233	0.000999001
OX345639.1	9000000	8.84	0.000999001
OX345639.1	9100000	10.77	0.000999001
OX345639.1	9200000	9.65333	0.000999001
OX345639.1	9300000	10.5033	0.000999001
OX345639.1	9400000	10.4933	0.000999001
OX345639.1	9500000	8.86667	0.000999001
OX345639.1	9600000	7.83667	0.000999001
OX345639.1	9700000	7.70333	0.000999001
OX345639.1	9800000	5.98667	0.000999001
OX345639.1	9900000	2.62	0.000999001
OX345640.1	0	2.71667	0.000999001
OX345640.1	100000	8.07667	0.000999001
OX345640.1	200000	9.21333	0.000999001
OX345640.1	300000	9.34667	0.000999001
OX345640.1	400000	9.07333	0.000999001
OX345640.1	500000	9.21333	0.000999001
OX345640.1	600000	9.42333	0.000999001
OX345640.1	700000	11.83	0.000999001
OX345640.1	800000	9.23333	0.000999001
OX345640.1	900000	8.75	0.000999001
OX345640.1	1000000	7.26333	0.000999001
OX345640.1	1100000	9.17667	0.000999001
OX345640.1	1200000	8.09333	0.000999001
OX345640.1	1300000	9.6	0.000999001
OX345640.1	1400000	4.38	0.000999001
OX345640.1	1500000	3.94	0.000999001
OX345640.1	1600000	11.0867	0.000999001
OX345640.1	1700000	12.0833	0.000999001
OX345640.1	1800000	12.9667	0.000999001
OX345640.1	1900000	9.57667	0.000999001
OX345640.1	2000000	2.55333	0.000999001
OX345640.1	2100000	3.49667	0.000999001
OX345640.1	2200000	10.3867	0.000999001
OX345640.1	2300000	11.0133	0.000999001
OX345640.1	2400000	8.41333	0.000999001
OX345640.1	2500000	11.4467	0.000999001
OX345640.1	2600000	9.98333	0.000999001
OX345640.1	2700000	9.04	0.000999001
OX345640.1	2800000	11.9633	0.000999001
OX345640.1	2900000	11.69	0.000999001
OX345640.1	3000000	4.96	0.0549451
OX345640.1	3100000	9.79667	0.000999001
OX345640.1	3200000	9.77	0.000999001
OX345640.1	3300000	9.83333	0.000999001
OX345640.1	3400000	10.6433	0.000999001
OX345640.1	3500000	12.61	0.000999001
OX345640.1	3600000	11.06	0.000999001
OX345640.1	3700000	10.8133	0.000999001
OX345640.1	3800000	11.7367	0.000999001
OX345640.1	3900000	8.41667	0.000999001
OX345640.1	4000000	11.5767	0.000999001
OX345640.1	4100000	10.3533	0.000999001
OX345640.1	4200000	1.78667	0.000999001
OX345640.1	4300000	6.27333	0.000999001
OX345640.1	4400000	10.4367	0.000999001
OX345640.1	4500000	10.7867	0.000999001
OX345640.1	4600000	7.13667	0.000999001
OX345640.1	4700000	11.3667	0.000999001
OX345640.1	4800000	8.31	0.000999001
OX345640.1	4900000	11.9333	0.000999001
OX345640.1	5000000	10.97	0.000999001
OX345640.1	5100000	10.6033	0.000999001
OX345640.1	5200000	6.32333	0.000999001
OX345640.1	5300000	2.57333	0.000999001
OX345640.1	5400000	11.73	0.000999001
OX345640.1	5500000	4.93	0.000999001
OX345640.1	5600000	2.19333	0.000999001
OX345640.1	5700000	8.00333	0.000999001
OX345640.1	5800000	7.37333	0.000999001
OX345640.1	5900000	11.44	0.000999001
OX345640.1	6000000	13.28	0.000999001
OX345640.1	6100000	7.49667	0.000999001
OX345640.1	6200000	7.27667	0.000999001
OX345640.1	6300000	6.92333	0.000999001
OX345640.1	6400000	9.57	0.000999001
OX345640.1	6500000	1.24333	0.144855
OX345640.1	6600000	5.41	0.000999001
OX345640.1	6700000	2.65667	0.000999001
OX345640.1	6800000	3.43667	0.000999001
OX345640.1	6900000	3.21333	0.000999001
OX345640.1	7000000	3.18667	0.000999001
OX345640.1	7100000	4.62333	0.000999001
OX345640.1	7200000	8.85333	0.000999001
OX345640.1	7300000	13.3567	0.000999001
OX345640.1	7400000	10.93	0.000999001
OX345640.1	7500000	16.02	0.000999001
OX345640.1	7600000	15.8867	0.000999001
OX345640.1	7700000	14.78	0.000999001
OX345640.1	7800000	5.09333	0.000999001
OX345640.1	7900000	8.69333	0.000999001
OX345640.1	8000000	10.4033	0.000999001
OX345640.1	8100000	8.51	0.000999001
OX345640.1	8200000	5.37667	0.000999001
OX345640.1	8300000	14.0667	0.000999001
OX345640.1	8400000	11.8933	0.000999001
OX345640.1	8500000	0.41	0.000999001
OX345641.1	0	3.19333	0.000999001
OX345641.1	100000	8.43333	0.000999001
OX345641.1	200000	6.57	0.000999001
OX345641.1	300000	9.57667	0.000999001
OX345641.1	400000	13.4367	0.000999001
OX345641.1	500000	8.32333	0.000999001
OX345641.1	600000	12.32	0.000999001
OX345641.1	700000	7.50333	0.000999001
OX345641.1	800000	3.14333	0.000999001
OX345641.1	900000	6.7	0.000999001
OX345641.1	1000000	12.5033	0.000999001
OX345641.1	1100000	4.61333	0.000999001
OX345641.1	1200000	7.27	0.000999001
OX345641.1	1300000	7.50333	0.000999001
OX345641.1	1400000	5.60667	0.000999001
OX345641.1	1500000	7.00667	0.000999001
OX345641.1	1600000	9.92	0.000999001
OX345641.1	1700000	9.54	0.000999001
OX345641.1	1800000	12.2567	0.000999001
OX345641.1	1900000	9.34333	0.000999001
OX345641.1	2000000	10.82	0.000999001
OX345641.1	2100000	12.7133	0.000999001
OX345641.1	2200000	8.45667	0.000999001
OX345641.1	2300000	4.05333	0.000999001
OX345641.1	2400000	3.10333	0.000999001
OX345641.1	2500000	1.48667	0.000999001
OX345641.1	2600000	7.58333	0.000999001
OX345641.1	2700000	3.14667	0.000999001
OX345641.1	2800000	11.43	0.000999001
OX345641.1	2900000	8.03667	0.000999001
OX345641.1	3000000	13.23	0.000999001
OX345641.1	3100000	13.8867	0.000999001
OX345641.1	3200000	13.89	0.000999001
OX345641.1	3300000	4.89333	0.000999001
OX345641.1	3400000	5.47667	0.000999001
OX345641.1	3500000	3.54	0.000999001
OX345641.1	3600000	10.2	0.000999001
OX345641.1	3700000	10.96	0.000999001
OX345641.1	3800000	10.4033	0.000999001
OX345641.1	3900000	6.04	0.000999001
OX345641.1	4000000	5.45667	0.000999001
OX345641.1	4100000	6.91333	0.000999001
OX345641.1	4200000	10.0567	0.000999001
OX345641.1	4300000	8.39	0.000999001
OX345641.1	4400000	9.13	0.000999001
OX345641.1	4500000	10.51	0.000999001
OX345641.1	4600000	10.9	0.000999001
OX345641.1	4700000	11.7633	0.000999001
OX345641.1	4800000	11.2467	0.000999001
OX345641.1	4900000	6.18667	0.000999001
OX345641.1	5000000	2.10333	0.043956
OX345641.1	5100000	0.5	0.0919081
OX345641.1	5200000	0.743333	0.0519481
OX345641.1	5300000	11.5633	0.000999001
OX345641.1	5400000	4.03	0.000999001
OX345641.1	5500000	1.08	0.000999001
OX345641.1	5600000	1.31667	0.000999001
OX345641.1	5700000	0.966667	0.0519481
OX345641.1	5800000	2.03333	0.000999001
OX345641.1	5900000	3.34333	0.000999001
OX345641.1	6000000	2.37333	0.000999001
OX345641.1	6100000	1.02667	0.0519481
OX345641.1	6200000	1.42	0.000999001
OX345641.1	6300000	3.77667	0.000999001
OX345641.1	6400000	7.48	0.000999001
OX345641.1	6500000	6.25333	0.000999001
OX345641.1	6600000	8.17667	0.000999001
OX345641.1	6700000	7.31667	0.000999001
OX345641.1	6800000	14.4067	0.000999001
OX345641.1	6900000	13.7067	0.000999001
OX345641.1	7000000	10.11	0.000999001
OX345641.1	7100000	10.84	0.000999001
OX345641.1	7200000	11.8267	0.000999001
OX345641.1	7300000	7.28667	0.000999001
OX345641.1	7400000	7	0.000999001
OX345641.1	7500000	12.62	0.000999001
OX345641.1	7600000	11.74	0.000999001
OX345641.1	7700000	11.7533	0.000999001
OX345641.1	7800000	10.3833	0.000999001
OX345641.1	7900000	9.74333	0.000999001
OX345641.1	8000000	8.47333	0.000999001
OX345641.1	8100000	0.356667	0.0859141
OX345642.1	0	4.15333	0.000999001
OX345642.1	100000	7.81333	0.000999001
OX345642.1	200000	10.15	0.000999001
OX345642.1	300000	10.5033	0.000999001
OX345642.1	400000	9.48333	0.000999001
OX345642.1	500000	10.5267	0.000999001
OX345642.1	600000	8.48667	0.000999001
OX345642.1	700000	9.47	0.000999001
OX345642.1	800000	9.01333	0.000999001
OX345642.1	900000	5.61333	0.0949051
OX345642.1	1000000	8.14	0.000999001
OX345642.1	1100000	9.22	0.000999001
OX345642.1	1200000	11.2433	0.000999001
OX345642.1	1300000	5.27	0.000999001
OX345642.1	1400000	7.81667	0.000999001
OX345642.1	1500000	11.2267	0.000999001
OX345642.1	1600000	7.57	0.000999001
OX345642.1	1700000	9.15667	0.000999001
OX345642.1	1800000	10.0967	0.000999001
OX345642.1	1900000	9.33	0.000999001
OX345642.1	2000000	10.83	0.000999001
OX345642.1	2100000	9.11333	0.000999001
OX345642.1	2200000	10.7833	0.000999001
OX345642.1	2300000	7.4	0.000999001
OX345642.1	2400000	10.41	0.000999001
OX345642.1	2500000	12.0833	0.000999001
OX345642.1	2600000	4.96333	0.000999001
OX345642.1	2700000	1.4	0.144855
OX345642.1	2800000	6.98	0.000999001
OX345642.1	2900000	10.6	0.000999001
OX345642.1	3000000	6.15667	0.000999001
OX345642.1	3100000	5.11333	0.0519481
OX345642.1	3200000	7.89333	0.000999001
OX345642.1	3300000	10.5133	0.000999001
OX345642.1	3400000	10.5933	0.000999001
OX345642.1	3500000	8.74	0.000999001
OX345642.1	3600000	10.8	0.000999001
OX345642.1	3700000	12.69	0.000999001
OX345642.1	3800000	6.34	0.000999001
OX345642.1	3900000	9.46333	0.000999001
OX345642.1	4000000	4.33333	0.000999001
OX345642.1	4100000	1.99667	0.000999001
OX345642.1	4200000	4.39667	0.000999001
OX345642.1	4300000	11.5833	0.000999001
OX345642.1	4400000	10.8767	0.000999001
OX345642.1	4500000	6.73667	0.000999001
OX345642.1	4600000	9.66333	0.000999001
OX345642.1	4700000	2.51	0.000999001
OX345642.1	4800000	0.526667	0.000999001
OX345642.1	4900000	7.54333	0.000999001
OX345642.1	5000000	11.16	0.000999001
OX345642.1	5100000	9.03	0.000999001
OX345642.1	5200000	11.1	0.000999001
OX345642.1	5300000	10.9267	0.000999001
OX345642.1	5400000	12.31	0.000999001
OX345642.1	5500000	8.17333	0.000999001
OX345642.1	5600000	8.23333	0.000999001
OX345642.1	5700000	10.5033	0.000999001
OX345642.1	5800000	5.50667	0.000999001
OX345642.1	5900000	3.25333	0.000999001
OX345642.1	6000000	2	0.0519481
OX345642.1	6100000	7.79333	0.000999001
OX345642.1	6200000	8.10333	0.000999001
OX345642.1	6300000	10.7067	0.000999001
OX345642.1	6400000	11.49	0.000999001
OX345642.1	6500000	12.1167	0.000999001
OX345642.1	6600000	11.5033	0.000999001
OX345642.1	6700000	10.9267	0.000999001
OX345642.1	6800000	11.2233	0.000999001
OX345642.1	6900000	10.5833	0.000999001
OX345642.1	7000000	9.60667	0.000999001
OX345642.1	7100000	11.9567	0.000999001
OX345642.1	7200000	8.46	0.000999001
OX345642.1	7300000	8.48333	0.000999001
OX345642.1	7400000	9.77667	0.000999001
OX345642.1	7500000	2.23667	0.000999001
OX345643.1	0	2.16667	0.000999001
OX345643.1	100000	7.38333	0.000999001
OX345643.1	200000	9.09667	0.000999001
OX345643.1	300000	10.4567	0.000999001
OX345643.1	400000	10.92	0.000999001
OX345643.1	500000	12.2333	0.000999001
OX345643.1	600000	11.66	0.000999001
OX345643.1	700000	11.3367	0.000999001
OX345643.1	800000	10.5667	0.000999001
OX345643.1	900000	12.16	0.000999001
OX345643.1	1000000	12.2367	0.000999001
OX345643.1	1100000	10.2633	0.000999001
OX345643.1	1200000	8.52333	0.000999001
OX345643.1	1300000	5.68	0.000999001
OX345643.1	1400000	10.4133	0.000999001
OX345643.1	1500000	10.3467	0.000999001
OX345643.1	1600000	2.26667	0.101898
OX345643.1	1700000	4.42667	0.000999001
OX345643.1	1800000	10.0167	0.000999001
OX345643.1	1900000	10.57	0.000999001
OX345643.1	2000000	8.15667	0.000999001
OX345643.1	2100000	12.9367	0.000999001
OX345643.1	2200000	7.95667	0.000999001
OX345643.1	2300000	13.4333	0.000999001
OX345643.1	2400000	5.8	0.000999001
OX345643.1	2500000	15.1333	0.000999001
OX345643.1	2600000	-1.14333	0.466533
OX345643.1	2700000	12.9267	0.000999001
OX345643.1	2800000	15.0867	0.000999001
OX345643.1	2900000	9.17	0.000999001
OX345643.1	3000000	11.12	0.000999001
OX345643.1	3100000	10.45	0.000999001
OX345643.1	3200000	8.55	0.000999001
OX345643.1	3300000	0.743333	0.000999001
OX345643.1	3400000	0.156667	0.000999001
OX345643.1	3500000	0.883333	0.000999001
OX345643.1	3600000	9.55333	0.000999001
OX345643.1	3700000	9.63667	0.000999001
OX345643.1	3800000	9.83333	0.000999001
OX345643.1	3900000	12.1533	0.000999001
OX345643.1	4000000	12.18	0.000999001
OX345643.1	4100000	12.5767	0.000999001
OX345643.1	4200000	10.74	0.000999001
OX345643.1	4300000	8.82	0.000999001
OX345643.1	4400000	9.15	0.000999001
OX345643.1	4500000	12.87	0.000999001
OX345643.1	4600000	8.17333	0.000999001
OX345643.1	4700000	3.78667	0.000999001
OX345643.1	4800000	4.48	0.000999001
OX345643.1	4900000	9.04667	0.000999001
OX345643.1	5000000	10.2133	0.000999001
OX345643.1	5100000	9.79333	0.000999001
OX345643.1	5200000	11.2367	0.000999001
OX345643.1	5300000	11.7633	0.000999001
OX345643.1	5400000	11.86	0.000999001
OX345643.1	5500000	8.69	0.000999001
OX345643.1	5600000	9.28	0.000999001
OX345643.1	5700000	9.58667	0.000999001
OX345643.1	5800000	7.61667	0.000999001
OX345643.1	5900000	6.42667	0.000999001
OX345643.1	6000000	8.29667	0.000999001
OX345643.1	6100000	10.8167	0.000999001
OX345643.1	6200000	11.4433	0.000999001
OX345643.1	6300000	8.79	0.000999001
OX345643.1	6400000	9.16333	0.000999001
OX345643.1	6500000	10.88	0.000999001
OX345643.1	6600000	10.6333	0.000999001
OX345643.1	6700000	9.16667	0.000999001
OX345643.1	6800000	9.02667	0.000999001
OX345643.1	6900000	8.04667	0.000999001
OX345643.1	7000000	1.9	0.000999001
OX345644.1	0	5.02667	0.000999001
OX345644.1	100000	9.63667	0.000999001
OX345644.1	200000	10.0933	0.000999001
OX345644.1	300000	11.23	0.000999001
OX345644.1	400000	5.84	0.000999001
OX345644.1	500000	10.7433	0.000999001
OX345644.1	600000	7.24333	0.000999001
OX345644.1	700000	8.66333	0.000999001
OX345644.1	800000	11.0567	0.000999001
OX345644.1	900000	8.97333	0.000999001
OX345644.1	1000000	11.15	0.000999001
OX345644.1	1100000	7.91667	0.000999001
OX345644.1	1200000	5.12667	0.000999001
OX345644.1	1300000	11.3667	0.000999001
OX345644.1	1400000	11.11	0.000999001
OX345644.1	1500000	10.5367	0.000999001
OX345644.1	1600000	7.21667	0.000999001
OX345644.1	1700000	12.4167	0.000999001
OX345644.1	1800000	8.28333	0.000999001
OX345644.1	1900000	1.82333	0.000999001
OX345644.1	2000000	2.77667	0.000999001
OX345644.1	2100000	10.1933	0.000999001
OX345644.1	2200000	7.44667	0.000999001
OX345644.1	2300000	8.96667	0.000999001
OX345644.1	2400000	11.6767	0.000999001
OX345644.1	2500000	12.8167	0.000999001
OX345644.1	2600000	10.57	0.000999001
OX345644.1	2700000	7.91	0.000999001
OX345644.1	2800000	11.5733	0.000999001
OX345644.1	2900000	9.06667	0.000999001
OX345644.1	3000000	9.66333	0.000999001
OX345644.1	3100000	9.92667	0.000999001
OX345644.1	3200000	9.71667	0.000999001
OX345644.1	3300000	10.7433	0.000999001
OX345644.1	3400000	3.62	0.000999001
OX345644.1	3500000	4.03667	0.000999001
OX345644.1	3600000	4.63667	0.000999001
OX345644.1	3700000	8.19333	0.000999001
OX345644.1	3800000	8.77	0.000999001
OX345644.1	3900000	7.05667	0.000999001
OX345644.1	4000000	11.6367	0.000999001
OX345644.1	4100000	11.9733	0.000999001
OX345644.1	4200000	9.41667	0.000999001
OX345644.1	4300000	11.3333	0.000999001
OX345644.1	4400000	8.26	0.000999001
OX345644.1	4500000	12.81	0.000999001
OX345644.1	4600000	12.49	0.000999001
OX345644.1	4700000	7.35333	0.000999001
OX345644.1	4800000	0.94	0.000999001
OX345644.1	4900000	3.16333	0.000999001
OX345644.1	5000000	9.6	0.000999001
OX345644.1	5100000	11.6167	0.000999001
OX345644.1	5200000	10.4033	0.000999001
OX345644.1	5300000	8.17667	0.000999001
OX345644.1	5400000	9.62667	0.000999001
OX345644.1	5500000	8.66667	0.000999001
OX345644.1	5600000	6.43	0.000999001
OX345644.1	5700000	12.15	0.000999001
OX345644.1	5800000	7.15667	0.000999001
OX345644.1	5900000	7.44	0.000999001
OX345644.1	6000000	13.2367	0.000999001
OX345644.1	6100000	10.6567	0.000999001
OX345644.1	6200000	11.1367	0.000999001
OX345644.1	6300000	11.9467	0.000999001
OX345644.1	6400000	13.1433	0.000999001
OX345644.1	6500000	12.88	0.000999001
OX345644.1	6600000	12.78	0.000999001
OX345644.1	6700000	10.7033	0.000999001
OX345644.1	6800000	10.6533	0.000999001
OX345644.1	6900000	7.62333	0.000999001
OX345645.1	0	2.71	0.000999001
OX345645.1	100000	7.4	0.000999001
OX345645.1	200000	8.87333	0.000999001
OX345645.1	300000	11.1967	0.000999001
OX345645.1	400000	9.04333	0.000999001
OX345645.1	500000	8.55	0.000999001
OX345645.1	600000	9.32667	0.000999001
OX345645.1	700000	7.83333	0.000999001
OX345645.1	800000	9.01333	0.000999001
OX345645.1	900000	11.31	0.000999001
OX345645.1	1000000	10.74	0.000999001
OX345645.1	1100000	10.74	0.000999001
OX345645.1	1200000	8.54667	0.000999001
OX345645.1	1300000	5.00333	0.000999001
OX345645.1	1400000	9.84667	0.000999001
OX345645.1	1500000	10.7233	0.000999001
OX345645.1	1600000	7.58	0.000999001
OX345645.1	1700000	10.0467	0.000999001
OX345645.1	1800000	8.44333	0.000999001
OX345645.1	1900000	8.75667	0.000999001
OX345645.1	2000000	10.43	0.000999001
OX345645.1	2100000	10.42	0.000999001
OX345645.1	2200000	9.78333	0.000999001
OX345645.1	2300000	1.86	0.0519481
OX345645.1	2400000	8.48667	0.000999001
OX345645.1	2500000	10.2433	0.000999001
OX345645.1	2600000	7.62333	0.000999001
OX345645.1	2700000	12.7567	0.000999001
OX345645.1	2800000	5.63333	0.000999001
OX345645.1	2900000	3.91	0.000999001
OX345645.1	3000000	3.58667	0.000999001
OX345645.1	3100000	10.7567	0.000999001
OX345645.1	3200000	10.4067	0.000999001
OX345645.1	3300000	11.9067	0.000999001
OX345645.1	3400000	17.6867	0.000999001
OX345645.1	3500000	11.1867	0.000999001
OX345645.1	3600000	12.1833	0.000999001
OX345645.1	3700000	10.4867	0.000999001
OX345645.1	3800000	3.77	0.000999001
OX345645.1	3900000	6.62333	0.000999001
OX345645.1	4000000	10.5333	0.000999001
OX345645.1	4100000	6.68	0.000999001
OX345645.1	4200000	8.42667	0.000999001
OX345645.1	4300000	1.77667	0.043956
OX345645.1	4400000	6.71667	0.000999001
OX345645.1	4500000	4.9	0.000999001
OX345645.1	4600000	1.90333	0.000999001
OX345645.1	4700000	1.40667	0.000999001
OX345645.1	4800000	1.26333	0.000999001
OX345645.1	4900000	4.55333	0.0519481
OX345645.1	5000000	4.76	0.000999001
OX345645.1	5100000	6.25	0.000999001
OX345645.1	5200000	3.11	0.043956
OX345645.1	5300000	6.83667	0.000999001
OX345645.1	5400000	6.78667	0.000999001
OX345645.1	5500000	4.86667	0.000999001
OX345645.1	5600000	3.75	0.000999001
OX345645.1	5700000	3.44	0.000999001
OX345645.1	5800000	2.91	0.000999001
OX345645.1	5900000	6.55	0.000999001
OX345645.1	6000000	14.2567	0.000999001
OX345645.1	6100000	13.9233	0.000999001
OX345645.1	6200000	7.18667	0.000999001
OX345645.1	6300000	4.4	0.000999001
OX345645.1	6400000	11.2	0.000999001
OX345645.1	6500000	13.5867	0.000999001
OX345645.1	6600000	13.3333	0.000999001
OX345645.1	6700000	8.93667	0.000999001
OX345645.1	6800000	3.26	0.000999001
OX345646.1	0	4.77333	0.000999001
OX345646.1	100000	10.19	0.000999001
OX345646.1	200000	9.28	0.000999001
OX345646.1	300000	10.8833	0.000999001
OX345646.1	400000	10.9267	0.000999001
OX345646.1	500000	9.90333	0.000999001
OX345646.1	600000	9.61	0.000999001
OX345646.1	700000	12.2267	0.000999001
OX345646.1	800000	10.0567	0.000999001
OX345646.1	900000	11.8367	0.000999001
OX345646.1	1000000	9.78	0.000999001
OX345646.1	1100000	11.5433	0.000999001
OX345646.1	1200000	12.7233	0.000999001
OX345646.1	1300000	8.7	0.000999001
OX345646.1	1400000	2.43333	0.0949051
OX345646.1	1500000	2.72667	0.193806
OX345646.1	1600000	8.46667	0.000999001
OX345646.1	1700000	12.6267	0.000999001
OX345646.1	1800000	14.3333	0.000999001
OX345646.1	1900000	8.45	0.000999001
OX345646.1	2000000	12.5	0.000999001
OX345646.1	2100000	7.87333	0.000999001
OX345646.1	2200000	10.9	0.000999001
OX345646.1	2300000	12.32	0.000999001
OX345646.1	2400000	8.59333	0.000999001
OX345646.1	2500000	12.2433	0.000999001
OX345646.1	2600000	9.62667	0.000999001
OX345646.1	2700000	7.99	0.000999001
OX345646.1	2800000	0.273333	0.000999001
OX345646.1	2900000	1.63	0.000999001
OX345646.1	3000000	12.0767	0.000999001
OX345646.1	3100000	9.05333	0.0519481
OX345646.1	3200000	9.42667	0.000999001
OX345646.1	3300000	3.50333	0.000999001
OX345646.1	3400000	1.91	0.000999001
OX345646.1	3500000	1.08	0.000999001
OX345646.1	3600000	3.02333	0.000999001
OX345646.1	3700000	1.42333	0.000999001
OX345646.1	3800000	2.40667	0.000999001
OX345646.1	3900000	1.88	0.197802
OX345646.1	4000000	8.44	0.000999001
OX345646.1	4100000	8.74333	0.000999001
OX345646.1	4200000	5.95333	0.000999001
OX345646.1	4300000	3.37667	0.000999001
OX345646.1	4400000	10.6933	0.000999001
OX345646.1	4500000	13.43	0.000999001
OX345646.1	4600000	7.31667	0.000999001
OX345646.1	4700000	10.0033	0.000999001
OX345646.1	4800000	12.73	0.000999001
OX345646.1	4900000	9.55	0.000999001
OX345646.1	5000000	10.2033	0.000999001
OX345646.1	5100000	10.0967	0.000999001
OX345646.1	5200000	10.4133	0.000999001
OX345646.1	5300000	7.83333	0.000999001
OX345646.1	5400000	12.6167	0.000999001
OX345646.1	5500000	11.63	0.000999001
OX345646.1	5600000	13.06	0.000999001
OX345646.1	5700000	12.3033	0.000999001
OX345646.1	5800000	10.11	0.000999001
OX345646.1	5900000	10.0167	0.000999001
OX345646.1	6000000	1.78667	0.000999001
OX345646.1	6100000	0.0166667	0.000999001
OX345647.1	0	5.99	0.000999001
OX345647.1	100000	9.93667	0.000999001
OX345647.1	200000	7.59667	0.000999001
OX345647.1	300000	8.44	0.000999001
OX345647.1	400000	7.48667	0.000999001
OX345647.1	500000	8.87333	0.000999001
OX345647.1	600000	8.93667	0.000999001
OX345647.1	700000	9.43	0.000999001
OX345647.1	800000	6.05	0.000999001
OX345647.1	900000	10.75	0.000999001
OX345647.1	1000000	13.63	0.000999001
OX345647.1	1100000	11.45	0.000999001
OX345647.1	1200000	11.4467	0.000999001
OX345647.1	1300000	10.9267	0.000999001
OX345647.1	1400000	9.15	0.000999001
OX345647.1	1500000	13.19	0.000999001
OX345647.1	1600000	8.92667	0.000999001
OX345647.1	1700000	4.82667	0.000999001
OX345647.1	1800000	11.5933	0.000999001
OX345647.1	1900000	12.0567	0.000999001
OX345647.1	2000000	8.47	0.000999001
OX345647.1	2100000	9.54	0.000999001
OX345647.1	2200000	8.96333	0.000999001
OX345647.1	2300000	10.2567	0.000999001
OX345647.1	2400000	11.42	0.000999001
OX345647.1	2500000	10.0667	0.000999001
OX345647.1	2600000	6.36333	0.000999001
OX345647.1	2700000	0.723333	0.000999001
OX345647.1	2800000	0.563333	0.000999001
OX345647.1	2900000	0.243333	0.000999001
OX345647.1	3000000	1.16	0.043956
OX345647.1	3100000	6.33667	0.000999001
OX345647.1	3200000	9.64	0.000999001
OX345647.1	3300000	10.9533	0.000999001
OX345647.1	3400000	11.18	0.000999001
OX345647.1	3500000	12.4033	0.000999001
OX345647.1	3600000	12.8867	0.000999001
OX345647.1	3700000	12.2133	0.000999001
OX345647.1	3800000	5.75667	0.000999001
OX345647.1	3900000	9.25333	0.000999001
OX345647.1	4000000	7.86667	0.000999001
OX345647.1	4100000	10.0367	0.000999001
OX345647.1	4200000	7.84	0.000999001
OX345647.1	4300000	7.20333	0.000999001
OX345647.1	4400000	10.41	0.000999001
OX345647.1	4500000	10.53	0.000999001
OX345647.1	4600000	5.59333	0.000999001
OX345647.1	4700000	8.43667	0.000999001
OX345647.1	4800000	9.05	0.000999001
OX345647.1	4900000	11.8533	0.000999001
OX345647.1	5000000	11.29	0.000999001
OX345647.1	5100000	7.43	0.000999001
OX345647.1	5200000	5.95333	0.000999001
OX345647.1	5300000	11.5067	0.000999001
OX345647.1	5400000	11.6967	0.000999001
OX345647.1	5500000	11.4767	0.000999001
OX345647.1	5600000	10.61	0.000999001
OX345647.1	5700000	9.92333	0.000999001
OX345647.1	5800000	9.05667	0.000999001
OX345647.1	5900000	8.15333	0.000999001
OX345647.1	6000000	5.80333	0.000999001
OX345648.1	0	4.17667	0.000999001
OX345648.1	100000	8.02333	0.000999001
OX345648.1	200000	10.5667	0.000999001
OX345648.1	300000	9.95	0.000999001
OX345648.1	400000	9.96	0.000999001
OX345648.1	500000	11.0967	0.000999001
OX345648.1	600000	11.9633	0.000999001
OX345648.1	700000	10.73	0.000999001
OX345648.1	800000	5.50667	0.000999001
OX345648.1	900000	9.85	0.000999001
OX345648.1	1000000	11.0967	0.000999001
OX345648.1	1100000	12.8767	0.000999001
OX345648.1	1200000	11.8067	0.000999001
OX345648.1	1300000	10.13	0.000999001
OX345648.1	1400000	4.72	0.000999001
OX345648.1	1500000	2.27333	0.0519481
OX345648.1	1600000	12.43	0.000999001
OX345648.1	1700000	11.04	0.000999001
OX345648.1	1800000	9.48333	0.000999001
OX345648.1	1900000	8.98	0.000999001
OX345648.1	2000000	8.32333	0.000999001
OX345648.1	2100000	7.98333	0.000999001
OX345648.1	2200000	9.47	0.000999001
OX345648.1	2300000	14.37	0.000999001
OX345648.1	2400000	6.95667	0.000999001
OX345648.1	2500000	12.7533	0.000999001
OX345648.1	2600000	1.99333	0.000999001
OX345648.1	2700000	6.10667	0.000999001
OX345648.1	2800000	2.32667	0.000999001
OX345648.1	2900000	0.46	0.000999001
OX345648.1	3000000	3.52667	0.000999001
OX345648.1	3100000	5.5	0.000999001
OX345648.1	3200000	9.75	0.000999001
OX345648.1	3300000	12.4933	0.000999001
OX345648.1	3400000	9.55333	0.000999001
OX345648.1	3500000	9.36333	0.000999001
OX345648.1	3600000	3.91	0.000999001
OX345648.1	3700000	10.3033	0.000999001
OX345648.1	3800000	11.01	0.000999001
OX345648.1	3900000	11.93	0.000999001
OX345648.1	4000000	4.48667	0.000999001
OX345648.1	4100000	11.1833	0.000999001
OX345648.1	4200000	12.1933	0.000999001
OX345648.1	4300000	5.37	0.043956
OX345648.1	4400000	11.93	0.000999001
OX345648.1	4500000	11.6633	0.000999001
OX345648.1	4600000	9.80667	0.000999001
OX345648.1	4700000	10.5333	0.000999001
OX345648.1	4800000	11.3133	0.000999001
OX345648.1	4900000	9.09333	0.000999001
OX345648.1	5000000	14.0833	0.000999001
OX345648.1	5100000	8.02333	0.000999001
OX345648.1	5200000	10.6733	0.000999001
OX345648.1	5300000	10.8167	0.000999001
OX345648.1	5400000	10.9033	0.000999001
OX345648.1	5500000	9.64667	0.000999001
OX345648.1	5600000	10.34	0.000999001
OX345648.1	5700000	10.9167	0.000999001
OX345648.1	5800000	9.72667	0.000999001
OX345648.1	5900000	7.5	0.000999001
OX345649.1	0	3.52667	0.000999001
OX345649.1	100000	9.63667	0.000999001
OX345649.1	200000	8.47667	0.000999001
OX345649.1	300000	10.5767	0.000999001
OX345649.1	400000	10.6667	0.000999001
OX345649.1	500000	12.13	0.000999001
OX345649.1	600000	11.1667	0.000999001
OX345649.1	700000	11.1967	0.000999001
OX345649.1	800000	11.3067	0.000999001
OX345649.1	900000	11.9133	0.000999001
OX345649.1	1000000	9.22667	0.000999001
OX345649.1	1100000	13.19	0.000999001
OX345649.1	1200000	10.4333	0.000999001
OX345649.1	1300000	8.56	0.000999001
OX345649.1	1400000	11.8867	0.000999001
OX345649.1	1500000	10.8	0.000999001
OX345649.1	1600000	7.44	0.000999001
OX345649.1	1700000	11.98	0.000999001
OX345649.1	1800000	9.48333	0.000999001
OX345649.1	1900000	8.41	0.000999001
OX345649.1	2000000	13.3267	0.000999001
OX345649.1	2100000	11.3733	0.000999001
OX345649.1	2200000	7.08333	0.000999001
OX345649.1	2300000	0.416667	0.0949051
OX345649.1	2400000	0.316667	0.000999001
OX345649.1	2500000	2.14	0.000999001
OX345649.1	2600000	10.0767	0.000999001
OX345649.1	2700000	9.61667	0.000999001
OX345649.1	2800000	10.0567	0.000999001
OX345649.1	2900000	11.2533	0.000999001
OX345649.1	3000000	9.81333	0.000999001
OX345649.1	3100000	11.2533	0.000999001
OX345649.1	3200000	8.29333	0.000999001
OX345649.1	3300000	9.40333	0.000999001
OX345649.1	3400000	8.27333	0.000999001
OX345649.1	3500000	9.87333	0.000999001
OX345649.1	3600000	12.5267	0.000999001
OX345649.1	3700000	10.3933	0.000999001
OX345649.1	3800000	9.82667	0.000999001
OX345649.1	3900000	10.02	0.000999001
OX345649.1	4000000	10.1033	0.000999001
OX345649.1	4100000	7.55	0.000999001
OX345649.1	4200000	8.85333	0.000999001
OX345649.1	4300000	10.5533	0.000999001
OX345649.1	4400000	12.1333	0.000999001
OX345649.1	4500000	10.5467	0.000999001
OX345649.1	4600000	9.67	0.000999001
OX345649.1	4700000	9.98667	0.000999001
OX345649.1	4800000	10.84	0.000999001
OX345649.1	4900000	9.69	0.000999001
OX345649.1	5000000	7.21667	0.000999001
OX345649.1	5100000	11.0533	0.000999001
OX345649.1	5200000	10.47	0.000999001
OX345649.1	5300000	9.29667	0.000999001
OX345649.1	5400000	11.86	0.000999001
OX345649.1	5500000	9.41667	0.000999001
OX345649.1	5600000	10.4633	0.000999001
OX345649.1	5700000	8.94333	0.000999001
OX345649.1	5800000	9.12	0.000999001
OX345649.1	5900000	5.76667	0.000999001
OX345650.1	0	1.64	0.000999001
OX345650.1	100000	8.05	0.000999001
OX345650.1	200000	8.75333	0.000999001
OX345650.1	300000	9.13	0.000999001
OX345650.1	400000	10.3	0.000999001
OX345650.1	500000	9.50333	0.000999001
OX345650.1	600000	8.73	0.000999001
OX345650.1	700000	11.8767	0.000999001
OX345650.1	800000	11.4667	0.000999001
OX345650.1	900000	11.2467	0.000999001
OX345650.1	1000000	10.8333	0.000999001
OX345650.1	1100000	5.69333	0.000999001
OX345650.1	1200000	9.86667	0.000999001
OX345650.1	1300000	11.4667	0.000999001
OX345650.1	1400000	10.3733	0.000999001
OX345650.1	1500000	10.5233	0.000999001
OX345650.1	1600000	4.77333	0.000999001
OX345650.1	1700000	7.64333	0.000999001
OX345650.1	1800000	9.96667	0.000999001
OX345650.1	1900000	11.6567	0.000999001
OX345650.1	2000000	9.93667	0.000999001
OX345650.1	2100000	13.7767	0.000999001
OX345650.1	2200000	10.0667	0.000999001
OX345650.1	2300000	12.65	0.000999001
OX345650.1	2400000	9.87667	0.000999001
OX345650.1	2500000	11.27	0.000999001
OX345650.1	2600000	2.32333	0.000999001
OX345650.1	2700000	1.39	0.000999001
OX345650.1	2800000	9.12667	0.000999001
OX345650.1	2900000	11.0033	0.000999001
OX345650.1	3000000	10.7033	0.000999001
OX345650.1	3100000	10.3433	0.000999001
OX345650.1	3200000	12.3267	0.000999001
OX345650.1	3300000	8.95333	0.000999001
OX345650.1	3400000	8.41667	0.000999001
OX345650.1	3500000	10.47	0.000999001
OX345650.1	3600000	12.0133	0.000999001
OX345650.1	3700000	11.31	0.000999001
OX345650.1	3800000	5.47	0.000999001
OX345650.1	3900000	8.96333	0.000999001
OX345650.1	4000000	10.43	0.000999001
OX345650.1	4100000	10.4367	0.000999001
OX345650.1	4200000	11.0333	0.000999001
OX345650.1	4300000	9.61667	0.000999001
OX345650.1	4400000	10.6333	0.000999001
OX345650.1	4500000	8.91333	0.000999001
OX345650.1	4600000	9.60667	0.000999001
OX345650.1	4700000	9.47333	0.000999001
OX345650.1	4800000	13.1133	0.000999001
OX345650.1	4900000	11.0333	0.000999001
OX345650.1	5000000	9.82333	0.000999001
OX345650.1	5100000	9.07333	0.000999001
OX345650.1	5200000	9.45333	0.000999001
OX345650.1	5300000	8.17333	0.000999001
OX345650.1	5400000	8.3	0.000999001
OX345650.1	5500000	5.55	0.000999001
OX345651.1	0	5.11	0.000999001
OX345651.1	100000	12.58	0.000999001
OX345651.1	200000	9.38333	0.000999001
OX345651.1	300000	7.86667	0.000999001
OX345651.1	400000	7.27333	0.000999001
OX345651.1	500000	5.87	0.000999001
OX345651.1	600000	6.35333	0.000999001
OX345651.1	700000	10.5833	0.000999001
OX345651.1	800000	9.96	0.000999001
OX345651.1	900000	10.24	0.000999001
OX345651.1	1000000	12.58	0.000999001
OX345651.1	1100000	9.62667	0.000999001
OX345651.1	1200000	11.6367	0.000999001
OX345651.1	1300000	12.73	0.000999001
OX345651.1	1400000	12.7	0.000999001
OX345651.1	1500000	13.8	0.000999001
OX345651.1	1600000	10.6833	0.000999001
OX345651.1	1700000	11.8367	0.000999001
OX345651.1	1800000	6.07667	0.000999001
OX345651.1	1900000	2.76	0.000999001
OX345651.1	2000000	0.05	0.0509491
OX345651.1	2100000	2.22	0.000999001
OX345651.1	2200000	8.67333	0.000999001
OX345651.1	2300000	11.2167	0.000999001
OX345651.1	2400000	8.52667	0.000999001
OX345651.1	2500000	11.2933	0.000999001
OX345651.1	2600000	8.26	0.000999001
OX345651.1	2700000	7.98	0.000999001
OX345651.1	2800000	10.4333	0.000999001
OX345651.1	2900000	9.72	0.000999001
OX345651.1	3000000	5.51667	0.000999001
OX345651.1	3100000	11.5567	0.000999001
OX345651.1	3200000	5.70667	0.000999001
OX345651.1	3300000	8.94333	0.000999001
OX345651.1	3400000	10.41	0.000999001
OX345651.1	3500000	11.8167	0.000999001
OX345651.1	3600000	7.25333	0.000999001
OX345651.1	3700000	9.76333	0.000999001
OX345651.1	3800000	10.8467	0.000999001
OX345651.1	3900000	11.4967	0.000999001
OX345651.1	4000000	9.60333	0.000999001
OX345651.1	4100000	11.3933	0.000999001
OX345651.1	4200000	9.97667	0.000999001
OX345651.1	4300000	12.9567	0.000999001
OX345651.1	4400000	11.2033	0.000999001
OX345651.1	4500000	4.43333	0.000999001
OX345651.1	4600000	7.68	0.000999001
OX345651.1	4700000	10.8367	0.000999001
OX345651.1	4800000	10.4433	0.000999001
OX345651.1	4900000	9.89667	0.000999001
OX345651.1	5000000	9.58333	0.000999001
OX345651.1	5100000	9.32667	0.000999001
OX345651.1	5200000	6.26667	0.000999001
OX345651.1	5300000	1.25	0.000999001
OX345652.1	0	6.55333	0.000999001
OX345652.1	100000	8.62	0.000999001
OX345652.1	200000	8.93667	0.000999001
OX345652.1	300000	11.3933	0.000999001
OX345652.1	400000	10.4267	0.000999001
OX345652.1	500000	11.85	0.000999001
OX345652.1	600000	13.1833	0.000999001
OX345652.1	700000	10.29	0.000999001
OX345652.1	800000	13.9567	0.000999001
OX345652.1	900000	10.1567	0.000999001
OX345652.1	1000000	9.65	0.000999001
OX345652.1	1100000	4.58667	0.000999001
OX345652.1	1200000	8.21667	0.000999001
OX345652.1	1300000	7.40333	0.000999001
OX345652.1	1400000	10.6633	0.000999001
OX345652.1	1500000	10.45	0.000999001
OX345652.1	1600000	9.81667	0.000999001
OX345652.1	1700000	4.77	0.000999001
OX345652.1	1800000	4.71333	0.000999001
OX345652.1	1900000	1.38667	0.000999001
OX345652.1	2000000	0.206667	0.000999001
OX345652.1	2100000	0.0866667	0.0939061
OX345652.1	2200000	-0.0233333	0.373626
OX345652.1	2300000	5.78	0.000999001
OX345652.1	2400000	4.58333	0.000999001
OX345652.1	2500000	7.86667	0.000999001
OX345652.1	2600000	10.83	0.000999001
OX345652.1	2700000	8.04333	0.000999001
OX345652.1	2800000	10.62	0.000999001
OX345652.1	2900000	10.52	0.000999001
OX345652.1	3000000	9.75333	0.000999001
OX345652.1	3100000	10.1467	0.000999001
OX345652.1	3200000	10.1633	0.000999001
OX345652.1	3300000	8.48667	0.000999001
OX345652.1	3400000	11.9633	0.000999001
OX345652.1	3500000	10.1867	0.000999001
OX345652.1	3600000	11.7967	0.000999001
OX345652.1	3700000	5.24	0.000999001
OX345652.1	3800000	8.48333	0.000999001
OX345652.1	3900000	13.0767	0.000999001
OX345652.1	4000000	8.93	0.000999001
OX345652.1	4100000	8.85	0.000999001
OX345652.1	4200000	9.52	0.000999001
OX345652.1	4300000	10.9967	0.000999001
OX345652.1	4400000	10.7467	0.000999001
OX345652.1	4500000	9.93667	0.000999001
OX345652.1	4600000	10.8833	0.000999001
OX345652.1	4700000	10.1833	0.000999001
OX345652.1	4800000	8.46	0.000999001
OX345652.1	4900000	8.39	0.000999001
OX345652.1	5000000	5.83333	0.000999001
OX345652.1	5100000	0.106667	0.000999001
OX345653.1	0	3.78	0.000999001
OX345653.1	100000	9.25333	0.000999001
OX345653.1	200000	9.21333	0.000999001
OX345653.1	300000	8.83	0.000999001
OX345653.1	400000	10.1633	0.000999001
OX345653.1	500000	12.5567	0.000999001
OX345653.1	600000	9.44667	0.000999001
OX345653.1	700000	9.29333	0.000999001
OX345653.1	800000	9.29667	0.000999001
OX345653.1	900000	10.35	0.000999001
OX345653.1	1000000	10.45	0.000999001
OX345653.1	1100000	10.17	0.000999001
OX345653.1	1200000	11.6833	0.000999001
OX345653.1	1300000	11.9	0.000999001
OX345653.1	1400000	12.2967	0.000999001
OX345653.1	1500000	11.3933	0.000999001
OX345653.1	1600000	11.8667	0.000999001
OX345653.1	1700000	12.5467	0.000999001
OX345653.1	1800000	14.2167	0.000999001
OX345653.1	1900000	10.25	0.000999001
OX345653.1	2000000	4.04333	0.000999001
OX345653.1	2100000	1.59	0.000999001
OX345653.1	2200000	5.33	0.000999001
OX345653.1	2300000	10.93	0.000999001
OX345653.1	2400000	8.75	0.000999001
OX345653.1	2500000	10.5433	0.000999001
OX345653.1	2600000	9.89	0.000999001
OX345653.1	2700000	10.0567	0.000999001
OX345653.1	2800000	10.8667	0.000999001
OX345653.1	2900000	12.01	0.000999001
OX345653.1	3000000	9.72333	0.000999001
OX345653.1	3100000	10.23	0.000999001
OX345653.1	3200000	8.59	0.000999001
OX345653.1	3300000	9.12667	0.000999001
OX345653.1	3400000	10.9733	0.000999001
OX345653.1	3500000	10.2267	0.000999001
OX345653.1	3600000	10.9367	0.000999001
OX345653.1	3700000	11.4633	0.000999001
OX345653.1	3800000	11.3633	0.000999001
OX345653.1	3900000	11.5033	0.000999001
OX345653.1	4000000	10.9767	0.000999001
OX345653.1	4100000	10.5567	0.000999001
OX345653.1	4200000	11.95	0.000999001
OX345653.1	4300000	8.02667	0.000999001
OX345653.1	4400000	8.62667	0.000999001
OX345653.1	4500000	8.17667	0.000999001
OX345653.1	4600000	8.20667	0.000999001
OX345653.1	4700000	3.3	0.000999001
CAMRGZ010000003.1	0	-0.306667	0.202797
CAMRGZ010000005.1	0	-0.15	0.373626
CAMRGZ010000010.1	0	-0.376667	0.0969031
CAMRGZ010000013.1	0	-0.36	0.0969031
OX345654.1	0	0.346667	0.000999001
OX345647.1	6100000	0.15	0.000999001
OX345649.1	6000000	0.116667	0.000999001
OX345650.1	5600000	0.09	0.000999001
CAMRGZ010000002.1	0	-1.42	0.0519481
CAMRGZ010000009.1	0	-0.456667	0.0519481
CAMRGZ010000014.1	0	-0.146667	0.0519481
CAMRGZ010000015.1	0	-0.363333	0.000999001
CAMRGZ010000016.1	0	-0.456667	0.0519481
CAMRGZ010000001.1	0	-0.316667	0.000999001
CAMRGZ010000006.1	0	-0.223333	0.000999001
CAMRGZ010000007.1	0	-0.363333	0.000999001
CAMRGZ010000008.1	0	-0.203333	0.000999001
CAMRGZ010000011.1	0	-0.206667	0.000999001
CAMRGZ010000012.1	0	-0.146667	0.000999001
CAMRGZ010000017.1	0	-0.01	0.000999001
OX345648.1	6000000	-0.0133333	0.000999001

## Sheet: SNPdensity_SexFindR_Phavent
scaf	base	mean_MvF_dif	Pvalue
odPhaVent1.1_Chr1	0	-0.665	0.000999001
odPhaVent1.1_Chr1	100000	-1.025	0.000999001
odPhaVent1.1_Chr1	200000	-0.79	0.000999001
odPhaVent1.1_Chr1	300000	-1.315	0.000999001
odPhaVent1.1_Chr1	400000	2.38	0.000999001
odPhaVent1.1_Chr1	500000	2.78	0.000999001
odPhaVent1.1_Chr1	600000	1.07	0.000999001
odPhaVent1.1_Chr1	700000	-0.045	0.31968
odPhaVent1.1_Chr1	800000	2.52	0.000999001
odPhaVent1.1_Chr1	900000	1.975	0.000999001
odPhaVent1.1_Chr1	1000000	3.5	0.000999001
odPhaVent1.1_Chr1	1100000	-4.35	0.000999001
odPhaVent1.1_Chr1	1200000	0.195	0.000999001
odPhaVent1.1_Chr1	1300000	1.255	0.000999001
odPhaVent1.1_Chr1	1400000	0.21	0.356643
odPhaVent1.1_Chr1	1500000	-4.24	0.000999001
odPhaVent1.1_Chr1	1600000	0	1
odPhaVent1.1_Chr1	1700000	1.68	0.000999001
odPhaVent1.1_Chr1	1800000	1.77636e-15	0.31968
odPhaVent1.1_Chr1	1900000	1.155	0.356643
odPhaVent1.1_Chr1	2000000	4.085	0.000999001
odPhaVent1.1_Chr1	2100000	1.115	0.000999001
odPhaVent1.1_Chr1	2200000	1.03	0.000999001
odPhaVent1.1_Chr1	2300000	0.05	0.356643
odPhaVent1.1_Chr1	2400000	-1.18	0.000999001
odPhaVent1.1_Chr1	2500000	-1.035	0.31968
odPhaVent1.1_Chr1	2600000	0.78	0.000999001
odPhaVent1.1_Chr1	2700000	-0.775	0.000999001
odPhaVent1.1_Chr1	2800000	-0.87	0.000999001
odPhaVent1.1_Chr1	2900000	0.065	0.31968
odPhaVent1.1_Chr1	3000000	-1.38	0.000999001
odPhaVent1.1_Chr1	3100000	-0.165	0.31968
odPhaVent1.1_Chr1	3200000	1.48	0.000999001
odPhaVent1.1_Chr1	3300000	0.24	0.356643
odPhaVent1.1_Chr1	3400000	1.405	0.000999001
odPhaVent1.1_Chr1	3500000	1.01	0.000999001
odPhaVent1.1_Chr1	3600000	3.11	0.000999001
odPhaVent1.1_Chr1	3700000	2.695	0.000999001
odPhaVent1.1_Chr1	3800000	-0.09	0.356643
odPhaVent1.1_Chr1	3900000	0.06	0.356643
odPhaVent1.1_Chr1	4000000	1.495	0.000999001
odPhaVent1.1_Chr1	4100000	-1.69	0.000999001
odPhaVent1.1_Chr1	4200000	0.045	0.356643
odPhaVent1.1_Chr1	4300000	-2.09	0.000999001
odPhaVent1.1_Chr1	4400000	-1.77	0.000999001
odPhaVent1.1_Chr1	4500000	0.785	0.000999001
odPhaVent1.1_Chr1	4600000	-1.3	0.000999001
odPhaVent1.1_Chr1	4700000	0.175	0.000999001
odPhaVent1.1_Chr1	4800000	-0.15	0.31968
odPhaVent1.1_Chr1	4900000	2.06	0.000999001
odPhaVent1.1_Chr1	5000000	0.14	0.31968
odPhaVent1.1_Chr1	5100000	0.265	0.31968
odPhaVent1.1_Chr1	5200000	-0.09	0.356643
odPhaVent1.1_Chr1	5300000	-2.7	0.000999001
odPhaVent1.1_Chr1	5400000	0.03	0.31968
odPhaVent1.1_Chr1	5500000	-1.185	0.000999001
odPhaVent1.1_Chr1	5600000	-0.23	0.356643
odPhaVent1.1_Chr1	5700000	0.23	0.31968
odPhaVent1.1_Chr1	5800000	-1.1	0.000999001
odPhaVent1.1_Chr1	5900000	0.645	0.000999001
odPhaVent1.1_Chr1	6000000	0.79	0.000999001
odPhaVent1.1_Chr1	6100000	-0.92	0.000999001
odPhaVent1.1_Chr1	6200000	-0.19	0.356643
odPhaVent1.1_Chr1	6300000	-0.685	0.000999001
odPhaVent1.1_Chr1	6400000	0.185	0.31968
odPhaVent1.1_Chr1	6500000	-0.22	0.356643
odPhaVent1.1_Chr1	6600000	2.935	0.000999001
odPhaVent1.1_Chr1	6700000	0.09	0.31968
odPhaVent1.1_Chr1	6800000	1.14	0.31968
odPhaVent1.1_Chr1	6900000	0.465	0.000999001
odPhaVent1.1_Chr1	7000000	-1.175	0.356643
odPhaVent1.1_Chr1	7100000	0.695	0.31968
odPhaVent1.1_Chr1	7200000	2.575	0.000999001
odPhaVent1.1_Chr1	7300000	-0.19	0.356643
odPhaVent1.1_Chr1	7400000	2.62	0.000999001
odPhaVent1.1_Chr1	7500000	4.685	0.000999001
odPhaVent1.1_Chr1	7600000	4.685	0.000999001
odPhaVent1.1_Chr1	7700000	4.71	0.000999001
odPhaVent1.1_Chr1	7800000	3.28	0.000999001
odPhaVent1.1_Chr1	7900000	4.66	0.000999001
odPhaVent1.1_Chr1	8000000	3.705	0.000999001
odPhaVent1.1_Chr1	8100000	0.535	0.31968
odPhaVent1.1_Chr1	8200000	0.54	0.31968
odPhaVent1.1_Chr1	8300000	-1.42	0.356643
odPhaVent1.1_Chr1	8400000	3.49	0.31968
odPhaVent1.1_Chr1	8500000	1.64	0.000999001
odPhaVent1.1_Chr1	8600000	3.52	0.000999001
odPhaVent1.1_Chr1	8700000	0.305	0.356643
odPhaVent1.1_Chr1	8800000	-0.29	0.31968
odPhaVent1.1_Chr1	8900000	0.05	0.356643
odPhaVent1.1_Chr1	9000000	1.605	0.000999001
odPhaVent1.1_Chr1	9100000	-3.11	0.000999001
odPhaVent1.1_Chr1	9200000	-0.335	0.000999001
odPhaVent1.1_Chr1	9300000	-0.01	0.31968
odPhaVent1.1_Chr1	9400000	-0.74	0.000999001
odPhaVent1.1_Chr1	9500000	-0.615	0.31968
odPhaVent1.1_Chr1	9600000	-0.815	0.000999001
odPhaVent1.1_Chr1	9700000	-2.485	0.000999001
odPhaVent1.1_Chr1	9800000	-0.64	0.000999001
odPhaVent1.1_Chr1	9900000	0.26	0.356643
odPhaVent1.1_Chr1	10000000	-0.98	0.000999001
odPhaVent1.1_Chr1	10100000	-3.95	0.000999001
odPhaVent1.1_Chr1	10200000	-0.79	0.000999001
odPhaVent1.1_Chr1	10300000	-0.425	0.356643
odPhaVent1.1_Chr1	10400000	1.185	0.000999001
odPhaVent1.1_Chr1	10500000	0.21	0.31968
odPhaVent1.1_Chr1	10600000	0.37	0.000999001
odPhaVent1.1_Chr1	10700000	1.21	0.000999001
odPhaVent1.1_Chr1	10800000	1.11	0.000999001
odPhaVent1.1_Chr1	10900000	0.005	0.31968
odPhaVent1.1_Chr1	11000000	0.77	0.000999001
odPhaVent1.1_Chr1	11100000	-0.54	0.000999001
odPhaVent1.1_Chr1	11200000	3.085	0.000999001
odPhaVent1.1_Chr1	11300000	2.975	0.000999001
odPhaVent1.1_Chr1	11400000	-0.13	0.31968
odPhaVent1.1_Chr1	11500000	1.16	0.31968
odPhaVent1.1_Chr1	11600000	1.52	0.000999001
odPhaVent1.1_Chr1	11700000	0.285	0.31968
odPhaVent1.1_Chr1	11800000	0.02	0.31968
odPhaVent1.1_Chr1	11900000	0.685	0.356643
odPhaVent1.1_Chr1	12000000	-3.24	0.000999001
odPhaVent1.1_Chr1	12100000	-3.845	0.000999001
odPhaVent1.1_Chr1	12200000	0.39	0.000999001
odPhaVent1.1_Chr1	12300000	-0.805	0.31968
odPhaVent1.1_Chr1	12400000	1.095	0.000999001
odPhaVent1.1_Chr1	12500000	-1.125	0.000999001
odPhaVent1.1_Chr1	12600000	1.23	0.356643
odPhaVent1.1_Chr1	12700000	-0.035	0.31968
odPhaVent1.1_Chr1	12800000	-1.305	0.000999001
odPhaVent1.1_Chr1	12900000	0.215	0.31968
odPhaVent1.1_Chr1	13000000	-3.81	0.000999001
odPhaVent1.1_Chr1	13100000	-1.23	0.000999001
odPhaVent1.1_Chr1	13200000	-0.75	0.000999001
odPhaVent1.1_Chr1	13300000	-1.735	0.000999001
odPhaVent1.1_Chr1	13400000	-1.65	0.000999001
odPhaVent1.1_Chr1	13500000	-0.91	0.000999001
odPhaVent1.1_Chr1	13600000	-0.48	0.356643
odPhaVent1.1_Chr1	13700000	-0.56	0.356643
odPhaVent1.1_Chr1	13800000	-2.855	0.000999001
odPhaVent1.1_Chr1	13900000	1.02	0.000999001
odPhaVent1.1_Chr1	14000000	-0.175	0.31968
odPhaVent1.1_Chr1	14100000	-2.085	0.000999001
odPhaVent1.1_Chr1	14200000	0.035	0.356643
odPhaVent1.1_Chr1	14300000	1.77	0.000999001
odPhaVent1.1_Chr1	14400000	-0.145	0.31968
odPhaVent1.1_Chr1	14500000	1.615	0.31968
odPhaVent1.1_Chr1	14600000	0.205	0.31968
odPhaVent1.1_Chr1	14700000	-0.615	0.356643
odPhaVent1.1_Chr1	14800000	-0.075	0.356643
odPhaVent1.1_Chr1	14900000	1.83	0.000999001
odPhaVent1.1_Chr1	15000000	-0.91	0.000999001
odPhaVent1.1_Chr1	15100000	-2.26	0.000999001
odPhaVent1.1_Chr1	15200000	0.005	0.31968
odPhaVent1.1_Chr1	15300000	-2.565	0.000999001
odPhaVent1.1_Chr1	15400000	0.53	0.000999001
odPhaVent1.1_Chr1	15500000	1.865	0.000999001
odPhaVent1.1_Chr1	15600000	-1.02	0.000999001
odPhaVent1.1_Chr1	15700000	-1.845	0.000999001
odPhaVent1.1_Chr1	15800000	-0.305	0.31968
odPhaVent1.1_Chr1	15900000	0.59	0.356643
odPhaVent1.1_Chr1	16000000	-2.015	0.000999001
odPhaVent1.1_Chr1	16100000	-2.09	0.000999001
odPhaVent1.1_Chr1	16200000	0.19	0.356643
odPhaVent1.1_Chr1	16300000	-0.545	0.31968
odPhaVent1.1_Chr1	16400000	1.355	0.000999001
odPhaVent1.1_Chr1	16500000	1.075	0.000999001
odPhaVent1.1_Chr1	16600000	-3.27	0.000999001
odPhaVent1.1_Chr1	16700000	-2.175	0.000999001
odPhaVent1.1_Chr1	16800000	0.95	0.000999001
odPhaVent1.1_Chr1	16900000	-3.355	0.000999001
odPhaVent1.1_Chr1	17000000	-1.425	0.000999001
odPhaVent1.1_Chr1	17100000	0.585	0.000999001
odPhaVent1.1_Chr1	17200000	-0.63	0.000999001
odPhaVent1.1_Chr1	17300000	0.44	0.31968
odPhaVent1.1_Chr1	17400000	0.43	0.31968
odPhaVent1.1_Chr1	17500000	-1.955	0.000999001
odPhaVent1.1_Chr1	17600000	0.09	0.31968
odPhaVent1.1_Chr1	17700000	0.1	0.000999001
odPhaVent1.1_Chr1_unloc_1	0	1.105	0.31968
odPhaVent1.1_Chr1_unloc_1	100000	1.33	0.31968
odPhaVent1.1_Chr1_unloc_2	0	1.325	0.000999001
odPhaVent1.1_Chr1_unloc_2	100000	-0.075	0.356643
odPhaVent1.1_Chr1_unloc_3	0	-0.57	0.000999001
odPhaVent1.1_Chr1_unloc_4	0	-0.415	0.356643
odPhaVent1.1_Chr1_unloc_5	0	-2.685	0.000999001
odPhaVent1.1_Chr1_unloc_6	0	0.675	0.000999001
odPhaVent1.1_Chr1_unloc_7	0	1	0.000999001
odPhaVent1.1_Chr1_unloc_8	0	-0.59	0.000999001
odPhaVent1.1_Chr2	0	-1.29	0.000999001
odPhaVent1.1_Chr2	100000	-4.69	0.000999001
odPhaVent1.1_Chr2	200000	-1.66	0.000999001
odPhaVent1.1_Chr2	300000	-0.575	0.356643
odPhaVent1.1_Chr2	400000	-1.275	0.000999001
odPhaVent1.1_Chr2	500000	2.28	0.000999001
odPhaVent1.1_Chr2	600000	-1.25	0.000999001
odPhaVent1.1_Chr2	700000	-0.36	0.000999001
odPhaVent1.1_Chr2	800000	-1.26	0.000999001
odPhaVent1.1_Chr2	900000	0.85	0.000999001
odPhaVent1.1_Chr2	1000000	0.745	0.31968
odPhaVent1.1_Chr2	1100000	-1.21	0.000999001
odPhaVent1.1_Chr2	1200000	-1.035	0.000999001
odPhaVent1.1_Chr2	1300000	-2.96	0.000999001
odPhaVent1.1_Chr2	1400000	-0.785	0.000999001
odPhaVent1.1_Chr2	1500000	-1.81	0.000999001
odPhaVent1.1_Chr2	1600000	-0.765	0.000999001
odPhaVent1.1_Chr2	1700000	-1.695	0.000999001
odPhaVent1.1_Chr2	1800000	0.03	0.31968
odPhaVent1.1_Chr2	1900000	-0.83	0.000999001
odPhaVent1.1_Chr2	2000000	-0.045	0.31968
odPhaVent1.1_Chr2	2100000	-2.15	0.000999001
odPhaVent1.1_Chr2	2200000	0.685	0.000999001
odPhaVent1.1_Chr2	2300000	-2.755	0.000999001
odPhaVent1.1_Chr2	2400000	-0.295	0.000999001
odPhaVent1.1_Chr2	2500000	-1.26	0.000999001
odPhaVent1.1_Chr2	2600000	0.13	0.31968
odPhaVent1.1_Chr2	2700000	-3.26	0.000999001
odPhaVent1.1_Chr2	2800000	-0.285	0.000999001
odPhaVent1.1_Chr2	2900000	-1.605	0.000999001
odPhaVent1.1_Chr2	3000000	-1.125	0.000999001
odPhaVent1.1_Chr2	3100000	-7.35	0.000999001
odPhaVent1.1_Chr2	3200000	-0.435	0.31968
odPhaVent1.1_Chr2	3300000	-1.14	0.000999001
odPhaVent1.1_Chr2	3400000	-1.205	0.000999001
odPhaVent1.1_Chr2	3500000	0.165	0.356643
odPhaVent1.1_Chr2	3600000	0.315	0.000999001
odPhaVent1.1_Chr2	3700000	-2.18	0.000999001
odPhaVent1.1_Chr2	3800000	1.52	0.356643
odPhaVent1.1_Chr2	3900000	-1.54	0.000999001
odPhaVent1.1_Chr2	4000000	0.61	0.000999001
odPhaVent1.1_Chr2	4100000	-0.265	0.31968
odPhaVent1.1_Chr2	4200000	-0.925	0.000999001
odPhaVent1.1_Chr2	4300000	0.19	0.000999001
odPhaVent1.1_Chr2	4400000	0.19	0.31968
odPhaVent1.1_Chr2	4500000	-1.355	0.000999001
odPhaVent1.1_Chr2	4600000	0.28	0.31968
odPhaVent1.1_Chr2	4700000	0.015	0.31968
odPhaVent1.1_Chr2	4800000	1.77	0.000999001
odPhaVent1.1_Chr2	4900000	-1.1	0.000999001
odPhaVent1.1_Chr2	5000000	-2.195	0.000999001
odPhaVent1.1_Chr2	5100000	-2.915	0.000999001
odPhaVent1.1_Chr2	5200000	-1.165	0.31968
odPhaVent1.1_Chr2	5300000	-1	0.000999001
odPhaVent1.1_Chr2	5400000	-3.87	0.000999001
odPhaVent1.1_Chr2	5500000	-0.26	0.000999001
odPhaVent1.1_Chr2	5600000	0.575	0.356643
odPhaVent1.1_Chr2	5700000	-1.05	0.000999001
odPhaVent1.1_Chr2	5800000	0.075	0.356643
odPhaVent1.1_Chr2	5900000	0.365	0.000999001
odPhaVent1.1_Chr2	6000000	1.95	0.000999001
odPhaVent1.1_Chr2	6100000	0.85	0.356643
odPhaVent1.1_Chr2	6200000	0.74	0.356643
odPhaVent1.1_Chr2	6300000	0.47	0.356643
odPhaVent1.1_Chr2	6400000	0.59	0.000999001
odPhaVent1.1_Chr2	6500000	-2.1	0.000999001
odPhaVent1.1_Chr2	6600000	-1.13	0.000999001
odPhaVent1.1_Chr2	6700000	-2.99	0.000999001
odPhaVent1.1_Chr2	6800000	-1.705	0.000999001
odPhaVent1.1_Chr2	6900000	0.715	0.000999001
odPhaVent1.1_Chr2	7000000	-0.03	0.356643
odPhaVent1.1_Chr2	7100000	-0.055	0.31968
odPhaVent1.1_Chr2	7200000	0.805	0.000999001
odPhaVent1.1_Chr2	7300000	2.55	0.000999001
odPhaVent1.1_Chr2	7400000	0.87	0.000999001
odPhaVent1.1_Chr2	7500000	0.59	0.000999001
odPhaVent1.1_Chr2	7600000	0.905	0.000999001
odPhaVent1.1_Chr2	7700000	-2.365	0.000999001
odPhaVent1.1_Chr2	7800000	-4.135	0.000999001
odPhaVent1.1_Chr2	7900000	-1.645	0.000999001
odPhaVent1.1_Chr2	8000000	0.455	0.000999001
odPhaVent1.1_Chr2	8100000	-1.82	0.000999001
odPhaVent1.1_Chr2	8200000	-1.025	0.000999001
odPhaVent1.1_Chr2	8300000	-1.34	0.000999001
odPhaVent1.1_Chr2	8400000	-1.12	0.000999001
odPhaVent1.1_Chr2	8500000	-0.15	0.31968
odPhaVent1.1_Chr2	8600000	-1.495	0.356643
odPhaVent1.1_Chr2	8700000	-0.01	0.000999001
odPhaVent1.1_Chr2	8800000	-0.23	0.000999001
odPhaVent1.1_Chr2	8900000	1.07	0.000999001
odPhaVent1.1_Chr2	9000000	-0.065	0.31968
odPhaVent1.1_Chr2	9100000	-0.575	0.000999001
odPhaVent1.1_Chr2_unloc_1	0	-1.04	0.000999001
odPhaVent1.1_Chr2_unloc_1	100000	0.39	0.000999001
odPhaVent1.1_Chr2_unloc_1	200000	-0.455	0.000999001
odPhaVent1.1_Chr2_unloc_2	0	-1.555	0.000999001
odPhaVent1.1_Chr2_unloc_3	0	-0.15	0.31968
odPhaVent1.1_Chr3	0	0.71	0.000999001
odPhaVent1.1_Chr3	100000	-0.155	0.000999001
odPhaVent1.1_Chr3	200000	1	0.000999001
odPhaVent1.1_Chr3	300000	0.19	0.000999001
odPhaVent1.1_Chr3	400000	0.06	0.356643
odPhaVent1.1_Chr3	500000	0.39	0.000999001
odPhaVent1.1_Chr3	600000	1.315	0.000999001
odPhaVent1.1_Chr3	700000	-1.025	0.000999001
odPhaVent1.1_Chr3	800000	-1.225	0.000999001
odPhaVent1.1_Chr3	900000	0.375	0.356643
odPhaVent1.1_Chr3	1000000	-0.365	0.356643
odPhaVent1.1_Chr3	1100000	0	1
odPhaVent1.1_Chr3	1200000	0.16	0.31968
odPhaVent1.1_Chr3	1300000	0.765	0.356643
odPhaVent1.1_Chr3	1400000	-0.485	0.000999001
odPhaVent1.1_Chr3	1500000	-2.825	0.000999001
odPhaVent1.1_Chr3	1600000	-4.145	0.000999001
odPhaVent1.1_Chr3	1700000	-3.995	0.000999001
odPhaVent1.1_Chr3	1800000	-0.82	0.000999001
odPhaVent1.1_Chr3	1900000	-0.065	0.356643
odPhaVent1.1_Chr3	2000000	3.145	0.000999001
odPhaVent1.1_Chr3	2100000	-1.11	0.31968
odPhaVent1.1_Chr3	2200000	0.135	0.000999001
odPhaVent1.1_Chr3	2300000	1.765	0.000999001
odPhaVent1.1_Chr3	2400000	1.095	0.000999001
odPhaVent1.1_Chr3	2500000	-0.095	0.31968
odPhaVent1.1_Chr3	2600000	0.235	0.31968
odPhaVent1.1_Chr3	2700000	-0.015	0.31968
odPhaVent1.1_Chr3	2800000	1.29	0.000999001
odPhaVent1.1_Chr3	2900000	-1.43	0.000999001
odPhaVent1.1_Chr3	3000000	-3.17	0.000999001
odPhaVent1.1_Chr3	3100000	-4.015	0.000999001
odPhaVent1.1_Chr3	3200000	-1.25	0.000999001
odPhaVent1.1_Chr3	3300000	-1.99	0.000999001
odPhaVent1.1_Chr3	3400000	-1.26	0.31968
odPhaVent1.1_Chr3	3500000	1.135	0.356643
odPhaVent1.1_Chr3	3600000	0.305	0.000999001
odPhaVent1.1_Chr3	3700000	-1.24	0.31968
odPhaVent1.1_Chr3	3800000	-0.85	0.31968
odPhaVent1.1_Chr3	3900000	0.34	0.356643
odPhaVent1.1_Chr3	4000000	3.01	0.000999001
odPhaVent1.1_Chr3	4100000	0.8	0.356643
odPhaVent1.1_Chr3	4200000	-2.845	0.000999001
odPhaVent1.1_Chr3	4300000	-3.245	0.000999001
odPhaVent1.1_Chr3	4400000	0.01	0.356643
odPhaVent1.1_Chr3	4500000	1.82	0.000999001
odPhaVent1.1_Chr3	4600000	1.04	0.000999001
odPhaVent1.1_Chr3	4700000	0.29	0.000999001
odPhaVent1.1_Chr3	4800000	-1.94	0.000999001
odPhaVent1.1_Chr3	4900000	-1.43	0.000999001
odPhaVent1.1_Chr3	5000000	-0.655	0.356643
odPhaVent1.1_Chr3	5100000	-0.11	0.000999001
odPhaVent1.1_Chr3	5200000	-0.915	0.000999001
odPhaVent1.1_Chr3	5300000	-1.32	0.000999001
odPhaVent1.1_Chr3	5400000	-3.19	0.000999001
odPhaVent1.1_Chr3	5500000	-0.625	0.31968
odPhaVent1.1_Chr3	5600000	1.385	0.000999001
odPhaVent1.1_Chr3	5700000	2.605	0.000999001
odPhaVent1.1_Chr3	5800000	-0.025	0.31968
odPhaVent1.1_Chr3	5900000	0.73	0.000999001
odPhaVent1.1_Chr3	6000000	1.365	0.000999001
odPhaVent1.1_Chr3	6100000	0.265	0.31968
odPhaVent1.1_Chr3	6200000	1.685	0.000999001
odPhaVent1.1_Chr3	6300000	1.89	0.31968
odPhaVent1.1_Chr3	6400000	0.555	0.000999001
odPhaVent1.1_Chr3	6500000	-0.495	0.000999001
odPhaVent1.1_Chr3	6600000	1.405	0.31968
odPhaVent1.1_Chr3	6700000	-4.07	0.000999001
odPhaVent1.1_Chr3	6800000	-1.72	0.000999001
odPhaVent1.1_Chr3	6900000	-1.425	0.000999001
odPhaVent1.1_Chr3	7000000	0.985	0.356643
odPhaVent1.1_Chr3	7100000	-3.83	0.000999001
odPhaVent1.1_Chr3	7200000	-0.22	0.356643
odPhaVent1.1_Chr3	7300000	0.145	0.31968
odPhaVent1.1_Chr3	7400000	-1.045	0.000999001
odPhaVent1.1_Chr3	7500000	-0.5	0.000999001
odPhaVent1.1_Chr3	7600000	-1.38	0.000999001
odPhaVent1.1_Chr3	7700000	1.975	0.000999001
odPhaVent1.1_Chr3	7800000	0.815	0.000999001
odPhaVent1.1_Chr3	7900000	-1.575	0.000999001
odPhaVent1.1_Chr3	8000000	0.465	0.000999001
odPhaVent1.1_Chr3	8100000	0.63	0.356643
odPhaVent1.1_Chr3	8200000	-0.93	0.000999001
odPhaVent1.1_Chr3	8300000	-0.705	0.31968
odPhaVent1.1_Chr3	8400000	-1.51	0.000999001
odPhaVent1.1_Chr3	8500000	3.705	0.000999001
odPhaVent1.1_Chr3	8600000	-2.14	0.000999001
odPhaVent1.1_Chr3	8700000	-0.37	0.356643
odPhaVent1.1_Chr3	8800000	-2.085	0.000999001
odPhaVent1.1_Chr3	8900000	-0.425	0.000999001
odPhaVent1.1_Chr3	9000000	-2.205	0.000999001
odPhaVent1.1_Chr3	9100000	-2.785	0.000999001
odPhaVent1.1_Chr3	9200000	0.79	0.356643
odPhaVent1.1_Chr3	9300000	-0.27	0.31968
odPhaVent1.1_Chr4	0	-0.545	0.000999001
odPhaVent1.1_Chr4	100000	-2.275	0.000999001
odPhaVent1.1_Chr4	200000	1.175	0.356643
odPhaVent1.1_Chr4	300000	-0.265	0.000999001
odPhaVent1.1_Chr4	400000	-2.14	0.000999001
odPhaVent1.1_Chr4	500000	0.545	0.31968
odPhaVent1.1_Chr4	600000	1.52	0.000999001
odPhaVent1.1_Chr4	700000	-0.825	0.31968
odPhaVent1.1_Chr4	800000	-1.51	0.000999001
odPhaVent1.1_Chr4	900000	0.895	0.356643
odPhaVent1.1_Chr4	1000000	0.46	0.000999001
odPhaVent1.1_Chr4	1100000	0.535	0.000999001
odPhaVent1.1_Chr4	1200000	1.615	0.000999001
odPhaVent1.1_Chr4	1300000	2.185	0.000999001
odPhaVent1.1_Chr4	1400000	1.315	0.000999001
odPhaVent1.1_Chr4	1500000	-1.2	0.31968
odPhaVent1.1_Chr4	1600000	-2.355	0.000999001
odPhaVent1.1_Chr4	1700000	0.11	0.31968
odPhaVent1.1_Chr4	1800000	-1.37	0.000999001
odPhaVent1.1_Chr4	1900000	0.105	0.000999001
odPhaVent1.1_Chr4	2000000	-0.69	0.000999001
odPhaVent1.1_Chr4	2100000	-1.42	0.000999001
odPhaVent1.1_Chr4	2200000	-1.97	0.000999001
odPhaVent1.1_Chr4	2300000	1.115	0.000999001
odPhaVent1.1_Chr4	2400000	0.24	0.31968
odPhaVent1.1_Chr4	2500000	-2.27	0.000999001
odPhaVent1.1_Chr4	2600000	-2.585	0.000999001
odPhaVent1.1_Chr4	2700000	-1.415	0.000999001
odPhaVent1.1_Chr4	2800000	-0.695	0.31968
odPhaVent1.1_Chr4	2900000	-0.655	0.000999001
odPhaVent1.1_Chr4	3000000	-0.205	0.000999001
odPhaVent1.1_Chr4	3100000	0.245	0.31968
odPhaVent1.1_Chr4	3200000	1.665	0.000999001
odPhaVent1.1_Chr4	3300000	1.85	0.000999001
odPhaVent1.1_Chr4	3400000	0.1	0.356643
odPhaVent1.1_Chr4	3500000	-1.77636e-15	0.31968
odPhaVent1.1_Chr4	3600000	0.045	0.000999001
odPhaVent1.1_Chr4	3700000	-0.02	0.356643
odPhaVent1.1_Chr4	3800000	1.39	0.000999001
odPhaVent1.1_Chr4	3900000	0.695	0.356643
odPhaVent1.1_Chr4	4000000	2.9	0.000999001
odPhaVent1.1_Chr4	4100000	-0.58	0.000999001
odPhaVent1.1_Chr4	4200000	1.075	0.000999001
odPhaVent1.1_Chr4	4300000	-0.05	0.31968
odPhaVent1.1_Chr4	4400000	-0.015	0.356643
odPhaVent1.1_Chr4	4500000	-0.06	0.356643
odPhaVent1.1_Chr4	4600000	-2.395	0.000999001
odPhaVent1.1_Chr4	4700000	-0.9	0.000999001
odPhaVent1.1_Chr4	4800000	-1.775	0.000999001
odPhaVent1.1_Chr4	4900000	-2.135	0.000999001
odPhaVent1.1_Chr4	5000000	-0.655	0.000999001
odPhaVent1.1_Chr4	5100000	-0.305	0.31968
odPhaVent1.1_Chr4	5200000	-0.575	0.000999001
odPhaVent1.1_Chr4	5300000	-2.69	0.000999001
odPhaVent1.1_Chr4	5400000	-3.745	0.000999001
odPhaVent1.1_Chr4	5500000	1.365	0.000999001
odPhaVent1.1_Chr4	5600000	0.635	0.000999001
odPhaVent1.1_Chr4	5700000	-0.04	0.356643
odPhaVent1.1_Chr4	5800000	-0.045	0.356643
odPhaVent1.1_Chr4	5900000	-0.72	0.000999001
odPhaVent1.1_Chr4	6000000	-2.925	0.000999001
odPhaVent1.1_Chr4	6100000	-1.58	0.000999001
odPhaVent1.1_Chr4	6200000	-0.015	0.31968
odPhaVent1.1_Chr4	6300000	-3.51	0.000999001
odPhaVent1.1_Chr4	6400000	-1.755	0.000999001
odPhaVent1.1_Chr4	6500000	0.575	0.000999001
odPhaVent1.1_Chr4	6600000	0.64	0.31968
odPhaVent1.1_Chr4	6700000	-0.5	0.000999001
odPhaVent1.1_Chr4	6800000	-1.155	0.000999001
odPhaVent1.1_Chr4	6900000	-0.715	0.356643
odPhaVent1.1_Chr4	7000000	-0.28	0.000999001
odPhaVent1.1_Chr4	7100000	-0.94	0.356643
odPhaVent1.1_Chr4	7200000	-1.955	0.000999001
odPhaVent1.1_Chr4	7300000	-0.26	0.356643
odPhaVent1.1_Chr4	7400000	-3.11	0.000999001
odPhaVent1.1_Chr4	7500000	-0.105	0.000999001
odPhaVent1.1_Chr4	7600000	-0.025	0.31968
odPhaVent1.1_Chr4	7700000	0.315	0.000999001
odPhaVent1.1_Chr4_unloc_1	0	-0.155	0.000999001
odPhaVent1.1_Chr4_unloc_1	100000	-1.355	0.000999001
odPhaVent1.1_Chr4_unloc_2	0	-0.535	0.000999001
odPhaVent1.1_Chr4_unloc_3	0	-0.37	0.000999001
odPhaVent1.1_Chr4_unloc_4	0	0.035	0.000999001
odPhaVent1.1_Chr5	0	1.285	0.000999001
odPhaVent1.1_Chr5	100000	0.405	0.000999001
odPhaVent1.1_Chr5	200000	-1.23	0.31968
odPhaVent1.1_Chr5	300000	-0.305	0.000999001
odPhaVent1.1_Chr5	400000	-0.685	0.31968
odPhaVent1.1_Chr5	500000	-1.75	0.000999001
odPhaVent1.1_Chr5	600000	-1.575	0.000999001
odPhaVent1.1_Chr5	700000	0.225	0.356643
odPhaVent1.1_Chr5	800000	-0.825	0.356643
odPhaVent1.1_Chr5	900000	0.185	0.356643
odPhaVent1.1_Chr5	1000000	-2.655	0.356643
odPhaVent1.1_Chr5	1100000	-1.155	0.000999001
odPhaVent1.1_Chr5	1200000	-0.8	0.000999001
odPhaVent1.1_Chr5	1300000	0.885	0.000999001
odPhaVent1.1_Chr5	1400000	-0.865	0.000999001
odPhaVent1.1_Chr5	1500000	-0.17	0.356643
odPhaVent1.1_Chr5	1600000	-2.195	0.000999001
odPhaVent1.1_Chr5	1700000	-0.645	0.356643
odPhaVent1.1_Chr5	1800000	0.485	0.000999001
odPhaVent1.1_Chr5	1900000	0.71	0.31968
odPhaVent1.1_Chr5	2000000	-1.885	0.000999001
odPhaVent1.1_Chr5	2100000	-1.71	0.000999001
odPhaVent1.1_Chr5	2200000	0.48	0.000999001
odPhaVent1.1_Chr5	2300000	0.115	0.31968
odPhaVent1.1_Chr5	2400000	0.2	0.31968
odPhaVent1.1_Chr5	2500000	0.555	0.000999001
odPhaVent1.1_Chr5	2600000	4.055	0.000999001
odPhaVent1.1_Chr5	2700000	0.11	0.356643
odPhaVent1.1_Chr5	2800000	0.65	0.000999001
odPhaVent1.1_Chr5	2900000	2.06	0.000999001
odPhaVent1.1_Chr5	3000000	1.755	0.000999001
odPhaVent1.1_Chr5	3100000	0.98	0.000999001
odPhaVent1.1_Chr5	3200000	0.485	0.31968
odPhaVent1.1_Chr5	3300000	-0.045	0.356643
odPhaVent1.1_Chr5	3400000	0.07	0.31968
odPhaVent1.1_Chr5	3500000	0.8	0.31968
odPhaVent1.1_Chr5	3600000	0.655	0.31968
odPhaVent1.1_Chr5	3700000	-0.2	0.000999001
odPhaVent1.1_Chr5	3800000	-1.25	0.000999001
odPhaVent1.1_Chr5	3900000	0.17	0.000999001
odPhaVent1.1_Chr5	4000000	0.35	0.356643
odPhaVent1.1_Chr5	4100000	-0.325	0.000999001
odPhaVent1.1_Chr5	4200000	-0.24	0.000999001
odPhaVent1.1_Chr5	4300000	-0.715	0.000999001
odPhaVent1.1_Chr5	4400000	0.29	0.31968
odPhaVent1.1_Chr5	4500000	-0.685	0.000999001
odPhaVent1.1_Chr5	4600000	-1.135	0.000999001
odPhaVent1.1_Chr5	4700000	-1.86	0.000999001
odPhaVent1.1_Chr5	4800000	0.125	0.31968
odPhaVent1.1_Chr5	4900000	-0.375	0.000999001
odPhaVent1.1_Chr5	5000000	-1.855	0.000999001
odPhaVent1.1_Chr5	5100000	-1.265	0.356643
odPhaVent1.1_Chr5	5200000	1.44	0.000999001
odPhaVent1.1_Chr5	5300000	-1.46	0.31968
odPhaVent1.1_Chr5	5400000	-3.475	0.000999001
odPhaVent1.1_Chr5	5500000	-1.93	0.000999001
odPhaVent1.1_Chr5	5600000	1.685	0.000999001
odPhaVent1.1_Chr5	5700000	-1.015	0.000999001
odPhaVent1.1_Chr5	5800000	0.31	0.000999001
odPhaVent1.1_Chr5	5900000	0.01	0.31968
odPhaVent1.1_Chr5	6000000	0.295	0.31968
odPhaVent1.1_Chr5	6100000	0.235	0.000999001
odPhaVent1.1_Chr5	6200000	-0.085	0.356643
odPhaVent1.1_Chr5	6300000	-1.35	0.000999001
odPhaVent1.1_Chr5	6400000	-1.545	0.000999001
odPhaVent1.1_Chr5	6500000	-2.255	0.000999001
odPhaVent1.1_Chr5	6600000	-1.22	0.000999001
odPhaVent1.1_Chr5	6700000	1.885	0.000999001
odPhaVent1.1_Chr5	6800000	0.54	0.356643
odPhaVent1.1_Chr5	6900000	0.18	0.356643
odPhaVent1.1_Chr5	7000000	-2.09	0.31968
odPhaVent1.1_Chr5	7100000	-0.045	0.31968
odPhaVent1.1_Chr5	7200000	-0.725	0.000999001
odPhaVent1.1_Chr5	7300000	0.295	0.356643
odPhaVent1.1_Chr5	7400000	-0.205	0.000999001
odPhaVent1.1_Chr5	7500000	1.405	0.31968
odPhaVent1.1_Chr5	7600000	0.375	0.000999001
odPhaVent1.1_Chr5_unloc_1	0	4.63	0.000999001
odPhaVent1.1_Chr5_unloc_2	0	0.345	0.000999001
odPhaVent1.1_Chr5_unloc_3	0	-0.845	0.000999001
odPhaVent1.1_Chr5_unloc_4	0	-0.215	0.31968
odPhaVent1.1_Chr5_unloc_5	0	-0.895	0.000999001
odPhaVent1.1_Chr5_unloc_6	0	0.495	0.000999001
odPhaVent1.1_Chr6	0	0.695	0.356643
odPhaVent1.1_Chr6	100000	-1.68	0.000999001
odPhaVent1.1_Chr6	200000	0.075	0.31968
odPhaVent1.1_Chr6	300000	0.36	0.000999001
odPhaVent1.1_Chr6	400000	-0.32	0.31968
odPhaVent1.1_Chr6	500000	-1.445	0.000999001
odPhaVent1.1_Chr6	600000	1.935	0.356643
odPhaVent1.1_Chr6	700000	-0.585	0.31968
odPhaVent1.1_Chr6	800000	0.115	0.31968
odPhaVent1.1_Chr6	900000	-4.175	0.000999001
odPhaVent1.1_Chr6	1000000	-2.155	0.000999001
odPhaVent1.1_Chr6	1100000	-0.39	0.000999001
odPhaVent1.1_Chr6	1200000	-0.235	0.31968
odPhaVent1.1_Chr6	1300000	1.21	0.000999001
odPhaVent1.1_Chr6	1400000	-0.59	0.000999001
odPhaVent1.1_Chr6	1500000	1.035	0.356643
odPhaVent1.1_Chr6	1600000	-0.17	0.000999001
odPhaVent1.1_Chr6	1700000	-3.58	0.000999001
odPhaVent1.1_Chr6	1800000	0.14	0.31968
odPhaVent1.1_Chr6	1900000	0.285	0.31968
odPhaVent1.1_Chr6	2000000	0.79	0.000999001
odPhaVent1.1_Chr6	2100000	-1.415	0.000999001
odPhaVent1.1_Chr6	2200000	-0.37	0.000999001
odPhaVent1.1_Chr6	2300000	-1.045	0.000999001
odPhaVent1.1_Chr6	2400000	-1.72	0.000999001
odPhaVent1.1_Chr6	2500000	-6.3	0.000999001
odPhaVent1.1_Chr6	2600000	-2.885	0.000999001
odPhaVent1.1_Chr6	2700000	-1.66	0.000999001
odPhaVent1.1_Chr6	2800000	-3.15	0.000999001
odPhaVent1.1_Chr6	2900000	1.7	0.000999001
odPhaVent1.1_Chr6	3000000	0.69	0.000999001
odPhaVent1.1_Chr6	3100000	-0.025	0.31968
odPhaVent1.1_Chr6	3200000	-0.465	0.000999001
odPhaVent1.1_Chr6	3300000	-0.205	0.31968
odPhaVent1.1_Chr6	3400000	-0.335	0.000999001
odPhaVent1.1_Chr6	3500000	1.495	0.000999001
odPhaVent1.1_Chr6	3600000	1.705	0.000999001
odPhaVent1.1_Chr6	3700000	1.11	0.356643
odPhaVent1.1_Chr6	3800000	-2.03	0.000999001
odPhaVent1.1_Chr6	3900000	1.48	0.000999001
odPhaVent1.1_Chr6	4000000	-3.05	0.000999001
odPhaVent1.1_Chr6	4100000	1.12	0.000999001
odPhaVent1.1_Chr6	4200000	-0.465	0.000999001
odPhaVent1.1_Chr6	4300000	1.48	0.000999001
odPhaVent1.1_Chr6	4400000	-0.02	0.356643
odPhaVent1.1_Chr6	4500000	0.4	0.31968
odPhaVent1.1_Chr6	4600000	-1.265	0.000999001
odPhaVent1.1_Chr6	4700000	0.545	0.000999001
odPhaVent1.1_Chr6	4800000	-1.605	0.000999001
odPhaVent1.1_Chr6	4900000	-1.08	0.000999001
odPhaVent1.1_Chr6	5000000	-0.25	0.356643
odPhaVent1.1_Chr6	5100000	-0.785	0.000999001
odPhaVent1.1_Chr6	5200000	-1.55	0.000999001
odPhaVent1.1_Chr6	5300000	1.37	0.000999001
odPhaVent1.1_Chr6	5400000	-0.3	0.000999001
odPhaVent1.1_Chr6	5500000	-3.33	0.000999001
odPhaVent1.1_Chr6	5600000	0.77	0.000999001
odPhaVent1.1_Chr6	5700000	-1.81	0.000999001
odPhaVent1.1_Chr6	5800000	-1.27	0.000999001
odPhaVent1.1_Chr6	5900000	-0.09	0.356643
odPhaVent1.1_Chr6	6000000	-1.905	0.000999001
odPhaVent1.1_Chr6	6100000	1.245	0.000999001
odPhaVent1.1_Chr6	6200000	-0.745	0.000999001
odPhaVent1.1_Chr6	6300000	-0.26	0.000999001
odPhaVent1.1_Chr6	6400000	-1.405	0.000999001
odPhaVent1.1_Chr6	6500000	0.75	0.000999001
odPhaVent1.1_Chr6	6600000	0.085	0.31968
odPhaVent1.1_Chr6	6700000	-0.82	0.356643
odPhaVent1.1_Chr6	6800000	-0.51	0.356643
odPhaVent1.1_Chr6	6900000	1.72	0.000999001
odPhaVent1.1_Chr6	7000000	-2.22	0.000999001
odPhaVent1.1_Chr6	7100000	-2.385	0.000999001
odPhaVent1.1_Chr6	7200000	0.545	0.000999001
odPhaVent1.1_Chr6	7300000	0.325	0.000999001
odPhaVent1.1_Chr6	7400000	0.56	0.000999001
odPhaVent1.1_Chr6	7500000	-0.65	0.000999001
odPhaVent1.1_Chr6	7600000	2.595	0.000999001
odPhaVent1.1_Chr6	7700000	-0.465	0.000999001
odPhaVent1.1_Chr6	7800000	2.585	0.000999001
odPhaVent1.1_Chr6	7900000	0.81	0.000999001
odPhaVent1.1_Chr7	0	-0.13	0.000999001
odPhaVent1.1_Chr7	100000	0.325	0.000999001
odPhaVent1.1_Chr7	200000	0.74	0.356643
odPhaVent1.1_Chr7	300000	-2.315	0.000999001
odPhaVent1.1_Chr7	400000	0.145	0.356643
odPhaVent1.1_Chr7	500000	-1.05	0.000999001
odPhaVent1.1_Chr7	600000	-2.15	0.000999001
odPhaVent1.1_Chr7	700000	0.34	0.000999001
odPhaVent1.1_Chr7	800000	-0.1	0.356643
odPhaVent1.1_Chr7	900000	0.905	0.000999001
odPhaVent1.1_Chr7	1000000	-2.24	0.000999001
odPhaVent1.1_Chr7	1100000	1.785	0.000999001
odPhaVent1.1_Chr7	1200000	2.96	0.000999001
odPhaVent1.1_Chr7	1300000	-0.145	0.356643
odPhaVent1.1_Chr7	1400000	-4.155	0.000999001
odPhaVent1.1_Chr7	1500000	-0.655	0.000999001
odPhaVent1.1_Chr7	1600000	1.535	0.000999001
odPhaVent1.1_Chr7	1700000	-2.585	0.000999001
odPhaVent1.1_Chr7	1800000	0.345	0.356643
odPhaVent1.1_Chr7	1900000	-1.68	0.000999001
odPhaVent1.1_Chr7	2000000	0.095	0.356643
odPhaVent1.1_Chr7	2100000	0.145	0.31968
odPhaVent1.1_Chr7	2200000	-1.495	0.000999001
odPhaVent1.1_Chr7	2300000	0.39	0.000999001
odPhaVent1.1_Chr7	2400000	-0.695	0.000999001
odPhaVent1.1_Chr7	2500000	-0.085	0.31968
odPhaVent1.1_Chr7	2600000	-1.07	0.000999001
odPhaVent1.1_Chr7	2700000	-0.51	0.000999001
odPhaVent1.1_Chr7	2800000	-4.035	0.000999001
odPhaVent1.1_Chr7	2900000	-1.875	0.000999001
odPhaVent1.1_Chr7	3000000	-7.11	0.000999001
odPhaVent1.1_Chr7	3100000	-5.445	0.000999001
odPhaVent1.1_Chr7	3200000	-1.95	0.000999001
odPhaVent1.1_Chr7	3300000	-2.565	0.000999001
odPhaVent1.1_Chr7	3400000	-1.49	0.000999001
odPhaVent1.1_Chr7	3500000	0.15	0.31968
odPhaVent1.1_Chr7	3600000	-1.44	0.000999001
odPhaVent1.1_Chr7	3700000	-3.72	0.000999001
odPhaVent1.1_Chr7	3800000	1.57	0.31968
odPhaVent1.1_Chr7	3900000	-0.755	0.356643
odPhaVent1.1_Chr7	4000000	-0.53	0.000999001
odPhaVent1.1_Chr7	4100000	2.19	0.000999001
odPhaVent1.1_Chr7	4200000	1.835	0.000999001
odPhaVent1.1_Chr7	4300000	1.46	0.31968
odPhaVent1.1_Chr7	4400000	-0.13	0.31968
odPhaVent1.1_Chr7	4500000	-0.045	0.31968
odPhaVent1.1_Chr7	4600000	-0.075	0.356643
odPhaVent1.1_Chr7	4700000	-0.595	0.000999001
odPhaVent1.1_Chr7	4800000	-1.735	0.000999001
odPhaVent1.1_Chr7	4900000	1.115	0.000999001
odPhaVent1.1_Chr7	5000000	-1.665	0.000999001
odPhaVent1.1_Chr7	5100000	2.7	0.000999001
odPhaVent1.1_Chr7	5200000	0.655	0.000999001
odPhaVent1.1_Chr7	5300000	-0.72	0.000999001
odPhaVent1.1_Chr7	5400000	0.2	0.31968
odPhaVent1.1_Chr7	5500000	-0.31	0.000999001
odPhaVent1.1_Chr7	5600000	-1.63	0.000999001
odPhaVent1.1_Chr7	5700000	-0.865	0.000999001
odPhaVent1.1_Chr7	5800000	-0.63	0.31968
odPhaVent1.1_Chr7	5900000	-1.76	0.000999001
odPhaVent1.1_Chr7	6000000	0.3	0.000999001
odPhaVent1.1_Chr7	6100000	-0.64	0.31968
odPhaVent1.1_Chr7	6200000	-0.005	0.31968
odPhaVent1.1_Chr7	6300000	1.42	0.000999001
odPhaVent1.1_Chr7	6400000	-1.065	0.000999001
odPhaVent1.1_Chr7	6500000	-2.275	0.000999001
odPhaVent1.1_Chr7	6600000	-1.9	0.000999001
odPhaVent1.1_Chr7	6700000	-2.85	0.000999001
odPhaVent1.1_Chr7	6800000	1.1	0.31968
odPhaVent1.1_Chr7	6900000	1.51	0.000999001
odPhaVent1.1_Chr7	7000000	1.915	0.000999001
odPhaVent1.1_Chr7	7100000	-0.02	0.356643
odPhaVent1.1_Chr7	7200000	-1.295	0.000999001
odPhaVent1.1_Chr7	7300000	-0.215	0.000999001
odPhaVent1.1_Chr7	7400000	-2.555	0.000999001
odPhaVent1.1_Chr7	7500000	0.47	0.31968
odPhaVent1.1_Chr7	7600000	-0.5	0.000999001
odPhaVent1.1_Chr7	7700000	0.99	0.356643
odPhaVent1.1_Chr7	7800000	-0.065	0.000999001
odPhaVent1.1_Chr8	0	1.24	0.000999001
odPhaVent1.1_Chr8	100000	1.565	0.000999001
odPhaVent1.1_Chr8	200000	0.115	0.31968
odPhaVent1.1_Chr8	300000	-0.43	0.356643
odPhaVent1.1_Chr8	400000	-0.275	0.31968
odPhaVent1.1_Chr8	500000	-0.68	0.000999001
odPhaVent1.1_Chr8	600000	1.075	0.000999001
odPhaVent1.1_Chr8	700000	-0.955	0.000999001
odPhaVent1.1_Chr8	800000	-0.52	0.000999001
odPhaVent1.1_Chr8	900000	1.51	0.000999001
odPhaVent1.1_Chr8	1000000	-0.39	0.000999001
odPhaVent1.1_Chr8	1100000	0.855	0.000999001
odPhaVent1.1_Chr8	1200000	-2.005	0.000999001
odPhaVent1.1_Chr8	1300000	-1.405	0.000999001
odPhaVent1.1_Chr8	1400000	-0.12	0.31968
odPhaVent1.1_Chr8	1500000	-0.44	0.356643
odPhaVent1.1_Chr8	1600000	-1.275	0.000999001
odPhaVent1.1_Chr8	1700000	-0.86	0.000999001
odPhaVent1.1_Chr8	1800000	0.255	0.000999001
odPhaVent1.1_Chr8	1900000	-0.06	0.31968
odPhaVent1.1_Chr8	2000000	3.31	0.000999001
odPhaVent1.1_Chr8	2100000	-2.81	0.000999001
odPhaVent1.1_Chr8	2200000	0.73	0.000999001
odPhaVent1.1_Chr8	2300000	0.755	0.000999001
odPhaVent1.1_Chr8	2400000	-0.675	0.000999001
odPhaVent1.1_Chr8	2500000	0.74	0.000999001
odPhaVent1.1_Chr8	2600000	1.525	0.000999001
odPhaVent1.1_Chr8	2700000	0.2	0.000999001
odPhaVent1.1_Chr8	2800000	0.735	0.000999001
odPhaVent1.1_Chr8	2900000	-0.59	0.000999001
odPhaVent1.1_Chr8	3000000	-1.9	0.000999001
odPhaVent1.1_Chr8	3100000	-2.975	0.000999001
odPhaVent1.1_Chr8	3200000	-0.035	0.356643
odPhaVent1.1_Chr8	3300000	-0.29	0.356643
odPhaVent1.1_Chr8	3400000	0.61	0.356643
odPhaVent1.1_Chr8	3500000	0.795	0.000999001
odPhaVent1.1_Chr8	3600000	0.69	0.000999001
odPhaVent1.1_Chr8	3700000	0.325	0.31968
odPhaVent1.1_Chr8	3800000	-0.77	0.356643
odPhaVent1.1_Chr8	3900000	-1.735	0.000999001
odPhaVent1.1_Chr8	4000000	-1.36	0.31968
odPhaVent1.1_Chr8	4100000	0.22	0.356643
odPhaVent1.1_Chr8	4200000	4.855	0.356643
odPhaVent1.1_Chr8	4300000	0.3	0.31968
odPhaVent1.1_Chr8	4400000	2.495	0.000999001
odPhaVent1.1_Chr8	4500000	0.71	0.000999001
odPhaVent1.1_Chr8	4600000	-0.175	0.356643
odPhaVent1.1_Chr8	4700000	0.155	0.000999001
odPhaVent1.1_Chr8	4800000	-0.09	0.31968
odPhaVent1.1_Chr8	4900000	0.475	0.000999001
odPhaVent1.1_Chr8	5000000	-2.57	0.000999001
odPhaVent1.1_Chr8	5100000	-3.305	0.000999001
odPhaVent1.1_Chr8	5200000	-2.875	0.000999001
odPhaVent1.1_Chr8	5300000	-1.105	0.31968
odPhaVent1.1_Chr8	5400000	-1.65	0.000999001
odPhaVent1.1_Chr8	5500000	-2.455	0.000999001
odPhaVent1.1_Chr8	5600000	-5.315	0.000999001
odPhaVent1.1_Chr8	5700000	-5.565	0.000999001
odPhaVent1.1_Chr8	5800000	-1.125	0.000999001
odPhaVent1.1_Chr8	5900000	-0.805	0.000999001
odPhaVent1.1_Chr8	6000000	2.76	0.000999001
odPhaVent1.1_Chr8	6100000	1.625	0.000999001
odPhaVent1.1_Chr8	6200000	-1.4	0.000999001
odPhaVent1.1_Chr8	6300000	-0.795	0.000999001
odPhaVent1.1_Chr8	6400000	0.435	0.000999001
odPhaVent1.1_Chr8	6500000	2.13	0.000999001
odPhaVent1.1_Chr8	6600000	-1.44	0.000999001
odPhaVent1.1_Chr8	6700000	3.515	0.000999001
odPhaVent1.1_Chr8	6800000	-2.94	0.000999001
odPhaVent1.1_Chr8	6900000	1.285	0.000999001
odPhaVent1.1_Chr8	7000000	-2.52	0.000999001
odPhaVent1.1_Chr8	7100000	0.565	0.31968
odPhaVent1.1_Chr8	7200000	1.235	0.000999001
odPhaVent1.1_Chr8	7300000	-0.645	0.000999001
odPhaVent1.1_Chr8	7400000	0.11	0.356643
odPhaVent1.1_Chr8	7500000	0.265	0.000999001
odPhaVent1.1_Chr9	0	-0.695	0.000999001
odPhaVent1.1_Chr9	100000	-2.855	0.000999001
odPhaVent1.1_Chr9	200000	0.355	0.31968
odPhaVent1.1_Chr9	300000	2.21	0.000999001
odPhaVent1.1_Chr9	400000	-2.355	0.000999001
odPhaVent1.1_Chr9	500000	0.27	0.000999001
odPhaVent1.1_Chr9	600000	-0.4	0.000999001
odPhaVent1.1_Chr9	700000	-2.945	0.000999001
odPhaVent1.1_Chr9	800000	-2.105	0.000999001
odPhaVent1.1_Chr9	900000	-1.375	0.000999001
odPhaVent1.1_Chr9	1000000	0.975	0.000999001
odPhaVent1.1_Chr9	1100000	-0.595	0.000999001
odPhaVent1.1_Chr9	1200000	-0.115	0.31968
odPhaVent1.1_Chr9	1300000	-1.415	0.000999001
odPhaVent1.1_Chr9	1400000	-0.685	0.356643
odPhaVent1.1_Chr9	1500000	-2.96	0.000999001
odPhaVent1.1_Chr9	1600000	-1.15	0.000999001
odPhaVent1.1_Chr9	1700000	0.505	0.356643
odPhaVent1.1_Chr9	1800000	2.265	0.000999001
odPhaVent1.1_Chr9	1900000	1.905	0.000999001
odPhaVent1.1_Chr9	2000000	0.125	0.31968
odPhaVent1.1_Chr9	2100000	-1.015	0.356643
odPhaVent1.1_Chr9	2200000	-3.8	0.000999001
odPhaVent1.1_Chr9	2300000	-0.475	0.356643
odPhaVent1.1_Chr9	2400000	-3.14	0.000999001
odPhaVent1.1_Chr9	2500000	-0.18	0.356643
odPhaVent1.1_Chr9	2600000	-0.365	0.000999001
odPhaVent1.1_Chr9	2700000	-0.25	0.31968
odPhaVent1.1_Chr9	2800000	1.335	0.000999001
odPhaVent1.1_Chr9	2900000	1.515	0.000999001
odPhaVent1.1_Chr9	3000000	2.425	0.000999001
odPhaVent1.1_Chr9	3100000	0.535	0.000999001
odPhaVent1.1_Chr9	3200000	-3.015	0.000999001
odPhaVent1.1_Chr9	3300000	-1.23	0.000999001
odPhaVent1.1_Chr9	3400000	1.615	0.000999001
odPhaVent1.1_Chr9	3500000	0.49	0.356643
odPhaVent1.1_Chr9	3600000	-0.815	0.31968
odPhaVent1.1_Chr9	3700000	-0.37	0.31968
odPhaVent1.1_Chr9	3800000	0.98	0.000999001
odPhaVent1.1_Chr9	3900000	-2.325	0.000999001
odPhaVent1.1_Chr9	4000000	-1.8	0.000999001
odPhaVent1.1_Chr9	4100000	0.375	0.000999001
odPhaVent1.1_Chr9	4200000	0.66	0.000999001
odPhaVent1.1_Chr9	4300000	0.745	0.000999001
odPhaVent1.1_Chr9	4400000	-1.89	0.000999001
odPhaVent1.1_Chr9	4500000	0.025	0.31968
odPhaVent1.1_Chr9	4600000	-0.89	0.31968
odPhaVent1.1_Chr9	4700000	-2.94	0.000999001
odPhaVent1.1_Chr9	4800000	-0.705	0.000999001
odPhaVent1.1_Chr9	4900000	-0.975	0.000999001
odPhaVent1.1_Chr9	5000000	1.735	0.000999001
odPhaVent1.1_Chr9	5100000	0.745	0.000999001
odPhaVent1.1_Chr9	5200000	1.485	0.000999001
odPhaVent1.1_Chr9	5300000	-1.36	0.000999001
odPhaVent1.1_Chr9	5400000	-1.49	0.356643
odPhaVent1.1_Chr9	5500000	1.005	0.000999001
odPhaVent1.1_Chr9	5600000	-1.195	0.000999001
odPhaVent1.1_Chr9	5700000	-0.835	0.000999001
odPhaVent1.1_Chr9	5800000	-0.53	0.000999001
odPhaVent1.1_Chr9	5900000	-0.39	0.31968
odPhaVent1.1_Chr9	6000000	-1.775	0.31968
odPhaVent1.1_Chr9	6100000	-0.46	0.000999001
odPhaVent1.1_Chr9	6200000	-1.45	0.000999001
odPhaVent1.1_Chr9	6300000	1.29	0.000999001
odPhaVent1.1_Chr9	6400000	0.685	0.356643
odPhaVent1.1_Chr9	6500000	1.02	0.000999001
odPhaVent1.1_Chr9	6600000	0.93	0.000999001
odPhaVent1.1_Chr9	6700000	0.42	0.31968
odPhaVent1.1_Chr9	6800000	0.175	0.000999001
odPhaVent1.1_Chr9	6900000	-0.485	0.000999001
odPhaVent1.1_Chr9	7000000	-0.1	0.31968
odPhaVent1.1_Chr9	7100000	0.2	0.31968
odPhaVent1.1_Chr9_unloc_1	0	-1.325	0.000999001
odPhaVent1.1_Chr9_unloc_2	0	-1.045	0.000999001
odPhaVent1.1_Chr9_unloc_3	0	0.075	0.000999001
odPhaVent1.1_Chr10	0	0.25	0.356643
odPhaVent1.1_Chr10	100000	0.76	0.000999001
odPhaVent1.1_Chr10	200000	-1.125	0.000999001
odPhaVent1.1_Chr10	300000	-0.46	0.356643
odPhaVent1.1_Chr10	400000	2.665	0.000999001
odPhaVent1.1_Chr10	500000	0.82	0.000999001
odPhaVent1.1_Chr10	600000	1.745	0.000999001
odPhaVent1.1_Chr10	700000	1.065	0.000999001
odPhaVent1.1_Chr10	800000	1.255	0.000999001
odPhaVent1.1_Chr10	900000	1.265	0.000999001
odPhaVent1.1_Chr10	1000000	-2.49	0.000999001
odPhaVent1.1_Chr10	1100000	-1.5	0.000999001
odPhaVent1.1_Chr10	1200000	1.725	0.000999001
odPhaVent1.1_Chr10	1300000	1.81	0.000999001
odPhaVent1.1_Chr10	1400000	-2.625	0.000999001
odPhaVent1.1_Chr10	1500000	-0.555	0.356643
odPhaVent1.1_Chr10	1600000	-1.225	0.000999001
odPhaVent1.1_Chr10	1700000	0.35	0.000999001
odPhaVent1.1_Chr10	1800000	-0.295	0.31968
odPhaVent1.1_Chr10	1900000	-0.485	0.356643
odPhaVent1.1_Chr10	2000000	-0.93	0.000999001
odPhaVent1.1_Chr10	2100000	-0.685	0.356643
odPhaVent1.1_Chr10	2200000	-0.6	0.356643
odPhaVent1.1_Chr10	2300000	-1.59	0.000999001
odPhaVent1.1_Chr10	2400000	0.245	0.356643
odPhaVent1.1_Chr10	2500000	-1.28	0.000999001
odPhaVent1.1_Chr10	2600000	-0.37	0.000999001
odPhaVent1.1_Chr10	2700000	-0.13	0.31968
odPhaVent1.1_Chr10	2800000	-1.18	0.000999001
odPhaVent1.1_Chr10	2900000	-1.35	0.000999001
odPhaVent1.1_Chr10	3000000	0.055	0.356643
odPhaVent1.1_Chr10	3100000	1.325	0.000999001
odPhaVent1.1_Chr10	3200000	-1.77	0.000999001
odPhaVent1.1_Chr10	3300000	-0.54	0.000999001
odPhaVent1.1_Chr10	3400000	-0.61	0.000999001
odPhaVent1.1_Chr10	3500000	-0.095	0.356643
odPhaVent1.1_Chr10	3600000	1.215	0.000999001
odPhaVent1.1_Chr10	3700000	1.805	0.000999001
odPhaVent1.1_Chr10	3800000	-1.1	0.000999001
odPhaVent1.1_Chr10	3900000	-2.88	0.000999001
odPhaVent1.1_Chr10	4000000	0.635	0.000999001
odPhaVent1.1_Chr10	4100000	0.865	0.000999001
odPhaVent1.1_Chr10	4200000	-0.845	0.31968
odPhaVent1.1_Chr10	4300000	0.635	0.356643
odPhaVent1.1_Chr10	4400000	-0.28	0.31968
odPhaVent1.1_Chr10	4500000	-0.465	0.31968
odPhaVent1.1_Chr10	4600000	-1.72	0.000999001
odPhaVent1.1_Chr10	4700000	-1.96	0.31968
odPhaVent1.1_Chr10	4800000	0.565	0.000999001
odPhaVent1.1_Chr10	4900000	-0.195	0.31968
odPhaVent1.1_Chr10	5000000	-0.65	0.000999001
odPhaVent1.1_Chr10	5100000	-1.03	0.000999001
odPhaVent1.1_Chr10	5200000	-1.12	0.000999001
odPhaVent1.1_Chr10	5300000	8.12	0.000999001
odPhaVent1.1_Chr10	5400000	-3.035	0.000999001
odPhaVent1.1_Chr10	5500000	-0.565	0.000999001
odPhaVent1.1_Chr10	5600000	-0.945	0.000999001
odPhaVent1.1_Chr10	5700000	-0.57	0.000999001
odPhaVent1.1_Chr10	5800000	-1.645	0.31968
odPhaVent1.1_Chr10	5900000	-1.4	0.000999001
odPhaVent1.1_Chr10	6000000	-1.21	0.000999001
odPhaVent1.1_Chr10	6100000	0.055	0.356643
odPhaVent1.1_Chr10	6200000	-0.58	0.31968
odPhaVent1.1_Chr10	6300000	0.34	0.000999001
odPhaVent1.1_Chr10	6400000	-0.465	0.000999001
odPhaVent1.1_Chr10	6500000	-0.255	0.000999001
odPhaVent1.1_Chr10	6600000	1.235	0.000999001
odPhaVent1.1_Chr10	6700000	0.185	0.000999001
odPhaVent1.1_Chr10	6800000	1.61	0.000999001
odPhaVent1.1_Chr10	6900000	1.325	0.000999001
odPhaVent1.1_Chr10	7000000	0.39	0.000999001
odPhaVent1.1_Chr10_unloc_1	0	0.07	0.000999001
odPhaVent1.1_Chr11	0	0.045	0.356643
odPhaVent1.1_Chr11	100000	0.245	0.356643
odPhaVent1.1_Chr11	200000	1.34	0.000999001
odPhaVent1.1_Chr11	300000	1.365	0.000999001
odPhaVent1.1_Chr11	400000	0.39	0.356643
odPhaVent1.1_Chr11	500000	0.55	0.000999001
odPhaVent1.1_Chr11	600000	0.175	0.356643
odPhaVent1.1_Chr11	700000	0.67	0.356643
odPhaVent1.1_Chr11	800000	-2.35	0.000999001
odPhaVent1.1_Chr11	900000	0.105	0.31968
odPhaVent1.1_Chr11	1000000	0.86	0.000999001
odPhaVent1.1_Chr11	1100000	5.29	0.000999001
odPhaVent1.1_Chr11	1200000	-1.065	0.31968
odPhaVent1.1_Chr11	1300000	2.265	0.000999001
odPhaVent1.1_Chr11	1400000	-0.33	0.000999001
odPhaVent1.1_Chr11	1500000	0.65	0.356643
odPhaVent1.1_Chr11	1600000	-1.29	0.356643
odPhaVent1.1_Chr11	1700000	-0.655	0.356643
odPhaVent1.1_Chr11	1800000	-0.455	0.000999001
odPhaVent1.1_Chr11	1900000	-1.305	0.000999001
odPhaVent1.1_Chr11	2000000	-2.545	0.000999001
odPhaVent1.1_Chr11	2100000	-0.16	0.356643
odPhaVent1.1_Chr11	2200000	-1.025	0.000999001
odPhaVent1.1_Chr11	2300000	-0.02	0.31968
odPhaVent1.1_Chr11	2400000	-1.995	0.000999001
odPhaVent1.1_Chr11	2500000	-0.18	0.000999001
odPhaVent1.1_Chr11	2600000	1.2	0.000999001
odPhaVent1.1_Chr11	2700000	-0.04	0.356643
odPhaVent1.1_Chr11	2800000	0.125	0.31968
odPhaVent1.1_Chr11	2900000	0.645	0.000999001
odPhaVent1.1_Chr11	3000000	-0.39	0.000999001
odPhaVent1.1_Chr11	3100000	-1.01	0.000999001
odPhaVent1.1_Chr11	3200000	0.095	0.000999001
odPhaVent1.1_Chr11	3300000	2.165	0.000999001
odPhaVent1.1_Chr11	3400000	-3.255	0.000999001
odPhaVent1.1_Chr11	3500000	-0.805	0.000999001
odPhaVent1.1_Chr11	3600000	1.835	0.000999001
odPhaVent1.1_Chr11	3700000	0.355	0.356643
odPhaVent1.1_Chr11	3800000	-0.205	0.000999001
odPhaVent1.1_Chr11	3900000	-2.22	0.000999001
odPhaVent1.1_Chr11	4000000	-0.84	0.000999001
odPhaVent1.1_Chr11	4100000	0.305	0.000999001
odPhaVent1.1_Chr11	4200000	-2.52	0.000999001
odPhaVent1.1_Chr11	4300000	-0.55	0.31968
odPhaVent1.1_Chr11	4400000	0.97	0.000999001
odPhaVent1.1_Chr11	4500000	-3.695	0.000999001
odPhaVent1.1_Chr11	4600000	0.395	0.31968
odPhaVent1.1_Chr11	4700000	3.21	0.000999001
odPhaVent1.1_Chr11	4800000	0.56	0.31968
odPhaVent1.1_Chr11	4900000	-0.84	0.000999001
odPhaVent1.1_Chr11	5000000	0.04	0.31968
odPhaVent1.1_Chr11	5100000	-1.01	0.000999001
odPhaVent1.1_Chr11	5200000	-1.57	0.31968
odPhaVent1.1_Chr11	5300000	-1.06	0.000999001
odPhaVent1.1_Chr11	5400000	-2.52	0.000999001
odPhaVent1.1_Chr11	5500000	-0.11	0.000999001
odPhaVent1.1_Chr11	5600000	-0.13	0.356643
odPhaVent1.1_Chr11	5700000	0.28	0.356643
odPhaVent1.1_Chr11	5800000	0.575	0.356643
odPhaVent1.1_Chr11	5900000	0.485	0.000999001
odPhaVent1.1_Chr11	6000000	-1.255	0.000999001
odPhaVent1.1_Chr11	6100000	-0.615	0.000999001
odPhaVent1.1_Chr11	6200000	0.645	0.000999001
odPhaVent1.1_Chr11	6300000	-2.65	0.000999001
odPhaVent1.1_Chr11	6400000	-2.86	0.000999001
odPhaVent1.1_Chr11	6500000	-2.465	0.000999001
odPhaVent1.1_Chr11	6600000	-3.54	0.000999001
odPhaVent1.1_Chr11	6700000	-0.815	0.000999001
odPhaVent1.1_Chr11	6800000	-4.71	0.000999001
odPhaVent1.1_Chr11	6900000	-3.005	0.000999001
odPhaVent1.1_Chr11	7000000	-1.065	0.000999001
odPhaVent1.1_Chr12	0	-0.01	0.356643
odPhaVent1.1_Chr12	100000	-0.02	0.356643
odPhaVent1.1_Chr12	200000	1.265	0.31968
odPhaVent1.1_Chr12	300000	-1.455	0.000999001
odPhaVent1.1_Chr12	400000	-1.3	0.356643
odPhaVent1.1_Chr12	500000	-0.35	0.000999001
odPhaVent1.1_Chr12	600000	-2.595	0.000999001
odPhaVent1.1_Chr12	700000	-1.22	0.000999001
odPhaVent1.1_Chr12	800000	-0.5	0.000999001
odPhaVent1.1_Chr12	900000	-1.905	0.000999001
odPhaVent1.1_Chr12	1000000	-0.945	0.000999001
odPhaVent1.1_Chr12	1100000	1.93	0.000999001
odPhaVent1.1_Chr12	1200000	-1.83	0.000999001
odPhaVent1.1_Chr12	1300000	-1.47	0.000999001
odPhaVent1.1_Chr12	1400000	-0.33	0.000999001
odPhaVent1.1_Chr12	1500000	-2.72	0.000999001
odPhaVent1.1_Chr12	1600000	-0.74	0.000999001
odPhaVent1.1_Chr12	1700000	-1.24	0.000999001
odPhaVent1.1_Chr12	1800000	-0.675	0.000999001
odPhaVent1.1_Chr12	1900000	-0.105	0.000999001
odPhaVent1.1_Chr12	2000000	0.425	0.356643
odPhaVent1.1_Chr12	2100000	-0.675	0.356643
odPhaVent1.1_Chr12	2200000	1.23	0.000999001
odPhaVent1.1_Chr12	2300000	1.595	0.000999001
odPhaVent1.1_Chr12	2400000	2.14	0.000999001
odPhaVent1.1_Chr12	2500000	-0.025	0.31968
odPhaVent1.1_Chr12	2600000	0.185	0.356643
odPhaVent1.1_Chr12	2700000	-1.795	0.000999001
odPhaVent1.1_Chr12	2800000	-3.135	0.000999001
odPhaVent1.1_Chr12	2900000	-1.915	0.000999001
odPhaVent1.1_Chr12	3000000	0.89	0.000999001
odPhaVent1.1_Chr12	3100000	0.205	0.31968
odPhaVent1.1_Chr12	3200000	5.015	0.000999001
odPhaVent1.1_Chr12	3300000	1.785	0.000999001
odPhaVent1.1_Chr12	3400000	-0.7	0.31968
odPhaVent1.1_Chr12	3500000	-0.19	0.000999001
odPhaVent1.1_Chr12	3600000	0.59	0.356643
odPhaVent1.1_Chr12	3700000	2.14	0.000999001
odPhaVent1.1_Chr12	3800000	-2.72	0.000999001
odPhaVent1.1_Chr12	3900000	-3.125	0.000999001
odPhaVent1.1_Chr12	4000000	-3.38	0.000999001
odPhaVent1.1_Chr12	4100000	-4.79	0.000999001
odPhaVent1.1_Chr12	4200000	-4.575	0.000999001
odPhaVent1.1_Chr12	4300000	-2.985	0.000999001
odPhaVent1.1_Chr12	4400000	-3.25	0.000999001
odPhaVent1.1_Chr12	4500000	-1.09	0.000999001
odPhaVent1.1_Chr12	4600000	-3.745	0.000999001
odPhaVent1.1_Chr12	4700000	-5.24	0.000999001
odPhaVent1.1_Chr12	4800000	-1.71	0.000999001
odPhaVent1.1_Chr12	4900000	-1.03	0.000999001
odPhaVent1.1_Chr12	5000000	-1.97	0.000999001
odPhaVent1.1_Chr12	5100000	-0.245	0.31968
odPhaVent1.1_Chr12	5200000	-1.925	0.000999001
odPhaVent1.1_Chr12	5300000	-3.305	0.000999001
odPhaVent1.1_Chr12	5400000	-0.95	0.000999001
odPhaVent1.1_Chr12	5500000	-1.855	0.31968
odPhaVent1.1_Chr12	5600000	-2.48	0.31968
odPhaVent1.1_Chr12	5700000	-2.305	0.000999001
odPhaVent1.1_Chr12	5800000	0.12	0.31968
odPhaVent1.1_Chr12	5900000	-0.24	0.000999001
odPhaVent1.1_Chr12	6000000	-0.43	0.000999001
odPhaVent1.1_Chr12	6100000	0.98	0.31968
odPhaVent1.1_Chr12	6200000	0.165	0.31968
odPhaVent1.1_Chr12	6300000	0.74	0.000999001
odPhaVent1.1_Chr12	6400000	1.725	0.000999001
odPhaVent1.1_Chr12	6500000	2.245	0.000999001
odPhaVent1.1_Chr12	6600000	-0.3	0.356643
odPhaVent1.1_Chr12	6700000	-1.34	0.000999001
odPhaVent1.1_Chr12_unloc_1	0	-4.175	0.000999001
odPhaVent1.1_Chr12_unloc_1	100000	-0.905	0.000999001
odPhaVent1.1_Chr12_unloc_2	0	-1.205	0.31968
odPhaVent1.1_Chr13	0	-1.07	0.000999001
odPhaVent1.1_Chr13	100000	1.22	0.356643
odPhaVent1.1_Chr13	200000	-2.865	0.000999001
odPhaVent1.1_Chr13	300000	-1.4	0.000999001
odPhaVent1.1_Chr13	400000	0.11	0.356643
odPhaVent1.1_Chr13	500000	-1.34	0.000999001
odPhaVent1.1_Chr13	600000	-2.745	0.000999001
odPhaVent1.1_Chr13	700000	-2.52	0.000999001
odPhaVent1.1_Chr13	800000	-4.05	0.000999001
odPhaVent1.1_Chr13	900000	1.78	0.000999001
odPhaVent1.1_Chr13	1000000	-0.26	0.356643
odPhaVent1.1_Chr13	1100000	-0.61	0.000999001
odPhaVent1.1_Chr13	1200000	-0.575	0.000999001
odPhaVent1.1_Chr13	1300000	-1.565	0.000999001
odPhaVent1.1_Chr13	1400000	-1.06	0.000999001
odPhaVent1.1_Chr13	1500000	1.78	0.000999001
odPhaVent1.1_Chr13	1600000	1.415	0.000999001
odPhaVent1.1_Chr13	1700000	0.01	0.31968
odPhaVent1.1_Chr13	1800000	0.6	0.000999001
odPhaVent1.1_Chr13	1900000	-1.265	0.000999001
odPhaVent1.1_Chr13	2000000	-0.115	0.356643
odPhaVent1.1_Chr13	2100000	-1.145	0.000999001
odPhaVent1.1_Chr13	2200000	0.07	0.31968
odPhaVent1.1_Chr13	2300000	0.515	0.000999001
odPhaVent1.1_Chr13	2400000	-0.295	0.31968
odPhaVent1.1_Chr13	2500000	0.195	0.31968
odPhaVent1.1_Chr13	2600000	-0.175	0.000999001
odPhaVent1.1_Chr13	2700000	0.435	0.000999001
odPhaVent1.1_Chr13	2800000	1.615	0.000999001
odPhaVent1.1_Chr13	2900000	-1.8	0.000999001
odPhaVent1.1_Chr13	3000000	-1.725	0.000999001
odPhaVent1.1_Chr13	3100000	-0.46	0.31968
odPhaVent1.1_Chr13	3200000	-0.87	0.000999001
odPhaVent1.1_Chr13	3300000	0.62	0.356643
odPhaVent1.1_Chr13	3400000	2.055	0.000999001
odPhaVent1.1_Chr13	3500000	-2.88	0.000999001
odPhaVent1.1_Chr13	3600000	-0.1	0.000999001
odPhaVent1.1_Chr13	3700000	-1.35	0.000999001
odPhaVent1.1_Chr13	3800000	1.275	0.000999001
odPhaVent1.1_Chr13	3900000	1.25	0.000999001
odPhaVent1.1_Chr13	4000000	0.74	0.31968
odPhaVent1.1_Chr13	4100000	-0.98	0.000999001
odPhaVent1.1_Chr13	4200000	-2.155	0.000999001
odPhaVent1.1_Chr13	4300000	0.96	0.000999001
odPhaVent1.1_Chr13	4400000	-2.265	0.000999001
odPhaVent1.1_Chr13	4500000	0.715	0.000999001
odPhaVent1.1_Chr13	4600000	2.205	0.000999001
odPhaVent1.1_Chr13	4700000	0.685	0.000999001
odPhaVent1.1_Chr13	4800000	0.1	0.31968
odPhaVent1.1_Chr13	4900000	0.715	0.000999001
odPhaVent1.1_Chr13	5000000	0.04	0.356643
odPhaVent1.1_Chr13	5100000	1.17	0.000999001
odPhaVent1.1_Chr13	5200000	1.285	0.000999001
odPhaVent1.1_Chr13	5300000	1.86	0.000999001
odPhaVent1.1_Chr13	5400000	-0.27	0.31968
odPhaVent1.1_Chr13	5500000	0.57	0.000999001
odPhaVent1.1_Chr13	5600000	-0.24	0.356643
odPhaVent1.1_Chr13	5700000	-0.875	0.000999001
odPhaVent1.1_Chr13	5800000	-4.44	0.000999001
odPhaVent1.1_Chr13	5900000	0.49	0.000999001
odPhaVent1.1_Chr13	6000000	0.02	0.31968
odPhaVent1.1_Chr13	6100000	-1.435	0.000999001
odPhaVent1.1_Chr13	6200000	0.075	0.31968
odPhaVent1.1_Chr13	6300000	-0.785	0.000999001
odPhaVent1.1_Chr13	6400000	-1.99	0.000999001
odPhaVent1.1_Chr13	6500000	1.3	0.000999001
odPhaVent1.1_Chr13	6600000	2.6	0.000999001
odPhaVent1.1_Chr13	6700000	0.205	0.356643
odPhaVent1.1_Chr13	6800000	0.29	0.356643
odPhaVent1.1_Chr13	6900000	0.25	0.000999001
odPhaVent1.1_Chr14	0	0.075	0.356643
odPhaVent1.1_Chr14	100000	0.075	0.356643
odPhaVent1.1_Chr14	200000	0.145	0.31968
odPhaVent1.1_Chr14	300000	1.98	0.000999001
odPhaVent1.1_Chr14	400000	-0.58	0.000999001
odPhaVent1.1_Chr14	500000	0.785	0.000999001
odPhaVent1.1_Chr14	600000	-0.17	0.000999001
odPhaVent1.1_Chr14	700000	-1.225	0.000999001
odPhaVent1.1_Chr14	800000	-0.22	0.356643
odPhaVent1.1_Chr14	900000	-0.475	0.000999001
odPhaVent1.1_Chr14	1000000	-0.7	0.000999001
odPhaVent1.1_Chr14	1100000	0.04	0.31968
odPhaVent1.1_Chr14	1200000	-2.29	0.000999001
odPhaVent1.1_Chr14	1300000	-0.54	0.000999001
odPhaVent1.1_Chr14	1400000	0.01	0.356643
odPhaVent1.1_Chr14	1500000	-0.69	0.000999001
odPhaVent1.1_Chr14	1600000	-0.365	0.000999001
odPhaVent1.1_Chr14	1700000	-0.105	0.356643
odPhaVent1.1_Chr14	1800000	-0.78	0.000999001
odPhaVent1.1_Chr14	1900000	2.005	0.000999001
odPhaVent1.1_Chr14	2000000	-2.21	0.000999001
odPhaVent1.1_Chr14	2100000	-0.455	0.31968
odPhaVent1.1_Chr14	2200000	2.405	0.000999001
odPhaVent1.1_Chr14	2300000	-0.72	0.000999001
odPhaVent1.1_Chr14	2400000	-0.65	0.000999001
odPhaVent1.1_Chr14	2500000	1.34	0.000999001
odPhaVent1.1_Chr14	2600000	-0.87	0.000999001
odPhaVent1.1_Chr14	2700000	0.43	0.356643
odPhaVent1.1_Chr14	2800000	-0.53	0.000999001
odPhaVent1.1_Chr14	2900000	2.105	0.000999001
odPhaVent1.1_Chr14	3000000	1.225	0.000999001
odPhaVent1.1_Chr14	3100000	-1.49	0.000999001
odPhaVent1.1_Chr14	3200000	-0.1	0.31968
odPhaVent1.1_Chr14	3300000	-0.775	0.000999001
odPhaVent1.1_Chr14	3400000	-0.325	0.000999001
odPhaVent1.1_Chr14	3500000	-0.38	0.000999001
odPhaVent1.1_Chr14	3600000	1.87	0.000999001
odPhaVent1.1_Chr14	3700000	1.265	0.000999001
odPhaVent1.1_Chr14	3800000	-0.515	0.31968
odPhaVent1.1_Chr14	3900000	-2.165	0.000999001
odPhaVent1.1_Chr14	4000000	-0.165	0.31968
odPhaVent1.1_Chr14	4100000	-0.02	0.31968
odPhaVent1.1_Chr14	4200000	1.03	0.000999001
odPhaVent1.1_Chr14	4300000	0.005	0.31968
odPhaVent1.1_Chr14	4400000	0.915	0.31968
odPhaVent1.1_Chr14	4500000	-1.32	0.356643
odPhaVent1.1_Chr14	4600000	0.165	0.356643
odPhaVent1.1_Chr14	4700000	-1.16	0.000999001
odPhaVent1.1_Chr14	4800000	0.725	0.000999001
odPhaVent1.1_Chr14	4900000	2.325	0.000999001
odPhaVent1.1_Chr14	5000000	0.34	0.31968
odPhaVent1.1_Chr14	5100000	0.9	0.000999001
odPhaVent1.1_Chr14	5200000	0.435	0.31968
odPhaVent1.1_Chr14	5300000	-0.135	0.31968
odPhaVent1.1_Chr14	5400000	2.62	0.000999001
odPhaVent1.1_Chr14	5500000	-0.8	0.000999001
odPhaVent1.1_Chr14	5600000	0.3	0.356643
odPhaVent1.1_Chr14	5700000	0.27	0.31968
odPhaVent1.1_Chr14	5800000	-0.315	0.356643
odPhaVent1.1_Chr14	5900000	-0.865	0.000999001
odPhaVent1.1_Chr14	6000000	-0.75	0.000999001
odPhaVent1.1_Chr14	6100000	0	1
odPhaVent1.1_Chr14	6200000	0.8	0.000999001
odPhaVent1.1_Chr14	6300000	0.42	0.000999001
odPhaVent1.1_Chr14	6400000	-0.665	0.000999001
odPhaVent1.1_Chr14	6500000	0.45	0.000999001
odPhaVent1.1_Chr14_unloc_1	0	-0.72	0.000999001
odPhaVent1.1_Chr14_unloc_1	100000	-2.18	0.000999001
odPhaVent1.1_Chr14_unloc_2	0	0.06	0.31968
odPhaVent1.1_Chr14_unloc_3	0	-1.3	0.000999001
odPhaVent1.1_Chr14_unloc_4	0	1.11	0.000999001
odPhaVent1.1_Chr14_unloc_5	0	-0.17	0.000999001
odPhaVent1.1_Chr15	0	0.02	0.356643
odPhaVent1.1_Chr15	100000	0.18	0.356643
odPhaVent1.1_Chr15	200000	-0.01	0.356643
odPhaVent1.1_Chr15	300000	0.185	0.000999001
odPhaVent1.1_Chr15	400000	1.255	0.000999001
odPhaVent1.1_Chr15	500000	1.03	0.000999001
odPhaVent1.1_Chr15	600000	-0.81	0.000999001
odPhaVent1.1_Chr15	700000	-1.875	0.000999001
odPhaVent1.1_Chr15	800000	-0.77	0.000999001
odPhaVent1.1_Chr15	900000	0.125	0.356643
odPhaVent1.1_Chr15	1000000	2.955	0.000999001
odPhaVent1.1_Chr15	1100000	-1.06	0.000999001
odPhaVent1.1_Chr15	1200000	-0.43	0.000999001
odPhaVent1.1_Chr15	1300000	1.75	0.000999001
odPhaVent1.1_Chr15	1400000	-1.23	0.000999001
odPhaVent1.1_Chr15	1500000	-1.53	0.000999001
odPhaVent1.1_Chr15	1600000	-0.88	0.000999001
odPhaVent1.1_Chr15	1700000	0.065	0.356643
odPhaVent1.1_Chr15	1800000	0.315	0.31968
odPhaVent1.1_Chr15	1900000	0.63	0.000999001
odPhaVent1.1_Chr15	2000000	0.695	0.000999001
odPhaVent1.1_Chr15	2100000	1.545	0.000999001
odPhaVent1.1_Chr15	2200000	2.245	0.000999001
odPhaVent1.1_Chr15	2300000	-0.605	0.000999001
odPhaVent1.1_Chr15	2400000	1.43	0.000999001
odPhaVent1.1_Chr15	2500000	0.865	0.356643
odPhaVent1.1_Chr15	2600000	-3.645	0.000999001
odPhaVent1.1_Chr15	2700000	-1.595	0.000999001
odPhaVent1.1_Chr15	2800000	0.825	0.000999001
odPhaVent1.1_Chr15	2900000	2.945	0.000999001
odPhaVent1.1_Chr15	3000000	2.275	0.000999001
odPhaVent1.1_Chr15	3100000	0.235	0.000999001
odPhaVent1.1_Chr15	3200000	0.105	0.356643
odPhaVent1.1_Chr15	3300000	0.115	0.31968
odPhaVent1.1_Chr15	3400000	-0.255	0.31968
odPhaVent1.1_Chr15	3500000	-0.195	0.356643
odPhaVent1.1_Chr15	3600000	1.225	0.000999001
odPhaVent1.1_Chr15	3700000	-0.985	0.000999001
odPhaVent1.1_Chr15	3800000	0.28	0.31968
odPhaVent1.1_Chr15	3900000	-3.415	0.000999001
odPhaVent1.1_Chr15	4000000	-0.44	0.356643
odPhaVent1.1_Chr15	4100000	-2.71	0.000999001
odPhaVent1.1_Chr15	4200000	-3.93	0.000999001
odPhaVent1.1_Chr15	4300000	-2.235	0.000999001
odPhaVent1.1_Chr15	4400000	-2.715	0.000999001
odPhaVent1.1_Chr15	4500000	0.225	0.31968
odPhaVent1.1_Chr15	4600000	-0.065	0.31968
odPhaVent1.1_Chr15	4700000	-1.275	0.000999001
odPhaVent1.1_Chr15	4800000	0.795	0.000999001
odPhaVent1.1_Chr15	4900000	1.265	0.000999001
odPhaVent1.1_Chr15	5000000	0.305	0.31968
odPhaVent1.1_Chr15	5100000	0.545	0.356643
odPhaVent1.1_Chr15	5200000	1.195	0.000999001
odPhaVent1.1_Chr15	5300000	-0.555	0.31968
odPhaVent1.1_Chr15	5400000	-0.89	0.000999001
odPhaVent1.1_Chr15	5500000	-1.01	0.31968
odPhaVent1.1_Chr15	5600000	0.59	0.356643
odPhaVent1.1_Chr15	5700000	0.675	0.000999001
odPhaVent1.1_Chr15	5800000	-0.66	0.000999001
odPhaVent1.1_Chr15	5900000	-0.51	0.000999001
odPhaVent1.1_Chr15	6000000	-0.385	0.000999001
odPhaVent1.1_Chr15	6100000	1.605	0.000999001
odPhaVent1.1_Chr15	6200000	0.825	0.000999001
odPhaVent1.1_Chr15	6300000	1.395	0.000999001
odPhaVent1.1_Chr15	6400000	1.415	0.000999001
odPhaVent1.1_Chr15	6500000	0.715	0.31968
odPhaVent1.1_Chr15	6600000	2.175	0.000999001
odPhaVent1.1_Chr15	6700000	0.03	0.31968
odPhaVent1.1_Chr15	6800000	-1.45	0.000999001
odPhaVent1.1_Chr15	6900000	0.24	0.000999001
odPhaVent1.1_Chr16	0	2.215	0.000999001
odPhaVent1.1_Chr16	100000	-0.1	0.31968
odPhaVent1.1_Chr16	200000	-3.105	0.000999001
odPhaVent1.1_Chr16	300000	-0.54	0.31968
odPhaVent1.1_Chr16	400000	-3.415	0.000999001
odPhaVent1.1_Chr16	500000	-3.465	0.000999001
odPhaVent1.1_Chr16	600000	-3.75	0.000999001
odPhaVent1.1_Chr16	700000	-0.55	0.356643
odPhaVent1.1_Chr16	800000	0.05	0.31968
odPhaVent1.1_Chr16	900000	0.26	0.356643
odPhaVent1.1_Chr16	1000000	-1.925	0.356643
odPhaVent1.1_Chr16	1100000	-0.15	0.31968
odPhaVent1.1_Chr16	1200000	0.235	0.356643
odPhaVent1.1_Chr16	1300000	-0.79	0.000999001
odPhaVent1.1_Chr16	1400000	1.625	0.000999001
odPhaVent1.1_Chr16	1500000	-0.25	0.31968
odPhaVent1.1_Chr16	1600000	-0.1	0.000999001
odPhaVent1.1_Chr16	1700000	-0.94	0.000999001
odPhaVent1.1_Chr16	1800000	-0.085	0.356643
odPhaVent1.1_Chr16	1900000	0.21	0.356643
odPhaVent1.1_Chr16	2000000	0.005	0.356643
odPhaVent1.1_Chr16	2100000	-2.05	0.000999001
odPhaVent1.1_Chr16	2200000	0.68	0.000999001
odPhaVent1.1_Chr16	2300000	1.16	0.31968
odPhaVent1.1_Chr16	2400000	2.08	0.000999001
odPhaVent1.1_Chr16	2500000	1.58	0.000999001
odPhaVent1.1_Chr16	2600000	1.715	0.000999001
odPhaVent1.1_Chr16	2700000	1.135	0.000999001
odPhaVent1.1_Chr16	2800000	1.635	0.000999001
odPhaVent1.1_Chr16	2900000	-1.055	0.000999001
odPhaVent1.1_Chr16	3000000	0.03	0.31968
odPhaVent1.1_Chr16	3100000	-0.535	0.31968
odPhaVent1.1_Chr16	3200000	0.02	0.356643
odPhaVent1.1_Chr16	3300000	0.13	0.356643
odPhaVent1.1_Chr16	3400000	-0.305	0.31968
odPhaVent1.1_Chr16	3500000	-0.21	0.31968
odPhaVent1.1_Chr16	3600000	-1.755	0.000999001
odPhaVent1.1_Chr16	3700000	-3.415	0.000999001
odPhaVent1.1_Chr16	3800000	1.67	0.000999001
odPhaVent1.1_Chr16	3900000	-0.19	0.356643
odPhaVent1.1_Chr16	4000000	-1.795	0.000999001
odPhaVent1.1_Chr16	4100000	1.495	0.000999001
odPhaVent1.1_Chr16	4200000	2.125	0.000999001
odPhaVent1.1_Chr16	4300000	0.695	0.000999001
odPhaVent1.1_Chr16	4400000	-0.955	0.000999001
odPhaVent1.1_Chr16	4500000	1.745	0.000999001
odPhaVent1.1_Chr16	4600000	1.26	0.000999001
odPhaVent1.1_Chr16	4700000	1.215	0.000999001
odPhaVent1.1_Chr16	4800000	1.94	0.000999001
odPhaVent1.1_Chr16	4900000	-0.85	0.000999001
odPhaVent1.1_Chr16	5000000	-0.37	0.31968
odPhaVent1.1_Chr16	5100000	-0.33	0.31968
odPhaVent1.1_Chr16	5200000	0.15	0.356643
odPhaVent1.1_Chr16	5300000	1.54	0.000999001
odPhaVent1.1_Chr16	5400000	-0.82	0.000999001
odPhaVent1.1_Chr16	5500000	-1.5	0.000999001
odPhaVent1.1_Chr16	5600000	0.235	0.356643
odPhaVent1.1_Chr16	5700000	0.06	0.356643
odPhaVent1.1_Chr16	5800000	5.84	0.000999001
odPhaVent1.1_Chr16	5900000	0.96	0.31968
odPhaVent1.1_Chr16	6000000	0.75	0.000999001
odPhaVent1.1_Chr16	6100000	0.295	0.31968
odPhaVent1.1_Chr16	6200000	0.115	0.31968
odPhaVent1.1_Chr16	6300000	0.01	0.31968
odPhaVent1.1_Chr16	6400000	-0.16	0.31968
odPhaVent1.1_Chr16	6500000	0.53	0.000999001
odPhaVent1.1_Chr16	6600000	-2.06	0.000999001
odPhaVent1.1_Chr16	6700000	-0.79	0.356643
odPhaVent1.1_Chr16	6800000	-0.575	0.000999001
odPhaVent1.1_Chr16	6900000	0	1
odPhaVent1.1_Chr17	0	-1.085	0.000999001
odPhaVent1.1_Chr17	100000	-0.75	0.356643
odPhaVent1.1_Chr17	200000	-1.41	0.000999001
odPhaVent1.1_Chr17	300000	-0.995	0.31968
odPhaVent1.1_Chr17	400000	-2.79	0.000999001
odPhaVent1.1_Chr17	500000	0.84	0.31968
odPhaVent1.1_Chr17	600000	-1.135	0.000999001
odPhaVent1.1_Chr17	700000	-0.305	0.31968
odPhaVent1.1_Chr17	800000	0.605	0.31968
odPhaVent1.1_Chr17	900000	2.73	0.000999001
odPhaVent1.1_Chr17	1000000	2.32	0.000999001
odPhaVent1.1_Chr17	1100000	1.09	0.000999001
odPhaVent1.1_Chr17	1200000	3.21	0.000999001
odPhaVent1.1_Chr17	1300000	1.63	0.000999001
odPhaVent1.1_Chr17	1400000	-0.025	0.31968
odPhaVent1.1_Chr17	1500000	-3.73	0.000999001
odPhaVent1.1_Chr17	1600000	0	1
odPhaVent1.1_Chr17	1700000	-2.27	0.000999001
odPhaVent1.1_Chr17	1800000	-2.11	0.000999001
odPhaVent1.1_Chr17	1900000	0.155	0.31968
odPhaVent1.1_Chr17	2000000	0.235	0.356643
odPhaVent1.1_Chr17	2100000	-0.145	0.356643
odPhaVent1.1_Chr17	2200000	-2.515	0.000999001
odPhaVent1.1_Chr17	2300000	-0.505	0.356643
odPhaVent1.1_Chr17	2400000	-1.62	0.000999001
odPhaVent1.1_Chr17	2500000	-1.255	0.000999001
odPhaVent1.1_Chr17	2600000	-3.455	0.000999001
odPhaVent1.1_Chr17	2700000	-4.635	0.000999001
odPhaVent1.1_Chr17	2800000	0.16	0.000999001
odPhaVent1.1_Chr17	2900000	0.025	0.31968
odPhaVent1.1_Chr17	3000000	-0.23	0.000999001
odPhaVent1.1_Chr17	3100000	-0.085	0.356643
odPhaVent1.1_Chr17	3200000	-0.835	0.356643
odPhaVent1.1_Chr17	3300000	-0.86	0.356643
odPhaVent1.1_Chr17	3400000	1.515	0.000999001
odPhaVent1.1_Chr17	3500000	2.77	0.000999001
odPhaVent1.1_Chr17	3600000	3.405	0.000999001
odPhaVent1.1_Chr17	3700000	1.735	0.000999001
odPhaVent1.1_Chr17	3800000	-1.275	0.000999001
odPhaVent1.1_Chr17	3900000	-1.305	0.000999001
odPhaVent1.1_Chr17	4000000	0.155	0.31968
odPhaVent1.1_Chr17	4100000	0.805	0.000999001
odPhaVent1.1_Chr17	4200000	1.265	0.000999001
odPhaVent1.1_Chr17	4300000	-0.565	0.31968
odPhaVent1.1_Chr17	4400000	0.25	0.31968
odPhaVent1.1_Chr17	4500000	-1.49	0.000999001
odPhaVent1.1_Chr17	4600000	-0.985	0.000999001
odPhaVent1.1_Chr17	4700000	0.785	0.356643
odPhaVent1.1_Chr17	4800000	-1.465	0.000999001
odPhaVent1.1_Chr17	4900000	-3.1	0.000999001
odPhaVent1.1_Chr17	5000000	1.44	0.000999001
odPhaVent1.1_Chr17	5100000	-0.47	0.000999001
odPhaVent1.1_Chr17	5200000	0.015	0.31968
odPhaVent1.1_Chr17	5300000	2.74	0.000999001
odPhaVent1.1_Chr17	5400000	1.265	0.000999001
odPhaVent1.1_Chr17	5500000	0.11	0.356643
odPhaVent1.1_Chr17	5600000	-1.72	0.000999001
odPhaVent1.1_Chr17	5700000	3.19	0.000999001
odPhaVent1.1_Chr17	5800000	2.485	0.000999001
odPhaVent1.1_Chr17	5900000	-0.27	0.31968
odPhaVent1.1_Chr17	6000000	-1.78	0.000999001
odPhaVent1.1_Chr17	6100000	-0.11	0.31968
odPhaVent1.1_Chr17	6200000	-1.485	0.000999001
odPhaVent1.1_Chr17	6300000	-0.24	0.356643
odPhaVent1.1_Chr17	6400000	-1.885	0.000999001
odPhaVent1.1_Chr17	6500000	0.38	0.000999001
odPhaVent1.1_Chr17_unloc_1	0	3.375	0.000999001
odPhaVent1.1_Chr17_unloc_2	0	-0.04	0.31968
odPhaVent1.1_Chr17_unloc_3	0	-0.015	0.31968
odPhaVent1.1_Chr18	0	-0.12	0.356643
odPhaVent1.1_Chr18	100000	1.3	0.000999001
odPhaVent1.1_Chr18	200000	1.705	0.000999001
odPhaVent1.1_Chr18	300000	-3.275	0.000999001
odPhaVent1.1_Chr18	400000	-0.63	0.000999001
odPhaVent1.1_Chr18	500000	-2.555	0.000999001
odPhaVent1.1_Chr18	600000	-1.11	0.31968
odPhaVent1.1_Chr18	700000	-0.36	0.000999001
odPhaVent1.1_Chr18	800000	0.755	0.000999001
odPhaVent1.1_Chr18	900000	1.15	0.000999001
odPhaVent1.1_Chr18	1000000	-1.415	0.000999001
odPhaVent1.1_Chr18	1100000	-2.58	0.000999001
odPhaVent1.1_Chr18	1200000	-1.865	0.000999001
odPhaVent1.1_Chr18	1300000	0	1
odPhaVent1.1_Chr18	1400000	1.28	0.000999001
odPhaVent1.1_Chr18	1500000	-0.515	0.356643
odPhaVent1.1_Chr18	1600000	-0.585	0.356643
odPhaVent1.1_Chr18	1700000	-1.565	0.000999001
odPhaVent1.1_Chr18	1800000	-0.98	0.000999001
odPhaVent1.1_Chr18	1900000	3.475	0.000999001
odPhaVent1.1_Chr18	2000000	0.75	0.356643
odPhaVent1.1_Chr18	2100000	-0.85	0.000999001
odPhaVent1.1_Chr18	2200000	-0.26	0.000999001
odPhaVent1.1_Chr18	2300000	-0.79	0.000999001
odPhaVent1.1_Chr18	2400000	-0.35	0.000999001
odPhaVent1.1_Chr18	2500000	-1.9	0.000999001
odPhaVent1.1_Chr18	2600000	0	1
odPhaVent1.1_Chr18	2700000	-1.51	0.000999001
odPhaVent1.1_Chr18	2800000	-0.18	0.31968
odPhaVent1.1_Chr18	2900000	0.96	0.000999001
odPhaVent1.1_Chr18	3000000	-0.32	0.356643
odPhaVent1.1_Chr18	3100000	-0.66	0.000999001
odPhaVent1.1_Chr18	3200000	-0.41	0.31968
odPhaVent1.1_Chr18	3300000	-2.29	0.000999001
odPhaVent1.1_Chr18	3400000	0.375	0.000999001
odPhaVent1.1_Chr18	3500000	-0.045	0.356643
odPhaVent1.1_Chr18	3600000	0.745	0.000999001
odPhaVent1.1_Chr18	3700000	0.125	0.000999001
odPhaVent1.1_Chr18	3800000	-1.295	0.000999001
odPhaVent1.1_Chr18	3900000	0.69	0.31968
odPhaVent1.1_Chr18	4000000	0.87	0.000999001
odPhaVent1.1_Chr18	4100000	-0.82	0.356643
odPhaVent1.1_Chr18	4200000	-0.095	0.356643
odPhaVent1.1_Chr18	4300000	-0.53	0.000999001
odPhaVent1.1_Chr18	4400000	-0.245	0.31968
odPhaVent1.1_Chr18	4500000	-3.62	0.000999001
odPhaVent1.1_Chr18	4600000	-0.035	0.31968
odPhaVent1.1_Chr18	4700000	1.315	0.356643
odPhaVent1.1_Chr18	4800000	-1.015	0.000999001
odPhaVent1.1_Chr18	4900000	-5.88	0.000999001
odPhaVent1.1_Chr18	5000000	0.52	0.000999001
odPhaVent1.1_Chr18	5100000	-0.035	0.356643
odPhaVent1.1_Chr18	5200000	-0.695	0.000999001
odPhaVent1.1_Chr18	5300000	1.215	0.000999001
odPhaVent1.1_Chr18	5400000	2.45	0.000999001
odPhaVent1.1_Chr18	5500000	-0.815	0.356643
odPhaVent1.1_Chr18	5600000	-0.015	0.356643
odPhaVent1.1_Chr18	5700000	-0.73	0.000999001
odPhaVent1.1_Chr18	5800000	-0.425	0.000999001
odPhaVent1.1_Chr18	5900000	-0.49	0.000999001
odPhaVent1.1_Chr18	6000000	-0.115	0.356643
odPhaVent1.1_Chr18	6100000	1.78	0.000999001
odPhaVent1.1_Chr18	6200000	2.71	0.000999001
odPhaVent1.1_Chr18	6300000	2.16	0.000999001
odPhaVent1.1_Chr18	6400000	-1.355	0.000999001
odPhaVent1.1_Chr18	6500000	1.79	0.000999001
odPhaVent1.1_Chr18	6600000	0.05	0.31968
odPhaVent1.1_Chr19	0	-0.885	0.000999001
odPhaVent1.1_Chr19	100000	0.22	0.31968
odPhaVent1.1_Chr19	200000	0.08	0.31968
odPhaVent1.1_Chr19	300000	1.11	0.000999001
odPhaVent1.1_Chr19	400000	0.83	0.000999001
odPhaVent1.1_Chr19	500000	-0.08	0.356643
odPhaVent1.1_Chr19	600000	-2.48	0.000999001
odPhaVent1.1_Chr19	700000	0.935	0.31968
odPhaVent1.1_Chr19	800000	0.05	0.31968
odPhaVent1.1_Chr19	900000	-1.455	0.000999001
odPhaVent1.1_Chr19	1000000	-1.535	0.000999001
odPhaVent1.1_Chr19	1100000	-2.18	0.000999001
odPhaVent1.1_Chr19	1200000	-0.385	0.000999001
odPhaVent1.1_Chr19	1300000	-0.535	0.356643
odPhaVent1.1_Chr19	1400000	-1.94	0.000999001
odPhaVent1.1_Chr19	1500000	0.9	0.000999001
odPhaVent1.1_Chr19	1600000	-1.145	0.000999001
odPhaVent1.1_Chr19	1700000	-0.255	0.356643
odPhaVent1.1_Chr19	1800000	-0.445	0.356643
odPhaVent1.1_Chr19	1900000	1.01	0.000999001
odPhaVent1.1_Chr19	2000000	-2.15	0.000999001
odPhaVent1.1_Chr19	2100000	-1.36	0.000999001
odPhaVent1.1_Chr19	2200000	-0.975	0.000999001
odPhaVent1.1_Chr19	2300000	-0.52	0.31968
odPhaVent1.1_Chr19	2400000	-1.39	0.000999001
odPhaVent1.1_Chr19	2500000	-0.13	0.31968
odPhaVent1.1_Chr19	2600000	-0.43	0.000999001
odPhaVent1.1_Chr19	2700000	0.165	0.356643
odPhaVent1.1_Chr19	2800000	0.21	0.356643
odPhaVent1.1_Chr19	2900000	-0.045	0.000999001
odPhaVent1.1_Chr19	3000000	-0.53	0.000999001
odPhaVent1.1_Chr19	3100000	-0.72	0.000999001
odPhaVent1.1_Chr19	3200000	0.95	0.000999001
odPhaVent1.1_Chr19	3300000	1.01	0.000999001
odPhaVent1.1_Chr19	3400000	0.435	0.000999001
odPhaVent1.1_Chr19	3500000	1.755	0.000999001
odPhaVent1.1_Chr19	3600000	1.38	0.000999001
odPhaVent1.1_Chr19	3700000	-1.1	0.000999001
odPhaVent1.1_Chr19	3800000	-3.475	0.000999001
odPhaVent1.1_Chr19	3900000	0.68	0.000999001
odPhaVent1.1_Chr19	4000000	1.235	0.000999001
odPhaVent1.1_Chr19	4100000	0.135	0.000999001
odPhaVent1.1_Chr19	4200000	-0.365	0.000999001
odPhaVent1.1_Chr19	4300000	-0.545	0.000999001
odPhaVent1.1_Chr19	4400000	0.585	0.31968
odPhaVent1.1_Chr19	4500000	-0.605	0.000999001
odPhaVent1.1_Chr19	4600000	0.845	0.000999001
odPhaVent1.1_Chr19	4700000	0.62	0.000999001
odPhaVent1.1_Chr19	4800000	-0.075	0.356643
odPhaVent1.1_Chr19	4900000	-0.815	0.356643
odPhaVent1.1_Chr19	5000000	0.41	0.356643
odPhaVent1.1_Chr19	5100000	-0.015	0.356643
odPhaVent1.1_Chr19	5200000	0.195	0.000999001
odPhaVent1.1_Chr19	5300000	-0.165	0.356643
odPhaVent1.1_Chr19	5400000	-0.52	0.356643
odPhaVent1.1_Chr19	5500000	-1.265	0.000999001
odPhaVent1.1_Chr19	5600000	-1.745	0.000999001
odPhaVent1.1_Chr19	5700000	-0.105	0.31968
odPhaVent1.1_Chr19	5800000	-1.68	0.000999001
odPhaVent1.1_Chr19	5900000	-0.45	0.31968
odPhaVent1.1_Chr19	6000000	-0.96	0.000999001
odPhaVent1.1_Chr19	6100000	0.035	0.000999001
odPhaVent1.1_Chr19_unloc_1	0	0.315	0.000999001
odPhaVent1.1_Chr19_unloc_1	100000	0.38	0.356643
odPhaVent1.1_Chr20	0	-1.55	0.000999001
odPhaVent1.1_Chr20	100000	2.05	0.000999001
odPhaVent1.1_Chr20	200000	0.01	0.31968
odPhaVent1.1_Chr20	300000	-0.015	0.356643
odPhaVent1.1_Chr20	400000	-1	0.000999001
odPhaVent1.1_Chr20	500000	-0.595	0.000999001
odPhaVent1.1_Chr20	600000	-0.21	0.356643
odPhaVent1.1_Chr20	700000	-0.695	0.356643
odPhaVent1.1_Chr20	800000	0.17	0.31968
odPhaVent1.1_Chr20	900000	-0.29	0.000999001
odPhaVent1.1_Chr20	1000000	-2.405	0.000999001
odPhaVent1.1_Chr20	1100000	-0.105	0.356643
odPhaVent1.1_Chr20	1200000	-0.45	0.000999001
odPhaVent1.1_Chr20	1300000	-0.9	0.000999001
odPhaVent1.1_Chr20	1400000	-0.31	0.356643
odPhaVent1.1_Chr20	1500000	-0.97	0.356643
odPhaVent1.1_Chr20	1600000	-1.45	0.000999001
odPhaVent1.1_Chr20	1700000	0.92	0.000999001
odPhaVent1.1_Chr20	1800000	-0.01	0.356643
odPhaVent1.1_Chr20	1900000	-3.255	0.000999001
odPhaVent1.1_Chr20	2000000	0.825	0.000999001
odPhaVent1.1_Chr20	2100000	0.065	0.000999001
odPhaVent1.1_Chr20	2200000	-0.1	0.356643
odPhaVent1.1_Chr20	2300000	-0.51	0.000999001
odPhaVent1.1_Chr20	2400000	-0.3	0.000999001
odPhaVent1.1_Chr20	2500000	-3.3	0.000999001
odPhaVent1.1_Chr20	2600000	1.6	0.000999001
odPhaVent1.1_Chr20	2700000	0.205	0.31968
odPhaVent1.1_Chr20	2800000	0.085	0.31968
odPhaVent1.1_Chr20	2900000	0.625	0.000999001
odPhaVent1.1_Chr20	3000000	-0.68	0.000999001
odPhaVent1.1_Chr20	3100000	0.85	0.000999001
odPhaVent1.1_Chr20	3200000	-0.815	0.000999001
odPhaVent1.1_Chr20	3300000	-2.53	0.000999001
odPhaVent1.1_Chr20	3400000	-1.85	0.000999001
odPhaVent1.1_Chr20	3500000	-3.76	0.000999001
odPhaVent1.1_Chr20	3600000	-0.305	0.31968
odPhaVent1.1_Chr20	3700000	-1.305	0.000999001
odPhaVent1.1_Chr20	3800000	-0.875	0.000999001
odPhaVent1.1_Chr20	3900000	0.155	0.356643
odPhaVent1.1_Chr20	4000000	-1.015	0.000999001
odPhaVent1.1_Chr20	4100000	0.49	0.000999001
odPhaVent1.1_Chr20	4200000	0.655	0.000999001
odPhaVent1.1_Chr20	4300000	1.19	0.356643
odPhaVent1.1_Chr20	4400000	-1.01	0.000999001
odPhaVent1.1_Chr20	4500000	-5.595	0.000999001
odPhaVent1.1_Chr20	4600000	1.28	0.000999001
odPhaVent1.1_Chr20	4700000	-0.35	0.31968
odPhaVent1.1_Chr20	4800000	0.265	0.31968
odPhaVent1.1_Chr20	4900000	-0.93	0.000999001
odPhaVent1.1_Chr20	5000000	-5.385	0.000999001
odPhaVent1.1_Chr20	5100000	0.025	0.356643
odPhaVent1.1_Chr20	5200000	-0.855	0.31968
odPhaVent1.1_Chr20	5300000	2.44	0.000999001
odPhaVent1.1_Chr20	5400000	-1.215	0.000999001
odPhaVent1.1_Chr20	5500000	0.24	0.356643
odPhaVent1.1_Chr20	5600000	-0.305	0.000999001
odPhaVent1.1_Chr20	5700000	-1.735	0.000999001
odPhaVent1.1_Chr20	5800000	-2.855	0.000999001
odPhaVent1.1_Chr20	5900000	-0.185	0.000999001
odPhaVent1.1_Chr21	0	0.63	0.356643
odPhaVent1.1_Chr21	100000	1.385	0.000999001
odPhaVent1.1_Chr21	200000	0.445	0.356643
odPhaVent1.1_Chr21	300000	-2.575	0.000999001
odPhaVent1.1_Chr21	400000	-1.235	0.000999001
odPhaVent1.1_Chr21	500000	1.485	0.000999001
odPhaVent1.1_Chr21	600000	-8.895	0.000999001
odPhaVent1.1_Chr21	700000	-1.96	0.000999001
odPhaVent1.1_Chr21	800000	-2.78	0.000999001
odPhaVent1.1_Chr21	900000	-0.31	0.356643
odPhaVent1.1_Chr21	1000000	1.745	0.000999001
odPhaVent1.1_Chr21	1100000	-0.875	0.000999001
odPhaVent1.1_Chr21	1200000	-1.01	0.000999001
odPhaVent1.1_Chr21	1300000	-0.16	0.356643
odPhaVent1.1_Chr21	1400000	-0.695	0.000999001
odPhaVent1.1_Chr21	1500000	1.03	0.000999001
odPhaVent1.1_Chr21	1600000	0.575	0.000999001
odPhaVent1.1_Chr21	1700000	1.05	0.000999001
odPhaVent1.1_Chr21	1800000	1.045	0.000999001
odPhaVent1.1_Chr21	1900000	-2.085	0.000999001
odPhaVent1.1_Chr21	2000000	-2.2	0.000999001
odPhaVent1.1_Chr21	2100000	-0.325	0.000999001
odPhaVent1.1_Chr21	2200000	0.645	0.000999001
odPhaVent1.1_Chr21	2300000	-0.425	0.000999001
odPhaVent1.1_Chr21	2400000	0.09	0.000999001
odPhaVent1.1_Chr21	2500000	-0.8	0.000999001
odPhaVent1.1_Chr21	2600000	-0.17	0.31968
odPhaVent1.1_Chr21	2700000	-0.12	0.000999001
odPhaVent1.1_Chr21	2800000	-2.36	0.000999001
odPhaVent1.1_Chr21	2900000	-0.885	0.31968
odPhaVent1.1_Chr21	3000000	-1.815	0.000999001
odPhaVent1.1_Chr21	3100000	-0.93	0.000999001
odPhaVent1.1_Chr21	3200000	-1.64	0.000999001
odPhaVent1.1_Chr21	3300000	0.155	0.31968
odPhaVent1.1_Chr21	3400000	0.85	0.000999001
odPhaVent1.1_Chr21	3500000	0.7	0.31968
odPhaVent1.1_Chr21	3600000	2.47	0.000999001
odPhaVent1.1_Chr21	3700000	0.99	0.31968
odPhaVent1.1_Chr21	3800000	-2.615	0.000999001
odPhaVent1.1_Chr21	3900000	0.215	0.31968
odPhaVent1.1_Chr21	4000000	-2.46	0.000999001
odPhaVent1.1_Chr21	4100000	-1.9	0.000999001
odPhaVent1.1_Chr21	4200000	0.1	0.31968
odPhaVent1.1_Chr21	4300000	-4.32	0.000999001
odPhaVent1.1_Chr21	4400000	1.05	0.000999001
odPhaVent1.1_Chr21	4500000	0.64	0.000999001
odPhaVent1.1_Chr21	4600000	-2.005	0.000999001
odPhaVent1.1_Chr21	4700000	-0.06	0.000999001
odPhaVent1.1_Chr21	4800000	1.53	0.000999001
odPhaVent1.1_Chr21	4900000	-2.485	0.000999001
odPhaVent1.1_Chr21	5000000	-2.065	0.000999001
odPhaVent1.1_Chr21	5100000	0.02	0.31968
odPhaVent1.1_Chr21	5200000	-0.115	0.356643
odPhaVent1.1_Chr21	5300000	-1.18	0.000999001
odPhaVent1.1_Chr21	5400000	-0.295	0.000999001
odPhaVent1.1_Chr21	5500000	0.255	0.31968
odPhaVent1.1_Chr21	5600000	-0.465	0.000999001
odPhaVent1.1_Chr21	5700000	0.55	0.000999001
odPhaVent1.1_Chr21	5800000	0.23	0.000999001
odPhaVent1.1_Chr21	5900000	0.015	0.000999001
odPhaVent1.1_Chr22	0	0.01	0.31968
odPhaVent1.1_Chr22	100000	1.89	0.000999001
odPhaVent1.1_Chr22	200000	-1.035	0.000999001
odPhaVent1.1_Chr22	300000	-2.11	0.000999001
odPhaVent1.1_Chr22	400000	-1.85	0.000999001
odPhaVent1.1_Chr22	500000	-2.015	0.000999001
odPhaVent1.1_Chr22	600000	3.09	0.000999001
odPhaVent1.1_Chr22	700000	2.075	0.000999001
odPhaVent1.1_Chr22	800000	-1.535	0.000999001
odPhaVent1.1_Chr22	900000	-1.7	0.000999001
odPhaVent1.1_Chr22	1000000	-1.905	0.000999001
odPhaVent1.1_Chr22	1100000	0.23	0.356643
odPhaVent1.1_Chr22	1200000	-1.7	0.000999001
odPhaVent1.1_Chr22	1300000	2.28	0.000999001
odPhaVent1.1_Chr22	1400000	1.73	0.000999001
odPhaVent1.1_Chr22	1500000	1.53	0.000999001
odPhaVent1.1_Chr22	1600000	-0.24	0.000999001
odPhaVent1.1_Chr22	1700000	-0.06	0.356643
odPhaVent1.1_Chr22	1800000	1.905	0.000999001
odPhaVent1.1_Chr22	1900000	-0.35	0.31968
odPhaVent1.1_Chr22	2000000	-0.505	0.356643
odPhaVent1.1_Chr22	2100000	-0.94	0.000999001
odPhaVent1.1_Chr22	2200000	-0.435	0.31968
odPhaVent1.1_Chr22	2300000	-0.405	0.000999001
odPhaVent1.1_Chr22	2400000	0.695	0.356643
odPhaVent1.1_Chr22	2500000	0.565	0.356643
odPhaVent1.1_Chr22	2600000	-0.695	0.000999001
odPhaVent1.1_Chr22	2700000	1.115	0.000999001
odPhaVent1.1_Chr22	2800000	0.675	0.31968
odPhaVent1.1_Chr22	2900000	-2.15	0.000999001
odPhaVent1.1_Chr22	3000000	-0.41	0.356643
odPhaVent1.1_Chr22	3100000	1.71	0.31968
odPhaVent1.1_Chr22	3200000	0.785	0.31968
odPhaVent1.1_Chr22	3300000	0.95	0.000999001
odPhaVent1.1_Chr22	3400000	0.825	0.000999001
odPhaVent1.1_Chr22	3500000	-1.58	0.000999001
odPhaVent1.1_Chr22	3600000	0.06	0.31968
odPhaVent1.1_Chr22	3700000	0.51	0.356643
odPhaVent1.1_Chr22	3800000	-2.8	0.000999001
odPhaVent1.1_Chr22	3900000	0.865	0.000999001
odPhaVent1.1_Chr22	4000000	-1.505	0.000999001
odPhaVent1.1_Chr22	4100000	0.675	0.000999001
odPhaVent1.1_Chr22	4200000	0.455	0.000999001
odPhaVent1.1_Chr22	4300000	-1.29	0.000999001
odPhaVent1.1_Chr22	4400000	-0.925	0.000999001
odPhaVent1.1_Chr22	4500000	-0.1	0.356643
odPhaVent1.1_Chr22	4600000	0.445	0.000999001
odPhaVent1.1_Chr22	4700000	1.41	0.000999001
odPhaVent1.1_Chr22	4800000	1.32	0.000999001
odPhaVent1.1_Chr22	4900000	1.685	0.000999001
odPhaVent1.1_Chr22	5000000	-1.995	0.000999001
odPhaVent1.1_Chr22	5100000	-1.39	0.000999001
odPhaVent1.1_Chr22	5200000	-0.3	0.31968
odPhaVent1.1_Chr22	5300000	-0.345	0.356643
odPhaVent1.1_Chr22	5400000	-0.73	0.000999001
odPhaVent1.1_Chr22	5500000	-1.075	0.000999001
odPhaVent1.1_Chr22	5600000	-0.02	0.356643
odPhaVent1.1_Chr22_unloc_1	0	-0.86	0.000999001
odPhaVent1.1_Chr23	0	0.24	0.000999001
odPhaVent1.1_Chr23	100000	-1.96	0.000999001
odPhaVent1.1_Chr23	200000	-2.96	0.000999001
odPhaVent1.1_Chr23	300000	0.15	0.356643
odPhaVent1.1_Chr23	400000	1.09	0.356643
odPhaVent1.1_Chr23	500000	-0.53	0.000999001
odPhaVent1.1_Chr23	600000	-3.525	0.000999001
odPhaVent1.1_Chr23	700000	-3.865	0.000999001
odPhaVent1.1_Chr23	800000	-3.42	0.000999001
odPhaVent1.1_Chr23	900000	-2.72	0.000999001
odPhaVent1.1_Chr23	1000000	-1.02	0.000999001
odPhaVent1.1_Chr23	1100000	1.255	0.000999001
odPhaVent1.1_Chr23	1200000	0.25	0.356643
odPhaVent1.1_Chr23	1300000	-1.49	0.000999001
odPhaVent1.1_Chr23	1400000	-2.09	0.000999001
odPhaVent1.1_Chr23	1500000	1.26	0.356643
odPhaVent1.1_Chr23	1600000	-0.9	0.000999001
odPhaVent1.1_Chr23	1700000	0.275	0.356643
odPhaVent1.1_Chr23	1800000	-1.95	0.000999001
odPhaVent1.1_Chr23	1900000	-1.905	0.000999001
odPhaVent1.1_Chr23	2000000	0.905	0.000999001
odPhaVent1.1_Chr23	2100000	0.245	0.356643
odPhaVent1.1_Chr23	2200000	-0.115	0.000999001
odPhaVent1.1_Chr23	2300000	-1.27	0.356643
odPhaVent1.1_Chr23	2400000	0.725	0.000999001
odPhaVent1.1_Chr23	2500000	0.625	0.000999001
odPhaVent1.1_Chr23	2600000	0.6	0.000999001
odPhaVent1.1_Chr23	2700000	-0.025	0.356643
odPhaVent1.1_Chr23	2800000	0.825	0.000999001
odPhaVent1.1_Chr23	2900000	-1.9	0.31968
odPhaVent1.1_Chr23	3000000	2.165	0.000999001
odPhaVent1.1_Chr23	3100000	-2.175	0.000999001
odPhaVent1.1_Chr23	3200000	0.125	0.356643
odPhaVent1.1_Chr23	3300000	0.035	0.31968
odPhaVent1.1_Chr23	3400000	-2.025	0.000999001
odPhaVent1.1_Chr23	3500000	0.355	0.000999001
odPhaVent1.1_Chr23	3600000	1.2	0.000999001
odPhaVent1.1_Chr23	3700000	-0.5	0.000999001
odPhaVent1.1_Chr23	3800000	-1.5	0.000999001
odPhaVent1.1_Chr23	3900000	-0.845	0.000999001
odPhaVent1.1_Chr23	4000000	-0.21	0.31968
odPhaVent1.1_Chr23	4100000	0.085	0.356643
odPhaVent1.1_Chr23	4200000	-0.185	0.31968
odPhaVent1.1_Chr23	4300000	0.595	0.000999001
odPhaVent1.1_Chr23	4400000	2.425	0.000999001
odPhaVent1.1_Chr23	4500000	2.355	0.000999001
odPhaVent1.1_Chr23	4600000	-0.475	0.31968
odPhaVent1.1_Chr23	4700000	-1.32	0.000999001
odPhaVent1.1_Chr23	4800000	-1.61	0.000999001
odPhaVent1.1_Chr23	4900000	2.695	0.000999001
odPhaVent1.1_Chr23	5000000	-0.29	0.356643
odPhaVent1.1_Chr23	5100000	0.175	0.31968
odPhaVent1.1_Chr23	5200000	1.12	0.000999001
odPhaVent1.1_Chr23	5300000	0.28	0.000999001
odPhaVent1.1_Chr23	5400000	-0.57	0.356643
odPhaVent1.1_Chr23	5500000	-0.09	0.31968
odPhaVent1.1_Chr23	5600000	-0.755	0.000999001
odPhaVent1.1_Chr24	0	1.085	0.000999001
odPhaVent1.1_Chr24	100000	-0.21	0.356643
odPhaVent1.1_Chr24	200000	-0.625	0.000999001
odPhaVent1.1_Chr24	300000	-0.45	0.31968
odPhaVent1.1_Chr24	400000	-2.02	0.000999001
odPhaVent1.1_Chr24	500000	-0.015	0.356643
odPhaVent1.1_Chr24	600000	0.21	0.356643
odPhaVent1.1_Chr24	700000	-0.44	0.000999001
odPhaVent1.1_Chr24	800000	0.31	0.356643
odPhaVent1.1_Chr24	900000	0.915	0.000999001
odPhaVent1.1_Chr24	1000000	1.035	0.000999001
odPhaVent1.1_Chr24	1100000	1.72	0.000999001
odPhaVent1.1_Chr24	1200000	-0.655	0.31968
odPhaVent1.1_Chr24	1300000	-1.755	0.31968
odPhaVent1.1_Chr24	1400000	-1.125	0.000999001
odPhaVent1.1_Chr24	1500000	1.905	0.356643
odPhaVent1.1_Chr24	1600000	0.115	0.356643
odPhaVent1.1_Chr24	1700000	-0.91	0.31968
odPhaVent1.1_Chr24	1800000	0.28	0.31968
odPhaVent1.1_Chr24	1900000	-0.565	0.000999001
odPhaVent1.1_Chr24	2000000	-1.17	0.000999001
odPhaVent1.1_Chr24	2100000	0.23	0.31968
odPhaVent1.1_Chr24	2200000	-0.13	0.000999001
odPhaVent1.1_Chr24	2300000	0.2	0.000999001
odPhaVent1.1_Chr24	2400000	-0.5	0.31968
odPhaVent1.1_Chr24	2500000	1.005	0.000999001
odPhaVent1.1_Chr24	2600000	0.355	0.000999001
odPhaVent1.1_Chr24	2700000	-1.115	0.000999001
odPhaVent1.1_Chr24	2800000	-1.57	0.000999001
odPhaVent1.1_Chr24	2900000	-0.905	0.000999001
odPhaVent1.1_Chr24	3000000	-0.095	0.356643
odPhaVent1.1_Chr24	3100000	2.71	0.000999001
odPhaVent1.1_Chr24	3200000	-0.295	0.000999001
odPhaVent1.1_Chr24	3300000	-0.265	0.356643
odPhaVent1.1_Chr24	3400000	-2.785	0.000999001
odPhaVent1.1_Chr24	3500000	-0.7	0.356643
odPhaVent1.1_Chr24	3600000	0.605	0.000999001
odPhaVent1.1_Chr24	3700000	0.035	0.356643
odPhaVent1.1_Chr24	3800000	0.21	0.31968
odPhaVent1.1_Chr24	3900000	-2.225	0.000999001
odPhaVent1.1_Chr24	4000000	-2.39	0.000999001
odPhaVent1.1_Chr24	4100000	-1.11	0.000999001
odPhaVent1.1_Chr24	4200000	0.18	0.356643
odPhaVent1.1_Chr24	4300000	0.82	0.000999001
odPhaVent1.1_Chr24	4400000	-0.76	0.000999001
odPhaVent1.1_Chr24	4500000	1.66	0.31968
odPhaVent1.1_Chr24	4600000	-2.095	0.000999001
odPhaVent1.1_Chr24	4700000	-1.56	0.000999001
odPhaVent1.1_Chr24	4800000	-1.03	0.000999001
odPhaVent1.1_Chr24	4900000	1.3	0.000999001
odPhaVent1.1_Chr24	5000000	0.08	0.000999001
odPhaVent1.1_Chr24	5100000	0.72	0.000999001
odPhaVent1.1_Chr24	5200000	3.48	0.000999001
odPhaVent1.1_Chr24	5300000	2.57	0.000999001
odPhaVent1.1_Chr24_unloc_1	0	0.51	0.31968
odPhaVent1.1_Chr25	0	-1.87	0.000999001
odPhaVent1.1_Chr25	100000	-0.46	0.000999001
odPhaVent1.1_Chr25	200000	-3.905	0.000999001
odPhaVent1.1_Chr25	300000	0.015	0.356643
odPhaVent1.1_Chr25	400000	1.815	0.000999001
odPhaVent1.1_Chr25	500000	-0.21	0.31968
odPhaVent1.1_Chr25	600000	1.82	0.000999001
odPhaVent1.1_Chr25	700000	0.015	0.31968
odPhaVent1.1_Chr25	800000	-0.64	0.356643
odPhaVent1.1_Chr25	900000	-0.78	0.000999001
odPhaVent1.1_Chr25	1000000	1.275	0.000999001
odPhaVent1.1_Chr25	1100000	-0.98	0.000999001
odPhaVent1.1_Chr25	1200000	-0.05	0.31968
odPhaVent1.1_Chr25	1300000	-1.895	0.000999001
odPhaVent1.1_Chr25	1400000	-0.805	0.356643
odPhaVent1.1_Chr25	1500000	-0.43	0.31968
odPhaVent1.1_Chr25	1600000	2.495	0.000999001
odPhaVent1.1_Chr25	1700000	-0.335	0.31968
odPhaVent1.1_Chr25	1800000	-3.96	0.000999001
odPhaVent1.1_Chr25	1900000	-0.535	0.000999001
odPhaVent1.1_Chr25	2000000	1.7	0.000999001
odPhaVent1.1_Chr25	2100000	0.245	0.356643
odPhaVent1.1_Chr25	2200000	-0.555	0.000999001
odPhaVent1.1_Chr25	2300000	1.04	0.000999001
odPhaVent1.1_Chr25	2400000	-1.665	0.000999001
odPhaVent1.1_Chr25	2500000	-0.17	0.31968
odPhaVent1.1_Chr25	2600000	-0.665	0.000999001
odPhaVent1.1_Chr25	2700000	-0.465	0.31968
odPhaVent1.1_Chr25	2800000	1.215	0.000999001
odPhaVent1.1_Chr25	2900000	0.355	0.356643
odPhaVent1.1_Chr25	3000000	0.81	0.356643
odPhaVent1.1_Chr25	3100000	-1.855	0.000999001
odPhaVent1.1_Chr25	3200000	-0.46	0.356643
odPhaVent1.1_Chr25	3300000	-0.655	0.31968
odPhaVent1.1_Chr25	3400000	-2.14	0.000999001
odPhaVent1.1_Chr25	3500000	0.695	0.31968
odPhaVent1.1_Chr25	3600000	-2.82	0.000999001
odPhaVent1.1_Chr25	3700000	-0.46	0.31968
odPhaVent1.1_Chr25	3800000	-2.36	0.000999001
odPhaVent1.1_Chr25	3900000	-0.585	0.000999001
odPhaVent1.1_Chr25	4000000	-1.83	0.000999001
odPhaVent1.1_Chr25	4100000	0.99	0.31968
odPhaVent1.1_Chr25	4200000	-0.44	0.31968
odPhaVent1.1_Chr25	4300000	-1.555	0.000999001
odPhaVent1.1_Chr25	4400000	-0.58	0.000999001
odPhaVent1.1_Chr25	4500000	-1.54	0.000999001
odPhaVent1.1_Chr25	4600000	-1.805	0.000999001
odPhaVent1.1_Chr25	4700000	-1.25	0.000999001
odPhaVent1.1_Chr25	4800000	-1.2	0.000999001
odPhaVent1.1_Chr25	4900000	-0.985	0.000999001
odPhaVent1.1_Chr25	5000000	0.585	0.000999001
odPhaVent1.1_Chr25	5100000	1.665	0.000999001
odPhaVent1.1_Chr25	5200000	-1.47	0.31968
odPhaVent1.1_Chr25	5300000	-1.385	0.31968
odPhaVent1.1_scaffold_93	0	0.015	0.000999001
odPhaVent1.1_scaffold_34	0	2.55	0.000999001
odPhaVent1.1_scaffold_34	100000	3.265	0.000999001
odPhaVent1.1_scaffold_34	200000	2.625	0.000999001
odPhaVent1.1_scaffold_71	0	0.045	0.000999001
odPhaVent1.1_scaffold_77	0	-0.08	0.356643
odPhaVent1.1_scaffold_46	0	0.125	0.356643
odPhaVent1.1_scaffold_90	0	0.105	0.31968
odPhaVent1.1_scaffold_87	0	1.595	0.000999001
odPhaVent1.1_scaffold_83	0	1.745	0.000999001
odPhaVent1.1_scaffold_59	0	5.145	0.000999001
odPhaVent1.1_scaffold_72	0	-2.125	0.000999001
odPhaVent1.1_scaffold_49	0	8.145	0.000999001
odPhaVent1.1_scaffold_61	0	1.045	0.31968
odPhaVent1.1_scaffold_82	0	3.27	0.000999001
odPhaVent1.1_scaffold_35	0	4.46	0.000999001
odPhaVent1.1_scaffold_35	100000	2.865	0.31968
odPhaVent1.1_scaffold_35	200000	0.84	0.000999001
odPhaVent1.1_scaffold_40	0	4.245	0.31968
odPhaVent1.1_scaffold_40	100000	1.965	0.000999001
odPhaVent1.1_scaffold_39	0	2.345	0.000999001
odPhaVent1.1_scaffold_39	100000	2.45	0.000999001
odPhaVent1.1_scaffold_54	0	-0.27	0.000999001
odPhaVent1.1_scaffold_92	0	-0.195	0.356643
odPhaVent1.1_scaffold_68	0	1.865	0.000999001
odPhaVent1.1_scaffold_63	0	2.905	0.000999001
