# Supplementary material for: Sponge genomes reveal a pre-metazoan origin of the sex determination toolkit and sex chromosomes
Source: Research Square preprint supplement (doi:10.21203/rs.3.rs-8554461/v1), 2026-02-12
Supplement: Supplementary file 10 [file 7781bce442bde5bdb51eaf41.xlsx]

## Sheet: A. Summary
	Chondrosia reniformis				Oscarella lobularis				Petrosia ficiformis				Phakellia ventilabrum				Axinella damicornis				Halichondria panicea
EventType	Total Events	Sex biased Significant Events	Total events on sex loci	Sex biased Significant Events on sex loci	Total Events	Sex biased Significant Events	Total events on sex loci	Sex biased Significant Events on sex loci	Total Events	Sex biased Significant Events	Total events on sex loci	Sex biased Significant Events on sex loci	Total Events	Sex biased Significant Events	Total events on sex loci	Sex biased Significant Events on sex loci	Total Events	Sex biased Significant Events	Total events on sex loci	Sex biased Significant Events on sex loci	Total Events	Sex biased Significant Events	Total events on sex loci	Sex biased Significant Events on sex loci
SE	8297	72	103	3	812	0	19	0	630	14	19	1	1116	17	21	3	2906	2	38	1	1432	0	5	0
A5SS	537	24	74	1	218	0	9	0	54	1	1	1	129	18	1	0	161	0	2	0	111	0	0	0
A3SS	776	15	4	4	503	0	0	0	110	2	0	0	214	14	3	1	355	0	6	0	243	2	0	0
MXE	744	19	2	2	37	0	0	0	26	2	1	0	39	4	2	0	238	0	9	0	66	4	0	0
RI	272	12	4	1	150	0	3	0	18	1	1	1	47	9	0	1	100	0	0	0	47	0	0	0
Total events	10626	142	187	11	1720	0	31	0	838	20	22	3	1545	62	27	5	3760	2	55	1	1899	6	5	0
Total N genes	17619				16685				24132				16621				17429				17431
Total N genes w/ sexloci	351				639				522				378				198				73
% genes with AS	60.3099				10.3087				3.47257				9.29547				21.5732				10.8944
% genes with sex biased AS		0.805948				0				3.83142				0.373022				0.0114751				0.0344214
% genes w/sexloci with AS			53.2764				4.85133				4.21456				7.14286				27.7778				6.84932
% genes w/sexloci with sex-biased AS				3.1339				0				0.574713				1.32275				0.505051				0

## Sheet: B. Chondrosia reniformis
ID	GeneID	geneSymbol	chr	strand	exonStart_0base	exonEnd	upstreamES	upstreamEE	downstreamES	downstreamEE	ID	IJC_SAMPLE_1	SJC_SAMPLE_1	IJC_SAMPLE_2	SJC_SAMPLE_2	IncFormLen	SkipFormLen	PValue	FDR	IncLevel1	IncLevel2	IncLevelDifference	Type_AS_event
1353	Choren_v00_mik.OX359198.1G972	NA	chrOX359198.1	-	7162906	7162964	7162458	7162806	7163555	7163815	1353	1,84,697,20,227,92,45,29	0,0,1,0,0,1,1,0	31,29,56,40,16	4,1,6,35,4	207	149	0	0	1.0,1.0,0.998,1.0,1.0,0.985,0.97,1.0	0.848,0.954,0.87,0.451,0.742	0.221	SE
5453	Choren_v00_mik.OX359194.1G1120	NA	chrOX359194.1	+	8604968	8605046	8604101	8604625	8605112	8605293	5453	2,38,49,30,13,29,22,64	3,101,417,99,81,62,46,115	31,12,10,48,10	111,26,1903,481,2120	227	149	0	0	0.304,0.198,0.072,0.166,0.095,0.235,0.239,0.268	0.155,0.233,0.003,0.061,0.003	0.106	SE
2914	Choren_v00_mik.OX359189.1G255	NA	chrOX359189.1	-	1197744	1198002	1197185	1197415	1198246	1198325	2914	0,2,19,7,4,4,9,12	1,115,792,97,118,84,135,34	13,0,2784,224,5502	17,24,30,133,47	298	149	9.65894e-15	2.67134e-11	0.0,0.009,0.012,0.035,0.017,0.023,0.032,0.15	0.277,0.0,0.979,0.457,0.983	-0.504	SE
1068	Choren_v00_mik.OX359199.1G711	NA	chrOX359199.1	-	5208119	5208231	5207928	5208056	5208555	5208756	1068	1.21528e+21	1,0,0,6,8,0,7,0	251126598462460	16,3,61,36,82	261	149	4.4964e-14	9.32666e-11	0.363,1.0,1.0,0.966,0.948,1.0,0.979,1.0	0.9,0.96,0.848,0.88,0.762	0.037	SE
4548	Choren_v00_mik.OX359197.1G46	NA	chrOX359197.1	-	213785	213962	213136	213269	214422	214560	4548	0,44,177,25,3,56,82,17	3,42,237,39,42,88,82,53	9,1,11,11,9	73,15,111,90,78	298	149	3.75588e-13	6.23251e-10	0.0,0.344,0.272,0.243,0.034,0.241,0.333,0.138	0.058,0.032,0.047,0.058,0.055	0.151	SE
6173	Choren_v00_mik.OX359193.1G153	NA	chrOX359193.1	+	642640	642730	642420	642469	643115	643199	6173	1,203,585,90,149,145,132,86	0,0,0,0,0,0,0,0	111,30,793,582,571	0,0,25,2,30	239	149	3.88576e-11	4.71385e-08	1.0,1.0,1.0,1.0,1.0,1.0,1.0,1.0	1.0,1.0,0.952,0.995,0.922	0.026	SE
522	Choren_v00_mik.OX359201.1G262	NA	chrOX359201.1	+	1378608	1379256	1375555	1375806	1379619	1380319	522	2,147,168,71,83,85,107,96	0,1,3,0,1,1,0,0	63,10,82,82,134	0,0,7,3,23	298	149	3.97697e-11	4.71385e-08	1.0,0.987,0.966,1.0,0.976,0.977,1.0,1.0	1.0,1.0,0.854,0.932,0.744	0.082	SE
1354	Choren_v00_mik.OX359198.1G972	NA	chrOX359198.1	-	7162906	7162964	7162458	7162806	7163562	7163815	1354	1,83,697,20,227,92,45,29	0,2,9,3,0,1,0,0	33,29,63,39,14	0,0,24,54,3	207	149	2.09993e-09	2.17788e-06	1.0,0.968,0.982,0.828,1.0,0.985,1.0,1.0	1.0,1.0,0.654,0.342,0.771	0.217	SE
6423	Choren_v00_mik.OX359202.1G111	NA	chrOX359202.1	-	482699	482755	482554	482644	482844	482900	6423	1.22392e+21	0,0,0,0,0,0,0,0	171,41,4535,2637,2941	0,0,17,0,178	205	149	5.05276e-09	4.65808e-06	1.0,1.0,1.0,1.0,1.0,1.0,1.0,1.0	1.0,1.0,0.995,1.0,0.923	0.016	SE
1839	Choren_v00_mik.OX359199.1G95	NA	chrOX359199.1	+	471127	471173	470759	470870	471300	471339	1839	1,163,830,63,228,69,116,63	0,0,0,0,0,0,0,0	44,4,250,295,462	0,0,0,0,38	195	149	8.68084e-09	7.20249e-06	1.0,1.0,1.0,1.0,1.0,1.0,1.0,1.0	1.0,1.0,1.0,1.0,0.903	0.019	SE
4435	Choren_v00_mik.OX359192.1G587	NA	chrOX359192.1	-	4809921	4809963	4809581	4809725	4810709	4810851	4435	1,6,16,7,3,6,44,1	0,4,9,6,0,5,0,0	5,1,13,19,5	0,0,0,0,0	191	149	3.95821e-08	2.98557e-05	1.0,0.539,0.581,0.476,1.0,0.484,1.0,1.0	1.0,1.0,1.0,1.0,1.0	-0.24	SE
954	Choren_v00_mik.OX359199.1G1010	NA	chrOX359199.1	+	6863891	6863951	6863783	6863826	6864268	6864308	954	1,175,1156,50,372,102,24,24	0,7,76,4,42,13,0,0	52,18,40,416,10	2,0,0,4,2	209	149	1.30075e-07	8.99363e-05	1.0,0.947,0.916,0.899,0.863,0.848,1.0,1.0	0.949,1.0,1.0,0.987,0.781	-0.009	SE
8150	Choren_v00_mik.OX359196.1G354	NA	chrOX359196.1	-	2346066	2346156	2345742	2345867	2346863	2346999	8150	0,11,15,2,4,2,7,2	5,187,940,138,190,140,93,219	2,10,21,29,8	104,64,380,358,212	239	149	2.31587e-07	0.000147806	0.0,0.035,0.01,0.009,0.013,0.009,0.045,0.006	0.012,0.089,0.033,0.048,0.023	-0.025	SE
7242	Choren_v00_mik.OX359198.1G1038	NA	chrOX359198.1	+	7598379	7598467	7598111	7598269	7598529	7598825	7242	2.22582e+21	0,0,4,1,0,0,1,2	336,50,241,287,103	3,0,24,0,3	237	149	2.55553e-07	0.000151452	1.0,1.0,0.992,0.993,1.0,1.0,0.996,0.988	0.986,1.0,0.863,1.0,0.956	0.035	SE
6123	Choren_v00_mik.OX359193.1G107	NA	chrOX359193.1	-	420577	420653	419929	420179	420723	420982	6123	6.31497e+21	0,1,4,4,10,0,0,7	222,82,330,324,201	4,3,18,13,5	225	149	3.03952e-07	0.000167947	1.0,0.995,0.994,0.978,0.954,1.0,1.0,0.946	0.974,0.948,0.924,0.943,0.964	0.033	SE
447	Choren_v00_mik.OX359201.1G571	NA	chrOX359201.1	-	4431626	4431724	4431306	4431347	4432992	4433098	447	1,168,317,111,89,88,196,113	0,1,18,1,8,1,2,1	166,35,230,530,208	3,4,21,29,41	247	149	3.2402e-07	0.000167947	1.0,0.99,0.914,0.985,0.87,0.982,0.983,0.986	0.971,0.841,0.869,0.917,0.754	0.093	SE
5348	Choren_v00_mik.OX359192.1G271	NA	chrOX359192.1	-	1654497	1654541	1654144	1654247	1654730	1654816	5348	0,0,160,0,0,0,0,0	2.10875e+21	13,0,0,0,0	114,91,287,244,151	193	149	3.44112e-07	0.000167947	0.0,0.0,0.141,0.0,0.0,0.0,0.0,0.0	0.081,0.0,0.0,0.0,0.0	0.001	SE
6325	Choren_v00_mik.OX359193.1G294	NA	chrOX359193.1	-	1519756	1519812	1518976	1519034	1520823	1520910	6325	2,43,227,61,37,30,51,35	0,5,2,0,33,2,2,20	33,13,114,64,105	0,0,3,0,2	205	149	6.82596e-07	0.000312422	1.0,0.862,0.988,1.0,0.449,0.916,0.949,0.56	1.0,1.0,0.965,1.0,0.974	-0.147	SE
8457	Choren_v00_mik.OX359196.1G1086	NA	chrOX359196.1	+	7199590	7199676	7199014	7199083	7200042	7200133	8457	4,110,316,187,80,142,111,155	0,0,3,0,0,0,0,0	78,95,454,640,407	2,0,6,2,29	235	149	7.15441e-07	0.000312422	1.0,1.0,0.985,1.0,1.0,1.0,1.0,1.0	0.961,1.0,0.98,0.995,0.899	0.031	SE
1697	Choren_v00_mik.OX359197.1G1018	NA	chrOX359197.1	-	7158966	7159064	7158357	7158493	7159196	7159523	1697	2,33,89,45,45,30,174,45	0,0,2,0,6,0,9,3	62,18,52,55,40	7,0,11,14,12	247	149	7.62811e-07	0.000316452	1.0,1.0,0.964,1.0,0.819,1.0,0.921,0.9	0.842,1.0,0.74,0.703,0.668	0.16	SE
7846	Choren_v00_mik.OX359195.1G920	NA	chrOX359195.1	+	6650392	6650558	6649941	6650194	6651021	6651138	7846	2,42,82,33,58,72,48,60	0,1,1,0,5,0,0,0	33,23,67,49,36	0,0,6,5,5	298	149	1.20345e-06	0.000453002	1.0,0.955,0.976,1.0,0.853,1.0,1.0,1.0	1.0,1.0,0.848,0.831,0.783	0.081	SE
2135	Choren_v00_mik.OX359192.1G1388	NA	chrOX359192.1	+	8893112	8893175	8892928	8893008	8893261	8893371	2135	2,26,134,40,69,26,43,20	6.38211e+22	63,13,47,64,35	404113296286174	212	149	1.25645e-06	0.000453002	0.19,0.046,0.078,0.062,0.093,0.063,0.05,0.045	0.099,0.075,0.1,0.136,0.124	-0.028	SE
5978	Choren_v00_mik.OX359195.1G10	NA	chrOX359195.1	+	48011	48117	47755	47851	48170	48263	5978	2,40,4,11,5,17,42,34	0,0,0,0,0,0,0,0	35,26,134,118,80	0,0,0,29,0	255	149	1.27031e-06	0.000453002	1.0,1.0,1.0,1.0,1.0,1.0,1.0,1.0	1.0,1.0,1.0,0.704,1.0	0.059	SE
6551	Choren_v00_mik.OX359197.1G418	NA	chrOX359197.1	+	2599982	2600092	2599694	2599737	2601260	2601535	6551	4.19658e+21	1,11,38,12,0,4,2,6	157,45,240,236,198	13,3,18,17,32	259	149	1.31036e-06	0.000453002	0.697,0.911,0.897,0.913,1.0,0.957,0.991,0.921	0.874,0.896,0.885,0.889,0.781	0.046	SE
5674	Choren_v00_mik.OX359195.1G1272	NA	chrOX359195.1	-	8385285	8385570	8385131	8385224	8385791	8386015	5674	1,108,906,101,145,147,112,39	0,47,1,0,2,2,58,72	1741001152568890	0,0,0,9,15	298	149	1.37505e-06	0.000456353	1.0,0.535,0.998,1.0,0.973,0.974,0.491,0.213	1.0,1.0,1.0,0.969,0.968	-0.214	SE
7012	Choren_v00_mik.OX359200.1G62	NA	chrOX359200.1	-	213947	214056	213782	213844	214109	214158	7012	2.22967e+21	0,0,21,0,2,0,22,1	137,61,273,356,185	0,0,3,0,0	258	149	1.63125e-06	0.000520557	1.0,1.0,0.948,1.0,0.982,1.0,0.863,0.987	1.0,1.0,0.981,1.0,1.0	-0.024	SE
1917	Choren_v00_mik.OX359197.1G425	NA	chrOX359197.1	-	2652793	2652881	2652558	2652653	2652956	2653015	1917	2,152,372,159,144,83,200,99	0,1,0,0,0,0,2,0	86,31,128,254,125	0,2,5,13,2	237	149	2.26827e-06	0.00069703	1.0,0.99,1.0,1.0,1.0,1.0,0.984,1.0	1.0,0.907,0.942,0.925,0.975	0.047	SE
4076	Choren_v00_mik.OX359189.1G1570	NA	chrOX359189.1	-	9714429	9714501	9714187	9714271	9714598	9714752	4076	5,4,56,39,6,60,38,17	0,0,2,0,13,0,9,5	28,42,62,76,19	1,0,0,0,0	221	149	3.84763e-06	0.00111138	1.0,1.0,0.95,1.0,0.237,1.0,0.74,0.696	0.95,1.0,1.0,1.0,1.0	-0.162	SE
7623	Choren_v00_mik.OX359199.1G833	NA	chrOX359199.1	-	5948835	5948876	5948671	5948768	5949004	5949210	7623	1,7,18,64,42,45,14,18	0,0,0,0,0,5,0,0	1,11,233,38,3	0,0,18,3,0	190	149	3.88453e-06	0.00111138	1.0,1.0,1.0,1.0,1.0,0.876,1.0,1.0	1.0,1.0,0.91,0.909,1.0	0.021	SE
2663	Choren_v00_mik.OX359191.1G929	NA	chrOX359191.1	-	7633970	7634026	7633792	7633901	7634080	7634140	2663	2.2981e+22	0,0,0,0,0,0,0,0	143,64,155,397,40	8,0,0,18,0	205	149	4.59067e-06	0.00125729	1.0,1.0,1.0,1.0,1.0,1.0,1.0,1.0	0.929,1.0,1.0,0.941,1.0	0.026	SE
718	Choren_v00_mik.OX359200.1G541	NA	chrOX359200.1	-	3848371	3848413	3847903	3848044	3848563	3848671	718	2,10,65,10,13,17,6,10	0,0,0,0,0,0,0,0	8,9,107,33,139	0,0,6,0,12	191	149	4.6976e-06	0.00125729	1.0,1.0,1.0,1.0,1.0,1.0,1.0,1.0	1.0,1.0,0.933,1.0,0.9	0.033	SE
6320	Choren_v00_mik.OX359193.1G286	NA	chrOX359193.1	+	1460494	1460575	1460329	1460413	1460772	1461029	6320	2,58,178,48,48,46,82,51	0,4,22,0,1,1,0,0	34,49,47,16,6	0,0,0,0,0	230	149	5.35711e-06	0.001389	1.0,0.904,0.84,1.0,0.969,0.968,1.0,1.0	1.0,1.0,1.0,1.0,1.0	-0.04	SE
2220	Choren_v00_mik.OX359195.1G1230	NA	chrOX359195.1	-	8226839	8226951	8226599	8226713	8227148	8227230	2220	1,71,252,48,74,81,109,48	0,0,0,0,0,0,0,0	70,23,388,142,1072	2,0,6,0,27	261	149	7.04387e-06	0.001771	1.0,1.0,1.0,1.0,1.0,1.0,1.0,1.0	0.952,1.0,0.974,1.0,0.958	0.023	SE
5568	Choren_v00_mik.OX359195.1G563	NA	chrOX359195.1	+	4584518	4584649	4576217	4576307	4593499	4593760	5568	3.40819e+22	0,7,51,4,14,1,0,0	155,12,132,196,47	2,0,0,0,0	280	149	1.03155e-05	0.00251728	1.0,0.969,0.953,0.958,0.926,0.982,1.0,1.0	0.976,1.0,1.0,1.0,1.0	-0.022	SE
6788	Choren_v00_mik.OX359199.1G724	NA	chrOX359199.1	-	5270897	5271047	5270686	5270839	5271120	5271207	6788	6.30085e+21	0,13,68,9,3,11,1,6	2.53126e+17	9,1,28,14,34	298	149	1.07174e-05	0.00254065	1.0,0.92,0.862,0.919,0.967,0.905,0.989,0.943	0.934,0.984,0.961,0.976,0.941	-0.021	SE
1718	Choren_v00_mik.OX359197.1G938	NA	chrOX359197.1	+	6681839	6682188	6681347	6681484	6682607	6682685	1718	2,25,40,25,15,36,63,54	0,2,3,0,0,0,2,0	31,23,161,58,176	2,0,7,0,19	298	149	1.19906e-05	0.00271651	1.0,0.862,0.87,1.0,1.0,1.0,0.94,1.0	0.886,1.0,0.92,1.0,0.822	0.033	SE
6386	Choren_v00_mik.OX359196.1G772	NA	chrOX359196.1	-	5620173	5620285	5619990	5620088	5620485	5620613	6386	5,210,1148,60,416,157,322,145	0,2,12,0,6,6,2,5	169,44,202,177,31	8,0,16,6,0	261	149	1.21141e-05	0.00271651	1.0,0.984,0.982,1.0,0.975,0.937,0.989,0.943	0.923,1.0,0.878,0.944,1.0	0.027	SE
5936	Choren_v00_mik.OX359192.1G1359	NA	chrOX359192.1	+	8738293	8738371	8738114	8738164	8738645	8738730	5936	4.34244e+21	0,17,10,1,2,8,12,3	2.60124e+16	5,1,13,4,27	227	149	1.26452e-05	0.00276098	1.0,0.93,0.966,0.99,0.978,0.943,0.959,0.968	0.972,0.988,0.982,0.99,0.987	-0.017	SE
3497	Choren_v00_mik.OX359201.1G851	NA	chrOX359201.1	-	6155433	6155574	6155035	6155162	6155630	6155892	3497	2.46321e+22	0,3,32,2,14,1,3,5	312113777861582	19,4,6,41,7	290	149	1.35317e-05	0.00281387	1.0,0.988,0.972,0.985,0.949,0.995,0.984,0.974	0.894,0.936,0.985,0.915,0.977	0.039	SE
6985	Choren_v00_mik.OX359195.1G558	NA	chrOX359195.1	-	4459367	4459583	4458680	4458694	4463513	4463566	6985	1.33736e+22	0,0,54,0,0,0,0,0	376,37,678,508,863	0,0,0,2,10	298	149	1.35657e-05	0.00281387	1.0,1.0,0.857,1.0,1.0,1.0,1.0,1.0	1.0,1.0,1.0,0.992,0.977	-0.012	SE
3495	Choren_v00_mik.OX359201.1G851	NA	chrOX359201.1	-	6155226	6155373	6155035	6155162	6155630	6155892	3495	5.40025e+22	0,3,32,2,14,1,3,5	313,57,875,729,727	19,4,6,41,7	296	149	1.44073e-05	0.00291554	1.0,0.985,0.975,0.975,0.96,0.989,0.967,0.983	0.892,0.878,0.987,0.9,0.981	0.052	SE
723	Choren_v00_mik.OX359202.1G550	NA	chrOX359202.1	+	4062860	4063011	4062533	4062726	4067229	4067371	723	1.22507e+22	0,0,0,2,0,7,38,1	222,124,183,149,60	0,0,0,0,0	298	149	1.91587e-05	0.00378476	1.0,1.0,1.0,0.988,1.0,0.949,0.887,0.993	1.0,1.0,1.0,1.0,1.0	-0.023	SE
1142	Choren_v00_mik.OX359199.1G578	NA	chrOX359199.1	-	4416206	4416522	4415511	4415669	4416601	4416739	1142	7,105,670,84,77,128,171,112	0,0,24,0,2,1,8,0	95,36,84,93,139	1,0,0,0,0	298	149	2.4302e-05	0.00468915	1.0,1.0,0.933,1.0,0.951,0.985,0.914,1.0	0.979,1.0,1.0,1.0,1.0	-0.023	SE
3130	Choren_v00_mik.OX359190.1G1146	NA	chrOX359190.1	+	8297420	8297489	8297283	8297314	8297632	8297909	3130	1,31,25,11,118,17,120,82	0,0,0,0,0,0,0,0	91,38,15,15,35	0,0,30,29,0	218	149	2.51501e-05	0.00474251	1.0,1.0,1.0,1.0,1.0,1.0,1.0,1.0	1.0,1.0,0.255,0.261,1.0	0.297	SE
5749	Choren_v00_mik.OX359198.1G893	NA	chrOX359198.1	+	6809555	6809702	6808605	6808685	6809848	6809974	5749	11,89,913,139,166,175,114,101	0,3,12,1,9,11,2,2	89,21,48,78,17	0,0,0,0,0	296	149	3.11149e-05	0.00573689	1.0,0.937,0.975,0.986,0.903,0.889,0.966,0.962	1.0,1.0,1.0,1.0,1.0	-0.048	SE
7420	Choren_v00_mik.OX359194.1G865	NA	chrOX359194.1	-	7116252	7116372	7111488	7114611	7116813	7116901	7420	0,4,18,3,5,8,2,4	2,14,112,3,7,30,16,40	3,2,0,0,0	12,15,33,20,5	269	149	3.32699e-05	0.00589103	0.0,0.137,0.082,0.356,0.283,0.129,0.065,0.052	0.122,0.069,0.0,0.0,0.0	0.1	SE
7563	Choren_v00_mik.OX359194.1G1112	NA	chrOX359194.1	-	8489939	8490037	8489486	8489667	8490302	8490581	7563	2,38,183,64,24,29,36,64	0,2,30,0,1,0,0,0	42,27,70,38,10	0,0,3,0,0	247	149	3.33709e-05	0.00589103	1.0,0.92,0.786,1.0,0.935,1.0,1.0,1.0	1.0,1.0,0.934,1.0,1.0	-0.032	SE
8359	Choren_v00_mik.OX359196.1G867	NA	chrOX359196.1	-	6112467	6112542	6112244	6112336	6112742	6112779	8359	2.28759e+21	0,5,8,6,3,0,0,0	198,43,243,220,148	2,0,7,11,7	224	149	3.71778e-05	0.00642633	1.0,0.974,0.98,0.969,0.978,1.0,1.0,1.0	0.985,1.0,0.958,0.93,0.934	0.026	SE
506	Choren_v00_mik.OX359201.1G336	NA	chrOX359201.1	+	1955599	1955697	1955425	1955462	1955896	1956022	506	1,81,887,12,278,35,112,176	0,3,0,0,0,0,0,64	157,16,509,22,45	0,0,0,0,0	247	149	4.42129e-05	0.00748641	1.0,0.942,1.0,1.0,1.0,1.0,1.0,0.624	1.0,1.0,1.0,1.0,1.0	-0.054	SE
1140	Choren_v00_mik.OX359199.1G583	NA	chrOX359199.1	+	4486976	4487017	4486680	4486886	4487163	4487260	1140	4.42912e+22	0,2,13,0,0,1,2,4	540,60,311,272,179	11,0,6,12,4	190	149	5.30833e-05	0.00871503	1.0,0.994,0.986,1.0,1.0,0.995,0.995,0.982	0.975,1.0,0.976,0.947,0.972	0.02	SE
7106	Choren_v00_mik.OX359194.1G232	NA	chrOX359194.1	-	1969470	1969549	1968982	1969335	1969851	1970064	7106	9,212,155,218,2509,472,467,73	0,6,0,0,40,4,3,0	133,17,63,67,269	0,0,0,1,26	228	149	5.35695e-05	0.00871503	1.0,0.958,1.0,1.0,0.976,0.987,0.99,1.0	1.0,1.0,1.0,0.978,0.871	0.019	SE
3421	Choren_v00_mik.OX359191.1G331	NA	chrOX359191.1	-	2098449	2098532	2097609	2097666	2098605	2098746	3421	2,87,253,50,65,74,87,50	0,12,0,0,0,9,10,6	33,33,125,87,110	0,6,0,0,0	232	149	5.5078e-05	0.00878812	1.0,0.823,1.0,1.0,1.0,0.841,0.848,0.843	1.0,0.779,1.0,1.0,1.0	-0.036	SE
5775	Choren_v00_mik.OX359190.1G784	NA	chrOX359190.1	-	5141246	5141378	5137622	5137709	5142173	5142295	5775	10,232,528,166,287,88,280,278	0,0,22,0,0,0,14,0	317,68,293,191,313	1,0,2,0,0	281	149	8.75398e-05	0.0137041	1.0,1.0,0.927,1.0,1.0,1.0,0.914,1.0	0.994,1.0,0.987,1.0,1.0	-0.016	SE
8080	Choren_v00_mik.OX359196.1G120	NA	chrOX359196.1	+	712317	712362	711063	711370	712541	712662	8080	7.24372e+21	0,7,28,14,5,0,2,4	398109523338574	0,0,0,9,0	194	149	9.47256e-05	0.0145544	1.0,0.964,0.951,0.946,0.986,1.0,0.995,0.984	1.0,1.0,1.0,0.966,1.0	-0.015	SE
2631	Choren_v00_mik.OX359191.1G972	NA	chrOX359191.1	-	7808708	7808818	7808035	7808187	7809283	7809380	2631	5,55,207,41,34,51,28,59	0,0,1,0,0,0,0,0	57,9,175,175,171	0,0,7,6,5	259	149	0.000103779	0.0156555	1.0,1.0,0.992,1.0,1.0,1.0,1.0,1.0	1.0,1.0,0.935,0.944,0.952	0.033	SE
6068	Choren_v00_mik.OX359193.1G6	NA	chrOX359193.1	-	24110	24194	23935	24006	24256	24341	6068	3.22677e+21	0,1,2,2,2,0,3,4	2.2212e+16	0,0,35,0,34	233	149	0.000111834	0.0165694	1.0,0.993,0.996,0.986,0.986,1.0,0.988,0.964	1.0,1.0,0.966,1.0,0.967	0.003	SE
6999	Choren_v00_mik.OX359196.1G722	NA	chrOX359196.1	-	5462144	5462195	5460739	5460836	5463081	5463144	6999	1,130,313,132,112,92,197,76	0,2,45,0,0,3,2,0	115,33,45,56,22	4,0,0,0,0	200	149	0.000115523	0.0168156	1.0,0.98,0.838,1.0,1.0,0.958,0.987,1.0	0.955,1.0,1.0,1.0,1.0	-0.021	SE
4089	Choren_v00_mik.OX359189.1G222	NA	chrOX359189.1	-	1113860	1113987	1113407	1113604	1114447	1114522	4089	1,78,199,49,65,53,25,59	0,1,22,0,0,0,0,3	54,27,95,70,73	4,0,0,0,0	276	149	0.000126051	0.0180319	1.0,0.977,0.83,1.0,1.0,1.0,1.0,0.914	0.879,1.0,1.0,1.0,1.0	-0.011	SE
8272	Choren_v00_mik.OX359193.1G265	NA	chrOX359193.1	-	1264215	1264281	1263991	1264069	1264383	1264500	8272	0,17,87,43,16,8,35,87	3,0,84,56,0,0,0,0	28,6,9,4,2	83,2,0,24,8	215	149	0.000170265	0.0239438	0.0,1.0,0.418,0.347,1.0,1.0,1.0,1.0	0.189,0.675,1.0,0.104,0.148	0.297	SE
6928	Choren_v00_mik.OX359199.1G893	NA	chrOX359199.1	+	6305529	6305639	6305190	6305310	6305700	6305766	6928	2,61,136,60,59,24,15,1	0,0,0,0,4,0,0,0	7,10,157,17,28	0,0,13,0,0	259	149	0.000191368	0.026463	1.0,1.0,1.0,1.0,0.895,1.0,1.0,1.0	1.0,1.0,0.874,1.0,1.0	0.012	SE
3264	Choren_v00_mik.OX359190.1G425	NA	chrOX359190.1	-	2825164	2825267	2824899	2824978	2825825	2825902	3264	1.7139e+22	0,0,264,0,2,0,0,0	739,115,181,76,283	0,0,0,0,0	252	149	0.000214441	0.0291675	1.0,1.0,0.689,1.0,0.993,1.0,1.0,1.0	1.0,1.0,1.0,1.0,1.0	-0.04	SE
3250	Choren_v00_mik.OX359195.1G1246	NA	chrOX359195.1	+	8300691	8300744	8300549	8300632	8300804	8300841	3250	3,90,204,83,47,96,263,73	0,7,13,0,17,4,1,0	80,24,38,142,38	0,5,18,23,5	202	149	0.000234214	0.0313431	1.0,0.905,0.92,1.0,0.671,0.947,0.995,1.0	1.0,0.78,0.609,0.82,0.849	0.118	SE
3340	Choren_v00_mik.OX359190.1G836	NA	chrOX359190.1	-	6208725	6208776	6206919	6207055	6217980	6218090	3340	3,159,594,146,94,146,144,94	0,5,29,3,2,8,1,2	134,66,60,94,19	5,0,0,0,0	200	149	0.000238115	0.0313593	1.0,0.959,0.938,0.973,0.972,0.931,0.991,0.972	0.952,1.0,1.0,1.0,1.0	-0.023	SE
2462	Choren_v00_mik.OX359192.1G1191	NA	chrOX359192.1	+	7895966	7896014	7895690	7895799	7896223	7896369	2462	4,27,113,51,57,73,44,49	0,4,10,1,4,4,3,1	78,23,22,118,10	0,0,0,5,0	197	149	0.000242867	0.0314855	1.0,0.836,0.895,0.975,0.915,0.932,0.917,0.974	1.0,1.0,1.0,0.947,1.0	-0.059	SE
3969	Choren_v00_mik.OX359195.1G1014	NA	chrOX359195.1	+	7117241	7117490	7117012	7117071	7117700	7117841	3969	3,16,99,205,59,74,68,78	0,0,0,6,0,0,16,0	38,21,37,40,17	0,0,0,0,1	298	149	0.000281597	0.0359448	1.0,1.0,1.0,0.945,1.0,1.0,0.68,1.0	1.0,1.0,1.0,1.0,0.895	-0.026	SE
6162	Choren_v00_mik.OX359194.1G866	NA	chrOX359194.1	+	7126921	7127050	7126491	7126761	7127705	7127866	6162	1,37,172,34,45,40,53,50	2,86,208,61,69,54,38,51	42,56,1457,236,1101	33,47,157,289,94	278	149	0.000295905	0.0371988	0.211,0.187,0.307,0.23,0.259,0.284,0.428,0.344	0.406,0.39,0.833,0.304,0.863	-0.278	SE
330	Choren_v00_mik.OX359201.1G916	NA	chrOX359201.1	-	6439218	6439302	6438947	6439155	6439504	6439706	330	2,229,1088,125,183,153,90,48	0,9,17,0,4,3,0,8	59,37,203,213,110	0,0,3,0,0	233	149	0.000312058	0.0386006	1.0,0.942,0.976,1.0,0.967,0.97,1.0,0.793	1.0,1.0,0.977,1.0,1.0	-0.039	SE
8351	Choren_v00_mik.OX359196.1G819	NA	chrOX359196.1	+	5910197	5910308	5910004	5910139	5910383	5910488	8351	1.12274e+22	0,0,1,2,0,0,0,0	229,90,697,232,638	0,1,19,0,11	260	149	0.000319802	0.0386006	1.0,1.0,0.996,0.991,1.0,1.0,1.0,1.0	1.0,0.981,0.955,1.0,0.971	0.017	SE
4677	Choren_v00_mik.OX359191.1G1007	NA	chrOX359191.1	+	8075208	8075400	8073744	8073936	8075610	8075811	4677	4,89,540,4,50,201,52,46	0,3,0,0,0,0,3,0	166,70,211,85,32	0,0,0,51,2	298	149	0.000321013	0.0386006	1.0,0.937,1.0,1.0,1.0,1.0,0.897,1.0	1.0,1.0,1.0,0.455,0.889	0.11	SE
6683	Choren_v00_mik.OX359193.1G995	NA	chrOX359193.1	-	6416770	6416908	6416467	6416647	6417068	6417133	6683	8.50312e+22	0,18,51,4,15,7,13,15	345128332152167	16,8,13,12,20	287	149	0.000328991	0.0389876	1.0,0.936,0.926,0.976,0.948,0.961,0.952,0.907	0.918,0.893,0.93,0.868,0.813	0.066	SE
7521	Choren_v00_mik.OX359192.1G648	NA	chrOX359192.1	+	5222458	5222595	5221755	5222151	5222697	5222848	7521	2,87,277,79,42,76,111,53	0,0,6,1,0,2,2,0	146,40,62,118,28	6,0,2,7,3	286	149	0.000333629	0.0389876	1.0,1.0,0.96,0.976,1.0,0.952,0.967,1.0	0.927,1.0,0.942,0.898,0.829	0.063	SE
7714	Choren_v00_mik.OX359195.1G461	NA	chrOX359195.1	+	3079923	3079968	3079754	3079867	3080166	3080339	7714	4.23446e+21	0,4,29,11,3,11,8,3	234,66,193,237,80	3,4,2,3,1	194	149	0.000396114	0.0456467	1.0,0.978,0.924,0.938,0.979,0.933,0.963,0.985	0.984,0.927,0.987,0.984,0.984	-0.011	SE
7948	Choren_v00_mik.OX359195.1G1129	NA	chrOX359195.1	+	7786164	7786219	7785894	7786003	7786526	7786587	7948	5,131,123,103,180,104,2,55	0,0,0,0,0,0,0,0	108,39,85,28,122	0,6,0,0,10	204	149	0.000440061	0.0500162	1.0,1.0,1.0,1.0,1.0,1.0,1.0,1.0	1.0,0.826,1.0,1.0,0.899	0.055	SE
7092	Choren_v00_mik.OX359195.1G833	NA	chrOX359195.1	-	6244135	6244342	6243371	6243453	6244402	6244450	7092	6.71719e+22	0,2,6,0,6,0,3,0	333183616804467	1,0,12,4,15	298	149	0.000514882	0.0571367	1.0,0.994,0.994,1.0,0.98,1.0,0.987,1.0	0.994,1.0,0.963,0.99,0.94	0.017	SE
7617	Choren_v00_mik.OX359195.1G1135	NA	chrOX359195.1	-	7801716	7801789	7801233	7801440	7801935	7802030	7617	2.46191e+23	0,2,4,0,0,5,2,0	314,50,71,111,276	0,0,13,7,0	222	149	0.000516482	0.0571367	1.0,0.995,0.995,1.0,1.0,0.984,0.988,1.0	1.0,1.0,0.786,0.914,1.0	0.055	SE
1554	Choren_v00_mik.OX359198.1G404	NA	chrOX359198.1	-	2608926	2608975	2608520	2608596	2610408	2610539	1554	2,216,512,142,177,197,125,93	0,0,14,2,0,2,1,0	125,27,96,159,34	1,0,9,2,7	198	149	0.000551654	0.0602247	1.0,1.0,0.965,0.982,1.0,0.987,0.989,1.0	0.989,1.0,0.889,0.984,0.785	0.061	SE
6534	Choren_v00_mik.OX359197.1G418	NA	chrOX359197.1	+	2566915	2567140	2565290	2565414	2567452	2567559	6534	1,88,386,77,122,64,71,75	0,0,18,0,5,0,0,0	65,40,288,204,160	0,0,11,11,27	298	149	0.000625999	0.0674534	1.0,1.0,0.915,1.0,0.924,1.0,1.0,1.0	1.0,1.0,0.929,0.903,0.748	0.064	SE
4091	Choren_v00_mik.OX359189.1G222	NA	chrOX359189.1	-	1113860	1113990	1113407	1113604	1114447	1114522	4091	3,126,351,77,98,92,62,94	0,1,22,0,0,0,0,3	83,49,172,108,106	4,0,0,0,0	279	149	0.000682831	0.072634	1.0,0.985,0.895,1.0,1.0,1.0,1.0,0.944	0.917,1.0,1.0,1.0,1.0	-0.005	SE
6513	Choren_v00_mik.OX359194.1G1061	NA	chrOX359194.1	+	8300680	8300721	8300392	8300474	8301130	8301237	6513	3.19072e+21	0,12,81,17,27,17,32,8	198127249293238	25,15,50,43,49	190	149	0.00080779	0.0848384	1.0,0.925,0.875,0.899,0.873,0.898,0.792,0.928	0.861,0.869,0.796,0.842,0.792	0.067	SE
7400	Choren_v00_mik.OX359196.1G455	NA	chrOX359196.1	+	4033088	4033216	4032184	4032225	4034505	4034596	7400	8.31483e+21	0,4,8,2,21,8,8,8	358113398342296	6,2,4,0,0	277	149	0.000889612	0.0922639	1.0,0.977,0.982,0.991,0.903,0.939,0.977,0.971	0.97,0.968,0.982,1.0,1.0	-0.016	SE
8316	Choren_v00_mik.OX359190.1G718	NA	chrOX359190.1	+	4664758	4664836	4657236	4657315	4665427	4665495	8316	2.14136e+21	0,15,61,18,4,7,2,7	135,66,357,350,264	7,2,65,38,51	227	149	0.000923551	0.0946013	1.0,0.861,0.796,0.899,0.971,0.933,0.986,0.936	0.927,0.956,0.783,0.858,0.773	0.063	SE
5330	Choren_v00_mik.OX359201.1G581	NA	chrOX359201.1	-	4485351	4485468	4482953	4484029	4488508	4488575	5330	4,67,385,40,18,38,63,89	0,2,12,2,0,0,0,5	74,41,42,69,49	0,0,0,0,0	266	149	0.000961608	0.0972983	1.0,0.949,0.947,0.918,1.0,1.0,1.0,0.909	1.0,1.0,1.0,1.0,1.0	-0.035	SE
1531	Choren_v00_mik.OX359200.1G240	NA	chrOX359200.1	+	1092463	1092519	1091794	1091838	1093286	1093494	1531	1.23094e+21	0,3,6,3,0,2,0,0	134,67,365,280,259	0,1,20,2,2	205	149	0.000987039	0.0986682	1.0,0.982,0.991,0.981,1.0,0.986,1.0,1.0	1.0,0.98,0.93,0.99,0.989	0.015	SE
219	Choren_v00_mik.OX359202.1G307	NA	chrOX359202.1	-	1409646	1409697	1409504	1409552	1410226	1410302	219	4.14031e+21	0,3,42,3,6,3,1,3	84,36,88,48,61	0,3,19,11,8	200	149	0.0010555	0.104255	1.0,0.972,0.848,0.975,0.927,0.974,0.987,0.963	1.0,0.899,0.775,0.765,0.85	0.098	SE
75	Choren_v00_mik.OX359202.1G781	NA	chrOX359202.1	-	5564084	5564126	5563409	5563516	5566917	5567073	75	1,98,250,61,99,15,53,63	0,0,2,0,0,0,0,0	77,37,34,95,23	0,0,14,0,1	191	149	0.0010794	0.105362	1.0,1.0,0.99,1.0,1.0,1.0,1.0,1.0	1.0,1.0,0.655,1.0,0.947	0.078	SE
3744	Choren_v00_mik.OX359198.1G815	NA	chrOX359198.1	+	6146848	6146935	6146441	6146581	6147043	6147150	3744	4,80,723,7,93,17,64,38	0,14,4,7,4,2,2,19	27,8,56,91,31	0,0,1,6,0	236	149	0.00110145	0.106264	1.0,0.783,0.991,0.387,0.936,0.843,0.953,0.558	1.0,1.0,0.972,0.905,1.0	-0.169	SE
6037	Choren_v00_mik.OX359192.1G1385	NA	chrOX359192.1	+	8861651	8861783	8861330	8861592	8862374	8862447	6037	5.27955e+21	0,8,6,4,3,0,14,3	135108172191245	8,0,0,0,0	281	149	0.00121949	0.1163	1.0,0.949,0.98,0.955,0.957,1.0,0.897,0.954	0.899,1.0,1.0,1.0,1.0	-0.018	SE
5094	Choren_v00_mik.OX359191.1G64	NA	chrOX359191.1	-	328677	328859	328326	328455	329663	329862	5094	1,43,66,44,44,68,32,31	0,0,0,1,0,0,0,0	30,14,52,26,8	3,0,7,0,0	298	149	0.00130108	0.122671	1.0,1.0,1.0,0.957,1.0,1.0,1.0,1.0	0.833,1.0,0.788,1.0,1.0	0.07	SE
8437	Choren_v00_mik.OX359196.1G1073	NA	chrOX359196.1	-	7094735	7095048	7093551	7094441	7095171	7095415	8437	2,15,153,56,36,56,27,18	0,0,0,0,0,0,0,0	23,13,95,55,57	0,0,1,0,11	298	149	0.00140611	0.131084	1.0,1.0,1.0,1.0,1.0,1.0,1.0,1.0	1.0,1.0,0.979,1.0,0.722	0.06	SE
5230	Choren_v00_mik.OX359192.1G163	NA	chrOX359192.1	+	904789	904860	904247	904549	904980	905251	5230	1,39,175,51,46,39,86,54	0,0,0,0,1,0,0,0	46,24,25,54,21	2,0,2,2,5	220	149	0.0014773	0.136191	1.0,1.0,1.0,1.0,0.969,1.0,1.0,1.0	0.94,1.0,0.894,0.948,0.74	0.092	SE
3568	Choren_v00_mik.OX359189.1G373	NA	chrOX359189.1	-	1980863	1980894	1978283	1978327	1981874	1981929	3568	1,49,63,23,84,17,62,11	0,12,23,10,18,8,14,5	19,12,16,1,10	12,2,26,5,36	180	149	0.00151188	0.137846	1.0,0.772,0.694,0.656,0.794,0.638,0.786,0.646	0.567,0.832,0.337,0.142,0.187	0.335	SE
2922	Choren_v00_mik.OX359196.1G420	NA	chrOX359196.1	+	3777889	3778041	3777666	3777780	3778347	3778390	2922	4,206,1229,132,270,95,205,93	0,0,3,0,0,0,0,0	143,44,381,245,411	0,0,12,9,0	298	149	0.00156248	0.140912	1.0,1.0,0.995,1.0,1.0,1.0,1.0,1.0	1.0,1.0,0.941,0.932,1.0	0.025	SE
1639	Choren_v00_mik.OX359198.1G168	NA	chrOX359198.1	-	939287	939671	938265	938652	939986	940151	1639	3.18155e+21	0,1,6,0,3,0,21,0	183,44,133,100,50	0,0,0,0,0	298	149	0.00161187	0.143803	1.0,0.989,0.979,1.0,0.977,1.0,0.865,1.0	1.0,1.0,1.0,1.0,1.0	-0.024	SE
175	Choren_v00_mik.OX359202.1G441	NA	chrOX359202.1	-	2363699	2363949	2360369	2360533	2368353	2368395	175	1,27,79,16,17,16,29,26	0,0,6,0,0,0,1,2	9,14,63,56,89	0,1,6,4,4	298	149	0.00168987	0.149158	1.0,1.0,0.868,1.0,1.0,1.0,0.935,0.867	1.0,0.875,0.84,0.875,0.918	0.057	SE
5922	Choren_v00_mik.OX359192.1G1193	NA	chrOX359192.1	-	7892285	7892394	7891878	7892035	7892468	7892543	5922	4,39,293,45,45,49,61,22	0,1,6,0,16,7,5,0	53,16,95,60,53	0,0,0,4,3	258	149	0.00179817	0.157046	1.0,0.957,0.966,1.0,0.619,0.802,0.876,1.0	1.0,1.0,1.0,0.897,0.911	-0.059	SE
7784	Choren_v00_mik.OX359195.1G690	NA	chrOX359195.1	+	5334417	5334465	5334179	5334347	5334955	5335142	7784	4,101,191,70,116,27,81,85	0,0,0,0,33,0,0,1	108,39,401,236,266	0,0,7,0,6	197	149	0.0018325	0.158378	1.0,1.0,1.0,1.0,0.727,1.0,1.0,0.985	1.0,1.0,0.977,1.0,0.971	-0.026	SE
3460	Choren_v00_mik.OX359192.1G210	NA	chrOX359192.1	-	1270917	1270974	1270826	1270859	1271132	1271276	3460	0,1,13,0,0,2,0,0	2,22,272,20,54,27,29,40	9,7,1,8,0	52,7,67,139,23	206	149	0.0019151	0.162506	0.0,0.032,0.033,0.0,0.0,0.051,0.0,0.0	0.111,0.42,0.011,0.04,0.0	-0.102	SE
5618	Choren_v00_mik.OX359189.1G718	NA	chrOX359189.1	-	4754991	4755021	4754489	4754552	4756138	4756249	5618	11,208,0,126,267,195,421,109	0,0,287,68,0,2,1,49	97,44,68,0,66	53,30,22,67,0	179	149	0.00191943	0.162506	1.0,1.0,0.0,0.607,1.0,0.988,0.997,0.649	0.604,0.55,0.72,0.0,1.0	0.205	SE
1149	Choren_v00_mik.OX359199.1G577	NA	chrOX359199.1	-	4375288	4375385	4374694	4374793	4375457	4375567	1149	8,20,194,26,45,20,48,29	0,0,2,0,0,0,2,0	44,10,527,215,527	4,0,12,5,4	246	149	0.00214473	0.179746	1.0,1.0,0.983,1.0,1.0,1.0,0.936,1.0	0.869,1.0,0.964,0.963,0.988	0.033	SE
6506	Choren_v00_mik.OX359202.1G820	NA	chrOX359202.1	-	5810345	5810441	5807283	5808396	5810613	5810763	6506	8.25365e+21	0,0,0,0,0,0,0,6	94,83,539,466,507	50,0,0,0,0	245	149	0.00224819	0.186532	1.0,1.0,1.0,1.0,1.0,1.0,1.0,0.953	0.533,1.0,1.0,1.0,1.0	0.088	SE
8160	Choren_v00_mik.OX359196.1G429	NA	chrOX359196.1	-	3837047	3837088	3836529	3836705	3837201	3837243	8160	7.5131e+22	0,11,65,10,27,8,12,18	329,205,153,485,83	5,2,11,5,6	190	149	0.00227124	0.186579	1.0,0.973,0.926,0.959,0.909,0.979,0.974,0.944	0.981,0.988,0.916,0.987,0.916	0	SE
566	Choren_v00_mik.OX359201.1G143	NA	chrOX359201.1	-	645039	645093	644733	644932	645299	645394	566	1,18,95,8,10,9,6,12	0,0,0,0,0,0,0,0	9,9,249,93,338	0,0,19,0,0	203	149	0.0023453	0.190774	1.0,1.0,1.0,1.0,1.0,1.0,1.0,1.0	1.0,1.0,0.906,1.0,1.0	0.019	SE
324	Choren_v00_mik.OX359201.1G921	NA	chrOX359201.1	+	6470451	6470494	6470169	6470331	6470558	6470626	324	3,85,278,123,100,53,141,51	0,8,24,8,3,8,15,7	75,11,231,143,145	12,0,32,35,21	192	149	0.00247539	0.199401	1.0,0.892,0.9,0.923,0.963,0.837,0.879,0.85	0.829,1.0,0.849,0.76,0.843	0.049	SE
3937	Choren_v00_mik.OX359189.1G692	NA	chrOX359189.1	+	4652127	4652244	4648846	4648894	4655174	4655270	3937	1.15897e+21	0,6,11,3,4,8,5,4	283,132,174,564,82	2,2,0,4,0	266	149	0.00252132	0.201148	1.0,0.937,0.98,0.977,0.971,0.942,0.975,0.98	0.988,0.974,1.0,0.987,1.0	-0.02	SE
2925	Choren_v00_mik.OX359191.1G270	NA	chrOX359191.1	-	1687529	1687656	1687389	1687451	1687957	1688122	2925	7,72,150,71,3,101,147,18	0,0,24,0,0,0,0,0	149,25,27,16,1	4,0,0,0,0	276	149	0.00266533	0.210612	1.0,1.0,0.771,1.0,1.0,1.0,1.0,1.0	0.953,1.0,1.0,1.0,1.0	-0.019	SE
3459	Choren_v00_mik.OX359198.1G497	NA	chrOX359198.1	-	4037273	4037327	4037137	4037219	4059463	4059612	3459	1.36111e+24	0,18,44,44,11,18,22,26	4.56204e+17	34,0,116,43,117	203	149	0.00274197	0.214624	1.0,0.961,0.961,0.906,0.977,0.945,0.972,0.944	0.908,1.0,0.922,0.96,0.939	0.012	SE
8430	Choren_v00_mik.OX359202.1G921	NA	chrOX359202.1	-	6362031	6362169	6361894	6361969	6362296	6362386	8430	1,193,286,118,97,140,126,93	0,3,12,0,3,2,0,2	53,74,358,451,55	0,0,0,0,0	287	149	0.00315444	0.244602	1.0,0.971,0.925,1.0,0.944,0.973,1.0,0.96	1.0,1.0,1.0,1.0,1.0	-0.028	SE
8367	Choren_v00_mik.OX359196.1G882	NA	chrOX359196.1	-	6172844	6173030	6172509	6172636	6173210	6173294	8367	2,97,336,136,68,91,108,57	0,0,12,0,9,0,2,0	92,52,129,108,92	3,0,12,6,6	298	149	0.00336485	0.258502	1.0,1.0,0.933,1.0,0.791,1.0,0.964,1.0	0.939,1.0,0.843,0.9,0.885	0.048	SE
7696	Choren_v00_mik.OX359196.1G1238	NA	chrOX359196.1	+	7977486	7977626	7977325	7977408	7977685	7977836	7696	4,90,341,47,47,82,48,42	0,1,21,0,2,1,3,0	74,34,165,94,178	0,0,3,0,5	289	149	0.00344954	0.262577	1.0,0.979,0.893,1.0,0.924,0.977,0.892,1.0	1.0,1.0,0.966,1.0,0.948	-0.025	SE
3406	Choren_v00_mik.OX359196.1G171	NA	chrOX359196.1	-	1073661	1073724	1073513	1073558	1074002	1074116	3406	2,126,208,179,46,118,215,104	0,7,38,12,10,4,7,16	98,60,39,127,69	12,0,12,37,29	212	149	0.00377774	0.284944	1.0,0.927,0.794,0.913,0.764,0.954,0.956,0.82	0.852,1.0,0.696,0.707,0.626	0.115	SE
5235	Choren_v00_mik.OX359190.1G1183	NA	chrOX359190.1	-	8558298	8558423	8557838	8557902	8558876	8558982	5235	1.58068e+23	0,0,0,0,0,0,0,2	291140202588186	0,0,0,23,0	274	149	0.00393102	0.293835	1.0,1.0,1.0,1.0,1.0,1.0,1.0,0.989	1.0,1.0,1.0,0.933,1.0	0.012	SE
7849	Choren_v00_mik.OX359194.1G1138	NA	chrOX359194.1	-	8637897	8637995	8637771	8637838	8638061	8638190	7849	1.47891e+24	0,14,8,8,4,20,20,0	376127430447335	8,0,2,0,4	247	149	0.00411261	0.304664	1.0,0.971,0.988,0.969,0.986,0.957,0.97,1.0	0.966,1.0,0.992,1.0,0.981	-0.008	SE
584	Choren_v00_mik.OX359202.1G564	NA	chrOX359202.1	-	4117945	4117994	4117661	4117724	4118062	4118124	584	2,107,319,129,114,56,92,94	0,0,10,5,4,1,0,1	144,35,19,40,23	7,0,0,10,1	198	149	0.00436481	0.320485	1.0,1.0,0.96,0.951,0.955,0.977,1.0,0.986	0.939,1.0,1.0,0.751,0.945	0.052	SE
3910	Choren_v00_mik.OX359192.1G319	NA	chrOX359192.1	-	1943722	1943836	1943172	1943242	1944470	1944563	3910	8.57895e+30	2.80216e+22	2.66795e+18	277,79,109,181,69	263	149	0.00479394	0.346383	0.96,0.848,0.905,0.857,0.914,0.87,0.841,0.931	0.845,0.872,0.947,0.909,0.94	-0.012	SE
8332	Choren_v00_mik.OX359196.1G784	NA	chrOX359196.1	-	5682628	5682720	5682362	5682545	5682915	5682979	8332	7.35785e+21	0,7,70,6,22,8,10,6	209,315,87,86,20	8,4,1,7,0	241	149	0.00480102	0.346383	1.0,0.969,0.882,0.959,0.896,0.96,0.938,0.949	0.942,0.98,0.982,0.884,1.0	-0.013	SE
4434	Choren_v00_mik.OX359192.1G587	NA	chrOX359192.1	-	4809921	4809963	4809581	4809725	4810312	4810338	4434	1,41,71,36,29,19,197,3	0,2,1,2,2,0,0,4	11,16,66,44,61	0,0,16,0,4	191	149	0.00489792	0.350328	1.0,0.941,0.982,0.934,0.919,1.0,1.0,0.369	1.0,1.0,0.763,1.0,0.922	-0.044	SE
4943	Choren_v00_mik.OX359193.1G235	NA	chrOX359193.1	-	1062005	1062143	1061212	1061263	1062549	1062741	4943	3,153,216,128,68,100,161,45	0,1,2,0,0,0,5,0	116,34,160,206,43	1,1,9,2,1	287	149	0.0050412	0.357494	1.0,0.988,0.982,1.0,1.0,1.0,0.944,1.0	0.984,0.946,0.902,0.982,0.957	0.035	SE
7226	Choren_v00_mik.OX359196.1G1207	NA	chrOX359196.1	-	7806346	7806431	7806046	7806136	7808240	7808337	7226	1,39,65,52,55,58,136,38	0,2,11,11,0,0,6,0	54,16,73,46,59	4,1,11,3,19	234	149	0.00531003	0.373367	1.0,0.925,0.79,0.751,1.0,1.0,0.935,1.0	0.896,0.911,0.809,0.907,0.664	0.088	SE
4330	Choren_v00_mik.OX359193.1G1239	NA	chrOX359193.1	-	7625105	7625174	7624911	7625032	7625243	7625356	4330	2,189,760,52,219,75,99,127	0,5,36,0,10,0,2,4	118,26,257,122,162	0,0,9,0,4	218	149	0.00573553	0.397303	1.0,0.963,0.935,1.0,0.937,1.0,0.971,0.956	1.0,1.0,0.951,1.0,0.965	-0.013	SE
4421	Choren_v00_mik.OX359189.1G549	NA	chrOX359189.1	+	3078743	3078921	3077828	3077943	3088766	3089004	4421	4.35715e+22	0,0,33,8,2,3,2,4	201,43,148,325,41	0,0,0,1,4	298	149	0.00574621	0.397303	1.0,1.0,0.957,0.937,0.994,0.976,0.988,0.959	1.0,1.0,1.0,0.994,0.837	0.01	SE
6976	Choren_v00_mik.OX359193.1G1465	NA	chrOX359193.1	+	8698453	8698540	8698335	8698377	8698894	8699096	6976	1,56,344,97,106,91,130,195	1.65214e+22	96,21,149,173,110	274144280426217	236	149	0.00590155	0.400295	0.387,0.051,0.138,0.146,0.117,0.114,0.131,0.319	0.181,0.084,0.251,0.204,0.242	-0.017	SE
5916	Choren_v00_mik.OX359192.1G1189	NA	chrOX359192.1	-	7851977	7852043	7851609	7851689	7852150	7852421	5916	4.3011e+22	0,7,16,4,0,6,5,6	298,42,185,131,96	9,4,2,6,3	215	149	0.00592264	0.400295	1.0,0.968,0.978,0.983,1.0,0.971,0.989,0.973	0.958,0.879,0.985,0.938,0.957	0.039	SE
5763	Choren_v00_mik.OX359199.1G921	NA	chrOX359199.1	-	6410882	6411053	6410668	6410767	6411225	6411389	5763	2,132,278,155,87,147,167,126	0,5,30,0,5,2,0,0	79,91,76,72,91	2,0,1,2,2	298	149	0.00593422	0.400295	1.0,0.93,0.822,1.0,0.897,0.974,1.0,1.0	0.952,1.0,0.974,0.947,0.958	-0.013	SE
4068	Choren_v00_mik.OX359192.1G1360	NA	chrOX359192.1	-	8719841	8719894	8719393	8719543	8719993	8720123	4068	4.28558e+21	0,2,5,1,0,1,3,3	170,98,165,259,184	3,0,7,9,1	202	149	0.00610484	0.408483	1.0,0.991,0.988,0.992,1.0,0.994,0.987,0.968	0.977,1.0,0.946,0.955,0.993	0.016	SE
5886	Choren_v00_mik.OX359192.1G1161	NA	chrOX359192.1	-	7737544	7737680	7737045	7737239	7737864	7737992	5886	2,113,525,176,81,175,107,180	0,0,0,2,0,0,0,1	141,28,66,78,49	0,0,2,10,0	285	149	0.00643751	0.427296	1.0,1.0,1.0,0.979,1.0,1.0,1.0,0.989	1.0,1.0,0.945,0.803,1.0	0.046	SE
2618	Choren_v00_mik.OX359191.1G1014	NA	chrOX359191.1	-	8119661	8119803	8119401	8119503	8119914	8119991	2618	5,27,138,29,227,171,48,110	0,1,2,0,0,1,2,0	199,5,93,46,158	6,0,0,1,6	291	149	0.00654091	0.429876	1.0,0.933,0.972,1.0,1.0,0.989,0.925,1.0	0.944,1.0,1.0,0.959,0.931	0.011	SE
1172	Choren_v00_mik.OX359199.1G504	NA	chrOX359199.1	+	3877125	3877187	3876925	3876976	3878188	3878251	1172	2.23095e+21	0,0,13,0,4,0,0,0	232,56,2365,910,2828	0,1,38,7,33	211	149	0.00658	0.429876	1.0,1.0,0.981,1.0,0.981,1.0,1.0,1.0	1.0,0.975,0.978,0.989,0.984	0.01	SE
8109	Choren_v00_mik.OX359196.1G198	NA	chrOX359196.1	+	1224205	1224301	1223903	1224015	1225845	1225951	8109	2,76,211,146,67,132,180,102	0,0,20,0,1,0,4,0	86,61,82,252,108	0,4,0,0,2	245	149	0.00671757	0.435435	1.0,1.0,0.865,1.0,0.976,1.0,0.965,1.0	1.0,0.903,1.0,1.0,0.97	0.001	SE
5386	Choren_v00_mik.OX359202.1G666	NA	chrOX359202.1	-	4905466	4905503	4905300	4905399	4906666	4906793	5386	1.25491e+24	0,28,126,36,28,22,22,30	260206619571524	14,10,50,30,115	186	149	0.00692148	0.445175	1.0,0.94,0.885,0.883,0.925,0.961,0.977,0.902	0.937,0.943,0.908,0.938,0.785	0.032	SE
894	Choren_v00_mik.OX359199.1G1180	NA	chrOX359199.1	+	7575648	7575765	7575401	7575470	7576004	7576084	894	1.12466e+22	0,3,5,2,6,3,11,4	299,94,146,349,45	2,0,0,1,0	266	149	0.00770692	0.49188	1.0,0.979,0.986,0.988,0.952,0.981,0.964,0.971	0.988,1.0,1.0,0.995,1.0	-0.019	SE
6576	Choren_v00_mik.OX359193.1G809	NA	chrOX359193.1	+	5275678	5275744	5274648	5274743	5276121	5276306	6576	2,20,402,82,61,75,93,43	0,0,1,0,0,1,0,4	57,21,64,91,60	0,0,8,2,2	215	149	0.00829014	0.525063	1.0,1.0,0.996,1.0,1.0,0.981,1.0,0.882	1.0,1.0,0.847,0.969,0.954	0.028	SE
716	Choren_v00_mik.OX359200.1G541	NA	chrOX359200.1	-	3848151	3848239	3847903	3848044	3848563	3848671	716	1,12,114,28,41,14,23,41	0,0,0,0,0,0,0,0	37,17,445,81,267	0,0,6,0,12	237	149	0.00903483	0.566276	1.0,1.0,1.0,1.0,1.0,1.0,1.0,1.0	1.0,1.0,0.979,1.0,0.933	0.018	SE
8128	Choren_v00_mik.OX359196.1G295	NA	chrOX359196.1	+	1935376	1935445	1934887	1935296	1935573	1935617	8128	5,180,539,97,81,174,119,132	0,0,14,2,0,2,2,5	411228220513107	7,0,16,10,11	218	149	0.00907735	0.566276	1.0,1.0,0.963,0.971,1.0,0.983,0.976,0.947	0.976,1.0,0.904,0.972,0.869	0.036	SE
8024	Choren_v00_mik.OX359195.1G1248	NA	chrOX359195.1	+	8309800	8309842	8309520	8309733	8309914	8310203	8024	7,375,47,281,39,49,35,46	0,0,35,0,0,0,0,0	61,85,207,15,146	0,0,0,0,0	191	149	0.00948764	0.587455	1.0,1.0,0.512,1.0,1.0,1.0,1.0,1.0	1.0,1.0,1.0,1.0,1.0	-0.061	SE
926	Choren_v00_mik.OX359199.1G1048	NA	chrOX359199.1	+	7044574	7044630	7042626	7042675	7045838	7046164	926	4.26664e+21	0,1,0,0,4,0,2,0	184123368563350	0,0,13,0,14	205	149	0.00962884	0.588488	1.0,0.995,1.0,1.0,0.979,1.0,0.987,1.0	1.0,1.0,0.954,1.0,0.948	0.015	SE
650	Choren_v00_mik.OX359200.1G829	NA	chrOX359200.1	-	5980937	5981031	5980447	5980660	5981155	5981253	650	19,98,12,111,87,103,397,8	0,11,0,0,0,0,0,9	156,20,5,6,8	0,0,0,0,0	243	149	0.00964617	0.588488	1.0,0.845,1.0,1.0,1.0,1.0,1.0,0.353	1.0,1.0,1.0,1.0,1.0	-0.1	SE
2227	Choren_v00_mik.OX359191.1G206	NA	chrOX359191.1	+	1227466	1227565	1226294	1226405	1229421	1229611	2227	1,42,111,39,25,25,65,28	0,9,54,8,3,3,1,14	12,22,6,56,9	7,5,8,28,3	248	149	0.00995934	0.603158	1.0,0.737,0.553,0.745,0.834,0.834,0.975,0.546	0.507,0.726,0.311,0.546,0.643	0.231	SE
6754	Choren_v00_mik.OX359193.1G1091	NA	chrOX359193.1	+	6987873	6987953	6987691	6987752	6988016	6988163	6754	5,149,608,94,141,103,137,119	0,6,10,0,0,0,0,0	151,42,1276,546,1105	1,0,22,5,24	229	149	0.0100619	0.604954	1.0,0.942,0.975,1.0,1.0,1.0,1.0,1.0	0.99,1.0,0.974,0.986,0.968	0.006	SE
295	Choren_v00_mik.OX359201.1G991	NA	chrOX359201.1	-	6799949	6800094	6799560	6799763	6800233	6800401	295	2.32774e+21	0,4,6,5,3,5,16,3	234,61,293,215,226	4,0,0,3,1	294	149	0.0102308	0.610684	1.0,0.976,0.984,0.974,0.985,0.972,0.945,0.957	0.967,1.0,1.0,0.973,0.991	-0.012	SE
4962	Choren_v00_mik.OX359189.1G574	NA	chrOX359189.1	-	3233644	3233710	3232396	3232609	3235623	3235788	4962	6.52021e+22	0,29,107,21,12,35,42,36	495,99,386,292,166	31,19,35,22,14	215	149	0.0103889	0.61569	1.0,0.926,0.933,0.933,0.961,0.897,0.882,0.9	0.917,0.783,0.884,0.902,0.892	0.053	SE
1514	Choren_v00_mik.OX359198.1G556	NA	chrOX359198.1	-	4465864	4466086	4462601	4462995	4466872	4467019	1514	3,20,100,30,36,18,19,27	0,0,2,6,1,2,3,0	18,10,29,13,22	0,0,2,0,0	298	149	0.0110723	0.651539	1.0,1.0,0.962,0.714,0.947,0.818,0.76,1.0	1.0,1.0,0.879,1.0,1.0	-0.076	SE
7196	Choren_v00_mik.OX359192.1G975	NA	chrOX359192.1	+	6778177	6778257	6776676	6776720	6781444	6781505	7196	4,62,421,26,38,55,85,21	0,0,9,0,0,0,12,2	55,14,15,143,8	3,0,1,0,0	229	149	0.0113504	0.663197	1.0,1.0,0.968,1.0,1.0,1.0,0.822,0.872	0.923,1.0,0.907,1.0,1.0	-0.008	SE
1891	Choren_v00_mik.OX359199.1G831	NA	chrOX359199.1	-	5936442	5936531	5935956	5936154	5936657	5936829	1891	6.17115e+22	0,0,11,0,0,0,0,2	268,240,276,166,80	2,0,1,14,2	238	149	0.0119698	0.694502	1.0,1.0,0.988,1.0,1.0,1.0,1.0,0.992	0.988,1.0,0.994,0.881,0.962	0.032	SE
7823	Choren_v00_mik.OX359195.1G841	NA	chrOX359195.1	-	6276672	6276874	6276161	6276222	6277163	6277402	7823	3.38311e+22	0,2,11,2,0,1,1,2	128,83,541,621,458	2,0,11,3,8	298	149	0.0122743	0.707224	1.0,0.99,0.981,0.981,1.0,0.995,0.994,0.979	0.97,1.0,0.961,0.99,0.966	0.013	SE
3941	Choren_v00_mik.OX359189.1G692	NA	chrOX359189.1	+	4656583	4656629	4655174	4655270	4660629	4660673	3941	1,87,618,179,123,168,269,230	0,3,14,1,1,3,2,0	218,79,145,375,34	8,1,10,2,3	195	149	0.0123765	0.708194	1.0,0.957,0.971,0.993,0.989,0.977,0.99,1.0	0.954,0.984,0.917,0.993,0.896	0.036	SE
5204	Choren_v00_mik.OX359190.1G746	NA	chrOX359190.1	-	4871876	4872243	4859981	4860116	4872392	4872546	5204	4,220,770,157,190,150,68,273	0,5,44,4,13,8,58,32	70,57,332,341,280	26,8,38,43,40	298	149	0.012996	0.738546	1.0,0.957,0.897,0.952,0.88,0.904,0.37,0.81	0.574,0.781,0.814,0.799,0.778	0.097	SE
787	Choren_v00_mik.OX359200.1G316	NA	chrOX359200.1	-	1439889	1440056	1438598	1438768	1440114	1440287	787	0,0,8,2,0,4,0,6	3,49,80,4,32,27,38,12	2,0,1,2,3	25,18,224,67,187	298	149	0.0143982	0.812667	0.0,0.0,0.048,0.2,0.0,0.069,0.0,0.2	0.038,0.0,0.002,0.015,0.008	0.052	SE
1580	Choren_v00_mik.OX359198.1G370	NA	chrOX359198.1	+	2177857	2177930	2176463	2176524	2179672	2179809	1580	1,120,261,102,90,91,287,108	0,1,12,6,0,0,12,2	83,43,63,180,18	0,4,0,3,0	222	149	0.014698	0.823984	1.0,0.988,0.936,0.919,1.0,1.0,0.941,0.973	1.0,0.878,1.0,0.976,1.0	-0.001	SE
6052	Choren_v00_mik.OX359197.1G59	NA	chrOX359197.1	-	264039	264085	257621	257896	264698	264766	6052	0,1,24,4,0,0,1,0	1,61,246,90,119,37,155,82	0,0,1,2,0	120,12,36,72,10	195	149	0.0152147	0.847225	0.0,0.012,0.069,0.033,0.0,0.0,0.005,0.0	0.0,0.0,0.021,0.021,0.0	0.006	SE
6365	Choren_v00_mik.OX359191.1G1034	NA	chrOX359191.1	+	8241693	8241790	8241533	8241574	8241911	8242069	6365	4,96,237,38,135,31,87,81	0,1,1,0,1,0,2,0	75,19,140,170,163	0,0,5,0,9	246	149	0.0157753	0.872584	1.0,0.983,0.993,1.0,0.988,1.0,0.963,1.0	1.0,1.0,0.944,1.0,0.916	0.019	SE
5203	Choren_v00_mik.OX359190.1G746	NA	chrOX359190.1	-	4871657	4871763	4859981	4860116	4872392	4872546	5203	4.26189e+21	0,5,44,4,13,8,58,32	523150466453475	26,8,38,43,40	255	149	0.0159734	0.877693	1.0,0.968,0.922,0.979,0.931,0.949,0.833,0.86	0.922,0.916,0.878,0.86,0.874	0.04	SE
6793	Choren_v00_mik.OX359193.1G1141	NA	chrOX359193.1	+	7210471	7210559	7210189	7210325	7210638	7210842	6793	1,6,129,16,20,39,18,11	0,0,0,0,0,2,0,0	9,14,145,75,214	0,0,0,8,5	237	149	0.016222	0.885487	1.0,1.0,1.0,1.0,1.0,0.925,1.0,1.0	1.0,1.0,1.0,0.855,0.964	0.027	SE
256	Choren_v00_mik.OX359202.1G84	NA	chrOX359202.1	+	407313	407404	406297	406477	407572	407758	256	2,112,189,161,84,72,226,69	0,4,4,1,2,2,8,0	58,83,268,182,179	2,0,16,3,9	240	149	0.0165954	0.899946	1.0,0.946,0.967,0.99,0.963,0.957,0.946,1.0	0.947,1.0,0.912,0.974,0.925	0.02	SE
4086	Choren_v00_mik.OX359202.1G226	NA	chrOX359202.1	-	926966	927135	924410	924515	927616	927747	4086	2.35711e+22	0,8,11,1,6,8,2,0	230,86,502,302,502	0,0,5,2,2	298	149	0.0176662	0.951793	1.0,0.957,0.98,0.992,0.971,0.942,0.988,1.0	1.0,1.0,0.98,0.987,0.992	-0.013	SE
5755	Choren_v00_mik.OX359195.1G1264	NA	chrOX359195.1	-	8328490	8328539	8328327	8328438	8328875	8329066	5755	2,27,156,57,53,44,29,42	0,0,35,9,7,1,4,2	47,18,161,165,128	3,0,18,7,4	198	149	0.0182853	0.977563	1.0,1.0,0.77,0.827,0.851,0.971,0.845,0.94	0.922,1.0,0.871,0.947,0.96	-0.039	SE
7171	Choren_v00_mik.OX359200.1G21	NA	chrOX359200.1	-	34187	34210	34024	34132	34273	34497	7171	2,89,386,63,113,85,75,64	0,0,2,0,3,0,0,4	105,22,457,212,549	0,0,6,2,19	172	149	0.0183801	0.977563	1.0,1.0,0.994,1.0,0.97,1.0,1.0,0.933	1.0,1.0,0.985,0.989,0.962	0	SE
2730	Choren_v00_mik.OX359192.1G810	NA	chrOX359192.1	-	5993955	5993992	5993708	5993732	5994061	5994099	2730	9.43295e+22	0,5,6,5,2,5,15,0	359112301366218	4,2,12,3,5	186	149	0.0185801	0.981905	1.0,0.986,0.992,0.987,0.994,0.983,0.982,1.0	0.986,0.978,0.953,0.99,0.972	0.015	SE
7713	Choren_v00_mik.OX359195.1G461	NA	chrOX359195.1	+	3079923	3079968	3079602	3079699	3080166	3080339	7713	2,86,199,100,82,97,157,135	0,2,17,1,1,0,5,0	103,25,84,109,33	0,0,0,0,5	194	149	0.0191824	1	1.0,0.971,0.9,0.987,0.984,1.0,0.96,1.0	1.0,1.0,1.0,1.0,0.835	0.008	SE
3572	Choren_v00_mik.OX359197.1G110	NA	chrOX359197.1	+	540832	540893	540583	540710	541324	541385	3572	1.16324e+21	0,13,25,18,0,8,15,12	87,61,42,105,15	2,0,8,2,0	210	149	0.0198437	1	1.0,0.899,0.87,0.907,1.0,0.932,0.904,0.942	0.969,1.0,0.788,0.974,1.0	-0.014	SE
3752	Choren_v00_mik.OX359193.1G480	NA	chrOX359193.1	+	2900244	2900350	2894408	2894498	2901622	2901725	3752	2.1975e+21	0,1,3,2,2,0,0,0	147,44,592,273,817	2,1,15,3,4	255	149	0.0202428	1	1.0,0.991,0.99,0.979,0.978,1.0,1.0,1.0	0.977,0.963,0.958,0.982,0.992	0.018	SE
6410	Choren_v00_mik.OX359193.1G479	NA	chrOX359193.1	+	2859042	2859151	2858106	2858174	2859831	2859921	6410	2,71,663,152,193,206,252,284	0,1,39,7,9,6,19,19	161,81,394,347,226	2,4,15,7,14	258	149	0.02045	1	1.0,0.976,0.908,0.926,0.925,0.952,0.885,0.896	0.979,0.921,0.938,0.966,0.903	-0.008	SE
2638	Choren_v00_mik.OX359191.1G1276	NA	chrOX359191.1	+	9409713	9409798	9409554	9409651	9409856	9409947	2638	1.55161e+24	0,3,24,17,12,10,27,1	5832427641720340	7,5,27,43,4	234	149	0.0209852	1	1.0,0.991,0.975,0.961,0.974,0.975,0.971,0.996	0.981,0.969,0.947,0.962,0.982	0.012	SE
1410	Choren_v00_mik.OX359198.1G854	NA	chrOX359198.1	-	6542948	6543143	6541658	6541787	6543442	6543608	1410	1,70,683,76,50,52,35,36	0,22,2,10,41,8,20,0	56,16,70,77,253	1,0,8,16,0	298	149	0.0222412	1	1.0,0.614,0.994,0.792,0.379,0.765,0.467,1.0	0.966,1.0,0.814,0.706,1.0	-0.146	SE
6246	Choren_v00_mik.OX359193.1G1366	NA	chrOX359193.1	-	8231311	8231375	8231128	8231253	8231465	8231610	6246	4,98,354,103,138,162,210,49	0,3,10,3,2,0,10,3	273,25,103,43,21	10,0,2,11,2	213	149	0.0233136	1	1.0,0.958,0.961,0.96,0.98,1.0,0.936,0.92	0.95,1.0,0.973,0.732,0.88	0.057	SE
4095	Choren_v00_mik.OX359189.1G222	NA	chrOX359189.1	-	1114447	1114522	1113860	1113990	1114709	1114852	4095	2,88,379,61,58,73,95,65	0,2,11,2,9,0,0,0	62,34,126,113,65	1,0,16,0,7	224	149	0.0235421	1	1.0,0.967,0.958,0.953,0.811,1.0,1.0,1.0	0.976,1.0,0.84,1.0,0.861	0.026	SE
7444	Choren_v00_mik.OX359194.1G922	NA	chrOX359194.1	+	7443198	7443378	7442807	7442886	7444067	7444231	7444	1,89,623,97,223,116,141,125	0,0,3,0,0,0,0,0	103,10,1904,391,2016	0,0,11,0,30	298	149	0.0236993	1	1.0,1.0,0.99,1.0,1.0,1.0,1.0,1.0	1.0,1.0,0.989,1.0,0.971	0.007	SE
6538	Choren_v00_mik.OX359197.1G418	NA	chrOX359197.1	+	2575492	2575552	2572704	2572854	2575851	2575952	6538	1,71,313,27,70,48,44,68	0,2,8,0,4,0,0,0	38,14,141,196,95	0,0,0,3,16	209	149	0.0239007	1	1.0,0.962,0.965,1.0,0.926,1.0,1.0,1.0	1.0,1.0,1.0,0.979,0.809	0.024	SE
2609	Choren_v00_mik.OX359195.1G955	NA	chrOX359195.1	-	6777886	6777980	6777041	6777251	6778917	6779143	2609	2.13932e+21	0,17,11,20,15,10,11,5	123,63,100,217,105	17,6,22,11,16	243	149	0.0243832	1	1.0,0.834,0.947,0.768,0.857,0.909,0.891,0.953	0.816,0.866,0.736,0.924,0.801	0.066	SE
1959	Choren_v00_mik.OX359197.1G305	NA	chrOX359197.1	+	1733962	1734009	1733333	1733479	1734172	1734248	1959	1.73145e+22	0,1,0,1,0,0,0,1	277,25,4,6,59	0,0,0,13,1	196	149	0.0253443	1	1.0,0.996,1.0,0.996,1.0,1.0,1.0,0.994	1.0,1.0,1.0,0.26,0.978	0.151	SE
8023	Choren_v00_mik.OX359195.1G1233	NA	chrOX359195.1	-	8238048	8238121	8237737	8237874	8238239	8238411	8023	1.13301e+23	0,1,10,2,1,2,4,6	359159876463691	4,2,6,16,6	222	149	0.0261191	1	1.0,0.996,0.985,0.992,0.996,0.991,0.99,0.972	0.984,0.982,0.99,0.951,0.987	0.011	SE
303	Choren_v00_mik.OX359201.1G975	NA	chrOX359201.1	+	6721048	6721133	6720878	6720990	6721200	6721402	303	3.65717e+23	0,0,4,2,6,4,2,18	4661523131040240	0,0,17,0,12	234	149	0.0264814	1	1.0,1.0,0.996,0.994,0.98,0.988,0.997,0.954	1.0,1.0,0.921,1.0,0.929	0.019	SE
8014	Choren_v00_mik.OX359195.1G1213	NA	chrOX359195.1	+	8182378	8182454	8182189	8182301	8182514	8182608	8014	4,92,181,155,96,67,104,167	0,1,3,7,1,2,0,0	85,78,34,38,6	11,1,0,0,0	225	149	0.027249	1	1.0,0.984,0.976,0.936,0.985,0.957,1.0,1.0	0.837,0.981,1.0,1.0,1.0	0.016	SE
7645	Choren_v00_mik.OX359196.1G1243	NA	chrOX359196.1	-	7991671	7991773	7991393	7991455	7991830	7991946	7645	6.12557e+21	0,1,4,2,2,4,1,4	75,63,217,135,111	5,0,6,3,2	251	149	0.0280451	1	1.0,0.987,0.988,0.974,0.971,0.95,0.993,0.962	0.899,1.0,0.955,0.964,0.971	0.02	SE
8265	Choren_v00_mik.OX359191.1G901	NA	chrOX359191.1	-	7475380	7475409	7472976	7473121	7475756	7475865	8265	1,88,130,124,84,65,66,105	0,4,3,3,11,2,4,0	67,61,60,156,40	1,0,5,2,0	178	149	0.0281643	1	1.0,0.948,0.973,0.972,0.865,0.965,0.932,1.0	0.982,1.0,0.909,0.985,1.0	-0.018	SE
1141	Choren_v00_mik.OX359199.1G578	NA	chrOX359199.1	-	4416206	4416383	4415511	4415669	4416468	4416522	1141	5,49,337,62,39,78,114,87	0,3,34,0,2,2,12,7	57,20,29,75,58	4,0,13,6,24	298	149	0.0294904	1	1.0,0.891,0.832,1.0,0.907,0.951,0.826,0.861	0.877,1.0,0.527,0.862,0.547	0.146	SE
7200	Choren_v00_mik.OX359192.1G975	NA	chrOX359192.1	+	6781444	6781505	6778177	6778257	6789110	6789285	7200	3,20,135,8,10,29,28,5	0,3,22,6,0,9,2,1	16,5,2,47,3	3,2,0,2,0	210	149	0.0299718	1	1.0,0.825,0.813,0.486,1.0,0.696,0.909,0.78	0.791,0.639,1.0,0.943,1.0	-0.061	SE
6749	Choren_v00_mik.OX359193.1G1083	NA	chrOX359193.1	-	6946633	6946720	6946139	6946231	6946823	6946913	6749	2.77523e+22	0,10,33,8,0,0,2,7	111,80,462,215,477	7,2,13,8,0	236	149	0.0324003	1	1.0,0.98,0.978,0.964,1.0,1.0,0.985,0.925	0.909,0.962,0.957,0.944,1.0	0.025	SE
5860	Choren_v00_mik.OX359192.1G1121	NA	chrOX359192.1	-	7584413	7584452	7584266	7584272	7584733	7584819	5860	2,55,293,54,98,20,94,84	0,23,44,0,14,4,8,2	96,16,93,48,48	1,6,8,0,4	188	149	0.0324876	1	1.0,0.655,0.841,1.0,0.847,0.798,0.903,0.971	0.987,0.679,0.902,1.0,0.905	-0.018	SE
1411	Choren_v00_mik.OX359198.1G850	NA	chrOX359198.1	-	6487351	6487406	6487043	6487272	6487485	6487682	1411	4,128,778,17,1061,19,93,27	0,2,14,0,0,0,0,0	31,1,58,47,12	0,0,4,4,1	204	149	0.0346548	1	1.0,0.979,0.976,1.0,1.0,1.0,1.0,1.0	1.0,1.0,0.914,0.896,0.898	0.053	SE
6710	Choren_v00_mik.OX359189.1G1269	NA	chrOX359189.1	-	8070483	8070657	8070244	8070388	8070970	8071141	6710	2,25,158,35,29,38,22,36	0,0,4,0,0,0,0,0	281,29,395,229,375	0,0,0,0,18	298	149	0.0349805	1	1.0,1.0,0.952,1.0,1.0,1.0,1.0,1.0	1.0,1.0,1.0,1.0,0.912	0.012	SE
6426	Choren_v00_mik.OX359191.1G1063	NA	chrOX359191.1	-	8365579	8365657	8365429	8365503	8365973	8366031	6426	4.17085e+21	0,0,16,2,0,4,11,0	228,61,148,141,97	1,0,4,0,0	227	149	0.0352397	1	1.0,1.0,0.972,0.984,1.0,0.967,0.944,1.0	0.993,1.0,0.96,1.0,1.0	-0.007	SE
5343	Choren_v00_mik.OX359194.1G200	NA	chrOX359194.1	-	1697179	1697228	1696735	1696809	1697587	1697673	5343	3,54,115,65,45,18,82,48	0,0,14,0,3,0,0,0	111,21,45,65,53	0,0,4,1,0	198	149	0.0368141	1	1.0,1.0,0.861,1.0,0.919,1.0,1.0,1.0	1.0,1.0,0.894,0.98,1.0	-0.002	SE
6550	Choren_v00_mik.OX359197.1G418	NA	chrOX359197.1	+	2599982	2600092	2594235	2594333	2601260	2601535	6550	2,93,202,115,115,75,227,55	0,5,11,4,0,2,0,3	63,30,95,116,89	4,0,1,7,9	259	149	0.0376998	1	1.0,0.915,0.914,0.943,1.0,0.956,1.0,0.913	0.901,1.0,0.982,0.905,0.851	0.027	SE
4893	Choren_v00_mik.OX359202.1G498	NA	chrOX359202.1	-	2857496	2857623	2854097	2854219	2862031	2862108	4893	1.71108e+28	0,9,56,16,13,3,10,4	6.2025e+16	3,0,20,23,16	276	149	0.037993	1	1.0,0.985,0.969,0.973,0.979,0.995,0.989,0.991	0.991,1.0,0.968,0.952,0.973	0.008	SE
16	Choren_v00_mik.OX359202.1G967	NA	chrOX359202.1	+	6545933	6546023	6545188	6545336	6546365	6546503	16	1.21306e+22	0,0,21,0,0,0,0,0	248,46,119,87,71	2,0,0,5,8	239	149	0.0393595	1	1.0,1.0,0.947,1.0,1.0,1.0,1.0,1.0	0.987,1.0,1.0,0.916,0.847	0.043	SE
3247	Choren_v00_mik.OX359195.1G1246	NA	chrOX359195.1	+	8300549	8300632	8300321	8300400	8300691	8300744	3247	2,113,329,108,51,113,303,87	0,3,17,11,24,9,24,3	114,35,64,206,49	8,0,5,11,0	232	149	0.0400755	1	1.0,0.96,0.926,0.863,0.577,0.89,0.89,0.949	0.901,1.0,0.892,0.923,1.0	-0.061	SE
4676	Choren_v00_mik.OX359191.1G1007	NA	chrOX359191.1	+	8074554	8074746	8073744	8073936	8075208	8075400	4676	13,27,1611,257,256,304,107,134	0,88,100,0,50,82,52,46	410,184,449,38,28	0,0,0,81,32	298	149	0.040239	1	1.0,0.133,0.89,1.0,0.719,0.65,0.507,0.593	1.0,1.0,1.0,0.19,0.304	-0.012	SE
6225	Choren_v00_mik.OX359193.1G193	NA	chrOX359193.1	-	856028	856181	855689	855809	856386	856477	6225	2,53,72,89,66,46,70,70	0,3,3,6,0,2,0,0	55,20,100,47,49	0,0,0,2,0	298	149	0.0402472	1	1.0,0.898,0.923,0.881,1.0,0.92,1.0,1.0	1.0,1.0,1.0,0.922,1.0	-0.032	SE
1712	Choren_v00_mik.OX359197.1G965	NA	chrOX359197.1	+	6855087	6855186	6854373	6854852	6855451	6855578	1712	0,28,378,69,49,41,60,55	3.24081e+21	25,9,17,70,47	123,50,236,132,277	248	149	0.0407975	1	0.0,0.066,0.218,0.16,0.134,0.117,0.132,0.194	0.109,0.098,0.041,0.242,0.093	0.011	SE
3060	Choren_v00_mik.OX359191.1G48	NA	chrOX359191.1	-	188936	189068	188331	188513	189121	189261	3060	7.35511e+22	0,3,56,2,6,5,11,10	312164446515160	5,6,10,6,0	281	149	0.0429408	1	1.0,0.984,0.91,0.987,0.974,0.978,0.962,0.962	0.971,0.935,0.959,0.979,1.0	0.001	SE
4629	Choren_v00_mik.OX359191.1G361	NA	chrOX359191.1	+	2295403	2295498	2292809	2293100	2296569	2296839	4629	5.3091e+22	0,31,37,2,0,9,0,0	299,59,514,369,578	0,0,4,26,0	244	149	0.0439068	1	1.0,0.859,0.945,0.99,1.0,0.91,1.0,1.0	1.0,1.0,0.987,0.897,1.0	-0.014	SE
2625	Choren_v00_mik.OX359191.1G990	NA	chrOX359191.1	-	7930129	7930321	7928084	7928180	7932386	7932559	2625	9.38387e+21	0,2,14,5,0,2,11,0	334109273360137	0,2,1,2,0	298	149	0.0447958	1	1.0,0.99,0.969,0.968,1.0,0.988,0.961,1.0	1.0,0.965,0.993,0.989,1.0	-0.005	SE
6741	Choren_v00_mik.OX359193.1G1081	NA	chrOX359193.1	-	6908306	6908480	6905394	6905466	6915310	6915417	6741	4.58229e+22	0,9,23,2,16,3,5,0	181,81,177,136,109	0,1,0,1,4	298	149	0.0452922	1	1.0,0.97,0.984,0.981,0.955,0.987,0.973,1.0	1.0,0.976,1.0,0.986,0.932	0.002	SE
2173	Choren_v00_mik.OX359192.1G692	NA	chrOX359192.1	+	5521844	5522114	5521526	5521729	5522198	5522388	2173	2.27475e+21	0,1,15,6,2,3,10,5	224104523599286	2,2,13,8,18	298	149	0.0459357	1	1.0,0.993,0.962,0.954,0.989,0.977,0.949,0.963	0.982,0.963,0.953,0.974,0.888	0.021	SE
3924	Choren_v00_mik.OX359192.1G81	NA	chrOX359192.1	+	402780	402851	402165	402318	402983	403072	3924	7.54519e+22	0,17,4,2,0,8,5,0	237,108,148,344,79	1,4,7,7,0	220	149	0.0460523	1	1.0,0.956,0.997,0.99,1.0,0.965,0.947,1.0	0.994,0.948,0.935,0.971,1.0	0.012	SE
7255	Choren_v00_mik.OX359192.1G741	NA	chrOX359192.1	+	5714089	5714160	5712248	5712357	5714225	5714327	7255	3.18213e+28	0,0,2,0,0,3,0,0	9.86722e+16	1,1,25,0,25	220	149	0.0473004	1	1.0,1.0,0.999,1.0,1.0,0.998,1.0,1.0	0.999,0.998,0.971,1.0,0.945	0.017	SE
1352	Choren_v00_mik.OX359198.1G972	NA	chrOX359198.1	-	7162906	7162964	7162458	7162806	7163164	7163208	1352	1,163,1197,23,374,162,67,63	0,45,355,21,43,35,23,20	54,46,76,57,20	6,1,16,22,2	207	149	0.0473165	1	1.0,0.723,0.708,0.441,0.862,0.769,0.677,0.694	0.866,0.971,0.774,0.651,0.878	-0.094	SE
3077	Choren_v00_mik.OX359191.1G1094	NA	chrOX359191.1	+	8545324	8545415	8544805	8544928	8545579	8545731	3077	2,47,193,34,263,7,54,48	0,0,8,2,0,0,9,2	11,13,192,39,202	0,0,9,0,16	240	149	0.0478233	1	1.0,1.0,0.937,0.913,1.0,1.0,0.788,0.937	1.0,1.0,0.93,1.0,0.887	-0.017	SE
8007	Choren_v00_mik.OX359195.1G1199	NA	chrOX359195.1	+	8153044	8153134	8151463	8151540	8154418	8154596	8007	2.10932e+21	0,0,3,0,9,4,5,0	116,42,144,201,99	0,0,0,0,0	239	149	0.0560305	1	1.0,1.0,0.985,1.0,0.905,0.952,0.956,1.0	1.0,1.0,1.0,1.0,1.0	-0.025	SE
2606	Choren_v00_mik.OX359195.1G955	NA	chrOX359195.1	-	6777886	6777980	6776422	6776567	6778559	6778620	2606	1,122,183,84,94,99,85,87	0,2,7,0,4,5,4,0	75,46,88,148,74	0,2,2,2,1	243	149	0.0567895	1	1.0,0.974,0.941,1.0,0.935,0.924,0.929,1.0	1.0,0.934,0.964,0.978,0.978	-0.008	SE
1201	Choren_v00_mik.OX359199.1G415	NA	chrOX359199.1	+	2643200	2643366	2638245	2638387	2649338	2649484	1201	1.32921e+23	0,10,36,2,12,7,0,2	112,92,364,488,261	0,0,7,6,9	298	149	0.0614328	1	1.0,0.936,0.948,0.975,0.923,0.946,1.0,0.986	1.0,1.0,0.963,0.976,0.935	-0.011	SE
2929	Choren_v00_mik.OX359191.1G1208	NA	chrOX359191.1	+	9155300	9155397	9155127	9155237	9155519	9155582	2929	0,82,49,139,82,108,172,118	2,0,0,1,6,3,6,0	71,3,44,124,35	0,0,0,0,0	246	149	0.0618153	1	0.0,1.0,1.0,0.988,0.892,0.956,0.946,1.0	1.0,1.0,1.0,1.0,1.0	-0.152	SE
7036	Choren_v00_mik.OX359197.1G26	NA	chrOX359197.1	-	106121	106182	105966	106027	106327	106484	7036	1,116,214,167,69,29,170,148	0,7,0,10,1,0,8,4	1,15,9,153,23	0,0,2,4,0	210	149	0.0623604	1	1.0,0.922,1.0,0.922,0.98,1.0,0.938,0.963	1.0,1.0,0.761,0.964,1.0	0.021	SE
3289	Choren_v00_mik.OX359201.1G785	NA	chrOX359201.1	+	5850131	5850162	5849113	5849311	5850693	5850836	3289	1,23,17,8,11,10,29,1	0,0,0,0,0,0,0,0	5,1,4,8,5	0,0,0,0,8	180	149	0.0647169	1	1.0,1.0,1.0,1.0,1.0,1.0,1.0,1.0	1.0,1.0,1.0,1.0,0.341	0.132	SE
5534	Choren_v00_mik.OX359196.1G459	NA	chrOX359196.1	-	4040259	4040351	4039724	4039751	4041171	4041278	5534	2,128,425,86,96,45,148,120	0,5,10,8,0,5,0,5	105,40,193,206,274	1,0,0,3,11	241	149	0.0663417	1	1.0,0.941,0.963,0.869,1.0,0.848,1.0,0.937	0.985,1.0,1.0,0.977,0.939	-0.035	SE
7433	Choren_v00_mik.OX359189.1G128	NA	chrOX359189.1	+	519627	519786	518710	518816	520062	520189	7433	3,45,251,75,63,118,227,55	0,0,0,1,4,3,12,1	127,29,565,299,298	7,0,41,0,0	298	149	0.0678613	1	1.0,1.0,1.0,0.974,0.887,0.952,0.904,0.965	0.901,1.0,0.873,1.0,1.0	0.005	SE
2548	Choren_v00_mik.OX359191.1G1145	NA	chrOX359191.1	+	8785470	8785507	8782660	8782763	8786253	8786419	2548	9.55316e+22	0,3,23,4,5,2,9,8	299153254470147	2,0,13,0,10	186	149	0.069591	1	1.0,0.993,0.982,0.988,0.989,0.995,0.989,0.977	0.992,1.0,0.94,1.0,0.922	0.018	SE
24	Choren_v00_mik.OX359202.1G899	NA	chrOX359202.1	+	6296365	6296434	6296164	6296275	6296502	6296580	24	2.18494e+23	0,13,58,5,0,0,6,3	112,58,92,331,23	2,0,0,2,0	218	149	0.0697268	1	1.0,0.99,0.977,0.961,1.0,1.0,0.956,0.988	0.975,1.0,1.0,0.991,1.0	-0.009	SE
829	Choren_v00_mik.OX359200.1G163	NA	chrOX359200.1	-	665658	665708	665495	665540	665820	665897	829	8.49813e+22	0,0,3,1,0,0,0,0	81,88,551,366,573	0,0,11,4,10	199	149	0.0708861	1	1.0,1.0,0.997,0.996,1.0,1.0,1.0,1.0	1.0,1.0,0.974,0.986,0.977	0.012	SE
5351	Choren_v00_mik.OX359200.1G591	NA	chrOX359200.1	-	4340283	4340429	4339230	4339829	4340984	4341131	5351	4,253,444,203,171,191,286,49	0,2,5,3,7,2,3,0	178,53,220,83,140	0,1,0,3,0	295	149	0.0714358	1	1.0,0.985,0.978,0.972,0.925,0.98,0.98,1.0	1.0,0.964,1.0,0.933,1.0	-0.002	SE
5619	Choren_v00_mik.OX359189.1G718	NA	chrOX359189.1	-	4754991	4755021	4754489	4754552	4758725	4758898	5619	2,35,0,13,36,37,79,13	0,0,9,4,0,0,0,6	15,11,13,0,6	0,1,1,1,0	179	149	0.0752348	1	1.0,1.0,0.0,0.73,1.0,1.0,1.0,0.643	1.0,0.902,0.915,0.0,1.0	0.033	SE
7619	Choren_v00_mik.OX359197.1G117	NA	chrOX359197.1	+	572690	572763	570981	571228	573468	573926	7619	5,91,283,83,83,57,110,103	0,5,7,0,0,0,4,9	66,18,28,60,15	0,0,0,6,0	222	149	0.0757546	1	1.0,0.924,0.964,1.0,1.0,1.0,0.949,0.885	1.0,1.0,1.0,0.87,1.0	-0.009	SE
52	Choren_v00_mik.OX359202.1G821	NA	chrOX359202.1	-	5811337	5811388	5811162	5811207	5811765	5811813	52	2,110,265,99,81,126,137,51	0,0,0,0,0,0,0,18	94,32,139,117,174	0,0,0,0,0	200	149	0.0763744	1	1.0,1.0,1.0,1.0,1.0,1.0,1.0,0.679	1.0,1.0,1.0,1.0,1.0	-0.04	SE
6908	Choren_v00_mik.OX359196.1G247	NA	chrOX359196.1	-	1480662	1480783	1480143	1480150	1481011	1481090	6908	4.38163e+21	0,1,15,3,8,3,1,1	91,44,220,149,108	5,0,2,0,0	270	149	0.0780966	1	1.0,0.995,0.959,0.968,0.949,0.98,0.988,0.992	0.909,1.0,0.984,1.0,1.0	0	SE
1197	Choren_v00_mik.OX359199.1G417	NA	chrOX359199.1	+	2665891	2665985	2665481	2665591	2666271	2666468	1197	9.57419e+22	0,1,3,7,2,2,3,5	402166496575298	12,1,4,2,5	243	149	0.0797236	1	1.0,0.997,0.997,0.979,0.994,0.994,0.995,0.977	0.954,0.99,0.987,0.994,0.973	0.012	SE
6297	Choren_v00_mik.OX359189.1G421	NA	chrOX359189.1	-	2379548	2379631	2378901	2379025	2379820	2379836	6297	2,19,157,11,22,14,12,5	0,8,0,0,0,0,4,0	9,9,2,1,5	0,0,0,0,0	232	149	0.0798377	1	1.0,0.604,1.0,1.0,1.0,1.0,0.658,1.0	1.0,1.0,1.0,1.0,1.0	-0.092	SE
2364	Choren_v00_mik.OX359199.1G646	NA	chrOX359199.1	-	4886423	4886477	4885793	4886317	4886601	4886749	2364	5,25,12,31,33,11,13,7	0,0,0,0,0,0,0,0	249,7,57,9,29	4,0,7,0,0	203	149	0.080763	1	1.0,1.0,1.0,1.0,1.0,1.0,1.0,1.0	0.979,1.0,0.857,1.0,1.0	0.033	SE
1106	Choren_v00_mik.OX359199.1G632	NA	chrOX359199.1	+	4821367	4821496	4821162	4821243	4821729	4821926	1106	2,84,519,133,69,129,151,67	0,0,26,4,0,1,3,3	34,50,212,204,269	0,0,0,0,15	278	149	0.0810993	1	1.0,1.0,0.915,0.947,1.0,0.986,0.964,0.923	1.0,1.0,1.0,1.0,0.906	-0.014	SE
6817	Choren_v00_mik.OX359193.1G1194	NA	chrOX359193.1	-	7446634	7446673	7445132	7446215	7446790	7446889	6817	4,86,578,48,161,136,84,101	0,56,199,21,43,59,51,62	96,20,155,68,137	45,39,63,45,107	188	149	0.082019	1	1.0,0.549,0.697,0.644,0.748,0.646,0.566,0.564	0.628,0.289,0.661,0.545,0.504	0.151	SE
601	Choren_v00_mik.OX359200.1G1069	NA	chrOX359200.1	-	7314570	7314620	7314252	7314339	7314784	7314841	601	2,103,358,134,66,68,55,67	0,0,1,0,0,0,0,2	94,8,98,71,61	0,0,11,0,0	199	149	0.0821011	1	1.0,1.0,0.996,1.0,1.0,1.0,1.0,0.962	1.0,1.0,0.87,1.0,1.0	0.021	SE
3063	Choren_v00_mik.OX359191.1G36	NA	chrOX359191.1	+	133417	133468	133162	133307	134481	134583	3063	0,15,93,23,4,4,29,19	4,36,838,273,65,25,226,397	1,9,4,9,2	40,62,116,39,77	200	149	0.084331	1	0.0,0.237,0.076,0.059,0.044,0.107,0.087,0.034	0.018,0.098,0.025,0.147,0.019	0.019	SE
476	Choren_v00_mik.OX359201.1G491	NA	chrOX359201.1	-	3852721	3852904	3852416	3852616	3853132	3853227	476	4,62,227,112,111,43,83,84	0,0,1,0,0,0,0,0	100,33,158,266,240	0,0,11,2,0	298	149	0.0843327	1	1.0,1.0,0.991,1.0,1.0,1.0,1.0,1.0	1.0,1.0,0.878,0.985,1.0	0.026	SE
4823	Choren_v00_mik.OX359200.1G607	NA	chrOX359200.1	+	4426103	4426132	4425799	4425886	4427840	4428023	4823	9,160,27,98,381,288,557,194	0,6,6,0,0,0,18,0	336,94,169,59,73	0,0,0,0,0	178	149	0.085722	1	1.0,0.957,0.79,1.0,1.0,1.0,0.963,1.0	1.0,1.0,1.0,1.0,1.0	-0.036	SE
8163	Choren_v00_mik.OX359196.1G440	NA	chrOX359196.1	-	3892319	3892360	3891821	3891994	3892450	3892487	8163	2.01102e+26	0,31,81,31,37,14,41,43	7373387231444280	28,11,9,36,1	190	149	0.0862879	1	1.0,0.965,0.972,0.954,0.965,0.974,0.941,0.957	0.954,0.96,0.984,0.969,0.995	-0.006	SE
2103	Choren_v00_mik.OX359198.1G1007	NA	chrOX359198.1	-	7373336	7373387	7372662	7372828	7373929	7374007	2103	3.20611e+22	0,5,63,6,16,0,2,2	295,51,306,232,263	8,0,17,9,21	200	149	0.087484	1	1.0,0.968,0.929,0.97,0.921,1.0,0.991,0.987	0.965,1.0,0.931,0.951,0.903	0.021	SE
4915	Choren_v00_mik.OX359189.1G542	NA	chrOX359189.1	-	3018466	3018628	3017154	3017324	3018886	3019052	4915	1,42,166,5,25,92,29,5	0,2,0,8,0,1,0,0	21,9,34,39,4	0,0,1,1,0	298	149	0.0904928	1	1.0,0.913,1.0,0.238,1.0,0.979,1.0,1.0	1.0,1.0,0.944,0.951,1.0	-0.088	SE
1773	Choren_v00_mik.OX359197.1G794	NA	chrOX359197.1	+	5964245	5964523	5963454	5963657	5964727	5964923	1773	1.23392e+23	0,1,2,0,1,8,1,3	224105401709216	0,2,4,4,9	298	149	0.0909565	1	1.0,0.994,0.998,1.0,0.996,0.957,0.992,0.983	1.0,0.963,0.98,0.989,0.923	0.019	SE
815	Choren_v00_mik.OX359200.1G178	NA	chrOX359200.1	+	787387	787521	786949	787027	787597	787693	815	6,297,82,258,288,281,171,191	0,5,0,3,8,2,0,7	149,75,199,69,23	6,0,8,0,2	283	149	0.0935223	1	1.0,0.969,1.0,0.978,0.95,0.987,1.0,0.935	0.929,1.0,0.929,1.0,0.858	0.034	SE
3336	Choren_v00_mik.OX359197.1G937	NA	chrOX359197.1	+	6678677	6678779	6677318	6677421	6680163	6680238	3336	2.11923e+26	0,16,330,37,8,6,11,4	522,169,104,67,267	2,3,12,0,2	251	149	0.0963628	1	1.0,0.978,0.856,0.951,0.985,0.981,0.996,0.994	0.994,0.971,0.837,1.0,0.988	0.01	SE
3059	Choren_v00_mik.OX359191.1G48	NA	chrOX359191.1	-	188936	189023	188331	188513	189121	189261	3059	3.15254e+21	0,3,56,2,6,5,11,10	147,86,179,217,68	5,6,10,6,0	236	149	0.0984846	1	1.0,0.97,0.859,0.974,0.957,0.961,0.925,0.923	0.949,0.9,0.919,0.958,1.0	0.001	SE
4524	Choren_v00_mik.OX359191.1G1127	NA	chrOX359191.1	-	8675835	8676033	8674641	8674746	8676749	8676786	4524	2,74,314,20,108,132,56,34	0,2,10,0,2,5,0,2	44,19,63,116,71	1,0,2,9,4	298	149	0.0985229	1	1.0,0.949,0.94,1.0,0.964,0.93,1.0,0.895	0.957,1.0,0.94,0.866,0.899	0.027	SE
2604	Choren_v00_mik.OX359195.1G955	NA	chrOX359195.1	-	6777041	6777251	6776422	6776567	6778559	6778620	2604	2.21151e+21	0,2,7,0,4,5,4,0	208,85,236,387,193	0,2,2,2,1	298	149	0.098952	1	1.0,0.981,0.973,1.0,0.959,0.957,0.973,1.0	1.0,0.955,0.983,0.99,0.99	-0.003	SE
7159	Choren_v00_mik.OX359198.1G496	NA	chrOX359198.1	+	4076825	4076880	4076074	4076119	4086651	4086720	7159	7.33292e+21	0,10,15,8,9,4,7,5	397110380468272	9,1,20,5,9	204	149	0.0998192	1	1.0,0.96,0.978,0.971,0.969,0.978,0.98,0.978	0.97,0.988,0.933,0.986,0.957	0.01	SE
8054	Choren_v00_mik.OX359192.1G1224	NA	chrOX359192.1	+	7995173	7995205	7994930	7995055	7995332	7995398	8054	2,88,261,87,65,84,172,93	0,13,33,3,9,4,7,6	66,39,39,75,19	1,3,3,5,3	181	149	0.100139	1	1.0,0.848,0.867,0.96,0.856,0.945,0.953,0.927	0.982,0.915,0.915,0.925,0.839	0.004	SE
5153	Choren_v00_mik.OX359192.1G304	NA	chrOX359192.1	+	1868935	1869988	1867824	1868063	1870480	1870632	5153	0,52,94,35,9,62,6,16	2,25,44,29,2,48,6,13	14,11,45,9,2	16,21,40,10,1	298	149	0.101402	1	0.0,0.51,0.516,0.376,0.692,0.392,0.333,0.381	0.304,0.208,0.36,0.31,0.5	0.064	SE
1575	Choren_v00_mik.OX359198.1G370	NA	chrOX359198.1	+	2176463	2176524	2175901	2175975	2177857	2177930	1575	1,106,159,58,55,65,193,72	0,1,3,3,1,2,2,0	63,40,54,141,10	4,1,0,2,4	210	149	0.105784	1	1.0,0.987,0.974,0.932,0.975,0.958,0.986,1.0	0.918,0.966,1.0,0.98,0.639	0.076	SE
4538	Choren_v00_mik.OX359189.1G123	NA	chrOX359189.1	-	493273	493417	492888	493005	493483	493534	4538	2,184,367,98,136,107,99,95	0,8,4,4,0,0,1,1	100,49,490,475,307	0,0,0,2,0	293	149	0.106023	1	1.0,0.921,0.979,0.926,1.0,1.0,0.981,0.98	1.0,1.0,1.0,0.992,1.0	-0.025	SE
2608	Choren_v00_mik.OX359195.1G955	NA	chrOX359195.1	-	6777886	6777980	6777041	6777251	6778559	6778620	2608	4.30961e+21	0,22,14,11,10,13,18,10	244130223455218	16,6,17,15,16	243	149	0.107105	1	1.0,0.896,0.964,0.929,0.948,0.937,0.907,0.946	0.903,0.93,0.889,0.949,0.893	0.028	SE
14	Choren_v00_mik.OX359202.1G973	NA	chrOX359202.1	+	6564379	6564478	6564042	6564140	6564572	6564620	14	1,10,73,23,22,23,43,7	0,0,6,0,0,0,6,1	22,4,59,61,130	0,0,12,4,11	248	149	0.107452	1	1.0,1.0,0.88,1.0,1.0,1.0,0.812,0.808	1.0,1.0,0.747,0.902,0.877	0.032	SE
8317	Choren_v00_mik.OX359190.1G718	NA	chrOX359190.1	+	4667084	4667099	4666740	4666822	4667859	4667964	8317	3.14136e+21	0,0,1,0,0,0,0,0	174,52,321,293,267	0,0,12,2,7	164	149	0.108606	1	1.0,1.0,0.997,1.0,1.0,1.0,1.0,1.0	1.0,1.0,0.96,0.993,0.972	0.015	SE
108	Choren_v00_mik.OX359202.1G667	NA	chrOX359202.1	+	4916402	4916529	4915258	4915420	4916604	4916641	108	4.27453e+21	0,5,7,3,4,3,19,1	202,107,126,182,74	0,1,5,2,1	276	149	0.10923	1	1.0,0.967,0.976,0.983,0.973,0.981,0.93,0.993	1.0,0.983,0.932,0.98,0.976	0.001	SE
6545	Choren_v00_mik.OX359197.1G418	NA	chrOX359197.1	+	2593712	2593874	2591668	2591758	2594235	2594333	6545	1,101,430,67,120,52,88,100	0,0,0,0,0,0,0,0	105,24,180,170,117	0,2,0,1,8	298	149	0.113583	1	1.0,1.0,1.0,1.0,1.0,1.0,1.0,1.0	1.0,0.857,1.0,0.988,0.88	0.055	SE
5318	Choren_v00_mik.OX359196.1G992	NA	chrOX359196.1	-	6632926	6633032	6632202	6632867	6633180	6633238	5318	2,47,97,48,68,14,53,73	0,0,0,0,2,0,0,0	43,17,314,173,293	1,0,4,0,9	255	149	0.116568	1	1.0,1.0,1.0,1.0,0.952,1.0,1.0,1.0	0.962,1.0,0.979,1.0,0.95	0.016	SE
2099	Choren_v00_mik.OX359192.1G973	NA	chrOX359192.1	+	6746432	6746602	6745957	6746179	6746940	6747268	2099	1,99,428,34,71,82,74,28	0,0,4,0,0,2,4,0	83,40,64,196,79	0,0,2,8,0	298	149	0.120476	1	1.0,1.0,0.982,1.0,1.0,0.953,0.902,1.0	1.0,1.0,0.941,0.925,1.0	0.006	SE
7888	Choren_v00_mik.OX359195.1G1031	NA	chrOX359195.1	+	7220229	7220307	7220072	7220164	7220657	7220790	7888	4,327,593,93,295,185,117,213	0,0,0,0,0,0,0,0	205,77,837,678,1835	0,0,35,0,0	227	149	0.125429	1	1.0,1.0,1.0,1.0,1.0,1.0,1.0,1.0	1.0,1.0,0.94,1.0,1.0	0.012	SE
7056	Choren_v00_mik.OX359199.1G216	NA	chrOX359199.1	+	1124440	1124513	1122202	1122425	1129324	1129533	7056	1,19,77,14,29,4,8,21	0,3,8,0,0,0,2,0	15,10,5,16,8	0,0,0,0,0	222	149	0.128055	1	1.0,0.81,0.866,1.0,1.0,1.0,0.729,1.0	1.0,1.0,1.0,1.0,1.0	-0.074	SE
2611	Choren_v00_mik.OX359195.1G955	NA	chrOX359195.1	-	6778559	6778620	6777041	6777251	6778917	6779143	2611	1,105,161,104,98,90,121,96	0,17,11,20,15,10,11,5	98,49,109,142,76	17,6,22,11,16	210	149	0.128394	1	1.0,0.814,0.912,0.787,0.823,0.865,0.886,0.932	0.804,0.853,0.779,0.902,0.771	0.056	SE
3080	Choren_v00_mik.OX359191.1G14	NA	chrOX359191.1	-	34327	34397	34204	34268	34453	34667	3080	0,50,466,51,90,59,89,70	2,7,22,5,10,2,3,4	80,13,95,89,80	3,0,6,3,4	219	149	0.129476	1	0.0,0.829,0.935,0.874,0.86,0.953,0.953,0.923	0.948,1.0,0.915,0.953,0.932	-0.159	SE
4098	Choren_v00_mik.OX359195.1G897	NA	chrOX359195.1	-	6521436	6521469	6519623	6519788	6524276	6524377	4098	0,103,144,51,33,60,48,94	2,137,307,90,63,56,62,193	29,29,28,31,16	125,14,78,111,80	182	149	0.130942	1	0.0,0.381,0.277,0.317,0.3,0.467,0.388,0.285	0.16,0.629,0.227,0.186,0.141	0.033	SE
4281	Choren_v00_mik.OX359192.1G41	NA	chrOX359192.1	+	204657	204723	203692	203865	204890	205089	4281	3.12947e+21	0,9,4,15,8,32,60,4	240,47,111,140,65	6,3,29,3,19	215	149	0.132961	1	1.0,0.909,0.988,0.921,0.955,0.787,0.832,0.971	0.965,0.916,0.726,0.97,0.703	0.064	SE
1076	Choren_v00_mik.OX359199.1G692	NA	chrOX359199.1	-	5138447	5138544	5137852	5137926	5140345	5140420	1076	2.27591e+23	0,2,17,12,11,2,18,1	3.31139e+16	4,8,55,14,39	246	149	0.134222	1	1.0,0.996,0.978,0.946,0.962,0.993,0.949,0.995	0.98,0.913,0.969,0.968,0.977	0.016	SE
4998	Choren_v00_mik.OX359192.1G1032	NA	chrOX359192.1	-	7058653	7058777	7057320	7057400	7060418	7060515	4998	2,31,86,23,10,22,24,22	0,0,2,0,0,0,4,5	12,5,47,29,23	0,0,1,1,0	273	149	0.134888	1	1.0,1.0,0.959,1.0,1.0,1.0,0.766,0.706	1.0,1.0,0.962,0.941,1.0	-0.052	SE
3296	Choren_v00_mik.OX359198.1G1044	NA	chrOX359198.1	+	7635542	7635717	7634888	7635047	7635797	7635964	3296	3,88,358,79,90,224,322,195	0,0,0,0,0,0,0,0	294,80,172,183,170	0,0,12,0,1	298	149	0.135561	1	1.0,1.0,1.0,1.0,1.0,1.0,1.0,1.0	1.0,1.0,0.878,1.0,0.988	0.027	SE
1399	Choren_v00_mik.OX359198.1G882	NA	chrOX359198.1	-	6711446	6711643	6710044	6710139	6711945	6712000	1399	6.64411e+22	0,2,0,0,0,2,0,0	322246893668754	1,3,6,2,14	298	149	0.138738	1	1.0,0.994,1.0,1.0,1.0,0.992,1.0,1.0	0.994,0.976,0.987,0.994,0.964	0.015	SE
3754	Choren_v00_mik.OX359193.1G480	NA	chrOX359193.1	+	2914498	2914630	2907987	2908104	2923707	2923787	3754	6,83,234,60,87,92,187,100	1,0,11,3,2,8,11,13	62,37,321,197,600	4,0,11,5,26	281	149	0.144087	1	0.761,1.0,0.919,0.914,0.958,0.859,0.9,0.803	0.892,1.0,0.939,0.954,0.924	-0.053	SE
1546	Choren_v00_mik.OX359198.1G417	NA	chrOX359198.1	-	2687796	2688204	2684304	2684854	2699196	2699796	1546	1.41619e+22	0,4,10,0,12,1,0,6	120,57,84,36,56	0,2,0,0,0	298	149	0.144974	1	1.0,0.981,0.99,1.0,0.939,0.991,1.0,0.924	1.0,0.934,1.0,1.0,1.0	-0.009	SE
1755	Choren_v00_mik.OX359197.1G857	NA	chrOX359197.1	-	6277111	6278236	6276624	6276715	6278444	6278666	1755	0,21,72,12,22,15,19,13	5,79,230,42,70,43,38,37	7,7,34,36,16	25,10,126,159,102	298	149	0.14505	1	0.0,0.117,0.135,0.125,0.136,0.149,0.2,0.149	0.123,0.259,0.119,0.102,0.073	-0.009	SE
761	Choren_v00_mik.OX359200.1G368	NA	chrOX359200.1	+	1736721	1736767	1736306	1736489	1738236	1738313	761	1,135,365,90,118,115,58,63	0,9,10,0,0,4,0,0	91,45,84,198,81	0,0,2,0,6	195	149	0.146141	1	1.0,0.92,0.965,1.0,1.0,0.956,1.0,1.0	1.0,1.0,0.97,1.0,0.912	0.004	SE
6665	Choren_v00_mik.OX359191.1G1241	NA	chrOX359191.1	+	9287044	9287152	9286904	9286952	9287319	9287490	6665	1,31,144,11,11,27,9,13	0,0,2,0,0,0,9,0	16,13,113,63,113	0,0,0,1,2	257	149	0.146924	1	1.0,1.0,0.977,1.0,1.0,1.0,0.367,1.0	1.0,1.0,1.0,0.973,0.97	-0.071	SE
6734	Choren_v00_mik.OX359193.1G1071	NA	chrOX359193.1	+	6860660	6860719	6860449	6860560	6860876	6861041	6734	5,163,702,88,159,75,81,79	0,3,3,7,8,0,3,0	70,28,75,83,23	0,0,2,3,0	208	149	0.147795	1	1.0,0.975,0.994,0.9,0.934,1.0,0.951,1.0	1.0,1.0,0.964,0.952,1.0	-0.014	SE
6021	Choren_v00_mik.OX359192.1G1368	NA	chrOX359192.1	+	8759504	8759683	8759216	8759418	8759797	8760461	6021	1,104,313,60,75,95,207,62	0,4,2,4,0,3,1,0	87,36,85,170,52	1,0,1,10,0	298	149	0.150083	1	1.0,0.929,0.987,0.882,1.0,0.941,0.99,1.0	0.978,1.0,0.977,0.895,1.0	-0.004	SE
1893	Choren_v00_mik.OX359197.1G547	NA	chrOX359197.1	-	4304118	4304338	4303959	4304034	4304492	4304568	1893	1,166,6,1076,21,81,2015,35	0,0,8,0,0,0,0,0	216,279,30,311,20	0,0,2,0,0	298	149	0.1502	1	1.0,1.0,0.273,1.0,1.0,1.0,1.0,1.0	1.0,1.0,0.882,1.0,1.0	-0.067	SE
1486	Choren_v00_mik.OX359198.1G670	NA	chrOX359198.1	-	5145465	5145593	5144947	5145034	5145897	5145940	1486	1.67531e+24	0,25,0,0,2,2,0,29	568166352587296	0,1,0,0,10	277	149	0.150387	1	1.0,0.942,1.0,1.0,0.996,0.995,1.0,0.943	1.0,0.989,1.0,1.0,0.941	-0.001	SE
7475	Choren_v00_mik.OX359194.1G959	NA	chrOX359194.1	+	7657351	7657494	7657127	7657266	7657646	7657730	7475	1.57593e+21	0,30,5,12,8,4,12,18	261,29,152,647,237	11,8,0,6,2	292	149	0.153527	1	1.0,0.907,0.99,0.927,0.948,0.943,0.933,0.83	0.924,0.649,1.0,0.982,0.984	0.027	SE
523	Choren_v00_mik.OX359201.1G260	NA	chrOX359201.1	+	1357082	1357270	1355699	1356127	1358428	1358802	523	1,27,1,14,26,22,17,44	0,0,6,0,0,0,0,0	9,1,9,5,1	0,0,0,0,0	298	149	0.161355	1	1.0,1.0,0.077,1.0,1.0,1.0,1.0,1.0	1.0,1.0,1.0,1.0,1.0	-0.115	SE
7201	Choren_v00_mik.OX359192.1G975	NA	chrOX359192.1	+	6782010	6782100	6776676	6776720	6789110	6789285	7201	1,43,244,27,64,25,45,13	0,4,6,0,2,1,0,0	29,9,7,87,5	1,0,0,0,0	239	149	0.161969	1	1.0,0.87,0.962,1.0,0.952,0.94,1.0,1.0	0.948,1.0,1.0,1.0,1.0	-0.024	SE
5891	Choren_v00_mik.OX359192.1G1155	NA	chrOX359192.1	+	7743901	7743945	7743424	7743629	7744007	7744076	5891	1,24,167,33,22,45,54,43	0,0,0,4,2,4,7,6	28,6,34,33,12	7,0,0,0,0	193	149	0.163587	1	1.0,1.0,1.0,0.864,0.895,0.897,0.856,0.847	0.755,1.0,1.0,1.0,1.0	-0.031	SE
2395	Choren_v00_mik.OX359192.1G184	NA	chrOX359192.1	-	1107896	1107993	1107616	1107719	1108244	1108476	2395	1,37,13,7,30,8,20,14	0,2,0,0,2,0,1,5	27,12,6,27,10	0,0,0,0,0	246	149	0.163857	1	1.0,0.918,1.0,1.0,0.901,1.0,0.924,0.629	1.0,1.0,1.0,1.0,1.0	-0.079	SE
5520	Choren_v00_mik.OX359199.1G1079	NA	chrOX359199.1	+	7197114	7197162	7196864	7196893	7197325	7197438	5520	6.50772e+21	0,8,1,3,1,5,1,6	472,221,36,324,63	4,4,5,5,0	197	149	0.165816	1	1.0,0.98,0.998,0.992,0.997,0.98,0.997,0.987	0.989,0.977,0.845,0.98,1.0	0.033	SE
7839	Choren_v00_mik.OX359196.1G1011	NA	chrOX359196.1	-	6723334	6723404	6723116	6723268	6723494	6723674	7839	0,1,129,70,16,28,0,34	3,126,599,109,175,76,200,147	81,0,34,37,1	149,16,162,132,70	219	149	0.166075	1	0.0,0.005,0.128,0.304,0.059,0.2,0.0,0.136	0.27,0.0,0.125,0.16,0.01	-0.009	SE
2628	Choren_v00_mik.OX359194.1G801	NA	chrOX359194.1	+	6819708	6819830	6818953	6819092	6819909	6820095	2628	1.09651e+23	0,10,2,5,2,7,4,0	226,169,181,126,99	0,0,3,3,8	271	149	0.167034	1	1.0,0.982,0.997,0.929,0.978,0.947,0.986,1.0	1.0,1.0,0.971,0.958,0.872	0.017	SE
6964	Choren_v00_mik.OX359193.1G1459	NA	chrOX359193.1	-	8665788	8665827	8665461	8665566	8665888	8665980	6964	6,155,518,177,115,88,377,200	0,0,29,2,1,0,0,0	186,87,189,145,139	2,2,5,0,1	188	149	0.167276	1	1.0,1.0,0.934,0.986,0.989,1.0,1.0,1.0	0.987,0.972,0.968,1.0,0.991	0.005	SE
6862	Choren_v00_mik.OX359191.1G123	NA	chrOX359191.1	-	707900	708051	706714	707384	708171	708278	6862	21,706,2195,94,850,949,363,270	0,0,59,0,2,0,0,0	341236172537227	0,0,0,13,0	298	149	0.169758	1	1.0,1.0,0.949,1.0,0.995,1.0,1.0,1.0	1.0,1.0,1.0,0.954,1.0	0.002	SE
694	Choren_v00_mik.OX359200.1G608	NA	chrOX359200.1	+	4437499	4437596	4436601	4436657	4439297	4439429	694	2.61814e+22	0,3,23,0,1,4,4,0	149176361628323	4,0,3,16,1	246	149	0.170846	1	1.0,0.992,0.974,1.0,0.997,0.966,0.974,1.0	0.958,1.0,0.986,0.96,0.995	0.008	SE
6360	Choren_v00_mik.OX359193.1G339	NA	chrOX359193.1	+	1889103	1889153	1888689	1888844	1889344	1889478	6360	2,97,483,260,144,126,185,87	0,6,0,0,0,0,0,0	87,68,76,354,156	0,0,13,0,0	199	149	0.171153	1	1.0,0.924,1.0,1.0,1.0,1.0,1.0,1.0	1.0,1.0,0.814,1.0,1.0	0.028	SE
6427	Choren_v00_mik.OX359196.1G90	NA	chrOX359196.1	-	437242	437370	436764	437001	437577	437644	6427	0,0,1,12,0,0,2,8	8,25,294,131,112,28,78,106	0,6,4,7,4	103,21,177,83,109	277	149	0.171691	1	0.0,0.0,0.002,0.047,0.0,0.0,0.014,0.039	0.0,0.133,0.012,0.043,0.019	-0.029	SE
3976	Choren_v00_mik.OX359196.1G117	NA	chrOX359196.1	-	594103	594125	593827	593914	594450	594502	3976	4,93,211,93,84,74,70,58	0,11,110,18,38,13,14,4	82,36,160,166,122	16,11,49,48,38	171	149	0.175064	1	1.0,0.88,0.626,0.818,0.658,0.832,0.813,0.927	0.817,0.74,0.74,0.751,0.737	0.062	SE
6971	Choren_v00_mik.OX359200.1G49	NA	chrOX359200.1	-	148938	148999	148741	148882	149059	149274	6971	2,61,213,49,26,63,38,53	0,1,9,2,0,1,2,0	42,31,18,104,12	4,0,1,0,0	210	149	0.176559	1	1.0,0.977,0.944,0.946,1.0,0.978,0.931,1.0	0.882,1.0,0.927,1.0,1.0	0.01	SE
2291	Choren_v00_mik.OX359196.1G771	NA	chrOX359196.1	-	5611935	5612001	5610363	5610555	5612158	5612285	2291	2,163,320,88,169,86,133,112	0,0,32,2,7,1,4,0	1.18113e+17	0,0,58,49,49	215	149	0.180879	1	1.0,1.0,0.874,0.968,0.944,0.983,0.958,1.0	1.0,1.0,0.966,0.943,0.969	-0.01	SE
2471	Choren_v00_mik.OX359197.1G935	NA	chrOX359197.1	+	6665092	6666181	6658203	6658571	6666794	6667953	2471	1.04282e+24	0,269,708,134,183,219,321,205	416158368189161	160,49,169,161,98	298	149	0.185251	1	1.0,0.443,0.598,0.631,0.734,0.52,0.42,0.56	0.565,0.617,0.521,0.37,0.451	0.108	SE
5535	Choren_v00_mik.OX359196.1G459	NA	chrOX359196.1	-	4040259	4040351	4039724	4039751	4041522	4041666	5535	2,62,236,42,51,17,78,85	0,0,2,0,0,0,0,0	35,16,98,105,142	0,0,0,0,10	241	149	0.187782	1	1.0,1.0,0.986,1.0,1.0,1.0,1.0,1.0	1.0,1.0,1.0,1.0,0.898	0.019	SE
2610	Choren_v00_mik.OX359195.1G955	NA	chrOX359195.1	-	6778559	6778620	6776422	6776567	6778917	6779143	2610	1,85,154,93,92,82,107,86	0,11,16,10,9,5,14,0	82,45,94,130,61	3,1,12,20,20	210	149	0.189969	1	1.0,0.846,0.872,0.868,0.879,0.921,0.844,1.0	0.951,0.97,0.848,0.822,0.684	0.049	SE
164	Choren_v00_mik.OX359202.1G480	NA	chrOX359202.1	-	2645249	2645347	2644652	2644841	2645456	2645530	164	2.1746e+21	0,0,0,1,0,1,0,2	116,42,227,231,169	0,0,0,5,8	247	149	0.190895	1	1.0,1.0,1.0,0.987,1.0,0.987,1.0,0.973	1.0,1.0,1.0,0.965,0.927	0.015	SE
28	Choren_v00_mik.OX359202.1G894	NA	chrOX359202.1	-	6253116	6253260	6252860	6252920	6253358	6253407	28	2,65,189,61,34,66,112,55	0,0,14,2,4,2,0,3	66,26,54,136,65	1,0,7,6,7	293	149	0.191644	1	1.0,1.0,0.873,0.939,0.812,0.944,1.0,0.903	0.971,1.0,0.797,0.92,0.825	0.031	SE
4443	Choren_v00_mik.OX359189.1G70	NA	chrOX359189.1	-	239263	239304	238717	238914	239558	239652	4443	2,105,80,52,73,91,100,49	0,4,0,8,6,4,2,2	91112234238102	9,2,16,10,6	190	149	0.192084	1	1.0,0.954,1.0,0.836,0.905,0.947,0.975,0.951	0.888,0.978,0.92,0.949,0.93	0.013	SE
7733	Choren_v00_mik.OX359195.1G556	NA	chrOX359195.1	+	4474637	4474667	4464241	4464361	4484744	4484822	7733	1.33473e+21	0,15,133,36,2,3,0,14	143,59,228,173,78	6,4,14,12,0	179	149	0.195982	1	1.0,0.949,0.821,0.861,0.993,0.969,1.0,0.945	0.952,0.925,0.931,0.923,1.0	-0.004	SE
2990	Choren_v00_mik.OX359191.1G1221	NA	chrOX359191.1	+	9202283	9202417	9201888	9201970	9202553	9202627	2990	4.28182e+21	0,0,3,3,6,4,2,3	296,49,159,362,66	7,1,0,0,6	283	149	0.19667	1	1.0,1.0,0.993,0.981,0.958,0.97,0.991,0.969	0.957,0.963,1.0,1.0,0.853	0.028	SE
3951	Choren_v00_mik.OX359199.1G111	NA	chrOX359199.1	+	544785	545136	544499	544613	546008	546130	3951	0,75,194,36,27,76,56,58	2,6,37,3,1,2,0,0	36,18,61,25,29	1,3,2,7,3	298	149	0.197177	1	0.0,0.862,0.724,0.857,0.931,0.95,1.0,1.0	0.947,0.75,0.938,0.641,0.829	-0.03	SE
3248	Choren_v00_mik.OX359195.1G1246	NA	chrOX359195.1	+	8300549	8300632	8300321	8300400	8300804	8300841	3248	1,33,111,30,29,35,52,15	0,2,63,2,10,12,5,0	30,17,41,88,13	1,2,4,8,6	232	149	0.201304	1	1.0,0.914,0.531,0.906,0.651,0.652,0.87,1.0	0.951,0.845,0.868,0.876,0.582	-0.009	SE
8116	Choren_v00_mik.OX359198.1G1027	NA	chrOX359198.1	+	7510463	7510538	7510131	7510264	7511209	7511348	8116	0,14,29,23,7,24,34,14	1,34,76,44,15,54,52,24	16,9,12,2,0	84,8,18,8,10	224	149	0.206982	1	0.0,0.215,0.202,0.258,0.237,0.228,0.303,0.28	0.112,0.428,0.307,0.143,0.0	0.017	SE
7407	Choren_v00_mik.OX359194.1G842	NA	chrOX359194.1	-	7009398	7009550	7009232	7009339	7009918	7010630	7407	2,208,624,172,131,31,161,91	0,2,8,6,4,0,2,0	211,20,211,108,112	5,0,4,2,5	298	149	0.207298	1	1.0,0.981,0.975,0.935,0.942,1.0,0.976,1.0	0.955,1.0,0.963,0.964,0.918	0.016	SE
1136	Choren_v00_mik.OX359199.1G583	NA	chrOX359199.1	+	4481568	4481659	4480972	4481059	4481740	4481916	1136	2,133,447,48,184,148,131,157	0,3,9,0,4,0,4,0	159,29,140,97,90	0,0,5,1,0	240	149	0.210547	1	1.0,0.965,0.969,1.0,0.966,1.0,0.953,1.0	1.0,1.0,0.946,0.984,1.0	-0.004	SE
117	Choren_v00_mik.OX359202.1G629	NA	chrOX359202.1	-	4584414	4584524	4583818	4584014	4585140	4585275	117	8,12,686,231,199,4,478,91	0,0,0,1,0,0,8,0	230,68,203,114,91	7,0,5,0,0	259	149	0.212565	1	1.0,1.0,1.0,0.993,1.0,1.0,0.972,1.0	0.95,1.0,0.959,1.0,1.0	0.014	SE
7676	Choren_v00_mik.OX359195.1G286	NA	chrOX359195.1	-	1900766	1900823	1900272	1900449	1901158	1901241	7676	6.32713e+22	0,0,1,2,0,5,0,0	216,56,131,187,99	0,0,13,0,0	206	149	0.213089	1	1.0,1.0,0.999,0.99,1.0,0.957,1.0,1.0	1.0,1.0,0.879,1.0,1.0	0.017	SE
4618	Choren_v00_mik.OX359189.1G369	NA	chrOX359189.1	-	1958548	1958603	1957715	1957890	1958938	1959063	4618	1,77,305,89,345,153,111,175	0,0,9,3,12,2,4,0	71,2,68,2,22	2,0,2,0,1	204	149	0.214324	1	1.0,1.0,0.961,0.956,0.955,0.982,0.953,1.0	0.963,1.0,0.961,1.0,0.941	0.003	SE
6471	Choren_v00_mik.OX359197.1G67	NA	chrOX359197.1	-	312661	312727	311818	311916	313186	313247	6471	0,112,172,41,67,71,138,12	6,116,489,100,100,56,78,39	55,23,59,65,39	104,25,99,23,45	215	149	0.215603	1	0.0,0.401,0.196,0.221,0.317,0.468,0.551,0.176	0.268,0.389,0.292,0.662,0.375	-0.106	SE
1013	Choren_v00_mik.OX359200.1G108	NA	chrOX359200.1	+	395264	395382	394937	394977	396542	396588	1013	0,195,523,79,111,125,123,108	2,4,2,3,0,2,2,0	77,67,14,154,41	1,0,0,0,1	267	149	0.221071	1	0.0,0.965,0.993,0.936,1.0,0.972,0.972,1.0	0.977,1.0,1.0,1.0,0.958	-0.132	SE
5984	Choren_v00_mik.OX359192.1G1295	NA	chrOX359192.1	-	8366244	8366386	8366082	8366175	8366488	8366553	5984	1,113,268,73,93,110,168,112	0,2,16,0,0,2,0,0	95,42,247,51,150	0,0,1,0,7	291	149	0.221375	1	1.0,0.967,0.896,1.0,1.0,0.966,1.0,1.0	1.0,1.0,0.992,1.0,0.916	-0.003	SE
5656	Choren_v00_mik.OX359200.1G52	NA	chrOX359200.1	+	191268	191301	190909	191184	192166	192325	5656	3.28552e+21	0,0,29,0,0,0,0,0	100,54,66,52,27	0,0,0,0,0	182	149	0.226598	1	1.0,1.0,0.936,1.0,1.0,1.0,1.0,1.0	1.0,1.0,1.0,1.0,1.0	-0.008	SE
1289	Choren_v00_mik.OX359199.1G136	NA	chrOX359199.1	-	658701	658827	657933	658211	659282	659443	1289	2,62,61,104,66,26,62,12	0,0,0,0,0,2,0,7	39,34,54,121,24	0,0,0,0,0	275	149	0.227954	1	1.0,1.0,1.0,1.0,1.0,0.876,1.0,0.482	1.0,1.0,1.0,1.0,1.0	-0.08	SE
5979	Choren_v00_mik.OX359200.1G658	NA	chrOX359200.1	-	4793055	4793280	4792479	4792568	4794338	4794472	5979	2.11782e+21	0,0,46,0,29,0,0,0	75,48,51,5,0	0,0,0,11,6	298	149	0.228266	1	1.0,1.0,0.899,1.0,0.762,1.0,1.0,1.0	1.0,1.0,1.0,0.185,0.0	0.321	SE
3949	Choren_v00_mik.OX359199.1G541	NA	chrOX359199.1	-	4184891	4185154	4184546	4184667	4185366	4185492	3949	1,20,51,6,12,2,19,20	2,2,3,0,3,0,0,6	3,6,13,45,8	1,0,4,7,2	298	149	0.229086	1	0.2,0.833,0.895,1.0,0.667,1.0,1.0,0.625	0.6,1.0,0.619,0.763,0.667	0.048	SE
2605	Choren_v00_mik.OX359195.1G955	NA	chrOX359195.1	-	6777041	6777251	6776422	6776567	6778917	6779143	2605	2.2065e+21	0,11,16,10,9,5,14,0	209,85,241,383,193	3,1,12,20,20	298	149	0.23172	1	1.0,0.904,0.94,0.874,0.914,0.956,0.908,1.0	0.972,0.977,0.909,0.905,0.828	0.019	SE
240	Choren_v00_mik.OX359202.1G214	NA	chrOX359202.1	+	879651	879683	879460	879584	880110	880213	240	4,96,201,241,126,64,887,292	0,2,4,6,2,0,25,4	241,108,42,238,43	10,0,1,1,0	181	149	0.232051	1	1.0,0.975,0.976,0.971,0.981,1.0,0.967,0.984	0.952,1.0,0.972,0.995,1.0	-0.002	SE
1368	Choren_v00_mik.OX359198.1G949	NA	chrOX359198.1	-	7059073	7059119	7058682	7058760	7059443	7059569	1368	0,4,13,9,7,9,7,0	2,165,641,209,215,182,183,76	14,1,0,2,4	120,48,300,243,242	195	149	0.234777	1	0.0,0.018,0.015,0.032,0.024,0.036,0.028,0.0	0.082,0.016,0.0,0.006,0.012	-0.004	SE
537	Choren_v00_mik.OX359201.1G223	NA	chrOX359201.1	+	1128494	1128594	1127477	1127694	1129133	1129334	537	1,99,607,114,2,24,291,123	0,1,13,4,0,0,25,10	36,31,211,175,393	0,0,7,2,18	249	149	0.235842	1	1.0,0.983,0.965,0.945,1.0,1.0,0.874,0.88	1.0,1.0,0.947,0.981,0.929	-0.016	SE
2953	Choren_v00_mik.OX359191.1G222	NA	chrOX359191.1	+	1376448	1376577	1375863	1375998	1377053	1377244	2953	5,153,222,227,81,208,293,174	0,1,0,0,0,0,0,0	262,59,87,34,45	0,2,0,0,7	278	149	0.236399	1	1.0,0.988,1.0,1.0,1.0,1.0,1.0,1.0	1.0,0.941,1.0,1.0,0.775	0.055	SE
5828	Choren_v00_mik.OX359192.1G1066	NA	chrOX359192.1	-	7258527	7258585	7258198	7258260	7258683	7258815	5828	2,53,753,95,97,138,38,66	0,2,4,4,9,6,3,2	91,64,115,223,102	10,2,2,7,1	207	149	0.241036	1	1.0,0.95,0.993,0.945,0.886,0.943,0.901,0.96	0.868,0.958,0.976,0.958,0.987	-0.002	SE
2133	Choren_v00_mik.OX359192.1G816	NA	chrOX359192.1	+	6032878	6032891	6032732	6032796	6032985	6033052	2133	6,58,285,73,94,89,132,19	0,6,36,6,31,6,22,5	43,17,26,44,27	7,0,2,4,6	162	149	0.245712	1	1.0,0.899,0.879,0.918,0.736,0.932,0.847,0.778	0.85,1.0,0.923,0.91,0.805	-0.024	SE
1713	Choren_v00_mik.OX359197.1G966	NA	chrOX359197.1	-	6852634	6852761	6852348	6852425	6853159	6853217	1713	8.3851e+22	0,0,0,0,0,1,3,5	246186294993119	5,7,3,4,0	276	149	0.249936	1	1.0,1.0,1.0,1.0,1.0,0.989,0.98,0.982	0.964,0.935,0.981,0.993,1.0	0.019	SE
4275	Choren_v00_mik.OX359191.1G1268	NA	chrOX359191.1	+	9401129	9401226	9400714	9400793	9401875	9401937	4275	9.62017e+22	0,4,32,8,2,1,30,17	5.5418e+16	7,2,32,9,5	246	149	0.250681	1	1.0,0.989,0.969,0.979,0.995,0.996,0.953,0.937	0.98,0.982,0.951,0.99,0.989	-0.001	SE
3055	Choren_v00_mik.OX359191.1G46	NA	chrOX359191.1	+	203293	204079	201649	201907	206359	206609	3055	0,12,2,12,16,11,6,4	4,229,357,71,221,202,144,77	7,1,1,12,1	152,61,96,134,105	298	149	0.251907	1	0.0,0.026,0.003,0.078,0.035,0.027,0.02,0.025	0.023,0.008,0.005,0.043,0.005	0.01	SE
230	Choren_v00_mik.OX359202.1G241	NA	chrOX359202.1	+	1061135	1061275	1060686	1060767	1062059	1062169	230	1,81,216,59,109,60,57,40	0,0,0,0,4,0,0,0	142,32,287,145,220	0,0,0,4,8	289	149	0.254554	1	1.0,1.0,1.0,1.0,0.934,1.0,1.0,1.0	1.0,1.0,1.0,0.949,0.934	0.015	SE
3173	Choren_v00_mik.OX359192.1G822	NA	chrOX359192.1	+	6058687	6058748	6058472	6058571	6059004	6059114	3173	1,23,63,27,15,22,21,10	0,13,0,0,0,0,0,0	53,14,23,31,34	2,0,0,0,1	210	149	0.254717	1	1.0,0.557,1.0,1.0,1.0,1.0,1.0,1.0	0.95,1.0,1.0,1.0,0.96	-0.037	SE
3056	Choren_v00_mik.OX359191.1G46	NA	chrOX359191.1	+	203293	206221	201649	201907	206359	206609	3056	0,17,0,4,3,6,0,27	4,229,357,71,221,202,144,77	16,0,3,4,11	152,61,96,134,105	298	149	0.25585	1	0.0,0.036,0.0,0.027,0.007,0.015,0.0,0.149	0.05,0.0,0.015,0.015,0.05	0.003	SE
1508	Choren_v00_mik.OX359198.1G568	NA	chrOX359198.1	-	4555042	4555188	4553912	4554353	4555351	4555516	1508	3,9,46,47,18,4,5,19	0,1,8,0,5,0,4,3	58,2,4,8,3	4,0,9,0,16	295	149	0.256059	1	1.0,0.82,0.744,1.0,0.645,1.0,0.387,0.762	0.88,1.0,0.183,1.0,0.087	0.165	SE
1094	Choren_v00_mik.OX359199.1G657	NA	chrOX359199.1	-	4970986	4971027	4970563	4970640	4971194	4971280	1094	3,76,230,61,64,83,56,105	0,0,0,0,0,0,0,0	82,36,35,153,42	0,0,0,10,0	190	149	0.261954	1	1.0,1.0,1.0,1.0,1.0,1.0,1.0,1.0	1.0,1.0,1.0,0.923,1.0	0.015	SE
5668	Choren_v00_mik.OX359193.1G39	NA	chrOX359193.1	+	186267	186382	186154	186191	186645	186731	5668	3.63521e+29	0,5,9,4,0,4,8,9	2516,613,99,894,622	31,1,0,7,1	264	149	0.266205	1	1.0,0.997,0.999,0.997,1.0,0.995,0.996,0.987	0.979,0.997,1.0,0.986,0.997	0.005	SE
7055	Choren_v00_mik.OX359199.1G216	NA	chrOX359199.1	+	1124440	1124513	1122202	1122425	1126962	1127152	7055	1,65,204,31,67,23,25,43	0,0,8,1,0,2,0,0	29,25,35,51,24	0,0,4,2,2	222	149	0.266875	1	1.0,1.0,0.945,0.954,1.0,0.885,1.0,1.0	1.0,1.0,0.854,0.945,0.89	0.035	SE
5709	Choren_v00_mik.OX359192.1G1301	NA	chrOX359192.1	+	8431944	8431976	8431811	8431886	8432057	8432123	5709	3,47,118,33,51,98,113,42	0,0,4,0,1,0,0,0	34,16,41,7,36	0,0,3,4,0	181	149	0.267571	1	1.0,1.0,0.96,1.0,0.977,1.0,1.0,1.0	1.0,1.0,0.918,0.59,1.0	0.091	SE
660	Choren_v00_mik.OX359200.1G765	NA	chrOX359200.1	-	5524531	5524652	5523622	5523670	5529942	5530028	660	2,169,545,136,82,88,119,46	0,0,0,0,0,0,0,0	78,49,74,110,202	0,0,0,0,10	270	149	0.273105	1	1.0,1.0,1.0,1.0,1.0,1.0,1.0,1.0	1.0,1.0,1.0,1.0,0.918	0.016	SE
110	Choren_v00_mik.OX359202.1G665	NA	chrOX359202.1	-	4895819	4895879	4895578	4895677	4896871	4896908	110	1,104,61,47,62,85,173,80	0,131,307,129,206,29,24,92	44,7,53,54,13	125,8,49,62,60	209	149	0.274059	1	1.0,0.361,0.124,0.206,0.177,0.676,0.837,0.383	0.201,0.384,0.435,0.383,0.134	0.163	SE
4689	Choren_v00_mik.OX359189.1G258	NA	chrOX359189.1	-	1290681	1290746	1289265	1289343	1291227	1291312	4689	1.43698e+22	0,3,21,4,7,3,5,4	356,105,127,142,54	8,0,2,1,0	214	149	0.275818	1	1.0,0.988,0.962,0.99,0.981,0.981,0.976,0.973	0.969,1.0,0.978,0.99,1.0	-0.006	SE
5123	Choren_v00_mik.OX359191.1G57	NA	chrOX359191.1	+	303899	304020	303744	303822	304091	304198	5123	2,46,192,598,123,12,74,253	0,29,0,0,0,0,0,0	34,23,152,3,73	11,0,0,0,0	270	149	0.277273	1	1.0,0.467,1.0,1.0,1.0,1.0,1.0,1.0	0.63,1.0,1.0,1.0,1.0	0.007	SE
5154	Choren_v00_mik.OX359192.1G304	NA	chrOX359192.1	+	1868935	1870072	1867824	1868063	1870480	1870632	5154	0,43,79,47,6,55,15,8	2,25,44,29,2,48,6,13	17,17,34,12,3	16,21,40,10,1	298	149	0.284106	1	0.0,0.462,0.473,0.448,0.6,0.364,0.556,0.235	0.347,0.288,0.298,0.375,0.6	0.011	SE
7060	Choren_v00_mik.OX359199.1G216	NA	chrOX359199.1	+	1126962	1127152	1124440	1124513	1129324	1129533	7060	3,131,368,92,126,85,58,93	1,2,13,4,6,0,1,0	84,45,105,70,33	4,2,1,0,0	298	149	0.285709	1	0.6,0.97,0.934,0.92,0.913,1.0,0.967,1.0	0.913,0.918,0.981,1.0,1.0	-0.049	SE
4692	Choren_v00_mik.OX359202.1G867	NA	chrOX359202.1	-	6169212	6169275	6169079	6169116	6169590	6169624	4692	2,63,121,9,37,32,29,23	0,0,2,0,0,2,0,0	30,16,11,41,6	0,3,4,0,0	212	149	0.29056	1	1.0,1.0,0.977,1.0,1.0,0.918,1.0,1.0	1.0,0.789,0.659,1.0,1.0	0.097	SE
6755	Choren_v00_mik.OX359193.1G1092	NA	chrOX359193.1	+	6989865	6989971	6989543	6989653	6990164	6990265	6755	1.13248e+22	1,33,107,24,13,13,73,11	420,96,415,504,286	23,5,79,59,62	255	149	0.295179	1	0.865,0.852,0.817,0.911,0.903,0.879,0.722,0.901	0.914,0.918,0.754,0.833,0.729	0.027	SE
684	Choren_v00_mik.OX359200.1G648	NA	chrOX359200.1	+	4756773	4756966	4756238	4756320	4757618	4757802	684	2,84,188,52,54,41,19,17	0,1,40,2,18,0,1,1	40,7,17,32,28	0,0,8,6,7	298	149	0.296863	1	1.0,0.977,0.701,0.929,0.6,1.0,0.905,0.895	1.0,1.0,0.515,0.727,0.667	0.094	SE
6974	Choren_v00_mik.OX359199.1G919	NA	chrOX359199.1	+	6432908	6432977	6432064	6432575	6433076	6433460	6974	1,55,153,41,51,35,66,40	0,47,182,88,61,63,77,107	38,8,134,56,129	109,13,71,70,36	218	149	0.2994	1	1.0,0.444,0.365,0.242,0.364,0.275,0.369,0.204	0.192,0.296,0.563,0.353,0.71	-0.015	SE
6764	Choren_v00_mik.OX359193.1G1107	NA	chrOX359193.1	+	7043411	7043443	7043299	7043342	7043562	7043632	6764	1.05262e+23	0,9,105,20,1,7,6,2	130211276173231	5,1,10,11,7	181	149	0.301361	1	1.0,0.98,0.926,0.927,0.996,0.974,0.982,0.983	0.955,0.994,0.958,0.928,0.964	0.011	SE
7682	Choren_v00_mik.OX359190.1G1170	NA	chrOX359190.1	-	8467857	8467924	8467540	8467625	8468538	8468711	7682	0,5,1,5,0,6,32,5	1,150,452,97,175,123,245,69	11,0,0,2,0	130,24,63,76,23	216	149	0.30503	1	0.0,0.022,0.002,0.034,0.0,0.033,0.083,0.048	0.055,0.0,0.0,0.018,0.0	0.013	SE
1088	Choren_v00_mik.OX359199.1G665	NA	chrOX359199.1	+	5045690	5045807	5045210	5045331	5046140	5046218	1088	1.54281e+24	0,0,0,0,0,0,2,0	438,132,326,360,96	0,0,0,0,12	266	149	0.307744	1	1.0,1.0,1.0,1.0,1.0,1.0,0.997,1.0	1.0,1.0,1.0,1.0,0.818	0.036	SE
431	Choren_v00_mik.OX359201.1G604	NA	chrOX359201.1	+	4653118	4653184	4652964	4653016	4653243	4653316	431	1.11265e+26	0,16,72,26,20,47,33,41	7443946201330290	28,17,29,19,6	215	149	0.310499	1	1.0,0.982,0.975,0.963,0.971,0.95,0.957,0.928	0.948,0.941,0.937,0.98,0.972	0.01	SE
967	Choren_v00_mik.OX359199.1G995	NA	chrOX359199.1	-	6767142	6767304	6764893	6765018	6767511	6767601	967	1.82711e+23	0,10,20,0,2,1,6,6	5.16179e+16	7,4,13,0,31	298	149	0.314586	1	1.0,0.931,0.968,1.0,0.993,0.994,0.986,0.964	0.974,0.957,0.979,1.0,0.961	0.005	SE
3585	Choren_v00_mik.OX359202.1G573	NA	chrOX359202.1	-	4201366	4201506	4201086	4201203	4201983	4202142	3585	1.22225e+22	0,1,13,4,7,3,15,0	262,116,122,49,42	6,3,2,0,2	289	149	0.315347	1	1.0,0.991,0.951,0.963,0.943,0.956,0.864,1.0	0.957,0.952,0.969,1.0,0.915	0	SE
4978	Choren_v00_mik.OX359196.1G1091	NA	chrOX359196.1	+	7223405	7223570	7222326	7222423	7223775	7223959	4978	2,67,695,67,158,77,75,54	0,1,0,0,2,0,0,0	34,8,582,229,855	0,0,5,4,8	298	149	0.315626	1	1.0,0.971,1.0,1.0,0.975,1.0,1.0,1.0	1.0,1.0,0.983,0.966,0.982	0.007	SE
1428	Choren_v00_mik.OX359198.1G814	NA	chrOX359198.1	+	6143229	6143320	6142824	6142936	6143505	6143768	1428	2,161,555,207,133,114,237,77	0,0,0,0,0,0,2,0	176,77,473,268,246	0,2,6,8,0	240	149	0.316125	1	1.0,1.0,1.0,1.0,1.0,1.0,0.987,1.0	1.0,0.96,0.98,0.954,1.0	0.02	SE
5636	Choren_v00_mik.OX359192.1G754	NA	chrOX359192.1	-	5753835	5753910	5753719	5753780	5753979	5754209	5636	1,102,380,46,78,30,76,58	0,0,7,0,7,0,4,1	27,39,286,165,296	0,0,4,10,8	224	149	0.320755	1	1.0,1.0,0.973,1.0,0.881,1.0,0.927,0.975	1.0,1.0,0.979,0.916,0.961	-0.002	SE
3952	Choren_v00_mik.OX359199.1G111	NA	chrOX359199.1	+	544821	545136	544499	544613	546008	546130	3952	0,29,116,15,17,28,9,10	2,6,37,3,1,2,0,0	9,10,20,26,6	1,3,2,7,3	298	149	0.323207	1	0.0,0.707,0.611,0.714,0.895,0.875,1.0,1.0	0.818,0.625,0.833,0.65,0.5	0.04	SE
545	Choren_v00_mik.OX359201.1G197	NA	chrOX359201.1	-	976936	976975	976375	976434	977476	977510	545	1,59,212,51,28,59,99,34	0,2,16,0,2,0,5,2	36,18,36,63,19	0,0,2,4,2	188	149	0.326441	1	1.0,0.959,0.913,1.0,0.917,1.0,0.94,0.931	1.0,1.0,0.934,0.926,0.883	0.009	SE
3788	Choren_v00_mik.OX359192.1G331	NA	chrOX359192.1	-	2057724	2057771	2057302	2057375	2058184	2058241	3788	7.24811e+22	0,31,124,27,26,30,41,28	266,79,191,707,70	41,10,17,41,15	196	149	0.330893	1	1.0,0.859,0.866,0.864,0.917,0.848,0.798,0.861	0.831,0.857,0.895,0.929,0.78	0.018	SE
5205	Choren_v00_mik.OX359190.1G746	NA	chrOX359190.1	-	4871876	4872243	4871657	4871763	4872392	4872546	5205	1.96012e+24	1,0,1,0,0,0,0,0	669222834864727	4,0,8,0,14	298	149	0.331435	1	0.905,1.0,0.999,1.0,1.0,1.0,1.0,1.0	0.988,1.0,0.981,1.0,0.963	0.002	SE
7620	Choren_v00_mik.OX359197.1G117	NA	chrOX359197.1	+	572690	572765	570981	571228	573468	573926	7620	5.18564e+21	0,5,7,0,0,0,4,9	161,45,64,83,49	0,0,0,6,0	224	149	0.33228	1	1.0,0.961,0.984,1.0,1.0,1.0,0.976,0.936	1.0,1.0,1.0,0.902,1.0	0.002	SE
13	Choren_v00_mik.OX359202.1G973	NA	chrOX359202.1	+	6564203	6564306	6564042	6564140	6564379	6564478	13	1,48,171,48,30,84,170,34	0,0,0,0,0,0,0,0	46,32,241,172,291	0,0,3,0,9	252	149	0.332861	1	1.0,1.0,1.0,1.0,1.0,1.0,1.0,1.0	1.0,1.0,0.979,1.0,0.95	0.014	SE
1907	Choren_v00_mik.OX359197.1G982	NA	chrOX359197.1	-	6935230	6935636	6934636	6934845	6935853	6935980	1907	2,120,242,98,165,150,301,193	0,15,10,12,4,9,32,8	115,30,80,86,75	2,0,11,4,6	298	149	0.334145	1	1.0,0.8,0.924,0.803,0.954,0.893,0.825,0.923	0.966,1.0,0.784,0.915,0.862	-0.015	SE
8199	Choren_v00_mik.OX359196.1G492	NA	chrOX359196.1	+	4235464	4235553	4235170	4235223	4235843	4235886	8199	2,109,392,19,144,106,29,34	0,0,20,2,0,0,0,0	29,15,157,194,186	5,4,0,0,1	238	149	0.334536	1	1.0,1.0,0.925,0.856,1.0,1.0,1.0,1.0	0.784,0.701,1.0,1.0,0.991	0.077	SE
5957	Choren_v00_mik.OX359196.1G1256	NA	chrOX359196.1	-	8036483	8036520	8036332	8036418	8036579	8036757	5957	1,86,355,194,164,145,140,51	0,0,4,1,0,0,0,0	180,19,332,142,295	0,0,10,4,2	186	149	0.334655	1	1.0,1.0,0.986,0.994,1.0,1.0,1.0,1.0	1.0,1.0,0.964,0.966,0.992	0.013	SE
2310	Choren_v00_mik.OX359189.1G571	NA	chrOX359189.1	+	3221954	3221978	3221095	3221225	3222060	3222141	2310	1,4,21,1,7,0,2,0	0,116,466,75,163,96,94,60	0,3,0,0,2	41,33,74,135,38	173	149	0.337706	1	1.0,0.029,0.037,0.011,0.036,0.0,0.018,0.0	0.0,0.073,0.0,0.0,0.043	0.118	SE
5585	Choren_v00_mik.OX359192.1G154	NA	chrOX359192.1	+	853813	853962	852979	853047	854432	854565	5585	1,110,221,107,117,141,312,99	0,0,0,0,0,0,0,0	205,96,188,105,377	0,0,12,0,0	298	149	0.340358	1	1.0,1.0,1.0,1.0,1.0,1.0,1.0,1.0	1.0,1.0,0.887,1.0,1.0	0.023	SE
3393	Choren_v00_mik.OX359198.1G658	NA	chrOX359198.1	-	5077334	5077372	5076403	5076619	5078398	5078514	3393	2,10,37,13,17,7,1,15	0,15,191,31,32,47,16,54	16,0,14,21,5	38,18,76,92,36	187	149	0.343587	1	1.0,0.347,0.134,0.25,0.297,0.106,0.047,0.181	0.251,0.0,0.128,0.154,0.1	0.169	SE
1799	Choren_v00_mik.OX359198.1G841	NA	chrOX359198.1	-	6402221	6402275	6401455	6401602	6403183	6403262	1799	4,113,196,50,139,69,142,104	0,0,14,1,2,0,3,0	46,16,48,108,30	0,0,0,4,2	203	149	0.344125	1	1.0,1.0,0.911,0.973,0.981,1.0,0.972,1.0	1.0,1.0,1.0,0.952,0.917	0.006	SE
2137	Choren_v00_mik.OX359192.1G1388	NA	chrOX359192.1	+	8893700	8893773	8892928	8893008	8893834	8894037	2137	3,102,705,129,292,110,247,66	0,2,7,4,0,0,0,0	182,34,164,222,78	3,0,6,3,0	222	149	0.347811	1	1.0,0.972,0.985,0.956,1.0,1.0,1.0,1.0	0.976,1.0,0.948,0.98,1.0	0.008	SE
2905	Choren_v00_mik.OX359201.1G45	NA	chrOX359201.1	-	229444	229533	229274	229366	229713	230136	2905	2,623,77,313,27,155,371,52	0,21,0,0,0,1,0,0	72,37,47,31,36	1,3,0,0,0	238	149	0.353209	1	1.0,0.949,1.0,1.0,1.0,0.99,1.0,1.0	0.978,0.885,1.0,1.0,1.0	0.02	SE
6470	Choren_v00_mik.OX359197.1G67	NA	chrOX359197.1	-	312262	312394	311818	311916	313186	313247	6470	1.24091e+23	6,116,489,100,100,56,78,39	335100357330257	104,25,99,23,45	281	149	0.357177	1	0.515,0.652,0.589,0.631,0.773,0.747,0.761,0.727	0.631,0.68,0.657,0.884,0.752	-0.046	SE
7265	Choren_v00_mik.OX359202.1G953	NA	chrOX359202.1	+	6499830	6499877	6499512	6499611	6500478	6500598	7265	7,294,1347,19,595,73,34,421	1,21,67,1,18,8,4,13	105,23,69,93,190	2,0,1,3,31	196	149	0.359641	1	0.842,0.914,0.939,0.935,0.962,0.874,0.866,0.961	0.976,1.0,0.981,0.959,0.823	-0.036	SE
7122	Choren_v00_mik.OX359199.1G769	NA	chrOX359199.1	-	5530795	5530904	5530554	5530708	5530987	5531144	7122	1,72,95,44,45,14,26,31	0,0,2,0,0,0,0,0	21,4,153,70,18	0,0,2,0,5	258	149	0.364265	1	1.0,1.0,0.965,1.0,1.0,1.0,1.0,1.0	1.0,1.0,0.978,1.0,0.675	0.065	SE
807	Choren_v00_mik.OX359200.1G251	NA	chrOX359200.1	-	1154955	1155025	1154836	1154896	1155560	1155805	807	2,125,261,47,57,71,43,69	0,1,0,0,0,0,0,0	29,39,41,121,12	0,0,0,8,0	219	149	0.369094	1	1.0,0.988,1.0,1.0,1.0,1.0,1.0,1.0	1.0,1.0,1.0,0.911,1.0	0.016	SE
6161	Choren_v00_mik.OX359194.1G1144	NA	chrOX359194.1	-	8677694	8677791	8677434	8677632	8677845	8677901	6161	2,279,207,36,263,287,196,262	0,0,0,0,1,2,0,3	48,113,210,322,68	2,0,8,2,0	246	149	0.37029	1	1.0,1.0,1.0,1.0,0.994,0.989,1.0,0.981	0.936,1.0,0.941,0.99,1.0	0.022	SE
5254	Choren_v00_mik.OX359193.1G74	NA	chrOX359193.1	-	262328	262401	262177	262275	262692	262750	5254	2,80,134,32,80,48,220,105	0,5,9,3,3,1,8,1	37,96,22,400,10	0,2,2,13,1	222	149	0.372787	1	1.0,0.915,0.909,0.877,0.947,0.97,0.949,0.986	1.0,0.97,0.881,0.954,0.87	0.009	SE
7832	Choren_v00_mik.OX359192.1G882	NA	chrOX359192.1	-	6377362	6377429	6376848	6376904	6377834	6377907	7832	2,35,278,105,144,114,8,12	0,0,0,0,0,0,0,0	216,45,21,125,71	0,0,0,10,0	216	149	0.372957	1	1.0,1.0,1.0,1.0,1.0,1.0,1.0,1.0	1.0,1.0,1.0,0.896,1.0	0.021	SE
2356	Choren_v00_mik.OX359201.1G94	NA	chrOX359201.1	+	468491	468524	468360	468429	469253	469485	2356	0,0,4,0,8,1,0,2	5,86,89,17,163,34,19,18	5,0,2,3,13	166,4,174,51,293	182	149	0.381252	1	0.0,0.0,0.035,0.0,0.039,0.024,0.0,0.083	0.024,0.0,0.009,0.046,0.035	0	SE
6570	Choren_v00_mik.OX359201.1G42	NA	chrOX359201.1	+	222509	222569	221806	221973	222853	222928	6570	0,121,526,77,144,108,185,40	12,81,285,118,108,81,134,105	44,14,56,24,17	97,34,39,32,17	209	149	0.38211	1	0.0,0.516,0.568,0.318,0.487,0.487,0.496,0.214	0.244,0.227,0.506,0.348,0.416	0.038	SE
5405	Choren_v00_mik.OX359196.1G1079	NA	chrOX359196.1	-	7137205	7137350	7137020	7137107	7137473	7137505	5405	2,88,169,86,58,59,83,52	0,0,9,2,1,2,0,0	37,39,99,37,13	0,1,2,5,1	294	149	0.382779	1	1.0,1.0,0.905,0.956,0.967,0.937,1.0,1.0	1.0,0.952,0.962,0.789,0.868	0.056	SE
3719	Choren_v00_mik.OX359192.1G621	NA	chrOX359192.1	-	5045687	5045770	5042956	5043236	5051916	5052030	3719	2.19443e+21	0,0,3,0,0,0,6,0	110,22,22,200,25	0,0,0,9,0	232	149	0.387483	1	1.0,1.0,0.989,1.0,1.0,1.0,0.962,1.0	1.0,1.0,1.0,0.935,1.0	0.007	SE
2810	Choren_v00_mik.OX359193.1G1204	NA	chrOX359193.1	+	7510257	7510363	7510046	7510173	7510778	7510880	2810	7.3167e+21	0,3,5,0,0,1,0,2	261,116,202,407,96	2,0,2,8,2	255	149	0.392125	1	1.0,0.984,0.988,1.0,1.0,0.994,1.0,0.991	0.987,1.0,0.983,0.967,0.966	0.014	SE
8233	Choren_v00_mik.OX359202.1G303	NA	chrOX359202.1	+	1399842	1399926	1399289	1399404	1400383	1400429	8233	4,128,51,44,27,4,63,10	0,0,0,0,10,0,2,0	47,21,30,177,13	0,0,4,0,0	233	149	0.393124	1	1.0,1.0,1.0,1.0,0.633,1.0,0.953,1.0	1.0,1.0,0.827,1.0,1.0	-0.017	SE
8286	Choren_v00_mik.OX359196.1G692	NA	chrOX359196.1	+	5299515	5299552	5299236	5299335	5300072	5300249	8286	2,72,151,71,66,30,141,29	0,0,6,0,0,1,12,0	73,60,950,543,1951	0,0,15,5,37	186	149	0.395857	1	1.0,1.0,0.953,1.0,1.0,0.96,0.904,1.0	1.0,1.0,0.981,0.989,0.977	-0.012	SE
971	Choren_v00_mik.OX359199.1G995	NA	chrOX359199.1	-	6771920	6772099	6769337	6769472	6772626	6772735	971	1.21888e+21	0,0,2,0,0,0,0,0	2.38117e+16	4,2,12,1,7	298	149	0.400642	1	1.0,1.0,0.995,1.0,1.0,1.0,1.0,1.0	0.967,0.967,0.977,0.997,0.99	0.02	SE
5621	Choren_v00_mik.OX359189.1G718	NA	chrOX359189.1	-	4756138	4756249	4754489	4754552	4758725	4758898	5621	2,121,524,197,135,98,190,141	0,0,9,4,0,0,0,6	147,58,78,119,38	0,1,1,1,0	260	149	0.408915	1	1.0,1.0,0.971,0.966,1.0,1.0,1.0,0.931	1.0,0.971,0.978,0.986,1.0	-0.003	SE
5140	Choren_v00_mik.OX359195.1G912	NA	chrOX359195.1	+	6620684	6620797	6619991	6620037	6620885	6621068	5140	11,773,2372,84,518,24,388,939	0,2,8,1,1,0,3,9	69,9,260,210,31	0,0,5,5,0	262	149	0.415556	1	1.0,0.995,0.994,0.979,0.997,1.0,0.987,0.983	1.0,1.0,0.967,0.96,1.0	0.006	SE
7058	Choren_v00_mik.OX359199.1G216	NA	chrOX359199.1	+	1126962	1127152	1122202	1122425	1129324	1129533	7058	2,82,234,70,81,67,37,67	0,3,8,0,0,0,2,0	66,28,73,35,18	0,0,0,0,0	298	149	0.415567	1	1.0,0.932,0.936,1.0,1.0,1.0,0.902,1.0	1.0,1.0,1.0,1.0,1.0	-0.029	SE
1545	Choren_v00_mik.OX359198.1G418	NA	chrOX359198.1	+	2732375	2732883	2731605	2731737	2735520	2735655	1545	0,8,54,14,22,6,28,12	5.2661e+22	9,2,15,27,13	230,71,306,253,252	298	149	0.416958	1	0.0,0.015,0.026,0.02,0.034,0.012,0.033,0.024	0.019,0.014,0.024,0.051,0.025	-0.006	SE
8133	Choren_v00_mik.OX359196.1G315	NA	chrOX359196.1	+	2057821	2058029	2055240	2055295	2058211	2058383	8133	3,240,719,93,114,67,127,169	0,6,0,0,0,0,0,1	62,53,305,258,1066	0,1,0,1,15	298	149	0.42036	1	1.0,0.952,1.0,1.0,1.0,1.0,1.0,0.988	1.0,0.964,1.0,0.992,0.973	0.007	SE
934	Choren_v00_mik.OX359199.1G1038	NA	chrOX359199.1	+	6985179	6985336	6984706	6984837	6985982	6986171	934	1.88513e+23	0,2,15,6,7,6,26,5	5.03212e+17	0,2,26,9,28	298	149	0.42062	1	1.0,0.995,0.988,0.98,0.984,0.981,0.949,0.976	1.0,0.981,0.972,0.989,0.968	0	SE
4016	Choren_v00_mik.OX359191.1G556	NA	chrOX359191.1	+	5059111	5059197	5057237	5057302	5066237	5066374	4016	1,4,20,7,7,13,13,13	0,67,232,76,49,32,54,65	2,1,21,8,36	47,13,263,111,226	235	149	0.421259	1	1.0,0.036,0.052,0.055,0.083,0.205,0.132,0.113	0.026,0.047,0.048,0.044,0.092	0.158	SE
4353	Choren_v00_mik.OX359194.1G165	NA	chrOX359194.1	-	1433653	1433750	1433243	1433372	1433850	1433906	4353	1,141,177,15,190,38,44,82	0,0,0,0,3,0,5,0	32,1,41,42,64	7,0,0,1,0	246	149	0.425649	1	1.0,1.0,1.0,1.0,0.975,1.0,0.842,1.0	0.735,1.0,1.0,0.962,1.0	0.038	SE
7480	Choren_v00_mik.OX359194.1G971	NA	chrOX359194.1	+	7742293	7742364	7741953	7742106	7742850	7743053	7480	3,185,688,114,138,233,193,96	2,1,13,2,1,2,0,2	156103748468508	0,0,1,0,2	220	149	0.428388	1	0.504,0.992,0.973,0.975,0.989,0.987,1.0,0.97	1.0,1.0,0.998,1.0,0.994	-0.075	SE
2128	Choren_v00_mik.OX359193.1G122	NA	chrOX359193.1	-	458137	458298	457993	458074	458391	458520	2128	1,146,269,83,183,83,36,101	0,0,0,0,0,0,0,0	37,61,20,127,95	0,0,0,2,4	298	149	0.42976	1	1.0,1.0,1.0,1.0,1.0,1.0,1.0,1.0	1.0,1.0,1.0,0.969,0.922	0.022	SE
6549	Choren_v00_mik.OX359197.1G418	NA	chrOX359197.1	+	2599694	2599737	2594235	2594333	2601260	2601535	6549	1,40,175,26,18,27,26,25	0,5,11,4,0,2,0,3	32,10,61,55,74	4,0,1,7,9	192	149	0.431036	1	1.0,0.861,0.925,0.835,1.0,0.913,1.0,0.866	0.861,1.0,0.979,0.859,0.865	0.012	SE
7084	Choren_v00_mik.OX359193.1G398	NA	chrOX359193.1	-	2233678	2233964	2232522	2232636	2235234	2235706	7084	2,37,92,17,32,13,38,29	0,0,0,0,0,0,0,0	10,12,97,85,37	2,0,0,0,4	298	149	0.435689	1	1.0,1.0,1.0,1.0,1.0,1.0,1.0,1.0	0.714,1.0,1.0,1.0,0.822	0.093	SE
2913	Choren_v00_mik.OX359191.1G289	NA	chrOX359191.1	-	1843672	1843805	1843306	1843464	1843874	1844099	2913	6,504,1090,861,130,185,182,66	0,7,17,2,2,0,0,0	737,79,298,128,42	0,0,1,0,0	282	149	0.436513	1	1.0,0.974,0.971,0.996,0.972,1.0,1.0,1.0	1.0,1.0,0.994,1.0,1.0	-0.01	SE
6914	Choren_v00_mik.OX359193.1G1020	NA	chrOX359193.1	-	6497159	6497233	6496801	6496961	6497882	6497915	6914	4.11715e+24	0,35,104,22,13,26,38,14	610285488826383	22,0,64,5,31	223	149	0.43844	1	1.0,0.957,0.764,0.941,0.985,0.974,0.943,0.958	0.949,1.0,0.836,0.991,0.892	0.007	SE
3579	Choren_v00_mik.OX359189.1G363	NA	chrOX359189.1	-	1924559	1924677	1924178	1924275	1924916	1924999	3579	1,80,223,42,36,40,27,94	0,0,0,0,0,0,0,0	20,24,155,42,62	0,0,6,0,0	267	149	0.440904	1	1.0,1.0,1.0,1.0,1.0,1.0,1.0,1.0	1.0,1.0,0.935,1.0,1.0	0.013	SE
3355	Choren_v00_mik.OX359199.1G783	NA	chrOX359199.1	+	5595274	5595371	5594863	5595090	5595987	5596091	3355	1,226,657,137,213,157,85,124	0,0,2,0,0,0,0,0	81,47,127,166,50	1,0,2,0,6	246	149	0.448651	1	1.0,1.0,0.995,1.0,1.0,1.0,1.0,1.0	0.98,1.0,0.975,1.0,0.835	0.041	SE
6417	Choren_v00_mik.OX359193.1G479	NA	chrOX359193.1	+	2875484	2875542	2875230	2875303	2876003	2876094	6417	1,170,565,162,270,93,280,172	0,6,65,5,3,11,14,14	189,43,331,294,181	7,5,9,20,34	207	149	0.44951	1	1.0,0.953,0.862,0.959,0.985,0.859,0.935,0.898	0.951,0.861,0.964,0.914,0.793	0.035	SE
5483	Choren_v00_mik.OX359198.1G383	NA	chrOX359198.1	+	2285407	2285439	2276165	2276282	2286078	2286096	5483	0,1,18,3,9,8,2,2	2,6,121,7,14,25,5,10	0,0,4,5,6	13,6,30,4,16	181	149	0.453633	1	0.0,0.121,0.109,0.261,0.346,0.209,0.248,0.141	0.0,0.0,0.099,0.507,0.236	0.011	SE
5378	Choren_v00_mik.OX359194.1G191	NA	chrOX359194.1	+	1644423	1644589	1644016	1644235	1644863	1645051	5378	0,30,69,9,40,20,31,22	2,0,2,0,0,2,0,0	33,24,23,75,14	0,0,0,1,0	298	149	0.457036	1	0.0,1.0,0.945,1.0,1.0,0.833,1.0,1.0	1.0,1.0,1.0,0.974,1.0	-0.148	SE
8370	Choren_v00_mik.OX359202.1G396	NA	chrOX359202.1	+	2035400	2035486	2032556	2032694	2036140	2036225	8370	11,603,1644,436,6,324,513,172	0,12,0,6,0,5,6,0	282108150257160	4,0,4,3,3	235	149	0.471506	1	1.0,0.97,1.0,0.979,1.0,0.976,0.982,1.0	0.978,1.0,0.96,0.982,0.971	0.01	SE
6502	Choren_v00_mik.OX359197.1G967	NA	chrOX359197.1	-	6859941	6860257	6858024	6858203	6860572	6860764	6502	4,173,451,134,119,155,182,95	0,4,3,9,0,0,0,9	164,99,1511,524,1316	4,0,27,4,5	298	149	0.473893	1	1.0,0.956,0.987,0.882,1.0,1.0,1.0,0.841	0.953,1.0,0.965,0.985,0.992	-0.021	SE
450	Choren_v00_mik.OX359201.1G571	NA	chrOX359201.1	-	4432992	4433098	4431626	4431724	4434841	4434944	450	1,165,355,117,77,135,175,143	0,3,3,0,0,1,10,0	164,39,348,647,279	1,2,1,8,1	255	149	0.474439	1	1.0,0.97,0.986,1.0,1.0,0.987,0.911,1.0	0.99,0.919,0.995,0.979,0.994	0.006	SE
8360	Choren_v00_mik.OX359193.1G273	NA	chrOX359193.1	-	1328009	1328126	1327826	1327947	1328194	1328263	8360	1,89,338,51,75,55,88,113	0,0,6,0,0,0,0,0	26,28,145,140,101	0,0,0,5,2	266	149	0.477149	1	1.0,1.0,0.969,1.0,1.0,1.0,1.0,1.0	1.0,1.0,1.0,0.94,0.966	0.015	SE
630	Choren_v00_mik.OX359200.1G912	NA	chrOX359200.1	-	6453607	6453643	6453311	6453438	6454191	6454305	630	2,193,38,305,78,266,557,244	1.12032e+22	256,114,68,377,60	384,62,651,684,381	185	149	0.477943	1	0.128,0.434,0.121,0.257,0.162,0.472,0.509,0.289	0.349,0.597,0.078,0.307,0.113	0.008	SE
947	Choren_v00_mik.OX359199.1G1013	NA	chrOX359199.1	-	6874084	6874198	6873939	6873987	6874598	6874690	947	4,59,259,75,75,39,84,61	0,7,11,2,17,2,1,7	29,12,31,24,8	2,1,5,3,2	263	149	0.481023	1	1.0,0.827,0.93,0.955,0.714,0.917,0.979,0.832	0.891,0.872,0.778,0.819,0.694	0.083	SE
4786	Choren_v00_mik.OX359201.1G859	NA	chrOX359201.1	-	6179725	6179815	6179360	6179600	6180244	6180424	4786	5,23,78,26,27,41,13,17	0,2,152,9,8,7,4,1	2,12,52,91,39	0,0,3,36,26	239	149	0.490067	1	1.0,0.878,0.242,0.643,0.678,0.785,0.67,0.914	1.0,1.0,0.915,0.612,0.483	-0.076	SE
6911	Choren_v00_mik.OX359196.1G247	NA	chrOX359196.1	-	1486877	1486972	1485577	1485684	1490463	1490551	6911	1,46,313,51,75,48,34,54	0,0,1,2,4,0,0,0	38,7,177,92,107	0,0,0,1,6	244	149	0.499539	1	1.0,1.0,0.995,0.94,0.92,1.0,1.0,1.0	1.0,1.0,1.0,0.983,0.916	0.002	SE
2091	Choren_v00_mik.OX359200.1G391	NA	chrOX359200.1	-	1875987	1876170	1874757	1875022	1878222	1878311	2091	8.35981e+21	0,8,7,1,0,1,0,2	261,29,306,507,108	2,4,5,1,0	298	149	0.499855	1	1.0,0.957,0.983,0.993,1.0,0.994,1.0,0.981	0.985,0.784,0.968,0.996,1.0	0.042	SE
4363	Choren_v00_mik.OX359198.1G4	NA	chrOX359198.1	+	28498	28596	27922	28049	28659	28849	4363	1.1561e+22	0,0,0,0,0,0,0,0	237,8,264,173,40	0,4,0,0,0	247	149	0.500396	1	1.0,1.0,1.0,1.0,1.0,1.0,1.0,1.0	1.0,0.547,1.0,1.0,1.0	0.091	SE
6818	Choren_v00_mik.OX359193.1G1190	NA	chrOX359193.1	+	7454418	7454484	7453980	7454097	7454807	7454890	6818	0,142,589,192,166,156,289,77	1,163,446,112,181,121,195,53	113,29,92,125,64	83,27,89,58,36	215	149	0.501567	1	0.0,0.376,0.478,0.543,0.389,0.472,0.507,0.502	0.485,0.427,0.417,0.599,0.552	-0.088	SE
5856	Choren_v00_mik.OX359195.1G686	NA	chrOX359195.1	-	5307858	5307981	5307266	5307448	5308593	5308743	5856	2,185,655,120,183,76,269,188	0,2,10,0,2,0,2,0	81,55,191,133,35	0,0,0,2,4	272	149	0.50252	1	1.0,0.981,0.973,1.0,0.98,1.0,0.987,1.0	1.0,1.0,1.0,0.973,0.827	0.03	SE
649	Choren_v00_mik.OX359200.1G830	NA	chrOX359200.1	-	6005631	6005676	6005291	6005377	6005740	6005832	649	2,77,168,65,62,64,100,49	0,0,0,0,0,0,0,0	101,20,54,127,34	4,0,0,3,0	194	149	0.502919	1	1.0,1.0,1.0,1.0,1.0,1.0,1.0,1.0	0.951,1.0,1.0,0.97,1.0	0.016	SE
7722	Choren_v00_mik.OX359192.1G1105	NA	chrOX359192.1	-	7512398	7512664	7512097	7512314	7512954	7513307	7722	4,38,66,34,25,23,49,38	0,0,0,0,0,0,0,0	39,6,58,49,56	6,0,0,0,0	298	149	0.508746	1	1.0,1.0,1.0,1.0,1.0,1.0,1.0,1.0	0.765,1.0,1.0,1.0,1.0	0.047	SE
5344	Choren_v00_mik.OX359194.1G200	NA	chrOX359194.1	-	1698155	1698246	1697854	1697929	1698427	1698493	5344	1,70,132,40,48,22,46,27	0,1,7,1,2,0,0,0	46,11,31,67,18	0,0,5,0,0	240	149	0.51416	1	1.0,0.978,0.921,0.961,0.937,1.0,1.0,1.0	1.0,1.0,0.794,1.0,1.0	0.016	SE
6051	Choren_v00_mik.OX359197.1G59	NA	chrOX359197.1	-	257621	257896	256946	257031	264698	264766	6051	1,212,561,290,213,88,247,262	0,0,0,0,0,0,0,0	267,16,113,189,35	0,0,0,0,6	298	149	0.516712	1	1.0,1.0,1.0,1.0,1.0,1.0,1.0,1.0	1.0,1.0,1.0,1.0,0.745	0.051	SE
70	Choren_v00_mik.OX359202.1G781	NA	chrOX359202.1	-	5562907	5562964	5561885	5561954	5566917	5567073	70	1,61,110,33,63,26,58,52	0,11,21,6,0,6,10,6	43,11,30,30,21	1,3,5,6,3	206	149	0.519293	1	1.0,0.8,0.791,0.799,1.0,0.758,0.808,0.862	0.969,0.726,0.813,0.783,0.835	0.027	SE
3498	Choren_v00_mik.OX359201.1G851	NA	chrOX359201.1	-	6155433	6155574	6155226	6155373	6155630	6155892	3498	5.99348e+23	0,12,47,5,13,4,0,1	7.07238e+17	10,0,15,18,12	290	149	0.520054	1	1.0,0.977,0.981,0.983,0.979,0.99,1.0,0.997	0.973,1.0,0.984,0.981,0.984	0.004	SE
6356	Choren_v00_mik.OX359197.1G384	NA	chrOX359197.1	+	2286605	2286686	2286191	2286273	2288554	2288638	6356	1.34771e+24	0,26,35,12,8,5,30,5	429,157,308,187,85	7,0,16,5,8	230	149	0.520629	1	1.0,0.922,0.962,0.955,0.972,0.985,0.963,0.982	0.975,1.0,0.926,0.96,0.873	0.021	SE
6354	Choren_v00_mik.OX359193.1G336	NA	chrOX359193.1	-	1851348	1851443	1850756	1850856	1851519	1851582	6354	4.19448e+21	0,5,32,6,11,2,0,4	232,49,175,138,222	7,0,20,0,4	244	149	0.520955	1	1.0,0.96,0.902,0.963,0.915,0.978,1.0,0.961	0.953,1.0,0.842,1.0,0.971	0.007	SE
6385	Choren_v00_mik.OX359196.1G772	NA	chrOX359196.1	-	5619990	5620088	5619744	5619855	5620485	5620613	6385	8,81,447,64,182,65,278,63	0,1,1,0,2,0,1,1	127,49,115,126,22	1,2,4,0,0	247	149	0.522617	1	1.0,0.98,0.996,1.0,0.982,1.0,0.994,0.974	0.987,0.937,0.945,1.0,1.0	0.017	SE
3478	Choren_v00_mik.OX359194.1G996	NA	chrOX359194.1	-	7897089	7897265	7896557	7896647	7897667	7897786	3478	6.37915e+22	0,0,8,3,16,7,0,1	206,67,333,345,246	4,0,0,2,6	298	149	0.527511	1	1.0,1.0,0.989,0.967,0.946,0.945,1.0,0.989	0.963,1.0,1.0,0.989,0.953	-0.002	SE
6988	Choren_v00_mik.OX359196.1G1251	NA	chrOX359196.1	-	8004494	8004671	8003844	8003987	8004732	8004839	6988	2,132,632,97,167,145,81,72	0,0,11,0,0,0,3,0	74,20,99,165,26	0,0,0,8,0	298	149	0.533179	1	1.0,1.0,0.966,1.0,1.0,1.0,0.931,1.0	1.0,1.0,1.0,0.912,1.0	0.005	SE
6353	Choren_v00_mik.OX359199.1G987	NA	chrOX359199.1	-	6734322	6734377	6734176	6734232	6734688	6734784	6353	3.22711e+22	0,4,8,0,3,3,3,0	103,61,168,119,177	7,0,3,0,0	204	149	0.533878	1	1.0,0.976,0.99,1.0,0.987,0.977,0.97,1.0	0.915,1.0,0.976,1.0,1.0	0.009	SE
3249	Choren_v00_mik.OX359195.1G1246	NA	chrOX359195.1	+	8300691	8300744	8300321	8300400	8300804	8300841	3249	2,26,37,23,40,30,71,15	0,2,63,2,10,12,5,0	20,6,10,48,5	1,2,4,8,6	202	149	0.533959	1	1.0,0.906,0.302,0.895,0.747,0.648,0.913,1.0	0.937,0.689,0.648,0.816,0.381	0.107	SE
943	Choren_v00_mik.OX359199.1G1019	NA	chrOX359199.1	-	6896844	6896896	6894512	6894598	6902982	6903096	943	2,26,109,36,63,35,47,43	0,6,0,4,0,0,0,0	50,5,22,24,7	0,2,1,0,2	201	149	0.535568	1	1.0,0.763,1.0,0.87,1.0,1.0,1.0,1.0	1.0,0.65,0.942,1.0,0.722	0.091	SE
4412	Choren_v00_mik.OX359189.1G35	NA	chrOX359189.1	-	122433	122548	120213	120307	122624	122719	4412	4,64,72,22,46,79,127,112	0,7,2,0,1,2,0,0	69,21,66,29,34	0,0,0,0,0	264	149	0.539367	1	1.0,0.838,0.953,1.0,0.963,0.957,1.0,1.0	1.0,1.0,1.0,1.0,1.0	-0.036	SE
645	Choren_v00_mik.OX359200.1G839	NA	chrOX359200.1	+	6085991	6086123	6085231	6085576	6086514	6086697	645	2.25395e+21	0,2,13,1,5,4,4,0	177,57,799,212,758	0,0,8,7,5	281	149	0.53947	1	1.0,0.985,0.975,0.99,0.949,0.965,0.978,1.0	1.0,1.0,0.981,0.941,0.988	-0.002	SE
618	Choren_v00_mik.OX359200.1G974	NA	chrOX359200.1	-	6820299	6820414	6819506	6820003	6823135	6823250	618	4,110,249,120,132,206,53,178	0,4,0,0,1,0,1,1	157,92,135,126,94	2,0,6,2,0	264	149	0.541239	1	1.0,0.939,1.0,1.0,0.987,1.0,0.968,0.99	0.978,1.0,0.927,0.973,1.0	0.01	SE
4422	Choren_v00_mik.OX359192.1G76	NA	chrOX359192.1	-	366544	366631	365250	365262	366806	366813	4422	9,252,1010,253,119,93,167,163	0,0,0,0,0,0,0,0	215,50,3021,406,2810	0,0,0,19,0	236	149	0.544842	1	1.0,1.0,1.0,1.0,1.0,1.0,1.0,1.0	1.0,1.0,1.0,0.931,1.0	0.014	SE
2976	Choren_v00_mik.OX359202.1G598	NA	chrOX359202.1	-	4386428	4386470	4386219	4386334	4386544	4386629	2976	4,3,107,122,27,2,9,80	0,0,0,0,0,0,0,0	66,10,11,11,61	6,0,0,0,0	191	149	0.55331	1	1.0,1.0,1.0,1.0,1.0,1.0,1.0,1.0	0.896,1.0,1.0,1.0,1.0	0.021	SE
1824	Choren_v00_mik.OX359201.1G220	NA	chrOX359201.1	-	1094656	1094714	1094413	1094488	1094942	1095024	1824	1,32,85,37,78,33,92,46	0,0,0,3,0,0,9,0	40,12,38,48,16	0,0,0,0,0	207	149	0.556792	1	1.0,1.0,1.0,0.899,1.0,1.0,0.88,1.0	1.0,1.0,1.0,1.0,1.0	-0.028	SE
893	Choren_v00_mik.OX359199.1G1180	NA	chrOX359199.1	+	7574564	7574698	7574099	7574228	7574761	7574798	893	2,154,591,157,94,251,203,179	0,4,9,0,2,4,0,0	195,60,83,264,38	2,0,1,0,0	283	149	0.564824	1	1.0,0.953,0.972,1.0,0.961,0.971,1.0,1.0	0.981,1.0,0.978,1.0,1.0	-0.01	SE
8479	Choren_v00_mik.OX359196.1G1141	NA	chrOX359196.1	+	7482348	7482476	7480109	7480459	7483162	7483332	8479	2.34584e+21	0,0,14,0,4,2,2,0	99,64,338,219,395	1,0,0,2,6	277	149	0.567575	1	1.0,1.0,0.97,1.0,0.961,0.984,0.987,1.0	0.982,1.0,1.0,0.983,0.973	0	SE
1215	Choren_v00_mik.OX359199.1G375	NA	chrOX359199.1	+	2368395	2368524	2365283	2365483	2369228	2369420	1215	2,161,632,90,172,100,105,72	0,1,7,0,0,0,0,0	83,39,245,336,149	0,0,9,2,0	278	149	0.570878	1	1.0,0.989,0.98,1.0,1.0,1.0,1.0,1.0	1.0,1.0,0.936,0.989,1.0	0.011	SE
8483	Choren_v00_mik.OX359196.1G1154	NA	chrOX359196.1	-	7524311	7524343	7524163	7524249	7524399	7524523	8483	2,52,118,42,67,66,90,70	0,0,1,6,0,0,0,2	49,7,62,73,58	0,0,1,2,3	181	149	0.57279	1	1.0,1.0,0.99,0.852,1.0,1.0,1.0,0.966	1.0,1.0,0.981,0.968,0.941	-0.002	SE
6476	Choren_v00_mik.OX359193.1G621	NA	chrOX359193.1	+	4254314	4255035	4252040	4252103	4255406	4255823	6476	1,113,436,76,146,63,128,69	0,1,0,0,0,0,2,0	100,36,151,166,105	2,0,0,5,0	298	149	0.573666	1	1.0,0.983,1.0,1.0,1.0,1.0,0.97,1.0	0.962,1.0,1.0,0.943,1.0	0.013	SE
7788	Choren_v00_mik.OX359193.1G185	NA	chrOX359193.1	+	839403	839486	838965	839008	839569	839659	7788	4.76817e+22	0,4,39,3,6,3,0,1	4301711048335850	6,4,8,0,7	232	149	0.574095	1	1.0,0.992,0.966,0.991,0.985,0.992,1.0,0.997	0.979,0.965,0.988,1.0,0.987	0.007	SE
3806	Choren_v00_mik.OX359192.1G1194	NA	chrOX359192.1	+	7903516	7904098	7901655	7901818	7905132	7905332	3806	2.1676e+21	0,0,0,0,0,0,0,0	149,67,106,26,27	0,0,0,5,0	298	149	0.575461	1	1.0,1.0,1.0,1.0,1.0,1.0,1.0,1.0	1.0,1.0,1.0,0.722,1.0	0.056	SE
6029	Choren_v00_mik.OX359193.1G11	NA	chrOX359193.1	+	96131	96172	95636	96076	96274	96371	6029	1,14,14,47,20,3,5,5	0,0,1,0,0,0,0,6	13,2,2,3,4	0,0,2,0,0	190	149	0.577204	1	1.0,1.0,0.917,1.0,1.0,1.0,1.0,0.395	1.0,1.0,0.44,1.0,1.0	0.026	SE
5320	Choren_v00_mik.OX359193.1G727	NA	chrOX359193.1	-	4729612	4729689	4729421	4729548	4729900	4730117	5320	1,92,334,86,113,61,87,57	0,0,5,0,0,0,0,0	63,24,178,104,175	0,0,4,1,3	226	149	0.5791	1	1.0,1.0,0.978,1.0,1.0,1.0,1.0,1.0	1.0,1.0,0.967,0.986,0.975	0.012	SE
3852	Choren_v00_mik.OX359192.1G1209	NA	chrOX359192.1	+	7962213	7962407	7962029	7962133	7962517	7962618	3852	2,29,124,22,24,35,48,25	0,0,0,0,0,0,8,0	20,6,14,9,9	0,0,0,0,0	298	149	0.582817	1	1.0,1.0,1.0,1.0,1.0,1.0,0.75,1.0	1.0,1.0,1.0,1.0,1.0	-0.031	SE
8134	Choren_v00_mik.OX359196.1G321	NA	chrOX359196.1	-	2074696	2074909	2070016	2070241	2076803	2076930	8134	5.29776e+21	0,9,7,0,4,0,3,0	216,78,199,212,89	0,0,0,0,0	298	149	0.586032	1	1.0,0.943,0.982,1.0,0.959,1.0,0.988,1.0	1.0,1.0,1.0,1.0,1.0	-0.016	SE
744	Choren_v00_mik.OX359200.1G425	NA	chrOX359200.1	-	2136056	2136104	2132066	2132336	2139160	2139504	744	2,127,306,60,32,150,55,78	0,0,0,1,8,0,0,0	53,26,150,290,148	0,0,0,0,0	197	149	0.587741	1	1.0,1.0,1.0,0.978,0.752,1.0,1.0,1.0	1.0,1.0,1.0,1.0,1.0	-0.034	SE
5010	Choren_v00_mik.OX359190.1G451	NA	chrOX359190.1	+	3015126	3015229	3014037	3014114	3015461	3015540	5010	2,95,118,31,1,18,32,79	0,0,11,0,0,0,0,0	4,5,48,19,404	0,0,0,0,0	252	149	0.58987	1	1.0,1.0,0.864,1.0,1.0,1.0,1.0,1.0	1.0,1.0,1.0,1.0,1.0	-0.017	SE
5012	Choren_v00_mik.OX359201.1G215	NA	chrOX359201.1	-	1081793	1081897	1081480	1081606	1082456	1082562	5012	4,227,623,83,185,74,54,64	0,0,0,0,1,0,1,0	33,46,127,431,98	0,0,10,0,0	253	149	0.593519	1	1.0,1.0,1.0,1.0,0.991,1.0,0.97,1.0	1.0,1.0,0.882,1.0,1.0	0.019	SE
7968	Choren_v00_mik.OX359192.1G592	NA	chrOX359192.1	-	4821044	4821085	4820572	4820826	4821819	4821857	7968	5.20964e+21	0,0,0,0,2,0,0,0	152,29,136,127,109	9,0,0,0,0	190	149	0.593841	1	1.0,1.0,1.0,1.0,0.992,1.0,1.0,1.0	0.93,1.0,1.0,1.0,1.0	0.013	SE
3385	Choren_v00_mik.OX359191.1G1200	NA	chrOX359191.1	+	9117664	9117742	9117081	9117200	9117810	9118153	3385	9.1864e+21	0,2,22,8,5,4,5,1	70,40,49,105,23	8,0,2,2,3	227	149	0.599123	1	1.0,0.984,0.923,0.93,0.951,0.962,0.954,0.986	0.852,1.0,0.941,0.972,0.834	0.041	SE
6652	Choren_v00_mik.OX359196.1G1221	NA	chrOX359196.1	+	7903053	7903278	7902491	7902895	7903812	7904007	6652	8.12154e+21	0,1,2,2,0,3,2,2	293101168180179	2,0,0,0,9	298	149	0.600639	1	1.0,0.984,0.993,0.988,1.0,0.973,0.993,0.982	0.987,1.0,1.0,1.0,0.909	0.01	SE
5008	Choren_v00_mik.OX359190.1G451	NA	chrOX359190.1	+	3012643	3012791	3012424	3012569	3012985	3013110	5008	1,6,142,23,11,5,1,15	0,1,0,0,0,0,0,1	4,3,40,15,9	3,0,0,0,0	297	149	0.601903	1	1.0,0.751,1.0,1.0,1.0,1.0,1.0,0.883	0.401,1.0,1.0,1.0,1.0	0.074	SE
5498	Choren_v00_mik.OX359199.1G792	NA	chrOX359199.1	+	5632347	5632416	5628091	5628209	5636903	5637008	5498	2,132,404,68,131,111,82,90	0,0,0,0,2,0,0,0	47,15,17,36,31	0,0,0,6,0	218	149	0.605018	1	1.0,1.0,1.0,1.0,0.978,1.0,1.0,1.0	1.0,1.0,1.0,0.804,1.0	0.036	SE
3234	Choren_v00_mik.OX359199.1G333	NA	chrOX359199.1	-	2089989	2090105	2089151	2089272	2090837	2091143	3234	2,129,606,61,101,83,48,65	0,3,0,0,0,0,7,0	58,15,34,330,15	0,1,0,2,0	265	149	0.60781	1	1.0,0.96,1.0,1.0,1.0,1.0,0.794,1.0	1.0,0.894,1.0,0.989,1.0	-0.007	SE
4273	Choren_v00_mik.OX359196.1G531	NA	chrOX359196.1	+	4444737	4444839	4444134	4444221	4444913	4445140	4273	1,7,110,40,6,18,29,37	0,0,2,4,0,2,0,1	8,14,16,6,12	0,6,0,0,0	251	149	0.608422	1	1.0,1.0,0.97,0.856,1.0,0.842,1.0,0.956	1.0,0.581,1.0,1.0,1.0	0.037	SE
4467	Choren_v00_mik.OX359193.1G389	NA	chrOX359193.1	-	2151561	2151652	2151365	2151463	2151704	2151895	4467	5,7,26,84,23,63,47,60	0,0,2,0,1,0,0,1	43,32,34,64,11	0,0,0,1,4	240	149	0.609539	1	1.0,1.0,0.89,1.0,0.935,1.0,1.0,0.974	1.0,1.0,1.0,0.975,0.631	0.054	SE
4445	Choren_v00_mik.OX359189.1G20	NA	chrOX359189.1	-	54663	54719	53815	53909	54787	54912	4445	4.17261e+21	0,1,14,2,1,4,0,0	225,69,296,226,366	7,0,0,0,9	205	149	0.610892	1	1.0,0.992,0.969,0.992,0.996,0.983,1.0,1.0	0.959,1.0,1.0,1.0,0.967	0.006	SE
7855	Choren_v00_mik.OX359195.1G951	NA	chrOX359195.1	+	6780170	6780188	6779845	6779909	6781448	6781647	7855	0,0,1,0,1,0,1,0	1,14,53,7,49,13,11,9	0,0,2,0,4	14,9,93,14,36	167	149	0.612634	1	0.0,0.0,0.017,0.0,0.018,0.0,0.075,0.0	0.0,0.0,0.019,0.0,0.09	-0.008	SE
6941	Choren_v00_mik.OX359193.1G1396	NA	chrOX359193.1	+	8422046	8422152	8421926	8421985	8422268	8422448	6941	3,148,1058,48,18,188,42,82	0,0,0,0,6,0,0,0	129,1,17,87,8	0,0,0,0,0	255	149	0.615327	1	1.0,1.0,1.0,1.0,0.637,1.0,1.0,1.0	1.0,1.0,1.0,1.0,1.0	-0.045	SE
6547	Choren_v00_mik.OX359197.1G418	NA	chrOX359197.1	+	2593712	2593874	2592004	2592053	2594235	2594333	6547	4,142,619,89,205,73,161,133	0,0,40,8,3,6,2,0	130,39,311,248,153	2,0,0,2,51	298	149	0.61644	1	1.0,1.0,0.886,0.848,0.972,0.859,0.976,1.0	0.97,1.0,1.0,0.984,0.6	0.032	SE
2437	Choren_v00_mik.OX359202.1G676	NA	chrOX359202.1	-	4948795	4949022	4948408	4948542	4949334	4949902	2437	3.24258e+21	0,3,7,0,0,0,0,0	202,63,63,171,51	0,0,7,1,0	298	149	0.618636	1	1.0,0.976,0.976,1.0,1.0,1.0,1.0,1.0	1.0,1.0,0.818,0.988,1.0	0.033	SE
2902	Choren_v00_mik.OX359201.1G45	NA	chrOX359201.1	-	229274	229366	228766	228795	229444	229533	2902	7,592,49,318,20,197,411,47	0,0,0,0,0,0,0,0	79,39,43,26,31	6,0,0,0,0	241	149	0.61948	1	1.0,1.0,1.0,1.0,1.0,1.0,1.0,1.0	0.891,1.0,1.0,1.0,1.0	0.022	SE
3171	Choren_v00_mik.OX359194.1G864	NA	chrOX359194.1	+	7124185	7124235	7123882	7123968	7124298	7125602	3171	1.12263e+21	0,4,1,2,1,0,0,1	75,34,79,111,66	1,0,1,0,5	199	149	0.623313	1	1.0,0.958,0.998,0.981,0.993,1.0,1.0,0.991	0.983,1.0,0.983,1.0,0.908	0.015	SE
376	Choren_v00_mik.OX359201.1G754	NA	chrOX359201.1	-	5579169	5579236	5577225	5577723	5580682	5580808	376	2,148,384,110,91,80,94,85	0,2,2,0,0,0,10,0	60,27,134,135,172	0,0,0,0,8	216	149	0.623473	1	1.0,0.981,0.993,1.0,1.0,1.0,0.866,1.0	1.0,1.0,1.0,1.0,0.937	-0.007	SE
8015	Choren_v00_mik.OX359196.1G892	NA	chrOX359196.1	+	6227555	6227686	6227303	6227482	6227919	6227967	8015	2,213,820,85,178,181,155,191	0,0,0,0,0,0,0,0	91,63,221,168,179	0,0,0,10,0	280	149	0.624409	1	1.0,1.0,1.0,1.0,1.0,1.0,1.0,1.0	1.0,1.0,1.0,0.899,1.0	0.02	SE
6413	Choren_v00_mik.OX359193.1G479	NA	chrOX359193.1	+	2870293	2870484	2859831	2859921	2874765	2874894	6413	2,96,569,93,163,98,213,135	0,4,11,1,0,0,2,0	101,50,281,204,211	0,0,1,7,5	298	149	0.629136	1	1.0,0.923,0.963,0.979,1.0,1.0,0.982,1.0	1.0,1.0,0.993,0.936,0.955	0.004	SE
6088	Choren_v00_mik.OX359201.1G998	NA	chrOX359201.1	-	6807528	6807627	6807371	6807457	6807686	6807816	6088	5,251,374,233,110,123,413,84	0,0,1,1,0,0,0,1	112,57,1392,296,1684	0,0,19,4,5	248	149	0.629352	1	1.0,1.0,0.996,0.993,1.0,1.0,1.0,0.981	1.0,1.0,0.978,0.978,0.995	0.006	SE
3428	Choren_v00_mik.OX359192.1G893	NA	chrOX359192.1	-	6416681	6416783	6416471	6416600	6416861	6417023	3428	1,74,156,51,54,74,152,69	0,1,1,3,0,0,2,0	117,29,74,48,26	1,4,0,2,0	251	149	0.631709	1	1.0,0.978,0.989,0.91,1.0,1.0,0.978,1.0	0.986,0.811,1.0,0.934,1.0	0.036	SE
4515	Choren_v00_mik.OX359191.1G968	NA	chrOX359191.1	-	7779223	7779439	7779077	7779144	7780003	7780096	4515	2,53,253,43,38,109,61,55	0,0,0,0,0,0,0,0	46,38,15,39,70	1,0,0,0,5	298	149	0.635657	1	1.0,1.0,1.0,1.0,1.0,1.0,1.0,1.0	0.958,1.0,1.0,1.0,0.875	0.033	SE
4116	Choren_v00_mik.OX359194.1G950	NA	chrOX359194.1	+	7577033	7577107	7576842	7576870	7577609	7577725	4116	0,34,52,11,12,22,17,19	2,134,687,107,109,26,56,138	17,15,7,39,9	132,29,161,98,160	223	149	0.636982	1	0.0,0.145,0.048,0.064,0.069,0.361,0.169,0.084	0.079,0.257,0.028,0.21,0.036	-0.005	SE
169	Choren_v00_mik.OX359202.1G444	NA	chrOX359202.1	+	2405406	2405466	2404756	2404865	2405677	2405722	169	0,2,0,4,1,3,1,2	3,148,450,39,88,82,76,35	0,0,0,8,2	29,10,151,164,86	209	149	0.639278	1	0.0,0.01,0.0,0.068,0.008,0.025,0.009,0.039	0.0,0.0,0.0,0.034,0.016	0.01	SE
3506	Choren_v00_mik.OX359195.1G837	NA	chrOX359195.1	-	6260476	6260639	6260003	6260120	6261016	6261740	3506	1,91,309,98,77,81,94,82	0,4,9,2,11,5,11,6	77,54,55,63,15	0,2,5,4,9	298	149	0.64277	1	1.0,0.919,0.945,0.961,0.778,0.89,0.81,0.872	1.0,0.931,0.846,0.887,0.455	0.073	SE
7937	Choren_v00_mik.OX359196.1G780	NA	chrOX359196.1	+	5676642	5676752	5676064	5676257	5676831	5677025	7937	4.18542e+21	0,0,0,0,0,0,0,0	96,51,155,205,298	0,0,4,0,5	259	149	0.64571	1	1.0,1.0,1.0,1.0,1.0,1.0,1.0,1.0	1.0,1.0,0.957,1.0,0.972	0.014	SE
885	Choren_v00_mik.OX359199.1G1181	NA	chrOX359199.1	+	7592908	7593076	7592591	7592661	7593132	7593203	885	2,89,290,45,96,85,104,90	0,1,1,6,2,0,0,0	119,18,202,314,144	0,0,5,2,0	298	149	0.648589	1	1.0,0.978,0.993,0.789,0.96,1.0,1.0,1.0	1.0,1.0,0.953,0.987,1.0	-0.023	SE
5110	Choren_v00_mik.OX359189.1G148	NA	chrOX359189.1	+	657571	657671	657158	657313	657729	657788	5110	2,94,373,59,81,90,27,65	0,0,0,1,2,5,3,0	55,47,74,78,22	1,0,0,0,0	249	149	0.649077	1	1.0,1.0,1.0,0.972,0.96,0.915,0.843,1.0	0.971,1.0,1.0,1.0,1.0	-0.033	SE
3756	Choren_v00_mik.OX359193.1G480	NA	chrOX359193.1	+	2923707	2923787	2907987	2908104	2930265	2930451	3756	1,13,74,20,35,20,26,32	0,0,1,0,0,2,0,0	27,5,78,33,89	2,0,0,0,4	229	149	0.650607	1	1.0,1.0,0.98,1.0,1.0,0.867,1.0,1.0	0.898,1.0,1.0,1.0,0.935	0.014	SE
7488	Choren_v00_mik.OX359194.1G984	NA	chrOX359194.1	+	7825183	7825348	7824513	7824597	7826442	7826614	7488	3.42713e+22	0,0,0,0,18,0,0,0	405,152,52,144,98	0,0,7,1,0	298	149	0.653963	1	1.0,1.0,1.0,1.0,0.933,1.0,1.0,1.0	1.0,1.0,0.788,0.986,1.0	0.037	SE
788	Choren_v00_mik.OX359200.1G316	NA	chrOX359200.1	-	1446339	1446429	1445186	1445259	1446493	1446585	788	2,42,165,17,30,25,19,27	0,0,0,0,0,0,6,0	8,9,369,138,304	0,0,0,0,0	239	149	0.654434	1	1.0,1.0,1.0,1.0,1.0,1.0,0.664,1.0	1.0,1.0,1.0,1.0,1.0	-0.042	SE
6445	Choren_v00_mik.OX359193.1G546	NA	chrOX359193.1	+	3808284	3808330	3807421	3807502	3810989	3811060	6445	8.52916e+22	0,0,1,1,0,0,0,0	4.21152e+16	0,0,24,4,0	195	149	0.655343	1	1.0,1.0,0.999,0.998,1.0,1.0,1.0,1.0	1.0,1.0,0.97,0.995,1.0	0.007	SE
1086	Choren_v00_mik.OX359199.1G665	NA	chrOX359199.1	+	5044008	5044059	5043212	5043302	5044135	5044191	1086	5.26895e+21	0,0,2,2,0,0,0,0	174,135,173,202,87	0,4,0,7,0	200	149	0.656245	1	1.0,1.0,0.997,0.993,1.0,1.0,1.0,1.0	1.0,0.962,1.0,0.956,1.0	0.015	SE
2341	Choren_v00_mik.OX359192.1G318	NA	chrOX359192.1	+	1953675	1953797	1952873	1952991	1954266	1954361	2341	1,119,602,125,207,70,202,70	0,4,7,0,1,2,0,2	152,23,195,116,129	0,0,0,0,2	271	149	0.657735	1	1.0,0.942,0.979,1.0,0.991,0.951,1.0,0.951	1.0,1.0,1.0,1.0,0.973	-0.018	SE
2965	Choren_v00_mik.OX359191.1G200	NA	chrOX359191.1	-	1199704	1199783	1198666	1198823	1200213	1200380	2965	2,371,1035,187,438,235,476,83	0,7,0,5,2,1,6,4	156,106,71,118,72	0,0,1,1,0	228	149	0.666157	1	1.0,0.972,1.0,0.961,0.993,0.994,0.981,0.931	1.0,1.0,0.979,0.987,1.0	-0.014	SE
6648	Choren_v00_mik.OX359196.1G1221	NA	chrOX359196.1	+	7900464	7900557	7900082	7900339	7900798	7901027	6648	0,93,78,44,198,193,129,41	3,88,512,56,72,30,52,45	51,38,52,65,18	23,35,108,49,38	242	149	0.671067	1	0.0,0.394,0.086,0.326,0.629,0.798,0.604,0.359	0.577,0.401,0.229,0.45,0.226	0.023	SE
1985	Choren_v00_mik.OX359197.1G196	NA	chrOX359197.1	+	1006915	1007055	1005466	1005711	1008083	1008190	1985	2,50,149,56,12,1,113,23	0,0,0,0,8,0,2,2	102,31,50,26,169	1,0,0,0,6	289	149	0.672601	1	1.0,1.0,1.0,1.0,0.436,1.0,0.967,0.856	0.981,1.0,1.0,1.0,0.936	-0.076	SE
1735	Choren_v00_mik.OX359197.1G890	NA	chrOX359197.1	-	6422992	6423092	6422380	6422488	6423382	6423530	1735	8,190,241,34,268,54,623,395	0,0,2,0,0,0,0,0	165,26,344,56,143	0,0,0,1,8	249	149	0.675437	1	1.0,1.0,0.986,1.0,1.0,1.0,1.0,1.0	1.0,1.0,1.0,0.971,0.915	0.021	SE
996	Choren_v00_mik.OX359199.1G909	NA	chrOX359199.1	+	6391951	6392104	6391503	6391605	6392762	6392864	996	1.67232e+23	0,0,0,0,0,0,0,0	5161778918431040	0,0,0,16,6	298	149	0.675772	1	1.0,1.0,1.0,1.0,1.0,1.0,1.0,1.0	1.0,1.0,1.0,0.963,0.989	0.01	SE
546	Choren_v00_mik.OX359201.1G197	NA	chrOX359201.1	-	976936	976975	976687	976795	977476	977510	546	7.4309e+21	0,123,634,74,179,81,132,119	306,81,180,380,102	95,6,106,148,88	188	149	0.679058	1	1.0,0.735,0.528,0.737,0.611,0.763,0.798,0.639	0.719,0.915,0.574,0.671,0.479	0.055	SE
7749	Choren_v00_mik.OX359196.1G246	NA	chrOX359196.1	-	1478028	1478282	1477722	1477861	1478386	1478470	7749	2,7,83,11,7,12,13,29	0,9,97,24,16,39,29,30	18,6,117,11,101	28,21,249,19,189	298	149	0.679287	1	1.0,0.28,0.3,0.186,0.179,0.133,0.183,0.326	0.243,0.125,0.19,0.224,0.211	0.125	SE
4369	Choren_v00_mik.OX359190.1G18	NA	chrOX359190.1	+	111672	111721	111373	111610	111799	111916	4369	2,70,225,24,31,55,28,27	0,0,0,0,0,0,0,0	29,14,212,165,161	0,0,4,0,6	198	149	0.681802	1	1.0,1.0,1.0,1.0,1.0,1.0,1.0,1.0	1.0,1.0,0.976,1.0,0.953	0.014	SE
5559	Choren_v00_mik.OX359193.1G129	NA	chrOX359193.1	+	518613	518722	518452	518538	518973	519116	5559	1,60,87,87,144,40,80,89	0,0,3,1,5,0,7,4	74,27,39,35,73	5,0,0,2,3	258	149	0.688291	1	1.0,1.0,0.944,0.98,0.943,1.0,0.868,0.928	0.895,1.0,1.0,0.91,0.934	0.01	SE
5685	Choren_v00_mik.OX359191.1G320	NA	chrOX359191.1	+	2019384	2019454	2018799	2018935	2019574	2019631	5685	1.07771e+23	0,6,11,6,4,5,6,1	418228527485198	3,0,11,6,2	219	149	0.688385	1	1.0,0.989,0.987,0.975,0.987,0.985,0.979,0.993	0.99,1.0,0.97,0.982,0.985	0.001	SE
8264	Choren_v00_mik.OX359191.1G901	NA	chrOX359191.1	-	7472193	7472280	7471747	7471816	7472340	7472398	8264	9,232,210,300,41,65,60,206	0,0,0,0,5,0,0,0	205,211,163,223,49	0,0,6,6,0	236	149	0.688726	1	1.0,1.0,1.0,1.0,0.838,1.0,1.0,1.0	1.0,1.0,0.945,0.959,1.0	-0.001	SE
481	Choren_v00_mik.OX359201.1G489	NA	chrOX359201.1	-	3820279	3820432	3819604	3819740	3827436	3828171	481	4.34514e+22	0,6,38,9,2,2,4,1	165129804657908	0,0,3,32,15	298	149	0.691385	1	1.0,0.966,0.949,0.951,0.992,0.989,0.974,0.99	1.0,1.0,0.993,0.911,0.968	0.002	SE
7871	Choren_v00_mik.OX359195.1G990	NA	chrOX359195.1	-	6965687	6965836	6965353	6965459	6966379	6966531	7871	2.24616e+22	0,1,1,1,0,12,0,8	194,10,278,623,131	0,0,6,0,6	298	149	0.692463	1	1.0,0.992,0.999,0.994,1.0,0.956,1.0,0.963	1.0,1.0,0.959,1.0,0.916	0.013	SE
6414	Choren_v00_mik.OX359193.1G479	NA	chrOX359193.1	+	2870792	2870849	2859831	2859921	2874765	2874894	6414	2,51,225,48,72,25,61,34	0,4,11,1,0,0,2,0	61,19,99,105,71	0,0,1,7,5	206	149	0.694529	1	1.0,0.902,0.937,0.972,1.0,1.0,0.957,1.0	1.0,1.0,0.986,0.916,0.911	0.008	SE
19	Choren_v00_mik.OX359202.1G939	NA	chrOX359202.1	+	6423377	6423434	6423203	6423276	6423513	6423651	19	5,43,74,18,59,25,142,80	0,0,0,0,0,0,10,0	63,6,24,28,17	0,0,0,0,0	206	149	0.695399	1	1.0,1.0,1.0,1.0,1.0,1.0,0.911,1.0	1.0,1.0,1.0,1.0,1.0	-0.011	SE
5302	Choren_v00_mik.OX359195.1G1281	NA	chrOX359195.1	-	8428666	8428734	8428474	8428601	8428811	8429019	5302	1,68,409,31,40,56,104,52	0,0,0,0,0,0,0,8	77,30,45,55,10	0,0,0,0,2	217	149	0.697175	1	1.0,1.0,1.0,1.0,1.0,1.0,1.0,0.817	1.0,1.0,1.0,1.0,0.774	0.022	SE
4245	Choren_v00_mik.OX359189.1G251	NA	chrOX359189.1	+	1280071	1280151	1279635	1279794	1280318	1280469	4245	1,113,833,58,121,61,61,127	0,1,15,0,0,0,0,3	64,31,95,21,5	0,0,2,0,0	229	149	0.701433	1	1.0,0.987,0.973,1.0,1.0,1.0,1.0,0.965	1.0,1.0,0.969,1.0,1.0	-0.003	SE
5507	Choren_v00_mik.OX359190.1G245	NA	chrOX359190.1	-	1548810	1548855	1548027	1548083	1549253	1549328	5507	3,244,368,181,99,147,308,179	0,0,0,0,0,0,0,0	102,47,57,129,59	0,0,4,3,0	194	149	0.704079	1	1.0,1.0,1.0,1.0,1.0,1.0,1.0,1.0	1.0,1.0,0.916,0.971,1.0	0.023	SE
78	Choren_v00_mik.OX359202.1G774	NA	chrOX359202.1	-	5509759	5509855	5509604	5509678	5510003	5510201	78	4,70,98,1,15,29,54,69	0,0,5,0,0,0,0,0	22,18,20,32,62	0,1,2,0,3	245	149	0.704809	1	1.0,1.0,0.923,1.0,1.0,1.0,1.0,1.0	1.0,0.916,0.859,1.0,0.926	0.05	SE
8456	Choren_v00_mik.OX359196.1G1086	NA	chrOX359196.1	+	7196906	7196958	7196537	7196595	7199014	7199083	8456	1,33,113,125,17,82,30,86	0,0,0,0,0,0,0,0	18,63,167,412,214	0,0,0,9,3	201	149	0.708064	1	1.0,1.0,1.0,1.0,1.0,1.0,1.0,1.0	1.0,1.0,1.0,0.971,0.981	0.01	SE
2136	Choren_v00_mik.OX359192.1G1388	NA	chrOX359192.1	+	8893261	8893371	8892928	8893008	8893700	8893773	2136	1.05942e+24	0,3,8,4,10,5,16,2	869165638554299	8,2,3,3,2	259	149	0.710825	1	1.0,0.991,0.993,0.992,0.981,0.982,0.975,0.995	0.984,0.979,0.992,0.991,0.989	0.002	SE
3342	Choren_v00_mik.OX359199.1G574	NA	chrOX359199.1	+	4390264	4390380	4389930	4390002	4390659	4390797	3342	4,28,42,26,28,8,21,26	0,0,0,0,0,2,0,0	34,5,167,76,217	0,1,3,2,2	265	149	0.712934	1	1.0,1.0,1.0,1.0,1.0,0.692,1.0,1.0	1.0,0.738,0.969,0.955,0.984	0.032	SE
3197	Choren_v00_mik.OX359190.1G1398	NA	chrOX359190.1	+	9799140	9799278	9798869	9798894	9799611	9799713	3197	3,134,203,60,192,52,51,113	0,2,0,0,0,0,0,0	80,58,1397,668,1239	0,0,19,2,2	287	149	0.714493	1	1.0,0.972,1.0,1.0,1.0,1.0,1.0,1.0	1.0,1.0,0.974,0.994,0.997	0.003	SE
2051	Choren_v00_mik.OX359196.1G1257	NA	chrOX359196.1	+	8051213	8051346	8049281	8049378	8055690	8055991	2051	3,92,216,139,102,73,222,128	0,6,1,4,2,5,9,3	89,31,78,97,20	3,0,6,2,0	282	149	0.715584	1	1.0,0.89,0.991,0.948,0.964,0.885,0.929,0.958	0.94,1.0,0.873,0.962,1.0	-0.009	SE
7990	Choren_v00_mik.OX359193.1G730	NA	chrOX359193.1	+	4779108	4779206	4778709	4778922	4779822	4779922	7990	3.61094e+24	0,4,0,0,0,2,6,1	9.63371e+16	0,0,22,4,1	247	149	0.716153	1	1.0,0.943,1.0,1.0,1.0,0.969,0.995,0.998	1.0,1.0,0.968,0.995,0.998	-0.004	SE
858	Choren_v00_mik.OX359200.1G92	NA	chrOX359200.1	-	320098	320198	319675	319843	320402	320522	858	2,63,178,39,55,30,23,22	0,0,0,0,0,0,0,0	28,22,52,100,8	0,0,6,0,0	249	149	0.716859	1	1.0,1.0,1.0,1.0,1.0,1.0,1.0,1.0	1.0,1.0,0.838,1.0,1.0	0.032	SE
5541	Choren_v00_mik.OX359197.1G911	NA	chrOX359197.1	-	6551968	6552124	6549550	6549724	6555130	6555436	5541	2,60,104,80,59,23,119,59	1,15,93,6,24,29,33,34	79,2,28,46,53	25,2,5,44,28	298	149	0.71712	1	0.5,0.667,0.359,0.87,0.551,0.284,0.643,0.465	0.612,0.333,0.737,0.343,0.486	0.04	SE
1912	Choren_v00_mik.OX359197.1G437	NA	chrOX359197.1	-	2733641	2733756	2733024	2733099	2733975	2735043	1912	2,68,213,107,182,66,192,99	0,2,0,6,0,0,6,0	107,39,457,107,631	0,0,0,0,5	264	149	0.718507	1	1.0,0.95,1.0,0.91,1.0,1.0,0.948,1.0	1.0,1.0,1.0,1.0,0.986	-0.021	SE
916	Choren_v00_mik.OX359199.1G1071	NA	chrOX359199.1	-	7143403	7143537	7143117	7143307	7143683	7143792	916	2.26095e+21	0,17,0,0,0,1,0,0	197114526330526	0,0,2,0,0	283	149	0.719177	1	1.0,0.89,1.0,1.0,1.0,0.994,1.0,1.0	1.0,1.0,0.993,1.0,1.0	-0.013	SE
544	Choren_v00_mik.OX359201.1G197	NA	chrOX359201.1	-	976687	976795	976375	976434	977476	977510	544	1.32412e+22	0,2,16,0,2,0,5,2	267,16,160,316,130	0,0,2,4,2	257	149	0.719363	1	1.0,0.989,0.978,1.0,0.991,1.0,0.979,0.987	1.0,1.0,0.979,0.979,0.974	0.004	SE
5924	Choren_v00_mik.OX359200.1G980	NA	chrOX359200.1	-	6831015	6831114	6829760	6830902	6831248	6831320	5924	9.94234e+23	4.31811e+22	5.44213e+17	110,28,565,631,676	248	149	0.723056	1	0.575,0.64,0.65,0.669,0.687,0.67,0.822,0.679	0.748,0.82,0.618,0.635,0.58	-0.006	SE
2225	Choren_v00_mik.OX359196.1G762	NA	chrOX359196.1	+	5618757	5618832	5618508	5618654	5619036	5619129	2225	2,153,281,2,261,130,194,85	0,1,9,0,6,2,0,2	191,38,291,181,12	13,0,0,0,0	224	149	0.725153	1	1.0,0.99,0.954,1.0,0.967,0.977,1.0,0.966	0.907,1.0,1.0,1.0,1.0	0	SE
1110	Choren_v00_mik.OX359199.1G622	NA	chrOX359199.1	+	4747335	4747434	4746719	4746933	4747655	4747780	1110	6.27565e+21	0,1,15,0,0,3,1,0	142102100191122	0,0,0,0,4	248	149	0.726844	1	1.0,0.994,0.963,1.0,1.0,0.983,0.995,1.0	1.0,1.0,1.0,1.0,0.948	0.002	SE
603	Choren_v00_mik.OX359200.1G1069	NA	chrOX359200.1	-	7316601	7316707	7315900	7315995	7316959	7317027	603	5,77,175,98,42,36,37,80	0,0,25,2,0,0,0,3	80,5,32,35,35	2,0,2,4,4	255	149	0.727478	1	1.0,1.0,0.804,0.966,1.0,1.0,1.0,0.94	0.959,1.0,0.903,0.836,0.836	0.057	SE
938	Choren_v00_mik.OX359199.1G1025	NA	chrOX359199.1	+	6948378	6948424	6948242	6948305	6948589	6948681	938	2.19856e+21	0,0,0,0,0,0,0,0	220,84,166,112,59	1,0,7,1,0	195	149	0.728782	1	1.0,1.0,1.0,1.0,1.0,1.0,1.0,1.0	0.994,1.0,0.948,0.988,1.0	0.014	SE
1317	Choren_v00_mik.OX359199.1G33	NA	chrOX359199.1	+	139700	139722	139559	139638	140154	140268	1317	2.16172e+21	0,12,12,1,1,0,0,7	198,27,95,395,98	1,0,1,6,7	171	149	0.729184	1	1.0,0.921,0.981,0.99,0.993,1.0,1.0,0.957	0.994,1.0,0.988,0.983,0.924	0.002	SE
3140	Choren_v00_mik.OX359195.1G830	NA	chrOX359195.1	-	6233412	6233555	6232659	6232852	6234064	6234656	3140	3.30294e+21	0,2,3,0,0,0,8,0	294,66,711,285,775	5,2,3,0,6	292	149	0.729398	1	1.0,0.987,0.994,1.0,1.0,1.0,0.95,1.0	0.968,0.944,0.992,1.0,0.985	0.014	SE
7124	Choren_v00_mik.OX359199.1G1023	NA	chrOX359199.1	+	6929446	6929510	6928900	6929118	6929574	6929895	7124	1,80,470,106,162,96,240,62	0,3,6,0,2,4,1,1	67,23,73,106,24	2,0,4,1,0	213	149	0.729702	1	1.0,0.949,0.982,1.0,0.983,0.944,0.994,0.977	0.959,1.0,0.927,0.987,1.0	0.004	SE
2892	Choren_v00_mik.OX359193.1G1449	NA	chrOX359193.1	+	8658538	8658739	8657922	8658186	8658814	8659022	2892	4.35962e+21	0,0,2,0,2,0,0,0	252115519390449	0,0,1,4,9	298	149	0.73021	1	1.0,1.0,0.994,1.0,0.984,1.0,1.0,1.0	1.0,1.0,0.996,0.98,0.961	0.01	SE
6187	Choren_v00_mik.OX359193.1G164	NA	chrOX359193.1	-	669133	669241	668201	668272	669487	669571	6187	7.17543e+21	0,0,2,0,0,0,0,0	126,79,450,174,409	0,0,5,0,8	257	149	0.734027	1	1.0,1.0,0.992,1.0,1.0,1.0,1.0,1.0	1.0,1.0,0.981,1.0,0.967	0.009	SE
968	Choren_v00_mik.OX359199.1G995	NA	chrOX359199.1	-	6768491	6768578	6768018	6768097	6769337	6769472	968	6.1697e+21	0,1,17,0,7,1,1,2	2751018715021120	0,0,8,1,25	236	149	0.736754	1	1.0,0.991,0.963,1.0,0.969,0.993,0.996,0.987	1.0,1.0,0.986,0.997,0.966	-0.002	SE
5904	Choren_v00_mik.OX359196.1G1145	NA	chrOX359196.1	+	7497618	7497661	7497250	7497307	7498026	7498096	5904	7.48213e+22	0,0,1,0,1,0,0,0	184,77,201,294,192	1,0,9,2,1	192	149	0.736915	1	1.0,1.0,0.999,1.0,0.997,1.0,1.0,1.0	0.993,1.0,0.945,0.991,0.993	0.015	SE
4767	Choren_v00_mik.OX359191.1G132	NA	chrOX359191.1	+	806394	806580	805802	805963	806731	806887	4767	3,35,119,80,33,15,86,68	0,0,0,0,0,0,8,0	106,4,29,4,14	0,0,0,0,1	298	149	0.739106	1	1.0,1.0,1.0,1.0,1.0,1.0,0.843,1.0	1.0,1.0,1.0,1.0,0.875	0.005	SE
5408	Choren_v00_mik.OX359195.1G1105	NA	chrOX359195.1	+	7629939	7630041	7629557	7629726	7630166	7630229	5408	1,285,1009,104,111,200,56,127	0,0,0,0,2,0,0,0	109,15,133,305,116	0,0,0,8,0	251	149	0.739501	1	1.0,1.0,1.0,1.0,0.971,1.0,1.0,1.0	1.0,1.0,1.0,0.958,1.0	0.005	SE
249	Choren_v00_mik.OX359202.1G90	NA	chrOX359202.1	-	428885	428953	428710	428824	429027	429097	249	2.53133e+28	0,6,8,3,4,4,2,0	4.77165e+16	3,2,15,15,14	217	149	0.74066	1	1.0,0.997,0.999,0.996,0.997,0.994,0.997,1.0	0.991,0.983,0.996,0.971,0.995	0.01	SE
1492	Choren_v00_mik.OX359198.1G642	NA	chrOX359198.1	+	4993563	4993642	4992736	4993043	4994387	4994502	1492	7,94,404,68,18,99,65,72	0,3,12,2,0,2,2,2	85,27,22,48,31	0,0,0,8,0	228	149	0.741115	1	1.0,0.953,0.957,0.957,1.0,0.97,0.955,0.959	1.0,1.0,1.0,0.797,1.0	0.009	SE
2156	Choren_v00_mik.OX359192.1G738	NA	chrOX359192.1	-	5696155	5696248	5695963	5696023	5696478	5696733	2156	2.34842e+26	0,0,0,5,0,1,1,0	1054150753183160	2,0,12,1,4	242	149	0.741453	1	1.0,1.0,1.0,0.993,1.0,0.998,0.999,1.0	0.997,1.0,0.975,0.991,0.962	0.014	SE
27	Choren_v00_mik.OX359202.1G888	NA	chrOX359202.1	+	6264546	6264613	6264130	6264210	6264837	6264983	27	2.20259e+21	0,0,9,0,8,0,0,2	175,62,171,168,116	0,0,0,0,0	216	149	0.748249	1	1.0,1.0,0.978,1.0,0.943,1.0,1.0,0.985	1.0,1.0,1.0,1.0,1.0	-0.012	SE
94	Choren_v00_mik.OX359202.1G716	NA	chrOX359202.1	+	5170418	5170448	5170177	5170274	5170896	5171023	94	1.84526e+23	0,0,3,2,0,0,1,17	713,225,148,123,42	6,0,9,0,0	179	149	0.751311	1	1.0,1.0,0.994,0.998,1.0,1.0,0.997,0.979	0.99,1.0,0.932,1.0,1.0	0.012	SE
7889	Choren_v00_mik.OX359195.1G772	NA	chrOX359195.1	-	5926447	5926645	5925769	5926006	5927046	5927199	7889	1,71,211,53,78,72,65,42	0,6,3,0,2,0,0,0	62,49,78,141,35	0,0,0,2,0	298	149	0.757619	1	1.0,0.855,0.972,1.0,0.951,1.0,1.0,1.0	1.0,1.0,1.0,0.972,1.0	-0.022	SE
46	Choren_v00_mik.OX359202.1G825	NA	chrOX359202.1	+	5860219	5860398	5859686	5859770	5860744	5860841	46	2,43,121,26,65,70,98,59	0,13,52,5,30,16,20,19	33,14,86,283,40	20,7,45,59,3	298	149	0.762758	1	1.0,0.623,0.538,0.722,0.52,0.686,0.71,0.608	0.452,0.5,0.489,0.706,0.87	0.072	SE
5626	Choren_v00_mik.OX359189.1G718	NA	chrOX359189.1	-	4771781	4771881	4766227	4766305	4773595	4773703	5626	3,56,247,64,71,42,57,78	0,4,0,0,0,0,4,2	56,49,76,43,23	0,2,1,4,0	249	149	0.763418	1	1.0,0.893,1.0,1.0,1.0,1.0,0.895,0.959	1.0,0.936,0.978,0.865,1.0	0.013	SE
7697	Choren_v00_mik.OX359196.1G1238	NA	chrOX359196.1	+	7978982	7979034	7978815	7978866	7979097	7979168	7697	1,122,120,66,59,113,101,79	0,10,7,17,8,4,2,4	14,38,135,210,85	1,1,12,5,15	201	149	0.763802	1	1.0,0.9,0.927,0.742,0.845,0.954,0.974,0.936	0.912,0.966,0.893,0.969,0.808	0	SE
2401	Choren_v00_mik.OX359192.1G820	NA	chrOX359192.1	+	6049644	6049878	6049442	6049512	6050171	6050314	2401	7.2548e+21	0,0,10,0,2,0,0,8	301,48,125,230,80	0,0,0,1,0	298	149	0.765082	1	1.0,1.0,0.976,1.0,0.975,1.0,1.0,0.929	1.0,1.0,1.0,0.991,1.0	-0.013	SE
6058	Choren_v00_mik.OX359192.1G1412	NA	chrOX359192.1	-	8943486	8943529	8943260	8943431	8943601	8943867	6058	1,159,452,91,83,113,145,85	0,0,1,2,0,0,0,0	49,51,318,298,241	0,0,5,8,1	192	149	0.767827	1	1.0,1.0,0.997,0.972,1.0,1.0,1.0,1.0	1.0,1.0,0.98,0.967,0.995	0.008	SE
2046	Choren_v00_mik.OX359196.1G1257	NA	chrOX359196.1	+	8050031	8050423	8049281	8049378	8051213	8051346	2046	5,85,305,168,182,57,249,151	0,9,0,0,0,0,0,0	151,38,67,110,26	0,0,0,1,0	298	149	0.769026	1	1.0,0.825,1.0,1.0,1.0,1.0,1.0,1.0	1.0,1.0,1.0,0.982,1.0	-0.018	SE
1809	Choren_v00_mik.OX359197.1G737	NA	chrOX359197.1	-	5637289	5637391	5636789	5636975	5637846	5637893	1809	1.64922e+24	0,6,6,0,5,4,15,6	752,193,233,714,14	0,2,0,5,0	251	149	0.77069	1	1.0,0.98,0.994,1.0,0.984,0.984,0.984,0.985	1.0,0.983,1.0,0.988,1.0	-0.005	SE
3643	Choren_v00_mik.OX359191.1G1245	NA	chrOX359191.1	+	9312710	9312815	9312337	9312649	9312866	9313856	3643	1.32161e+23	0,1,23,4,9,0,0,2	216,76,303,258,294	2,3,4,1,8	254	149	0.775116	1	1.0,0.992,0.969,0.979,0.952,1.0,1.0,0.991	0.984,0.937,0.978,0.993,0.956	0.016	SE
1479	Choren_v00_mik.OX359198.1G682	NA	chrOX359198.1	+	5289376	5289542	5287847	5287996	5290355	5290436	1479	8.39412e+22	0,0,0,0,0,0,0,3	123,127,289,523,70	0,2,2,0,5	298	149	0.777399	1	1.0,1.0,1.0,1.0,1.0,1.0,1.0,0.989	1.0,0.969,0.986,1.0,0.875	0.033	SE
2771	Choren_v00_mik.OX359190.1G1446	NA	chrOX359190.1	-	10093745	10093824	10093242	10093447	10094448	10094735	2771	2.16847e+21	0,0,2,0,0,0,0,0	171,25,62,231,40	0,0,6,0,0	228	149	0.777516	1	1.0,1.0,0.994,1.0,1.0,1.0,1.0,1.0	1.0,1.0,0.871,1.0,1.0	0.025	SE
3520	Choren_v00_mik.OX359189.1G1183	NA	chrOX359189.1	-	7570903	7571146	7569688	7569936	7571327	7571511	3520	3,28,318,26,3,119,48,113	0,0,2,0,0,0,0,0	38,44,196,42,43	0,0,2,4,0	298	149	0.78286	1	1.0,1.0,0.988,1.0,1.0,1.0,1.0,1.0	1.0,1.0,0.98,0.84,1.0	0.034	SE
4670	Choren_v00_mik.OX359189.1G310	NA	chrOX359189.1	+	1583686	1583802	1581343	1581396	1586597	1586742	4670	4.18114e+22	0,2,1,0,1,0,0,0	355,81,341,279,128	0,0,0,10,1	265	149	0.785343	1	1.0,0.981,0.999,1.0,0.995,1.0,1.0,1.0	1.0,1.0,1.0,0.94,0.986	0.012	SE
5427	Choren_v00_mik.OX359190.1G147	NA	chrOX359190.1	-	746202	746258	741087	741156	749071	749163	5427	1,40,244,53,41,60,225,172	0,0,23,0,7,5,3,7	58,30,200,92,14	5,2,6,9,0	205	149	0.785701	1	1.0,1.0,0.885,1.0,0.81,0.897,0.982,0.947	0.894,0.916,0.96,0.881,1.0	0.01	SE
3306	Choren_v00_mik.OX359202.1G742	NA	chrOX359202.1	-	5282329	5282413	5281897	5282032	5283600	5283751	3306	8.12354e+21	0,0,5,0,0,0,0,0	96,41,212,250,133	0,0,3,4,4	233	149	0.787137	1	1.0,1.0,0.986,1.0,1.0,1.0,1.0,1.0	1.0,1.0,0.978,0.976,0.955	0.016	SE
1322	Choren_v00_mik.OX359199.1G30	NA	chrOX359199.1	-	126976	127043	126717	126918	127251	127356	1322	4,295,191,136,90,332,363,193	0,6,4,2,3,2,2,0	231,78,35,34,46	2,0,0,7,0	216	149	0.788228	1	1.0,0.971,0.971,0.979,0.954,0.991,0.992,1.0	0.988,1.0,1.0,0.77,1.0	0.031	SE
2337	Choren_v00_mik.OX359192.1G318	NA	chrOX359192.1	+	1951004	1951133	1950130	1950306	1951346	1951447	2337	1.35414e+22	0,0,24,0,2,2,3,0	228,43,542,293,363	0,0,5,0,12	278	149	0.79087	1	1.0,1.0,0.969,1.0,0.99,0.988,0.969,1.0	1.0,1.0,0.983,1.0,0.942	0.004	SE
3703	Choren_v00_mik.OX359195.1G1197	NA	chrOX359195.1	+	8140632	8140703	8138785	8138928	8142881	8143036	3703	6,201,382,123,151,133,97,116	0,9,95,20,15,14,26,14	61,49,73,116,31	11,2,32,11,0	220	149	0.792358	1	1.0,0.938,0.731,0.806,0.872,0.865,0.716,0.849	0.79,0.943,0.607,0.877,1.0	0.004	SE
3599	Choren_v00_mik.OX359196.1G955	NA	chrOX359196.1	+	6487273	6487335	6487114	6487203	6487445	6488184	3599	1,104,307,66,64,67,126,71	0,10,25,1,3,1,1,3	86,22,29,326,134	7,0,0,7,17	211	149	0.796252	1	1.0,0.88,0.897,0.979,0.938,0.979,0.989,0.944	0.897,1.0,1.0,0.97,0.848	0.008	SE
868	Choren_v00_mik.OX359200.1G36	NA	chrOX359200.1	+	138957	139034	138734	138901	139090	139157	868	2,229,1032,109,205,183,107,93	0,0,0,0,0,2,0,0	114,97,1000,1272,456	2,0,6,15,0	226	149	0.797582	1	1.0,1.0,1.0,1.0,1.0,0.984,1.0,1.0	0.974,1.0,0.991,0.982,1.0	0.009	SE
34	Choren_v00_mik.OX359202.1G877	NA	chrOX359202.1	-	6208442	6208583	6208065	6208136	6208795	6208959	34	1.56541e+23	0,9,1,5,5,1,6,0	423107381421138	7,0,0,0,7	290	149	0.798615	1	1.0,0.974,0.998,0.974,0.974,0.995,0.986,1.0	0.969,1.0,1.0,1.0,0.91	0.012	SE
74	Choren_v00_mik.OX359202.1G781	NA	chrOX359202.1	-	5564084	5564126	5561885	5561954	5566917	5567073	74	1,17,51,11,41,8,13,23	0,11,21,6,0,6,10,6	16,10,7,16,4	1,3,5,6,3	191	149	0.800013	1	1.0,0.547,0.655,0.589,1.0,0.51,0.504,0.749	0.926,0.722,0.522,0.675,0.51	0.023	SE
3496	Choren_v00_mik.OX359201.1G851	NA	chrOX359201.1	-	6155226	6155373	6155035	6155162	6156040	6156123	3496	5.38824e+22	0,0,13,0,0,0,0,0	303,57,861,711,715	1,0,7,2,9	296	149	0.802977	1	1.0,1.0,0.989,1.0,1.0,1.0,1.0,1.0	0.993,1.0,0.984,0.994,0.976	0.009	SE
5825	Choren_v00_mik.OX359192.1G1063	NA	chrOX359192.1	+	7247592	7247673	7247467	7247521	7247772	7248005	5825	2,198,74,159,51,23,161,72	0,0,0,0,6,0,0,4	133,31,78,325,15	0,0,2,0,0	230	149	0.807219	1	1.0,1.0,1.0,1.0,0.846,1.0,1.0,0.921	1.0,1.0,0.962,1.0,1.0	-0.022	SE
1333	Choren_v00_mik.OX359201.1G826	NA	chrOX359201.1	+	6041808	6041922	6041587	6041748	6041990	6042151	1333	3,63,403,135,115,89,72,66	0,2,19,5,4,4,8,3	103,42,257,149,271	2,3,10,7,13	263	149	0.80724	1	1.0,0.947,0.923,0.939,0.942,0.927,0.836,0.926	0.967,0.888,0.936,0.923,0.922	0.003	SE
3492	Choren_v00_mik.OX359201.1G851	NA	chrOX359201.1	-	6152410	6152448	6151778	6151836	6152784	6152925	3492	5.52316e+22	0,2,36,6,8,0,11,7	465190774609660	12,0,16,7,6	187	149	0.810382	1	1.0,0.995,0.972,0.986,0.979,1.0,0.983,0.982	0.969,1.0,0.975,0.986,0.989	0.003	SE
1095	Choren_v00_mik.OX359199.1G656	NA	chrOX359199.1	-	4947984	4948079	4947529	4947644	4948602	4948710	1095	2,132,451,54,12,52,291,35	0,0,0,0,0,0,0,0	24,12,228,72,47	4,0,0,0,0	244	149	0.810756	1	1.0,1.0,1.0,1.0,1.0,1.0,1.0,1.0	0.786,1.0,1.0,1.0,1.0	0.043	SE
1998	Choren_v00_mik.OX359197.1G126	NA	chrOX359197.1	-	595975	596157	595558	595658	596628	596784	1998	6.62216e+22	0,2,2,1,0,0,0,0	245170332469106	1,0,6,4,2	298	149	0.811264	1	1.0,0.994,0.997,0.994,1.0,1.0,1.0,1.0	0.992,1.0,0.965,0.983,0.964	0.017	SE
1602	Choren_v00_mik.OX359198.1G293	NA	chrOX359198.1	-	1711543	1711639	1709620	1709701	1713067	1713298	1602	2.43361e+29	0,0,10,0,0,0,0,30	1.80926e+16	0,0,0,0,0	245	149	0.812373	1	1.0,1.0,0.997,1.0,1.0,1.0,1.0,0.975	1.0,1.0,1.0,1.0,1.0	-0.004	SE
1547	Choren_v00_mik.OX359198.1G417	NA	chrOX359198.1	-	2687796	2688207	2684304	2684854	2699196	2699796	1547	4.70534e+22	0,4,10,0,12,1,0,6	205,95,132,94,81	0,2,0,0,0	298	149	0.814324	1	1.0,0.989,0.994,1.0,0.967,0.995,1.0,0.952	1.0,0.96,1.0,1.0,1.0	-0.005	SE
5335	Choren_v00_mik.OX359202.1G779	NA	chrOX359202.1	-	5544407	5544458	5544010	5544055	5544513	5544543	5335	2.21008e+27	0,14,11,11,10,6,8,6	9.37319e+17	2,0,2,13,3	200	149	0.814897	1	1.0,0.982,0.996,0.986,0.988,0.99,0.993,0.989	0.997,1.0,0.999,0.994,0.999	-0.007	SE
3499	Choren_v00_mik.OX359201.1G851	NA	chrOX359201.1	-	6155630	6155892	6155035	6155162	6156040	6156123	3499	2.3692e+22	0,0,13,0,0,0,0,0	355132868794625	1,0,7,2,9	298	149	0.815094	1	1.0,1.0,0.987,1.0,1.0,1.0,1.0,1.0	0.994,1.0,0.984,0.995,0.972	0.009	SE
3600	Choren_v00_mik.OX359192.1G1034	NA	chrOX359192.1	+	7089202	7089409	7088797	7088946	7089937	7090337	3600	2.14153e+21	0,1,2,0,0,0,6,0	159,59,79,70,29	0,2,0,2,2	298	149	0.817433	1	1.0,0.986,0.993,1.0,1.0,1.0,0.933,1.0	1.0,0.937,1.0,0.946,0.879	0.037	SE
3433	Choren_v00_mik.OX359199.1G324	NA	chrOX359199.1	+	2041316	2041424	2040675	2040744	2041539	2041628	3433	1,18,167,34,49,32,14,17	0,0,7,2,6,3,0,0	13,5,43,68,19	4,0,0,6,0	257	149	0.821868	1	1.0,1.0,0.933,0.908,0.826,0.861,1.0,1.0	0.653,1.0,1.0,0.868,1.0	0.037	SE
3955	Choren_v00_mik.OX359192.1G376	NA	chrOX359192.1	+	2428190	2428256	2426057	2426359	2428868	2429067	3955	1.40186e+21	0,1,0,0,0,0,5,1	2201349231502700	0,0,4,1,15	215	149	0.826985	1	1.0,0.996,1.0,1.0,1.0,1.0,0.991,0.993	1.0,1.0,0.994,0.999,0.97	0.005	SE
6355	Choren_v00_mik.OX359189.1G1194	NA	chrOX359189.1	+	7673552	7673636	7672266	7672458	7674474	7675134	6355	2.19447e+21	0,0,4,0,0,0,1,2	134,67,134,342,100	2,0,0,7,0	233	149	0.827378	1	1.0,1.0,0.987,1.0,1.0,1.0,0.991,0.984	0.977,1.0,1.0,0.969,1.0	0.006	SE
4514	Choren_v00_mik.OX359191.1G968	NA	chrOX359191.1	-	7778308	7778458	7778148	7778226	7778550	7778732	4514	3,45,232,70,54,65,89,50	0,0,0,0,0,0,0,0	73,52,22,50,91	0,0,0,0,5	298	149	0.828761	1	1.0,1.0,1.0,1.0,1.0,1.0,1.0,1.0	1.0,1.0,1.0,1.0,0.901	0.02	SE
2811	Choren_v00_mik.OX359197.1G644	NA	chrOX359197.1	+	5037183	5037263	5036854	5036884	5037664	5037727	2811	2,1,236,139,2,1,153,2	0,0,0,0,0,0,0,0	68,31,2,54,2	2,0,0,0,2	229	149	0.832657	1	1.0,1.0,1.0,1.0,1.0,1.0,1.0,1.0	0.957,1.0,1.0,1.0,0.394	0.13	SE
3079	Choren_v00_mik.OX359191.1G14	NA	chrOX359191.1	-	34089	34142	33796	34031	34204	34268	3079	2,101,570,74,136,94,77,78	0,0,10,3,2,2,2,0	84,20,161,126,174	0,0,6,0,5	202	149	0.833516	1	1.0,1.0,0.977,0.948,0.98,0.972,0.966,1.0	1.0,1.0,0.952,1.0,0.963	-0.003	SE
715	Choren_v00_mik.OX359200.1G541	NA	chrOX359200.1	-	3848151	3848239	3847903	3848044	3848371	3848413	715	1,49,294,54,108,26,51,72	2,0,33,6,11,5,6,2	79,26,985,192,756	7,4,63,22,60	237	149	0.83447	1	0.239,1.0,0.849,0.85,0.861,0.766,0.842,0.958	0.876,0.803,0.908,0.846,0.888	-0.069	SE
611	Choren_v00_mik.OX359200.1G1016	NA	chrOX359200.1	-	7033431	7033474	7032923	7033067	7033539	7033593	611	1,60,138,36,32,51,75,24	0,0,1,0,0,0,0,8	17,26,221,157,173	2,0,5,0,2	192	149	0.835217	1	1.0,1.0,0.991,1.0,1.0,1.0,1.0,0.7	0.868,1.0,0.972,1.0,0.985	-0.004	SE
201	Choren_v00_mik.OX359202.1G322	NA	chrOX359202.1	+	1547026	1547171	1546662	1546746	1548021	1548154	201	5,120,376,82,160,101,240,54	0,0,0,2,1,0,11,0	34,41,61,9,3	0,2,0,0,0	294	149	0.836288	1	1.0,1.0,1.0,0.954,0.988,1.0,0.917,1.0	1.0,0.912,1.0,1.0,1.0	0	SE
5821	Choren_v00_mik.OX359198.1G276	NA	chrOX359198.1	+	1616228	1616350	1615710	1615837	1616659	1616753	5821	2,48,23,23,31,27,13,10	0,16,112,53,28,18,61,18	21,17,4,33,0	89,8,6,2,7	271	149	0.837022	1	1.0,0.623,0.101,0.193,0.378,0.452,0.105,0.234	0.115,0.539,0.268,0.901,0.0	0.021	SE
543	Choren_v00_mik.OX359201.1G197	NA	chrOX359201.1	-	976687	976795	976375	976434	976936	976975	543	7.60413e+22	0,11,35,3,4,12,29,0	458,77,209,502,126	7,2,4,14,4	257	149	0.838188	1	1.0,0.97,0.956,0.983,0.988,0.953,0.946,1.0	0.974,0.957,0.968,0.954,0.948	0.014	SE
1671	Choren_v00_mik.OX359197.1G1133	NA	chrOX359197.1	-	7697825	7697940	7697603	7697771	7698088	7698470	1671	1.24832e+23	0,2,17,1,7,1,0,0	338,65,860,484,1331	0,1,3,1,3	264	149	0.83948	1	1.0,0.993,0.981,0.994,0.977,0.992,1.0,1.0	1.0,0.973,0.994,0.996,0.996	0	SE
2241	Choren_v00_mik.OX359192.1G493	NA	chrOX359192.1	-	3052281	3052385	3052110	3052186	3057230	3057405	2241	6.28561e+21	0,0,2,0,1,0,0,0	134,87,357,427,203	0,0,0,4,6	253	149	0.844743	1	1.0,1.0,0.994,1.0,0.987,1.0,1.0,1.0	1.0,1.0,1.0,0.984,0.952	0.01	SE
7153	Choren_v00_mik.OX359194.1G567	NA	chrOX359194.1	-	5030847	5031087	5030164	5030293	5031616	5031742	7153	5,249,776,100,143,85,136,122	0,2,8,0,1,4,0,0	110,48,1052,456,657	0,0,4,0,0	298	149	0.845011	1	1.0,0.984,0.98,1.0,0.986,0.914,1.0,1.0	1.0,1.0,0.992,1.0,1.0	-0.015	SE
7062	Choren_v00_mik.OX359199.1G216	NA	chrOX359199.1	+	1129324	1129533	1126962	1127152	1130176	1130320	7062	2.15549e+21	0,2,1,0,0,2,0,0	142,60,129,87,43	1,5,0,1,0	298	149	0.845175	1	1.0,0.975,0.996,1.0,1.0,0.974,1.0,1.0	0.986,0.857,1.0,0.978,1.0	0.029	SE
5634	Choren_v00_mik.OX359193.1G575	NA	chrOX359193.1	+	3994206	3994370	3992185	3992374	3994633	3994714	5634	3.17651e+21	0,0,0,0,0,1,3,2	206,58,286,256,186	3,2,4,2,0	298	149	0.84519	1	1.0,1.0,1.0,1.0,1.0,0.989,0.983,0.979	0.972,0.935,0.973,0.985,1.0	0.021	SE
2496	Choren_v00_mik.OX359191.1G1228	NA	chrOX359191.1	+	9228893	9228954	9228633	9228709	9229585	9229889	2496	4.35013e+30	0,17,38,3,7,15,16,10	1.34473e+18	0,0,0,30,0	210	149	0.846762	1	1.0,0.995,0.995,0.997,0.999,0.99,0.99,0.995	1.0,1.0,1.0,0.984,1.0	-0.002	SE
7517	Choren_v00_mik.OX359194.1G1053	NA	chrOX359194.1	-	8263552	8263580	8261980	8262114	8264443	8264590	7517	6.2031e+22	0,2,20,5,15,6,7,7	109,35,132,202,78	0,4,3,6,6	177	149	0.84829	1	1.0,0.988,0.978,0.959,0.938,0.963,0.958,0.938	1.0,0.88,0.974,0.966,0.916	0.018	SE
5206	Choren_v00_mik.OX359190.1G746	NA	chrOX359190.1	-	4872392	4872546	4859981	4860116	4873890	4874037	5206	6.26411e+22	0,0,0,5,1,0,0,1	417150595592425	1,3,0,0,9	298	149	0.848491	1	1.0,1.0,1.0,0.972,0.993,1.0,1.0,0.996	0.995,0.962,1.0,1.0,0.959	0.012	SE
1520	Choren_v00_mik.OX359198.1G539	NA	chrOX359198.1	-	4353093	4353136	4352358	4352458	4353198	4353340	1520	2,205,834,106,253,161,153,66	0,2,18,0,2,0,0,2	103,46,439,388,337	0,2,0,4,4	192	149	0.849355	1	1.0,0.988,0.973,1.0,0.99,1.0,1.0,0.962	1.0,0.947,1.0,0.987,0.985	0.005	SE
1509	Choren_v00_mik.OX359198.1G567	NA	chrOX359198.1	-	4547857	4547998	4547552	4547771	4549731	4549856	1509	9,203,704,67,415,146,177,382	0,1,12,0,4,0,0,0	349,24,130,83,135	0,0,0,0,0	290	149	0.853541	1	1.0,0.991,0.968,1.0,0.982,1.0,1.0,1.0	1.0,1.0,1.0,1.0,1.0	-0.007	SE
721	Choren_v00_mik.OX359202.1G550	NA	chrOX359202.1	+	4060320	4060364	4042191	4042334	4061963	4062121	721	2,37,160,125,92,50,231,93	0,0,0,3,0,0,0,0	180,48,13,81,30	0,2,0,4,0	193	149	0.854004	1	1.0,1.0,1.0,0.97,1.0,1.0,1.0,1.0	1.0,0.949,1.0,0.94,1.0	0.018	SE
1840	Choren_v00_mik.OX359199.1G95	NA	chrOX359199.1	+	471300	471339	471127	471173	471578	471653	1840	2,150,605,44,201,57,130,53	0,0,0,0,0,0,0,0	28,4,244,293,380	0,0,0,12,0	188	149	0.854991	1	1.0,1.0,1.0,1.0,1.0,1.0,1.0,1.0	1.0,1.0,1.0,0.951,1.0	0.01	SE
5474	Choren_v00_mik.OX359192.1G1376	NA	chrOX359192.1	-	8761204	8761289	8761067	8761138	8761361	8761447	5474	5,134,238,98,37,153,232,79	0,1,1,4,0,0,0,6	60,66,97,133,88	0,0,0,1,4	234	149	0.858656	1	1.0,0.988,0.993,0.94,1.0,1.0,1.0,0.893	1.0,1.0,1.0,0.988,0.933	-0.007	SE
5310	Choren_v00_mik.OX359193.1G1105	NA	chrOX359193.1	-	7031089	7031216	7030286	7030373	7031360	7031421	5310	6.31565e+21	0,0,3,0,0,3,0,0	214,79,449,253,661	0,1,4,4,4	276	149	0.861918	1	1.0,1.0,0.992,1.0,1.0,0.962,1.0,1.0	1.0,0.977,0.984,0.972,0.989	0.01	SE
206	Choren_v00_mik.OX359202.1G316	NA	chrOX359202.1	-	1475527	1475608	1475275	1475439	1475861	1475930	206	1,39,47,26,65,15,9,78	0,4,3,7,5,1,0,2	38,7,83,81,4	4,0,4,8,0	230	149	0.86278	1	1.0,0.863,0.91,0.706,0.894,0.907,1.0,0.962	0.86,1.0,0.931,0.868,1.0	-0.027	SE
7939	Choren_v00_mik.OX359195.1G1118	NA	chrOX359195.1	+	7675595	7675842	7674838	7675053	7676002	7676075	7939	1,81,63,27,24,27,26,62	0,3,4,0,3,0,1,0	21,5,9,14,9	0,0,0,2,4	298	149	0.864464	1	1.0,0.931,0.887,1.0,0.8,1.0,0.929,1.0	1.0,1.0,1.0,0.778,0.529	0.082	SE
4885	Choren_v00_mik.OX359195.1G831	NA	chrOX359195.1	+	6239519	6239663	6239320	6239389	6239871	6240048	4885	5.32076e+21	0,6,3,2,6,0,2,1	302,76,373,325,367	0,0,0,1,1	293	149	0.864616	1	1.0,0.964,0.992,0.99,0.954,1.0,0.991,0.993	1.0,1.0,1.0,0.994,0.995	-0.012	SE
2371	Choren_v00_mik.OX359192.1G877	NA	chrOX359192.1	-	6344307	6344443	6344079	6344148	6345095	6345316	2371	1.01034e+22	0,0,5,0,6,0,0,2	84,26,48,73,74	0,0,0,0,0	285	149	0.865642	1	1.0,1.0,0.978,1.0,0.917,1.0,1.0,0.975	1.0,1.0,1.0,1.0,1.0	-0.016	SE
6617	Choren_v00_mik.OX359195.1G826	NA	chrOX359195.1	-	6224467	6224634	6224285	6224384	6224755	6224786	6617	1.87612e+23	0,2,18,0,1,0,2,0	328148594874427	2,0,2,3,9	298	149	0.865805	1	1.0,0.995,0.984,1.0,0.997,1.0,0.985,1.0	0.988,1.0,0.993,0.993,0.96	0.008	SE
2560	Choren_v00_mik.OX359191.1G1134	NA	chrOX359191.1	-	8709871	8709966	8708941	8709186	8711315	8711393	2560	1.77812e+24	0,4,13,0,4,3,2,0	404166248496246	0,0,4,0,6	244	149	0.867058	1	1.0,0.992,0.989,1.0,0.992,0.992,0.997,1.0	1.0,1.0,0.974,1.0,0.962	0.008	SE
1832	Choren_v00_mik.OX359197.1G663	NA	chrOX359197.1	+	5156536	5156623	5153496	5153739	5156997	5157111	1832	1,7,69,52,51,11,37,6	0,0,5,0,0,0,0,0	9,8,38,91,58	0,0,2,0,3	236	149	0.868588	1	1.0,1.0,0.897,1.0,1.0,1.0,1.0,1.0	1.0,1.0,0.923,1.0,0.924	0.018	SE
3148	Choren_v00_mik.OX359198.1G518	NA	chrOX359198.1	-	4214444	4214597	4214020	4214139	4216622	4216755	3148	2.71666e+29	0,7,0,1,0,4,7,0	1049586678647290	0,6,0,0,7	298	149	0.870393	1	1.0,0.992,1.0,0.998,1.0,0.994,0.993,1.0	1.0,0.98,1.0,1.0,0.955	0.01	SE
6729	Choren_v00_mik.OX359190.1G367	NA	chrOX359190.1	+	2462795	2462863	2462237	2462409	2463466	2463666	6729	4.2751e+22	0,0,0,0,4,0,0,1	295,69,194,252,123	0,0,0,10,0	217	149	0.870436	1	1.0,1.0,1.0,1.0,0.988,1.0,1.0,0.992	1.0,1.0,1.0,0.945,1.0	0.008	SE
714	Choren_v00_mik.OX359200.1G541	NA	chrOX359200.1	-	3847903	3848044	3846182	3846257	3848563	3848671	714	3,63,276,102,115,83,156,105	0,1,0,1,0,0,0,0	124,50,968,250,894	0,0,2,0,12	290	149	0.871305	1	1.0,0.97,1.0,0.981,1.0,1.0,1.0,1.0	1.0,1.0,0.996,1.0,0.975	0	SE
698	Choren_v00_mik.OX359200.1G608	NA	chrOX359200.1	+	4439297	4439429	4437499	4437596	4442629	4442718	698	5.6872e+22	0,9,4,10,1,0,0,13	221255459751369	4,4,3,2,5	281	149	0.872329	1	1.0,0.976,0.996,0.964,0.997,1.0,1.0,0.901	0.967,0.971,0.988,0.995,0.975	0	SE
5388	Choren_v00_mik.OX359190.1G1227	NA	chrOX359190.1	+	8891198	8891352	8890699	8890850	8891669	8891753	5388	1.04168e+22	0,1,17,0,0,0,3,0	458,70,93,193,66	0,0,0,0,0	298	149	0.872967	1	1.0,0.995,0.959,1.0,1.0,1.0,0.99,1.0	1.0,1.0,1.0,1.0,1.0	-0.007	SE
2000	Choren_v00_mik.OX359197.1G118	NA	chrOX359197.1	-	565123	565171	564913	565037	568584	568638	2000	3,455,1482,88,270,121,170,189	0,8,32,0,4,1,5,0	207,60,109,361,55	3,2,2,6,5	197	149	0.87316	1	1.0,0.977,0.972,1.0,0.981,0.989,0.963,1.0	0.981,0.958,0.976,0.978,0.893	0.028	SE
3259	Choren_v00_mik.OX359190.1G1190	NA	chrOX359190.1	-	8622040	8622138	8621060	8621325	8622370	8622547	3259	4,139,503,101,243,58,198,165	0,1,9,0,0,0,1,4	194,22,823,191,935	0,0,1,0,0	247	149	0.875122	1	1.0,0.988,0.971,1.0,1.0,1.0,0.992,0.961	1.0,1.0,0.998,1.0,1.0	-0.011	SE
7904	Choren_v00_mik.OX359190.1G974	NA	chrOX359190.1	-	7065771	7065873	7063418	7063489	7067035	7067104	7904	4,113,535,64,92,43,43,32	0,0,4,0,0,0,0,0	9,29,134,110,128	0,0,5,1,0	251	149	0.878592	1	1.0,1.0,0.988,1.0,1.0,1.0,1.0,1.0	1.0,1.0,0.941,0.985,1.0	0.013	SE
859	Choren_v00_mik.OX359200.1G77	NA	chrOX359200.1	+	274372	274413	273936	274031	274475	274652	859	7,187,709,194,216,264,53,111	0,0,15,0,2,3,0,0	144,80,381,560,604	0,0,0,0,8	190	149	0.878655	1	1.0,1.0,0.974,1.0,0.988,0.986,1.0,1.0	1.0,1.0,1.0,1.0,0.983	-0.003	SE
4596	Choren_v00_mik.OX359198.1G623	NA	chrOX359198.1	+	4875877	4875991	4874081	4874137	4876814	4876954	4596	1.02772e+23	3,21,175,56,27,87,74,22	400,90,518,365,235	35,19,28,41,20	263	149	0.879315	1	0.654,0.882,0.881,0.793,0.913,0.79,0.846,0.922	0.866,0.729,0.913,0.835,0.869	-0.007	SE
8048	Choren_v00_mik.OX359196.1G36	NA	chrOX359196.1	-	192461	192613	192104	192248	192795	192874	8048	3.36002e+23	0,5,0,0,4,2,0,4	676,92,607,471,371	8,0,5,0,4	298	149	0.8802	1	1.0,0.984,1.0,1.0,0.988,0.993,1.0,0.988	0.977,1.0,0.984,1.0,0.979	0.006	SE
5450	Choren_v00_mik.OX359190.1G176	NA	chrOX359190.1	-	910895	911016	910620	910766	911253	911310	5450	4,63,448,86,69,52,169,35	0,0,0,4,0,0,6,0	119,26,1159,750,1187	0,0,0,0,0	270	149	0.880807	1	1.0,1.0,1.0,0.922,1.0,1.0,0.94,1.0	1.0,1.0,1.0,1.0,1.0	-0.017	SE
2181	Choren_v00_mik.OX359192.1G676	NA	chrOX359192.1	+	5396979	5397179	5396629	5396788	5397497	5397582	2181	3,163,484,174,138,71,68,129	0,0,0,0,0,0,0,0	114,91,1882,1098,3270	0,6,2,0,14	298	149	0.881099	1	1.0,1.0,1.0,1.0,1.0,1.0,1.0,1.0	1.0,0.883,0.998,1.0,0.992	0.025	SE
3301	Choren_v00_mik.OX359190.1G1353	NA	chrOX359190.1	-	9592714	9592816	9592151	9592274	9593019	9593086	3301	1,88,363,93,91,111,101,71	0,0,9,0,3,0,0,0	96,25,196,310,117	0,0,1,0,3	251	149	0.881399	1	1.0,1.0,0.96,1.0,0.947,1.0,1.0,1.0	1.0,1.0,0.991,1.0,0.959	-0.002	SE
7587	Choren_v00_mik.OX359194.1G1131	NA	chrOX359194.1	-	8594325	8594390	8594033	8594078	8594443	8594463	7587	3,310,459,183,161,238,173,60	0,4,0,2,12,0,0,2	88,24,127,105,86	1,0,0,0,2	214	149	0.885955	1	1.0,0.982,1.0,0.985,0.903,1.0,1.0,0.954	0.984,1.0,1.0,1.0,0.968	-0.012	SE
1944	Choren_v00_mik.OX359197.1G326	NA	chrOX359197.1	+	1880250	1880779	1877959	1877999	1881591	1881688	1944	0,134,953,77,242,137,164,147	1,24,64,6,25,26,28,11	174,45,474,483,474	8,15,55,57,64	298	149	0.887155	1	0.0,0.736,0.882,0.865,0.829,0.725,0.745,0.87	0.916,0.6,0.812,0.809,0.787	-0.078	SE
1606	Choren_v00_mik.OX359198.1G286	NA	chrOX359198.1	-	1652902	1653006	1652623	1652712	1653190	1653232	1606	9.6132e+22	0,0,7,0,3,2,5,1	6021529131282720	2,2,7,3,9	253	149	0.887672	1	1.0,1.0,0.994,1.0,0.994,0.992,0.987,0.997	0.994,0.978,0.987,0.996,0.979	0.009	SE
4491	Choren_v00_mik.OX359196.1G635	NA	chrOX359196.1	+	4989673	4989730	4989498	4989573	4990339	4990523	4491	11,698,1019,167,204,93,40,67	0,0,20,0,0,0,0,0	170,3,326,74,75	0,0,0,1,0	206	149	0.889689	1	1.0,1.0,0.974,1.0,1.0,1.0,1.0,1.0	1.0,1.0,1.0,0.982,1.0	0	SE
3327	Choren_v00_mik.OX359194.1G1147	NA	chrOX359194.1	+	8688756	8688854	8688575	8688703	8688913	8688977	3327	4.41514e+22	0,0,6,1,0,1,8,0	175110242405149	0,6,2,0,2	247	149	0.891204	1	1.0,1.0,0.993,0.995,1.0,0.996,0.973,1.0	1.0,0.917,0.986,1.0,0.978	0.018	SE
886	Choren_v00_mik.OX359199.1G1181	NA	chrOX359199.1	+	7593675	7593782	7593132	7593203	7593851	7593908	886	2,47,221,29,84,76,108,71	0,13,19,8,2,1,5,3	98,22,128,237,136	7,0,11,14,17	256	149	0.8915	1	1.0,0.678,0.871,0.678,0.961,0.978,0.926,0.932	0.891,1.0,0.871,0.908,0.823	-0.021	SE
3720	Choren_v00_mik.OX359192.1G621	NA	chrOX359192.1	-	5049582	5049719	5042956	5043236	5051916	5052030	3720	8.42012e+22	0,0,3,0,0,0,6,0	310,83,173,375,87	0,0,0,9,0	286	149	0.892055	1	1.0,1.0,0.995,1.0,1.0,1.0,0.983,1.0	1.0,1.0,1.0,0.956,1.0	0.006	SE
8261	Choren_v00_mik.OX359191.1G901	NA	chrOX359191.1	-	7470922	7471035	7470729	7470850	7471747	7471816	8261	1.43806e+22	0,0,0,0,0,0,0,0	363261162221126	0,0,5,4,0	262	149	0.893074	1	1.0,1.0,1.0,1.0,1.0,1.0,1.0,1.0	1.0,1.0,0.949,0.969,1.0	0.016	SE
8108	Choren_v00_mik.OX359196.1G183	NA	chrOX359196.1	+	1136731	1137199	1136242	1136377	1137543	1137728	8108	9.10752e+23	0,0,20,0,0,0,0,1	1119,15,97,570,150	0,0,0,10,0	298	149	0.893438	1	1.0,1.0,0.981,1.0,1.0,1.0,1.0,0.993	1.0,1.0,1.0,0.966,1.0	0.004	SE
3725	Choren_v00_mik.OX359199.1G1129	NA	chrOX359199.1	+	7389386	7389427	7389029	7389152	7389712	7389824	3725	1,56,198,89,44,47,62,49	0,6,0,0,0,0,4,0	104,19,55,46,58	1,0,0,0,2	190	149	0.895957	1	1.0,0.88,1.0,1.0,1.0,1.0,0.924,1.0	0.988,1.0,1.0,1.0,0.958	-0.014	SE
6248	Choren_v00_mik.OX359191.1G390	NA	chrOX359191.1	+	2510959	2511016	2510760	2510785	2511089	2511101	6248	1,38,216,44,8,53,44,42	0,9,51,12,14,9,35,19	15,24,24,79,22	8,9,13,10,13	206	149	0.898785	1	1.0,0.753,0.754,0.726,0.292,0.81,0.476,0.615	0.576,0.659,0.572,0.851,0.55	0.037	SE
7284	Choren_v00_mik.OX359194.1G624	NA	chrOX359194.1	-	5349055	5349089	5348375	5348468	5349895	5349966	7284	1,159,590,107,181,137,202,95	0,24,138,35,23,21,37,15	99,35,207,268,148	22,10,32,40,32	183	149	0.900498	1	1.0,0.844,0.777,0.713,0.865,0.842,0.816,0.838	0.786,0.74,0.84,0.845,0.79	0.037	SE
5165	Choren_v00_mik.OX359189.1G1458	NA	chrOX359189.1	-	9192343	9192481	9192115	9192182	9192655	9193997	5165	1,75,707,167,196,139,202,252	0,1,5,5,1,0,2,2	259,27,858,573,1268	1,0,1,10,10	287	149	0.902035	1	1.0,0.975,0.987,0.945,0.99,1.0,0.981,0.985	0.993,1.0,0.998,0.967,0.985	-0.006	SE
8480	Choren_v00_mik.OX359196.1G1150	NA	chrOX359196.1	+	7509434	7509502	7509171	7509255	7510370	7510441	8480	2,74,348,82,68,54,110,71	0,1,10,0,0,1,2,1	99,19,72,117,138	0,0,1,0,0	217	149	0.906095	1	1.0,0.981,0.96,1.0,1.0,0.974,0.974,0.98	1.0,1.0,0.98,1.0,1.0	-0.012	SE
1943	Choren_v00_mik.OX359197.1G326	NA	chrOX359197.1	+	1880247	1880779	1877959	1877999	1881591	1881688	1943	0,154,920,82,247,161,158,151	1,24,64,6,25,26,28,11	176,51,500,482,538	8,15,55,57,64	298	149	0.914668	1	0.0,0.762,0.878,0.872,0.832,0.756,0.738,0.873	0.917,0.63,0.82,0.809,0.808	-0.083	SE
1772	Choren_v00_mik.OX359197.1G814	NA	chrOX359197.1	-	6042343	6042514	6042132	6042279	6042986	6043189	1772	2,128,511,153,185,92,224,159	0,0,2,0,0,4,0,1	179,66,1546,800,2055	0,0,2,0,19	298	149	0.917374	1	1.0,1.0,0.992,1.0,1.0,0.92,1.0,0.988	1.0,1.0,0.997,1.0,0.982	-0.008	SE
8444	Choren_v00_mik.OX359192.1G1233	NA	chrOX359192.1	-	8036636	8036787	8036511	8036574	8037204	8037371	8444	1.29195e+21	0,0,8,0,4,0,0,0	147127362456198	0,0,9,1,0	298	149	0.919288	1	1.0,1.0,0.983,1.0,0.96,1.0,1.0,1.0	1.0,1.0,0.953,0.996,1.0	0.003	SE
4140	Choren_v00_mik.OX359190.1G615	NA	chrOX359190.1	-	4039313	4039370	4036043	4036113	4039427	4039571	4140	0,7,29,4,37,9,57,18	9.12783e+25	54,9,19,8,6	9.5037e+17	206	149	0.919708	1	0.0,0.004,0.007,0.004,0.021,0.01,0.021,0.025	0.039,0.017,0.009,0.002,0.003	-0.003	SE
4007	Choren_v00_mik.OX359191.1G559	NA	chrOX359191.1	+	5118936	5119128	5118130	5118203	5128958	5129076	4007	2,123,362,56,101,57,47,77	0,0,0,0,0,0,0,0	45,17,1007,503,832	0,0,6,1,9	298	149	0.923198	1	1.0,1.0,1.0,1.0,1.0,1.0,1.0,1.0	1.0,1.0,0.988,0.996,0.979	0.007	SE
3310	Choren_v00_mik.OX359197.1G1109	NA	chrOX359197.1	+	7629716	7629767	7629529	7629660	7629865	7629992	3310	2.43877e+21	0,17,60,1,0,5,23,0	141,34,490,441,436	0,2,27,11,23	200	149	0.925619	1	1.0,0.95,0.905,0.995,1.0,0.972,0.872,1.0	1.0,0.927,0.931,0.968,0.934	0.01	SE
828	Choren_v00_mik.OX359200.1G163	NA	chrOX359200.1	-	665658	665708	664999	665171	665820	665897	828	2,118,353,106,101,105,137,68	0,0,0,0,0,0,0,0	19,29,135,82,168	0,0,0,8,0	199	149	0.936826	1	1.0,1.0,1.0,1.0,1.0,1.0,1.0,1.0	1.0,1.0,1.0,0.885,1.0	0.023	SE
2447	Choren_v00_mik.OX359198.1G906	NA	chrOX359198.1	-	6858915	6859073	6858202	6858478	6859134	6859456	2447	12,221,665,185,237,212,238,95	0,4,6,0,2,0,4,0	196,44,101,165,32	6,0,0,0,0	298	149	0.937038	1	1.0,0.965,0.982,1.0,0.983,1.0,0.967,1.0	0.942,1.0,1.0,1.0,1.0	-0.001	SE
4987	Choren_v00_mik.OX359194.1G183	NA	chrOX359194.1	+	1582306	1582401	1581868	1582090	1582859	1582928	4987	2.26566e+21	0,0,0,0,14,0,0,0	140,55,245,141,191	0,0,0,0,0	244	149	0.939123	1	1.0,1.0,1.0,1.0,0.925,1.0,1.0,1.0	1.0,1.0,1.0,1.0,1.0	-0.009	SE
6139	Choren_v00_mik.OX359193.1G127	NA	chrOX359193.1	-	495863	495956	495657	495799	496063	496109	6139	9.2641e+22	0,0,0,0,14,0,0,0	241,93,637,832,386	0,0,0,0,0	242	149	0.940061	1	1.0,1.0,1.0,1.0,0.922,1.0,1.0,1.0	1.0,1.0,1.0,1.0,1.0	-0.01	SE
5687	Choren_v00_mik.OX359192.1G328	NA	chrOX359192.1	-	2021413	2021596	2020339	2020528	2022030	2022213	5687	6,69,922,183,143,61,99,61	0,95,190,50,237,80,211,163	76,61,98,41,51	74,11,78,79,69	298	149	0.944524	1	1.0,0.266,0.708,0.647,0.232,0.276,0.19,0.158	0.339,0.735,0.386,0.206,0.27	0.047	SE
4184	Choren_v00_mik.OX359190.1G1157	NA	chrOX359190.1	-	8371789	8371857	8371230	8371430	8372121	8372308	4184	0,6,0,2,16,6,6,6	8,52,22,181,0,132,68,187	16,2,0,0,3	251,18,30,5,0	217	149	0.947813	1	0.0,0.073,0.0,0.008,1.0,0.03,0.057,0.022	0.042,0.071,0.0,0.0,1.0	-0.074	SE
3901	Choren_v00_mik.OX359189.1G716	NA	chrOX359189.1	+	4821551	4821625	4818639	4819768	4826382	4826457	3901	7,94,1015,218,606,108,386,375	0,2,6,0,1,0,1,0	176,76,244,83,191	0,0,0,5,4	223	149	0.950868	1	1.0,0.969,0.991,1.0,0.998,1.0,0.996,1.0	1.0,1.0,1.0,0.917,0.97	0.017	SE
3443	Choren_v00_mik.OX359196.1G30	NA	chrOX359196.1	+	200944	201040	200853	200885	201651	201778	3443	9.84521e+22	0,1,3,0,15,6,1,0	556321339593364	0,0,6,2,0	245	149	0.959396	1	1.0,0.998,0.998,1.0,0.973,0.977,0.998,1.0	1.0,1.0,0.972,0.994,1.0	0	SE
2511	Choren_v00_mik.OX359199.1G70	NA	chrOX359199.1	+	347379	347541	346910	347012	347655	347727	2511	4.30537e+21	0,0,2,36,0,0,0,0	294,171,46,23,44	0,13,0,0,0	298	149	0.960209	1	1.0,1.0,0.989,0.809,1.0,1.0,1.0,1.0	1.0,0.868,1.0,1.0,1.0	0.001	SE
1157	Choren_v00_mik.OX359199.1G566	NA	chrOX359199.1	-	4312740	4312834	4312346	4312452	4313408	4313540	1157	1.18942e+21	0,15,5,8,7,9,18,6	222,77,198,210,169	2,10,5,11,8	243	149	0.961681	1	1.0,0.885,0.981,0.945,0.955,0.929,0.923,0.926	0.986,0.825,0.96,0.921,0.928	0.019	SE
7577	Choren_v00_mik.OX359191.1G1256	NA	chrOX359191.1	-	9331409	9331548	9331146	9331351	9331697	9331806	7577	5,91,280,252,213,114,352,81	0,0,6,3,0,0,1,0	102174394167181	0,1,0,0,10	288	149	0.964373	1	1.0,1.0,0.96,0.978,1.0,1.0,0.995,1.0	1.0,0.989,1.0,1.0,0.904	0.013	SE
6472	Choren_v00_mik.OX359197.1G67	NA	chrOX359197.1	-	312661	312727	312262	312394	313186	313247	6472	0,253,461,101,199,178,299,58	4,28,155,28,76,30,23,8	116,81,118,230,119	32,11,36,34,42	215	149	0.977224	1	0.0,0.862,0.673,0.714,0.645,0.804,0.9,0.834	0.715,0.836,0.694,0.824,0.663	-0.067	SE
1444	Choren_v00_mik.OX359198.1G757	NA	chrOX359198.1	-	5806826	5806926	5806119	5806424	5807539	5807632	1444	0,16,86,10,39,35,21,24	1,246,732,90,169,177,332,47	1,11,25,24,75	68,26,248,163,432	249	149	0.989578	1	0.0,0.037,0.066,0.062,0.121,0.106,0.036,0.234	0.009,0.202,0.057,0.081,0.094	-0.006	SE
0	Choren_v00_mik.OX359202.1G1012	NA	chrOX359202.1	-	6739187	6739288	6738819	6739134	6739356	6739483	0	1.17252e+23	0,0,0,0,0,0,0,0	6012529141090650	0,0,1,0,0	250	149	1	1	1.0,1.0,1.0,1.0,1.0,1.0,1.0,1.0	1.0,1.0,0.998,1.0,1.0	0	SE
1	Choren_v00_mik.OX359202.1G1003	NA	chrOX359202.1	+	6722284	6722428	6722153	6722222	6722487	6722579	1	0,74,138,63,62,76,83,58	0,0,0,2,0,0,0,0	79,16,51,129,11	0,0,0,0,0	293	149	1	1	NA,1.0,1.0,0.941,1.0,1.0,1.0,1.0	1.0,1.0,1.0,1.0,1.0	-0.008	SE
2	Choren_v00_mik.OX359202.1G1001	NA	chrOX359202.1	-	6690108	6690172	6689942	6690046	6690226	6690318	2	1.04211e+23	0,0,0,0,0,0,0,0	240127539489739	2,0,0,0,0	213	149	1	1	1.0,1.0,1.0,1.0,1.0,1.0,1.0,1.0	0.988,1.0,1.0,1.0,1.0	0.002	SE
3	Choren_v00_mik.OX359202.1G993	NA	chrOX359202.1	+	6675608	6675648	6675306	6675493	6675756	6675811	3	0,77,663,2,217,9,21,20	0,0,1,0,0,0,0,0	99,2,11,32,6	0,0,0,0,2	189	149	1	1	NA,1.0,0.998,1.0,1.0,1.0,1.0,1.0	1.0,1.0,1.0,1.0,0.703	0.059	SE
4	Choren_v00_mik.OX359202.1G995	NA	chrOX359202.1	-	6666591	6666763	6666300	6666499	6666992	6667300	4	0,10,271,7,30,30,30,18	0,0,2,0,0,0,0,0	8,7,58,200,23	0,0,0,0,0	298	149	1	1	NA,1.0,0.985,1.0,1.0,1.0,1.0,1.0	1.0,1.0,1.0,1.0,1.0	-0.002	SE
5	Choren_v00_mik.OX359202.1G992	NA	chrOX359202.1	+	6653433	6653482	6653262	6653366	6653548	6653578	5	0,40,97,31,30,18,61,53	0,0,0,0,0,0,0,0	1,11,12,41,10	2,0,0,0,0	198	149	1	1	NA,1.0,1.0,1.0,1.0,1.0,1.0,1.0	0.273,1.0,1.0,1.0,1.0	0.145	SE
6	Choren_v00_mik.OX359202.1G994	NA	chrOX359202.1	-	6646170	6646201	6646083	6646112	6646256	6646339	6	7,61,405,221,173,107,147,194	0,0,0,0,0,0,0,0	171,58,122,1,136	0,2,0,0,0	180	149	1	1	1.0,1.0,1.0,1.0,1.0,1.0,1.0,1.0	1.0,0.96,1.0,1.0,1.0	0.008	SE
7	Choren_v00_mik.OX359202.1G991	NA	chrOX359202.1	-	6636538	6636567	6636410	6636475	6636630	6636752	7	4,74,54,63,34,32,54,51	0,0,0,0,0,0,0,0	16,13,51,57,116	0,0,2,0,3	178	149	1	1	1.0,1.0,1.0,1.0,1.0,1.0,1.0,1.0	1.0,1.0,0.955,1.0,0.97	0.015	SE
8	Choren_v00_mik.OX359202.1G979	NA	chrOX359202.1	+	6624333	6624455	6624084	6624274	6624520	6625268	8	6.16477e+21	0,0,0,0,4,0,0,2	348,33,128,176,61	0,0,0,0,0	271	149	1	1	1.0,1.0,1.0,1.0,0.971,1.0,1.0,0.987	1.0,1.0,1.0,1.0,1.0	-0.005	SE
9	Choren_v00_mik.OX359202.1G985	NA	chrOX359202.1	-	6594625	6594734	6594425	6594568	6594794	6594884	9	1.18932e+23	0,0,0,0,0,0,0,0	5174177691432240	0,0,1,0,0	258	149	1	1	1.0,1.0,1.0,1.0,1.0,1.0,1.0,1.0	1.0,1.0,0.998,1.0,1.0	0	SE
10	Choren_v00_mik.OX359202.1G985	NA	chrOX359202.1	-	6594944	6594997	6594794	6594884	6595051	6595130	10	9.71722e+22	0,0,0,0,0,1,2,0	4733409621963430	0,0,0,1,0	202	149	1	1	1.0,1.0,1.0,1.0,1.0,0.998,0.995,1.0	1.0,1.0,1.0,0.999,1.0	-0.001	SE
11	Choren_v00_mik.OX359202.1G973	NA	chrOX359202.1	+	6562728	6562803	6562566	6562669	6563010	6563204	11	0,14,65,18,19,31,34,20	0,0,4,0,0,0,0,0	17,8,115,81,146	0,0,2,0,3	224	149	1	1	NA,1.0,0.915,1.0,1.0,1.0,1.0,1.0	1.0,1.0,0.975,1.0,0.97	-0.001	SE
12	Choren_v00_mik.OX359202.1G973	NA	chrOX359202.1	+	6563010	6563204	6562566	6562669	6563257	6563448	12	0,4,56,8,17,35,10,10	0,0,1,0,0,0,0,0	3,16,126,79,147	0,0,0,0,0	298	149	1	1	NA,1.0,0.966,1.0,1.0,1.0,1.0,1.0	1.0,1.0,1.0,1.0,1.0	-0.005	SE
15	Choren_v00_mik.OX359202.1G967	NA	chrOX359202.1	+	6545188	6545336	6544888	6545097	6546365	6546503	15	1,50,332,136,65,79,68,196	0,0,0,0,1,0,0,0	176,23,76,84,48	0,0,0,0,0	297	149	1	1	1.0,1.0,1.0,1.0,0.97,1.0,1.0,1.0	1.0,1.0,1.0,1.0,1.0	-0.004	SE
17	Choren_v00_mik.OX359202.1G956	NA	chrOX359202.1	+	6517384	6517541	6517115	6517273	6517596	6517788	17	0,96,525,59,92,109,64,80	0,0,0,0,0,0,0,0	94,58,164,385,90	0,0,1,1,0	298	149	1	1	NA,1.0,1.0,1.0,1.0,1.0,1.0,1.0	1.0,1.0,0.988,0.995,1.0	0.003	SE
18	Choren_v00_mik.OX359202.1G947	NA	chrOX359202.1	+	6467265	6467436	6465888	6466781	6467503	6467634	18	3,47,378,40,59,46,19,72	0,0,0,0,0,1,0,0	55,11,43,126,26	0,0,0,2,0	298	149	1	1	1.0,1.0,1.0,1.0,1.0,0.958,1.0,1.0	1.0,1.0,1.0,0.969,1.0	0.001	SE
20	Choren_v00_mik.OX359202.1G931	NA	chrOX359202.1	-	6385235	6385290	6384677	6385087	6385351	6385400	20	2.11844e+28	0,2,0,14,0,0,3,0	1.21259e+16	8,0,0,0,0	204	149	1	1	1.0,0.999,1.0,0.99,1.0,1.0,0.998,1.0	0.991,1.0,1.0,1.0,1.0	0	SE
21	Choren_v00_mik.OX359202.1G930	NA	chrOX359202.1	-	6384368	6384419	6384129	6384295	6384470	6384581	21	1.25463e+21	0,4,0,0,0,0,0,0	157,97,158,136,74	0,0,6,0,0	200	149	1	1	1.0,0.979,1.0,1.0,1.0,1.0,1.0,1.0	1.0,1.0,0.951,1.0,1.0	0.007	SE
22	Choren_v00_mik.OX359202.1G919	NA	chrOX359202.1	+	6370626	6370696	6370284	6370331	6370800	6370847	22	1,0,9,18,448,3,29,122	0,0,0,0,6,0,0,0	2,0,8,44,82	0,0,0,0,0	219	149	1	1	1.0,NA,1.0,1.0,0.981,1.0,1.0,1.0	1.0,NA,1.0,1.0,1.0	-0.003	SE
23	Choren_v00_mik.OX359202.1G919	NA	chrOX359202.1	+	6373679	6373951	6373382	6373490	6374023	6374088	23	1.42411e+23	0,0,1,0,0,0,0,0	403,57,142,289,157	0,0,0,0,0	298	149	1	1	1.0,1.0,0.999,1.0,1.0,1.0,1.0,1.0	1.0,1.0,1.0,1.0,1.0	0	SE
25	Choren_v00_mik.OX359202.1G899	NA	chrOX359202.1	+	6298187	6298265	6297875	6298016	6298519	6298634	25	4.28741e+28	0,0,12,0,2,0,0,0	461132370651354	0,0,1,0,0	227	149	1	1	1.0,1.0,0.998,1.0,0.999,1.0,1.0,1.0	1.0,1.0,0.996,1.0,1.0	0	SE
26	Choren_v00_mik.OX359202.1G899	NA	chrOX359202.1	+	6298871	6299005	6298519	6298634	6299254	6299349	26	3.18565e+24	0,5,1,0,1,1,0,0	596110154484184	2,0,4,1,0	283	149	1	1	1.0,0.995,1.0,1.0,0.998,0.998,1.0,1.0	0.994,1.0,0.953,0.996,1.0	0.01	SE
29	Choren_v00_mik.OX359202.1G893	NA	chrOX359202.1	-	6251312	6251593	6250945	6251105	6251762	6251765	29	3.04103e+35	0,0,0,0,0,0,0,0	1.25183e+22	0,0,0,0,2	298	149	1	1	1.0,1.0,1.0,1.0,1.0,1.0,1.0,1.0	1.0,1.0,1.0,1.0,0.999	0	SE
30	Choren_v00_mik.OX359202.1G883	NA	chrOX359202.1	-	6226297	6226319	6223599	6225154	6226504	6226626	30	0,277,585,345,246,213,515,230	0,0,3,0,0,0,0,0	268,49,325,386,310	0,0,0,0,0	171	149	1	1	NA,1.0,0.994,1.0,1.0,1.0,1.0,1.0	1.0,1.0,1.0,1.0,1.0	-0.001	SE
31	Choren_v00_mik.OX359202.1G877	NA	chrOX359202.1	-	6207734	6207824	6207400	6207661	6208065	6208136	31	1.75981e+24	0,0,5,0,2,0,0,0	581100314302196	0,0,0,0,0	239	149	1	1	1.0,1.0,0.992,1.0,0.991,1.0,1.0,1.0	1.0,1.0,1.0,1.0,1.0	-0.002	SE
32	Choren_v00_mik.OX359202.1G877	NA	chrOX359202.1	-	6207734	6207978	6207400	6207661	6208065	6208136	32	6.23939e+21	0,0,5,0,2,0,0,0	304,47,126,173,83	0,0,0,0,0	298	149	1	1	1.0,1.0,0.975,1.0,0.97,1.0,1.0,1.0	1.0,1.0,1.0,1.0,1.0	-0.007	SE
33	Choren_v00_mik.OX359202.1G877	NA	chrOX359202.1	-	6208065	6208136	6207734	6207824	6208795	6208959	33	5.22131e+21	0,0,0,0,0,0,0,0	210,23,109,81,64	2,0,0,0,0	220	149	1	1	1.0,1.0,1.0,1.0,1.0,1.0,1.0,1.0	0.986,1.0,1.0,1.0,1.0	0.003	SE
35	Choren_v00_mik.OX359202.1G846	NA	chrOX359202.1	+	6059954	6060068	6059445	6059534	6060191	6060387	35	0,18,238,166,21,315,166,46	0,0,0,0,0,0,0,0	148,54,215,171,196	1,0,0,0,0	263	149	1	1	NA,1.0,1.0,1.0,1.0,1.0,1.0,1.0	0.988,1.0,1.0,1.0,1.0	0.002	SE
36	Choren_v00_mik.OX359202.1G846	NA	chrOX359202.1	+	6060675	6060787	6060191	6060387	6061079	6061266	36	3.29469e+21	0,0,1,2,0,0,5,0	163,87,354,280,208	0,0,0,0,0	261	149	1	1	1.0,1.0,0.997,0.992,1.0,1.0,0.985,1.0	1.0,1.0,1.0,1.0,1.0	-0.003	SE
37	Choren_v00_mik.OX359202.1G856	NA	chrOX359202.1	-	6045997	6046077	6045678	6045813	6046380	6046533	37	1,82,293,84,77,36,54,45	0,0,0,0,0,0,0,0	68,35,1131,586,1360	0,0,1,0,0	229	149	1	1	1.0,1.0,1.0,1.0,1.0,1.0,1.0,1.0	1.0,1.0,0.999,1.0,1.0	0	SE
38	Choren_v00_mik.OX359202.1G843	NA	chrOX359202.1	+	6043540	6043579	6043419	6043464	6043850	6043931	38	1,2,5,48,40,57,127,37	0,0,0,0,0,0,0,1	57,8,10,26,7	0,0,0,0,0	188	149	1	1	1.0,1.0,1.0,1.0,1.0,1.0,1.0,0.967	1.0,1.0,1.0,1.0,1.0	-0.004	SE
39	Choren_v00_mik.OX359202.1G837	NA	chrOX359202.1	+	5994988	5995104	5994658	5994750	5995226	5995269	39	0,100,483,90,162,89,123,148	0,0,1,0,0,0,0,0	122,30,325,328,350	0,0,0,0,0	265	149	1	1	NA,1.0,0.996,1.0,1.0,1.0,1.0,1.0	1.0,1.0,1.0,1.0,1.0	-0.001	SE
40	Choren_v00_mik.OX359202.1G837	NA	chrOX359202.1	+	5995226	5995269	5994988	5995104	5996231	5996319	40	0,83,419,69,120,80,101,151	0,0,0,0,0,0,0,0	117,27,295,275,268	0,0,0,2,0	192	149	1	1	NA,1.0,1.0,1.0,1.0,1.0,1.0,1.0	1.0,1.0,1.0,0.991,1.0	0.002	SE
41	Choren_v00_mik.OX359202.1G837	NA	chrOX359202.1	+	5996231	5996319	5995226	5995269	5999184	5999242	41	0,113,487,118,117,113,189,189	0,0,2,0,0,0,0,0	148,36,321,312,308	0,0,0,1,2	237	149	1	1	NA,1.0,0.994,1.0,1.0,1.0,1.0,1.0	1.0,1.0,1.0,0.995,0.99	0.002	SE
42	Choren_v00_mik.OX359202.1G837	NA	chrOX359202.1	+	5996231	5996319	5995226	5995269	5999541	5999769	42	0,32,194,35,50,34,56,74	0,0,0,0,0,0,0,0	55,13,137,108,125	0,0,0,1,0	237	149	1	1	NA,1.0,1.0,1.0,1.0,1.0,1.0,1.0	1.0,1.0,1.0,0.985,1.0	0.003	SE
43	Choren_v00_mik.OX359202.1G837	NA	chrOX359202.1	+	5999184	5999242	5995226	5995269	5999541	5999769	43	0,93,274,139,96,129,227,188	0,0,0,0,0,0,0,0	165,56,177,208,190	0,0,0,1,0	207	149	1	1	NA,1.0,1.0,1.0,1.0,1.0,1.0,1.0	1.0,1.0,1.0,0.993,1.0	0.001	SE
44	Choren_v00_mik.OX359202.1G837	NA	chrOX359202.1	+	5999184	5999242	5996231	5996319	5999541	5999769	44	0,172,568,224,163,209,361,303	0,0,0,0,0,0,0,0	260,79,361,414,373	0,0,0,1,0	207	149	1	1	NA,1.0,1.0,1.0,1.0,1.0,1.0,1.0	1.0,1.0,1.0,0.997,1.0	0.001	SE
45	Choren_v00_mik.OX359202.1G825	NA	chrOX359202.1	+	5856065	5856133	5855879	5855952	5856343	5856444	45	0,35,116,68,43,96,71,45	0,0,0,0,0,0,1,0	35,20,134,230,25	0,0,0,0,0	217	149	1	1	NA,1.0,1.0,1.0,1.0,1.0,0.98,1.0	1.0,1.0,1.0,1.0,1.0	-0.003	SE
47	Choren_v00_mik.OX359202.1G825	NA	chrOX359202.1	+	5867880	5867971	5867534	5867820	5868027	5868173	47	0,19,73,9,20,38,14,25	0,0,0,0,0,0,0,0	26,6,20,26,4	0,0,1,0,0	240	149	1	1	NA,1.0,1.0,1.0,1.0,1.0,1.0,1.0	1.0,1.0,0.925,1.0,1.0	0.015	SE
48	Choren_v00_mik.OX359202.1G825	NA	chrOX359202.1	+	5868815	5868918	5868585	5868746	5869260	5869339	48	2,54,55,22,18,37,30,22	0,2,1,2,0,0,0,2	26,9,18,45,4	0,0,0,0,0	252	149	1	1	1.0,0.941,0.97,0.867,1.0,1.0,1.0,0.867	1.0,1.0,1.0,1.0,1.0	-0.044	SE
49	Choren_v00_mik.OX359202.1G822	NA	chrOX359202.1	+	5841862	5841983	5841405	5841574	5842226	5842308	49	3,106,207,45,79,64,91,26	0,0,2,1,0,0,3,2	69,10,44,84,53	0,0,2,0,0	270	149	1	1	1.0,1.0,0.983,0.961,1.0,1.0,0.944,0.878	1.0,1.0,0.924,1.0,1.0	-0.014	SE
50	Choren_v00_mik.OX359202.1G822	NA	chrOX359202.1	+	5843775	5843912	5843276	5843458	5843979	5844046	50	2.28899e+21	0,0,0,0,0,0,0,0	247,99,274,320,69	0,0,2,0,0	286	149	1	1	1.0,1.0,1.0,1.0,1.0,1.0,1.0,1.0	1.0,1.0,0.986,1.0,1.0	0.003	SE
51	Choren_v00_mik.OX359202.1G821	NA	chrOX359202.1	-	5811162	5811207	5810873	5810954	5811765	5811813	51	0,10,73,10,14,9,16,31	0,0,0,0,0,0,0,0	9,2,10,12,26	0,0,0,0,1	194	149	1	1	NA,1.0,1.0,1.0,1.0,1.0,1.0,1.0	1.0,1.0,1.0,1.0,0.952	0.01	SE
53	Choren_v00_mik.OX359202.1G821	NA	chrOX359202.1	-	5811765	5811813	5811337	5811388	5811987	5812047	53	2,140,287,73,80,98,139,65	0,0,3,0,0,0,0,2	92,29,127,130,124	0,0,0,0,0	197	149	1	1	1.0,1.0,0.986,1.0,1.0,1.0,1.0,0.961	1.0,1.0,1.0,1.0,1.0	-0.007	SE
54	Choren_v00_mik.OX359202.1G821	NA	chrOX359202.1	-	5816768	5816891	5815395	5815468	5818216	5818308	54	2.12436e+21	0,0,2,0,1,2,6,0	85,32,203,138,316	1,0,0,0,0	272	149	1	1	1.0,1.0,0.99,1.0,0.985,0.97,0.93,1.0	0.979,1.0,1.0,1.0,1.0	-0.011	SE
55	Choren_v00_mik.OX359202.1G796	NA	chrOX359202.1	+	5673019	5673136	5672523	5672627	5673379	5673446	55	0,365,852,335,268,196,467,354	0,0,0,0,0,0,4,0	275,59,129,197,80	0,0,0,0,0	266	149	1	1	NA,1.0,1.0,1.0,1.0,1.0,0.985,1.0	1.0,1.0,1.0,1.0,1.0	-0.002	SE
56	Choren_v00_mik.OX359202.1G796	NA	chrOX359202.1	+	5674351	5674451	5673734	5673796	5674802	5675066	56	0,278,369,316,238,219,515,367	0,0,0,0,2,0,0,0	352,61,153,126,60	0,0,0,0,0	249	149	1	1	NA,1.0,1.0,1.0,0.986,1.0,1.0,1.0	1.0,1.0,1.0,1.0,1.0	-0.002	SE
57	Choren_v00_mik.OX359202.1G798	NA	chrOX359202.1	-	5656801	5656905	5656408	5656498	5657061	5657199	57	0,88,227,71,40,90,193,80	0,2,0,0,0,0,0,0	132,37,496,1034,250	0,0,0,0,0	253	149	1	1	NA,0.963,1.0,1.0,1.0,1.0,1.0,1.0	1.0,1.0,1.0,1.0,1.0	-0.005	SE
58	Choren_v00_mik.OX359202.1G798	NA	chrOX359202.1	-	5659533	5659614	5659034	5659162	5659757	5659850	58	0,27,93,34,19,20,47,36	0,0,0,0,0,1,0,0	61,18,311,594,154	0,0,0,4,0	230	149	1	1	NA,1.0,1.0,1.0,1.0,0.928,1.0,1.0	1.0,1.0,1.0,0.99,1.0	-0.008	SE
59	Choren_v00_mik.OX359202.1G798	NA	chrOX359202.1	-	5662420	5662512	5661565	5662047	5662828	5662909	59	0,9,16,11,4,13,5,4	0,0,0,0,0,0,0,0	5,7,69,225,37	0,0,0,1,0	241	149	1	1	NA,1.0,1.0,1.0,1.0,1.0,1.0,1.0	1.0,1.0,1.0,0.993,1.0	0.001	SE
60	Choren_v00_mik.OX359202.1G791	NA	chrOX359202.1	+	5627635	5627711	5627069	5627252	5628348	5628478	60	0,10,55,6,17,29,8,11	0,0,0,0,2,7,0,0	26,51,535,898,754	0,4,203,9,3	225	149	1	1	NA,1.0,1.0,1.0,0.849,0.733,1.0,1.0	1.0,0.894,0.636,0.985,0.994	0.038	SE
61	Choren_v00_mik.OX359202.1G789	NA	chrOX359202.1	-	5613351	5613429	5612304	5612562	5614064	5614142	61	4.18954e+21	0,0,2,0,0,0,0,0	177,61,240,50,76	0,0,0,0,0	227	149	1	1	1.0,1.0,0.994,1.0,1.0,1.0,1.0,1.0	1.0,1.0,1.0,1.0,1.0	-0.001	SE
62	Choren_v00_mik.OX359202.1G789	NA	chrOX359202.1	-	5615704	5615801	5615123	5615166	5616104	5616170	62	7,154,257,118,242,87,149,105	0,0,6,0,0,0,0,0	133,49,62,51,31	0,0,1,0,3	246	149	1	1	1.0,1.0,0.963,1.0,1.0,1.0,1.0,1.0	1.0,1.0,0.974,1.0,0.862	0.028	SE
63	Choren_v00_mik.OX359202.1G789	NA	chrOX359202.1	-	5618056	5618133	5616104	5616170	5618560	5618625	63	5.13531e+21	0,0,0,0,0,1,0,0	135,51,164,69,87	0,0,0,0,0	226	149	1	1	1.0,1.0,1.0,1.0,1.0,0.988,1.0,1.0	1.0,1.0,1.0,1.0,1.0	-0.002	SE
64	Choren_v00_mik.OX359202.1G789	NA	chrOX359202.1	-	5618560	5618625	5618056	5618133	5618689	5618759	64	3.11329e+21	0,0,0,0,0,7,0,2	123,57,206,77,101	2,0,0,0,0	214	149	1	1	1.0,1.0,1.0,1.0,1.0,0.921,1.0,0.975	0.977,1.0,1.0,1.0,1.0	-0.008	SE
65	Choren_v00_mik.OX359202.1G788	NA	chrOX359202.1	-	5603833	5603998	5602963	5603050	5604443	5604588	65	2,95,243,15,166,86,28,85	0,0,0,0,0,0,0,0	98,43,99,71,11	0,0,2,0,0	298	149	1	1	1.0,1.0,1.0,1.0,1.0,1.0,1.0,1.0	1.0,1.0,0.961,1.0,1.0	0.008	SE
66	Choren_v00_mik.OX359202.1G788	NA	chrOX359202.1	-	5606973	5607089	5605834	5605945	5607923	5608142	66	0,51,352,27,37,65,33,91	0,0,0,0,2,0,0,0	28,8,35,63,18	0,0,0,0,0	265	149	1	1	NA,1.0,1.0,1.0,0.912,1.0,1.0,1.0	1.0,1.0,1.0,1.0,1.0	-0.013	SE
67	Choren_v00_mik.OX359202.1G777	NA	chrOX359202.1	+	5567987	5568081	5567458	5567917	5568249	5568393	67	1.43641e+28	0,11,13,0,0,1,2,3	1.51955e+18	0,0,5,2,7	243	149	1	1	1.0,0.995,0.996,1.0,1.0,0.999,0.998,0.998	1.0,1.0,0.995,0.999,0.994	0.001	SE
68	Choren_v00_mik.OX359202.1G781	NA	chrOX359202.1	-	5561885	5561954	5561191	5561315	5566917	5567073	68	1,65,159,61,49,40,63,51	0,0,0,0,0,0,0,0	56,16,27,58,11	0,0,0,0,2	218	149	1	1	1.0,1.0,1.0,1.0,1.0,1.0,1.0,1.0	1.0,1.0,1.0,1.0,0.79	0.042	SE
69	Choren_v00_mik.OX359202.1G781	NA	chrOX359202.1	-	5562907	5562964	5561885	5561954	5563409	5563516	69	1,137,343,95,192,70,142,138	0,0,0,0,0,1,0,0	132,36,72,123,56	0,0,0,0,0	206	149	1	1	1.0,1.0,1.0,1.0,1.0,0.981,1.0,1.0	1.0,1.0,1.0,1.0,1.0	-0.002	SE
71	Choren_v00_mik.OX359202.1G781	NA	chrOX359202.1	-	5563409	5563516	5561885	5561954	5564084	5564126	71	0,87,186,39,62,3,49,57	0,0,0,0,0,0,0,0	62,18,26,66,19	0,1,0,0,0	256	149	1	1	NA,1.0,1.0,1.0,1.0,1.0,1.0,1.0	1.0,0.913,1.0,1.0,1.0	0.017	SE
72	Choren_v00_mik.OX359202.1G781	NA	chrOX359202.1	-	5563409	5563516	5561885	5561954	5566917	5567073	72	0,0,1,0,0,1,0,0	0,11,21,6,0,6,10,6	0,0,12,0,1	1,3,5,6,3	256	149	1	1	NA,0.0,0.027,0.0,NA,0.088,0.0,0.0	0.0,0.0,0.583,0.0,0.162	-0.13	SE
73	Choren_v00_mik.OX359202.1G781	NA	chrOX359202.1	-	5563409	5563516	5562907	5562964	5566917	5567073	73	0,69,181,45,114,41,81,78	0,8,10,5,6,2,9,4	63,23,47,64,29	1,4,6,1,1	256	149	1	1	NA,0.834,0.913,0.84,0.917,0.923,0.84,0.919	0.973,0.77,0.82,0.974,0.944	-0.012	SE
76	Choren_v00_mik.OX359202.1G780	NA	chrOX359202.1	-	5560285	5560362	5555914	5555972	5560764	5560773	76	5.27038e+21	0,0,0,0,0,0,0,2	197,84,180,185,58	0,0,0,0,0	226	149	1	1	1.0,1.0,1.0,1.0,1.0,1.0,1.0,0.987	1.0,1.0,1.0,1.0,1.0	-0.002	SE
77	Choren_v00_mik.OX359202.1G774	NA	chrOX359202.1	-	5506228	5506325	5506016	5506099	5506806	5506937	77	6,115,110,121,24,42,107,122	0,2,6,0,0,0,0,0	130,38,23,127,70	3,0,0,0,0	246	149	1	1	1.0,0.972,0.917,1.0,1.0,1.0,1.0,1.0	0.963,1.0,1.0,1.0,1.0	-0.006	SE
79	Choren_v00_mik.OX359202.1G749	NA	chrOX359202.1	-	5347462	5347640	5346971	5347068	5348292	5348427	79	5.43614e+22	0,1,0,4,0,2,4,0	2.87112e+17	1,1,0,10,0	298	149	1	1	1.0,0.995,1.0,0.978,1.0,0.99,0.984,1.0	0.993,0.982,1.0,0.986,1.0	0.001	SE
80	Choren_v00_mik.OX359202.1G749	NA	chrOX359202.1	-	5351786	5351864	5351592	5351693	5352158	5352262	80	1,145,404,53,180,71,98,140	0,0,2,0,0,0,0,0	63,20,327,444,271	0,0,0,0,0	227	149	1	1	1.0,1.0,0.993,1.0,1.0,1.0,1.0,1.0	1.0,1.0,1.0,1.0,1.0	-0.001	SE
81	Choren_v00_mik.OX359202.1G749	NA	chrOX359202.1	-	5355120	5355198	5354666	5354721	5355313	5355355	81	0,88,573,78,117,107,43,55	0,0,0,0,0,0,0,0	51,38,260,339,337	0,0,1,0,0	227	149	1	1	NA,1.0,1.0,1.0,1.0,1.0,1.0,1.0	1.0,1.0,0.994,1.0,1.0	0.001	SE
82	Choren_v00_mik.OX359202.1G743	NA	chrOX359202.1	-	5297174	5297291	5296734	5296847	5297816	5297942	82	2,45,100,9,7,24,15,31	0,1,0,0,0,0,0,0	4,8,326,144,296	0,0,0,0,0	266	149	1	1	1.0,0.962,1.0,1.0,1.0,1.0,1.0,1.0	1.0,1.0,1.0,1.0,1.0	-0.005	SE
83	Choren_v00_mik.OX359202.1G743	NA	chrOX359202.1	-	5303208	5303319	5302873	5303146	5303525	5303669	83	0,19,45,5,11,23,6,20	0,0,0,0,0,0,0,0	11,17,183,144,505	0,0,0,0,3	260	149	1	1	NA,1.0,1.0,1.0,1.0,1.0,1.0,1.0	1.0,1.0,1.0,1.0,0.99	0.002	SE
84	Choren_v00_mik.OX359202.1G743	NA	chrOX359202.1	-	5303773	5303890	5303525	5303669	5303959	5304145	84	0,30,54,6,13,14,2,7	0,0,0,0,0,0,0,0	15,9,208,132,478	0,0,0,0,2	266	149	1	1	NA,1.0,1.0,1.0,1.0,1.0,1.0,1.0	1.0,1.0,1.0,1.0,0.993	0.001	SE
85	Choren_v00_mik.OX359202.1G743	NA	chrOX359202.1	-	5307135	5307211	5306236	5306320	5308319	5308361	85	0,21,67,6,13,19,7,9	0,0,0,0,0,0,0,0	5,1,246,69,375	0,0,0,0,5	225	149	1	1	NA,1.0,1.0,1.0,1.0,1.0,1.0,1.0	1.0,1.0,1.0,1.0,0.98	0.004	SE
86	Choren_v00_mik.OX359202.1G743	NA	chrOX359202.1	-	5308850	5308888	5308319	5308361	5309163	5309259	86	0,17,48,8,15,12,6,8	0,0,0,0,0,0,0,0	4,9,259,75,289	0,0,0,1,0	187	149	1	1	NA,1.0,1.0,1.0,1.0,1.0,1.0,1.0	1.0,1.0,1.0,0.984,1.0	0.003	SE
87	Choren_v00_mik.OX359202.1G741	NA	chrOX359202.1	-	5270822	5270982	5270067	5270301	5271061	5271093	87	5.21811e+22	0,0,0,1,0,2,0,0	352,80,1523,616,1086	0,0,0,1,1	298	149	1	1	1.0,1.0,1.0,0.992,1.0,0.985,1.0,1.0	1.0,1.0,1.0,0.997,0.998	-0.002	SE
88	Choren_v00_mik.OX359202.1G731	NA	chrOX359202.1	-	5243163	5243203	5240916	5241003	5243271	5243342	88	0,8,0,7,11,2,8,0	0,4,0,16,25,31,40,0	0,9,0,2,2	0,11,6,24,7	189	149	1	1	NA,0.612,NA,0.256,0.258,0.048,0.136,NA	NA,0.392,0.0,0.062,0.184	0.103	SE
89	Choren_v00_mik.OX359202.1G730	NA	chrOX359202.1	-	5231066	5231128	5230906	5231000	5231570	5231641	89	3.25341e+21	0,0,7,0,0,2,1,0	156,58,278,377,79	0,0,0,0,0	211	149	1	1	1.0,1.0,0.976,1.0,1.0,0.986,0.995,1.0	1.0,1.0,1.0,1.0,1.0	-0.005	SE
90	Choren_v00_mik.OX359202.1G730	NA	chrOX359202.1	-	5231570	5231641	5231066	5231128	5232868	5232931	90	1,119,141,55,66,76,106,75	0,2,0,0,0,0,0,0	82,16,100,141,22	0,0,0,0,0	220	149	1	1	1.0,0.976,1.0,1.0,1.0,1.0,1.0,1.0	1.0,1.0,1.0,1.0,1.0	-0.003	SE
91	Choren_v00_mik.OX359202.1G730	NA	chrOX359202.1	-	5232253	5232350	5231570	5231641	5232868	5232931	91	8.30964e+21	0,7,9,0,0,2,2,0	85133406560126	2,0,0,0,0	246	149	1	1	1.0,0.964,0.977,1.0,1.0,0.99,0.993,1.0	0.963,1.0,1.0,1.0,1.0	-0.002	SE
92	Choren_v00_mik.OX359202.1G719	NA	chrOX359202.1	-	5177462	5177533	5176836	5176984	5177841	5178012	92	4.22454e+21	0,0,2,0,0,0,0,0	148,47,941,321,1207	0,0,0,0,0	220	149	1	1	1.0,1.0,0.995,1.0,1.0,1.0,1.0,1.0	1.0,1.0,1.0,1.0,1.0	-0.001	SE
93	Choren_v00_mik.OX359202.1G719	NA	chrOX359202.1	-	5178319	5178425	5177841	5178012	5178567	5178773	93	8.27581e+21	0,0,1,0,0,0,0,0	192,74,1405,414,1484	0,0,0,0,0	255	149	1	1	1.0,1.0,0.998,1.0,1.0,1.0,1.0,1.0	1.0,1.0,1.0,1.0,1.0	0	SE
95	Choren_v00_mik.OX359202.1G714	NA	chrOX359202.1	+	5166181	5166299	5165288	5165358	5167459	5167643	95	2.02003e+28	0,13,0,4,2,4,10,12	9116326682191340	4,0,6,0,3	267	149	1	1	1.0,0.989,1.0,0.996,0.997,0.991,0.991,0.987	0.992,1.0,0.984,1.0,0.984	0.002	SE
96	Choren_v00_mik.OX359202.1G711	NA	chrOX359202.1	-	5115033	5115166	5113771	5114074	5115916	5116010	96	0,69,235,68,46,32,36,61	0,0,0,0,0,0,0,0	47,19,36,73,3	0,0,1,0,0	282	149	1	1	NA,1.0,1.0,1.0,1.0,1.0,1.0,1.0	1.0,1.0,0.95,1.0,1.0	0.01	SE
97	Choren_v00_mik.OX359202.1G710	NA	chrOX359202.1	-	5095484	5095568	5095049	5095135	5096393	5096471	97	1.03626e+22	0,0,0,0,0,0,0,2	229112410544871	0,0,0,0,0	233	149	1	1	1.0,1.0,1.0,1.0,1.0,1.0,1.0,0.987	1.0,1.0,1.0,1.0,1.0	-0.002	SE
98	Choren_v00_mik.OX359202.1G710	NA	chrOX359202.1	-	5097337	5097425	5097042	5097093	5098085	5098187	98	7.54913e+22	0,6,0,2,0,0,0,2	3.09135e+16	1,0,0,4,1	237	149	1	1	1.0,0.983,1.0,0.984,1.0,1.0,1.0,0.988	0.995,1.0,1.0,0.994,0.999	-0.003	SE
99	Choren_v00_mik.OX359202.1G709	NA	chrOX359202.1	-	5090119	5090147	5089927	5090029	5090253	5090278	99	0,0,0,2,0,6,0,0	1,28,0,31,0,17,1,0	0,0,0,0,0	0,0,0,0,94	177	149	1	1	0.0,0.0,NA,0.052,NA,0.229,0.0,NA	NA,NA,NA,NA,0.0	0.056	SE
100	Choren_v00_mik.OX359202.1G685	NA	chrOX359202.1	-	5000554	5000638	4999556	4999787	5000810	5000852	100	2,24,134,70,139,10,101,22	0,0,0,0,0,0,0,0	54,31,377,562,61	0,0,0,0,2	233	149	1	1	1.0,1.0,1.0,1.0,1.0,1.0,1.0,1.0	1.0,1.0,1.0,1.0,0.951	0.01	SE
101	Choren_v00_mik.OX359202.1G685	NA	chrOX359202.1	-	5000702	5000741	5000554	5000638	5000810	5000852	101	0,15,138,34,210,9,18,3	0,2,0,0,0,1,0,0	65,20,583,569,470	0,0,0,0,2	188	149	1	1	NA,0.856,1.0,1.0,1.0,0.877,1.0,1.0	1.0,1.0,1.0,1.0,0.995	-0.037	SE
102	Choren_v00_mik.OX359202.1G681	NA	chrOX359202.1	+	4992396	4992470	4992221	4992323	4993848	4993921	102	9.50211e+22	0,0,1,0,6,0,0,0	320,113,566,1120,56	0,0,4,2,0	223	149	1	1	1.0,1.0,0.999,1.0,0.978,1.0,1.0,1.0	1.0,1.0,0.99,0.997,1.0	0	SE
103	Choren_v00_mik.OX359202.1G681	NA	chrOX359202.1	+	4992396	4992470	4992221	4992323	4994772	4994838	103	3,149,152,140,99,95,74,52	0,0,1,0,0,0,0,0	52,39,160,258,6	0,0,0,0,0	223	149	1	1	1.0,1.0,0.99,1.0,1.0,1.0,1.0,1.0	1.0,1.0,1.0,1.0,1.0	-0.001	SE
104	Choren_v00_mik.OX359202.1G681	NA	chrOX359202.1	+	4993848	4993921	4992221	4992323	4994772	4994838	104	8.17266e+21	0,0,1,0,0,0,0,0	189,42,327,415,193	0,0,0,0,0	222	149	1	1	1.0,1.0,0.998,1.0,1.0,1.0,1.0,1.0	1.0,1.0,1.0,1.0,1.0	0	SE
105	Choren_v00_mik.OX359202.1G681	NA	chrOX359202.1	+	4993848	4993921	4992396	4992470	4994772	4994838	105	1.45252e+23	0,0,0,0,0,0,0,0	4541177421275240	0,0,4,0,3	222	149	1	1	1.0,1.0,1.0,1.0,1.0,1.0,1.0,1.0	1.0,1.0,0.992,1.0,0.982	0.005	SE
106	Choren_v00_mik.OX359202.1G675	NA	chrOX359202.1	+	4975774	4975822	4975626	4975707	4976073	4976152	106	1.11931e+23	0,0,0,0,2,0,0,0	139115322364192	0,0,0,0,0	197	149	1	1	1.0,1.0,1.0,1.0,0.992,1.0,1.0,1.0	1.0,1.0,1.0,1.0,1.0	-0.001	SE
107	Choren_v00_mik.OX359202.1G675	NA	chrOX359202.1	+	4976073	4976152	4975774	4975822	4976355	4976458	107	1.22501e+23	0,0,4,0,0,0,0,0	209115305345204	0,0,0,0,0	228	149	1	1	1.0,1.0,0.995,1.0,1.0,1.0,1.0,1.0	1.0,1.0,1.0,1.0,1.0	-0.001	SE
109	Choren_v00_mik.OX359202.1G665	NA	chrOX359202.1	-	4895578	4895677	4894739	4894869	4896871	4896908	109	5.56584e+21	0,0,0,0,0,0,0,0	525,28,234,218,165	0,0,2,0,0	248	149	1	1	1.0,1.0,1.0,1.0,1.0,1.0,1.0,1.0	1.0,1.0,0.986,1.0,1.0	0.003	SE
111	Choren_v00_mik.OX359202.1G646	NA	chrOX359202.1	-	4772731	4772787	4771450	4771535	4774105	4774350	111	8.53911e+22	0,0,4,0,3,0,0,2	390239105118889	0,0,0,0,3	205	149	1	1	1.0,1.0,0.995,1.0,0.992,1.0,1.0,0.988	1.0,1.0,1.0,1.0,0.995	-0.002	SE
112	Choren_v00_mik.OX359202.1G644	NA	chrOX359202.1	-	4761020	4761145	4760798	4760873	4761529	4761700	112	0,189,517,101,196,93,91,94	0,2,4,0,0,0,0,0	63,28,100,148,32	0,0,0,0,0	274	149	1	1	NA,0.981,0.986,1.0,1.0,1.0,1.0,1.0	1.0,1.0,1.0,1.0,1.0	-0.005	SE
113	Choren_v00_mik.OX359202.1G637	NA	chrOX359202.1	-	4634106	4634154	4633546	4633999	4634273	4634327	113	0,20,89,20,33,18,68,1	0,4,0,0,0,0,0,0	27,25,37,16,23	0,0,0,0,0	197	149	1	1	NA,0.791,1.0,1.0,1.0,1.0,1.0,1.0	1.0,1.0,1.0,1.0,1.0	-0.03	SE
114	Choren_v00_mik.OX359202.1G637	NA	chrOX359202.1	-	4666298	4666325	4660103	4660163	4667274	4667410	114	0,0,0,0,76,2,0,0	0,0,0,0,4,1,0,0	0,19,0,75,31	0,0,0,9,8	176	149	1	1	NA,NA,NA,NA,0.941,0.629,NA,NA	NA,1.0,NA,0.876,0.766	-0.096	SE
115	Choren_v00_mik.OX359202.1G637	NA	chrOX359202.1	-	4674796	4674868	4674580	4674718	4676349	4676388	115	0,0,162,0,35,0,0,0	0,0,0,0,5,0,0,0	0,2,0,19,9	0,6,0,12,2	221	149	1	1	NA,NA,1.0,NA,0.825,NA,NA,NA	NA,0.183,NA,0.516,0.752	0.429	SE
116	Choren_v00_mik.OX359202.1G630	NA	chrOX359202.1	-	4594923	4594985	4591103	4591229	4598223	4598362	116	0,25,47,7,16,16,1,10	0,0,1,0,0,2,6,0	2,0,19,65,5	1,0,0,0,0	211	149	1	1	NA,1.0,0.971,1.0,1.0,0.85,0.105,1.0	0.585,NA,1.0,1.0,1.0	-0.05	SE
118	Choren_v00_mik.OX359202.1G621	NA	chrOX359202.1	-	4526650	4526715	4525966	4526198	4526782	4526899	118	0,167,123,144,158,209,80,130	0,3,0,2,4,5,0,2	79,39,30,39,23	3,0,0,0,0	214	149	1	1	NA,0.975,1.0,0.98,0.965,0.967,1.0,0.978	0.948,1.0,1.0,1.0,1.0	-0.009	SE
119	Choren_v00_mik.OX359202.1G621	NA	chrOX359202.1	-	4532708	4532953	4529383	4529560	4533638	4533733	119	0,5,0,13,3,32,28,18	0,0,0,0,1,0,0,0	8,7,2,19,0	0,0,0,0,0	298	149	1	1	NA,1.0,NA,1.0,0.6,1.0,1.0,1.0	1.0,1.0,1.0,1.0,NA	-0.067	SE
120	Choren_v00_mik.OX359202.1G621	NA	chrOX359202.1	-	4532708	4532953	4529383	4529560	4533854	4535997	120	0,4,0,9,0,23,13,15	0,0,0,0,1,0,0,0	7,3,2,9,0	0,0,0,0,0	298	149	1	1	NA,1.0,NA,1.0,0.0,1.0,1.0,1.0	1.0,1.0,1.0,1.0,NA	-0.167	SE
121	Choren_v00_mik.OX359202.1G621	NA	chrOX359202.1	-	4533156	4533733	4532708	4532953	4533854	4536159	121	0,5,0,2,0,2,2,10	0,0,0,0,0,0,2,0	3,1,0,9,0	0,0,0,0,0	298	149	1	1	NA,1.0,NA,1.0,NA,1.0,0.333,1.0	1.0,1.0,NA,1.0,NA	-0.133	SE
122	Choren_v00_mik.OX359202.1G621	NA	chrOX359202.1	-	4533638	4533733	4529383	4529560	4533854	4535997	122	0,5,0,2,1,2,2,8	0,0,0,0,1,0,0,0	2,0,0,7,0	0,0,0,0,0	244	149	1	1	NA,1.0,NA,1.0,0.379,1.0,1.0,1.0	1.0,NA,NA,1.0,NA	-0.104	SE
123	Choren_v00_mik.OX359202.1G621	NA	chrOX359202.1	-	4533638	4533733	4532708	4532953	4533854	4535997	123	0,6,0,6,3,11,19,11	0,0,0,0,0,0,2,0	3,4,0,17,0	0,0,0,0,0	244	149	1	1	NA,1.0,NA,1.0,1.0,1.0,0.853,1.0	1.0,1.0,NA,1.0,NA	-0.025	SE
125	Choren_v00_mik.OX359202.1G621	NA	chrOX359202.1	-	4533854	4536159	4529383	4529560	4536258	4536349	125	0,2,6,1,4,2,0,0	0,0,1,0,0,0,0,0	0,0,1,22,10	0,0,0,0,0	298	149	1	1	NA,1.0,0.75,1.0,1.0,1.0,NA,NA	NA,NA,1.0,1.0,1.0	-0.05	SE
126	Choren_v00_mik.OX359202.1G621	NA	chrOX359202.1	-	4535946	4535997	4529383	4529560	4536089	4536159	126	0,9,48,5,9,19,6,8	0,4,20,2,17,3,0,0	1,6,7,5,0	0,0,5,5,6	200	149	1	1	NA,0.626,0.641,0.651,0.283,0.825,1.0,1.0	1.0,1.0,0.511,0.427,0.0	0.13	SE
127	Choren_v00_mik.OX359202.1G621	NA	chrOX359202.1	-	4536089	4536159	4529383	4529560	4536258	4536349	127	0,6,24,2,19,5,0,0	0,0,1,0,0,0,0,0	0,0,2,16,15	0,0,0,0,0	219	149	1	1	NA,1.0,0.942,1.0,1.0,1.0,NA,NA	NA,NA,1.0,1.0,1.0	-0.012	SE
128	Choren_v00_mik.OX359202.1G614	NA	chrOX359202.1	+	4492931	4493049	4492476	4492808	4493506	4493595	128	5.84053e+29	0,0,2,0,0,0,0,0	2.99962e+18	0,0,0,0,0	267	149	1	1	1.0,1.0,1.0,1.0,1.0,1.0,1.0,1.0	1.0,1.0,1.0,1.0,1.0	0	SE
129	Choren_v00_mik.OX359202.1G614	NA	chrOX359202.1	+	4493154	4493365	4492931	4493049	4493506	4493595	129	2.01961e+32	0,0,3,0,0,0,0,0	7.26614e+19	0,0,0,0,0	298	149	1	1	1.0,1.0,1.0,1.0,1.0,1.0,1.0,1.0	1.0,1.0,1.0,1.0,1.0	0	SE
130	Choren_v00_mik.OX359202.1G614	NA	chrOX359202.1	+	4493506	4493595	4492931	4493049	4493762	4494011	130	7.02991e+29	0,0,0,0,0,0,0,0	2.55625e+16	0,0,0,2,0	238	149	1	1	1.0,1.0,1.0,1.0,1.0,1.0,1.0,1.0	1.0,1.0,1.0,0.996,1.0	0.001	SE
131	Choren_v00_mik.OX359202.1G613	NA	chrOX359202.1	-	4470120	4470154	4469806	4469872	4470257	4470310	131	5.12539e+21	0,2,4,0,0,0,0,0	124,25,33,159,156	0,0,0,0,0	183	149	1	1	1.0,0.981,0.988,1.0,1.0,1.0,1.0,1.0	1.0,1.0,1.0,1.0,1.0	-0.004	SE
132	Choren_v00_mik.OX359202.1G613	NA	chrOX359202.1	-	4474824	4474913	4474306	4474397	4475192	4475266	132	4,34,32,73,17,38,26,53	0,0,0,0,0,0,1,0	85,8,9,61,156	0,0,0,0,0	238	149	1	1	1.0,1.0,1.0,1.0,1.0,1.0,0.942,1.0	1.0,1.0,1.0,1.0,1.0	-0.007	SE
133	Choren_v00_mik.OX359202.1G611	NA	chrOX359202.1	+	4466764	4466889	4466332	4466422	4467284	4467389	133	0,6,0,11,0,6,5,1	3,12,127,30,12,8,45,35	17,2,2,0,0	51,4,16,0,12	274	149	1	1	0.0,0.214,0.0,0.166,0.0,0.29,0.057,0.015	0.153,0.214,0.064,NA,0.0	-0.015	SE
134	Choren_v00_mik.OX359202.1G607	NA	chrOX359202.1	+	4443204	4443240	4442970	4443065	4443304	4443387	134	0,0,1,17,0,0,0,12	0,0,0,0,0,0,0,4	18,0,0,0,0	0,0,0,0,0	185	149	1	1	NA,NA,1.0,1.0,NA,NA,NA,0.707	1.0,NA,NA,NA,NA	-0.098	SE
135	Choren_v00_mik.OX359202.1G607	NA	chrOX359202.1	+	4444697	4444732	4444443	4444632	4444794	4444957	135	0,32,14,32,12,12,29,39	0,0,0,2,0,0,0,0	39,5,6,48,27	0,0,0,0,0	184	149	1	1	NA,1.0,1.0,0.928,1.0,1.0,1.0,1.0	1.0,1.0,1.0,1.0,1.0	-0.01	SE
136	Choren_v00_mik.OX359202.1G606	NA	chrOX359202.1	+	4436913	4437026	4436354	4436450	4437119	4438824	136	0,29,0,11,1,8,2,24	0,4,0,0,0,0,0,0	16,2,0,10,0	0,0,0,0,0	262	149	1	1	NA,0.805,NA,1.0,1.0,1.0,1.0,1.0	1.0,1.0,NA,1.0,NA	-0.033	SE
137	Choren_v00_mik.OX359202.1G597	NA	chrOX359202.1	-	4373501	4373560	4373106	4373155	4374281	4374328	137	2,160,923,120,309,53,340,352	0,0,0,0,0,1,0,0	148,23,979,205,649	0,0,0,0,0	208	149	1	1	1.0,1.0,1.0,1.0,1.0,0.974,1.0,1.0	1.0,1.0,1.0,1.0,1.0	-0.003	SE
138	Choren_v00_mik.OX359202.1G597	NA	chrOX359202.1	-	4376557	4376626	4376098	4376306	4377108	4377310	138	6.84033e+23	0,0,0,0,0,0,0,0	3.92239e+16	0,0,14,0,0	218	149	1	1	1.0,1.0,1.0,1.0,1.0,1.0,1.0,1.0	1.0,1.0,0.989,1.0,1.0	0.002	SE
139	Choren_v00_mik.OX359202.1G589	NA	chrOX359202.1	+	4359043	4359118	4358888	4358955	4359258	4359461	139	0,43,178,22,25,55,25,19	0,0,2,0,0,0,0,0	42,32,272,116,241	0,0,3,0,3	224	149	1	1	NA,1.0,0.983,1.0,1.0,1.0,1.0,1.0	1.0,1.0,0.984,1.0,0.982	0.004	SE
140	Choren_v00_mik.OX359202.1G589	NA	chrOX359202.1	+	4359824	4360106	4359258	4359461	4360171	4360261	140	0,173,560,102,139,163,141,128	0,0,2,0,0,1,0,0	103,70,885,421,839	0,0,0,0,0	298	149	1	1	NA,1.0,0.993,1.0,1.0,0.988,1.0,1.0	1.0,1.0,1.0,1.0,1.0	-0.003	SE
141	Choren_v00_mik.OX359202.1G589	NA	chrOX359202.1	+	4360464	4360605	4360171	4360261	4361077	4361171	141	0,107,343,94,125,98,94,48	0,0,4,0,2,1,0,0	83,51,635,326,659	0,0,0,1,2	290	149	1	1	NA,1.0,0.978,1.0,0.97,0.981,1.0,1.0	1.0,1.0,1.0,0.994,0.994	-0.008	SE
142	Choren_v00_mik.OX359202.1G589	NA	chrOX359202.1	+	4361077	4361171	4360171	4360261	4361406	4361566	142	0,3,75,7,14,17,12,16	0,0,1,0,0,0,0,0	14,11,126,84,181	0,0,0,0,0	243	149	1	1	NA,1.0,0.979,1.0,1.0,1.0,1.0,1.0	1.0,1.0,1.0,1.0,1.0	-0.003	SE
143	Choren_v00_mik.OX359202.1G595	NA	chrOX359202.1	-	4357415	4357574	4357273	4357343	4357830	4358357	143	0,41,107,22,36,69,27,22	0,8,32,0,8,2,1,0	43,14,63,110,256	4,0,16,4,68	298	149	1	1	NA,0.719,0.626,1.0,0.692,0.945,0.931,1.0	0.843,1.0,0.663,0.932,0.653	0.027	SE
144	Choren_v00_mik.OX359202.1G588	NA	chrOX359202.1	+	4335974	4336997	4335164	4335825	4337802	4337898	144	0,39,141,8,33,24,2,6	0,0,1,0,0,0,0,0	25,16,5,13,22	0,0,0,0,0	298	149	1	1	NA,1.0,0.986,1.0,1.0,1.0,1.0,1.0	1.0,1.0,1.0,1.0,1.0	-0.002	SE
145	Choren_v00_mik.OX359202.1G588	NA	chrOX359202.1	+	4337062	4337161	4335974	4336997	4337802	4337898	145	1,45,243,43,49,27,17,10	0,0,2,0,0,0,0,0	62,19,6,9,77	0,0,0,0,0	248	149	1	1	1.0,1.0,0.986,1.0,1.0,1.0,1.0,1.0	1.0,1.0,1.0,1.0,1.0	-0.002	SE
146	Choren_v00_mik.OX359202.1G588	NA	chrOX359202.1	+	4341750	4341846	4341421	4341679	4342040	4342154	146	0,274,554,234,173,5,305,0	0,5,8,2,0,0,2,0	376,66,0,77,212	8,2,0,0,1	245	149	1	1	NA,0.971,0.977,0.986,1.0,1.0,0.989,NA	0.966,0.953,NA,1.0,0.992	0.009	SE
147	Choren_v00_mik.OX359202.1G572	NA	chrOX359202.1	+	4227928	4228001	4227054	4227356	4228192	4228254	147	9.22565e+21	0,0,0,0,0,0,0,0	383,57,229,60,354	2,0,0,0,0	222	149	1	1	1.0,1.0,1.0,1.0,1.0,1.0,1.0,1.0	0.992,1.0,1.0,1.0,1.0	0.002	SE
148	Choren_v00_mik.OX359202.1G572	NA	chrOX359202.1	+	4229273	4229381	4228192	4228254	4229858	4229935	148	3.29411e+22	0,0,1,0,0,0,0,0	635123421142482	0,0,0,0,0	257	149	1	1	1.0,1.0,0.998,1.0,1.0,1.0,1.0,1.0	1.0,1.0,1.0,1.0,1.0	0	SE
149	Choren_v00_mik.OX359202.1G569	NA	chrOX359202.1	-	4157214	4157379	4156974	4157127	4158396	4158480	149	3.21738e+21	0,0,2,0,0,0,0,0	281,91,148,33,45	0,0,0,0,0	298	149	1	1	1.0,1.0,0.99,1.0,1.0,1.0,1.0,1.0	1.0,1.0,1.0,1.0,1.0	-0.001	SE
150	Choren_v00_mik.OX359202.1G565	NA	chrOX359202.1	-	4124935	4125047	4124659	4124718	4125305	4125375	150	1,177,545,92,131,86,135,92	0,0,0,0,0,0,2,0	126,50,94,260,43	0,0,0,0,2	261	149	1	1	1.0,1.0,1.0,1.0,1.0,1.0,0.975,1.0	1.0,1.0,1.0,1.0,0.925	0.012	SE
151	Choren_v00_mik.OX359202.1G565	NA	chrOX359202.1	-	4125305	4125375	4124935	4125047	4125606	4125733	151	0,56,175,30,22,32,42,25	0,0,2,0,0,0,0,0	31,19,21,90,8	0,0,0,0,0	219	149	1	1	NA,1.0,0.983,1.0,1.0,1.0,1.0,1.0	1.0,1.0,1.0,1.0,1.0	-0.002	SE
152	Choren_v00_mik.OX359202.1G565	NA	chrOX359202.1	-	4125429	4125535	4125305	4125375	4125606	4125733	152	2,118,381,120,100,49,100,56	0,0,0,0,0,0,0,0	62,37,103,80,48	0,0,0,3,0	255	149	1	1	1.0,1.0,1.0,1.0,1.0,1.0,1.0,1.0	1.0,1.0,1.0,0.94,1.0	0.012	SE
153	Choren_v00_mik.OX359202.1G565	NA	chrOX359202.1	-	4125796	4125881	4125606	4125733	4125941	4126005	153	7,76,398,118,75,51,23,56	0,1,0,1,0,0,0,2	26,48,74,121,24	0,0,0,0,0	234	149	1	1	1.0,0.98,1.0,0.987,1.0,1.0,1.0,0.947	1.0,1.0,1.0,1.0,1.0	-0.011	SE
154	Choren_v00_mik.OX359202.1G547	NA	chrOX359202.1	+	3995134	3995223	3995021	3995068	3995280	3995450	154	0,137,266,69,143,79,100,72	0,6,15,3,9,2,4,6	54,41,383,266,329	0,1,3,13,11	238	149	1	1	NA,0.935,0.917,0.935,0.909,0.961,0.94,0.883	1.0,0.963,0.988,0.928,0.949	-0.04	SE
155	Choren_v00_mik.OX359202.1G547	NA	chrOX359202.1	+	3996711	3996810	3995280	3995450	3997291	3997354	155	2.21748e+21	0,0,0,0,0,0,2,0	128104435298512	0,0,6,0,5	248	149	1	1	1.0,1.0,1.0,1.0,1.0,1.0,0.984,1.0	1.0,1.0,0.978,1.0,0.984	0.006	SE
156	Choren_v00_mik.OX359202.1G546	NA	chrOX359202.1	+	3975937	3976010	3973641	3973760	3981596	3981731	156	0,52,137,31,30,24,26,23	0,0,0,0,0,0,0,0	24,18,155,104,133	0,0,0,0,3	222	149	1	1	NA,1.0,1.0,1.0,1.0,1.0,1.0,1.0	1.0,1.0,1.0,1.0,0.967	0.007	SE
157	Choren_v00_mik.OX359202.1G546	NA	chrOX359202.1	+	3984890	3985082	3981796	3981955	3985549	3985635	157	4,95,269,30,80,107,68,54	0,0,0,0,0,0,0,0	50,44,281,235,337	0,0,1,0,0	298	149	1	1	1.0,1.0,1.0,1.0,1.0,1.0,1.0,1.0	1.0,1.0,0.993,1.0,1.0	0.001	SE
158	Choren_v00_mik.OX359202.1G546	NA	chrOX359202.1	+	3989741	3989861	3985879	3985960	3990409	3990510	158	0,16,67,13,13,17,14,5	0,1,9,0,2,0,1,0	13,8,47,72,74	1,0,6,5,19	269	149	1	1	NA,0.899,0.805,1.0,0.783,1.0,0.886,1.0	0.878,1.0,0.813,0.889,0.683	0.058	SE
159	Choren_v00_mik.OX359202.1G546	NA	chrOX359202.1	+	3992862	3992969	3992635	3992727	3993216	3993304	159	0,56,134,21,36,60,66,27	0,0,0,1,0,0,0,0	29,22,111,97,159	0,0,1,0,0	256	149	1	1	NA,1.0,1.0,0.924,1.0,1.0,1.0,1.0	1.0,1.0,0.985,1.0,1.0	-0.008	SE
160	Choren_v00_mik.OX359202.1G546	NA	chrOX359202.1	+	3993044	3993148	3992862	3992969	3993216	3993304	160	0,163,304,42,87,91,145,93	0,0,1,0,0,0,0,0	56,53,300,225,330	0,0,1,0,2	253	149	1	1	NA,1.0,0.994,1.0,1.0,1.0,1.0,1.0	1.0,1.0,0.994,1.0,0.99	0.002	SE
161	Choren_v00_mik.OX359202.1G942	NA	chrOX359202.1	+	6446886	6446990	6445088	6445257	6448100	6448263	161	0,69,104,307,76,34,181,104	0,1,0,0,2,0,1,0	44,16,3,11,12	0,0,0,0,0	253	149	1	1	NA,0.976,1.0,1.0,0.957,1.0,0.991,1.0	1.0,1.0,1.0,1.0,1.0	-0.011	SE
162	Choren_v00_mik.OX359202.1G480	NA	chrOX359202.1	-	2643934	2644038	2643765	2643871	2644506	2644572	162	7.23484e+21	0,3,1,4,0,2,0,1	204,55,307,426,244	2,0,0,0,3	253	149	1	1	1.0,0.979,0.998,0.974,1.0,0.983,1.0,0.991	0.984,1.0,1.0,1.0,0.98	-0.002	SE
163	Choren_v00_mik.OX359202.1G480	NA	chrOX359202.1	-	2644652	2644841	2644506	2644572	2645456	2645530	163	3,99,394,76,86,47,66,70	0,0,2,0,0,0,0,0	60,17,165,181,120	0,0,0,0,0	298	149	1	1	1.0,1.0,0.99,1.0,1.0,1.0,1.0,1.0	1.0,1.0,1.0,1.0,1.0	-0.001	SE
165	Choren_v00_mik.OX359202.1G479	NA	chrOX359202.1	-	2619619	2619697	2619444	2619543	2619835	2619972	165	4.2295e+21	0,0,0,0,0,0,0,0	167,44,227,166,86	0,0,0,0,4	227	149	1	1	1.0,1.0,1.0,1.0,1.0,1.0,1.0,1.0	1.0,1.0,1.0,1.0,0.934	0.013	SE
166	Choren_v00_mik.OX359202.1G479	NA	chrOX359202.1	-	2632854	2632966	2619835	2619972	2642360	2642478	166	0,179,398,163,171,109,184,169	0,5,0,3,0,2,2,6	135,39,133,182,61	3,0,4,3,0	261	149	1	1	NA,0.953,1.0,0.969,1.0,0.969,0.981,0.941	0.963,1.0,0.95,0.972,1.0	-0.004	SE
167	Choren_v00_mik.OX359202.1G479	NA	chrOX359202.1	-	2642360	2642478	2632854	2632966	2642572	2642910	167	0,168,347,171,159,91,153,115	0,0,1,0,0,1,0,0	119,42,109,158,62	2,1,0,0,0	267	149	1	1	NA,1.0,0.995,1.0,1.0,0.981,1.0,1.0	0.971,0.959,1.0,1.0,1.0	0.011	SE
168	Choren_v00_mik.OX359202.1G470	NA	chrOX359202.1	+	2555031	2555149	2553720	2553891	2562888	2563044	168	0,7,63,1,14,4,0,10	0,0,1,0,0,0,0,0	1,3,31,21,4	0,0,0,0,0	267	149	1	1	NA,1.0,0.972,1.0,1.0,1.0,NA,1.0	1.0,1.0,1.0,1.0,1.0	-0.005	SE
170	Choren_v00_mik.OX359202.1G444	NA	chrOX359202.1	+	2405677	2405722	2404756	2404865	2405782	2405857	170	4,219,465,70,91,99,100,43	0,2,0,0,0,0,0,0	37,10,165,232,139	0,0,0,0,0	194	149	1	1	1.0,0.988,1.0,1.0,1.0,1.0,1.0,1.0	1.0,1.0,1.0,1.0,1.0	-0.002	SE
171	Choren_v00_mik.OX359202.1G439	NA	chrOX359202.1	+	2377784	2377999	2375043	2375161	2378250	2378339	171	2,152,553,80,161,96,76,71	0,0,0,0,0,0,0,2	87,55,296,357,234	0,0,0,0,0	298	149	1	1	1.0,1.0,1.0,1.0,1.0,1.0,1.0,0.947	1.0,1.0,1.0,1.0,1.0	-0.007	SE
172	Choren_v00_mik.OX359202.1G439	NA	chrOX359202.1	+	2381702	2381946	2380883	2381036	2382538	2382614	172	4.20148e+21	0,7,0,0,0,2,2,0	154,63,282,421,336	0,0,0,0,0	298	149	1	1	1.0,0.935,1.0,1.0,1.0,0.978,0.989,1.0	1.0,1.0,1.0,1.0,1.0	-0.012	SE
173	Choren_v00_mik.OX359202.1G441	NA	chrOX359202.1	-	2360984	2361041	2360369	2360533	2363699	2363949	173	0,1,1,0,0,0,0,0	1,9,46,0,6,3,21,13	0,1,0,0,2	3,4,24,16,49	206	149	1	1	0.0,0.074,0.015,NA,0.0,0.0,0.0,0.0	0.0,0.153,0.0,0.0,0.029	-0.024	SE
174	Choren_v00_mik.OX359202.1G441	NA	chrOX359202.1	-	2360984	2361057	2360369	2360533	2363699	2363949	174	0,1,2,0,0,0,0,0	1,9,46,0,6,3,21,13	1,2,0,2,4	3,4,24,16,49	222	149	1	1	0.0,0.069,0.028,NA,0.0,0.0,0.0,0.0	0.183,0.251,0.0,0.077,0.052	-0.099	SE
176	Choren_v00_mik.OX359202.1G433	NA	chrOX359202.1	-	2294077	2294146	2280900	2281046	2296694	2296830	176	6,197,737,100,205,138,146,84	0,0,9,0,0,0,0,0	77,30,171,140,175	0,0,0,0,0	218	149	1	1	1.0,1.0,0.982,1.0,1.0,1.0,1.0,1.0	1.0,1.0,1.0,1.0,1.0	-0.002	SE
178	Choren_v00_mik.OX359202.1G405	NA	chrOX359202.1	-	2111653	2111781	2110887	2111025	2112309	2112373	178	1,258,774,88,308,109,93,62	0,0,0,0,0,0,0,0	82,33,64,140,40	0,0,2,0,0	277	149	1	1	1.0,1.0,1.0,1.0,1.0,1.0,1.0,1.0	1.0,1.0,0.945,1.0,1.0	0.011	SE
179	Choren_v00_mik.OX359202.1G390	NA	chrOX359202.1	+	1985086	1985127	1984373	1984582	1985261	1985358	179	0,0,0,0,0,3,1,19	0,0,0,0,0,0,0,0	0,0,21,0,0	0,0,1,0,0	190	149	1	1	NA,NA,NA,NA,NA,1.0,1.0,1.0	NA,NA,0.943,NA,NA	0.057	SE
180	Choren_v00_mik.OX359202.1G384	NA	chrOX359202.1	+	1935464	1935543	1935068	1935172	1935762	1935837	180	2,72,251,70,233,58,47,76	0,1,0,0,0,0,0,0	122,34,78,163,138	0,0,0,0,0	228	149	1	1	1.0,0.979,1.0,1.0,1.0,1.0,1.0,1.0	1.0,1.0,1.0,1.0,1.0	-0.003	SE
182	Choren_v00_mik.OX359202.1G378	NA	chrOX359202.1	+	1918717	1918862	1917375	1917534	1920292	1920438	182	0,87,178,56,37,14,26,19	0,8,23,4,6,2,2,0	27,10,20,28,13	1,2,7,3,0	294	149	1	1	NA,0.846,0.797,0.876,0.758,0.78,0.868,1.0	0.932,0.717,0.592,0.825,1.0	0.033	SE
183	Choren_v00_mik.OX359202.1G377	NA	chrOX359202.1	+	1899990	1900268	1899537	1899597	1900541	1900717	183	0,2,3,0,0,8,0,0	0,0,0,0,0,0,0,0	2,59,4429,1933,5159	0,0,1,0,0	298	149	1	1	NA,1.0,1.0,NA,NA,1.0,NA,NA	1.0,1.0,1.0,1.0,1.0	0	SE
184	Choren_v00_mik.OX359202.1G377	NA	chrOX359202.1	+	1901214	1901463	1900805	1900951	1901737	1901854	184	0,3,3,0,0,5,0,7	0,0,0,0,0,0,0,0	12,46,3811,1405,2755	0,0,7,0,0	298	149	1	1	NA,1.0,1.0,NA,NA,1.0,NA,1.0	1.0,1.0,0.996,1.0,1.0	0.001	SE
185	Choren_v00_mik.OX359202.1G377	NA	chrOX359202.1	+	1903354	1903502	1902791	1903014	1903743	1903906	185	0,3,13,0,1,8,2,6	0,0,0,0,0,0,0,0	25,49,6463,1489,4847	0,0,2,0,0	297	149	1	1	NA,1.0,1.0,NA,1.0,1.0,1.0,1.0	1.0,1.0,0.999,1.0,1.0	0	SE
186	Choren_v00_mik.OX359202.1G377	NA	chrOX359202.1	+	1903992	1904160	1903743	1903906	1904639	1904723	186	0,1,16,0,0,3,0,4	0,0,0,0,0,0,0,0	5,16,3556,819,556	0,0,2,6,3	298	149	1	1	NA,1.0,1.0,NA,NA,1.0,NA,1.0	1.0,1.0,0.999,0.986,0.989	0.005	SE
187	Choren_v00_mik.OX359202.1G377	NA	chrOX359202.1	+	1904639	1904723	1903992	1904160	1904810	1904884	187	0,0,18,2,0,6,0,4	0,0,0,0,0,0,0,0	3,16,3947,763,123	0,0,0,1,0	233	149	1	1	NA,NA,1.0,1.0,NA,1.0,NA,1.0	1.0,1.0,1.0,0.998,1.0	0	SE
188	Choren_v00_mik.OX359202.1G377	NA	chrOX359202.1	+	1909356	1909428	1908899	1909108	1910034	1910300	188	0,5,14,0,2,2,3,1	0,0,0,0,0,0,0,0	11,3,3117,479,3244	0,0,0,0,1	221	149	1	1	NA,1.0,1.0,NA,1.0,1.0,1.0,1.0	1.0,1.0,1.0,1.0,1.0	0	SE
189	Choren_v00_mik.OX359202.1G377	NA	chrOX359202.1	+	1910907	1911033	1910454	1910585	1911598	1911726	189	0,6,52,3,18,16,13,5	0,0,0,0,0,0,0,0	101,93,8142,2863,10152	0,0,1,0,0	275	149	1	1	NA,1.0,1.0,1.0,1.0,1.0,1.0,1.0	1.0,1.0,1.0,1.0,1.0	0	SE
190	Choren_v00_mik.OX359202.1G360	NA	chrOX359202.1	-	1820113	1820210	1818916	1819048	1820649	1820749	190	0,35,99,9,27,32,4,27	0,0,0,0,0,0,0,0	53,12,23,43,0	1,0,0,0,0	246	149	1	1	NA,1.0,1.0,1.0,1.0,1.0,1.0,1.0	0.97,1.0,1.0,1.0,NA	0.008	SE
191	Choren_v00_mik.OX359202.1G360	NA	chrOX359202.1	-	1820536	1820592	1820113	1820210	1820649	1820749	191	0,68,210,52,38,45,16,49	0,0,0,0,0,0,0,0	84,16,21,53,13	1,0,0,0,0	205	149	1	1	NA,1.0,1.0,1.0,1.0,1.0,1.0,1.0	0.984,1.0,1.0,1.0,1.0	0.003	SE
192	Choren_v00_mik.OX359202.1G359	NA	chrOX359202.1	-	1800206	1800334	1797926	1798014	1805933	1806113	192	0,114,263,56,56,24,79,54	0,2,1,0,0,0,0,0	78,29,55,62,32	0,0,0,0,0	277	149	1	1	NA,0.968,0.993,1.0,1.0,1.0,1.0,1.0	1.0,1.0,1.0,1.0,1.0	-0.006	SE
193	Choren_v00_mik.OX359202.1G359	NA	chrOX359202.1	-	1803490	1803575	1800206	1800334	1805933	1806113	193	2,169,440,100,50,69,119,85	0,0,0,0,0,0,2,0	123,52,72,100,34	0,3,2,0,0	234	149	1	1	1.0,1.0,1.0,1.0,1.0,1.0,0.974,1.0	1.0,0.917,0.958,1.0,1.0	0.022	SE
194	Choren_v00_mik.OX359202.1G349	NA	chrOX359202.1	-	1733719	1733830	1733047	1733242	1733992	1734103	194	2,96,381,91,121,79,138,145	0,0,0,0,0,0,0,0	76,36,2210,852,2412	0,0,0,0,2	260	149	1	1	1.0,1.0,1.0,1.0,1.0,1.0,1.0,1.0	1.0,1.0,1.0,1.0,0.999	0	SE
195	Choren_v00_mik.OX359202.1G347	NA	chrOX359202.1	+	1729387	1729511	1726275	1726403	1729824	1730087	195	0,24,343,7,14,53,42,13	1,0,0,0,0,0,0,0	10,11,123,42,104	0,0,0,0,0	273	149	1	1	0.0,1.0,1.0,1.0,1.0,1.0,1.0,1.0	1.0,1.0,1.0,1.0,1.0	-0.125	SE
196	Choren_v00_mik.OX359202.1G342	NA	chrOX359202.1	+	1700203	1701853	1699266	1699357	1703199	1703351	196	2,124,352,74,98,50,62,89	0,0,0,6,0,0,0,0	85,37,899,559,1046	0,0,4,2,1	298	149	1	1	1.0,1.0,1.0,0.86,1.0,1.0,1.0,1.0	1.0,1.0,0.991,0.993,0.998	-0.014	SE
197	Choren_v00_mik.OX359202.1G342	NA	chrOX359202.1	+	1700206	1701853	1699266	1699357	1703199	1703351	197	1,109,300,56,82,35,59,59	0,0,0,6,0,0,0,0	71,34,804,477,924	0,0,4,2,1	298	149	1	1	1.0,1.0,1.0,0.824,1.0,1.0,1.0,1.0	1.0,1.0,0.99,0.992,0.998	-0.018	SE
198	Choren_v00_mik.OX359202.1G341	NA	chrOX359202.1	+	1685616	1685749	1684780	1684945	1685959	1686099	198	3.16157e+21	0,0,4,1,0,0,0,0	184,30,128,176,85	0,0,0,0,0	282	149	1	1	1.0,1.0,0.987,0.991,1.0,1.0,1.0,1.0	1.0,1.0,1.0,1.0,1.0	-0.003	SE
199	Choren_v00_mik.OX359202.1G341	NA	chrOX359202.1	+	1685616	1685776	1684780	1684945	1685959	1686099	199	4.17059e+21	0,0,4,1,0,0,0,0	195,30,131,198,94	0,0,0,0,0	298	149	1	1	1.0,1.0,0.987,0.992,1.0,1.0,1.0,1.0	1.0,1.0,1.0,1.0,1.0	-0.003	SE
200	Choren_v00_mik.OX359202.1G338	NA	chrOX359202.1	+	1667434	1667645	1666665	1666902	1667914	1668017	200	0,191,1166,49,299,120,186,66	0,0,3,0,2,0,0,0	41,48,203,328,185	0,2,0,0,0	298	149	1	1	NA,1.0,0.995,1.0,0.987,1.0,1.0,1.0	1.0,0.923,1.0,1.0,1.0	0.013	SE
202	Choren_v00_mik.OX359202.1G318	NA	chrOX359202.1	+	1485292	1485410	1485011	1485213	1485552	1485790	202	1,25,106,23,69,14,13,62	0,0,1,0,0,0,0,0	16,4,127,36,66	0,0,0,0,0	267	149	1	1	1.0,1.0,0.983,1.0,1.0,1.0,1.0,1.0	1.0,1.0,1.0,1.0,1.0	-0.002	SE
203	Choren_v00_mik.OX359202.1G318	NA	chrOX359202.1	+	1486254	1486338	1485552	1485790	1486532	1486659	203	0,8,109,35,48,3,17,35	0,0,1,0,0,0,0,0	17,8,86,14,52	0,0,0,0,0	233	149	1	1	NA,1.0,0.986,1.0,1.0,1.0,1.0,1.0	1.0,1.0,1.0,1.0,1.0	-0.002	SE
204	Choren_v00_mik.OX359202.1G316	NA	chrOX359202.1	-	1474310	1474396	1473524	1473614	1474884	1474924	204	0,41,115,58,27,47,31,48	0,0,3,0,0,0,0,0	42,9,67,40,15	0,0,0,0,0	235	149	1	1	NA,1.0,0.96,1.0,1.0,1.0,1.0,1.0	1.0,1.0,1.0,1.0,1.0	-0.006	SE
205	Choren_v00_mik.OX359202.1G316	NA	chrOX359202.1	-	1474988	1475068	1474884	1474924	1475275	1475439	205	1,57,144,55,40,57,26,73	0,0,1,0,0,0,0,0	48,10,92,66,30	0,0,0,0,0	229	149	1	1	1.0,1.0,0.989,1.0,1.0,1.0,1.0,1.0	1.0,1.0,1.0,1.0,1.0	-0.001	SE
207	Choren_v00_mik.OX359202.1G316	NA	chrOX359202.1	-	1475527	1475608	1475275	1475439	1476621	1476792	207	1,12,8,11,21,10,0,28	0,0,0,0,0,0,0,0	12,2,34,31,0	0,0,0,1,0	230	149	1	1	1.0,1.0,1.0,1.0,1.0,1.0,NA,1.0	1.0,1.0,1.0,0.953,NA	0.012	SE
208	Choren_v00_mik.OX359202.1G316	NA	chrOX359202.1	-	1475861	1475930	1475527	1475608	1476621	1476792	208	0,29,65,30,62,13,14,57	0,0,0,0,0,0,0,0	38,12,58,93,8	0,1,0,0,0	218	149	1	1	NA,1.0,1.0,1.0,1.0,1.0,1.0,1.0	1.0,0.891,1.0,1.0,1.0	0.022	SE
209	Choren_v00_mik.OX359202.1G316	NA	chrOX359202.1	-	1475861	1476551	1475275	1475439	1476621	1476792	209	0,4,2,6,10,3,0,29	0,0,0,0,0,0,0,0	9,0,16,30,0	0,0,0,1,0	298	149	1	1	NA,1.0,1.0,1.0,1.0,1.0,NA,1.0	1.0,NA,1.0,0.938,NA	0.021	SE
210	Choren_v00_mik.OX359202.1G316	NA	chrOX359202.1	-	1475861	1476551	1475527	1475608	1476621	1476792	210	0,25,7,13,42,3,1,62	0,0,0,0,0,0,0,0	25,0,57,45,0	0,1,0,0,0	298	149	1	1	NA,1.0,1.0,1.0,1.0,1.0,1.0,1.0	1.0,0.0,1.0,1.0,NA	0.25	SE
211	Choren_v00_mik.OX359202.1G313	NA	chrOX359202.1	+	1455470	1455592	1454290	1454418	1456759	1456880	211	0,177,388,112,144,106,140,126	0,1,0,0,0,0,0,0	79,37,91,124,44	0,0,0,0,0	271	149	1	1	NA,0.99,1.0,1.0,1.0,1.0,1.0,1.0	1.0,1.0,1.0,1.0,1.0	-0.001	SE
213	Choren_v00_mik.OX359202.1G313	NA	chrOX359202.1	+	1456959	1457053	1456759	1456880	1457815	1457930	213	0,111,311,79,57,82,124,57	0,0,0,0,0,0,2,0	91,33,53,93,32	0,0,0,0,0	243	149	1	1	NA,1.0,1.0,1.0,1.0,1.0,0.974,1.0	1.0,1.0,1.0,1.0,1.0	-0.004	SE
214	Choren_v00_mik.OX359202.1G313	NA	chrOX359202.1	+	1457815	1457930	1456959	1457053	1458178	1458309	214	4,152,389,82,68,94,180,81	0,0,0,0,0,0,0,0	97,45,58,99,21	0,0,0,0,2	264	149	1	1	1.0,1.0,1.0,1.0,1.0,1.0,1.0,1.0	1.0,1.0,1.0,1.0,0.856	0.029	SE
215	Choren_v00_mik.OX359202.1G309	NA	chrOX359202.1	+	1434940	1434993	1434345	1434370	1437039	1437126	215	0,144,890,111,79,87,89,68	0,0,0,0,0,0,0,0	68,17,99,192,97	0,0,0,1,0	202	149	1	1	NA,1.0,1.0,1.0,1.0,1.0,1.0,1.0	1.0,1.0,1.0,0.993,1.0	0.001	SE
216	Choren_v00_mik.OX359202.1G309	NA	chrOX359202.1	+	1439112	1439188	1438103	1438207	1439840	1440034	216	0,177,1431,149,203,173,186,103	0,1,3,0,0,0,0,0	85,17,223,441,247	0,0,0,4,2	225	149	1	1	NA,0.992,0.997,1.0,1.0,1.0,1.0,1.0	1.0,1.0,1.0,0.986,0.988	0.004	SE
218	Choren_v00_mik.OX359202.1G307	NA	chrOX359202.1	-	1408778	1408910	1407436	1407678	1409247	1409343	218	9.33779e+21	0,1,0,8,0,0,0,0	226,85,247,219,221	0,0,0,0,0	281	149	1	1	1.0,0.994,1.0,0.961,1.0,1.0,1.0,1.0	1.0,1.0,1.0,1.0,1.0	-0.006	SE
220	Choren_v00_mik.OX359202.1G307	NA	chrOX359202.1	-	1409667	1409697	1409504	1409552	1410226	1410302	220	0,16,38,12,11,10,12,2	0,3,42,3,6,3,1,3	9,0,24,4,20	0,3,19,11,8	179	149	1	1	NA,0.816,0.43,0.769,0.604,0.735,0.909,0.357	1.0,0.0,0.513,0.232,0.675	0.176	SE
221	Choren_v00_mik.OX359202.1G298	NA	chrOX359202.1	+	1386690	1386759	1385500	1385572	1387794	1387884	221	2.34391e+21	0,0,4,0,0,0,0,0	244,78,538,356,214	6,0,0,0,0	218	149	1	1	1.0,1.0,0.994,1.0,1.0,1.0,1.0,1.0	0.965,1.0,1.0,1.0,1.0	0.006	SE
222	Choren_v00_mik.OX359202.1G296	NA	chrOX359202.1	+	1372474	1372593	1372054	1372150	1373071	1373156	222	0,138,67,59,19,10,3,3	0,0,2,0,0,0,0,0	4,3,19,30,14	0,0,0,0,0	268	149	1	1	NA,1.0,0.949,1.0,1.0,1.0,1.0,1.0	1.0,1.0,1.0,1.0,1.0	-0.007	SE
223	Choren_v00_mik.OX359202.1G296	NA	chrOX359202.1	+	1375146	1375211	1375038	1375093	1375376	1375551	223	0,26,85,30,43,51,46,38	0,5,32,5,7,3,2,2	8,7,44,78,35	10,3,8,11,4	214	149	1	1	NA,0.784,0.649,0.807,0.81,0.922,0.941,0.93	0.358,0.619,0.793,0.832,0.859	0.143	SE
224	Choren_v00_mik.OX359202.1G296	NA	chrOX359202.1	+	1376031	1376048	1375607	1375719	1376119	1376272	224	0,0,1,0,0,1,0,0	0,0,1,0,0,0,0,0	1,0,4,0,3	0,0,0,0,1	166	149	1	1	NA,NA,0.473,NA,NA,1.0,NA,NA	1.0,NA,1.0,NA,0.729	-0.173	SE
225	Choren_v00_mik.OX359202.1G272	NA	chrOX359202.1	+	1208300	1208650	1205895	1206011	1208877	1208885	225	0,24,96,28,27,11,30,27	0,0,0,0,0,0,0,0	32,8,37,53,8	1,0,2,0,0	298	149	1	1	NA,1.0,1.0,1.0,1.0,1.0,1.0,1.0	0.941,1.0,0.902,1.0,1.0	0.031	SE
226	Choren_v00_mik.OX359202.1G265	NA	chrOX359202.1	+	1140968	1141110	1140820	1140901	1141529	1141647	226	0,43,46,34,28,43,38,44	0,2,0,0,0,0,0,1	56,17,7,95,41	0,0,0,0,0	291	149	1	1	NA,0.917,1.0,1.0,1.0,1.0,1.0,0.957	1.0,1.0,1.0,1.0,1.0	-0.018	SE
227	Choren_v00_mik.OX359202.1G265	NA	chrOX359202.1	+	1141195	1141242	1140968	1141110	1141529	1141647	227	2.15639e+21	0,0,1,0,2,0,0,0	93,55,141,301,109	0,0,0,0,0	196	149	1	1	1.0,1.0,0.997,1.0,0.985,1.0,1.0,1.0	1.0,1.0,1.0,1.0,1.0	-0.002	SE
229	Choren_v00_mik.OX359202.1G242	NA	chrOX359202.1	+	1063490	1063826	1063260	1063380	1064003	1064135	229	7.3347e+37	0,0,0,0,1,0,0,0	2.86797e+22	6,0,0,0,1	298	149	1	1	1.0,1.0,1.0,1.0,1.0,1.0,1.0,1.0	1.0,1.0,1.0,1.0,1.0	0	SE
231	Choren_v00_mik.OX359202.1G241	NA	chrOX359202.1	+	1062347	1062407	1062059	1062169	1062470	1062600	231	0,26,93,22,23,19,6,16	0,0,0,0,0,0,0,0	147,9,90,71,107	0,0,2,0,0	209	149	1	1	NA,1.0,1.0,1.0,1.0,1.0,1.0,1.0	1.0,1.0,0.97,1.0,1.0	0.006	SE
232	Choren_v00_mik.OX359202.1G940	NA	chrOX359202.1	+	6425724	6425810	6425573	6425646	6425914	6426023	232	0,50,50,63,44,67,72,70	0,0,11,0,0,2,0,0	57,24,70,145,94	0,0,0,1,4	235	149	1	1	NA,1.0,0.742,1.0,1.0,0.955,1.0,1.0	1.0,1.0,1.0,0.989,0.937	-0.028	SE
233	Choren_v00_mik.OX359202.1G940	NA	chrOX359202.1	+	6426860	6426939	6426692	6426798	6427004	6427081	233	0,13,300,13,26,101,104,60	0,0,0,0,0,0,0,0	80,23,70,54,123	0,0,0,0,1	228	149	1	1	NA,1.0,1.0,1.0,1.0,1.0,1.0,1.0	1.0,1.0,1.0,1.0,0.988	0.002	SE
234	Choren_v00_mik.OX359202.1G940	NA	chrOX359202.1	+	6427004	6427081	6426860	6426939	6427466	6427597	234	1,13,291,9,26,79,114,60	0,0,1,0,0,0,1,0	77,15,68,38,133	0,0,0,0,1	226	149	1	1	1.0,1.0,0.995,1.0,1.0,1.0,0.987,1.0	1.0,1.0,1.0,1.0,0.989	0	SE
235	Choren_v00_mik.OX359202.1G234	NA	chrOX359202.1	+	1017299	1017355	1016955	1017063	1017671	1017771	235	0,74,442,135,150,67,47,78	0,0,0,0,0,0,0,0	82,12,64,212,39	0,0,0,4,0	205	149	1	1	NA,1.0,1.0,1.0,1.0,1.0,1.0,1.0	1.0,1.0,1.0,0.975,1.0	0.005	SE
236	Choren_v00_mik.OX359202.1G231	NA	chrOX359202.1	-	969016	969161	968358	968913	970261	970498	236	0,285,414,0,487,97,0,402	0,0,5,0,2,2,0,5	0,34,0,63,1	0,2,0,6,0	294	149	1	1	NA,1.0,0.977,NA,0.992,0.961,NA,0.976	NA,0.896,NA,0.842,1.0	0.069	SE
237	Choren_v00_mik.OX359202.1G229	NA	chrOX359202.1	-	943937	944264	942622	943768	945056	945160	237	1,88,279,99,146,103,99,123	0,0,0,0,0,0,0,0	77,52,229,296,108	0,0,4,0,0	298	149	1	1	1.0,1.0,1.0,1.0,1.0,1.0,1.0,1.0	1.0,1.0,0.966,1.0,1.0	0.007	SE
238	Choren_v00_mik.OX359202.1G229	NA	chrOX359202.1	-	948694	948847	948255	948355	949075	949187	238	1,6,253,43,81,45,40,17	0,0,0,0,0,0,0,1	12,16,149,258,86	0,0,0,0,0	298	149	1	1	1.0,1.0,1.0,1.0,1.0,1.0,1.0,0.895	1.0,1.0,1.0,1.0,1.0	-0.013	SE
239	Choren_v00_mik.OX359202.1G215	NA	chrOX359202.1	+	883261	883389	882952	882991	883508	883739	239	7.55914e+22	0,0,3,0,2,0,0,0	224115356275406	0,0,0,0,0	277	149	1	1	1.0,1.0,0.996,1.0,0.994,1.0,1.0,1.0	1.0,1.0,1.0,1.0,1.0	-0.001	SE
241	Choren_v00_mik.OX359202.1G207	NA	chrOX359202.1	+	842087	842142	841695	842026	842534	842627	241	0,28,352,1,8,52,14,0	0,0,1,0,0,0,0,0	21,14,64,15,25	0,0,0,0,1	204	149	1	1	NA,1.0,0.996,1.0,1.0,1.0,1.0,NA	1.0,1.0,1.0,1.0,0.948	0.01	SE
242	Choren_v00_mik.OX359202.1G177	NA	chrOX359202.1	-	728220	729900	727741	727869	730672	730813	242	0,18,23,53,11,55,84,30	0,2,0,0,0,0,0,0	20,39,420,61,681	0,0,0,0,0	298	149	1	1	NA,0.818,1.0,1.0,1.0,1.0,1.0,1.0	1.0,1.0,1.0,1.0,1.0	-0.026	SE
243	Choren_v00_mik.OX359202.1G173	NA	chrOX359202.1	-	698037	698101	697854	697891	698164	698219	243	0,75,796,38,110,46,63,38	0,0,0,2,0,0,0,0	92,30,37,52,2	0,0,0,0,0	213	149	1	1	NA,1.0,1.0,0.93,1.0,1.0,1.0,1.0	1.0,1.0,1.0,1.0,1.0	-0.01	SE
244	Choren_v00_mik.OX359202.1G173	NA	chrOX359202.1	-	701681	701766	701165	701330	701905	702016	244	0,33,3,7,59,23,46,22	0,0,0,0,6,0,0,0	39,19,6,18,0	0,0,0,0,0	234	149	1	1	NA,1.0,1.0,1.0,0.862,1.0,1.0,1.0	1.0,1.0,1.0,1.0,NA	-0.02	SE
245	Choren_v00_mik.OX359202.1G163	NA	chrOX359202.1	+	672968	673049	672583	672665	673485	673526	245	19,45,63,228,44,269,605,188	0,0,0,0,0,0,10,0	35,92,16,335,214	0,0,0,0,0	230	149	1	1	1.0,1.0,1.0,1.0,1.0,1.0,0.975,1.0	1.0,1.0,1.0,1.0,1.0	-0.003	SE
246	Choren_v00_mik.OX359202.1G149	NA	chrOX359202.1	-	628809	628855	628371	628702	629108	629380	246	0,0,0,0,0,2,8,0	0,17,1,59,0,11,8,68	0,1,0,12,0	17,1,21,9,16	195	149	1	1	NA,0.0,0.0,0.0,NA,0.122,0.433,0.0	0.0,0.433,0.0,0.505,0.0	-0.095	SE
247	Choren_v00_mik.OX359202.1G105	NA	chrOX359202.1	+	491508	491591	491334	491447	491784	492011	247	1.58062e+24	0,0,0,2,1,0,4,0	704172395362123	1,0,0,0,0	232	149	1	1	1.0,1.0,1.0,0.995,0.998,1.0,0.995,1.0	0.998,1.0,1.0,1.0,1.0	-0.001	SE
248	Choren_v00_mik.OX359202.1G90	NA	chrOX359202.1	-	428470	428542	428233	428371	428600	428649	248	3.02464e+29	0,0,2,0,0,0,0,0	4.63204e+16	0,0,2,2,0	221	149	1	1	1.0,1.0,1.0,1.0,1.0,1.0,1.0,1.0	1.0,1.0,0.999,0.995,1.0	0.001	SE
250	Choren_v00_mik.OX359202.1G90	NA	chrOX359202.1	-	429027	429097	428885	428953	429156	429218	250	2.0295e+30	0,0,1,0,0,0,0,0	5.57242e+17	0,0,0,0,0	219	149	1	1	1.0,1.0,1.0,1.0,1.0,1.0,1.0,1.0	1.0,1.0,1.0,1.0,1.0	0	SE
251	Choren_v00_mik.OX359202.1G84	NA	chrOX359202.1	+	402823	402937	402637	402751	403283	403391	251	0,57,120,45,50,32,71,39	0,0,0,0,0,0,0,0	30,42,117,105,134	0,0,0,0,1	263	149	1	1	NA,1.0,1.0,1.0,1.0,1.0,1.0,1.0	1.0,1.0,1.0,1.0,0.987	0.003	SE
252	Choren_v00_mik.OX359202.1G84	NA	chrOX359202.1	+	402998	403117	402823	402937	403283	403391	252	3,141,360,144,87,114,192,113	0,1,0,0,0,0,8,0	77,57,341,273,386	0,0,0,0,0	268	149	1	1	1.0,0.987,1.0,1.0,1.0,1.0,0.93,1.0	1.0,1.0,1.0,1.0,1.0	-0.01	SE
253	Choren_v00_mik.OX359202.1G84	NA	chrOX359202.1	+	404914	405061	403283	403391	405735	405763	253	0,185,325,169,17,26,203,237	0,0,1,0,0,0,0,0	80,60,359,118,437	0,0,0,0,0	296	149	1	1	NA,1.0,0.994,1.0,1.0,1.0,1.0,1.0	1.0,1.0,1.0,1.0,1.0	-0.001	SE
254	Choren_v00_mik.OX359202.1G84	NA	chrOX359202.1	+	405735	405763	403283	403391	406297	406477	254	0,1,6,7,0,4,3,0	0,0,0,0,0,0,0,0	5,0,16,2,14	0,0,2,0,0	177	149	1	1	NA,1.0,1.0,1.0,NA,1.0,1.0,NA	1.0,NA,0.871,1.0,1.0	0.032	SE
255	Choren_v00_mik.OX359202.1G84	NA	chrOX359202.1	+	407034	407404	406297	406477	407572	407758	255	0,40,60,40,19,11,94,20	0,4,4,1,2,2,8,0	23,37,76,45,49	2,0,16,3,9	298	149	1	1	NA,0.833,0.882,0.952,0.826,0.733,0.855,1.0	0.852,1.0,0.704,0.882,0.731	0.035	SE
257	Choren_v00_mik.OX359202.1G87	NA	chrOX359202.1	-	396533	396617	396191	396248	396734	396831	257	2,72,281,57,25,19,136,112	0,0,2,0,0,0,0,0	53,17,50,79,24	0,0,0,5,0	233	149	1	1	1.0,1.0,0.989,1.0,1.0,1.0,1.0,1.0	1.0,1.0,1.0,0.91,1.0	0.017	SE
258	Choren_v00_mik.OX359202.1G87	NA	chrOX359202.1	-	401201	401292	400215	401018	401621	401843	258	0,15,128,23,17,22,5,36	0,0,5,0,1,0,0,0	13,12,25,68,7	0,0,0,0,0	240	149	1	1	NA,1.0,0.941,1.0,0.913,1.0,1.0,1.0	1.0,1.0,1.0,1.0,1.0	-0.021	SE
259	Choren_v00_mik.OX359202.1G79	NA	chrOX359202.1	-	363868	364002	363460	363552	364268	364432	259	4,115,294,143,115,117,103,77	0,0,4,0,2,0,0,0	85,31,69,113,54	0,0,0,0,0	283	149	1	1	1.0,1.0,0.975,1.0,0.968,1.0,1.0,1.0	1.0,1.0,1.0,1.0,1.0	-0.007	SE
260	Choren_v00_mik.OX359202.1G73	NA	chrOX359202.1	+	336578	336707	336357	336462	336972	337138	260	0,46,91,95,31,6,44,55	0,0,0,0,0,0,0,0	63,55,264,126,400	0,0,2,0,0	278	149	1	1	NA,1.0,1.0,1.0,1.0,1.0,1.0,1.0	1.0,1.0,0.986,1.0,1.0	0.003	SE
261	Choren_v00_mik.OX359202.1G70	NA	chrOX359202.1	-	315635	315650	315141	315266	316114	316184	261	0,1,0,2,0,0,1,6	0,1,20,7,11,11,0,4	1,0,1,0,5	19,6,187,134,173	164	149	1	1	NA,0.476,0.0,0.206,0.0,0.0,1.0,0.577	0.046,0.0,0.005,0.0,0.026	0.307	SE
262	Choren_v00_mik.OX359202.1G68	NA	chrOX359202.1	-	294333	294455	293692	293836	294548	294633	262	5,235,684,94,130,133,203,156	0,5,0,0,0,0,1,0	72,30,65,48,29	0,0,0,0,0	271	149	1	1	1.0,0.963,1.0,1.0,1.0,1.0,0.991,1.0	1.0,1.0,1.0,1.0,1.0	-0.006	SE
263	Choren_v00_mik.OX359202.1G68	NA	chrOX359202.1	-	294548	294633	293692	293836	294868	294972	263	0,49,101,3,24,8,16,6	0,0,0,0,0,1,0,0	2,2,4,16,12	0,0,0,0,0	234	149	1	1	NA,1.0,1.0,1.0,1.0,0.836,1.0,1.0	1.0,1.0,1.0,1.0,1.0	-0.023	SE
264	Choren_v00_mik.OX359202.1G68	NA	chrOX359202.1	-	295204	295498	294868	294972	296115	296325	264	5.27672e+21	0,0,0,0,0,2,0,0	65,39,134,111,69	0,0,0,0,0	298	149	1	1	1.0,1.0,1.0,1.0,1.0,0.977,1.0,1.0	1.0,1.0,1.0,1.0,1.0	-0.003	SE
265	Choren_v00_mik.OX359202.1G51	NA	chrOX359202.1	-	237197	237308	237070	237113	237448	237616	265	0,46,0,0,0,0,0,0	0,5,0,0,0,0,0,0	0,8,0,0,0	0,0,0,0,0	260	149	1	1	NA,0.841,NA,NA,NA,NA,NA,NA	NA,1.0,NA,NA,NA	-0.159	SE
266	Choren_v00_mik.OX359202.1G47	NA	chrOX359202.1	-	214760	215207	213597	214661	215368	215707	266	0,0,2,27,4,3,22,11	0,0,0,0,0,0,0,0	21,1,33,2,8	0,0,0,0,3	298	149	1	1	NA,NA,1.0,1.0,1.0,1.0,1.0,1.0	1.0,1.0,1.0,1.0,0.571	0.086	SE
267	Choren_v00_mik.OX359202.1G40	NA	chrOX359202.1	-	154840	154955	154516	154627	155009	155103	267	0,88,287,119,101,118,108,112	0,0,1,0,0,0,0,0	127,44,55,88,20	0,0,0,0,0	264	149	1	1	NA,1.0,0.994,1.0,1.0,1.0,1.0,1.0	1.0,1.0,1.0,1.0,1.0	-0.001	SE
268	Choren_v00_mik.OX359202.1G39	NA	chrOX359202.1	-	151247	151295	151093	151189	151451	151499	268	1.71299e+26	0,0,6,0,0,0,0,0	4171326111026540	0,0,0,0,0	197	149	1	1	1.0,1.0,0.998,1.0,1.0,1.0,1.0,1.0	1.0,1.0,1.0,1.0,1.0	0	SE
269	Choren_v00_mik.OX359202.1G37	NA	chrOX359202.1	-	143519	143609	143356	143458	144182	144243	269	0,0,0,0,0,9,0,3	0,0,2,0,0,0,0,0	5,0,0,7,13	0,0,0,0,0	239	149	1	1	NA,NA,0.0,NA,NA,1.0,NA,1.0	1.0,NA,NA,1.0,1.0	-0.333	SE
270	Choren_v00_mik.OX359202.1G37	NA	chrOX359202.1	-	143670	143748	143519	143609	144182	144243	270	0,0,2,2,4,5,10,4	0,0,0,0,0,0,0,0	5,2,0,2,16	0,0,0,7,0	227	149	1	1	NA,NA,1.0,1.0,1.0,1.0,1.0,1.0	1.0,1.0,NA,0.158,1.0	0.211	SE
271	Choren_v00_mik.OX359202.1G31	NA	chrOX359202.1	-	118401	118494	118244	118334	118565	118661	271	2.59664e+25	0,0,0,1,0,0,0,0	1137280763608260	0,0,0,0,0	242	149	1	1	1.0,1.0,1.0,0.999,1.0,1.0,1.0,1.0	1.0,1.0,1.0,1.0,1.0	0	SE
272	Choren_v00_mik.OX359202.1G19	NA	chrOX359202.1	-	82353	82373	82135	82292	82434	82506	272	5.27189e+21	0,0,0,2,0,0,0,0	301123653479725	0,0,0,0,0	169	149	1	1	1.0,1.0,1.0,0.993,1.0,1.0,1.0,1.0	1.0,1.0,1.0,1.0,1.0	-0.001	SE
273	Choren_v00_mik.OX359202.1G18	NA	chrOX359202.1	-	81385	81416	81209	81320	81473	81527	273	1.23231e+23	0,0,0,0,0,2,0,0	467150704469763	0,0,0,0,0	180	149	1	1	1.0,1.0,1.0,1.0,1.0,0.993,1.0,1.0	1.0,1.0,1.0,1.0,1.0	-0.001	SE
274	Choren_v00_mik.OX359202.1G16	NA	chrOX359202.1	-	68239	68510	67606	67666	68723	68962	274	9.71633e+28	0,13,18,0,15,4,10,0	3.80165e+17	2,0,5,7,14	298	149	1	1	1.0,0.996,0.999,1.0,0.997,0.998,0.997,1.0	0.99,1.0,0.996,0.995,0.985	0.005	SE
275	Choren_v00_mik.OX359202.1G16	NA	chrOX359202.1	-	69025	69186	68723	68962	69477	69549	275	1.03564e+28	0,2,2,0,0,0,0,0	135,85,1234,1466,914	1,0,0,0,0	298	149	1	1	1.0,0.999,1.0,1.0,1.0,1.0,1.0,1.0	0.985,1.0,1.0,1.0,1.0	0.003	SE
276	Choren_v00_mik.OX359202.1G16	NA	chrOX359202.1	-	70454	70533	69477	69549	71569	71680	276	0,0,2,0,0,0,1,2	0,1,7,0,4,0,0,0	0,0,0,0,5	0,0,0,0,6	228	149	1	1	NA,0.0,0.157,NA,0.0,NA,1.0,1.0	NA,NA,NA,NA,0.353	0.078	SE
277	Choren_v00_mik.OX359202.1G16	NA	chrOX359202.1	-	71299	71351	70454	70533	71569	71680	277	0,44,144,28,43,36,33,41	0,0,2,0,0,0,1,2	44,7,51,136,61	0,0,0,0,5	201	149	1	1	NA,1.0,0.982,1.0,1.0,1.0,0.961,0.938	1.0,1.0,1.0,1.0,0.9	0.003	SE
278	Choren_v00_mik.OX359202.1G12	NA	chrOX359202.1	+	58038	58104	57297	57415	58165	58337	278	0,37,217,54,81,48,49,64	0,0,0,0,0,0,0,0	37,21,61,92,24	0,0,0,1,0	215	149	1	1	NA,1.0,1.0,1.0,1.0,1.0,1.0,1.0	1.0,1.0,1.0,0.985,1.0	0.003	SE
279	Choren_v00_mik.OX359202.1G12	NA	chrOX359202.1	+	58580	58618	58394	58511	60128	60234	279	0,75,429,48,147,72,91,90	0,0,0,0,0,2,0,0	83,21,104,125,34	0,0,0,0,0	187	149	1	1	NA,1.0,1.0,1.0,1.0,0.966,1.0,1.0	1.0,1.0,1.0,1.0,1.0	-0.005	SE
280	Choren_v00_mik.OX359202.1G12	NA	chrOX359202.1	+	63456	63529	63298	63402	63590	63656	280	8.20789e+21	0,0,8,0,2,2,2,0	237,91,218,246,132	0,2,0,0,4	222	149	1	1	1.0,1.0,0.987,1.0,0.991,0.987,0.991,1.0	1.0,0.968,1.0,1.0,0.957	0.009	SE
281	Choren_v00_mik.OX359202.1G12	NA	chrOX359202.1	+	64048	64123	63590	63656	64403	64483	281	1,97,312,128,89,121,167,50	0,0,2,0,0,0,0,0	82,19,73,96,39	0,0,0,0,0	224	149	1	1	1.0,1.0,0.99,1.0,1.0,1.0,1.0,1.0	1.0,1.0,1.0,1.0,1.0	-0.001	SE
282	Choren_v00_mik.OX359202.1G7	NA	chrOX359202.1	-	18180	18279	18049	18122	18340	18465	282	2,114,867,95,187,125,243,148	0,0,0,0,0,0,2,0	157,40,110,117,59	0,0,0,0,0	248	149	1	1	1.0,1.0,1.0,1.0,1.0,1.0,0.986,1.0	1.0,1.0,1.0,1.0,1.0	-0.002	SE
283	Choren_v00_mik.OX359202.1G6	NA	chrOX359202.1	-	11509	11576	11355	11414	11648	11806	283	1,0,0,0,0,0,0,33	0,0,0,0,0,0,0,0	0,0,0,0,0	6,0,0,0,0	216	149	1	1	1.0,NA,NA,NA,NA,NA,NA,1.0	0.0,NA,NA,NA,NA	1	SE
284	Choren_v00_mik.OX359201.1G1008	NA	chrOX359201.1	+	6877617	6877721	6877468	6877558	6878055	6878203	284	1.43999e+22	0,0,0,0,0,0,2,0	379181251204143	0,0,0,0,0	253	149	1	1	1.0,1.0,1.0,1.0,1.0,1.0,0.995,1.0	1.0,1.0,1.0,1.0,1.0	-0.001	SE
285	Choren_v00_mik.OX359201.1G1008	NA	chrOX359201.1	+	6877617	6877730	6877468	6877558	6878055	6878203	285	3.31047e+27	0,0,0,0,0,0,2,0	1044371593620370	0,0,0,0,0	262	149	1	1	1.0,1.0,1.0,1.0,1.0,1.0,0.998,1.0	1.0,1.0,1.0,1.0,1.0	0	SE
286	Choren_v00_mik.OX359201.1G1004	NA	chrOX359201.1	+	6865645	6865694	6865561	6865586	6865756	6865928	286	0,137,284,96,55,48,87,57	0,0,8,6,3,0,0,0	85,45,354,575,224	1,0,4,6,8	198	149	1	1	NA,1.0,0.964,0.923,0.932,1.0,1.0,1.0	0.985,1.0,0.985,0.986,0.955	-0.008	SE
287	Choren_v00_mik.OX359201.1G1004	NA	chrOX359201.1	+	6865756	6865928	6865561	6865586	6865987	6866076	287	2,249,592,154,186,159,240,99	0,1,0,0,0,0,0,0	95,81,719,905,639	0,0,0,0,0	298	149	1	1	1.0,0.992,1.0,1.0,1.0,1.0,1.0,1.0	1.0,1.0,1.0,1.0,1.0	-0.001	SE
288	Choren_v00_mik.OX359201.1G1004	NA	chrOX359201.1	+	6866542	6866623	6865987	6866076	6866729	6866840	288	0,180,551,105,183,82,157,132	0,2,0,0,0,0,0,2	82,48,668,713,719	1,0,5,1,6	230	149	1	1	NA,0.983,1.0,1.0,1.0,1.0,1.0,0.977	0.982,1.0,0.989,0.998,0.987	0.003	SE
289	Choren_v00_mik.OX359201.1G1003	NA	chrOX359201.1	+	6861913	6861998	6861770	6861857	6862345	6862395	289	0,62,150,48,53,41,31,64	0,1,9,3,0,0,0,8	45,31,1816,867,1982	0,2,18,2,10	234	149	1	1	NA,0.975,0.914,0.911,1.0,1.0,1.0,0.836	1.0,0.908,0.985,0.996,0.992	-0.028	SE
290	Choren_v00_mik.OX359201.1G1003	NA	chrOX359201.1	+	6862682	6862751	6862453	6862540	6863071	6863110	290	4,133,177,59,70,45,52,50	0,0,0,0,0,0,0,0	69,65,1525,1008,2020	0,0,0,0,1	218	149	1	1	1.0,1.0,1.0,1.0,1.0,1.0,1.0,1.0	1.0,1.0,1.0,1.0,0.999	0	SE
291	Choren_v00_mik.OX359201.1G1003	NA	chrOX359201.1	+	6863275	6863459	6863171	6863214	6863520	6863606	291	5,146,306,94,91,81,108,75	0,0,0,0,0,0,0,0	100,88,3474,1487,3924	0,0,0,2,0	298	149	1	1	1.0,1.0,1.0,1.0,1.0,1.0,1.0,1.0	1.0,1.0,1.0,0.997,1.0	0.001	SE
292	Choren_v00_mik.OX359201.1G1003	NA	chrOX359201.1	+	6863664	6863796	6863520	6863606	6863954	6864044	292	2,128,234,99,94,65,83,59	0,0,2,0,0,0,0,0	82,63,2644,1120,2718	0,0,0,0,0	281	149	1	1	1.0,1.0,0.984,1.0,1.0,1.0,1.0,1.0	1.0,1.0,1.0,1.0,1.0	-0.002	SE
293	Choren_v00_mik.OX359201.1G1003	NA	chrOX359201.1	+	6864413	6864494	6864211	6864353	6864545	6864603	293	1.16919e+21	0,0,0,0,0,0,0,0	168,92,3218,1586,3090	0,0,0,0,2	230	149	1	1	1.0,1.0,1.0,1.0,1.0,1.0,1.0,1.0	1.0,1.0,1.0,1.0,0.999	0	SE
294	Choren_v00_mik.OX359201.1G1001	NA	chrOX359201.1	-	6824564	6824616	6824195	6824269	6824692	6824723	294	8,230,440,95,171,93,40,17	0,1,0,0,0,0,0,0	72,54,0,274,127	0,0,0,0,0	201	149	1	1	1.0,0.994,1.0,1.0,1.0,1.0,1.0,1.0	1.0,1.0,NA,1.0,1.0	-0.001	SE
296	Choren_v00_mik.OX359201.1G991	NA	chrOX359201.1	-	6800774	6800824	6800459	6800720	6802473	6802588	296	0,147,449,140,123,116,174,147	0,0,5,8,9,4,6,7	92,46,163,162,98	6,4,9,3,14	199	149	1	1	NA,1.0,0.985,0.929,0.911,0.956,0.956,0.94	0.92,0.896,0.931,0.976,0.84	0.041	SE
297	Choren_v00_mik.OX359201.1G988	NA	chrOX359201.1	-	6788428	6788488	6788239	6788339	6789023	6789100	297	0,11,28,12,46,12,26,5	0,0,0,0,0,0,0,0	28,13,144,162,154	0,0,0,0,1	209	149	1	1	NA,1.0,1.0,1.0,1.0,1.0,1.0,1.0	1.0,1.0,1.0,1.0,0.991	0.002	SE
298	Choren_v00_mik.OX359201.1G980	NA	chrOX359201.1	+	6768211	6768229	6768015	6768141	6768286	6768379	298	0,75,120,43,48,146,119,94	0,1,0,0,0,0,0,0	49,44,126,14,14	0,0,0,0,0	167	149	1	1	NA,0.985,1.0,1.0,1.0,1.0,1.0,1.0	1.0,1.0,1.0,1.0,1.0	-0.002	SE
299	Choren_v00_mik.OX359201.1G980	NA	chrOX359201.1	+	6772873	6772915	6772575	6772815	6773030	6773132	299	2.74294e+24	0,2,12,2,5,1,0,0	891,461,494,82,64	2,1,8,0,1	191	149	1	1	1.0,0.994,0.966,0.996,0.988,0.999,1.0,1.0	0.997,0.997,0.98,1.0,0.98	0.002	SE
300	Choren_v00_mik.OX359201.1G980	NA	chrOX359201.1	+	6773570	6773732	6773283	6773418	6773796	6774053	300	2.86441e+28	0,0,1,0,2,2,0,0	1.42055e+16	0,0,0,0,0	298	149	1	1	1.0,1.0,0.998,1.0,0.998,0.999,1.0,1.0	1.0,1.0,1.0,1.0,1.0	-0.001	SE
301	Choren_v00_mik.OX359201.1G982	NA	chrOX359201.1	-	6754261	6754300	6754082	6754199	6754688	6754722	301	2,68,73,29,17,14,10,7	0,0,0,0,0,0,0,0	122,47,24,9,27	1,0,0,0,0	188	149	1	1	1.0,1.0,1.0,1.0,1.0,1.0,1.0,1.0	0.99,1.0,1.0,1.0,1.0	0.002	SE
302	Choren_v00_mik.OX359201.1G976	NA	chrOX359201.1	+	6725373	6725441	6725154	6725313	6725499	6725612	302	2,28,278,84,107,35,50,35	0,1,0,0,0,0,0,0	150,13,104,104,39	0,0,0,0,0	217	149	1	1	1.0,0.951,1.0,1.0,1.0,1.0,1.0,1.0	1.0,1.0,1.0,1.0,1.0	-0.006	SE
304	Choren_v00_mik.OX359201.1G963	NA	chrOX359201.1	+	6712228	6712312	6711835	6711970	6712416	6712473	304	7.16882e+21	0,1,1,0,0,0,0,0	247,77,449,408,453	0,0,0,0,0	233	149	1	1	1.0,0.991,0.998,1.0,1.0,1.0,1.0,1.0	1.0,1.0,1.0,1.0,1.0	-0.001	SE
305	Choren_v00_mik.OX359201.1G972	NA	chrOX359201.1	-	6692306	6692398	6691968	6692026	6692464	6692522	305	0,72,844,61,189,85,42,52	0,1,0,0,0,0,0,0	50,8,34,54,331	0,0,10,0,1	241	149	1	1	NA,0.978,1.0,1.0,1.0,1.0,1.0,1.0	1.0,1.0,0.678,1.0,0.995	0.062	SE
306	Choren_v00_mik.OX359201.1G969	NA	chrOX359201.1	-	6681889	6682007	6681659	6681761	6682203	6682276	306	5.29729e+21	0,0,4,0,0,2,0,2	315,56,408,182,128	0,0,0,1,4	267	149	1	1	1.0,1.0,0.976,1.0,1.0,0.986,1.0,0.983	1.0,1.0,1.0,0.99,0.947	0.006	SE
307	Choren_v00_mik.OX359201.1G969	NA	chrOX359201.1	-	6684702	6684773	6684524	6684589	6684877	6684974	307	2,187,609,80,116,126,170,129	0,0,5,0,0,0,0,1	95,58,244,159,195	0,0,0,0,1	220	149	1	1	1.0,1.0,0.988,1.0,1.0,1.0,1.0,0.989	1.0,1.0,1.0,1.0,0.992	-0.001	SE
308	Choren_v00_mik.OX359201.1G968	NA	chrOX359201.1	-	6678403	6678453	6678283	6678347	6678634	6678754	308	2.71245e+27	0,0,0,1,0,0,0,0	608528453898391	0,0,0,0,0	199	149	1	1	1.0,1.0,1.0,0.998,1.0,1.0,1.0,1.0	1.0,1.0,1.0,1.0,1.0	0	SE
309	Choren_v00_mik.OX359201.1G967	NA	chrOX359201.1	-	6671612	6671679	6671395	6671455	6671734	6671815	309	4.27667e+21	0,2,1,0,0,0,0,0	246112569391570	0,0,0,0,0	216	149	1	1	1.0,0.99,0.998,1.0,1.0,1.0,1.0,1.0	1.0,1.0,1.0,1.0,1.0	-0.002	SE
310	Choren_v00_mik.OX359201.1G967	NA	chrOX359201.1	-	6671734	6671815	6671612	6671679	6671896	6671917	310	6.27683e+21	0,0,0,3,0,0,2,0	288155611337644	0,0,0,2,0	230	149	1	1	1.0,1.0,1.0,0.969,1.0,1.0,0.994,1.0	1.0,1.0,1.0,0.991,1.0	-0.003	SE
311	Choren_v00_mik.OX359201.1G954	NA	chrOX359201.1	+	6667158	6667314	6666841	6666964	6667483	6667636	311	1,144,885,82,288,94,4,117	0,0,0,0,0,0,0,0	175,46,223,155,105	0,0,0,6,0	298	149	1	1	1.0,1.0,1.0,1.0,1.0,1.0,1.0,1.0	1.0,1.0,1.0,0.928,1.0	0.014	SE
312	Choren_v00_mik.OX359201.1G944	NA	chrOX359201.1	+	6617333	6617470	6616628	6616759	6618381	6618464	312	2,74,239,47,143,41,130,110	0,0,2,0,0,0,0,0	155,32,2239,911,1939	0,0,12,0,2	286	149	1	1	1.0,1.0,0.984,1.0,1.0,1.0,1.0,1.0	1.0,1.0,0.99,1.0,0.998	0	SE
313	Choren_v00_mik.OX359201.1G942	NA	chrOX359201.1	+	6603468	6603617	6603341	6603411	6603728	6603863	313	0,25,270,13,54,47,51,50	0,3,10,3,2,0,4,1	52,26,156,170,67	0,2,4,6,0	298	149	1	1	NA,0.806,0.931,0.684,0.931,1.0,0.864,0.962	1.0,0.867,0.951,0.934,1.0	-0.068	SE
314	Choren_v00_mik.OX359201.1G938	NA	chrOX359201.1	+	6586509	6586599	6586279	6586384	6586851	6586952	314	0,146,861,135,212,168,170,119	0,0,2,0,0,0,0,0	140,59,234,112,72	0,0,0,0,0	239	149	1	1	NA,1.0,0.996,1.0,1.0,1.0,1.0,1.0	1.0,1.0,1.0,1.0,1.0	-0.001	SE
315	Choren_v00_mik.OX359201.1G938	NA	chrOX359201.1	+	6587525	6587558	6587176	6587230	6588447	6588702	315	1,177,983,59,220,118,250,25	0,0,0,0,0,1,0,0	137,57,297,118,62	0,0,0,0,0	182	149	1	1	1.0,1.0,1.0,1.0,1.0,0.99,1.0,1.0	1.0,1.0,1.0,1.0,1.0	-0.001	SE
316	Choren_v00_mik.OX359201.1G933	NA	chrOX359201.1	-	6544360	6544418	6543925	6544200	6545009	6545072	316	0,113,4,61,0,48,32,0	0,2,0,0,0,0,0,0	43,0,0,58,30	0,0,0,6,4	207	149	1	1	NA,0.976,1.0,1.0,NA,1.0,1.0,NA	1.0,NA,NA,0.874,0.844	0.089	SE
317	Choren_v00_mik.OX359201.1G933	NA	chrOX359201.1	-	6544360	6544418	6543925	6544203	6545009	6545072	317	0,170,4,58,0,46,24,0	0,0,0,0,0,1,0,0	70,0,0,66,33	0,0,0,0,0	207	149	1	1	NA,1.0,1.0,1.0,NA,0.971,1.0,NA	1.0,NA,NA,1.0,1.0	-0.006	SE
318	Choren_v00_mik.OX359201.1G926	NA	chrOX359201.1	+	6532445	6532543	6532245	6532338	6532845	6533045	318	0,63,731,101,137,142,145,60	0,0,4,0,0,0,0,0	160,66,3173,924,2346	0,0,8,0,0	247	149	1	1	NA,1.0,0.991,1.0,1.0,1.0,1.0,1.0	1.0,1.0,0.996,1.0,1.0	0	SE
319	Choren_v00_mik.OX359201.1G926	NA	chrOX359201.1	+	6533553	6533656	6533404	6533488	6533856	6533934	319	1.13466e+21	0,0,0,0,0,0,0,0	169,56,2953,1357,3263	0,0,0,0,1	252	149	1	1	1.0,1.0,1.0,1.0,1.0,1.0,1.0,1.0	1.0,1.0,1.0,1.0,0.999	0	SE
320	Choren_v00_mik.OX359201.1G926	NA	chrOX359201.1	+	6534465	6534555	6533996	6534145	6534953	6535064	320	2,14,158,59,26,47,163,80	0,0,0,0,0,0,0,0	88,25,1058,502,1317	0,0,4,0,0	239	149	1	1	1.0,1.0,1.0,1.0,1.0,1.0,1.0,1.0	1.0,1.0,0.994,1.0,1.0	0.001	SE
321	Choren_v00_mik.OX359201.1G925	NA	chrOX359201.1	+	6525233	6525496	6524802	6525147	6525647	6526030	321	0,160,1568,115,389,122,37,101	0,0,3,0,0,0,0,0	10,8,201,310,403	0,0,0,0,0	298	149	1	1	NA,1.0,0.996,1.0,1.0,1.0,1.0,1.0	1.0,1.0,1.0,1.0,1.0	-0.001	SE
322	Choren_v00_mik.OX359201.1G924	NA	chrOX359201.1	+	6505226	6505456	6504992	6505083	6505666	6505751	322	3.11519e+29	0,0,1,0,0,0,0,0	1.56842e+18	0,0,0,0,0	298	149	1	1	1.0,1.0,1.0,1.0,1.0,1.0,1.0,1.0	1.0,1.0,1.0,1.0,1.0	0	SE
323	Choren_v00_mik.OX359201.1G921	NA	chrOX359201.1	+	6470045	6470109	6469898	6469978	6470169	6470331	323	6,74,249,67,50,97,79,51	0,0,0,0,0,0,0,0	105,54,186,128,186	0,0,0,0,4	213	149	1	1	1.0,1.0,1.0,1.0,1.0,1.0,1.0,1.0	1.0,1.0,1.0,1.0,0.97	0.006	SE
325	Choren_v00_mik.OX359201.1G921	NA	chrOX359201.1	+	6470558	6470626	6470169	6470331	6470835	6470920	325	0,6,11,4,3,5,9,6	0,0,1,0,0,0,0,0	8,0,18,19,17	0,0,0,1,0	217	149	1	1	NA,1.0,0.883,1.0,1.0,1.0,1.0,1.0	1.0,NA,1.0,0.929,1.0	0.001	SE
326	Choren_v00_mik.OX359201.1G921	NA	chrOX359201.1	+	6470706	6470780	6470558	6470626	6470835	6470920	326	2,70,196,231,101,24,214,55	0,0,0,0,0,0,0,0	47,17,308,191,81	0,0,0,2,0	223	149	1	1	1.0,1.0,1.0,1.0,1.0,1.0,1.0,1.0	1.0,1.0,1.0,0.985,1.0	0.003	SE
327	Choren_v00_mik.OX359201.1G921	NA	chrOX359201.1	+	6470835	6470920	6470169	6470331	6471161	6471295	327	0,9,3,37,20,0,44,6	0,0,0,0,0,0,1,0	0,2,57,31,10	0,0,0,0,0	234	149	1	1	NA,1.0,1.0,1.0,1.0,NA,0.966,1.0	NA,1.0,1.0,1.0,1.0	-0.006	SE
328	Choren_v00_mik.OX359201.1G918	NA	chrOX359201.1	-	6444152	6444271	6443702	6443775	6444819	6445108	328	0,105,408,142,248,97,35,98	0,4,0,0,1,0,1,0	59,54,272,128,203	0,0,1,1,2	268	149	1	1	NA,0.936,1.0,1.0,0.993,1.0,0.951,1.0	1.0,1.0,0.993,0.986,0.983	-0.01	SE
329	Choren_v00_mik.OX359201.1G918	NA	chrOX359201.1	-	6444819	6445108	6443702	6443775	6445170	6445320	329	0,101,443,87,185,70,114,39	0,0,0,0,0,0,0,0	59,31,163,75,216	0,0,0,0,1	298	149	1	1	NA,1.0,1.0,1.0,1.0,1.0,1.0,1.0	1.0,1.0,1.0,1.0,0.991	0.002	SE
331	Choren_v00_mik.OX359201.1G914	NA	chrOX359201.1	-	6424502	6424650	6424113	6424335	6424713	6424799	331	3.51649e+26	0,0,0,2,0,0,0,0	9.17328e+17	2,0,0,0,0	297	149	1	1	1.0,1.0,1.0,0.998,1.0,1.0,1.0,1.0	0.996,1.0,1.0,1.0,1.0	0.001	SE
332	Choren_v00_mik.OX359201.1G904	NA	chrOX359201.1	-	6395092	6395203	6394834	6394949	6395348	6395452	332	6.56018e+22	0,3,0,0,0,1,0,2	3842316811678240	4,0,0,0,0	260	149	1	1	1.0,0.991,1.0,1.0,1.0,0.995,1.0,0.99	0.982,1.0,1.0,1.0,1.0	0.001	SE
333	Choren_v00_mik.OX359201.1G895	NA	chrOX359201.1	+	6375927	6375994	6375668	6375824	6376067	6376162	333	0,113,566,121,229,100,195,169	0,0,1,1,0,1,2,6	144,64,437,381,317	0,1,4,3,4	216	149	1	1	NA,1.0,0.997,0.988,1.0,0.986,0.985,0.951	1.0,0.978,0.987,0.989,0.982	0	SE
334	Choren_v00_mik.OX359201.1G890	NA	chrOX359201.1	-	6350654	6350719	6350371	6350442	6350773	6350921	334	7,538,1154,411,25,504,203,333	0,0,1,0,0,0,0,0	98,103,167,244,96	0,0,0,0,0	214	149	1	1	1.0,1.0,0.999,1.0,1.0,1.0,1.0,1.0	1.0,1.0,1.0,1.0,1.0	0	SE
335	Choren_v00_mik.OX359201.1G890	NA	chrOX359201.1	-	6353066	6353212	6352796	6352951	6353695	6353705	335	0,170,369,89,91,100,93,132	0,0,3,0,1,0,0,0	87,59,49,83,44	0,0,0,0,0	295	149	1	1	NA,1.0,0.984,1.0,0.979,1.0,1.0,1.0	1.0,1.0,1.0,1.0,1.0	-0.005	SE
336	Choren_v00_mik.OX359201.1G889	NA	chrOX359201.1	-	6341203	6341335	6340619	6340718	6341586	6341721	336	9.16048e+21	0,0,0,1,0,0,0,3	276,39,79,120,31	1,0,0,1,0	281	149	1	1	1.0,1.0,1.0,0.992,1.0,1.0,1.0,0.976	0.993,1.0,1.0,0.985,1.0	0	SE
337	Choren_v00_mik.OX359201.1G889	NA	chrOX359201.1	-	6344027	6344105	6343750	6343838	6344214	6344320	337	2,77,318,52,62,39,73,63	0,0,0,6,0,0,0,0	102,15,51,58,29	0,0,0,0,0	227	149	1	1	1.0,1.0,1.0,0.85,1.0,1.0,1.0,1.0	1.0,1.0,1.0,1.0,1.0	-0.019	SE
338	Choren_v00_mik.OX359201.1G884	NA	chrOX359201.1	-	6300648	6300665	6300156	6300251	6300720	6300822	338	0,0,0,0,0,0,0,0	0,10,7,16,10,2,7,4	0,0,2,0,1	17,9,96,42,84	166	149	1	1	NA,0.0,0.0,0.0,0.0,0.0,0.0,0.0	0.0,0.0,0.018,0.0,0.011	-0.006	SE
339	Choren_v00_mik.OX359201.1G864	NA	chrOX359201.1	+	6247360	6247454	6247138	6247221	6247609	6247671	339	1.78982e+25	0,0,0,0,1,0,0,0	6832374071019170	0,0,0,3,0	243	149	1	1	1.0,1.0,1.0,1.0,0.998,1.0,1.0,1.0	1.0,1.0,1.0,0.995,1.0	0.001	SE
340	Choren_v00_mik.OX359201.1G872	NA	chrOX359201.1	-	6237926	6238004	6237609	6237696	6238075	6238153	340	0,35,110,24,47,16,54,11	0,0,0,0,0,0,0,0	56,24,51,78,54	0,0,0,0,5	227	149	1	1	NA,1.0,1.0,1.0,1.0,1.0,1.0,1.0	1.0,1.0,1.0,1.0,0.876	0.025	SE
341	Choren_v00_mik.OX359201.1G860	NA	chrOX359201.1	+	6198666	6198738	6198466	6198600	6199110	6199217	341	0,17,97,18,28,14,13,18	0,1,1,0,0,0,0,0	15,9,138,58,161	0,0,2,0,5	221	149	1	1	NA,0.92,0.985,1.0,1.0,1.0,1.0,1.0	1.0,1.0,0.979,1.0,0.956	-0.001	SE
342	Choren_v00_mik.OX359201.1G860	NA	chrOX359201.1	+	6204362	6204407	6203588	6203704	6205956	6206037	342	0,3,111,18,16,8,27,22	0,1,43,0,3,0,0,0	26,8,222,101,224	0,0,1,2,6	194	149	1	1	NA,0.697,0.665,1.0,0.804,1.0,1.0,1.0	1.0,1.0,0.994,0.975,0.966	-0.106	SE
343	Choren_v00_mik.OX359201.1G856	NA	chrOX359201.1	-	6167040	6167097	6166576	6166896	6167183	6167327	343	9.35322e+22	0,0,0,0,0,0,0,0	566,98,422,394,217	0,0,1,0,0	206	149	1	1	1.0,1.0,1.0,1.0,1.0,1.0,1.0,1.0	1.0,1.0,0.997,1.0,1.0	0.001	SE
344	Choren_v00_mik.OX359201.1G856	NA	chrOX359201.1	-	6167547	6167674	6167183	6167327	6168387	6168497	344	1.44833e+23	0,0,1,0,0,0,0,0	653141551683226	0,0,0,0,0	276	149	1	1	1.0,1.0,0.999,1.0,1.0,1.0,1.0,1.0	1.0,1.0,1.0,1.0,1.0	0	SE
345	Choren_v00_mik.OX359201.1G850	NA	chrOX359201.1	-	6140456	6140563	6140185	6140386	6140627	6140858	345	0,140,305,65,79,90,155,141	0,0,0,0,0,0,0,3	54,31,51,173,13	0,0,0,0,0	256	149	1	1	NA,1.0,1.0,1.0,1.0,1.0,1.0,0.965	1.0,1.0,1.0,1.0,1.0	-0.005	SE
346	Choren_v00_mik.OX359201.1G840	NA	chrOX359201.1	+	6095594	6095685	6095117	6095291	6096289	6096360	346	4.12252e+21	0,0,0,0,0,0,0,0	166,62,170,283,87	0,0,0,1,0	240	149	1	1	1.0,1.0,1.0,1.0,1.0,1.0,1.0,1.0	1.0,1.0,1.0,0.994,1.0	0.001	SE
347	Choren_v00_mik.OX359201.1G827	NA	chrOX359201.1	+	6046560	6046613	6046190	6046268	6046673	6046793	347	1.28662e+23	0,0,1,1,0,0,0,0	3.95324e+16	0,0,0,1,1	202	149	1	1	1.0,1.0,0.999,0.998,1.0,1.0,1.0,1.0	1.0,1.0,1.0,0.998,0.999	0	SE
348	Choren_v00_mik.OX359201.1G827	NA	chrOX359201.1	+	6047507	6047603	6046967	6047031	6047665	6047732	348	4.79626e+23	0,0,0,0,0,0,0,0	6.25231e+16	1,0,0,0,2	245	149	1	1	1.0,1.0,1.0,1.0,1.0,1.0,1.0,1.0	0.997,1.0,1.0,1.0,0.997	0.001	SE
349	Choren_v00_mik.OX359201.1G816	NA	chrOX359201.1	+	5984547	5984734	5984138	5984295	5984923	5985126	349	3.48884e+21	0,1,0,0,0,0,0,0	25,86,393,813,338	0,0,0,0,0	298	149	1	1	1.0,0.996,1.0,1.0,1.0,1.0,1.0,1.0	1.0,1.0,1.0,1.0,1.0	0	SE
350	Choren_v00_mik.OX359201.1G820	NA	chrOX359201.1	-	5975386	5975555	5970938	5971249	5977024	5977157	350	1.45131e+23	0,0,0,0,0,0,2,0	650159542505233	0,0,0,0,0	298	149	1	1	1.0,1.0,1.0,1.0,1.0,1.0,0.996,1.0	1.0,1.0,1.0,1.0,1.0	0	SE
351	Choren_v00_mik.OX359201.1G820	NA	chrOX359201.1	-	5975895	5976036	5975386	5975555	5977024	5977157	351	4.21251e+29	0,0,0,1,2,0,0,0	1.54142e+17	0,0,3,0,0	290	149	1	1	1.0,1.0,1.0,0.999,0.997,1.0,1.0,1.0	1.0,1.0,0.996,1.0,1.0	0	SE
352	Choren_v00_mik.OX359201.1G820	NA	chrOX359201.1	-	5978580	5978709	5978172	5978319	5979018	5979123	352	8.4812e+22	0,0,0,0,0,0,0,0	633180637811334	0,0,1,0,0	278	149	1	1	1.0,1.0,1.0,1.0,1.0,1.0,1.0,1.0	1.0,1.0,0.997,1.0,1.0	0.001	SE
353	Choren_v00_mik.OX359201.1G819	NA	chrOX359201.1	-	5963056	5963228	5961794	5962505	5963442	5964944	353	4.60646e+22	0,3,0,0,0,0,0,0	256114465330526	0,0,0,0,0	298	149	1	1	1.0,0.99,1.0,1.0,1.0,1.0,1.0,1.0	1.0,1.0,1.0,1.0,1.0	-0.001	SE
354	Choren_v00_mik.OX359201.1G819	NA	chrOX359201.1	-	5965548	5965654	5965219	5965247	5966455	5966603	354	0,179,2452,87,334,219,105,94	0,0,1,0,0,0,0,0	65,41,436,150,417	0,0,0,0,0	255	149	1	1	NA,1.0,0.999,1.0,1.0,1.0,1.0,1.0	1.0,1.0,1.0,1.0,1.0	0	SE
355	Choren_v00_mik.OX359201.1G801	NA	chrOX359201.1	+	5918417	5918514	5916867	5918277	5918663	5918820	355	2,88,291,54,138,94,121,115	0,0,0,0,0,0,0,0	99,45,156,202,132	0,0,2,1,0	246	149	1	1	1.0,1.0,1.0,1.0,1.0,1.0,1.0,1.0	1.0,1.0,0.979,0.992,1.0	0.006	SE
356	Choren_v00_mik.OX359201.1G805	NA	chrOX359201.1	-	5902853	5902971	5902553	5902602	5903699	5903739	356	2,124,657,86,143,112,134,97	0,0,0,0,0,0,0,0	72,44,319,137,236	0,0,0,0,1	267	149	1	1	1.0,1.0,1.0,1.0,1.0,1.0,1.0,1.0	1.0,1.0,1.0,1.0,0.992	0.002	SE
357	Choren_v00_mik.OX359201.1G805	NA	chrOX359201.1	-	5904968	5905064	5904272	5904505	5905723	5905781	357	0,110,512,92,205,136,110,127	0,0,0,0,0,1,0,0	108,31,215,170,333	0,0,3,0,0	245	149	1	1	NA,1.0,1.0,1.0,1.0,0.988,1.0,1.0	1.0,1.0,0.978,1.0,1.0	0.003	SE
358	Choren_v00_mik.OX359201.1G891	NA	chrOX359201.1	+	6357365	6357434	6356183	6356236	6357600	6357660	358	0,95,403,76,55,123,90,77	0,0,2,0,0,0,0,0	55,32,928,425,872	0,0,1,0,0	218	149	1	1	NA,1.0,0.993,1.0,1.0,1.0,1.0,1.0	1.0,1.0,0.998,1.0,1.0	-0.001	SE
359	Choren_v00_mik.OX359201.1G891	NA	chrOX359201.1	+	6358517	6358617	6356183	6356236	6359095	6359239	359	0,2,0,0,0,0,0,0	0,0,0,0,0,0,0,0	0,0,0,0,1	0,0,5,0,0	249	149	1	1	NA,1.0,NA,NA,NA,NA,NA,NA	NA,NA,0.0,NA,1.0	0.5	SE
360	Choren_v00_mik.OX359201.1G891	NA	chrOX359201.1	+	6358682	6358803	6358517	6358617	6359095	6359239	360	5.16868e+21	0,2,0,0,0,0,0,0	75,44,1171,522,1277	0,0,0,0,1	270	149	1	1	1.0,0.979,1.0,1.0,1.0,1.0,1.0,1.0	1.0,1.0,1.0,1.0,0.999	-0.002	SE
361	Choren_v00_mik.OX359201.1G891	NA	chrOX359201.1	+	6360148	6360266	6359947	6360064	6360465	6360590	361	3.2099e+21	0,0,1,0,0,0,0,0	229,63,1553,741,1165	0,0,0,0,0	267	149	1	1	1.0,1.0,0.998,1.0,1.0,1.0,1.0,1.0	1.0,1.0,1.0,1.0,1.0	0	SE
362	Choren_v00_mik.OX359201.1G796	NA	chrOX359201.1	-	5869238	5869244	5869117	5869173	5869330	5869571	362	0,63,236,103,86,98,143,53	0,0,0,0,0,0,0,0	54,21,132,79,95	0,0,2,0,0	155	149	1	1	NA,1.0,1.0,1.0,1.0,1.0,1.0,1.0	1.0,1.0,0.984,1.0,1.0	0.003	SE
363	Choren_v00_mik.OX359201.1G782	NA	chrOX359201.1	+	5832846	5832951	5832426	5832498	5833150	5833222	363	1,21,105,21,17,4,43,9	1,2,7,9,11,11,26,0	33,0,9,24,4	1,0,4,7,0	254	149	1	1	0.37,0.86,0.898,0.578,0.476,0.176,0.492,1.0	0.951,NA,0.569,0.668,1.0	-0.191	SE
364	Choren_v00_mik.OX359201.1G782	NA	chrOX359201.1	+	5833323	5833392	5833150	5833222	5833474	5833539	364	4,49,207,45,50,45,63,32	0,0,0,0,0,0,0,0	40,10,30,35,10	0,0,0,3,0	218	149	1	1	1.0,1.0,1.0,1.0,1.0,1.0,1.0,1.0	1.0,1.0,1.0,0.889,1.0	0.022	SE
365	Choren_v00_mik.OX359202.1G873	NA	chrOX359202.1	+	6209427	6209477	6208989	6209138	6210316	6210440	365	0,100,199,27,53,62,45,107	0,0,0,0,0,0,0,0	30,38,52,65,11	0,0,0,0,2	199	149	1	1	NA,1.0,1.0,1.0,1.0,1.0,1.0,1.0	1.0,1.0,1.0,1.0,0.805	0.039	SE
366	Choren_v00_mik.OX359202.1G873	NA	chrOX359202.1	+	6210316	6210440	6209427	6209477	6211050	6211099	366	0,143,284,66,72,121,102,121	0,0,0,0,0,1,0,0	66,35,61,54,28	0,0,0,0,0	273	149	1	1	NA,1.0,1.0,1.0,1.0,0.985,1.0,1.0	1.0,1.0,1.0,1.0,1.0	-0.002	SE
367	Choren_v00_mik.OX359201.1G771	NA	chrOX359201.1	+	5760865	5760973	5760329	5760399	5761392	5761461	367	2,151,310,48,115,115,36,64	0,0,0,0,0,0,0,0	76,42,268,84,182	1,0,0,0,0	257	149	1	1	1.0,1.0,1.0,1.0,1.0,1.0,1.0,1.0	0.978,1.0,1.0,1.0,1.0	0.004	SE
368	Choren_v00_mik.OX359201.1G772	NA	chrOX359201.1	-	5754856	5754918	5754299	5754402	5755083	5755161	368	0,93,137,66,98,43,46,31	0,1,0,1,0,0,0,0	56,34,109,191,29	0,0,1,0,0	211	149	1	1	NA,0.985,1.0,0.979,1.0,1.0,1.0,1.0	1.0,1.0,0.987,1.0,1.0	-0.003	SE
369	Choren_v00_mik.OX359201.1G772	NA	chrOX359201.1	-	5755969	5756089	5755750	5755804	5756151	5756184	369	4,121,177,88,128,70,115,116	0,4,0,0,0,0,0,0	103,37,169,229,83	0,0,0,0,0	269	149	1	1	1.0,0.944,1.0,1.0,1.0,1.0,1.0,1.0	1.0,1.0,1.0,1.0,1.0	-0.007	SE
370	Choren_v00_mik.OX359202.1G562	NA	chrOX359202.1	-	4108868	4109717	4108356	4108493	4110263	4110356	370	1,174,1031,68,249,185,161,174	0,0,0,0,0,0,0,0	76,58,351,436,191	0,0,2,0,0	298	149	1	1	1.0,1.0,1.0,1.0,1.0,1.0,1.0,1.0	1.0,1.0,0.989,1.0,1.0	0.002	SE
371	Choren_v00_mik.OX359201.1G763	NA	chrOX359201.1	+	5646027	5646342	5645539	5645698	5646563	5646723	371	6.32263e+21	0,0,0,0,0,0,2,0	151,82,174,302,139	0,0,0,0,0	298	149	1	1	1.0,1.0,1.0,1.0,1.0,1.0,0.992,1.0	1.0,1.0,1.0,1.0,1.0	-0.001	SE
372	Choren_v00_mik.OX359201.1G762	NA	chrOX359201.1	+	5626973	5627060	5626670	5626736	5627653	5627753	372	3,85,446,44,120,48,46,74	0,0,0,0,0,0,0,0	66,21,343,230,392	0,0,0,0,1	236	149	1	1	1.0,1.0,1.0,1.0,1.0,1.0,1.0,1.0	1.0,1.0,1.0,1.0,0.996	0.001	SE
373	Choren_v00_mik.OX359201.1G761	NA	chrOX359201.1	-	5612595	5612690	5612107	5612226	5613316	5613435	373	6,0,24,38,88,1,255,39	0,0,0,0,0,0,1,0	145,50,85,159,5	0,2,0,1,0	244	149	1	1	1.0,NA,1.0,1.0,1.0,1.0,0.994,1.0	1.0,0.939,1.0,0.99,1.0	0.013	SE
374	Choren_v00_mik.OX359201.1G761	NA	chrOX359201.1	-	5614253	5614361	5613762	5613834	5614530	5614578	374	0,48,160,60,53,72,78,47	0,0,0,0,0,4,0,0	64,17,48,100,30	0,0,2,2,7	257	149	1	1	NA,1.0,1.0,1.0,1.0,0.913,1.0,1.0	1.0,1.0,0.933,0.967,0.713	0.065	SE
375	Choren_v00_mik.OX359201.1G761	NA	chrOX359201.1	-	5615600	5615718	5614871	5614993	5615981	5616073	375	0,17,28,2,11,11,13,14	0,0,2,0,0,0,0,0	6,5,6,11,8	0,0,0,0,0	267	149	1	1	NA,1.0,0.887,1.0,1.0,1.0,1.0,1.0	1.0,1.0,1.0,1.0,1.0	-0.016	SE
377	Choren_v00_mik.OX359201.1G754	NA	chrOX359201.1	-	5592610	5592726	5592017	5592156	5592992	5593301	377	2,105,169,64,68,74,44,58	0,0,0,0,0,0,0,2	24,12,220,125,177	0,0,0,0,0	265	149	1	1	1.0,1.0,1.0,1.0,1.0,1.0,1.0,0.942	1.0,1.0,1.0,1.0,1.0	-0.007	SE
378	Choren_v00_mik.OX359201.1G742	NA	chrOX359201.1	-	5512453	5512504	5512282	5512345	5512571	5512708	378	0,56,203,0,86,115,305,59	0,0,1,0,0,0,0,0	144,21,118,35,3	0,0,0,0,0	200	149	1	1	NA,1.0,0.993,NA,1.0,1.0,1.0,1.0	1.0,1.0,1.0,1.0,1.0	-0.001	SE
379	Choren_v00_mik.OX359201.1G740	NA	chrOX359201.1	-	5501367	5501396	5500901	5501262	5501749	5501938	379	0,3,8,4,2,23,527,339	0,0,0,0,0,0,3,0	357,135,242,4,4	0,0,0,0,0	178	149	1	1	NA,1.0,1.0,1.0,1.0,1.0,0.993,1.0	1.0,1.0,1.0,1.0,1.0	-0.001	SE
380	Choren_v00_mik.OX359201.1G737	NA	chrOX359201.1	+	5498789	5498879	5498365	5498536	5499002	5499104	380	4.52441e+28	0,0,0,0,0,0,0,0	1.89371e+17	0,0,0,2,0	239	149	1	1	1.0,1.0,1.0,1.0,1.0,1.0,1.0,1.0	1.0,1.0,1.0,0.998,1.0	0	SE
381	Choren_v00_mik.OX359201.1G729	NA	chrOX359201.1	+	5445347	5445433	5443519	5443581	5445732	5445897	381	1.22328e+22	0,0,1,0,0,0,0,0	267,124,162,418,42	0,0,0,0,0	235	149	1	1	1.0,1.0,0.998,1.0,1.0,1.0,1.0,1.0	1.0,1.0,1.0,1.0,1.0	0	SE
382	Choren_v00_mik.OX359201.1G729	NA	chrOX359201.1	+	5448686	5448812	5447580	5447749	5449518	5449652	382	1.94992e+23	0,0,0,0,0,0,0,0	443271470809126	0,0,2,0,0	275	149	1	1	1.0,1.0,1.0,1.0,1.0,1.0,1.0,1.0	1.0,1.0,0.992,1.0,1.0	0.002	SE
383	Choren_v00_mik.OX359201.1G726	NA	chrOX359201.1	+	5430653	5430840	5429874	5430011	5431482	5431563	383	1.83215e+22	0,0,14,0,0,0,0,0	283141565828588	6,0,2,0,0	298	149	1	1	1.0,1.0,0.981,1.0,1.0,1.0,1.0,1.0	0.959,1.0,0.993,1.0,1.0	0.007	SE
384	Choren_v00_mik.OX359201.1G726	NA	chrOX359201.1	+	5432210	5432305	5431979	5432089	5432666	5432743	384	4.57695e+21	0,0,6,0,0,0,0,0	232100277533487	0,0,0,0,0	244	149	1	1	1.0,1.0,0.99,1.0,1.0,1.0,1.0,1.0	1.0,1.0,1.0,1.0,1.0	-0.001	SE
385	Choren_v00_mik.OX359201.1G727	NA	chrOX359201.1	-	5418059	5418292	5417942	5417988	5418735	5418811	385	4,93,511,175,161,143,237,141	0,0,0,0,0,0,0,0	136,65,193,170,99	0,0,0,1,0	298	149	1	1	1.0,1.0,1.0,1.0,1.0,1.0,1.0,1.0	1.0,1.0,1.0,0.988,1.0	0.002	SE
386	Choren_v00_mik.OX359201.1G727	NA	chrOX359201.1	-	5418735	5418811	5417942	5417988	5419186	5419325	386	0,22,95,26,41,24,21,50	0,0,0,0,0,0,0,1	28,4,39,34,29	0,0,0,0,0	225	149	1	1	NA,1.0,1.0,1.0,1.0,1.0,1.0,0.971	1.0,1.0,1.0,1.0,1.0	-0.004	SE
387	Choren_v00_mik.OX359201.1G727	NA	chrOX359201.1	-	5419460	5419601	5419186	5419325	5420175	5420348	387	0,48,70,29,17,31,94,23	0,43,212,44,62,56,88,44	25,3,12,41,25	44,23,78,68,42	290	149	1	1	NA,0.364,0.145,0.253,0.123,0.221,0.354,0.212	0.226,0.063,0.073,0.237,0.234	0.072	SE
388	Choren_v00_mik.OX359201.1G727	NA	chrOX359201.1	-	5421839	5422261	5421240	5421385	5422507	5422605	388	2,140,300,66,122,133,107,43	0,0,0,0,0,0,0,0	70,33,112,129,63	1,0,0,0,0	298	149	1	1	1.0,1.0,1.0,1.0,1.0,1.0,1.0,1.0	0.972,1.0,1.0,1.0,1.0	0.006	SE
389	Choren_v00_mik.OX359201.1G727	NA	chrOX359201.1	-	5423903	5424016	5423595	5423752	5424279	5424420	389	1,53,239,73,109,63,69,67	0,0,0,0,0,0,0,0	53,12,93,102,93	0,0,0,0,2	262	149	1	1	1.0,1.0,1.0,1.0,1.0,1.0,1.0,1.0	1.0,1.0,1.0,1.0,0.964	0.007	SE
390	Choren_v00_mik.OX359201.1G719	NA	chrOX359201.1	+	5383754	5383829	5383152	5383294	5384277	5384368	390	2,9,101,13,18,14,8,20	0,0,0,0,0,0,0,0	21,5,35,42,26	0,0,0,0,3	224	149	1	1	1.0,1.0,1.0,1.0,1.0,1.0,1.0,1.0	1.0,1.0,1.0,1.0,0.852	0.03	SE
391	Choren_v00_mik.OX359201.1G719	NA	chrOX359201.1	+	5383894	5383971	5383754	5383829	5384277	5384368	391	0,5,150,48,97,8,17,17	0,0,0,0,0,0,0,0	37,3,3,113,12	0,0,0,0,1	226	149	1	1	NA,1.0,1.0,1.0,1.0,1.0,1.0,1.0	1.0,1.0,1.0,1.0,0.888	0.022	SE
392	Choren_v00_mik.OX359201.1G714	NA	chrOX359201.1	+	5340736	5340792	5340552	5340641	5340883	5341056	392	0,66,6,25,102,54,26,4	0,0,0,0,1,0,0,0	76,21,3,117,4	0,0,0,3,0	205	149	1	1	NA,1.0,1.0,1.0,0.987,1.0,1.0,1.0	1.0,1.0,1.0,0.966,1.0	0.005	SE
393	Choren_v00_mik.OX359202.1G361	NA	chrOX359202.1	-	1825801	1825857	1825205	1825302	1825914	1826014	393	0,55,134,36,62,36,31,35	0,0,0,2,6,0,2,0	49,18,41,132,45	0,0,0,2,0	205	149	1	1	NA,1.0,1.0,0.929,0.882,1.0,0.918,1.0	1.0,1.0,1.0,0.98,1.0	-0.035	SE
394	Choren_v00_mik.OX359202.1G361	NA	chrOX359202.1	-	1826171	1826268	1825914	1826014	1826674	1826723	394	0,30,39,15,27,20,18,23	0,10,3,5,4,2,4,5	13,11,37,59,16	2,1,0,14,3	246	149	1	1	NA,0.645,0.887,0.645,0.803,0.858,0.732,0.736	0.797,0.869,1.0,0.719,0.764	-0.072	SE
395	Choren_v00_mik.OX359202.1G361	NA	chrOX359202.1	-	1826674	1826723	1825914	1826014	1826787	1826817	395	0,5,3,5,4,2,4,2	0,0,3,1,0,0,0,0	2,0,0,12,0	0,0,0,3,0	198	149	1	1	NA,1.0,0.429,0.79,1.0,1.0,1.0,1.0	1.0,NA,NA,0.751,NA	0.013	SE
396	Choren_v00_mik.OX359201.1G705	NA	chrOX359201.1	-	5292500	5292618	5290747	5290858	5293213	5293310	396	6.30712e+22	0,1,0,0,0,2,9,0	213,85,328,254,237	0,0,0,0,0	267	149	1	1	1.0,0.994,1.0,1.0,1.0,0.988,0.957,1.0	1.0,1.0,1.0,1.0,1.0	-0.008	SE
397	Choren_v00_mik.OX359201.1G705	NA	chrOX359201.1	-	5293863	5293941	5293213	5293310	5294808	5294867	397	3,102,390,94,110,102,169,141	0,0,0,0,0,1,0,0	75,33,100,95,101	0,4,0,0,0	227	149	1	1	1.0,1.0,1.0,1.0,1.0,0.985,1.0,1.0	1.0,0.844,1.0,1.0,1.0	0.029	SE
398	Choren_v00_mik.OX359201.1G705	NA	chrOX359201.1	-	5294003	5294037	5293863	5293941	5294293	5294370	398	5.19648e+21	0,1,2,2,0,3,2,3	92,64,235,200,124	0,1,0,4,0	183	149	1	1	1.0,0.994,0.995,0.982,1.0,0.978,0.989,0.979	1.0,0.981,1.0,0.976,1.0	-0.002	SE
399	Choren_v00_mik.OX359201.1G705	NA	chrOX359201.1	-	5294003	5294037	5293863	5293941	5294808	5294867	399	4,55,162,46,53,51,65,66	0,2,0,0,0,0,0,0	24,23,56,55,45	0,0,0,0,0	183	149	1	1	1.0,0.957,1.0,1.0,1.0,1.0,1.0,1.0	1.0,1.0,1.0,1.0,1.0	-0.005	SE
400	Choren_v00_mik.OX359201.1G705	NA	chrOX359201.1	-	5294293	5294370	5293863	5293941	5294808	5294867	400	6,100,277,50,45,81,121,121	0,2,0,0,0,0,0,0	70,28,123,109,55	0,0,0,0,0	226	149	1	1	1.0,0.971,1.0,1.0,1.0,1.0,1.0,1.0	1.0,1.0,1.0,1.0,1.0	-0.004	SE
401	Choren_v00_mik.OX359201.1G705	NA	chrOX359201.1	-	5294293	5294370	5294003	5294037	5294808	5294867	401	7.24661e+21	0,0,5,0,0,2,0,0	138,70,308,251,128	0,0,0,0,0	226	149	1	1	1.0,1.0,0.988,1.0,1.0,0.985,1.0,1.0	1.0,1.0,1.0,1.0,1.0	-0.003	SE
402	Choren_v00_mik.OX359201.1G705	NA	chrOX359201.1	-	5294981	5295073	5294808	5294867	5295133	5295250	402	8.26966e+21	0,0,0,0,0,4,0,0	146,56,276,225,140	0,0,0,0,0	241	149	1	1	1.0,1.0,1.0,1.0,1.0,0.952,1.0,1.0	1.0,1.0,1.0,1.0,1.0	-0.006	SE
403	Choren_v00_mik.OX359201.1G704	NA	chrOX359201.1	-	5276288	5276348	5275418	5275632	5276606	5276688	403	0,108,381,123,114,121,178,111	0,4,14,0,7,1,0,2	116,37,202,130,134	0,0,6,0,3	209	149	1	1	NA,0.951,0.951,1.0,0.921,0.989,1.0,0.975	1.0,1.0,0.96,1.0,0.97	-0.016	SE
404	Choren_v00_mik.OX359201.1G704	NA	chrOX359201.1	-	5276606	5276688	5275418	5275632	5276810	5276923	404	1,39,147,54,38,49,22,24	0,0,0,0,0,0,0,0	36,14,95,64,62	0,0,4,0,0	231	149	1	1	1.0,1.0,1.0,1.0,1.0,1.0,1.0,1.0	1.0,1.0,0.939,1.0,1.0	0.012	SE
405	Choren_v00_mik.OX359201.1G697	NA	chrOX359201.1	+	5259875	5259938	5259661	5259757	5260000	5260138	405	0,37,24,14,10,24,34,22	0,2,0,0,0,0,0,4	23,25,430,173,66	0,1,12,1,4	212	149	1	1	NA,0.929,1.0,1.0,1.0,1.0,1.0,0.794	1.0,0.946,0.962,0.992,0.921	-0.004	SE
406	Choren_v00_mik.OX359201.1G697	NA	chrOX359201.1	+	5261885	5261957	5261323	5261431	5262253	5262349	406	0,74,182,21,30,27,31,39	0,0,0,0,0,0,0,0	34,21,1077,345,1017	0,0,0,0,2	221	149	1	1	NA,1.0,1.0,1.0,1.0,1.0,1.0,1.0	1.0,1.0,1.0,1.0,0.997	0.001	SE
407	Choren_v00_mik.OX359201.1G697	NA	chrOX359201.1	+	5268004	5268109	5267582	5267666	5269647	5269707	407	0,72,283,104,52,16,72,49	0,0,0,0,0,0,0,0	52,17,916,220,2324	2,0,0,0,0	254	149	1	1	NA,1.0,1.0,1.0,1.0,1.0,1.0,1.0	0.938,1.0,1.0,1.0,1.0	0.012	SE
408	Choren_v00_mik.OX359201.1G689	NA	chrOX359201.1	+	5160802	5160966	5160452	5160576	5161311	5161387	408	0,235,2529,119,367,171,179,109	0,0,0,1,0,0,0,0	181,40,837,469,1225	0,0,0,0,0	298	149	1	1	NA,1.0,1.0,0.983,1.0,1.0,1.0,1.0	1.0,1.0,1.0,1.0,1.0	-0.002	SE
409	Choren_v00_mik.OX359201.1G690	NA	chrOX359201.1	-	5145597	5145672	5141885	5142372	5152565	5152673	409	4.46219e+22	0,2,1,0,0,2,1,2	141,72,221,222,98	0,0,0,0,0	224	149	1	1	1.0,0.994,0.999,1.0,1.0,0.984,0.995,0.991	1.0,1.0,1.0,1.0,1.0	-0.005	SE
410	Choren_v00_mik.OX359201.1G679	NA	chrOX359201.1	+	5100948	5101054	5100502	5100711	5101461	5101674	410	0,48,377,23,55,12,10,14	0,0,0,0,0,0,0,0	25,1,289,217,411	0,0,0,0,1	255	149	1	1	NA,1.0,1.0,1.0,1.0,1.0,1.0,1.0	1.0,1.0,1.0,1.0,0.996	0.001	SE
411	Choren_v00_mik.OX359201.1G679	NA	chrOX359201.1	+	5105476	5105608	5103933	5104218	5108558	5108708	411	0,139,534,79,87,96,55,79	0,0,0,0,1,0,0,0	79,49,219,563,202	0,0,4,2,0	281	149	1	1	NA,1.0,1.0,1.0,0.979,1.0,1.0,1.0	1.0,1.0,0.967,0.993,1.0	0.005	SE
412	Choren_v00_mik.OX359201.1G676	NA	chrOX359201.1	+	5048158	5048280	5047783	5047874	5049303	5049442	412	0,314,1140,133,257,225,125,273	0,3,8,0,0,0,0,3	171,56,226,385,131	2,0,4,8,1	271	149	1	1	NA,0.983,0.987,1.0,1.0,1.0,1.0,0.98	0.979,1.0,0.969,0.964,0.986	0.013	SE
413	Choren_v00_mik.OX359201.1G676	NA	chrOX359201.1	+	5051040	5051131	5049920	5050028	5052123	5052260	413	4.24584e+21	0,0,0,0,0,0,0,0	195,62,214,381,164	0,1,0,0,0	240	149	1	1	1.0,1.0,1.0,1.0,1.0,1.0,1.0,1.0	1.0,0.975,1.0,1.0,1.0	0.005	SE
414	Choren_v00_mik.OX359201.1G676	NA	chrOX359201.1	+	5056809	5056968	5055649	5055729	5057320	5057427	414	0,489,878,350,416,367,422,354	0,0,6,0,0,0,0,0	347,87,324,434,185	0,0,0,0,0	298	149	1	1	NA,1.0,0.987,1.0,1.0,1.0,1.0,1.0	1.0,1.0,1.0,1.0,1.0	-0.002	SE
415	Choren_v00_mik.OX359201.1G675	NA	chrOX359201.1	+	5035543	5035628	5035363	5035484	5035773	5035885	415	2,42,152,26,15,18,40,12	0,0,0,0,0,0,0,0	12,9,30,81,5	0,2,0,0,0	234	149	1	1	1.0,1.0,1.0,1.0,1.0,1.0,1.0,1.0	1.0,0.741,1.0,1.0,1.0	0.052	SE
416	Choren_v00_mik.OX359201.1G675	NA	chrOX359201.1	+	5039798	5039898	5039657	5039742	5040019	5040130	416	4.73851e+28	0,35,15,5,0,5,3,27	1.73753e+18	23,4,3,12,1	249	149	1	1	1.0,0.985,0.997,0.994,1.0,0.995,0.998,0.974	0.978,0.987,0.999,0.995,1.0	0.001	SE
417	Choren_v00_mik.OX359201.1G675	NA	chrOX359201.1	+	5040019	5040130	5039798	5039898	5040534	5040572	417	2.5322e+29	0,0,4,0,0,2,0,0	1.71738e+19	0,0,0,0,0	260	149	1	1	1.0,1.0,0.999,1.0,1.0,0.997,1.0,1.0	1.0,1.0,1.0,1.0,1.0	0	SE
418	Choren_v00_mik.OX359201.1G671	NA	chrOX359201.1	+	5006936	5007036	5006184	5006240	5007311	5007443	418	0,29,45,21,11,31,9,22	0,0,0,0,0,0,0,1	10,8,29,10,4	0,0,0,0,0	249	149	1	1	NA,1.0,1.0,1.0,1.0,1.0,1.0,0.929	1.0,1.0,1.0,1.0,1.0	-0.01	SE
419	Choren_v00_mik.OX359201.1G641	NA	chrOX359201.1	+	4877813	4877963	4877638	4877747	4878385	4878606	419	4.51541e+27	0,0,0,0,0,0,0,4	2.16372e+16	0,0,0,0,0	298	149	1	1	1.0,1.0,1.0,1.0,1.0,1.0,1.0,0.996	1.0,1.0,1.0,1.0,1.0	0	SE
420	Choren_v00_mik.OX359201.1G642	NA	chrOX359201.1	-	4875885	4876000	4875470	4875552	4876147	4876268	420	4,87,12,207,132,237,492,127	0,0,0,0,2,21,32,10	0,48,163,5,201	0,4,11,0,17	264	149	1	1	1.0,1.0,1.0,1.0,0.974,0.864,0.897,0.878	NA,0.871,0.893,1.0,0.87	0.043	SE
421	Choren_v00_mik.OX359201.1G638	NA	chrOX359201.1	-	4858916	4859168	4854644	4854965	4861701	4861899	421	0,5,94,0,60,8,39,8	0,18,0,0,4,0,0,0	3,2,2,9,1	0,12,0,0,0	298	149	1	1	NA,0.122,1.0,NA,0.882,1.0,1.0,1.0	1.0,0.077,1.0,1.0,1.0	0.019	SE
422	Choren_v00_mik.OX359201.1G622	NA	chrOX359201.1	+	4748239	4748394	4747192	4747285	4748652	4748798	422	0,81,474,80,49,104,72,128	0,0,0,0,0,0,1,0	105,18,104,135,20	0,0,0,0,0	298	149	1	1	NA,1.0,1.0,1.0,1.0,1.0,0.973,1.0	1.0,1.0,1.0,1.0,1.0	-0.004	SE
423	Choren_v00_mik.OX359201.1G622	NA	chrOX359201.1	+	4754737	4754817	4754349	4754392	4755263	4755341	423	7,66,361,165,68,79,176,80	0,0,0,0,1,0,1,0	127,23,85,49,21	0,0,0,0,0	229	149	1	1	1.0,1.0,1.0,1.0,0.978,1.0,0.991,1.0	1.0,1.0,1.0,1.0,1.0	-0.004	SE
424	Choren_v00_mik.OX359201.1G621	NA	chrOX359201.1	-	4723672	4723717	4722865	4722985	4724589	4724710	424	4.17877e+21	0,0,0,0,1,0,0,0	138,69,114,205,79	0,0,0,0,0	194	149	1	1	1.0,1.0,1.0,1.0,0.994,1.0,1.0,1.0	1.0,1.0,1.0,1.0,1.0	-0.001	SE
425	Choren_v00_mik.OX359201.1G621	NA	chrOX359201.1	-	4723819	4723866	4723672	4723717	4724589	4724710	425	6.23816e+22	0,0,2,0,0,0,0,0	428,73,199,360,106	0,0,0,0,0	196	149	1	1	1.0,1.0,0.998,1.0,1.0,1.0,1.0,1.0	1.0,1.0,1.0,1.0,1.0	0	SE
426	Choren_v00_mik.OX359201.1G621	NA	chrOX359201.1	-	4724589	4724710	4722865	4722985	4725445	4725494	426	0,172,1301,373,368,191,248,174	0,0,0,0,0,1,0,0	256,81,191,213,115	0,0,0,0,0	270	149	1	1	NA,1.0,1.0,1.0,1.0,0.991,1.0,1.0	1.0,1.0,1.0,1.0,1.0	-0.001	SE
427	Choren_v00_mik.OX359201.1G621	NA	chrOX359201.1	-	4727850	4727972	4727498	4727577	4728682	4728795	427	8.54417e+22	0,0,2,0,4,0,3,0	423152517597382	0,0,0,0,1	271	149	1	1	1.0,1.0,0.998,1.0,0.986,1.0,0.986,1.0	1.0,1.0,1.0,1.0,0.995	-0.003	SE
428	Choren_v00_mik.OX359201.1G620	NA	chrOX359201.1	-	4716875	4717002	4714033	4714223	4718056	4718133	428	4.32418e+22	0,0,0,0,0,0,0,0	547196280228382	2,0,0,0,0	276	149	1	1	1.0,1.0,1.0,1.0,1.0,1.0,1.0,1.0	0.993,1.0,1.0,1.0,1.0	0.001	SE
429	Choren_v00_mik.OX359202.1G848	NA	chrOX359202.1	+	6075847	6075961	6075345	6075416	6076353	6076423	429	2.72769e+22	0,0,0,0,0,0,0,0	923,194,171,169,96	0,0,0,1,0	263	149	1	1	1.0,1.0,1.0,1.0,1.0,1.0,1.0,1.0	1.0,1.0,1.0,0.99,1.0	0.002	SE
430	Choren_v00_mik.OX359201.1G604	NA	chrOX359201.1	+	4652964	4653016	4652841	4652895	4653118	4653184	430	3.10233e+24	0,0,0,0,0,0,0,0	6513385001249210	0,0,0,1,0	201	149	1	1	1.0,1.0,1.0,1.0,1.0,1.0,1.0,1.0	1.0,1.0,1.0,0.999,1.0	0	SE
432	Choren_v00_mik.OX359201.1G604	NA	chrOX359201.1	+	4654707	4654786	4654589	4654638	4654861	4654893	432	6.62321e+22	0,0,8,0,0,0,0,0	412117381750148	0,0,1,6,0	228	149	1	1	1.0,1.0,0.994,1.0,1.0,1.0,1.0,1.0	1.0,1.0,0.996,0.988,1.0	0.002	SE
433	Choren_v00_mik.OX359201.1G604	NA	chrOX359201.1	+	4654707	4654786	4654589	4654653	4654861	4654893	433	1.25421e+23	0,0,0,0,0,0,0,0	402150194877109	0,1,0,0,0	228	149	1	1	1.0,1.0,1.0,1.0,1.0,1.0,1.0,1.0	1.0,0.99,1.0,1.0,1.0	0.002	SE
434	Choren_v00_mik.OX359201.1G604	NA	chrOX359201.1	+	4657469	4657544	4657243	4657325	4657973	4658116	434	2.42029e+29	0,0,35,8,0,9,13,3	1.13539e+16	4,0,1,0,0	224	149	1	1	1.0,1.0,0.987,0.991,1.0,0.988,0.992,0.996	0.995,1.0,0.996,1.0,1.0	-0.004	SE
435	Choren_v00_mik.OX359201.1G606	NA	chrOX359201.1	-	4645329	4645455	4644032	4644146	4645949	4645984	435	0,193,484,169,129,164,177,102	0,0,0,0,0,0,0,1	64,65,207,174,170	0,0,0,0,0	275	149	1	1	NA,1.0,1.0,1.0,1.0,1.0,1.0,0.982	1.0,1.0,1.0,1.0,1.0	-0.003	SE
436	Choren_v00_mik.OX359201.1G606	NA	chrOX359201.1	-	4649016	4649066	4648649	4648700	4649123	4649194	436	0,17,40,15,15,24,8,9	0,0,0,0,0,2,0,0	22,5,73,36,9	0,0,0,0,0	199	149	1	1	NA,1.0,1.0,1.0,1.0,0.9,1.0,1.0	1.0,1.0,1.0,1.0,1.0	-0.014	SE
437	Choren_v00_mik.OX359201.1G603	NA	chrOX359201.1	+	4633501	4633581	4632751	4632880	4634662	4634806	437	3.32415e+22	0,2,0,0,0,0,2,0	223,34,298,383,110	0,0,0,0,0	229	149	1	1	1.0,0.991,1.0,1.0,1.0,1.0,0.99,1.0	1.0,1.0,1.0,1.0,1.0	-0.002	SE
438	Choren_v00_mik.OX359201.1G579	NA	chrOX359201.1	+	4494697	4495234	4494446	4494534	4495352	4495530	438	0,8,7,0,2,2,1,0	0,2,0,0,0,0,0,0	3,0,159,11,232	0,0,8,16,11	298	149	1	1	NA,0.667,1.0,NA,1.0,1.0,1.0,NA	1.0,NA,0.909,0.256,0.913	0.164	SE
439	Choren_v00_mik.OX359201.1G571	NA	chrOX359201.1	-	4424971	4425094	4424728	4424848	4425703	4425826	439	5,188,995,75,166,123,68,0	0,0,2,0,0,0,0,0	84,46,167,242,120	0,0,0,0,0	272	149	1	1	1.0,1.0,0.996,1.0,1.0,1.0,1.0,NA	1.0,1.0,1.0,1.0,1.0	-0.001	SE
440	Choren_v00_mik.OX359201.1G571	NA	chrOX359201.1	-	4425215	4425338	4424971	4425094	4425459	4425582	440	7,303,635,17,35,127,116,0	0,2,0,0,0,0,0,0	104,52,30,181,17	0,4,0,2,0	272	149	1	1	1.0,0.988,1.0,1.0,1.0,1.0,1.0,NA	1.0,0.877,1.0,0.98,1.0	0.027	SE
441	Choren_v00_mik.OX359201.1G571	NA	chrOX359201.1	-	4425215	4425338	4424971	4425094	4425703	4425826	441	7,261,632,11,35,126,116,0	0,0,0,0,3,0,0,0	104,40,30,166,17	0,0,3,1,0	272	149	1	1	1.0,1.0,1.0,1.0,0.865,1.0,1.0,NA	1.0,1.0,0.846,0.989,1.0	0.014	SE
442	Choren_v00_mik.OX359201.1G571	NA	chrOX359201.1	-	4425459	4425582	4424971	4425094	4425703	4425826	442	0,71,87,2,0,15,11,0	0,0,0,0,3,0,0,0	6,12,7,39,2	0,0,3,1,0	272	149	1	1	NA,1.0,1.0,1.0,0.0,1.0,1.0,NA	1.0,1.0,0.561,0.955,1.0	-0.07	SE
443	Choren_v00_mik.OX359201.1G571	NA	chrOX359201.1	-	4425459	4425582	4425215	4425338	4425703	4425826	443	0,104,90,6,0,15,11,0	0,2,2,0,0,0,0,0	6,20,7,51,2	0,0,0,0,0	272	149	1	1	NA,0.966,0.961,1.0,NA,1.0,1.0,NA	1.0,1.0,1.0,1.0,1.0	-0.015	SE
444	Choren_v00_mik.OX359201.1G571	NA	chrOX359201.1	-	4425703	4425826	4424971	4425094	4425944	4426067	444	0,255,116,8,13,26,19,4	0,0,5,0,0,0,0,0	39,37,28,130,20	0,0,6,2,0	272	149	1	1	NA,1.0,0.927,1.0,1.0,1.0,1.0,1.0	1.0,1.0,0.719,0.973,1.0	0.051	SE
445	Choren_v00_mik.OX359201.1G571	NA	chrOX359201.1	-	4427633	4427702	4427059	4427182	4427816	4427951	445	1.11642e+24	0,0,6,0,0,0,0,0	5772441277592930	0,0,0,3,0	218	149	1	1	1.0,1.0,0.997,1.0,1.0,1.0,1.0,1.0	1.0,1.0,1.0,0.993,1.0	0.001	SE
446	Choren_v00_mik.OX359201.1G571	NA	chrOX359201.1	-	4427816	4427951	4427059	4427182	4428129	4428258	446	7.13933e+23	0,0,0,0,0,0,0,0	375159739620512	0,1,0,0,0	284	149	1	1	1.0,1.0,1.0,1.0,1.0,1.0,1.0,1.0	1.0,0.988,1.0,1.0,1.0	0.002	SE
448	Choren_v00_mik.OX359201.1G571	NA	chrOX359201.1	-	4431626	4431724	4431306	4431347	4434841	4434944	448	0,68,109,38,29,19,100,37	0,1,9,0,0,0,2,0	61,16,70,164,56	0,0,11,7,3	247	149	1	1	NA,0.976,0.88,1.0,1.0,1.0,0.968,1.0	1.0,1.0,0.793,0.934,0.918	0.046	SE
449	Choren_v00_mik.OX359201.1G571	NA	chrOX359201.1	-	4432992	4433098	4431306	4431347	4434841	4434944	449	0,62,174,47,24,65,71,69	0,1,9,0,0,0,2,0	55,21,209,312,165	0,0,11,7,3	255	149	1	1	NA,0.973,0.919,1.0,1.0,1.0,0.954,1.0	1.0,1.0,0.917,0.963,0.97	0.008	SE
451	Choren_v00_mik.OX359201.1G571	NA	chrOX359201.1	-	4448617	4448705	4443568	4443681	4453113	4453210	451	0,70,174,50,26,38,32,34	0,0,0,0,0,0,0,0	8,35,102,192,116	0,0,0,2,0	237	149	1	1	NA,1.0,1.0,1.0,1.0,1.0,1.0,1.0	1.0,1.0,1.0,0.984,1.0	0.003	SE
452	Choren_v00_mik.OX359201.1G571	NA	chrOX359201.1	-	4453113	4453210	4448617	4448705	4455151	4455300	452	0,79,176,61,50,50,34,47	0,0,2,0,0,0,0,0	3,36,164,281,174	0,0,0,0,0	246	149	1	1	NA,1.0,0.982,1.0,1.0,1.0,1.0,1.0	1.0,1.0,1.0,1.0,1.0	-0.003	SE
453	Choren_v00_mik.OX359201.1G571	NA	chrOX359201.1	-	4453113	4453210	4448617	4448705	4456145	4456280	453	0,26,67,25,10,14,22,4	0,0,11,0,3,2,0,0	1,16,35,83,40	0,0,2,0,0	246	149	1	1	NA,1.0,0.787,1.0,0.669,0.809,1.0,1.0	1.0,1.0,0.914,1.0,1.0	-0.088	SE
454	Choren_v00_mik.OX359201.1G571	NA	chrOX359201.1	-	4455151	4455300	4448617	4448705	4456145	4456280	454	0,41,145,18,34,46,21,22	0,0,11,0,3,2,0,0	7,21,204,283,159	0,0,2,0,0	298	149	1	1	NA,1.0,0.868,1.0,0.85,0.92,1.0,1.0	1.0,1.0,0.981,1.0,1.0	-0.048	SE
455	Choren_v00_mik.OX359201.1G571	NA	chrOX359201.1	-	4455151	4455300	4453113	4453210	4456145	4456280	455	0,95,261,55,74,84,35,65	0,0,5,1,0,2,2,0	9,41,335,486,296	0,0,2,4,2	298	149	1	1	NA,1.0,0.963,0.965,1.0,0.955,0.897,1.0	1.0,1.0,0.988,0.984,0.987	-0.023	SE
456	Choren_v00_mik.OX359201.1G571	NA	chrOX359201.1	-	4456145	4456280	4448617	4448705	4457362	4457597	456	0,18,101,9,12,19,18,18	0,0,0,2,0,0,0,0	9,11,116,179,138	17,0,0,0,0	284	149	1	1	NA,1.0,1.0,0.702,1.0,1.0,1.0,1.0	0.217,1.0,1.0,1.0,1.0	0.114	SE
457	Choren_v00_mik.OX359201.1G567	NA	chrOX359201.1	+	4409233	4409282	4408566	4408646	4409352	4409399	457	2,272,852,71,295,79,119,77	0,0,2,0,0,0,0,0	105,14,130,142,178	0,0,0,0,4	198	149	1	1	1.0,1.0,0.997,1.0,1.0,1.0,1.0,1.0	1.0,1.0,1.0,1.0,0.971	0.005	SE
458	Choren_v00_mik.OX359201.1G567	NA	chrOX359201.1	+	4410224	4410315	4409352	4409399	4410559	4410630	458	1.59715e+22	0,0,2,0,0,1,0,0	191,65,258,520,527	0,0,0,0,0	240	149	1	1	1.0,1.0,0.998,1.0,1.0,0.994,1.0,1.0	1.0,1.0,1.0,1.0,1.0	-0.001	SE
459	Choren_v00_mik.OX359201.1G567	NA	chrOX359201.1	+	4411016	4411089	4410886	4410943	4411205	4411281	459	4.74112e+22	0,1,0,0,0,2,0,0	234,75,184,505,494	0,0,0,0,0	222	149	1	1	1.0,0.998,1.0,1.0,1.0,0.99,1.0,1.0	1.0,1.0,1.0,1.0,1.0	-0.001	SE
460	Choren_v00_mik.OX359201.1G567	NA	chrOX359201.1	+	4411205	4411281	4411016	4411089	4411344	4411466	460	5.67394e+21	0,1,0,0,0,0,0,0	206,73,311,392,380	0,0,0,0,0	225	149	1	1	1.0,0.998,1.0,1.0,1.0,1.0,1.0,1.0	1.0,1.0,1.0,1.0,1.0	0	SE
461	Choren_v00_mik.OX359201.1G568	NA	chrOX359201.1	-	4388865	4388952	4388272	4388410	4389499	4389595	461	8,193,532,83,119,105,168,135	0,1,0,0,0,0,1,0	73,33,371,200,405	0,0,0,0,0	236	149	1	1	1.0,0.992,1.0,1.0,1.0,1.0,0.991,1.0	1.0,1.0,1.0,1.0,1.0	-0.002	SE
462	Choren_v00_mik.OX359201.1G562	NA	chrOX359201.1	+	4354095	4354262	4353005	4353112	4355114	4355239	462	0,50,133,47,26,59,31,35	0,0,0,0,0,0,0,1	31,29,333,186,294	0,0,0,0,0	298	149	1	1	NA,1.0,1.0,1.0,1.0,1.0,1.0,0.946	1.0,1.0,1.0,1.0,1.0	-0.008	SE
463	Choren_v00_mik.OX359201.1G562	NA	chrOX359201.1	+	4357161	4357228	4356847	4356926	4357348	4357404	463	0,3,12,3,0,8,9,37	0,0,0,0,0,0,0,0	5,1,81,40,10	0,0,3,0,2	216	149	1	1	NA,1.0,1.0,1.0,NA,1.0,1.0,1.0	1.0,1.0,0.949,1.0,0.775	0.055	SE
464	Choren_v00_mik.OX359201.1G562	NA	chrOX359201.1	+	4357348	4357404	4356847	4356926	4357793	4357937	464	0,3,8,7,0,4,5,15	0,0,0,0,0,0,0,0	3,2,53,25,19	0,0,4,0,0	205	149	1	1	NA,1.0,1.0,1.0,NA,1.0,1.0,1.0	1.0,1.0,0.906,1.0,1.0	0.019	SE
465	Choren_v00_mik.OX359201.1G562	NA	chrOX359201.1	+	4361607	4361713	4360000	4360052	4362280	4362424	465	2,76,242,61,56,86,53,94	0,0,0,0,0,0,0,0	42,43,396,254,362	0,0,0,0,2	255	149	1	1	1.0,1.0,1.0,1.0,1.0,1.0,1.0,1.0	1.0,1.0,1.0,1.0,0.991	0.002	SE
466	Choren_v00_mik.OX359201.1G562	NA	chrOX359201.1	+	4362605	4362694	4362280	4362424	4362944	4363114	466	0,83,220,55,75,40,56,59	0,0,0,0,0,0,3,0	29,29,375,238,324	0,0,6,0,3	238	149	1	1	NA,1.0,1.0,1.0,1.0,1.0,0.921,1.0	1.0,1.0,0.975,1.0,0.985	-0.003	SE
467	Choren_v00_mik.OX359201.1G562	NA	chrOX359201.1	+	4364083	4364248	4362944	4363114	4365537	4365690	467	0,52,148,66,28,22,48,46	0,0,0,0,0,0,2,0	43,18,311,148,227	0,0,0,0,0	298	149	1	1	NA,1.0,1.0,1.0,1.0,1.0,0.923,1.0	1.0,1.0,1.0,1.0,1.0	-0.011	SE
468	Choren_v00_mik.OX359201.1G562	NA	chrOX359201.1	+	4365068	4365145	4364083	4364248	4365537	4365690	468	2,150,312,146,132,95,221,107	0,0,0,0,0,0,0,4	100,36,587,322,632	0,0,0,0,0	226	149	1	1	1.0,1.0,1.0,1.0,1.0,1.0,1.0,0.946	1.0,1.0,1.0,1.0,1.0	-0.007	SE
469	Choren_v00_mik.OX359201.1G527	NA	chrOX359201.1	-	4079316	4079441	4078775	4079219	4079649	4079837	469	4,145,30,99,19,36,172,62	0,0,0,1,0,0,7,0	0,55,10,362,577	0,2,0,1,0	274	149	1	1	1.0,1.0,1.0,0.982,1.0,1.0,0.93,1.0	NA,0.937,1.0,0.995,1.0	0.006	SE
470	Choren_v00_mik.OX359201.1G527	NA	chrOX359201.1	-	4079649	4079837	4079316	4079441	4079894	4079954	470	2,49,12,29,13,15,68,38	0,0,0,0,0,0,0,0	0,12,0,154,209	0,0,1,0,0	298	149	1	1	1.0,1.0,1.0,1.0,1.0,1.0,1.0,1.0	NA,1.0,0.0,1.0,1.0	0.25	SE
471	Choren_v00_mik.OX359201.1G527	NA	chrOX359201.1	-	4080583	4080718	4080094	4080299	4084032	4084211	471	0,28,1,15,0,9,21,30	0,0,0,0,0,0,5,0	0,17,2,67,105	0,0,0,0,0	284	149	1	1	NA,1.0,1.0,1.0,NA,1.0,0.688,1.0	NA,1.0,1.0,1.0,1.0	-0.052	SE
472	Choren_v00_mik.OX359201.1G520	NA	chrOX359201.1	-	4016030	4016132	4015822	4015944	4016199	4016370	472	1.91139e+27	0,0,0,2,0,0,0,0	8.16297e+16	0,0,0,0,0	251	149	1	1	1.0,1.0,1.0,0.996,1.0,1.0,1.0,1.0	1.0,1.0,1.0,1.0,1.0	0	SE
473	Choren_v00_mik.OX359201.1G520	NA	chrOX359201.1	-	4030831	4031044	4030150	4030303	4031589	4031773	473	6,85,1270,79,289,108,58,68	0,0,0,0,0,0,0,0	41,18,219,357,163	0,0,0,2,0	298	149	1	1	1.0,1.0,1.0,1.0,1.0,1.0,1.0,1.0	1.0,1.0,1.0,0.989,1.0	0.002	SE
474	Choren_v00_mik.OX359201.1G510	NA	chrOX359201.1	+	3969847	3969956	3969652	3969765	3970408	3970523	474	0,4,11,3,4,7,5,4	0,0,0,0,1,0,0,0	5,0,0,2,2	1,0,0,0,0	258	149	1	1	NA,1.0,1.0,1.0,0.698,1.0,1.0,1.0	0.743,NA,NA,1.0,1.0	0.043	SE
475	Choren_v00_mik.OX359201.1G491	NA	chrOX359201.1	-	3852721	3852904	3852416	3852616	3852971	3853048	475	4,107,430,193,168,87,180,153	0,0,0,0,0,0,0,0	170,67,285,445,342	2,0,1,0,1	298	149	1	1	1.0,1.0,1.0,1.0,1.0,1.0,1.0,1.0	0.977,1.0,0.993,1.0,0.994	0.007	SE
477	Choren_v00_mik.OX359201.1G491	NA	chrOX359201.1	-	3852971	3853048	3852416	3852616	3853132	3853227	477	0,31,52,24,30,21,61,19	0,0,1,0,0,0,0,0	37,6,51,68,60	0,0,11,2,0	226	149	1	1	NA,1.0,0.972,1.0,1.0,1.0,1.0,1.0	1.0,1.0,0.753,0.957,1.0	0.054	SE
478	Choren_v00_mik.OX359201.1G491	NA	chrOX359201.1	-	3852971	3853048	3852721	3852904	3853132	3853227	478	0,76,255,103,87,63,156,87	0,0,0,0,0,0,0,0	105,40,179,245,164	0,0,2,0,3	226	149	1	1	NA,1.0,1.0,1.0,1.0,1.0,1.0,1.0	1.0,1.0,0.983,1.0,0.973	0.009	SE
479	Choren_v00_mik.OX359201.1G491	NA	chrOX359201.1	-	3853132	3853227	3852416	3852616	3854671	3854803	479	0,16,22,6,14,8,17,5	0,0,0,1,0,0,0,0	33,8,30,34,36	0,0,0,0,0	244	149	1	1	NA,1.0,1.0,0.786,1.0,1.0,1.0,1.0	1.0,1.0,1.0,1.0,1.0	-0.031	SE
480	Choren_v00_mik.OX359201.1G491	NA	chrOX359201.1	-	3857225	3857353	3855969	3856090	3860849	3861094	480	0,12,52,13,22,10,12,8	0,1,0,0,0,0,0,0	10,4,44,50,63	0,0,1,0,0	277	149	1	1	NA,0.866,1.0,1.0,1.0,1.0,1.0,1.0	1.0,1.0,0.959,1.0,1.0	-0.011	SE
482	Choren_v00_mik.OX359201.1G488	NA	chrOX359201.1	-	3792404	3792514	3779573	3779970	3803603	3803648	482	6.30211e+22	0,0,6,0,0,0,0,0	182127576540817	0,0,0,0,3	259	149	1	1	1.0,1.0,0.99,1.0,1.0,1.0,1.0,1.0	1.0,1.0,1.0,1.0,0.994	0	SE
483	Choren_v00_mik.OX359202.1G398	NA	chrOX359202.1	+	2083932	2084165	2083603	2083869	2084231	2084564	483	0,3,22,3,3,14,2,6	0,3,0,0,0,0,0,0	16,2,7,24,125	0,0,0,0,0	298	149	1	1	NA,0.333,1.0,1.0,1.0,1.0,1.0,1.0	1.0,1.0,1.0,1.0,1.0	-0.095	SE
484	Choren_v00_mik.OX359201.1G400	NA	chrOX359201.1	+	2421764	2421819	2420673	2420786	2422104	2422198	484	0,98,260,45,44,48,25,46	0,1,0,0,4,0,0,0	31,31,60,146,65	1,0,6,0,0	204	149	1	1	NA,0.986,1.0,1.0,0.889,1.0,1.0,1.0	0.958,1.0,0.88,1.0,1.0	0.015	SE
485	Choren_v00_mik.OX359201.1G400	NA	chrOX359201.1	+	2429692	2429841	2422104	2422198	2431144	2431217	485	3,98,364,45,48,53,63,53	0,0,2,0,0,0,0,0	44,36,85,157,36	0,0,0,0,0	298	149	1	1	1.0,1.0,0.989,1.0,1.0,1.0,1.0,1.0	1.0,1.0,1.0,1.0,1.0	-0.001	SE
486	Choren_v00_mik.OX359201.1G400	NA	chrOX359201.1	+	2449510	2449578	2440533	2440648	2460720	2460783	486	0,128,308,91,92,32,73,39	0,0,0,0,0,0,0,0	65,32,84,169,70	0,0,4,0,2	217	149	1	1	NA,1.0,1.0,1.0,1.0,1.0,1.0,1.0	1.0,1.0,0.935,1.0,0.96	0.021	SE
487	Choren_v00_mik.OX359201.1G396	NA	chrOX359201.1	+	2390937	2391049	2390014	2390097	2392783	2392865	487	0,44,149,31,42,29,23,28	0,0,0,0,0,0,0,0	10,18,45,65,18	1,0,0,0,0	261	149	1	1	NA,1.0,1.0,1.0,1.0,1.0,1.0,1.0	0.851,1.0,1.0,1.0,1.0	0.03	SE
488	Choren_v00_mik.OX359201.1G396	NA	chrOX359201.1	+	2392783	2392865	2390937	2391049	2392956	2393052	488	0,54,160,24,32,29,36,31	0,0,2,0,0,0,0,0	13,18,24,62,17	0,0,0,0,0	231	149	1	1	NA,1.0,0.981,1.0,1.0,1.0,1.0,1.0	1.0,1.0,1.0,1.0,1.0	-0.003	SE
489	Choren_v00_mik.OX359201.1G364	NA	chrOX359201.1	+	2165407	2165656	2165075	2165285	2166242	2166324	489	0,66,10,11,7,6,0,27	0,0,3,0,0,0,0,0	45,0,47,2,17	0,0,0,0,0	298	149	1	1	NA,1.0,0.625,1.0,1.0,1.0,NA,1.0	1.0,NA,1.0,1.0,1.0	-0.062	SE
490	Choren_v00_mik.OX359201.1G364	NA	chrOX359201.1	+	2173495	2173597	2173231	2173333	2176136	2176389	490	0,18,0,0,0,0,0,0	0,77,10,0,0,2,0,0	35,0,0,0,0	47,0,0,0,0	251	149	1	1	NA,0.122,0.0,NA,NA,0.0,NA,NA	0.307,NA,NA,NA,NA	-0.266	SE
491	Choren_v00_mik.OX359201.1G366	NA	chrOX359201.1	-	2150885	2150942	2150754	2150823	2152541	2152652	491	1.17372e+23	0,0,0,0,0,0,0,0	5.21123e+16	0,1,0,0,0	206	149	1	1	1.0,1.0,1.0,1.0,1.0,1.0,1.0,1.0	1.0,0.989,1.0,1.0,1.0	0.002	SE
492	Choren_v00_mik.OX359201.1G366	NA	chrOX359201.1	-	2153033	2153116	2152541	2152652	2153618	2153724	492	3.74224e+22	0,0,0,0,1,0,0,0	6.33115e+17	0,0,2,5,0	232	149	1	1	1.0,1.0,1.0,1.0,0.998,1.0,1.0,1.0	1.0,1.0,0.998,0.993,1.0	0.002	SE
493	Choren_v00_mik.OX359201.1G363	NA	chrOX359201.1	-	2143410	2143585	2141679	2141854	2144289	2144355	493	0,165,536,111,103,190,149,26	0,0,11,4,0,2,7,0	40,22,16,18,6	0,0,0,0,0	298	149	1	1	NA,1.0,0.961,0.933,1.0,0.979,0.914,1.0	1.0,1.0,1.0,1.0,1.0	-0.03	SE
494	Choren_v00_mik.OX359201.1G363	NA	chrOX359201.1	-	2145031	2145196	2144289	2144355	2145292	2145553	494	0,181,532,65,74,171,151,60	0,0,2,0,0,0,0,0	64,49,71,39,27	0,0,0,0,0	298	149	1	1	NA,1.0,0.993,1.0,1.0,1.0,1.0,1.0	1.0,1.0,1.0,1.0,1.0	-0.001	SE
495	Choren_v00_mik.OX359201.1G361	NA	chrOX359201.1	+	2140063	2140158	2139073	2139243	2140724	2140765	495	0,119,469,41,134,64,119,39	0,0,0,0,0,0,0,0	40,10,226,58,405	0,0,1,0,0	244	149	1	1	NA,1.0,1.0,1.0,1.0,1.0,1.0,1.0	1.0,1.0,0.993,1.0,1.0	0.001	SE
496	Choren_v00_mik.OX359201.1G348	NA	chrOX359201.1	+	2055426	2055512	2055142	2055306	2055730	2055975	496	0,9,49,32,30,9,17,52	0,0,0,0,1,0,0,0	35,14,8,6,5	0,0,0,0,0	235	149	1	1	NA,1.0,1.0,1.0,0.95,1.0,1.0,1.0	1.0,1.0,1.0,1.0,1.0	-0.007	SE
497	Choren_v00_mik.OX359201.1G343	NA	chrOX359201.1	-	2004916	2004975	2004293	2004519	2005520	2005785	497	0,5,29,8,16,15,5,7	0,19,55,6,8,16,4,0	1,9,30,13,10	0,2,27,17,45	208	149	1	1	NA,0.159,0.274,0.489,0.589,0.402,0.472,1.0	1.0,0.763,0.443,0.354,0.137	-0.056	SE
498	Choren_v00_mik.OX359201.1G343	NA	chrOX359201.1	-	2005520	2005785	2004293	2004519	2006382	2007568	498	0,52,122,15,28,32,26,7	0,0,0,0,0,0,0,0	1,5,88,64,94	0,0,0,2,0	298	149	1	1	NA,1.0,1.0,1.0,1.0,1.0,1.0,1.0	1.0,1.0,1.0,0.941,1.0	0.012	SE
499	Choren_v00_mik.OX359201.1G337	NA	chrOX359201.1	+	1961439	1961462	1961026	1961255	1961538	1961626	499	0,46,33,5,9,43,2,41	0,0,2,0,0,0,0,0	1,7,101,4,62	0,0,0,0,0	172	149	1	1	NA,1.0,0.935,1.0,1.0,1.0,1.0,1.0	1.0,1.0,1.0,1.0,1.0	-0.009	SE
500	Choren_v00_mik.OX359201.1G337	NA	chrOX359201.1	+	1973534	1973583	1973251	1973355	1973724	1973782	500	1,135,31,8,56,94,22,116	0,2,0,0,0,0,0,0	12,28,310,66,267	0,0,0,0,0	198	149	1	1	1.0,0.981,1.0,1.0,1.0,1.0,1.0,1.0	1.0,1.0,1.0,1.0,1.0	-0.002	SE
501	Choren_v00_mik.OX359201.1G337	NA	chrOX359201.1	+	1978071	1978143	1977641	1977761	1978324	1978753	501	0,124,124,57,43,97,90,72	0,2,0,0,0,0,0,0	98,26,349,103,388	0,0,0,0,0	221	149	1	1	NA,0.977,1.0,1.0,1.0,1.0,1.0,1.0	1.0,1.0,1.0,1.0,1.0	-0.003	SE
502	Choren_v00_mik.OX359201.1G336	NA	chrOX359201.1	+	1955029	1955111	1954683	1954784	1955169	1955243	502	0,5,283,0,93,66,28,50	0,0,0,0,0,0,0,0	30,10,215,2,17	0,0,2,0,0	231	149	1	1	NA,1.0,1.0,NA,1.0,1.0,1.0,1.0	1.0,1.0,0.986,1.0,1.0	0.003	SE
503	Choren_v00_mik.OX359201.1G336	NA	chrOX359201.1	+	1955029	1955111	1954683	1954784	1955425	1955462	503	0,0,12,0,10,38,6,22	0,0,0,0,0,0,0,6	5,1,26,0,1	0,0,0,0,0	231	149	1	1	NA,NA,1.0,NA,1.0,1.0,1.0,0.703	1.0,1.0,1.0,NA,1.0	-0.059	SE
504	Choren_v00_mik.OX359201.1G336	NA	chrOX359201.1	+	1955169	1955243	1954683	1954784	1955425	1955462	504	0,6,297,1,104,8,31,55	0,0,0,0,0,0,0,6	28,4,153,0,17	0,0,0,0,0	223	149	1	1	NA,1.0,1.0,1.0,1.0,1.0,1.0,0.86	1.0,1.0,1.0,NA,1.0	-0.02	SE
505	Choren_v00_mik.OX359201.1G336	NA	chrOX359201.1	+	1955169	1955243	1955029	1955111	1955425	1955462	505	0,11,562,1,193,37,53,85	0,0,0,0,2,0,0,0	55,13,351,2,33	2,0,6,0,0	223	149	1	1	NA,1.0,1.0,1.0,0.985,1.0,1.0,1.0	0.948,1.0,0.975,1.0,1.0	0.013	SE
507	Choren_v00_mik.OX359201.1G330	NA	chrOX359201.1	+	1881008	1881100	1880730	1880930	1881312	1881394	507	3,142,0,0,54,76,0,78	0,0,0,0,2,0,0,0	2,15,73,17,14	0,0,0,0,0	241	149	1	1	1.0,1.0,NA,NA,0.943,1.0,NA,1.0	1.0,1.0,1.0,1.0,1.0	-0.011	SE
508	Choren_v00_mik.OX359201.1G330	NA	chrOX359201.1	+	1884459	1884533	1884015	1884103	1884927	1885062	508	0,153,2,3,60,143,0,11	0,0,0,0,0,1,0,0	0,22,36,12,7	0,0,0,0,0	223	149	1	1	NA,1.0,1.0,1.0,1.0,0.99,NA,1.0	NA,1.0,1.0,1.0,1.0	-0.002	SE
509	Choren_v00_mik.OX359201.1G329	NA	chrOX359201.1	+	1858563	1858600	1858000	1858074	1858840	1858938	509	0,12,0,28,0,38,38,5	0,0,0,0,0,0,0,0	12,0,0,4,9	1,0,0,0,0	186	149	1	1	NA,1.0,NA,1.0,NA,1.0,1.0,1.0	0.906,NA,NA,1.0,1.0	0.031	SE
510	Choren_v00_mik.OX359201.1G325	NA	chrOX359201.1	+	1819744	1819879	1819032	1819106	1821163	1821298	510	0,5,60,7,0,32,0,0	0,0,0,0,0,4,0,0	3,0,0,0,0	0,0,0,0,0	284	149	1	1	NA,1.0,1.0,1.0,NA,0.808,NA,NA	1.0,NA,NA,NA,NA	-0.048	SE
511	Choren_v00_mik.OX359201.1G310	NA	chrOX359201.1	-	1689789	1689891	1689495	1689708	1690393	1690573	511	0,12,76,5,29,7,0,0	0,0,10,0,0,0,0,0	12,2,35,5,6	1,0,1,0,1	251	149	1	1	NA,1.0,0.819,1.0,1.0,1.0,NA,NA	0.877,1.0,0.954,1.0,0.781	0.041	SE
512	Choren_v00_mik.OX359201.1G307	NA	chrOX359201.1	-	1665094	1665127	1664646	1664991	1665943	1666110	512	0,0,0,0,0,0,26,0	0,0,0,0,0,0,0,0	0,0,1,0,0	0,0,0,1,0	182	149	1	1	NA,NA,NA,NA,NA,NA,1.0,NA	NA,NA,1.0,0.0,NA	0.5	SE
513	Choren_v00_mik.OX359201.1G307	NA	chrOX359201.1	-	1665191	1665323	1665094	1665127	1665943	1666110	513	3,11,0,63,32,38,68,0	0,0,0,0,0,0,0,0	1,0,62,63,44	0,0,1,0,0	281	149	1	1	1.0,1.0,NA,1.0,1.0,1.0,1.0,NA	1.0,NA,0.97,1.0,1.0	0.008	SE
514	Choren_v00_mik.OX359201.1G303	NA	chrOX359201.1	+	1639885	1639933	1639479	1639605	1641070	1641284	514	0,34,21,7,8,2,1,7	0,0,1,0,0,0,0,0	23,0,15,1,6	0,0,0,0,0	197	149	1	1	NA,1.0,0.941,1.0,1.0,1.0,1.0,1.0	1.0,NA,1.0,1.0,1.0	-0.008	SE
515	Choren_v00_mik.OX359201.1G285	NA	chrOX359201.1	+	1533800	1534138	1533190	1533395	1534411	1534552	515	0,0,0,1,0,1,5,5	0,0,0,0,0,0,0,0	9,56,1935,1360,1446	0,2,0,0,0	298	149	1	1	NA,NA,NA,1.0,NA,1.0,1.0,1.0	1.0,0.933,1.0,1.0,1.0	0.013	SE
516	Choren_v00_mik.OX359201.1G285	NA	chrOX359201.1	+	1547605	1547665	1547323	1547476	1548282	1548843	516	0,20,33,9,32,15,8,8	0,2,0,0,0,0,0,0	1.94125e+17	0,0,29,10,5	209	149	1	1	NA,0.877,1.0,1.0,1.0,1.0,1.0,1.0	1.0,1.0,0.994,0.997,0.999	-0.016	SE
517	Choren_v00_mik.OX359201.1G283	NA	chrOX359201.1	-	1507244	1507345	1506648	1506757	1507902	1509547	517	0,39,45,0,4,3,0,1	0,0,1,0,0,0,0,0	9,2,10,0,5	0,0,0,0,0	250	149	1	1	NA,1.0,0.964,NA,1.0,1.0,NA,1.0	1.0,1.0,1.0,NA,1.0	-0.007	SE
518	Choren_v00_mik.OX359202.1G99	NA	chrOX359202.1	-	451791	451923	451314	451519	452279	452437	518	5,148,167,91,67,46,191,100	0,2,0,0,0,0,0,0	56,32,40,57,16	0,0,0,0,0	281	149	1	1	1.0,0.975,1.0,1.0,1.0,1.0,1.0,1.0	1.0,1.0,1.0,1.0,1.0	-0.003	SE
519	Choren_v00_mik.OX359201.1G271	NA	chrOX359201.1	-	1439420	1439492	1438611	1438767	1439939	1440024	519	2,66,54,24,90,77,145,56	0,1,0,0,0,0,0,0	39,16,5,6,9	0,0,0,0,0	221	149	1	1	1.0,0.978,1.0,1.0,1.0,1.0,1.0,1.0	1.0,1.0,1.0,1.0,1.0	-0.003	SE
520	Choren_v00_mik.OX359201.1G265	NA	chrOX359201.1	+	1406277	1406334	1406132	1406186	1406438	1406483	520	1,128,403,7,17,46,59,46	0,0,0,0,1,0,0,0	84,0,0,9,1	0,0,0,0,0	206	149	1	1	1.0,1.0,1.0,1.0,0.925,1.0,1.0,1.0	1.0,NA,NA,1.0,1.0	-0.009	SE
521	Choren_v00_mik.OX359201.1G262	NA	chrOX359201.1	+	1378375	1378490	1375555	1375806	1378608	1379256	521	0,139,187,31,78,109,80,94	0,0,0,0,0,3,0,0	31,8,57,31,14	0,0,0,0,1	264	149	1	1	NA,1.0,1.0,1.0,1.0,0.954,1.0,1.0	1.0,1.0,1.0,1.0,0.888	0.016	SE
524	Choren_v00_mik.OX359201.1G260	NA	chrOX359201.1	+	1357082	1357270	1356388	1356487	1359772	1359939	524	1,18,0,1,4,5,11,18	0,0,0,0,0,2,0,0	17,5,10,0,0	0,0,0,0,0	298	149	1	1	1.0,1.0,NA,1.0,1.0,0.556,1.0,1.0	1.0,1.0,1.0,NA,NA	-0.063	SE
525	Choren_v00_mik.OX359201.1G260	NA	chrOX359201.1	+	1358428	1358802	1357082	1357270	1359772	1359939	525	5,61,39,58,48,44,81,88	0,4,0,0,0,0,0,0	70,30,36,15,24	0,0,0,0,0	298	149	1	1	1.0,0.884,1.0,1.0,1.0,1.0,1.0,1.0	1.0,1.0,1.0,1.0,1.0	-0.014	SE
526	Choren_v00_mik.OX359201.1G258	NA	chrOX359201.1	-	1320890	1320927	1318967	1319206	1321230	1321309	526	3,79,278,80,32,78,122,80	0,0,0,0,0,0,0,0	38,26,88,88,65	0,2,0,0,0	186	149	1	1	1.0,1.0,1.0,1.0,1.0,1.0,1.0,1.0	1.0,0.912,1.0,1.0,1.0	0.018	SE
527	Choren_v00_mik.OX359201.1G258	NA	chrOX359201.1	-	1322932	1322965	1321636	1321777	1329644	1329851	527	0,18,21,19,13,8,48,57	0,0,2,0,0,0,0,0	4,0,0,31,9	0,0,0,0,0	182	149	1	1	NA,1.0,0.896,1.0,1.0,1.0,1.0,1.0	1.0,NA,NA,1.0,1.0	-0.015	SE
528	Choren_v00_mik.OX359201.1G255	NA	chrOX359201.1	+	1287494	1287543	1287047	1287175	1287919	1288010	528	2,127,13,102,126,49,118,42	0,0,0,0,0,0,0,0	46,20,30,51,13	0,0,2,0,0	198	149	1	1	1.0,1.0,1.0,1.0,1.0,1.0,1.0,1.0	1.0,1.0,0.919,1.0,1.0	0.016	SE
529	Choren_v00_mik.OX359201.1G255	NA	chrOX359201.1	+	1288171	1288212	1287919	1288010	1288641	1288739	529	0,131,104,190,128,23,182,53	0,0,0,0,0,0,0,0	6,69,55,58,10	0,0,0,1,0	190	149	1	1	NA,1.0,1.0,1.0,1.0,1.0,1.0,1.0	1.0,1.0,1.0,0.978,1.0	0.004	SE
530	Choren_v00_mik.OX359201.1G255	NA	chrOX359201.1	+	1288641	1288739	1288171	1288212	1302086	1302197	530	0,68,59,100,61,10,117,31	0,1,0,0,0,0,0,0	0,52,32,38,4	0,0,0,0,4	247	149	1	1	NA,0.976,1.0,1.0,1.0,1.0,1.0,1.0	NA,1.0,1.0,1.0,0.376	0.153	SE
531	Choren_v00_mik.OX359201.1G255	NA	chrOX359201.1	+	1289710	1289755	1288641	1288739	1302086	1302197	531	0,94,166,135,52,13,115,30	0,0,0,0,0,0,1,0	4,40,34,32,7	0,0,0,0,0	194	149	1	1	NA,1.0,1.0,1.0,1.0,1.0,0.989,1.0	1.0,1.0,1.0,1.0,1.0	-0.002	SE
532	Choren_v00_mik.OX359201.1G255	NA	chrOX359201.1	+	1300225	1300304	1289710	1289755	1302086	1302197	532	0,0,5,0,0,0,0,2	0,72,118,79,29,13,83,23	0,0,0,0,0	4,27,19,28,6	228	149	1	1	NA,0.0,0.027,0.0,0.0,0.0,0.0,0.054	0.0,0.0,0.0,0.0,0.0	0.012	SE
533	Choren_v00_mik.OX359201.1G255	NA	chrOX359201.1	+	1302086	1302197	1289710	1289755	1303313	1303388	533	0,107,148,146,43,25,118,40	0,2,0,0,0,0,0,0	13,41,42,33,11	0,0,0,0,0	260	149	1	1	NA,0.968,1.0,1.0,1.0,1.0,1.0,1.0	1.0,1.0,1.0,1.0,1.0	-0.005	SE
534	Choren_v00_mik.OX359201.1G249	NA	chrOX359201.1	+	1255129	1255274	1254921	1254989	1255980	1256067	534	9.35612e+22	0,2,0,0,0,0,0,0	186,49,617,563,552	0,0,4,3,2	294	149	1	1	1.0,0.989,1.0,1.0,1.0,1.0,1.0,1.0	1.0,1.0,0.987,0.99,0.993	0.005	SE
535	Choren_v00_mik.OX359201.1G228	NA	chrOX359201.1	+	1142316	1142378	1141881	1141962	1142528	1142595	535	0,32,102,10,51,46,16,31	0,0,2,0,0,1,0,0	13,12,111,73,101	0,0,0,0,0	211	149	1	1	NA,1.0,0.973,1.0,1.0,0.97,1.0,1.0	1.0,1.0,1.0,1.0,1.0	-0.008	SE
536	Choren_v00_mik.OX359201.1G228	NA	chrOX359201.1	+	1145125	1145203	1144127	1144292	1145833	1145902	536	0,52,181,21,56,65,56,49	0,0,1,0,0,0,0,0	23,20,182,92,196	0,0,0,0,0	227	149	1	1	NA,1.0,0.992,1.0,1.0,1.0,1.0,1.0	1.0,1.0,1.0,1.0,1.0	-0.001	SE
538	Choren_v00_mik.OX359201.1G223	NA	chrOX359201.1	+	1128666	1128712	1128494	1128594	1129133	1129334	538	7,208,922,339,123,97,590,172	0,0,0,0,0,0,0,4	26,21,246,193,517	0,0,0,0,0	195	149	1	1	1.0,1.0,1.0,1.0,1.0,1.0,1.0,0.97	1.0,1.0,1.0,1.0,1.0	-0.004	SE
540	Choren_v00_mik.OX359201.1G221	NA	chrOX359201.1	-	1118430	1118516	1117920	1118174	1118720	1118935	540	2,12,39,52,36,17,83,40	0,0,0,0,1,0,0,0	9,8,28,14,18	0,0,0,0,0	235	149	1	1	1.0,1.0,1.0,1.0,0.958,1.0,1.0,1.0	1.0,1.0,1.0,1.0,1.0	-0.005	SE
541	Choren_v00_mik.OX359201.1G211	NA	chrOX359201.1	-	1072182	1072446	1071625	1071693	1073380	1073455	541	4,48,215,16,56,4,35,27	0,2,0,0,0,0,0,0	20,20,739,689,522	0,0,0,0,0	298	149	1	1	1.0,0.923,1.0,1.0,1.0,1.0,1.0,1.0	1.0,1.0,1.0,1.0,1.0	-0.01	SE
542	Choren_v00_mik.OX359201.1G211	NA	chrOX359201.1	-	1073380	1073455	1072182	1072446	1073711	1073885	542	3,69,148,21,49,3,49,35	0,0,0,0,0,0,0,0	26,13,727,521,513	2,0,4,0,1	224	149	1	1	1.0,1.0,1.0,1.0,1.0,1.0,1.0,1.0	0.896,1.0,0.992,1.0,0.997	0.023	SE
547	Choren_v00_mik.OX359201.1G186	NA	chrOX359201.1	+	923403	923513	923010	923120	923673	923825	547	0,10,35,94,61,18,107,21	0,0,0,0,0,0,0,1	74,3,204,26,203	0,0,0,0,0	259	149	1	1	NA,1.0,1.0,1.0,1.0,1.0,1.0,0.924	1.0,1.0,1.0,1.0,1.0	-0.011	SE
548	Choren_v00_mik.OX359201.1G187	NA	chrOX359201.1	-	914964	915060	914561	914660	915400	915452	548	0,26,3,19,26,14,0,15	0,0,0,0,0,1,0,0	15,1,180,3,95	0,0,0,0,1	245	149	1	1	NA,1.0,1.0,1.0,1.0,0.895,NA,1.0	1.0,1.0,1.0,1.0,0.983	-0.014	SE
549	Choren_v00_mik.OX359201.1G187	NA	chrOX359201.1	-	915400	915452	914964	915060	915873	915956	549	0,16,2,8,27,16,0,13	0,0,1,0,0,0,0,0	7,0,164,0,80	0,0,0,0,0	201	149	1	1	NA,1.0,0.597,1.0,1.0,1.0,NA,1.0	1.0,NA,1.0,NA,1.0	-0.067	SE
550	Choren_v00_mik.OX359201.1G187	NA	chrOX359201.1	-	919449	919739	918900	918962	919984	920039	550	0,26,118,15,15,24,8,27	0,0,0,0,0,0,0,0	9,28,121,126,78	0,0,0,4,0	298	149	1	1	NA,1.0,1.0,1.0,1.0,1.0,1.0,1.0	1.0,1.0,1.0,0.94,1.0	0.012	SE
551	Choren_v00_mik.OX359201.1G181	NA	chrOX359201.1	+	885717	885770	885015	885090	886281	886322	551	7.403e+21	0,1,1,0,0,0,0,0	180,55,221,383,48	0,0,0,0,0	202	149	1	1	1.0,0.997,0.999,1.0,1.0,1.0,1.0,1.0	1.0,1.0,1.0,1.0,1.0	0	SE
552	Choren_v00_mik.OX359201.1G181	NA	chrOX359201.1	+	886281	886322	885717	885770	886816	886884	552	8.46712e+22	0,1,4,0,0,0,0,0	220,74,273,422,61	0,0,0,0,0	190	149	1	1	1.0,0.997,0.996,1.0,1.0,1.0,1.0,1.0	1.0,1.0,1.0,1.0,1.0	-0.001	SE
553	Choren_v00_mik.OX359201.1G181	NA	chrOX359201.1	+	886816	886884	886281	886322	888072	888191	553	6.50116e+22	0,1,9,1,4,0,0,0	255,119,312,456,76	0,0,0,1,0	217	149	1	1	1.0,0.997,0.992,0.996,0.991,1.0,1.0,1.0	1.0,1.0,1.0,0.997,1.0	-0.002	SE
554	Choren_v00_mik.OX359201.1G177	NA	chrOX359201.1	-	865415	865536	864775	865336	866895	867104	554	3,6,21,2,5,108,52,52	0,0,0,0,0,0,4,0	56,19,11,17,2	0,0,0,0,0	270	149	1	1	1.0,1.0,1.0,1.0,1.0,1.0,0.878,1.0	1.0,1.0,1.0,1.0,1.0	-0.015	SE
555	Choren_v00_mik.OX359201.1G176	NA	chrOX359201.1	-	860980	861037	860650	860689	861282	861309	555	0,0,0,2,0,0,4,3	1,24,83,29,8,8,11,25	5,1,0,0,0	51,9,19,0,4	206	149	1	1	0.0,0.0,0.0,0.048,0.0,0.0,0.208,0.08	0.066,0.074,0.0,NA,0.0	0.007	SE
556	Choren_v00_mik.OX359201.1G165	NA	chrOX359201.1	-	802539	802581	802261	802431	803393	803651	556	0,2,12,0,1,9,2,91	0,0,4,0,0,0,0,0	4,13,0,2,0	0,0,0,0,0	191	149	1	1	NA,1.0,0.701,NA,1.0,1.0,1.0,1.0	1.0,1.0,NA,1.0,NA	-0.05	SE
557	Choren_v00_mik.OX359201.1G159	NA	chrOX359201.1	+	781396	781467	780982	781090	781657	781715	557	0,351,766,407,329,263,630,162	0,0,1,0,0,0,0,0	237121387896208	0,0,0,0,0	220	149	1	1	NA,1.0,0.998,1.0,1.0,1.0,1.0,1.0	1.0,1.0,1.0,1.0,1.0	0	SE
558	Choren_v00_mik.OX359201.1G159	NA	chrOX359201.1	+	781657	781715	780982	781090	781778	781922	558	0,117,346,138,106,119,213,98	0,0,0,0,0,0,0,0	130,41,113,430,78	0,0,0,0,2	207	149	1	1	NA,1.0,1.0,1.0,1.0,1.0,1.0,1.0	1.0,1.0,1.0,1.0,0.966	0.007	SE
559	Choren_v00_mik.OX359201.1G140	NA	chrOX359201.1	+	719773	719830	715061	719103	719955	720651	559	0,4,0,5,0,0,0,9	0,0,0,1,0,0,0,0	26,0,0,0,0	0,0,0,0,0	206	149	1	1	NA,1.0,NA,0.783,NA,NA,NA,1.0	1.0,NA,NA,NA,NA	-0.072	SE
560	Choren_v00_mik.OX359201.1G794	NA	chrOX359201.1	-	5839847	5839967	5839083	5839283	5842673	5842945	560	0,147,781,20,94,78,55,31	0,0,5,0,0,0,0,0	32,22,389,219,418	0,0,0,1,2	269	149	1	1	NA,1.0,0.989,1.0,1.0,1.0,1.0,1.0	1.0,1.0,1.0,0.992,0.991	0.002	SE
561	Choren_v00_mik.OX359201.1G794	NA	chrOX359201.1	-	5840291	5840514	5839847	5839967	5842673	5842945	561	3,313,1224,40,340,211,170,67	0,0,5,0,0,0,0,0	48,72,593,416,881	0,0,0,3,0	298	149	1	1	1.0,1.0,0.992,1.0,1.0,1.0,1.0,1.0	1.0,1.0,1.0,0.986,1.0	0.002	SE
562	Choren_v00_mik.OX359201.1G136	NA	chrOX359201.1	+	655074	655140	654599	654677	655552	655623	562	4,61,247,124,55,59,165,37	0,0,0,4,0,0,0,0	105,16,83,101,50	0,0,0,0,0	215	149	1	1	1.0,1.0,1.0,0.956,1.0,1.0,1.0,1.0	1.0,1.0,1.0,1.0,1.0	-0.006	SE
563	Choren_v00_mik.OX359201.1G136	NA	chrOX359201.1	+	655552	655623	655074	655140	656053	656144	563	4,47,357,142,67,103,222,100	0,0,1,0,0,0,0,0	107,25,107,124,64	0,0,0,0,0	220	149	1	1	1.0,1.0,0.996,1.0,1.0,1.0,1.0,1.0	1.0,1.0,1.0,1.0,1.0	0	SE
564	Choren_v00_mik.OX359201.1G143	NA	chrOX359201.1	-	641089	641173	640192	640969	641453	641516	564	0,44,279,33,72,12,51,39	0,0,15,0,0,0,0,0	52,15,493,252,457	0,0,0,0,0	233	149	1	1	NA,1.0,0.922,1.0,1.0,1.0,1.0,1.0	1.0,1.0,1.0,1.0,1.0	-0.011	SE
565	Choren_v00_mik.OX359201.1G143	NA	chrOX359201.1	-	641453	641516	641089	641173	641604	641704	565	0,48,228,22,61,13,45,40	0,0,0,0,0,0,0,0	45,9,339,142,362	0,0,4,0,0	212	149	1	1	NA,1.0,1.0,1.0,1.0,1.0,1.0,1.0	1.0,1.0,0.983,1.0,1.0	0.003	SE
567	Choren_v00_mik.OX359201.1G127	NA	chrOX359201.1	+	599979	600036	599779	599859	600193	600230	567	0,8,85,1,6,13,2,0	0,0,0,0,0,0,0,0	0,15,782,183,1047	0,0,0,0,2	206	149	1	1	NA,1.0,1.0,1.0,1.0,1.0,1.0,NA	NA,1.0,1.0,1.0,0.997	0.001	SE
568	Choren_v00_mik.OX359201.1G121	NA	chrOX359201.1	-	569376	569528	568322	568656	569932	570064	568	4,181,237,146,42,106,263,109	0,0,4,0,0,0,0,0	36,27,167,120,94	0,0,2,0,0	298	149	1	1	1.0,1.0,0.967,1.0,1.0,1.0,1.0,1.0	1.0,1.0,0.977,1.0,1.0	0	SE
569	Choren_v00_mik.OX359202.1G794	NA	chrOX359202.1	+	5637867	5638060	5637474	5637752	5638193	5638298	569	1.26851e+23	0,0,0,0,0,0,0,0	506168877512427	1,0,0,0,0	298	149	1	1	1.0,1.0,1.0,1.0,1.0,1.0,1.0,1.0	0.996,1.0,1.0,1.0,1.0	0.001	SE
570	Choren_v00_mik.OX359201.1G106	NA	chrOX359201.1	-	512323	512431	511529	511643	512700	512848	570	0,32,173,25,24,7,8,15	0,1,0,0,0,0,0,0	38,4,18,9,5	0,0,0,2,0	257	149	1	1	NA,0.949,1.0,1.0,1.0,1.0,1.0,1.0	1.0,1.0,1.0,0.723,1.0	0.048	SE
571	Choren_v00_mik.OX359201.1G86	NA	chrOX359201.1	-	422161	422231	421556	421894	422381	422491	571	0,0,12,0,8,3,2,0	0,0,0,0,0,0,0,0	0,0,628,30,1633	0,0,3,0,2	219	149	1	1	NA,NA,1.0,NA,1.0,1.0,1.0,NA	NA,NA,0.993,1.0,0.998	0.003	SE
572	Choren_v00_mik.OX359201.1G82	NA	chrOX359201.1	-	415127	415523	414697	415024	415941	416026	572	1,5,8,10,21,10,18,11	0,0,0,0,0,0,1,0	23,22,7,18,33	0,0,0,0,0	298	149	1	1	1.0,1.0,1.0,1.0,1.0,1.0,0.9,1.0	1.0,1.0,1.0,1.0,1.0	-0.012	SE
573	Choren_v00_mik.OX359201.1G73	NA	chrOX359201.1	+	368603	368741	368184	368313	371177	371250	573	0,30,392,61,67,18,62,69	0,0,0,0,0,0,0,2	90,38,763,411,722	0,0,0,0,0	287	149	1	1	NA,1.0,1.0,1.0,1.0,1.0,1.0,0.947	1.0,1.0,1.0,1.0,1.0	-0.008	SE
574	Choren_v00_mik.OX359201.1G73	NA	chrOX359201.1	+	372662	372733	371807	371875	373233	373327	574	0,77,253,87,152,42,94,33	0,0,0,0,0,0,0,0	47,29,562,412,428	0,0,0,3,0	220	149	1	1	NA,1.0,1.0,1.0,1.0,1.0,1.0,1.0	1.0,1.0,1.0,0.989,1.0	0.002	SE
575	Choren_v00_mik.OX359201.1G62	NA	chrOX359201.1	-	306655	306775	304936	305056	306911	306977	575	0,0,0,0,0,0,0,0	0,0,2,0,4,0,0,0	0,5,0,0,0	0,0,14,0,37	269	149	1	1	NA,NA,0.0,NA,0.0,NA,NA,NA	NA,1.0,0.0,NA,0.0	-0.333	SE
576	Choren_v00_mik.OX359201.1G49	NA	chrOX359201.1	-	231516	231654	231171	231240	231786	231888	576	0,24,66,9,29,5,29,3	0,0,0,0,2,0,0,0	14,12,0,52,7	0,0,0,0,0	287	149	1	1	NA,1.0,1.0,1.0,0.883,1.0,1.0,1.0	1.0,1.0,NA,1.0,1.0	-0.017	SE
577	Choren_v00_mik.OX359202.1G880	NA	chrOX359202.1	+	6222884	6222921	6222625	6222706	6223083	6223258	577	3.18226e+21	0,2,1,0,0,0,0,0	150,57,144,134,61	0,1,0,0,0	186	149	1	1	1.0,0.986,0.995,1.0,1.0,1.0,1.0,1.0	1.0,0.979,1.0,1.0,1.0	0.002	SE
578	Choren_v00_mik.OX359201.1G29	NA	chrOX359201.1	-	128979	129085	128440	128651	131252	131549	578	5,31,67,233,147,9,494,113	0,0,0,0,0,0,1,0	82,68,31,9,6	0,0,0,0,0	255	149	1	1	1.0,1.0,1.0,1.0,1.0,1.0,0.997,1.0	1.0,1.0,1.0,1.0,1.0	0	SE
579	Choren_v00_mik.OX359201.1G28	NA	chrOX359201.1	-	124611	124711	124055	124192	124924	125224	579	0,0,11,4,18,0,15,4	0,0,0,2,0,0,0,0	1,1,0,47,0	0,0,0,1,0	249	149	1	1	NA,NA,1.0,0.545,1.0,NA,1.0,1.0	1.0,1.0,NA,0.966,NA	-0.08	SE
580	Choren_v00_mik.OX359201.1G26	NA	chrOX359201.1	-	110113	110150	110039	110043	110205	110237	580	0,3,0,18,15,1,99,16	0,0,0,0,0,0,2,0	0,20,0,0,0	0,0,0,0,0	186	149	1	1	NA,1.0,NA,1.0,1.0,1.0,0.975,1.0	NA,1.0,NA,NA,NA	-0.004	SE
581	Choren_v00_mik.OX359202.1G564	NA	chrOX359202.1	-	4115933	4116002	4115717	4115858	4116379	4116552	581	6.14127e+21	0,0,0,0,0,0,1,0	169,29,61,56,32	2,0,0,1,0	218	149	1	1	1.0,1.0,1.0,1.0,1.0,1.0,0.995,1.0	0.983,1.0,1.0,0.975,1.0	0.008	SE
582	Choren_v00_mik.OX359202.1G564	NA	chrOX359202.1	-	4117238	4117346	4116638	4116792	4117661	4117724	582	0,69,143,95,73,68,37,58	0,0,2,0,0,0,0,0	17,17,19,19,4	0,0,0,0,1	257	149	1	1	NA,1.0,0.976,1.0,1.0,1.0,1.0,1.0	1.0,1.0,1.0,1.0,0.699	0.057	SE
583	Choren_v00_mik.OX359202.1G564	NA	chrOX359202.1	-	4117420	4117480	4117238	4117346	4117661	4117724	583	1,105,196,103,93,51,54,69	0,0,1,0,0,0,0,0	91,23,13,46,19	0,0,0,0,0	209	149	1	1	1.0,1.0,0.993,1.0,1.0,1.0,1.0,1.0	1.0,1.0,1.0,1.0,1.0	-0.001	SE
585	Choren_v00_mik.OX359202.1G564	NA	chrOX359202.1	-	4120872	4120902	4120563	4120625	4122720	4123045	585	0,1,115,109,41,35,0,49	0,0,0,0,0,2,0,0	2,0,0,12,0	0,0,0,0,0	179	149	1	1	NA,1.0,1.0,1.0,1.0,0.936,NA,1.0	1.0,NA,NA,1.0,NA	-0.011	SE
586	Choren_v00_mik.OX359201.1G16	NA	chrOX359201.1	+	99808	99871	99567	99645	99935	100031	586	1,131,351,133,80,109,138,108	0,0,0,0,1,0,0,0	98,48,124,118,129	0,0,0,0,0	212	149	1	1	1.0,1.0,1.0,1.0,0.983,1.0,1.0,1.0	1.0,1.0,1.0,1.0,1.0	-0.002	SE
587	Choren_v00_mik.OX359201.1G16	NA	chrOX359201.1	+	101802	101864	101634	101712	102001	102157	587	0,99,253,150,25,77,50,87	0,0,0,0,0,0,0,0	109,16,93,79,50	0,0,8,0,0	211	149	1	1	NA,1.0,1.0,1.0,1.0,1.0,1.0,1.0	1.0,1.0,0.891,1.0,1.0	0.022	SE
589	Choren_v00_mik.OX359201.1G9	NA	chrOX359201.1	+	58058	58169	57925	57983	58231	58271	589	0,40,220,62,9,24,46,24	0,1,11,0,4,0,2,0	31,25,576,280,905	0,0,22,0,13	260	149	1	1	NA,0.958,0.92,1.0,0.563,1.0,0.929,1.0	1.0,1.0,0.938,1.0,0.976	-0.073	SE
590	Choren_v00_mik.OX359201.1G9	NA	chrOX359201.1	+	58722	58824	58329	58622	58886	58992	590	0,32,134,45,0,0,0,0	0,3,16,19,0,0,0,0	0,0,0,0,411	0,0,0,0,227	251	149	1	1	NA,0.864,0.833,0.584,NA,NA,NA,NA	NA,NA,NA,NA,0.518	0.242	SE
591	Choren_v00_mik.OX359201.1G7	NA	chrOX359201.1	-	18545	18644	18365	18491	18716	18753	591	0,4,101,16,0,4,15,0	0,0,0,0,0,0,3,0	1,0,1,2,3	0,0,0,0,0	248	149	1	1	NA,1.0,1.0,1.0,NA,1.0,0.75,NA	1.0,NA,1.0,1.0,1.0	-0.05	SE
592	Choren_v00_mik.OX359200.1G1103	NA	chrOX359200.1	+	7515158	7515237	7513891	7514619	7515423	7515609	592	4.34555e+21	0,6,4,0,0,0,0,3	328,75,185,81,131	0,0,5,1,0	228	149	1	1	1.0,0.974,0.989,1.0,1.0,1.0,1.0,0.982	1.0,1.0,0.96,0.981,1.0	0.005	SE
593	Choren_v00_mik.OX359200.1G1113	NA	chrOX359200.1	-	7498877	7499020	7498737	7498821	7499075	7499193	593	3.16882e+21	0,0,0,0,0,0,0,0	2.0711e+17	0,0,2,0,1	292	149	1	1	1.0,1.0,1.0,1.0,1.0,1.0,1.0,1.0	1.0,1.0,0.998,1.0,0.999	0.001	SE
594	Choren_v00_mik.OX359200.1G1110	NA	chrOX359200.1	-	7480206	7480310	7479796	7479926	7480412	7480502	594	2.76723e+22	0,0,0,0,0,0,0,0	371135172663137	0,0,0,1,0	253	149	1	1	1.0,1.0,1.0,1.0,1.0,1.0,1.0,1.0	1.0,1.0,1.0,0.997,1.0	0.001	SE
595	Choren_v00_mik.OX359200.1G1084	NA	chrOX359200.1	+	7461491	7461623	7461065	7461347	7461680	7461845	595	1.41729e+26	0,0,0,0,3,0,0,0	832456444636258	0,0,0,0,0	281	149	1	1	1.0,1.0,1.0,1.0,0.993,1.0,1.0,1.0	1.0,1.0,1.0,1.0,1.0	-0.001	SE
596	Choren_v00_mik.OX359200.1G1081	NA	chrOX359200.1	+	7451744	7451852	7451333	7451680	7452022	7452200	596	2,263,559,270,7,208,682,7	0,2,2,0,0,0,0,0	35,158,43,39,131	0,0,0,0,0	257	149	1	1	1.0,0.987,0.994,1.0,1.0,1.0,1.0,1.0	1.0,1.0,1.0,1.0,1.0	-0.002	SE
597	Choren_v00_mik.OX359200.1G1085	NA	chrOX359200.1	-	7416727	7416859	7416577	7416654	7417219	7417351	597	1.77072e+23	0,0,5,0,0,0,1,0	7.12173e+16	0,2,0,1,0	281	149	1	1	1.0,1.0,0.995,1.0,1.0,1.0,0.998,1.0	1.0,0.979,1.0,0.998,1.0	0.004	SE
598	Choren_v00_mik.OX359200.1G1074	NA	chrOX359200.1	+	7351780	7351863	7351592	7351726	7351917	7352058	598	3,108,93,190,67,97,166,45	0,1,2,2,0,0,0,0	220,31,40,25,7	0,0,0,0,0	232	149	1	1	1.0,0.986,0.968,0.984,1.0,1.0,1.0,1.0	1.0,1.0,1.0,1.0,1.0	-0.008	SE
599	Choren_v00_mik.OX359200.1G1068	NA	chrOX359200.1	+	7341002	7341212	7340804	7340927	7341266	7341400	599	0,143,248,69,84,54,125,77	0,0,0,0,0,0,2,0	94,33,271,137,52	0,0,0,0,0	298	149	1	1	NA,1.0,1.0,1.0,1.0,1.0,0.969,1.0	1.0,1.0,1.0,1.0,1.0	-0.004	SE
600	Choren_v00_mik.OX359200.1G1069	NA	chrOX359200.1	-	7304939	7305040	7304784	7304875	7305100	7305147	600	4,82,572,188,163,140,267,101	0,0,0,0,2,0,0,0	179,23,242,229,101	0,0,2,0,0	250	149	1	1	1.0,1.0,1.0,1.0,0.98,1.0,1.0,1.0	1.0,1.0,0.986,1.0,1.0	0	SE
602	Choren_v00_mik.OX359200.1G1069	NA	chrOX359200.1	-	7315900	7315995	7315612	7315760	7316959	7317027	602	3,29,303,50,50,85,30,86	0,0,2,0,0,0,0,0	48,7,65,56,31	0,0,0,0,0	244	149	1	1	1.0,1.0,0.989,1.0,1.0,1.0,1.0,1.0	1.0,1.0,1.0,1.0,1.0	-0.001	SE
604	Choren_v00_mik.OX359200.1G1057	NA	chrOX359200.1	+	7249541	7249641	7249004	7249177	7249737	7249818	604	0,21,112,28,28,20,20,20	0,1,0,0,0,0,0,0	12,14,30,29,58	0,0,7,0,0	249	149	1	1	NA,0.926,1.0,1.0,1.0,1.0,1.0,1.0	1.0,1.0,0.719,1.0,1.0	0.046	SE
605	Choren_v00_mik.OX359200.1G1042	NA	chrOX359200.1	+	7169436	7169494	7169025	7169135	7169660	7169707	605	1.22013e+22	0,0,0,1,0,0,0,0	1.25149e+17	0,0,0,0,0	207	149	1	1	1.0,1.0,1.0,0.995,1.0,1.0,1.0,1.0	1.0,1.0,1.0,1.0,1.0	-0.001	SE
606	Choren_v00_mik.OX359200.1G1016	NA	chrOX359200.1	-	7024644	7024718	7024519	7024581	7024848	7025003	606	1,122,242,140,107,110,336,68	0,0,0,0,0,0,0,0	128,71,445,237,411	0,0,0,1,0	223	149	1	1	1.0,1.0,1.0,1.0,1.0,1.0,1.0,1.0	1.0,1.0,1.0,0.994,1.0	0.001	SE
607	Choren_v00_mik.OX359200.1G1016	NA	chrOX359200.1	-	7025724	7025783	7025417	7025533	7025998	7026092	607	1,86,278,84,37,74,155,40	0,0,3,0,0,0,0,1	60,36,164,122,289	0,0,0,0,0	208	149	1	1	1.0,1.0,0.985,1.0,1.0,1.0,1.0,0.966	1.0,1.0,1.0,1.0,1.0	-0.006	SE
608	Choren_v00_mik.OX359200.1G1016	NA	chrOX359200.1	-	7029457	7029545	7028622	7028862	7029705	7029788	608	0,72,151,22,50,67,102,28	0,1,2,0,0,0,2,0	41,41,251,55,154	0,0,0,0,0	237	149	1	1	NA,0.978,0.979,1.0,1.0,1.0,0.97,1.0	1.0,1.0,1.0,1.0,1.0	-0.01	SE
609	Choren_v00_mik.OX359200.1G1016	NA	chrOX359200.1	-	7029705	7029788	7029457	7029545	7030279	7030573	609	0,73,192,23,55,65,110,38	0,0,1,0,0,0,2,0	34,28,292,89,221	0,0,0,0,0	232	149	1	1	NA,1.0,0.992,1.0,1.0,1.0,0.972,1.0	1.0,1.0,1.0,1.0,1.0	-0.005	SE
610	Choren_v00_mik.OX359200.1G1016	NA	chrOX359200.1	-	7030279	7030573	7029705	7029788	7032117	7032258	610	4,99,298,18,103,57,184,59	0,0,0,0,0,1,0,0	23,32,465,148,395	0,0,0,0,0	298	149	1	1	1.0,1.0,1.0,1.0,1.0,0.966,1.0,1.0	1.0,1.0,1.0,1.0,1.0	-0.004	SE
612	Choren_v00_mik.OX359200.1G1016	NA	chrOX359200.1	-	7033970	7034057	7033539	7033593	7034478	7034600	612	1,46,127,19,21,23,51,15	0,0,0,0,0,0,0,0	9,27,142,96,155	0,0,2,0,0	236	149	1	1	1.0,1.0,1.0,1.0,1.0,1.0,1.0,1.0	1.0,1.0,0.978,1.0,1.0	0.004	SE
613	Choren_v00_mik.OX359200.1G996	NA	chrOX359200.1	+	6952610	6952704	6952335	6952446	6952795	6952889	613	0,9,166,4,14,16,10,23	0,0,1,0,0,0,0,0	12,15,10,44,10	0,0,0,0,0	243	149	1	1	NA,1.0,0.99,1.0,1.0,1.0,1.0,1.0	1.0,1.0,1.0,1.0,1.0	-0.001	SE
614	Choren_v00_mik.OX359200.1G995	NA	chrOX359200.1	+	6947702	6947763	6947604	6947635	6947893	6947957	614	0,19,94,12,69,12,29,10	0,0,0,0,0,0,0,0	12,22,957,508,1649	0,0,7,0,14	210	149	1	1	NA,1.0,1.0,1.0,1.0,1.0,1.0,1.0	1.0,1.0,0.99,1.0,0.988	0.004	SE
615	Choren_v00_mik.OX359200.1G995	NA	chrOX359200.1	+	6947893	6947957	6947702	6947763	6948103	6948211	615	0,48,87,23,58,31,34,12	0,0,0,0,0,0,0,0	27,24,1197,621,1850	0,0,0,0,2	213	149	1	1	NA,1.0,1.0,1.0,1.0,1.0,1.0,1.0	1.0,1.0,1.0,1.0,0.998	0	SE
616	Choren_v00_mik.OX359200.1G992	NA	chrOX359200.1	+	6932590	6932716	6932052	6932161	6932852	6932972	616	8.24756e+21	0,0,1,0,0,0,0,0	438,84,74,275,112	0,0,0,0,0	275	149	1	1	1.0,1.0,0.997,1.0,1.0,1.0,1.0,1.0	1.0,1.0,1.0,1.0,1.0	0	SE
617	Choren_v00_mik.OX359200.1G978	NA	chrOX359200.1	+	6845466	6845540	6845202	6845351	6845852	6845955	617	0,2,25,22,50,3,36,56	0,0,0,1,0,0,0,0	2,11,33,33,6	0,0,0,0,0	223	149	1	1	NA,1.0,1.0,0.936,1.0,1.0,1.0,1.0	1.0,1.0,1.0,1.0,1.0	-0.009	SE
619	Choren_v00_mik.OX359200.1G958	NA	chrOX359200.1	-	6743107	6743186	6742958	6743015	6743522	6743692	619	0,0,0,16,0,0,0,59	0,0,0,0,0,0,0,1	0,0,59,0,0	0,0,0,0,0	228	149	1	1	NA,NA,NA,1.0,NA,NA,NA,0.975	NA,NA,1.0,NA,NA	-0.012	SE
620	Choren_v00_mik.OX359200.1G952	NA	chrOX359200.1	-	6644608	6644685	6643942	6644461	6644800	6645140	620	0,35,42,18,0,3,31,0	0,0,0,0,0,0,0,0	9,16,50,6,0	0,0,1,0,0	226	149	1	1	NA,1.0,1.0,1.0,NA,1.0,1.0,NA	1.0,1.0,0.971,1.0,NA	0.007	SE
621	Choren_v00_mik.OX359200.1G947	NA	chrOX359200.1	-	6574502	6574678	6574164	6574348	6580550	6580684	621	5,40,347,54,89,54,55,22	0,0,0,0,0,0,0,0	41,10,23,41,9	0,0,2,0,0	298	149	1	1	1.0,1.0,1.0,1.0,1.0,1.0,1.0,1.0	1.0,1.0,0.852,1.0,1.0	0.03	SE
622	Choren_v00_mik.OX359200.1G945	NA	chrOX359200.1	-	6570343	6570400	6569303	6569903	6570772	6570863	622	0,250,1743,108,465,319,93,66	0,0,2,0,2,0,4,2	31,24,396,479,290	0,0,0,0,0	206	149	1	1	NA,1.0,0.998,1.0,0.994,1.0,0.944,0.96	1.0,1.0,1.0,1.0,1.0	-0.015	SE
623	Choren_v00_mik.OX359200.1G945	NA	chrOX359200.1	-	6570772	6570863	6570343	6570400	6571166	6571424	623	0,288,1999,107,406,338,91,73	0,0,0,0,0,0,0,0	45,15,381,615,336	0,0,0,2,0	240	149	1	1	NA,1.0,1.0,1.0,1.0,1.0,1.0,1.0	1.0,1.0,1.0,0.995,1.0	0.001	SE
624	Choren_v00_mik.OX359200.1G941	NA	chrOX359200.1	-	6548586	6548709	6548318	6548398	6549370	6549510	624	2.19933e+25	0,0,2,0,0,2,0,0	668286853648391	0,0,0,0,0	272	149	1	1	1.0,1.0,0.999,1.0,1.0,0.995,1.0,1.0	1.0,1.0,1.0,1.0,1.0	-0.001	SE
625	Choren_v00_mik.OX359201.1G773	NA	chrOX359201.1	+	5771415	5771588	5771087	5771211	5772333	5772457	625	3,249,476,93,197,238,198,58	0,1,0,0,0,0,0,0	102,48,451,265,188	0,0,0,0,0	298	149	1	1	1.0,0.992,1.0,1.0,1.0,1.0,1.0,1.0	1.0,1.0,1.0,1.0,1.0	-0.001	SE
626	Choren_v00_mik.OX359201.1G773	NA	chrOX359201.1	+	5772977	5773034	5772333	5772457	5773123	5773192	626	2.1731e+22	0,0,3,2,2,2,0,0	98,30,342,369,483	0,0,1,0,10	206	149	1	1	1.0,1.0,0.996,0.985,0.988,0.979,1.0,1.0	1.0,1.0,0.996,1.0,0.972	0	SE
627	Choren_v00_mik.OX359200.1G914	NA	chrOX359200.1	+	6469925	6470049	6469639	6469792	6471457	6471767	627	0,82,371,116,140,50,83,60	0,0,0,2,1,0,0,0	48,4,50,27,10	0,0,0,0,0	273	149	1	1	NA,1.0,1.0,0.969,0.987,1.0,1.0,1.0	1.0,1.0,1.0,1.0,1.0	-0.006	SE
628	Choren_v00_mik.OX359200.1G914	NA	chrOX359200.1	+	6469925	6470122	6469639	6469792	6471457	6471767	628	0,31,148,18,23,18,30,14	0,0,0,2,1,0,0,0	15,0,6,4,4	0,0,0,0,0	298	149	1	1	NA,1.0,1.0,0.818,0.92,1.0,1.0,1.0	1.0,NA,1.0,1.0,1.0	-0.037	SE
629	Choren_v00_mik.OX359200.1G912	NA	chrOX359200.1	-	6450633	6450818	6449972	6450066	6451113	6451195	629	2.71113e+29	0,0,0,0,6,0,0,0	1.75452e+17	0,0,0,0,0	298	149	1	1	1.0,1.0,1.0,1.0,0.989,1.0,1.0,1.0	1.0,1.0,1.0,1.0,1.0	-0.001	SE
631	Choren_v00_mik.OX359200.1G911	NA	chrOX359200.1	-	6440198	6440267	6439144	6439913	6440830	6440947	631	3,27,43,56,62,36,80,29	0,0,0,0,1,0,0,0	58,21,23,24,14	0,0,0,0,0	218	149	1	1	1.0,1.0,1.0,1.0,0.977,1.0,1.0,1.0	1.0,1.0,1.0,1.0,1.0	-0.003	SE
632	Choren_v00_mik.OX359200.1G906	NA	chrOX359200.1	-	6410771	6410888	6410171	6410309	6411272	6411328	632	3.30261e+21	0,0,2,0,0,0,0,0	291100309377214	0,1,0,0,0	266	149	1	1	1.0,1.0,0.994,1.0,1.0,1.0,1.0,1.0	1.0,0.982,1.0,1.0,1.0	0.003	SE
633	Choren_v00_mik.OX359200.1G899	NA	chrOX359200.1	+	6371732	6371900	6371427	6371470	6372477	6372561	633	0,211,474,172,173,200,56,79	0,0,1,0,0,0,0,0	58,43,117,215,92	0,0,0,0,0	298	149	1	1	NA,1.0,0.996,1.0,1.0,1.0,1.0,1.0	1.0,1.0,1.0,1.0,1.0	-0.001	SE
634	Choren_v00_mik.OX359200.1G899	NA	chrOX359200.1	+	6374561	6374702	6374434	6374493	6374985	6375026	634	0,195,75,5,136,122,41,5	0,0,0,0,0,0,6,0	7,31,0,141,56	0,0,0,0,0	290	149	1	1	NA,1.0,1.0,1.0,1.0,1.0,0.778,1.0	1.0,1.0,NA,1.0,1.0	-0.032	SE
635	Choren_v00_mik.OX359200.1G899	NA	chrOX359200.1	+	6378657	6378790	6378119	6378271	6379117	6379222	635	0,38,77,34,28,118,206,48	0,0,0,0,0,0,0,0	20,33,26,133,50	0,0,0,0,1	282	149	1	1	NA,1.0,1.0,1.0,1.0,1.0,1.0,1.0	1.0,1.0,1.0,1.0,0.964	0.007	SE
636	Choren_v00_mik.OX359200.1G879	NA	chrOX359200.1	+	6254505	6254711	6254228	6254291	6255143	6255252	636	3,25,149,52,23,61,100,20	0,0,2,0,0,0,0,0	58,14,68,28,44	0,0,0,0,1	298	149	1	1	1.0,1.0,0.974,1.0,1.0,1.0,1.0,1.0	1.0,1.0,1.0,1.0,0.957	0.005	SE
637	Choren_v00_mik.OX359200.1G875	NA	chrOX359200.1	-	6217709	6217837	6217284	6217617	6217906	6218225	637	0,12,17,2,8,1,6,2	0,0,0,0,0,0,0,0	0,1,0,9,0	0,0,0,2,0	277	149	1	1	NA,1.0,1.0,1.0,1.0,1.0,1.0,1.0	NA,1.0,NA,0.708,NA	0.146	SE
638	Choren_v00_mik.OX359200.1G865	NA	chrOX359200.1	+	6185287	6185386	6184598	6184773	6185444	6185617	638	0,30,125,32,54,11,30,26	0,0,0,0,1,2,0,0	32,5,10,29,19	0,0,0,0,3	248	149	1	1	NA,1.0,1.0,1.0,0.97,0.768,1.0,1.0	1.0,1.0,1.0,1.0,0.792	0.004	SE
639	Choren_v00_mik.OX359200.1G865	NA	chrOX359200.1	+	6185306	6185386	6184598	6184773	6185444	6185617	639	2,130,559,167,138,47,97,138	0,0,0,0,1,2,0,0	91,29,16,96,92	0,0,0,0,3	229	149	1	1	1.0,1.0,1.0,1.0,0.989,0.939,1.0,1.0	1.0,1.0,1.0,1.0,0.952	0.001	SE
640	Choren_v00_mik.OX359200.1G859	NA	chrOX359200.1	-	6158375	6158481	6158256	6158310	6159099	6159170	640	1,62,416,71,48,61,52,45	0,0,0,0,0,0,0,0	19,2,111,65,68	0,0,0,0,1	255	149	1	1	1.0,1.0,1.0,1.0,1.0,1.0,1.0,1.0	1.0,1.0,1.0,1.0,0.975	0.005	SE
641	Choren_v00_mik.OX359200.1G858	NA	chrOX359200.1	-	6155957	6156094	6155479	6155636	6156405	6156539	641	12,126,866,161,53,166,519,115	0,0,0,0,0,0,0,1	139,98,220,208,71	0,0,0,0,0	286	149	1	1	1.0,1.0,1.0,1.0,1.0,1.0,1.0,0.984	1.0,1.0,1.0,1.0,1.0	-0.002	SE
642	Choren_v00_mik.OX359200.1G852	NA	chrOX359200.1	+	6121944	6122240	6121742	6121861	6122331	6122503	642	1,122,468,263,244,88,161,124	0,0,2,0,0,0,0,0	483,29,266,44,10	0,0,0,0,0	298	149	1	1	1.0,1.0,0.992,1.0,1.0,1.0,1.0,1.0	1.0,1.0,1.0,1.0,1.0	-0.001	SE
643	Choren_v00_mik.OX359200.1G839	NA	chrOX359200.1	+	6084817	6084976	6084112	6084180	6085231	6085576	643	0,314,1166,134,213,203,310,148	0,0,0,0,0,0,0,0	142,50,922,410,889	0,0,2,0,0	298	149	1	1	NA,1.0,1.0,1.0,1.0,1.0,1.0,1.0	1.0,1.0,0.996,1.0,1.0	0.001	SE
644	Choren_v00_mik.OX359200.1G839	NA	chrOX359200.1	+	6085231	6085576	6084817	6084976	6085991	6086123	644	2.27912e+22	0,1,0,0,0,0,0,0	136,51,950,362,1015	0,0,0,0,0	298	149	1	1	1.0,0.993,1.0,1.0,1.0,1.0,1.0,1.0	1.0,1.0,1.0,1.0,1.0	-0.001	SE
646	Choren_v00_mik.OX359200.1G842	NA	chrOX359200.1	-	6071752	6071821	6071191	6071300	6071917	6072026	646	4,221,389,84,79,239,104,211	0,1,0,0,0,0,0,0	33,19,108,150,153	0,0,0,0,0	218	149	1	1	1.0,0.993,1.0,1.0,1.0,1.0,1.0,1.0	1.0,1.0,1.0,1.0,1.0	-0.001	SE
647	Choren_v00_mik.OX359200.1G842	NA	chrOX359200.1	-	6071917	6072026	6071752	6071821	6072095	6072190	647	8.48112e+22	0,0,0,0,0,0,0,0	119,73,243,229,173	0,0,0,2,0	258	149	1	1	1.0,1.0,1.0,1.0,1.0,1.0,1.0,1.0	1.0,1.0,1.0,0.985,1.0	0.003	SE
648	Choren_v00_mik.OX359200.1G830	NA	chrOX359200.1	-	6004648	6004715	6004101	6004402	6005291	6005377	648	0,33,86,113,24,32,230,43	0,0,0,0,0,0,1,0	67,13,30,183,33	1,0,0,0,0	216	149	1	1	NA,1.0,1.0,1.0,1.0,1.0,0.994,1.0	0.979,1.0,1.0,1.0,1.0	0.003	SE
652	Choren_v00_mik.OX359200.1G822	NA	chrOX359200.1	+	5955098	5955185	5954930	5955041	5955502	5955506	652	3.32784e+21	0,0,1,1,0,0,0,2	140,34,118,224,68	0,0,0,0,0	236	149	1	1	1.0,1.0,0.998,0.994,1.0,1.0,1.0,0.989	1.0,1.0,1.0,1.0,1.0	-0.002	SE
653	Choren_v00_mik.OX359200.1G818	NA	chrOX359200.1	-	5930453	5930484	5930232	5930390	5930665	5930787	653	0,23,65,10,18,7,27,11	0,0,2,0,0,0,0,0	18,2,15,22,0	0,0,0,0,0	180	149	1	1	NA,1.0,0.964,1.0,1.0,1.0,1.0,1.0	1.0,1.0,1.0,1.0,NA	-0.005	SE
654	Choren_v00_mik.OX359200.1G812	NA	chrOX359200.1	+	5916837	5917009	5916228	5916314	5917445	5917632	654	0,134,185,69,61,39,208,77	0,0,0,0,0,0,0,0	51,25,129,24,247	0,0,0,0,1	298	149	1	1	NA,1.0,1.0,1.0,1.0,1.0,1.0,1.0	1.0,1.0,1.0,1.0,0.992	0.002	SE
655	Choren_v00_mik.OX359200.1G801	NA	chrOX359200.1	-	5827606	5827698	5826905	5827067	5828079	5828219	655	5,1,515,213,234,139,12,132	0,0,0,0,0,0,0,0	158,39,21,126,4	1,0,0,0,0	241	149	1	1	1.0,1.0,1.0,1.0,1.0,1.0,1.0,1.0	0.99,1.0,1.0,1.0,1.0	0.002	SE
656	Choren_v00_mik.OX359200.1G801	NA	chrOX359200.1	-	5828079	5828219	5827606	5827698	5828644	5828691	656	4,0,646,285,305,164,0,175	0,0,3,0,0,0,0,0	229,34,3,130,0	2,0,0,0,0	289	149	1	1	1.0,NA,0.991,1.0,1.0,1.0,NA,1.0	0.983,1.0,1.0,1.0,NA	0.003	SE
657	Choren_v00_mik.OX359200.1G800	NA	chrOX359200.1	-	5825165	5825226	5824583	5824921	5825631	5825726	657	1,56,769,210,106,175,90,201	0,0,0,0,0,0,0,0	146,40,39,44,7	0,0,0,1,0	210	149	1	1	1.0,1.0,1.0,1.0,1.0,1.0,1.0,1.0	1.0,1.0,1.0,0.969,1.0	0.006	SE
658	Choren_v00_mik.OX359200.1G783	NA	chrOX359200.1	+	5725216	5725298	5724963	5725015	5725576	5725667	658	3,209,781,149,207,83,86,155	0,0,1,0,0,0,0,0	82,42,130,90,312	0,0,0,0,0	231	149	1	1	1.0,1.0,0.998,1.0,1.0,1.0,1.0,1.0	1.0,1.0,1.0,1.0,1.0	0	SE
659	Choren_v00_mik.OX359200.1G783	NA	chrOX359200.1	+	5725576	5725667	5725216	5725298	5725783	5725897	659	6.24484e+21	0,0,0,0,0,0,0,0	104,50,157,123,352	0,0,0,0,3	240	149	1	1	1.0,1.0,1.0,1.0,1.0,1.0,1.0,1.0	1.0,1.0,1.0,1.0,0.986	0.003	SE
661	Choren_v00_mik.OX359200.1G758	NA	chrOX359200.1	+	5499277	5499691	5497097	5497188	5503496	5503790	661	1.79563e+23	0,0,1,1,0,0,0,0	711325522207207	0,0,0,0,0	298	149	1	1	1.0,1.0,0.999,0.997,1.0,1.0,1.0,1.0	1.0,1.0,1.0,1.0,1.0	0	SE
662	Choren_v00_mik.OX359200.1G758	NA	chrOX359200.1	+	5503496	5503790	5499277	5499691	5505553	5505576	662	1.58842e+23	0,0,3,0,0,0,0,0	695246632191187	0,0,0,4,0	298	149	1	1	1.0,1.0,0.997,1.0,1.0,1.0,1.0,1.0	1.0,1.0,1.0,0.96,1.0	0.008	SE
663	Choren_v00_mik.OX359200.1G742	NA	chrOX359200.1	+	5399839	5399880	5399334	5399487	5401062	5401196	663	0,14,49,17,19,3,4,25	0,0,0,0,1,0,0,0	11,4,4,16,1	0,0,0,0,0	190	149	1	1	NA,1.0,1.0,1.0,0.937,1.0,1.0,1.0	1.0,1.0,1.0,1.0,1.0	-0.009	SE
664	Choren_v00_mik.OX359200.1G742	NA	chrOX359200.1	+	5400336	5400469	5399839	5399880	5401062	5401196	664	4.19758e+21	0,1,4,0,1,1,0,1	93,35,89,271,47	0,0,0,2,0	282	149	1	1	1.0,0.99,0.987,1.0,0.992,0.984,1.0,0.992	1.0,1.0,1.0,0.986,1.0	-0.004	SE
665	Choren_v00_mik.OX359200.1G742	NA	chrOX359200.1	+	5402585	5402608	5402115	5402280	5402889	5402984	665	5,234,381,155,116,121,94,111	0,0,2,0,0,1,2,5	72,47,65,69,57	0,0,0,2,4	172	149	1	1	1.0,1.0,0.994,1.0,1.0,0.991,0.976,0.951	1.0,1.0,1.0,0.968,0.925	0.01	SE
666	Choren_v00_mik.OX359200.1G736	NA	chrOX359200.1	+	5348736	5348873	5347947	5348116	5349162	5349277	666	0,63,318,85,77,60,19,22	0,0,0,2,0,0,0,0	30,10,95,36,43	0,0,0,0,0	286	149	1	1	NA,1.0,1.0,0.957,1.0,1.0,1.0,1.0	1.0,1.0,1.0,1.0,1.0	-0.006	SE
667	Choren_v00_mik.OX359200.1G736	NA	chrOX359200.1	+	5354483	5354602	5354348	5354398	5355113	5355299	667	5.65211e+22	0,0,0,0,0,2,6,0	375123307295222	0,0,0,0,0	268	149	1	1	1.0,1.0,1.0,1.0,1.0,0.991,0.983,1.0	1.0,1.0,1.0,1.0,1.0	-0.003	SE
668	Choren_v00_mik.OX359200.1G729	NA	chrOX359200.1	+	5284226	5284329	5284043	5284097	5285114	5285423	668	2,18,9,0,6,24,6,0	0,0,0,0,0,0,2,0	0,0,4,0,0	0,0,0,0,0	252	149	1	1	1.0,1.0,1.0,NA,1.0,1.0,0.639,NA	NA,NA,1.0,NA,NA	-0.06	SE
670	Choren_v00_mik.OX359200.1G719	NA	chrOX359200.1	+	5189877	5189963	5188126	5188155	5190033	5190261	670	2,83,82,32,11,54,98,59	0,2,0,0,0,0,0,0	12,26,13,17,7	0,0,0,0,0	235	149	1	1	1.0,0.963,1.0,1.0,1.0,1.0,1.0,1.0	1.0,1.0,1.0,1.0,1.0	-0.005	SE
671	Choren_v00_mik.OX359200.1G719	NA	chrOX359200.1	+	5192765	5192858	5192028	5192350	5194348	5194471	671	1,69,118,29,19,99,176,1	0,0,6,0,0,0,0,0	47,17,9,19,6	0,0,0,1,0	242	149	1	1	1.0,1.0,0.924,1.0,1.0,1.0,1.0,1.0	1.0,1.0,1.0,0.921,1.0	0.006	SE
672	Choren_v00_mik.OX359200.1G717	NA	chrOX359200.1	+	5167131	5167199	5166739	5166907	5167305	5167381	672	0,103,354,116,42,63,69,79	0,0,6,0,0,0,0,0	10,33,103,82,30	0,0,0,0,0	217	149	1	1	NA,1.0,0.976,1.0,1.0,1.0,1.0,1.0	1.0,1.0,1.0,1.0,1.0	-0.003	SE
673	Choren_v00_mik.OX359200.1G717	NA	chrOX359200.1	+	5167652	5167708	5167497	5167584	5167920	5168023	673	4,171,406,99,102,88,118,81	0,0,0,1,0,0,0,0	94,34,106,155,37	0,0,0,4,0	205	149	1	1	1.0,1.0,1.0,0.986,1.0,1.0,1.0,1.0	1.0,1.0,1.0,0.966,1.0	0.005	SE
674	Choren_v00_mik.OX359200.1G715	NA	chrOX359200.1	-	5142073	5142202	5141624	5141719	5142458	5142560	674	6,39,175,22,42,51,62,49	0,0,0,0,0,0,0,0	50,25,151,24,16	2,0,0,0,0	278	149	1	1	1.0,1.0,1.0,1.0,1.0,1.0,1.0,1.0	0.931,1.0,1.0,1.0,1.0	0.014	SE
675	Choren_v00_mik.OX359200.1G921	NA	chrOX359200.1	-	6497693	6497818	6497016	6497191	6497892	6497958	675	0,80,690,64,111,76,64,28	0,0,1,0,1,0,1,0	41,18,99,78,76	0,0,3,0,1	274	149	1	1	NA,1.0,0.997,1.0,0.984,1.0,0.972,1.0	1.0,1.0,0.947,1.0,0.976	0.009	SE
676	Choren_v00_mik.OX359200.1G675	NA	chrOX359200.1	-	4894379	4894460	4894201	4894265	4894523	4894616	676	0,2,4,2,1,0,0,0	2,0,0,0,0,0,0,0	0,0,2,0,0	0,0,0,0,0	230	149	1	1	0.0,1.0,1.0,1.0,1.0,NA,NA,NA	NA,NA,1.0,NA,NA	-0.2	SE
677	Choren_v00_mik.OX359202.1G332	NA	chrOX359202.1	+	1648444	1648528	1643160	1643352	1649004	1649190	677	0,11,25,1,7,1,0,16	0,0,4,0,0,0,0,1	1,1,13,7,17	0,0,0,0,0	233	149	1	1	NA,1.0,0.8,1.0,1.0,1.0,NA,0.911	1.0,1.0,1.0,1.0,1.0	-0.048	SE
678	Choren_v00_mik.OX359202.1G332	NA	chrOX359202.1	+	1649004	1649190	1643160	1643352	1649442	1649541	678	0,0,42,0,2,1,1,14	0,0,0,0,0,0,1,0	6,1,14,5,10	0,0,0,0,0	298	149	1	1	NA,NA,1.0,NA,1.0,1.0,0.333,1.0	1.0,1.0,1.0,1.0,1.0	-0.133	SE
679	Choren_v00_mik.OX359202.1G332	NA	chrOX359202.1	+	1650339	1650382	1650074	1650204	1651199	1651419	679	2,11,15,7,4,14,4,23	0,0,0,0,0,0,9,2	2,0,2,7,2	0,0,0,2,0	192	149	1	1	1.0,1.0,1.0,1.0,1.0,1.0,0.256,0.899	1.0,NA,1.0,0.731,1.0	-0.038	SE
680	Choren_v00_mik.OX359200.1G660	NA	chrOX359200.1	-	4810319	4810373	4810181	4810257	4810618	4810737	680	6,140,1060,258,206,53,98,215	0,0,0,0,0,0,0,0	112,7,3331,330,1982	0,0,0,0,2	203	149	1	1	1.0,1.0,1.0,1.0,1.0,1.0,1.0,1.0	1.0,1.0,1.0,1.0,0.999	0	SE
681	Choren_v00_mik.OX359200.1G660	NA	chrOX359200.1	-	4811367	4811401	4811206	4811304	4812057	4812155	681	0,48,236,104,50,45,10,154	0,2,0,0,0,0,0,0	25,27,3781,235,1373	0,0,0,0,0	183	149	1	1	NA,0.951,1.0,1.0,1.0,1.0,1.0,1.0	1.0,1.0,1.0,1.0,1.0	-0.007	SE
682	Choren_v00_mik.OX359200.1G654	NA	chrOX359200.1	+	4772865	4773058	4772330	4772412	4773722	4773906	682	0,30,35,8,3,3,10,2	0,3,0,0,0,0,0,0	9,1,2,28,11	0,0,1,0,0	298	149	1	1	NA,0.833,1.0,1.0,1.0,1.0,1.0,1.0	1.0,1.0,0.5,1.0,1.0	0.076	SE
683	Choren_v00_mik.OX359200.1G648	NA	chrOX359200.1	+	4751928	4752109	4751294	4751455	4752476	4752572	683	0,51,195,48,0,59,69,20	0,0,2,0,0,0,0,0	18,28,26,26,3	0,0,0,0,0	298	149	1	1	NA,1.0,0.98,1.0,NA,1.0,1.0,1.0	1.0,1.0,1.0,1.0,1.0	-0.003	SE
685	Choren_v00_mik.OX359200.1G652	NA	chrOX359200.1	-	4743785	4743862	4742842	4742921	4744590	4744636	685	1,2,487,0,38,75,59,2	0,0,0,0,0,0,0,0	0,0,3,69,30	0,0,0,0,2	226	149	1	1	1.0,1.0,1.0,NA,1.0,1.0,1.0,1.0	NA,NA,1.0,1.0,0.908	0.031	SE
686	Choren_v00_mik.OX359200.1G617	NA	chrOX359200.1	-	4496456	4496522	4495542	4495724	4497097	4497208	686	2.47032e+25	0,0,0,0,0,0,2,0	715173780638835	0,0,0,0,0	215	149	1	1	1.0,1.0,1.0,1.0,1.0,1.0,0.997,1.0	1.0,1.0,1.0,1.0,1.0	0	SE
687	Choren_v00_mik.OX359200.1G617	NA	chrOX359200.1	-	4497097	4497208	4496456	4496522	4497663	4497839	687	2.16341e+24	0,0,0,0,0,0,0,0	637159592500766	0,0,0,0,4	260	149	1	1	1.0,1.0,1.0,1.0,1.0,1.0,1.0,1.0	1.0,1.0,1.0,1.0,0.991	0.002	SE
688	Choren_v00_mik.OX359202.1G633	NA	chrOX359202.1	+	4733268	4733299	4733068	4733191	4733950	4734189	688	0,18,23,17,7,24,46,26	0,0,0,0,0,0,3,0	0,23,76,147,87	0,0,0,0,0	180	149	1	1	NA,1.0,1.0,1.0,1.0,1.0,0.927,1.0	NA,1.0,1.0,1.0,1.0	-0.01	SE
689	Choren_v00_mik.OX359200.1G608	NA	chrOX359200.1	+	4436601	4436657	4436158	4436258	4437499	4437596	689	0,355,747,210,287,113,130,91	0,3,3,0,0,2,0,0	80104208343198	0,0,0,0,0	205	149	1	1	NA,0.989,0.995,1.0,1.0,0.976,1.0,1.0	1.0,1.0,1.0,1.0,1.0	-0.006	SE
690	Choren_v00_mik.OX359200.1G608	NA	chrOX359200.1	+	4436601	4436657	4436158	4436258	4439297	4439429	690	0,49,181,32,33,22,24,4	0,0,9,0,0,0,0,0	26,19,40,69,39	0,0,0,4,0	205	149	1	1	NA,1.0,0.936,1.0,1.0,1.0,1.0,1.0	1.0,1.0,1.0,0.926,1.0	0.006	SE
691	Choren_v00_mik.OX359200.1G608	NA	chrOX359200.1	+	4436601	4436657	4436158	4436258	4442629	4442718	691	0,50,169,32,32,20,20,4	0,0,0,2,0,0,0,0	22,19,37,54,38	0,0,0,0,0	205	149	1	1	NA,1.0,1.0,0.921,1.0,1.0,1.0,1.0	1.0,1.0,1.0,1.0,1.0	-0.011	SE
692	Choren_v00_mik.OX359200.1G608	NA	chrOX359200.1	+	4437499	4437596	4436158	4436258	4439297	4439429	692	2,315,829,192,245,89,134,101	0,0,9,0,0,0,0,0	86,92,187,327,162	0,0,0,4,0	246	149	1	1	1.0,1.0,0.982,1.0,1.0,1.0,1.0,1.0	1.0,1.0,1.0,0.98,1.0	0.002	SE
693	Choren_v00_mik.OX359200.1G608	NA	chrOX359200.1	+	4437499	4437596	4436158	4436258	4442629	4442718	693	0,8,4,6,1,2,0,7	0,0,0,2,0,0,0,0	4,4,2,1,3	0,0,0,0,0	246	149	1	1	NA,1.0,1.0,0.645,1.0,1.0,NA,1.0	1.0,1.0,1.0,1.0,1.0	-0.059	SE
695	Choren_v00_mik.OX359200.1G608	NA	chrOX359200.1	+	4437499	4437596	4436601	4436657	4442629	4442718	695	0,213,413,143,155,66,80,56	0,4,11,0,0,2,0,0	50,63,131,200,119	0,0,0,1,0	246	149	1	1	NA,0.97,0.958,1.0,1.0,0.952,1.0,1.0	1.0,1.0,1.0,0.992,1.0	-0.016	SE
696	Choren_v00_mik.OX359200.1G608	NA	chrOX359200.1	+	4439297	4439429	4436158	4436258	4442629	4442718	696	3,287,1020,260,293,32,146,78	0,0,0,2,0,0,0,0	119145242328164	0,0,0,0,0	281	149	1	1	1.0,1.0,1.0,0.986,1.0,1.0,1.0,1.0	1.0,1.0,1.0,1.0,1.0	-0.002	SE
697	Choren_v00_mik.OX359200.1G608	NA	chrOX359200.1	+	4439297	4439429	4436601	4436657	4442629	4442718	697	3,290,1038,260,294,36,150,78	0,4,11,0,0,2,0,0	123145245338165	0,0,0,1,0	281	149	1	1	1.0,0.975,0.98,1.0,1.0,0.905,1.0,1.0	1.0,1.0,1.0,0.994,1.0	-0.016	SE
699	Choren_v00_mik.OX359200.1G608	NA	chrOX359200.1	+	4443378	4443597	4443141	4443278	4443699	4443788	699	13,591,776,585,297,253,486,72	0,0,0,1,0,0,0,1	140327268278174	0,0,0,0,0	298	149	1	1	1.0,1.0,1.0,0.997,1.0,1.0,1.0,0.973	1.0,1.0,1.0,1.0,1.0	-0.004	SE
700	Choren_v00_mik.OX359201.1G67	NA	chrOX359201.1	-	334380	334453	334033	334088	334514	334546	700	2,165,335,74,140,94,273,102	0,0,0,0,0,0,2,0	130,3,83,48,164	0,0,0,0,0	222	149	1	1	1.0,1.0,1.0,1.0,1.0,1.0,0.989,1.0	1.0,1.0,1.0,1.0,1.0	-0.001	SE
701	Choren_v00_mik.OX359200.1G595	NA	chrOX359200.1	-	4374256	4374364	4374113	4374179	4374467	4374596	701	0,651,53,124,5,17,32,18	0,0,2,2,0,0,0,0	5,3,6,10,0	0,0,0,0,0	257	149	1	1	NA,1.0,0.939,0.973,1.0,1.0,1.0,1.0	1.0,1.0,1.0,1.0,NA	-0.013	SE
702	Choren_v00_mik.OX359200.1G594	NA	chrOX359200.1	-	4368732	4368957	4365957	4366035	4369649	4369717	702	4.65018e+22	0,2,2,0,0,0,0,0	364172371691110	0,0,0,0,0	298	149	1	1	1.0,0.994,0.998,1.0,1.0,1.0,1.0,1.0	1.0,1.0,1.0,1.0,1.0	-0.001	SE
703	Choren_v00_mik.OX359202.1G615	NA	chrOX359202.1	-	4495971	4496055	4495875	4495913	4497607	4497700	703	2.2607e+21	0,0,10,0,0,0,0,0	128,45,273,200,84	0,0,3,0,2	233	149	1	1	1.0,1.0,0.978,1.0,1.0,1.0,1.0,1.0	1.0,1.0,0.983,1.0,0.964	0.008	SE
704	Choren_v00_mik.OX359202.1G615	NA	chrOX359202.1	-	4498103	4498156	4497938	4498034	4498320	4498374	704	0,254,13,19,2,170,1,28	0,1,0,0,0,0,0,0	41,8,40,79,0	0,0,0,0,0	202	149	1	1	NA,0.995,1.0,1.0,1.0,1.0,1.0,1.0	1.0,1.0,1.0,1.0,NA	-0.001	SE
705	Choren_v00_mik.OX359200.1G586	NA	chrOX359200.1	+	4289252	4289328	4288793	4288888	4289946	4290020	705	1.23112e+22	0,1,0,1,0,0,0,0	71,27,103,219,44	0,0,2,0,0	225	149	1	1	1.0,0.994,1.0,0.99,1.0,1.0,1.0,1.0	1.0,1.0,0.972,1.0,1.0	0.004	SE
706	Choren_v00_mik.OX359200.1G586	NA	chrOX359200.1	+	4289946	4290020	4288793	4288888	4290092	4290198	706	2,92,529,64,127,96,166,93	0,0,0,0,1,0,0,0	65,9,65,117,32	0,0,0,0,0	223	149	1	1	1.0,1.0,1.0,1.0,0.988,1.0,1.0,1.0	1.0,1.0,1.0,1.0,1.0	-0.002	SE
707	Choren_v00_mik.OX359200.1G586	NA	chrOX359200.1	+	4290261	4290307	4290092	4290198	4291282	4291386	707	3,250,1154,156,267,172,354,91	0,0,3,0,0,0,0,0	105,25,129,224,73	0,0,0,0,0	195	149	1	1	1.0,1.0,0.997,1.0,1.0,1.0,1.0,1.0	1.0,1.0,1.0,1.0,1.0	0	SE
708	Choren_v00_mik.OX359200.1G583	NA	chrOX359200.1	-	4245197	4245465	4244361	4244468	4245640	4245835	708	0,9,12,5,27,27,35,40	0,0,0,0,0,0,0,0	8,20,27,0,0	0,0,4,0,0	298	149	1	1	NA,1.0,1.0,1.0,1.0,1.0,1.0,1.0	1.0,1.0,0.771,NA,NA	0.076	SE
709	Choren_v00_mik.OX359200.1G583	NA	chrOX359200.1	-	4246151	4246261	4245903	4246089	4246748	4247013	709	0,11,2,3,4,28,15,9	2,0,0,0,0,0,0,0	4,7,3,0,0	0,0,0,0,0	259	149	1	1	0.0,1.0,1.0,1.0,1.0,1.0,1.0,1.0	1.0,1.0,1.0,NA,NA	-0.125	SE
710	Choren_v00_mik.OX359200.1G568	NA	chrOX359200.1	-	4130413	4130623	4124712	4124782	4131924	4131997	710	0,0,0,6,0,0,0,0	0,0,0,0,0,0,0,0	2,3,8,0,10	0,4,4,0,3	298	149	1	1	NA,NA,NA,1.0,NA,NA,NA,NA	1.0,0.273,0.5,NA,0.625	0.4	SE
711	Choren_v00_mik.OX359200.1G547	NA	chrOX359200.1	+	3920309	3920422	3919667	3919837	3920532	3920605	711	2.19266e+21	0,0,0,0,0,0,0,0	141,82,261,304,201	0,0,0,4,2	262	149	1	1	1.0,1.0,1.0,1.0,1.0,1.0,1.0,1.0	1.0,1.0,1.0,0.977,0.983	0.008	SE
712	Choren_v00_mik.OX359200.1G541	NA	chrOX359200.1	-	3846182	3846257	3845340	3845403	3847903	3848044	712	3.12147e+21	0,0,6,0,0,0,0,0	186,79,1627,404,1468	0,0,1,0,0	224	149	1	1	1.0,1.0,0.981,1.0,1.0,1.0,1.0,1.0	1.0,1.0,0.999,1.0,1.0	-0.002	SE
713	Choren_v00_mik.OX359200.1G541	NA	chrOX359200.1	-	3847903	3848044	3846182	3846257	3848371	3848413	713	5,63,308,108,126,88,162,107	0,0,0,0,0,0,0,0	131,54,1023,272,942	6,0,3,1,0	290	149	1	1	1.0,1.0,1.0,1.0,1.0,1.0,1.0,1.0	0.918,1.0,0.994,0.993,1.0	0.019	SE
717	Choren_v00_mik.OX359200.1G541	NA	chrOX359200.1	-	3848371	3848413	3846182	3846257	3848563	3848671	717	0,10,40,6,3,12,2,8	0,1,0,1,0,0,0,0	8,5,56,15,82	0,0,2,0,12	191	149	1	1	NA,0.886,1.0,0.824,1.0,1.0,1.0,1.0	1.0,1.0,0.956,1.0,0.842	-0.001	SE
719	Choren_v00_mik.OX359200.1G541	NA	chrOX359200.1	-	3848371	3848413	3848151	3848239	3848563	3848671	719	0,48,213,32,62,23,32,34	0,0,0,0,0,0,0,0	43,15,599,124,587	0,0,4,0,0	191	149	1	1	NA,1.0,1.0,1.0,1.0,1.0,1.0,1.0	1.0,1.0,0.992,1.0,1.0	0.002	SE
720	Choren_v00_mik.OX359200.1G541	NA	chrOX359200.1	-	3848563	3848671	3848371	3848413	3849286	3849350	720	2,59,233,56,62,48,39,39	0,0,0,0,1,0,0,0	64,30,818,194,755	0,0,0,0,0	257	149	1	1	1.0,1.0,1.0,1.0,0.973,1.0,1.0,1.0	1.0,1.0,1.0,1.0,1.0	-0.003	SE
722	Choren_v00_mik.OX359202.1G550	NA	chrOX359202.1	+	4062533	4062726	4062329	4062422	4067229	4067371	722	0,38,176,92,41,39,195,165	0,0,0,0,0,1,0,0	96,57,7,31,16	0,0,0,0,0	298	149	1	1	NA,1.0,1.0,1.0,1.0,0.951,1.0,1.0	1.0,1.0,1.0,1.0,1.0	-0.007	SE
724	Choren_v00_mik.OX359200.1G468	NA	chrOX359200.1	-	2452236	2452300	2452018	2452124	2452481	2452585	724	0,10,0,1,1,0,0,0	0,0,0,0,0,0,0,0	0,6,0,12,0	0,2,0,0,0	213	149	1	1	NA,1.0,NA,1.0,1.0,NA,NA,NA	NA,0.677,NA,1.0,NA	0.161	SE
725	Choren_v00_mik.OX359200.1G457	NA	chrOX359200.1	+	2375317	2375395	2372589	2372735	2377632	2377914	725	0,10,35,2,8,7,5,16	0,0,0,0,0,0,0,0	6,19,105,144,52	0,0,1,0,0	227	149	1	1	NA,1.0,1.0,1.0,1.0,1.0,1.0,1.0	1.0,1.0,0.986,1.0,1.0	0.003	SE
726	Choren_v00_mik.OX359200.1G457	NA	chrOX359200.1	+	2375317	2375395	2372589	2372735	2378119	2378375	726	0,4,13,1,3,3,1,8	0,0,0,0,0,0,0,0	6,5,71,55,35	0,0,9,3,3	227	149	1	1	NA,1.0,1.0,1.0,1.0,1.0,1.0,1.0	1.0,1.0,0.838,0.923,0.884	0.071	SE
727	Choren_v00_mik.OX359200.1G457	NA	chrOX359200.1	+	2377632	2377914	2372589	2372735	2378119	2378375	727	0,4,37,0,9,2,7,14	0,0,0,0,0,0,0,0	6,10,66,60,18	0,0,9,3,3	298	149	1	1	NA,1.0,1.0,NA,1.0,1.0,1.0,1.0	1.0,1.0,0.786,0.909,0.75	0.111	SE
728	Choren_v00_mik.OX359200.1G457	NA	chrOX359200.1	+	2377632	2377914	2375317	2375395	2378119	2378375	728	0,10,57,1,14,6,11,23	0,0,0,0,0,0,0,0	6,23,120,139,46	0,0,21,0,11	298	149	1	1	NA,1.0,1.0,1.0,1.0,1.0,1.0,1.0	1.0,1.0,0.741,1.0,0.676	0.117	SE
729	Choren_v00_mik.OX359200.1G457	NA	chrOX359200.1	+	2380470	2380572	2380270	2380380	2380650	2380702	729	0,6,41,7,11,6,10,23	0,0,0,0,0,0,0,0	7,11,175,180,61	0,0,2,1,0	251	149	1	1	NA,1.0,1.0,1.0,1.0,1.0,1.0,1.0	1.0,1.0,0.981,0.991,1.0	0.006	SE
730	Choren_v00_mik.OX359200.1G457	NA	chrOX359200.1	+	2380650	2380702	2380270	2380380	2381814	2381940	730	0,3,10,11,7,3,7,6	0,0,0,0,0,0,0,0	1,7,46,34,17	0,0,0,0,4	201	149	1	1	NA,1.0,1.0,1.0,1.0,1.0,1.0,1.0	1.0,1.0,1.0,1.0,0.759	0.048	SE
731	Choren_v00_mik.OX359200.1G457	NA	chrOX359200.1	+	2391886	2392089	2383631	2383726	2392165	2392214	731	0,40,109,33,35,21,67,34	0,0,0,0,0,0,0,0	26,27,333,355,264	0,0,0,0,1	298	149	1	1	NA,1.0,1.0,1.0,1.0,1.0,1.0,1.0	1.0,1.0,1.0,1.0,0.992	0.002	SE
732	Choren_v00_mik.OX359200.1G802	NA	chrOX359200.1	-	5833387	5833651	5832616	5832716	5834142	5834280	732	1,0,17,22,6,0,0,12	0,0,1,0,2,0,0,0	11,2,6,2,0	0,0,0,0,1	298	149	1	1	1.0,NA,0.895,1.0,0.6,NA,NA,1.0	1.0,1.0,1.0,1.0,0.0	0.099	SE
733	Choren_v00_mik.OX359200.1G802	NA	chrOX359200.1	-	5834552	5834664	5834142	5834280	5834919	5835044	733	1,0,25,16,40,4,0,10	0,0,1,0,0,0,0,0	11,1,0,11,1	0,0,0,0,0	261	149	1	1	1.0,NA,0.935,1.0,1.0,1.0,NA,1.0	1.0,1.0,NA,1.0,1.0	-0.011	SE
734	Choren_v00_mik.OX359200.1G440	NA	chrOX359200.1	+	2248240	2248531	2248118	2248182	2249785	2250015	734	0,145,917,17,252,91,10,12	0,2,0,0,0,0,0,0	13,6,18,42,2	0,0,0,0,0	298	149	1	1	NA,0.973,1.0,1.0,1.0,1.0,1.0,1.0	1.0,1.0,1.0,1.0,1.0	-0.004	SE
735	Choren_v00_mik.OX359200.1G440	NA	chrOX359200.1	+	2270834	2270991	2270647	2270759	2271088	2271194	735	1,281,1279,44,330,94,66,33	0,1,0,0,2,0,0,0	41,18,64,42,11	0,0,0,0,0	298	149	1	1	1.0,0.993,1.0,1.0,0.988,1.0,1.0,1.0	1.0,1.0,1.0,1.0,1.0	-0.002	SE
736	Choren_v00_mik.OX359200.1G440	NA	chrOX359200.1	+	2270834	2270991	2270647	2270759	2271722	2271789	736	0,130,683,26,139,55,34,14	0,1,0,0,0,0,0,0	19,13,37,21,5	1,0,0,0,0	298	149	1	1	NA,0.985,1.0,1.0,1.0,1.0,1.0,1.0	0.905,1.0,1.0,1.0,1.0	0.017	SE
737	Choren_v00_mik.OX359200.1G440	NA	chrOX359200.1	+	2271088	2271194	2270647	2270759	2271722	2271789	737	0,187,731,31,188,87,42,29	0,1,0,0,0,0,0,0	29,14,38,14,9	1,0,0,0,0	255	149	1	1	NA,0.991,1.0,1.0,1.0,1.0,1.0,1.0	0.944,1.0,1.0,1.0,1.0	0.01	SE
738	Choren_v00_mik.OX359200.1G440	NA	chrOX359200.1	+	2271088	2271194	2270834	2270991	2271722	2271789	738	1,335,1321,49,374,126,74,48	0,0,0,0,0,0,0,0	53,19,65,35,15	2,0,0,0,0	255	149	1	1	1.0,1.0,1.0,1.0,1.0,1.0,1.0,1.0	0.939,1.0,1.0,1.0,1.0	0.012	SE
739	Choren_v00_mik.OX359200.1G440	NA	chrOX359200.1	+	2272012	2272139	2271845	2271949	2272611	2272707	739	0,409,1902,74,586,205,154,46	0,5,7,1,5,2,0,0	50,24,118,62,10	0,0,0,0,0	276	149	1	1	NA,0.978,0.993,0.976,0.984,0.982,1.0,1.0	1.0,1.0,1.0,1.0,1.0	-0.012	SE
740	Choren_v00_mik.OX359200.1G440	NA	chrOX359200.1	+	2272611	2272707	2272012	2272139	2273036	2273088	740	0,263,1134,46,367,82,121,34	0,0,3,0,0,0,0,0	24,11,74,43,10	0,0,2,0,0	245	149	1	1	NA,1.0,0.996,1.0,1.0,1.0,1.0,1.0	1.0,1.0,0.957,1.0,1.0	0.008	SE
741	Choren_v00_mik.OX359200.1G438	NA	chrOX359200.1	+	2235171	2235259	2234438	2234528	2235674	2235786	741	0,17,118,11,44,9,22,11	0,0,0,0,0,2,0,0	19,7,41,69,72	0,0,0,0,0	237	149	1	1	NA,1.0,1.0,1.0,1.0,0.739,1.0,1.0	1.0,1.0,1.0,1.0,1.0	-0.037	SE
742	Choren_v00_mik.OX359200.1G425	NA	chrOX359200.1	-	2110277	2110421	2109206	2109311	2111213	2111312	742	1.17422e+24	0,1,0,0,0,0,0,0	7723368691143660	0,0,0,0,0	293	149	1	1	1.0,0.997,1.0,1.0,1.0,1.0,1.0,1.0	1.0,1.0,1.0,1.0,1.0	0	SE
743	Choren_v00_mik.OX359200.1G425	NA	chrOX359200.1	-	2127199	2127222	2126935	2127087	2128195	2128364	743	0,12,84,13,17,25,22,28	0,109,614,131,132,200,80,121	22,12,85,74,77	91108299480186	172	149	1	1	NA,0.087,0.106,0.079,0.1,0.098,0.192,0.167	0.173,0.088,0.198,0.118,0.264	-0.05	SE
745	Choren_v00_mik.OX359200.1G421	NA	chrOX359200.1	-	2085036	2085105	2084708	2084822	2085550	2085697	745	1.77892e+23	0,0,0,0,0,9,0,10	449133479531409	0,0,0,0,0	218	149	1	1	1.0,1.0,1.0,1.0,1.0,0.982,1.0,0.964	1.0,1.0,1.0,1.0,1.0	-0.007	SE
746	Choren_v00_mik.OX359200.1G421	NA	chrOX359200.1	-	2085935	2085955	2085782	2085860	2086016	2086050	746	0,189,89,184,30,55,175,251	0,0,0,1,0,0,0,0	158,39,145,247,165	0,0,1,2,2	169	149	1	1	NA,1.0,1.0,0.994,1.0,1.0,1.0,1.0	1.0,1.0,0.992,0.991,0.986	0.005	SE
747	Choren_v00_mik.OX359200.1G413	NA	chrOX359200.1	+	2047232	2047331	2045555	2046797	2047763	2047880	747	0,72,217,96,72,27,24,124	0,0,0,2,0,0,0,0	66,45,44,4,6	0,0,0,0,0	248	149	1	1	NA,1.0,1.0,0.966,1.0,1.0,1.0,1.0	1.0,1.0,1.0,1.0,1.0	-0.005	SE
748	Choren_v00_mik.OX359200.1G413	NA	chrOX359200.1	+	2050646	2050750	2050413	2050546	2050820	2050932	748	1,79,190,97,146,18,42,70	0,0,0,0,0,0,0,0	88,27,51,31,18	1,0,0,0,0	253	149	1	1	1.0,1.0,1.0,1.0,1.0,1.0,1.0,1.0	0.981,1.0,1.0,1.0,1.0	0.004	SE
749	Choren_v00_mik.OX359200.1G413	NA	chrOX359200.1	+	2051999	2052156	2050820	2050932	2052780	2052874	749	0,70,215,192,117,23,105,50	0,0,0,0,1,0,0,0	63,38,56,11,26	0,0,0,0,0	298	149	1	1	NA,1.0,1.0,1.0,0.983,1.0,1.0,1.0	1.0,1.0,1.0,1.0,1.0	-0.002	SE
750	Choren_v00_mik.OX359200.1G413	NA	chrOX359200.1	+	2053852	2053919	2052780	2052874	2054486	2054625	750	0,19,34,59,20,0,26,19	0,0,1,0,0,0,2,0	42,5,17,7,9	0,0,0,0,0	216	149	1	1	NA,1.0,0.959,1.0,1.0,NA,0.9,1.0	1.0,1.0,1.0,1.0,1.0	-0.023	SE
751	Choren_v00_mik.OX359200.1G413	NA	chrOX359200.1	+	2054070	2054174	2053852	2053919	2054486	2054625	751	2,41,96,198,69,25,39,94	0,2,0,0,6,0,0,0	127,20,21,29,9	0,0,1,0,0	253	149	1	1	1.0,0.924,1.0,1.0,0.871,1.0,1.0,1.0	1.0,1.0,0.925,1.0,1.0	-0.011	SE
752	Choren_v00_mik.OX359200.1G413	NA	chrOX359200.1	+	2054486	2054625	2054070	2054174	2054724	2054823	752	4,109,282,386,122,99,208,222	0,0,0,2,0,0,0,0	341,52,48,54,28	0,0,0,0,0	288	149	1	1	1.0,1.0,1.0,0.99,1.0,1.0,1.0,1.0	1.0,1.0,1.0,1.0,1.0	-0.001	SE
753	Choren_v00_mik.OX359200.1G399	NA	chrOX359200.1	+	1933466	1933781	1929035	1929087	1935601	1935922	753	0,13,65,23,17,32,7,50	0,0,0,0,0,0,0,0	33,14,6,4,6	0,0,1,0,0	298	149	1	1	NA,1.0,1.0,1.0,1.0,1.0,1.0,1.0	1.0,1.0,0.75,1.0,1.0	0.05	SE
754	Choren_v00_mik.OX359200.1G399	NA	chrOX359200.1	+	1934005	1934299	1933466	1933781	1935601	1935922	754	2,12,410,97,226,112,61,156	0,0,0,0,2,0,0,0	143,20,65,35,47	0,0,0,0,0	298	149	1	1	1.0,1.0,1.0,1.0,0.983,1.0,1.0,1.0	1.0,1.0,1.0,1.0,1.0	-0.002	SE
755	Choren_v00_mik.OX359200.1G398	NA	chrOX359200.1	+	1915919	1917099	1915188	1915272	1917308	1917626	755	0,0,0,0,3,0,3,0	0,2,0,0,1,2,0,0	4,0,2,3,0	1,2,2,0,0	298	149	1	1	NA,0.0,NA,NA,0.6,0.0,1.0,NA	0.667,0.0,0.333,1.0,NA	-0.1	SE
756	Choren_v00_mik.OX359200.1G398	NA	chrOX359200.1	+	1919607	1919892	1918736	1919057	1922405	1922672	756	2,38,10,8,23,20,8,30	0,0,0,0,1,0,0,0	12,17,10,2,11	0,0,0,0,0	298	149	1	1	1.0,1.0,1.0,1.0,0.92,1.0,1.0,1.0	1.0,1.0,1.0,1.0,1.0	-0.01	SE
757	Choren_v00_mik.OX359200.1G388	NA	chrOX359200.1	+	1891155	1891662	1880561	1880701	1892915	1893035	757	5.48812e+22	0,0,1,0,0,0,2,2	3541148907001650	0,0,0,2,10	298	149	1	1	1.0,1.0,0.998,1.0,1.0,1.0,0.991,0.987	1.0,1.0,1.0,0.994,0.988	0.001	SE
758	Choren_v00_mik.OX359200.1G388	NA	chrOX359200.1	+	1892915	1893035	1891155	1891662	1893106	1893195	758	7.39613e+22	0,0,0,2,0,0,0,0	516,63,577,417,1834	0,0,0,0,1	269	149	1	1	1.0,1.0,1.0,0.993,1.0,1.0,1.0,1.0	1.0,1.0,1.0,1.0,0.999	-0.001	SE
759	Choren_v00_mik.OX359200.1G389	NA	chrOX359200.1	-	1842197	1842287	1840827	1840971	1842631	1842752	759	0,66,384,78,49,96,100,29	0,0,0,2,0,0,0,0	24,20,15,103,17	0,0,0,0,0	239	149	1	1	NA,1.0,1.0,0.96,1.0,1.0,1.0,1.0	1.0,1.0,1.0,1.0,1.0	-0.006	SE
760	Choren_v00_mik.OX359200.1G389	NA	chrOX359200.1	-	1842631	1842752	1842197	1842287	1843045	1843218	760	0,130,466,90,82,103,92,29	0,0,0,0,0,0,0,0	24,15,17,95,19	1,0,0,0,2	270	149	1	1	NA,1.0,1.0,1.0,1.0,1.0,1.0,1.0	0.93,1.0,1.0,1.0,0.84	0.046	SE
762	Choren_v00_mik.OX359200.1G368	NA	chrOX359200.1	+	1738236	1738313	1736721	1736767	1739443	1739522	762	1,129,359,74,109,100,45,60	0,0,0,0,0,0,0,0	93,38,97,167,60	0,0,0,2,0	226	149	1	1	1.0,1.0,1.0,1.0,1.0,1.0,1.0,1.0	1.0,1.0,1.0,0.982,1.0	0.004	SE
763	Choren_v00_mik.OX359200.1G368	NA	chrOX359200.1	+	1739443	1739522	1736721	1736767	1740397	1740530	763	0,20,56,17,23,9,10,12	0,0,1,1,0,0,0,0	35,2,16,35,30	0,0,0,0,0	228	149	1	1	NA,1.0,0.973,0.917,1.0,1.0,1.0,1.0	1.0,1.0,1.0,1.0,1.0	-0.016	SE
764	Choren_v00_mik.OX359200.1G368	NA	chrOX359200.1	+	1741045	1741278	1740397	1740530	1742726	1742842	764	1.33267e+21	0,0,0,0,0,3,0,0	195,73,230,353,176	0,0,0,0,0	298	149	1	1	1.0,1.0,1.0,1.0,1.0,0.974,1.0,1.0	1.0,1.0,1.0,1.0,1.0	-0.003	SE
765	Choren_v00_mik.OX359200.1G368	NA	chrOX359200.1	+	1741045	1741278	1740397	1740530	1743416	1743590	765	1,293,460,158,135,74,110,89	0,6,0,0,0,0,0,0	135,64,197,256,157	0,0,0,0,0	298	149	1	1	1.0,0.961,1.0,1.0,1.0,1.0,1.0,1.0	1.0,1.0,1.0,1.0,1.0	-0.005	SE
766	Choren_v00_mik.OX359200.1G368	NA	chrOX359200.1	+	1742726	1742842	1740397	1740530	1743416	1743590	766	0,253,477,140,198,110,123,49	0,6,0,0,0,0,0,0	101,44,158,167,123	0,0,0,0,0	265	149	1	1	NA,0.96,1.0,1.0,1.0,1.0,1.0,1.0	1.0,1.0,1.0,1.0,1.0	-0.006	SE
767	Choren_v00_mik.OX359200.1G368	NA	chrOX359200.1	+	1742726	1742842	1741045	1741278	1743416	1743590	767	0,321,689,241,402,256,240,162	0,29,5,7,0,2,6,0	162,56,200,269,147	3,1,9,3,5	265	149	1	1	NA,0.862,0.987,0.951,1.0,0.986,0.957,1.0	0.968,0.969,0.926,0.981,0.943	0.006	SE
768	Choren_v00_mik.OX359200.1G368	NA	chrOX359200.1	+	1744294	1744351	1743708	1743765	1744858	1745008	768	2.54974e+21	0,0,0,0,0,0,0,0	414,84,286,618,229	0,0,2,0,0	206	149	1	1	1.0,1.0,1.0,1.0,1.0,1.0,1.0,1.0	1.0,1.0,0.99,1.0,1.0	0.002	SE
769	Choren_v00_mik.OX359200.1G367	NA	chrOX359200.1	+	1734084	1734151	1733496	1733582	1735186	1735272	769	0,70,302,55,45,34,31,22	0,0,2,0,0,0,0,0	27,5,21,64,0	0,0,0,0,0	216	149	1	1	NA,1.0,0.99,1.0,1.0,1.0,1.0,1.0	1.0,1.0,1.0,1.0,NA	-0.001	SE
770	Choren_v00_mik.OX359200.1G367	NA	chrOX359200.1	+	1734207	1734259	1734084	1734151	1735186	1735272	770	1.28477e+21	0,0,0,0,4,0,0,0	134,49,83,219,12	1,0,0,0,0	201	149	1	1	1.0,1.0,1.0,1.0,0.972,1.0,1.0,1.0	0.99,1.0,1.0,1.0,1.0	-0.002	SE
771	Choren_v00_mik.OX359200.1G356	NA	chrOX359200.1	-	1665449	1665504	1664759	1665377	1665827	1665982	771	8.50816e+22	0,0,0,0,2,0,0,0	308160886977871	3,0,0,0,0	204	149	1	1	1.0,1.0,1.0,1.0,0.997,1.0,1.0,1.0	0.987,1.0,1.0,1.0,1.0	0.002	SE
772	Choren_v00_mik.OX359200.1G353	NA	chrOX359200.1	-	1639291	1639473	1639018	1639110	1642023	1642159	772	2,22,24,10,10,10,10,9	0,0,0,0,0,0,0,0	13,4,973,102,1322	0,0,1,0,3	298	149	1	1	1.0,1.0,1.0,1.0,1.0,1.0,1.0,1.0	1.0,1.0,0.998,1.0,0.995	0.001	SE
773	Choren_v00_mik.OX359200.1G353	NA	chrOX359200.1	-	1640853	1640977	1639291	1639473	1642023	1642159	773	0,21,18,4,23,28,3,4	0,0,0,0,0,0,0,0	15,7,1553,97,1516	0,0,6,0,6	273	149	1	1	NA,1.0,1.0,1.0,1.0,1.0,1.0,1.0	1.0,1.0,0.993,1.0,0.993	0.003	SE
774	Choren_v00_mik.OX359200.1G353	NA	chrOX359200.1	-	1642023	1642159	1639018	1639110	1642581	1642651	774	0,29,3,0,5,13,4,2	0,0,0,0,0,0,0,0	11,6,627,38,157	0,0,0,0,2	285	149	1	1	NA,1.0,1.0,NA,1.0,1.0,1.0,1.0	1.0,1.0,1.0,1.0,0.976	0.005	SE
775	Choren_v00_mik.OX359200.1G353	NA	chrOX359200.1	-	1642023	1642159	1640853	1640977	1642581	1642651	775	0,40,11,0,21,34,4,4	0,1,0,0,0,0,0,0	18,13,1525,112,852	0,0,0,0,0	285	149	1	1	NA,0.954,1.0,NA,1.0,1.0,1.0,1.0	1.0,1.0,1.0,1.0,1.0	-0.008	SE
777	Choren_v00_mik.OX359200.1G344	NA	chrOX359200.1	+	1598075	1598161	1596940	1596981	1598222	1598275	777	0,122,231,165,69,15,116,23	0,0,3,2,0,0,0,0	50,14,62,72,123	0,0,0,0,0	235	149	1	1	NA,1.0,0.98,0.981,1.0,1.0,1.0,1.0	1.0,1.0,1.0,1.0,1.0	-0.006	SE
778	Choren_v00_mik.OX359200.1G344	NA	chrOX359200.1	+	1603007	1603158	1602879	1602945	1603556	1603616	778	7.5003e+22	0,0,2,0,1,0,0,0	201,93,348,527,314	0,0,0,0,0	298	149	1	1	1.0,1.0,0.999,1.0,0.998,1.0,1.0,1.0	1.0,1.0,1.0,1.0,1.0	0	SE
779	Choren_v00_mik.OX359200.1G344	NA	chrOX359200.1	+	1603556	1603616	1603007	1603158	1603970	1603997	779	2,136,514,116,133,98,125,16	0,0,0,0,0,0,0,0	43,12,73,78,46	0,0,1,2,0	209	149	1	1	1.0,1.0,1.0,1.0,1.0,1.0,1.0,1.0	1.0,1.0,0.981,0.965,1.0	0.011	SE
780	Choren_v00_mik.OX359200.1G439	NA	chrOX359200.1	+	2240487	2240560	2240222	2240292	2241975	2242043	780	1.26473e+21	0,0,2,0,0,0,1,0	206,98,393,478,420	0,0,0,0,0	222	149	1	1	1.0,1.0,0.996,1.0,1.0,1.0,0.996,1.0	1.0,1.0,1.0,1.0,1.0	-0.001	SE
781	Choren_v00_mik.OX359200.1G439	NA	chrOX359200.1	+	2241975	2242043	2240487	2240560	2246919	2246984	781	4.3821e+22	0,2,2,4,1,0,0,4	285144576617594	0,0,0,0,0	217	149	1	1	1.0,0.992,0.997,0.982,0.994,1.0,1.0,0.985	1.0,1.0,1.0,1.0,1.0	-0.006	SE
782	Choren_v00_mik.OX359200.1G336	NA	chrOX359200.1	+	1565043	1565115	1564846	1564979	1569007	1569075	782	0,0,0,33,22,0,0,0	0,0,0,2,0,0,0,0	0,19,27,0,0	0,0,0,0,0	221	149	1	1	NA,NA,NA,0.918,1.0,NA,NA,NA	NA,1.0,1.0,NA,NA	-0.041	SE
783	Choren_v00_mik.OX359200.1G336	NA	chrOX359200.1	+	1565269	1565340	1565043	1565115	1569007	1569075	783	0,0,0,6,7,0,0,0	0,0,0,8,1,0,0,0	0,0,4,0,0	0,3,20,0,0	220	149	1	1	NA,NA,NA,0.337,0.826,NA,NA,NA	NA,0.0,0.119,NA,NA	0.522	SE
785	Choren_v00_mik.OX359202.1G795	NA	chrOX359202.1	+	5664873	5664918	5664771	5664812	5664993	5665086	785	6.26259e+21	0,0,4,0,0,0,0,0	81,31,88,154,21	0,0,0,0,0	194	149	1	1	1.0,1.0,0.991,1.0,1.0,1.0,1.0,1.0	1.0,1.0,1.0,1.0,1.0	-0.001	SE
786	Choren_v00_mik.OX359200.1G338	NA	chrOX359200.1	-	1546580	1546682	1545739	1545807	1546964	1551177	786	4,98,996,147,345,167,209,91	0,0,0,0,0,0,0,1	127,41,262,106,459	0,0,0,0,0	251	149	1	1	1.0,1.0,1.0,1.0,1.0,1.0,1.0,0.982	1.0,1.0,1.0,1.0,1.0	-0.002	SE
789	Choren_v00_mik.OX359200.1G301	NA	chrOX359200.1	+	1384130	1384210	1383608	1383787	1384892	1384970	789	1.14022e+23	0,0,2,0,0,0,0,0	197195583845303	2,0,0,0,0	229	149	1	1	1.0,1.0,0.998,1.0,1.0,1.0,1.0,1.0	0.985,1.0,1.0,1.0,1.0	0.003	SE
790	Choren_v00_mik.OX359200.1G301	NA	chrOX359200.1	+	1385405	1385483	1385071	1385251	1385737	1385899	790	1.82272e+26	0,0,15,0,0,0,0,0	133238427683263	0,0,0,6,0	227	149	1	1	1.0,1.0,0.99,1.0,1.0,1.0,1.0,1.0	1.0,1.0,1.0,0.987,1.0	0.001	SE
791	Choren_v00_mik.OX359202.1G950	NA	chrOX359202.1	+	6484242	6484391	6484117	6484183	6484459	6484532	791	9.4099e+21	0,0,0,2,0,0,2,0	136122471597663	0,0,0,0,3	298	149	1	1	1.0,1.0,1.0,0.98,1.0,1.0,0.991,1.0	1.0,1.0,1.0,1.0,0.991	-0.002	SE
792	Choren_v00_mik.OX359200.1G284	NA	chrOX359200.1	+	1318303	1318483	1317804	1317990	1318799	1318979	792	0,8,8,3,0,1,4,6	0,0,9,5,3,0,0,4	11,0,0,0,0	4,0,5,7,0	298	149	1	1	NA,1.0,0.308,0.231,0.0,1.0,1.0,0.429	0.579,NA,0.0,0.0,NA	0.374	SE
793	Choren_v00_mik.OX359200.1G284	NA	chrOX359200.1	+	1318799	1318979	1317804	1317990	1319295	1319475	793	0,3,26,28,14,5,0,35	0,1,0,0,0,0,0,0	20,15,18,16,13	0,0,0,0,0	298	149	1	1	NA,0.6,1.0,1.0,1.0,1.0,NA,1.0	1.0,1.0,1.0,1.0,1.0	-0.067	SE
794	Choren_v00_mik.OX359200.1G276	NA	chrOX359200.1	-	1237507	1237639	1236984	1237116	1238040	1238169	794	7.50014e+22	0,0,0,2,0,0,0,1	460,43,482,228,490	0,0,0,0,2	281	149	1	1	1.0,1.0,1.0,0.982,1.0,1.0,1.0,0.989	1.0,1.0,1.0,1.0,0.992	-0.002	SE
795	Choren_v00_mik.OX359200.1G276	NA	chrOX359200.1	-	1237732	1237930	1237507	1237639	1238040	1238169	795	3.91768e+27	0,6,22,0,5,2,0,1	1.55035e+18	2,0,2,7,2	298	149	1	1	1.0,0.993,0.991,1.0,0.994,0.996,1.0,0.998	0.997,1.0,0.998,0.99,0.997	0	SE
796	Choren_v00_mik.OX359200.1G273	NA	chrOX359200.1	-	1213587	1213750	1213347	1213441	1213819	1213899	796	0,83,343,67,108,141,212,232	0,0,0,0,2,0,0,0	216,21,70,51,47	0,0,0,0,0	298	149	1	1	NA,1.0,1.0,1.0,0.964,1.0,1.0,1.0	1.0,1.0,1.0,1.0,1.0	-0.005	SE
797	Choren_v00_mik.OX359200.1G273	NA	chrOX359200.1	-	1213819	1213899	1213587	1213750	1214069	1214188	797	0,128,360,88,92,95,142,107	0,0,0,0,0,0,0,1	130,26,60,64,38	0,0,0,0,0	229	149	1	1	NA,1.0,1.0,1.0,1.0,1.0,1.0,0.986	1.0,1.0,1.0,1.0,1.0	-0.002	SE
798	Choren_v00_mik.OX359200.1G246	NA	chrOX359200.1	+	1141109	1141205	1140278	1140557	1141668	1141829	798	1,65,171,71,55,66,94,38	0,0,4,2,2,1,0,0	54,35,125,159,120	2,0,1,1,3	245	149	1	1	1.0,1.0,0.963,0.956,0.944,0.976,1.0,1.0	0.943,1.0,0.987,0.99,0.961	0.004	SE
799	Choren_v00_mik.OX359200.1G245	NA	chrOX359200.1	+	1135543	1135596	1134611	1134774	1135986	1136103	799	1,248,842,164,172,247,293,33	0,0,2,0,0,0,0,0	139,70,185,14,42	0,0,0,0,0	202	149	1	1	1.0,1.0,0.997,1.0,1.0,1.0,1.0,1.0	1.0,1.0,1.0,1.0,1.0	0	SE
800	Choren_v00_mik.OX359200.1G245	NA	chrOX359200.1	+	1137486	1137629	1137030	1137268	1137762	1137935	800	1.34302e+24	0,0,0,0,1,0,0,0	349210360119212	0,0,0,0,0	292	149	1	1	1.0,1.0,1.0,1.0,0.998,1.0,1.0,1.0	1.0,1.0,1.0,1.0,1.0	0	SE
801	Choren_v00_mik.OX359200.1G211	NA	chrOX359200.1	+	1015059	1015151	1014066	1014186	1016336	1016822	801	1.14447e+22	0,2,0,1,0,0,6,0	211,240,94,224,495	0,0,0,0,0	241	149	1	1	1.0,0.993,1.0,0.994,1.0,1.0,0.989,1.0	1.0,1.0,1.0,1.0,1.0	-0.003	SE
802	Choren_v00_mik.OX359200.1G216	NA	chrOX359200.1	-	964623	964646	964292	964412	965219	965397	802	3.15496e+21	0,0,0,0,0,0,0,4	80,44,133,144,84	0,0,0,0,0	172	149	1	1	1.0,1.0,1.0,1.0,1.0,1.0,1.0,0.96	1.0,1.0,1.0,1.0,1.0	-0.005	SE
803	Choren_v00_mik.OX359200.1G216	NA	chrOX359200.1	-	972190	972242	970927	971151	972324	972359	803	0,59,867,34,54,14,17,56	0,0,1,0,0,0,0,0	17,14,69,90,11	0,0,0,0,0	201	149	1	1	NA,1.0,0.998,1.0,1.0,1.0,1.0,1.0	1.0,1.0,1.0,1.0,1.0	0	SE
804	Choren_v00_mik.OX359200.1G216	NA	chrOX359200.1	-	976896	977046	974743	974834	978553	978737	804	0,104,1320,89,304,235,124,111	0,0,2,0,0,0,0,0	124,25,100,180,45	2,0,6,0,0	298	149	1	1	NA,1.0,0.997,1.0,1.0,1.0,1.0,1.0	0.969,1.0,0.893,1.0,1.0	0.027	SE
805	Choren_v00_mik.OX359200.1G206	NA	chrOX359200.1	-	930882	930995	929579	929730	931496	931687	805	0,39,103,48,21,28,40,14	0,0,2,2,0,0,0,0	16,18,97,27,44	0,0,1,0,0	262	149	1	1	NA,1.0,0.967,0.932,1.0,1.0,1.0,1.0	1.0,1.0,0.982,1.0,1.0	-0.011	SE
806	Choren_v00_mik.OX359200.1G202	NA	chrOX359200.1	+	925378	925566	924687	924873	925803	925919	806	12,148,227,97,514,283,204,255	0,0,0,0,0,0,2,0	314,73,478,575,295	0,0,0,1,2	298	149	1	1	1.0,1.0,1.0,1.0,1.0,1.0,0.981,1.0	1.0,1.0,1.0,0.997,0.987	0.001	SE
808	Choren_v00_mik.OX359200.1G196	NA	chrOX359200.1	+	845035	845401	844753	844885	845793	846033	808	0,308,936,100,182,98,160,154	0,9,10,0,8,2,2,0	145,51,157,290,47	2,0,6,3,4	298	149	1	1	NA,0.945,0.979,1.0,0.919,0.961,0.976,1.0	0.973,1.0,0.929,0.98,0.855	0.021	SE
809	Choren_v00_mik.OX359200.1G193	NA	chrOX359200.1	-	824411	824529	823519	823637	824952	825087	809	0,507,1470,238,297,272,446,333	0,1,0,0,0,0,0,0	186,103,280,185,57	0,0,0,0,0	267	149	1	1	NA,0.996,1.0,1.0,1.0,1.0,1.0,1.0	1.0,1.0,1.0,1.0,1.0	-0.001	SE
810	Choren_v00_mik.OX359202.1G89	NA	chrOX359202.1	-	418583	418742	418401	418510	418804	418959	810	4.23381e+21	0,0,0,0,0,0,0,0	384125187377150	0,0,1,0,0	298	149	1	1	1.0,1.0,1.0,1.0,1.0,1.0,1.0,1.0	1.0,1.0,0.989,1.0,1.0	0.002	SE
811	Choren_v00_mik.OX359202.1G89	NA	chrOX359202.1	-	424655	424809	424541	424591	425047	425242	811	1,43,341,48,119,93,35,50	0,0,0,0,0,0,0,0	42,37,100,227,61	0,0,2,0,0	298	149	1	1	1.0,1.0,1.0,1.0,1.0,1.0,1.0,1.0	1.0,1.0,0.962,1.0,1.0	0.008	SE
812	Choren_v00_mik.OX359200.1G885	NA	chrOX359200.1	+	6265901	6265949	6265564	6265838	6266225	6266315	812	1,10,6,7,17,12,51,3	0,0,0,0,2,0,4,0	2,4,45,41,0	0,0,0,0,0	197	149	1	1	1.0,1.0,1.0,1.0,0.865,1.0,0.906,1.0	1.0,1.0,1.0,1.0,NA	-0.029	SE
813	Choren_v00_mik.OX359200.1G885	NA	chrOX359200.1	+	6266843	6266932	6266533	6266690	6266994	6267179	813	0,35,182,32,90,42,57,23	0,0,0,0,0,0,0,0	43,15,33,75,23	1,0,0,4,1	238	149	1	1	NA,1.0,1.0,1.0,1.0,1.0,1.0,1.0	0.964,1.0,1.0,0.921,0.935	0.036	SE
814	Choren_v00_mik.OX359200.1G190	NA	chrOX359200.1	-	811682	811739	811551	811617	811797	811887	814	2,62,199,27,52,32,83,70	0,0,0,0,0,0,6,0	44,36,11,98,4	0,0,0,0,0	206	149	1	1	1.0,1.0,1.0,1.0,1.0,1.0,0.909,1.0	1.0,1.0,1.0,1.0,1.0	-0.011	SE
816	Choren_v00_mik.OX359200.1G178	NA	chrOX359200.1	+	788567	788676	788047	788093	789080	789195	816	1.22973e+21	0,0,0,2,2,2,2,0	139,64,123,117,101	0,0,1,1,0	258	149	1	1	1.0,1.0,1.0,0.986,0.986,0.981,0.984,1.0	1.0,1.0,0.986,0.985,1.0	-0.002	SE
817	Choren_v00_mik.OX359200.1G178	NA	chrOX359200.1	+	788567	788676	788047	788093	790077	790229	817	0,95,249,109,96,70,77,70	0,0,0,3,3,0,0,2	49,43,49,50,46	2,0,3,0,0	258	149	1	1	NA,1.0,1.0,0.955,0.949,1.0,1.0,0.953	0.934,1.0,0.904,1.0,1.0	0.012	SE
818	Choren_v00_mik.OX359200.1G178	NA	chrOX359200.1	+	789080	789195	788047	788093	790077	790229	818	4.15427e+21	0,0,0,3,3,0,0,2	110,41,100,64,51	2,0,3,0,0	264	149	1	1	1.0,1.0,1.0,0.963,0.951,1.0,1.0,0.973	0.969,1.0,0.95,1.0,1.0	0.002	SE
819	Choren_v00_mik.OX359200.1G178	NA	chrOX359200.1	+	789080	789195	788567	788676	790077	790229	819	6.29676e+21	0,4,0,5,2,4,1,2	203,68,176,133,109	2,3,0,0,0	264	149	1	1	1.0,0.977,1.0,0.969,0.987,0.976,0.996,0.985	0.983,0.927,1.0,1.0,1.0	0.004	SE
820	Choren_v00_mik.OX359200.1G184	NA	chrOX359200.1	-	763210	763277	762185	762414	763983	764068	820	0,4,4,206,159,10,18,180	0,0,0,0,0,0,0,0	138,85,0,0,4	1,0,0,0,0	216	149	1	1	NA,1.0,1.0,1.0,1.0,1.0,1.0,1.0	0.99,1.0,NA,NA,1.0	0.003	SE
821	Choren_v00_mik.OX359200.1G184	NA	chrOX359200.1	-	766147	766419	765975	766054	767834	767896	821	0,0,0,64,87,6,39,99	0,0,0,1,5,1,0,2	39,54,0,8,0	0,0,0,0,0	298	149	1	1	NA,NA,NA,0.97,0.897,0.75,1.0,0.961	1.0,1.0,NA,1.0,NA	-0.084	SE
822	Choren_v00_mik.OX359200.1G169	NA	chrOX359200.1	+	714087	714321	711333	711474	718516	718756	822	2.36215e+22	0,4,3,1,1,0,0,0	223,83,329,671,203	0,2,0,0,0	298	149	1	1	1.0,0.978,0.996,0.991,0.994,1.0,1.0,1.0	1.0,0.954,1.0,1.0,1.0	0.004	SE
823	Choren_v00_mik.OX359200.1G168	NA	chrOX359200.1	+	697562	697784	696126	696288	697989	698102	823	7,69,330,57,133,48,105,36	0,0,0,0,0,0,0,0	51,33,298,201,340	0,0,0,2,2	298	149	1	1	1.0,1.0,1.0,1.0,1.0,1.0,1.0,1.0	1.0,1.0,1.0,0.98,0.988	0.006	SE
824	Choren_v00_mik.OX359200.1G165	NA	chrOX359200.1	-	671443	671550	670827	670926	671690	671801	824	0,112,219,223,152,111,314,289	0,2,0,0,1,0,0,4	77,51,72,18,17	0,1,0,0,0	256	149	1	1	NA,0.97,1.0,1.0,0.989,1.0,1.0,0.977	1.0,0.967,1.0,1.0,1.0	-0.003	SE
825	Choren_v00_mik.OX359200.1G163	NA	chrOX359200.1	-	665391	665421	664999	665171	665495	665540	825	1.4399e+22	0,0,0,1,0,0,0,2	84,93,463,391,428	1,0,5,3,1	179	149	1	1	1.0,1.0,1.0,0.996,1.0,1.0,1.0,0.991	0.986,1.0,0.987,0.991,0.997	0.006	SE
826	Choren_v00_mik.OX359200.1G163	NA	chrOX359200.1	-	665495	665540	664999	665171	665658	665708	826	1,152,293,90,101,86,142,93	0,0,0,0,4,2,0,0	24,16,144,89,158	0,0,2,0,0	194	149	1	1	1.0,1.0,1.0,1.0,0.951,0.971,1.0,1.0	1.0,1.0,0.982,1.0,1.0	-0.006	SE
827	Choren_v00_mik.OX359200.1G163	NA	chrOX359200.1	-	665495	665540	664999	665171	665820	665897	827	0,0,1,0,0,0,0,0	0,0,0,0,0,0,0,0	0,0,10,3,3	0,0,0,8,0	194	149	1	1	NA,NA,1.0,NA,NA,NA,NA,NA	NA,NA,1.0,0.224,1.0	0.259	SE
830	Choren_v00_mik.OX359200.1G156	NA	chrOX359200.1	+	654898	655122	654461	654788	655630	655906	830	1,15,6,40,5,29,26,23	0,4,0,0,0,0,0,1	12,0,20,26,14	0,0,0,0,0	298	149	1	1	1.0,0.652,1.0,1.0,1.0,1.0,1.0,0.92	1.0,NA,1.0,1.0,1.0	-0.053	SE
831	Choren_v00_mik.OX359200.1G144	NA	chrOX359200.1	+	581898	581987	581641	581671	582382	582632	831	23,1513,3013,0,1614,1640,2006,0	0,0,0,0,4,0,0,0	761,1079,98,702,266	0,0,0,0,0	238	149	1	1	1.0,1.0,1.0,NA,0.996,1.0,1.0,NA	1.0,1.0,1.0,1.0,1.0	-0.001	SE
832	Choren_v00_mik.OX359200.1G136	NA	chrOX359200.1	+	541869	541940	540200	540311	542188	542238	832	2.29306e+28	0,0,3,0,0,0,0,0	1.26373e+16	0,0,0,0,0	220	149	1	1	1.0,1.0,0.999,1.0,1.0,1.0,1.0,1.0	1.0,1.0,1.0,1.0,1.0	0	SE
833	Choren_v00_mik.OX359200.1G136	NA	chrOX359200.1	+	541869	541940	540200	540311	542392	542456	833	5.21722e+22	0,0,0,0,0,0,0,0	421287466382113	0,0,2,0,0	220	149	1	1	1.0,1.0,1.0,1.0,1.0,1.0,1.0,1.0	1.0,1.0,0.994,1.0,1.0	0.001	SE
834	Choren_v00_mik.OX359200.1G136	NA	chrOX359200.1	+	542188	542238	540200	540311	542392	542456	834	3.41617e+22	0,0,0,0,0,0,0,0	377147380242114	0,0,2,0,0	199	149	1	1	1.0,1.0,1.0,1.0,1.0,1.0,1.0,1.0	1.0,1.0,0.993,1.0,1.0	0.001	SE
835	Choren_v00_mik.OX359200.1G136	NA	chrOX359200.1	+	542188	542238	541869	541940	542392	542456	835	2.11134e+29	0,0,5,0,0,0,4,0	1.21259e+16	0,0,0,0,0	199	149	1	1	1.0,1.0,0.999,1.0,1.0,1.0,0.998,1.0	1.0,1.0,1.0,1.0,1.0	0	SE
836	Choren_v00_mik.OX359200.1G138	NA	chrOX359200.1	-	533892	533945	532571	533389	535533	535630	836	6.32215e+22	0,0,2,0,0,0,0,0	130,52,165,126,88	0,0,0,0,0	202	149	1	1	1.0,1.0,0.998,1.0,1.0,1.0,1.0,1.0	1.0,1.0,1.0,1.0,1.0	0	SE
837	Choren_v00_mik.OX359200.1G133	NA	chrOX359200.1	-	503395	503487	502584	502662	503547	503579	837	2,147,563,133,122,117,124,92	0,0,0,2,0,0,0,0	93,58,245,277,133	0,0,0,0,0	241	149	1	1	1.0,1.0,1.0,0.976,1.0,1.0,1.0,1.0	1.0,1.0,1.0,1.0,1.0	-0.003	SE
838	Choren_v00_mik.OX359200.1G132	NA	chrOX359200.1	-	496457	496586	495733	495972	497231	497310	838	2,136,908,126,310,163,99,70	0,0,2,0,0,0,0,0	77,15,301,329,298	0,0,0,0,0	278	149	1	1	1.0,1.0,0.996,1.0,1.0,1.0,1.0,1.0	1.0,1.0,1.0,1.0,1.0	0	SE
839	Choren_v00_mik.OX359200.1G106	NA	chrOX359200.1	-	357938	358089	357729	357832	358159	358189	839	0,97,135,93,22,79,54,58	0,0,0,0,0,0,0,0	39,42,33,52,20	0,2,0,0,0	298	149	1	1	NA,1.0,1.0,1.0,1.0,1.0,1.0,1.0	1.0,0.913,1.0,1.0,1.0	0.017	SE
840	Choren_v00_mik.OX359200.1G102	NA	chrOX359200.1	-	348483	348745	348101	348217	349054	349382	840	7,543,2877,257,291,239,93,174	0,0,0,0,0,0,0,1	286,99,290,887,111	0,0,0,1,0	298	149	1	1	1.0,1.0,1.0,1.0,1.0,1.0,1.0,0.989	1.0,1.0,1.0,0.998,1.0	-0.001	SE
841	Choren_v00_mik.OX359200.1G605	NA	chrOX359200.1	+	4422729	4422778	4422518	4422604	4423223	4423297	841	0,4,105,7,13,10,16,2	0,0,0,0,0,0,0,2	10,7,19,22,23	0,0,0,0,2	198	149	1	1	NA,1.0,1.0,1.0,1.0,1.0,1.0,0.429	1.0,1.0,1.0,1.0,0.896	-0.061	SE
842	Choren_v00_mik.OX359200.1G605	NA	chrOX359200.1	+	4423415	4423494	4423223	4423297	4423878	4423925	842	0,17,249,9,12,31,25,12	0,0,2,0,0,0,0,0	25,11,31,31,52	0,0,6,0,1	228	149	1	1	NA,1.0,0.988,1.0,1.0,1.0,1.0,1.0	1.0,1.0,0.772,1.0,0.971	0.05	SE
843	Choren_v00_mik.OX359200.1G101	NA	chrOX359200.1	-	343913	344026	343754	343845	344192	344210	843	9.44012e+22	0,0,0,0,0,0,0,0	450,86,229,440,148	2,0,0,0,0	262	149	1	1	1.0,1.0,1.0,1.0,1.0,1.0,1.0,1.0	0.992,1.0,1.0,1.0,1.0	0.002	SE
844	Choren_v00_mik.OX359200.1G101	NA	chrOX359200.1	-	344103	344121	343913	344026	344192	344210	844	1.52971e+23	0,0,0,0,0,0,1,0	412,89,317,413,174	0,0,0,0,0	167	149	1	1	1.0,1.0,1.0,1.0,1.0,1.0,0.999,1.0	1.0,1.0,1.0,1.0,1.0	0	SE
845	Choren_v00_mik.OX359200.1G96	NA	chrOX359200.1	+	339739	339888	339589	339667	340143	340216	845	0,33,227,52,45,30,83,70	0,0,0,0,0,0,0,2	56,21,580,315,487	0,0,0,2,0	298	149	1	1	NA,1.0,1.0,1.0,1.0,1.0,1.0,0.946	1.0,1.0,1.0,0.987,1.0	-0.005	SE
846	Choren_v00_mik.OX359200.1G96	NA	chrOX359200.1	+	341403	341425	341287	341342	341508	341594	846	2,8,92,24,17,18,46,38	0,0,0,0,0,0,0,0	28,15,295,145,319	0,0,1,0,0	171	149	1	1	1.0,1.0,1.0,1.0,1.0,1.0,1.0,1.0	1.0,1.0,0.996,1.0,1.0	0.001	SE
847	Choren_v00_mik.OX359202.1G5	NA	chrOX359202.1	+	42721	42866	42534	42652	45058	45312	847	0,80,399,66,89,86,104,57	0,0,0,0,0,0,0,0	71,39,106,113,44	0,0,0,1,0	294	149	1	1	NA,1.0,1.0,1.0,1.0,1.0,1.0,1.0	1.0,1.0,1.0,0.983,1.0	0.003	SE
848	Choren_v00_mik.OX359202.1G5	NA	chrOX359202.1	+	45058	45312	42721	42866	45736	45859	848	0,46,182,52,45,41,47,34	0,0,1,0,0,0,0,0	48,24,49,48,24	0,0,0,0,0	298	149	1	1	NA,1.0,0.989,1.0,1.0,1.0,1.0,1.0	1.0,1.0,1.0,1.0,1.0	-0.002	SE
849	Choren_v00_mik.OX359202.1G5	NA	chrOX359202.1	+	45385	45462	45058	45312	45736	45859	849	0,63,315,61,76,57,92,54	0,0,0,0,2,0,0,0	70,22,69,95,48	0,0,0,0,1	226	149	1	1	NA,1.0,1.0,1.0,0.962,1.0,1.0,1.0	1.0,1.0,1.0,1.0,0.969	0.001	SE
850	Choren_v00_mik.OX359200.1G95	NA	chrOX359200.1	+	332809	332872	332536	332747	333179	333416	850	4,134,881,87,290,7,205,147	0,0,3,0,0,0,0,1	110,64,355,332,1042	0,0,0,0,0	212	149	1	1	1.0,1.0,0.995,1.0,1.0,1.0,1.0,0.99	1.0,1.0,1.0,1.0,1.0	-0.002	SE
851	Choren_v00_mik.OX359200.1G94	NA	chrOX359200.1	-	325484	325560	325151	325425	325858	325939	851	0,6,29,14,5,30,54,33	0,0,0,0,0,0,0,0	36,6,9,1,2	0,0,0,0,1	225	149	1	1	NA,1.0,1.0,1.0,1.0,1.0,1.0,1.0	1.0,1.0,1.0,1.0,0.57	0.086	SE
852	Choren_v00_mik.OX359200.1G94	NA	chrOX359200.1	-	325620	325701	325484	325560	325858	325939	852	2,218,755,100,108,145,171,88	0,3,3,0,0,2,0,0	76,29,72,96,18	2,0,1,0,0	230	149	1	1	1.0,0.979,0.994,1.0,1.0,0.979,1.0,1.0	0.961,1.0,0.979,1.0,1.0	0.006	SE
853	Choren_v00_mik.OX359200.1G359	NA	chrOX359200.1	-	1686312	1686372	1685969	1686030	1686499	1686578	853	0,32,170,19,17,27,9,14	0,0,0,0,0,2,0,0	4,4,44,84,20	0,0,0,0,0	209	149	1	1	NA,1.0,1.0,1.0,1.0,0.906,1.0,1.0	1.0,1.0,1.0,1.0,1.0	-0.013	SE
854	Choren_v00_mik.OX359200.1G93	NA	chrOX359200.1	-	321644	321708	321272	321404	321902	321988	854	4.51593e+22	0,0,2,0,0,0,0,0	5.71378e+17	0,0,0,0,0	213	149	1	1	1.0,1.0,0.997,1.0,1.0,1.0,1.0,1.0	1.0,1.0,1.0,1.0,1.0	0	SE
855	Choren_v00_mik.OX359200.1G92	NA	chrOX359200.1	-	319675	319843	319548	319609	320098	320198	855	8,51,392,105,136,81,81,78	0,0,8,0,0,0,0,0	61,65,175,186,4	0,0,0,1,0	298	149	1	1	1.0,1.0,0.961,1.0,1.0,1.0,1.0,1.0	1.0,1.0,1.0,0.989,1.0	-0.003	SE
856	Choren_v00_mik.OX359200.1G92	NA	chrOX359200.1	-	319675	319843	319548	319609	320402	320522	856	6,18,261,78,107,79,65,76	0,0,4,0,0,0,0,0	57,60,142,141,4	0,0,0,0,0	298	149	1	1	1.0,1.0,0.97,1.0,1.0,1.0,1.0,1.0	1.0,1.0,1.0,1.0,1.0	-0.004	SE
857	Choren_v00_mik.OX359200.1G92	NA	chrOX359200.1	-	320098	320198	319548	319609	320402	320522	857	0,30,53,12,26,28,7,20	0,0,4,0,0,0,0,0	24,17,13,56,8	0,0,0,0,0	249	149	1	1	NA,1.0,0.888,1.0,1.0,1.0,1.0,1.0	1.0,1.0,1.0,1.0,1.0	-0.016	SE
860	Choren_v00_mik.OX359200.1G70	NA	chrOX359200.1	-	244173	244720	242390	243867	246495	246701	860	2,106,378,192,87,206,126,61	0,0,0,0,0,0,0,0	104,24,121,125,131	0,0,0,1,0	298	149	1	1	1.0,1.0,1.0,1.0,1.0,1.0,1.0,1.0	1.0,1.0,1.0,0.984,1.0	0.003	SE
861	Choren_v00_mik.OX359200.1G65	NA	chrOX359200.1	-	233063	233239	232510	232758	233640	233744	861	4.45813e+22	0,0,0,0,0,1,0,0	2.22166e+16	0,0,0,0,0	298	149	1	1	1.0,1.0,1.0,1.0,1.0,0.995,1.0,1.0	1.0,1.0,1.0,1.0,1.0	-0.001	SE
862	Choren_v00_mik.OX359200.1G64	NA	chrOX359200.1	-	226685	226764	226525	226630	226823	227268	862	2,105,217,102,106,141,122,60	0,0,0,0,0,2,0,0	79,65,45,161,33	0,0,2,0,0	228	149	1	1	1.0,1.0,1.0,1.0,1.0,0.979,1.0,1.0	1.0,1.0,0.936,1.0,1.0	0.01	SE
863	Choren_v00_mik.OX359200.1G59	NA	chrOX359200.1	+	209499	209637	208832	209143	209700	209799	863	1.26128e+21	0,0,2,0,0,0,0,0	178,85,679,554,1067	0,0,0,0,0	287	149	1	1	1.0,1.0,0.986,1.0,1.0,1.0,1.0,1.0	1.0,1.0,1.0,1.0,1.0	-0.002	SE
864	Choren_v00_mik.OX359200.1G59	NA	chrOX359200.1	+	211989	212079	211751	211868	212317	212409	864	1.13121e+23	0,0,0,0,0,0,0,0	299,92,1156,563,1317	0,0,0,0,1	239	149	1	1	1.0,1.0,1.0,1.0,1.0,1.0,1.0,1.0	1.0,1.0,1.0,1.0,0.999	0	SE
865	Choren_v00_mik.OX359200.1G54	NA	chrOX359200.1	+	199702	199837	198424	198525	200633	200679	865	1.51889e+28	0,0,0,0,0,0,0,0	902259913888248	0,0,1,0,0	284	149	1	1	1.0,1.0,1.0,1.0,1.0,1.0,1.0,1.0	1.0,1.0,0.998,1.0,1.0	0	SE
866	Choren_v00_mik.OX359202.1G591	NA	chrOX359202.1	+	4382408	4382557	4382160	4382298	4382639	4382837	866	0,43,35,41,53,45,127,16	0,0,0,0,0,0,2,0	40,29,26,185,21	2,0,0,2,0	298	149	1	1	NA,1.0,1.0,1.0,1.0,1.0,0.969,1.0	0.909,1.0,1.0,0.979,1.0	0.018	SE
867	Choren_v00_mik.OX359200.1G41	NA	chrOX359200.1	+	157748	157808	157525	157689	159678	159749	867	0,77,224,54,27,73,29,35	0,0,1,0,0,4,0,2	15,17,165,48,105	1,0,13,0,9	209	149	1	1	NA,1.0,0.994,1.0,1.0,0.929,1.0,0.926	0.914,1.0,0.9,1.0,0.893	0.037	SE
869	Choren_v00_mik.OX359200.1G36	NA	chrOX359200.1	+	140998	141092	140822	140938	141151	141306	869	0,271,1104,215,300,273,164,121	0,0,0,0,0,0,0,0	2181069151413740	0,0,0,0,1	243	149	1	1	NA,1.0,1.0,1.0,1.0,1.0,1.0,1.0	1.0,1.0,1.0,1.0,0.998	0	SE
870	Choren_v00_mik.OX359200.1G35	NA	chrOX359200.1	+	135345	135661	135231	135291	135740	135978	870	1.25082e+23	0,0,1,0,0,0,0,0	403109625519499	0,0,0,0,0	298	149	1	1	1.0,1.0,0.999,1.0,1.0,1.0,1.0,1.0	1.0,1.0,1.0,1.0,1.0	0	SE
871	Choren_v00_mik.OX359200.1G34	NA	chrOX359200.1	+	133864	133942	133580	133794	134004	134158	871	2.32617e+22	0,0,0,0,0,0,0,0	233,94,546,551,537	0,0,0,1,0	227	149	1	1	1.0,1.0,1.0,1.0,1.0,1.0,1.0,1.0	1.0,1.0,1.0,0.997,1.0	0.001	SE
872	Choren_v00_mik.OX359200.1G34	NA	chrOX359200.1	+	134004	134158	133580	133794	134241	134304	872	3.21711e+22	0,0,0,0,0,0,0,0	227,60,341,437,171	0,0,0,0,1	298	149	1	1	1.0,1.0,1.0,1.0,1.0,1.0,1.0,1.0	1.0,1.0,1.0,1.0,0.988	0.002	SE
873	Choren_v00_mik.OX359200.1G33	NA	chrOX359200.1	+	126691	126752	125708	126227	126815	126960	873	4,115,652,105,84,121,105,113	0,0,1,0,0,0,0,0	92,70,554,469,394	0,0,0,0,4	210	149	1	1	1.0,1.0,0.998,1.0,1.0,1.0,1.0,1.0	1.0,1.0,1.0,1.0,0.986	0.003	SE
874	Choren_v00_mik.OX359200.1G31	NA	chrOX359200.1	+	120528	120638	120326	120445	120696	120763	874	0,141,436,57,59,111,97,103	0,0,0,1,0,0,0,0	46,50,29,113,27	0,0,0,0,0	259	149	1	1	NA,1.0,1.0,0.97,1.0,1.0,1.0,1.0	1.0,1.0,1.0,1.0,1.0	-0.004	SE
875	Choren_v00_mik.OX359200.1G11	NA	chrOX359200.1	+	65105	65217	64936	65047	65271	65367	875	2.16052e+21	0,0,1,0,0,0,0,0	197,51,175,303,106	0,0,2,0,0	261	149	1	1	1.0,1.0,0.997,1.0,1.0,1.0,1.0,1.0	1.0,1.0,0.98,1.0,1.0	0.004	SE
876	Choren_v00_mik.OX359200.1G5	NA	chrOX359200.1	+	31024	31138	30801	30966	31201	31333	876	1,151,595,52,124,153,203,102	0,0,0,0,0,2,0,0	103,47,116,281,86	0,0,0,0,0	263	149	1	1	1.0,1.0,1.0,1.0,1.0,0.977,1.0,1.0	1.0,1.0,1.0,1.0,1.0	-0.003	SE
878	Choren_v00_mik.OX359200.1G5	NA	chrOX359200.1	+	31402	31486	31201	31333	31540	31622	878	1,210,595,98,183,141,248,156	0,0,2,0,0,0,0,0	92,68,120,304,63	0,0,0,0,0	233	149	1	1	1.0,1.0,0.995,1.0,1.0,1.0,1.0,1.0	1.0,1.0,1.0,1.0,1.0	-0.001	SE
879	Choren_v00_mik.OX359200.1G5	NA	chrOX359200.1	+	31540	31622	30801	30966	31738	31817	879	0,108,363,65,114,129,240,83	0,0,0,0,0,0,0,0	61,39,78,144,39	0,2,0,0,0	231	149	1	1	NA,1.0,1.0,1.0,1.0,1.0,1.0,1.0	1.0,0.926,1.0,1.0,1.0	0.015	SE
880	Choren_v00_mik.OX359200.1G20	NA	chrOX359200.1	-	29172	29215	28954	29114	29267	29630	880	1.05512e+23	0,0,0,0,0,0,0,0	550,189,129,574,77	0,0,0,0,3	192	149	1	1	1.0,1.0,1.0,1.0,1.0,1.0,1.0,1.0	1.0,1.0,1.0,1.0,0.952	0.01	SE
881	Choren_v00_mik.OX359200.1G20	NA	chrOX359200.1	-	29684	29768	29267	29630	29832	29952	881	6.56415e+22	0,0,0,0,0,0,2,0	375,207,186,586,41	0,0,0,0,0	233	149	1	1	1.0,1.0,1.0,1.0,1.0,1.0,0.993,1.0	1.0,1.0,1.0,1.0,1.0	-0.001	SE
882	Choren_v00_mik.OX359200.1G17	NA	chrOX359200.1	-	22370	22426	21852	22015	22491	22658	882	0,18,82,19,36,7,8,26	0,0,0,0,0,0,0,0	19,5,456,246,481	0,0,1,1,2	205	149	1	1	NA,1.0,1.0,1.0,1.0,1.0,1.0,1.0	1.0,1.0,0.997,0.994,0.994	0.003	SE
883	Choren_v00_mik.OX359199.1G1196	NA	chrOX359199.1	-	7611088	7611191	7610853	7611032	7611255	7611603	883	2,49,815,156,179,138,85,133	0,0,2,0,0,0,0,0	114,32,166,503,193	0,0,0,0,0	252	149	1	1	1.0,1.0,0.996,1.0,1.0,1.0,1.0,1.0	1.0,1.0,1.0,1.0,1.0	0	SE
884	Choren_v00_mik.OX359199.1G1183	NA	chrOX359199.1	+	7601825	7601922	7601695	7601762	7601975	7602065	884	2.29972e+21	0,0,10,0,0,0,0,0	138,112,101,193,55	0,0,0,1,0	246	149	1	1	1.0,1.0,0.978,1.0,1.0,1.0,1.0,1.0	1.0,1.0,1.0,0.992,1.0	-0.001	SE
887	Choren_v00_mik.OX359199.1G1181	NA	chrOX359199.1	+	7593675	7593908	7593132	7593203	7593966	7594061	887	0,54,163,32,77,45,110,55	0,5,11,2,0,0,0,0	78,27,127,207,89	0,0,9,2,3	298	149	1	1	NA,0.844,0.881,0.889,1.0,1.0,1.0,1.0	1.0,1.0,0.876,0.981,0.937	-0.014	SE
888	Choren_v00_mik.OX359199.1G1181	NA	chrOX359199.1	+	7593851	7593908	7593132	7593203	7593966	7594061	888	0,36,79,22,49,17,70,24	0,5,11,2,0,0,0,0	29,17,65,108,35	0,0,9,2,3	206	149	1	1	NA,0.839,0.839,0.888,1.0,1.0,1.0,1.0	1.0,1.0,0.839,0.975,0.894	-0.004	SE
889	Choren_v00_mik.OX359199.1G1192	NA	chrOX359199.1	-	7582100	7582186	7581581	7581710	7583421	7583477	889	2.33392e+21	0,2,0,0,5,2,1,0	175106540555735	0,0,2,0,4	235	149	1	1	1.0,0.991,1.0,1.0,0.973,0.985,0.996,1.0	1.0,1.0,0.994,1.0,0.991	-0.004	SE
890	Choren_v00_mik.OX359199.1G1192	NA	chrOX359199.1	-	7583421	7583477	7582100	7582186	7586096	7586212	890	1.3288e+21	0,0,0,0,0,0,0,0	158,84,463,551,646	0,0,0,0,3	205	149	1	1	1.0,1.0,1.0,1.0,1.0,1.0,1.0,1.0	1.0,1.0,1.0,1.0,0.994	0.001	SE
891	Choren_v00_mik.OX359199.1G1191	NA	chrOX359199.1	-	7577201	7577411	7576625	7576790	7577510	7577654	891	7.49824e+22	0,0,4,2,0,0,0,0	785125300612144	0,0,0,0,0	298	149	1	1	1.0,1.0,0.997,0.995,1.0,1.0,1.0,1.0	1.0,1.0,1.0,1.0,1.0	-0.001	SE
892	Choren_v00_mik.OX359199.1G1191	NA	chrOX359199.1	-	7577510	7577654	7577201	7577411	7577732	7577857	892	1.35183e+23	0,1,15,2,2,0,0,1	718150467579190	2,0,0,0,0	293	149	1	1	1.0,0.996,0.989,0.994,0.994,1.0,1.0,0.997	0.995,1.0,1.0,1.0,1.0	-0.003	SE
895	Choren_v00_mik.OX359199.1G1188	NA	chrOX359199.1	-	7555795	7555891	7555558	7555714	7555970	7556033	895	0,245,825,119,240,127,161,184	0,0,0,3,0,0,0,0	119,86,558,421,384	0,0,0,0,0	245	149	1	1	NA,1.0,1.0,0.96,1.0,1.0,1.0,1.0	1.0,1.0,1.0,1.0,1.0	-0.006	SE
896	Choren_v00_mik.OX359199.1G1159	NA	chrOX359199.1	+	7500538	7500676	7500392	7500473	7500735	7500905	896	0,97,384,103,213,90,143,110	0,0,0,0,0,0,0,2	59,25,102,29,10	1,0,0,0,0	287	149	1	1	NA,1.0,1.0,1.0,1.0,1.0,1.0,0.966	0.968,1.0,1.0,1.0,1.0	0.002	SE
897	Choren_v00_mik.OX359199.1G1152	NA	chrOX359199.1	+	7476941	7477063	7476692	7476880	7477118	7477553	897	0,27,103,31,12,35,47,31	0,0,0,1,0,0,0,0	10,2,14,14,14	0,0,0,0,0	271	149	1	1	NA,1.0,1.0,0.945,1.0,1.0,1.0,1.0	1.0,1.0,1.0,1.0,1.0	-0.008	SE
898	Choren_v00_mik.OX359201.1G855	NA	chrOX359201.1	+	6184722	6185650	6184032	6184220	6185975	6188349	898	0,15,154,13,28,7,4,18	0,0,1,0,0,0,0,0	1,10,14,19,9	0,0,0,0,0	298	149	1	1	NA,1.0,0.987,1.0,1.0,1.0,1.0,1.0	1.0,1.0,1.0,1.0,1.0	-0.002	SE
899	Choren_v00_mik.OX359199.1G1149	NA	chrOX359199.1	-	7464184	7466137	7463726	7463938	7466441	7466618	899	0,12,66,24,11,16,15,13	0,102,129,76,37,85,70,98	12,7,57,27,51	113,63,126,172,215	298	149	1	1	NA,0.056,0.204,0.136,0.129,0.086,0.097,0.062	0.05,0.053,0.184,0.073,0.106	0.017	SE
900	Choren_v00_mik.OX359199.1G1133	NA	chrOX359199.1	+	7429985	7430045	7429147	7429510	7430213	7430384	900	0,86,247,78,101,72,89,148	0,0,0,0,0,0,0,4	65,35,85,131,26	0,0,0,0,0	209	149	1	1	NA,1.0,1.0,1.0,1.0,1.0,1.0,0.963	1.0,1.0,1.0,1.0,1.0	-0.005	SE
901	Choren_v00_mik.OX359199.1G1130	NA	chrOX359199.1	-	7397704	7397775	7397480	7397640	7397913	7398261	901	0,13,96,36,4,7,6,25	0,0,0,0,0,0,0,4	47,12,29,10,2	0,0,0,0,0	220	149	1	1	NA,1.0,1.0,1.0,1.0,1.0,1.0,0.809	1.0,1.0,1.0,1.0,1.0	-0.027	SE
902	Choren_v00_mik.OX359199.1G1116	NA	chrOX359199.1	+	7338993	7339328	7338713	7338817	7340938	7341212	902	0,83,152,32,64,72,67,8	0,0,0,0,0,0,0,0	32,23,186,176,146	0,0,5,0,0	298	149	1	1	NA,1.0,1.0,1.0,1.0,1.0,1.0,1.0	1.0,1.0,0.949,1.0,1.0	0.01	SE
903	Choren_v00_mik.OX359199.1G1116	NA	chrOX359199.1	+	7339740	7339816	7338993	7339328	7340938	7341212	903	0,2,13,4,117,7,173,0	0,0,1,0,0,0,0,0	0,58,310,242,151	2,0,0,0,2	225	149	1	1	NA,1.0,0.896,1.0,1.0,1.0,1.0,NA	0.0,1.0,1.0,1.0,0.98	0.187	SE
904	Choren_v00_mik.OX359199.1G1111	NA	chrOX359199.1	+	7331383	7331488	7329624	7329877	7334396	7334472	904	0,52,225,87,70,45,49,26	0,0,0,0,0,0,0,0	45,19,911,467,773	0,0,2,0,0	254	149	1	1	NA,1.0,1.0,1.0,1.0,1.0,1.0,1.0	1.0,1.0,0.996,1.0,1.0	0.001	SE
905	Choren_v00_mik.OX359199.1G1111	NA	chrOX359199.1	+	7334396	7334472	7331383	7331488	7334823	7334869	905	0,29,160,59,47,40,18,1	0,3,5,2,1,0,0,0	28,11,619,263,458	0,0,29,2,33	225	149	1	1	NA,0.865,0.955,0.951,0.969,1.0,1.0,1.0	1.0,1.0,0.934,0.989,0.902	-0.002	SE
906	Choren_v00_mik.OX359199.1G1103	NA	chrOX359199.1	-	7279738	7279864	7279573	7279653	7279934	7279985	906	1,149,331,88,146,109,88,68	0,0,3,0,0,0,0,0	83,27,78,248,168	0,0,0,0,0	275	149	1	1	1.0,1.0,0.984,1.0,1.0,1.0,1.0,1.0	1.0,1.0,1.0,1.0,1.0	-0.002	SE
907	Choren_v00_mik.OX359199.1G1094	NA	chrOX359199.1	+	7253684	7253760	7253480	7253576	7254701	7254762	907	3,140,299,79,100,97,122,36	0,0,0,0,0,0,0,0	44,31,371,239,475	0,0,0,0,2	225	149	1	1	1.0,1.0,1.0,1.0,1.0,1.0,1.0,1.0	1.0,1.0,1.0,1.0,0.994	0.001	SE
908	Choren_v00_mik.OX359199.1G1094	NA	chrOX359199.1	+	7254014	7254100	7253684	7253760	7254701	7254762	908	9.37273e+21	0,0,0,0,0,0,0,0	204,95,958,606,1378	0,0,1,0,0	235	149	1	1	1.0,1.0,1.0,1.0,1.0,1.0,1.0,1.0	1.0,1.0,0.998,1.0,1.0	0	SE
909	Choren_v00_mik.OX359199.1G1094	NA	chrOX359199.1	+	7254701	7254762	7253684	7253760	7254846	7254913	909	0,56,256,52,42,28,39,27	0,0,6,0,0,0,0,0	37,27,266,152,325	0,0,0,0,0	210	149	1	1	NA,1.0,0.968,1.0,1.0,1.0,1.0,1.0	1.0,1.0,1.0,1.0,1.0	-0.005	SE
910	Choren_v00_mik.OX359199.1G1085	NA	chrOX359199.1	+	7210183	7210267	7209927	7210074	7210404	7210529	910	1,38,332,69,88,8,20,48	0,0,0,0,6,0,0,0	40,18,507,766,362	0,0,0,0,4	233	149	1	1	1.0,1.0,1.0,1.0,0.904,1.0,1.0,1.0	1.0,1.0,1.0,1.0,0.983	-0.009	SE
911	Choren_v00_mik.OX359199.1G1085	NA	chrOX359199.1	+	7222723	7222941	7222530	7222668	7223007	7223161	911	2.41005e+26	0,3,0,1,0,7,11,15	910398421344199	11,0,0,1,1	298	149	1	1	1.0,0.994,1.0,0.997,1.0,0.985,0.988,0.978	0.976,1.0,1.0,0.994,0.99	0.001	SE
912	Choren_v00_mik.OX359199.1G1078	NA	chrOX359199.1	+	7191946	7192049	7191733	7191887	7192107	7192237	912	1,19,196,35,19,19,92,40	0,0,0,0,0,0,0,0	49,9,68,160,46	2,0,0,0,0	252	149	1	1	1.0,1.0,1.0,1.0,1.0,1.0,1.0,1.0	0.935,1.0,1.0,1.0,1.0	0.013	SE
913	Choren_v00_mik.OX359199.1G1074	NA	chrOX359199.1	+	7182029	7182096	7181716	7181856	7182156	7182360	913	2.39254e+24	0,6,0,0,0,0,2,0	619374472326192	0,0,0,0,0	216	149	1	1	1.0,0.991,1.0,1.0,1.0,1.0,0.995,1.0	1.0,1.0,1.0,1.0,1.0	-0.002	SE
914	Choren_v00_mik.OX359199.1G1074	NA	chrOX359199.1	+	7186349	7186430	7186164	7186245	7186695	7186803	914	7.61953e+29	0,2,2,0,0,4,4,0	2271605947539400	0,0,8,0,0	230	149	1	1	1.0,0.998,0.999,1.0,1.0,0.997,0.999,1.0	1.0,1.0,0.987,1.0,1.0	0.002	SE
915	Choren_v00_mik.OX359199.1G1072	NA	chrOX359199.1	+	7167393	7167474	7167159	7167275	7167543	7168203	915	0,148,390,112,137,111,131,121	0,0,0,0,0,0,1,0	85,41,140,201,105	0,0,0,0,0	230	149	1	1	NA,1.0,1.0,1.0,1.0,1.0,0.988,1.0	1.0,1.0,1.0,1.0,1.0	-0.002	SE
917	Choren_v00_mik.OX359199.1G1061	NA	chrOX359199.1	+	7135143	7135241	7134870	7134873	7135742	7135923	917	0,27,296,7,51,21,6,6	0,0,2,0,0,0,0,0	15,2,3,2,4	0,0,0,0,0	247	149	1	1	NA,1.0,0.989,1.0,1.0,1.0,1.0,1.0	1.0,1.0,1.0,1.0,1.0	-0.002	SE
918	Choren_v00_mik.OX359199.1G1061	NA	chrOX359199.1	+	7135143	7135241	7134870	7134873	7136829	7136887	918	0,10,24,0,14,13,2,1	0,0,2,0,0,0,0,0	0,0,2,0,0	0,0,0,0,0	247	149	1	1	NA,1.0,0.879,NA,1.0,1.0,1.0,1.0	NA,NA,1.0,NA,NA	-0.02	SE
919	Choren_v00_mik.OX359199.1G1061	NA	chrOX359199.1	+	7135739	7135923	7135143	7135241	7136829	7136887	919	0,34,491,4,90,17,22,23	0,0,0,0,0,0,0,0	2,7,20,6,2	0,0,1,0,0	298	149	1	1	NA,1.0,1.0,1.0,1.0,1.0,1.0,1.0	1.0,1.0,0.909,1.0,1.0	0.018	SE
920	Choren_v00_mik.OX359199.1G1061	NA	chrOX359199.1	+	7135742	7135923	7134870	7134873	7136829	7136887	920	0,30,466,4,68,17,19,23	0,0,2,0,0,0,0,0	2,7,14,6,2	0,0,0,0,0	298	149	1	1	NA,1.0,0.991,1.0,1.0,1.0,1.0,1.0	1.0,1.0,1.0,1.0,1.0	-0.001	SE
921	Choren_v00_mik.OX359199.1G1061	NA	chrOX359199.1	+	7135742	7135923	7135143	7135241	7136829	7136887	921	0,48,750,11,106,26,24,29	0,0,0,0,0,0,0,0	17,9,16,8,6	0,0,1,0,0	298	149	1	1	NA,1.0,1.0,1.0,1.0,1.0,1.0,1.0	1.0,1.0,0.889,1.0,1.0	0.022	SE
922	Choren_v00_mik.OX359199.1G1069	NA	chrOX359199.1	-	7122292	7122445	7121026	7121156	7122519	7122617	922	8,69,1482,462,6,31,4,248	0,0,2,0,0,0,0,0	251162243272298	0,0,0,0,0	298	149	1	1	1.0,1.0,0.997,1.0,1.0,1.0,1.0,1.0	1.0,1.0,1.0,1.0,1.0	0	SE
923	Choren_v00_mik.OX359199.1G1055	NA	chrOX359199.1	+	7075442	7075799	7075044	7075104	7076432	7076555	923	2.3181e+22	0,0,5,1,0,0,0,0	183,108,112,374,52	0,0,0,0,0	298	149	1	1	1.0,1.0,0.99,0.991,1.0,1.0,1.0,1.0	1.0,1.0,1.0,1.0,1.0	-0.002	SE
924	Choren_v00_mik.OX359199.1G1055	NA	chrOX359199.1	+	7076432	7076555	7075442	7075799	7076797	7076978	924	0,252,871,190,231,211,213,88	0,1,2,0,1,0,0,2	116,94,105,299,67	0,0,0,1,0	272	149	1	1	NA,0.993,0.996,1.0,0.992,1.0,1.0,0.96	1.0,1.0,1.0,0.994,1.0	-0.007	SE
925	Choren_v00_mik.OX359199.1G1055	NA	chrOX359199.1	+	7077123	7077242	7076797	7076978	7077613	7077648	925	0,211,741,234,180,174,249,99	0,0,0,0,1,0,0,0	174,66,127,332,38	0,0,0,0,0	268	149	1	1	NA,1.0,1.0,1.0,0.99,1.0,1.0,1.0	1.0,1.0,1.0,1.0,1.0	-0.001	SE
927	Choren_v00_mik.OX359199.1G1048	NA	chrOX359199.1	+	7048312	7048398	7048103	7048220	7048514	7049208	927	4.40886e+21	0,0,0,0,0,0,0,0	247106439437477	0,0,0,0,1	235	149	1	1	1.0,1.0,1.0,1.0,1.0,1.0,1.0,1.0	1.0,1.0,1.0,1.0,0.997	0.001	SE
928	Choren_v00_mik.OX359199.1G1052	NA	chrOX359199.1	-	7039593	7039659	7039064	7039144	7039759	7039892	928	0,81,446,43,95,70,79,49	0,0,2,0,0,0,0,0	54,44,199,331,141	0,0,0,0,0	215	149	1	1	NA,1.0,0.994,1.0,1.0,1.0,1.0,1.0	1.0,1.0,1.0,1.0,1.0	-0.001	SE
929	Choren_v00_mik.OX359199.1G1083	NA	chrOX359199.1	+	7204069	7204147	7203739	7203846	7204436	7204493	929	0,2,24,1,0,5,0,0	0,0,4,0,0,0,2,0	21,38,276,495,299	6,10,0,18,0	227	149	1	1	NA,1.0,0.798,1.0,NA,1.0,0.0,NA	0.697,0.714,1.0,0.948,1.0	-0.112	SE
930	Choren_v00_mik.OX359199.1G1083	NA	chrOX359199.1	+	7204069	7204147	7203739	7203846	7204608	7204744	930	0,1,7,0,0,0,0,0	0,0,0,0,0,0,0,0	7,15,79,128,100	0,0,0,0,2	227	149	1	1	NA,1.0,1.0,NA,NA,NA,NA,NA	1.0,1.0,1.0,1.0,0.97	0.006	SE
931	Choren_v00_mik.OX359199.1G1083	NA	chrOX359199.1	+	7204436	7204493	7203739	7203846	7204608	7204744	931	0,1,4,0,0,2,2,0	0,0,0,0,0,0,0,0	13,26,30,189,26	0,0,0,0,2	206	149	1	1	NA,1.0,1.0,NA,NA,1.0,1.0,NA	1.0,1.0,1.0,1.0,0.904	0.019	SE
932	Choren_v00_mik.OX359199.1G1083	NA	chrOX359199.1	+	7204436	7204493	7204069	7204147	7204608	7204744	932	0,2,17,1,0,7,0,0	0,0,0,0,0,0,0,0	21,39,227,545,226	0,0,0,8,0	206	149	1	1	NA,1.0,1.0,1.0,NA,1.0,NA,NA	1.0,1.0,1.0,0.98,1.0	0.004	SE
933	Choren_v00_mik.OX359199.1G1046	NA	chrOX359199.1	+	7034517	7034616	7034279	7034407	7034687	7034798	933	2,83,104,26,35,25,28,10	0,0,0,0,0,0,0,0	21,15,1015,239,1278	0,0,0,0,2	248	149	1	1	1.0,1.0,1.0,1.0,1.0,1.0,1.0,1.0	1.0,1.0,1.0,1.0,0.997	0.001	SE
935	Choren_v00_mik.OX359199.1G1038	NA	chrOX359199.1	+	6985982	6986171	6984706	6984837	6986409	6986485	935	3.19933e+26	0,0,0,0,0,0,0,0	9.12285e+17	0,0,4,0,0	298	149	1	1	1.0,1.0,1.0,1.0,1.0,1.0,1.0,1.0	1.0,1.0,0.996,1.0,1.0	0.001	SE
936	Choren_v00_mik.OX359199.1G1034	NA	chrOX359199.1	+	6966902	6966958	6966520	6966625	6967016	6967119	936	0,37,111,83,31,21,151,20	0,0,0,0,0,0,0,0	46,15,72,64,36	0,0,0,0,3	205	149	1	1	NA,1.0,1.0,1.0,1.0,1.0,1.0,1.0	1.0,1.0,1.0,1.0,0.897	0.021	SE
937	Choren_v00_mik.OX359199.1G1031	NA	chrOX359199.1	+	6962358	6962477	6962184	6962254	6962712	6962772	937	3.01375e+28	0,0,0,1,0,0,0,0	668382659767566	0,0,0,0,0	268	149	1	1	1.0,1.0,1.0,0.998,1.0,1.0,1.0,1.0	1.0,1.0,1.0,1.0,1.0	0	SE
939	Choren_v00_mik.OX359199.1G1024	NA	chrOX359199.1	+	6939575	6939701	6939138	6939286	6939968	6940184	939	2,300,1067,47,315,199,87,78	0,4,4,3,0,0,0,0	73,39,915,690,1116	0,0,0,0,0	275	149	1	1	1.0,0.976,0.993,0.895,1.0,1.0,1.0,1.0	1.0,1.0,1.0,1.0,1.0	-0.017	SE
940	Choren_v00_mik.OX359199.1G1024	NA	chrOX359199.1	+	6941724	6941838	6941551	6941647	6941915	6942009	940	6.34922e+22	0,0,0,0,0,0,0,0	128,93,2190,1661,2609	0,0,0,0,1	263	149	1	1	1.0,1.0,1.0,1.0,1.0,1.0,1.0,1.0	1.0,1.0,1.0,1.0,0.999	0	SE
941	Choren_v00_mik.OX359199.1G1024	NA	chrOX359199.1	+	6943265	6943427	6943098	6943197	6943479	6943541	941	2.49025e+22	0,0,0,0,0,0,0,0	1.53109e+17	0,0,0,0,4	298	149	1	1	1.0,1.0,1.0,1.0,1.0,1.0,1.0,1.0	1.0,1.0,1.0,1.0,0.997	0.001	SE
942	Choren_v00_mik.OX359199.1G1020	NA	chrOX359199.1	-	6915090	6915249	6914490	6914773	6915650	6915737	942	2,64,230,37,86,20,59,50	0,0,0,0,0,0,0,0	55,15,185,114,97	0,0,0,0,2	298	149	1	1	1.0,1.0,1.0,1.0,1.0,1.0,1.0,1.0	1.0,1.0,1.0,1.0,0.96	0.008	SE
944	Choren_v00_mik.OX359199.1G1019	NA	chrOX359199.1	-	6897412	6897466	6896844	6896896	6902982	6903096	944	1.12796e+22	0,0,0,0,0,0,0,2	283,66,203,210,131	0,0,0,0,0	203	149	1	1	1.0,1.0,1.0,1.0,1.0,1.0,1.0,0.988	1.0,1.0,1.0,1.0,1.0	-0.002	SE
945	Choren_v00_mik.OX359199.1G1019	NA	chrOX359199.1	-	6904651	6904720	6904103	6904131	6907318	6907383	945	5.28765e+21	0,0,3,0,0,0,8,2	230,85,145,171,101	0,2,2,0,0	218	149	1	1	1.0,1.0,0.993,1.0,1.0,1.0,0.975,0.987	1.0,0.967,0.98,1.0,1.0	0.005	SE
946	Choren_v00_mik.OX359199.1G1019	NA	chrOX359199.1	-	6908490	6908546	6908269	6908329	6909742	6909803	946	5.21343e+21	0,0,0,0,0,0,0,0	232,85,98,136,68	0,0,0,0,1	205	149	1	1	1.0,1.0,1.0,1.0,1.0,1.0,1.0,1.0	1.0,1.0,1.0,1.0,0.98	0.004	SE
948	Choren_v00_mik.OX359199.1G1013	NA	chrOX359199.1	-	6874790	6874959	6874598	6874690	6876549	6876678	948	3,80,350,94,111,68,85,85	0,0,0,0,1,0,0,0	53,36,66,81,10	0,0,0,0,0	298	149	1	1	1.0,1.0,1.0,1.0,0.982,1.0,1.0,1.0	1.0,1.0,1.0,1.0,1.0	-0.002	SE
949	Choren_v00_mik.OX359199.1G1013	NA	chrOX359199.1	-	6876549	6876678	6874790	6874959	6880414	6880588	949	1,90,229,55,124,75,110,80	0,0,1,0,0,0,0,0	60,26,70,69,17	0,0,0,0,0	278	149	1	1	1.0,1.0,0.992,1.0,1.0,1.0,1.0,1.0	1.0,1.0,1.0,1.0,1.0	-0.001	SE
950	Choren_v00_mik.OX359199.1G1013	NA	chrOX359199.1	-	6880414	6880588	6876549	6876678	6882190	6882298	950	0,93,202,37,123,90,99,82	0,0,1,0,0,0,0,0	60,22,59,82,24	0,0,0,0,0	298	149	1	1	NA,1.0,0.99,1.0,1.0,1.0,1.0,1.0	1.0,1.0,1.0,1.0,1.0	-0.001	SE
951	Choren_v00_mik.OX359199.1G1013	NA	chrOX359199.1	-	6880414	6880666	6876549	6876678	6882190	6882298	951	0,53,74,23,66,53,62,36	0,0,1,0,0,0,0,0	25,9,38,41,16	0,0,0,0,0	298	149	1	1	NA,1.0,0.974,1.0,1.0,1.0,1.0,1.0	1.0,1.0,1.0,1.0,1.0	-0.004	SE
952	Choren_v00_mik.OX359199.1G1013	NA	chrOX359199.1	-	6882190	6882298	6880414	6880588	6882913	6882991	952	0,53,203,28,81,60,69,57	0,0,0,0,0,0,1,0	45,21,33,84,25	0,0,0,0,0	257	149	1	1	NA,1.0,1.0,1.0,1.0,1.0,0.976,1.0	1.0,1.0,1.0,1.0,1.0	-0.003	SE
953	Choren_v00_mik.OX359199.1G1011	NA	chrOX359199.1	+	6868604	6868637	6868486	6868505	6868807	6868981	953	0,76,236,98,39,52,55,74	0,0,0,0,0,0,0,0	52,23,282,193,287	0,0,0,2,0	182	149	1	1	NA,1.0,1.0,1.0,1.0,1.0,1.0,1.0	1.0,1.0,1.0,0.988,1.0	0.002	SE
955	Choren_v00_mik.OX359199.1G1002	NA	chrOX359199.1	+	6853334	6853445	6853194	6853260	6853505	6853657	955	7,106,390,126,112,114,176,84	0,0,0,0,0,0,0,0	121,38,459,680,453	0,0,4,2,1	260	149	1	1	1.0,1.0,1.0,1.0,1.0,1.0,1.0,1.0	1.0,1.0,0.985,0.995,0.996	0.005	SE
956	Choren_v00_mik.OX359199.1G1002	NA	chrOX359199.1	+	6853505	6853657	6853194	6853260	6853797	6854059	956	7,66,189,112,81,96,109,69	0,0,0,0,0,0,0,0	113,38,287,386,253	0,0,0,2,4	298	149	1	1	1.0,1.0,1.0,1.0,1.0,1.0,1.0,1.0	1.0,1.0,1.0,0.99,0.969	0.008	SE
957	Choren_v00_mik.OX359199.1G1008	NA	chrOX359199.1	-	6848356	6848509	6847545	6847596	6849359	6849459	957	2.22471e+21	0,0,0,1,0,0,2,0	129,51,88,116,70	0,0,0,0,0	298	149	1	1	1.0,1.0,1.0,0.99,1.0,1.0,0.984,1.0	1.0,1.0,1.0,1.0,1.0	-0.003	SE
958	Choren_v00_mik.OX359199.1G1001	NA	chrOX359199.1	+	6833055	6833117	6831941	6831982	6833854	6833934	958	1.21113e+22	0,0,0,0,1,0,0,0	122,57,672,288,518	0,0,0,1,0	211	149	1	1	1.0,1.0,1.0,1.0,0.995,1.0,1.0,1.0	1.0,1.0,1.0,0.995,1.0	0	SE
959	Choren_v00_mik.OX359199.1G1001	NA	chrOX359199.1	+	6833055	6833117	6831941	6831982	6836011	6836077	959	0,61,394,52,120,41,46,46	0,0,1,0,0,0,0,0	30,16,215,60,110	0,0,0,0,0	211	149	1	1	NA,1.0,0.996,1.0,1.0,1.0,1.0,1.0	1.0,1.0,1.0,1.0,1.0	-0.001	SE
960	Choren_v00_mik.OX359199.1G1001	NA	chrOX359199.1	+	6833854	6833934	6831941	6831982	6836011	6836077	960	1,134,497,118,141,122,195,90	0,0,1,0,0,0,0,0	83,22,376,236,327	0,0,0,0,0	229	149	1	1	1.0,1.0,0.997,1.0,1.0,1.0,1.0,1.0	1.0,1.0,1.0,1.0,1.0	0	SE
961	Choren_v00_mik.OX359199.1G1001	NA	chrOX359199.1	+	6833854	6833934	6833055	6833117	6836011	6836077	961	2.28414e+22	0,0,0,0,0,0,3,0	176,62,829,468,738	0,0,0,1,3	229	149	1	1	1.0,1.0,1.0,1.0,1.0,1.0,0.988,1.0	1.0,1.0,1.0,0.997,0.994	0	SE
962	Choren_v00_mik.OX359202.1G593	NA	chrOX359202.1	+	4396422	4396434	4396112	4396371	4396497	4396619	962	0,0,0,0,0,0,0,0	0,69,339,16,111,31,0,9	0,0,0,0,2	1,1,105,63,496	161	149	1	1	NA,0.0,0.0,0.0,0.0,0.0,NA,0.0	0.0,0.0,0.0,0.0,0.004	-0.001	SE
963	Choren_v00_mik.OX359199.1G998	NA	chrOX359199.1	+	6811287	6811391	6811127	6811190	6811746	6811788	963	0,222,661,77,191,144,69,86	0,0,0,0,0,0,0,0	98,92,2339,1167,2751	2,0,0,6,3	253	149	1	1	NA,1.0,1.0,1.0,1.0,1.0,1.0,1.0	0.967,1.0,1.0,0.991,0.998	0.009	SE
964	Choren_v00_mik.OX359199.1G998	NA	chrOX359199.1	+	6811513	6811648	6811287	6811391	6811746	6811788	964	0,0,0,0,0,0,0,0	0,83,229,43,105,59,39,26	1,0,0,1,2	42,35,975,458,1142	284	149	1	1	NA,0.0,0.0,0.0,0.0,0.0,0.0,0.0	0.012,0.0,0.0,0.001,0.001	-0.003	SE
965	Choren_v00_mik.OX359199.1G998	NA	chrOX359199.1	+	6812076	6812150	6811746	6811788	6812362	6812420	965	0,154,485,88,150,128,92,62	0,0,2,0,0,1,0,0	65,65,1848,870,2174	0,0,1,0,0	223	149	1	1	NA,1.0,0.994,1.0,1.0,0.988,1.0,1.0	1.0,1.0,0.999,1.0,1.0	-0.002	SE
966	Choren_v00_mik.OX359199.1G998	NA	chrOX359199.1	+	6813092	6813195	6812874	6813008	6813340	6813582	966	2.35711e+22	0,0,0,0,0,0,0,0	1.96113e+17	0,0,2,0,0	252	149	1	1	1.0,1.0,1.0,1.0,1.0,1.0,1.0,1.0	1.0,1.0,0.999,1.0,1.0	0	SE
969	Choren_v00_mik.OX359199.1G995	NA	chrOX359199.1	-	6769337	6769472	6764893	6765018	6771920	6772099	969	0,102,452,94,168,118,220,89	0,0,2,0,0,0,0,0	133,49,459,316,724	0,0,0,0,0	284	149	1	1	NA,1.0,0.992,1.0,1.0,1.0,1.0,1.0	1.0,1.0,1.0,1.0,1.0	-0.001	SE
970	Choren_v00_mik.OX359199.1G995	NA	chrOX359199.1	-	6769337	6769472	6768018	6768097	6771920	6772099	970	0,103,465,94,175,119,221,91	0,0,0,0,0,1,0,0	133,49,467,317,749	0,0,0,0,0	284	149	1	1	NA,1.0,1.0,1.0,1.0,0.984,1.0,1.0	1.0,1.0,1.0,1.0,1.0	-0.002	SE
972	Choren_v00_mik.OX359199.1G995	NA	chrOX359199.1	-	6772626	6772735	6769337	6769472	6773028	6773140	972	1,88,379,53,126,82,137,93	0,0,0,0,0,0,0,0	87,49,459,218,506	0,0,0,3,0	258	149	1	1	1.0,1.0,1.0,1.0,1.0,1.0,1.0,1.0	1.0,1.0,1.0,0.977,1.0	0.005	SE
973	Choren_v00_mik.OX359199.1G995	NA	chrOX359199.1	-	6773028	6773140	6769337	6769472	6773900	6774269	973	1,83,390,27,133,82,105,61	0,0,1,0,0,0,0,0	88,51,435,191,463	0,0,0,0,2	261	149	1	1	1.0,1.0,0.996,1.0,1.0,1.0,1.0,1.0	1.0,1.0,1.0,1.0,0.992	0.001	SE
974	Choren_v00_mik.OX359199.1G991	NA	chrOX359199.1	-	6746056	6746197	6745846	6745957	6746524	6746577	974	2.26956e+21	0,0,0,0,0,0,0,1	300,34,2826,1916,1782	0,0,0,0,0	290	149	1	1	1.0,1.0,1.0,1.0,1.0,1.0,1.0,0.993	1.0,1.0,1.0,1.0,1.0	-0.001	SE
975	Choren_v00_mik.OX359199.1G991	NA	chrOX359199.1	-	6746524	6746577	6746056	6746197	6746722	6746954	975	0,188,341,179,186,128,245,204	0,0,0,0,0,0,0,0	146,23,2152,1156,1266	0,0,0,1,0	202	149	1	1	NA,1.0,1.0,1.0,1.0,1.0,1.0,1.0	1.0,1.0,1.0,0.999,1.0	0	SE
976	Choren_v00_mik.OX359199.1G991	NA	chrOX359199.1	-	6751425	6751484	6748618	6748713	6752352	6752406	976	0,82,230,73,73,46,32,109	0,0,4,0,0,1,0,0	103,14,1520,984,1431	0,0,13,0,16	208	149	1	1	NA,1.0,0.976,1.0,1.0,0.971,1.0,1.0	1.0,1.0,0.988,1.0,0.985	-0.002	SE
977	Choren_v00_mik.OX359199.1G991	NA	chrOX359199.1	-	6752352	6752406	6748618	6748713	6752823	6752918	977	0,31,68,12,20,6,10,24	0,0,0,0,0,0,0,0	19,7,479,252,429	0,0,1,0,0	203	149	1	1	NA,1.0,1.0,1.0,1.0,1.0,1.0,1.0	1.0,1.0,0.997,1.0,1.0	0.001	SE
978	Choren_v00_mik.OX359199.1G985	NA	chrOX359199.1	-	6730138	6730191	6729953	6730062	6730368	6730456	978	2.11198e+26	0,0,0,0,0,1,0,0	8142586941212540	0,0,0,0,3	202	149	1	1	1.0,1.0,1.0,1.0,1.0,0.999,1.0,1.0	1.0,1.0,1.0,1.0,0.993	0.001	SE
979	Choren_v00_mik.OX359199.1G981	NA	chrOX359199.1	+	6716849	6716902	6716495	6716559	6717066	6717201	979	3,116,512,108,204,90,144,57	0,0,0,0,0,0,0,2	84,52,56,84,41	0,0,0,0,0	202	149	1	1	1.0,1.0,1.0,1.0,1.0,1.0,1.0,0.955	1.0,1.0,1.0,1.0,1.0	-0.006	SE
980	Choren_v00_mik.OX359199.1G981	NA	chrOX359199.1	+	6718101	6718344	6717334	6717402	6718502	6718608	980	3.32413e+22	0,0,0,0,0,0,0,0	267,85,147,319,181	0,0,1,0,0	298	149	1	1	1.0,1.0,1.0,1.0,1.0,1.0,1.0,1.0	1.0,1.0,0.987,1.0,1.0	0.003	SE
981	Choren_v00_mik.OX359199.1G977	NA	chrOX359199.1	+	6710948	6711146	6709890	6710064	6712142	6712284	981	0,83,291,88,102,69,199,79	0,0,4,0,0,0,2,0	91,30,108,86,87	0,0,0,0,0	298	149	1	1	NA,1.0,0.973,1.0,1.0,1.0,0.98,1.0	1.0,1.0,1.0,1.0,1.0	-0.007	SE
982	Choren_v00_mik.OX359199.1G978	NA	chrOX359199.1	-	6684185	6684239	6683776	6683896	6684352	6684501	982	12,93,514,42,163,28,129,103	0,0,0,0,0,0,0,0	192,9,332,226,195	0,0,0,5,0	203	149	1	1	1.0,1.0,1.0,1.0,1.0,1.0,1.0,1.0	1.0,1.0,1.0,0.971,1.0	0.006	SE
983	Choren_v00_mik.OX359199.1G971	NA	chrOX359199.1	-	6629680	6629744	6629487	6629613	6629823	6629916	983	0,234,1215,168,232,259,241,107	0,0,0,4,0,0,0,0	67,74,142,305,80	0,0,0,0,0	213	149	1	1	NA,1.0,1.0,0.967,1.0,1.0,1.0,1.0	1.0,1.0,1.0,1.0,1.0	-0.005	SE
984	Choren_v00_mik.OX359199.1G952	NA	chrOX359199.1	+	6594960	6595020	6594414	6594551	6595444	6596140	984	1,57,314,46,65,71,142,55	0,0,0,0,0,0,0,0	50,18,25,37,17	0,0,4,0,0	209	149	1	1	1.0,1.0,1.0,1.0,1.0,1.0,1.0,1.0	1.0,1.0,0.817,1.0,1.0	0.037	SE
985	Choren_v00_mik.OX359199.1G959	NA	chrOX359199.1	-	6563122	6563287	6562348	6562788	6565049	6565185	985	9.44762e+21	0,0,0,0,3,0,0,0	286108878144583	0,0,0,0,0	298	149	1	1	1.0,1.0,1.0,1.0,0.989,1.0,1.0,1.0	1.0,1.0,1.0,1.0,1.0	-0.001	SE
986	Choren_v00_mik.OX359199.1G956	NA	chrOX359199.1	-	6543639	6544152	6543367	6543493	6544506	6544531	986	0,62,106,0,102,38,70,30	0,0,0,0,0,0,0,12	40,8,45,28,12	2,2,0,0,0	298	149	1	1	NA,1.0,1.0,NA,1.0,1.0,1.0,0.556	0.909,0.667,1.0,1.0,1.0	0.011	SE
987	Choren_v00_mik.OX359202.1G642	NA	chrOX359202.1	+	4766199	4766405	4765973	4766016	4766708	4766820	987	0,0,14,0,5,0,0,0	0,0,0,0,0,0,0,0	0,1,1518,4,2338	0,0,0,0,1	298	149	1	1	NA,NA,1.0,NA,1.0,NA,NA,NA	NA,1.0,1.0,1.0,0.999	0	SE
988	Choren_v00_mik.OX359199.1G940	NA	chrOX359199.1	-	6501878	6502049	6501552	6501698	6502139	6502231	988	1.81368e+29	0,0,5,1,0,0,2,0	860248761788304	0,0,0,4,0	298	149	1	1	1.0,1.0,0.999,0.998,1.0,1.0,0.997,1.0	1.0,1.0,1.0,0.99,1.0	0.001	SE
989	Choren_v00_mik.OX359199.1G940	NA	chrOX359199.1	-	6511557	6511702	6511343	6511443	6511792	6511886	989	0,145,695,108,384,140,56,128	0,0,0,0,0,0,0,0	10,6,78,348,67	0,0,0,4,0	294	149	1	1	NA,1.0,1.0,1.0,1.0,1.0,1.0,1.0	1.0,1.0,1.0,0.978,1.0	0.004	SE
990	Choren_v00_mik.OX359199.1G932	NA	chrOX359199.1	+	6478933	6479028	6478781	6478846	6479095	6479170	990	4,46,445,114,114,34,218,348	0,0,2,0,0,0,0,0	389,16,71,94,63	0,0,0,0,0	244	149	1	1	1.0,1.0,0.993,1.0,1.0,1.0,1.0,1.0	1.0,1.0,1.0,1.0,1.0	-0.001	SE
991	Choren_v00_mik.OX359199.1G926	NA	chrOX359199.1	+	6461923	6462009	6461463	6461667	6462079	6462200	991	0,50,321,36,37,66,30,66	0,0,0,0,0,0,0,0	51,23,67,100,20	0,0,1,0,0	235	149	1	1	NA,1.0,1.0,1.0,1.0,1.0,1.0,1.0	1.0,1.0,0.977,1.0,1.0	0.005	SE
992	Choren_v00_mik.OX359199.1G925	NA	chrOX359199.1	+	6455153	6455319	6454689	6454819	6455374	6455564	992	0,152,535,31,86,93,96,83	0,2,2,0,0,0,0,0	43,28,65,129,221	0,0,0,6,5	298	149	1	1	NA,0.974,0.993,1.0,1.0,1.0,1.0,1.0	1.0,1.0,1.0,0.915,0.957	0.021	SE
993	Choren_v00_mik.OX359199.1G929	NA	chrOX359199.1	-	6451467	6451534	6450842	6450892	6452016	6452090	993	2.23963e+21	0,0,0,0,0,0,0,0	3.63131e+17	0,1,1,0,0	216	149	1	1	1.0,1.0,1.0,1.0,1.0,1.0,1.0,1.0	1.0,0.989,0.999,1.0,1.0	0.002	SE
994	Choren_v00_mik.OX359199.1G929	NA	chrOX359199.1	-	6453214	6453283	6452991	6453049	6453537	6453806	994	0,250,835,210,185,434,57,414	0,0,0,0,0,0,0,0	4.31113e+16	0,0,2,0,0	218	149	1	1	NA,1.0,1.0,1.0,1.0,1.0,1.0,1.0	1.0,1.0,0.999,1.0,1.0	0	SE
995	Choren_v00_mik.OX359199.1G913	NA	chrOX359199.1	-	6394494	6394542	6394222	6394348	6394885	6395103	995	0,167,203,188,69,158,260,277	0,0,1,0,0,0,0,0	171,22,55,72,34	0,0,0,0,0	197	149	1	1	NA,1.0,0.994,1.0,1.0,1.0,1.0,1.0	1.0,1.0,1.0,1.0,1.0	-0.001	SE
997	Choren_v00_mik.OX359199.1G907	NA	chrOX359199.1	-	6361760	6361832	6361500	6361637	6361975	6362087	997	1.43761e+23	0,0,0,0,2,0,0,0	261108949369287	0,0,0,0,0	221	149	1	1	1.0,1.0,1.0,1.0,0.991,1.0,1.0,1.0	1.0,1.0,1.0,1.0,1.0	-0.001	SE
998	Choren_v00_mik.OX359200.1G589	NA	chrOX359200.1	-	4303672	4303789	4303381	4303512	4304461	4304682	998	0,100,161,23,57,29,20,1	0,0,1,0,0,0,0,0	20,16,19,33,46	0,0,0,0,0	266	149	1	1	NA,1.0,0.989,1.0,1.0,1.0,1.0,1.0	1.0,1.0,1.0,1.0,1.0	-0.002	SE
999	Choren_v00_mik.OX359200.1G589	NA	chrOX359200.1	-	4311301	4311622	4310314	4310482	4312028	4312078	999	0,65,176,44,125,59,31,30	0,0,0,1,0,0,0,0	30,28,37,94,45	0,0,0,0,0	298	149	1	1	NA,1.0,1.0,0.957,1.0,1.0,1.0,1.0	1.0,1.0,1.0,1.0,1.0	-0.006	SE
1000	Choren_v00_mik.OX359199.1G895	NA	chrOX359199.1	+	6344759	6344952	6344443	6344598	6345122	6345291	1000	0,301,287,292,213,204,292,360	0,0,0,0,0,2,0,2	187,92,523,566,237	0,0,0,0,0	298	149	1	1	NA,1.0,1.0,1.0,1.0,0.981,1.0,0.989	1.0,1.0,1.0,1.0,1.0	-0.004	SE
1001	Choren_v00_mik.OX359200.1G1013	NA	chrOX359200.1	+	7004416	7004450	7004068	7004147	7004953	7005096	1001	1,107,927,88,176,124,112,148	0,0,1,0,0,0,0,0	81,51,138,224,220	0,0,0,0,0	183	149	1	1	1.0,1.0,0.999,1.0,1.0,1.0,1.0,1.0	1.0,1.0,1.0,1.0,1.0	0	SE
1002	Choren_v00_mik.OX359200.1G1013	NA	chrOX359200.1	+	7006742	7006834	7006565	7006595	7008165	7008279	1002	0,132,754,77,208,137,143,136	0,2,0,0,0,0,0,0	85,32,136,264,60	0,0,0,0,0	241	149	1	1	NA,0.976,1.0,1.0,1.0,1.0,1.0,1.0	1.0,1.0,1.0,1.0,1.0	-0.003	SE
1003	Choren_v00_mik.OX359200.1G1013	NA	chrOX359200.1	+	7012179	7012256	7011905	7012020	7012474	7012614	1003	3.50014e+22	0,0,3,2,0,0,0,0	138,87,217,518,233	0,0,0,0,0	226	149	1	1	1.0,1.0,0.997,0.994,1.0,1.0,1.0,1.0	1.0,1.0,1.0,1.0,1.0	-0.001	SE
1004	Choren_v00_mik.OX359199.1G884	NA	chrOX359199.1	-	6257554	6257673	6257186	6257319	6257798	6257854	1004	1,20,235,32,55,42,126,31	0,0,0,0,0,0,0,0	44,8,2144,281,863	0,0,0,1,0	268	149	1	1	1.0,1.0,1.0,1.0,1.0,1.0,1.0,1.0	1.0,1.0,1.0,0.994,1.0	0.001	SE
1005	Choren_v00_mik.OX359199.1G884	NA	chrOX359199.1	-	6257911	6257982	6257798	6257854	6258063	6258110	1005	0,53,369,82,110,42,84,95	0,0,0,0,0,0,0,0	64,22,2012,450,1764	0,0,7,0,0	220	149	1	1	NA,1.0,1.0,1.0,1.0,1.0,1.0,1.0	1.0,1.0,0.995,1.0,1.0	0.001	SE
1006	Choren_v00_mik.OX359199.1G874	NA	chrOX359199.1	+	6218950	6219045	6218713	6218780	6219171	6219304	1006	2,277,382,73,144,98,125,239	0,0,0,0,0,0,0,2	103,34,128,69,32	0,0,0,0,2	244	149	1	1	1.0,1.0,1.0,1.0,1.0,1.0,1.0,0.986	1.0,1.0,1.0,1.0,0.907	0.017	SE
1007	Choren_v00_mik.OX359199.1G870	NA	chrOX359199.1	-	6169036	6169104	6168935	6168979	6169240	6169288	1007	2,73,388,27,156,20,91,87	0,0,0,0,0,0,2,0	43,6,39,21,19	0,0,0,0,0	217	149	1	1	1.0,1.0,1.0,1.0,1.0,1.0,0.969,1.0	1.0,1.0,1.0,1.0,1.0	-0.004	SE
1008	Choren_v00_mik.OX359199.1G865	NA	chrOX359199.1	-	6158896	6159001	6158053	6158338	6159257	6159392	1008	5,98,331,90,101,125,238,92	0,0,0,0,0,0,0,0	68,56,108,132,34	0,0,1,0,0	254	149	1	1	1.0,1.0,1.0,1.0,1.0,1.0,1.0,1.0	1.0,1.0,0.984,1.0,1.0	0.003	SE
1009	Choren_v00_mik.OX359199.1G865	NA	chrOX359199.1	-	6159257	6159392	6158896	6159001	6159641	6159778	1009	3,94,252,117,76,138,187,94	0,0,3,0,0,0,0,0	82,51,111,117,36	0,0,1,0,0	284	149	1	1	1.0,1.0,0.978,1.0,1.0,1.0,1.0,1.0	1.0,1.0,0.983,1.0,1.0	0.001	SE
1010	Choren_v00_mik.OX359199.1G859	NA	chrOX359199.1	+	6151538	6151627	6151382	6151482	6152493	6152611	1010	0,6,44,5,18,0,6,16	0,0,4,0,0,0,0,0	0,2,7,12,0	0,0,0,0,0	238	149	1	1	NA,1.0,0.873,1.0,1.0,NA,1.0,1.0	NA,1.0,1.0,1.0,NA	-0.021	SE
1011	Choren_v00_mik.OX359199.1G859	NA	chrOX359199.1	+	6153020	6153205	6152729	6152947	6153265	6153553	1011	0,0,72,0,9,0,12,5	0,0,3,0,0,0,0,0	0,8,2,14,0	0,0,0,0,0	298	149	1	1	NA,NA,0.923,NA,1.0,NA,1.0,1.0	NA,1.0,1.0,1.0,NA	-0.019	SE
1012	Choren_v00_mik.OX359199.1G863	NA	chrOX359199.1	-	6140295	6140330	6140185	6140234	6140585	6141590	1012	0,19,53,94,97,33,74,96	0,0,2,0,0,0,0,0	76,22,28,8,5	0,0,0,0,0	184	149	1	1	NA,1.0,0.955,1.0,1.0,1.0,1.0,1.0	1.0,1.0,1.0,1.0,1.0	-0.006	SE
1014	Choren_v00_mik.OX359200.1G108	NA	chrOX359200.1	+	395264	395382	394937	394977	397393	397474	1014	0,125,247,39,43,58,68,51	0,0,1,0,0,0,0,0	41,25,8,117,18	0,0,0,0,0	267	149	1	1	NA,1.0,0.993,1.0,1.0,1.0,1.0,1.0	1.0,1.0,1.0,1.0,1.0	-0.001	SE
1015	Choren_v00_mik.OX359200.1G108	NA	chrOX359200.1	+	396542	396588	394937	394977	397393	397474	1015	2,19,166,14,48,38,23,21	0,0,1,0,0,0,0,0	18,7,1,1,5	0,0,0,0,0	195	149	1	1	1.0,1.0,0.992,1.0,1.0,1.0,1.0,1.0	1.0,1.0,1.0,1.0,1.0	-0.001	SE
1016	Choren_v00_mik.OX359200.1G108	NA	chrOX359200.1	+	396542	396588	395264	395382	397393	397474	1016	0,83,426,50,112,97,75,78	0,0,1,1,0,0,4,0	51,48,7,37,27	0,0,0,0,0	195	149	1	1	NA,1.0,0.997,0.974,1.0,1.0,0.935,1.0	1.0,1.0,1.0,1.0,1.0	-0.013	SE
1017	Choren_v00_mik.OX359200.1G108	NA	chrOX359200.1	+	399807	399846	399643	399718	400418	400448	1017	6,196,391,123,135,153,198,76	0,0,3,0,0,0,2,0	106,19,41,123,22	0,0,0,0,1	188	149	1	1	1.0,1.0,0.99,1.0,1.0,1.0,0.987,1.0	1.0,1.0,1.0,1.0,0.946	0.008	SE
1018	Choren_v00_mik.OX359200.1G108	NA	chrOX359200.1	+	400418	400448	394937	394977	404282	404531	1018	1,52,103,43,34,43,83,23	0,0,0,2,0,0,0,0	22,2,6,7,11	0,0,0,0,0	179	149	1	1	1.0,1.0,1.0,0.947,1.0,1.0,1.0,1.0	1.0,1.0,1.0,1.0,1.0	-0.007	SE
1019	Choren_v00_mik.OX359200.1G108	NA	chrOX359200.1	+	400418	400448	399807	399846	404282	404531	1019	7,231,481,161,144,179,263,91	0,0,0,0,1,0,0,0	107,13,47,99,31	0,0,0,0,2	179	149	1	1	1.0,1.0,1.0,1.0,0.992,1.0,1.0,1.0	1.0,1.0,1.0,1.0,0.928	0.013	SE
1020	Choren_v00_mik.OX359199.1G851	NA	chrOX359199.1	+	6073184	6073262	6072912	6073099	6073416	6073677	1020	0,2,51,4,0,4,5,3	0,0,0,0,0,0,0,0	1,0,16,4,0	4,0,3,0,0	227	149	1	1	NA,1.0,1.0,1.0,NA,1.0,1.0,1.0	0.141,NA,0.778,1.0,NA	0.36	SE
1021	Choren_v00_mik.OX359199.1G850	NA	chrOX359199.1	+	6064864	6064905	6064457	6064616	6065016	6065145	1021	0,0,0,8,0,0,380,158	0,0,0,0,0,0,17,8	0,0,0,84,0	0,0,0,7,0	190	149	1	1	NA,NA,NA,1.0,NA,NA,0.946,0.939	NA,NA,NA,0.904,NA	0.058	SE
1022	Choren_v00_mik.OX359199.1G843	NA	chrOX359199.1	+	6036772	6036878	6035883	6035972	6037073	6037148	1022	0,200,772,109,168,201,230,135	0,2,13,3,2,0,6,4	61,39,466,383,411	2,0,0,0,2	255	149	1	1	NA,0.983,0.972,0.955,0.98,1.0,0.957,0.952	0.947,1.0,1.0,1.0,0.992	-0.017	SE
1023	Choren_v00_mik.OX359199.1G843	NA	chrOX359199.1	+	6039483	6039576	6039355	6039395	6040389	6040705	1023	2,59,527,75,142,55,436,200	0,0,0,2,0,0,0,0	80,26,241,237,193	0,0,0,0,0	242	149	1	1	1.0,1.0,1.0,0.958,1.0,1.0,1.0,1.0	1.0,1.0,1.0,1.0,1.0	-0.005	SE
1024	Choren_v00_mik.OX359199.1G848	NA	chrOX359199.1	-	6030665	6030795	6029913	6030007	6031341	6031416	1024	0,95,274,40,74,113,138,61	0,2,0,0,0,0,0,0	41,12,107,49,79	0,0,0,0,0	279	149	1	1	NA,0.962,1.0,1.0,1.0,1.0,1.0,1.0	1.0,1.0,1.0,1.0,1.0	-0.005	SE
1025	Choren_v00_mik.OX359199.1G845	NA	chrOX359199.1	-	6014975	6015046	6014701	6014840	6015251	6015366	1025	1,0,38,154,3,8,444,2	0,0,0,0,0,0,4,0	126,2,0,3,0	0,0,0,0,0	220	149	1	1	1.0,NA,1.0,1.0,1.0,1.0,0.987,1.0	1.0,1.0,NA,1.0,NA	-0.002	SE
1026	Choren_v00_mik.OX359199.1G838	NA	chrOX359199.1	+	5980368	5980472	5980098	5980198	5980558	5980670	1026	2,29,8,25,5,50,4,16	0,1,0,0,0,0,0,0	17,0,15,22,11	0,0,1,0,0	253	149	1	1	1.0,0.945,1.0,1.0,1.0,1.0,1.0,1.0	1.0,NA,0.898,1.0,1.0	0.019	SE
1027	Choren_v00_mik.OX359199.1G838	NA	chrOX359199.1	+	5982294	5982337	5982153	5982216	5982425	5982568	1027	1,33,22,47,12,56,57,59	0,0,0,1,0,0,0,0	62,5,21,17,14	0,0,0,0,0	192	149	1	1	1.0,1.0,1.0,0.973,1.0,1.0,1.0,1.0	1.0,1.0,1.0,1.0,1.0	-0.003	SE
1028	Choren_v00_mik.OX359199.1G834	NA	chrOX359199.1	+	5966618	5966687	5966343	5966486	5967067	5967337	1028	2,33,72,41,44,13,20,65	0,0,0,4,0,0,0,0	52,15,18,6,6	2,0,0,0,0	218	149	1	1	1.0,1.0,1.0,0.875,1.0,1.0,1.0,1.0	0.947,1.0,1.0,1.0,1.0	-0.005	SE
1029	Choren_v00_mik.OX359199.1G832	NA	chrOX359199.1	-	5939990	5940031	5939832	5939929	5940133	5940339	1029	1,14,85,5,41,6,18,11	0,4,0,0,0,1,0,2	8,0,5,67,19	0,0,0,0,0	190	149	1	1	1.0,0.733,1.0,1.0,1.0,0.825,1.0,0.812	1.0,NA,1.0,1.0,1.0	-0.079	SE
1030	Choren_v00_mik.OX359199.1G818	NA	chrOX359199.1	+	5845502	5845604	5845125	5845226	5845713	5845765	1030	0,8,1,0,7,2,6,2	0,0,0,0,0,4,0,0	2,1,3,3,0	0,0,0,0,0	251	149	1	1	NA,1.0,1.0,NA,1.0,0.229,1.0,1.0	1.0,1.0,1.0,1.0,NA	-0.128	SE
1031	Choren_v00_mik.OX359199.1G818	NA	chrOX359199.1	+	5848501	5848614	5848040	5848202	5848690	5848802	1031	1,2,4,0,0,13,126,45	0,0,0,0,0,0,0,0	10,5,19,9,1	0,0,0,2,0	262	149	1	1	1.0,1.0,1.0,NA,NA,1.0,1.0,1.0	1.0,1.0,1.0,0.719,1.0	0.056	SE
1032	Choren_v00_mik.OX359199.1G824	NA	chrOX359199.1	-	5826494	5826586	5825954	5826063	5826678	5826778	1032	0,14,107,24,26,3,15,8	0,0,0,0,0,0,2,0	25,1,13,24,6	0,0,0,0,0	241	149	1	1	NA,1.0,1.0,1.0,1.0,1.0,0.823,1.0	1.0,1.0,1.0,1.0,1.0	-0.025	SE
1033	Choren_v00_mik.OX359199.1G813	NA	chrOX359199.1	-	5760825	5761004	5760447	5760674	5761209	5761298	1033	4,209,234,137,45,83,191,6	0,0,0,0,0,2,0,0	47,58,0,67,2	0,0,0,0,0	298	149	1	1	1.0,1.0,1.0,1.0,1.0,0.954,1.0,1.0	1.0,1.0,NA,1.0,1.0	-0.006	SE
1034	Choren_v00_mik.OX359199.1G811	NA	chrOX359199.1	-	5740400	5740456	5740033	5740190	5740748	5740958	1034	2,9,26,29,30,8,22,0	0,0,0,0,1,0,0,0	0,4,0,0,0	0,0,0,0,2	205	149	1	1	1.0,1.0,1.0,1.0,0.956,1.0,1.0,NA	NA,1.0,NA,NA,0.0	0.494	SE
1035	Choren_v00_mik.OX359199.1G800	NA	chrOX359199.1	+	5707025	5707103	5706707	5706842	5707333	5707558	1035	0,108,423,69,98,87,77,70	0,0,0,0,2,0,0,0	48,17,191,97,183	0,0,0,0,0	227	149	1	1	NA,1.0,1.0,1.0,0.97,1.0,1.0,1.0	1.0,1.0,1.0,1.0,1.0	-0.004	SE
1036	Choren_v00_mik.OX359199.1G803	NA	chrOX359199.1	-	5693226	5693283	5692298	5692487	5694263	5694425	1036	1,79,152,40,63,90,139,93	0,0,0,0,0,0,0,0	33,62,59,105,48	0,0,0,1,0	206	149	1	1	1.0,1.0,1.0,1.0,1.0,1.0,1.0,1.0	1.0,1.0,1.0,0.987,1.0	0.003	SE
[truncated: 9,069 more rows]
[truncated: 1 more columns]

## Sheet: C. Oscarella lobularis
ID	GeneID	geneSymbol	chr	strand	exonStart_0base	exonEnd	upstreamES	upstreamEE	downstreamES	downstreamEE	ID	IJC_SAMPLE_1	SJC_SAMPLE_1	IJC_SAMPLE_2	SJC_SAMPLE_2	IncFormLen	SkipFormLen	PValue	FDR	IncLevel1	IncLevel2	IncLevelDifference	Type_event_AS
[truncated: 1,722 more rows]

[truncated: 4 more sheets: D. Petrosia ficiformis, E. Phakellia ventilabrum, F. Axinella damicornis, G. Halichndria panicea]
