# Supplementary material for: Sponge genomes reveal a pre-metazoan origin of the sex determination toolkit and sex chromosomes
Source: Research Square preprint supplement (doi:10.21203/rs.3.rs-8554461/v1), 2026-02-12
Supplement: Supplementary file 11 [file 7cfc26f89f0109a72c118a6a.xlsx]

## Sheet: A. summary
Species	N Transcripts	N DEG	N DEG sexloci	Up in M	Up in F	% DEG	N genes w/sex loci	% DEG sexloci
Chondrosia reniformis	55034	1409	5	483	926	2.56024	352	1.42045
Oscarella lobularis	46974	183	0	110	73	0.389577	390	0
Petrosia ficiformis	46998	1147	60	823	324	2.44053	522	11.4943
Axinella damicornis	76993	52	0	31	21	0.0675386	199	0
Phakellia ventilabrum	68430	2478	8	326	2152	3.62122	359	2.22841
Halichondria panicea	41823	732	5	77	655	1.75023	73	6.84932
Geodia barretti	1048575	4560	4	3419	1142	0.434876	1357	0.294768
Geodia hentscheli	703073	1419	3	430	998	0.201828	1117	0.268577

## Sheet: B. Chondrosia reniformis
Transcript	sampleA	sampleB	logFC	logCPM	PValue	FDR	Sex-linked
Choren_v00_mik.OX359192.1G1110.1	Female	Male	-3.56534	3.99372	0.000558496	0.0228009	FEMALE
Choren_v00_mik.OX359193.1G1348.1	Female	Male	15.4671	4.87142	3.59351e-22	2.21594e-18	MALE
Choren_v00_mik.OX359193.1G1482.1	Female	Male	-10.9787	9.66688	2.63834e-05	0.00290524	MALE
Choren_v00_mik.OX359197.1G594.1	Female	Male	7.56229	9.40442	2.04844e-14	3.44501e-11	MALE
Choren_v00_mik.OX359197.1G793.1	Female	Male	-2.1673	6.44466	0.000888174	0.0308013	MALE
Choren_v00_mik.OX359199.1G1083.1	Female	Male	-12.8276	6.30197	6.30345e-09	3.64409e-06	MALE
Choren_v00_mik.OX359199.1G403.1	Female	Male	-5.72529	5.33081	4.78385e-07	0.000134094	MALE
Choren_v00_mik.OX359202.1G712.1	Female	Male	-4.23381	1.34274	0.00148797	0.0430779	MALE
Choren_v00_mik.OX359189.1G1031.1	Female	Male	4.65803	4.67571	9.66336e-08	3.68593e-05	NO
Choren_v00_mik.OX359189.1G109.1	Female	Male	-11.7747	6.8575	1.91394e-08	9.56945e-06	NO
Choren_v00_mik.OX359189.1G1139.1	Female	Male	-3.87899	5.51184	0.000130482	0.0083814	NO
Choren_v00_mik.OX359189.1G120.1	Female	Male	-6.76385	4.87301	2.93413e-05	0.00314666	NO
Choren_v00_mik.OX359189.1G1244.1	Female	Male	-8.48907	11.0796	9.87504e-10	6.76605e-07	NO
Choren_v00_mik.OX359189.1G1250.1	Female	Male	-3.43179	8.4358	0.000363283	0.0167595	NO
Choren_v00_mik.OX359189.1G1252.1	Female	Male	1.71432	5.94071	0.000977193	0.03269	NO
Choren_v00_mik.OX359189.1G1255.1	Female	Male	5.4354	6.74219	5.67572e-15	1.10524e-11	NO
Choren_v00_mik.OX359189.1G1255.2	Female	Male	5.37702	2.2218	0.000636301	0.0250986	NO
Choren_v00_mik.OX359189.1G126.1	Female	Male	-2.1026	6.53592	0.00108342	0.0350093	NO
Choren_v00_mik.OX359189.1G1269.1	Female	Male	-3.41855	7.10063	4.37994e-05	0.00402118	NO
Choren_v00_mik.OX359189.1G1271.1	Female	Male	-3.26847	7.49577	0.000263653	0.0135316	NO
Choren_v00_mik.OX359189.1G1272.1	Female	Male	-3.72604	4.58683	0.000196878	0.0111722	NO
Choren_v00_mik.OX359189.1G128.1	Female	Male	-6.38484	3.66827	7.20281e-07	0.000187674	NO
Choren_v00_mik.OX359189.1G1296.1	Female	Male	-9.16534	2.83452	0.000690526	0.0262847	NO
Choren_v00_mik.OX359189.1G1297.1	Female	Male	-7.50881	0.918421	0.00029201	0.0143863	NO
Choren_v00_mik.OX359189.1G132.1	Female	Male	-3.82054	4.98016	0.000148463	0.00904939	NO
Choren_v00_mik.OX359189.1G14.1	Female	Male	-5.04556	6.06656	6.91005e-06	0.00111644	NO
Choren_v00_mik.OX359189.1G1452.1	Female	Male	4.20303	2.57067	0.000564423	0.0228981	NO
Choren_v00_mik.OX359189.1G1454.1	Female	Male	4.21546	4.24218	0.000173548	0.0101439	NO
Choren_v00_mik.OX359189.1G1462.1	Female	Male	7.39525	3.58561	0.000402632	0.0180133	NO
Choren_v00_mik.OX359189.1G1541.1	Female	Male	-11.0012	0.425362	6.44195e-05	0.0052499	NO
Choren_v00_mik.OX359189.1G1676.1	Female	Male	9.83479	-0.710661	0.000236504	0.0126634	NO
Choren_v00_mik.OX359189.1G1690.1	Female	Male	-2.96364	6.84131	1.65175e-05	0.00205984	NO
Choren_v00_mik.OX359189.1G1696.1	Female	Male	-3.07631	4.30741	0.00167263	0.0461146	NO
Choren_v00_mik.OX359189.1G231.1	Female	Male	-1.94389	7.06656	0.000642106	0.0252201	NO
Choren_v00_mik.OX359189.1G235.1	Female	Male	-2.64226	6.57319	0.000295837	0.0145361	NO
Choren_v00_mik.OX359189.1G255.1	Female	Male	-4.34264	6.4515	0.00163909	0.0455632	NO
Choren_v00_mik.OX359189.1G30.1	Female	Male	11.322	0.743896	2.09501e-10	1.76167e-07	NO
Choren_v00_mik.OX359189.1G340.1	Female	Male	-5.16822	4.03843	3.78525e-05	0.00374466	NO
Choren_v00_mik.OX359189.1G349.1	Female	Male	-3.23541	6.14402	0.00106214	0.0346016	NO
Choren_v00_mik.OX359189.1G360.1	Female	Male	-4.32876	6.70262	0.000133644	0.00845243	NO
Choren_v00_mik.OX359189.1G414.1	Female	Male	-3.2061	8.07066	0.000271773	0.0137556	NO
Choren_v00_mik.OX359189.1G452.1	Female	Male	-3.57549	6.14653	0.000131438	0.00839765	NO
Choren_v00_mik.OX359189.1G473.1	Female	Male	5.75965	8.4372	1.88255e-05	0.00226881	NO
Choren_v00_mik.OX359189.1G475.1	Female	Male	13.9698	3.37593	0.00125243	0.0386058	NO
Choren_v00_mik.OX359189.1G488.1	Female	Male	-2.92955	5.5393	0.00149915	0.0431806	NO
Choren_v00_mik.OX359189.1G51.1	Female	Male	-2.88333	5.53885	0.000456094	0.0197369	NO
Choren_v00_mik.OX359189.1G527.1	Female	Male	-7.74165	9.85478	1.4191e-07	5.04859e-05	NO
Choren_v00_mik.OX359189.1G529.1	Female	Male	-8.74557	3.95707	0.00038222	0.0173263	NO
Choren_v00_mik.OX359189.1G578.1	Female	Male	-4.12088	5.29783	7.14559e-05	0.00564564	NO
Choren_v00_mik.OX359189.1G58.1	Female	Male	-2.44866	4.71883	0.000688608	0.0262658	NO
Choren_v00_mik.OX359189.1G611.1	Female	Male	-3.20686	8.79155	0.000384434	0.0173462	NO
Choren_v00_mik.OX359189.1G640.1	Female	Male	-3.3698	7.46522	8.79913e-05	0.00647235	NO
Choren_v00_mik.OX359189.1G74.1	Female	Male	-4.95032	7.55939	1.56163e-06	0.00035666	NO
Choren_v00_mik.OX359189.1G805.1	Female	Male	1.80004	8.65203	0.000872448	0.0305969	NO
Choren_v00_mik.OX359189.1G805.2	Female	Male	1.84888	5.72664	0.00071352	0.0268016	NO
Choren_v00_mik.OX359189.1G806.1	Female	Male	-2.69641	4.85766	0.00186916	0.0493595	NO
Choren_v00_mik.OX359189.1G86.1	Female	Male	-6.25358	6.65882	5.44661e-05	0.00465648	NO
Choren_v00_mik.OX359189.1G87.1	Female	Male	-4.3869	1.95678	0.000678707	0.0260415	NO
Choren_v00_mik.OX359189.1G887.1	Female	Male	-3.29658	4.8378	0.00183391	0.048815	NO
Choren_v00_mik.OX359189.1G977.1	Female	Male	6.46916	-0.231229	0.000248764	0.0130184	NO
Choren_v00_mik.OX359190.1G1057.1	Female	Male	-7.36226	6.19275	0.00159838	0.0448357	NO
Choren_v00_mik.OX359190.1G1089.1	Female	Male	4.22612	3.24222	0.0001449	0.00887608	NO
Choren_v00_mik.OX359190.1G1124.1	Female	Male	-3.47278	6.23385	0.00171531	0.0467683	NO
Choren_v00_mik.OX359190.1G1193.1	Female	Male	-5.25211	7.75302	2.03147e-06	0.000442131	NO
Choren_v00_mik.OX359190.1G1204.1	Female	Male	-3.86032	5.78833	0.000217638	0.0118975	NO
Choren_v00_mik.OX359190.1G1240.1	Female	Male	-2.49983	4.5454	0.00115948	0.0366662	NO
Choren_v00_mik.OX359190.1G1257.1	Female	Male	3.74508	7.20149	1.50278e-09	9.4433e-07	NO
Choren_v00_mik.OX359190.1G1259.1	Female	Male	7.38941	3.40197	9.86816e-05	0.00694129	NO
Choren_v00_mik.OX359190.1G1260.1	Female	Male	6.25861	4.77306	1.80602e-13	2.7842e-10	NO
Choren_v00_mik.OX359190.1G1262.2	Female	Male	3.63504	3.43093	0.00105706	0.0345191	NO
Choren_v00_mik.OX359190.1G1265.1	Female	Male	11.7769	2.92635	1.67679e-05	0.00206798	NO
Choren_v00_mik.OX359190.1G1334.1	Female	Male	-2.44859	6.28168	0.000384439	0.0173462	NO
Choren_v00_mik.OX359190.1G1343.1	Female	Male	-16.093	5.49685	8.53793e-06	0.00131623	NO
Choren_v00_mik.OX359190.1G1345.2	Female	Male	-3.15987	4.70525	0.0017261	0.0469588	NO
Choren_v00_mik.OX359190.1G136.1	Female	Male	-3.46789	5.64589	0.000215959	0.0118726	NO
Choren_v00_mik.OX359190.1G1371.1	Female	Male	-3.71788	5.24182	0.000131642	0.00839765	NO
Choren_v00_mik.OX359190.1G1371.2	Female	Male	-4.01286	6.3615	3.98762e-05	0.00384214	NO
Choren_v00_mik.OX359190.1G1372.1	Female	Male	3.13275	2.55814	0.000131941	0.00840219	NO
Choren_v00_mik.OX359190.1G1375.1	Female	Male	-2.74886	7.06325	0.000729799	0.0272471	NO
Choren_v00_mik.OX359190.1G1401.1	Female	Male	-3.56886	6.13568	8.36144e-05	0.00623719	NO
Choren_v00_mik.OX359190.1G1450.1	Female	Male	-12.625	2.03541	0.000689416	0.0262695	NO
Choren_v00_mik.OX359190.1G1454.1	Female	Male	-3.21098	4.45934	1.20857e-05	0.00166388	NO
Choren_v00_mik.OX359190.1G1462.1	Female	Male	-4.03512	5.29519	0.000149458	0.00909509	NO
Choren_v00_mik.OX359190.1G176.1	Female	Male	-3.41336	7.85279	4.46525e-05	0.0040692	NO
Choren_v00_mik.OX359190.1G184.2	Female	Male	9.89566	-0.651806	0.000107322	0.0073944	NO
Choren_v00_mik.OX359190.1G20.1	Female	Male	2.24364	8.62999	1.75761e-05	0.0021462	NO
Choren_v00_mik.OX359190.1G22.1	Female	Male	-4.09949	3.98748	0.000958381	0.032371	NO
Choren_v00_mik.OX359190.1G262.1	Female	Male	-2.86002	5.88117	0.00163848	0.0455632	NO
Choren_v00_mik.OX359190.1G265.1	Female	Male	-3.16244	6.86292	1.5572e-05	0.0019799	NO
Choren_v00_mik.OX359190.1G446.1	Female	Male	-3.56929	6.72548	0.00085672	0.0303328	NO
Choren_v00_mik.OX359190.1G526.1	Female	Male	-5.80647	0.834209	0.000360779	0.0166856	NO
Choren_v00_mik.OX359190.1G903.1	Female	Male	-3.54035	6.08115	0.000762165	0.0281431	NO
Choren_v00_mik.OX359190.1G903.2	Female	Male	-3.42126	6.2598	0.000599241	0.0238658	NO
Choren_v00_mik.OX359190.1G949.1	Female	Male	-4.93136	7.25337	4.80895e-05	0.00425661	NO
Choren_v00_mik.OX359190.1G949.2	Female	Male	-5.24621	0.587459	0.000711801	0.0268016	NO
Choren_v00_mik.OX359191.1G1008.1	Female	Male	-4.45311	7.75998	0.000128325	0.00830055	NO
Choren_v00_mik.OX359191.1G1051.1	Female	Male	4.08513	5.29305	8.33379e-07	0.000208339	NO
Choren_v00_mik.OX359191.1G1053.2	Female	Male	11.7134	1.1312	2.38183e-05	0.00269497	NO
Choren_v00_mik.OX359191.1G1057.1	Female	Male	1.91715	6.57379	0.000427873	0.0188015	NO
Choren_v00_mik.OX359191.1G1059.1	Female	Male	-6.87833	6.36211	0.000142921	0.00880285	NO
Choren_v00_mik.OX359191.1G1119.4	Female	Male	-2.81049	2.63973	0.00186676	0.0493412	NO
Choren_v00_mik.OX359191.1G1129.1	Female	Male	-3.1946	6.84235	0.000529289	0.022078	NO
Choren_v00_mik.OX359191.1G1138.1	Female	Male	-5.96252	0.957448	0.000950847	0.0322756	NO
Choren_v00_mik.OX359191.1G1191.1	Female	Male	-3.36422	-0.230957	0.000667075	0.0258441	NO
Choren_v00_mik.OX359191.1G1196.2	Female	Male	9.32826	-1.19586	0.000954608	0.032371	NO
Choren_v00_mik.OX359191.1G1204.1	Female	Male	-3.11497	5.61251	0.000148062	0.00903986	NO
Choren_v00_mik.OX359191.1G1219.1	Female	Male	-5.06002	8.3593	1.48806e-05	0.00191169	NO
Choren_v00_mik.OX359191.1G1241.1	Female	Male	-3.07039	5.13792	0.000880873	0.0306887	NO
Choren_v00_mik.OX359191.1G125.1	Female	Male	-2.79238	4.53623	0.0010829	0.0350093	NO
Choren_v00_mik.OX359191.1G1274.1	Female	Male	-3.52258	7.16927	0.00143443	0.0421879	NO
Choren_v00_mik.OX359191.1G180.1	Female	Male	3.57505	5.02379	2.78114e-07	8.43438e-05	NO
Choren_v00_mik.OX359191.1G181.1	Female	Male	5.13979	6.02109	3.93339e-10	3.16373e-07	NO
Choren_v00_mik.OX359191.1G183.1	Female	Male	-2.95751	8.26792	0.00148618	0.0430779	NO
Choren_v00_mik.OX359191.1G44.1	Female	Male	-6.73431	7.9221	2.56883e-07	8.05458e-05	NO
Choren_v00_mik.OX359191.1G567.1	Female	Male	-7.18446	-0.280359	3.61193e-05	0.00359242	NO
Choren_v00_mik.OX359191.1G61.1	Female	Male	4.69248	8.69691	2.98169e-06	0.000599562	NO
Choren_v00_mik.OX359191.1G62.1	Female	Male	4.38899	10.2463	5.51268e-05	0.00469963	NO
Choren_v00_mik.OX359191.1G640.1	Female	Male	-2.28694	6.83029	0.00117017	0.0368783	NO
Choren_v00_mik.OX359191.1G656.1	Female	Male	-2.18571	5.78667	0.00129296	0.0394705	NO
Choren_v00_mik.OX359191.1G675.1	Female	Male	5.96479	8.62957	2.0082e-06	0.000439653	NO
Choren_v00_mik.OX359191.1G686.1	Female	Male	3.34568	4.88666	0.000279944	0.013978	NO
Choren_v00_mik.OX359191.1G75.1	Female	Male	-3.36183	5.80723	0.000858759	0.0303693	NO
Choren_v00_mik.OX359191.1G756.1	Female	Male	-2.42824	6.04808	0.000936996	0.0318639	NO
Choren_v00_mik.OX359191.1G781.1	Female	Male	-2.59295	5.2845	0.00177051	0.0476069	NO
Choren_v00_mik.OX359191.1G794.1	Female	Male	-4.27665	6.50812	0.000195786	0.0111444	NO
Choren_v00_mik.OX359191.1G803.1	Female	Male	-4.09948	6.95974	5.33137e-05	0.00459802	NO
Choren_v00_mik.OX359191.1G861.1	Female	Male	-3.1125	7.22282	9.56558e-05	0.00683021	NO
Choren_v00_mik.OX359191.1G864.1	Female	Male	-4.1164	7.41581	4.53889e-06	0.000835494	NO
Choren_v00_mik.OX359191.1G906.1	Female	Male	3.70557	2.92274	3.96698e-05	0.00383223	NO
Choren_v00_mik.OX359191.1G914.1	Female	Male	-5.94515	7.41646	4.78043e-06	0.00085445	NO
Choren_v00_mik.OX359191.1G917.1	Female	Male	-4.8952	9.79495	2.47814e-05	0.00277006	NO
Choren_v00_mik.OX359191.1G987.1	Female	Male	-5.36338	4.47414	1.35603e-05	0.00179685	NO
Choren_v00_mik.OX359191.1G992.1	Female	Male	10.2219	5.51805	2.42618e-25	2.24415e-21	NO
Choren_v00_mik.OX359192.1G1010.1	Female	Male	-13.114	2.52189	6.79446e-06	0.00110473	NO
Choren_v00_mik.OX359192.1G1042.1	Female	Male	-3.98255	8.92101	0.000174198	0.0101659	NO
Choren_v00_mik.OX359192.1G1043.1	Female	Male	-2.80707	7.90205	0.00078736	0.0286901	NO
Choren_v00_mik.OX359192.1G1057.1	Female	Male	-8.3392	2.35648	2.42371e-06	0.000508066	NO
Choren_v00_mik.OX359192.1G1109.1	Female	Male	-4.84493	10.3534	4.87199e-06	0.00086436	NO
Choren_v00_mik.OX359192.1G1109.2	Female	Male	-5.99551	9.23898	0.000725675	0.0271753	NO
Choren_v00_mik.OX359192.1G1117.1	Female	Male	-3.56296	7.67485	4.0179e-05	0.0038434	NO
Choren_v00_mik.OX359192.1G1119.1	Female	Male	3.05684	2.94568	0.000204371	0.0113707	NO
Choren_v00_mik.OX359192.1G1149.1	Female	Male	-7.1339	6.32793	2.05306e-05	0.00241915	NO
Choren_v00_mik.OX359192.1G1160.1	Female	Male	7.17577	4.91923	5.48201e-08	2.27898e-05	NO
Choren_v00_mik.OX359192.1G1175.1	Female	Male	-1.81676	6.28507	0.000673367	0.0260333	NO
Choren_v00_mik.OX359192.1G1202.1	Female	Male	-5.437	1.41934	7.43298e-05	0.00580196	NO
Choren_v00_mik.OX359192.1G1203.1	Female	Male	-6.34152	2.84449	1.35695e-05	0.00179685	NO
Choren_v00_mik.OX359192.1G1210.1	Female	Male	-3.37814	8.4091	7.65044e-05	0.00588142	NO
Choren_v00_mik.OX359192.1G1231.1	Female	Male	-3.48867	2.31826	3.44718e-05	0.00346582	NO
Choren_v00_mik.OX359192.1G1244.1	Female	Male	-5.83529	0.139378	0.00155246	0.0438424	NO
Choren_v00_mik.OX359192.1G1254.3	Female	Male	2.25227	6.96584	0.00127254	0.0390671	NO
Choren_v00_mik.OX359192.1G1278.1	Female	Male	-7.3037	6.54554	0.000290672	0.0143863	NO
Choren_v00_mik.OX359192.1G1280.1	Female	Male	-7.57882	3.87906	0.00115642	0.0366323	NO
Choren_v00_mik.OX359192.1G1336.1	Female	Male	-8.62924	1.32281	0.000809548	0.0291162	NO
Choren_v00_mik.OX359192.1G1337.1	Female	Male	-3.30215	5.18605	0.000489147	0.0207783	NO
Choren_v00_mik.OX359192.1G1342.1	Female	Male	-10.807	8.62237	1.10116e-06	0.000266287	NO
Choren_v00_mik.OX359192.1G1353.2	Female	Male	10.8581	0.287433	4.45813e-05	0.0040692	NO
Choren_v00_mik.OX359192.1G1356.1	Female	Male	2.13033	5.55562	0.00189464	0.0497867	NO
Choren_v00_mik.OX359192.1G1357.1	Female	Male	-3.87547	3.50993	9.99683e-05	0.00701846	NO
Choren_v00_mik.OX359192.1G1359.1	Female	Male	-2.60097	5.94611	0.00114362	0.0364088	NO
Choren_v00_mik.OX359192.1G1373.1	Female	Male	-3.54072	7.47828	0.000136937	0.00857963	NO
Choren_v00_mik.OX359192.1G1399.1	Female	Male	-4.738	2.12748	0.000112064	0.00755237	NO
Choren_v00_mik.OX359192.1G15.1	Female	Male	-4.44678	5.95264	2.28461e-05	0.00261698	NO
Choren_v00_mik.OX359192.1G15.2	Female	Male	-3.53841	6.05612	0.000451413	0.0196031	NO
Choren_v00_mik.OX359192.1G158.2	Female	Male	-3.18167	7.00467	0.00162893	0.0453831	NO
Choren_v00_mik.OX359192.1G171.4	Female	Male	9.9477	-0.599164	0.000871121	0.0305793	NO
Choren_v00_mik.OX359192.1G216.1	Female	Male	-4.07293	7.00348	7.98124e-05	0.00601421	NO
Choren_v00_mik.OX359192.1G218.2	Female	Male	-4.00652	3.5392	0.00179221	0.0479117	NO
Choren_v00_mik.OX359192.1G241.1	Female	Male	-2.39398	4.8704	0.000534648	0.0222275	NO
Choren_v00_mik.OX359192.1G319.1	Female	Male	1.481	7.8926	0.000885656	0.0307688	NO
Choren_v00_mik.OX359192.1G329.1	Female	Male	-2.07959	5.35348	0.000313364	0.0150574	NO
Choren_v00_mik.OX359192.1G357.1	Female	Male	-8.26593	10.6048	3.73603e-07	0.000110584	NO
Choren_v00_mik.OX359192.1G367.1	Female	Male	-3.13726	4.98187	0.000177182	0.0103075	NO
Choren_v00_mik.OX359192.1G390.1	Female	Male	3.37825	4.1695	1.44503e-05	0.00188256	NO
Choren_v00_mik.OX359192.1G430.1	Female	Male	5.7862	4.80907	7.96691e-07	0.000202183	NO
Choren_v00_mik.OX359192.1G437.1	Female	Male	-7.67022	8.09318	5.19846e-06	0.000902994	NO
Choren_v00_mik.OX359192.1G55.1	Female	Male	-5.58877	6.06963	9.39922e-06	0.00140794	NO
Choren_v00_mik.OX359192.1G612.1	Female	Male	-4.67053	5.75606	7.84237e-05	0.00594118	NO
Choren_v00_mik.OX359192.1G627.1	Female	Male	-3.73254	3.1722	0.000378554	0.0172092	NO
Choren_v00_mik.OX359192.1G638.1	Female	Male	-3.72708	6.05036	1.58973e-05	0.00201377	NO
Choren_v00_mik.OX359192.1G650.1	Female	Male	-3.13138	5.90167	0.000392601	0.0176479	NO
Choren_v00_mik.OX359192.1G656.1	Female	Male	-4.37902	6.0068	0.000378582	0.0172092	NO
Choren_v00_mik.OX359192.1G669.1	Female	Male	-4.2277	7.42632	5.44949e-05	0.00465648	NO
Choren_v00_mik.OX359192.1G676.1	Female	Male	-4.0989	6.75372	5.02069e-05	0.00442287	NO
Choren_v00_mik.OX359192.1G677.1	Female	Male	-4.14411	5.67442	3.79684e-05	0.00374611	NO
Choren_v00_mik.OX359192.1G686.1	Female	Male	-3.16654	4.93911	0.00102727	0.0338451	NO
Choren_v00_mik.OX359192.1G698.2	Female	Male	-3.64706	4.0935	0.00128799	0.0394163	NO
Choren_v00_mik.OX359192.1G7.1	Female	Male	-2.96101	6.62716	2.34949e-05	0.00267473	NO
Choren_v00_mik.OX359192.1G71.3	Female	Male	3.25714	3.46677	0.00079928	0.0290161	NO
Choren_v00_mik.OX359192.1G714.1	Female	Male	-2.54441	6.12367	0.00165204	0.0457393	NO
Choren_v00_mik.OX359192.1G724.1	Female	Male	-7.07976	0.185052	0.000382546	0.0173263	NO
Choren_v00_mik.OX359192.1G745.1	Female	Male	-3.47628	5.1248	0.000169254	0.00998758	NO
Choren_v00_mik.OX359192.1G757.1	Female	Male	-7.27961	3.81192	0.000525138	0.0219543	NO
Choren_v00_mik.OX359192.1G768.1	Female	Male	-11.5766	0.99389	4.68702e-05	0.00417342	NO
Choren_v00_mik.OX359192.1G772.1	Female	Male	-5.07978	5.67986	2.07688e-05	0.00243945	NO
Choren_v00_mik.OX359192.1G777.1	Female	Male	-3.27657	2.0558	0.00164592	0.0456845	NO
Choren_v00_mik.OX359192.1G780.1	Female	Male	5.68287	10.4732	2.05508e-22	1.52072e-18	NO
Choren_v00_mik.OX359192.1G790.1	Female	Male	-4.78356	4.31612	0.000770066	0.0282655	NO
Choren_v00_mik.OX359192.1G793.1	Female	Male	11.1269	0.551236	0.000393035	0.0176479	NO
Choren_v00_mik.OX359192.1G846.1	Female	Male	-3.54549	7.88925	7.82471e-05	0.00594118	NO
Choren_v00_mik.OX359192.1G950.1	Female	Male	-2.90903	5.72681	0.000162762	0.00971297	NO
Choren_v00_mik.OX359192.1G951.1	Female	Male	-7.01549	3.36607	1.1549e-05	0.00162472	NO
Choren_v00_mik.OX359192.1G953.1	Female	Male	1.66909	4.70481	0.00159993	0.0448453	NO
Choren_v00_mik.OX359192.1G964.1	Female	Male	-3.14137	2.8704	0.000570583	0.0230469	NO
Choren_v00_mik.OX359192.1G986.1	Female	Male	-2.74091	8.08098	0.000224377	0.0121548	NO
Choren_v00_mik.OX359193.1G101.1	Female	Male	-3.39593	6.44866	0.000808573	0.0291162	NO
Choren_v00_mik.OX359193.1G1012.1	Female	Male	-15.3616	8.42017	3.5991e-12	4.03524e-09	NO
Choren_v00_mik.OX359193.1G1057.1	Female	Male	2.18956	6.29683	1.16351e-05	0.00163064	NO
Choren_v00_mik.OX359193.1G1059.1	Female	Male	-5.9675	3.18035	4.79396e-07	0.000134094	NO
Choren_v00_mik.OX359193.1G106.1	Female	Male	-7.27758	3.36574	3.55362e-06	0.00068547	NO
Choren_v00_mik.OX359193.1G1060.1	Female	Male	10.0466	4.02669	7.73571e-18	2.38511e-14	NO
Choren_v00_mik.OX359193.1G1061.1	Female	Male	-4.19264	9.7047	4.02739e-05	0.0038434	NO
Choren_v00_mik.OX359193.1G1112.1	Female	Male	-4.14018	3.23519	0.00145774	0.0427236	NO
Choren_v00_mik.OX359193.1G1112.2	Female	Male	-4.53515	3.29163	0.0011621	0.0367177	NO
Choren_v00_mik.OX359193.1G1121.1	Female	Male	2.16204	7.99082	0.000244757	0.0128975	NO
Choren_v00_mik.OX359193.1G113.1	Female	Male	-2.66238	4.48621	0.00143132	0.0421531	NO
Choren_v00_mik.OX359193.1G1140.1	Female	Male	2.09368	5.53725	6.86568e-05	0.00549834	NO
Choren_v00_mik.OX359193.1G1143.1	Female	Male	-2.97056	6.28062	0.000683945	0.0261407	NO
Choren_v00_mik.OX359193.1G1151.1	Female	Male	-2.54266	4.50551	0.000503965	0.0212613	NO
Choren_v00_mik.OX359193.1G1159.1	Female	Male	-5.78877	0.828769	0.00133803	0.0401832	NO
Choren_v00_mik.OX359193.1G1166.1	Female	Male	-2.32031	5.0224	0.00156946	0.0441249	NO
Choren_v00_mik.OX359193.1G1175.1	Female	Male	-3.50163	7.23748	4.53144e-05	0.00411938	NO
Choren_v00_mik.OX359193.1G1179.1	Female	Male	-4.17648	2.49902	0.000497326	0.0210292	NO
Choren_v00_mik.OX359193.1G1185.1	Female	Male	1.81045	4.85673	0.000610791	0.0242735	NO
Choren_v00_mik.OX359193.1G1208.1	Female	Male	-2.53602	8.3317	0.000963804	0.0323901	NO
Choren_v00_mik.OX359193.1G121.1	Female	Male	-1.95139	5.18807	0.00130904	0.039797	NO
Choren_v00_mik.OX359193.1G1211.1	Female	Male	-4.09383	3.97765	0.00150265	0.0431806	NO
Choren_v00_mik.OX359193.1G1235.1	Female	Male	-3.43118	1.63756	3.46604e-05	0.00347534	NO
Choren_v00_mik.OX359193.1G1241.1	Female	Male	-12.0711	8.91923	6.5165e-08	2.67893e-05	NO
Choren_v00_mik.OX359193.1G1256.1	Female	Male	6.83355	2.31011	2.79744e-09	1.69676e-06	NO
Choren_v00_mik.OX359193.1G1270.1	Female	Male	-11.5635	0.980857	3.89705e-05	0.00377916	NO
Choren_v00_mik.OX359193.1G1276.1	Female	Male	6.22088	5.86497	5.59385e-13	7.96027e-10	NO
Choren_v00_mik.OX359193.1G1298.1	Female	Male	7.71193	1.81305	5.15165e-06	0.000899084	NO
Choren_v00_mik.OX359193.1G1322.1	Female	Male	6.27369	3.55458	1.19233e-06	0.000282789	NO
Choren_v00_mik.OX359193.1G138.1	Female	Male	-7.09755	8.07193	1.16097e-09	7.80992e-07	NO
Choren_v00_mik.OX359193.1G1381.1	Female	Male	-3.07058	7.30722	0.000359934	0.0166827	NO
Choren_v00_mik.OX359193.1G1381.2	Female	Male	-4.37372	4.11185	0.000783965	0.0286055	NO
Choren_v00_mik.OX359193.1G1391.1	Female	Male	5.33132	7.37619	2.57332e-06	0.000534888	NO
Choren_v00_mik.OX359193.1G1411.1	Female	Male	-4.11003	-0.419867	0.000751077	0.0278169	NO
Choren_v00_mik.OX359193.1G1417.1	Female	Male	-3.84278	6.77455	0.000120823	0.0079827	NO
Choren_v00_mik.OX359193.1G1424.1	Female	Male	-3.21789	7.53607	0.000178746	0.0103496	NO
Choren_v00_mik.OX359193.1G1425.1	Female	Male	6.06536	5.99672	1.25871e-12	1.55237e-09	NO
Choren_v00_mik.OX359193.1G1431.1	Female	Male	-4.0791	8.74241	6.00712e-05	0.00500311	NO
Choren_v00_mik.OX359193.1G1456.1	Female	Male	-4.28764	3.45141	0.000968287	0.0324508	NO
Choren_v00_mik.OX359193.1G146.1	Female	Male	-3.56919	5.20419	4.35238e-05	0.00400581	NO
Choren_v00_mik.OX359193.1G1462.1	Female	Male	2.9611	6.59075	5.17592e-05	0.00450831	NO
Choren_v00_mik.OX359193.1G1477.1	Female	Male	-5.9282	3.5408	0.000524457	0.0219507	NO
Choren_v00_mik.OX359193.1G1486.1	Female	Male	-2.86801	4.23425	0.000998255	0.0331861	NO
Choren_v00_mik.OX359193.1G172.1	Female	Male	-9.8292	-0.722069	0.000160293	0.00958104	NO
Choren_v00_mik.OX359193.1G179.1	Female	Male	2.04384	5.28663	0.000964587	0.0323901	NO
Choren_v00_mik.OX359193.1G182.1	Female	Male	-4.04295	7.68335	3.87377e-05	0.00377916	NO
Choren_v00_mik.OX359193.1G194.1	Female	Male	-4.32034	4.53356	0.000789879	0.0287362	NO
Choren_v00_mik.OX359193.1G204.1	Female	Male	3.80598	3.54153	2.09628e-05	0.00245444	NO
Choren_v00_mik.OX359193.1G268.1	Female	Male	1.832	6.11086	0.00032704	0.0154931	NO
Choren_v00_mik.OX359193.1G290.1	Female	Male	-3.8658	6.32499	6.74554e-05	0.00542562	NO
Choren_v00_mik.OX359193.1G296.1	Female	Male	-2.20413	7.34631	3.32963e-05	0.00340337	NO
Choren_v00_mik.OX359193.1G301.1	Female	Male	-3.97761	7.85344	5.20297e-05	0.00450831	NO
Choren_v00_mik.OX359193.1G38.1	Female	Male	-7.75804	6.54807	1.60355e-07	5.54483e-05	NO
Choren_v00_mik.OX359193.1G442.1	Female	Male	-8.4935	1.99915	5.59415e-05	0.00475811	NO
Choren_v00_mik.OX359193.1G480.2	Female	Male	-3.32543	4.78546	0.000339536	0.015922	NO
Choren_v00_mik.OX359193.1G482.1	Female	Male	-4.79626	7.9914	1.34001e-05	0.00179685	NO
Choren_v00_mik.OX359193.1G773.2	Female	Male	9.41216	-1.11512	0.000142991	0.00880285	NO
Choren_v00_mik.OX359193.1G773.3	Female	Male	9.77422	-0.768759	0.000127856	0.00828468	NO
Choren_v00_mik.OX359193.1G793.1	Female	Male	-6.62291	2.69564	0.00012162	0.00802106	NO
Choren_v00_mik.OX359193.1G80.1	Female	Male	-6.72167	5.2497	4.23472e-06	0.000791315	NO
Choren_v00_mik.OX359193.1G80.2	Female	Male	-6.77668	5.61104	3.36376e-06	0.00065503	NO
Choren_v00_mik.OX359193.1G830.1	Female	Male	-2.71651	6.04813	0.00148166	0.0430634	NO
Choren_v00_mik.OX359193.1G855.1	Female	Male	4.03769	5.62469	1.50626e-08	7.63429e-06	NO
Choren_v00_mik.OX359193.1G894.1	Female	Male	-2.69291	2.31138	0.00174991	0.0473896	NO
Choren_v00_mik.OX359193.1G922.1	Female	Male	-3.15912	6.25113	0.000864034	0.0304751	NO
Choren_v00_mik.OX359193.1G975.1	Female	Male	1.51147	8.55388	0.00183852	0.0488869	NO
Choren_v00_mik.OX359194.1G1047.1	Female	Male	-7.704	5.51096	6.44888e-07	0.000171656	NO
Choren_v00_mik.OX359194.1G1050.1	Female	Male	4.18397	3.1986	0.00132789	0.0400693	NO
Choren_v00_mik.OX359194.1G1093.1	Female	Male	-3.46211	6.56287	0.00128206	0.0392674	NO
Choren_v00_mik.OX359194.1G11.1	Female	Male	-3.46986	5.42458	1.79298e-05	0.00216824	NO
Choren_v00_mik.OX359194.1G11.2	Female	Male	-3.03196	5.37062	3.31082e-05	0.00340269	NO
Choren_v00_mik.OX359194.1G1104.1	Female	Male	13.4672	2.87462	9.70635e-06	0.0014365	NO
Choren_v00_mik.OX359194.1G1107.1	Female	Male	9.61109	-0.925702	1.66859e-07	5.66385e-05	NO
Choren_v00_mik.OX359194.1G1119.1	Female	Male	3.01023	2.69314	0.000437754	0.0191221	NO
Choren_v00_mik.OX359194.1G1129.1	Female	Male	-7.35889	3.71327	0.000417391	0.0184888	NO
Choren_v00_mik.OX359194.1G1131.1	Female	Male	-2.88604	9.06832	0.000551171	0.0225584	NO
Choren_v00_mik.OX359194.1G1136.1	Female	Male	-3.94798	7.81603	8.83843e-05	0.00648562	NO
Choren_v00_mik.OX359194.1G1156.1	Female	Male	-2.68334	7.61005	0.000185122	0.0106521	NO
Choren_v00_mik.OX359194.1G170.1	Female	Male	3.95637	6.29638	6.19195e-11	5.7274e-08	NO
Choren_v00_mik.OX359194.1G170.2	Female	Male	11.4735	2.52038	7.81629e-11	7.05353e-08	NO
Choren_v00_mik.OX359194.1G221.1	Female	Male	8.20223	13.6619	2.3586e-12	2.81503e-09	NO
Choren_v00_mik.OX359194.1G325.1	Female	Male	-5.16635	5.6618	1.31825e-05	0.0017866	NO
Choren_v00_mik.OX359194.1G325.2	Female	Male	-6.24231	7.06137	1.33053e-05	0.00179666	NO
Choren_v00_mik.OX359194.1G353.1	Female	Male	1.88355	6.2283	0.000847033	0.0301051	NO
Choren_v00_mik.OX359194.1G420.2	Female	Male	1.97537	4.05725	0.00112102	0.0358929	NO
Choren_v00_mik.OX359194.1G5.1	Female	Male	-5.23857	9.56974	0.000481036	0.0205518	NO
Choren_v00_mik.OX359194.1G571.1	Female	Male	5.39386	4.69663	1.06363e-11	1.09314e-08	NO
Choren_v00_mik.OX359194.1G596.1	Female	Male	-3.1942	1.74779	0.00155349	0.0438424	NO
Choren_v00_mik.OX359194.1G626.1	Female	Male	3.2488	-0.644494	0.00178022	0.047764	NO
Choren_v00_mik.OX359194.1G627.1	Female	Male	-5.40828	7.22416	0.000167703	0.00994364	NO
Choren_v00_mik.OX359194.1G673.1	Female	Male	-2.78325	7.88999	0.000443201	0.0193372	NO
Choren_v00_mik.OX359194.1G679.1	Female	Male	-4.15925	8.82655	1.96111e-05	0.00234442	NO
Choren_v00_mik.OX359194.1G695.1	Female	Male	2.51389	11.3843	9.79294e-07	0.000241553	NO
Choren_v00_mik.OX359194.1G710.2	Female	Male	9.63178	-0.906388	0.000257635	0.0133318	NO
Choren_v00_mik.OX359194.1G717.3	Female	Male	2.62003	4.68877	5.79107e-05	0.00489187	NO
Choren_v00_mik.OX359194.1G730.1	Female	Male	-4.51274	7.48935	9.6666e-05	0.00687797	NO
Choren_v00_mik.OX359194.1G735.1	Female	Male	-2.37122	6.13026	0.000542057	0.02234	NO
Choren_v00_mik.OX359194.1G740.1	Female	Male	-4.54088	5.85633	0.00112144	0.0358929	NO
Choren_v00_mik.OX359194.1G781.1	Female	Male	-3.04648	5.11111	0.000197715	0.0111854	NO
Choren_v00_mik.OX359194.1G79.1	Female	Male	3.3072	3.0823	0.000486958	0.0207212	NO
Choren_v00_mik.OX359194.1G797.1	Female	Male	-4.81451	5.71941	1.39212e-06	0.000323945	NO
Choren_v00_mik.OX359194.1G797.2	Female	Male	-4.41127	2.68675	0.000272948	0.0137586	NO
Choren_v00_mik.OX359194.1G824.1	Female	Male	-4.03111	6.61494	0.000140798	0.00872595	NO
Choren_v00_mik.OX359194.1G826.1	Female	Male	3.9121	3.95255	2.9929e-08	1.33415e-05	NO
Choren_v00_mik.OX359194.1G862.1	Female	Male	-3.14591	8.23684	0.000304226	0.0147816	NO
Choren_v00_mik.OX359194.1G878.1	Female	Male	-2.84263	4.52225	0.000480463	0.020551	NO
Choren_v00_mik.OX359194.1G888.1	Female	Male	2.11513	5.694	0.000320308	0.0152596	NO
Choren_v00_mik.OX359194.1G904.1	Female	Male	-10.87	0.297044	0.00135801	0.0406185	NO
Choren_v00_mik.OX359194.1G926.1	Female	Male	1.55635	9.76644	0.00038775	0.0174743	NO
Choren_v00_mik.OX359194.1G929.1	Female	Male	-7.32203	5.99967	2.07434e-06	0.000448822	NO
Choren_v00_mik.OX359194.1G931.1	Female	Male	-4.54806	7.72802	2.2109e-05	0.00254832	NO
Choren_v00_mik.OX359194.1G944.1	Female	Male	-3.65168	4.13369	4.58195e-05	0.00415508	NO
Choren_v00_mik.OX359194.1G953.1	Female	Male	-3.19191	3.40348	0.000734625	0.0273702	NO
Choren_v00_mik.OX359194.1G962.1	Female	Male	3.27392	5.40071	5.18903e-05	0.00450831	NO
Choren_v00_mik.OX359194.1G982.1	Female	Male	-2.45095	4.74801	0.00152151	0.0435379	NO
Choren_v00_mik.OX359194.1G999.1	Female	Male	-3.23456	6.40379	0.000542817	0.02234	NO
Choren_v00_mik.OX359195.1G1046.1	Female	Male	-3.32849	7.81798	4.20237e-05	0.00393119	NO
Choren_v00_mik.OX359195.1G106.1	Female	Male	2.74871	4.94475	2.96133e-05	0.00316666	NO
Choren_v00_mik.OX359195.1G1072.3	Female	Male	-3.44139	4.63759	0.00084987	0.030148	NO
Choren_v00_mik.OX359195.1G1073.1	Female	Male	-9.21552	8.52395	1.74822e-05	0.0021418	NO
Choren_v00_mik.OX359195.1G1077.1	Female	Male	3.8868	6.16771	5.49537e-07	0.00015061	NO
Choren_v00_mik.OX359195.1G1081.1	Female	Male	2.27563	4.84912	0.000169959	0.0100132	NO
Choren_v00_mik.OX359195.1G1109.1	Female	Male	-3.17534	5.97867	0.000933925	0.0318462	NO
Choren_v00_mik.OX359195.1G1131.1	Female	Male	-3.02381	7.36964	0.000544371	0.0223791	NO
Choren_v00_mik.OX359195.1G1210.1	Female	Male	3.83379	4.38112	0.000803602	0.0290924	NO
Choren_v00_mik.OX359195.1G1212.1	Female	Male	-3.89738	7.00398	6.24547e-05	0.00513502	NO
Choren_v00_mik.OX359195.1G1280.1	Female	Male	-4.6488	6.9327	1.19984e-05	0.00166388	NO
Choren_v00_mik.OX359195.1G14.1	Female	Male	-3.84867	5.16343	3.51909e-05	0.003519	NO
Choren_v00_mik.OX359195.1G234.1	Female	Male	4.98054	6.28357	1.63321e-06	0.000369804	NO
Choren_v00_mik.OX359195.1G294.2	Female	Male	-3.86366	2.0545	0.000596442	0.0238056	NO
Choren_v00_mik.OX359195.1G3.1	Female	Male	1.88975	8.72893	0.000130795	0.00838698	NO
Choren_v00_mik.OX359195.1G333.1	Female	Male	8.78263	-1.70691	0.000816601	0.029305	NO
Choren_v00_mik.OX359195.1G429.1	Female	Male	-3.36654	6.24052	0.000447198	0.0194657	NO
Choren_v00_mik.OX359195.1G642.1	Female	Male	12.5689	1.98009	1.47281e-05	0.0018987	NO
Choren_v00_mik.OX359195.1G664.1	Female	Male	-6.13561	6.84222	8.64856e-10	6.09272e-07	NO
Choren_v00_mik.OX359195.1G665.1	Female	Male	2.75255	5.92188	2.87751e-07	8.6557e-05	NO
Choren_v00_mik.OX359195.1G71.1	Female	Male	-7.46026	10.1438	1.20418e-09	7.95596e-07	NO
Choren_v00_mik.OX359195.1G728.2	Female	Male	1.79726	6.74364	0.000377691	0.0172092	NO
Choren_v00_mik.OX359195.1G843.1	Female	Male	-4.75477	3.52436	0.00110962	0.0356068	NO
Choren_v00_mik.OX359195.1G846.1	Female	Male	-6.53787	7.68376	0.000215652	0.0118726	NO
Choren_v00_mik.OX359195.1G846.2	Female	Male	-7.82429	5.30688	0.000150387	0.00913655	NO
Choren_v00_mik.OX359195.1G852.1	Female	Male	1.99211	6.69079	4.68001e-05	0.00417342	NO
Choren_v00_mik.OX359195.1G944.1	Female	Male	-3.52033	5.62128	0.000350551	0.016294	NO
Choren_v00_mik.OX359195.1G970.1	Female	Male	4.12106	2.03788	6.84987e-05	0.00549758	NO
Choren_v00_mik.OX359195.1G996.1	Female	Male	-2.50911	6.71117	0.000862002	0.0304325	NO
Choren_v00_mik.OX359196.1G1006.2	Female	Male	1.55591	6.75813	0.00164945	0.0457137	NO
Choren_v00_mik.OX359196.1G1030.1	Female	Male	3.20755	2.95896	0.00102956	0.0338659	NO
Choren_v00_mik.OX359196.1G1076.1	Female	Male	-3.14694	7.05577	8.46622e-05	0.00629	NO
Choren_v00_mik.OX359196.1G1112.1	Female	Male	1.49189	7.7752	0.000599114	0.0238658	NO
Choren_v00_mik.OX359196.1G1121.1	Female	Male	-3.05626	3.70162	0.000159524	0.00955054	NO
Choren_v00_mik.OX359196.1G1159.1	Female	Male	16.2291	5.63295	1.99403e-26	2.45924e-22	NO
Choren_v00_mik.OX359196.1G116.1	Female	Male	-3.02955	5.43484	0.000404978	0.0180528	NO
Choren_v00_mik.OX359196.1G1169.1	Female	Male	4.17108	4.53047	0.00121595	0.0379654	NO
Choren_v00_mik.OX359196.1G1208.1	Female	Male	-6.38442	1.34183	0.000450478	0.0195855	NO
Choren_v00_mik.OX359196.1G122.1	Female	Male	-3.2441	3.63868	0.000463937	0.0199363	NO
Choren_v00_mik.OX359196.1G1269.1	Female	Male	-2.84793	7.06082	0.000170395	0.010023	NO
Choren_v00_mik.OX359196.1G127.1	Female	Male	-3.92961	7.2729	0.000112286	0.00755359	NO
Choren_v00_mik.OX359196.1G1271.1	Female	Male	8.71468	1.01767	4.14978e-05	0.00390682	NO
Choren_v00_mik.OX359196.1G1272.1	Female	Male	-3.48068	9.31204	7.55436e-05	0.00585961	NO
Choren_v00_mik.OX359196.1G143.1	Female	Male	5.05216	3.73864	4.1157e-10	3.23993e-07	NO
Choren_v00_mik.OX359196.1G241.1	Female	Male	-13.9112	3.31716	8.84255e-11	7.78966e-08	NO
Choren_v00_mik.OX359196.1G286.1	Female	Male	4.54871	2.62311	0.00139622	0.0415931	NO
Choren_v00_mik.OX359196.1G294.1	Female	Male	5.19756	1.518	0.00161861	0.0452571	NO
Choren_v00_mik.OX359196.1G317.1	Female	Male	13.2368	2.64507	3.60457e-09	2.11691e-06	NO
Choren_v00_mik.OX359196.1G347.1	Female	Male	-6.27379	7.70928	4.82025e-07	0.000134094	NO
Choren_v00_mik.OX359196.1G371.3	Female	Male	-3.29081	0.0367097	0.000469858	0.020144	NO
Choren_v00_mik.OX359196.1G421.2	Female	Male	-2.78605	5.66205	0.000113445	0.00760387	NO
Choren_v00_mik.OX359196.1G465.1	Female	Male	7.10713	1.68278	2.41072e-05	0.00271107	NO
Choren_v00_mik.OX359196.1G468.1	Female	Male	2.66458	4.02064	0.00141596	0.0419784	NO
Choren_v00_mik.OX359196.1G491.1	Female	Male	5.15683	6.59441	0.000889932	0.0308013	NO
Choren_v00_mik.OX359196.1G497.1	Female	Male	2.23749	7.73526	0.000129763	0.00834971	NO
Choren_v00_mik.OX359196.1G502.1	Female	Male	-2.3113	6.3945	0.000867726	0.0305728	NO
Choren_v00_mik.OX359196.1G514.1	Female	Male	5.63095	8.13464	4.50621e-17	1.1115e-13	NO
Choren_v00_mik.OX359196.1G558.1	Female	Male	-4.89415	5.83193	4.10374e-05	0.00387983	NO
Choren_v00_mik.OX359196.1G561.1	Female	Male	-9.57845	7.0485	6.64982e-07	0.00017574	NO
Choren_v00_mik.OX359196.1G586.1	Female	Male	-8.16891	4.64608	0.000817825	0.0293205	NO
Choren_v00_mik.OX359196.1G620.1	Female	Male	-4.26768	1.71417	0.000702208	0.0265654	NO
Choren_v00_mik.OX359196.1G621.1	Female	Male	-3.0342	6.95244	0.000305868	0.0147932	NO
Choren_v00_mik.OX359196.1G635.2	Female	Male	2.6043	5.25779	6.13602e-06	0.00103665	NO
Choren_v00_mik.OX359196.1G639.1	Female	Male	-3.45261	6.89761	0.000301466	0.0147344	NO
Choren_v00_mik.OX359196.1G680.1	Female	Male	-3.78288	7.82989	4.69084e-05	0.00417342	NO
Choren_v00_mik.OX359196.1G746.1	Female	Male	-3.0769	2.1713	0.000234016	0.0125484	NO
Choren_v00_mik.OX359196.1G752.1	Female	Male	-5.02804	5.04659	8.2792e-06	0.00130363	NO
Choren_v00_mik.OX359196.1G754.1	Female	Male	-2.40092	5.10919	0.000344661	0.0161012	NO
Choren_v00_mik.OX359196.1G757.1	Female	Male	-2.61255	5.87632	0.000763689	0.0281712	NO
Choren_v00_mik.OX359196.1G76.1	Female	Male	-4.01158	8.05183	4.90596e-06	0.00086436	NO
Choren_v00_mik.OX359196.1G767.1	Female	Male	-4.84102	6.36309	0.000878474	0.030679	NO
Choren_v00_mik.OX359196.1G771.1	Female	Male	-3.56977	7.3172	5.95488e-05	0.00500311	NO
Choren_v00_mik.OX359196.1G791.1	Female	Male	-2.63433	7.70049	0.000534676	0.0222275	NO
Choren_v00_mik.OX359196.1G804.1	Female	Male	-3.85177	8.0685	5.05992e-05	0.00444684	NO
Choren_v00_mik.OX359196.1G805.3	Female	Male	-3.60809	4.69072	0.00133213	0.0400806	NO
Choren_v00_mik.OX359196.1G809.1	Female	Male	-3.55318	6.7346	6.98188e-05	0.00555532	NO
Choren_v00_mik.OX359196.1G809.2	Female	Male	-3.12426	6.56516	9.05392e-05	0.00657212	NO
Choren_v00_mik.OX359196.1G817.1	Female	Male	-4.40418	7.0412	0.000267813	0.0136436	NO
Choren_v00_mik.OX359196.1G821.1	Female	Male	-2.41909	5.6169	0.00148361	0.043069	NO
Choren_v00_mik.OX359196.1G84.1	Female	Male	-4.35366	9.50278	2.20637e-05	0.00254832	NO
Choren_v00_mik.OX359196.1G841.1	Female	Male	-5.31597	4.98667	9.49671e-06	0.00141112	NO
Choren_v00_mik.OX359196.1G85.1	Female	Male	-4.46417	8.05439	1.07843e-05	0.00154655	NO
Choren_v00_mik.OX359196.1G87.1	Female	Male	-7.60432	5.6814	3.55713e-06	0.00068547	NO
Choren_v00_mik.OX359196.1G876.1	Female	Male	-4.60653	5.15222	6.35805e-06	0.00106928	NO
Choren_v00_mik.OX359196.1G891.1	Female	Male	-4.7417	8.60083	2.03533e-05	0.00240591	NO
Choren_v00_mik.OX359196.1G896.1	Female	Male	-3.7883	7.15626	9.27789e-06	0.0014077	NO
Choren_v00_mik.OX359196.1G907.2	Female	Male	-13.0658	2.47386	6.58246e-06	0.00109705	NO
Choren_v00_mik.OX359196.1G920.1	Female	Male	2.06051	6.19697	8.67046e-05	0.00640081	NO
Choren_v00_mik.OX359196.1G93.1	Female	Male	-4.091	4.84982	0.000320289	0.0152596	NO
Choren_v00_mik.OX359196.1G93.2	Female	Male	-3.80215	4.23062	0.000700294	0.0265202	NO
Choren_v00_mik.OX359196.1G932.1	Female	Male	3.19434	4.25724	0.000137512	0.00857979	NO
Choren_v00_mik.OX359196.1G932.2	Female	Male	2.77188	3.92734	0.000735315	0.0273702	NO
Choren_v00_mik.OX359196.1G933.1	Female	Male	4.84177	2.87201	1.4759e-07	5.20065e-05	NO
Choren_v00_mik.OX359196.1G936.1	Female	Male	-7.00421	5.20825	3.52939e-07	0.00010531	NO
Choren_v00_mik.OX359196.1G963.1	Female	Male	-2.99153	4.74511	0.00173677	0.047145	NO
Choren_v00_mik.OX359196.1G963.2	Female	Male	-3.38009	3.95461	0.00115423	0.0366254	NO
Choren_v00_mik.OX359196.1G995.1	Female	Male	2.59046	6.88564	1.20134e-05	0.00166388	NO
Choren_v00_mik.OX359196.1G999.1	Female	Male	2.23274	3.52576	0.00181451	0.0483828	NO
Choren_v00_mik.OX359197.1G1088.3	Female	Male	3.92594	3.27171	0.00114445	0.0364088	NO
Choren_v00_mik.OX359197.1G1100.1	Female	Male	-3.02294	5.86662	0.00170197	0.0464733	NO
Choren_v00_mik.OX359197.1G1125.1	Female	Male	-2.89956	6.91004	0.000334897	0.0157444	NO
Choren_v00_mik.OX359197.1G169.1	Female	Male	-3.44017	6.39872	0.000459802	0.019808	NO
Choren_v00_mik.OX359197.1G305.5	Female	Male	12.772	2.18195	5.99534e-05	0.00500311	NO
Choren_v00_mik.OX359197.1G341.2	Female	Male	-4.59192	5.33835	0.00021515	0.0118651	NO
Choren_v00_mik.OX359197.1G38.1	Female	Male	-3.49845	6.34564	0.0015584	0.0439141	NO
Choren_v00_mik.OX359197.1G673.1	Female	Male	-4.05982	5.50315	0.000305228	0.0147816	NO
Choren_v00_mik.OX359197.1G715.1	Female	Male	-3.91404	6.99977	1.1025e-05	0.00156891	NO
Choren_v00_mik.OX359197.1G73.1	Female	Male	-2.34799	7.71085	0.000774956	0.0283786	NO
Choren_v00_mik.OX359197.1G740.1	Female	Male	-3.84519	5.96397	6.19103e-05	0.0051016	NO
Choren_v00_mik.OX359197.1G814.1	Female	Male	-4.41918	6.23882	0.000137278	0.00857963	NO
Choren_v00_mik.OX359197.1G816.1	Female	Male	-5.11022	5.39248	0.000641825	0.0252201	NO
Choren_v00_mik.OX359197.1G818.1	Female	Male	-4.00662	6.9704	0.000264395	0.0135349	NO
Choren_v00_mik.OX359197.1G823.1	Female	Male	-4.1396	6.85542	0.0012232	0.0380311	NO
Choren_v00_mik.OX359197.1G829.1	Female	Male	-5.18424	4.11083	1.16491e-06	0.000278068	NO
Choren_v00_mik.OX359197.1G832.1	Female	Male	-2.9719	7.16404	0.000278478	0.013961	NO
Choren_v00_mik.OX359197.1G841.1	Female	Male	-3.05571	6.23759	0.000424807	0.0187112	NO
Choren_v00_mik.OX359197.1G857.1	Female	Male	-10.3756	-0.188272	0.00168879	0.0463185	NO
Choren_v00_mik.OX359197.1G869.1	Female	Male	-8.06511	7.94075	8.5527e-12	9.04118e-09	NO
Choren_v00_mik.OX359197.1G87.1	Female	Male	2.55349	10.4841	8.28001e-06	0.00130363	NO
Choren_v00_mik.OX359197.1G876.1	Female	Male	-2.60836	7.85909	0.000362794	0.0167578	NO
Choren_v00_mik.OX359197.1G920.1	Female	Male	-3.14031	6.18532	0.000310917	0.0149707	NO
Choren_v00_mik.OX359197.1G948.1	Female	Male	4.91427	2.02445	0.000446618	0.0194634	NO
Choren_v00_mik.OX359197.1G967.1	Female	Male	-2.62306	5.59942	0.00102973	0.0338659	NO
Choren_v00_mik.OX359198.1G10.1	Female	Male	-5.6694	5.47569	0.000102454	0.0071658	NO
Choren_v00_mik.OX359198.1G131.1	Female	Male	-2.40707	8.52151	0.000868457	0.0305728	NO
Choren_v00_mik.OX359198.1G139.1	Female	Male	3.79605	3.86342	5.00423e-06	0.000877496	NO
Choren_v00_mik.OX359198.1G210.1	Female	Male	10.6238	0.0564812	0.000133714	0.00845243	NO
Choren_v00_mik.OX359198.1G31.1	Female	Male	-2.10224	7.86898	0.00106315	0.0346016	NO
Choren_v00_mik.OX359198.1G37.1	Female	Male	-4.08556	9.37198	2.32113e-05	0.00265061	NO
Choren_v00_mik.OX359198.1G417.1	Female	Male	2.00616	5.16595	0.00184453	0.0489568	NO
Choren_v00_mik.OX359198.1G516.1	Female	Male	-7.79994	4.70781	2.77479e-07	8.43438e-05	NO
Choren_v00_mik.OX359198.1G550.1	Female	Male	2.74039	3.96519	0.000202958	0.0113372	NO
Choren_v00_mik.OX359198.1G715.1	Female	Male	-2.50646	7.2276	0.000434875	0.0190307	NO
Choren_v00_mik.OX359198.1G72.1	Female	Male	9.8299	-0.715987	0.000134957	0.00850645	NO
Choren_v00_mik.OX359198.1G721.1	Female	Male	-4.19539	6.78735	0.000262458	0.0135058	NO
Choren_v00_mik.OX359198.1G746.1	Female	Male	-3.38476	6.9263	0.000116978	0.00778429	NO
Choren_v00_mik.OX359198.1G748.1	Female	Male	-3.69849	10.118	0.000136949	0.00857963	NO
Choren_v00_mik.OX359198.1G756.1	Female	Male	-3.85101	4.8299	9.84738e-05	0.00693987	NO
Choren_v00_mik.OX359198.1G780.1	Female	Male	-3.45883	6.08116	0.000587075	0.0235574	NO
Choren_v00_mik.OX359198.1G785.1	Female	Male	-3.10443	5.3319	0.00129611	0.0394759	NO
Choren_v00_mik.OX359198.1G793.1	Female	Male	-3.8132	5.10427	0.000214764	0.0118651	NO
Choren_v00_mik.OX359198.1G795.1	Female	Male	-2.66299	7.11533	0.000422371	0.0186261	NO
Choren_v00_mik.OX359198.1G852.2	Female	Male	-4.04951	8.83861	0.000344449	0.0161012	NO
Choren_v00_mik.OX359198.1G858.1	Female	Male	2.15088	4.58419	0.000927605	0.0316902	NO
Choren_v00_mik.OX359198.1G888.1	Female	Male	2.02438	6.08284	0.000870159	0.0305793	NO
Choren_v00_mik.OX359198.1G895.1	Female	Male	6.54731	4.54504	0.000316082	0.0151682	NO
Choren_v00_mik.OX359198.1G896.1	Female	Male	2.14004	5.30105	0.000119308	0.00791086	NO
Choren_v00_mik.OX359198.1G9.1	Female	Male	-9.04574	2.07994	0.000582377	0.0233956	NO
Choren_v00_mik.OX359198.1G983.1	Female	Male	-5.36371	6.93172	0.000105997	0.00734413	NO
Choren_v00_mik.OX359199.1G1004.1	Female	Male	-6.99344	5.15881	0.000679209	0.0260415	NO
Choren_v00_mik.OX359199.1G102.1	Female	Male	4.18328	3.32862	1.51325e-05	0.00193065	NO
Choren_v00_mik.OX359199.1G1046.1	Female	Male	-4.17021	4.9683	0.000107709	0.00740731	NO
Choren_v00_mik.OX359199.1G1050.1	Female	Male	-9.97655	7.64171	5.44721e-06	0.000937401	NO
Choren_v00_mik.OX359199.1G1076.1	Female	Male	-8.30188	5.55625	0.000487241	0.0207212	NO
Choren_v00_mik.OX359199.1G1100.1	Female	Male	-3.35503	6.55679	4.20566e-05	0.00393119	NO
Choren_v00_mik.OX359199.1G1120.1	Female	Male	-4.11493	9.16727	2.16479e-05	0.00251081	NO
Choren_v00_mik.OX359199.1G1125.1	Female	Male	-2.96214	6.27426	0.000397694	0.0178355	NO
Choren_v00_mik.OX359199.1G1160.1	Female	Male	-14.2022	3.60781	9.46163e-08	3.64657e-05	NO
Choren_v00_mik.OX359199.1G1167.1	Female	Male	-6.79735	-0.0564899	5.19662e-05	0.00450831	NO
Choren_v00_mik.OX359199.1G1171.1	Female	Male	-7.68259	4.37162	4.21483e-05	0.00393119	NO
Choren_v00_mik.OX359199.1G1193.1	Female	Male	-3.51107	5.17706	0.0005399	0.0223339	NO
Choren_v00_mik.OX359199.1G125.1	Female	Male	-2.92145	4.06377	0.00189441	0.0497867	NO
Choren_v00_mik.OX359199.1G20.1	Female	Male	2.71637	5.82646	4.47449e-06	0.000827758	NO
Choren_v00_mik.OX359199.1G220.1	Female	Male	1.95219	5.38436	0.000463408	0.0199363	NO
Choren_v00_mik.OX359199.1G223.1	Female	Male	2.2302	6.37885	0.000574366	0.023124	NO
Choren_v00_mik.OX359199.1G295.1	Female	Male	1.67555	6.77555	0.000846412	0.0301051	NO
Choren_v00_mik.OX359199.1G298.2	Female	Male	-2.52097	7.57595	0.000678291	0.0260415	NO
Choren_v00_mik.OX359199.1G301.1	Female	Male	4.51801	8.77004	8.51786e-09	4.71455e-06	NO
Choren_v00_mik.OX359199.1G332.1	Female	Male	-3.01351	5.37708	0.00167656	0.0461199	NO
Choren_v00_mik.OX359199.1G35.1	Female	Male	-3.66774	7.47726	7.1264e-05	0.00564564	NO
Choren_v00_mik.OX359199.1G5.1	Female	Male	-2.42699	5.75491	0.000285584	0.0142021	NO
Choren_v00_mik.OX359199.1G515.1	Female	Male	-4.54316	4.16643	2.72827e-05	0.00297768	NO
Choren_v00_mik.OX359199.1G516.1	Female	Male	2.14053	3.87227	0.00162424	0.0453206	NO
Choren_v00_mik.OX359199.1G525.1	Female	Male	3.50297	6.96545	0.000300219	0.0146929	NO
Choren_v00_mik.OX359199.1G556.1	Female	Male	9.35469	-1.17143	0.000505038	0.0212823	NO
Choren_v00_mik.OX359199.1G561.1	Female	Male	8.09841	3.4402	6.04164e-06	0.00103011	NO
Choren_v00_mik.OX359199.1G577.2	Female	Male	-3.55072	6.9366	0.000348883	0.0162521	NO
Choren_v00_mik.OX359199.1G604.1	Female	Male	-5.10343	6.32747	0.000516381	0.0216617	NO
Choren_v00_mik.OX359199.1G627.1	Female	Male	-4.17663	5.57041	1.22857e-05	0.00168355	NO
Choren_v00_mik.OX359199.1G652.1	Female	Male	-12.189	7.75902	0.000268085	0.0136436	NO
Choren_v00_mik.OX359199.1G663.1	Female	Male	1.80623	6.92505	0.0017509	0.0473896	NO
Choren_v00_mik.OX359199.1G683.1	Female	Male	-7.29108	3.8137	0.000594748	0.0237636	NO
Choren_v00_mik.OX359199.1G704.1	Female	Male	-4.0928	4.90882	1.08978e-06	0.000265268	NO
Choren_v00_mik.OX359199.1G72.1	Female	Male	-9.57313	8.03752	0.00110006	0.0353616	NO
Choren_v00_mik.OX359199.1G72.2	Female	Male	-6.58877	8.61631	2.11455e-08	1.02943e-05	NO
Choren_v00_mik.OX359199.1G724.1	Female	Male	-4.35979	1.93684	0.000374683	0.017157	NO
Choren_v00_mik.OX359199.1G735.1	Female	Male	-3.22097	7.16441	0.000578568	0.0232678	NO
Choren_v00_mik.OX359199.1G735.2	Female	Male	-9.88113	-0.670522	0.000163037	0.00971371	NO
Choren_v00_mik.OX359199.1G74.2	Female	Male	10.4406	1.63659	0.000767086	0.0282402	NO
Choren_v00_mik.OX359199.1G746.1	Female	Male	-2.91618	7.30762	0.000500368	0.0211337	NO
Choren_v00_mik.OX359199.1G747.1	Female	Male	-4.49294	-0.343534	0.00127341	0.0390671	NO
Choren_v00_mik.OX359199.1G771.1	Female	Male	4.61274	8.63005	2.45265e-15	5.04143e-12	NO
Choren_v00_mik.OX359199.1G779.1	Female	Male	-12.2093	5.87934	8.22695e-08	3.273e-05	NO
Choren_v00_mik.OX359199.1G790.1	Female	Male	-2.28864	5.05617	0.0012543	0.0386058	NO
Choren_v00_mik.OX359199.1G840.1	Female	Male	3.12248	3.17993	0.00071185	0.0268016	NO
Choren_v00_mik.OX359199.1G878.1	Female	Male	10.3794	-0.181803	2.005e-09	1.23638e-06	NO
Choren_v00_mik.OX359199.1G884.1	Female	Male	-3.10865	7.4273	0.000435146	0.0190307	NO
Choren_v00_mik.OX359199.1G910.1	Female	Male	-2.13682	6.11021	0.00113966	0.0363191	NO
Choren_v00_mik.OX359199.1G920.1	Female	Male	-6.62549	4.77281	1.31051e-06	0.000306883	NO
Choren_v00_mik.OX359199.1G927.1	Female	Male	-2.52109	5.80801	0.000291403	0.0143863	NO
Choren_v00_mik.OX359199.1G929.1	Female	Male	-2.23962	7.51415	0.00141426	0.0419616	NO
Choren_v00_mik.OX359199.1G940.1	Female	Male	1.47208	8.50096	0.00176409	0.0475727	NO
Choren_v00_mik.OX359199.1G940.2	Female	Male	1.67569	8.61133	0.000301891	0.0147345	NO
Choren_v00_mik.OX359199.1G967.1	Female	Male	-4.41412	6.2303	0.00019925	0.0112379	NO
Choren_v00_mik.OX359199.1G978.1	Female	Male	-3.0974	4.71617	0.000153257	0.00928044	NO
Choren_v00_mik.OX359199.1G991.1	Female	Male	-3.86605	4.02146	0.000710061	0.0268016	NO
Choren_v00_mik.OX359199.1G998.1	Female	Male	-4.57632	5.0243	0.00151555	0.0434343	NO
Choren_v00_mik.OX359200.1G1019.1	Female	Male	3.91382	1.22415	3.19005e-05	0.00331624	NO
Choren_v00_mik.OX359200.1G1037.1	Female	Male	3.30189	4.35502	0.00104273	0.0341623	NO
Choren_v00_mik.OX359200.1G1049.1	Female	Male	-3.97907	6.2484	1.99937e-05	0.00237861	NO
Choren_v00_mik.OX359200.1G1064.1	Female	Male	1.56594	5.53035	0.00132801	0.0400693	NO
Choren_v00_mik.OX359200.1G1080.1	Female	Male	-5.31784	9.58311	2.13947e-06	0.000458351	NO
Choren_v00_mik.OX359200.1G1089.1	Female	Male	-7.53471	7.0486	1.11337e-06	0.000267492	NO
Choren_v00_mik.OX359200.1G1092.1	Female	Male	1.93489	5.58263	0.000916292	0.0314197	NO
Choren_v00_mik.OX359200.1G1094.1	Female	Male	-2.36753	6.55035	0.00121539	0.0379654	NO
Choren_v00_mik.OX359200.1G1101.1	Female	Male	2.88259	2.82246	0.000531043	0.0221262	NO
Choren_v00_mik.OX359200.1G1102.1	Female	Male	-12.8358	8.43401	7.78259e-09	4.42997e-06	NO
Choren_v00_mik.OX359200.1G1104.1	Female	Male	5.06353	5.10857	1.40829e-07	5.04859e-05	NO
Choren_v00_mik.OX359200.1G1108.1	Female	Male	-4.29249	4.59025	1.62219e-05	0.00203456	NO
Choren_v00_mik.OX359200.1G138.3	Female	Male	2.19928	3.87067	0.000415761	0.0184445	NO
Choren_v00_mik.OX359200.1G17.1	Female	Male	-3.53975	7.21775	0.00019432	0.0110781	NO
Choren_v00_mik.OX359200.1G207.1	Female	Male	7.30889	2.80282	0.000141123	0.00872742	NO
Choren_v00_mik.OX359200.1G218.1	Female	Male	-3.78483	8.02892	7.70122e-05	0.00589933	NO
Choren_v00_mik.OX359200.1G235.1	Female	Male	4.72309	-1.56341	0.00173372	0.0471315	NO
Choren_v00_mik.OX359200.1G247.1	Female	Male	-5.38782	4.05661	0.000119583	0.00791496	NO
Choren_v00_mik.OX359200.1G353.1	Female	Male	-5.33642	5.18773	8.65018e-05	0.00640081	NO
Choren_v00_mik.OX359200.1G38.1	Female	Male	7.9345	0.68312	0.00023141	0.0124447	NO
Choren_v00_mik.OX359200.1G394.1	Female	Male	-4.01884	5.83722	0.000199557	0.0112381	NO
Choren_v00_mik.OX359200.1G43.1	Female	Male	-3.64257	7.29756	2.7163e-06	0.000561455	NO
Choren_v00_mik.OX359200.1G435.1	Female	Male	-2.98599	1.82341	0.000318734	0.0152559	NO
Choren_v00_mik.OX359200.1G45.1	Female	Male	-4.85835	6.58912	1.52249e-06	0.00034988	NO
Choren_v00_mik.OX359200.1G51.1	Female	Male	-2.71954	4.04179	0.00167653	0.0461199	NO
Choren_v00_mik.OX359200.1G56.1	Female	Male	-4.12819	7.19158	8.26014e-05	0.00617439	NO
Choren_v00_mik.OX359200.1G601.1	Female	Male	4.44212	3.88601	1.50586e-09	9.4433e-07	NO
Choren_v00_mik.OX359200.1G614.1	Female	Male	3.38778	0.565334	6.01742e-05	0.00500311	NO
Choren_v00_mik.OX359200.1G660.1	Female	Male	-5.0785	7.34233	6.69582e-05	0.00541222	NO
Choren_v00_mik.OX359200.1G69.1	Female	Male	2.92968	3.79627	9.06316e-05	0.00657212	NO
Choren_v00_mik.OX359200.1G742.1	Female	Male	1.82131	5.50809	0.00131255	0.0398711	NO
Choren_v00_mik.OX359200.1G80.1	Female	Male	-2.80462	1.48386	0.00121175	0.0379633	NO
Choren_v00_mik.OX359200.1G816.1	Female	Male	-3.35128	5.79627	0.000128588	0.00830299	NO
Choren_v00_mik.OX359200.1G925.1	Female	Male	-2.04875	7.31657	0.0012387	0.0383521	NO
Choren_v00_mik.OX359200.1G929.1	Female	Male	-4.50462	6.71982	3.85778e-05	0.00377916	NO
Choren_v00_mik.OX359200.1G93.1	Female	Male	-2.85443	7.09994	0.000359992	0.0166827	NO
Choren_v00_mik.OX359200.1G958.1	Female	Male	-5.43929	8.60683	1.20972e-05	0.00166388	NO
Choren_v00_mik.OX359200.1G98.1	Female	Male	-13.252	2.65977	0.000986297	0.032935	NO
Choren_v00_mik.OX359200.1G985.1	Female	Male	13.7067	3.11356	2.7542e-14	4.43055e-11	NO
Choren_v00_mik.OX359200.1G990.1	Female	Male	-7.74576	4.06157	9.15917e-05	0.00660585	NO
Choren_v00_mik.OX359200.1G993.1	Female	Male	2.15639	6.07066	1.09541e-05	0.00156483	NO
Choren_v00_mik.OX359200.1G995.1	Female	Male	-3.88148	5.80112	0.00026554	0.01357	NO
Choren_v00_mik.OX359201.1G1003.1	Female	Male	-7.2183	6.38818	9.31877e-07	0.0002314	NO
Choren_v00_mik.OX359201.1G132.1	Female	Male	-3.66641	0.333668	0.00107967	0.0350093	NO
Choren_v00_mik.OX359201.1G146.1	Female	Male	-4.47049	6.94525	4.64996e-05	0.00417342	NO
Choren_v00_mik.OX359201.1G154.1	Female	Male	1.52846	7.84315	0.00108906	0.0350993	NO
Choren_v00_mik.OX359201.1G190.1	Female	Male	-7.67216	7.35695	0.000108945	0.00744113	NO
Choren_v00_mik.OX359201.1G2.1	Female	Male	2.88465	4.62366	0.00111144	0.0356346	NO
Choren_v00_mik.OX359201.1G211.1	Female	Male	-3.15383	4.79085	0.000183456	0.0106058	NO
Choren_v00_mik.OX359201.1G216.1	Female	Male	-3.53757	6.11493	0.000213385	0.0118366	NO
Choren_v00_mik.OX359201.1G247.1	Female	Male	-8.37518	2.78603	0.00117482	0.0369934	NO
Choren_v00_mik.OX359201.1G247.2	Female	Male	-9.53158	5.06728	6.69241e-06	0.0010987	NO
Choren_v00_mik.OX359201.1G268.1	Female	Male	-3.37081	5.90413	0.000200163	0.011255	NO
Choren_v00_mik.OX359201.1G285.1	Female	Male	-8.81816	11.0636	6.10207e-11	5.7274e-08	NO
Choren_v00_mik.OX359201.1G300.1	Female	Male	-3.94701	8.34853	3.87171e-05	0.00377916	NO
Choren_v00_mik.OX359201.1G300.2	Female	Male	-4.37542	5.05458	0.000360266	0.0166827	NO
Choren_v00_mik.OX359201.1G340.1	Female	Male	3.31684	0.359673	0.00145957	0.0427236	NO
Choren_v00_mik.OX359201.1G346.1	Female	Male	-3.59201	5.84579	0.000505906	0.0212947	NO
Choren_v00_mik.OX359201.1G38.1	Female	Male	3.50129	5.3512	9.34169e-09	5.08284e-06	NO
Choren_v00_mik.OX359201.1G578.1	Female	Male	-5.85441	5.93516	0.00030518	0.0147816	NO
Choren_v00_mik.OX359201.1G591.1	Female	Male	-4.32301	3.3704	1.9643e-05	0.00234442	NO
Choren_v00_mik.OX359201.1G597.1	Female	Male	-4.5563	7.06169	6.8077e-06	0.00110473	NO
Choren_v00_mik.OX359201.1G69.1	Female	Male	2.76919	5.13199	0.000546204	0.0224295	NO
Choren_v00_mik.OX359201.1G697.1	Female	Male	-3.76416	6.38876	0.00124828	0.0385683	NO
Choren_v00_mik.OX359201.1G70.1	Female	Male	-11.7509	1.16605	0.000141294	0.00872742	NO
Choren_v00_mik.OX359201.1G72.2	Female	Male	-10.6902	0.118363	6.12696e-06	0.00103665	NO
Choren_v00_mik.OX359201.1G743.1	Female	Male	-3.20775	7.69836	0.000216696	0.0118896	NO
Choren_v00_mik.OX359201.1G792.1	Female	Male	-3.49685	6.67717	0.000382595	0.0173263	NO
Choren_v00_mik.OX359201.1G804.1	Female	Male	-3.61041	6.60791	9.07688e-05	0.00657212	NO
Choren_v00_mik.OX359201.1G822.1	Female	Male	12.1807	1.59424	9.10869e-13	1.16211e-09	NO
Choren_v00_mik.OX359201.1G823.1	Female	Male	8.39205	7.11822	1.96092e-08	9.67363e-06	NO
Choren_v00_mik.OX359201.1G829.1	Female	Male	-3.95552	8.02278	8.88087e-06	0.00135778	NO
Choren_v00_mik.OX359201.1G831.1	Female	Male	-3.66667	1.95694	0.00136737	0.0408655	NO
Choren_v00_mik.OX359201.1G838.1	Female	Male	-5.03168	-0.785657	7.61464e-05	0.00588142	NO
Choren_v00_mik.OX359201.1G847.1	Female	Male	8.90972	10.4358	5.17245e-22	2.73393e-18	NO
Choren_v00_mik.OX359201.1G86.1	Female	Male	-6.17478	7.72219	0.000127001	0.00825822	NO
Choren_v00_mik.OX359201.1G875.1	Female	Male	-5.25426	5.14464	0.00027715	0.0139135	NO
Choren_v00_mik.OX359201.1G884.2	Female	Male	-3.92925	4.12491	2.54274e-05	0.00282519	NO
Choren_v00_mik.OX359201.1G9.1	Female	Male	-2.88975	5.12955	0.000905557	0.0311672	NO
Choren_v00_mik.OX359201.1G91.1	Female	Male	4.5255	1.99143	0.000678645	0.0260415	NO
Choren_v00_mik.OX359201.1G92.1	Female	Male	-3.50478	2.50843	0.00177401	0.0476663	NO
Choren_v00_mik.OX359201.1G926.1	Female	Male	-3.3728	8.05883	0.000270232	0.0136963	NO
Choren_v00_mik.OX359201.1G927.1	Female	Male	-3.38312	7.00541	0.00142277	0.0421038	NO
Choren_v00_mik.OX359201.1G961.1	Female	Male	2.95675	5.94221	3.05351e-05	0.0032146	NO
Choren_v00_mik.OX359201.1G962.1	Female	Male	-2.42564	6.39981	0.000666783	0.0258441	NO
Choren_v00_mik.OX359201.1G970.1	Female	Male	-6.14195	5.05487	1.02285e-05	0.00149583	NO
Choren_v00_mik.OX359201.1G988.1	Female	Male	-4.054	3.39657	0.000196859	0.0111722	NO
Choren_v00_mik.OX359201.1G989.1	Female	Male	-6.42008	6.95963	1.49403e-07	5.21486e-05	NO
Choren_v00_mik.OX359201.1G989.2	Female	Male	-5.53764	5.20314	7.99864e-06	0.00127014	NO
Choren_v00_mik.OX359202.1G104.2	Female	Male	-2.67361	4.50209	0.000291164	0.0143863	NO
Choren_v00_mik.OX359202.1G110.1	Female	Male	-6.68541	2.84415	0.00098162	0.0328085	NO
Choren_v00_mik.OX359202.1G111.1	Female	Male	-3.64	7.32295	4.32221e-05	0.00398797	NO
Choren_v00_mik.OX359202.1G114.1	Female	Male	-4.29178	9.27403	0.000203675	0.011349	NO
Choren_v00_mik.OX359202.1G177.1	Female	Male	-3.52611	5.34414	0.000469327	0.020144	NO
Choren_v00_mik.OX359202.1G217.1	Female	Male	-4.24519	4.69288	4.11063e-05	0.00387983	NO
Choren_v00_mik.OX359202.1G245.1	Female	Male	-7.84041	2.41964	0.00123697	0.0383521	NO
Choren_v00_mik.OX359202.1G277.1	Female	Male	-4.64076	6.67916	2.80066e-06	0.000575676	NO
Choren_v00_mik.OX359202.1G3.1	Female	Male	-3.32296	7.73576	6.00005e-05	0.00500311	NO
Choren_v00_mik.OX359202.1G327.2	Female	Male	-3.52808	5.02512	0.000329603	0.0155946	NO
Choren_v00_mik.OX359202.1G330.1	Female	Male	-3.71072	8.74918	3.37574e-05	0.00343129	NO
Choren_v00_mik.OX359202.1G349.1	Female	Male	-3.60072	7.54371	0.000217699	0.0118975	NO
Choren_v00_mik.OX359202.1G53.1	Female	Male	2.50519	2.84078	0.00102471	0.0337907	NO
Choren_v00_mik.OX359202.1G592.1	Female	Male	-2.75818	5.76521	0.0012915	0.0394586	NO
Choren_v00_mik.OX359202.1G641.1	Female	Male	-7.66275	6.83187	7.66155e-05	0.00588142	NO
Choren_v00_mik.OX359202.1G648.1	Female	Male	-2.37837	5.39105	0.001741	0.0471906	NO
Choren_v00_mik.OX359202.1G670.1	Female	Male	-8.59058	-0.606853	0.000659282	0.0256766	NO
Choren_v00_mik.OX359202.1G685.1	Female	Male	-3.46484	5.70255	3.29447e-05	0.00339532	NO
Choren_v00_mik.OX359202.1G706.1	Female	Male	-10.267	2.34306	0.000592369	0.0237198	NO
Choren_v00_mik.OX359202.1G756.1	Female	Male	9.39053	-1.13749	0.000164086	0.0097605	NO
Choren_v00_mik.OX359202.1G779.1	Female	Male	-2.28181	6.64541	0.00189229	0.0497867	NO
Choren_v00_mik.OX359202.1G791.1	Female	Male	-4.21755	5.84272	4.73115e-06	0.000849747	NO
Choren_v00_mik.OX359202.1G798.1	Female	Male	-3.13107	4.95965	7.85221e-05	0.00594118	NO
Choren_v00_mik.OX359202.1G81.1	Female	Male	-2.50344	4.80604	0.000495211	0.0209637	NO
Choren_v00_mik.OX359202.1G823.1	Female	Male	-4.62417	5.87602	0.000594165	0.0237636	NO
Choren_v00_mik.OX359202.1G824.1	Female	Male	-4.61888	5.16522	8.06598e-05	0.00606572	NO
Choren_v00_mik.OX359202.1G827.1	Female	Male	-6.88084	1.01366	4.23039e-05	0.00393119	NO
Choren_v00_mik.OX359202.1G856.1	Female	Male	-3.47897	7.55047	6.9156e-05	0.00551444	NO
Choren_v00_mik.OX359202.1G875.2	Female	Male	-10.6578	0.0873722	6.16072e-05	0.00508796	NO
Choren_v00_mik.OX359202.1G882.1	Female	Male	-4.39094	6.20683	1.79324e-05	0.00216824	NO
Choren_v00_mik.OX359202.1G899.1	Female	Male	2.89679	8.1246	1.64014e-07	5.61883e-05	NO
Choren_v00_mik.OX359202.1G906.1	Female	Male	-3.82109	7.57006	2.72609e-05	0.00297768	NO
Choren_v00_mik.OX359202.1G913.1	Female	Male	-2.94191	6.50984	0.000122102	0.00803764	NO
Choren_v00_mik.OX359202.1G918.1	Female	Male	-2.82488	5.32752	0.000452719	0.0196367	NO
Choren_v00_mik.OX359202.1G928.1	Female	Male	-5.54111	5.69595	1.36461e-05	0.00179685	NO
Choren_v00_mik.OX359202.1G934.1	Female	Male	-7.30655	1.07806	0.000124419	0.00811882	NO
Choren_v00_mik.OX359202.1G944.1	Female	Male	-2.90732	5.24843	0.00134583	0.0403193	NO
Choren_v00_mik.OX359202.1G948.2	Female	Male	1.80903	6.94467	6.5231e-05	0.00530435	NO
Choren_v00_mik.OX359202.1G951.1	Female	Male	3.95876	0.690344	0.000249621	0.0130448	NO
Choren_v00_mik.OX359202.1G954.1	Female	Male	-3.15088	7.94025	0.000129135	0.00832382	NO
MSTRG.1000.2	Female	Male	3.98706	3.98007	0.0014321	0.0421531	NO
MSTRG.10014.3	Female	Male	-5.49384	0.306275	0.000478772	0.0205024	NO
MSTRG.10020.10	Female	Male	4.10004	3.76218	0.000844118	0.0300592	NO
MSTRG.1009.2	Female	Male	-6.20639	1.69195	0.000775448	0.0283786	NO
MSTRG.10113.1	Female	Male	11.8822	1.29838	2.72541e-07	8.40313e-05	NO
MSTRG.10113.8	Female	Male	5.99701	0.946017	2.01215e-05	0.00238614	NO
MSTRG.10139.16	Female	Male	-14.9306	4.33525	0.000259848	0.0134168	NO
MSTRG.10179.1	Female	Male	6.90218	0.929427	0.000304174	0.0147816	NO
MSTRG.10199.2	Female	Male	10.8748	2.06783	0.000640244	0.0252004	NO
MSTRG.10253.8	Female	Male	7.37057	-0.285937	0.000961364	0.032371	NO
MSTRG.10268.1	Female	Male	12.6097	2.02046	0.00110355	0.0354428	NO
MSTRG.10293.1	Female	Male	-3.20706	2.9111	0.000769817	0.0282655	NO
MSTRG.10340.2	Female	Male	3.1287	3.91114	2.61115e-05	0.00288388	NO
MSTRG.10392.2	Female	Male	-2.54162	5.3211	0.000728153	0.0272165	NO
MSTRG.10394.1	Female	Male	-5.29318	3.7368	0.000894231	0.0309212	NO
MSTRG.10394.4	Female	Male	-8.05542	2.5886	0.000288299	0.0142986	NO
MSTRG.10403.1	Female	Male	-5.22054	2.23028	7.53149e-05	0.00585415	NO
MSTRG.10462.1	Female	Male	-12.8881	2.2972	0.000614216	0.0243832	NO
MSTRG.10462.15	Female	Male	-2.52311	4.7509	0.000664343	0.0257923	NO
MSTRG.10549.1	Female	Male	-2.55957	5.87399	0.00088897	0.0308013	NO
MSTRG.10595.94	Female	Male	7.42316	-0.168264	0.00080606	0.0291162	NO
MSTRG.10609.2	Female	Male	-2.36491	4.05794	0.00165408	0.0457393	NO
MSTRG.10617.2	Female	Male	7.87755	1.15297	4.80535e-05	0.00425661	NO
MSTRG.10621.1	Female	Male	-4.11353	4.79477	0.00036538	0.0168352	NO
MSTRG.10637.1	Female	Male	-2.91179	7.18277	0.000877765	0.030679	NO
MSTRG.10637.4	Female	Male	-9.41691	5.64405	1.49876e-05	0.00191878	NO
MSTRG.10650.1	Female	Male	-3.98434	6.19097	0.00088989	0.0308013	NO
MSTRG.10672.6	Female	Male	2.99743	0.457898	0.00118967	0.037334	NO
MSTRG.10884.29	Female	Male	5.89144	-0.819115	0.000794012	0.0288582	NO
MSTRG.10918.5	Female	Male	14.9488	4.35358	0.000629986	0.0249292	NO
MSTRG.10933.1	Female	Male	-6.29141	3.75294	0.000802332	0.0290749	NO
MSTRG.10966.3	Female	Male	12.6207	2.03149	7.32409e-13	9.99327e-10	NO
MSTRG.10993.5	Female	Male	12.8042	2.21393	6.71679e-05	0.00541426	NO
MSTRG.11012.4	Female	Male	10.1055	-0.446825	0.000916094	0.0314197	NO
MSTRG.11015.11	Female	Male	10.6296	0.0641226	0.000418503	0.0184888	NO
MSTRG.11015.12	Female	Male	-6.42142	1.78804	0.00150553	0.0431806	NO
MSTRG.11015.24	Female	Male	-8.45734	2.03659	2.3714e-05	0.00269139	NO
MSTRG.11048.1	Female	Male	-13.2837	2.69138	0.000116631	0.00777522	NO
MSTRG.11076.1	Female	Male	6.38052	-0.731453	5.30736e-05	0.00458801	NO
MSTRG.11097.1	Female	Male	1.79936	5.93237	0.000562957	0.0228943	NO
MSTRG.11158.2	Female	Male	9.91683	-0.631228	2.73045e-08	1.232e-05	NO
MSTRG.11234.1	Female	Male	-2.59988	8.07005	0.000884312	0.0307688	NO
MSTRG.11234.4	Female	Male	-4.10938	3.54579	0.00100448	0.0333495	NO
MSTRG.11237.1	Female	Male	-4.51384	4.92938	0.00026661	0.0136059	NO
MSTRG.11330.7	Female	Male	11.1885	0.612485	0.000198961	0.0112379	NO
MSTRG.11361.3	Female	Male	15.2285	4.63307	0.000513668	0.0215723	NO
MSTRG.11369.12	Female	Male	6.74917	2.20696	0.000879723	0.030679	NO
MSTRG.11369.33	Female	Male	6.05783	0.986336	0.00151965	0.0435181	NO
MSTRG.11387.1	Female	Male	2.23768	4.69673	0.000278851	0.013961	NO
MSTRG.11407.1	Female	Male	-2.89475	4.45875	0.000321285	0.0152596	NO
MSTRG.11407.2	Female	Male	-3.16311	3.81382	0.00152424	0.0435821	NO
MSTRG.1143.3	Female	Male	-4.13131	4.5892	0.000427413	0.0188015	NO
MSTRG.11433.4	Female	Male	-4.62103	5.16621	2.1447e-05	0.00250321	NO
MSTRG.11453.2	Female	Male	-5.44996	4.12975	0.000901097	0.0310538	NO
MSTRG.11453.4	Female	Male	-8.22867	0.314539	0.00133351	0.0400806	NO
MSTRG.11457.7	Female	Male	2.71775	7.19531	4.28993e-07	0.000122095	NO
MSTRG.1152.10	Female	Male	12.0088	1.42462	0.000569648	0.0230343	NO
MSTRG.1152.5	Female	Male	14.5676	3.97292	4.62036e-06	0.000838833	NO
MSTRG.11530.6	Female	Male	-6.34423	-0.227266	0.00105404	0.0344815	NO
MSTRG.11556.1	Female	Male	-3.73668	5.65265	2.84964e-05	0.00308286	NO
MSTRG.11602.2	Female	Male	-4.28712	9.51003	7.32934e-05	0.0057453	NO
MSTRG.11602.5	Female	Male	-8.00109	11.5617	2.44403e-08	1.13033e-05	NO
MSTRG.11631.1	Female	Male	1.97545	5.02537	0.000807547	0.0291162	NO
MSTRG.11663.1	Female	Male	10.4875	-0.0762949	1.22796e-09	7.97076e-07	NO
MSTRG.11681.7	Female	Male	10.0436	-0.507268	0.000375479	0.0171723	NO
MSTRG.11688.1	Female	Male	-3.81459	0.973041	0.00181214	0.0483748	NO
MSTRG.11689.4	Female	Male	12.7709	2.18095	1.77356e-05	0.00215855	NO
MSTRG.11698.2	Female	Male	5.44134	3.44393	8.53138e-06	0.00131623	NO
MSTRG.11729.48	Female	Male	-5.25986	7.06658	1.40503e-05	0.00184163	NO
MSTRG.1173.1	Female	Male	-6.64769	2.34109	7.58622e-05	0.00587202	NO
MSTRG.11751.1	Female	Male	-5.88381	10.4484	4.85026e-05	0.00428293	NO
MSTRG.11752.1	Female	Male	-2.99947	3.35168	0.00153965	0.0437524	NO
MSTRG.11769.2	Female	Male	-15.2572	4.66161	0.000227896	0.0122914	NO
MSTRG.11773.4	Female	Male	-11.517	0.934277	2.51719e-05	0.00280522	NO
MSTRG.11813.1	Female	Male	17.3016	6.70513	4.07677e-05	0.0038676	NO
MSTRG.11815.30	Female	Male	-10.575	0.830214	0.000558946	0.0228009	NO
MSTRG.11815.32	Female	Male	-5.7265	3.02101	0.00066098	0.0256917	NO
MSTRG.11858.1	Female	Male	10.4652	-0.0980675	5.77074e-10	4.44816e-07	NO
MSTRG.11860.1	Female	Male	-2.60915	6.32097	0.00154565	0.0438135	NO
MSTRG.11861.2	Female	Male	-11.4774	0.896147	0.00113485	0.0361967	NO
MSTRG.11862.3	Female	Male	-4.75212	1.09206	0.000885665	0.0307688	NO
MSTRG.11903.1	Female	Male	-4.13259	1.38867	0.000998302	0.0331861	NO
MSTRG.11922.1	Female	Male	-7.88011	4.89368	0.00021866	0.0119208	NO
MSTRG.11994.1	Female	Male	-3.76849	7.82516	0.00133913	0.0401837	NO
MSTRG.11994.5	Female	Male	-12.2596	1.67168	0.0018393	0.0488869	NO
MSTRG.12005.1	Female	Male	-1.92794	5.55388	0.00168382	0.0462163	NO
MSTRG.12036.3	Female	Male	10.8744	0.302941	6.36208e-10	4.80389e-07	NO
MSTRG.12037.18	Female	Male	12.9258	2.33512	1.46218e-05	0.00189159	NO
MSTRG.12037.20	Female	Male	-11.7214	1.13751	1.34824e-05	0.00179685	NO
MSTRG.12075.1	Female	Male	5.26038	1.30196	0.000391183	0.0176075	NO
MSTRG.12096.1	Female	Male	2.61162	6.16044	0.000221309	0.0120062	NO
MSTRG.12098.1	Female	Male	-4.36939	4.17508	0.000540253	0.0223339	NO
MSTRG.1211.3	Female	Male	2.73568	3.29054	0.00131755	0.0399096	NO
MSTRG.12136.1	Female	Male	4.23787	-0.621558	0.00150319	0.0431806	NO
MSTRG.12141.1	Female	Male	-7.22086	5.48926	3.22551e-05	0.00334287	NO
MSTRG.12181.6	Female	Male	-12.6529	2.06325	0.00142908	0.0421531	NO
MSTRG.12192.2	Female	Male	-2.37821	4.69326	0.000572179	0.0230862	NO
MSTRG.12205.1	Female	Male	-3.08347	5.98824	0.00144414	0.0424398	NO
MSTRG.12214.1	Female	Male	5.6964	9.39039	6.60318e-15	1.22156e-11	NO
MSTRG.12217.1	Female	Male	13.6053	4.60629	0.000604335	0.0240428	NO
MSTRG.12237.1	Female	Male	-3.24955	-0.0815465	0.0014724	0.0429294	NO
MSTRG.12240.1	Female	Male	4.51952	5.57022	0.000214049	0.0118557	NO
MSTRG.12303.2	Female	Male	9.7188	-0.821743	0.000157731	0.00948928	NO
MSTRG.12331.12	Female	Male	-14.2864	3.69171	6.27417e-07	0.000168216	NO
MSTRG.12335.2	Female	Male	13.0187	2.42762	1.06586e-05	0.00154046	NO
MSTRG.12345.1	Female	Male	-5.9659	6.36865	4.02492e-07	0.00011544	NO
MSTRG.12390.1	Female	Male	-5.93749	4.98941	0.000145662	0.00890802	NO
MSTRG.12410.1	Female	Male	9.12585	6.57921	8.70764e-08	3.42738e-05	NO
MSTRG.12412.2	Female	Male	-3.73449	5.34144	0.000269672	0.0136963	NO
MSTRG.12427.2	Female	Male	-2.60503	8.92562	0.00056371	0.0228943	NO
MSTRG.1243.25	Female	Male	-7.98335	3.7056	0.000536801	0.0222908	NO
MSTRG.12476.5	Female	Male	9.76964	-0.773557	0.00018638	0.0107079	NO
MSTRG.12483.1	Female	Male	-4.37588	5.9083	5.96777e-05	0.00500311	NO
MSTRG.12483.3	Female	Male	-13.2428	4.67925	0.000110791	0.00751852	NO
MSTRG.12483.4	Female	Male	-14.4279	3.83316	6.62617e-05	0.00537636	NO
MSTRG.12483.5	Female	Male	-7.74086	4.50686	0.000694624	0.0263864	NO
MSTRG.12495.1	Female	Male	2.89008	4.99446	0.0017568	0.0474797	NO
MSTRG.12504.4	Female	Male	-3.73162	7.1598	0.00101431	0.0335375	NO
MSTRG.12515.2	Female	Male	-14.2561	3.66161	0.000378613	0.0172092	NO
MSTRG.12518.3	Female	Male	-16.0096	5.41348	2.2868e-07	7.42186e-05	NO
MSTRG.12525.1	Female	Male	3.92139	6.29721	2.91006e-05	0.00312993	NO
MSTRG.12541.2	Female	Male	-4.02828	4.58696	0.000966295	0.0324134	NO
MSTRG.12542.1	Female	Male	-2.74632	4.7834	0.000833861	0.0297512	NO
MSTRG.12542.3	Female	Male	-7.35715	4.89894	0.000102886	0.00718244	NO
MSTRG.12542.7	Female	Male	-3.65646	2.97755	0.00075023	0.0278169	NO
MSTRG.12548.7	Female	Male	-11.2103	0.6316	0.00178941	0.0478714	NO
MSTRG.12562.2	Female	Male	-7.64926	5.38878	0.000157532	0.00948928	NO
MSTRG.12562.5	Female	Male	-2.405	6.62817	0.001735	0.0471316	NO
MSTRG.12572.1	Female	Male	-2.87056	8.56976	0.000177622	0.0103169	NO
MSTRG.12572.4	Female	Male	-8.01981	3.1257	0.000143894	0.00882905	NO
MSTRG.12572.5	Female	Male	-5.88358	7.38491	1.94806e-05	0.00234014	NO
MSTRG.12572.7	Female	Male	-6.33636	6.93549	5.27768e-06	0.000912472	NO
MSTRG.12595.1	Female	Male	-3.15163	4.41041	0.00121978	0.0380293	NO
MSTRG.12595.2	Female	Male	-3.71026	3.30596	0.00118022	0.0371001	NO
MSTRG.12611.1	Female	Male	-6.0593	8.04171	3.04351e-06	0.000600148	NO
MSTRG.12634.1	Female	Male	1.99813	7.16508	1.60702e-05	0.00202238	NO
MSTRG.12636.1	Female	Male	-2.88375	4.26287	0.000250845	0.0130903	NO
MSTRG.1265.1	Female	Male	3.94523	0.981481	4.60449e-05	0.00416532	NO
MSTRG.1266.2	Female	Male	5.55687	3.78037	0.00147489	0.042968	NO
MSTRG.1266.4	Female	Male	11.5276	2.60483	3.41025e-12	3.94299e-09	NO
MSTRG.1266.7	Female	Male	11.2116	0.634565	1.11549e-05	0.00158131	NO
MSTRG.12667.1	Female	Male	-11.5504	10.0447	2.24173e-08	1.05255e-05	NO
MSTRG.12667.2	Female	Male	-8.47466	6.55114	6.85082e-08	2.75515e-05	NO
MSTRG.12667.3	Female	Male	-18.0299	7.43328	3.41899e-05	0.00345626	NO
MSTRG.12667.4	Female	Male	-12.6889	4.39472	2.24046e-05	0.00257437	NO
MSTRG.12700.10	Female	Male	5.94807	2.10286	0.000990291	0.0330386	NO
MSTRG.12700.18	Female	Male	6.50678	0.977906	0.00115878	0.0366662	NO
MSTRG.12700.6	Female	Male	6.76011	0.382286	0.00175558	0.0474797	NO
MSTRG.12703.1	Female	Male	-6.30945	3.24195	1.7793e-06	0.000394206	NO
MSTRG.12740.2	Female	Male	3.89755	2.58888	0.00164123	0.0455884	NO
MSTRG.1276.12	Female	Male	-10.4594	-0.105806	0.000404084	0.0180528	NO
MSTRG.1277.6	Female	Male	7.92605	-0.275276	0.000219091	0.0119208	NO
MSTRG.12780.2	Female	Male	5.30998	5.80347	1.38356e-10	1.19047e-07	NO
MSTRG.12844.5	Female	Male	-3.51747	0.990534	0.00131563	0.0399096	NO
MSTRG.12858.1	Female	Male	-4.83383	4.32193	0.000264487	0.0135349	NO
MSTRG.12866.3	Female	Male	-3.80024	2.65818	0.000169216	0.00998758	NO
MSTRG.12866.4	Female	Male	-5.36279	1.49407	0.000719278	0.0269904	NO
MSTRG.12915.4	Female	Male	-11.1099	0.533575	0.00153339	0.0436743	NO
MSTRG.12924.1	Female	Male	10.9394	3.97797	0.000799924	0.0290161	NO
MSTRG.12941.2	Female	Male	3.13065	1.75691	0.000649233	0.025419	NO
MSTRG.12941.4	Female	Male	10.9436	0.370952	0.00154654	0.0438135	NO
MSTRG.12958.3	Female	Male	-7.68234	3.1908	1.31302e-05	0.00178605	NO
MSTRG.12977.4	Female	Male	-5.26483	4.07999	0.000925675	0.0316535	NO
MSTRG.13010.1	Female	Male	-8.89107	3.06031	0.0001313	0.00839765	NO
MSTRG.13046.5	Female	Male	-7.51377	1.46491	0.000658363	0.0256678	NO
MSTRG.13054.2	Female	Male	-3.12052	3.13973	0.00153124	0.0436743	NO
MSTRG.13054.5	Female	Male	-3.37036	4.58434	0.00105674	0.0345191	NO
MSTRG.13065.3	Female	Male	15.2162	4.62067	0.00071067	0.0268016	NO
MSTRG.13065.5	Female	Male	15.887	5.29101	0.000550552	0.022558	NO
MSTRG.13076.8	Female	Male	-10.4808	-0.084704	0.00171865	0.0467955	NO
MSTRG.13093.1	Female	Male	6.93632	-0.293894	2.93123e-06	0.000592638	NO
MSTRG.13112.1	Female	Male	8.90314	0.0827019	7.27079e-10	5.38024e-07	NO
MSTRG.13142.5	Female	Male	3.88201	3.78665	0.00124881	0.0385683	NO
MSTRG.13159.8	Female	Male	-12.0981	1.51172	0.00109152	0.0351174	NO
MSTRG.13167.1	Female	Male	-11.8653	2.07723	0.00148418	0.043069	NO
MSTRG.13170.1	Female	Male	-7.06578	0.811636	0.00145606	0.0427222	NO
MSTRG.13171.3	Female	Male	-11.6671	1.08384	0.00101272	0.0335149	NO
MSTRG.13178.2	Female	Male	-4.23771	2.62689	3.32988e-05	0.00340337	NO
MSTRG.13182.1	Female	Male	-8.71384	1.77031	0.000876979	0.030679	NO
MSTRG.13187.21	Female	Male	10.2175	-0.34021	0.000323143	0.0153281	NO
MSTRG.13196.19	Female	Male	-9.86415	1.38845	0.000201538	0.011298	NO
MSTRG.13273.3	Female	Male	-14.4648	3.86995	1.03897e-06	0.000254574	NO
MSTRG.13322.1	Female	Male	-4.16871	-0.190329	0.000133483	0.00845243	NO
MSTRG.13361.9	Female	Male	-11.3868	0.806168	6.90679e-05	0.00551444	NO
MSTRG.13393.1	Female	Male	-11.5276	0.945378	0.000237966	0.0126866	NO
MSTRG.13393.2	Female	Male	-9.0101	1.63313	0.000459879	0.019808	NO
MSTRG.13431.1	Female	Male	-4.00369	6.32813	0.000184659	0.010642	NO
MSTRG.13459.8	Female	Male	10.1939	-0.362358	7.38535e-05	0.00577696	NO
MSTRG.13473.1	Female	Male	-5.2346	-1.05434	0.00175921	0.0475104	NO
MSTRG.13492.1	Female	Male	-6.79974	6.03171	1.23814e-06	0.000291782	NO
MSTRG.13503.1	Female	Male	7.72457	4.69456	6.1836e-18	2.07988e-14	NO
MSTRG.13559.12	Female	Male	-13.0283	2.43685	4.03346e-05	0.0038434	NO
MSTRG.13561.2	Female	Male	-1.6222	8.36591	0.00137863	0.0411355	NO
MSTRG.13567.1	Female	Male	-8.23477	0.671089	0.00122005	0.0380293	NO
MSTRG.13590.9	Female	Male	11.8548	1.27055	0.000330917	0.0156236	NO
MSTRG.13627.2	Female	Male	-4.77778	7.95374	0.000369097	0.0169854	NO
MSTRG.13666.1	Female	Male	10.9179	0.345209	0.000651613	0.0254315	NO
MSTRG.13678.1	Female	Male	-4.31863	7.45452	0.000106467	0.00735349	NO
MSTRG.13696.4	Female	Male	-6.82936	2.62994	0.000305194	0.0147816	NO
MSTRG.137.4	Female	Male	-12.3128	1.72459	0.00156846	0.0441249	NO
MSTRG.13703.1	Female	Male	-3.39575	0.731692	0.00106619	0.0346644	NO
MSTRG.13705.2	Female	Male	1.99103	8.10215	1.36467e-05	0.00179685	NO
MSTRG.13713.12	Female	Male	7.78026	0.769288	0.00149952	0.0431806	NO
MSTRG.13718.1	Female	Male	-4.96152	5.78038	0.00184057	0.0488869	NO
MSTRG.13718.2	Female	Male	-6.85673	4.33557	0.000957936	0.032371	NO
MSTRG.13718.6	Female	Male	-6.03529	0.47999	0.00159216	0.0446953	NO
MSTRG.13772.1	Female	Male	-3.91829	3.03459	0.00155029	0.043837	NO
MSTRG.13772.4	Female	Male	-3.9169	1.52547	0.00122301	0.0380311	NO
MSTRG.13779.2	Female	Male	-4.163	6.46616	6.69359e-06	0.0010987	NO
MSTRG.13791.2	Female	Male	-12.79	2.1995	5.08353e-05	0.004457	NO
MSTRG.13791.3	Female	Male	-11.8757	1.29081	0.000901171	0.0310538	NO
MSTRG.13817.1	Female	Male	3.09514	7.44656	2.19736e-06	0.000467242	NO
MSTRG.13893.2	Female	Male	-9.05883	1.32948	9.32981e-06	0.00140794	NO
MSTRG.13901.1	Female	Male	2.43203	0.272867	0.00133128	0.0400806	NO
MSTRG.1402.1	Female	Male	4.64106	3.66231	2.81235e-05	0.00305144	NO
MSTRG.14028.1	Female	Male	2.95408	5.08873	0.000418758	0.0184888	NO
MSTRG.1403.9	Female	Male	12.3906	1.80253	0.0010581	0.0345227	NO
MSTRG.14081.14	Female	Male	-12.3065	1.71853	0.00134493	0.0403193	NO
MSTRG.14081.28	Female	Male	-4.28668	-0.214634	0.00140965	0.0418586	NO
MSTRG.14101.1	Female	Male	-6.24196	4.51382	0.000683777	0.0261407	NO
MSTRG.14103.14	Female	Male	-4.24946	0.785026	0.00146793	0.0429005	NO
MSTRG.14103.9	Female	Male	-3.04693	3.3662	0.00147239	0.0429294	NO
MSTRG.14135.1	Female	Male	6.3663	8.29907	1.51681e-17	4.31695e-14	NO
MSTRG.14199.3	Female	Male	-3.62873	5.58966	0.00108164	0.0350093	NO
MSTRG.14264.1	Female	Male	-17.1153	6.51886	0.000203157	0.0113372	NO
MSTRG.14294.4	Female	Male	-8.71077	-0.140638	0.000133872	0.00845243	NO
MSTRG.14310.1	Female	Male	-4.0576	7.18399	3.37432e-05	0.00343129	NO
MSTRG.1434.121	Female	Male	-12.4479	3.19702	7.97163e-07	0.000202183	NO
MSTRG.14346.1	Female	Male	8.24787	1.83975	6.13368e-05	0.00507696	NO
MSTRG.14363.1	Female	Male	10.2645	-0.293783	9.77433e-09	5.24116e-06	NO
MSTRG.14371.2	Female	Male	-4.57834	3.917	5.93543e-05	0.00500239	NO
MSTRG.14400.1	Female	Male	-5.03516	4.43556	0.000110035	0.00748378	NO
MSTRG.14400.4	Female	Male	-7.79856	1.81093	0.000650208	0.0254282	NO
MSTRG.14447.1	Female	Male	-5.25526	6.31804	3.93587e-06	0.000746787	NO
MSTRG.14448.4	Female	Male	-5.59616	3.8211	1.68533e-05	0.00207161	NO
MSTRG.14466.1	Female	Male	-4.65164	0.351934	0.000455067	0.0197155	NO
MSTRG.14466.2	Female	Male	-6.54028	1.72976	0.000901227	0.0310538	NO
MSTRG.14466.3	Female	Male	-5.92676	1.30002	3.19085e-05	0.00331624	NO
MSTRG.14466.4	Female	Male	-5.51084	7.38019	0.000228769	0.0123206	NO
MSTRG.14480.1	Female	Male	-5.74453	8.18672	5.75159e-05	0.00486964	NO
MSTRG.14481.1	Female	Male	2.86058	2.54407	0.00161759	0.0452571	NO
MSTRG.14483.24	Female	Male	-12.997	2.40583	0.00166831	0.0460298	NO
MSTRG.14499.3	Female	Male	-5.00567	5.56639	1.65348e-05	0.00205984	NO
MSTRG.14501.1	Female	Male	-3.04396	7.99071	7.66194e-05	0.00588142	NO
MSTRG.14530.3	Female	Male	-2.01533	6.93692	0.00122136	0.0380311	NO
MSTRG.14530.4	Female	Male	-2.19177	5.18946	0.000843225	0.0300564	NO
MSTRG.14535.1	Female	Male	2.25227	8.35275	0.00121178	0.0379633	NO
MSTRG.14580.3	Female	Male	-13.5631	2.96989	3.04117e-08	1.33953e-05	NO
MSTRG.14580.4	Female	Male	-6.40554	4.78236	0.00100841	0.0334322	NO
MSTRG.14602.1	Female	Male	-2.93835	5.96678	0.000959165	0.032371	NO
MSTRG.14609.3	Female	Male	-11.2133	0.634798	3.84931e-05	0.00377916	NO
MSTRG.14668.3	Female	Male	9.58375	0.785533	0.00041191	0.0183332	NO
MSTRG.14673.1	Female	Male	-4.31867	7.26017	0.0002554	0.0132718	NO
MSTRG.14678.3	Female	Male	-3.69963	2.8945	0.00169641	0.04639	NO
MSTRG.14678.45	Female	Male	-4.18387	5.13244	7.86487e-06	0.00125428	NO
MSTRG.14709.1	Female	Male	-4.08877	4.26253	0.000300205	0.0146929	NO
MSTRG.14709.11	Female	Male	-6.1429	4.78022	1.6692e-06	0.000374295	NO
MSTRG.14709.12	Female	Male	-8.03527	1.77477	6.40053e-05	0.00523923	NO
MSTRG.14709.14	Female	Male	-9.29409	2.77444	0.000137262	0.00857963	NO
MSTRG.1472.5	Female	Male	-2.85062	6.43735	0.000138534	0.00861448	NO
MSTRG.14735.3	Female	Male	-3.44367	1.88257	0.00179798	0.0480314	NO
MSTRG.14735.5	Female	Male	-4.27749	3.07462	0.00161952	0.0452571	NO
MSTRG.14752.4	Female	Male	-6.80472	1.49646	0.000334688	0.0157444	NO
MSTRG.14793.4	Female	Male	-4.9477	1.39556	3.03061e-05	0.0032146	NO
MSTRG.14808.4	Female	Male	-3.9058	2.89503	0.000879533	0.030679	NO
MSTRG.14850.3	Female	Male	-10.2199	10.0359	0.000870534	0.0305793	NO
MSTRG.14850.5	Female	Male	-16.0859	5.48977	0.000227693	0.0122914	NO
MSTRG.14855.1	Female	Male	10.8955	0.324277	8.30794e-07	0.000208339	NO
MSTRG.14855.3	Female	Male	10.7009	0.132917	7.94483e-07	0.000202183	NO
MSTRG.1490.1	Female	Male	-4.60245	12.5378	1.19374e-05	0.00166388	NO
MSTRG.14904.1	Female	Male	-8.36496	7.89914	1.0129e-05	0.00148715	NO
MSTRG.1494.1	Female	Male	10.225	-0.332954	0.000172765	0.0101141	NO
MSTRG.15009.1	Female	Male	-3.07938	6.98969	0.000493036	0.0209104	NO
MSTRG.15027.6	Female	Male	11.9517	1.36756	0.000122722	0.00803782	NO
MSTRG.15055.15	Female	Male	-10.1615	0.940984	0.000244858	0.0128975	NO
MSTRG.15055.19	Female	Male	-10.8709	3.74257	0.000614953	0.0243832	NO
MSTRG.15055.26	Female	Male	-12.08	1.49318	0.000192311	0.0109804	NO
MSTRG.15091.1	Female	Male	-2.95614	1.45068	0.000825085	0.0295235	NO
MSTRG.15094.20	Female	Male	-12.221	1.63364	0.00118498	0.0372183	NO
MSTRG.15108.2	Female	Male	13.6094	3.01644	4.6243e-06	0.000838833	NO
MSTRG.15234.1	Female	Male	4.43524	4.77505	2.68166e-05	0.00294418	NO
MSTRG.1525.2	Female	Male	-4.12137	4.22734	0.00176912	0.0476042	NO
MSTRG.15256.1	Female	Male	-3.62973	7.54226	0.000272305	0.0137586	NO
MSTRG.15259.8	Female	Male	-3.31259	4.80924	0.000320929	0.0152596	NO
MSTRG.15271.1	Female	Male	-8.89812	4.58638	1.07143e-05	0.00154248	NO
MSTRG.15282.10	Female	Male	-15.058	4.4626	3.85112e-06	0.000734472	NO
MSTRG.15282.11	Female	Male	-12.3116	1.72307	0.000272612	0.0137586	NO
MSTRG.15282.2	Female	Male	-3.23048	7.54505	0.000341041	0.0159724	NO
MSTRG.15282.7	Female	Male	-11.7095	4.60409	0.000200488	0.0112562	NO
MSTRG.15282.8	Female	Male	-8.9075	2.31705	0.000787836	0.0286901	NO
MSTRG.15282.9	Female	Male	-14.4456	3.85083	3.02053e-06	0.000600148	NO
MSTRG.15293.1	Female	Male	6.95587	7.26767	4.34895e-13	6.43627e-10	NO
MSTRG.15304.1	Female	Male	-6.07746	3.45047	6.48496e-06	0.00108569	NO
MSTRG.15304.2	Female	Male	-8.36937	5.69306	8.57714e-06	0.00131679	NO
MSTRG.15353.1	Female	Male	-4.55368	2.7933	0.000377505	0.0172092	NO
MSTRG.15363.2	Female	Male	-5.14282	0.248076	0.00113072	0.0361147	NO
MSTRG.15422.3	Female	Male	-8.14464	3.01346	4.6475e-05	0.00417342	NO
MSTRG.1564.3	Female	Male	-4.48171	4.71701	0.0005176	0.0216882	NO
MSTRG.1620.1	Female	Male	4.65731	-0.0182697	6.42477e-05	0.00524746	NO
MSTRG.1638.63	Female	Male	9.16322	-1.35272	6.60076e-08	2.68375e-05	NO
MSTRG.1671.4	Female	Male	7.50644	-1.0193	5.37714e-05	0.00461598	NO
MSTRG.1710.1	Female	Male	-3.88834	3.73235	0.000347316	0.0162047	NO
MSTRG.1757.1	Female	Male	-4.25022	4.72371	0.000678803	0.0260415	NO
MSTRG.1765.1	Female	Male	-1.8815	6.97349	0.000806308	0.0291162	NO
MSTRG.1801.2	Female	Male	-6.00634	2.63331	0.000700071	0.0265202	NO
MSTRG.1801.4	Female	Male	-3.93268	3.66742	0.000964726	0.0323901	NO
MSTRG.187.1	Female	Male	-12.083	1.49616	0.00032097	0.0152596	NO
MSTRG.187.2	Female	Male	-11.56	0.977941	0.000237043	0.0126739	NO
MSTRG.1871.34	Female	Male	-9.38548	0.150536	0.00148131	0.0430634	NO
MSTRG.1890.1	Female	Male	-3.53144	2.01836	0.000567123	0.0229825	NO
MSTRG.1897.122	Female	Male	-10.8811	0.30759	0.000247195	0.0129636	NO
MSTRG.1898.1	Female	Male	10.3324	-0.227682	1.20216e-08	6.17761e-06	NO
MSTRG.1898.3	Female	Male	-7.27081	1.64261	0.000383511	0.0173462	NO
MSTRG.1937.43	Female	Male	11.2567	0.679867	4.04088e-05	0.0038434	NO
MSTRG.1944.23	Female	Male	-5.6769	0.344267	4.67267e-05	0.00417342	NO
MSTRG.2016.1	Female	Male	-6.55485	3.79313	0.00142474	0.0421038	NO
MSTRG.2027.4	Female	Male	13.6477	3.05457	6.71115e-06	0.0010987	NO
MSTRG.208.5	Female	Male	-10.077	2.89378	0.00125446	0.0386058	NO
MSTRG.2255.3	Female	Male	-4.58926	1.18599	0.000255873	0.0132778	NO
MSTRG.2255.5	Female	Male	-9.71522	0.533082	8.26055e-05	0.00617439	NO
MSTRG.2257.2	Female	Male	2.70583	4.82639	0.00115355	0.0366254	NO
MSTRG.2334.2	Female	Male	5.181	5.82662	3.15576e-08	1.37364e-05	NO
MSTRG.2345.1	Female	Male	-13.5331	4.29917	1.04938e-05	0.00152858	NO
MSTRG.2347.1	Female	Male	4.81792	2.97321	7.1815e-05	0.00565337	NO
MSTRG.2347.2	Female	Male	-3.82369	7.86764	6.88103e-07	0.000180561	NO
MSTRG.2373.14	Female	Male	10.9756	0.402375	0.000237877	0.0126866	NO
MSTRG.2373.28	Female	Male	10.0278	1.05512	0.00169527	0.04639	NO
MSTRG.2373.7	Female	Male	-12.412	1.82341	0.000750735	0.0278169	NO
MSTRG.238.1	Female	Male	6.61709	4.69567	1.25371e-07	4.63859e-05	NO
MSTRG.238.2	Female	Male	9.74833	-0.793649	2.90886e-06	0.000592638	NO
MSTRG.240.38	Female	Male	-17.4129	6.81638	3.93498e-07	0.000113833	NO
MSTRG.2402.1	Female	Male	-10.3796	5.58994	3.29009e-05	0.00339532	NO
MSTRG.2402.3	Female	Male	-10.9135	0.338273	5.35574e-08	2.25178e-05	NO
MSTRG.2441.1	Female	Male	2.40921	5.9443	0.000412485	0.0183332	NO
MSTRG.2462.3	Female	Male	11.3619	0.782466	0.00164897	0.0457137	NO
MSTRG.2463.1	Female	Male	8.95894	-1.54166	0.00167503	0.0461199	NO
MSTRG.2526.2	Female	Male	5.94497	2.60211	7.84156e-05	0.00594118	NO
MSTRG.2531.13	Female	Male	-5.1736	5.29841	0.000109006	0.00744113	NO
MSTRG.2531.16	Female	Male	-4.75598	3.95162	3.90026e-05	0.00377916	NO
MSTRG.2531.4	Female	Male	-15.5054	4.90957	0.00085409	0.0302687	NO
MSTRG.2531.8	Female	Male	-5.34431	4.52392	0.00081253	0.0291872	NO
MSTRG.2531.9	Female	Male	-5.71627	4.50307	3.03312e-05	0.0032146	NO
MSTRG.2542.1	Female	Male	-4.93424	1.28491	0.000240773	0.012781	NO
MSTRG.2558.2	Female	Male	4.75936	2.47413	2.91586e-06	0.000592638	NO
MSTRG.2574.2	Female	Male	6.83243	-1.38246	0.00186218	0.0492838	NO
MSTRG.2576.11	Female	Male	11.6328	1.05112	5.11038e-05	0.00446995	NO
MSTRG.2583.1	Female	Male	9.00334	-1.50126	0.000241719	0.0127945	NO
MSTRG.2589.1	Female	Male	6.64253	1.39366	0.00133353	0.0400806	NO
MSTRG.2591.16	Female	Male	8.06317	1.26426	0.000111661	0.00753898	NO
MSTRG.2592.1	Female	Male	5.83628	3.7599	0.00156666	0.0441132	NO
MSTRG.2638.11	Female	Male	10.694	0.125884	2.2474e-08	1.05255e-05	NO
MSTRG.2638.5	Female	Male	10.3516	-0.209025	2.42657e-07	7.67355e-05	NO
MSTRG.2652.7	Female	Male	-4.2821	6.49723	0.000155391	0.00937895	NO
MSTRG.2659.1	Female	Male	-4.04778	6.85737	7.52304e-05	0.00585415	NO
MSTRG.2659.2	Female	Male	-4.2576	6.38113	4.28963e-08	1.82428e-05	NO
MSTRG.2680.2	Female	Male	-7.82283	4.53911	0.000562824	0.0228943	NO
MSTRG.2692.6	Female	Male	2.64188	4.083	0.00163748	0.0455632	NO
MSTRG.2783.6	Female	Male	16.1483	5.55221	1.52366e-36	5.6374e-32	NO
MSTRG.2808.1	Female	Male	-16.2791	5.68288	0.000115314	0.00771315	NO
MSTRG.2814.10	Female	Male	8.65811	-0.126029	0.00078148	0.0285429	NO
MSTRG.2843.10	Female	Male	6.89313	7.25196	0.00147981	0.0430634	NO
MSTRG.2843.4	Female	Male	17.1266	6.53018	4.89988e-06	0.00086436	NO
MSTRG.2897.3	Female	Male	-4.82343	4.3554	0.000239646	0.0127394	NO
MSTRG.2916.26	Female	Male	-9.82897	2.36632	3.00425e-06	0.000600148	NO
MSTRG.2923.7	Female	Male	5.50555	0.029358	0.00124335	0.0384638	NO
MSTRG.2923.9	Female	Male	8.13996	-0.792218	8.68458e-05	0.00640081	NO
MSTRG.2926.1	Female	Male	5.62412	5.16227	2.36555e-10	1.94496e-07	NO
MSTRG.2952.3	Female	Male	-3.88032	6.24851	0.000684623	0.0261407	NO
MSTRG.2993.3	Female	Male	-8.28511	-0.176942	1.73959e-07	5.74669e-05	NO
MSTRG.3009.12	Female	Male	2.81795	3.65673	0.00171883	0.0467955	NO
MSTRG.3009.3	Female	Male	-4.09719	0.588593	9.48999e-06	0.00141112	NO
MSTRG.3049.1	Female	Male	9.64242	1.27231	0.000957876	0.032371	NO
MSTRG.3053.4	Female	Male	14.1943	3.60003	0.00149296	0.0431548	NO
MSTRG.316.2	Female	Male	-4.08404	4.82896	0.00153416	0.0436743	NO
MSTRG.3259.1	Female	Male	8.81198	-0.0163787	3.83636e-07	0.000112652	NO
MSTRG.3321.1	Female	Male	5.82643	-0.235459	2.6036e-05	0.00288388	NO
MSTRG.3393.3	Female	Male	9.06965	-1.43869	0.00096139	0.032371	NO
MSTRG.34.1	Female	Male	-7.08312	6.46557	3.04948e-06	0.000600148	NO
MSTRG.3420.1	Female	Male	5.12329	5.09438	5.54551e-06	0.0009499	NO
MSTRG.3430.1	Female	Male	-6.68898	5.31442	9.03544e-08	3.51897e-05	NO
MSTRG.3438.1	Female	Male	-13.3937	2.80099	0.000563263	0.0228943	NO
MSTRG.3450.1	Female	Male	12.9188	5.15518	0.000109688	0.00747395	NO
MSTRG.3450.4	Female	Male	-3.90624	5.64029	1.14247e-05	0.00161337	NO
MSTRG.3450.7	Female	Male	-5.16059	2.10731	0.00121515	0.0379654	NO
MSTRG.3453.1	Female	Male	-3.85236	9.48986	0.000713111	0.0268016	NO
MSTRG.3463.15	Female	Male	6.30971	3.24133	0.00019767	0.0111854	NO
MSTRG.3463.3	Female	Male	14.4661	3.87158	0.00150084	0.0431806	NO
MSTRG.3463.6	Female	Male	13.0498	2.45905	0.000143554	0.00882283	NO
MSTRG.3466.1	Female	Male	9.15934	1.00932	8.43834e-05	0.0062819	NO
MSTRG.3486.1	Female	Male	-2.61746	2.91195	0.00176639	0.0475999	NO
MSTRG.35.7	Female	Male	13.9193	3.32568	1.67576e-05	0.00206798	NO
MSTRG.3545.1	Female	Male	-3.64338	4.95197	0.000372223	0.0170655	NO
MSTRG.3552.2	Female	Male	-5.70918	0.992853	0.00188996	0.0497867	NO
MSTRG.3633.1	Female	Male	1.74692	5.48899	0.00043149	0.0189155	NO
MSTRG.3681.1	Female	Male	1.89949	6.91856	9.33989e-05	0.00672308	NO
MSTRG.3685.3	Female	Male	-12.7725	2.18216	0.00107998	0.0350093	NO
MSTRG.3722.1	Female	Male	-2.25684	7.845	0.00129634	0.0394759	NO
MSTRG.3740.3	Female	Male	-5.64232	2.23762	0.000206281	0.0114597	NO
MSTRG.3748.1	Female	Male	-4.72292	6.37833	0.000261852	0.0134934	NO
MSTRG.3748.2	Female	Male	-15.6267	5.0308	2.40018e-07	7.65554e-05	NO
MSTRG.382.1	Female	Male	-10.0861	8.70515	1.72648e-07	5.74669e-05	NO
MSTRG.3883.2	Female	Male	-5.72188	6.975	1.63917e-06	0.000369804	NO
MSTRG.3889.10	Female	Male	-12.3929	1.80432	1.06108e-05	0.00153956	NO
MSTRG.3889.8	Female	Male	-6.01764	3.58914	1.45077e-05	0.0018834	NO
MSTRG.3889.9	Female	Male	-12.6142	2.0245	0.000661058	0.0256917	NO
MSTRG.3906.1	Female	Male	14.6743	4.07937	2.01389e-17	5.32228e-14	NO
MSTRG.392.1	Female	Male	4.85901	2.08952	0.00016877	0.00998758	NO
MSTRG.3930.2	Female	Male	14.7594	4.16439	0.000693783	0.0263816	NO
MSTRG.3935.2	Female	Male	-4.29068	5.56551	0.000573858	0.023124	NO
MSTRG.3985.1	Female	Male	1.64075	7.53933	0.000253825	0.0132271	NO
MSTRG.3997.1	Female	Male	-12.1528	4.41126	0.000632604	0.0249794	NO
MSTRG.4010.2	Female	Male	-4.26695	3.64572	0.00108806	0.0350993	NO
MSTRG.4010.3	Female	Male	-3.52077	2.96256	0.000256456	0.0132894	NO
MSTRG.4013.14	Female	Male	-10.7928	0.220624	0.00173942	0.0471825	NO
MSTRG.4029.1	Female	Male	-2.49565	6.00744	0.00117869	0.0370835	NO
MSTRG.4034.3	Female	Male	7.56574	0.0660367	0.000254498	0.0132436	NO
MSTRG.4061.1	Female	Male	-7.58709	-0.436898	0.000164468	0.00976748	NO
MSTRG.413.1	Female	Male	-10.6807	3.00851	0.00128103	0.0392674	NO
MSTRG.4151.1	Female	Male	6.06991	0.778851	0.00030763	0.014859	NO
MSTRG.4238.5	Female	Male	12.4576	1.86971	3.56941e-05	0.0035597	NO
MSTRG.4255.1	Female	Male	-2.72317	5.86913	0.00155751	0.0439141	NO
MSTRG.4316.1	Female	Male	-9.77941	-0.770277	1.45958e-06	0.00033752	NO
MSTRG.4425.2	Female	Male	-6.64491	3.02176	0.00112402	0.0359442	NO
MSTRG.4425.4	Female	Male	-7.35732	6.61733	0.00123231	0.0382502	NO
MSTRG.4431.5	Female	Male	-9.21682	6.31178	7.73863e-06	0.00123949	NO
MSTRG.4437.1	Female	Male	-2.97034	3.91991	0.00178841	0.0478714	NO
MSTRG.4476.4	Female	Male	-3.78662	4.91794	0.000138403	0.00861448	NO
MSTRG.4482.10	Female	Male	13.8663	3.2729	0.00182555	0.0486274	NO
MSTRG.4482.2	Female	Male	14.2946	3.70033	0.00132882	0.0400693	NO
MSTRG.4513.1	Female	Male	-4.92078	9.50568	0.000191749	0.0109653	NO
MSTRG.4520.1	Female	Male	4.69376	1.75674	0.00147074	0.0429294	NO
MSTRG.4544.5	Female	Male	-4.07378	0.504844	0.00185347	0.0491237	NO
MSTRG.4559.1	Female	Male	-8.95173	7.80185	1.10623e-11	1.1062e-08	NO
MSTRG.457.4	Female	Male	4.30271	8.06188	7.56268e-13	9.99327e-10	NO
MSTRG.4591.1	Female	Male	-4.74416	2.49013	0.000101419	0.00710685	NO
MSTRG.4636.2	Female	Male	12.479	1.89064	0.00122429	0.038033	NO
MSTRG.4668.55	Female	Male	12.2624	1.67572	3.90183e-05	0.00377916	NO
MSTRG.4668.56	Female	Male	12.7294	2.13982	5.60742e-05	0.00475846	NO
MSTRG.4687.1	Female	Male	-2.4784	6.06331	0.000481963	0.0205677	NO
MSTRG.4705.1	Female	Male	-2.52504	6.17601	0.000302265	0.0147345	NO
MSTRG.4721.1	Female	Male	-2.25977	6.31691	0.00150301	0.0431806	NO
MSTRG.4751.2	Female	Male	-3.18054	2.15262	0.00162212	0.0452957	NO
MSTRG.4752.1	Female	Male	-2.70509	6.70803	0.000859394	0.0303693	NO
MSTRG.4753.1	Female	Male	12.2194	1.63243	6.12942e-05	0.00507696	NO
MSTRG.4753.5	Female	Male	8.69634	0.437115	0.000349211	0.0162521	NO
MSTRG.4783.3	Female	Male	-13.1956	2.60346	9.50127e-05	0.00681274	NO
MSTRG.4809.15	Female	Male	10.8296	0.258875	0.000231779	0.0124464	NO
MSTRG.4809.4	Female	Male	4.5406	1.42939	0.0017083	0.0466117	NO
MSTRG.4817.4	Female	Male	12.8764	2.28596	1.12432e-07	4.24478e-05	NO
MSTRG.4823.4	Female	Male	-13.8293	4.68133	0.000929796	0.0317357	NO
MSTRG.4833.1	Female	Male	-9.58187	7.61971	0.00064705	0.0253604	NO
MSTRG.4842.6	Female	Male	12.923	2.33222	9.13044e-05	0.00659799	NO
MSTRG.4847.3	Female	Male	-4.02368	3.7771	8.59215e-05	0.00637076	NO
MSTRG.4847.4	Female	Male	-4.22097	1.59259	0.000676558	0.0260415	NO
MSTRG.4857.7	Female	Male	-5.02443	4.19843	0.000159428	0.00955054	NO
MSTRG.4873.1	Female	Male	6.32406	0.05812	4.67842e-06	0.000844375	NO
MSTRG.4909.1	Female	Male	-2.69321	6.20234	4.45766e-05	0.0040692	NO
MSTRG.491.1	Female	Male	4.25175	1.49199	0.00155093	0.043837	NO
MSTRG.4914.6	Female	Male	15.7497	5.15385	1.6823e-06	0.00037496	NO
MSTRG.4920.3	Female	Male	-14.416	3.82128	0.00140964	0.0418586	NO
MSTRG.4928.1	Female	Male	-2.92856	7.49819	0.00053823	0.0223251	NO
MSTRG.4935.1	Female	Male	5.77634	7.00379	1.59082e-11	1.54891e-08	NO
MSTRG.4960.1	Female	Male	-11.4243	0.843739	0.00107576	0.0349446	NO
MSTRG.4964.3	Female	Male	10.0824	-0.470103	0.000122306	0.00803764	NO
MSTRG.4972.2	Female	Male	-9.44106	2.48019	6.29314e-05	0.00516275	NO
MSTRG.4993.1	Female	Male	2.28503	6.55602	0.00116481	0.036766	NO
MSTRG.5035.1	Female	Male	-9.49935	1.88853	0.000526865	0.0220017	NO
MSTRG.5066.1	Female	Male	-1.94274	7.93056	0.00176809	0.0476042	NO
MSTRG.5067.3	Female	Male	1.62406	9.65713	0.0017848	0.047852	NO
MSTRG.5075.3	Female	Male	-2.68659	6.2294	0.000158669	0.00953016	NO
MSTRG.5075.4	Female	Male	-2.70567	5.55363	0.000370044	0.0169867	NO
MSTRG.5075.5	Female	Male	-3.06618	6.29033	0.00015367	0.00929028	NO
MSTRG.5077.8	Female	Male	12.7268	2.13727	0.00186702	0.0493412	NO
MSTRG.5089.2	Female	Male	-2.41104	6.11916	0.000827024	0.0295643	NO
MSTRG.5129.10	Female	Male	-12.6452	3.74663	0.000109003	0.00744113	NO
MSTRG.5146.1	Female	Male	-4.61502	3.70352	1.59473e-05	0.00201377	NO
MSTRG.5150.1	Female	Male	-2.73693	5.21733	0.00165876	0.0458004	NO
MSTRG.5175.5	Female	Male	-3.7169	6.41273	0.00130709	0.0397706	NO
MSTRG.5186.1	Female	Male	-2.76776	4.64266	0.000429116	0.0188338	NO
MSTRG.5204.1	Female	Male	8.76847	4.39207	7.73671e-05	0.00591427	NO
MSTRG.5214.1	Female	Male	-8.54797	0.622531	0.00154878	0.043837	NO
MSTRG.5219.4	Female	Male	-12.266	1.67834	0.000241555	0.0127945	NO
MSTRG.5230.17	Female	Male	-13.1708	2.57886	0.000541413	0.02234	NO
MSTRG.5261.42	Female	Male	-4.55993	1.51693	0.000273975	0.0137916	NO
MSTRG.5327.2	Female	Male	10.7624	0.194911	0.00114785	0.0364857	NO
MSTRG.5327.4	Female	Male	12.6295	2.04032	2.90491e-05	0.00312993	NO
MSTRG.5350.1	Female	Male	-4.94662	1.12588	0.000546956	0.0224355	NO
MSTRG.5353.1	Female	Male	-2.35373	8.31731	3.16079e-05	0.00330356	NO
MSTRG.5355.1	Female	Male	-3.61164	8.62061	3.01265e-05	0.00321225	NO
MSTRG.5368.10	Female	Male	-6.4884	2.51985	0.000809078	0.0291162	NO
MSTRG.5396.1	Female	Male	-2.87031	3.91287	0.000923967	0.0316243	NO
MSTRG.5496.2	Female	Male	-5.49788	1.38452	0.000103172	0.00718879	NO
MSTRG.5496.6	Female	Male	-6.84449	1.41683	0.000369599	0.0169867	NO
MSTRG.5502.1	Female	Male	7.80035	1.40614	0.000202986	0.0113372	NO
MSTRG.5554.4	Female	Male	16.1591	5.56305	1.68391e-15	3.66487e-12	NO
MSTRG.563.1	Female	Male	11.2781	0.701003	0.00017792	0.010318	NO
MSTRG.563.2	Female	Male	11.3055	0.7278	1.35605e-07	4.96757e-05	NO
MSTRG.566.4	Female	Male	-6.92821	1.5013	0.000117563	0.00780915	NO
MSTRG.5733.1	Female	Male	3.98695	1.65691	0.00177546	0.0476706	NO
MSTRG.5736.1	Female	Male	-2.57549	5.04321	0.000291904	0.0143863	NO
MSTRG.5736.11	Female	Male	-5.52051	1.6602	0.000848657	0.0301338	NO
MSTRG.5736.15	Female	Male	-4.63464	0.482146	0.00139866	0.041599	NO
MSTRG.5736.7	Female	Male	-3.65145	0.613167	0.000332773	0.0156844	NO
MSTRG.5736.8	Female	Male	-6.18451	1.6729	0.000398578	0.0178535	NO
MSTRG.5755.10	Female	Male	11.2335	0.656375	3.77159e-05	0.00374115	NO
MSTRG.5807.13	Female	Male	-11.066	0.489312	0.000150657	0.00913796	NO
MSTRG.5807.16	Female	Male	-13.996	3.4018	7.52078e-15	1.32505e-11	NO
MSTRG.5852.1	Female	Male	-9.67666	-0.867471	0.000283107	0.0140978	NO
MSTRG.5852.4	Female	Male	-9.87366	-0.67727	0.000295355	0.0145317	NO
MSTRG.5862.4	Female	Male	7.81522	0.488844	0.00100502	0.0333495	NO
MSTRG.587.2	Female	Male	-12.676	2.08509	0.000110952	0.00751852	NO
MSTRG.5926.1	Female	Male	2.89557	7.5785	1.34799e-05	0.00179685	NO
MSTRG.5928.1	Female	Male	-8.1645	0.659916	1.70002e-07	5.7181e-05	NO
MSTRG.5980.1	Female	Male	-2.38289	6.91584	0.000936097	0.0318626	NO
MSTRG.600.4	Female	Male	-11.8272	1.24182	7.64473e-12	8.31904e-09	NO
MSTRG.6000.2	Female	Male	13.7462	3.15292	0.00153454	0.0436743	NO
MSTRG.6017.1	Female	Male	1.75616	6.44855	0.00011133	0.00753032	NO
MSTRG.6091.1	Female	Male	-4.04099	3.35614	0.000753355	0.0278734	NO
MSTRG.6097.1	Female	Male	-2.84716	4.71527	8.86946e-05	0.00648562	NO
MSTRG.611.1	Female	Male	11.171	0.594559	0.000681519	0.026103	NO
MSTRG.6139.1	Female	Male	-2.74522	7.21133	0.000906972	0.0311736	NO
MSTRG.6151.1	Female	Male	5.4484	3.47374	3.90259e-08	1.67897e-05	NO
MSTRG.6154.1	Female	Male	-4.20525	9.14319	0.00142413	0.0421038	NO
MSTRG.6182.1	Female	Male	5.31877	3.50865	5.96555e-07	0.000161109	NO
MSTRG.62.1	Female	Male	3.82495	-0.164899	1.31286e-05	0.00178605	NO
MSTRG.6206.7	Female	Male	12.3465	1.75893	3.0583e-05	0.0032146	NO
MSTRG.6227.1	Female	Male	5.831	3.24748	5.78736e-07	0.000157446	NO
MSTRG.6243.1	Female	Male	-3.45769	5.72856	0.0006464	0.0253604	NO
MSTRG.6252.4	Female	Male	-7.23532	8.26391	0.000219086	0.0119208	NO
MSTRG.6256.3	Female	Male	5.51003	2.73325	0.000485895	0.0207116	NO
MSTRG.6269.1	Female	Male	6.41674	6.65254	1.35286e-19	5.00543e-16	NO
MSTRG.6269.2	Female	Male	6.1935	7.20917	4.94174e-21	2.28549e-17	NO
MSTRG.6269.4	Female	Male	9.63833	5.19551	2.43054e-06	0.000508066	NO
MSTRG.6270.1	Female	Male	8.56531	3.91341	2.66463e-07	8.28477e-05	NO
MSTRG.6280.1	Female	Male	8.48952	2.92846	9.52999e-05	0.00682012	NO
MSTRG.6299.8	Female	Male	-3.03184	7.82708	0.00189169	0.0497867	NO
MSTRG.6301.1	Female	Male	-11.6475	1.06448	0.00144989	0.042575	NO
MSTRG.6302.4	Female	Male	-3.05764	3.93328	0.0016793	0.0461608	NO
MSTRG.6311.2	Female	Male	11.1814	4.12373	4.6924e-05	0.00417342	NO
MSTRG.6332.1	Female	Male	-5.26936	6.73061	0.00021518	0.0118651	NO
MSTRG.6333.1	Female	Male	-3.83764	4.24933	0.000106529	0.00735349	NO
MSTRG.6361.3	Female	Male	-9.08007	4.20819	0.00029653	0.0145508	NO
MSTRG.6361.4	Female	Male	-14.8056	4.21035	0.000227142	0.0122866	NO
MSTRG.6422.48	Female	Male	3.35444	2.86241	0.00165328	0.0457393	NO
MSTRG.6434.1	Female	Male	9.25268	1.71828	0.0013761	0.0410932	NO
MSTRG.6445.1	Female	Male	4.63471	1.33588	3.43852e-05	0.00346582	NO
MSTRG.6446.1	Female	Male	4.25495	3.83306	1.83535e-06	0.000404203	NO
MSTRG.6465.6	Female	Male	12.0263	1.4413	4.23943e-05	0.00393119	NO
MSTRG.6475.3	Female	Male	-11.9048	1.31941	0.00142011	0.0420679	NO
MSTRG.6477.12	Female	Male	-12.1857	1.59834	0.000991691	0.0330555	NO
MSTRG.6520.1	Female	Male	6.57349	4.48615	8.44284e-06	0.00131599	NO
MSTRG.6523.1	Female	Male	7.90103	10.6994	6.70208e-06	0.0010987	NO
MSTRG.6552.14	Female	Male	-7.59238	-0.610422	0.00139736	0.0415936	NO
MSTRG.6584.16	Female	Male	-13.3218	2.72807	0.00033106	0.0156236	NO
MSTRG.6590.1	Female	Male	6.3149	2.48001	0.000108757	0.00744113	NO
MSTRG.6595.5	Female	Male	-13.4855	2.89198	0.000957993	0.032371	NO
MSTRG.6595.6	Female	Male	-11.3702	4.71645	4.23267e-05	0.00393119	NO
MSTRG.66.5	Female	Male	-5.06439	0.0664265	0.000907428	0.0311736	NO
MSTRG.6625.16	Female	Male	-13.9882	3.39421	0.00109124	0.0351174	NO
MSTRG.6725.1	Female	Male	-6.25041	9.80783	7.83464e-10	5.6838e-07	NO
MSTRG.6725.2	Female	Male	-17.4871	6.89059	8.86976e-05	0.00648562	NO
MSTRG.6755.1	Female	Male	-9.67206	0.0240188	3.60153e-06	0.00069043	NO
MSTRG.6788.2	Female	Male	-11.8685	1.28338	0.00157932	0.0443684	NO
MSTRG.6788.5	Female	Male	-6.32405	4.41176	0.000122743	0.00803782	NO
MSTRG.6799.14	Female	Male	4.21102	5.4843	2.76324e-05	0.00300697	NO
MSTRG.6799.2	Female	Male	2.0978	5.76861	0.00132872	0.0400693	NO
MSTRG.6799.22	Female	Male	4.75783	4.9139	0.000247366	0.0129636	NO
MSTRG.6799.28	Female	Male	3.03692	2.81669	0.00150478	0.0431806	NO
MSTRG.6799.29	Female	Male	11.4737	0.894217	9.77456e-05	0.00692814	NO
MSTRG.6799.34	Female	Male	-13.4516	2.85819	0.00169791	0.0463966	NO
MSTRG.6799.54	Female	Male	6.81044	2.34677	0.000190444	0.0109075	NO
MSTRG.6799.6	Female	Male	5.73448	5.32708	0.000246953	0.0129636	NO
MSTRG.6799.7	Female	Male	3.6853	5.76741	0.000127453	0.00827304	NO
MSTRG.6799.75	Female	Male	3.77238	0.432842	0.00116561	0.036766	NO
MSTRG.6808.104	Female	Male	8.38111	1.54899	2.35914e-07	7.59008e-05	NO
MSTRG.6840.11	Female	Male	11.1388	0.562895	4.29577e-05	0.00397348	NO
MSTRG.6840.12	Female	Male	12.1315	3.16376	1.66794e-05	0.00206798	NO
MSTRG.6840.13	Female	Male	3.5546	3.05529	9.3644e-05	0.00672764	NO
MSTRG.6840.14	Female	Male	12.7	2.11029	3.13343e-05	0.00328424	NO
MSTRG.6844.2	Female	Male	14.3686	3.77416	1.01065e-20	4.15479e-17	NO
MSTRG.6899.5	Female	Male	9.94095	-0.609148	0.0010328	0.0339287	NO
MSTRG.6902.82	Female	Male	10.9823	0.409149	0.00153873	0.0437524	NO
MSTRG.6969.1	Female	Male	-5.77585	5.53436	9.84059e-05	0.00693987	NO
MSTRG.7010.1	Female	Male	-3.28827	4.73503	0.000555742	0.0227203	NO
MSTRG.7029.3	Female	Male	-5.62391	1.86387	9.58101e-05	0.00683021	NO
MSTRG.7046.4	Female	Male	2.39306	6.50755	2.32023e-06	0.000490549	NO
MSTRG.7051.1	Female	Male	-8.76753	6.92826	1.16459e-08	6.06881e-06	NO
MSTRG.7054.2	Female	Male	-14.1362	3.54191	0.000404532	0.0180528	NO
MSTRG.7064.1	Female	Male	-11.8755	1.29043	0.00102313	0.0337907	NO
MSTRG.7073.16	Female	Male	7.44442	1.66998	0.000768225	0.028254	NO
MSTRG.7103.1	Female	Male	2.62405	5.4768	8.88747e-05	0.00648575	NO
MSTRG.7138.5	Female	Male	-5.49688	4.10746	0.000639084	0.0251815	NO
MSTRG.7139.1	Female	Male	3.21761	2.74636	0.000136947	0.00857963	NO
MSTRG.7147.1	Female	Male	-1.98887	6.71916	0.000270023	0.0136963	NO
MSTRG.7179.1	Female	Male	-4.25822	5.66212	0.000587677	0.0235574	NO
MSTRG.7179.14	Female	Male	-8.80747	4.4587	7.1225e-05	0.00564564	NO
MSTRG.7179.19	Female	Male	-5.85087	2.642	4.09751e-06	0.000773489	NO
MSTRG.7216.2	Female	Male	14.3495	3.75504	0.000822032	0.0294428	NO
MSTRG.7216.5	Female	Male	-4.08763	2.70401	6.95001e-06	0.00111801	NO
MSTRG.7251.3	Female	Male	4.78352	3.08385	0.00185191	0.0491175	NO
MSTRG.7295.7	Female	Male	16.0842	5.48816	0.000457544	0.0197696	NO
MSTRG.7314.8	Female	Male	2.48646	3.10879	0.00162756	0.0453791	NO
MSTRG.7338.2	Female	Male	13.7346	3.14124	0.00056922	0.0230343	NO
MSTRG.7362.21	Female	Male	-11.3219	0.742109	0.00149516	0.0431806	NO
MSTRG.7368.5	Female	Male	-4.1766	2.99201	0.00138119	0.0411785	NO
MSTRG.7370.13	Female	Male	9.41965	2.16349	0.000542435	0.02234	NO
MSTRG.7394.39	Female	Male	-7.07655	0.884939	0.00101211	0.0335149	NO
MSTRG.740.2	Female	Male	13.2212	2.62953	0.00176168	0.0475423	NO
MSTRG.7404.3	Female	Male	-8.26835	2.27254	0.00125524	0.0386058	NO
MSTRG.7411.3	Female	Male	11.1244	0.548478	0.000176801	0.0103015	NO
MSTRG.7428.1	Female	Male	1.93877	4.98996	0.000994307	0.0331128	NO
MSTRG.7440.1	Female	Male	2.78461	4.57629	7.30189e-05	0.00573594	NO
MSTRG.7443.1	Female	Male	4.53897	4.09929	4.28193e-06	0.000796115	NO
MSTRG.7446.14	Female	Male	-3.11592	3.662	0.00128996	0.039444	NO
MSTRG.7464.2	Female	Male	-9.66368	3.18319	0.000765416	0.0282068	NO
MSTRG.7537.1	Female	Male	4.06822	8.45042	0.000219415	0.0119209	NO
MSTRG.7537.4	Female	Male	4.14386	8.66176	0.000539578	0.0223339	NO
MSTRG.7563.1	Female	Male	6.09603	3.14909	0.000275378	0.0138434	NO
MSTRG.7563.2	Female	Male	5.07967	3.37204	0.00026369	0.0135316	NO
MSTRG.7586.29	Female	Male	7.19184	1.30185	5.3716e-05	0.00461598	NO
MSTRG.7646.50	Female	Male	-2.53592	4.4837	0.000921836	0.0315806	NO
MSTRG.7663.1	Female	Male	11.4675	0.88751	2.93799e-09	1.75327e-06	NO
MSTRG.770.1	Female	Male	-5.89367	3.26475	3.05321e-05	0.0032146	NO
MSTRG.7709.3	Female	Male	5.79639	-1.32241	0.000418309	0.0184888	NO
MSTRG.7716.1	Female	Male	-4.19242	4.1856	0.0015291	0.0436536	NO
MSTRG.7794.10	Female	Male	-11.634	1.05121	0.00106333	0.0346016	NO
MSTRG.7823.1	Female	Male	11.5342	0.953643	1.06657e-08	5.63746e-06	NO
MSTRG.7825.1	Female	Male	-6.86094	3.22769	0.000319731	0.0152596	NO
MSTRG.7862.2	Female	Male	-3.35109	1.09514	0.0013243	0.0400636	NO
MSTRG.7930.1	Female	Male	3.83532	0.732741	0.00103348	0.0339287	NO
MSTRG.7931.3	Female	Male	10.462	-0.100134	3.40131e-05	0.00344781	NO
MSTRG.7931.5	Female	Male	7.49947	-1.41786	0.00129403	0.0394705	NO
MSTRG.7931.8	Female	Male	7.1278	-0.152396	0.000238624	0.0127034	NO
MSTRG.7932.1	Female	Male	7.65741	-1.2191	0.000216911	0.0118896	NO
MSTRG.7933.1	Female	Male	5.49735	-1.09549	0.00149095	0.0431304	NO
MSTRG.7945.6	Female	Male	5.11291	2.4111	0.000103961	0.00723018	NO
MSTRG.7948.1	Female	Male	10.6361	0.0698562	0.000728244	0.0272165	NO
MSTRG.7955.3	Female	Male	7.38659	3.7931	2.39393e-05	0.00270039	NO
MSTRG.7959.1	Female	Male	7.27433	-0.459056	0.000879764	0.030679	NO
MSTRG.8040.1	Female	Male	-7.40198	6.91502	1.40768e-07	5.04859e-05	NO
MSTRG.8041.3	Female	Male	3.58451	2.17942	0.00123862	0.0383521	NO
MSTRG.8078.4	Female	Male	-3.81405	6.39809	0.00027975	0.013978	NO
MSTRG.8216.1	Female	Male	10.7042	0.135927	8.72764e-10	6.09272e-07	NO
MSTRG.8221.8	Female	Male	15.6848	6.83026	0.000139888	0.00868407	NO
MSTRG.8243.4	Female	Male	3.73349	4.73404	9.79305e-06	0.00144356	NO
MSTRG.829.5	Female	Male	9.81918	-0.724033	0.000282298	0.0140765	NO
MSTRG.8306.1	Female	Male	4.40241	4.72668	0.000829089	0.0296095	NO
MSTRG.8306.3	Female	Male	13.9447	7.00964	1.21472e-16	2.80895e-13	NO
MSTRG.8320.25	Female	Male	11.7928	1.21029	0.00010454	0.00725681	NO
MSTRG.8346.1	Female	Male	-2.56974	5.52537	9.04799e-05	0.00657212	NO
MSTRG.8351.1	Female	Male	2.03651	3.95769	0.00154142	0.0437691	NO
MSTRG.8355.2	Female	Male	-17.2319	6.63543	7.76247e-05	0.00592173	NO
MSTRG.8379.1	Female	Male	-3.45156	5.12221	0.000675331	0.0260415	NO
MSTRG.8400.2	Female	Male	-3.57208	5.13886	0.000739673	0.0275047	NO
MSTRG.8402.2	Female	Male	10.522	-0.0425232	1.97582e-07	6.46932e-05	NO
MSTRG.8408.14	Female	Male	2.37239	5.19707	0.000311156	0.0149707	NO
MSTRG.8408.4	Female	Male	3.14475	3.66208	0.000412756	0.0183332	NO
MSTRG.8408.8	Female	Male	2.25195	3.62091	0.00131813	0.0399096	NO
MSTRG.8409.2	Female	Male	8.63335	1.85318	5.07761e-07	0.000140199	NO
MSTRG.8424.1	Female	Male	3.21032	5.1031	8.46525e-06	0.00131599	NO
MSTRG.8431.1	Female	Male	-4.06834	4.12858	0.000650843	0.0254282	NO
MSTRG.8432.2	Female	Male	-13.6612	3.06792	0.000631588	0.0249659	NO
MSTRG.8441.20	Female	Male	-10.7012	0.127807	0.00018408	0.0106252	NO
MSTRG.8451.1	Female	Male	-3.46557	5.87353	0.00108071	0.0350093	NO
MSTRG.8493.3	Female	Male	-11.2826	0.70376	0.00150324	0.0431806	NO
MSTRG.8498.1	Female	Male	-2.8762	3.35553	0.000674125	0.0260354	NO
MSTRG.8498.9	Female	Male	-15.6241	5.79567	0.00187525	0.0494528	NO
MSTRG.8562.1	Female	Male	-2.69085	4.96901	0.00160611	0.0449845	NO
MSTRG.8628.14	Female	Male	-10.2135	-0.345877	0.00169327	0.04639	NO
MSTRG.8628.46	Female	Male	5.42861	0.712934	0.000970302	0.0324889	NO
MSTRG.8646.16	Female	Male	-7.28148	-0.722086	0.000133725	0.00845243	NO
MSTRG.8715.6	Female	Male	4.29394	0.486952	0.000696154	0.0264174	NO
MSTRG.8727.11	Female	Male	-3.15415	5.56589	0.000757428	0.0279961	NO
MSTRG.8727.14	Female	Male	-2.97077	3.38482	0.00125507	0.0386058	NO
MSTRG.8727.27	Female	Male	-4.0465	4.07747	0.000308834	0.0148977	NO
MSTRG.8727.28	Female	Male	-3.37661	3.95076	0.000961532	0.032371	NO
MSTRG.8729.1	Female	Male	-5.63142	10.02	2.70717e-08	1.232e-05	NO
MSTRG.8732.2	Female	Male	-3.33588	4.59354	0.00071293	0.0268016	NO
MSTRG.874.2	Female	Male	-4.86667	3.62266	0.00168292	0.0462163	NO
MSTRG.8743.4	Female	Male	-3.86232	4.69174	0.00103541	0.0339621	NO
MSTRG.8746.9	Female	Male	10.322	-0.238107	7.87656e-05	0.00594745	NO
MSTRG.8783.7	Female	Male	5.88319	-0.126946	0.00187037	0.0493595	NO
MSTRG.8804.1	Female	Male	5.63584	3.00249	0.000741325	0.0275384	NO
MSTRG.8804.2	Female	Male	10.835	0.264836	6.69963e-05	0.00541222	NO
MSTRG.8804.3	Female	Male	7.0028	3.33164	0.00121431	0.0379654	NO
MSTRG.8805.2	Female	Male	7.11103	1.98705	0.000670688	0.0259569	NO
MSTRG.8805.3	Female	Male	10.2324	-0.325071	8.53739e-09	4.71455e-06	NO
MSTRG.8830.2	Female	Male	-6.30893	3.12657	9.28349e-06	0.0014077	NO
MSTRG.8875.3	Female	Male	-3.56085	2.70358	0.00108856	0.0350993	NO
MSTRG.8904.2	Female	Male	-10.9209	0.344373	0.00135107	0.0404435	NO
MSTRG.8912.46	Female	Male	-4.41553	-0.146299	0.00094623	0.0321483	NO
MSTRG.8912.47	Female	Male	-3.98722	1.32833	0.00115619	0.0366323	NO
MSTRG.8936.1	Female	Male	1.76128	7.56449	0.000457918	0.0197696	NO
MSTRG.8940.3	Female	Male	-2.57985	4.28701	0.00143044	0.0421531	NO
MSTRG.8945.1	Female	Male	4.21109	4.39986	9.71166e-05	0.00689677	NO
MSTRG.8985.1	Female	Male	-7.76727	7.57012	8.1586e-05	0.00612292	NO
MSTRG.8985.3	Female	Male	-11.7669	2.02267	0.000113218	0.00760248	NO
MSTRG.8999.6	Female	Male	6.65496	-0.652913	4.01988e-05	0.0038434	NO
MSTRG.900.3	Female	Male	-10.0328	-0.52601	9.83576e-05	0.00693987	NO
MSTRG.9011.1	Female	Male	-5.24566	7.28841	9.38642e-06	0.00140794	NO
MSTRG.9016.1	Female	Male	-3.10897	6.46135	0.00024506	0.0128975	NO
MSTRG.9048.1	Female	Male	7.22455	1.03145	0.000115492	0.00771315	NO
MSTRG.9059.1	Female	Male	4.02663	3.04705	0.000720729	0.0270175	NO
MSTRG.9062.2	Female	Male	-10.5013	3.45808	0.000338536	0.0158953	NO
MSTRG.9062.5	Female	Male	-10.9277	1.95361	0.00165628	0.045766	NO
MSTRG.9118.3	Female	Male	-5.91672	-0.146416	0.000260004	0.0134168	NO
MSTRG.9121.1	Female	Male	-2.4968	7.45032	0.00017104	0.0100332	NO
MSTRG.9126.3	Female	Male	2.86949	4.75066	2.45592e-05	0.00275353	NO
MSTRG.9150.1	Female	Male	-4.17348	7.8548	8.31612e-06	0.00130376	NO
MSTRG.9156.1	Female	Male	3.93641	8.22357	2.20305e-08	1.05255e-05	NO
MSTRG.9206.6	Female	Male	-4.38757	2.38282	0.000171111	0.0100332	NO
MSTRG.9229.12	Female	Male	-4.4502	3.29359	0.00126642	0.0389172	NO
MSTRG.9241.5	Female	Male	-4.60436	3.08518	0.000777885	0.0284397	NO
MSTRG.9258.7	Female	Male	6.30561	1.05906	0.00181506	0.0483828	NO
MSTRG.9277.16	Female	Male	-10.4661	-0.100341	2.15166e-05	0.00250344	NO
MSTRG.9280.1	Female	Male	-2.34801	6.10262	0.0018597	0.0492534	NO
MSTRG.9283.1	Female	Male	-11.8887	1.30376	0.00131615	0.0399096	NO
MSTRG.9314.3	Female	Male	2.92399	6.11009	0.00154526	0.0438135	NO
MSTRG.9320.2	Female	Male	-5.13854	3.87587	0.000615529	0.0243832	NO
MSTRG.9334.5	Female	Male	-3.56654	2.7661	0.000286314	0.0142192	NO
MSTRG.934.4	Female	Male	9.63446	-0.903226	0.000123925	0.00810085	NO
MSTRG.9342.2	Female	Male	11.6511	1.06899	0.00018813	0.0107917	NO
MSTRG.9345.1	Female	Male	-3.13334	3.87003	0.0015288	0.0436536	NO
MSTRG.9393.1	Female	Male	-3.85752	4.65932	0.000126693	0.00825264	NO
MSTRG.9393.2	Female	Male	-4.67739	3.645	0.0011313	0.0361147	NO
MSTRG.9399.1	Female	Male	9.2784	-1.24333	1.21692e-07	4.54798e-05	NO
MSTRG.9429.1	Female	Male	-5.9402	7.88005	7.97824e-07	0.000202183	NO
MSTRG.9452.2	Female	Male	5.84614	1.65313	0.00145935	0.0427236	NO
MSTRG.9465.1	Female	Male	-3.09489	5.58012	0.00102468	0.0337907	NO
MSTRG.9565.1	Female	Male	8.98956	4.29564	4.62504e-06	0.000838833	NO
MSTRG.9575.1	Female	Male	-7.37905	4.74096	0.000316577	0.0151723	NO
MSTRG.9595.3	Female	Male	-4.84082	3.96443	0.00146296	0.0427891	NO
MSTRG.9595.5	Female	Male	-14.0503	6.15533	0.000732732	0.027329	NO
MSTRG.9595.7	Female	Male	-7.42337	6.7845	0.000493387	0.0209104	NO
MSTRG.9611.1	Female	Male	-12.2081	2.9284	3.93811e-07	0.000113833	NO
MSTRG.9611.2	Female	Male	-3.87472	4.39567	0.00178804	0.0478714	NO
MSTRG.9621.5	Female	Male	3.48278	2.94109	0.000809766	0.0291162	NO
MSTRG.9626.2	Female	Male	-11.5283	0.946247	0.00142693	0.0421348	NO
MSTRG.9658.1	Female	Male	-3.67212	3.75864	0.000934753	0.0318462	NO
MSTRG.9677.6	Female	Male	-12.144	1.55722	0.00104336	0.0341623	NO
MSTRG.9677.7	Female	Male	-9.14041	3.44228	4.20022e-06	0.000788852	NO
MSTRG.9679.1	Female	Male	4.20474	2.43539	3.28128e-06	0.000642349	NO
MSTRG.98.1	Female	Male	-4.2637	6.057	2.14316e-06	0.000458351	NO
MSTRG.980.4	Female	Male	8.22254	3.67624	0.000774993	0.0283786	NO
MSTRG.9810.1	Female	Male	-3.30675	4.48305	0.00148796	0.0430779	NO
MSTRG.9813.14	Female	Male	-15.9586	5.36246	8.09808e-30	1.4981e-25	NO
MSTRG.9822.1	Female	Male	6.56538	-0.568264	0.00051289	0.0215641	NO
MSTRG.9880.2	Female	Male	4.1027	0.438171	0.00169509	0.04639	NO
MSTRG.9881.1	Female	Male	-8.50879	-0.340278	0.0002426	0.0128228	NO
MSTRG.9881.2	Female	Male	-3.22364	1.21996	0.000901425	0.0310538	NO
MSTRG.9939.2	Female	Male	-7.20888	1.97497	1.40864e-05	0.00184163	NO
MSTRG.9958.1	Female	Male	10.1654	-0.390361	7.15643e-05	0.00564564	NO

## Sheet: C. Oscarella lobularis
Transcript_ID	sampleA	sampleB	logFC	logCPM	PValue	FDR	Sex-loci
Osclob_v00_mik.OX382169.1G443.1	Female	Male	-10.103	-0.0255652	0.000140458	0.029876	NO
Osclob_v00_mik.OX382168.1G330.1	Female	Male	-9.0977	-1.00001	0.000200593	0.0380544	NO
Osclob_v00_mik.OX382164.1G573.1	Female	Male	12.4622	1.31329	0.000133268	0.0292325	NO
Osclob_v00_mik.OX382164.1G509.1	Female	Male	12.9708	1.81919	7.6354e-05	0.0219773	NO
Osclob_v00_mik.OX382164.1G141.1	Female	Male	-18.6779	8.5184	8.63568e-06	0.00457479	NO
Osclob_v00_mik.OX382162.1G425.4	Female	Male	11.1144	-0.0178227	4.77125e-07	0.000405946	NO
Osclob_v00_mik.OX382161.1G365.1	Female	Male	-14.9435	4.78504	2.30767e-10	6.47925e-07	NO
Osclob_v00_mik.OX382161.1G362.1	Female	Male	-15.0304	4.87185	6.61822e-09	9.29098e-06	NO
Osclob_v00_mik.OX382160.1G404.1	Female	Male	-10.8613	0.72038	1.31334e-07	0.000131695	NO
Osclob_v00_mik.OX382160.1G288.1	Female	Male	-11.561	1.41288	6.39177e-05	0.0201642	NO
Osclob_v00_mik.OX382159.1G755.1	Female	Male	7.00495	-0.351749	1.64678e-08	2.03822e-05	NO
Osclob_v00_mik.OX382159.1G325.1	Female	Male	3.48475	-0.494674	9.72001e-05	0.0245864	NO
Osclob_v00_mik.OX382158.1G784.1	Female	Male	-15.1349	4.97635	0.000303362	0.0492341	NO
Osclob_v00_mik.OX382158.1G684.3	Female	Male	-13.273	3.11702	0.000323946	0.0506316	NO
Osclob_v00_mik.OX382158.1G238.1	Female	Male	-13.1716	3.01583	3.77201e-07	0.000330958	NO
Osclob_v00_mik.OX382158.1G237.1	Female	Male	-14.6861	4.52787	1.41731e-09	2.84242e-06	NO
Osclob_v00_mik.OX382158.1G232.1	Female	Male	3.92467	5.18373	0.000193517	0.0374715	NO
Osclob_v00_mik.OX382157.1G753.1	Female	Male	-11.0615	6.48533	9.31608e-05	0.0242192	NO
Osclob_v00_mik.OX382157.1G752.1	Female	Male	-7.51334	4.59988	0.000128695	0.0286776	NO
Osclob_v00_mik.OX382154.1G736.1	Female	Male	-7.90157	2.1154	1.58296e-06	0.00105821	NO
Osclob_v00_mik.OX382154.1G578.1	Female	Male	10.5327	-0.584347	0.000260973	0.0446789	NO
Osclob_v00_mik.OX382154.1G561.1	Female	Male	-6.70525	0.628744	0.000276075	0.0467506	NO
Osclob_v00_mik.OX382154.1G560.4	Female	Male	-10.8172	0.676933	8.36914e-06	0.00451885	NO
Osclob_v00_mik.OX382154.1G344.1	Female	Male	-11.4001	1.25326	1.21541e-05	0.00596171	NO
Osclob_v00_mik.OX382153.1G929.1	Female	Male	11.3745	0.237329	0.000302491	0.0492341	NO
Osclob_v00_mik.OX382153.1G385.1	Female	Male	5.63529	-0.177962	7.23398e-05	0.0214206	NO
Osclob_v00_mik.OX382151.1G56.1	Female	Male	16.1328	4.97411	5.68928e-18	5.3246e-14	NO
Osclob_v00_mik.OX382151.1G395.1	Female	Male	11.1773	0.0450929	0.000166161	0.0334432	NO
Osclob_v00_mik.OX382151.1G284.1	Female	Male	-8.88172	3.53621	2.13178e-05	0.00906878	NO
Osclob_v00_mik.OX382151.1G1095.1	Female	Male	12.8011	1.65047	7.5439e-05	0.0219773	NO
Osclob_v00_mik.OX382150.1G463.2	Female	Male	11.2991	0.164691	0.000214348	0.0393349	NO
Osclob_v00_mik.OX382150.1G2185.1	Female	Male	14.5081	3.3513	1.54147e-05	0.00733558	NO
Osclob_v00_mik.OX382150.1G21.2	Female	Male	12.8381	1.68704	0.000109883	0.0263691	NO
Osclob_v00_mik.OX382150.1G2068.2	Female	Male	-9.35602	-0.751647	0.000196096	0.0377108	NO
Osclob_v00_mik.OX382150.1G1873.1	Female	Male	-4.0899	2.60091	0.000248035	0.0435255	NO
Osclob_v00_mik.OX382150.1G1713.1	Female	Male	4.3628	6.59783	5.55376e-08	5.99742e-05	NO
Osclob_v00_mik.OX382150.1G131.1	Female	Male	2.72638	4.75681	0.000257428	0.0446161	NO
Osclob_v00_mik.OX382150.1G1125.1	Female	Male	10.9873	-0.142597	1.51562e-07	0.000146738	NO
MSTRG.9747.5	Female	Male	-11.2917	1.1459	0.000130539	0.0288593	NO
MSTRG.9747.4	Female	Male	-12.6061	6.10683	0.000103577	0.0257356	NO
MSTRG.9685.4	Female	Male	14.5131	3.35629	4.52807e-05	0.0156956	NO
MSTRG.9674.5	Female	Male	9.15964	1.46874	7.8228e-07	0.000627545	NO
MSTRG.9599.17	Female	Male	12.5469	1.3975	0.000117905	0.0277296	NO
MSTRG.9526.8	Female	Male	-9.88446	-0.238672	1.20674e-05	0.00596171	NO
MSTRG.9468.4	Female	Male	13.1326	1.98013	8.05451e-05	0.0221346	NO
MSTRG.9462.3	Female	Male	-10.3991	0.264898	0.000118515	0.0277296	NO
MSTRG.9449.3	Female	Male	-14.2392	4.0814	7.0558e-11	2.5819e-07	NO
MSTRG.9445.4	Female	Male	-8.82657	-1.25863	0.00029316	0.0481348	NO
MSTRG.9445.1	Female	Male	4.28531	1.61549	8.08374e-05	0.0221346	NO
MSTRG.9163.3	Female	Male	11.5665	0.427882	0.000172897	0.0339471	NO
MSTRG.9104.7	Female	Male	14.9705	3.81285	2.10958e-05	0.00906878	NO
MSTRG.9074.3	Female	Male	11.3809	0.24353	0.000326829	0.0506983	NO
MSTRG.9053.5	Female	Male	14.1974	3.04108	3.53542e-05	0.0134141	NO
MSTRG.8989.12	Female	Male	9.6472	9.73451	2.87509e-06	0.00183464	NO
MSTRG.8690.1	Female	Male	-13.5454	3.38871	1.23154e-05	0.00596171	NO
MSTRG.8600.5	Female	Male	11.0462	-0.0850638	0.000324597	0.0506316	NO
MSTRG.8526.1	Female	Male	-13.2813	3.12526	4.90791e-05	0.0164095	NO
MSTRG.7727.6	Female	Male	12.6763	1.52586	0.000140108	0.029876	NO
MSTRG.7681.4	Female	Male	11.5244	0.385839	0.000221138	0.0398005	NO
MSTRG.7325.3	Female	Male	13.5117	2.35756	3.64263e-05	0.0136365	NO
MSTRG.7319.5	Female	Male	15.6116	4.45322	2.57028e-05	0.0106126	NO
MSTRG.7184.4	Female	Male	12.7781	1.62763	6.14513e-05	0.0198318	NO
MSTRG.7066.4	Female	Male	-12.3687	2.21575	2.15466e-09	4.0331e-06	NO
MSTRG.7028.1	Female	Male	-3.69822	7.09127	8.64436e-05	0.023115	NO
MSTRG.7008.1	Female	Male	9.02707	0.813203	7.24778e-05	0.0214206	NO
MSTRG.6985.5	Female	Male	13.1196	1.96706	8.91857e-05	0.0236233	NO
MSTRG.6980.4	Female	Male	11.1512	0.0194243	0.000167251	0.0334432	NO
MSTRG.6976.5	Female	Male	-13.1925	3.03662	0.000219958	0.0398005	NO
MSTRG.6884.1	Female	Male	-12.6389	2.48476	0.000254154	0.0443222	NO
MSTRG.683.11	Female	Male	11.7651	0.622682	0.000223923	0.0400451	NO
MSTRG.6819.25	Female	Male	9.24603	0.262736	7.10776e-05	0.0214206	NO
MSTRG.6798.6	Female	Male	4.56248	5.56164	1.87867e-05	0.00824178	NO
MSTRG.673.24	Female	Male	12.1543	1.00844	1.32773e-09	2.84242e-06	NO
MSTRG.668.13	Female	Male	12.0581	0.913415	0.000108852	0.0263691	NO
MSTRG.6479.24	Female	Male	18.9066	7.74716	2.23703e-27	6.28092e-23	NO
MSTRG.6143.9	Female	Male	12.7494	1.59894	0.000142854	0.0301571	NO
MSTRG.6079.5	Female	Male	11.7442	0.602673	7.35662e-11	2.5819e-07	NO
MSTRG.6052.4	Female	Male	-4.76702	1.03089	0.000127339	0.0286776	NO
MSTRG.6014.1	Female	Male	-14.6917	4.53349	6.35189e-05	0.0201642	NO
MSTRG.5789.8	Female	Male	12.3754	1.22781	0.000155642	0.0318975	NO
MSTRG.5789.2	Female	Male	13.7694	2.61429	6.22117e-13	4.3668e-09	NO
MSTRG.5660.1	Female	Male	-9.04012	2.80096	2.40703e-05	0.0100869	NO
MSTRG.5429.7	Female	Male	-12.4884	2.3349	9.18664e-06	0.0046897	NO
MSTRG.5429.10	Female	Male	-10.0094	-0.11717	7.20972e-06	0.00396916	NO
MSTRG.5429.1	Female	Male	-11.8989	1.74844	3.96087e-06	0.00241759	NO
MSTRG.5248.2	Female	Male	12.2879	1.14104	0.000109429	0.0263691	NO
MSTRG.519.8	Female	Male	-8.64804	3.48115	0.00022815	0.0405429	NO
MSTRG.4704.6	Female	Male	15.2908	4.13287	4.90936e-05	0.0164095	NO
MSTRG.4392.25	Female	Male	9.71181	-1.37395	3.01047e-06	0.00187833	NO
MSTRG.4353.2	Female	Male	5.52886	4.76629	0.00025913	0.0446356	NO
MSTRG.4309.16	Female	Male	15.4793	4.32115	2.40971e-09	4.22858e-06	NO
MSTRG.4253.2	Female	Male	5.09785	11.4347	0.000124941	0.0286776	NO
MSTRG.424.17	Female	Male	16.6457	5.48675	4.06967e-05	0.0146493	NO
MSTRG.419.4	Female	Male	18.9469	7.78751	1.64607e-06	0.00107481	NO
MSTRG.4076.10	Female	Male	13.7309	2.57594	6.67967e-05	0.0208383	NO
MSTRG.4062.4	Female	Male	12.6088	1.45939	7.07718e-05	0.0214206	NO
MSTRG.383.20	Female	Male	11.6838	0.542373	0.000234448	0.0413999	NO
MSTRG.3641.1	Female	Male	-10.8039	0.66356	8.11627e-05	0.0221346	NO
MSTRG.3593.2	Female	Male	15.6952	4.53677	1.60505e-05	0.00747207	NO
MSTRG.3414.21	Female	Male	13.6834	2.52869	3.05257e-05	0.0122438	NO
MSTRG.3414.15	Female	Male	11.1	-0.030733	0.000171742	0.0339471	NO
MSTRG.3397.1	Female	Male	-13.8278	3.67065	9.65901e-05	0.0245864	NO
MSTRG.3390.1	Female	Male	-16.2529	6.09377	0.000147953	0.0310006	NO
MSTRG.3368.1	Female	Male	-14.0296	3.87208	0.00028911	0.0477491	NO
MSTRG.3329.32	Female	Male	11.0209	-0.108198	0.000179443	0.0349876	NO
MSTRG.3105.28	Female	Male	10.2311	0.184747	0.000283089	0.0472567	NO
MSTRG.3071.6	Female	Male	-10.0984	-0.0301845	1.64999e-05	0.00747207	NO
MSTRG.3026.4	Female	Male	13.6155	2.46106	3.73193e-05	0.013787	NO
MSTRG.2926.4	Female	Male	11.8578	0.714384	1.16831e-07	0.000121491	NO
MSTRG.2892.3	Female	Male	-13.1259	2.97023	0.000348565	0.0537728	NO
MSTRG.2843.6	Female	Male	-5.99095	6.05342	4.40506e-06	0.00257669	NO
MSTRG.2832.5	Female	Male	-14.9653	4.80689	0.000217617	0.0396756	NO
MSTRG.2608.7	Female	Male	12.2735	1.12654	5.53887e-09	8.63972e-06	NO
MSTRG.2597.8	Female	Male	13.9205	2.76501	3.27928e-07	0.000297008	NO
MSTRG.2566.2	Female	Male	12.4534	1.30515	7.94508e-05	0.0221346	NO
MSTRG.253.2	Female	Male	-12.0543	1.90286	1.64326e-05	0.00747207	NO
MSTRG.244.23	Female	Male	-12.9995	2.84415	1.4494e-06	0.000992553	NO
MSTRG.239.10	Female	Male	20.526	9.36647	2.10366e-08	2.46102e-05	NO
MSTRG.2269.3	Female	Male	10.9016	-0.226469	0.000320226	0.0505112	NO
MSTRG.2168.16	Female	Male	14.3629	3.20622	4.37427e-05	0.015352	NO
MSTRG.2114.12	Female	Male	12.981	1.82916	1.75241e-12	9.84046e-09	NO
MSTRG.2050.5	Female	Male	15.3398	4.18177	6.32302e-09	9.29098e-06	NO
MSTRG.2024.2	Female	Male	11.4558	0.317407	0.000278069	0.0467506	NO
MSTRG.1687.8	Female	Male	-9.77185	-0.348567	6.33416e-06	0.00355689	NO
MSTRG.1684.1	Female	Male	-9.57947	-0.536059	1.2051e-06	0.000890412	NO
MSTRG.1638.12	Female	Male	13.1453	4.07612	1.04283e-06	0.000791343	NO
MSTRG.1630.7	Female	Male	11.9268	0.783058	4.17576e-11	1.95405e-07	NO
MSTRG.1571.9	Female	Male	5.39248	6.36824	0.000315776	0.0503753	NO
MSTRG.1571.5	Female	Male	5.89207	5.49648	5.58129e-05	0.018436	NO
MSTRG.1571.4	Female	Male	4.67113	5.16176	9.16642e-06	0.0046897	NO
MSTRG.1571.3	Female	Male	7.09866	6.88848	9.60559e-07	0.000749156	NO
MSTRG.1571.22	Female	Male	5.54581	7.81728	1.66966e-08	2.03822e-05	NO
MSTRG.14912.10	Female	Male	15.7976	4.63913	1.68366e-05	0.0075035	NO
MSTRG.14884.3	Female	Male	-9.80009	5.11644	1.63598e-08	2.03822e-05	NO
MSTRG.14826.2	Female	Male	-7.2153	3.96409	0.000149384	0.0310686	NO
MSTRG.14702.4	Female	Male	12.3286	1.18144	8.21729e-05	0.0221843	NO
MSTRG.14692.1	Female	Male	-6.55793	0.11316	0.000209957	0.0392998	NO
MSTRG.14647.8	Female	Male	13.472	2.31805	3.50942e-05	0.0134141	NO
MSTRG.14639.18	Female	Male	10.5312	2.38118	0.000127741	0.0286776	NO
MSTRG.14356.4	Female	Male	11.863	0.719529	0.000200453	0.0380544	NO
MSTRG.14055.1	Female	Male	-13.5321	10.0554	0.000284446	0.0472567	NO
MSTRG.13990.7	Female	Male	-14.8168	4.65845	0.000101896	0.0255439	NO
MSTRG.13419.4	Female	Male	12.5894	1.43975	5.42144e-09	8.63972e-06	NO
MSTRG.13411.2	Female	Male	13.0045	1.85237	2.55529e-10	6.52226e-07	NO
MSTRG.13401.2	Female	Male	-11.3833	1.23662	0.000202054	0.0380742	NO
MSTRG.13309.12	Female	Male	6.70601	4.16493	1.30399e-06	0.000918832	NO
MSTRG.13299.5	Female	Male	6.86081	2.42375	0.000126389	0.0286776	NO
MSTRG.13198.3	Female	Male	-9.50756	-0.605206	0.000167382	0.0334432	NO
MSTRG.1318.11	Female	Male	9.53498	1.17087	0.000277903	0.0467506	NO
MSTRG.13155.33	Female	Male	12.0811	0.935825	0.000167948	0.0334432	NO
MSTRG.13016.3	Female	Male	-13.8086	3.6515	0.000213957	0.0393349	NO
MSTRG.12994.4	Female	Male	-13.5199	3.36328	0.000317797	0.0504112	NO
MSTRG.12979.14	Female	Male	-12.0727	6.25334	0.000150784	0.0311291	NO
MSTRG.12871.1	Female	Male	8.56646	0.00260273	7.67095e-05	0.0219773	NO
MSTRG.12847.8	Female	Male	-12.8734	2.71849	8.12004e-05	0.0221346	NO
MSTRG.12795.5	Female	Male	12.4824	1.33378	1.21237e-10	3.78219e-07	NO
MSTRG.12763.1	Female	Male	-13.2422	3.08615	5.83256e-10	1.36467e-06	NO
MSTRG.12372.9	Female	Male	7.0956	-0.503758	2.78242e-05	0.0113221	NO
MSTRG.12305.1	Female	Male	-10.6494	0.511192	0.000125623	0.0286776	NO
MSTRG.12119.10	Female	Male	16.1732	5.01454	4.2286e-06	0.0025261	NO
MSTRG.12107.6	Female	Male	11.0547	-0.0751491	0.000211923	0.0393349	NO
MSTRG.11968.2	Female	Male	15.6772	4.51888	8.65646e-20	1.21524e-15	NO
MSTRG.11834.1	Female	Male	-10.7087	0.569613	2.7804e-07	0.000260218	NO
MSTRG.11826.1	Female	Male	4.17119	7.63835	0.000114207	0.0271745	NO
MSTRG.11739.24	Female	Male	10.3946	7.43467	3.40752e-05	0.0132879	NO
MSTRG.1168.1	Female	Male	-9.56921	-0.545698	6.75486e-05	0.0208413	NO
MSTRG.11647.2	Female	Male	11.7242	0.583355	6.1084e-07	0.000504428	NO
MSTRG.11634.6	Female	Male	13.8486	2.69325	4.85335e-05	0.0164095	NO
MSTRG.11563.1	Female	Male	-11.4018	1.25502	0.000106627	0.026261	NO
MSTRG.11292.1	Female	Male	6.52663	-0.954918	3.13116e-05	0.0123822	NO
MSTRG.11250.3	Female	Male	12.9171	1.76577	9.2543e-05	0.0242192	NO
MSTRG.11059.7	Female	Male	12.9654	1.81377	9.5724e-05	0.0245864	NO
MSTRG.10897.4	Female	Male	11.7721	0.630668	0.00013641	0.0296897	NO
MSTRG.10897.17	Female	Male	9.05025	1.41618	0.000311445	0.0499682	NO
MSTRG.10561.1	Female	Male	-12.9298	2.77469	5.45843e-08	5.99742e-05	NO
MSTRG.10560.3	Female	Male	-10.7136	0.574522	4.20245e-05	0.0149357	NO
MSTRG.10552.17	Female	Male	12.8019	1.6513	5.96491e-05	0.0194741	NO
MSTRG.10219.4	Female	Male	-13.9217	3.76438	0.000139389	0.029876	NO
MSTRG.1020.6	Female	Male	-12.369	2.21599	1.30902e-06	0.000918832	NO
MSTRG.10145.2	Female	Male	14.0267	2.87085	4.01397e-05	0.0146364	NO
MSTRG.10071.3	Female	Male	10.9354	-0.193379	0.000310062	0.0499682	NO
MSTRG.10039.1	Female	Male	-11.1373	0.992988	5.58837e-06	0.00320214	NO

## Sheet: D. Petrosia ficiformis
Transcript_ID	ref_gene_id	sampleA	sampleB	logFC	logCPM	PValue	FDR	Sex-loci
MSTRG.13464.2	Petfic_v00_mik.OX345642.1G984	Female	Male	-19.3257	10.5993	1.10566e-12	1.17439e-09	FEM
MSTRG.1720.3	Petfic_v00_mik.OX345636.1G1937	Female	Male	-15.2692	6.54361	0.00188438	0.0449173	FEM
MSTRG.15725.1	Petfic_v00_mik.OX345645.1G402	Female	Male	-13.5301	4.80644	2.05714e-07	3.66049e-05	FEM
MSTRG.22005.6	Petfic_v00_mik.OX345653.1G588	Female	Male	-13.2459	4.52313	1.25378e-05	0.000880762	FEM
MSTRG.7448.19	Petfic_v00_mik.OX345637.1G1538	Female	Male	-11.7753	3.06251	0.00192567	0.0456963	FEM
MSTRG.16580.2	Petfic_v00_mik.OX345646.1G389	Female	Male	-11.1862	2.47368	0.000180687	0.00696367	FEM
Petfic_v00_mik.OX345640.1G964.3	Petfic_v00_mik.OX345640.1G964	Female	Male	-10.8666	2.16352	1.46509e-05	0.000997541	FEM
MSTRG.889.4	Petfic_v00_mik.OX345636.1G957	Female	Male	-10.7771	2.07285	9.52397e-09	3.12221e-06	FEM
MSTRG.6161.8	Petfic_v00_mik.OX345637.1G199	Female	Male	-10.3179	1.62743	0.0020895	0.048628	FEM
MSTRG.8244.2	Petfic_v00_mik.OX345638.1G583	Female	Male	-9.68764	6.60667	0.00110953	0.0300945	FEM
MSTRG.6414.1	Petfic_v00_mik.OX345637.1G530	Female	Male	-7.98656	4.37445	0.00194869	0.046119	FEM
Petfic_v00_mik.OX345651.1G190.1	Petfic_v00_mik.OX345651.1G190	Female	Male	-7.80153	4.62127	8.75085e-05	0.00396514	FEM
Petfic_v00_mik.OX345637.1G799.2	Petfic_v00_mik.OX345637.1G795	Female	Male	-7.67289	0.845446	0.00164556	0.0406278	FEM
MSTRG.8244.1	Petfic_v00_mik.OX345638.1G583	Female	Male	-7.22909	5.02104	0.000390858	0.0129526	FEM
MSTRG.17295.1	Petfic_v00_mik.OX345647.1G338	Female	Male	-7.0929	8.93856	2.63112e-05	0.00158788	FEM
Petfic_v00_mik.OX345638.1G583.1	Petfic_v00_mik.OX345638.1G583	Female	Male	-6.55509	7.76573	4.09652e-05	0.002202	FEM
MSTRG.21325.1	Petfic_v00_mik.OX345652.1G586	Female	Male	-6.16995	9.34774	4.71137e-06	0.000411532	FEM
Petfic_v00_mik.OX345645.1G402.1	Petfic_v00_mik.OX345645.1G402	Female	Male	-6.02475	9.45322	6.46141e-06	0.000521508	FEM
Petfic_v00_mik.OX345650.1G151.1	Petfic_v00_mik.OX345650.1G149	Female	Male	-5.02506	8.64746	4.54166e-05	0.00240238	FEM
MSTRG.20316.1	Petfic_v00_mik.OX345651.1G229	Female	Male	-4.99664	4.49888	4.06853e-05	0.00219585	FEM
Petfic_v00_mik.OX345651.1G229.1	Petfic_v00_mik.OX345651.1G229	Female	Male	-4.96467	7.65732	4.75367e-05	0.00249464	FEM
Petfic_v00_mik.OX345647.1G338.1	Petfic_v00_mik.OX345647.1G338	Female	Male	-4.83183	9.50574	0.000158216	0.0063082	FEM
MSTRG.6490.5	Petfic_v00_mik.OX345637.1G597	Female	Male	-4.82946	0.862647	0.000684297	0.0206217	FEM
Petfic_v00_mik.OX345638.1G249.1	Petfic_v00_mik.OX345638.1G246	Female	Male	-4.70516	4.21642	0.00150817	0.0381408	FEM
Petfic_v00_mik.OX345637.1G530.1	Petfic_v00_mik.OX345637.1G530	Female	Male	-4.53849	7.47313	5.22922e-05	0.00269102	FEM
MSTRG.9229.1	Petfic_v00_mik.OX345639.1G233	Female	Male	2.64821	7.45637	0.00167863	0.0411708	FEM
MSTRG.14899.7	Petfic_v00_mik.OX345644.1G532	Female	Male	3.30141	4.05645	0.000847788	0.0243902	FEM
MSTRG.2036.6	Petfic_v00_mik.OX345636.1G2312	Female	Male	5.97482	2.29658	0.00214387	0.0497191	FEM
MSTRG.14084.9	Petfic_v00_mik.OX345643.1G562	Female	Male	6.6961	0.338607	0.00142003	0.0363994	FEM
Petfic_v00_mik.OX345639.1G366.1	Petfic_v00_mik.OX345639.1G366	Female	Male	7.52866	-0.959096	0.000145862	0.00591331	FEM
MSTRG.22005.7	Petfic_v00_mik.OX345653.1G588	Female	Male	7.71426	-0.799739	7.4692e-05	0.00349801	FEM
MSTRG.15758.1	Petfic_v00_mik.OX345645.1G423	Female	Male	8.08827	6.67523	5.66225e-05	0.00284764	FEM
MSTRG.12572.2	Petfic_v00_mik.OX345642.1G93	Female	Male	8.2787	4.22704	0.00106135	0.0291448	FEM
MSTRG.12742.10	Petfic_v00_mik.OX345642.1G247	Female	Male	8.40024	-0.189784	2.24076e-05	0.00138698	FEM
Petfic_v00_mik.OX345636.1G1203.1	Petfic_v00_mik.OX345636.1G1203	Female	Male	9.21544	0.568724	2.50539e-06	0.000255877	FEM
MSTRG.10716.2	Petfic_v00_mik.OX345640.1G229	Female	Male	9.47333	3.58314	2.58063e-12	2.36297e-09	FEM
MSTRG.22005.3	Petfic_v00_mik.OX345653.1G588	Female	Male	9.53281	0.870233	9.19692e-08	2.07766e-05	FEM
MSTRG.15109.4	Petfic_v00_mik.OX345644.1G580	Female	Male	10.1472	1.46237	8.7653e-05	0.00396514	FEM
MSTRG.8729.3	Petfic_v00_mik.OX345638.1G942	Female	Male	11.243	2.53692	3.17209e-06	0.000300828	FEM
MSTRG.6628.13	Petfic_v00_mik.OX345637.1G736	Female	Male	12.7048	3.98567	2.86822e-08	8.00897e-06	FEM
Petfic_v00_mik.OX345636.1G961.2	Petfic_v00_mik.OX345636.1G957	Female	Male	15.1965	6.47125	1.42328e-08	4.39464e-06	FEM
MSTRG.6628.15	Petfic_v00_mik.OX345637.1G736	Female	Male	15.623	6.89749	0.00182643	0.0438111	FEM
MSTRG.9229.2	Petfic_v00_mik.OX345639.1G233	Female	Male	16.9653	8.23921	0.00168969	0.041239	FEM
MSTRG.14935.3	Petfic_v00_mik.OX345644.1G693	Female	Male	-13.1429	4.42092	4.31997e-16	9.55938e-13	MAL
MSTRG.19803.3	Petfic_v00_mik.OX345650.1G560	Female	Male	-13.0133	4.29166	1.90996e-12	1.81132e-09	MAL
MSTRG.17652.4	Petfic_v00_mik.OX345647.1G706	Female	Male	-12.4528	3.73289	4.73042e-06	0.000411841	MAL
MSTRG.1395.1	Petfic_v00_mik.OX345636.1G1530	Female	Male	-10.1679	6.55214	1.80192e-05	0.00117853	MAL
MSTRG.15145.4	Petfic_v00_mik.OX345644.1G634	Female	Male	-10.0006	3.10586	2.38329e-08	6.80494e-06	MAL
MSTRG.12001.3	Petfic_v00_mik.OX345641.1G544	Female	Male	-9.66439	0.987632	3.57402e-08	9.58632e-06	MAL
Petfic_v00_mik.OX345636.1G1530.1	Petfic_v00_mik.OX345636.1G1530	Female	Male	-9.60404	9.31342	8.97403e-08	2.05428e-05	MAL
MSTRG.12314.3	Petfic_v00_mik.OX345641.1G855	Female	Male	-8.67907	0.0495057	8.7928e-05	0.00397081	MAL
MSTRG.16507.10	Petfic_v00_mik.OX345646.1G228	Female	Male	-8.46743	-0.155625	0.000924922	0.0261281	MAL
MSTRG.15145.1	Petfic_v00_mik.OX345644.1G634	Female	Male	-3.40074	2.62552	2.37287e-05	0.00145855	MAL
Petfic_v00_mik.OX345647.1G706.1	Petfic_v00_mik.OX345647.1G706	Female	Male	-2.88324	7.91008	0.00135641	0.0353118	MAL
Petfic_v00_mik.OX345637.1G620.1	Petfic_v00_mik.OX345637.1G620	Female	Male	1.91792	6.10808	0.00149786	0.0379744	MAL
MSTRG.14935.4	Petfic_v00_mik.OX345644.1G693	Female	Male	3.28041	3.06905	0.00111616	0.0302127	MAL
MSTRG.6497.4	Petfic_v00_mik.OX345637.1G620	Female	Male	3.78904	3.1506	2.83637e-05	0.00167892	MAL
MSTRG.18580.2	Petfic_v00_mik.OX345649.1G98	Female	Male	11.8035	3.09037	4.45342e-09	1.64245e-06	MAL
MSTRG.6497.5	Petfic_v00_mik.OX345637.1G620	Female	Male	12.0252	3.31042	2.60967e-10	1.33264e-07	MAL
MSTRG.10430.2	Petfic_v00_mik.OX345639.1G1483	Female	Male	-19.5605	10.8341	4.25728e-07	6.42316e-05	#N/A
MSTRG.9435.3	Petfic_v00_mik.OX345639.1G470	Female	Male	-19.0782	10.3518	9.23265e-08	2.07766e-05	#N/A
Petfic_v00_mik.OX345650.1G740.1	Petfic_v00_mik.OX345650.1G740	Female	Male	-18.4753	9.7489	4.25478e-12	3.64456e-09	#N/A
Petfic_v00_mik.OX345642.1G159.1	Petfic_v00_mik.OX345642.1G159	Female	Male	-18.2306	9.50425	8.08098e-12	6.31125e-09	#N/A
MSTRG.10430.3	Petfic_v00_mik.OX345639.1G1483	Female	Male	-17.6341	8.9078	1.5146e-07	3.04687e-05	#N/A
MSTRG.15270.1	Petfic_v00_mik.OX345644.1G941	Female	Male	-16.7433	9.83197	6.72111e-06	0.000539191	#N/A
MSTRG.14941.3	Petfic_v00_mik.OX345644.1G694	Female	Male	-16.6277	9.78312	0.00162218	0.0401447	#N/A
MSTRG.14941.10	Petfic_v00_mik.OX345644.1G694	Female	Male	-16.5768	7.85069	4.35732e-11	2.89261e-08	#N/A
Petfic_v00_mik.OX345647.1G501.1	Petfic_v00_mik.OX345647.1G501	Female	Male	-16.3804	7.65444	1.5554e-07	3.08225e-05	#N/A
MSTRG.9719.1	Petfic_v00_mik.OX345639.1G731	Female	Male	-16.3302	7.60418	1.61598e-05	0.00108088	#N/A
MSTRG.21576.3	Petfic_v00_mik.OX345653.1G151	Female	Male	-15.6869	6.96126	0.00070043	0.0209923	#N/A
MSTRG.17003.3	Petfic_v00_mik.OX345647.1G56	Female	Male	-15.6852	6.95951	2.92893e-18	1.29625e-14	#N/A
MSTRG.18241.4	Petfic_v00_mik.OX345648.1G606	Female	Male	-15.6491	6.92341	0.00198291	0.0468038	#N/A
MSTRG.10543.2	Petfic_v00_mik.OX345640.1G78	Female	Male	-15.5825	6.85688	2.8915e-09	1.12913e-06	#N/A
MSTRG.17937.12	Petfic_v00_mik.OX345648.1G270	Female	Male	-15.4784	6.75294	0.000480398	0.0154348	#N/A
Petfic_v00_mik.OX345644.1G705.1	Petfic_v00_mik.OX345644.1G704	Female	Male	-15.4105	6.68509	0.00100595	0.0280294	#N/A
MSTRG.10441.3	Petfic_v00_mik.OX345639.1G1488	Female	Male	-15.3095	6.5839	4.53753e-13	6.02448e-10	#N/A
Petfic_v00_mik.OX345644.1G704.1	Petfic_v00_mik.OX345644.1G704	Female	Male	-15.3035	6.57808	2.37208e-09	9.8419e-07	#N/A
Petfic_v00_mik.OX345638.1G133.2	Petfic_v00_mik.OX345638.1G133	Female	Male	-15.2588	6.53346	0.000863961	0.0248017	#N/A
MSTRG.18588.3	Petfic_v00_mik.OX345649.1G109	Female	Male	-15.2564	6.53062	7.13478e-05	0.00335917	#N/A
MSTRG.14941.4	Petfic_v00_mik.OX345644.1G694	Female	Male	-14.7664	6.04156	0.000939082	0.0264999	#N/A
MSTRG.3541.2	Petfic_v00_mik.OX345636.1G4197	Female	Male	-14.7566	6.0313	0.00205642	0.0480265	#N/A
MSTRG.10376.4	Petfic_v00_mik.OX345639.1G1430	Female	Male	-14.7172	5.99234	4.47771e-05	0.00238065	#N/A
MSTRG.13342.2	Petfic_v00_mik.OX345642.1G846	Female	Male	-14.6178	5.89275	1.36496e-09	6.14324e-07	#N/A
MSTRG.12902.3	Petfic_v00_mik.OX345642.1G390	Female	Male	-14.592	5.86739	0.000560292	0.0174215	#N/A
MSTRG.14247.3	Petfic_v00_mik.OX345643.1G728	Female	Male	-14.5859	5.86096	3.59162e-13	5.01957e-10	#N/A
MSTRG.14941.6	Petfic_v00_mik.OX345644.1G694	Female	Male	-14.1801	5.45588	1.18361e-20	6.28594e-17	#N/A
MSTRG.20076.2	Petfic_v00_mik.OX345650.1G794	Female	Male	-14.1093	5.38508	8.08238e-09	2.75153e-06	#N/A
MSTRG.21219.2	Petfic_v00_mik.OX345652.1G482	Female	Male	-14.0507	5.32637	1.07452e-07	2.33875e-05	#N/A
MSTRG.17849.4	Petfic_v00_mik.OX345648.1G202	Female	Male	-14.0308	5.30671	3.78955e-17	9.14797e-14	#N/A
MSTRG.12378.4	Petfic_v00_mik.OX345641.1G928	Female	Male	-13.7815	5.05788	8.01951e-12	6.31125e-09	#N/A
MSTRG.3534.3	Petfic_v00_mik.OX345636.1G4206	Female	Male	-13.7306	5.00704	6.83086e-22	6.04622e-18	#N/A
MSTRG.21082.1	Petfic_v00_mik.OX345652.1G360	Female	Male	-13.7002	4.97665	6.03422e-07	8.52301e-05	#N/A
MSTRG.14941.8	Petfic_v00_mik.OX345644.1G694	Female	Male	-13.6476	4.92416	1.99673e-11	1.47281e-08	#N/A
Petfic_v00_mik.OX345642.1G580.1	Petfic_v00_mik.OX345642.1G579	Female	Male	-13.6125	4.8892	9.24886e-09	3.06993e-06	#N/A
MSTRG.11467.6	Petfic_v00_mik.OX345640.1G972	Female	Male	-13.608	4.88469	5.86009e-18	1.94511e-14	#N/A
MSTRG.20091.3	Petfic_v00_mik.OX345651.1G14	Female	Male	-13.6024	4.87916	3.7998e-09	1.42113e-06	#N/A
MSTRG.10852.2	Petfic_v00_mik.OX345640.1G398	Female	Male	-13.5794	4.8567	0.000754071	0.0223682	#N/A
MSTRG.21190.2	Petfic_v00_mik.OX345652.1G462	Female	Male	-13.5111	4.78808	5.64087e-08	1.3742e-05	#N/A
MSTRG.20285.4	Petfic_v00_mik.OX345651.1G196	Female	Male	-13.4236	4.70136	0.000827151	0.0240046	#N/A
MSTRG.14929.2	0	Female	Male	-13.4136	4.69098	0.000689372	0.0207077	#N/A
Petfic_v00_mik.OX345645.1G266.1	Petfic_v00_mik.OX345645.1G266	Female	Male	-13.2966	4.57381	1.0877e-07	2.34819e-05	#N/A
MSTRG.13089.2	Petfic_v00_mik.OX345642.1G598	Female	Male	-13.2846	4.56244	5.54678e-05	0.00281086	#N/A
MSTRG.17207.2	Petfic_v00_mik.OX345647.1G249	Female	Male	-13.2581	4.53519	4.84946e-07	7.15403e-05	#N/A
MSTRG.11642.13	Petfic_v00_mik.OX345641.1G143	Female	Male	-13.2484	4.52622	1.04761e-06	0.00013184	#N/A
MSTRG.6853.5	Petfic_v00_mik.OX345637.1G929	Female	Male	-13.2348	4.51328	0.000983753	0.0274974	#N/A
MSTRG.11565.4	Petfic_v00_mik.OX345641.1G73	Female	Male	-13.1848	4.46261	2.91669e-07	4.74982e-05	#N/A
MSTRG.20570.2	Petfic_v00_mik.OX345651.1G484	Female	Male	-13.1815	4.46007	0.000888325	0.0253641	#N/A
MSTRG.21114.1	Petfic_v00_mik.OX345652.1G385	Female	Male	-13.1739	4.45188	1.66394e-21	1.1046e-17	#N/A
MSTRG.11565.6	Petfic_v00_mik.OX345641.1G73	Female	Male	-13.1383	4.41603	1.73316e-10	9.08241e-08	#N/A
MSTRG.20357.9	Petfic_v00_mik.OX345651.1G270	Female	Male	-13.1247	4.40334	0.00125041	0.0331042	#N/A
MSTRG.14274.3	Petfic_v00_mik.OX345643.1G760	Female	Male	-13.1128	4.39108	4.79902e-05	0.00250853	#N/A
MSTRG.10433.2	Petfic_v00_mik.OX345639.1G1484	Female	Male	-13.0539	4.33227	7.94061e-07	0.000106492	#N/A
MSTRG.14449.1	Petfic_v00_mik.OX345644.1G37	Female	Male	-12.9472	4.22593	5.98032e-09	2.08949e-06	#N/A
MSTRG.15704.1	Petfic_v00_mik.OX345645.1G377	Female	Male	-12.9248	4.20238	8.3009e-06	0.000640762	#N/A
MSTRG.9063.2	Petfic_v00_mik.OX345639.1G89	Female	Male	-12.8891	4.16807	2.12178e-09	9.21325e-07	#N/A
Petfic_v00_mik.OX345642.1G579.1	Petfic_v00_mik.OX345642.1G579	Female	Male	-12.8154	4.09441	8.32539e-08	1.95639e-05	#N/A
MSTRG.6634.3	Petfic_v00_mik.OX345637.1G760	Female	Male	-12.7703	4.0495	4.35709e-10	2.14256e-07	#N/A
Petfic_v00_mik.OX345642.1G977.1	Petfic_v00_mik.OX345642.1G977	Female	Male	-12.7313	4.01167	0.00109922	0.0299064	#N/A
MSTRG.4220.17	Petfic_v00_mik.OX345636.1G4978	Female	Male	-12.6994	3.97978	0.00121463	0.0325134	#N/A
MSTRG.11741.5	Petfic_v00_mik.OX345641.1G254	Female	Male	-12.6884	8.9204	0.000578937	0.0179173	#N/A
MSTRG.18324.2	Petfic_v00_mik.OX345648.1G691.1	Female	Male	-12.6235	3.90449	0.00114523	0.0308735	#N/A
MSTRG.6164.8	Petfic_v00_mik.OX345637.1G201	Female	Male	-12.6208	3.90195	0.00126402	0.0333647	#N/A
Petfic_v00_mik.OX345647.1G40.1	Petfic_v00_mik.OX345647.1G39	Female	Male	-12.6175	3.89726	0.000335136	0.0115574	#N/A
MSTRG.19028.1	Petfic_v00_mik.OX345649.1G536	Female	Male	-12.5962	3.87547	4.05777e-08	1.05637e-05	#N/A
MSTRG.16230.2	Petfic_v00_mik.OX345646.1G8	Female	Male	-12.5927	5.57767	4.03764e-08	1.05637e-05	#N/A
Petfic_v00_mik.OX345641.1G133.2	Petfic_v00_mik.OX345641.1G133	Female	Male	-12.5209	3.79979	3.15295e-05	0.00180828	#N/A
MSTRG.20751.4	Petfic_v00_mik.OX345652.1G4	Female	Male	-12.5188	7.57856	9.27714e-06	0.000699844	#N/A
MSTRG.15717.5	Petfic_v00_mik.OX345645.1G387	Female	Male	-12.4785	3.76026	0.00123231	0.0328139	#N/A
MSTRG.11565.5	Petfic_v00_mik.OX345641.1G73	Female	Male	-12.4399	3.72034	1.65498e-07	3.20777e-05	#N/A
Petfic_v00_mik.OX345648.1G479.1	Petfic_v00_mik.OX345648.1G476	Female	Male	-12.4244	3.70636	0.00128355	0.0337795	#N/A
MSTRG.6547.1	Petfic_v00_mik.OX345637.1G690	Female	Male	-12.3989	3.68079	0.00169972	0.0413319	#N/A
MSTRG.10452.6	Petfic_v00_mik.OX345639.1G1492	Female	Male	-12.31	3.59241	0.00186085	0.0445162	#N/A
MSTRG.13089.7	Petfic_v00_mik.OX345642.1G598	Female	Male	-12.2577	3.53952	3.72118e-06	0.000340732	#N/A
Petfic_v00_mik.OX345640.1G579.1	Petfic_v00_mik.OX345640.1G579	Female	Male	-12.1024	3.38346	1.86355e-05	0.00120108	#N/A
Petfic_v00_mik.OX345641.1G148.1	Petfic_v00_mik.OX345641.1G143	Female	Male	-12.0565	3.33969	8.50269e-06	0.000650664	#N/A
MSTRG.8438.2	Petfic_v00_mik.OX345638.1G773	Female	Male	-12.0559	3.34075	0.00173084	0.041935	#N/A
Petfic_v00_mik.OX345641.1G975.2	Petfic_v00_mik.OX345641.1G975	Female	Male	-12.0489	3.33196	2.07817e-13	3.24611e-10	#N/A
MSTRG.17091.8	Petfic_v00_mik.OX345647.1G94	Female	Male	-11.9761	3.26	5.17751e-08	1.30937e-05	#N/A
MSTRG.18398.2	Petfic_v00_mik.OX345648.1G756	Female	Male	-11.8847	6.93642	6.15536e-07	8.54167e-05	#N/A
MSTRG.12378.5	Petfic_v00_mik.OX345641.1G928	Female	Male	-11.8677	3.15267	1.97147e-05	0.0012524	#N/A
MSTRG.10741.2	Petfic_v00_mik.OX345640.1G274	Female	Male	-11.7991	3.08359	8.14206e-07	0.000108411	#N/A
MSTRG.13077.1	0	Female	Male	-11.7977	3.08213	4.10729e-07	6.26811e-05	#N/A
Petfic_v00_mik.OX345646.1G97.2	Petfic_v00_mik.OX345646.1G97	Female	Male	-11.7639	3.04827	5.19844e-06	0.000443857	#N/A
MSTRG.11408.1	Petfic_v00_mik.OX345640.1G950	Female	Male	-11.6365	2.92492	0.001942	0.0460016	#N/A
MSTRG.7805.3	Petfic_v00_mik.OX345638.1G44	Female	Male	-11.5522	2.83964	0.000144246	0.00588372	#N/A
MSTRG.13486.4	Petfic_v00_mik.OX345642.1G998	Female	Male	-11.5312	2.8202	0.00213287	0.0495072	#N/A
MSTRG.21576.2	Petfic_v00_mik.OX345653.1G151	Female	Male	-11.5189	8.4186	8.74942e-09	2.94091e-06	#N/A
MSTRG.13955.1	Petfic_v00_mik.OX345643.1G456	Female	Male	-11.5062	2.7938	5.65909e-11	3.66516e-08	#N/A
MSTRG.16425.13	Petfic_v00_mik.OX345646.1G201	Female	Male	-11.4477	2.73821	0.00214946	0.0498052	#N/A
MSTRG.7655.5	Petfic_v00_mik.OX345637.1G1762	Female	Male	-11.4365	2.72679	0.00203088	0.0475975	#N/A
MSTRG.15696.1	Petfic_v00_mik.OX345645.1G371	Female	Male	-11.368	9.75903	0.00156359	0.0391324	#N/A
MSTRG.13869.2	Petfic_v00_mik.OX345643.1G353	Female	Male	-11.3676	2.65695	0.000184795	0.00711167	#N/A
Petfic_v00_mik.OX345636.1G2081.2	Petfic_v00_mik.OX345636.1G2081	Female	Male	-11.365	2.6539	1.00113e-11	7.59539e-09	#N/A
MSTRG.9304.5	Petfic_v00_mik.OX345639.1G323	Female	Male	-11.3369	2.62653	2.07908e-05	0.00130881	#N/A
MSTRG.10032.1	Petfic_v00_mik.OX345639.1G1049	Female	Male	-11.3152	10.2927	8.95869e-05	0.00403197	#N/A
Petfic_v00_mik.OX345638.1G244.2	Petfic_v00_mik.OX345638.1G243	Female	Male	-11.2446	6.64242	0.000201503	0.00760045	#N/A
MSTRG.8091.1	Petfic_v00_mik.OX345638.1G334	Female	Male	-11.2375	2.5262	3.03608e-06	0.000291456	#N/A
MSTRG.9224.1	0	Female	Male	-11.2351	8.0308	0.000300647	0.0104907	#N/A
MSTRG.17091.7	Petfic_v00_mik.OX345647.1G94	Female	Male	-11.2224	2.51422	9.21059e-07	0.000119891	#N/A
Petfic_v00_mik.OX345643.1G394.3	Petfic_v00_mik.OX345643.1G394	Female	Male	-11.16	2.45069	5.41656e-06	0.00045665	#N/A
MSTRG.7898.3	Petfic_v00_mik.OX345638.1G135	Female	Male	-11.1174	2.41001	1.83978e-08	5.36853e-06	#N/A
Petfic_v00_mik.OX345641.1G845.1	Petfic_v00_mik.OX345641.1G845	Female	Male	-11.1074	2.39988	9.68349e-05	0.00426585	#N/A
MSTRG.11999.1	Petfic_v00_mik.OX345641.1G551	Female	Male	-11.0668	2.35939	1.70393e-10	9.08241e-08	#N/A
Petfic_v00_mik.OX345636.1G4215.1	Petfic_v00_mik.OX345636.1G4215	Female	Male	-11.062	2.35446	3.22818e-11	2.25582e-08	#N/A
MSTRG.13565.1	Petfic_v00_mik.OX345643.1G47	Female	Male	-11.0178	4.94126	4.40425e-06	0.000391139	#N/A
MSTRG.10431.1	0	Female	Male	-10.9734	2.26255	0.00105302	0.0289461	#N/A
MSTRG.13405.2	Petfic_v00_mik.OX345642.1G904	Female	Male	-10.9528	9.11712	0.00174217	0.0421326	#N/A
MSTRG.18710.2	Petfic_v00_mik.OX345649.1G229	Female	Male	-10.9494	2.24214	9.65058e-06	0.000723903	#N/A
MSTRG.18078.3	Petfic_v00_mik.OX345648.1G436	Female	Male	-10.9008	7.9649	1.37243e-05	0.000954021	#N/A
MSTRG.21785.3	Petfic_v00_mik.OX345653.1G371	Female	Male	-10.8165	2.11234	0.000444581	0.0144497	#N/A
MSTRG.19066.1	Petfic_v00_mik.OX345649.1G564	Female	Male	-10.8027	5.14227	7.23472e-05	0.00339418	#N/A
MSTRG.11107.2	Petfic_v00_mik.OX345640.1G646	Female	Male	-10.7867	2.08224	3.23111e-05	0.00183331	#N/A
MSTRG.18367.3	Petfic_v00_mik.OX345648.1G737	Female	Male	-10.776	2.07447	0.000151721	0.00609503	#N/A
Petfic_v00_mik.OX345642.1G522.1	Petfic_v00_mik.OX345642.1G521	Female	Male	-10.7456	2.04204	5.36867e-05	0.00274681	#N/A
MSTRG.14944.2	Petfic_v00_mik.OX345644.1G702	Female	Male	-10.6666	6.51489	3.34905e-05	0.00189214	#N/A
Petfic_v00_mik.OX345645.1G2.1	Petfic_v00_mik.OX345645.1G1.1	Female	Male	-10.6663	1.96635	0.000124467	0.00522133	#N/A
MSTRG.6814.3	0	Female	Male	-10.6015	3.56982	0.000180228	0.00695605	#N/A
Petfic_v00_mik.OX345645.1G3.1	Petfic_v00_mik.OX345645.1G3	Female	Male	-10.5318	1.83422	9.26529e-05	0.00414193	#N/A
Petfic_v00_mik.OX345639.1G1086.2	Petfic_v00_mik.OX345639.1G1086	Female	Male	-10.4886	1.79037	8.93904e-10	4.16434e-07	#N/A
MSTRG.4234.4	Petfic_v00_mik.OX345636.1G4999	Female	Male	-10.4812	1.78383	0.00014789	0.0059864	#N/A
Petfic_v00_mik.OX345636.1G1347.1	Petfic_v00_mik.OX345636.1G1347	Female	Male	-10.4245	1.72659	3.1269e-05	0.00179722	#N/A
Petfic_v00_mik.OX345640.1G963.1	Petfic_v00_mik.OX345640.1G963	Female	Male	-10.4236	1.72526	6.99865e-07	9.57949e-05	#N/A
MSTRG.21966.1	Petfic_v00_mik.OX345653.1G557	Female	Male	-10.3471	8.2429	0.00158353	0.0394827	#N/A
MSTRG.13089.5	Petfic_v00_mik.OX345642.1G598	Female	Male	-10.3417	1.64646	0.000192439	0.00735254	#N/A
MSTRG.13343.1	0	Female	Male	-10.3185	1.62132	4.13438e-05	0.00221786	#N/A
Petfic_v00_mik.OX345636.1G6959.1	Petfic_v00_mik.OX345636.1G6959	Female	Male	-10.3132	1.6206	9.79662e-05	0.00427861	#N/A
MSTRG.17883.2	0	Female	Male	-10.2837	1.58934	5.344e-09	1.91763e-06	#N/A
MSTRG.1440.11	Petfic_v00_mik.OX345636.1G1545	Female	Male	-10.2833	1.58958	5.75432e-09	2.03734e-06	#N/A
MSTRG.13869.5	Petfic_v00_mik.OX345643.1G353	Female	Male	-10.2644	4.19656	4.48265e-05	0.00238065	#N/A
MSTRG.9675.1	0	Female	Male	-10.2631	1.56509	0.000260899	0.00942573	#N/A
MSTRG.3536.1	Petfic_v00_mik.OX345636.1G4194	Female	Male	-10.2174	1.52307	2.74925e-06	0.000272402	#N/A
MSTRG.19425.13	Petfic_v00_mik.OX345650.1G103	Female	Male	-10.198	1.50941	0.000158688	0.00631753	#N/A
MSTRG.13012.4	Petfic_v00_mik.OX345642.1G521	Female	Male	-10.1879	1.49709	9.9299e-08	2.19732e-05	#N/A
MSTRG.20009.1	Petfic_v00_mik.OX345650.1G733	Female	Male	-10.1648	1.47274	0.00017015	0.00665414	#N/A
MSTRG.15270.2	Petfic_v00_mik.OX345644.1G941	Female	Male	-10.1584	8.75499	2.90531e-06	0.000283631	#N/A
MSTRG.21755.1	Petfic_v00_mik.OX345653.1G336	Female	Male	-10.1433	1.45293	1.09864e-06	0.000136963	#N/A
MSTRG.17302.3	Petfic_v00_mik.OX345647.1G345	Female	Male	-10.1371	5.75318	0.00132137	0.034569	#N/A
Petfic_v00_mik.OX345640.1G657.1	Petfic_v00_mik.OX345640.1G657	Female	Male	-10.0465	7.88841	8.34718e-05	0.00381764	#N/A
MSTRG.13037.3	Petfic_v00_mik.OX345642.1G552	Female	Male	-10.0319	1.34259	3.44001e-05	0.00192307	#N/A
MSTRG.13684.4	Petfic_v00_mik.OX345643.1G167	Female	Male	-9.92461	1.23636	0.000463034	0.0149761	#N/A
Petfic_v00_mik.OX345642.1G484.2	Petfic_v00_mik.OX345642.1G484	Female	Male	-9.91907	1.23369	9.02574e-06	0.00068477	#N/A
MSTRG.15350.3	Petfic_v00_mik.OX345645.1G1.1	Female	Male	-9.89496	4.42094	0.000216755	0.00804994	#N/A
Petfic_v00_mik.OX345642.1G919.1	Petfic_v00_mik.OX345642.1G919	Female	Male	-9.87485	10.4022	0.000426109	0.0139004	#N/A
MSTRG.6814.2	0	Female	Male	-9.86685	5.29135	5.99045e-05	0.00294529	#N/A
MSTRG.18692.1	Petfic_v00_mik.OX345649.1G209	Female	Male	-9.85802	1.17303	3.95747e-07	6.07437e-05	#N/A
Petfic_v00_mik.OX345642.1G1020.1	Petfic_v00_mik.OX345642.1G1020	Female	Male	-9.8104	5.34309	8.35297e-05	0.00381764	#N/A
MSTRG.14928.1	Petfic_v00_mik.OX345644.1G695	Female	Male	-9.78661	12.5531	9.70475e-05	0.00426618	#N/A
Petfic_v00_mik.OX345644.1G10.1	Petfic_v00_mik.OX345644.1G10	Female	Male	-9.76987	12.7806	4.84072e-05	0.00252535	#N/A
Petfic_v00_mik.OX345649.1G682.2	Petfic_v00_mik.OX345649.1G682	Female	Male	-9.76831	1.08743	5.60326e-08	1.3742e-05	#N/A
Petfic_v00_mik.OX345650.1G668.1	Petfic_v00_mik.OX345650.1G668	Female	Male	-9.75019	9.85752	2.23674e-07	3.85678e-05	#N/A
MSTRG.4179.3	Petfic_v00_mik.OX345636.1G4920	Female	Male	-9.73872	5.78676	3.75057e-11	2.55366e-08	#N/A
MSTRG.9926.3	Petfic_v00_mik.OX345639.1G942	Female	Male	-9.72506	1.03811	0.000277523	0.00987324	#N/A
MSTRG.6813.1	0	Female	Male	-9.71837	10.1935	0.00125656	0.0332338	#N/A
MSTRG.7472.3	Petfic_v00_mik.OX345637.1G1594	Female	Male	-9.66596	0.993075	1.64008e-05	0.00109424	#N/A
MSTRG.21540.2	Petfic_v00_mik.OX345653.1G120	Female	Male	-9.66361	0.984373	0.000150192	0.00604738	#N/A
Petfic_v00_mik.OX345637.1G864.1	Petfic_v00_mik.OX345637.1G864	Female	Male	-9.65082	11.7829	0.000193195	0.00737083	#N/A
MSTRG.13038.1	0	Female	Male	-9.64764	0.967707	0.000173991	0.00677443	#N/A
Petfic_v00_mik.OX345642.1G521.1	Petfic_v00_mik.OX345642.1G521	Female	Male	-9.6423	5.81418	0.000872844	0.0249758	#N/A
MSTRG.19436.1	Petfic_v00_mik.OX345650.1G123	Female	Male	-9.59632	6.17969	0.000693909	0.0208204	#N/A
MSTRG.15270.5	Petfic_v00_mik.OX345644.1G941	Female	Male	-9.58767	6.10959	0.000267797	0.00959659	#N/A
MSTRG.13070.4	Petfic_v00_mik.OX345642.1G579	Female	Male	-9.58115	0.907163	0.00176041	0.0424962	#N/A
Petfic_v00_mik.OX345639.1G514.1	Petfic_v00_mik.OX345639.1G514	Female	Male	-9.56336	9.70807	1.21026e-05	0.000859284	#N/A
MSTRG.6139.6	Petfic_v00_mik.OX345637.1G171	Female	Male	-9.5407	5.0408	3.64228e-05	0.00200388	#N/A
Petfic_v00_mik.OX345640.1G78.1	Petfic_v00_mik.OX345640.1G78	Female	Male	-9.52511	9.63293	1.09871e-07	2.35284e-05	#N/A
MSTRG.11042.1	Petfic_v00_mik.OX345640.1G579	Female	Male	-9.51262	3.21926	0.000119263	0.00505087	#N/A
MSTRG.8091.5	Petfic_v00_mik.OX345638.1G334	Female	Male	-9.47152	0.798793	5.68043e-06	0.000475019	#N/A
MSTRG.15740.1	0	Female	Male	-9.44977	0.778834	0.000362315	0.0122403	#N/A
MSTRG.1886.1	0	Female	Male	-9.41528	0.748302	0.000832579	0.0241094	#N/A
MSTRG.11565.2	Petfic_v00_mik.OX345641.1G73	Female	Male	-9.41105	7.50076	2.86834e-09	1.12913e-06	#N/A
Petfic_v00_mik.OX345640.1G646.1	Petfic_v00_mik.OX345640.1G646	Female	Male	-9.40852	6.59372	0.00136122	0.0354023	#N/A
MSTRG.14941.1	Petfic_v00_mik.OX345644.1G694	Female	Male	-9.4013	9.82466	0.00148962	0.037852	#N/A
Petfic_v00_mik.OX345653.1G151.2	Petfic_v00_mik.OX345653.1G151	Female	Male	-9.39979	2.48883	2.14245e-07	3.7428e-05	#N/A
Petfic_v00_mik.OX345640.1G99.1	Petfic_v00_mik.OX345640.1G99	Female	Male	-9.3904	11.8196	0.000175451	0.00682126	#N/A
Petfic_v00_mik.OX345643.1G394.1	Petfic_v00_mik.OX345643.1G394	Female	Male	-9.38926	10.1926	0.000583013	0.0179598	#N/A
MSTRG.13766.1	Petfic_v00_mik.OX345643.1G279	Female	Male	-9.38314	5.1035	0.000232172	0.00853893	#N/A
MSTRG.3534.5	Petfic_v00_mik.OX345636.1G4206	Female	Male	-9.37368	0.706657	1.46378e-06	0.000168265	#N/A
MSTRG.13517.2	Petfic_v00_mik.OX345642.1G1021	Female	Male	-9.32004	0.659382	0.000213147	0.0079493	#N/A
MSTRG.9260.1	0	Female	Male	-9.31867	0.650135	0.000246584	0.00896957	#N/A
Petfic_v00_mik.OX345641.1G844.1	Petfic_v00_mik.OX345641.1G844	Female	Male	-9.315	10.298	5.50695e-06	0.000462758	#N/A
MSTRG.8455.1	Petfic_v00_mik.OX345638.1G711	Female	Male	-9.31351	0.651146	2.93967e-07	4.74982e-05	#N/A
MSTRG.12639.3	Petfic_v00_mik.OX345642.1G148	Female	Male	-9.28596	8.30821	0.00123379	0.0328139	#N/A
Petfic_v00_mik.OX345643.1G788.2	Petfic_v00_mik.OX345643.1G788	Female	Male	-9.27694	0.610234	0.000202321	0.00762047	#N/A
MSTRG.20098.1	0	Female	Male	-9.26943	9.01639	6.91717e-07	9.51702e-05	#N/A
Petfic_v00_mik.OX345641.1G827.1	Petfic_v00_mik.OX345641.1G827	Female	Male	-9.2671	0.603728	5.8191e-05	0.00288823	#N/A
MSTRG.1397.2	Petfic_v00_mik.OX345636.1G1535	Female	Male	-9.26693	4.7976	3.69416e-06	0.000339429	#N/A
MSTRG.739.4	Petfic_v00_mik.OX345636.1G858	Female	Male	-9.25646	0.597626	0.000289832	0.0101905	#N/A
MSTRG.13089.8	Petfic_v00_mik.OX345642.1G598	Female	Male	-9.25416	0.591756	0.00109052	0.0297307	#N/A
MSTRG.14867.1	0	Female	Male	-9.25228	7.75666	1.49747e-08	4.51861e-06	#N/A
MSTRG.13869.8	Petfic_v00_mik.OX345643.1G353	Female	Male	-9.22855	0.565136	0.000340467	0.0117019	#N/A
MSTRG.1986.1	0	Female	Male	-9.22692	0.565174	0.000720568	0.021523	#N/A
MSTRG.17320.11	Petfic_v00_mik.OX345647.1G361	Female	Male	-9.22113	0.559367	1.52023e-06	0.000173254	#N/A
MSTRG.19453.8	Petfic_v00_mik.OX345650.1G156	Female	Male	-9.20345	0.545465	1.58688e-07	3.12134e-05	#N/A
Petfic_v00_mik.OX345645.1G411.1	Petfic_v00_mik.OX345645.1G411	Female	Male	-9.18064	3.99884	0.000105633	0.00455353	#N/A
Petfic_v00_mik.OX345636.1G1527.1	Petfic_v00_mik.OX345636.1G1527	Female	Male	-9.16658	7.7123	0.000154443	0.00617632	#N/A
MSTRG.22034.1	Petfic_v00_mik.OX345653.1G619	Female	Male	-9.15809	9.46111	6.90777e-05	0.0032834	#N/A
MSTRG.4220.16	Petfic_v00_mik.OX345636.1G4978	Female	Male	-9.1473	4.21408	0.00092349	0.0261154	#N/A
MSTRG.21931.2	Petfic_v00_mik.OX345653.1G511	Female	Male	-9.11306	5.71926	1.82234e-05	0.00118314	#N/A
MSTRG.14941.5	Petfic_v00_mik.OX345644.1G694	Female	Male	-9.10895	7.66353	3.00152e-05	0.00175374	#N/A
Petfic_v00_mik.OX345639.1G709.1	Petfic_v00_mik.OX345639.1G709	Female	Male	-9.10431	0.446955	0.000362124	0.0122403	#N/A
Petfic_v00_mik.OX345648.1G84.1	Petfic_v00_mik.OX345648.1G83	Female	Male	-9.07582	0.423634	7.49509e-07	0.000101543	#N/A
MSTRG.21401.5	Petfic_v00_mik.OX345652.1G674	Female	Male	-9.05285	7.30234	0.000285678	0.0100742	#N/A
Petfic_v00_mik.OX345640.1G968.1	Petfic_v00_mik.OX345640.1G968	Female	Male	-9.03675	6.37079	3.47933e-05	0.00194097	#N/A
MSTRG.15270.8	Petfic_v00_mik.OX345644.1G941	Female	Male	-9.03106	5.44465	1.88637e-07	3.45453e-05	#N/A
Petfic_v00_mik.OX345647.1G623.1	Petfic_v00_mik.OX345647.1G623	Female	Male	-9.02456	10.6185	9.581e-08	2.13793e-05	#N/A
Petfic_v00_mik.OX345650.1G95.1	Petfic_v00_mik.OX345650.1G95	Female	Male	-8.99863	11.7387	5.93572e-07	8.47404e-05	#N/A
MSTRG.9553.1	0	Female	Male	-8.99631	10.4376	2.18053e-05	0.00135601	#N/A
Petfic_v00_mik.OX345638.1G867.1	Petfic_v00_mik.OX345638.1G866	Female	Male	-8.99001	2.09555	8.19751e-10	3.88708e-07	#N/A
Petfic_v00_mik.OX345639.1G942.1	Petfic_v00_mik.OX345639.1G942	Female	Male	-8.9742	0.324582	3.74161e-06	0.000341425	#N/A
Petfic_v00_mik.OX345650.1G123.1	Petfic_v00_mik.OX345650.1G123	Female	Male	-8.96596	9.73035	5.34771e-06	0.000455139	#N/A
MSTRG.11467.21	Petfic_v00_mik.OX345640.1G972	Female	Male	-8.9419	3.15242	2.72157e-06	0.000271141	#N/A
MSTRG.10032.3	Petfic_v00_mik.OX345639.1G1049	Female	Male	-8.94014	5.20924	0.00137855	0.0355398	#N/A
MSTRG.13512.1	0	Female	Male	-8.93999	0.301045	0.00201967	0.0474604	#N/A
MSTRG.4234.1	Petfic_v00_mik.OX345636.1G4999	Female	Male	-8.92162	3.6747	0.00123431	0.0328139	#N/A
Petfic_v00_mik.OX345645.1G345.1	Petfic_v00_mik.OX345645.1G345	Female	Male	-8.90305	12.2148	1.16201e-06	0.000141542	#N/A
MSTRG.5006.2	Petfic_v00_mik.OX345636.1G5966	Female	Male	-8.89445	3.65526	1.19855e-05	0.000855543	#N/A
MSTRG.1906.2	Petfic_v00_mik.OX345636.1G2147	Female	Male	-8.87961	0.24364	0.00103144	0.0285598	#N/A
MSTRG.20330.6	Petfic_v00_mik.OX345651.1G233	Female	Male	-8.86437	3.68172	0.000238985	0.00872241	#N/A
MSTRG.7794.1	Petfic_v00_mik.OX345638.1G32	Female	Male	-8.86187	4.11872	3.26289e-05	0.00184739	#N/A
Petfic_v00_mik.OX345642.1G552.2	Petfic_v00_mik.OX345642.1G552	Female	Male	-8.85003	5.21055	0.000780209	0.0229432	#N/A
Petfic_v00_mik.OX345642.1G846.1	Petfic_v00_mik.OX345642.1G846	Female	Male	-8.84625	9.05919	1.31973e-06	0.000157148	#N/A
MSTRG.13368.1	Petfic_v00_mik.OX345642.1G869	Female	Male	-8.83879	7.82222	1.65671e-06	0.000186408	#N/A
MSTRG.14337.1	Petfic_v00_mik.OX345643.1G808	Female	Male	-8.82371	7.94625	1.7533e-08	5.173e-06	#N/A
MSTRG.9460.2	Petfic_v00_mik.OX345639.1G479	Female	Male	-8.78023	5.26873	0.00123831	0.0328821	#N/A
MSTRG.11536.5	Petfic_v00_mik.OX345641.1G33	Female	Male	-8.7708	0.133646	0.000521483	0.0164459	#N/A
MSTRG.20050.1	0	Female	Male	-8.76469	5.59272	1.73954e-07	3.29463e-05	#N/A
MSTRG.17917.19	Petfic_v00_mik.OX345648.1G246	Female	Male	-8.75051	0.1229	7.91387e-05	0.00367386	#N/A
Petfic_v00_mik.OX345639.1G470.1	Petfic_v00_mik.OX345639.1G470	Female	Male	-8.6986	12.0121	7.72195e-06	0.000603085	#N/A
MSTRG.20397.7	Petfic_v00_mik.OX345651.1G293	Female	Male	-8.69086	0.0603698	9.94133e-06	0.00073741	#N/A
MSTRG.15270.7	Petfic_v00_mik.OX345644.1G941	Female	Male	-8.6871	6.85857	1.74731e-05	0.00115132	#N/A
Petfic_v00_mik.OX345650.1G360.1	Petfic_v00_mik.OX345650.1G360	Female	Male	-8.6436	11.2163	4.14357e-07	6.28734e-05	#N/A
MSTRG.20626.1	0	Female	Male	-8.62109	0.00401621	0.000481154	0.0154348	#N/A
Petfic_v00_mik.OX345647.1G679.1	Petfic_v00_mik.OX345647.1G679	Female	Male	-8.55741	8.88121	3.71468e-08	9.86397e-06	#N/A
MSTRG.13766.2	Petfic_v00_mik.OX345643.1G279	Female	Male	-8.54026	1.54395	0.000580882	0.0179358	#N/A
MSTRG.20751.6	Petfic_v00_mik.OX345652.1G4	Female	Male	-8.5157	5.18532	0.00124301	0.0329738	#N/A
Petfic_v00_mik.OX345645.1G104.2	Petfic_v00_mik.OX345645.1G104	Female	Male	-8.48942	-0.131336	0.000166715	0.0065323	#N/A
Petfic_v00_mik.OX345644.1G941.1	Petfic_v00_mik.OX345644.1G941	Female	Male	-8.47764	10.9106	1.5514e-07	3.08225e-05	#N/A
Petfic_v00_mik.OX345642.1G989.1	Petfic_v00_mik.OX345642.1G989	Female	Male	-8.42504	9.64783	2.70062e-07	4.53875e-05	#N/A
MSTRG.18356.8	Petfic_v00_mik.OX345648.1G727	Female	Male	-8.42097	2.18354	1.04352e-07	2.29005e-05	#N/A
Petfic_v00_mik.OX345638.1G1006.1	Petfic_v00_mik.OX345638.1G1006	Female	Male	-8.38194	11.3289	2.06776e-07	3.66049e-05	#N/A
MSTRG.16564.1	Petfic_v00_mik.OX345646.1G368	Female	Male	-8.29568	9.13694	2.28421e-06	0.000236612	#N/A
Petfic_v00_mik.OX345645.1G412.1	Petfic_v00_mik.OX345645.1G412	Female	Male	-8.28161	6.73409	7.08665e-07	9.65021e-05	#N/A
Petfic_v00_mik.OX345636.1G303.1	Petfic_v00_mik.OX345636.1G303	Female	Male	-8.28116	2.48586	7.87111e-05	0.00366041	#N/A
MSTRG.3999.2	Petfic_v00_mik.OX345636.1G4779	Female	Male	-8.22808	3.79335	0.000257509	0.00931593	#N/A
Petfic_v00_mik.OX345636.1G6956.1	Petfic_v00_mik.OX345636.1G6956	Female	Male	-8.17437	3.9911	6.32431e-05	0.00307574	#N/A
Petfic_v00_mik.OX345644.1G694.1	Petfic_v00_mik.OX345644.1G694	Female	Male	-8.16499	7.98108	1.43298e-06	0.000165441	#N/A
MSTRG.16501.4	Petfic_v00_mik.OX345646.1G225	Female	Male	-8.16069	1.32341	0.000440591	0.0143376	#N/A
Petfic_v00_mik.OX345636.1G4833.1	Petfic_v00_mik.OX345636.1G4833	Female	Male	-8.15566	-0.430961	2.90312e-05	0.0017093	#N/A
MSTRG.2037.1	0	Female	Male	-8.14855	-0.446693	0.00154916	0.0389016	#N/A
Petfic_v00_mik.OX345653.1G343.1	Petfic_v00_mik.OX345653.1G343	Female	Male	-8.11493	6.93636	5.57763e-08	1.3742e-05	#N/A
MSTRG.20036.1	0	Female	Male	-8.07021	8.91982	3.35394e-08	9.08781e-06	#N/A
Petfic_v00_mik.OX345646.1G178.1	Petfic_v00_mik.OX345646.1G178	Female	Male	-8.04427	10.4337	1.30364e-07	2.70443e-05	#N/A
MSTRG.15980.3	Petfic_v00_mik.OX345645.1G782	Female	Male	-8.03773	-0.553121	0.00107129	0.0293268	#N/A
MSTRG.3061.1	0	Female	Male	-8.02094	3.95314	3.04119e-05	0.00176239	#N/A
Petfic_v00_mik.OX345650.1G373.1	Petfic_v00_mik.OX345650.1G373	Female	Male	-7.99959	3.13728	1.48216e-05	0.00100658	#N/A
MSTRG.13104.1	Petfic_v00_mik.OX345642.1G608	Female	Male	-7.98264	9.31187	3.0114e-05	0.00175374	#N/A
Petfic_v00_mik.OX345637.1G788.1	Petfic_v00_mik.OX345637.1G788	Female	Male	-7.96732	1.8675	0.000985824	0.0275264	#N/A
Petfic_v00_mik.OX345648.1G581.1	Petfic_v00_mik.OX345648.1G581	Female	Male	-7.94307	11.3984	1.10731e-06	0.000137399	#N/A
MSTRG.21834.1	Petfic_v00_mik.OX345653.1G420	Female	Male	-7.93117	5.73504	4.42795e-06	0.000391933	#N/A
MSTRG.11421.1	0	Female	Male	-7.91719	5.50612	1.49747e-05	0.00101438	#N/A
MSTRG.757.2	Petfic_v00_mik.OX345636.1G818	Female	Male	-7.89306	-0.674178	0.000126148	0.00526688	#N/A
Petfic_v00_mik.OX345639.1G1100.1	Petfic_v00_mik.OX345639.1G1100	Female	Male	-7.88978	2.72197	0.000364359	0.0122477	#N/A
MSTRG.15270.3	Petfic_v00_mik.OX345644.1G941	Female	Male	-7.87025	7.60922	1.64922e-07	3.20777e-05	#N/A
MSTRG.5804.1	Petfic_v00_mik.OX345636.1G6946	Female	Male	-7.80492	1.55927	4.76917e-05	0.00249784	#N/A
Petfic_v00_mik.OX345649.1G311.1	Petfic_v00_mik.OX345649.1G311	Female	Male	-7.80018	8.33116	2.95142e-07	4.74982e-05	#N/A
Petfic_v00_mik.OX345639.1G731.1	Petfic_v00_mik.OX345639.1G731	Female	Male	-7.80003	8.36691	2.60966e-07	4.41381e-05	#N/A
Petfic_v00_mik.OX345641.1G1035.1	Petfic_v00_mik.OX345641.1G1035	Female	Male	-7.79345	10.065	3.85994e-07	5.99397e-05	#N/A
Petfic_v00_mik.OX345641.1G237.1	Petfic_v00_mik.OX345641.1G237	Female	Male	-7.62666	9.21239	1.00414e-06	0.000128812	#N/A
Petfic_v00_mik.OX345639.1G861.1	Petfic_v00_mik.OX345639.1G861	Female	Male	-7.57062	6.19192	1.77424e-07	3.29463e-05	#N/A
Petfic_v00_mik.OX345644.1G119.2	Petfic_v00_mik.OX345644.1G119	Female	Male	-7.55805	9.5622	8.48124e-08	1.95835e-05	#N/A
MSTRG.7042.6	Petfic_v00_mik.OX345637.1G1184	Female	Male	-7.55417	10.0242	1.79498e-06	0.00019707	#N/A
Petfic_v00_mik.OX345639.1G72.1	Petfic_v00_mik.OX345639.1G72	Female	Male	-7.52696	9.36912	1.66829e-07	3.21013e-05	#N/A
Petfic_v00_mik.OX345649.1G103.1	Petfic_v00_mik.OX345649.1G103	Female	Male	-7.5024	7.92294	2.05609e-06	0.000219267	#N/A
Petfic_v00_mik.OX345647.1G622.1	Petfic_v00_mik.OX345647.1G622	Female	Male	-7.49571	7.30169	6.15407e-07	8.54167e-05	#N/A
Petfic_v00_mik.OX345636.1G2359.3	Petfic_v00_mik.OX345636.1G2359	Female	Male	-7.4942	10.3147	1.03492e-06	0.000131596	#N/A
MSTRG.3930.1	0	Female	Male	-7.47681	0.626519	0.00175856	0.0424902	#N/A
Petfic_v00_mik.OX345636.1G1448.1	Petfic_v00_mik.OX345636.1G1448	Female	Male	-7.46827	11.9817	5.97355e-07	8.48244e-05	#N/A
Petfic_v00_mik.OX345649.1G109.1	Petfic_v00_mik.OX345649.1G109	Female	Male	-7.46772	9.29931	3.54783e-07	5.5745e-05	#N/A
Petfic_v00_mik.OX345652.1G462.1	Petfic_v00_mik.OX345652.1G462	Female	Male	-7.44695	7.98797	2.56484e-07	4.36582e-05	#N/A
MSTRG.11421.2	0	Female	Male	-7.42578	5.41127	0.000628196	0.0191297	#N/A
MSTRG.10508.2	Petfic_v00_mik.OX345640.1G37	Female	Male	-7.41718	7.87513	9.97738e-05	0.00433616	#N/A
MSTRG.13089.3	Petfic_v00_mik.OX345642.1G598	Female	Male	-7.39622	2.30526	0.000363609	0.0122477	#N/A
Petfic_v00_mik.OX345649.1G372.1	Petfic_v00_mik.OX345649.1G372	Female	Male	-7.39615	6.01887	8.68579e-07	0.000113617	#N/A
MSTRG.17543.1	0	Female	Male	-7.36783	9.68256	1.66502e-06	0.000186552	#N/A
Petfic_v00_mik.OX345648.1G171.1	Petfic_v00_mik.OX345648.1G171	Female	Male	-7.35353	6.58608	1.54563e-05	0.00104434	#N/A
Petfic_v00_mik.OX345648.1G836.1	Petfic_v00_mik.OX345648.1G836	Female	Male	-7.33187	7.50919	2.72631e-06	0.000271141	#N/A
MSTRG.8555.1	Petfic_v00_mik.OX345638.1G831	Female	Male	-7.29355	9.032	1.41148e-06	0.000165112	#N/A
MSTRG.5805.1	0	Female	Male	-7.27694	4.39346	1.08077e-05	0.000792785	#N/A
MSTRG.19951.2	Petfic_v00_mik.OX345650.1G680	Female	Male	-7.2469	10.2873	7.11524e-06	0.000560647	#N/A
Petfic_v00_mik.OX345646.1G688.1	Petfic_v00_mik.OX345646.1G688	Female	Male	-7.23324	9.88388	8.59223e-07	0.00011295	#N/A
Petfic_v00_mik.OX345653.1G641.1	Petfic_v00_mik.OX345653.1G641	Female	Male	-7.22156	8.44614	6.81109e-06	0.000544764	#N/A
Petfic_v00_mik.OX345650.1G62.1	Petfic_v00_mik.OX345650.1G61	Female	Male	-7.18492	9.35953	2.56535e-06	0.000260997	#N/A
Petfic_v00_mik.OX345645.1G862.1	Petfic_v00_mik.OX345645.1G862	Female	Male	-7.17771	7.7771	5.67704e-07	8.19283e-05	#N/A
Petfic_v00_mik.OX345647.1G115.1	Petfic_v00_mik.OX345647.1G115	Female	Male	-7.17541	7.63206	0.00128911	0.0338745	#N/A
Petfic_v00_mik.OX345651.1G565.1	Petfic_v00_mik.OX345651.1G565	Female	Male	-7.17441	11.6661	4.34478e-07	6.45127e-05	#N/A
MSTRG.314.3	Petfic_v00_mik.OX345636.1G339	Female	Male	-7.17016	5.0424	1.09006e-17	2.89456e-14	#N/A
Petfic_v00_mik.OX345645.1G550.1	Petfic_v00_mik.OX345645.1G550	Female	Male	-7.16793	4.51814	6.18348e-06	0.000506779	#N/A
Petfic_v00_mik.OX345637.1G861.1	Petfic_v00_mik.OX345637.1G861	Female	Male	-7.13842	8.53116	4.928e-07	7.22973e-05	#N/A
Petfic_v00_mik.OX345639.1G58.1	Petfic_v00_mik.OX345639.1G57	Female	Male	-7.1377	1.83182	0.00211219	0.04907	#N/A
MSTRG.4878.1	0	Female	Male	-7.12304	3.89388	5.80682e-06	0.000483368	#N/A
MSTRG.20016.1	Petfic_v00_mik.OX345650.1G740	Female	Male	-7.10619	10.0294	2.6109e-06	0.00026416	#N/A
MSTRG.21612.7	Petfic_v00_mik.OX345653.1G188	Female	Male	-7.08271	3.19644	0.000263943	0.00949695	#N/A
Petfic_v00_mik.OX345651.1G81.1	Petfic_v00_mik.OX345651.1G81	Female	Male	-7.06748	7.86024	2.66474e-06	0.000268028	#N/A
Petfic_v00_mik.OX345641.1G908.1	Petfic_v00_mik.OX345641.1G908	Female	Male	-7.04251	2.52039	4.62076e-08	1.19126e-05	#N/A
Petfic_v00_mik.OX345639.1G651.1	Petfic_v00_mik.OX345639.1G651	Female	Male	-7.0373	8.53363	7.82837e-07	0.00010552	#N/A
Petfic_v00_mik.OX345653.1G663.1	Petfic_v00_mik.OX345653.1G663	Female	Male	-7.01778	8.52369	2.38635e-06	0.00024561	#N/A
Petfic_v00_mik.OX345644.1G456.1	Petfic_v00_mik.OX345644.1G456	Female	Male	-7.01587	5.30702	2.50246e-06	0.000255877	#N/A
MSTRG.19806.8	Petfic_v00_mik.OX345650.1G510	Female	Male	-7.00889	1.69901	0.000473043	0.0152627	#N/A
Petfic_v00_mik.OX345639.1G677.1	Petfic_v00_mik.OX345639.1G677	Female	Male	-6.9998	7.66375	5.41707e-06	0.00045665	#N/A
MSTRG.20397.6	Petfic_v00_mik.OX345651.1G293	Female	Male	-6.99807	0.181337	0.000824887	0.023965	#N/A
MSTRG.4179.1	Petfic_v00_mik.OX345636.1G4920	Female	Male	-6.98142	7.89995	6.04431e-05	0.00296127	#N/A
MSTRG.17937.15	Petfic_v00_mik.OX345648.1G270	Female	Male	-6.96598	2.92973	0.00102683	0.0284917	#N/A
Petfic_v00_mik.OX345648.1G353.1	Petfic_v00_mik.OX345648.1G353	Female	Male	-6.96136	8.11011	8.16531e-07	0.000108411	#N/A
MSTRG.6186.1	Petfic_v00_mik.OX345637.1G257	Female	Male	-6.94785	4.96743	0.00114679	0.0308841	#N/A
Petfic_v00_mik.OX345646.1G153.1	Petfic_v00_mik.OX345646.1G153	Female	Male	-6.94657	8.58932	5.2684e-07	7.64465e-05	#N/A
Petfic_v00_mik.OX345642.1G25.1	Petfic_v00_mik.OX345642.1G25	Female	Male	-6.93683	7.50472	1.20545e-06	0.00014484	#N/A
Petfic_v00_mik.OX345652.1G366.1	Petfic_v00_mik.OX345652.1G366	Female	Male	-6.93341	8.27087	1.91329e-07	3.47983e-05	#N/A
MSTRG.20330.7	Petfic_v00_mik.OX345651.1G233	Female	Male	-6.93214	3.21877	0.00159938	0.0397658	#N/A
MSTRG.6139.2	Petfic_v00_mik.OX345637.1G171	Female	Male	-6.90857	2.83307	0.000203881	0.00766834	#N/A
Petfic_v00_mik.OX345643.1G879.1	Petfic_v00_mik.OX345643.1G879	Female	Male	-6.90635	5.3201	1.55067e-06	0.000175867	#N/A
Petfic_v00_mik.OX345646.1G368.1	Petfic_v00_mik.OX345646.1G368	Female	Male	-6.89895	9.08238	2.08307e-06	0.000221255	#N/A
Petfic_v00_mik.OX345653.1G261.1	Petfic_v00_mik.OX345653.1G261	Female	Male	-6.88668	9.45888	1.34487e-06	0.000158718	#N/A
Petfic_v00_mik.OX345636.1G4545.1	Petfic_v00_mik.OX345636.1G4545	Female	Male	-6.88124	7.57818	3.6786e-06	0.000339172	#N/A
Petfic_v00_mik.OX345645.1G538.1	Petfic_v00_mik.OX345645.1G538	Female	Male	-6.87947	10.0643	1.33229e-06	0.000157936	#N/A
Petfic_v00_mik.OX345642.1G796.1	Petfic_v00_mik.OX345642.1G796	Female	Male	-6.87598	7.11302	1.97105e-06	0.000211046	#N/A
MSTRG.2202.4	Petfic_v00_mik.OX345636.1G2527	Female	Male	-6.87043	2.42226	0.000277124	0.00987324	#N/A
MSTRG.9566.1	Petfic_v00_mik.OX345639.1G592	Female	Male	-6.85802	9.05506	0.000360534	0.0122268	#N/A
Petfic_v00_mik.OX345653.1G103.1	Petfic_v00_mik.OX345653.1G103	Female	Male	-6.85556	7.45182	1.72379e-06	0.000191521	#N/A
Petfic_v00_mik.OX345646.1G690.1	Petfic_v00_mik.OX345646.1G690	Female	Male	-6.82165	8.72103	4.34879e-07	6.45127e-05	#N/A
Petfic_v00_mik.OX345649.1G255.1	Petfic_v00_mik.OX345649.1G255	Female	Male	-6.82072	2.56845	9.7159e-06	0.00072675	#N/A
Petfic_v00_mik.OX345648.1G20.1	Petfic_v00_mik.OX345648.1G20	Female	Male	-6.79484	6.76696	1.10426e-05	0.000805564	#N/A
Petfic_v00_mik.OX345637.1G821.1	Petfic_v00_mik.OX345637.1G821	Female	Male	-6.78129	7.99633	1.03576e-06	0.000131596	#N/A
MSTRG.4785.3	Petfic_v00_mik.OX345636.1G5631	Female	Male	-6.76616	4.77409	0.000101131	0.00438796	#N/A
Petfic_v00_mik.OX345649.1G373.1	Petfic_v00_mik.OX345649.1G373	Female	Male	-6.76037	5.12701	2.29002e-06	0.000236612	#N/A
Petfic_v00_mik.OX345637.1G902.1	Petfic_v00_mik.OX345637.1G902	Female	Male	-6.74188	10.0931	1.796e-06	0.00019707	#N/A
Petfic_v00_mik.OX345642.1G601.1	Petfic_v00_mik.OX345642.1G598	Female	Male	-6.72818	5.29623	2.15696e-06	0.000227285	#N/A
Petfic_v00_mik.OX345646.1G678.1	Petfic_v00_mik.OX345646.1G678	Female	Male	-6.72346	9.45352	1.42384e-06	0.000165441	#N/A
Petfic_v00_mik.OX345647.1G626.1	Petfic_v00_mik.OX345647.1G626	Female	Male	-6.72315	9.20967	5.68863e-06	0.000475019	#N/A
MSTRG.12848.1	Petfic_v00_mik.OX345642.1G346	Female	Male	-6.72198	8.35339	1.375e-07	2.8086e-05	#N/A
Petfic_v00_mik.OX345653.1G633.1	Petfic_v00_mik.OX345653.1G632	Female	Male	-6.69664	7.08117	2.22111e-06	0.000231986	#N/A
Petfic_v00_mik.OX345638.1G1014.1	Petfic_v00_mik.OX345638.1G1014	Female	Male	-6.68938	7.52309	2.17971e-05	0.00135601	#N/A
Petfic_v00_mik.OX345640.1G11.1	Petfic_v00_mik.OX345640.1G11	Female	Male	-6.6677	9.38047	0.000363323	0.0122477	#N/A
MSTRG.15588.3	0	Female	Male	-6.66341	0.984839	9.41429e-05	0.00418923	#N/A
Petfic_v00_mik.OX345643.1G98.1	Petfic_v00_mik.OX345643.1G98	Female	Male	-6.66099	6.72407	1.36955e-06	0.000160917	#N/A
Petfic_v00_mik.OX345645.1G109.1	Petfic_v00_mik.OX345645.1G109	Female	Male	-6.6606	10.1791	1.28324e-06	0.000153492	#N/A
Petfic_v00_mik.OX345649.1G688.1	Petfic_v00_mik.OX345649.1G688	Female	Male	-6.64957	8.39959	2.18089e-06	0.000228898	#N/A
Petfic_v00_mik.OX345642.1G850.1	Petfic_v00_mik.OX345642.1G850	Female	Male	-6.63515	8.44924	2.92651e-06	0.000284654	#N/A
Petfic_v00_mik.OX345637.1G421.1	Petfic_v00_mik.OX345637.1G421	Female	Male	-6.6285	5.10764	1.42055e-05	0.000977237	#N/A
MSTRG.7805.2	Petfic_v00_mik.OX345638.1G44	Female	Male	-6.62566	4.70359	0.0011403	0.030772	#N/A
Petfic_v00_mik.OX345653.1G170.1	Petfic_v00_mik.OX345653.1G170	Female	Male	-6.61766	8.26052	1.03789e-05	0.000765557	#N/A
Petfic_v00_mik.OX345648.1G674.1	Petfic_v00_mik.OX345648.1G674	Female	Male	-6.61506	9.69308	3.4349e-05	0.00192307	#N/A
Petfic_v00_mik.OX345650.1G81.1	Petfic_v00_mik.OX345650.1G81	Female	Male	-6.61234	10.6168	4.14161e-06	0.000374069	#N/A
Petfic_v00_mik.OX345645.1G32.1	Petfic_v00_mik.OX345645.1G32	Female	Male	-6.61182	8.15361	5.50534e-05	0.0027952	#N/A
Petfic_v00_mik.OX345647.1G419.1	Petfic_v00_mik.OX345647.1G419	Female	Male	-6.61129	9.23727	6.1761e-07	8.54167e-05	#N/A
Petfic_v00_mik.OX345652.1G90.1	Petfic_v00_mik.OX345652.1G90	Female	Male	-6.60954	8.87386	1.4296e-06	0.000165441	#N/A
Petfic_v00_mik.OX345640.1G393.1	Petfic_v00_mik.OX345640.1G393	Female	Male	-6.60438	10.449	2.22778e-06	0.000231986	#N/A
Petfic_v00_mik.OX345640.1G965.1	Petfic_v00_mik.OX345640.1G965	Female	Male	-6.59248	7.05374	1.76048e-05	0.00115713	#N/A
MSTRG.3999.3	Petfic_v00_mik.OX345636.1G4779	Female	Male	-6.57555	3.6624	9.47449e-05	0.00420009	#N/A
Petfic_v00_mik.OX345636.1G5143.1	Petfic_v00_mik.OX345636.1G5143	Female	Male	-6.54059	4.18589	0.000892715	0.0254154	#N/A
MSTRG.12646.1	Petfic_v00_mik.OX345642.1G159	Female	Male	-6.53561	9.09187	0.000568587	0.0176176	#N/A
Petfic_v00_mik.OX345636.1G4778.1	Petfic_v00_mik.OX345636.1G4778	Female	Male	-6.52811	6.74777	9.63979e-06	0.000723903	#N/A
Petfic_v00_mik.OX345637.1G495.1	Petfic_v00_mik.OX345637.1G495	Female	Male	-6.49896	9.9487	2.86635e-06	0.000281901	#N/A
MSTRG.17630.1	Petfic_v00_mik.OX345647.1G679	Female	Male	-6.4728	7.80103	1.37799e-05	0.000955381	#N/A
Petfic_v00_mik.OX345649.1G648.1	Petfic_v00_mik.OX345649.1G648	Female	Male	-6.46459	7.93689	1.08977e-05	0.000797182	#N/A
Petfic_v00_mik.OX345646.1G711.1	Petfic_v00_mik.OX345646.1G711	Female	Male	-6.4636	9.30514	1.95621e-06	0.000210305	#N/A
Petfic_v00_mik.OX345637.1G1188.1	Petfic_v00_mik.OX345637.1G1184	Female	Male	-6.46245	14.0776	9.94173e-06	0.00073741	#N/A
MSTRG.7888.5	Petfic_v00_mik.OX345638.1G129	Female	Male	-6.46085	2.34759	0.000525807	0.016543	#N/A
Petfic_v00_mik.OX345636.1G2511.1	Petfic_v00_mik.OX345636.1G2511	Female	Male	-6.45675	9.23132	1.00249e-06	0.000128812	#N/A
Petfic_v00_mik.OX345651.1G575.1	Petfic_v00_mik.OX345651.1G575	Female	Male	-6.4381	8.59891	2.8609e-06	0.000281901	#N/A
Petfic_v00_mik.OX345643.1G756.1	Petfic_v00_mik.OX345643.1G756	Female	Male	-6.39788	7.67089	1.83805e-05	0.00119043	#N/A
Petfic_v00_mik.OX345637.1G1838.1	Petfic_v00_mik.OX345637.1G1838	Female	Male	-6.38025	9.57898	1.20747e-05	0.000859284	#N/A
MSTRG.19010.1	Petfic_v00_mik.OX345649.1G511	Female	Male	-6.37005	10.1687	4.66228e-06	0.000409392	#N/A
Petfic_v00_mik.OX345649.1G307.1	Petfic_v00_mik.OX345649.1G307	Female	Male	-6.36243	6.0912	4.67145e-06	0.000409392	#N/A
Petfic_v00_mik.OX345639.1G607.1	Petfic_v00_mik.OX345639.1G607	Female	Male	-6.3582	10.4091	3.18799e-06	0.00030126	#N/A
Petfic_v00_mik.OX345639.1G1483.1	Petfic_v00_mik.OX345639.1G1483	Female	Male	-6.33038	8.14643	0.000525223	0.016543	#N/A
Petfic_v00_mik.OX345643.1G849.1	Petfic_v00_mik.OX345643.1G849	Female	Male	-6.32916	5.45716	1.66612e-05	0.00110882	#N/A
Petfic_v00_mik.OX345649.1G230.1	Petfic_v00_mik.OX345649.1G230	Female	Male	-6.30448	5.59868	9.2112e-06	0.00069685	#N/A
MSTRG.19747.3	Petfic_v00_mik.OX345650.1G481	Female	Male	-6.27239	5.90587	4.97879e-05	0.00258216	#N/A
MSTRG.21089.1	Petfic_v00_mik.OX345652.1G367	Female	Male	-6.27068	7.80875	1.8836e-05	0.00121107	#N/A
Petfic_v00_mik.OX345644.1G135.1	Petfic_v00_mik.OX345644.1G135	Female	Male	-6.24844	9.77566	2.99828e-06	0.000290571	#N/A
Petfic_v00_mik.OX345651.1G199.1	Petfic_v00_mik.OX345651.1G199	Female	Male	-6.2436	4.7906	8.10707e-06	0.000627624	#N/A
MSTRG.2202.3	Petfic_v00_mik.OX345636.1G2527	Female	Male	-6.24251	4.13182	0.00103593	0.0285947	#N/A
Petfic_v00_mik.OX345642.1G114.1	Petfic_v00_mik.OX345642.1G114	Female	Male	-6.2272	8.87225	5.17188e-06	0.000443013	#N/A
Petfic_v00_mik.OX345650.1G680.1	Petfic_v00_mik.OX345650.1G680	Female	Male	-6.21914	7.26047	5.11678e-05	0.00264341	#N/A
Petfic_v00_mik.OX345637.1G503.1	Petfic_v00_mik.OX345637.1G503	Female	Male	-6.21312	4.10539	0.000634967	0.0192917	#N/A
Petfic_v00_mik.OX345639.1G806.1	Petfic_v00_mik.OX345639.1G806	Female	Male	-6.20252	9.56127	6.33015e-06	0.000514039	#N/A
MSTRG.11424.3	Petfic_v00_mik.OX345640.1G966	Female	Male	-6.1885	3.02821	3.53841e-06	0.000327383	#N/A
Petfic_v00_mik.OX345641.1G259.1	Petfic_v00_mik.OX345641.1G259	Female	Male	-6.18645	9.14782	5.03511e-06	0.000432694	#N/A
Petfic_v00_mik.OX345651.1G224.1	Petfic_v00_mik.OX345651.1G224	Female	Male	-6.182	10.7152	3.14307e-06	0.000299782	#N/A
MSTRG.19744.1	Petfic_v00_mik.OX345650.1G480	Female	Male	-6.16843	6.92246	2.71859e-06	0.000271141	#N/A
Petfic_v00_mik.OX345646.1G44.1	Petfic_v00_mik.OX345646.1G44	Female	Male	-6.16803	6.03268	8.69421e-06	0.000663408	#N/A
MSTRG.4785.4	Petfic_v00_mik.OX345636.1G5631	Female	Male	-6.14723	2.16661	7.83335e-05	0.00364924	#N/A
MSTRG.9177.2	Petfic_v00_mik.OX345639.1G186	Female	Male	-6.13863	1.41514	0.000723315	0.0215566	#N/A
Petfic_v00_mik.OX345649.1G92.2	Petfic_v00_mik.OX345649.1G92	Female	Male	-6.13611	6.65906	0.000102268	0.00443005	#N/A
Petfic_v00_mik.OX345649.1G626.1	Petfic_v00_mik.OX345649.1G626	Female	Male	-6.13576	6.31987	3.41254e-06	0.000317314	#N/A
MSTRG.8657.1	Petfic_v00_mik.OX345638.1G1018	Female	Male	-6.09375	9.74695	8.78124e-06	0.000668129	#N/A
MSTRG.9256.2	Petfic_v00_mik.OX345639.1G259	Female	Male	-6.09218	5.76912	8.46895e-06	0.000649955	#N/A
Petfic_v00_mik.OX345636.1G3119.1	Petfic_v00_mik.OX345636.1G3119	Female	Male	-6.07743	8.36051	4.95649e-06	0.000428711	#N/A
Petfic_v00_mik.OX345639.1G76.1	Petfic_v00_mik.OX345639.1G76	Female	Male	-6.07488	8.42189	6.92178e-06	0.000548023	#N/A
Petfic_v00_mik.OX345637.1G257.1	Petfic_v00_mik.OX345637.1G257	Female	Male	-6.07208	8.36714	2.7106e-05	0.00162901	#N/A
MSTRG.7043.2	0	Female	Male	-6.06147	10.5331	1.38669e-05	0.000958912	#N/A
MSTRG.7042.1	Petfic_v00_mik.OX345637.1G1184	Female	Male	-6.04016	12.5489	2.20993e-05	0.00137108	#N/A
Petfic_v00_mik.OX345651.1G629.1	Petfic_v00_mik.OX345651.1G629	Female	Male	-6.02768	9.49702	6.36893e-06	0.000515612	#N/A
Petfic_v00_mik.OX345644.1G762.1	Petfic_v00_mik.OX345644.1G762	Female	Male	-6.01703	7.17443	5.99878e-06	0.000496235	#N/A
MSTRG.11467.5	Petfic_v00_mik.OX345640.1G972	Female	Male	-6.00796	0.955948	0.00134382	0.0350186	#N/A
Petfic_v00_mik.OX345637.1G505.1	Petfic_v00_mik.OX345637.1G503	Female	Male	-5.998	4.66444	0.000418062	0.0136715	#N/A
Petfic_v00_mik.OX345639.1G90.1	Petfic_v00_mik.OX345639.1G90	Female	Male	-5.97763	9.06233	3.01163e-05	0.00175374	#N/A
MSTRG.6139.8	Petfic_v00_mik.OX345637.1G171	Female	Male	-5.97599	1.09147	0.0018459	0.0442384	#N/A
Petfic_v00_mik.OX345637.1G501.1	Petfic_v00_mik.OX345637.1G501	Female	Male	-5.96104	5.87131	0.000349166	0.0119328	#N/A
Petfic_v00_mik.OX345639.1G761.1	Petfic_v00_mik.OX345639.1G761	Female	Male	-5.93389	9.3428	7.52865e-06	0.000589722	#N/A
Petfic_v00_mik.OX345652.1G87.1	Petfic_v00_mik.OX345652.1G87	Female	Male	-5.93197	8.52411	4.05175e-06	0.000367694	#N/A
MSTRG.15227.1	Petfic_v00_mik.OX345644.1G889	Female	Male	-5.92856	8.593	3.02119e-06	0.000291456	#N/A
Petfic_v00_mik.OX345652.1G85.1	Petfic_v00_mik.OX345652.1G85	Female	Male	-5.91121	6.7711	3.39503e-06	0.000317314	#N/A
Petfic_v00_mik.OX345636.1G563.2	Petfic_v00_mik.OX345636.1G563	Female	Male	-5.91031	6.84095	3.04034e-06	0.000291456	#N/A
Petfic_v00_mik.OX345644.1G455.1	Petfic_v00_mik.OX345644.1G455	Female	Male	-5.88947	7.56014	8.33957e-06	0.000641881	#N/A
Petfic_v00_mik.OX345636.1G6048.1	Petfic_v00_mik.OX345636.1G6048	Female	Male	-5.88271	6.90918	2.89267e-06	0.000283439	#N/A
MSTRG.19010.2	Petfic_v00_mik.OX345649.1G511	Female	Male	-5.8769	7.65768	5.25265e-05	0.00269785	#N/A
Petfic_v00_mik.OX345648.1G804.1	Petfic_v00_mik.OX345648.1G804	Female	Male	-5.85691	7.70869	8.14659e-05	0.00376872	#N/A
Petfic_v00_mik.OX345641.1G399.1	Petfic_v00_mik.OX345641.1G399	Female	Male	-5.85288	7.5514	1.39499e-05	0.000962142	#N/A
MSTRG.9778.1	Petfic_v00_mik.OX345639.1G794	Female	Male	-5.83404	10.0312	6.25386e-06	0.000509402	#N/A
Petfic_v00_mik.OX345649.1G516.1	Petfic_v00_mik.OX345649.1G516	Female	Male	-5.79218	7.4113	3.64493e-05	0.00200388	#N/A
Petfic_v00_mik.OX345643.1G34.1	Petfic_v00_mik.OX345643.1G34	Female	Male	-5.78325	5.29711	4.65405e-05	0.00245206	#N/A
Petfic_v00_mik.OX345636.1G5637.1	Petfic_v00_mik.OX345636.1G5631	Female	Male	-5.7823	3.6647	0.000134304	0.00553776	#N/A
Petfic_v00_mik.OX345645.1G175.1	Petfic_v00_mik.OX345645.1G175	Female	Male	-5.76837	7.99075	7.054e-05	0.00333879	#N/A
Petfic_v00_mik.OX345639.1G723.1	Petfic_v00_mik.OX345639.1G723	Female	Male	-5.75682	8.63779	1.36509e-05	0.000951408	#N/A
Petfic_v00_mik.OX345647.1G291.1	Petfic_v00_mik.OX345647.1G291	Female	Male	-5.74744	7.16553	0.000194646	0.00741554	#N/A
MSTRG.13386.1	0	Female	Male	-5.74085	1.57194	0.00137674	0.0355275	#N/A
Petfic_v00_mik.OX345639.1G259.1	Petfic_v00_mik.OX345639.1G259	Female	Male	-5.72353	7.44274	7.8034e-06	0.000607658	#N/A
Petfic_v00_mik.OX345642.1G807.1	Petfic_v00_mik.OX345642.1G807	Female	Male	-5.70693	7.10248	4.05441e-05	0.00219268	#N/A
Petfic_v00_mik.OX345645.1G194.1	Petfic_v00_mik.OX345645.1G194	Female	Male	-5.68817	6.27947	4.58122e-05	0.00241849	#N/A
MSTRG.15006.1	0	Female	Male	-5.68465	3.26741	5.83844e-05	0.00289242	#N/A
MSTRG.10322.1	Petfic_v00_mik.OX345639.1G1387	Female	Male	-5.66531	5.23069	1.71688e-05	0.00113691	#N/A
Petfic_v00_mik.OX345638.1G195.1	Petfic_v00_mik.OX345638.1G195	Female	Male	-5.66159	6.90617	8.89388e-05	0.00400965	#N/A
MSTRG.14359.1	Petfic_v00_mik.OX345643.1G846	Female	Male	-5.65642	0.410525	5.4067e-05	0.00275499	#N/A
Petfic_v00_mik.OX345653.1G283.1	Petfic_v00_mik.OX345653.1G283	Female	Male	-5.62858	7.31685	6.93439e-06	0.000548023	#N/A
MSTRG.14671.1	Petfic_v00_mik.OX345644.1G295	Female	Male	-5.62139	5.057	2.74865e-05	0.00164387	#N/A
MSTRG.7043.1	0	Female	Male	-5.61864	10.9306	6.80823e-05	0.00326328	#N/A
Petfic_v00_mik.OX345649.1G697.1	Petfic_v00_mik.OX345649.1G697	Female	Male	-5.61709	7.98398	2.75573e-05	0.0016444	#N/A
MSTRG.13490.1	Petfic_v00_mik.OX345642.1G1001	Female	Male	-5.61694	6.70108	9.31595e-05	0.00415757	#N/A
Petfic_v00_mik.OX345653.1G465.1	Petfic_v00_mik.OX345653.1G465	Female	Male	-5.61006	9.56711	1.17805e-05	0.00084775	#N/A
Petfic_v00_mik.OX345639.1G444.1	Petfic_v00_mik.OX345639.1G444	Female	Male	-5.5907	9.22173	2.84519e-05	0.00167892	#N/A
Petfic_v00_mik.OX345639.1G106.1	Petfic_v00_mik.OX345639.1G106	Female	Male	-5.58932	7.83953	0.000110892	0.00471896	#N/A
MSTRG.15074.1	Petfic_v00_mik.OX345644.1G545	Female	Male	-5.57464	5.51012	3.16161e-05	0.00180934	#N/A
Petfic_v00_mik.OX345636.1G2008.2	Petfic_v00_mik.OX345636.1G2008	Female	Male	-5.55811	6.77214	8.4277e-05	0.00384147	#N/A
MSTRG.15074.7	Petfic_v00_mik.OX345644.1G545	Female	Male	-5.54251	3.13106	0.00151792	0.0383146	#N/A
Petfic_v00_mik.OX345642.1G334.1	Petfic_v00_mik.OX345642.1G334	Female	Male	-5.53608	9.02669	1.43313e-05	0.00098334	#N/A
MSTRG.21787.2	Petfic_v00_mik.OX345653.1G372	Female	Male	-5.53426	6.00412	2.60464e-05	0.00158227	#N/A
Petfic_v00_mik.OX345653.1G420.1	Petfic_v00_mik.OX345653.1G420	Female	Male	-5.52968	3.97695	0.000153031	0.00612907	#N/A
MSTRG.12851.2	Petfic_v00_mik.OX345642.1G349	Female	Male	-5.49112	4.09746	0.000397192	0.0130694	#N/A
Petfic_v00_mik.OX345649.1G814.1	Petfic_v00_mik.OX345649.1G814	Female	Male	-5.45747	0.135143	0.000630554	0.0191795	#N/A
Petfic_v00_mik.OX345649.1G716.1	Petfic_v00_mik.OX345649.1G716	Female	Male	-5.45046	10.0017	7.9504e-06	0.000617295	#N/A
MSTRG.18504.1	0	Female	Male	-5.44733	5.57402	0.000106661	0.00459042	#N/A
Petfic_v00_mik.OX345649.1G149.1	Petfic_v00_mik.OX345649.1G149	Female	Male	-5.447	5.25065	9.8692e-06	0.000736143	#N/A
MSTRG.9256.1	Petfic_v00_mik.OX345639.1G259	Female	Male	-5.44617	7.76696	1.91638e-05	0.0012262	#N/A
Petfic_v00_mik.OX345643.1G108.1	Petfic_v00_mik.OX345643.1G108	Female	Male	-5.42533	7.6966	2.81954e-05	0.00167495	#N/A
Petfic_v00_mik.OX345653.1G155.1	Petfic_v00_mik.OX345653.1G155	Female	Male	-5.42432	7.0171	7.06636e-05	0.00333879	#N/A
Petfic_v00_mik.OX345647.1G45.1	Petfic_v00_mik.OX345647.1G45	Female	Male	-5.42298	8.6775	9.66023e-05	0.00426585	#N/A
Petfic_v00_mik.OX345639.1G552.1	Petfic_v00_mik.OX345639.1G552	Female	Male	-5.41206	9.35614	6.87777e-06	0.000548023	#N/A
Petfic_v00_mik.OX345642.1G1001.1	Petfic_v00_mik.OX345642.1G1001	Female	Male	-5.36542	9.34898	0.000160502	0.00637065	#N/A
Petfic_v00_mik.OX345636.1G5835.1	Petfic_v00_mik.OX345636.1G5835	Female	Male	-5.362	7.16395	5.58615e-05	0.00282005	#N/A
MSTRG.14309.1	Petfic_v00_mik.OX345643.1G788	Female	Male	-5.34958	8.79268	6.86233e-05	0.00327738	#N/A
Petfic_v00_mik.OX345653.1G120.1	Petfic_v00_mik.OX345653.1G120	Female	Male	-5.34942	7.11208	5.86171e-05	0.00289854	#N/A
Petfic_v00_mik.OX345643.1G585.1	Petfic_v00_mik.OX345643.1G585	Female	Male	-5.34848	5.21815	3.63702e-05	0.00200388	#N/A
MSTRG.11058.1	Petfic_v00_mik.OX345640.1G596	Female	Male	-5.34084	6.84701	0.000293247	0.0102865	#N/A
Petfic_v00_mik.OX345637.1G709.1	Petfic_v00_mik.OX345637.1G709	Female	Male	-5.32091	11.9665	1.7376e-05	0.00114777	#N/A
Petfic_v00_mik.OX345639.1G270.1	Petfic_v00_mik.OX345639.1G270	Female	Male	-5.30731	6.33713	6.1016e-05	0.00297834	#N/A
Petfic_v00_mik.OX345639.1G545.1	Petfic_v00_mik.OX345639.1G545	Female	Male	-5.30545	5.5327	0.00010516	0.00454054	#N/A
Petfic_v00_mik.OX345636.1G4932.1	Petfic_v00_mik.OX345636.1G4932	Female	Male	-5.27993	8.8759	2.03089e-05	0.00128401	#N/A
Petfic_v00_mik.OX345649.1G92.1	Petfic_v00_mik.OX345649.1G92	Female	Male	-5.27877	8.68251	2.55119e-05	0.00155734	#N/A
Petfic_v00_mik.OX345649.1G78.1	Petfic_v00_mik.OX345649.1G78	Female	Male	-5.26828	7.79267	0.000113694	0.00483045	#N/A
MSTRG.13424.1	Petfic_v00_mik.OX345642.1G935	Female	Male	-5.25861	7.39126	2.15723e-07	3.74399e-05	#N/A
Petfic_v00_mik.OX345641.1G36.1	Petfic_v00_mik.OX345641.1G36	Female	Male	-5.23504	5.27787	4.42479e-05	0.00235936	#N/A
Petfic_v00_mik.OX345650.1G329.1	Petfic_v00_mik.OX345650.1G329	Female	Male	-5.2085	11.1174	3.12249e-05	0.00179722	#N/A
Petfic_v00_mik.OX345638.1G32.1	Petfic_v00_mik.OX345638.1G32	Female	Male	-5.20614	6.24342	2.07998e-05	0.00130881	#N/A
Petfic_v00_mik.OX345636.1G1912.1	Petfic_v00_mik.OX345636.1G1912	Female	Male	-5.20079	2.52855	0.000200328	0.00757764	#N/A
MSTRG.6766.1	0	Female	Male	-5.1955	1.81118	0.000239132	0.00872241	#N/A
Petfic_v00_mik.OX345636.1G6066.1	Petfic_v00_mik.OX345636.1G6066	Female	Male	-5.18457	6.24326	1.55008e-05	0.00104469	#N/A
MSTRG.3063.2	Petfic_v00_mik.OX345636.1G3828	Female	Male	-5.18279	1.81991	0.00156992	0.039254	#N/A
Petfic_v00_mik.OX345639.1G504.1	Petfic_v00_mik.OX345639.1G504	Female	Male	-5.182	8.12264	1.91303e-05	0.0012262	#N/A
Petfic_v00_mik.OX345642.1G11.1	Petfic_v00_mik.OX345642.1G11	Female	Male	-5.1735	6.60166	5.39233e-05	0.00275361	#N/A
Petfic_v00_mik.OX345651.1G113.1	Petfic_v00_mik.OX345651.1G113	Female	Male	-5.16545	7.54383	2.92718e-05	0.00171965	#N/A
MSTRG.17648.1	0	Female	Male	-5.16176	5.46084	3.19427e-05	0.00181629	#N/A
Petfic_v00_mik.OX345651.1G596.1	Petfic_v00_mik.OX345651.1G596	Female	Male	-5.16153	8.41719	2.60991e-05	0.00158227	#N/A
Petfic_v00_mik.OX345640.1G98.1	Petfic_v00_mik.OX345640.1G98	Female	Male	-5.16075	9.84401	2.09599e-05	0.00131327	#N/A
Petfic_v00_mik.OX345636.1G4210.1	Petfic_v00_mik.OX345636.1G4210	Female	Male	-5.15481	6.29413	1.10813e-05	0.000806176	#N/A
MSTRG.8025.8	Petfic_v00_mik.OX345638.1G274	Female	Male	-5.15428	7.30078	1.18125e-05	0.000847752	#N/A
Petfic_v00_mik.OX345653.1G625.1	Petfic_v00_mik.OX345653.1G624	Female	Male	-5.1523	5.97851	7.8234e-05	0.00364924	#N/A
MSTRG.16946.1	Petfic_v00_mik.OX345646.1G746	Female	Male	-5.12284	6.81052	2.73078e-05	0.00163686	#N/A
Petfic_v00_mik.OX345650.1G574.1	Petfic_v00_mik.OX345650.1G574	Female	Male	-5.10076	10.5541	1.45232e-05	0.000991387	#N/A
MSTRG.12072.1	0	Female	Male	-5.08269	1.65091	0.000777233	0.0229064	#N/A
MSTRG.7888.2	Petfic_v00_mik.OX345638.1G129	Female	Male	-5.07831	7.48319	0.00149873	0.0379744	#N/A
Petfic_v00_mik.OX345637.1G483.2	Petfic_v00_mik.OX345637.1G483	Female	Male	-5.06918	6.86615	0.00150547	0.038109	#N/A
Petfic_v00_mik.OX345650.1G455.1	Petfic_v00_mik.OX345650.1G455	Female	Male	-5.05545	5.33272	2.62875e-05	0.00158788	#N/A
MSTRG.16301.1	Petfic_v00_mik.OX345646.1G85	Female	Male	-5.03976	7.55212	3.39151e-05	0.00190801	#N/A
MSTRG.22033.1	Petfic_v00_mik.OX345653.1G632	Female	Male	-5.02638	6.80617	0.00155264	0.038903	#N/A
Petfic_v00_mik.OX345639.1G186.1	Petfic_v00_mik.OX345639.1G186	Female	Male	-4.97489	8.85437	6.06284e-05	0.00296487	#N/A
Petfic_v00_mik.OX345642.1G44.1	Petfic_v00_mik.OX345642.1G44	Female	Male	-4.97062	5.93897	0.000145699	0.00591331	#N/A
Petfic_v00_mik.OX345640.1G540.1	Petfic_v00_mik.OX345640.1G540	Female	Male	-4.96793	8.04124	0.00036822	0.0123456	#N/A
Petfic_v00_mik.OX345639.1G260.1	Petfic_v00_mik.OX345639.1G259	Female	Male	-4.96768	0.892861	0.000962828	0.0270128	#N/A
Petfic_v00_mik.OX345637.1G531.1	Petfic_v00_mik.OX345637.1G531	Female	Male	-4.96332	5.25974	4.90399e-05	0.00255334	#N/A
Petfic_v00_mik.OX345653.1G661.1	Petfic_v00_mik.OX345653.1G661	Female	Male	-4.94668	6.44109	3.04638e-05	0.00176239	#N/A
MSTRG.2724.1	0	Female	Male	-4.94238	3.71406	0.000332046	0.0114956	#N/A
Petfic_v00_mik.OX345643.1G356.1	Petfic_v00_mik.OX345643.1G353	Female	Male	-4.94015	1.09765	0.000186222	0.00714586	#N/A
Petfic_v00_mik.OX345638.1G410.2	Petfic_v00_mik.OX345638.1G410	Female	Male	-4.93804	3.24845	4.63421e-06	0.000408827	#N/A
MSTRG.2999.1	0	Female	Male	-4.92656	2.7883	0.000601214	0.0184136	#N/A
Petfic_v00_mik.OX345639.1G1101.1	Petfic_v00_mik.OX345639.1G1100	Female	Male	-4.9161	6.07612	0.000129975	0.00539276	#N/A
Petfic_v00_mik.OX345648.1G304.2	Petfic_v00_mik.OX345648.1G304	Female	Male	-4.91434	2.01638	0.000371506	0.0124088	#N/A
MSTRG.7992.3	Petfic_v00_mik.OX345638.1G243	Female	Male	-4.90567	8.17263	3.9875e-05	0.00216736	#N/A
Petfic_v00_mik.OX345642.1G485.1	Petfic_v00_mik.OX345642.1G485	Female	Male	-4.90093	6.81363	0.000262992	0.00947557	#N/A
MSTRG.13396.3	Petfic_v00_mik.OX345642.1G892	Female	Male	-4.88333	0.0178702	1.1222e-05	0.000814178	#N/A
MSTRG.8025.3	Petfic_v00_mik.OX345638.1G274	Female	Male	-4.87134	7.34173	3.17325e-05	0.0018121	#N/A
Petfic_v00_mik.OX345644.1G11.1	Petfic_v00_mik.OX345644.1G11	Female	Male	-4.86885	6.18248	0.000178664	0.00691582	#N/A
MSTRG.19747.1	Petfic_v00_mik.OX345650.1G481	Female	Male	-4.86813	3.99104	4.38711e-05	0.00234397	#N/A
MSTRG.15074.3	Petfic_v00_mik.OX345644.1G545	Female	Male	-4.86371	8.30196	4.181e-06	0.000375524	#N/A
Petfic_v00_mik.OX345653.1G159.2	Petfic_v00_mik.OX345653.1G159	Female	Male	-4.85755	3.57985	0.000905141	0.025706	#N/A
Petfic_v00_mik.OX345641.1G235.1	Petfic_v00_mik.OX345641.1G235	Female	Male	-4.85648	6.589	0.00014537	0.00591141	#N/A
MSTRG.17377.4	Petfic_v00_mik.OX345647.1G419	Female	Male	-4.85331	4.01382	0.000589883	0.0181084	#N/A
MSTRG.7776.2	Petfic_v00_mik.OX345638.1G22	Female	Male	-4.84771	7.07939	0.000234038	0.00858375	#N/A
MSTRG.7715.2	Petfic_v00_mik.OX345637.1G1881	Female	Male	-4.84653	7.78597	1.85606e-05	0.00119917	#N/A
Petfic_v00_mik.OX345636.1G320.2	Petfic_v00_mik.OX345636.1G320	Female	Male	-4.84398	7.09561	0.000158045	0.0063082	#N/A
Petfic_v00_mik.OX345649.1G379.1	Petfic_v00_mik.OX345649.1G379	Female	Male	-4.83049	6.72166	2.16981e-05	0.0013557	#N/A
Petfic_v00_mik.OX345643.1G864.1	Petfic_v00_mik.OX345643.1G864	Female	Male	-4.82243	5.53528	0.000134932	0.00554267	#N/A
MSTRG.12907.2	Petfic_v00_mik.OX345642.1G402	Female	Male	-4.81502	5.88862	0.000136038	0.00557462	#N/A
Petfic_v00_mik.OX345637.1G813.1	Petfic_v00_mik.OX345637.1G813	Female	Male	-4.80627	4.77872	0.000393482	0.0129957	#N/A
Petfic_v00_mik.OX345637.1G490.1	Petfic_v00_mik.OX345637.1G490	Female	Male	-4.77943	8.33571	1.81823e-05	0.00118314	#N/A
MSTRG.16951.1	Petfic_v00_mik.OX345646.1G749	Female	Male	-4.77709	5.45947	6.67944e-05	0.00321898	#N/A
Petfic_v00_mik.OX345636.1G4932.2	Petfic_v00_mik.OX345636.1G4932	Female	Male	-4.77422	2.55699	0.00171431	0.0415965	#N/A
Petfic_v00_mik.OX345650.1G84.1	Petfic_v00_mik.OX345650.1G84	Female	Male	-4.764	7.63054	0.00012658	0.00527661	#N/A
Petfic_v00_mik.OX345649.1G82.2	Petfic_v00_mik.OX345649.1G82	Female	Male	-4.76002	7.36561	0.000134544	0.00553904	#N/A
MSTRG.9337.1	0	Female	Male	-4.74328	7.36941	5.96643e-05	0.00294484	#N/A
Petfic_v00_mik.OX345643.1G664.1	Petfic_v00_mik.OX345643.1G664	Female	Male	-4.73018	7.65648	4.71438e-05	0.00247892	#N/A
Petfic_v00_mik.OX345651.1G639.1	Petfic_v00_mik.OX345651.1G639	Female	Male	-4.7241	5.91771	0.000391587	0.0129526	#N/A
Petfic_v00_mik.OX345649.1G826.1	Petfic_v00_mik.OX345649.1G826	Female	Male	-4.69722	7.44918	6.91204e-05	0.0032834	#N/A
Petfic_v00_mik.OX345650.1G133.1	Petfic_v00_mik.OX345650.1G133	Female	Male	-4.68985	8.81618	4.14968e-05	0.00222158	#N/A
Petfic_v00_mik.OX345637.1G1184.1	Petfic_v00_mik.OX345637.1G1184	Female	Male	-4.67741	9.56894	0.000176735	0.00686115	#N/A
MSTRG.10951.3	Petfic_v00_mik.OX345640.1G514	Female	Male	-4.66975	1.8056	0.000835041	0.0241543	#N/A
Petfic_v00_mik.OX345648.1G64.1	Petfic_v00_mik.OX345648.1G64	Female	Male	-4.66126	5.76021	0.000172499	0.00672618	#N/A
Petfic_v00_mik.OX345643.1G523.1	Petfic_v00_mik.OX345643.1G523	Female	Male	-4.65139	6.45505	6.20938e-05	0.00302539	#N/A
Petfic_v00_mik.OX345643.1G73.1	Petfic_v00_mik.OX345643.1G73	Female	Male	-4.64733	6.05098	0.000357803	0.0121497	#N/A
MSTRG.17819.3	Petfic_v00_mik.OX345648.1G173	Female	Male	-4.64225	2.05649	6.82808e-05	0.0032669	#N/A
Petfic_v00_mik.OX345641.1G133.1	Petfic_v00_mik.OX345641.1G133	Female	Male	-4.64002	6.9267	0.00136355	0.0354282	#N/A
Petfic_v00_mik.OX345638.1G317.1	Petfic_v00_mik.OX345638.1G317	Female	Male	-4.63792	5.02054	5.5581e-05	0.00281123	#N/A
Petfic_v00_mik.OX345649.1G525.1	Petfic_v00_mik.OX345649.1G525	Female	Male	-4.63149	7.9826	9.68709e-05	0.00426585	#N/A
Petfic_v00_mik.OX345642.1G131.1	Petfic_v00_mik.OX345642.1G131	Female	Male	-4.62687	13.7124	8.52656e-05	0.00387033	#N/A
MSTRG.8025.4	Petfic_v00_mik.OX345638.1G274	Female	Male	-4.61788	5.13625	0.000503335	0.0159494	#N/A
Petfic_v00_mik.OX345643.1G868.1	Petfic_v00_mik.OX345643.1G868	Female	Male	-4.61398	6.36805	8.31091e-05	0.00381764	#N/A
MSTRG.22041.4	Petfic_v00_mik.OX345653.1G638	Female	Male	-4.6063	4.51183	0.000558413	0.0174039	#N/A
Petfic_v00_mik.OX345636.1G6059.1	Petfic_v00_mik.OX345636.1G6059	Female	Male	-4.60136	3.01689	5.98163e-05	0.00294529	#N/A
Petfic_v00_mik.OX345653.1G372.1	Petfic_v00_mik.OX345653.1G372	Female	Male	-4.59537	7.76746	0.000461592	0.0149477	#N/A
Petfic_v00_mik.OX345636.1G4999.1	Petfic_v00_mik.OX345636.1G4999	Female	Male	-4.59337	6.61712	3.61305e-05	0.00199877	#N/A
MSTRG.16828.1	0	Female	Male	-4.57062	3.11095	0.000133655	0.00551957	#N/A
MSTRG.11515.1	Petfic_v00_mik.OX345641.1G36	Female	Male	-4.56548	4.29576	0.000481284	0.0154348	#N/A
Petfic_v00_mik.OX345651.1G50.1	Petfic_v00_mik.OX345651.1G50	Female	Male	-4.56434	6.37581	2.95271e-05	0.00173082	#N/A
Petfic_v00_mik.OX345651.1G14.1	Petfic_v00_mik.OX345651.1G14	Female	Male	-4.56065	4.83953	0.00012762	0.00530334	#N/A
Petfic_v00_mik.OX345639.1G96.1	Petfic_v00_mik.OX345639.1G96	Female	Male	-4.55746	6.23841	0.000131102	0.00543102	#N/A
MSTRG.7031.2	0	Female	Male	-4.55707	1.18441	0.00136761	0.0354297	#N/A
Petfic_v00_mik.OX345646.1G118.1	Petfic_v00_mik.OX345646.1G118	Female	Male	-4.54665	5.2952	0.000466986	0.0150856	#N/A
MSTRG.17878.1	0	Female	Male	-4.54227	3.3287	0.000461274	0.0149477	#N/A
Petfic_v00_mik.OX345649.1G502.1	Petfic_v00_mik.OX345649.1G502	Female	Male	-4.53335	7.25684	0.000352181	0.0120203	#N/A
Petfic_v00_mik.OX345653.1G31.1	Petfic_v00_mik.OX345653.1G31	Female	Male	-4.52551	6.81687	6.70557e-05	0.00322572	#N/A
Petfic_v00_mik.OX345636.1G5894.1	Petfic_v00_mik.OX345636.1G5894	Female	Male	-4.52458	5.07015	1.2285e-05	0.000867987	#N/A
Petfic_v00_mik.OX345646.1G680.1	Petfic_v00_mik.OX345646.1G680	Female	Male	-4.51884	5.73355	0.000252929	0.00916274	#N/A
MSTRG.9377.1	Petfic_v00_mik.OX345639.1G397	Female	Male	-4.50854	1.95527	0.00181133	0.0434883	#N/A
Petfic_v00_mik.OX345638.1G18.1	Petfic_v00_mik.OX345638.1G18	Female	Male	-4.5083	5.94949	7.18281e-05	0.00337579	#N/A
Petfic_v00_mik.OX345647.1G153.1	Petfic_v00_mik.OX345647.1G153	Female	Male	-4.48982	10.9173	5.60951e-05	0.00282647	#N/A
Petfic_v00_mik.OX345646.1G97.1	Petfic_v00_mik.OX345646.1G97	Female	Male	-4.4682	7.60184	0.000215641	0.00801979	#N/A
Petfic_v00_mik.OX345637.1G726.1	Petfic_v00_mik.OX345637.1G726	Female	Male	-4.45669	7.22717	9.72676e-05	0.00426618	#N/A
Petfic_v00_mik.OX345648.1G506.1	Petfic_v00_mik.OX345648.1G506	Female	Male	-4.45551	5.31013	5.77012e-05	0.0028855	#N/A
Petfic_v00_mik.OX345650.1G148.1	Petfic_v00_mik.OX345650.1G148	Female	Male	-4.45548	8.63241	0.000237458	0.00868522	#N/A
Petfic_v00_mik.OX345638.1G397.1	Petfic_v00_mik.OX345638.1G397	Female	Male	-4.43568	8.08991	3.89216e-05	0.00212869	#N/A
Petfic_v00_mik.OX345642.1G598.1	Petfic_v00_mik.OX345642.1G598	Female	Male	-4.43042	6.68137	0.000177532	0.00688204	#N/A
Petfic_v00_mik.OX345644.1G496.2	Petfic_v00_mik.OX345644.1G496	Female	Male	-4.42663	6.2851	0.000165559	0.00651298	#N/A
Petfic_v00_mik.OX345650.1G482.1	Petfic_v00_mik.OX345650.1G481	Female	Male	-4.40612	5.646	7.00553e-05	0.00332187	#N/A
Petfic_v00_mik.OX345644.1G37.1	Petfic_v00_mik.OX345644.1G37	Female	Male	-4.39994	7.3969	0.000396211	0.0130533	#N/A
MSTRG.12853.1	0	Female	Male	-4.39779	4.79445	0.000198404	0.00752631	#N/A
Petfic_v00_mik.OX345639.1G674.1	Petfic_v00_mik.OX345639.1G674	Female	Male	-4.39008	6.74064	0.000120886	0.00508716	#N/A
Petfic_v00_mik.OX345639.1G611.1	Petfic_v00_mik.OX345639.1G611	Female	Male	-4.37447	8.70318	5.79228e-05	0.00288571	#N/A
MSTRG.14434.1	Petfic_v00_mik.OX345644.1G11	Female	Male	-4.3733	3.84787	0.000306307	0.0106601	#N/A
MSTRG.11077.1	0	Female	Male	-4.37259	7.49254	0.000145183	0.00591141	#N/A
Petfic_v00_mik.OX345653.1G461.1	Petfic_v00_mik.OX345653.1G461	Female	Male	-4.36579	6.57798	0.000120799	0.00508716	#N/A
MSTRG.10687.1	Petfic_v00_mik.OX345640.1G212	Female	Male	-4.35619	7.66152	0.000282801	0.00999932	#N/A
MSTRG.19016.1	0	Female	Male	-4.34914	2.87655	0.00170128	0.0413319	#N/A
Petfic_v00_mik.OX345639.1G1353.1	Petfic_v00_mik.OX345639.1G1353	Female	Male	-4.34813	6.25752	0.00039461	0.0130167	#N/A
Petfic_v00_mik.OX345651.1G52.1	Petfic_v00_mik.OX345651.1G52	Female	Male	-4.34578	7.62066	0.000486673	0.01557	#N/A
MSTRG.21594.1	Petfic_v00_mik.OX345653.1G165	Female	Male	-4.34095	6.96395	0.00119707	0.0321053	#N/A
Petfic_v00_mik.OX345648.1G842.1	Petfic_v00_mik.OX345648.1G842	Female	Male	-4.33076	7.36353	0.000163944	0.00645902	#N/A
Petfic_v00_mik.OX345644.1G194.1	Petfic_v00_mik.OX345644.1G194	Female	Male	-4.32934	4.05571	0.0017372	0.0420506	#N/A
Petfic_v00_mik.OX345639.1G479.1	Petfic_v00_mik.OX345639.1G479	Female	Male	-4.32761	9.32562	0.000109024	0.00466187	#N/A
Petfic_v00_mik.OX345636.1G2527.1	Petfic_v00_mik.OX345636.1G2527	Female	Male	-4.31596	5.34675	0.00018968	0.00726804	#N/A
Petfic_v00_mik.OX345643.1G67.1	Petfic_v00_mik.OX345643.1G67	Female	Male	-4.31331	8.2344	0.000271793	0.00971359	#N/A
Petfic_v00_mik.OX345643.1G91.1	Petfic_v00_mik.OX345643.1G91	Female	Male	-4.29259	7.67923	0.000116148	0.00492681	#N/A
Petfic_v00_mik.OX345647.1G314.1	Petfic_v00_mik.OX345647.1G314	Female	Male	-4.28992	7.81774	6.41613e-05	0.0031147	#N/A
MSTRG.21661.1	Petfic_v00_mik.OX345653.1G242	Female	Male	-4.28368	7.72553	0.000166788	0.0065323	#N/A
Petfic_v00_mik.OX345642.1G484.1	Petfic_v00_mik.OX345642.1G484	Female	Male	-4.28263	8.36056	0.000201116	0.00759665	#N/A
Petfic_v00_mik.OX345639.1G845.1	Petfic_v00_mik.OX345639.1G845	Female	Male	-4.2764	8.60946	0.0010669	0.0292367	#N/A
Petfic_v00_mik.OX345648.1G737.1	Petfic_v00_mik.OX345648.1G737	Female	Male	-4.26511	6.98977	0.000212613	0.00794054	#N/A
Petfic_v00_mik.OX345647.1G628.1	Petfic_v00_mik.OX345647.1G628	Female	Male	-4.25548	5.9369	0.000152196	0.00610486	#N/A
MSTRG.13480.2	Petfic_v00_mik.OX345642.1G989	Female	Male	-4.25182	7.53188	0.000108008	0.00463335	#N/A
Petfic_v00_mik.OX345636.1G3283.1	Petfic_v00_mik.OX345636.1G3283	Female	Male	-4.25095	3.82435	0.000627614	0.0191297	#N/A
Petfic_v00_mik.OX345638.1G462.1	Petfic_v00_mik.OX345638.1G462	Female	Male	-4.24666	9.12262	4.52677e-05	0.00239928	#N/A
MSTRG.17452.2	Petfic_v00_mik.OX345647.1G501	Female	Male	-4.24047	9.26421	0.0001029	0.00445019	#N/A
MSTRG.17472.2	Petfic_v00_mik.OX345647.1G518	Female	Male	-4.22597	4.09034	0.00148438	0.0377912	#N/A
Petfic_v00_mik.OX345638.1G843.1	Petfic_v00_mik.OX345638.1G843	Female	Male	-4.22081	4.86588	0.000106849	0.00459105	#N/A
Petfic_v00_mik.OX345637.1G413.1	Petfic_v00_mik.OX345637.1G413	Female	Male	-4.19914	7.00174	0.000160295	0.00637065	#N/A
Petfic_v00_mik.OX345646.1G695.1	Petfic_v00_mik.OX345646.1G695	Female	Male	-4.19858	5.82889	0.000179576	0.006941	#N/A
Petfic_v00_mik.OX345646.1G113.1	Petfic_v00_mik.OX345646.1G113	Female	Male	-4.19465	10.4506	9.73603e-05	0.00426618	#N/A
Petfic_v00_mik.OX345640.1G181.1	Petfic_v00_mik.OX345640.1G181	Female	Male	-4.14806	6.04713	0.00018566	0.00713462	#N/A
MSTRG.12797.1	Petfic_v00_mik.OX345642.1G292	Female	Male	-4.14257	8.79317	6.55333e-05	0.00317549	#N/A
Petfic_v00_mik.OX345653.1G640.1	Petfic_v00_mik.OX345653.1G638	Female	Male	-4.12954	6.92851	0.000593784	0.0182071	#N/A
Petfic_v00_mik.OX345650.1G751.1	Petfic_v00_mik.OX345650.1G751	Female	Male	-4.11685	7.85788	0.00023354	0.00857735	#N/A
Petfic_v00_mik.OX345647.1G84.1	Petfic_v00_mik.OX345647.1G84	Female	Male	-4.11193	8.20572	0.000410702	0.0134639	#N/A
Petfic_v00_mik.OX345637.1G1185.1	Petfic_v00_mik.OX345637.1G1184	Female	Male	-4.10616	10.9524	0.000816898	0.023785	#N/A
Petfic_v00_mik.OX345651.1G527.2	Petfic_v00_mik.OX345651.1G527	Female	Male	-4.09259	6.94231	0.000281083	0.00996514	#N/A
Petfic_v00_mik.OX345653.1G569.1	Petfic_v00_mik.OX345653.1G569	Female	Male	-4.07592	7.60255	0.000322675	0.0112004	#N/A
Petfic_v00_mik.OX345639.1G967.1	Petfic_v00_mik.OX345639.1G967	Female	Male	-4.07271	5.67424	6.61005e-05	0.00319715	#N/A
Petfic_v00_mik.OX345646.1G32.1	Petfic_v00_mik.OX345646.1G32	Female	Male	-4.06624	8.026	0.000223699	0.00825593	#N/A
Petfic_v00_mik.OX345643.1G47.1	Petfic_v00_mik.OX345643.1G47	Female	Male	-4.05441	8.3072	0.000214173	0.00797635	#N/A
Petfic_v00_mik.OX345639.1G1099.1	Petfic_v00_mik.OX345639.1G1099	Female	Male	-4.04776	7.01612	0.000334003	0.0115483	#N/A
Petfic_v00_mik.OX345649.1G209.1	Petfic_v00_mik.OX345649.1G209	Female	Male	-4.03574	6.32099	0.000388977	0.0129435	#N/A
Petfic_v00_mik.OX345644.1G786.1	Petfic_v00_mik.OX345644.1G786	Female	Male	-4.03173	7.85422	0.000245099	0.0089278	#N/A
MSTRG.17656.1	Petfic_v00_mik.OX345647.1G699	Female	Male	-4.03159	5.34488	0.000487632	0.0155819	#N/A
Petfic_v00_mik.OX345640.1G775.1	Petfic_v00_mik.OX345640.1G775	Female	Male	-4.01596	3.6414	0.00169416	0.0412723	#N/A
MSTRG.7042.2	Petfic_v00_mik.OX345637.1G1184	Female	Male	-3.97013	10.8547	0.000473992	0.0152747	#N/A
Petfic_v00_mik.OX345638.1G334.1	Petfic_v00_mik.OX345638.1G334	Female	Male	-3.95692	6.54066	0.000546445	0.0170709	#N/A
Petfic_v00_mik.OX345649.1G815.1	Petfic_v00_mik.OX345649.1G815	Female	Male	-3.95397	4.74908	0.000399337	0.0131238	#N/A
Petfic_v00_mik.OX345636.1G3126.1	Petfic_v00_mik.OX345636.1G3126	Female	Male	-3.95101	6.31234	9.54112e-05	0.00422258	#N/A
MSTRG.21283.3	Petfic_v00_mik.OX345652.1G546	Female	Male	-3.93978	5.45621	0.000815748	0.023785	#N/A
Petfic_v00_mik.OX345653.1G159.1	Petfic_v00_mik.OX345653.1G159	Female	Male	-3.93917	9.07407	0.000109418	0.0046712	#N/A
Petfic_v00_mik.OX345644.1G76.1	Petfic_v00_mik.OX345644.1G76	Female	Male	-3.92515	9.0191	0.000261529	0.00943565	#N/A
Petfic_v00_mik.OX345641.1G871.1	Petfic_v00_mik.OX345641.1G871	Female	Male	-3.91592	3.28432	8.08956e-05	0.00374887	#N/A
Petfic_v00_mik.OX345650.1G481.1	Petfic_v00_mik.OX345650.1G481	Female	Male	-3.91095	4.56114	0.000148345	0.00599565	#N/A
Petfic_v00_mik.OX345652.1G613.1	Petfic_v00_mik.OX345652.1G613	Female	Male	-3.91058	5.01911	0.00126001	0.0332918	#N/A
MSTRG.14561.1	Petfic_v00_mik.OX345644.1G187	Female	Male	-3.88574	5.32624	0.000163236	0.00644067	#N/A
Petfic_v00_mik.OX345639.1G618.1	Petfic_v00_mik.OX345639.1G618	Female	Male	-3.88366	7.4527	0.00013505	0.00554267	#N/A
MSTRG.15016.6	Petfic_v00_mik.OX345644.1G786	Female	Male	-3.88133	3.6977	0.00136703	0.0354297	#N/A
MSTRG.18723.4	Petfic_v00_mik.OX345649.1G238	Female	Male	-3.88122	3.0224	0.00122713	0.0327489	#N/A
Petfic_v00_mik.OX345640.1G331.1	Petfic_v00_mik.OX345640.1G331	Female	Male	-3.85888	6.47656	0.000362157	0.0122403	#N/A
Petfic_v00_mik.OX345645.1G284.1	Petfic_v00_mik.OX345645.1G284	Female	Male	-3.85858	4.76355	0.000642885	0.0195099	#N/A
Petfic_v00_mik.OX345649.1G730.1	Petfic_v00_mik.OX345649.1G730	Female	Male	-3.84482	4.3097	0.00134173	0.0349982	#N/A
MSTRG.14481.1	0	Female	Male	-3.84207	2.47144	0.00161162	0.039958	#N/A
MSTRG.7326.1	Petfic_v00_mik.OX345637.1G1461	Female	Male	-3.83696	6.45675	0.000500861	0.0159074	#N/A
MSTRG.18794.3	Petfic_v00_mik.OX345649.1G307	Female	Male	-3.83684	2.33206	0.00137234	0.0354831	#N/A
MSTRG.12871.2	Petfic_v00_mik.OX345642.1G371	Female	Male	-3.82529	6.25759	0.000969636	0.02716	#N/A
MSTRG.6139.10	Petfic_v00_mik.OX345637.1G171	Female	Male	-3.80334	3.37414	0.00167764	0.0411708	#N/A
Petfic_v00_mik.OX345648.1G505.2	Petfic_v00_mik.OX345648.1G505	Female	Male	-3.801	7.36911	0.000338827	0.0116695	#N/A
Petfic_v00_mik.OX345638.1G9.1	Petfic_v00_mik.OX345638.1G9	Female	Male	-3.79421	5.39001	0.000290126	0.0101905	#N/A
Petfic_v00_mik.OX345648.1G307.1	Petfic_v00_mik.OX345648.1G307	Female	Male	-3.78067	3.97474	0.000990514	0.0276283	#N/A
MSTRG.17637.1	Petfic_v00_mik.OX345647.1G687	Female	Male	-3.76359	3.38617	0.00104277	0.0287238	#N/A
Petfic_v00_mik.OX345639.1G397.1	Petfic_v00_mik.OX345639.1G397	Female	Male	-3.75493	7.18841	0.000161039	0.00638245	#N/A
Petfic_v00_mik.OX345651.1G203.2	Petfic_v00_mik.OX345651.1G202	Female	Male	-3.75463	6.13476	0.000482745	0.015463	#N/A
Petfic_v00_mik.OX345646.1G81.1	Petfic_v00_mik.OX345646.1G81	Female	Male	-3.75038	5.26834	0.00103405	0.0285925	#N/A
Petfic_v00_mik.OX345653.1G352.1	Petfic_v00_mik.OX345653.1G352	Female	Male	-3.74369	5.5635	0.00133886	0.0349578	#N/A
MSTRG.10741.1	Petfic_v00_mik.OX345640.1G274	Female	Male	-3.73972	4.62357	0.00209671	0.0487532	#N/A
Petfic_v00_mik.OX345643.1G153.1	Petfic_v00_mik.OX345643.1G153	Female	Male	-3.73417	4.47647	0.00180482	0.0433713	#N/A
Petfic_v00_mik.OX345639.1G338.1	Petfic_v00_mik.OX345639.1G338	Female	Male	-3.7293	6.50387	0.00094799	0.0266662	#N/A
Petfic_v00_mik.OX345652.1G594.1	Petfic_v00_mik.OX345652.1G594	Female	Male	-3.72524	8.40036	0.000364378	0.0122477	#N/A
Petfic_v00_mik.OX345643.1G273.1	Petfic_v00_mik.OX345643.1G273	Female	Male	-3.72485	5.94615	0.000334505	0.0115506	#N/A
MSTRG.7013.4	Petfic_v00_mik.OX345637.1G1148	Female	Male	-3.72445	4.29832	9.91843e-05	0.00431761	#N/A
Petfic_v00_mik.OX345636.1G1231.1	Petfic_v00_mik.OX345636.1G1231	Female	Male	-3.72312	2.73122	0.000872393	0.0249758	#N/A
Petfic_v00_mik.OX345642.1G292.1	Petfic_v00_mik.OX345642.1G292	Female	Male	-3.71612	8.8405	0.000498053	0.0158387	#N/A
Petfic_v00_mik.OX345639.1G1082.1	Petfic_v00_mik.OX345639.1G1082	Female	Male	-3.70886	6.573	0.00130576	0.0342619	#N/A
Petfic_v00_mik.OX345639.1G770.1	Petfic_v00_mik.OX345639.1G770	Female	Male	-3.70303	8.38746	0.000530935	0.0166255	#N/A
MSTRG.18181.4	Petfic_v00_mik.OX345648.1G533	Female	Male	-3.69899	8.44147	0.000743311	0.0220926	#N/A
Petfic_v00_mik.OX345645.1G377.1	Petfic_v00_mik.OX345645.1G377	Female	Male	-3.69378	6.27335	0.00110062	0.0299139	#N/A
Petfic_v00_mik.OX345643.1G858.1	Petfic_v00_mik.OX345643.1G858	Female	Male	-3.68706	5.31439	0.0013841	0.0356248	#N/A
MSTRG.11347.2	Petfic_v00_mik.OX345640.1G881	Female	Male	-3.68023	0.252462	0.00149349	0.0379141	#N/A
Petfic_v00_mik.OX345642.1G40.1	Petfic_v00_mik.OX345642.1G40	Female	Male	-3.67374	7.06915	0.000684955	0.0206217	#N/A
Petfic_v00_mik.OX345651.1G76.1	Petfic_v00_mik.OX345651.1G76	Female	Male	-3.66405	6.73629	0.0014007	0.0359712	#N/A
Petfic_v00_mik.OX345653.1G74.1	Petfic_v00_mik.OX345653.1G74	Female	Male	-3.65982	6.59071	0.000205941	0.00772396	#N/A
Petfic_v00_mik.OX345644.1G496.1	Petfic_v00_mik.OX345644.1G496	Female	Male	-3.65434	6.28655	5.68829e-05	0.00285533	#N/A
MSTRG.12639.1	Petfic_v00_mik.OX345642.1G148	Female	Male	-3.65006	7.54213	3.56119e-05	0.00197832	#N/A
Petfic_v00_mik.OX345652.1G206.1	Petfic_v00_mik.OX345652.1G206	Female	Male	-3.64546	6.26075	0.00202362	0.0474692	#N/A
Petfic_v00_mik.OX345636.1G4840.1	Petfic_v00_mik.OX345636.1G4840	Female	Male	-3.64269	7.94434	0.000581699	0.0179401	#N/A
Petfic_v00_mik.OX345653.1G511.1	Petfic_v00_mik.OX345653.1G511	Female	Male	-3.63479	6.79674	0.000265738	0.00954647	#N/A
Petfic_v00_mik.OX345642.1G371.1	Petfic_v00_mik.OX345642.1G371	Female	Male	-3.6214	7.92506	0.00109756	0.029892	#N/A
Petfic_v00_mik.OX345637.1G688.1	Petfic_v00_mik.OX345637.1G688	Female	Male	-3.59804	3.8659	0.000217088	0.00805105	#N/A
Petfic_v00_mik.OX345650.1G352.1	Petfic_v00_mik.OX345650.1G352	Female	Male	-3.59726	5.4865	0.00111184	0.0301262	#N/A
MSTRG.22015.2	Petfic_v00_mik.OX345653.1G601	Female	Male	-3.59165	7.40599	0.000389963	0.0129526	#N/A
Petfic_v00_mik.OX345639.1G95.1	Petfic_v00_mik.OX345639.1G95	Female	Male	-3.57414	4.67593	0.0012653	0.0333652	#N/A
Petfic_v00_mik.OX345650.1G669.1	Petfic_v00_mik.OX345650.1G669	Female	Male	-3.57346	8.59168	0.000664513	0.0200745	#N/A
Petfic_v00_mik.OX345638.1G45.1	Petfic_v00_mik.OX345638.1G45	Female	Male	-3.5728	7.5442	0.000507356	0.0160576	#N/A
Petfic_v00_mik.OX345639.1G440.3	Petfic_v00_mik.OX345639.1G440	Female	Male	-3.56798	6.91946	0.000488609	0.0155944	#N/A
Petfic_v00_mik.OX345636.1G1959.1	Petfic_v00_mik.OX345636.1G1959	Female	Male	-3.54734	6.28533	0.00039169	0.0129526	#N/A
Petfic_v00_mik.OX345643.1G40.1	Petfic_v00_mik.OX345643.1G40	Female	Male	-3.54225	5.64275	0.00160565	0.0398845	#N/A
Petfic_v00_mik.OX345646.1G212.1	Petfic_v00_mik.OX345646.1G212	Female	Male	-3.53162	6.3563	0.000324516	0.0112496	#N/A
Petfic_v00_mik.OX345646.1G43.1	Petfic_v00_mik.OX345646.1G43	Female	Male	-3.52779	5.51488	0.000842872	0.0243279	#N/A
MSTRG.17066.13	Petfic_v00_mik.OX345647.1G127	Female	Male	-3.52749	1.41859	0.000371422	0.0124088	#N/A
Petfic_v00_mik.OX345639.1G592.1	Petfic_v00_mik.OX345639.1G592	Female	Male	-3.52448	5.89762	0.000379707	0.0126668	#N/A
Petfic_v00_mik.OX345639.1G1052.1	Petfic_v00_mik.OX345639.1G1049	Female	Male	-3.51783	9.24734	0.000682802	0.0206035	#N/A
MSTRG.15738.1	Petfic_v00_mik.OX345645.1G414	Female	Male	-3.51688	6.88791	0.000294778	0.0103236	#N/A
Petfic_v00_mik.OX345642.1G298.1	Petfic_v00_mik.OX345642.1G292	Female	Male	-3.50352	8.95598	0.00158147	0.0394827	#N/A
MSTRG.17951.8	Petfic_v00_mik.OX345648.1G304	Female	Male	-3.50046	5.66656	0.000625621	0.0190951	#N/A
Petfic_v00_mik.OX345638.1G793.1	Petfic_v00_mik.OX345638.1G793.1	Female	Male	-3.49827	1.10822	0.00142012	0.0363994	#N/A
Petfic_v00_mik.OX345640.1G94.1	Petfic_v00_mik.OX345640.1G94	Female	Male	-3.49213	5.47691	0.000916682	0.0259782	#N/A
MSTRG.14480.1	Petfic_v00_mik.OX345644.1G49	Female	Male	-3.46571	4.3886	0.0015124	0.0382116	#N/A
MSTRG.8473.2	Petfic_v00_mik.OX345638.1G724	Female	Male	-3.45864	0.413231	0.000501413	0.0159074	#N/A
Petfic_v00_mik.OX345636.1G1532.1	Petfic_v00_mik.OX345636.1G1532	Female	Male	-3.45493	6.74724	0.000447086	0.0145134	#N/A
MSTRG.11562.1	Petfic_v00_mik.OX345641.1G72	Female	Male	-3.45116	8.22713	0.000383931	0.0127916	#N/A
Petfic_v00_mik.OX345644.1G794.1	Petfic_v00_mik.OX345644.1G794	Female	Male	-3.45042	3.96218	0.00127174	0.0335017	#N/A
Petfic_v00_mik.OX345636.1G5146.1	Petfic_v00_mik.OX345636.1G5146	Female	Male	-3.43428	6.25697	0.000282077	0.00998702	#N/A
MSTRG.12669.1	Petfic_v00_mik.OX345642.1G214	Female	Male	-3.43208	7.37338	0.000391213	0.0129526	#N/A
Petfic_v00_mik.OX345649.1G522.1	Petfic_v00_mik.OX345649.1G522	Female	Male	-3.42885	5.95084	0.00199506	0.0470486	#N/A
Petfic_v00_mik.OX345648.1G306.1	Petfic_v00_mik.OX345648.1G304	Female	Male	-3.40214	5.12007	0.00119307	0.0320332	#N/A
Petfic_v00_mik.OX345650.1G109.1	Petfic_v00_mik.OX345650.1G109	Female	Male	-3.39571	6.39638	0.000566039	0.0175591	#N/A
Petfic_v00_mik.OX345636.1G3269.1	Petfic_v00_mik.OX345636.1G3269	Female	Male	-3.36784	8.27144	0.000584145	0.0179738	#N/A
MSTRG.15453.3	Petfic_v00_mik.OX345645.1G97	Female	Male	-3.36467	10.5169	0.000722297	0.0215504	#N/A
Petfic_v00_mik.OX345645.1G414.1	Petfic_v00_mik.OX345645.1G414	Female	Male	-3.36446	5.95563	0.000555591	0.0173363	#N/A
Petfic_v00_mik.OX345642.1G397.1	Petfic_v00_mik.OX345642.1G397	Female	Male	-3.35751	3.95048	0.000800621	0.0234396	#N/A
MSTRG.20330.5	Petfic_v00_mik.OX345651.1G233	Female	Male	-3.35456	5.41166	8.27766e-05	0.00380945	#N/A
Petfic_v00_mik.OX345648.1G29.1	Petfic_v00_mik.OX345648.1G29	Female	Male	-3.32876	7.52353	0.000806818	0.023595	#N/A
Petfic_v00_mik.OX345642.1G307.1	Petfic_v00_mik.OX345642.1G307	Female	Male	-3.31733	7.89535	9.09428e-05	0.00407922	#N/A
MSTRG.3539.1	Petfic_v00_mik.OX345636.1G4200	Female	Male	-3.31542	4.04037	0.000289062	0.01018	#N/A
Petfic_v00_mik.OX345651.1G82.1	Petfic_v00_mik.OX345651.1G82	Female	Male	-3.31098	8.2317	0.000645328	0.0195171	#N/A
Petfic_v00_mik.OX345648.1G847.1	Petfic_v00_mik.OX345648.1G847	Female	Male	-3.30879	8.95229	0.00119818	0.0321053	#N/A
Petfic_v00_mik.OX345646.1G139.1	Petfic_v00_mik.OX345646.1G139	Female	Male	-3.3028	4.68009	0.000425608	0.0139004	#N/A
Petfic_v00_mik.OX345648.1G761.1	Petfic_v00_mik.OX345648.1G761	Female	Male	-3.29644	7.1923	0.000743798	0.0220926	#N/A
Petfic_v00_mik.OX345649.1G439.1	Petfic_v00_mik.OX345649.1G439	Female	Male	-3.26308	8.82962	0.000718518	0.0215102	#N/A
Petfic_v00_mik.OX345653.1G165.1	Petfic_v00_mik.OX345653.1G165	Female	Male	-3.25967	8.77554	0.00116982	0.0314406	#N/A
Petfic_v00_mik.OX345643.1G684.1	Petfic_v00_mik.OX345643.1G684	Female	Male	-3.2575	4.53576	0.00148159	0.0377563	#N/A
Petfic_v00_mik.OX345642.1G222.1	Petfic_v00_mik.OX345642.1G222	Female	Male	-3.23725	5.5297	0.000119703	0.00505408	#N/A
Petfic_v00_mik.OX345649.1G824.1	Petfic_v00_mik.OX345649.1G824	Female	Male	-3.22799	7.81462	0.000955249	0.026842	#N/A
Petfic_v00_mik.OX345642.1G961.1	Petfic_v00_mik.OX345642.1G961	Female	Male	-3.22528	8.65809	0.00094514	0.0266143	#N/A
Petfic_v00_mik.OX345646.1G214.1	Petfic_v00_mik.OX345646.1G214	Female	Male	-3.22019	5.31655	0.00197833	0.0467371	#N/A
Petfic_v00_mik.OX345639.1G536.1	Petfic_v00_mik.OX345639.1G536	Female	Male	-3.21751	4.86082	0.00152449	0.0383975	#N/A
MSTRG.21859.2	Petfic_v00_mik.OX345653.1G445	Female	Male	-3.21656	5.79212	0.00185404	0.0443933	#N/A
Petfic_v00_mik.OX345645.1G199.1	Petfic_v00_mik.OX345645.1G199	Female	Male	-3.19956	7.72347	0.000494836	0.0157553	#N/A
Petfic_v00_mik.OX345639.1G110.1	Petfic_v00_mik.OX345639.1G110	Female	Male	-3.1987	5.93968	0.000367655	0.0123422	#N/A
Petfic_v00_mik.OX345641.1G76.1	Petfic_v00_mik.OX345641.1G76	Female	Male	-3.17608	7.17486	0.00179364	0.0431429	#N/A
Petfic_v00_mik.OX345652.1G97.1	Petfic_v00_mik.OX345652.1G97	Female	Male	-3.17104	6.89988	0.000643926	0.0195171	#N/A
Petfic_v00_mik.OX345639.1G1023.1	Petfic_v00_mik.OX345639.1G1023	Female	Male	-3.17054	4.92049	0.0007791	0.0229359	#N/A
MSTRG.13126.2	Petfic_v00_mik.OX345642.1G633	Female	Male	-3.1673	6.91171	0.00169171	0.0412505	#N/A
Petfic_v00_mik.OX345653.1G86.3	Petfic_v00_mik.OX345653.1G86	Female	Male	-3.16711	7.32858	0.000972531	0.0272124	#N/A
Petfic_v00_mik.OX345639.1G886.1	Petfic_v00_mik.OX345639.1G886	Female	Male	-3.16377	7.91809	0.00138453	0.0356248	#N/A
Petfic_v00_mik.OX345646.1G122.1	Petfic_v00_mik.OX345646.1G122	Female	Male	-3.14827	3.74852	0.00191615	0.0455518	#N/A
Petfic_v00_mik.OX345650.1G725.1	Petfic_v00_mik.OX345650.1G725	Female	Male	-3.14422	5.8834	0.00128971	0.0338745	#N/A
MSTRG.11467.25	Petfic_v00_mik.OX345640.1G972	Female	Male	-3.14357	4.3761	0.000137707	0.0056343	#N/A
Petfic_v00_mik.OX345650.1G180.1	Petfic_v00_mik.OX345650.1G180	Female	Male	-3.13968	6.79414	0.00158303	0.0394827	#N/A
Petfic_v00_mik.OX345653.1G70.1	Petfic_v00_mik.OX345653.1G70	Female	Male	-3.11931	8.46744	0.0010766	0.0294417	#N/A
Petfic_v00_mik.OX345642.1G24.1	Petfic_v00_mik.OX345642.1G24	Female	Male	-3.11243	7.72601	0.000764206	0.0225977	#N/A
Petfic_v00_mik.OX345651.1G587.1	Petfic_v00_mik.OX345651.1G587	Female	Male	-3.10299	7.03497	0.0016481	0.0406348	#N/A
Petfic_v00_mik.OX345650.1G61.1	Petfic_v00_mik.OX345650.1G61	Female	Male	-3.08793	2.90684	0.000171735	0.00670625	#N/A
MSTRG.14749.2	Petfic_v00_mik.OX345644.1G385	Female	Male	-3.08282	7.95756	0.00108019	0.0295095	#N/A
Petfic_v00_mik.OX345636.1G2091.1	Petfic_v00_mik.OX345636.1G2091	Female	Male	-3.06057	7.23991	0.0020867	0.0486054	#N/A
Petfic_v00_mik.OX345640.1G613.1	Petfic_v00_mik.OX345640.1G613	Female	Male	-3.03926	6.87178	0.000818534	0.0238065	#N/A
MSTRG.9537.3	Petfic_v00_mik.OX345639.1G552	Female	Male	-3.03152	5.90751	9.79144e-05	0.00427861	#N/A
Petfic_v00_mik.OX345636.1G2234.1	Petfic_v00_mik.OX345636.1G2234	Female	Male	-3.02306	5.2465	0.00155296	0.038903	#N/A
MSTRG.16827.1	0	Female	Male	-3.02068	5.53434	0.00188438	0.0449173	#N/A
Petfic_v00_mik.OX345639.1G208.1	Petfic_v00_mik.OX345639.1G208	Female	Male	-3.01564	6.53538	0.00197431	0.0466836	#N/A
Petfic_v00_mik.OX345637.1G814.1	Petfic_v00_mik.OX345637.1G814	Female	Male	-3.00995	2.99472	0.00169804	0.0413289	#N/A
MSTRG.16335.1	Petfic_v00_mik.OX345646.1G113	Female	Male	-3.00936	7.59393	0.000223188	0.00825422	#N/A
Petfic_v00_mik.OX345637.1G491.1	Petfic_v00_mik.OX345637.1G491	Female	Male	-3.00888	6.31901	0.000528102	0.0165955	#N/A
Petfic_v00_mik.OX345638.1G200.1	Petfic_v00_mik.OX345638.1G200	Female	Male	-2.99817	6.59264	0.00201278	0.0474244	#N/A
Petfic_v00_mik.OX345639.1G1528.1	Petfic_v00_mik.OX345639.1G1528	Female	Male	-2.99083	6.76195	0.000610451	0.0186659	#N/A
Petfic_v00_mik.OX345648.1G16.1	Petfic_v00_mik.OX345648.1G16	Female	Male	-2.98255	8.7308	0.00110936	0.0300945	#N/A
Petfic_v00_mik.OX345639.1G1495.1	Petfic_v00_mik.OX345639.1G1495	Female	Male	-2.96626	6.74203	0.00178101	0.0429156	#N/A
MSTRG.18656.1	Petfic_v00_mik.OX345649.1G181	Female	Male	-2.9557	8.70137	0.00161423	0.0399853	#N/A
Petfic_v00_mik.OX345639.1G870.1	Petfic_v00_mik.OX345639.1G869	Female	Male	-2.95147	5.25183	0.00116957	0.0314406	#N/A
MSTRG.10909.2	Petfic_v00_mik.OX345640.1G450	Female	Male	-2.92329	4.22123	0.000348264	0.0119173	#N/A
Petfic_v00_mik.OX345641.1G49.1	Petfic_v00_mik.OX345641.1G49	Female	Male	-2.92051	8.27523	0.00177532	0.0428172	#N/A
MSTRG.15552.5	Petfic_v00_mik.OX345645.1G211	Female	Male	-2.90376	2.87232	0.00186709	0.0446253	#N/A
Petfic_v00_mik.OX345648.1G43.1	Petfic_v00_mik.OX345648.1G43	Female	Male	-2.87327	6.1692	0.000559944	0.0174215	#N/A
MSTRG.3520.2	Petfic_v00_mik.OX345636.1G4187.1	Female	Male	-2.86024	5.22683	0.001323	0.0345777	#N/A
Petfic_v00_mik.OX345649.1G142.1	Petfic_v00_mik.OX345649.1G142	Female	Male	-2.85366	7.92912	0.000793163	0.0232725	#N/A
Petfic_v00_mik.OX345637.1G851.1	Petfic_v00_mik.OX345637.1G843	Female	Male	-2.83704	4.40481	0.000119719	0.00505408	#N/A
Petfic_v00_mik.OX345643.1G846.1	Petfic_v00_mik.OX345643.1G846	Female	Male	-2.83138	5.02153	0.00164629	0.0406278	#N/A
Petfic_v00_mik.OX345643.1G17.1	Petfic_v00_mik.OX345643.1G17	Female	Male	-2.83134	8.81012	0.00145058	0.0370372	#N/A
Petfic_v00_mik.OX345636.1G4786.2	Petfic_v00_mik.OX345636.1G4786	Female	Male	-2.82355	8.47839	0.000897344	0.0255118	#N/A
Petfic_v00_mik.OX345636.1G1315.1	Petfic_v00_mik.OX345636.1G1315	Female	Male	-2.81846	5.57671	0.00202317	0.0474692	#N/A
Petfic_v00_mik.OX345646.1G653.1	Petfic_v00_mik.OX345646.1G653	Female	Male	-2.80718	5.45464	0.000800466	0.0234396	#N/A
Petfic_v00_mik.OX345642.1G709.1	Petfic_v00_mik.OX345642.1G709	Female	Male	-2.77078	5.48844	0.00168057	0.0411708	#N/A
Petfic_v00_mik.OX345653.1G400.1	Petfic_v00_mik.OX345653.1G400	Female	Male	-2.76579	11.0021	0.00179369	0.0431429	#N/A
Petfic_v00_mik.OX345640.1G436.1	Petfic_v00_mik.OX345640.1G436	Female	Male	-2.7557	6.01715	0.00201816	0.0474604	#N/A
MSTRG.5089.2	Petfic_v00_mik.OX345636.1G6066	Female	Male	-2.73213	5.6637	0.000610857	0.0186659	#N/A
Petfic_v00_mik.OX345649.1G735.2	Petfic_v00_mik.OX345649.1G735	Female	Male	-2.71525	6.6555	0.000763677	0.0225977	#N/A
Petfic_v00_mik.OX345649.1G181.1	Petfic_v00_mik.OX345649.1G181	Female	Male	-2.70155	4.77136	0.00102985	0.0285456	#N/A
Petfic_v00_mik.OX345647.1G355.1	Petfic_v00_mik.OX345647.1G355	Female	Male	-2.67467	6.41068	0.00168917	0.041239	#N/A
MSTRG.20692.2	Petfic_v00_mik.OX345651.1G615	Female	Male	-2.63426	5.43466	0.000782404	0.0229823	#N/A
Petfic_v00_mik.OX345640.1G8.1	Petfic_v00_mik.OX345640.1G8	Female	Male	-2.59669	9.18331	0.002017	0.0474604	#N/A
Petfic_v00_mik.OX345644.1G385.1	Petfic_v00_mik.OX345644.1G385	Female	Male	-2.55998	4.80145	0.0013668	0.0354297	#N/A
MSTRG.9856.1	Petfic_v00_mik.OX345639.1G863	Female	Male	-2.55446	3.43696	0.000276167	0.00985663	#N/A
Petfic_v00_mik.OX345642.1G7.1	Petfic_v00_mik.OX345642.1G7	Female	Male	-2.44463	5.33124	0.00152109	0.0383582	#N/A
Petfic_v00_mik.OX345639.1G273.1	Petfic_v00_mik.OX345639.1G273	Female	Male	-2.41458	6.63818	0.00191061	0.0455016	#N/A
MSTRG.21401.2	Petfic_v00_mik.OX345652.1G674	Female	Male	-2.30228	5.79538	0.00144155	0.0368421	#N/A
Petfic_v00_mik.OX345645.1G211.1	Petfic_v00_mik.OX345645.1G211	Female	Male	-2.26808	7.68083	0.00130718	0.0342655	#N/A
MSTRG.11949.1	Petfic_v00_mik.OX345641.1G501	Female	Male	-2.25333	8.16173	0.00108354	0.0295708	#N/A
Petfic_v00_mik.OX345651.1G348.1	Petfic_v00_mik.OX345651.1G348	Female	Male	-1.82327	5.14398	0.000880658	0.0251722	#N/A
MSTRG.21576.1	Petfic_v00_mik.OX345653.1G151	Female	Male	1.90955	6.98347	6.00062e-05	0.00294529	#N/A
MSTRG.17993.4	Petfic_v00_mik.OX345648.1G346	Female	Male	1.96166	6.16526	0.00204453	0.0478751	#N/A
Petfic_v00_mik.OX345650.1G746.2	Petfic_v00_mik.OX345650.1G746	Female	Male	2.00417	5.36605	0.000210733	0.00789254	#N/A
MSTRG.18788.4	Petfic_v00_mik.OX345649.1G296	Female	Male	2.23064	4.72832	0.00168742	0.041239	#N/A
Petfic_v00_mik.OX345644.1G565.1	Petfic_v00_mik.OX345644.1G545	Female	Male	2.26704	3.79799	0.000529681	0.0166058	#N/A
Petfic_v00_mik.OX345643.1G581.1	Petfic_v00_mik.OX345643.1G581	Female	Male	2.38933	5.33344	0.00027956	0.00992437	#N/A
Petfic_v00_mik.OX345645.1G190.1	Petfic_v00_mik.OX345645.1G190	Female	Male	2.40921	5.3892	0.00021996	0.00814619	#N/A
Petfic_v00_mik.OX345640.1G268.1	Petfic_v00_mik.OX345640.1G268	Female	Male	2.45164	5.33844	0.000125501	0.00524813	#N/A
Petfic_v00_mik.OX345644.1G389.2	Petfic_v00_mik.OX345644.1G389	Female	Male	2.50083	4.70781	0.000247094	0.00897583	#N/A
MSTRG.3722.7	Petfic_v00_mik.OX345636.1G4502	Female	Male	2.51981	5.49039	0.00040423	0.0132681	#N/A
Petfic_v00_mik.OX345649.1G553.1	Petfic_v00_mik.OX345649.1G553	Female	Male	2.57964	7.17804	2.30001e-05	0.00141704	#N/A
Petfic_v00_mik.OX345639.1G323.2	Petfic_v00_mik.OX345639.1G323	Female	Male	2.59265	4.10213	0.000342443	0.0117483	#N/A
Petfic_v00_mik.OX345636.1G684.1	Petfic_v00_mik.OX345636.1G684	Female	Male	2.61062	4.31432	0.00041468	0.0135776	#N/A
Petfic_v00_mik.OX345650.1G122.1	Petfic_v00_mik.OX345650.1G122	Female	Male	2.62024	2.16884	0.0016436	0.0406278	#N/A
MSTRG.7565.6	Petfic_v00_mik.OX345637.1G1707	Female	Male	2.6363	1.93533	0.00194008	0.0459973	#N/A
MSTRG.877.1	0	Female	Male	2.67043	3.12637	0.000839331	0.024252	#N/A
Petfic_v00_mik.OX345644.1G583.1	Petfic_v00_mik.OX345644.1G583	Female	Male	2.70879	3.26197	0.000204401	0.00767702	#N/A
Petfic_v00_mik.OX345638.1G873.1	Petfic_v00_mik.OX345638.1G862	Female	Male	2.79272	5.27118	0.000268775	0.00961869	#N/A
Petfic_v00_mik.OX345652.1G385.1	Petfic_v00_mik.OX345652.1G385	Female	Male	2.81194	4.77649	7.25203e-06	0.000569735	#N/A
Petfic_v00_mik.OX345636.1G4200.1	Petfic_v00_mik.OX345636.1G4200	Female	Male	2.8254	4.47371	0.000133555	0.00551957	#N/A
MSTRG.7911.5	Petfic_v00_mik.OX345638.1G139	Female	Male	3.03747	2.20334	0.0016534	0.040713	#N/A
MSTRG.812.1	0	Female	Male	3.08851	1.27742	0.00154997	0.0389016	#N/A
Petfic_v00_mik.OX345645.1G106.1	Petfic_v00_mik.OX345645.1G106	Female	Male	3.213	0.866117	0.00165535	0.040713	#N/A
MSTRG.4315.1	Petfic_v00_mik.OX345636.1G5045	Female	Male	3.36262	4.63522	0.000579671	0.0179192	#N/A
MSTRG.11600.1	0	Female	Male	3.42412	-0.429527	0.000892993	0.0254154	#N/A
Petfic_v00_mik.OX345638.1G876.1	Petfic_v00_mik.OX345638.1G862	Female	Male	3.42699	4.12629	0.000892206	0.0254154	#N/A
MSTRG.17069.11	Petfic_v00_mik.OX345647.1G107	Female	Male	3.43768	1.57687	0.000909458	0.025801	#N/A
MSTRG.13448.1	Petfic_v00_mik.OX345642.1G951	Female	Male	3.46918	3.96482	0.000277748	0.00987324	#N/A
Petfic_v00_mik.OX345642.1G949.1	Petfic_v00_mik.OX345642.1G949	Female	Male	3.48906	4.2674	0.000150308	0.00604738	#N/A
Petfic_v00_mik.OX345638.1G984.1	Petfic_v00_mik.OX345638.1G971	Female	Male	3.53102	1.51423	0.00205187	0.0479625	#N/A
MSTRG.4386.4	Petfic_v00_mik.OX345636.1G5154	Female	Male	3.61476	1.76504	0.000191192	0.00731542	#N/A
MSTRG.336.2	Petfic_v00_mik.OX345636.1G427	Female	Male	3.62192	4.68972	1.78461e-05	0.00117008	#N/A
MSTRG.5153.2	Petfic_v00_mik.OX345636.1G6152	Female	Male	3.67784	4.45387	1.02639e-05	0.000759183	#N/A
MSTRG.13933.5	Petfic_v00_mik.OX345643.1G430	Female	Male	3.7179	1.24197	0.00086995	0.0249467	#N/A
Petfic_v00_mik.OX345643.1G527.1	Petfic_v00_mik.OX345643.1G527	Female	Male	3.72104	3.33598	0.00112458	0.0304096	#N/A
Petfic_v00_mik.OX345636.1G6161.1	Petfic_v00_mik.OX345636.1G6161	Female	Male	3.73484	6.10874	1.76566e-07	3.29463e-05	#N/A
MSTRG.7458.2	Petfic_v00_mik.OX345637.1G1549	Female	Male	3.75011	1.45414	0.00122181	0.0326398	#N/A
MSTRG.5891.2	0	Female	Male	3.88441	0.907252	0.00204882	0.0479333	#N/A
MSTRG.20493.1	0	Female	Male	3.89504	-0.32944	0.00100752	0.0280438	#N/A
MSTRG.3828.1	Petfic_v00_mik.OX345636.1G4603.1	Female	Male	3.93508	-0.0249689	0.00158662	0.0395227	#N/A
MSTRG.4275.7	Petfic_v00_mik.OX345636.1G5034.1	Female	Male	3.9394	1.81552	0.0017153	0.0415965	#N/A
MSTRG.170.4	0	Female	Male	3.97663	-0.621433	0.00191444	0.0455518	#N/A
MSTRG.12646.3	Petfic_v00_mik.OX345642.1G159	Female	Male	3.97698	4.34052	4.28825e-07	6.43335e-05	#N/A
Petfic_v00_mik.OX345642.1G618.1	Petfic_v00_mik.OX345642.1G618	Female	Male	3.99438	4.41985	0.00085286	0.0245096	#N/A
MSTRG.11227.1	0	Female	Male	4.01678	0.642973	0.0015472	0.0389016	#N/A
MSTRG.12967.1	Petfic_v00_mik.OX345642.1G491	Female	Male	4.05265	4.96619	3.14978e-06	0.000299782	#N/A
MSTRG.6164.2	Petfic_v00_mik.OX345637.1G201	Female	Male	4.1071	3.70322	0.00206741	0.0482407	#N/A
MSTRG.11925.2	Petfic_v00_mik.OX345641.1G481	Female	Male	4.19852	0.666824	0.000516276	0.0163011	#N/A
Petfic_v00_mik.OX345640.1G915.1	Petfic_v00_mik.OX345640.1G915	Female	Male	4.31777	2.81531	8.43404e-05	0.00384147	#N/A
Petfic_v00_mik.OX345641.1G878.1	Petfic_v00_mik.OX345641.1G878	Female	Male	4.4009	0.184553	0.00113369	0.0306247	#N/A
Petfic_v00_mik.OX345644.1G641.1	Petfic_v00_mik.OX345644.1G639	Female	Male	4.55904	0.814746	5.18725e-05	0.00267461	#N/A
MSTRG.17934.3	Petfic_v00_mik.OX345648.1G284	Female	Male	4.60998	-1.06732	0.000765605	0.0226139	#N/A
MSTRG.7080.29	Petfic_v00_mik.OX345637.1G1217	Female	Male	4.74611	1.1588	0.00161039	0.039958	#N/A
MSTRG.14902.1	0	Female	Male	4.76273	2.65953	0.000356365	0.0121189	#N/A
MSTRG.8584.1	0	Female	Male	4.76825	-1.01896	0.00152555	0.0383975	#N/A
MSTRG.2071.2	0	Female	Male	4.89668	2.12536	0.000356439	0.0121189	#N/A
MSTRG.9786.1	Petfic_v00_mik.OX345639.1G800	Female	Male	4.93541	3.57077	1.775e-06	0.000196389	#N/A
Petfic_v00_mik.OX345645.1G135.1	Petfic_v00_mik.OX345645.1G135	Female	Male	4.98826	0.514316	0.000108395	0.00464247	#N/A
Petfic_v00_mik.OX345637.1G1560.2	Petfic_v00_mik.OX345637.1G1560	Female	Male	5.03889	2.75895	0.00101656	0.0282362	#N/A
MSTRG.8662.26	Petfic_v00_mik.OX345638.1G971	Female	Male	5.04123	1.3293	0.0012165	0.0325307	#N/A
MSTRG.17955.1	0	Female	Male	5.06052	4.28174	1.15913e-06	0.000141542	#N/A
MSTRG.13435.1	0	Female	Male	5.19857	0.257628	0.00106449	0.0292009	#N/A
MSTRG.5892.14	Petfic_v00_mik.OX345636.1G7046	Female	Male	5.25765	0.361602	6.05749e-06	0.000498162	#N/A
MSTRG.15980.2	Petfic_v00_mik.OX345645.1G782	Female	Male	5.27739	0.391896	0.000688962	0.0207077	#N/A
Petfic_v00_mik.OX345638.1G1093.1	Petfic_v00_mik.OX345638.1G1093	Female	Male	5.33006	0.441384	0.00168225	0.0411708	#N/A
MSTRG.1756.11	Petfic_v00_mik.OX345636.1G1984	Female	Male	5.35027	2.46155	0.00144061	0.0368421	#N/A
MSTRG.4484.11	Petfic_v00_mik.OX345636.1G5207	Female	Male	5.35641	0.343552	0.000529566	0.0166058	#N/A
MSTRG.15454.2	Petfic_v00_mik.OX345645.1G120	Female	Male	5.37986	-1.13919	0.000295081	0.0103236	#N/A
MSTRG.8371.3	Petfic_v00_mik.OX345638.1G635	Female	Male	5.43996	3.27912	0.000944025	0.0266111	#N/A
MSTRG.13955.2	Petfic_v00_mik.OX345643.1G456	Female	Male	5.49785	2.66182	4.97262e-06	0.000428711	#N/A
MSTRG.13448.3	Petfic_v00_mik.OX345642.1G951	Female	Male	5.51928	0.26078	0.00139218	0.0357871	#N/A
Petfic_v00_mik.OX345638.1G936.1	Petfic_v00_mik.OX345638.1G887	Female	Male	5.55099	1.13681	0.000816168	0.023785	#N/A
Petfic_v00_mik.OX345637.1G1658.1	Petfic_v00_mik.OX345637.1G1651	Female	Male	5.55737	2.35987	8.46796e-05	0.00385031	#N/A
MSTRG.12013.1	0	Female	Male	5.56155	1.34297	1.56686e-05	0.00105176	#N/A
MSTRG.5892.18	Petfic_v00_mik.OX345636.1G7046	Female	Male	5.6484	1.26178	1.22983e-05	0.000867987	#N/A
MSTRG.20810.1	0	Female	Male	5.65747	2.08666	3.27651e-08	8.96954e-06	#N/A
MSTRG.15369.5	Petfic_v00_mik.OX345645.1G11	Female	Male	5.67043	5.22685	0.00034672	0.0118798	#N/A
MSTRG.17223.2	Petfic_v00_mik.OX345647.1G254	Female	Male	5.72616	2.49979	0.000587846	0.0180667	#N/A
MSTRG.9338.3	Petfic_v00_mik.OX345639.1G363	Female	Male	5.76225	2.00032	0.000110238	0.00469867	#N/A
MSTRG.17069.9	Petfic_v00_mik.OX345647.1G107	Female	Male	5.78746	-0.142131	0.000228396	0.0084117	#N/A
Petfic_v00_mik.OX345640.1G815.1	Petfic_v00_mik.OX345640.1G815	Female	Male	5.79862	2.19016	0.000196863	0.00748344	#N/A
MSTRG.3368.3	Petfic_v00_mik.OX345636.1G3956	Female	Male	5.90864	0.983192	0.000537979	0.0168262	#N/A
MSTRG.13905.1	0	Female	Male	5.96687	2.70614	9.41844e-05	0.00418923	#N/A
Petfic_v00_mik.OX345641.1G876.1	Petfic_v00_mik.OX345641.1G875	Female	Male	6.00752	3.77255	9.74851e-07	0.000126274	#N/A
MSTRG.7559.1	Petfic_v00_mik.OX345637.1G1703	Female	Male	6.04469	2.32392	0.000223856	0.00825593	#N/A
Petfic_v00_mik.OX345636.1G4217.1	Petfic_v00_mik.OX345636.1G4217	Female	Male	6.06258	1.50503	0.00103988	0.0286739	#N/A
Petfic_v00_mik.OX345639.1G650.1	Petfic_v00_mik.OX345639.1G649	Female	Male	6.15161	2.97958	0.00208643	0.0486054	#N/A
MSTRG.21948.4	Petfic_v00_mik.OX345653.1G524	Female	Male	6.18447	2.98325	0.0012345	0.0328139	#N/A
MSTRG.17956.1	0	Female	Male	6.20424	3.41257	4.93641e-09	1.79564e-06	#N/A
Petfic_v00_mik.OX345641.1G875.1	Petfic_v00_mik.OX345641.1G875	Female	Male	6.20584	4.5257	3.38632e-05	0.00190801	#N/A
MSTRG.18291.2	Petfic_v00_mik.OX345648.1G646	Female	Male	6.20878	1.02118	2.78548e-05	0.00165842	#N/A
MSTRG.11748.4	Petfic_v00_mik.OX345641.1G267	Female	Male	6.22062	1.56479	0.000815973	0.023785	#N/A
MSTRG.7538.6	Petfic_v00_mik.OX345637.1G1696	Female	Male	6.22561	0.350546	2.42351e-05	0.00148281	#N/A
Petfic_v00_mik.OX345636.1G342.1	Petfic_v00_mik.OX345636.1G342	Female	Male	6.26494	3.89531	1.13359e-06	0.000139405	#N/A
MSTRG.880.1	0	Female	Male	6.32257	-0.330482	3.10682e-05	0.00179345	#N/A
Petfic_v00_mik.OX345641.1G869.1	Petfic_v00_mik.OX345641.1G869	Female	Male	6.33052	5.74818	1.33932e-10	7.58611e-08	#N/A
Petfic_v00_mik.OX345645.1G466.1	Petfic_v00_mik.OX345645.1G462	Female	Male	6.45353	6.07897	4.94054e-05	0.00256734	#N/A
Petfic_v00_mik.OX345640.1G648.1	Petfic_v00_mik.OX345640.1G648	Female	Male	6.46299	5.63218	2.37597e-07	4.07043e-05	#N/A
Petfic_v00_mik.OX345647.1G311.1	Petfic_v00_mik.OX345647.1G311	Female	Male	6.49749	1.54642	8.97376e-05	0.00403197	#N/A
Petfic_v00_mik.OX345637.1G1656.1	Petfic_v00_mik.OX345637.1G1651	Female	Male	6.56297	2.17451	0.00191958	0.0455927	#N/A
MSTRG.14641.1	Petfic_v00_mik.OX345644.1G244	Female	Male	6.67919	0.0867949	1.44578e-05	0.000989463	#N/A
MSTRG.2071.1	0	Female	Male	6.70385	2.1157	0.000235001	0.0086072	#N/A
MSTRG.15787.20	Petfic_v00_mik.OX345645.1G462	Female	Male	6.74332	2.32795	0.000249053	0.00903462	#N/A
MSTRG.21914.1	0	Female	Male	6.75797	4.02644	2.55637e-09	1.04433e-06	#N/A
MSTRG.12335.2	Petfic_v00_mik.OX345641.1G875	Female	Male	6.75822	2.64641	3.99127e-05	0.00216736	#N/A
Petfic_v00_mik.OX345640.1G125.1	Petfic_v00_mik.OX345640.1G125	Female	Male	6.82106	2.59583	0.000162669	0.00642783	#N/A
MSTRG.1755.2	Petfic_v00_mik.OX345636.1G1981	Female	Male	6.88446	2.01276	0.000301816	0.0105176	#N/A
Petfic_v00_mik.OX345636.1G622.1	Petfic_v00_mik.OX345636.1G622	Female	Male	6.97056	2.91303	0.00148886	0.037852	#N/A
Petfic_v00_mik.OX345645.1G723.1	Petfic_v00_mik.OX345645.1G723	Female	Male	7.01895	0.583586	9.45608e-05	0.00419894	#N/A
Petfic_v00_mik.OX345653.1G112.1	Petfic_v00_mik.OX345653.1G112	Female	Male	7.03353	3.8243	1.2482e-08	3.89939e-06	#N/A
Petfic_v00_mik.OX345636.1G4206.3	Petfic_v00_mik.OX345636.1G4206	Female	Male	7.03929	4.68442	0.00168219	0.0411708	#N/A
MSTRG.8605.1	Petfic_v00_mik.OX345638.1G879	Female	Male	7.0677	1.72995	9.81352e-05	0.00427895	#N/A
MSTRG.9225.3	Petfic_v00_mik.OX345639.1G247	Female	Male	7.16084	2.55078	8.43584e-08	1.95835e-05	#N/A
MSTRG.7410.2	Petfic_v00_mik.OX345637.1G1534	Female	Male	7.17678	0.799339	0.00101051	0.0280974	#N/A
MSTRG.11424.2	Petfic_v00_mik.OX345640.1G966	Female	Male	7.20548	3.53586	2.33568e-09	9.8419e-07	#N/A
MSTRG.14719.18	Petfic_v00_mik.OX345644.1G341	Female	Male	7.34865	-1.11128	0.000126866	0.00528027	#N/A
MSTRG.5559.1	Petfic_v00_mik.OX345636.1G6633	Female	Male	7.45373	-1.02266	0.000196992	0.00748344	#N/A
MSTRG.15887.1	0	Female	Male	7.46256	0.670137	0.00137062	0.0354732	#N/A
MSTRG.11187.8	Petfic_v00_mik.OX345640.1G718	Female	Male	7.46428	-1.01399	0.0001502	0.00604738	#N/A
Petfic_v00_mik.OX345636.1G5999.1	Petfic_v00_mik.OX345636.1G5999	Female	Male	7.46913	-1.01039	5.01784e-05	0.00259734	#N/A
MSTRG.18179.3	Petfic_v00_mik.OX345648.1G547	Female	Male	7.47051	-1.00888	0.000340647	0.0117019	#N/A
MSTRG.18339.1	Petfic_v00_mik.OX345648.1G698	Female	Male	7.53686	-0.953069	2.25818e-05	0.0013945	#N/A
MSTRG.8350.7	Petfic_v00_mik.OX345638.1G609	Female	Male	7.53827	2.08857	0.0014814	0.0377563	#N/A
Petfic_v00_mik.OX345640.1G526.1	0	Female	Male	7.57099	-0.923794	3.59267e-05	0.00199164	#N/A
MSTRG.16889.1	Petfic_v00_mik.OX345646.1G691	Female	Male	7.58369	-0.913113	1.82156e-05	0.00118314	#N/A
Petfic_v00_mik.OX345646.1G177.2	Petfic_v00_mik.OX345646.1G173	Female	Male	7.58948	-0.906836	0.000644794	0.0195171	#N/A
MSTRG.21112.2	Petfic_v00_mik.OX345652.1G387	Female	Male	7.61686	-0.887636	0.0013739	0.0354888	#N/A
MSTRG.6267.6	0	Female	Male	7.62428	-0.879427	0.000211985	0.00792823	#N/A
MSTRG.10805.1	Petfic_v00_mik.OX345640.1G342	Female	Male	7.62824	2.03268	1.32799e-05	0.000927985	#N/A
Petfic_v00_mik.OX345652.1G141.1	Petfic_v00_mik.OX345652.1G141	Female	Male	7.66506	-0.843349	1.98016e-05	0.00125492	#N/A
Petfic_v00_mik.OX345639.1G5.1	Petfic_v00_mik.OX345639.1G5	Female	Male	7.69882	-0.813064	8.2674e-05	0.00380945	#N/A
MSTRG.3628.1	Petfic_v00_mik.OX345636.1G4300.1	Female	Male	7.71001	-0.80483	3.67261e-05	0.00201493	#N/A
MSTRG.17223.13	Petfic_v00_mik.OX345647.1G254	Female	Male	7.71482	-0.80082	5.7241e-05	0.00286788	#N/A
MSTRG.7022.1	0	Female	Male	7.73327	3.2553	1.51515e-06	0.000173254	#N/A
MSTRG.11395.7	Petfic_v00_mik.OX345640.1G930	Female	Male	7.73681	-0.780803	0.00012239	0.00514232	#N/A
Petfic_v00_mik.OX345651.1G405.1	Petfic_v00_mik.OX345651.1G405	Female	Male	7.75124	-0.767709	8.21004e-05	0.00379147	#N/A
MSTRG.13406.6	Petfic_v00_mik.OX345642.1G905	Female	Male	7.76943	-0.752889	1.94435e-05	0.00123813	#N/A
Petfic_v00_mik.OX345639.1G1060.2	Petfic_v00_mik.OX345639.1G1060	Female	Male	7.77551	-0.7456	0.000199591	0.00756053	#N/A
Petfic_v00_mik.OX345645.1G578.1	Petfic_v00_mik.OX345645.1G578	Female	Male	7.77576	4.59256	0.000830613	0.0240787	#N/A
Petfic_v00_mik.OX345643.1G613.1	Petfic_v00_mik.OX345643.1G613	Female	Male	7.79062	5.96503	8.98563e-13	9.94185e-10	#N/A
Petfic_v00_mik.OX345653.1G523.1	Petfic_v00_mik.OX345653.1G523	Female	Male	7.79622	3.72513	0.00050943	0.0161041	#N/A
MSTRG.2898.1	0	Female	Male	7.80817	-0.719531	3.50743e-05	0.00195254	#N/A
Petfic_v00_mik.OX345648.1G221.1	Petfic_v00_mik.OX345648.1G220	Female	Male	7.81185	-0.715894	2.57527e-05	0.00156844	#N/A
MSTRG.5185.3	Petfic_v00_mik.OX345636.1G6164	Female	Male	7.81615	1.0031	0.00104662	0.0287999	#N/A
MSTRG.8361.1	0	Female	Male	7.82641	-0.703269	1.19471e-05	0.0008551	#N/A
MSTRG.8591.3	Petfic_v00_mik.OX345638.1G866	Female	Male	7.82907	4.37999	0.000124857	0.00522942	#N/A
MSTRG.8334.2	0	Female	Male	7.86601	-0.667132	0.000719834	0.021523	#N/A
Petfic_v00_mik.OX345640.1G957.1	Petfic_v00_mik.OX345640.1G957	Female	Male	7.90466	-0.634726	1.04698e-05	0.000770125	#N/A
Petfic_v00_mik.OX345643.1G604.2	Petfic_v00_mik.OX345643.1G604	Female	Male	7.9147	-0.625399	1.70883e-05	0.0011344	#N/A
MSTRG.17130.2	Petfic_v00_mik.OX345647.1G172	Female	Male	7.94773	-0.595575	0.000161997	0.00641085	#N/A
MSTRG.18629.9	Petfic_v00_mik.OX345649.1G154	Female	Male	7.95472	-0.589346	0.000317358	0.0110303	#N/A
MSTRG.17366.1	Petfic_v00_mik.OX345647.1G416	Female	Male	7.9963	-0.553643	4.8509e-06	0.00042095	#N/A
MSTRG.15900.1	0	Female	Male	8.05517	4.29743	6.93962e-10	3.35045e-07	#N/A
MSTRG.840.1	0	Female	Male	8.05792	-0.49894	2.842e-05	0.00167892	#N/A
MSTRG.15074.26	Petfic_v00_mik.OX345644.1G545	Female	Male	8.07662	-0.484107	0.000355383	0.012114	#N/A
MSTRG.8673.1	0	Female	Male	8.10216	-0.458069	0.000754761	0.0223682	#N/A
MSTRG.3691.9	Petfic_v00_mik.OX345636.1G4385	Female	Male	8.11185	-0.448308	0.000489576	0.0156065	#N/A
MSTRG.4315.11	Petfic_v00_mik.OX345636.1G5045	Female	Male	8.11433	-0.4484	6.70391e-06	0.000539191	#N/A
Petfic_v00_mik.OX345649.1G255.2	Petfic_v00_mik.OX345649.1G255	Female	Male	8.1499	-0.41656	2.09697e-05	0.00131327	#N/A
MSTRG.21948.3	Petfic_v00_mik.OX345653.1G524	Female	Male	8.21114	2.61693	1.08201e-06	0.000135527	#N/A
MSTRG.19452.4	Petfic_v00_mik.OX345650.1G155	Female	Male	8.21272	-0.359448	2.71153e-05	0.00162901	#N/A
MSTRG.7738.16	Petfic_v00_mik.OX345637.1G1850	Female	Male	8.23089	-0.344574	6.78792e-05	0.00325943	#N/A
MSTRG.18604.10	Petfic_v00_mik.OX345649.1G115	Female	Male	8.2371	-0.336419	0.000918071	0.0259898	#N/A
MSTRG.5185.2	Petfic_v00_mik.OX345636.1G6164	Female	Male	8.24712	1.41462	0.000846961	0.0243902	#N/A
MSTRG.15787.22	Petfic_v00_mik.OX345645.1G462	Female	Male	8.25485	-0.323638	6.88102e-05	0.00328041	#N/A
Petfic_v00_mik.OX345645.1G575.1	Petfic_v00_mik.OX345645.1G575	Female	Male	8.26941	5.78858	4.57542e-18	1.73565e-14	#N/A
MSTRG.15888.1	0	Female	Male	8.31124	3.74175	1.14817e-10	6.92922e-08	#N/A
MSTRG.15787.14	Petfic_v00_mik.OX345645.1G462	Female	Male	8.33279	5.4106	2.71664e-09	1.09299e-06	#N/A
Petfic_v00_mik.OX345640.1G970.1	Petfic_v00_mik.OX345640.1G966	Female	Male	8.36779	-0.218851	3.18456e-05	0.00181466	#N/A
MSTRG.2534.1	0	Female	Male	8.37214	-0.215919	2.14041e-06	0.00022644	#N/A
MSTRG.10675.3	Petfic_v00_mik.OX345640.1G204	Female	Male	8.38028	-0.207493	0.000138799	0.00567025	#N/A
MSTRG.6051.1	Petfic_v00_mik.OX345637.1G95	Female	Male	8.42459	-0.169151	6.67832e-05	0.00321898	#N/A
MSTRG.3152.4	Petfic_v00_mik.OX345636.1G3502	Female	Male	8.43424	-0.158901	6.92182e-06	0.000548023	#N/A
MSTRG.4334.1	0	Female	Male	8.4415	-0.152889	3.41763e-06	0.000317314	#N/A
Petfic_v00_mik.OX345636.1G5910.1	Petfic_v00_mik.OX345636.1G5910	Female	Male	8.44617	-0.149743	0.000166745	0.0065323	#N/A
Petfic_v00_mik.OX345641.1G588.1	Petfic_v00_mik.OX345641.1G588	Female	Male	8.49144	9.15119	0.000963362	0.0270128	#N/A
Petfic_v00_mik.OX345652.1G511.2	Petfic_v00_mik.OX345652.1G511	Female	Male	8.53391	-0.0679495	1.8871e-06	0.0002037	#N/A
MSTRG.20783.4	Petfic_v00_mik.OX345652.1G37	Female	Male	8.58118	-0.0253532	1.5685e-05	0.00105176	#N/A
MSTRG.17319.3	Petfic_v00_mik.OX345647.1G372	Female	Male	8.60934	0.000730163	1.15776e-05	0.000835409	#N/A
Petfic_v00_mik.OX345636.1G5166.1	Petfic_v00_mik.OX345636.1G5164	Female	Male	8.62434	0.0150389	1.04489e-06	0.00013184	#N/A
MSTRG.964.2	Petfic_v00_mik.OX345636.1G1043	Female	Male	8.70605	0.0922063	3.90203e-05	0.00212869	#N/A
Petfic_v00_mik.OX345636.1G6032.1	Petfic_v00_mik.OX345636.1G6032	Female	Male	8.71585	0.0999473	1.16886e-06	0.000141726	#N/A
MSTRG.14124.2	0	Female	Male	8.72638	0.110493	0.000847688	0.0243902	#N/A
MSTRG.19049.2	Petfic_v00_mik.OX345649.1G557	Female	Male	8.75224	0.133741	4.05718e-06	0.000367694	#N/A
MSTRG.12509.10	Petfic_v00_mik.OX345642.1G17	Female	Male	8.80438	2.92563	4.2939e-06	0.000382618	#N/A
Petfic_v00_mik.OX345650.1G137.2	Petfic_v00_mik.OX345650.1G137	Female	Male	8.81257	0.189554	3.62748e-07	5.66612e-05	#N/A
MSTRG.10971.3	Petfic_v00_mik.OX345640.1G497	Female	Male	8.84795	0.22225	3.41406e-05	0.00191664	#N/A
Petfic_v00_mik.OX345641.1G877.1	Petfic_v00_mik.OX345641.1G877	Female	Male	8.85205	4.53485	1.48155e-10	8.19605e-08	#N/A
MSTRG.19443.3	Petfic_v00_mik.OX345650.1G137	Female	Male	8.92531	0.294832	2.10272e-07	3.69773e-05	#N/A
Petfic_v00_mik.OX345637.1G1549.1	Petfic_v00_mik.OX345637.1G1549	Female	Male	8.93182	0.301377	1.71913e-06	0.000191521	#N/A
MSTRG.1591.5	Petfic_v00_mik.OX345636.1G1748	Female	Male	8.9617	0.330394	0.00132019	0.034569	#N/A
MSTRG.7460.1	0	Female	Male	8.96237	0.330422	6.05958e-06	0.000498162	#N/A
MSTRG.5027.3	Petfic_v00_mik.OX345636.1G5999	Female	Male	8.99684	0.362462	1.8336e-06	0.000199547	#N/A
MSTRG.6948.15	Petfic_v00_mik.OX345637.1G1063	Female	Male	9.01126	0.376219	0.000476474	0.0153361	#N/A
Petfic_v00_mik.OX345636.1G200.1	Petfic_v00_mik.OX345636.1G200	Female	Male	9.01983	0.382692	7.54124e-05	0.00352553	#N/A
MSTRG.13974.1	0	Female	Male	9.04409	6.88552	1.94261e-05	0.00123813	#N/A
Petfic_v00_mik.OX345653.1G669.2	Petfic_v00_mik.OX345653.1G669	Female	Male	9.04544	0.409989	0.0012468	0.0330413	#N/A
MSTRG.18725.1	Petfic_v00_mik.OX345649.1G257	Female	Male	9.06378	0.424301	5.33034e-05	0.00273247	#N/A
Petfic_v00_mik.OX345648.1G512.2	Petfic_v00_mik.OX345648.1G512	Female	Male	9.09684	0.457172	3.02023e-05	0.0017549	#N/A
MSTRG.4220.5	Petfic_v00_mik.OX345636.1G4978	Female	Male	9.18384	4.39038	5.39534e-06	0.00045665	#N/A
Petfic_v00_mik.OX345640.1G103.2	Petfic_v00_mik.OX345640.1G103	Female	Male	9.20469	0.556476	0.000429482	0.0139932	#N/A
MSTRG.3152.1	Petfic_v00_mik.OX345636.1G3502	Female	Male	9.27892	0.628262	2.06565e-07	3.66049e-05	#N/A
MSTRG.12159.6	Petfic_v00_mik.OX345641.1G653.1	Female	Male	9.27971	0.628765	5.87708e-07	8.43568e-05	#N/A
MSTRG.17712.3	Petfic_v00_mik.OX345648.1G36	Female	Male	9.30333	0.651475	0.00143753	0.0368102	#N/A
Petfic_v00_mik.OX345636.1G5626.1	Petfic_v00_mik.OX345636.1G5624	Female	Male	9.3068	0.654581	1.83784e-07	3.38903e-05	#N/A
MSTRG.8566.3	Petfic_v00_mik.OX345638.1G839	Female	Male	9.30812	0.655989	1.14266e-07	2.4081e-05	#N/A
MSTRG.15094.1	Petfic_v00_mik.OX345644.1G588	Female	Male	9.31597	0.662906	7.10534e-05	0.00335125	#N/A
MSTRG.10241.1	Petfic_v00_mik.OX345639.1G1296	Female	Male	9.32102	0.668129	2.03354e-07	3.66049e-05	#N/A
MSTRG.7538.10	Petfic_v00_mik.OX345637.1G1696	Female	Male	9.35023	0.696148	1.29748e-07	2.70443e-05	#N/A
Petfic_v00_mik.OX345648.1G576.2	Petfic_v00_mik.OX345648.1G576	Female	Male	9.3647	0.709201	4.18601e-06	0.000375524	#N/A
MSTRG.19279.4	Petfic_v00_mik.OX345649.1G814	Female	Male	9.37885	0.723194	8.29276e-08	1.95639e-05	#N/A
Petfic_v00_mik.OX345639.1G1398.2	Petfic_v00_mik.OX345639.1G1398	Female	Male	9.41364	0.75636	1.13289e-07	2.40663e-05	#N/A
Petfic_v00_mik.OX345636.1G2005.1	Petfic_v00_mik.OX345636.1G2004	Female	Male	9.42893	0.771053	4.07855e-05	0.00219679	#N/A
MSTRG.16123.4	Petfic_v00_mik.OX345645.1G673	Female	Male	9.4809	0.819947	0.000285577	0.0100742	#N/A
Petfic_v00_mik.OX345636.1G352.1	Petfic_v00_mik.OX345636.1G352	Female	Male	9.49845	0.837244	3.32137e-06	0.000312332	#N/A
MSTRG.6820.1	Petfic_v00_mik.OX345637.1G948	Female	Male	9.51496	2.82567	0.00158964	0.0395607	#N/A
MSTRG.10074.3	Petfic_v00_mik.OX345639.1G1086	Female	Male	9.52545	0.863568	1.81204e-06	0.000198012	#N/A
MSTRG.20942.2	Petfic_v00_mik.OX345652.1G195	Female	Male	9.54047	6.02831	8.48881e-07	0.000112145	#N/A
MSTRG.17754.5	Petfic_v00_mik.OX345648.1G83	Female	Male	9.57073	0.906605	5.4865e-08	1.3742e-05	#N/A
MSTRG.17223.3	Petfic_v00_mik.OX345647.1G254	Female	Male	9.57154	0.907971	3.32869e-06	0.000312332	#N/A
MSTRG.11282.3	Petfic_v00_mik.OX345640.1G828	Female	Male	9.57975	0.915041	3.39573e-07	5.37401e-05	#N/A
MSTRG.18604.11	Petfic_v00_mik.OX345649.1G115	Female	Male	9.61092	0.943988	9.25603e-05	0.00414193	#N/A
MSTRG.4315.10	Petfic_v00_mik.OX345636.1G5045	Female	Male	9.61216	0.946176	1.40553e-07	2.84905e-05	#N/A
MSTRG.3319.1	Petfic_v00_mik.OX345636.1G3883	Female	Male	9.61395	0.947695	3.93321e-07	6.07224e-05	#N/A
MSTRG.16811.1	Petfic_v00_mik.OX345646.1G619	Female	Male	9.64546	5.17325	1.74438e-10	9.08241e-08	#N/A
MSTRG.13396.1	Petfic_v00_mik.OX345642.1G892	Female	Male	9.65529	0.987597	2.71848e-07	4.54003e-05	#N/A
MSTRG.8605.8	Petfic_v00_mik.OX345638.1G879	Female	Male	9.65633	0.989348	2.61633e-06	0.00026416	#N/A
MSTRG.19082.4	Petfic_v00_mik.OX345649.1G582	Female	Male	9.69274	3.00139	0.000266039	0.00954647	#N/A
MSTRG.8591.9	Petfic_v00_mik.OX345638.1G866	Female	Male	9.70928	1.03979	1.23232e-05	0.000867987	#N/A
Petfic_v00_mik.OX345636.1G341.1	Petfic_v00_mik.OX345636.1G341	Female	Male	9.75812	1.08652	0.000369264	0.012365	#N/A
MSTRG.10236.3	Petfic_v00_mik.OX345639.1G1293	Female	Male	9.76894	1.09699	1.21024e-08	3.8258e-06	#N/A
Petfic_v00_mik.OX345651.1G260.1	Petfic_v00_mik.OX345651.1G260	Female	Male	9.79886	1.12647	1.5564e-06	0.000175867	#N/A
Petfic_v00_mik.OX345644.1G916.1	Petfic_v00_mik.OX345644.1G916	Female	Male	9.80218	1.1289	5.12923e-07	7.4836e-05	#N/A
MSTRG.15074.29	Petfic_v00_mik.OX345644.1G545	Female	Male	9.80301	1.12942	5.81096e-05	0.00288823	#N/A
Petfic_v00_mik.OX345636.1G5174.1	Petfic_v00_mik.OX345636.1G5174	Female	Male	9.8095	1.13555	4.0153e-05	0.00217596	#N/A
MSTRG.13856.1	Petfic_v00_mik.OX345643.1G341	Female	Male	9.83028	6.97975	1.6511e-29	4.38432e-25	#N/A
MSTRG.7417.4	Petfic_v00_mik.OX345637.1G1563	Female	Male	9.84395	1.16895	2.88225e-07	4.73321e-05	#N/A
MSTRG.17014.5	Petfic_v00_mik.OX345647.1G39	Female	Male	9.84581	1.17194	6.20298e-06	0.000506812	#N/A
MSTRG.4168.7	Petfic_v00_mik.OX345636.1G4888	Female	Male	9.88407	1.20701	3.90401e-05	0.00212869	#N/A
MSTRG.10558.1	Petfic_v00_mik.OX345640.1G66	Female	Male	9.88697	1.21039	1.30555e-05	0.000914713	#N/A
Petfic_v00_mik.OX345642.1G673.4	Petfic_v00_mik.OX345642.1G673	Female	Male	9.88904	1.21293	2.89546e-08	8.00897e-06	#N/A
MSTRG.18604.6	Petfic_v00_mik.OX345649.1G115	Female	Male	9.89614	1.21894	0.000767681	0.02265	#N/A
Petfic_v00_mik.OX345637.1G1133.1	Petfic_v00_mik.OX345637.1G1133	Female	Male	9.93174	1.25412	1.62288e-08	4.842e-06	#N/A
MSTRG.7530.3	Petfic_v00_mik.OX345637.1G1646	Female	Male	10.0082	1.32889	5.78423e-05	0.00288571	#N/A
MSTRG.20227.1	0	Female	Male	10.099	1.41627	8.25833e-08	1.95639e-05	#N/A
MSTRG.7080.17	Petfic_v00_mik.OX345637.1G1217	Female	Male	10.1835	1.49785	1.85876e-06	0.00020146	#N/A
MSTRG.14597.5	Petfic_v00_mik.OX345644.1G189	Female	Male	10.2035	1.51767	3.74675e-09	1.42113e-06	#N/A
MSTRG.6649.3	Petfic_v00_mik.OX345637.1G768	Female	Male	10.2056	1.5199	1.32513e-07	2.72771e-05	#N/A
MSTRG.8566.2	Petfic_v00_mik.OX345638.1G839	Female	Male	10.2153	1.52959	6.13266e-07	8.54167e-05	#N/A
MSTRG.8394.7	Petfic_v00_mik.OX345638.1G678	Female	Male	10.2387	1.55177	3.09743e-07	4.95477e-05	#N/A
Petfic_v00_mik.OX345640.1G926.2	Petfic_v00_mik.OX345640.1G926	Female	Male	10.2719	1.58414	2.15117e-09	9.21325e-07	#N/A
MSTRG.4168.15	Petfic_v00_mik.OX345636.1G4888	Female	Male	10.448	1.75477	0.00103477	0.0285925	#N/A
Petfic_v00_mik.OX345639.1G232.1	Petfic_v00_mik.OX345639.1G232	Female	Male	10.5291	7.31822	1.59951e-09	7.07889e-07	#N/A
MSTRG.836.3	Petfic_v00_mik.OX345636.1G888	Female	Male	10.5794	1.88442	5.8498e-06	0.000485423	#N/A
MSTRG.381.1	0	Female	Male	10.6091	1.91431	0.000564988	0.017547	#N/A
Petfic_v00_mik.OX345639.1G102.1	Petfic_v00_mik.OX345639.1G102	Female	Male	10.6147	1.91862	2.64478e-08	7.47122e-06	#N/A
MSTRG.7257.4	Petfic_v00_mik.OX345637.1G1395	Female	Male	10.6578	1.96197	1.13267e-05	0.000819535	#N/A
MSTRG.11376.4	Petfic_v00_mik.OX345640.1G915	Female	Male	10.7069	2.00964	2.87977e-07	4.73321e-05	#N/A
Petfic_v00_mik.OX345653.1G524.1	Petfic_v00_mik.OX345653.1G524	Female	Male	10.718	2.01983	7.90946e-08	1.90934e-05	#N/A
MSTRG.16425.1	Petfic_v00_mik.OX345646.1G201	Female	Male	10.8682	4.82512	0.00165587	0.040713	#N/A
MSTRG.8687.25	Petfic_v00_mik.OX345638.1G887	Female	Male	10.9356	2.23428	5.41578e-05	0.00275499	#N/A
Petfic_v00_mik.OX345645.1G580.1	Petfic_v00_mik.OX345645.1G580	Female	Male	10.9646	2.26226	1.2173e-10	7.18318e-08	#N/A
MSTRG.18500.3	Petfic_v00_mik.OX345649.1G21	Female	Male	11.0281	2.32452	4.26137e-06	0.000380998	#N/A
Petfic_v00_mik.OX345643.1G778.1	Petfic_v00_mik.OX345643.1G778	Female	Male	11.0409	2.33727	2.85517e-11	2.04909e-08	#N/A
MSTRG.8687.21	Petfic_v00_mik.OX345638.1G887	Female	Male	11.0487	2.34523	2.37933e-05	0.00145914	#N/A
Petfic_v00_mik.OX345638.1G946.1	Petfic_v00_mik.OX345638.1G946	Female	Male	11.0714	2.36739	2.67201e-10	1.33873e-07	#N/A
Petfic_v00_mik.OX345638.1G867.2	Petfic_v00_mik.OX345638.1G866	Female	Male	11.1326	2.4276	1.06643e-10	6.5856e-08	#N/A
Petfic_v00_mik.OX345638.1G965.1	Petfic_v00_mik.OX345638.1G965	Female	Male	11.1425	2.43746	2.88762e-07	4.73321e-05	#N/A
MSTRG.1016.10	Petfic_v00_mik.OX345636.1G1067	Female	Male	11.1954	2.48947	7.38603e-11	4.66973e-08	#N/A
MSTRG.20878.1	Petfic_v00_mik.OX345652.1G141	Female	Male	11.2041	2.49792	1.1084e-08	3.54609e-06	#N/A
Petfic_v00_mik.OX345641.1G868.1	Petfic_v00_mik.OX345641.1G868	Female	Male	11.224	2.51739	1.75174e-07	3.29463e-05	#N/A
MSTRG.5415.2	Petfic_v00_mik.OX345636.1G6392	Female	Male	11.3378	2.62987	8.05363e-09	2.75153e-06	#N/A
Petfic_v00_mik.OX345647.1G36.1	Petfic_v00_mik.OX345647.1G36	Female	Male	11.4028	2.69402	3.78427e-09	1.42113e-06	#N/A
MSTRG.17515.9	Petfic_v00_mik.OX345647.1G553	Female	Male	11.4129	2.70444	4.96975e-08	1.26891e-05	#N/A
Petfic_v00_mik.OX345636.1G319.1	Petfic_v00_mik.OX345636.1G319	Female	Male	11.4236	2.71465	0.00029726	0.0103861	#N/A
MSTRG.18602.3	Petfic_v00_mik.OX345649.1G120	Female	Male	11.4415	2.73237	1.70418e-07	3.25559e-05	#N/A
Petfic_v00_mik.OX345641.1G886.1	Petfic_v00_mik.OX345641.1G883	Female	Male	11.548	2.83763	1.4873e-08	4.51861e-06	#N/A
MSTRG.3550.2	Petfic_v00_mik.OX345636.1G4215	Female	Male	11.6399	2.92855	1.66906e-12	1.64149e-09	#N/A
MSTRG.5391.5	Petfic_v00_mik.OX345636.1G6456	Female	Male	11.8184	3.10511	1.13397e-06	0.000139405	#N/A
MSTRG.18963.2	Petfic_v00_mik.OX345649.1G473	Female	Male	11.827	3.11385	2.33585e-13	3.4459e-10	#N/A
Petfic_v00_mik.OX345644.1G863.1	Petfic_v00_mik.OX345644.1G863	Female	Male	12.0246	3.3098	5.05313e-12	4.19315e-09	#N/A
MSTRG.6678.1	Petfic_v00_mik.OX345637.1G805	Female	Male	12.0937	3.37832	5.24122e-15	1.07058e-11	#N/A
Petfic_v00_mik.OX345641.1G107.2	Petfic_v00_mik.OX345641.1G107	Female	Male	12.1038	3.38816	1.19509e-06	0.000144247	#N/A
Petfic_v00_mik.OX345645.1G577.1	Petfic_v00_mik.OX345645.1G577	Female	Male	12.1547	3.43884	1.34273e-10	7.58611e-08	#N/A
MSTRG.20418.1	Petfic_v00_mik.OX345651.1G348	Female	Male	12.2329	3.5163	1.97127e-08	5.68968e-06	#N/A
MSTRG.18196.14	Petfic_v00_mik.OX345648.1G555	Female	Male	12.2431	3.52653	3.39999e-07	5.37401e-05	#N/A
MSTRG.17014.13	Petfic_v00_mik.OX345647.1G39	Female	Male	12.2824	3.56568	3.19264e-12	2.82591e-09	#N/A
MSTRG.21355.1	Petfic_v00_mik.OX345652.1G603	Female	Male	12.2913	3.57453	1.36161e-13	2.25977e-10	#N/A
MSTRG.9889.7	Petfic_v00_mik.OX345639.1G892	Female	Male	12.3029	3.58579	0.000735387	0.0218918	#N/A
Petfic_v00_mik.OX345645.1G576.1	Petfic_v00_mik.OX345645.1G576	Female	Male	12.3197	3.60268	5.92582e-14	1.04903e-10	#N/A
MSTRG.8145.7	Petfic_v00_mik.OX345638.1G404	Female	Male	12.3938	3.67643	1.15155e-09	5.2721e-07	#N/A
MSTRG.10902.1	Petfic_v00_mik.OX345640.1G438	Female	Male	12.4434	3.72588	8.33378e-05	0.00381764	#N/A
Petfic_v00_mik.OX345636.1G1137.2	Petfic_v00_mik.OX345636.1G1137	Female	Male	12.4831	3.76514	1.31036e-12	1.33828e-09	#N/A
MSTRG.8145.16	Petfic_v00_mik.OX345638.1G404	Female	Male	12.4883	3.77029	5.44553e-13	6.57276e-10	#N/A
MSTRG.8145.6	Petfic_v00_mik.OX345638.1G404	Female	Male	12.4954	3.77728	1.0498e-08	3.39957e-06	#N/A
MSTRG.4220.13	Petfic_v00_mik.OX345636.1G4978	Female	Male	12.5487	3.8303	4.79802e-13	6.06698e-10	#N/A
Petfic_v00_mik.OX345639.1G767.1	Petfic_v00_mik.OX345639.1G766	Female	Male	12.9266	4.2064	7.50457e-18	2.21418e-14	#N/A
Petfic_v00_mik.OX345639.1G892.2	Petfic_v00_mik.OX345639.1G892	Female	Male	12.9466	4.22625	1.57658e-14	2.99032e-11	#N/A
MSTRG.12335.3	Petfic_v00_mik.OX345641.1G875	Female	Male	12.9829	4.26239	5.83499e-13	6.73662e-10	#N/A
Petfic_v00_mik.OX345651.1G624.2	Petfic_v00_mik.OX345651.1G624	Female	Male	13.8168	5.09363	3.38716e-24	4.49713e-20	#N/A
MSTRG.937.2	Petfic_v00_mik.OX345636.1G1014	Female	Male	15.1945	6.46938	0.00188277	0.0449173	#N/A

## Sheet: E. Axinella damicornis
Transcript_ID	sampleA	sampleB	logFC	logCPM	PValue	FDR	Sex_loci	ref_gene_id
MSTRG.21718.2	Female	Male	-13.3355	4.76088	3.21338e-11	1.56119e-06	#N/A	NA
MSTRG.28615.5	Female	Male	-12.5648	3.99289	2.91519e-07	0.0015806	#N/A	NA
Adami_g6393.t2	Female	Male	-11.9229	3.35448	3.34915e-07	0.00162715	#N/A	Adami_g6393
Adami_g4838.t1	Female	Male	-11.5014	2.93619	1.76451e-08	0.000428635	#N/A	Adami_g4838
MSTRG.10356.1	Female	Male	-11.4486	2.88415	3.91909e-05	0.0428474	#N/A	NA
MSTRG.20333.1	Female	Male	-11.3888	2.82485	3.96866e-05	0.0428474	#N/A	NA
MSTRG.19619.4	Female	Male	-11.2047	2.64263	1.41781e-05	0.0255121	#N/A	NA
Adami_g8565.t3	Female	Male	-11.0171	2.45735	4.36451e-05	0.0441762	#N/A	Adami_g8565
MSTRG.17715.5	Female	Male	-10.7643	2.20796	2.94002e-05	0.0396773	#N/A	NA
MSTRG.27850.2	Female	Male	-10.6866	2.13131	3.36392e-05	0.0419059	#N/A	NA
MSTRG.32394.9	Female	Male	-10.5203	1.96792	1.08835e-06	0.00311037	#N/A	NA
MSTRG.7385.12	Female	Male	-9.73662	1.20288	3.57704e-06	0.00789941	#N/A	NA
MSTRG.1551.1	Female	Male	-9.5977	1.06815	3.79479e-05	0.0428474	#N/A	NA
MSTRG.3873.1	Female	Male	-9.51482	0.988102	4.69339e-05	0.0465355	#N/A	NA
MSTRG.26192.5	Female	Male	-9.47475	0.949244	1.85263e-05	0.0310373	#N/A	NA
MSTRG.20238.3	Female	Male	-9.3797	0.858203	1.55552e-05	0.0269906	#N/A	NA
MSTRG.252.1	Female	Male	-9.16034	0.647302	1.01209e-05	0.018912	#N/A	NA
MSTRG.25427.9	Female	Male	-9.02313	0.51674	4.33536e-05	0.0441762	#N/A	NA
MSTRG.23738.18	Female	Male	-7.87947	1.16936	2.92769e-05	0.0396773	#N/A	NA
MSTRG.31994.1	Female	Male	-5.57121	4.1389	5.08383e-05	0.0493986	#N/A	NA
MSTRG.18844.13	Female	Male	4.70698	5.70143	2.39056e-05	0.0351949	#N/A	NA
MSTRG.23738.19	Female	Male	8.23425	-0.591985	4.15915e-05	0.0439279	#N/A	NA
MSTRG.25206.6	Female	Male	8.60281	-0.259359	2.15536e-05	0.0349054	#N/A	NA
MSTRG.4527.2	Female	Male	8.81762	1.5306	6.81781e-07	0.00217648	#N/A	NA
MSTRG.9807.1	Female	Male	8.9705	0.0800081	2.30213e-05	0.0351949	#N/A	NA
MSTRG.11185.1	Female	Male	9.00454	0.111566	4.63113e-06	0.00978256	#N/A	NA
MSTRG.28615.1	Female	Male	9.15139	0.249288	3.49864e-05	0.042062	#N/A	NA
MSTRG.15933.2	Female	Male	9.43775	0.51944	1.85312e-06	0.00473852	#N/A	NA
MSTRG.12840.12	Female	Male	9.45246	3.42115	2.80192e-06	0.00680642	#N/A	NA
MSTRG.1280.5	Female	Male	9.58727	0.661721	8.84246e-06	0.0171841	#N/A	NA
MSTRG.3471.6	Female	Male	9.5968	0.670821	5.22271e-05	0.049753	#N/A	NA
MSTRG.16819.3	Female	Male	9.61037	0.683627	3.2315e-05	0.0413156	#N/A	NA
MSTRG.5394.4	Female	Male	9.89985	0.961353	2.3532e-05	0.0351949	#N/A	NA
MSTRG.1085.25	Female	Male	10.017	1.07429	4.88146e-07	0.00182432	#N/A	NA
MSTRG.10779.2	Female	Male	10.0301	3.24534	3.23142e-05	0.0413156	#N/A	NA
MSTRG.1666.2	Female	Male	10.0831	1.13835	6.67801e-06	0.0135185	#N/A	NA
MSTRG.22889.2	Female	Male	10.2115	1.26261	1.35652e-06	0.00366141	#N/A	NA
MSTRG.23127.5	Female	Male	10.2541	1.30387	7.16773e-07	0.00217648	#N/A	NA
MSTRG.504.14	Female	Male	10.4514	1.49587	3.73315e-05	0.0428474	#N/A	NA
Adami_g6379.t1	Female	Male	10.5348	1.57704	1.72463e-07	0.00134551	#N/A	Adami_g6379
MSTRG.29645.13	Female	Male	10.6703	1.70933	2.92799e-07	0.0015806	#N/A	NA
MSTRG.27392.1	Female	Male	10.9211	1.9551	1.55801e-07	0.00134551	#N/A	NA
MSTRG.1579.5	Female	Male	11.0084	2.04081	3.92521e-08	0.000635675	#N/A	NA
MSTRG.22.5	Female	Male	11.0454	2.07721	6.84007e-08	0.000830795	#N/A	NA
MSTRG.28870.16	Female	Male	11.0841	2.1151	3.4503e-06	0.00789941	#N/A	NA
MSTRG.29565.3	Female	Male	11.2126	2.2416	5.33534e-07	0.00185152	#N/A	NA
MSTRG.504.6	Female	Male	11.337	2.36434	2.56943e-05	0.0367156	#N/A	NA
MSTRG.8719.1	Female	Male	11.5852	2.60909	1.93861e-07	0.00134551	#N/A	NA
MSTRG.22943.5	Female	Male	12.3199	3.33698	3.54961e-05	0.042062	#N/A	NA
MSTRG.2182.2	Female	Male	13.7104	4.72107	4.66103e-07	0.00182432	#N/A	NA
MSTRG.7993.1	Female	Male	14.4661	5.47513	4.37381e-07	0.00182432	#N/A	NA

## Sheet: F. Phakellia ventilabrum
Transcript_ID	sampleA	sampleB	logFC	logCPM	PValue	FDR	Sex_loci
g11869.t1	Female	Male	-4.73532	0.217673	0.00097267	0.0178116	FEM
g15022.t1	Female	Male	-11.5007	1.76492	2.8031e-07	0.000144306	MAL
g10990.t2	Female	Male	-9.83203	0.131427	1.6199e-05	0.000895981	MAL
g2148.t1	Female	Male	-6.67934	0.300415	0.000118708	0.00383818	MAL
g8453.t2	Female	Male	-6.37124	1.69061	0.000271122	0.00714641	MAL
g13608.t2	Female	Male	-5.76349	-0.104562	0.00061578	0.0129926	MAL
g12537.t1	Female	Male	-5.13598	1.76173	0.000896182	0.0168352	MAL
g11371.t1	Female	Male	3.81233	3.80933	0.00409824	0.0459339	MAL
MSTRG.30228.18	Female	Male	-18.8757	9.12281	7.04379e-06	0.000560332	#N/A
g9652.t1	Female	Male	-14.2391	4.48828	7.74734e-07	0.000215052	#N/A
MSTRG.14125.5	Female	Male	-14.2174	4.46638	8.84246e-05	0.00312099	#N/A
MSTRG.37694.1	Female	Male	-13.8341	4.08454	4.86717e-09	3.25541e-05	#N/A
MSTRG.46287.1	Female	Male	-13.6478	3.89843	2.03699e-08	8.29574e-05	#N/A
MSTRG.10600.6	Female	Male	-13.6384	3.88907	2.4806e-08	8.29574e-05	#N/A
MSTRG.26898.2	Female	Male	-13.5136	3.76507	5.84681e-08	0.000104284	#N/A
MSTRG.48625.1	Female	Male	-13.0495	3.30134	1.1581e-05	0.000732479	#N/A
MSTRG.12564.2	Female	Male	-13.0192	3.27161	2.91042e-07	0.000144306	#N/A
MSTRG.30540.5	Female	Male	-12.9986	3.25263	2.01695e-05	0.00103986	#N/A
MSTRG.10600.4	Female	Male	-12.8295	3.08291	5.11218e-08	0.00010231	#N/A
MSTRG.48213.5	Female	Male	-12.7294	2.98231	3.95211e-05	0.00170265	#N/A
MSTRG.16480.2	Female	Male	-12.6338	2.88825	4.62415e-08	0.00010231	#N/A
MSTRG.35124.1	Female	Male	-12.6092	2.86497	1.65511e-06	0.00029972	#N/A
MSTRG.14657.3	Female	Male	-12.5763	2.82972	7.1117e-05	0.00266829	#N/A
MSTRG.30549.2	Female	Male	-12.4789	2.73604	3.51153e-05	0.00156588	#N/A
g13697.t1	Female	Male	-12.4782	2.73225	4.36919e-05	0.00185545	#N/A
MSTRG.12800.2	Female	Male	-12.3576	2.61275	5.02275e-06	0.000483832	#N/A
MSTRG.10948.3	Female	Male	-12.352	2.60799	9.54555e-08	0.000127691	#N/A
MSTRG.6936.2	Female	Male	-12.3472	2.60363	2.81695e-08	8.37385e-05	#N/A
g5187.t1	Female	Male	-12.2875	2.54398	7.07604e-08	0.00011136	#N/A
g9751.t1	Female	Male	-12.2741	2.53251	1.64839e-05	0.000905563	#N/A
g1550.t2	Female	Male	-12.2408	2.49798	3.90025e-08	9.48612e-05	#N/A
MSTRG.19825.2	Female	Male	-12.1827	2.4406	1.30546e-07	0.000143879	#N/A
MSTRG.30546.1	Female	Male	-12.165	2.42451	3.66006e-05	0.0016079	#N/A
MSTRG.20050.5	Female	Male	-12.1204	2.37721	3.9124e-06	0.000435968	#N/A
MSTRG.35612.1	Female	Male	-12.1053	2.36278	3.70382e-07	0.000149231	#N/A
MSTRG.19723.2	Female	Male	-12.0781	2.3345	5.23018e-05	0.00209787	#N/A
g3182.t1	Female	Male	-12.072	2.33007	1.25004e-07	0.000143879	#N/A
MSTRG.12503.1	Female	Male	-12.0156	2.27593	8.8412e-06	0.000641095	#N/A
MSTRG.6890.1	Female	Male	-12.004	2.26192	1.25142e-06	0.000263293	#N/A
MSTRG.4283.1	Female	Male	-11.9907	2.25075	1.47552e-06	0.000284657	#N/A
MSTRG.5715.5	Female	Male	-11.9494	2.2105	1.75356e-05	0.000947774	#N/A
MSTRG.35583.1	Female	Male	-11.933	2.19176	6.44457e-07	0.000187411	#N/A
MSTRG.25992.2	Female	Male	-11.9306	2.19114	1.48957e-06	0.000284657	#N/A
g9721.t1	Female	Male	-11.8995	2.15752	1.88934e-05	0.000998963	#N/A
MSTRG.15329.10	Female	Male	-11.8721	2.1332	1.70601e-06	0.000302268	#N/A
MSTRG.38191.1	Female	Male	-11.8323	2.093	1.31731e-07	0.000143879	#N/A
MSTRG.21312.1	Female	Male	-11.7981	2.05848	1.85074e-07	0.000144306	#N/A
MSTRG.46285.1	Female	Male	-11.7892	2.05053	3.15891e-07	0.000144306	#N/A
MSTRG.3733.1	Female	Male	-11.7765	2.03588	7.3601e-06	0.000573721	#N/A
MSTRG.15329.8	Female	Male	-11.766	2.02503	2.50262e-05	0.00122853	#N/A
MSTRG.40269.2	Female	Male	-11.751	2.01187	1.99619e-07	0.000144306	#N/A
MSTRG.29821.1	Female	Male	-11.7206	1.97988	3.53104e-05	0.00156784	#N/A
MSTRG.46286.1	Female	Male	-11.7026	1.96459	1.82676e-07	0.000144306	#N/A
MSTRG.17592.2	Female	Male	-11.6763	1.93771	4.27085e-07	0.000156524	#N/A
MSTRG.41232.1	Female	Male	-11.6706	1.93361	1.51357e-06	0.00028517	#N/A
MSTRG.14764.1	Female	Male	-11.6703	1.93324	1.08167e-06	0.000253421	#N/A
MSTRG.22150.1	Female	Male	-11.6453	1.90776	1.80872e-07	0.000144306	#N/A
MSTRG.30158.16	Female	Male	-11.6448	1.90588	2.4319e-06	0.000353604	#N/A
MSTRG.48625.2	Female	Male	-11.6395	1.90182	1.555e-07	0.000144306	#N/A
g2738.t1	Female	Male	-11.6219	1.88295	4.88239e-06	0.000480234	#N/A
MSTRG.4049.1	Female	Male	-11.6201	1.88329	5.12408e-07	0.000171046	#N/A
MSTRG.26936.1	Female	Male	-11.5982	1.8616	5.46742e-07	0.000174137	#N/A
MSTRG.4583.3	Female	Male	-11.5615	1.82519	3.6663e-07	0.000149231	#N/A
MSTRG.26315.4	Female	Male	-11.5517	1.81548	4.10834e-07	0.000154809	#N/A
MSTRG.26962.3	Female	Male	-11.5364	1.80013	2.23075e-07	0.000144306	#N/A
MSTRG.34472.2	Female	Male	-11.5322	1.79606	2.91852e-07	0.000144306	#N/A
MSTRG.33631.3	Female	Male	-11.5168	1.78152	1.44815e-06	0.000284657	#N/A
MSTRG.12940.1	Female	Male	-11.5013	1.76527	2.11794e-07	0.000144306	#N/A
MSTRG.305.3	Female	Male	-11.454	1.71779	6.00018e-07	0.000182419	#N/A
MSTRG.27517.5	Female	Male	-11.4527	1.71767	4.84876e-07	0.000170083	#N/A
g13808.t3	Female	Male	-11.4136	1.67879	2.9965e-07	0.000144306	#N/A
MSTRG.42347.1	Female	Male	-11.4101	1.67506	2.367e-07	0.000144306	#N/A
MSTRG.28611.2	Female	Male	-11.4089	1.67327	6.313e-07	0.000185602	#N/A
MSTRG.5856.1	Female	Male	-11.3909	1.65757	3.98552e-06	0.000435968	#N/A
MSTRG.33024.2	Female	Male	-11.3792	1.64601	3.9412e-06	0.000435968	#N/A
MSTRG.2873.1	Female	Male	-11.361	1.62817	5.85682e-06	0.000508744	#N/A
MSTRG.25622.1	Female	Male	-11.3389	1.60636	5.08342e-06	0.000483832	#N/A
MSTRG.2885.1	Female	Male	-11.3335	1.60126	7.82322e-06	0.000592925	#N/A
MSTRG.48211.1	Female	Male	-11.3326	1.59848	2.67448e-07	0.000144306	#N/A
MSTRG.6548.1	Female	Male	-11.3195	1.58619	6.1182e-07	0.000183917	#N/A
MSTRG.11380.6	Female	Male	-11.3058	1.57219	2.74591e-07	0.000144306	#N/A
MSTRG.6456.1	Female	Male	-11.3023	1.57032	5.60703e-06	0.000501552	#N/A
MSTRG.25321.1	Female	Male	-11.3009	1.56813	1.04862e-06	0.000253421	#N/A
MSTRG.6487.6	Female	Male	-11.2819	1.54905	5.90218e-07	0.000181502	#N/A
g15789.t1	Female	Male	-11.2774	1.54295	1.73097e-06	0.000304673	#N/A
MSTRG.28752.2	Female	Male	-11.2727	1.53829	1.88784e-06	0.000317336	#N/A
g7624.t1	Female	Male	-11.2606	1.52736	3.03524e-07	0.000144306	#N/A
MSTRG.16865.1	Female	Male	-11.2494	1.51633	2.93105e-07	0.000144306	#N/A
MSTRG.39840.1	Female	Male	-11.2391	1.50531	1.35499e-06	0.000272567	#N/A
g2927.t1	Female	Male	-11.2335	1.50121	4.89511e-07	0.000170083	#N/A
MSTRG.38693.1	Female	Male	-11.2305	1.49944	5.51064e-06	0.000494737	#N/A
MSTRG.24737.2	Female	Male	-11.2121	1.47949	3.07451e-07	0.000144306	#N/A
MSTRG.17912.2	Female	Male	-11.1897	1.45792	3.69987e-07	0.000149231	#N/A
g3840.t1	Female	Male	-11.1896	1.45768	3.19057e-07	0.000144306	#N/A
MSTRG.23459.1	Female	Male	-11.1895	1.45906	5.10606e-06	0.000483832	#N/A
MSTRG.46993.1	Female	Male	-11.1823	1.45049	3.39868e-07	0.000144331	#N/A
MSTRG.19036.2	Female	Male	-11.1741	1.44412	8.09107e-06	0.000604661	#N/A
MSTRG.34671.2	Female	Male	-11.1561	1.42404	4.42393e-07	0.000159943	#N/A
MSTRG.24660.1	Female	Male	-11.1313	1.4022	1.18885e-05	0.000746631	#N/A
g8035.t1	Female	Male	-11.1279	1.39666	3.04943e-07	0.000144306	#N/A
MSTRG.29604.3	Female	Male	-11.1006	1.36884	1.26702e-06	0.000263293	#N/A
MSTRG.950.1	Female	Male	-11.098	1.36808	1.1442e-06	0.000259824	#N/A
MSTRG.24676.1	Female	Male	-11.0875	1.35737	4.98671e-07	0.000171044	#N/A
MSTRG.12276.1	Female	Male	-11.0698	1.34141	7.22523e-06	0.000568345	#N/A
MSTRG.49022.2	Female	Male	-11.0646	1.33368	7.32147e-07	0.000206188	#N/A
MSTRG.8842.2	Female	Male	-11.0538	1.32455	9.87279e-07	0.000249186	#N/A
MSTRG.3137.1	Female	Male	-11.052	1.32363	4.84379e-06	0.000478194	#N/A
MSTRG.25783.1	Female	Male	-11.0508	1.32234	3.79414e-06	0.000431951	#N/A
g5715.t1	Female	Male	-11.0488	1.32025	3.37612e-06	0.000410567	#N/A
MSTRG.2446.1	Female	Male	-11.0405	1.31214	3.74221e-06	0.000430682	#N/A
MSTRG.13337.1	Female	Male	-11.0291	1.29711	1.28325e-05	0.000771811	#N/A
MSTRG.35798.1	Female	Male	-11.0231	1.29397	5.70791e-07	0.000178688	#N/A
MSTRG.16867.1	Female	Male	-11.0217	1.29124	1.15823e-06	0.000259824	#N/A
MSTRG.35802.2	Female	Male	-11.0199	1.29125	1.23527e-06	0.000262449	#N/A
MSTRG.31145.4	Female	Male	-11.0186	1.28725	6.02e-06	0.000512927	#N/A
MSTRG.10516.1	Female	Male	-11.0182	1.29084	1.02644e-05	0.000698029	#N/A
MSTRG.23302.2	Female	Male	-11.0132	1.28157	1.11024e-05	0.000724469	#N/A
g9880.t3	Female	Male	-11.0054	1.2762	3.73719e-07	0.000149231	#N/A
MSTRG.20484.1	Female	Male	-10.9816	1.25371	1.63634e-06	0.00029972	#N/A
MSTRG.48292.2	Female	Male	-10.9767	1.24802	3.91969e-07	0.000154217	#N/A
MSTRG.29348.2	Female	Male	-10.9635	1.2345	5.74387e-07	0.000178688	#N/A
MSTRG.9901.1	Female	Male	-10.9566	1.22842	5.17857e-07	0.000171046	#N/A
MSTRG.47813.1	Female	Male	-10.9542	1.22807	1.38859e-05	0.000809373	#N/A
MSTRG.12372.1	Female	Male	-10.9501	1.22085	1.23305e-06	0.000262449	#N/A
MSTRG.38187.1	Female	Male	-10.9348	1.20765	1.48305e-06	0.000284657	#N/A
MSTRG.33061.1	Female	Male	-10.9306	1.20256	4.10635e-07	0.000154809	#N/A
MSTRG.33368.1	Female	Male	-10.9125	1.18475	4.24427e-07	0.000156524	#N/A
MSTRG.7236.1	Female	Male	-10.9036	1.17697	1.50568e-06	0.00028517	#N/A
MSTRG.44991.1	Female	Male	-10.8888	1.16296	3.75156e-06	0.000430682	#N/A
g832.t2	Female	Male	-10.8817	1.156	3.9584e-06	0.000435968	#N/A
MSTRG.10422.1	Female	Male	-10.8816	1.15277	4.6022e-06	0.000471752	#N/A
MSTRG.26770.1	Female	Male	-10.8813	1.15584	5.14002e-06	0.000483832	#N/A
MSTRG.18691.1	Female	Male	-10.8696	1.14339	1.16384e-06	0.000259824	#N/A
MSTRG.50350.1	Female	Male	-10.8667	5.53183	2.14904e-06	0.000334374	#N/A
MSTRG.47108.1	Female	Male	-10.8619	1.13731	1.17202e-05	0.000737796	#N/A
MSTRG.43461.1	Female	Male	-10.8574	1.13193	2.85296e-06	0.00038164	#N/A
MSTRG.46421.2	Female	Male	-10.8506	1.12268	2.51378e-06	0.000361289	#N/A
MSTRG.3000.1	Female	Male	-10.8445	1.1198	6.019e-06	0.000512927	#N/A
MSTRG.21302.1	Female	Male	-10.8413	1.11556	1.09153e-06	0.000253421	#N/A
MSTRG.30744.3	Female	Male	-10.8394	1.11028	1.95987e-05	0.00101814	#N/A
MSTRG.33353.1	Female	Male	-10.8388	1.11341	1.8978e-06	0.000317336	#N/A
MSTRG.32848.2	Female	Male	-10.8386	1.11043	5.23844e-06	0.00048663	#N/A
MSTRG.16968.4	Female	Male	-10.8373	1.11294	7.90284e-06	0.000594959	#N/A
MSTRG.20653.1	Female	Male	-10.8365	1.11142	2.96002e-06	0.000390624	#N/A
MSTRG.49148.1	Female	Male	-10.8326	1.10804	5.92892e-06	0.000511685	#N/A
g12011.t2	Female	Male	-10.8314	1.10515	4.86639e-07	0.000170083	#N/A
MSTRG.37319.1	Female	Male	-10.8293	1.10497	7.28525e-06	0.000569911	#N/A
MSTRG.37623.1	Female	Male	-10.827	1.10236	3.98647e-06	0.000435968	#N/A
MSTRG.13835.1	Female	Male	-10.8259	1.10098	2.46373e-06	0.000356295	#N/A
g725.t1	Female	Male	-10.8095	1.08596	1.29512e-05	0.000774281	#N/A
MSTRG.25061.1	Female	Male	-10.8076	1.08282	1.84566e-06	0.00031653	#N/A
MSTRG.22632.1	Female	Male	-10.7961	1.07154	2.03134e-06	0.00032951	#N/A
MSTRG.6763.4	Female	Male	-10.796	1.06904	3.10211e-06	0.000402883	#N/A
MSTRG.14199.2	Female	Male	-10.7921	1.06441	9.49367e-06	0.000671941	#N/A
g13880.t2	Female	Male	-10.7911	1.06478	1.16539e-06	0.000259824	#N/A
MSTRG.32134.1	Female	Male	-10.7904	1.06553	1.09878e-06	0.000253421	#N/A
MSTRG.18574.1	Female	Male	-10.7659	1.04144	1.06924e-06	0.000253421	#N/A
MSTRG.3918.1	Female	Male	-10.7571	1.0329	1.2049e-06	0.000262079	#N/A
MSTRG.50210.17	Female	Male	-10.7448	1.02197	6.44244e-06	0.000530341	#N/A
MSTRG.44692.1	Female	Male	-10.7368	1.01159	1.28673e-06	0.000264809	#N/A
MSTRG.50543.1	Female	Male	-10.7314	1.00738	7.79696e-07	0.000215052	#N/A
MSTRG.10966.1	Female	Male	-10.7294	1.00561	1.08208e-06	0.000253421	#N/A
MSTRG.27058.6	Female	Male	-10.7201	0.998214	1.15503e-05	0.000732269	#N/A
MSTRG.17979.1	Female	Male	-10.6977	0.972577	3.69807e-06	0.000430166	#N/A
g9180.t1	Female	Male	-10.6907	0.967426	8.03447e-07	0.000217227	#N/A
MSTRG.12181.2	Female	Male	-10.69	0.967435	2.01157e-06	0.00032951	#N/A
MSTRG.47588.1	Female	Male	-10.6889	0.96665	3.30295e-06	0.000409107	#N/A
MSTRG.10842.1	Female	Male	-10.6881	0.964401	7.22884e-07	0.000205745	#N/A
MSTRG.31628.4	Female	Male	-10.6862	0.96275	7.1132e-07	0.000204631	#N/A
MSTRG.38442.1	Female	Male	-10.6836	0.961777	4.80498e-06	0.00047789	#N/A
MSTRG.41419.2	Female	Male	-10.6835	0.960754	1.33075e-06	0.000271777	#N/A
MSTRG.23191.1	Female	Male	-10.6806	0.959485	1.14335e-05	0.000728874	#N/A
MSTRG.35801.1	Female	Male	-10.6653	0.943854	5.48986e-06	0.000494531	#N/A
MSTRG.46855.1	Female	Male	-10.6652	0.943025	2.0117e-06	0.00032951	#N/A
MSTRG.45383.1	Female	Male	-10.6642	0.940336	1.75092e-06	0.000305028	#N/A
MSTRG.3076.1	Female	Male	-10.6635	0.941268	1.65801e-06	0.00029972	#N/A
MSTRG.9476.1	Female	Male	-10.6626	0.940852	3.08789e-06	0.000402883	#N/A
MSTRG.4308.1	Female	Male	-10.6531	0.932562	1.23065e-05	0.000762147	#N/A
MSTRG.1648.1	Female	Male	-10.6525	0.930016	8.97417e-07	0.000233102	#N/A
g13819.t1	Female	Male	-10.6456	0.924442	4.48809e-06	0.00047088	#N/A
MSTRG.46716.1	Female	Male	-10.6421	0.92136	6.68994e-06	0.000539451	#N/A
MSTRG.4201.1	Female	Male	-10.6268	0.905542	2.22682e-06	0.000341187	#N/A
MSTRG.26770.3	Female	Male	-10.6247	0.899767	1.87233e-05	0.000993897	#N/A
MSTRG.25551.2	Female	Male	-10.6211	0.89932	1.09488e-06	0.000253421	#N/A
MSTRG.35573.1	Female	Male	-10.6096	0.889381	5.78591e-06	0.000507529	#N/A
MSTRG.22607.1	Female	Male	-10.6005	0.879916	2.74907e-06	0.000371574	#N/A
MSTRG.7467.1	Female	Male	-10.5794	0.856605	4.71259e-06	0.000477207	#N/A
MSTRG.13379.1	Female	Male	-10.5756	0.856412	8.83884e-06	0.000641095	#N/A
MSTRG.28494.1	Female	Male	-10.5718	0.851085	1.19505e-06	0.000262069	#N/A
MSTRG.23132.1	Female	Male	-10.5634	0.843726	3.46065e-06	0.000413987	#N/A
MSTRG.1927.1	Female	Male	-10.562	0.840553	1.46476e-06	0.000284657	#N/A
MSTRG.40784.1	Female	Male	-10.5607	0.841449	5.71357e-06	0.000504491	#N/A
g16321.t1	Female	Male	-10.5589	0.839833	7.07793e-06	0.000560332	#N/A
g6352.t1	Female	Male	-10.5569	0.833587	1.69766e-05	0.000922462	#N/A
MSTRG.45510.2	Female	Male	-10.5569	0.836913	2.04518e-06	0.00032951	#N/A
MSTRG.32572.1	Female	Male	-10.5537	0.835099	1.02425e-05	0.000698029	#N/A
MSTRG.1866.1	Female	Male	-10.553	0.833843	5.34537e-06	0.000490484	#N/A
MSTRG.47257.1	Female	Male	-10.5392	0.820142	3.87771e-06	0.000435968	#N/A
MSTRG.41359.1	Female	Male	-10.5374	0.817889	2.14673e-06	0.000334374	#N/A
MSTRG.9881.1	Female	Male	-10.5368	0.81584	1.70488e-06	0.000302268	#N/A
MSTRG.30489.3	Female	Male	-10.53	10.1733	0.00266247	0.0342356	#N/A
g7545.t1	Female	Male	-10.5223	0.80323	2.63221e-06	0.000363059	#N/A
MSTRG.4588.1	Female	Male	-10.5202	0.802533	1.28376e-05	0.000771811	#N/A
MSTRG.2282.1	Female	Male	-10.5156	0.796837	3.2521e-06	0.000406573	#N/A
MSTRG.37552.1	Female	Male	-10.5153	0.795121	1.35465e-06	0.000272567	#N/A
MSTRG.3527.1	Female	Male	-10.5085	0.78965	2.40323e-06	0.000353604	#N/A
MSTRG.13497.1	Female	Male	-10.5073	0.788868	3.88707e-06	0.000435968	#N/A
MSTRG.33039.1	Female	Male	-10.5058	0.786218	1.17778e-06	0.000260416	#N/A
MSTRG.35830.6	Female	Male	-10.505	0.783774	5.62404e-06	0.000501552	#N/A
MSTRG.21948.4	Female	Male	-10.5037	0.782988	3.27393e-06	0.000407398	#N/A
MSTRG.24128.1	Female	Male	-10.5035	0.784539	1.86429e-06	0.000317336	#N/A
MSTRG.28892.1	Female	Male	-10.4996	0.781416	4.41403e-06	0.000466771	#N/A
MSTRG.2160.1	Female	Male	-10.4919	0.773016	1.54302e-06	0.000288685	#N/A
MSTRG.3499.1	Female	Male	-10.4824	0.764474	3.48161e-06	0.000413987	#N/A
MSTRG.17519.1	Female	Male	-10.4818	0.763563	2.54673e-06	0.000361289	#N/A
g7996.t1	Female	Male	-10.477	0.758805	2.23173e-06	0.000341187	#N/A
MSTRG.40330.1	Female	Male	-10.474	0.756329	4.16617e-06	0.000447638	#N/A
MSTRG.7568.1	Female	Male	-10.4691	0.750582	1.41491e-06	0.000280403	#N/A
MSTRG.39475.1	Female	Male	-10.4571	0.739281	2.29066e-06	0.00034624	#N/A
MSTRG.29785.1	Female	Male	-10.4475	0.729943	2.41009e-06	0.000353604	#N/A
MSTRG.24648.1	Female	Male	-10.4466	0.730016	7.07701e-06	0.000560332	#N/A
MSTRG.2454.1	Female	Male	-10.4452	0.727743	2.40319e-06	0.000353604	#N/A
g12717.t1	Female	Male	-10.4433	0.725361	1.5551e-06	0.000288924	#N/A
MSTRG.30751.1	Female	Male	-10.4417	0.724387	2.63916e-06	0.000363059	#N/A
MSTRG.5299.2	Female	Male	-10.4347	0.718038	4.75823e-06	0.00047789	#N/A
g5324.t2	Female	Male	-10.4279	0.711379	4.79791e-06	0.00047789	#N/A
MSTRG.10653.2	Female	Male	-10.4246	0.708476	6.59943e-06	0.000538024	#N/A
MSTRG.24686.1	Female	Male	-10.4207	0.704594	6.1857e-06	0.000522058	#N/A
MSTRG.31859.1	Female	Male	-10.4182	0.701168	2.13457e-06	0.000334374	#N/A
MSTRG.22462.1	Female	Male	-10.4151	0.699441	8.7879e-06	0.000641095	#N/A
MSTRG.24751.1	Female	Male	-10.4127	0.695995	2.59284e-06	0.00036262	#N/A
MSTRG.6467.1	Female	Male	-10.4112	0.695535	8.19097e-06	0.000610421	#N/A
MSTRG.46005.1	Female	Male	-10.4095	0.693064	3.25036e-06	0.000406573	#N/A
g7861.t1	Female	Male	-10.3949	0.675882	1.0026e-05	0.000689552	#N/A
MSTRG.37411.1	Female	Male	-10.3939	0.679032	1.20392e-05	0.00075081	#N/A
MSTRG.38718.1	Female	Male	-10.3921	0.675676	2.27754e-06	0.000346212	#N/A
MSTRG.4076.1	Female	Male	-10.392	0.676426	5.48831e-06	0.000494531	#N/A
MSTRG.29389.1	Female	Male	-10.3906	0.674824	4.06903e-06	0.000442532	#N/A
MSTRG.4812.4	Female	Male	-10.3844	0.667529	1.77235e-06	0.000305919	#N/A
MSTRG.35796.1	Female	Male	-10.3839	0.669316	1.30523e-05	0.000774281	#N/A
MSTRG.24411.1	Female	Male	-10.3802	0.66541	8.84219e-06	0.000641095	#N/A
MSTRG.4434.1	Female	Male	-10.3759	0.660893	6.69424e-06	0.000539451	#N/A
MSTRG.2441.1	Female	Male	-10.3736	0.657801	2.60234e-06	0.00036262	#N/A
MSTRG.19702.2	Female	Male	-10.3673	0.651888	3.3736e-06	0.000410567	#N/A
MSTRG.12018.1	Female	Male	-10.3617	0.645457	1.88619e-06	0.000317336	#N/A
g8755.t1	Female	Male	-10.3609	0.646844	1.20358e-05	0.00075081	#N/A
g2462.t1	Female	Male	-10.3596	0.642825	2.64621e-06	0.000363059	#N/A
MSTRG.20156.2	Female	Male	-10.3552	0.63941	1.96934e-06	0.000327253	#N/A
MSTRG.37625.1	Female	Male	-10.3552	0.640609	6.30192e-06	0.000525239	#N/A
MSTRG.11297.2	Female	Male	-10.3544	0.638728	2.14967e-06	0.000334374	#N/A
g13767.t1	Female	Male	-10.353	0.636761	2.08984e-06	0.000332808	#N/A
MSTRG.46074.1	Female	Male	-10.3445	0.629243	2.42818e-06	0.000353604	#N/A
MSTRG.9854.1	Female	Male	-10.3338	0.619958	7.74896e-06	0.000589626	#N/A
MSTRG.35401.1	Female	Male	-10.3337	0.619019	3.45021e-06	0.000413987	#N/A
MSTRG.8676.4	Female	Male	-10.3323	0.616184	3.02109e-06	0.000396208	#N/A
MSTRG.33421.1	Female	Male	-10.3319	0.616448	2.05191e-06	0.00032951	#N/A
MSTRG.369.1	Female	Male	-10.3317	0.618126	9.66383e-06	0.000680807	#N/A
g4886.t1	Female	Male	-10.3317	0.613183	3.02232e-05	0.00140137	#N/A
g15640.t1	Female	Male	-10.323	0.608391	2.74993e-06	0.000371574	#N/A
MSTRG.4296.1	Female	Male	-10.3214	0.607093	3.51523e-06	0.000416135	#N/A
MSTRG.1991.1	Female	Male	-10.3167	0.603266	7.84846e-06	0.000593158	#N/A
MSTRG.20333.1	Female	Male	-10.3075	0.594753	1.21163e-05	0.00075386	#N/A
MSTRG.8134.1	Female	Male	-10.3064	0.592588	4.32283e-06	0.00045894	#N/A
MSTRG.4019.1	Female	Male	-10.3062	0.592092	3.15864e-06	0.000406573	#N/A
MSTRG.20202.1	Female	Male	-10.3018	0.589301	1.31115e-05	0.000775105	#N/A
g7716.t1	Female	Male	-10.3011	0.584458	1.16877e-05	0.000737483	#N/A
MSTRG.35306.1	Female	Male	-10.2969	0.582551	2.34925e-06	0.0003531	#N/A
MSTRG.26145.2	Female	Male	-10.2969	0.584452	1.31324e-05	0.000775105	#N/A
MSTRG.31927.1	Female	Male	-10.2968	0.583444	5.06774e-06	0.000483832	#N/A
MSTRG.17133.2	Female	Male	-10.2936	0.580385	5.39946e-06	0.000493028	#N/A
MSTRG.7788.1	Female	Male	-10.2778	0.565048	5.77959e-06	0.000507529	#N/A
MSTRG.3475.1	Female	Male	-10.2768	0.564366	7.91678e-06	0.000594959	#N/A
MSTRG.2173.1	Female	Male	-10.2746	0.562477	9.73196e-06	0.000681594	#N/A
MSTRG.32054.1	Female	Male	-10.2719	0.558949	4.21257e-06	0.000449016	#N/A
MSTRG.38588.2	Female	Male	-10.2698	0.55463	6.68098e-06	0.000539451	#N/A
MSTRG.2714.1	Female	Male	-10.2666	0.553938	5.19035e-06	0.000485534	#N/A
g12823.t1	Female	Male	-10.264	0.55047	2.55228e-06	0.000361289	#N/A
MSTRG.22838.1	Female	Male	-10.2638	0.55194	1.05023e-05	0.000705979	#N/A
MSTRG.44220.1	Female	Male	-10.2559	0.54191	3.3535e-06	0.000410567	#N/A
MSTRG.17743.1	Female	Male	-10.2431	0.53136	6.6162e-06	0.000538024	#N/A
MSTRG.24811.2	Female	Male	-10.2425	0.531278	1.13963e-05	0.000728874	#N/A
g10551.t1	Female	Male	-10.2399	0.527669	3.99238e-06	0.000435968	#N/A
MSTRG.26532.1	Female	Male	-10.2361	0.524414	6.24767e-06	0.000524853	#N/A
MSTRG.6158.1	Female	Male	-10.2356	0.523808	5.3445e-06	0.000490484	#N/A
MSTRG.14081.1	Female	Male	-10.2339	0.522482	7.58848e-06	0.000583397	#N/A
MSTRG.40875.1	Female	Male	-10.2305	0.519297	8.07923e-06	0.000604661	#N/A
g15687.t1	Female	Male	-10.2304	0.51486	2.61546e-05	0.00126521	#N/A
MSTRG.16244.5	Female	Male	-10.2259	0.512665	3.71983e-06	0.000430682	#N/A
MSTRG.37205.1	Female	Male	-10.2242	0.51294	7.24398e-06	0.000568345	#N/A
MSTRG.8517.1	Female	Male	-10.2226	0.511063	5.44528e-06	0.000493841	#N/A
MSTRG.47261.1	Female	Male	-10.2201	0.50798	3.18035e-06	0.000406573	#N/A
MSTRG.27053.1	Female	Male	-10.2155	0.504602	7.75766e-06	0.000589626	#N/A
MSTRG.32072.1	Female	Male	-10.2148	0.502831	3.23716e-06	0.000406573	#N/A
MSTRG.47285.1	Female	Male	-10.2144	0.503921	1.08752e-05	0.000719651	#N/A
MSTRG.18432.1	Female	Male	-10.2144	0.503331	6.85839e-06	0.000551019	#N/A
MSTRG.6019.1	Female	Male	-10.2128	0.4974	3.51173e-05	0.00156588	#N/A
g15748.t1	Female	Male	-10.2121	0.501378	8.34686e-06	0.000616883	#N/A
MSTRG.5830.1	Female	Male	-10.2099	0.499423	1.02044e-05	0.000698029	#N/A
MSTRG.4039.1	Female	Male	-10.2086	0.497551	5.84686e-06	0.000508744	#N/A
MSTRG.50412.1	Female	Male	-10.206	0.493841	3.18241e-06	0.000406573	#N/A
MSTRG.37132.1	Female	Male	-10.2038	0.493602	1.10254e-05	0.000721208	#N/A
MSTRG.31150.3	Female	Male	-10.2037	0.491846	3.22656e-06	0.000406573	#N/A
MSTRG.23669.1	Female	Male	-10.2006	0.489776	5.97056e-06	0.000511976	#N/A
MSTRG.31624.1	Female	Male	-10.2006	0.489194	3.81777e-06	0.000432799	#N/A
g10467.t2	Female	Male	-10.2003	0.488586	3.31827e-06	0.000409111	#N/A
MSTRG.11773.1	Female	Male	-10.1987	0.487831	5.6683e-06	0.000503107	#N/A
MSTRG.31534.4	Female	Male	-10.1981	0.486612	3.48133e-06	0.000413987	#N/A
MSTRG.1233.1	Female	Male	-10.1905	0.476997	1.25241e-05	0.00076675	#N/A
MSTRG.25632.1	Female	Male	-10.1905	0.480598	1.12844e-05	0.000728874	#N/A
MSTRG.5956.1	Female	Male	-10.1811	0.470193	4.12191e-06	0.000446468	#N/A
MSTRG.3946.1	Female	Male	-10.1787	0.467584	3.59905e-06	0.000420476	#N/A
MSTRG.16968.3	Female	Male	-10.1758	0.466163	9.95269e-06	0.000689552	#N/A
MSTRG.20782.1	Female	Male	-10.1676	0.458222	1.0014e-05	0.000689552	#N/A
MSTRG.32953.3	Female	Male	-10.1657	0.456232	9.47953e-06	0.000671941	#N/A
MSTRG.18424.1	Female	Male	-10.1655	0.455586	6.35436e-06	0.000525242	#N/A
MSTRG.43215.1	Female	Male	-10.1638	0.454887	1.43992e-05	0.000826685	#N/A
g14964.t1	Female	Male	-10.1637	0.4536	5.0927e-06	0.000483832	#N/A
MSTRG.3324.1	Female	Male	-10.1587	0.449566	1.0894e-05	0.000719651	#N/A
MSTRG.24155.1	Female	Male	-10.1539	0.444886	1.02797e-05	0.000698029	#N/A
MSTRG.3971.1	Female	Male	-10.1522	0.442223	4.72676e-06	0.000477207	#N/A
MSTRG.20891.1	Female	Male	-10.152	0.442218	5.43895e-06	0.000493841	#N/A
MSTRG.23217.1	Female	Male	-10.1516	0.442872	1.26007e-05	0.000767708	#N/A
g3275.t1	Female	Male	-10.1456	0.432782	2.25866e-05	0.00113587	#N/A
MSTRG.3955.1	Female	Male	-10.1444	0.435478	9.1154e-06	0.000655729	#N/A
g4513.t1	Female	Male	-10.143	0.432101	5.15347e-06	0.000483832	#N/A
MSTRG.39459.1	Female	Male	-10.139	0.43075	1.47735e-05	0.000839171	#N/A
MSTRG.4024.1	Female	Male	-10.1378	0.428031	4.59061e-06	0.000471752	#N/A
MSTRG.38420.1	Female	Male	-10.1333	0.42256	5.85165e-06	0.000508744	#N/A
MSTRG.29207.1	Female	Male	-10.1318	0.422595	5.96777e-06	0.000511976	#N/A
g11716.t1	Female	Male	-10.1286	0.419174	4.79086e-06	0.00047789	#N/A
MSTRG.20098.1	Female	Male	-10.1253	0.417155	1.14423e-05	0.000728874	#N/A
MSTRG.21548.1	Female	Male	-10.1232	0.412966	5.11415e-06	0.000483832	#N/A
MSTRG.15779.2	Female	Male	-10.1217	0.40945	2.43173e-05	0.00120909	#N/A
MSTRG.30413.1	Female	Male	-10.1199	0.410232	4.56371e-06	0.000471752	#N/A
g6569.t1	Female	Male	-10.1179	0.408892	5.35327e-06	0.000490484	#N/A
MSTRG.14370.2	Female	Male	-10.1173	0.407463	4.82822e-06	0.000478194	#N/A
MSTRG.40973.1	Female	Male	-10.113	0.404063	5.2919e-06	0.000489895	#N/A
MSTRG.20478.1	Female	Male	-10.1019	0.394441	1.2494e-05	0.000766665	#N/A
MSTRG.41328.1	Female	Male	-10.0992	0.390121	4.94602e-06	0.000483832	#N/A
MSTRG.29253.11	Female	Male	-10.0928	0.385375	1.05364e-05	0.000706493	#N/A
MSTRG.49335.3	Female	Male	-10.092	0.384682	1.11935e-05	0.000726874	#N/A
MSTRG.13502.1	Female	Male	-10.0919	0.383131	5.0402e-06	0.000483832	#N/A
MSTRG.40592.1	Female	Male	-10.0917	0.383942	7.66176e-06	0.000587343	#N/A
g4469.t1	Female	Male	-10.091	0.382459	5.13996e-06	0.000483832	#N/A
MSTRG.10608.5	Female	Male	-10.0908	0.384012	1.56508e-05	0.000872336	#N/A
MSTRG.41739.3	Female	Male	-10.0904	0.383295	1.27119e-05	0.000768695	#N/A
MSTRG.6854.1	Female	Male	-10.0896	0.379471	1.09595e-05	0.000720422	#N/A
MSTRG.15823.1	Female	Male	-10.0891	0.381884	1.13162e-05	0.000728874	#N/A
MSTRG.49465.1	Female	Male	-10.087	0.379775	1.06407e-05	0.000708164	#N/A
MSTRG.33478.4	Female	Male	-10.0862	0.378307	6.59164e-06	0.000538024	#N/A
MSTRG.37520.1	Female	Male	-10.0857	0.378359	9.48633e-06	0.000671941	#N/A
MSTRG.28809.1	Female	Male	-10.0841	0.376967	1.06274e-05	0.000708164	#N/A
MSTRG.14686.1	Female	Male	-10.0839	0.376217	7.42206e-06	0.000575564	#N/A
MSTRG.5513.8	Female	Male	-10.0823	0.374823	8.23144e-06	0.000611733	#N/A
MSTRG.35799.2	Female	Male	-10.0746	0.367811	1.15209e-05	0.000732138	#N/A
MSTRG.12577.2	Female	Male	-10.0655	0.359335	1.50475e-05	0.000849326	#N/A
MSTRG.24559.1	Female	Male	-10.063	0.355596	6.25806e-06	0.000524853	#N/A
MSTRG.34121.7	Female	Male	-10.0629	0.353088	1.65859e-05	0.000907441	#N/A
g14668.t1	Female	Male	-10.0609	0.353441	6.13728e-06	0.00051961	#N/A
MSTRG.14978.1	Female	Male	-10.0599	0.352775	7.01305e-06	0.000560332	#N/A
MSTRG.12501.3	Female	Male	-10.053	0.346372	8.65501e-06	0.0006344	#N/A
MSTRG.6214.2	Female	Male	-10.0433	0.337014	9.29988e-06	0.000665265	#N/A
MSTRG.43280.1	Female	Male	-10.0428	0.335298	6.34619e-06	0.000525242	#N/A
g12839.t1	Female	Male	-10.0379	0.331981	1.09442e-05	0.000720422	#N/A
MSTRG.446.2	Female	Male	-10.036	0.327833	1.03939e-05	0.000700447	#N/A
MSTRG.46008.1	Female	Male	-10.0332	0.327649	1.22202e-05	0.000758559	#N/A
MSTRG.29971.5	Female	Male	-10.0331	0.326774	7.49243e-06	0.000578661	#N/A
MSTRG.26595.1	Female	Male	-10.0261	0.320271	9.25638e-06	0.000663928	#N/A
MSTRG.37361.3	Female	Male	-10.0226	0.317458	1.40755e-05	0.000816865	#N/A
MSTRG.18989.1	Female	Male	-10.0211	0.315063	7.75024e-06	0.000589626	#N/A
MSTRG.21644.2	Female	Male	-10.0191	0.311747	8.92497e-06	0.000645348	#N/A
MSTRG.10751.2	Female	Male	-10.0157	0.310867	1.51338e-05	0.000852398	#N/A
MSTRG.4168.1	Female	Male	-10.0151	0.310084	1.26258e-05	0.000767708	#N/A
MSTRG.41390.1	Female	Male	-10.0132	0.307792	9.93772e-06	0.000689552	#N/A
MSTRG.43749.1	Female	Male	-10.0104	0.305691	1.43664e-05	0.000826685	#N/A
MSTRG.13634.1	Female	Male	-10.0084	0.302395	7.09996e-06	0.000560332	#N/A
MSTRG.11287.1	Female	Male	-10.0029	0.297243	7.50524e-06	0.000578661	#N/A
MSTRG.6867.1	Female	Male	-9.99818	0.293825	1.46714e-05	0.000838019	#N/A
MSTRG.46133.1	Female	Male	-9.99662	0.291348	8.31696e-06	0.000616376	#N/A
MSTRG.24478.1	Female	Male	-9.99185	0.28294	4.85918e-05	0.00197873	#N/A
MSTRG.3289.1	Female	Male	-9.98322	0.278689	1.0112e-05	0.000693682	#N/A
g4350.t1	Female	Male	-9.98189	0.278121	1.59034e-05	0.000884573	#N/A
MSTRG.25035.1	Female	Male	-9.97707	0.273639	1.82677e-05	0.000971638	#N/A
MSTRG.44098.1	Female	Male	-9.97304	0.2666	1.46906e-05	0.000838019	#N/A
MSTRG.17626.1	Female	Male	-9.97055	0.263358	2.53337e-05	0.00123356	#N/A
MSTRG.45865.1	Female	Male	-9.96967	0.265933	1.29992e-05	0.000774281	#N/A
g6464.t1	Female	Male	-9.96741	0.26029	2.61988e-05	0.00126521	#N/A
g4955.t1	Female	Male	-9.96398	0.260675	1.54867e-05	0.000866802	#N/A
MSTRG.38539.1	Female	Male	-9.96019	0.254428	1.30322e-05	0.000774281	#N/A
MSTRG.3335.1	Female	Male	-9.95749	0.253528	9.79648e-06	0.000684321	#N/A
MSTRG.34759.1	Female	Male	-9.9573	0.253626	1.11797e-05	0.000726874	#N/A
MSTRG.20062.1	Female	Male	-9.95595	0.253081	1.7649e-05	0.000950732	#N/A
MSTRG.31082.1	Female	Male	-9.95073	0.24758	1.35623e-05	0.000795715	#N/A
MSTRG.40200.7	Female	Male	-9.94782	2.67357	2.8907e-05	0.00135443	#N/A
g3927.t1	Female	Male	-9.9435	0.240663	1.45253e-05	0.000832143	#N/A
MSTRG.6073.1	Female	Male	-9.94303	0.238413	1.03472e-05	0.000700447	#N/A
MSTRG.3186.1	Female	Male	-9.94116	0.238314	1.38475e-05	0.000808897	#N/A
MSTRG.8135.1	Female	Male	-9.94023	0.235078	1.43702e-05	0.000826685	#N/A
MSTRG.16088.5	Female	Male	-9.93795	0.231614	3.15276e-05	0.00144428	#N/A
g14172.t1	Female	Male	-9.93615	0.232517	9.69047e-06	0.000680807	#N/A
MSTRG.8079.1	Female	Male	-9.93215	0.229852	1.67094e-05	0.000912332	#N/A
MSTRG.20346.1	Female	Male	-9.9257	0.223606	1.69983e-05	0.000922462	#N/A
MSTRG.15522.1	Female	Male	-9.91533	0.213304	1.49407e-05	0.000845593	#N/A
MSTRG.30493.1	Female	Male	-9.91346	0.209121	1.64563e-05	0.000905563	#N/A
MSTRG.34121.8	Female	Male	-9.9069	0.204176	1.09901e-05	0.000720661	#N/A
MSTRG.6679.1	Female	Male	-9.90519	0.202651	1.13822e-05	0.000728874	#N/A
g15760.t1	Female	Male	-9.90088	0.198836	1.26003e-05	0.000767708	#N/A
MSTRG.17792.3	Female	Male	-9.89617	0.191172	3.6491e-05	0.00160572	#N/A
MSTRG.33615.1	Female	Male	-9.89452	0.193628	2.04017e-05	0.00104565	#N/A
MSTRG.14977.1	Female	Male	-9.89433	0.18963	3.17424e-05	0.00144428	#N/A
MSTRG.40464.1	Female	Male	-9.89417	0.19097	1.40249e-05	0.000815701	#N/A
MSTRG.1951.1	Female	Male	-9.89057	0.189521	1.7697e-05	0.000950732	#N/A
MSTRG.4112.1	Female	Male	-9.89057	0.189521	1.7697e-05	0.000950732	#N/A
g12026.t1	Female	Male	-9.88658	0.185399	1.55621e-05	0.000869203	#N/A
MSTRG.24696.1	Female	Male	-9.87471	0.172624	1.32855e-05	0.000781188	#N/A
MSTRG.48221.5	Female	Male	-9.8719	0.168889	2.01722e-05	0.00103986	#N/A
MSTRG.33434.1	Female	Male	-9.86965	0.169378	1.96802e-05	0.0010204	#N/A
g6984.t1	Female	Male	-9.85839	0.155747	2.23028e-05	0.00112583	#N/A
MSTRG.30869.1	Female	Male	-9.85704	0.15709	1.9227e-05	0.00100913	#N/A
MSTRG.18773.1	Female	Male	-9.85679	0.15564	1.38252e-05	0.000808897	#N/A
g2456.t2	Female	Male	-9.828	0.128833	1.93231e-05	0.00100913	#N/A
MSTRG.45357.1	Female	Male	-9.82676	0.126488	1.60585e-05	0.000891349	#N/A
MSTRG.32528.2	Female	Male	-9.8234	0.124884	2.44496e-05	0.00121134	#N/A
MSTRG.24102.1	Female	Male	-9.8189	0.118954	1.67868e-05	0.00091469	#N/A
MSTRG.11041.1	Female	Male	-9.81315	0.114584	2.09822e-05	0.00107129	#N/A
MSTRG.15638.1	Female	Male	-9.80538	0.1068	1.95203e-05	0.00101604	#N/A
MSTRG.2251.1	Female	Male	-9.80535	0.104742	2.51019e-05	0.00122897	#N/A
MSTRG.43339.1	Female	Male	-9.80486	0.105373	1.77465e-05	0.000951485	#N/A
g16565.t1	Female	Male	-9.79859	0.0995517	1.80498e-05	0.000961961	#N/A
g2500.t1	Female	Male	-9.792	0.0941511	2.24543e-05	0.00113134	#N/A
MSTRG.43716.1	Female	Male	-9.79176	0.0905465	4.51353e-05	0.00188975	#N/A
MSTRG.30468.1	Female	Male	-9.78919	0.0917421	2.53591e-05	0.00123356	#N/A
MSTRG.40500.1	Female	Male	-9.77745	0.0783901	2.28645e-05	0.00114554	#N/A
MSTRG.1253.1	Female	Male	-9.77067	0.073181	2.17097e-05	0.00110162	#N/A
MSTRG.13982.3	Female	Male	-9.76543	0.0675805	2.11539e-05	0.001078	#N/A
MSTRG.26947.1	Female	Male	-9.7618	0.0640744	2.13488e-05	0.00108587	#N/A
MSTRG.35170.1	Female	Male	-9.75886	0.0618744	2.29346e-05	0.0011469	#N/A
MSTRG.2691.1	Female	Male	-9.75747	0.0592398	2.43589e-05	0.00120909	#N/A
g9163.t1	Female	Male	-9.75017	0.0521675	2.54058e-05	0.00123359	#N/A
MSTRG.4185.1	Female	Male	-9.74777	0.051559	2.67698e-05	0.00127893	#N/A
MSTRG.44564.3	Female	Male	-9.74218	0.0420715	7.44004e-05	0.00276789	#N/A
MSTRG.40408.1	Female	Male	-9.74079	0.0436763	2.3787e-05	0.00118586	#N/A
g6785.t1	Female	Male	-9.73973	0.0431187	2.38023e-05	0.00118586	#N/A
MSTRG.32956.1	Female	Male	-9.7364	0.0387423	2.80342e-05	0.00132513	#N/A
MSTRG.26045.1	Female	Male	-9.73464	0.0368147	3.08686e-05	0.00142145	#N/A
g2249.t2	Female	Male	-9.734	0.0381748	2.72362e-05	0.00129658	#N/A
MSTRG.37043.1	Female	Male	-9.73042	0.034327	2.51729e-05	0.00122897	#N/A
MSTRG.24056.1	Female	Male	-9.72125	0.0226555	5.51913e-05	0.00219078	#N/A
MSTRG.4138.1	Female	Male	-9.71897	0.0241119	3.22406e-05	0.00146197	#N/A
MSTRG.45658.1	Female	Male	-9.7126	0.0174312	2.82493e-05	0.00132826	#N/A
MSTRG.49730.1	Female	Male	-9.71246	0.0177224	3.17306e-05	0.00144428	#N/A
MSTRG.7002.1	Female	Male	-9.71014	0.0137531	2.92553e-05	0.00136358	#N/A
g7960.t1	Female	Male	-9.70344	0.00759306	2.81973e-05	0.00132815	#N/A
MSTRG.5539.1	Female	Male	-9.70031	0.00568532	3.03791e-05	0.00140373	#N/A
MSTRG.17967.1	Female	Male	-9.70031	0.00568532	3.03791e-05	0.00140373	#N/A
MSTRG.41449.1	Female	Male	-9.69565	0.000881988	2.89644e-05	0.00135474	#N/A
MSTRG.18995.1	Female	Male	-9.68876	-0.00499839	3.53371e-05	0.00156784	#N/A
MSTRG.13361.1	Female	Male	-9.68776	-0.00583906	3.67488e-05	0.00160913	#N/A
MSTRG.37135.1	Female	Male	-9.6821	-0.0115272	3.49343e-05	0.00156536	#N/A
MSTRG.15612.1	Female	Male	-9.67471	-0.0224407	7.38147e-05	0.00275047	#N/A
MSTRG.47928.1	Female	Male	-9.66522	-0.0297829	3.8178e-05	0.00165814	#N/A
MSTRG.34284.4	Female	Male	-9.66201	-0.0316567	3.25583e-05	0.0014714	#N/A
MSTRG.28003.3	Female	Male	-9.66078	-0.0318221	3.99793e-05	0.00171962	#N/A
g15148.t1	Female	Male	-9.65266	-0.0423131	4.65598e-05	0.00192827	#N/A
MSTRG.24863.1	Female	Male	-9.65211	-0.0438881	7.01445e-05	0.00263945	#N/A
MSTRG.43245.1	Female	Male	-9.64131	-0.0510427	3.73557e-05	0.00163037	#N/A
MSTRG.7089.2	Female	Male	-9.64003	-0.0549732	5.84121e-05	0.0022764	#N/A
MSTRG.37715.1	Female	Male	-9.63264	-0.0606535	3.89089e-05	0.0016817	#N/A
MSTRG.2258.1	Female	Male	-9.62496	-0.0691198	5.44632e-05	0.00217155	#N/A
MSTRG.32403.1	Female	Male	-9.61537	-0.0757709	4.20362e-05	0.00179082	#N/A
MSTRG.24465.1	Female	Male	-9.61032	-0.0805125	4.4035e-05	0.00185822	#N/A
MSTRG.33357.1	Female	Male	-9.61032	-0.0805125	4.4035e-05	0.00185822	#N/A
g6398.t3	Female	Male	-9.59995	-0.0938096	7.59004e-05	0.00280088	#N/A
g13857.t1	Female	Male	-9.5985	-0.0938552	4.85156e-05	0.00197873	#N/A
g6178.t1	Female	Male	-9.59399	-0.099942	9.11556e-05	0.00319525	#N/A
MSTRG.32404.1	Female	Male	-9.58696	-0.103099	4.53427e-05	0.00189251	#N/A
g9951.t2	Female	Male	-9.58424	-0.107895	5.69004e-05	0.00224054	#N/A
MSTRG.2816.1	Female	Male	-9.57769	-0.111888	4.75474e-05	0.00195404	#N/A
MSTRG.25102.1	Female	Male	-9.57356	-0.115859	4.85226e-05	0.00197873	#N/A
MSTRG.47236.2	Female	Male	-9.57234	-0.120762	9.76276e-05	0.00335293	#N/A
MSTRG.13042.1	Female	Male	-9.56432	-0.125632	4.70113e-05	0.00193797	#N/A
g1299.t1	Female	Male	-9.55909	-0.13054	4.72719e-05	0.00194571	#N/A
MSTRG.41415.1	Female	Male	-9.55165	-0.136778	5.238e-05	0.00209787	#N/A
MSTRG.40928.1	Female	Male	-9.55083	-0.13956	5.70241e-05	0.00224054	#N/A
MSTRG.36905.1	Female	Male	-9.53479	-0.153505	5.19861e-05	0.00209148	#N/A
MSTRG.7979.1	Female	Male	-9.53479	-0.153505	5.19861e-05	0.00209148	#N/A
MSTRG.16826.1	Female	Male	-9.53172	-0.157694	5.84544e-05	0.0022764	#N/A
MSTRG.33547.1	Female	Male	-9.5155	-0.171764	5.6186e-05	0.00222696	#N/A
MSTRG.41418.1	Female	Male	-9.50904	-0.17825	5.68842e-05	0.00224054	#N/A
MSTRG.35994.1	Female	Male	-9.49822	-0.189504	6.31033e-05	0.00242219	#N/A
MSTRG.29649.6	Female	Male	-9.48203	-0.206626	0.000101354	0.00343874	#N/A
MSTRG.43694.1	Female	Male	-9.45834	-0.227232	6.87778e-05	0.00259725	#N/A
MSTRG.27889.2	Female	Male	-9.45834	-0.227232	6.87778e-05	0.00259725	#N/A
MSTRG.39856.1	Female	Male	-9.44481	-0.239606	7.12737e-05	0.00266829	#N/A
MSTRG.47030.1	Female	Male	-9.42886	-0.255216	7.51454e-05	0.00278069	#N/A
MSTRG.28305.1	Female	Male	-9.41621	-0.268186	8.91698e-05	0.00313901	#N/A
g14799.t1	Female	Male	-9.41273	-0.27102	8.30047e-05	0.00299287	#N/A
MSTRG.30349.1	Female	Male	-9.40694	-0.275744	8.12312e-05	0.00296085	#N/A
MSTRG.17544.1	Female	Male	-9.4046	-0.278314	8.22272e-05	0.00297797	#N/A
MSTRG.8775.3	Female	Male	-9.39761	-0.284686	8.39256e-05	0.00301794	#N/A
MSTRG.47546.1	Female	Male	-9.39178	-0.292239	0.000112743	0.00371468	#N/A
MSTRG.28951.2	Female	Male	-9.37883	-0.304919	0.000126642	0.00403836	#N/A
g13588.t2	Female	Male	-9.37636	-0.305379	9.16317e-05	0.00319525	#N/A
MSTRG.18674.1	Female	Male	-9.37518	-0.306336	9.08422e-05	0.00318949	#N/A
MSTRG.45255.1	Female	Male	-9.37516	-0.307066	9.75154e-05	0.00335293	#N/A
MSTRG.30489.1	Female	Male	-9.37384	10.9787	3.95729e-06	0.000435968	#N/A
MSTRG.15597.1	Female	Male	-9.37039	-0.311638	9.86696e-05	0.00338004	#N/A
MSTRG.9248.1	Female	Male	-9.36682	-0.314518	9.51097e-05	0.00328865	#N/A
MSTRG.6260.1	Female	Male	-9.35359	-0.327375	0.000101412	0.00343874	#N/A
MSTRG.24792.1	Female	Male	-9.33908	-0.340538	0.00010082	0.00342736	#N/A
MSTRG.2172.1	Female	Male	-9.33419	-0.345212	0.000103555	0.00349676	#N/A
MSTRG.2047.1	Female	Male	-9.31442	-0.365743	0.000138387	0.00432019	#N/A
MSTRG.32236.1	Female	Male	-9.31319	-0.365882	0.000116919	0.00381005	#N/A
MSTRG.23714.1	Female	Male	-9.30194	-0.377272	0.000134423	0.004236	#N/A
MSTRG.41540.1	Female	Male	-9.25874	-0.418214	0.000151194	0.00462291	#N/A
MSTRG.2286.1	Female	Male	-9.25492	-0.421209	0.000139556	0.00434226	#N/A
MSTRG.46071.1	Female	Male	-9.24453	-0.431136	0.000145523	0.00448803	#N/A
MSTRG.32216.1	Female	Male	-9.24325	-0.432138	0.000142721	0.00441429	#N/A
MSTRG.47198.1	Female	Male	-9.24317	-0.433115	0.000160683	0.00484657	#N/A
MSTRG.24543.1	Female	Male	-9.2288	-0.44616	0.000156677	0.00475794	#N/A
MSTRG.37808.1	Female	Male	-9.19276	-0.480842	0.000187314	0.00544717	#N/A
MSTRG.6077.1	Female	Male	-9.01592	2.57966	4.54231e-06	0.000471752	#N/A
MSTRG.22152.1	Female	Male	-8.8875	1.65482	2.78035e-06	0.000373797	#N/A
MSTRG.43296.1	Female	Male	-8.65193	1.72379	3.7669e-06	0.000430682	#N/A
MSTRG.43629.2	Female	Male	-8.64535	1.42003	2.36894e-06	0.000353604	#N/A
MSTRG.33841.4	Female	Male	-8.61537	9.83388	0.00283749	0.0358763	#N/A
g367.t1	Female	Male	-8.60254	1.37425	5.15407e-06	0.000483832	#N/A
MSTRG.19929.2	Female	Male	-8.51127	2.61856	9.69528e-06	0.000680807	#N/A
MSTRG.48533.1	Female	Male	-8.49759	1.27915	1.37656e-06	0.00027484	#N/A
MSTRG.25720.1	Female	Male	-8.49241	1.26806	4.5833e-06	0.000471752	#N/A
MSTRG.8839.3	Female	Male	-8.4233	1.19125	2.28508e-05	0.00114554	#N/A
MSTRG.4799.1	Female	Male	-8.42074	1.5061	1.05853e-05	0.000707999	#N/A
g14396.t1	Female	Male	-8.3837	1.1612	6.04129e-06	0.000513107	#N/A
MSTRG.17961.1	Female	Male	-8.35209	1.1219	2.45873e-05	0.00121367	#N/A
MSTRG.17019.1	Female	Male	-8.31397	1.09323	6.59943e-06	0.000538024	#N/A
MSTRG.41059.2	Female	Male	-8.29948	1.08108	4.69626e-06	0.000477207	#N/A
g11928.t1	Female	Male	-8.23562	1.01343	1.31531e-05	0.000775105	#N/A
MSTRG.33351.1	Female	Male	-8.2254	0.997529	3.30482e-05	0.00148851	#N/A
MSTRG.33653.1	Female	Male	-8.21188	1.3289	6.19053e-05	0.00239187	#N/A
MSTRG.37692.1	Female	Male	-8.17929	0.962817	5.21874e-06	0.000486488	#N/A
MSTRG.7757.3	Female	Male	-8.13285	1.70571	2.48242e-05	0.00122282	#N/A
MSTRG.30501.3	Female	Male	-8.12978	3.03347	0.000151054	0.00462291	#N/A
MSTRG.3081.1	Female	Male	-8.10445	1.22938	9.46588e-05	0.00328044	#N/A
MSTRG.13432.4	Female	Male	-8.10277	1.66393	8.4814e-05	0.00302549	#N/A
MSTRG.2273.1	Female	Male	-8.09902	0.88759	4.52247e-06	0.000471752	#N/A
MSTRG.34238.3	Female	Male	-8.08453	1.22241	0.000162582	0.00487635	#N/A
MSTRG.49435.1	Female	Male	-8.05693	1.63164	2.65325e-05	0.00127282	#N/A
MSTRG.29253.6	Female	Male	-8.0535	4.83868	0.00103941	0.0186384	#N/A
MSTRG.26925.1	Female	Male	-8.02367	1.61722	3.1928e-06	0.000406573	#N/A
MSTRG.40381.1	Female	Male	-7.94737	2.3707	1.42965e-05	0.000826111	#N/A
MSTRG.28282.1	Female	Male	-7.86591	1.45746	8.37532e-06	0.000617282	#N/A
MSTRG.8689.3	Female	Male	-7.85175	0.935924	1.64243e-05	0.000905563	#N/A
MSTRG.25462.1	Female	Male	-7.83479	1.42293	1.42508e-05	0.000825249	#N/A
MSTRG.12503.2	Female	Male	-7.82992	2.65114	0.000837659	0.0160923	#N/A
MSTRG.10798.1	Female	Male	-7.7872	2.88606	0.000295943	0.00763515	#N/A
MSTRG.26853.1	Female	Male	-7.77267	1.84869	1.03737e-05	0.000700447	#N/A
MSTRG.13495.1	Female	Male	-7.76931	1.36836	5.01844e-06	0.000483832	#N/A
MSTRG.14437.1	Female	Male	-7.76915	0.889045	9.55679e-05	0.0032958	#N/A
MSTRG.41432.1	Female	Male	-7.74441	1.58554	1.53112e-05	0.000858776	#N/A
MSTRG.2283.1	Female	Male	-7.73291	1.8058	1.6209e-05	0.000895981	#N/A
MSTRG.28692.1	Female	Male	-7.72783	0.85164	0.000115551	0.00379318	#N/A
MSTRG.39178.1	Female	Male	-7.72665	0.827303	4.13023e-05	0.001768	#N/A
MSTRG.2158.2	Female	Male	-7.71011	1.29443	3.57467e-05	0.00158077	#N/A
MSTRG.42100.3	Female	Male	-7.69977	0.497253	1.52212e-05	0.000855519	#N/A
g7329.t1	Female	Male	-7.65974	1.24537	3.81383e-05	0.00165814	#N/A
MSTRG.26923.2	Female	Male	-7.65857	1.74655	4.18458e-06	0.000447817	#N/A
MSTRG.49559.1	Female	Male	-7.63153	1.22912	1.14286e-05	0.000728874	#N/A
MSTRG.20673.5	Female	Male	-7.61594	2.31521	5.18105e-05	0.00209071	#N/A
MSTRG.6526.1	Female	Male	-7.57545	0.695279	0.000106577	0.00354647	#N/A
MSTRG.49476.1	Female	Male	-7.5555	0.664204	6.64836e-05	0.00253376	#N/A
MSTRG.9484.1	Female	Male	-7.51915	0.321312	2.657e-05	0.00127282	#N/A
MSTRG.16865.3	Female	Male	-7.48745	0.28513	4.61865e-05	0.00191875	#N/A
MSTRG.2229.1	Female	Male	-7.48178	0.588073	6.21978e-05	0.00239503	#N/A
MSTRG.33208.1	Female	Male	-7.4724	0.577138	5.82425e-05	0.0022764	#N/A
MSTRG.21299.1	Female	Male	-7.47094	0.274098	2.79319e-05	0.00132264	#N/A
MSTRG.17960.1	Female	Male	-7.46536	3.34147	0.00113438	0.0198491	#N/A
MSTRG.2525.1	Female	Male	-7.46201	0.564122	5.63315e-05	0.00222943	#N/A
MSTRG.7991.2	Female	Male	-7.46162	1.98144	2.809e-05	0.00132543	#N/A
g7473.t1	Female	Male	-7.41274	0.215381	5.71493e-05	0.0022419	#N/A
MSTRG.20512.2	Female	Male	-7.4075	1.00973	1.9262e-05	0.00100913	#N/A
MSTRG.4128.1	Female	Male	-7.40017	1.49395	6.36086e-06	0.000525242	#N/A
MSTRG.40844.5	Female	Male	-7.38773	1.69236	4.55376e-05	0.00189482	#N/A
MSTRG.16950.1	Female	Male	-7.38627	0.996012	8.46108e-06	0.00062189	#N/A
MSTRG.8672.2	Female	Male	-7.38578	0.190599	4.8589e-05	0.00197873	#N/A
MSTRG.44178.1	Female	Male	-7.37975	0.184942	4.78772e-05	0.00196458	#N/A
MSTRG.38732.2	Female	Male	-7.37186	1.44617	4.90076e-05	0.00199263	#N/A
MSTRG.48153.1	Female	Male	-7.34871	0.155336	4.52957e-05	0.00189251	#N/A
MSTRG.46099.1	Female	Male	-7.33483	1.46056	8.52021e-05	0.00303528	#N/A
MSTRG.27050.1	Female	Male	-7.32563	0.131092	7.11486e-05	0.00266829	#N/A
g4829.t1	Female	Male	-7.32075	0.127967	5.13385e-05	0.00207479	#N/A
MSTRG.41236.1	Female	Male	-7.31865	2.08952	0.000169358	0.00504003	#N/A
MSTRG.10580.1	Female	Male	-7.28947	0.0962049	6.24486e-05	0.0024005	#N/A
MSTRG.2210.1	Female	Male	-7.28631	0.395314	8.15781e-05	0.00296541	#N/A
MSTRG.42287.1	Female	Male	-7.26214	0.0696562	8.40522e-05	0.00301817	#N/A
MSTRG.17484.2	Female	Male	-7.25161	3.4471	0.000472705	0.0108123	#N/A
MSTRG.1161.1	Female	Male	-7.25138	3.66491	0.00212821	0.0293716	#N/A
MSTRG.48689.3	Female	Male	-7.24691	0.0453792	0.00017184	0.00510696	#N/A
MSTRG.44820.1	Female	Male	-7.24401	0.0521066	8.80132e-05	0.00311057	#N/A
MSTRG.3639.1	Female	Male	-7.23911	1.91395	0.00084199	0.0161481	#N/A
MSTRG.16866.1	Female	Male	-7.23528	2.46597	0.000336754	0.00842798	#N/A
MSTRG.42243.2	Female	Male	-7.223	0.834117	1.7336e-05	0.000938879	#N/A
MSTRG.35198.2	Female	Male	-7.21606	1.30667	1.92417e-05	0.00100913	#N/A
MSTRG.18796.1	Female	Male	-7.21454	0.813668	6.66769e-05	0.00253752	#N/A
g11977.t1	Female	Male	-7.20654	0.343281	0.000293439	0.00759231	#N/A
MSTRG.34238.2	Female	Male	-7.20163	2.03433	7.44891e-05	0.00276789	#N/A
MSTRG.38861.1	Female	Male	-7.19492	1.32665	0.000120904	0.00389251	#N/A
g2487.t1	Female	Male	-7.19262	0.320701	0.000176864	0.00520553	#N/A
MSTRG.5983.1	Female	Male	-7.19219	2.01207	0.00135723	0.0220996	#N/A
MSTRG.49698.1	Female	Male	-7.18822	0.789715	5.94078e-05	0.00230681	#N/A
MSTRG.34873.5	Female	Male	-7.18736	1.26275	8.57649e-05	0.00304722	#N/A
MSTRG.20520.1	Female	Male	-7.18356	0.793383	2.48641e-05	0.00122282	#N/A
g6283.t1	Female	Male	-7.18286	0.794643	1.79483e-05	0.000958462	#N/A
MSTRG.43319.1	Female	Male	-7.18185	1.32832	0.000205813	0.00582064	#N/A
MSTRG.20102.3	Female	Male	-7.17275	3.52533	0.00073415	0.0146797	#N/A
g73.t1	Female	Male	-7.15954	1.24385	4.38658e-05	0.00185694	#N/A
MSTRG.672.1	Female	Male	-7.15765	0.755409	9.91267e-05	0.00339135	#N/A
MSTRG.22829.1	Female	Male	-7.15168	1.95186	0.000654639	0.013486	#N/A
MSTRG.14499.3	Female	Male	-7.14764	-0.043406	0.000124602	0.00399232	#N/A
MSTRG.6492.1	Female	Male	-7.13075	0.74314	2.45012e-05	0.00121165	#N/A
MSTRG.2281.1	Female	Male	-7.12068	0.725107	6.11688e-05	0.00236832	#N/A
MSTRG.42846.2	Female	Male	-7.11885	0.732881	2.17409e-05	0.00110162	#N/A
MSTRG.30131.3	Female	Male	-7.11837	0.722326	6.51127e-05	0.00249217	#N/A
g9167.t2	Female	Male	-7.11484	0.727808	2.5173e-05	0.00122897	#N/A
MSTRG.16810.1	Female	Male	-7.1135	2.40976	2.091e-05	0.00106965	#N/A
MSTRG.14125.2	Female	Male	-7.10409	4.78711	0.000378604	0.00908445	#N/A
MSTRG.35510.1	Female	Male	-7.09828	1.19074	2.63082e-05	0.00126591	#N/A
MSTRG.32387.1	Female	Male	-7.09472	0.70659	3.16767e-05	0.00144428	#N/A
g13384.t1	Female	Male	-7.09353	0.230269	0.000253645	0.00680645	#N/A
MSTRG.30520.3	Female	Male	-7.09186	2.65544	0.00144558	0.0230381	#N/A
g16320.t1	Female	Male	-7.08715	1.87857	0.00045034	0.0104135	#N/A
g1283.t2	Female	Male	-7.08638	1.50543	0.000256194	0.00686109	#N/A
MSTRG.24782.1	Female	Male	-7.08352	0.685303	9.55946e-05	0.0032958	#N/A
g9781.t1	Female	Male	-7.07035	2.16897	0.00139205	0.0224623	#N/A
MSTRG.49711.1	Female	Male	-7.05725	1.99533	0.000129151	0.00411345	#N/A
MSTRG.40200.10	Female	Male	-7.05245	1.75946	0.00011651	0.00380598	#N/A
MSTRG.30576.2	Female	Male	-7.03826	5.19988	0.00215127	0.0295609	#N/A
MSTRG.24409.1	Female	Male	-7.0365	1.17772	0.000194127	0.00560267	#N/A
MSTRG.34108.1	Female	Male	-7.03241	3.38979	0.000624679	0.0130874	#N/A
g244.t1	Female	Male	-7.02783	1.82722	0.000628347	0.0131232	#N/A
MSTRG.3544.1	Female	Male	-7.02725	1.12676	1.78578e-05	0.000955534	#N/A
MSTRG.2290.1	Female	Male	-7.02707	3.1388	0.00185329	0.0268888	#N/A
MSTRG.9203.1	Female	Male	-7.02538	0.631729	8.15515e-05	0.00296541	#N/A
MSTRG.24687.3	Female	Male	-7.00633	1.45308	3.1833e-05	0.00144594	#N/A
g14517.t1	Female	Male	-7.0058	1.11093	1.08313e-05	0.000719058	#N/A
MSTRG.13234.1	Female	Male	-6.98648	1.42922	5.45596e-05	0.00217215	#N/A
MSTRG.33808.1	Female	Male	-6.98035	1.4274	3.82989e-05	0.0016607	#N/A
MSTRG.1275.1	Female	Male	-6.97108	-0.213228	0.000212089	0.00594783	#N/A
MSTRG.38544.1	Female	Male	-6.9577	0.10722	0.000493645	0.0112304	#N/A
MSTRG.24438.1	Female	Male	-6.95073	1.73239	0.000351529	0.00862747	#N/A
MSTRG.24510.1	Female	Male	-6.94785	0.091269	0.000383929	0.0091711	#N/A
MSTRG.49353.1	Female	Male	-6.93962	1.10373	0.000441781	0.010251	#N/A
MSTRG.49971.3	Female	Male	-6.93294	1.38775	2.21372e-05	0.00111958	#N/A
MSTRG.32472.1	Female	Male	-6.93024	0.0757819	0.000366549	0.00885876	#N/A
MSTRG.30636.1	Female	Male	-6.89547	0.0384343	0.000343625	0.00854399	#N/A
MSTRG.6427.1	Female	Male	-6.8916	0.0348599	0.000350313	0.00862747	#N/A
MSTRG.5656.11	Female	Male	-6.88749	1.41625	7.13101e-05	0.00266829	#N/A
MSTRG.39112.1	Female	Male	-6.87415	1.71719	0.00305977	0.0377189	#N/A
MSTRG.46962.1	Female	Male	-6.8679	1.58482	0.000114958	0.00378191	#N/A
g12338.t1	Female	Male	-6.86619	0.017058	0.000508761	0.011467	#N/A
MSTRG.1248.1	Female	Male	-6.85914	1.02973	0.000569892	0.0122367	#N/A
MSTRG.43458.2	Female	Male	-6.85727	1.67728	1.19218e-05	0.00074697	#N/A
MSTRG.2245.1	Female	Male	-6.8572	0.473412	7.21697e-05	0.00269669	#N/A
MSTRG.6344.1	Female	Male	-6.85604	2.45931	0.00156396	0.0242283	#N/A
g5850.t1	Female	Male	-6.84857	1.01769	0.000548222	0.0120009	#N/A
MSTRG.43639.1	Female	Male	-6.84615	1.15881	2.02328e-05	0.00104098	#N/A
MSTRG.9244.1	Female	Male	-6.83406	1.00722	0.000626227	0.0130994	#N/A
g4104.t1	Female	Male	-6.82829	1.35024	4.55396e-05	0.00189482	#N/A
MSTRG.3952.1	Female	Male	-6.81826	0.926826	1.87714e-05	0.000994473	#N/A
MSTRG.14098.4	Female	Male	-6.81357	1.53709	8.0568e-05	0.00294068	#N/A
MSTRG.27510.1	Female	Male	-6.81214	0.95699	0.00026179	0.00696215	#N/A
MSTRG.14723.1	Female	Male	-6.80369	1.53244	5.20719e-05	0.00209179	#N/A
MSTRG.45171.1	Female	Male	-6.80362	1.60416	0.000758303	0.0150168	#N/A
MSTRG.16870.1	Female	Male	-6.80256	1.58541	0.000424357	0.00993285	#N/A
MSTRG.15600.1	Female	Male	-6.78294	0.950145	0.000538974	0.0118876	#N/A
MSTRG.6556.1	Female	Male	-6.78025	2.06816	0.000897639	0.0168352	#N/A
MSTRG.36279.1	Female	Male	-6.77825	0.396472	9.14961e-05	0.00319525	#N/A
MSTRG.6560.1	Female	Male	-6.76673	0.858159	0.000115726	0.00379427	#N/A
MSTRG.4314.1	Female	Male	-6.76579	0.386699	7.35112e-05	0.00274298	#N/A
MSTRG.21455.2	Female	Male	-6.76564	0.381866	0.000119073	0.00383818	#N/A
MSTRG.2853.1	Female	Male	-6.76131	1.99599	6.55704e-05	0.0025061	#N/A
MSTRG.29453.4	Female	Male	-6.73402	1.68758	0.000100082	0.00341529	#N/A
MSTRG.12505.1	Female	Male	-6.72865	1.27133	0.000181907	0.00531884	#N/A
MSTRG.50612.1	Female	Male	-6.72732	0.349187	8.26235e-05	0.00298717	#N/A
MSTRG.6868.1	Female	Male	-6.72426	0.831598	3.39223e-05	0.00152531	#N/A
MSTRG.11053.1	Female	Male	-6.71873	0.816597	8.22576e-05	0.00297797	#N/A
MSTRG.21762.1	Female	Male	-6.69035	1.00642	1.91615e-05	0.00100913	#N/A
MSTRG.35802.1	Female	Male	-6.68975	2.28763	0.00128738	0.0213634	#N/A
MSTRG.18860.1	Female	Male	-6.68764	0.828231	0.000253603	0.00680645	#N/A
MSTRG.49192.1	Female	Male	-6.68366	1.20131	3.54187e-05	0.00156886	#N/A
g1001.t1	Female	Male	-6.68296	1.52196	0.00287026	0.036205	#N/A
MSTRG.39045.1	Female	Male	-6.67851	0.298241	0.000137562	0.00430447	#N/A
MSTRG.7962.4	Female	Male	-6.6747	1.48036	0.000970648	0.0177868	#N/A
MSTRG.9486.1	Female	Male	-6.66923	2.26873	0.00139751	0.0225165	#N/A
MSTRG.34235.1	Female	Male	-6.66742	3.05721	0.00137657	0.0222799	#N/A
MSTRG.20803.1	Female	Male	-6.65895	0.760245	8.02944e-05	0.00293469	#N/A
MSTRG.441.5	Female	Male	-6.65342	1.46061	0.00115826	0.02007	#N/A
MSTRG.5850.1	Female	Male	-6.64653	1.09765	0.000100683	0.00342708	#N/A
g7518.t1	Female	Male	-6.64625	0.790087	0.000288446	0.00750425	#N/A
MSTRG.32342.1	Female	Male	-6.64509	1.18952	0.000203559	0.00578747	#N/A
MSTRG.50467.1	Female	Male	-6.64217	2.08273	0.00107616	0.0191052	#N/A
MSTRG.41067.1	Female	Male	-6.64097	0.741232	9.51413e-05	0.00328865	#N/A
MSTRG.33872.1	Female	Male	-6.63618	2.75299	0.0030275	0.0375349	#N/A
MSTRG.2337.1	Female	Male	-6.62651	1.46884	0.000151438	0.00462509	#N/A
MSTRG.4645.1	Female	Male	-6.62137	-0.212362	0.000813731	0.0157529	#N/A
MSTRG.15547.1	Female	Male	-6.61804	1.26806	2.62927e-05	0.00126591	#N/A
MSTRG.16491.1	Female	Male	-6.61784	0.238417	0.000177678	0.00521799	#N/A
MSTRG.3579.1	Female	Male	-6.61548	1.44187	0.00196474	0.0278916	#N/A
g3619.t1	Female	Male	-6.60966	0.470186	4.18717e-05	0.00178666	#N/A
MSTRG.7746.1	Female	Male	-6.60749	0.717459	4.67596e-05	0.00193057	#N/A
MSTRG.43655.1	Female	Male	-6.58865	-0.238842	0.00102379	0.0184255	#N/A
MSTRG.26021.1	Female	Male	-6.58782	0.696098	5.99665e-05	0.00232514	#N/A
MSTRG.24246.1	Female	Male	-6.57597	0.739057	0.000545255	0.011967	#N/A
MSTRG.17163.1	Female	Male	-6.57161	1.28665	0.000362656	0.00880444	#N/A
MSTRG.1068.1	Female	Male	-6.56195	1.27285	0.000501787	0.011346	#N/A
MSTRG.8519.1	Female	Male	-6.55828	0.183899	0.000136955	0.00429051	#N/A
MSTRG.3277.1	Female	Male	-6.55591	0.179102	0.000196365	0.00564279	#N/A
MSTRG.3237.1	Female	Male	-6.55107	1.00886	8.55537e-05	0.00304376	#N/A
MSTRG.3500.1	Female	Male	-6.5476	1.95546	1.47645e-05	0.000839171	#N/A
g14317.t1	Female	Male	-6.54576	0.660383	3.77809e-05	0.00164624	#N/A
MSTRG.3947.1	Female	Male	-6.54431	1.85981	0.000208971	0.00589749	#N/A
MSTRG.8439.1	Female	Male	-6.54398	0.725024	0.000929702	0.0172611	#N/A
MSTRG.37026.1	Female	Male	-6.53169	0.154759	0.000226437	0.00626483	#N/A
g8455.t1	Female	Male	-6.52148	0.636598	4.38415e-05	0.00185694	#N/A
MSTRG.2566.1	Female	Male	-6.51935	1.05184	9.81537e-05	0.00336667	#N/A
MSTRG.48625.5	Female	Male	-6.50818	1.8205	0.000281278	0.00734893	#N/A
MSTRG.12501.1	Female	Male	-6.49067	1.22851	8.38576e-05	0.00301794	#N/A
MSTRG.48454.1	Female	Male	-6.49042	0.606973	4.47786e-05	0.00188346	#N/A
MSTRG.41580.1	Female	Male	-6.48245	0.640896	0.000505109	0.011404	#N/A
MSTRG.2851.1	Female	Male	-6.48101	2.32096	0.000115066	0.00378191	#N/A
MSTRG.49550.8	Female	Male	-6.48096	0.107019	0.000228129	0.00629168	#N/A
MSTRG.28468.1	Female	Male	-6.47794	1.29062	0.0013501	0.0220836	#N/A
MSTRG.252.1	Female	Male	-6.47575	2.55318	0.000335419	0.00841016	#N/A
MSTRG.37229.1	Female	Male	-6.47525	0.652227	0.000860706	0.0164363	#N/A
MSTRG.6305.2	Female	Male	-6.47329	0.343475	9.15449e-05	0.00319525	#N/A
MSTRG.26348.3	Female	Male	-6.47049	1.12491	2.54974e-05	0.00123579	#N/A
MSTRG.13718.1	Female	Male	-6.4704	1.58647	0.00141282	0.022715	#N/A
MSTRG.23186.1	Female	Male	-6.4698	1.11729	0.000211372	0.00593393	#N/A
MSTRG.37552.2	Female	Male	-6.46739	1.73036	0.00195568	0.0278162	#N/A
MSTRG.46918.1	Female	Male	-6.46738	0.339929	0.000116421	0.00380598	#N/A
MSTRG.41653.1	Female	Male	-6.46397	1.1857	0.000328355	0.00830323	#N/A
MSTRG.40889.1	Female	Male	-6.46083	0.636511	0.000835692	0.0160734	#N/A
MSTRG.47672.1	Female	Male	-6.46017	-0.359278	0.00123657	0.0208332	#N/A
MSTRG.11057.1	Female	Male	-6.45984	1.37402	3.23817e-05	0.00146589	#N/A
MSTRG.41276.1	Female	Male	-6.45641	0.633559	0.000868351	0.0165351	#N/A
MSTRG.30280.3	Female	Male	-6.45597	3.02406	0.0039689	0.0448033	#N/A
MSTRG.262.1	Female	Male	-6.45088	2.0459	0.00121791	0.020649	#N/A
MSTRG.9743.1	Female	Male	-6.44912	1.26387	0.00145864	0.0231875	#N/A
MSTRG.24706.1	Female	Male	-6.44851	1.25015	0.00096455	0.0177063	#N/A
MSTRG.44175.1	Female	Male	-6.44613	0.0674371	0.000318466	0.00810679	#N/A
g12942.t1	Female	Male	-6.44373	0.907288	8.43999e-05	0.00301876	#N/A
MSTRG.213.1	Female	Male	-6.4416	0.598206	0.000491213	0.0112037	#N/A
MSTRG.22695.1	Female	Male	-6.44033	1.75765	1.29673e-05	0.000774281	#N/A
MSTRG.25528.1	Female	Male	-6.44008	0.896491	0.000153007	0.00466767	#N/A
MSTRG.5671.1	Female	Male	-6.42731	0.535375	0.0001338	0.00423129	#N/A
MSTRG.39126.1	Female	Male	-6.42544	1.47291	0.000577627	0.012373	#N/A
MSTRG.1279.2	Female	Male	-6.40263	0.275653	0.000106338	0.00354291	#N/A
MSTRG.46956.1	Female	Male	-6.4009	-0.412342	0.0014823	0.0233004	#N/A
MSTRG.37550.1	Female	Male	-6.39857	2.01032	0.00262978	0.0340054	#N/A
MSTRG.20609.1	Female	Male	-6.39813	0.569374	0.000764388	0.0151261	#N/A
MSTRG.44334.2	Female	Male	-6.39008	1.35447	0.000145608	0.00448803	#N/A
g4267.t1	Female	Male	-6.3894	0.0177464	0.000313259	0.00799707	#N/A
g11277.t1	Female	Male	-6.38624	0.83934	0.000247554	0.00666974	#N/A
MSTRG.49897.1	Female	Male	-6.38581	2.07751	0.00399985	0.0450577	#N/A
MSTRG.38529.1	Female	Male	-6.38056	3.36647	1.49497e-05	0.000845593	#N/A
MSTRG.4164.1	Female	Male	-6.37857	1.10887	0.00024155	0.00657001	#N/A
MSTRG.11732.1	Female	Male	-6.37818	1.83713	0.000737391	0.0147335	#N/A
MSTRG.37535.1	Female	Male	-6.35939	-0.0104522	0.000292634	0.00757901	#N/A
MSTRG.16517.2	Female	Male	-6.3551	0.823262	7.86549e-05	0.00288265	#N/A
MSTRG.13729.1	Female	Male	-6.34877	1.29747	0.000564933	0.0121907	#N/A
MSTRG.48791.1	Female	Male	-6.34589	1.94808	0.00186214	0.0269587	#N/A
MSTRG.11115.1	Female	Male	-6.34136	0.890588	0.000269626	0.00713508	#N/A
g12159.t1	Female	Male	-6.34004	0.510425	0.000772363	0.0152571	#N/A
MSTRG.44959.1	Female	Male	-6.33516	0.444515	0.000187124	0.00544717	#N/A
MSTRG.4650.1	Female	Male	-6.33343	1.14604	0.00144008	0.0230018	#N/A
MSTRG.3204.1	Female	Male	-6.33053	1.16808	6.19559e-05	0.00239187	#N/A
MSTRG.40380.1	Female	Male	-6.33022	1.16981	0.00324017	0.0391012	#N/A
MSTRG.40755.1	Female	Male	-6.32955	0.439146	0.000188597	0.00547258	#N/A
MSTRG.27205.4	Female	Male	-6.32757	-0.0422162	0.000375928	0.00902835	#N/A
MSTRG.2191.1	Female	Male	-6.32712	2.28178	0.00010745	0.00357109	#N/A
MSTRG.29227.1	Female	Male	-6.32606	0.510974	0.00115073	0.0200042	#N/A
MSTRG.25457.1	Female	Male	-6.32491	0.201202	0.000146409	0.00449717	#N/A
MSTRG.26912.1	Female	Male	-6.32345	-0.0486585	0.000390796	0.0093102	#N/A
MSTRG.3436.1	Female	Male	-6.32241	1.15202	3.73326e-05	0.00163037	#N/A
MSTRG.3180.1	Female	Male	-6.31941	1.37962	0.000845993	0.0162132	#N/A
MSTRG.25549.1	Female	Male	-6.31811	-0.050512	0.000338925	0.00845258	#N/A
MSTRG.18495.2	Female	Male	-6.31478	1.57334	0.000454142	0.0104833	#N/A
g12157.t1	Female	Male	-6.31476	0.485226	0.000781891	0.0153726	#N/A
MSTRG.40158.1	Female	Male	-6.31371	1.05017	0.000194601	0.00561029	#N/A
g6466.t1	Female	Male	-6.30932	-0.0590014	0.000349764	0.0086245	#N/A
MSTRG.23925.1	Female	Male	-6.30893	1.11004	0.00102478	0.0184255	#N/A
MSTRG.49246.1	Female	Male	-6.30602	0.186296	0.000178366	0.00523247	#N/A
MSTRG.18398.2	Female	Male	-6.30553	0.422906	0.000110611	0.00365343	#N/A
MSTRG.10012.1	Female	Male	-6.30312	0.770215	0.000105254	0.00352436	#N/A
g5331.t1	Female	Male	-6.29079	0.407851	0.000122007	0.00391857	#N/A
MSTRG.24892.1	Female	Male	-6.28949	0.478619	0.0013098	0.0216044	#N/A
MSTRG.10521.1	Female	Male	-6.2843	0.743727	0.000236081	0.00648471	#N/A
g12165.t1	Female	Male	-6.28298	1.31025	0.000207684	0.00586736	#N/A
MSTRG.28453.1	Female	Male	-6.27686	1.01862	0.000150134	0.00460102	#N/A
MSTRG.15173.1	Female	Male	-6.27124	0.726599	0.000337648	0.00844247	#N/A
MSTRG.17376.1	Female	Male	-6.26979	-0.0973631	0.000410726	0.00967303	#N/A
MSTRG.43804.1	Female	Male	-6.26939	0.389125	0.000108551	0.0036032	#N/A
MSTRG.45456.2	Female	Male	-6.26591	0.726223	0.000239543	0.00654091	#N/A
g237.t1	Female	Male	-6.26164	0.379363	0.000134345	0.004236	#N/A
g377.t1	Female	Male	-6.26028	1.06772	0.0012692	0.0212093	#N/A
MSTRG.18929.1	Female	Male	-6.25872	0.376553	0.000135946	0.00427724	#N/A
MSTRG.32452.1	Female	Male	-6.25228	0.438149	0.00122387	0.0207105	#N/A
MSTRG.33349.3	Female	Male	-6.25187	2.61371	0.000639727	0.0133066	#N/A
MSTRG.17534.1	Female	Male	-6.24717	1.39976	0.00031266	0.00798941	#N/A
MSTRG.2034.1	Female	Male	-6.24638	2.07848	2.65944e-05	0.00127282	#N/A
MSTRG.1964.1	Female	Male	-6.24571	0.365924	0.0001167	0.00380754	#N/A
MSTRG.14778.1	Female	Male	-6.24501	1.16584	4.14354e-05	0.00177087	#N/A
MSTRG.6224.2	Female	Male	-6.24275	1.95825	0.000173937	0.00514201	#N/A
MSTRG.49829.1	Female	Male	-6.23471	0.564513	3.30356e-05	0.00148851	#N/A
MSTRG.1360.1	Female	Male	-6.23146	0.946875	0.000806423	0.0156752	#N/A
MSTRG.1098.1	Female	Male	-6.22965	0.110961	0.000184817	0.00539103	#N/A
MSTRG.34583.1	Female	Male	-6.2245	0.680734	0.000383778	0.0091711	#N/A
MSTRG.38867.1	Female	Male	-6.22429	2.11371	0.00328066	0.0394996	#N/A
MSTRG.21259.1	Female	Male	-6.22044	0.339889	0.000124809	0.0039942	#N/A
MSTRG.45629.1	Female	Male	-6.2198	1.94081	0.000990503	0.0180394	#N/A
g16247.t1	Female	Male	-6.21522	2.24423	0.00216767	0.0296892	#N/A
MSTRG.26682.1	Female	Male	-6.21254	1.7909	0.0031899	0.038812	#N/A
MSTRG.48877.1	Female	Male	-6.21118	0.385976	0.000932426	0.0172997	#N/A
MSTRG.33781.2	Female	Male	-6.20895	1.28775	4.64196e-05	0.00192544	#N/A
MSTRG.45545.1	Female	Male	-6.20706	0.408724	0.00220159	0.0300211	#N/A
MSTRG.265.1	Female	Male	-6.20665	4.45405	0.000457839	0.0105355	#N/A
MSTRG.2813.1	Female	Male	-6.20554	1.48106	0.00330802	0.0396695	#N/A
MSTRG.36349.1	Female	Male	-6.19983	0.665595	0.000210839	0.00592521	#N/A
MSTRG.40188.3	Female	Male	-6.19859	1.66974	0.000492162	0.0112158	#N/A
MSTRG.18097.1	Female	Male	-6.19849	0.317238	0.000145569	0.00448803	#N/A
g6801.t1	Female	Male	-6.19837	0.321185	0.00011832	0.00383701	#N/A
MSTRG.2285.1	Female	Male	-6.19363	1.89732	4.79789e-05	0.00196574	#N/A
MSTRG.3835.2	Female	Male	-6.19349	1.5074	0.000782099	0.0153726	#N/A
MSTRG.11515.8	Female	Male	-6.19321	0.0774614	0.0002052	0.0058156	#N/A
MSTRG.38219.2	Female	Male	-6.19101	0.306789	0.000228348	0.00629168	#N/A
MSTRG.3113.1	Female	Male	-6.18619	0.916328	0.000513487	0.0115282	#N/A
g15030.t1	Female	Male	-6.18502	0.0709206	0.000288625	0.00750425	#N/A
g12576.t1	Female	Male	-6.18339	2.73752	0.000511647	0.011503	#N/A
MSTRG.34727.1	Female	Male	-6.18302	1.60263	5.07086e-05	0.00205243	#N/A
MSTRG.35409.1	Female	Male	-6.17785	0.639337	0.000322825	0.00818661	#N/A
MSTRG.3576.1	Female	Male	-6.17547	1.47971	0.00162439	0.0248336	#N/A
MSTRG.253.1	Female	Male	-6.17367	2.8402	0.000161249	0.0048527	#N/A
MSTRG.15524.1	Female	Male	-6.17079	1.30191	0.000196462	0.00564279	#N/A
MSTRG.40312.1	Female	Male	-6.17067	3.44487	0.00150797	0.0235793	#N/A
MSTRG.50199.1	Female	Male	-6.16459	1.08971	2.02846e-05	0.00104164	#N/A
MSTRG.24387.1	Female	Male	-6.16164	0.634497	0.000142193	0.00440304	#N/A
MSTRG.14270.3	Female	Male	-6.1605	0.279897	0.000198199	0.00566684	#N/A
g1722.t1	Female	Male	-6.15789	3.06061	2.90292e-05	0.00135541	#N/A
MSTRG.9051.5	Female	Male	-6.15746	0.903478	0.000166246	0.00496953	#N/A
MSTRG.20102.11	Female	Male	-6.15682	1.43363	0.0034959	0.0411299	#N/A
MSTRG.38587.1	Female	Male	-6.15196	0.334042	0.00116595	0.0201015	#N/A
MSTRG.43592.1	Female	Male	-6.14796	2.00601	8.45316e-05	0.00301944	#N/A
MSTRG.22510.1	Female	Male	-6.14787	1.63298	1.93498e-05	0.00100913	#N/A
g13841.t1	Female	Male	-6.14502	0.269017	0.000141875	0.0043983	#N/A
MSTRG.2979.1	Female	Male	-6.14114	0.947018	0.00128665	0.0213634	#N/A
MSTRG.5958.1	Female	Male	-6.13508	-0.227486	0.000622756	0.0130762	#N/A
MSTRG.49275.1	Female	Male	-6.13032	0.310588	0.00113366	0.0198491	#N/A
MSTRG.49917.1	Female	Male	-6.1302	0.602916	0.00016926	0.00504003	#N/A
g4625.t1	Female	Male	-6.12289	0.86936	0.00018498	0.00539103	#N/A
MSTRG.10066.1	Female	Male	-6.12154	0.59321	0.000192237	0.00556612	#N/A
MSTRG.7993.2	Female	Male	-6.11526	0.659137	0.000193456	0.00559538	#N/A
MSTRG.47177.1	Female	Male	-6.1036	1.25353	0.000644581	0.0133891	#N/A
MSTRG.23224.1	Female	Male	-6.10078	0.912316	0.00154944	0.0240451	#N/A
g13010.t1	Female	Male	-6.09639	0.911664	0.00172551	0.0256777	#N/A
MSTRG.38634.1	Female	Male	-6.09449	1.92089	0.00239239	0.0315767	#N/A
g1728.t1	Female	Male	-6.09311	0.283214	0.00146389	0.0231882	#N/A
g8918.t1	Female	Male	-6.09227	0.279393	0.00136894	0.0221834	#N/A
MSTRG.43955.1	Female	Male	-6.08995	0.214882	0.000175202	0.00516228	#N/A
MSTRG.15902.1	Female	Male	-6.08859	1.41028	0.000640112	0.0133066	#N/A
MSTRG.30585.1	Female	Male	-6.08755	3.62796	0.00116518	0.0201015	#N/A
MSTRG.13518.1	Female	Male	-6.08348	1.35453	0.00291373	0.0365621	#N/A
MSTRG.23227.3	Female	Male	-6.08028	0.263325	0.00124797	0.0209725	#N/A
MSTRG.4939.1	Female	Male	-6.07931	0.620076	0.000161868	0.00486558	#N/A
MSTRG.364.18	Female	Male	-6.0764	0.900644	0.00224924	0.0304228	#N/A
MSTRG.3108.1	Female	Male	-6.07406	1.39327	0.00080905	0.0156856	#N/A
MSTRG.5546.7	Female	Male	-6.06927	0.908922	0.00347122	0.0409863	#N/A
MSTRG.1142.1	Female	Male	-6.0646	0.188158	0.000232145	0.00638972	#N/A
MSTRG.36974.1	Female	Male	-6.05757	1.02259	0.000524531	0.011675	#N/A
MSTRG.43661.1	Female	Male	-6.05542	0.891167	5.41172e-05	0.00216097	#N/A
g12716.t1	Female	Male	-6.05283	0.796087	0.000346827	0.00859167	#N/A
MSTRG.1717.1	Female	Male	-6.04975	1.32612	0.00349962	0.0411555	#N/A
g6301.t1	Female	Male	-6.04607	0.168143	0.000291329	0.00755254	#N/A
MSTRG.40723.1	Female	Male	-6.04419	1.00363	0.000809081	0.0156856	#N/A
MSTRG.38726.1	Female	Male	-6.04198	1.76673	5.49131e-05	0.00218298	#N/A
MSTRG.4233.1	Female	Male	-6.04045	1.32237	1.98625e-05	0.00102786	#N/A
MSTRG.11340.1	Female	Male	-6.03736	0.781324	0.000351295	0.00862747	#N/A
MSTRG.35724.3	Female	Male	-6.02876	3.42871	0.00391723	0.0444451	#N/A
MSTRG.47615.1	Female	Male	-6.0265	0.580631	0.00033226	0.00837822	#N/A
MSTRG.16803.2	Female	Male	-6.02367	0.856842	0.00292979	0.0366793	#N/A
MSTRG.6432.1	Female	Male	-6.02297	1.6439	0.00401272	0.0451646	#N/A
MSTRG.12013.1	Female	Male	-6.02118	-0.0838604	0.0003819	0.00914714	#N/A
MSTRG.41948.2	Female	Male	-6.0189	1.18262	0.000298663	0.0076905	#N/A
MSTRG.30584.1	Female	Male	-6.01342	3.0014	0.00180401	0.026451	#N/A
MSTRG.264.1	Female	Male	-6.01335	3.52116	0.00161886	0.0247775	#N/A
g11684.t1	Female	Male	-6.0028	0.127566	0.000293998	0.00759231	#N/A
g12006.t1	Female	Male	-6.00163	0.200602	0.00190031	0.0272899	#N/A
MSTRG.14393.1	Female	Male	-5.98986	0.955455	0.000660865	0.0135589	#N/A
MSTRG.45995.1	Female	Male	-5.98975	1.43229	0.00147675	0.0232679	#N/A
MSTRG.4922.1	Female	Male	-5.98913	0.189742	0.0021959	0.0299764	#N/A
MSTRG.10271.1	Female	Male	-5.98736	0.178937	0.00167633	0.025292	#N/A
MSTRG.42344.1	Female	Male	-5.984	1.8575	5.74768e-05	0.00225144	#N/A
MSTRG.49217.1	Female	Male	-5.98299	1.06529	3.52142e-05	0.00156759	#N/A
MSTRG.37193.1	Female	Male	-5.98162	3.25617	0.000117716	0.00382205	#N/A
MSTRG.43864.2	Female	Male	-5.98016	0.947561	0.000602302	0.0127686	#N/A
g9790.t1	Female	Male	-5.97975	4.06468	0.00158405	0.0244263	#N/A
MSTRG.2381.1	Female	Male	-5.97579	0.815416	0.00355021	0.0414228	#N/A
MSTRG.33097.1	Female	Male	-5.97442	0.452234	0.000237155	0.00650085	#N/A
MSTRG.46380.3	Female	Male	-5.97413	3.16763	0.00213091	0.0293716	#N/A
MSTRG.18840.2	Female	Male	-5.97402	1.02319	0.000656906	0.0134984	#N/A
MSTRG.31429.1	Female	Male	-5.97349	0.0981037	0.000349461	0.0086245	#N/A
MSTRG.45831.1	Female	Male	-5.97182	1.93788	0.000163059	0.00488519	#N/A
MSTRG.37758.1	Female	Male	-5.96853	1.00208	0.000309631	0.00792018	#N/A
MSTRG.45050.1	Female	Male	-5.96604	0.996907	0.000273544	0.00718287	#N/A
MSTRG.38808.2	Female	Male	-5.96563	0.0896418	0.000382486	0.00915297	#N/A
MSTRG.13842.1	Female	Male	-5.96356	1.39684	0.000193995	0.00560267	#N/A
MSTRG.2049.1	Female	Male	-5.96225	1.22354	0.000447854	0.010365	#N/A
MSTRG.20944.1	Female	Male	-5.9584	0.780831	0.00222316	0.0302083	#N/A
MSTRG.15371.1	Female	Male	-5.95297	0.424603	0.000424876	0.0099363	#N/A
g16326.t1	Female	Male	-5.95286	1.56972	0.00343431	0.0406555	#N/A
MSTRG.11237.1	Female	Male	-5.95274	0.150138	0.00188085	0.0271562	#N/A
MSTRG.12557.1	Female	Male	-5.94754	0.619971	6.93398e-05	0.00261284	#N/A
MSTRG.33343.1	Female	Male	-5.94686	1.10745	0.000542688	0.0119499	#N/A
MSTRG.30274.2	Female	Male	-5.94578	2.5559	0.00058204	0.0124575	#N/A
MSTRG.3907.1	Female	Male	-5.94463	1.02895	4.48443e-05	0.00188346	#N/A
MSTRG.47648.4	Female	Male	-5.93861	0.410264	0.000456233	0.0105225	#N/A
MSTRG.40708.1	Female	Male	-5.93854	1.25888	0.00121274	0.0205813	#N/A
MSTRG.43089.1	Female	Male	-5.93759	0.492022	0.000331067	0.00836389	#N/A
g13508.t1	Female	Male	-5.93706	0.139595	0.00210914	0.0292305	#N/A
MSTRG.15117.1	Female	Male	-5.93276	0.402018	0.000553385	0.0120662	#N/A
MSTRG.49098.1	Female	Male	-5.93058	1.52252	0.000196783	0.00564279	#N/A
MSTRG.38540.1	Female	Male	-5.93009	1.20135	0.00339727	0.0403779	#N/A
MSTRG.23222.1	Female	Male	-5.92933	1.82192	0.00387998	0.0441348	#N/A
g12912.t1	Female	Male	-5.9279	0.48485	0.00037549	0.00902835	#N/A
MSTRG.226.1	Female	Male	-5.92195	0.265784	0.00010539	0.00352452	#N/A
MSTRG.47261.2	Female	Male	-5.9159	0.887952	0.000566764	0.0121907	#N/A
MSTRG.2917.1	Female	Male	-5.91327	0.65474	0.000710954	0.0143014	#N/A
MSTRG.25355.1	Female	Male	-5.91239	1.3992	7.73974e-05	0.00284436	#N/A
g13823.t1	Female	Male	-5.91143	0.722123	0.00169653	0.0254279	#N/A
g7330.t1	Female	Male	-5.90805	1.51967	3.10346e-05	0.00142663	#N/A
MSTRG.14018.5	Female	Male	-5.90657	0.753762	0.000136212	0.00427724	#N/A
MSTRG.37592.1	Female	Male	-5.90617	0.726901	0.00217205	0.0297235	#N/A
MSTRG.31084.2	Female	Male	-5.90367	0.733765	0.00280127	0.0355976	#N/A
MSTRG.43689.1	Female	Male	-5.90241	1.1904	6.22168e-05	0.00239503	#N/A
MSTRG.50200.1	Female	Male	-5.90178	1.16398	0.00231098	0.0308985	#N/A
MSTRG.20008.1	Female	Male	-5.90041	0.104161	0.00221299	0.0301152	#N/A
MSTRG.31854.1	Female	Male	-5.89539	0.645769	0.000412949	0.00970829	#N/A
MSTRG.45041.1	Female	Male	-5.89514	1.32711	0.00014807	0.00454298	#N/A
MSTRG.13432.1	Female	Male	-5.88354	1.74175	0.000566839	0.0121907	#N/A
g208.t1	Female	Male	-5.88352	1.17531	0.000239434	0.00654091	#N/A
MSTRG.15670.1	Female	Male	-5.8821	0.0906835	0.00247985	0.0325088	#N/A
MSTRG.2187.1	Female	Male	-5.88047	0.81286	0.000116426	0.00380598	#N/A
g15492.t1	Female	Male	-5.87927	1.21311	0.000532624	0.0117865	#N/A
MSTRG.30645.1	Female	Male	-5.87629	0.354898	0.000366446	0.00885876	#N/A
MSTRG.9793.1	Female	Male	-5.87345	1.02136	0.001704	0.025492	#N/A
MSTRG.2449.1	Female	Male	-5.8716	0.705485	0.00312869	0.038381	#N/A
g11734.t1	Female	Male	-5.8713	1.71731	0.00137327	0.02224	#N/A
MSTRG.42748.2	Female	Male	-5.86883	1.59525	0.00210007	0.0292024	#N/A
MSTRG.20042.15	Female	Male	-5.86237	4.61812	0.00087607	0.016623	#N/A
MSTRG.44341.1	Female	Male	-5.85715	0.836574	0.00041835	0.00980081	#N/A
MSTRG.17162.1	Female	Male	-5.84469	0.666736	0.0022966	0.030776	#N/A
g2389.t1	Female	Male	-5.84463	0.521974	3.9268e-05	0.00169448	#N/A
MSTRG.10718.1	Female	Male	-5.844	1.31492	0.00186045	0.0269488	#N/A
MSTRG.20287.1	Female	Male	-5.83313	0.576847	0.000866072	0.016517	#N/A
MSTRG.45800.1	Female	Male	-5.83256	1.10511	0.00322817	0.0390369	#N/A
MSTRG.24870.1	Female	Male	-5.82931	0.507342	3.58922e-05	0.00158459	#N/A
MSTRG.239.3	Female	Male	-5.82735	0.807673	0.000442308	0.0102543	#N/A
MSTRG.44606.1	Female	Male	-5.81318	1.29515	0.000943583	0.0174267	#N/A
MSTRG.39799.1	Female	Male	-5.80651	0.559851	0.000502117	0.011346	#N/A
MSTRG.890.4	Female	Male	-5.80471	-0.0647834	0.000543741	0.0119534	#N/A
g7517.t1	Female	Male	-5.79962	1.42176	0.00418295	0.0465976	#N/A
MSTRG.26553.1	Female	Male	-5.79945	1.65279	0.000460587	0.0105864	#N/A
MSTRG.240.1	Female	Male	-5.79726	1.86446	9.03172e-05	0.00317522	#N/A
MSTRG.24282.1	Female	Male	-5.79306	0.00732346	0.00292639	0.0366538	#N/A
MSTRG.18837.1	Female	Male	-5.7875	0.612254	0.00252139	0.0328739	#N/A
g6505.t1	Female	Male	-5.78572	6.02231	0.00059378	0.0126651	#N/A
MSTRG.2377.1	Female	Male	-5.78498	1.76303	0.000174892	0.00515882	#N/A
MSTRG.15497.1	Female	Male	-5.77368	2.5505	8.88308e-05	0.0031312	#N/A
MSTRG.45548.1	Female	Male	-5.77088	1.10744	0.000729131	0.0145902	#N/A
MSTRG.32004.1	Female	Male	-5.76924	1.49905	4.3124e-05	0.00183424	#N/A
MSTRG.24694.1	Female	Male	-5.76748	0.740616	0.000806785	0.0156752	#N/A
MSTRG.15408.1	Female	Male	-5.76722	-0.0155883	0.00314748	0.0385389	#N/A
MSTRG.1958.1	Female	Male	-5.76511	-0.102804	0.000588682	0.0125896	#N/A
MSTRG.48243.1	Female	Male	-5.76206	1.51151	7.90528e-05	0.00289327	#N/A
MSTRG.9885.1	Female	Male	-5.76144	-0.107616	0.000606962	0.0128471	#N/A
MSTRG.25794.1	Female	Male	-5.75953	1.09621	6.6962e-05	0.00254474	#N/A
MSTRG.37136.1	Female	Male	-5.75542	0.798796	0.000505764	0.0114091	#N/A
g11233.t1	Female	Male	-5.75533	0.590415	0.00333001	0.0398796	#N/A
g12119.t1	Female	Male	-5.75488	1.21962	3.49477e-05	0.00156536	#N/A
MSTRG.7048.1	Female	Male	-5.75458	0.996948	9.17228e-05	0.00319525	#N/A
MSTRG.28467.1	Female	Male	-5.75387	0.907773	0.00180532	0.026451	#N/A
MSTRG.21321.3	Female	Male	-5.74329	0.302623	0.000412116	0.00969722	#N/A
g8530.t1	Female	Male	-5.74259	0.500585	0.000457076	0.0105328	#N/A
MSTRG.43261.1	Female	Male	-5.74117	-0.0388687	0.00336814	0.0401745	#N/A
MSTRG.11290.1	Female	Male	-5.74083	2.52881	0.0014448	0.0230381	#N/A
MSTRG.22638.1	Female	Male	-5.73829	0.719578	0.000624113	0.0130858	#N/A
MSTRG.33271.1	Female	Male	-5.73103	0.554493	0.00251389	0.0328081	#N/A
MSTRG.32442.1	Female	Male	-5.72941	1.17605	0.000543138	0.0119499	#N/A
MSTRG.34049.1	Female	Male	-5.72933	0.671879	3.88963e-05	0.0016817	#N/A
MSTRG.4421.1	Female	Male	-5.72914	1.5697	0.00353777	0.0413966	#N/A
MSTRG.45939.1	Female	Male	-5.72872	1.46176	8.28897e-05	0.00299275	#N/A
MSTRG.20986.3	Female	Male	-5.72452	1.06453	0.000678891	0.0138017	#N/A
MSTRG.36879.1	Female	Male	-5.72383	0.482324	0.000497633	0.0112903	#N/A
MSTRG.3913.1	Female	Male	-5.71995	0.201392	0.00065001	0.01346	#N/A
MSTRG.2777.1	Female	Male	-5.71505	1.18294	0.00357197	0.0415679	#N/A
MSTRG.6591.1	Female	Male	-5.71355	0.195856	0.000559601	0.0121439	#N/A
MSTRG.31225.3	Female	Male	-5.71314	1.56813	0.000497876	0.0112903	#N/A
g2945.t1	Female	Male	-5.7131	-0.153217	0.000678534	0.0138017	#N/A
MSTRG.29134.1	Female	Male	-5.71021	0.392984	0.000104052	0.00350606	#N/A
MSTRG.3078.1	Female	Male	-5.70849	0.976113	0.000566767	0.0121907	#N/A
MSTRG.27201.1	Female	Male	-5.70357	-0.16232	0.00069811	0.0141382	#N/A
MSTRG.49318.1	Female	Male	-5.69864	0.540449	0.00398382	0.0449339	#N/A
MSTRG.46101.1	Female	Male	-5.69855	1.42775	0.000782595	0.0153726	#N/A
MSTRG.3046.1	Female	Male	-5.6976	1.76781	0.000119045	0.00383818	#N/A
g5322.t1	Female	Male	-5.69481	0.637554	6.8829e-05	0.00259725	#N/A
MSTRG.13951.4	Female	Male	-5.69071	0.546461	0.000205431	0.00581599	#N/A
MSTRG.37460.1	Female	Male	-5.68211	1.11182	7.54197e-05	0.00278699	#N/A
MSTRG.14791.1	Female	Male	-5.68115	1.52945	0.000105659	0.00352908	#N/A
MSTRG.24630.1	Female	Male	-5.67747	2.25228	0.0042631	0.0470779	#N/A
MSTRG.44511.1	Female	Male	-5.6684	-0.106637	0.00384952	0.043919	#N/A
MSTRG.2796.2	Female	Male	-5.66813	0.42221	0.000903993	0.0169011	#N/A
MSTRG.3389.1	Female	Male	-5.66701	2.11601	0.00056352	0.012178	#N/A
MSTRG.40908.1	Female	Male	-5.65439	0.488818	0.00335719	0.0400975	#N/A
MSTRG.24357.1	Female	Male	-5.65403	0.139277	0.000668032	0.013653	#N/A
MSTRG.41108.1	Female	Male	-5.65257	-0.425122	0.0011951	0.0204044	#N/A
MSTRG.33327.1	Female	Male	-5.64881	0.484897	0.00350826	0.0411911	#N/A
MSTRG.40493.1	Female	Male	-5.64857	0.817305	0.00103777	0.0186339	#N/A
MSTRG.2969.1	Female	Male	-5.64819	1.75231	0.00189138	0.0272115	#N/A
MSTRG.30748.3	Female	Male	-5.64691	0.740323	5.656e-05	0.00223516	#N/A
g479.t1	Female	Male	-5.64586	0.503343	0.000220402	0.00616157	#N/A
MSTRG.40499.1	Female	Male	-5.64148	0.393351	0.00118158	0.0202748	#N/A
MSTRG.6009.1	Female	Male	-5.64039	0.000625449	0.000363177	0.00880911	#N/A
MSTRG.48715.1	Female	Male	-5.63644	2.94311	0.000724735	0.014524	#N/A
MSTRG.21596.1	Female	Male	-5.63499	2.17093	0.00036985	0.00891438	#N/A
g5332.t2	Female	Male	-5.63454	1.23207	0.000173597	0.00513762	#N/A
MSTRG.3959.1	Female	Male	-5.62923	0.467826	0.00374799	0.042999	#N/A
g9429.t1	Female	Male	-5.61891	0.465153	0.0045331	0.0492519	#N/A
MSTRG.26674.1	Female	Male	-5.61696	0.588002	0.00157058	0.0243027	#N/A
MSTRG.2794.1	Female	Male	-5.61572	0.459203	0.00424411	0.0470173	#N/A
MSTRG.9892.1	Female	Male	-5.61526	2.10427	0.000360482	0.00875963	#N/A
MSTRG.44336.1	Female	Male	-5.61467	0.893411	0.00405919	0.0455917	#N/A
g13952.t2	Female	Male	-5.61273	0.093662	0.000940712	0.0173931	#N/A
MSTRG.26161.1	Female	Male	-5.60955	0.0955631	0.000800308	0.0156174	#N/A
MSTRG.47294.1	Female	Male	-5.60917	1.20611	0.000141328	0.00438642	#N/A
MSTRG.15864.1	Female	Male	-5.60819	0.369348	0.000698613	0.0141382	#N/A
g3349.t1	Female	Male	-5.60696	1.59471	7.50984e-05	0.00278069	#N/A
MSTRG.15307.1	Female	Male	-5.60305	1.19746	0.000751701	0.0149315	#N/A
MSTRG.20962.1	Female	Male	-5.5917	1.4433	0.000132891	0.00420754	#N/A
MSTRG.2769.1	Female	Male	-5.58726	0.0714429	0.000905964	0.0169261	#N/A
MSTRG.2829.1	Female	Male	-5.5824	0.161585	0.000950546	0.0175144	#N/A
g12795.t1	Female	Male	-5.58186	0.0686701	0.000866165	0.016517	#N/A
MSTRG.131.1	Female	Male	-5.57579	2.38725	0.000828059	0.0159841	#N/A
MSTRG.17204.1	Female	Male	-5.57536	1.06329	0.00160372	0.0246303	#N/A
MSTRG.2537.1	Female	Male	-5.57266	1.07436	9.30738e-05	0.00323389	#N/A
MSTRG.14998.1	Female	Male	-5.57227	0.414012	0.00413369	0.0461838	#N/A
MSTRG.8109.1	Female	Male	-5.57129	0.548781	0.00169255	0.0254253	#N/A
MSTRG.11330.1	Female	Male	-5.56945	0.622637	0.000777213	0.0153006	#N/A
MSTRG.11783.1	Female	Male	-5.56191	2.07447	0.000129452	0.00411345	#N/A
MSTRG.37990.2	Female	Male	-5.56035	1.51955	0.00242851	0.0319746	#N/A
MSTRG.39985.2	Female	Male	-5.55795	0.315543	0.00118494	0.0202957	#N/A
MSTRG.246.1	Female	Male	-5.55777	0.827308	0.000551106	0.0120362	#N/A
MSTRG.45784.1	Female	Male	-5.55573	1.43322	0.000124115	0.00398151	#N/A
MSTRG.270.1	Female	Male	-5.55386	1.63149	5.93756e-05	0.00230681	#N/A
MSTRG.22696.3	Female	Male	-5.55197	1.40299	0.000364499	0.00882517	#N/A
MSTRG.11814.1	Female	Male	-5.55102	2.33374	0.000136168	0.00427724	#N/A
MSTRG.49895.1	Female	Male	-5.55007	0.387601	0.0038996	0.0442852	#N/A
MSTRG.29601.1	Female	Male	-5.54755	0.125753	0.000898022	0.0168352	#N/A
MSTRG.48262.1	Female	Male	-5.54582	0.304671	0.000998271	0.0181438	#N/A
MSTRG.20674.1	Female	Male	-5.54358	1.98466	0.000110197	0.00364426	#N/A
MSTRG.15545.3	Female	Male	-5.54302	0.529515	0.00105929	0.0188935	#N/A
MSTRG.40535.1	Female	Male	-5.53986	1.27894	0.000109617	0.00362957	#N/A
MSTRG.30583.1	Female	Male	-5.53916	3.52087	0.00150738	0.0235793	#N/A
MSTRG.6507.1	Female	Male	-5.53698	1.38653	0.00373219	0.0428913	#N/A
MSTRG.33458.1	Female	Male	-5.53528	1.82173	0.000702206	0.0141787	#N/A
MSTRG.23192.2	Female	Male	-5.53459	0.0210639	0.00104201	0.0186474	#N/A
g784.t1	Female	Male	-5.53158	-0.329054	0.00120246	0.0205117	#N/A
g8168.t1	Female	Male	-5.52737	-0.331951	0.00119199	0.0203774	#N/A
MSTRG.4954.1	Female	Male	-5.52245	1.25893	0.00059154	0.0126406	#N/A
MSTRG.3248.1	Female	Male	-5.52132	1.11365	0.000621615	0.0130642	#N/A
MSTRG.27487.1	Female	Male	-5.51859	0.358674	0.00411195	0.0459973	#N/A
MSTRG.43889.1	Female	Male	-5.51812	2.96853	0.000118798	0.00383818	#N/A
MSTRG.17598.1	Female	Male	-5.51794	0.696306	0.000935009	0.0173236	#N/A
MSTRG.27144.1	Female	Male	-5.51724	-0.343023	0.00127584	0.0212804	#N/A
g10225.t1	Female	Male	-5.51479	0.00292025	0.00112552	0.0197458	#N/A
MSTRG.46773.2	Female	Male	-5.51438	0.360225	0.00462312	0.0499141	#N/A
MSTRG.20769.1	Female	Male	-5.51354	0.462472	0.000191876	0.00556169	#N/A
MSTRG.15766.2	Female	Male	-5.51051	0.572431	0.00111267	0.0196102	#N/A
MSTRG.13559.1	Female	Male	-5.50688	0.495732	0.00100207	0.0181881	#N/A
MSTRG.22513.1	Female	Male	-5.50519	0.606202	0.000103645	0.00349676	#N/A
MSTRG.21261.1	Female	Male	-5.50496	2.43071	0.000138551	0.00432026	#N/A
MSTRG.33800.1	Female	Male	-5.50441	-0.356158	0.00135676	0.0220996	#N/A
MSTRG.2889.1	Female	Male	-5.50425	1.96494	0.00204515	0.0286772	#N/A
MSTRG.24455.1	Female	Male	-5.50396	1.25256	0.00190785	0.0273772	#N/A
g4182.t1	Female	Male	-5.50206	0.343611	0.00425511	0.0470419	#N/A
MSTRG.15764.1	Female	Male	-5.49854	0.340629	0.00442807	0.0483955	#N/A
MSTRG.25872.1	Female	Male	-5.49774	3.58396	0.000335006	0.00841016	#N/A
MSTRG.18972.1	Female	Male	-5.49173	1.85171	0.000137951	0.00431161	#N/A
MSTRG.32126.3	Female	Male	-5.4842	1.35155	6.85433e-05	0.00259725	#N/A
MSTRG.3928.1	Female	Male	-5.48334	0.327727	0.00454021	0.0492574	#N/A
MSTRG.24704.1	Female	Male	-5.48181	0.736836	0.000187609	0.00544981	#N/A
MSTRG.24002.1	Female	Male	-5.48069	1.83781	0.000255601	0.00685206	#N/A
g9575.t1	Female	Male	-5.47685	0.34783	0.000335604	0.00841016	#N/A
MSTRG.2183.1	Female	Male	-5.47589	1.85229	0.000530812	0.0117561	#N/A
g12259.t1	Female	Male	-5.47548	0.738308	0.000319686	0.00813013	#N/A
MSTRG.8060.1	Female	Male	-5.47282	1.09883	0.000146168	0.0044949	#N/A
MSTRG.29111.1	Female	Male	-5.47063	1.76437	0.0009268	0.0172363	#N/A
MSTRG.1962.2	Female	Male	-5.46569	0.809995	0.00152949	0.0238187	#N/A
MSTRG.18849.1	Female	Male	-5.46458	0.914065	0.00178615	0.0262853	#N/A
MSTRG.6900.1	Female	Male	-5.4636	1.90366	4.51286e-05	0.00188975	#N/A
MSTRG.47857.1	Female	Male	-5.46061	0.225187	0.00116466	0.0201015	#N/A
MSTRG.12933.1	Female	Male	-5.45872	0.412612	0.000102601	0.00347468	#N/A
MSTRG.27649.1	Female	Male	-5.45845	-0.0518297	0.00136454	0.0221656	#N/A
MSTRG.13358.1	Female	Male	-5.4566	0.220937	0.00114297	0.0199341	#N/A
MSTRG.22830.1	Female	Male	-5.45429	0.627888	0.00172754	0.0256777	#N/A
g5629.t1	Female	Male	-5.45221	0.627354	0.00157486	0.0243176	#N/A
MSTRG.12502.1	Female	Male	-5.45184	-0.406223	0.00156205	0.0242135	#N/A
MSTRG.15504.1	Female	Male	-5.44996	1.05065	0.00013399	0.00423231	#N/A
MSTRG.40652.1	Female	Male	-5.44915	0.213489	0.00126363	0.0211604	#N/A
MSTRG.2332.1	Female	Male	-5.44784	4.43812	0.00305334	0.0377189	#N/A
g5633.t1	Female	Male	-5.44343	0.788504	0.00160114	0.0246048	#N/A
MSTRG.50135.1	Female	Male	-5.44168	1.04241	0.000160215	0.00483791	#N/A
g7995.t1	Female	Male	-5.44112	0.54438	0.000105041	0.00352164	#N/A
g11089.t1	Female	Male	-5.43849	0.429325	0.00126369	0.0211604	#N/A
MSTRG.33802.1	Female	Male	-5.43383	1.06339	0.0019113	0.0273985	#N/A
g1943.t1	Female	Male	-5.43013	1.02803	7.63882e-05	0.00281113	#N/A
MSTRG.5953.1	Female	Male	-5.42549	0.410244	0.00202208	0.0285105	#N/A
MSTRG.35619.1	Female	Male	-5.41798	-0.437917	0.00167798	0.025292	#N/A
MSTRG.41491.1	Female	Male	-5.4168	0.182344	0.00134606	0.0220836	#N/A
MSTRG.15864.3	Female	Male	-5.40935	1.92714	5.00955e-05	0.00203334	#N/A
g13000.t1	Female	Male	-5.40845	0.395056	0.00195155	0.0277722	#N/A
MSTRG.31897.1	Female	Male	-5.39803	0.508066	0.000257103	0.0068733	#N/A
MSTRG.6544.1	Female	Male	-5.39752	0.385991	0.00181099	0.0265051	#N/A
MSTRG.21161.1	Female	Male	-5.39528	2.57441	6.58924e-05	0.00251482	#N/A
MSTRG.8647.1	Female	Male	-5.39524	1.12914	0.000391567	0.00932027	#N/A
MSTRG.4278.1	Female	Male	-5.39509	1.77337	0.000570833	0.012247	#N/A
MSTRG.2516.1	Female	Male	-5.39409	0.995919	0.00101356	0.0183251	#N/A
MSTRG.28034.3	Female	Male	-5.38699	0.652765	0.000355311	0.00868126	#N/A
MSTRG.43669.1	Female	Male	-5.3869	0.55859	9.58813e-05	0.00330143	#N/A
MSTRG.39275.1	Female	Male	-5.38659	3.00521	0.000792949	0.0155077	#N/A
MSTRG.249.1	Female	Male	-5.38561	2.31739	0.00133596	0.0219989	#N/A
MSTRG.26966.1	Female	Male	-5.38547	1.01684	0.00205577	0.0287807	#N/A
g13578.t1	Female	Male	-5.38229	0.255914	0.000335673	0.00841016	#N/A
MSTRG.33787.4	Female	Male	-5.38217	1.13074	0.000355829	0.00868599	#N/A
MSTRG.3503.1	Female	Male	-5.38171	1.35673	9.36993e-05	0.0032514	#N/A
MSTRG.22718.1	Female	Male	-5.37669	0.641194	0.000321271	0.00815492	#N/A
MSTRG.7427.1	Female	Male	-5.37637	2.69461	7.50151e-05	0.00278069	#N/A
MSTRG.942.1	Female	Male	-5.37385	2.07509	0.00117531	0.0201954	#N/A
MSTRG.24902.1	Female	Male	-5.37161	0.362025	0.00179944	0.0264435	#N/A
MSTRG.43324.1	Female	Male	-5.36886	1.5492	0.000121097	0.00389402	#N/A
MSTRG.25303.2	Female	Male	-5.36809	-0.138506	0.0016352	0.0249634	#N/A
MSTRG.3287.1	Female	Male	-5.36719	1.83049	0.000726989	0.0145583	#N/A
MSTRG.3549.1	Female	Male	-5.36708	0.323596	0.000241642	0.00657001	#N/A
MSTRG.9153.1	Female	Male	-5.36707	0.131107	0.00194377	0.0277056	#N/A
g7735.t1	Female	Male	-5.36535	0.13231	0.00158637	0.0244481	#N/A
MSTRG.251.1	Female	Male	-5.36526	0.434758	0.00146351	0.0231882	#N/A
MSTRG.34125.1	Female	Male	-5.36443	0.54289	0.0018918	0.0272115	#N/A
MSTRG.45026.1	Female	Male	-5.36326	2.01436	0.000238027	0.00651808	#N/A
MSTRG.38243.1	Female	Male	-5.36105	0.96665	0.000196728	0.00564279	#N/A
MSTRG.16736.1	Female	Male	-5.3583	0.630367	0.000518621	0.011582	#N/A
MSTRG.24719.1	Female	Male	-5.3566	-0.266095	0.00105881	0.0188935	#N/A
g16574.t1	Female	Male	-5.35658	1.64347	0.00172091	0.0256639	#N/A
MSTRG.28909.1	Female	Male	-5.35465	0.417051	0.00113553	0.0198563	#N/A
MSTRG.11616.1	Female	Male	-5.34951	2.66934	0.000104839	0.00352164	#N/A
MSTRG.7161.2	Female	Male	-5.34695	0.698756	0.00146217	0.0231882	#N/A
MSTRG.27403.1	Female	Male	-5.3445	1.53288	0.000752322	0.0149315	#N/A
MSTRG.43348.1	Female	Male	-5.34403	-0.0630248	0.00157393	0.0243176	#N/A
MSTRG.8491.1	Female	Male	-5.3426	0.336115	0.00167193	0.0252859	#N/A
g9165.t1	Female	Male	-5.34119	0.972873	0.00015485	0.00471851	#N/A
MSTRG.9075.1	Female	Male	-5.33992	0.96843	0.00262257	0.033945	#N/A
MSTRG.18728.1	Female	Male	-5.33867	1.10606	5.83381e-05	0.0022764	#N/A
MSTRG.45042.1	Female	Male	-5.33769	1.32523	4.66488e-05	0.00192897	#N/A
MSTRG.47689.1	Female	Male	-5.33553	3.28419	0.000914934	0.0170698	#N/A
MSTRG.3452.2	Female	Male	-5.33538	2.34975	0.00370246	0.0426596	#N/A
MSTRG.1055.1	Female	Male	-5.33517	0.643481	8.41578e-05	0.00301817	#N/A
MSTRG.14804.1	Female	Male	-5.33217	0.0981158	0.00202061	0.0285105	#N/A
g378.t1	Female	Male	-5.33114	1.08099	0.000323576	0.00819788	#N/A
MSTRG.40155.3	Female	Male	-5.32835	0.670454	0.00321626	0.0389181	#N/A
MSTRG.13243.1	Female	Male	-5.32408	1.78192	0.000397656	0.00944001	#N/A
MSTRG.9275.1	Female	Male	-5.32381	2.72757	0.000129458	0.00411345	#N/A
MSTRG.24668.1	Female	Male	-5.32239	1.54379	0.00300375	0.0373431	#N/A
MSTRG.8613.1	Female	Male	-5.32147	0.836178	0.000104995	0.00352164	#N/A
MSTRG.7395.1	Female	Male	-5.32098	-0.186633	0.00204377	0.0286727	#N/A
MSTRG.2823.1	Female	Male	-5.31953	2.1595	0.000538077	0.0118776	#N/A
g12996.t1	Female	Male	-5.31442	-0.197991	0.00252013	0.0328735	#N/A
MSTRG.17086.1	Female	Male	-5.31339	0.75852	0.00142467	0.0228101	#N/A
MSTRG.44223.1	Female	Male	-5.31126	0.18647	0.000499982	0.0113168	#N/A
MSTRG.17985.1	Female	Male	-5.30555	0.657751	0.00182049	0.0266295	#N/A
MSTRG.43177.1	Female	Male	-5.30302	0.952197	0.00034976	0.0086245	#N/A
MSTRG.24978.1	Female	Male	-5.30164	0.744599	0.00130114	0.0215014	#N/A
MSTRG.43114.4	Female	Male	-5.30021	0.0678224	0.00211449	0.0292507	#N/A
MSTRG.2704.1	Female	Male	-5.29987	1.66494	0.000145889	0.00449149	#N/A
MSTRG.42209.1	Female	Male	-5.29775	0.365469	0.00135206	0.0220836	#N/A
MSTRG.49437.1	Female	Male	-5.29559	1.91687	0.000777035	0.0153006	#N/A
MSTRG.10958.1	Female	Male	-5.2939	1.02696	0.000309075	0.00792018	#N/A
MSTRG.47252.1	Female	Male	-5.29269	1.16236	0.000974429	0.0178317	#N/A
MSTRG.1144.1	Female	Male	-5.29215	1.66299	0.000497963	0.0112903	#N/A
MSTRG.39648.1	Female	Male	-5.29074	-0.00539211	0.000320168	0.00813464	#N/A
MSTRG.2718.2	Female	Male	-5.29064	0.923521	0.00037582	0.00902835	#N/A
MSTRG.6587.1	Female	Male	-5.29058	1.2691	0.000473794	0.0108248	#N/A
MSTRG.9336.1	Female	Male	-5.29051	1.4899	0.000977572	0.0178769	#N/A
MSTRG.30054.1	Female	Male	-5.28903	0.779688	0.00435606	0.0478415	#N/A
MSTRG.28879.1	Female	Male	-5.28572	0.637235	0.00209883	0.0292024	#N/A
MSTRG.45056.1	Female	Male	-5.28408	3.42817	0.00161572	0.0247578	#N/A
MSTRG.2520.1	Female	Male	-5.28354	2.78903	0.00222322	0.0302083	#N/A
MSTRG.22357.1	Female	Male	-5.28263	1.37447	0.000296681	0.00764683	#N/A
MSTRG.49919.1	Female	Male	-5.27823	0.771295	0.00392496	0.044508	#N/A
g4226.t1	Female	Male	-5.27714	-0.225559	0.00210292	0.0292116	#N/A
MSTRG.24520.1	Female	Male	-5.27437	0.351355	0.00189948	0.0272899	#N/A
MSTRG.13515.1	Female	Male	-5.27363	0.88053	0.000158901	0.00480911	#N/A
MSTRG.50608.1	Female	Male	-5.26898	0.58274	0.000227558	0.00628284	#N/A
MSTRG.13640.1	Female	Male	-5.26701	0.618281	0.00233247	0.0311237	#N/A
MSTRG.37222.1	Female	Male	-5.26567	1.02298	0.00228763	0.030709	#N/A
MSTRG.5967.1	Female	Male	-5.26481	0.261019	0.00200285	0.0283214	#N/A
g11242.t1	Female	Male	-5.26111	0.913187	0.000327871	0.00829882	#N/A
MSTRG.3016.1	Female	Male	-5.25626	0.986053	0.000226024	0.00626472	#N/A
MSTRG.34453.1	Female	Male	-5.2465	0.697085	0.000258877	0.00691218	#N/A
MSTRG.7555.2	Female	Male	-5.24449	0.124685	0.000648726	0.0134543	#N/A
MSTRG.24253.1	Female	Male	-5.24364	0.0141356	0.00227539	0.0305909	#N/A
MSTRG.25763.4	Female	Male	-5.24175	0.555808	0.000163938	0.00490604	#N/A
MSTRG.272.1	Female	Male	-5.24132	2.00262	0.000620944	0.0130603	#N/A
g14687.t1	Female	Male	-5.2412	0.996559	0.000553011	0.0120662	#N/A
MSTRG.50421.1	Female	Male	-5.23846	0.520185	0.00081905	0.015833	#N/A
MSTRG.3495.1	Female	Male	-5.23765	1.78752	0.00167384	0.0252887	#N/A
MSTRG.10291.1	Female	Male	-5.23759	1.13059	8.4365e-05	0.00301876	#N/A
MSTRG.21139.1	Female	Male	-5.23746	0.690999	0.00195101	0.0277722	#N/A
g6786.t1	Female	Male	-5.23702	0.73956	0.0025105	0.0327958	#N/A
MSTRG.18901.1	Female	Male	-5.23503	1.64831	0.00389218	0.0442548	#N/A
MSTRG.1275.3	Female	Male	-5.23415	1.7016	0.000856901	0.0163754	#N/A
MSTRG.9940.2	Female	Male	-5.22541	0.967022	0.000562837	0.012178	#N/A
MSTRG.13754.1	Female	Male	-5.22487	0.298369	0.00173332	0.0257344	#N/A
MSTRG.24182.1	Female	Male	-5.22432	0.676101	0.000276811	0.00724638	#N/A
MSTRG.27599.1	Female	Male	-5.22371	2.25592	0.00010593	0.00353372	#N/A
MSTRG.32730.1	Female	Male	-5.22282	0.295526	0.00164773	0.0250327	#N/A
MSTRG.43277.1	Female	Male	-5.22179	0.411206	0.00171172	0.0255696	#N/A
MSTRG.27212.1	Female	Male	-5.21901	1.78553	0.00298398	0.0371954	#N/A
MSTRG.33696.1	Female	Male	-5.21892	0.569852	0.00296668	0.0370372	#N/A
MSTRG.39574.1	Female	Male	-5.20911	3.20061	0.000284388	0.0074157	#N/A
g9324.t1	Female	Male	-5.20644	0.396021	0.00184603	0.0268307	#N/A
MSTRG.33426.1	Female	Male	-5.20427	1.65389	0.000351819	0.00862747	#N/A
g13745.t1	Female	Male	-5.20387	1.28927	0.000246451	0.00666014	#N/A
MSTRG.8172.1	Female	Male	-5.20207	1.20569	0.00229289	0.0307606	#N/A
MSTRG.18268.5	Female	Male	-5.20193	1.10448	0.000204068	0.00578963	#N/A
MSTRG.34847.1	Female	Male	-5.20083	0.838329	0.000351633	0.00862747	#N/A
MSTRG.44005.1	Female	Male	-5.19695	0.647475	0.000224505	0.00624366	#N/A
MSTRG.27624.1	Female	Male	-5.19374	1.39403	0.000118741	0.00383818	#N/A
g10463.t1	Female	Male	-5.19183	0.67973	9.95391e-05	0.00340111	#N/A
MSTRG.28395.1	Female	Male	-5.1899	1.05444	0.000223969	0.00623524	#N/A
MSTRG.6310.1	Female	Male	-5.18834	0.375125	0.00248423	0.0325162	#N/A
MSTRG.7049.2	Female	Male	-5.18341	0.502576	0.000381202	0.00913859	#N/A
MSTRG.35457.1	Female	Male	-5.18134	-0.319664	0.00288336	0.0362678	#N/A
MSTRG.16151.1	Female	Male	-5.17753	1.0442	0.000758105	0.0150168	#N/A
MSTRG.42921.1	Female	Male	-5.17693	1.26304	0.000252108	0.00677879	#N/A
MSTRG.21711.1	Female	Male	-5.17621	0.629164	0.000270539	0.00713807	#N/A
MSTRG.9685.1	Female	Male	-5.17558	0.664268	0.000104501	0.00351676	#N/A
MSTRG.19145.1	Female	Male	-5.17503	1.14838	0.00429279	0.047302	#N/A
MSTRG.28821.1	Female	Male	-5.17494	1.14915	0.00399803	0.0450562	#N/A
MSTRG.13490.1	Female	Male	-5.17453	0.170933	0.00316021	0.0386101	#N/A
MSTRG.1347.5	Female	Male	-5.17361	0.162961	0.00368989	0.0426066	#N/A
MSTRG.37083.1	Female	Male	-5.17209	0.810192	0.0033466	0.0400123	#N/A
MSTRG.3600.1	Female	Male	-5.171	2.49119	0.000676033	0.0137855	#N/A
g16456.t1	Female	Male	-5.16521	0.132663	0.000395059	0.00938669	#N/A
g7928.t1	Female	Male	-5.15995	2.48333	0.00223065	0.0302283	#N/A
MSTRG.17191.2	Female	Male	-5.1566	0.908989	0.00115434	0.0200411	#N/A
g174.t1	Female	Male	-5.15559	0.608996	0.000267186	0.00708454	#N/A
MSTRG.43601.1	Female	Male	-5.15122	-0.238523	0.00263355	0.0340213	#N/A
MSTRG.10858.1	Female	Male	-5.15084	0.940384	0.000209547	0.00590129	#N/A
MSTRG.7337.1	Female	Male	-5.14974	0.148621	0.0030107	0.0373947	#N/A
g15910.t1	Female	Male	-5.14941	-0.34952	0.0030724	0.0378274	#N/A
MSTRG.45871.1	Female	Male	-5.14921	1.03151	0.000247266	0.00666869	#N/A
MSTRG.43155.1	Female	Male	-5.14798	2.9714	0.000367894	0.00888324	#N/A
MSTRG.35744.3	Female	Male	-5.14694	0.653442	0.00287685	0.036237	#N/A
MSTRG.44201.1	Female	Male	-5.14467	1.01178	0.000773798	0.0152671	#N/A
MSTRG.27440.1	Female	Male	-5.14252	1.336	0.000171988	0.00510696	#N/A
MSTRG.30239.1	Female	Male	-5.14072	0.494182	0.00361543	0.0420005	#N/A
MSTRG.40968.1	Female	Male	-5.14051	0.41671	0.000513627	0.0115282	#N/A
MSTRG.31519.1	Female	Male	-5.13692	0.492926	0.00311764	0.0382962	#N/A
MSTRG.37439.1	Female	Male	-5.13562	1.42214	0.000345577	0.00856949	#N/A
MSTRG.11503.1	Female	Male	-5.13545	1.0175	0.000177103	0.00520683	#N/A
MSTRG.40495.1	Female	Male	-5.13495	1.03299	9.1446e-05	0.00319525	#N/A
MSTRG.47055.1	Female	Male	-5.13393	0.593429	0.0023744	0.0314946	#N/A
MSTRG.266.1	Female	Male	-5.13052	0.889782	0.000523634	0.0116744	#N/A
MSTRG.44223.3	Female	Male	-5.12763	0.61886	0.000136693	0.00428734	#N/A
MSTRG.21453.1	Female	Male	-5.12677	1.22872	0.000343031	0.00853717	#N/A
MSTRG.43333.1	Female	Male	-5.12629	1.65587	0.000155247	0.00472523	#N/A
MSTRG.45940.1	Female	Male	-5.12102	0.442145	0.000279545	0.00731079	#N/A
MSTRG.27630.1	Female	Male	-5.1166	3.04346	0.00216838	0.0296892	#N/A
MSTRG.35116.1	Female	Male	-5.11456	2.27656	0.000198399	0.00566684	#N/A
MSTRG.7050.1	Female	Male	-5.10944	1.75444	0.00222772	0.0302234	#N/A
MSTRG.6155.1	Female	Male	-5.10941	-0.115075	0.00319704	0.038812	#N/A
MSTRG.37387.1	Female	Male	-5.10837	2.16655	0.000665229	0.0136275	#N/A
MSTRG.33222.4	Female	Male	-5.10275	0.295425	0.00254387	0.0331186	#N/A
MSTRG.29701.2	Female	Male	-5.10206	0.704503	0.000802124	0.0156362	#N/A
MSTRG.44362.1	Female	Male	-5.1011	0.066415	0.000879522	0.016653	#N/A
g2914.t1	Female	Male	-5.10088	-0.00647833	0.000741715	0.0148088	#N/A
MSTRG.26895.1	Female	Male	-5.10026	1.99871	0.00101372	0.0183251	#N/A
MSTRG.47070.1	Female	Male	-5.09888	1.55241	0.00019868	0.00566684	#N/A
MSTRG.11238.1	Female	Male	-5.09713	2.19299	0.000246886	0.00666516	#N/A
MSTRG.38384.1	Female	Male	-5.09454	0.283694	0.00337239	0.0402071	#N/A
MSTRG.48407.1	Female	Male	-5.0934	1.19327	0.000791803	0.0154966	#N/A
MSTRG.18891.1	Female	Male	-5.09322	0.586301	0.00016688	0.00498293	#N/A
MSTRG.45320.5	Female	Male	-5.09132	0.379359	0.00097887	0.0178884	#N/A
MSTRG.32994.1	Female	Male	-5.08646	0.0865095	0.00386926	0.0440315	#N/A
MSTRG.6487.5	Female	Male	-5.08565	1.18285	0.000605232	0.0128206	#N/A
g15105.t2	Female	Male	-5.08329	0.169635	0.00253867	0.0330831	#N/A
MSTRG.32193.1	Female	Male	-5.08138	2.12718	0.000273831	0.00718287	#N/A
MSTRG.5267.1	Female	Male	-5.08008	-0.416952	0.00386024	0.0439866	#N/A
MSTRG.1003.2	Female	Male	-5.0794	1.36651	0.000261677	0.00696215	#N/A
g12504.t1	Female	Male	-5.07744	2.76216	0.000233468	0.00641952	#N/A
MSTRG.3559.1	Female	Male	-5.07424	0.837137	0.000701272	0.0141706	#N/A
MSTRG.44233.1	Female	Male	-5.07341	-0.308869	0.00328789	0.0395168	#N/A
MSTRG.6215.1	Female	Male	-5.07045	2.2195	0.000677796	0.0138004	#N/A
MSTRG.2838.1	Female	Male	-5.06932	1.63818	0.00278892	0.035497	#N/A
MSTRG.15589.2	Female	Male	-5.06792	0.562776	0.000357982	0.00873058	#N/A
MSTRG.12834.4	Female	Male	-5.0658	1.44313	0.000369165	0.0089059	#N/A
MSTRG.4707.1	Female	Male	-5.06459	-0.429862	0.00378699	0.0433534	#N/A
MSTRG.4156.1	Female	Male	-5.06165	1.06087	7.83285e-05	0.00287463	#N/A
MSTRG.2175.1	Female	Male	-5.06084	1.4354	0.000244501	0.00663425	#N/A
MSTRG.45516.1	Female	Male	-5.06068	0.154541	0.00320688	0.0388749	#N/A
MSTRG.50185.1	Female	Male	-5.05478	1.8782	0.000834218	0.0160682	#N/A
g13164.t1	Female	Male	-5.05197	0.0260712	0.000517382	0.011582	#N/A
MSTRG.37311.1	Female	Male	-5.04547	1.4242	0.000520629	0.0116171	#N/A
MSTRG.24304.2	Female	Male	-5.04507	0.95485	0.000286672	0.00746799	#N/A
MSTRG.43616.1	Female	Male	-5.04234	0.53852	0.000345236	0.00856949	#N/A
MSTRG.11035.1	Female	Male	-5.03793	0.651134	0.0013561	0.0220996	#N/A
g6702.t1	Female	Male	-5.03467	0.545546	0.00368076	0.0425194	#N/A
MSTRG.44361.1	Female	Male	-5.03411	1.40815	0.000180057	0.00527627	#N/A
MSTRG.271.1	Female	Male	-5.03313	0.127019	0.00319067	0.038812	#N/A
MSTRG.13789.1	Female	Male	-5.03153	2.05888	0.000180978	0.00529748	#N/A
MSTRG.26791.2	Female	Male	-5.02348	1.14848	0.00369207	0.0426133	#N/A
MSTRG.38742.4	Female	Male	-5.02038	0.215883	0.00319571	0.038812	#N/A
MSTRG.19932.1	Female	Male	-5.02005	1.42156	0.00205509	0.0287807	#N/A
g6860.t1	Female	Male	-5.01887	5.56659	0.00271159	0.0347109	#N/A
MSTRG.9884.1	Female	Male	-5.01857	0.626198	0.000984421	0.0179409	#N/A
MSTRG.30691.1	Female	Male	-5.01778	2.3818	0.000126041	0.00402398	#N/A
MSTRG.7046.1	Female	Male	-5.01708	2.44253	0.00209984	0.0292024	#N/A
MSTRG.33820.1	Female	Male	-5.01684	0.639195	0.000425557	0.00994055	#N/A
MSTRG.33810.1	Female	Male	-5.0164	1.95052	0.000283998	0.00741275	#N/A
MSTRG.18441.1	Female	Male	-5.01529	0.30741	0.00111257	0.0196102	#N/A
MSTRG.2725.1	Female	Male	-5.00747	1.96782	0.00128667	0.0213634	#N/A
MSTRG.12004.2	Female	Male	-5.00619	0.752677	0.00054712	0.0119981	#N/A
MSTRG.39061.1	Female	Male	-5.00505	1.20451	0.000225661	0.00626278	#N/A
g5002.t1	Female	Male	-5.00243	0.7617	0.000162041	0.00486558	#N/A
g6219.t1	Female	Male	-5.00194	0.358803	0.00435899	0.0478515	#N/A
MSTRG.11524.1	Female	Male	-5.0004	0.363946	0.003361	0.040125	#N/A
MSTRG.6054.1	Female	Male	-4.99432	0.0879427	0.00323946	0.0391012	#N/A
g10955.t1	Female	Male	-4.9924	0.123985	0.000527213	0.0117152	#N/A
MSTRG.31959.1	Female	Male	-4.99034	2.45156	0.000556884	0.0121129	#N/A
MSTRG.45327.1	Female	Male	-4.99011	0.861807	0.000273848	0.00718287	#N/A
MSTRG.28958.1	Female	Male	-4.98987	0.499995	0.00413434	0.0461838	#N/A
MSTRG.41404.1	Female	Male	-4.98922	1.36708	0.000220944	0.00616414	#N/A
MSTRG.589.1	Female	Male	-4.98822	0.119629	0.000499286	0.0113107	#N/A
MSTRG.860.1	Female	Male	-4.98683	0.275861	0.000886877	0.0167213	#N/A
MSTRG.24356.1	Female	Male	-4.98516	0.354575	0.000561672	0.0121774	#N/A
MSTRG.29128.1	Female	Male	-4.98512	1.99086	0.00134893	0.0220836	#N/A
MSTRG.39869.1	Female	Male	-4.98511	0.447549	0.000389811	0.00929501	#N/A
MSTRG.11290.2	Female	Male	-4.9839	2.90443	0.000625927	0.0130994	#N/A
MSTRG.507.2	Female	Male	-4.9822	2.13463	0.000796619	0.0155567	#N/A
MSTRG.24854.1	Female	Male	-4.97904	1.81605	0.00139189	0.0224623	#N/A
MSTRG.48188.1	Female	Male	-4.97357	1.90493	0.000530626	0.0117561	#N/A
MSTRG.4063.1	Female	Male	-4.97206	1.67017	0.00208808	0.029096	#N/A
MSTRG.13591.1	Female	Male	-4.97153	1.56939	0.000807499	0.0156777	#N/A
MSTRG.36978.1	Female	Male	-4.96875	1.80497	0.00124571	0.0209476	#N/A
g8967.t1	Female	Male	-4.96696	0.729452	0.000241609	0.00657001	#N/A
MSTRG.17977.1	Female	Male	-4.96664	0.331112	0.00410308	0.045942	#N/A
MSTRG.7051.1	Female	Male	-4.96637	2.51352	0.00188834	0.0272115	#N/A
MSTRG.22240.1	Female	Male	-4.96607	-0.405407	0.00442335	0.0483955	#N/A
MSTRG.36574.3	Female	Male	-4.96463	2.59381	0.00348395	0.0410435	#N/A
MSTRG.34305.1	Female	Male	-4.96263	1.2576	0.000401597	0.00952511	#N/A
g16369.t1	Female	Male	-4.96119	1.42687	0.000691435	0.0140141	#N/A
MSTRG.47228.1	Female	Male	-4.96115	0.955169	0.000841552	0.0161481	#N/A
MSTRG.9772.1	Female	Male	-4.95588	0.153958	0.00373406	0.0428943	#N/A
g8655.t2	Female	Male	-4.95574	1.33428	0.000108918	0.00361091	#N/A
MSTRG.1535.1	Female	Male	-4.9553	-0.140022	0.00135068	0.0220836	#N/A
MSTRG.21233.1	Female	Male	-4.95323	0.482519	0.000417893	0.00979992	#N/A
MSTRG.43272.4	Female	Male	-4.94651	2.1009	0.000964933	0.0177063	#N/A
MSTRG.41008.1	Female	Male	-4.94597	0.842114	0.00302806	0.0375349	#N/A
MSTRG.32199.2	Female	Male	-4.94468	0.950416	0.000270409	0.00713807	#N/A
MSTRG.6550.1	Female	Male	-4.94344	1.23809	0.000293801	0.00759231	#N/A
MSTRG.45311.1	Female	Male	-4.93954	4.49538	0.0044053	0.0482833	#N/A
MSTRG.22625.1	Female	Male	-4.93702	0.736863	0.000338831	0.00845258	#N/A
g3505.t1	Female	Male	-4.93074	0.0664715	0.000627946	0.0131232	#N/A
MSTRG.23119.1	Female	Male	-4.92969	1.42719	0.0034049	0.0404146	#N/A
MSTRG.27065.1	Female	Male	-4.92741	1.99603	0.00145727	0.0231795	#N/A
MSTRG.40901.1	Female	Male	-4.92359	1.21954	0.000526495	0.0117089	#N/A
MSTRG.45941.1	Female	Male	-4.92197	0.218236	0.00120985	0.0205813	#N/A
MSTRG.13882.1	Female	Male	-4.91993	0.544946	0.000359182	0.00874391	#N/A
MSTRG.4048.1	Female	Male	-4.91819	1.32097	0.00189842	0.0272899	#N/A
MSTRG.30198.1	Female	Male	-4.91647	0.419441	0.000291045	0.0075525	#N/A
g6667.t1	Female	Male	-4.91415	0.280445	0.00424981	0.0470273	#N/A
MSTRG.30142.1	Female	Male	-4.90958	0.801712	0.00235675	0.0313683	#N/A
MSTRG.48942.1	Female	Male	-4.90946	0.533954	0.000334443	0.00841016	#N/A
MSTRG.31908.2	Female	Male	-4.90887	1.60429	0.00104558	0.0186987	#N/A
MSTRG.254.1	Female	Male	-4.90629	1.835	0.00184628	0.0268307	#N/A
MSTRG.47258.2	Female	Male	-4.90327	0.27162	0.00423473	0.0469523	#N/A
MSTRG.44059.1	Female	Male	-4.89881	1.29314	0.00141396	0.022715	#N/A
MSTRG.33781.3	Female	Male	-4.89763	0.670948	0.00406817	0.0456543	#N/A
MSTRG.47717.2	Female	Male	-4.89355	0.662652	0.00050919	0.0114671	#N/A
MSTRG.33801.1	Female	Male	-4.89244	0.887477	0.000270495	0.00713807	#N/A
MSTRG.35250.3	Female	Male	-4.89238	1.65822	0.000914172	0.0170675	#N/A
g16466.t1	Female	Male	-4.88848	0.908842	0.000174208	0.00514433	#N/A
MSTRG.47642.1	Female	Male	-4.88697	1.79962	0.00238335	0.0315352	#N/A
MSTRG.4756.2	Female	Male	-4.88567	0.186577	0.00147843	0.0232807	#N/A
MSTRG.27920.2	Female	Male	-4.882	0.656536	0.00422125	0.0468223	#N/A
MSTRG.43668.1	Female	Male	-4.88053	0.631468	0.000599058	0.0127099	#N/A
MSTRG.2764.1	Female	Male	-4.87979	0.649373	0.000495122	0.0112545	#N/A
MSTRG.37563.1	Female	Male	-4.8796	1.33137	0.00143844	0.0229907	#N/A
MSTRG.28803.1	Female	Male	-4.87915	2.60229	0.00127554	0.0212804	#N/A
MSTRG.41230.1	Female	Male	-4.87658	2.06299	0.00164864	0.0250327	#N/A
MSTRG.47353.1	Female	Male	-4.87342	0.629347	0.000849719	0.0162614	#N/A
MSTRG.7805.1	Female	Male	-4.87306	0.770201	0.000638126	0.0132963	#N/A
MSTRG.26962.7	Female	Male	-4.87006	0.483997	0.0011883	0.0203403	#N/A
MSTRG.33034.1	Female	Male	-4.86974	0.63148	0.0012839	0.0213616	#N/A
MSTRG.4219.1	Female	Male	-4.86914	2.23286	0.000335727	0.00841016	#N/A
MSTRG.4259.1	Female	Male	-4.86861	0.873779	0.000790205	0.0154767	#N/A
MSTRG.33360.1	Female	Male	-4.86842	2.19762	0.000209535	0.00590129	#N/A
MSTRG.4967.1	Female	Male	-4.86777	1.27747	0.00280348	0.0355976	#N/A
MSTRG.16865.2	Female	Male	-4.86705	1.36247	0.00283294	0.0358526	#N/A
g373.t1	Female	Male	-4.86674	0.496526	0.000510795	0.0114935	#N/A
MSTRG.22210.1	Female	Male	-4.86166	0.197905	0.00047284	0.0108123	#N/A
MSTRG.37533.1	Female	Male	-4.86104	0.751228	0.00116471	0.0201015	#N/A
MSTRG.32733.1	Female	Male	-4.86067	1.24442	0.000260838	0.00695066	#N/A
MSTRG.6850.1	Female	Male	-4.85859	0.874016	0.00111834	0.0196712	#N/A
g1929.t1	Female	Male	-4.85761	1.31436	0.000771092	0.0152474	#N/A
MSTRG.14790.1	Female	Male	-4.85566	2.02219	0.00116609	0.0201015	#N/A
MSTRG.41274.1	Female	Male	-4.848	0.859171	0.000467286	0.0107219	#N/A
MSTRG.41396.1	Female	Male	-4.84597	1.1738	0.00402622	0.0452784	#N/A
MSTRG.18188.1	Female	Male	-4.84313	1.61654	0.00184861	0.02685	#N/A
MSTRG.12327.1	Female	Male	-4.84153	2.67471	0.000425801	0.00994055	#N/A
MSTRG.32570.1	Female	Male	-4.83936	1.3045	0.00030419	0.00781777	#N/A
MSTRG.30063.1	Female	Male	-4.83893	1.52625	0.000439795	0.0102138	#N/A
MSTRG.49844.1	Female	Male	-4.834	2.38691	0.00248745	0.0325424	#N/A
MSTRG.6622.1	Female	Male	-4.83302	1.13457	0.000439064	0.0102057	#N/A
MSTRG.32168.1	Female	Male	-4.83221	3.10307	0.00141829	0.0227625	#N/A
MSTRG.27522.1	Female	Male	-4.83215	0.305829	0.000670711	0.0136874	#N/A
MSTRG.46042.1	Female	Male	-4.83022	1.59183	0.000871573	0.0165729	#N/A
MSTRG.7827.3	Female	Male	-4.82792	1.36862	0.000139581	0.00434226	#N/A
MSTRG.36205.1	Female	Male	-4.82428	0.453916	0.00040867	0.0096331	#N/A
MSTRG.25763.7	Female	Male	-4.823	0.599332	0.00435116	0.047827	#N/A
MSTRG.11335.1	Female	Male	-4.82134	1.31189	0.00263989	0.0340373	#N/A
g9118.t1	Female	Male	-4.81742	1.1145	0.000317623	0.00809303	#N/A
MSTRG.48202.1	Female	Male	-4.81549	0.924594	0.000315154	0.00803778	#N/A
MSTRG.18991.1	Female	Male	-4.81412	1.1143	0.000266832	0.00708216	#N/A
MSTRG.26837.1	Female	Male	-4.81313	1.11849	0.000915569	0.0170698	#N/A
MSTRG.26044.1	Female	Male	-4.81205	0.151711	0.000568303	0.0122124	#N/A
MSTRG.26968.1	Female	Male	-4.80928	3.10112	0.000209834	0.00590316	#N/A
MSTRG.4326.1	Female	Male	-4.80398	1.20819	0.00171289	0.0255729	#N/A
g9869.t1	Female	Male	-4.80275	0.424561	0.00162011	0.0247824	#N/A
MSTRG.49856.1	Female	Male	-4.80205	1.2818	0.00104118	0.018645	#N/A
MSTRG.34789.1	Female	Male	-4.80085	1.55284	0.000239838	0.00654091	#N/A
g14766.t1	Female	Male	-4.79991	1.10348	0.00108248	0.0192048	#N/A
MSTRG.48714.1	Female	Male	-4.79733	4.19785	0.00234978	0.0313078	#N/A
MSTRG.13477.1	Female	Male	-4.79601	0.809752	0.000417945	0.00979992	#N/A
MSTRG.41072.1	Female	Male	-4.79504	0.274063	0.000903641	0.0169011	#N/A
MSTRG.24251.1	Female	Male	-4.79499	0.454916	0.000332144	0.00837822	#N/A
MSTRG.1816.1	Female	Male	-4.79499	1.34296	0.00110285	0.0195014	#N/A
g11278.t1	Female	Male	-4.79403	1.46159	0.000796601	0.0155567	#N/A
MSTRG.23117.1	Female	Male	-4.79387	1.69676	0.00152468	0.0237711	#N/A
MSTRG.36361.1	Female	Male	-4.78986	-0.0630935	0.00104057	0.018645	#N/A
g295.t1	Female	Male	-4.78913	2.24061	0.000220954	0.00616414	#N/A
MSTRG.18832.2	Female	Male	-4.78802	1.65243	0.0043111	0.0474842	#N/A
MSTRG.43033.2	Female	Male	-4.78801	1.25432	0.000408431	0.0096331	#N/A
MSTRG.41236.4	Female	Male	-4.78783	1.01515	0.00314047	0.0384884	#N/A
MSTRG.32644.2	Female	Male	-4.78776	0.905734	0.00176886	0.0261027	#N/A
MSTRG.50139.1	Female	Male	-4.78438	1.82548	0.00442964	0.0483955	#N/A
MSTRG.24524.1	Female	Male	-4.78338	1.61316	0.000646577	0.0134201	#N/A
MSTRG.27562.1	Female	Male	-4.77725	1.46917	0.000746871	0.0148896	#N/A
g15495.t1	Female	Male	-4.77412	0.659655	0.00054505	0.011967	#N/A
MSTRG.47244.1	Female	Male	-4.76781	1.2411	0.000652054	0.013486	#N/A
g9145.t2	Female	Male	-4.7668	1.07302	0.000239616	0.00654091	#N/A
g14310.t1	Female	Male	-4.76633	2.19588	0.000426233	0.00994196	#N/A
MSTRG.28518.1	Female	Male	-4.75771	0.974873	0.000236674	0.00649432	#N/A
MSTRG.50171.1	Female	Male	-4.75649	0.870727	0.00118296	0.0202748	#N/A
MSTRG.49862.1	Female	Male	-4.75308	1.72251	0.00180897	0.0264899	#N/A
MSTRG.5999.2	Female	Male	-4.7517	1.33275	0.00371603	0.0427721	#N/A
MSTRG.39392.1	Female	Male	-4.75013	1.08179	0.00433616	0.047721	#N/A
MSTRG.5023.2	Female	Male	-4.74647	1.13609	0.000345611	0.00856949	#N/A
MSTRG.33435.1	Female	Male	-4.74493	1.75316	0.000619101	0.0130362	#N/A
g3492.t1	Female	Male	-4.7447	0.97536	0.00357539	0.0415896	#N/A
MSTRG.19489.1	Female	Male	-4.74113	0.862297	0.00070683	0.0142506	#N/A
g12251.t1	Female	Male	-4.73933	0.6432	0.00343122	0.0406549	#N/A
MSTRG.37531.2	Female	Male	-4.73797	0.745252	0.00140514	0.0226191	#N/A
g8969.t1	Female	Male	-4.73473	1.12241	0.000301287	0.0077506	#N/A
MSTRG.653.1	Female	Male	-4.73356	0.218332	0.00139792	0.0225165	#N/A
MSTRG.25436.1	Female	Male	-4.73213	0.742868	0.00172644	0.0256777	#N/A
MSTRG.7533.1	Female	Male	-4.73159	-0.117378	0.00120368	0.0205117	#N/A
g11683.t1	Female	Male	-4.73031	0.211868	0.000918041	0.0171039	#N/A
g4630.t1	Female	Male	-4.7286	0.631133	0.000309126	0.00792018	#N/A
MSTRG.20111.1	Female	Male	-4.72257	0.208453	0.00122311	0.0207105	#N/A
MSTRG.19809.1	Female	Male	-4.71766	1.72719	0.000655215	0.013486	#N/A
MSTRG.37320.1	Female	Male	-4.71394	1.47997	0.000884195	0.0166825	#N/A
MSTRG.42726.1	Female	Male	-4.71147	2.44432	0.00258081	0.0335342	#N/A
MSTRG.6343.1	Female	Male	-4.71052	2.35397	0.00270461	0.0346547	#N/A
MSTRG.43364.1	Female	Male	-4.70773	1.66328	0.000684568	0.0138855	#N/A
MSTRG.32694.1	Female	Male	-4.70436	1.26052	0.000713469	0.0143412	#N/A
MSTRG.37657.1	Female	Male	-4.70427	0.59855	0.000980919	0.0179136	#N/A
MSTRG.2982.1	Female	Male	-4.70348	0.927121	0.00212982	0.0293716	#N/A
g3698.t1	Female	Male	-4.70101	0.824415	0.000566463	0.0121907	#N/A
MSTRG.30659.1	Female	Male	-4.70023	2.48113	0.000881201	0.016673	#N/A
MSTRG.37163.1	Female	Male	-4.69945	0.478188	0.000653502	0.013486	#N/A
MSTRG.36702.1	Female	Male	-4.69849	1.6107	0.00301267	0.0374019	#N/A
MSTRG.7045.1	Female	Male	-4.69729	1.02273	0.00304477	0.0376954	#N/A
MSTRG.18554.1	Female	Male	-4.69726	0.817082	0.00152288	0.0237569	#N/A
MSTRG.50290.1	Female	Male	-4.69705	1.09024	0.000656321	0.0134967	#N/A
MSTRG.32225.1	Female	Male	-4.69636	1.79145	0.00427919	0.0472105	#N/A
MSTRG.25091.1	Female	Male	-4.69504	1.08528	0.00035832	0.00873086	#N/A
MSTRG.10328.2	Female	Male	-4.69475	0.211055	0.000705646	0.0142374	#N/A
MSTRG.30166.1	Female	Male	-4.69368	1.31295	0.000227286	0.00628184	#N/A
MSTRG.42769.1	Female	Male	-4.69356	1.08446	0.00114003	0.0198958	#N/A
g16526.t1	Female	Male	-4.69285	1.24073	0.000196184	0.00564279	#N/A
g11248.t1	Female	Male	-4.69101	0.703247	0.000750126	0.0149315	#N/A
MSTRG.6398.1	Female	Male	-4.68783	0.173665	0.00111437	0.0196273	#N/A
MSTRG.27365.1	Female	Male	-4.68554	0.327091	0.000804911	0.0156727	#N/A
g3159.t1	Female	Male	-4.68335	1.782	0.000392711	0.0093392	#N/A
g11533.t1	Female	Male	-4.68259	2.4145	0.00194972	0.0277722	#N/A
MSTRG.6078.1	Female	Male	-4.68022	0.801123	0.0016522	0.0250726	#N/A
g8546.t1	Female	Male	-4.67914	0.992935	0.00129935	0.021485	#N/A
MSTRG.19879.1	Female	Male	-4.67707	0.578316	0.00281107	0.0356316	#N/A
g6202.t1	Female	Male	-4.6741	0.358114	0.00100893	0.0182631	#N/A
MSTRG.7828.1	Female	Male	-4.66916	0.890883	0.000408253	0.0096331	#N/A
MSTRG.2461.1	Female	Male	-4.6608	0.568934	0.000611103	0.0129245	#N/A
MSTRG.4843.1	Female	Male	-4.6592	0.879646	0.00122295	0.0207105	#N/A
MSTRG.43419.2	Female	Male	-4.65889	1.48895	0.000888424	0.0167331	#N/A
MSTRG.30713.1	Female	Male	-4.65723	0.686181	0.000883368	0.0166825	#N/A
g3703.t1	Female	Male	-4.65721	0.301415	0.000937648	0.0173604	#N/A
MSTRG.6362.1	Female	Male	-4.65716	0.872118	0.00192284	0.0275049	#N/A
MSTRG.32304.1	Female	Male	-4.657	0.288639	0.00227876	0.0306208	#N/A
MSTRG.11056.1	Female	Male	-4.65303	0.774899	0.000878241	0.0166524	#N/A
MSTRG.44319.1	Female	Male	-4.65249	1.83163	0.00279924	0.0355945	#N/A
MSTRG.5714.1	Female	Male	-4.65049	0.958526	0.000244854	0.00663711	#N/A
MSTRG.24732.1	Female	Male	-4.64831	0.280578	0.00226319	0.0305265	#N/A
MSTRG.2445.1	Female	Male	-4.6481	0.65743	0.00135795	0.0220996	#N/A
MSTRG.41019.1	Female	Male	-4.64673	0.283097	0.00266051	0.0342356	#N/A
MSTRG.24071.3	Female	Male	-4.64508	0.862131	0.000360427	0.00875963	#N/A
g10529.t1	Female	Male	-4.64261	1.52713	0.00153979	0.0239369	#N/A
MSTRG.41315.1	Female	Male	-4.64193	0.131805	0.00139288	0.0224623	#N/A
MSTRG.33805.1	Female	Male	-4.64139	-0.0401614	0.00249792	0.0326635	#N/A
MSTRG.18380.1	Female	Male	-4.64082	3.904	0.00126263	0.0211604	#N/A
MSTRG.14573.1	Female	Male	-4.6389	0.953917	0.000405908	0.00960183	#N/A
MSTRG.21938.1	Female	Male	-4.63794	3.77844	0.00169517	0.0254279	#N/A
MSTRG.32214.1	Female	Male	-4.63481	0.53018	0.000837877	0.0160923	#N/A
MSTRG.46994.1	Female	Male	-4.63339	-0.43303	0.003029	0.0375349	#N/A
MSTRG.4553.1	Female	Male	-4.63124	2.0186	0.000353365	0.00865743	#N/A
MSTRG.10797.1	Female	Male	-4.63092	0.762318	0.00319512	0.038812	#N/A
MSTRG.27950.1	Female	Male	-4.6296	0.853737	0.00192122	0.0275015	#N/A
MSTRG.46284.1	Female	Male	-4.62816	1.76392	0.00148034	0.0232833	#N/A
MSTRG.18442.2	Female	Male	-4.62804	0.530619	0.00157518	0.0243176	#N/A
MSTRG.3925.1	Female	Male	-4.62466	2.27567	0.000667885	0.013653	#N/A
MSTRG.30870.5	Female	Male	-4.62262	0.758466	0.00040756	0.00963238	#N/A
MSTRG.39819.1	Female	Male	-4.62008	0.403262	0.000556193	0.0121106	#N/A
MSTRG.30066.1	Female	Male	-4.61837	1.09973	0.000889765	0.0167403	#N/A
MSTRG.5810.1	Female	Male	-4.61692	1.31369	0.00045798	0.0105355	#N/A
g15858.t2	Female	Male	-4.61508	1.36823	0.000716116	0.014362	#N/A
MSTRG.42535.1	Female	Male	-4.61344	1.85929	0.00304874	0.0377102	#N/A
MSTRG.24743.1	Female	Male	-4.61195	1.01074	0.00040541	0.00959854	#N/A
MSTRG.49699.1	Female	Male	-4.61069	0.511613	0.00126469	0.0211604	#N/A
MSTRG.41063.1	Female	Male	-4.61061	0.102939	0.0014091	0.0226694	#N/A
MSTRG.31758.1	Female	Male	-4.60865	1.31074	0.001441	0.0230028	#N/A
MSTRG.50422.1	Female	Male	-4.60796	0.509052	0.00127892	0.0213052	#N/A
MSTRG.26964.1	Female	Male	-4.60765	1.98202	0.00123381	0.0208129	#N/A
g10417.t1	Female	Male	-4.60574	0.248261	0.00334856	0.0400123	#N/A
MSTRG.505.1	Female	Male	-4.60517	0.830825	0.00202991	0.0285532	#N/A
MSTRG.23991.1	Female	Male	-4.59919	2.48457	0.00272048	0.0347915	#N/A
g13773.t1	Female	Male	-4.59894	0.386677	0.00106511	0.0189721	#N/A
MSTRG.30211.1	Female	Male	-4.5975	1.81851	0.0008983	0.0168352	#N/A
MSTRG.11166.1	Female	Male	-4.59256	2.23535	0.00098187	0.0179188	#N/A
MSTRG.47245.1	Female	Male	-4.59244	1.95093	0.000835256	0.0160734	#N/A
MSTRG.6506.1	Female	Male	-4.58785	1.07704	0.00192351	0.0275049	#N/A
g1090.t1	Female	Male	-4.58781	0.811744	0.00179427	0.0263903	#N/A
MSTRG.49157.1	Female	Male	-4.58382	1.99963	0.000349028	0.0086245	#N/A
MSTRG.16955.1	Female	Male	-4.58367	1.7585	0.000960714	0.0176727	#N/A
MSTRG.37291.1	Female	Male	-4.58267	2.01174	0.000354851	0.00867797	#N/A
g13627.t1	Female	Male	-4.58065	1.33068	0.000699976	0.0141551	#N/A
MSTRG.37493.1	Female	Male	-4.5805	0.895725	0.0010478	0.0187259	#N/A
MSTRG.49283.1	Female	Male	-4.57982	2.06109	0.00345805	0.0408823	#N/A
MSTRG.6423.1	Female	Male	-4.57944	1.08317	0.00391525	0.0444415	#N/A
MSTRG.9615.1	Female	Male	-4.57904	3.41762	0.000960613	0.0176727	#N/A
g7500.t1	Female	Male	-4.57882	2.00157	0.000388452	0.00927088	#N/A
g11279.t2	Female	Male	-4.57877	1.60666	0.000635697	0.013256	#N/A
MSTRG.38988.1	Female	Male	-4.57756	1.31156	0.00366692	0.0424512	#N/A
MSTRG.36548.1	Female	Male	-4.57478	0.705724	0.000430285	0.0100277	#N/A
MSTRG.4448.14	Female	Male	-4.57441	1.1253	0.000827846	0.0159841	#N/A
MSTRG.42244.1	Female	Male	-4.5703	1.5183	0.00061489	0.012984	#N/A
MSTRG.6057.1	Female	Male	-4.56991	0.88752	0.000309655	0.00792018	#N/A
MSTRG.24467.1	Female	Male	-4.56896	0.0672271	0.00187541	0.0271068	#N/A
MSTRG.2650.2	Female	Male	-4.56611	0.875427	0.000436074	0.0101538	#N/A
g853.t1	Female	Male	-4.56581	0.0624166	0.00167479	0.0252887	#N/A
MSTRG.18993.1	Female	Male	-4.56216	1.24011	0.00158996	0.0244716	#N/A
g9905.t1	Female	Male	-4.56082	0.960722	0.000524367	0.011675	#N/A
MSTRG.30158.17	Female	Male	-4.55942	1.37889	0.000246233	0.00666014	#N/A
MSTRG.49355.1	Female	Male	-4.55777	0.782505	0.00122929	0.0207629	#N/A
MSTRG.39071.1	Female	Male	-4.5565	0.880314	0.00203962	0.0286335	#N/A
MSTRG.22356.1	Female	Male	-4.55647	1.6998	0.00239484	0.0315934	#N/A
MSTRG.20772.1	Female	Male	-4.5543	2.81552	0.00316051	0.0386101	#N/A
MSTRG.46068.3	Female	Male	-4.55334	1.31433	0.000274496	0.00719281	#N/A
g13789.t1	Female	Male	-4.55116	0.201259	0.00100439	0.0181933	#N/A
g11276.t1	Female	Male	-4.5467	1.23705	0.000489289	0.0111693	#N/A
MSTRG.16959.1	Female	Male	-4.54611	1.83479	0.000709306	0.0142897	#N/A
MSTRG.29561.1	Female	Male	-4.54526	1.49395	0.000536897	0.0118614	#N/A
MSTRG.29807.1	Female	Male	-4.5451	-0.0583277	0.00173951	0.0258119	#N/A
MSTRG.35014.1	Female	Male	-4.54475	1.73744	0.0040733	0.0456927	#N/A
g7767.t1	Female	Male	-4.54395	0.768728	0.00116055	0.0200967	#N/A
MSTRG.37843.1	Female	Male	-4.54234	0.454515	0.00392777	0.044508	#N/A
MSTRG.33134.1	Female	Male	-4.54041	1.25881	0.00175401	0.0259695	#N/A
MSTRG.20686.1	Female	Male	-4.53721	0.766316	0.000944932	0.0174267	#N/A
MSTRG.37398.1	Female	Male	-4.53449	1.17855	0.00175899	0.0260143	#N/A
MSTRG.34676.1	Female	Male	-4.53254	0.0323769	0.00188931	0.0272115	#N/A
MSTRG.6109.1	Female	Male	-4.53139	0.0315493	0.00191719	0.0274586	#N/A
MSTRG.36574.22	Female	Male	-4.52586	2.33786	0.000668249	0.013653	#N/A
MSTRG.25008.1	Female	Male	-4.52517	0.345237	0.00121141	0.0205813	#N/A
MSTRG.25116.1	Female	Male	-4.52446	2.08404	0.000660349	0.0135587	#N/A
MSTRG.38651.1	Female	Male	-4.52343	1.12889	0.00211084	0.0292305	#N/A
MSTRG.2787.1	Female	Male	-4.52238	0.200195	0.000828728	0.0159854	#N/A
MSTRG.15347.2	Female	Male	-4.52102	1.81791	0.00215911	0.0296229	#N/A
MSTRG.17515.1	Female	Male	-4.51786	0.0187889	0.00195966	0.0278432	#N/A
MSTRG.33297.1	Female	Male	-4.51651	-0.263848	0.00210258	0.0292116	#N/A
MSTRG.18268.3	Female	Male	-4.51351	0.0689194	0.00134714	0.0220836	#N/A
MSTRG.40844.4	Female	Male	-4.51232	-0.125616	0.00229954	0.0307803	#N/A
g13824.t1	Female	Male	-4.51077	0.645426	0.00046458	0.010669	#N/A
MSTRG.45915.4	Female	Male	-4.51061	0.817472	0.00320403	0.0388749	#N/A
MSTRG.21472.1	Female	Male	-4.50948	0.539769	0.000363935	0.0088195	#N/A
g1737.t1	Female	Male	-4.50914	0.652266	0.000493635	0.0112304	#N/A
MSTRG.16957.1	Female	Male	-4.50821	2.60455	0.000527692	0.0117161	#N/A
MSTRG.50420.1	Female	Male	-4.50445	1.51135	0.000891569	0.0167625	#N/A
MSTRG.16728.1	Female	Male	-4.50379	1.41912	0.00194269	0.0277051	#N/A
MSTRG.18145.1	Female	Male	-4.50346	1.30447	0.00365652	0.042369	#N/A
MSTRG.3286.1	Female	Male	-4.50275	1.67708	0.00176544	0.0260665	#N/A
MSTRG.39092.1	Female	Male	-4.50161	1.26698	0.0017706	0.0261139	#N/A
MSTRG.24460.1	Female	Male	-4.50138	0.521609	0.000853477	0.0163216	#N/A
MSTRG.21304.1	Female	Male	-4.49952	3.18852	0.00172397	0.0256777	#N/A
MSTRG.9647.1	Female	Male	-4.49709	0.411906	0.00414676	0.0462646	#N/A
MSTRG.10094.2	Female	Male	-4.49706	0.00406984	0.00356181	0.0414958	#N/A
MSTRG.33197.1	Female	Male	-4.4946	1.04814	0.000649987	0.01346	#N/A
MSTRG.4280.1	Female	Male	-4.49447	1.22017	0.00286886	0.0362045	#N/A
MSTRG.3411.1	Female	Male	-4.48916	1.19562	0.00107188	0.0190418	#N/A
g12962.t1	Female	Male	-4.48649	0.166716	0.00116989	0.0201411	#N/A
g413.t1	Female	Male	-4.48367	-0.151717	0.00183718	0.0267421	#N/A
MSTRG.40740.2	Female	Male	-4.48206	2.69759	0.00083155	0.0160283	#N/A
MSTRG.6134.1	Female	Male	-4.47895	1.05539	0.00220861	0.0300861	#N/A
MSTRG.11074.1	Female	Male	-4.47804	0.796253	0.00084958	0.0162614	#N/A
MSTRG.41412.1	Female	Male	-4.47697	1.42489	0.000928657	0.0172537	#N/A
g7325.t1	Female	Male	-4.47642	1.30875	0.000786719	0.0154423	#N/A
MSTRG.16768.1	Female	Male	-4.47523	1.3931	0.00224735	0.0304125	#N/A
MSTRG.1720.1	Female	Male	-4.47449	2.31474	0.000594662	0.0126669	#N/A
g4386.t1	Female	Male	-4.47322	0.411124	0.00146112	0.0231882	#N/A
MSTRG.14892.1	Female	Male	-4.47169	2.68914	0.00156684	0.0242588	#N/A
MSTRG.40882.1	Female	Male	-4.47016	0.957573	0.00106077	0.0189073	#N/A
MSTRG.3234.1	Female	Male	-4.46999	0.703338	0.00116175	0.0201015	#N/A
MSTRG.14610.1	Female	Male	-4.46858	1.05574	0.00341089	0.0404678	#N/A
MSTRG.43378.1	Female	Male	-4.46673	1.64242	0.00166887	0.0252826	#N/A
MSTRG.28885.1	Female	Male	-4.46528	1.29318	0.000562379	0.012178	#N/A
MSTRG.41237.1	Female	Male	-4.46319	1.25191	0.0021731	0.0297235	#N/A
MSTRG.6285.2	Female	Male	-4.46112	1.29317	0.00051742	0.011582	#N/A
MSTRG.37785.1	Female	Male	-4.46105	1.40409	0.0004374	0.0101758	#N/A
g13420.t1	Female	Male	-4.46082	0.588213	0.00142212	0.0227829	#N/A
MSTRG.41618.1	Female	Male	-4.45843	1.67133	0.00111003	0.0195895	#N/A
MSTRG.26839.1	Female	Male	-4.45732	1.73879	0.0013043	0.0215269	#N/A
MSTRG.14203.1	Female	Male	-4.45723	0.282868	0.00135799	0.0220996	#N/A
MSTRG.10120.1	Female	Male	-4.45238	1.38625	0.00441509	0.0483444	#N/A
MSTRG.46805.1	Female	Male	-4.45177	0.0113135	0.00149937	0.023486	#N/A
MSTRG.30311.1	Female	Male	-4.4482	0.678053	0.000654503	0.013486	#N/A
g2434.t1	Female	Male	-4.44683	0.682241	0.000655299	0.013486	#N/A
MSTRG.9473.1	Female	Male	-4.44656	1.4732	0.00166146	0.0251846	#N/A
MSTRG.3244.1	Female	Male	-4.44434	1.15329	0.00112431	0.0197374	#N/A
MSTRG.8835.1	Female	Male	-4.43916	1.06947	0.000595954	0.0126742	#N/A
MSTRG.27160.1	Female	Male	-4.43861	0.236544	0.00123571	0.0208318	#N/A
g8576.t1	Female	Male	-4.43831	0.674222	0.000714322	0.0143476	#N/A
MSTRG.960.1	Female	Male	-4.43649	0.674213	0.00300158	0.0373431	#N/A
MSTRG.28699.1	Female	Male	-4.43434	1.00088	0.00134376	0.0220828	#N/A
MSTRG.23314.3	Female	Male	-4.43185	0.667078	0.00260332	0.0337612	#N/A
g12512.t1	Female	Male	-4.43102	0.456871	0.00237952	0.0315	#N/A
MSTRG.43871.1	Female	Male	-4.42899	2.208	0.000632399	0.0131975	#N/A
MSTRG.48718.1	Female	Male	-4.42831	1.20322	0.001288	0.0213634	#N/A
MSTRG.45374.1	Female	Male	-4.42765	0.919325	0.00114795	0.019995	#N/A
MSTRG.36500.1	Female	Male	-4.42446	0.988851	0.000623164	0.0130762	#N/A
MSTRG.39423.2	Female	Male	-4.42344	1.2246	0.0029877	0.0371954	#N/A
MSTRG.28738.1	Female	Male	-4.42278	1.58487	0.00396182	0.0447801	#N/A
MSTRG.4016.1	Female	Male	-4.42271	2.50779	0.00120343	0.0205117	#N/A
MSTRG.4599.1	Female	Male	-4.41831	0.743151	0.00117453	0.0201954	#N/A
MSTRG.3893.1	Female	Male	-4.4182	0.910178	0.00112924	0.019785	#N/A
MSTRG.34906.1	Female	Male	-4.41792	0.552949	0.00220846	0.0300861	#N/A
MSTRG.4043.1	Female	Male	-4.41588	0.838318	0.00266372	0.0342356	#N/A
MSTRG.48213.4	Female	Male	-4.4155	2.25695	0.00221971	0.0301912	#N/A
MSTRG.39230.1	Female	Male	-4.41487	0.647946	0.000903407	0.0169011	#N/A
g11647.t1	Female	Male	-4.41443	0.651549	0.00115431	0.0200411	#N/A
g7726.t1	Female	Male	-4.41349	0.824082	0.000550927	0.0120362	#N/A
g7900.t1	Female	Male	-4.41214	0.335694	0.000677257	0.0138	#N/A
MSTRG.20036.1	Female	Male	-4.41199	-0.0498843	0.00164178	0.0250242	#N/A
MSTRG.15182.1	Female	Male	-4.41182	0.544111	0.000597687	0.0126909	#N/A
g16477.t1	Female	Male	-4.40932	1.07454	0.00396724	0.0448033	#N/A
MSTRG.28421.1	Female	Male	-4.40819	0.726196	0.0023788	0.0315	#N/A
MSTRG.11355.1	Female	Male	-4.40467	1.76469	0.00101966	0.0183952	#N/A
MSTRG.8002.1	Female	Male	-4.40388	0.341284	0.00118293	0.0202748	#N/A
MSTRG.20789.1	Female	Male	-4.40364	1.75777	0.00167081	0.0252852	#N/A
MSTRG.10116.1	Female	Male	-4.4025	1.50979	0.000547607	0.0119989	#N/A
MSTRG.4953.2	Female	Male	-4.40115	0.428266	0.0010683	0.0189947	#N/A
MSTRG.47314.1	Female	Male	-4.39629	1.23182	0.000518279	0.011582	#N/A
g8057.t1	Female	Male	-4.39504	0.640389	0.00418358	0.0465976	#N/A
MSTRG.23227.4	Female	Male	-4.39471	0.809783	0.00167801	0.025292	#N/A
MSTRG.29270.1	Female	Male	-4.39104	-0.0956459	0.00292154	0.0366274	#N/A
MSTRG.30435.1	Female	Male	-4.38751	0.420115	0.00146059	0.0231882	#N/A
MSTRG.27107.1	Female	Male	-4.38493	1.4433	0.000559672	0.0121439	#N/A
g1586.t1	Female	Male	-4.38413	2.14248	0.0014458	0.0230381	#N/A
MSTRG.21262.4	Female	Male	-4.38397	0.874689	0.000961408	0.0176727	#N/A
MSTRG.33498.1	Female	Male	-4.38277	0.873596	0.000614368	0.0129833	#N/A
MSTRG.17576.1	Female	Male	-4.38253	2.14451	0.00334773	0.0400123	#N/A
MSTRG.30974.1	Female	Male	-4.38013	2.13919	0.00149147	0.0234222	#N/A
MSTRG.11523.1	Female	Male	-4.37972	1.31681	0.00456801	0.0494387	#N/A
MSTRG.48092.1	Female	Male	-4.37719	1.01438	0.000619312	0.0130362	#N/A
MSTRG.37408.1	Female	Male	-4.37394	3.46567	0.00359882	0.0418257	#N/A
g10830.t1	Female	Male	-4.37344	0.937695	0.000883683	0.0166825	#N/A
MSTRG.42162.1	Female	Male	-4.37032	0.868888	0.00183125	0.0267421	#N/A
MSTRG.38592.1	Female	Male	-4.36972	1.92924	0.000654454	0.013486	#N/A
MSTRG.9136.1	Female	Male	-4.3689	1.26103	0.000938322	0.0173609	#N/A
MSTRG.43439.1	Female	Male	-4.36862	0.171339	0.00149742	0.0234692	#N/A
g12099.t2	Female	Male	-4.36766	2.77734	0.00298182	0.0371954	#N/A
MSTRG.44022.1	Female	Male	-4.36627	1.70372	0.00174413	0.0258375	#N/A
g3699.t1	Female	Male	-4.36579	0.866234	0.00219607	0.0299764	#N/A
MSTRG.20838.1	Female	Male	-4.36525	0.395989	0.00129309	0.0214081	#N/A
MSTRG.48840.1	Female	Male	-4.36509	0.777612	0.00102107	0.0184081	#N/A
MSTRG.31604.1	Female	Male	-4.36381	2.22956	0.0023787	0.0315	#N/A
MSTRG.16706.1	Female	Male	-4.363	0.596859	0.00125898	0.0211443	#N/A
MSTRG.30031.2	Female	Male	-4.36251	0.678709	0.00421144	0.0467909	#N/A
MSTRG.465.1	Female	Male	-4.3614	1.02577	0.00326734	0.0393936	#N/A
g16144.t1	Female	Male	-4.36044	0.603275	0.00342478	0.0405967	#N/A
MSTRG.10515.2	Female	Male	-4.35746	0.152154	0.00306146	0.0377189	#N/A
MSTRG.47710.1	Female	Male	-4.35248	1.49327	0.00180086	0.0264435	#N/A
MSTRG.30437.1	Female	Male	-4.35077	0.496669	0.000563147	0.012178	#N/A
g9206.t1	Female	Male	-4.35026	0.384182	0.00133834	0.0220209	#N/A
MSTRG.13961.1	Female	Male	-4.34778	-0.275347	0.00258991	0.0336035	#N/A
MSTRG.20079.1	Female	Male	-4.34637	1.78292	0.00428441	0.0472486	#N/A
MSTRG.19565.1	Female	Male	-4.34611	0.014904	0.00217886	0.029787	#N/A
MSTRG.1147.1	Female	Male	-4.3445	3.57929	0.00193341	0.0276022	#N/A
g10424.t1	Female	Male	-4.34396	1.49529	0.00235784	0.0313683	#N/A
g11763.t1	Female	Male	-4.34265	1.89512	0.0020744	0.0289817	#N/A
MSTRG.47388.1	Female	Male	-4.34256	1.20352	0.00344612	0.0407593	#N/A
MSTRG.15823.2	Female	Male	-4.33807	0.587352	0.00462087	0.0499098	#N/A
MSTRG.12925.1	Female	Male	-4.33572	1.61563	0.00146194	0.0231882	#N/A
MSTRG.1915.1	Female	Male	-4.33352	1.97405	0.00147016	0.0232325	#N/A
MSTRG.35346.1	Female	Male	-4.33271	1.97265	0.00122542	0.0207238	#N/A
MSTRG.23173.1	Female	Male	-4.33127	0.745646	0.00112035	0.0196937	#N/A
MSTRG.47339.1	Female	Male	-4.32971	1.40705	0.00176413	0.0260616	#N/A
MSTRG.11613.1	Female	Male	-4.32952	0.994342	0.00308598	0.0379596	#N/A
MSTRG.43832.1	Female	Male	-4.32951	1.19805	0.00343367	0.0406555	#N/A
MSTRG.18948.3	Female	Male	-4.32787	1.23438	0.00129611	0.0214447	#N/A
MSTRG.44882.1	Female	Male	-4.32715	1.2946	0.000968305	0.017756	#N/A
MSTRG.786.1	Female	Male	-4.32693	0.123759	0.00321299	0.0389137	#N/A
MSTRG.25474.1	Female	Male	-4.3225	2.45025	0.00238722	0.0315358	#N/A
MSTRG.47022.1	Female	Male	-4.31761	2.1259	0.00228417	0.030678	#N/A
MSTRG.9875.1	Female	Male	-4.31567	0.550488	0.00110412	0.0195111	#N/A
MSTRG.25481.1	Female	Male	-4.31558	1.91953	0.00139002	0.0224569	#N/A
MSTRG.49340.1	Female	Male	-4.3124	2.45328	0.00147664	0.0232679	#N/A
MSTRG.33281.1	Female	Male	-4.31192	2.25884	0.000556324	0.0121106	#N/A
MSTRG.33806.3	Female	Male	-4.31118	0.64434	0.00191198	0.0273985	#N/A
MSTRG.18909.1	Female	Male	-4.30902	1.08849	0.000751966	0.0149315	#N/A
g14602.t1	Female	Male	-4.30515	1.13266	0.00102639	0.0184419	#N/A
MSTRG.34862.1	Female	Male	-4.30505	1.99051	0.000772722	0.0152571	#N/A
MSTRG.11815.1	Female	Male	-4.30058	1.18554	0.000993416	0.0180802	#N/A
g4032.t1	Female	Male	-4.30043	0.453567	0.00144701	0.0230436	#N/A
MSTRG.15893.1	Female	Male	-4.29692	-0.155494	0.00229984	0.0307803	#N/A
MSTRG.30434.1	Female	Male	-4.29366	1.67816	0.00201851	0.0285105	#N/A
MSTRG.37792.1	Female	Male	-4.29135	1.74753	0.00086705	0.0165221	#N/A
MSTRG.28940.1	Female	Male	-4.29087	1.57315	0.00151109	0.0236005	#N/A
MSTRG.31484.3	Female	Male	-4.28636	1.15186	0.00236643	0.0314513	#N/A
MSTRG.278.1	Female	Male	-4.28363	2.46834	0.00138143	0.0223316	#N/A
MSTRG.27274.1	Female	Male	-4.28184	0.208438	0.00288239	0.0362678	#N/A
MSTRG.15948.1	Female	Male	-4.2816	2.67243	0.00363991	0.0422299	#N/A
MSTRG.21276.1	Female	Male	-4.27903	1.98797	0.0013688	0.0221834	#N/A
MSTRG.26470.1	Female	Male	-4.27832	0.70702	0.00338153	0.0402444	#N/A
MSTRG.15875.1	Female	Male	-4.27802	2.29954	0.000805487	0.0156727	#N/A
MSTRG.23035.1	Female	Male	-4.27644	1.53778	0.00305435	0.0377189	#N/A
MSTRG.8258.1	Female	Male	-4.27541	1.12267	0.000750956	0.0149315	#N/A
MSTRG.41986.1	Female	Male	-4.27122	0.607047	0.00136538	0.0221658	#N/A
MSTRG.11517.1	Female	Male	-4.26787	1.14083	0.00396131	0.0447801	#N/A
MSTRG.17444.1	Female	Male	-4.26704	0.781948	0.0034945	0.0411299	#N/A
MSTRG.35672.1	Female	Male	-4.26496	2.02592	0.00434385	0.0477663	#N/A
MSTRG.50460.1	Female	Male	-4.26466	0.762097	0.000754107	0.0149558	#N/A
MSTRG.13085.1	Female	Male	-4.26456	1.51499	0.0027736	0.0353693	#N/A
MSTRG.35287.1	Female	Male	-4.26366	1.8368	0.00109643	0.0194393	#N/A
MSTRG.45515.1	Female	Male	-4.2613	2.05053	0.00141962	0.0227701	#N/A
MSTRG.42989.1	Female	Male	-4.2612	-0.35412	0.00376755	0.0431679	#N/A
g8725.t1	Female	Male	-4.26057	-0.062879	0.00315702	0.0386028	#N/A
MSTRG.42972.2	Female	Male	-4.26034	0.600447	0.00272535	0.0348371	#N/A
MSTRG.20358.1	Female	Male	-4.25993	1.0341	0.00174117	0.0258222	#N/A
MSTRG.44480.1	Female	Male	-4.25905	1.92008	0.0020299	0.0285532	#N/A
MSTRG.25479.1	Female	Male	-4.25901	2.46506	0.000710019	0.0142933	#N/A
MSTRG.1342.3	Female	Male	-4.25808	1.43649	0.0031953	0.038812	#N/A
MSTRG.11258.1	Female	Male	-4.25747	0.970034	0.000653752	0.013486	#N/A
MSTRG.21174.1	Female	Male	-4.25683	0.594574	0.00229722	0.030776	#N/A
MSTRG.9574.1	Female	Male	-4.25605	1.54913	0.00187883	0.0271415	#N/A
MSTRG.30398.1	Female	Male	-4.25552	2.03992	0.00356268	0.0414958	#N/A
MSTRG.39667.1	Female	Male	-4.25502	1.58875	0.000774883	0.0152772	#N/A
g7948.t1	Female	Male	-4.25253	0.594942	0.00310681	0.0381983	#N/A
MSTRG.15382.1	Female	Male	-4.2495	1.86947	0.00207739	0.0290076	#N/A
MSTRG.21598.1	Female	Male	-4.24723	0.0603016	0.00200733	0.0283698	#N/A
MSTRG.18050.1	Female	Male	-4.24657	2.30954	0.00121316	0.0205813	#N/A
MSTRG.4127.1	Female	Male	-4.2452	1.31211	0.000577567	0.012373	#N/A
MSTRG.49346.1	Female	Male	-4.24123	1.22451	0.00196515	0.0278916	#N/A
MSTRG.12703.1	Female	Male	-4.23904	0.393229	0.00117505	0.0201954	#N/A
MSTRG.11290.4	Female	Male	-4.23461	2.02157	0.00100414	0.0181933	#N/A
MSTRG.20582.1	Female	Male	-4.23349	2.16241	0.00266422	0.0342356	#N/A
MSTRG.16933.1	Female	Male	-4.23332	1.75633	0.0028068	0.0356229	#N/A
g14355.t1	Female	Male	-4.23289	0.0389676	0.00423806	0.0469698	#N/A
MSTRG.40831.1	Female	Male	-4.23226	0.387624	0.00276611	0.0352906	#N/A
MSTRG.41049.2	Female	Male	-4.23147	0.733334	0.00127754	0.0212955	#N/A
MSTRG.23220.1	Female	Male	-4.22938	1.6787	0.000982797	0.0179235	#N/A
MSTRG.48656.2	Female	Male	-4.22909	1.36906	0.00298658	0.0371954	#N/A
MSTRG.35490.1	Female	Male	-4.22888	1.48576	0.000875339	0.0166209	#N/A
g13531.t1	Female	Male	-4.22725	1.64783	0.00448765	0.0488258	#N/A
g3666.t1	Female	Male	-4.22672	0.874445	0.000548596	0.0120009	#N/A
MSTRG.13457.4	Female	Male	-4.22508	1.43365	0.00354124	0.0413966	#N/A
MSTRG.47923.1	Female	Male	-4.22384	2.39895	0.00186404	0.0269716	#N/A
MSTRG.16207.2	Female	Male	-4.22256	0.375086	0.0039916	0.0450026	#N/A
MSTRG.32040.1	Female	Male	-4.2218	0.882832	0.00234843	0.0313054	#N/A
MSTRG.39661.1	Female	Male	-4.21827	1.39026	0.000528953	0.0117343	#N/A
MSTRG.18066.1	Female	Male	-4.2181	1.1203	0.000515241	0.0115547	#N/A
MSTRG.5525.1	Female	Male	-4.21393	0.459485	0.00183459	0.0267421	#N/A
MSTRG.24252.1	Female	Male	-4.21378	0.460468	0.00112889	0.019785	#N/A
MSTRG.39587.1	Female	Male	-4.21192	0.861658	0.000744874	0.0148608	#N/A
MSTRG.42953.1	Female	Male	-4.21153	0.72134	0.00254241	0.0331156	#N/A
MSTRG.20794.1	Female	Male	-4.21043	1.32433	0.00414617	0.0462646	#N/A
MSTRG.3663.1	Female	Male	-4.2104	0.634911	0.00180053	0.0264435	#N/A
MSTRG.24662.1	Female	Male	-4.20843	0.930259	0.00133618	0.0219989	#N/A
MSTRG.26728.1	Female	Male	-4.20034	1.21192	0.00281145	0.0356316	#N/A
MSTRG.1128.1	Female	Male	-4.1991	1.40546	0.00170823	0.0255318	#N/A
MSTRG.47395.1	Female	Male	-4.19877	1.80379	0.00102228	0.0184176	#N/A
MSTRG.35386.1	Female	Male	-4.19458	1.41555	0.00448576	0.0488251	#N/A
MSTRG.40886.1	Female	Male	-4.19175	0.905637	0.000813653	0.0157529	#N/A
MSTRG.9482.1	Female	Male	-4.19144	1.11519	0.00226442	0.0305265	#N/A
MSTRG.7960.1	Female	Male	-4.18864	0.44277	0.000934151	0.0173197	#N/A
g1967.t1	Female	Male	-4.18625	0.241242	0.00154527	0.0240082	#N/A
MSTRG.8784.5	Female	Male	-4.18425	0.337721	0.00282428	0.0357599	#N/A
MSTRG.3963.1	Female	Male	-4.17889	1.35913	0.000681771	0.0138392	#N/A
MSTRG.47956.1	Female	Male	-4.1768	1.11079	0.00294266	0.0367887	#N/A
MSTRG.7269.1	Female	Male	-4.17314	1.01561	0.000888754	0.0167331	#N/A
MSTRG.45923.1	Female	Male	-4.16606	0.124242	0.00348294	0.0410435	#N/A
MSTRG.15189.1	Female	Male	-4.16391	1.35626	0.00208273	0.0290545	#N/A
MSTRG.13273.1	Female	Male	-4.16361	0.683895	0.00366229	0.0424159	#N/A
MSTRG.28322.6	Female	Male	-4.1624	0.895726	0.00250582	0.0327507	#N/A
MSTRG.1819.1	Female	Male	-4.16227	1.60313	0.00383899	0.0438175	#N/A
g11896.t1	Female	Male	-4.1617	1.02011	0.00229376	0.0307606	#N/A
MSTRG.25467.1	Female	Male	-4.16073	2.8618	0.00162888	0.0248881	#N/A
MSTRG.50527.1	Female	Male	-4.15964	0.885281	0.00130262	0.0215126	#N/A
MSTRG.35033.1	Female	Male	-4.15939	2.53378	0.00329788	0.0396166	#N/A
MSTRG.18912.1	Female	Male	-4.15923	2.06402	0.00261534	0.0338678	#N/A
MSTRG.47683.2	Female	Male	-4.1556	1.22842	0.000618328	0.013036	#N/A
MSTRG.37332.1	Female	Male	-4.15523	1.43011	0.00113931	0.0198958	#N/A
MSTRG.46097.1	Female	Male	-4.15499	0.500987	0.00308292	0.0379394	#N/A
MSTRG.41807.1	Female	Male	-4.15419	1.73573	0.001732	0.025729	#N/A
MSTRG.33824.1	Female	Male	-4.15342	0.0892023	0.0034042	0.0404146	#N/A
MSTRG.8125.1	Female	Male	-4.15272	1.30981	0.00394373	0.04467	#N/A
MSTRG.1107.1	Female	Male	-4.14986	0.106567	0.00189065	0.0272115	#N/A
MSTRG.39116.1	Female	Male	-4.14557	1.93496	0.00392615	0.044508	#N/A
MSTRG.31569.1	Female	Male	-4.13705	1.631	0.00436054	0.0478515	#N/A
MSTRG.6477.1	Female	Male	-4.13696	0.736266	0.00397137	0.0448123	#N/A
MSTRG.27134.1	Female	Male	-4.13521	1.2805	0.00183525	0.0267421	#N/A
g3992.t1	Female	Male	-4.13431	1.48188	0.00141449	0.022715	#N/A
MSTRG.35443.1	Female	Male	-4.1337	0.0720942	0.00373688	0.0429084	#N/A
g1874.t1	Female	Male	-4.13153	1.15441	0.00110035	0.0194831	#N/A
MSTRG.47233.1	Female	Male	-4.12751	1.45372	0.00111706	0.0196618	#N/A
MSTRG.5934.1	Female	Male	-4.12589	0.283889	0.00213508	0.0293837	#N/A
MSTRG.3892.1	Female	Male	-4.12562	0.789164	0.00187163	0.0270669	#N/A
MSTRG.24009.1	Female	Male	-4.12503	1.43549	0.00305067	0.0377162	#N/A
MSTRG.29368.1	Female	Male	-4.12393	1.14796	0.00197719	0.0280327	#N/A
MSTRG.16635.1	Female	Male	-4.12352	2.03505	0.00182812	0.0267119	#N/A
MSTRG.30792.2	Female	Male	-4.11745	0.702049	0.000788257	0.0154612	#N/A
MSTRG.38205.1	Female	Male	-4.11639	0.781804	0.00225806	0.0304958	#N/A
MSTRG.33508.1	Female	Male	-4.11533	2.08157	0.00110912	0.0195864	#N/A
MSTRG.15738.1	Female	Male	-4.11383	2.27263	0.00248002	0.0325088	#N/A
MSTRG.2470.1	Female	Male	-4.11375	0.462432	0.00113868	0.0198958	#N/A
g2047.t1	Female	Male	-4.11336	0.373054	0.0012671	0.0211876	#N/A
MSTRG.33300.1	Female	Male	-4.11332	2.14406	0.00347269	0.0409863	#N/A
g9770.t1	Female	Male	-4.10945	2.86018	0.00285979	0.0361241	#N/A
g10470.t1	Female	Male	-4.10527	0.76367	0.00135723	0.0220996	#N/A
MSTRG.49830.1	Female	Male	-4.10407	2.4833	0.000680698	0.0138279	#N/A
MSTRG.4921.1	Female	Male	-4.10241	0.83041	0.000998219	0.0181438	#N/A
g4310.t1	Female	Male	-4.10197	0.271108	0.00247497	0.0324744	#N/A
MSTRG.5401.2	Female	Male	-4.09692	1.05937	0.000802439	0.0156362	#N/A
MSTRG.25766.1	Female	Male	-4.09659	0.753101	0.00142101	0.0227787	#N/A
MSTRG.16223.1	Female	Male	-4.09591	0.254997	0.00210694	0.0292218	#N/A
MSTRG.30385.2	Female	Male	-4.09582	0.832334	0.0023639	0.0314333	#N/A
g6550.t1	Female	Male	-4.09573	0.442113	0.00114524	0.0199607	#N/A
MSTRG.48185.1	Female	Male	-4.0908	1.62667	0.00290932	0.0365599	#N/A
g1682.t2	Female	Male	-4.09057	0.355074	0.00152951	0.0238187	#N/A
MSTRG.4274.3	Female	Male	-4.09039	1.71557	0.00355272	0.041434	#N/A
g7931.t6	Female	Male	-4.08922	0.249949	0.00432365	0.0476029	#N/A
MSTRG.22374.1	Female	Male	-4.08867	0.941245	0.00101508	0.0183373	#N/A
MSTRG.20993.2	Female	Male	-4.08349	1.19977	0.0010246	0.0184255	#N/A
MSTRG.29523.1	Female	Male	-4.08097	0.958296	0.00451617	0.0491161	#N/A
MSTRG.37740.1	Female	Male	-4.08021	1.84235	0.00174318	0.0258375	#N/A
MSTRG.35724.2	Female	Male	-4.07941	0.808444	0.00251376	0.0328081	#N/A
MSTRG.46245.1	Female	Male	-4.0791	0.936037	0.0011023	0.0195014	#N/A
g16542.t1	Female	Male	-4.07691	0.0201597	0.00424937	0.0470273	#N/A
MSTRG.2157.1	Female	Male	-4.07593	2.55383	0.00135969	0.0221137	#N/A
MSTRG.33273.1	Female	Male	-4.07482	0.936904	0.00135134	0.0220836	#N/A
MSTRG.2200.2	Female	Male	-4.07448	1.37792	0.00127504	0.0212804	#N/A
MSTRG.10545.1	Female	Male	-4.07262	0.333367	0.00426541	0.0470779	#N/A
MSTRG.11249.1	Female	Male	-4.07196	1.59721	0.00367957	0.0425194	#N/A
MSTRG.2864.1	Female	Male	-4.0691	2.46804	0.00214574	0.0295117	#N/A
MSTRG.33785.1	Female	Male	-4.06855	0.509356	0.00364539	0.0422752	#N/A
MSTRG.41463.1	Female	Male	-4.06764	2.54458	0.000927078	0.0172363	#N/A
g3010.t1	Female	Male	-4.06739	0.500342	0.00207446	0.0289817	#N/A
MSTRG.46073.1	Female	Male	-4.06522	1.48464	0.00101881	0.0183921	#N/A
MSTRG.4018.1	Female	Male	-4.06496	1.23346	0.00352477	0.041306	#N/A
g12843.t1	Female	Male	-4.06284	0.575951	0.00133959	0.0220279	#N/A
MSTRG.30015.1	Female	Male	-4.06122	1.10472	0.00312884	0.038381	#N/A
MSTRG.22517.1	Female	Male	-4.05927	0.86692	0.00339499	0.0403686	#N/A
MSTRG.21806.1	Female	Male	-4.0585	2.47604	0.00121238	0.0205813	#N/A
MSTRG.17607.1	Female	Male	-4.05443	1.21646	0.00377176	0.0431976	#N/A
MSTRG.30981.1	Female	Male	-4.05295	1.03459	0.0022694	0.0305564	#N/A
MSTRG.27875.1	Female	Male	-4.05204	0.565865	0.00171992	0.0256636	#N/A
MSTRG.40138.1	Female	Male	-4.0438	2.12747	0.00180514	0.026451	#N/A
MSTRG.37240.1	Female	Male	-4.04239	0.635806	0.00230423	0.0308237	#N/A
MSTRG.34852.1	Female	Male	-4.04228	0.836921	0.00100309	0.0181933	#N/A
MSTRG.33469.1	Female	Male	-4.04131	2.8403	0.00149552	0.0234531	#N/A
MSTRG.4963.1	Female	Male	-4.04082	0.698348	0.00134942	0.0220836	#N/A
g14309.t1	Female	Male	-4.04043	1.01704	0.00238811	0.0315358	#N/A
MSTRG.2481.1	Female	Male	-4.03909	0.475131	0.00143853	0.0229907	#N/A
MSTRG.29846.1	Female	Male	-4.03844	1.51586	0.00208293	0.0290545	#N/A
MSTRG.8123.1	Female	Male	-4.03669	1.57496	0.00202692	0.0285412	#N/A
MSTRG.32146.1	Female	Male	-4.03549	1.29861	0.00136707	0.0221798	#N/A
g15775.t1	Female	Male	-4.03496	0.473341	0.00122653	0.0207293	#N/A
MSTRG.27005.1	Female	Male	-4.02222	0.833961	0.00425066	0.0470273	#N/A
g16304.t1	Female	Male	-4.02213	0.0836234	0.00287654	0.036237	#N/A
g7915.t3	Female	Male	-4.02006	1.70928	0.00164404	0.0250242	#N/A
MSTRG.39583.1	Female	Male	-4.0171	0.883889	0.00161864	0.0247775	#N/A
MSTRG.32960.3	Female	Male	-4.01671	0.815862	0.00104983	0.0187498	#N/A
MSTRG.8175.1	Female	Male	-4.01657	0.546952	0.00442755	0.0483955	#N/A
MSTRG.35215.1	Female	Male	-4.01504	2.38785	0.00268109	0.0344028	#N/A
MSTRG.37564.1	Female	Male	-4.01145	1.52162	0.00258668	0.0335779	#N/A
MSTRG.47597.1	Female	Male	-4.01113	1.37233	0.00327864	0.0394943	#N/A
MSTRG.16841.1	Female	Male	-4.01008	1.26827	0.00334717	0.0400123	#N/A
MSTRG.41273.1	Female	Male	-4.01003	1.22212	0.00366909	0.042458	#N/A
MSTRG.25815.1	Female	Male	-4.00649	1.54672	0.00185138	0.0268756	#N/A
MSTRG.14779.1	Female	Male	-4.00616	1.21733	0.00317339	0.0387321	#N/A
MSTRG.44340.1	Female	Male	-4.00596	2.06269	0.00106851	0.0189947	#N/A
MSTRG.29043.1	Female	Male	-4.00542	0.97822	0.00208672	0.0290923	#N/A
MSTRG.16954.1	Female	Male	-4.00341	1.04047	0.00119276	0.0203775	#N/A
MSTRG.2984.1	Female	Male	-3.99961	1.2128	0.00211637	0.0292617	#N/A
g12491.t1	Female	Male	-3.99932	0.264516	0.00222886	0.0302234	#N/A
MSTRG.23103.2	Female	Male	-3.99912	0.733887	0.00227403	0.0305879	#N/A
MSTRG.28357.1	Female	Male	-3.99561	2.11972	0.00164583	0.0250269	#N/A
MSTRG.3434.1	Female	Male	-3.99316	0.161501	0.00264893	0.0341375	#N/A
MSTRG.3961.1	Female	Male	-3.99006	0.522384	0.00460198	0.0497499	#N/A
MSTRG.8303.1	Female	Male	-3.98775	0.93672	0.00454392	0.0492577	#N/A
MSTRG.45023.1	Female	Male	-3.98548	0.784938	0.00183631	0.0267421	#N/A
MSTRG.31606.1	Female	Male	-3.98544	-0.161846	0.00327857	0.0394943	#N/A
MSTRG.47239.1	Female	Male	-3.97848	0.903697	0.00232867	0.0310898	#N/A
MSTRG.28667.1	Female	Male	-3.97789	1.75178	0.00238734	0.0315358	#N/A
MSTRG.10790.1	Female	Male	-3.97701	0.964794	0.00287268	0.0362185	#N/A
MSTRG.1488.1	Female	Male	-3.97468	0.57074	0.00124251	0.0209201	#N/A
MSTRG.11087.1	Female	Male	-3.9676	1.68815	0.00150929	0.0235862	#N/A
MSTRG.48457.1	Female	Male	-3.96742	1.86873	0.00274009	0.0350088	#N/A
MSTRG.25650.1	Female	Male	-3.9645	1.3219	0.00298551	0.0371954	#N/A
MSTRG.11153.1	Female	Male	-3.96211	1.16106	0.00281618	0.0356743	#N/A
MSTRG.11755.1	Female	Male	-3.96179	0.772017	0.00212699	0.0293716	#N/A
MSTRG.18329.1	Female	Male	-3.9617	0.776288	0.00373098	0.0428913	#N/A
MSTRG.46907.1	Female	Male	-3.95843	1.94173	0.00195818	0.027837	#N/A
MSTRG.44582.1	Female	Male	-3.95785	0.699446	0.00215558	0.0296049	#N/A
MSTRG.3306.3	Female	Male	-3.9566	1.48727	0.00317107	0.0387215	#N/A
MSTRG.6986.10	Female	Male	-3.95643	3.67419	0.00225169	0.0304386	#N/A
MSTRG.48067.1	Female	Male	-3.95405	1.55451	0.00160993	0.0246973	#N/A
MSTRG.33745.2	Female	Male	-3.95382	1.84688	0.00153484	0.0238739	#N/A
MSTRG.19803.1	Female	Male	-3.95203	1.64071	0.00129009	0.0213715	#N/A
MSTRG.11969.1	Female	Male	-3.9513	1.38058	0.00197907	0.0280445	#N/A
MSTRG.2066.1	Female	Male	-3.95089	1.94246	0.00255877	0.0332641	#N/A
g12849.t1	Female	Male	-3.94951	2.15427	0.00167495	0.0252887	#N/A
MSTRG.39211.1	Female	Male	-3.94621	0.941995	0.00265158	0.0341552	#N/A
MSTRG.48247.1	Female	Male	-3.94563	1.24909	0.0030145	0.0374072	#N/A
g13332.t1	Female	Male	-3.94479	1.28064	0.00355653	0.0414603	#N/A
MSTRG.17026.1	Female	Male	-3.94475	0.305463	0.00326389	0.0393698	#N/A
MSTRG.1665.1	Female	Male	-3.94344	1.25687	0.00292408	0.036642	#N/A
g8494.t1	Female	Male	-3.94324	2.46251	0.000999063	0.0181459	#N/A
MSTRG.17676.1	Female	Male	-3.94186	0.796859	0.00169652	0.0254279	#N/A
g7093.t1	Female	Male	-3.94055	1.36271	0.00147448	0.0232644	#N/A
MSTRG.4426.1	Female	Male	-3.93973	1.51326	0.00157945	0.0243695	#N/A
MSTRG.31737.2	Female	Male	-3.93805	0.117051	0.00263943	0.0340373	#N/A
MSTRG.18046.1	Female	Male	-3.93521	1.66937	0.00200221	0.0283214	#N/A
MSTRG.35164.1	Female	Male	-3.92817	1.37459	0.00267364	0.0343402	#N/A
MSTRG.10056.1	Female	Male	-3.92702	1.33078	0.00128674	0.0213634	#N/A
MSTRG.45635.1	Female	Male	-3.92628	0.805402	0.00421667	0.0467909	#N/A
g763.t1	Female	Male	-3.92451	0.672867	0.00279304	0.0355325	#N/A
MSTRG.46785.1	Female	Male	-3.92436	1.03373	0.00255472	0.0332275	#N/A
MSTRG.22430.2	Female	Male	-3.92435	0.73541	0.00369417	0.0426192	#N/A
MSTRG.47373.1	Female	Male	-3.92292	0.930418	0.00400465	0.0450928	#N/A
MSTRG.46854.1	Female	Male	-3.92207	2.64732	0.00220989	0.0300883	#N/A
MSTRG.38276.1	Female	Male	-3.92204	0.850552	0.00188653	0.0272087	#N/A
MSTRG.17375.1	Female	Male	-3.92153	1.30478	0.00170461	0.025492	#N/A
MSTRG.41909.1	Female	Male	-3.91992	1.7534	0.00149182	0.0234222	#N/A
g12193.t1	Female	Male	-3.9173	0.279568	0.00318833	0.038812	#N/A
MSTRG.17001.1	Female	Male	-3.9154	1.84002	0.00185776	0.0269391	#N/A
MSTRG.2802.5	Female	Male	-3.91389	0.187483	0.00425969	0.047073	#N/A
MSTRG.18824.1	Female	Male	-3.90933	1.17395	0.00341907	0.0405469	#N/A
g9521.t1	Female	Male	-3.90749	1.3315	0.00121279	0.0205813	#N/A
MSTRG.38659.1	Female	Male	-3.90529	1.78892	0.00188525	0.0272049	#N/A
MSTRG.47376.1	Female	Male	-3.90363	1.52238	0.00223147	0.0302283	#N/A
MSTRG.9022.1	Female	Male	-3.90356	0.877898	0.00300242	0.0373431	#N/A
MSTRG.35310.1	Female	Male	-3.90254	0.646272	0.00151706	0.0236799	#N/A
MSTRG.5388.1	Female	Male	-3.90114	1.05667	0.00290264	0.0364931	#N/A
MSTRG.1065.1	Female	Male	-3.89889	1.31807	0.00236775	0.0314532	#N/A
MSTRG.39594.1	Female	Male	-3.89356	1.45696	0.00159407	0.0245102	#N/A
MSTRG.29267.1	Female	Male	-3.89277	3.20941	0.00154746	0.0240282	#N/A
[truncated: 479 more rows]

## Sheet: G. Halichondria panicea
Transcript_ID	sampleA	sampleB	logFC	logCPM	PValue	FDR	Sex_loci
Hpan_g9236.t1	Female	Male	-9.6717	2.68537	2.40299e-10	2.00552e-07	FEM
Hpan_g1388.t1	Female	Male	-8.8364	1.89679	0.000503842	0.0248268	FEM
Hpan_g11122.t1	Female	Male	-5.65644	2.90277	0.000197738	0.0124552	FEM
Hpan_g9035.t4	Female	Male	-4.04099	5.05968	1.84361e-08	6.1356e-06	FEM
Hpan_g7629.t1	Female	Male	-3.00696	5.62197	0.000202964	0.0126649	FEM
Hpan_g15646.t1	Female	Male	-15.5244	8.48458	3.08286e-11	3.74245e-08	#N/A
Hpan_g10912.t1	Female	Male	-15.1216	8.08209	8.57737e-22	2.29076e-17	#N/A
Hpan_g15391.t1	Female	Male	-15.0171	7.97763	7.24875e-13	1.75993e-09	#N/A
MSTRG.15819.1	Female	Male	-14.5846	7.54573	3.4318e-11	3.98491e-08	#N/A
Hpan_g14732.t1	Female	Male	-14.3303	7.2919	7.8511e-05	0.00634515	#N/A
Hpan_g4328.t1	Female	Male	-14.0669	7.02882	3.02516e-13	1.00991e-09	#N/A
Hpan_g14732.t3	Female	Male	-13.8671	6.82961	1.10812e-05	0.00128115	#N/A
Hpan_g14732.t2	Female	Male	-13.6484	6.61142	6.80605e-08	1.85479e-05	#N/A
MSTRG.10268.1	Female	Male	-13.5823	6.54543	1.88181e-08	6.1356e-06	#N/A
MSTRG.2987.5	Female	Male	-13.5575	6.52092	1.22887e-07	2.98358e-05	#N/A
Hpan_g6580.t1	Female	Male	-13.0359	6.00076	1.38579e-08	5.00139e-06	#N/A
Hpan_g819.t1	Female	Male	-12.9521	5.91701	2.80609e-13	1.00991e-09	#N/A
MSTRG.10268.18	Female	Male	-12.9478	5.9133	6.35166e-06	0.000811645	#N/A
Hpan_g9217.t1	Female	Male	-12.766	5.73216	4.20213e-05	0.00383025	#N/A
Hpan_g13221.t1	Female	Male	-12.7062	5.67235	2.85785e-10	2.24484e-07	#N/A
MSTRG.10268.11	Female	Male	-12.6444	5.61143	0.000213166	0.0130874	#N/A
MSTRG.11605.1	Female	Male	-12.6304	5.59679	1.66136e-14	1.10925e-10	#N/A
Hpan_g16007.t1	Female	Male	-12.5768	9.27462	9.11345e-09	3.52744e-06	#N/A
Hpan_g10510.t1	Female	Male	-12.4793	5.44664	4.99948e-10	3.4317e-07	#N/A
MSTRG.13545.5	Female	Male	-12.4658	7.97987	0.000794485	0.0347272	#N/A
Hpan_g12091.t1	Female	Male	-12.4404	5.40784	1.28786e-12	2.45677e-09	#N/A
MSTRG.10268.5	Female	Male	-12.4349	5.40154	2.16442e-07	4.66171e-05	#N/A
MSTRG.10268.7	Female	Male	-12.4311	5.39807	2.01153e-06	0.000314163	#N/A
Hpan_g13370.t1	Female	Male	-12.3925	5.36048	3.27288e-07	6.67242e-05	#N/A
Hpan_g9779.t1	Female	Male	-12.2244	5.19314	1.71539e-12	2.54516e-09	#N/A
Hpan_g4092.t1	Female	Male	-12.2203	5.18928	3.16229e-09	1.56399e-06	#N/A
MSTRG.13545.2	Female	Male	-12.1943	5.16128	0.000709194	0.0322117	#N/A
Hpan_g13890.t1	Female	Male	-12.1612	5.13031	3.87646e-15	3.45095e-11	#N/A
Hpan_g3933.t1	Female	Male	-12.1555	5.12526	0.000231137	0.0139031	#N/A
Hpan_g1810.t1	Female	Male	-12.1511	5.12068	6.58533e-08	1.81314e-05	#N/A
Hpan_g15965.t1	Female	Male	-12.1186	5.08815	2.82643e-06	0.000424075	#N/A
MSTRG.8574.1	Female	Male	-12.1025	5.07142	6.67928e-05	0.00557449	#N/A
Hpan_g2696.t1	Female	Male	-12.0454	5.01604	0.000120628	0.00868356	#N/A
Hpan_g5039.t1	Female	Male	-12.0407	5.01102	4.48962e-08	1.28929e-05	#N/A
MSTRG.10268.4	Female	Male	-12.0193	4.98858	6.03528e-06	0.000786265	#N/A
MSTRG.10268.6	Female	Male	-11.9446	4.9146	7.13596e-05	0.005864	#N/A
MSTRG.11644.1	Female	Male	-11.8894	4.86136	3.5863e-05	0.00337251	#N/A
MSTRG.8975.3	Female	Male	-11.7617	4.73508	8.65777e-05	0.00684092	#N/A
MSTRG.3591.13	Female	Male	-11.7535	4.72637	5.4261e-09	2.33734e-06	#N/A
MSTRG.13545.9	Female	Male	-11.7214	4.6939	4.26785e-08	1.23893e-05	#N/A
Hpan_g9574.t1	Female	Male	-11.7191	4.69236	0.000252307	0.0147657	#N/A
Hpan_g1189.t1	Female	Male	-11.7096	4.68255	1.88973e-09	1.05144e-06	#N/A
Hpan_g14505.t1	Female	Male	-11.693	4.66632	1.52062e-08	5.34356e-06	#N/A
MSTRG.18573.3	Female	Male	-11.6119	4.58579	0.000324538	0.0177611	#N/A
Hpan_g7121.t1	Female	Male	-11.5744	4.54873	5.71083e-07	0.000103754	#N/A
Hpan_g14857.t1	Female	Male	-11.5625	4.53782	0.000107636	0.00804257	#N/A
Hpan_g9865.t1	Female	Male	-11.55	4.52514	0.000501212	0.0247428	#N/A
MSTRG.5887.13	Female	Male	-11.5355	4.51131	3.48692e-05	0.00330231	#N/A
Hpan_g8560.t1	Female	Male	-11.4926	4.46804	1.40595e-07	3.32289e-05	#N/A
MSTRG.10268.32	Female	Male	-11.3854	4.363	0.000221481	0.013474	#N/A
Hpan_g13440.t1	Female	Male	-11.3377	4.31461	2.56277e-08	7.69032e-06	#N/A
Hpan_g3979.t1	Female	Male	-11.3053	4.2828	8.59774e-09	3.37676e-06	#N/A
Hpan_g14865.t1	Female	Male	-11.2881	4.26602	5.02164e-07	9.50602e-05	#N/A
Hpan_g13625.t1	Female	Male	-11.2781	4.25588	4.39263e-09	2.02266e-06	#N/A
Hpan_g3181.t1	Female	Male	-11.2741	4.25172	2.9605e-10	2.25903e-07	#N/A
MSTRG.6692.5	Female	Male	-11.2717	4.2501	0.00125065	0.046825	#N/A
Hpan_g15680.t1	Female	Male	-11.2589	4.23715	1.93294e-08	6.19297e-06	#N/A
Hpan_g5038.t1	Female	Male	-11.2461	4.22485	1.38607e-06	0.000228505	#N/A
Hpan_g6355.t1	Female	Male	-11.2266	4.20491	4.34121e-11	4.45926e-08	#N/A
MSTRG.10268.29	Female	Male	-11.1909	4.16774	0.000142205	0.0097381	#N/A
MSTRG.13508.2	Female	Male	-11.1697	4.14883	4.02283e-06	0.000562501	#N/A
Hpan_g9019.t1	Female	Male	-11.1179	4.09924	0.000539723	0.026113	#N/A
Hpan_g7542.t1	Female	Male	-11.0508	4.03221	3.79229e-06	0.000535876	#N/A
MSTRG.16938.2	Female	Male	-11.0285	4.0093	5.34606e-12	7.13886e-09	#N/A
Hpan_g1446.t1	Female	Male	-10.9856	3.96744	2.62155e-09	1.37282e-06	#N/A
MSTRG.10268.19	Female	Male	-10.9184	3.90414	0.00054301	0.0262245	#N/A
Hpan_g4969.t1	Female	Male	-10.9158	3.89899	1.88385e-08	6.1356e-06	#N/A
MSTRG.10268.20	Female	Male	-10.89	3.87186	0.0006303	0.0295842	#N/A
Hpan_g5694.t2	Female	Male	-10.8791	3.86246	2.68789e-10	2.17532e-07	#N/A
MSTRG.10268.26	Female	Male	-10.8515	3.83691	5.13736e-05	0.00446917	#N/A
Hpan_g10825.t1	Female	Male	-10.8495	3.83384	2.45419e-08	7.53379e-06	#N/A
Hpan_g8680.t1	Female	Male	-10.849	3.83304	8.53293e-05	0.00680266	#N/A
Hpan_g2869.t1	Female	Male	-10.8295	3.81434	5.11804e-08	1.45412e-05	#N/A
Hpan_g3756.t1	Female	Male	-10.823	3.80725	4.12925e-11	4.45926e-08	#N/A
Hpan_g14900.t1	Female	Male	-10.8071	3.7917	4.7212e-09	2.11273e-06	#N/A
MSTRG.15805.2	Female	Male	-10.7806	3.76807	0.000402813	0.0209706	#N/A
MSTRG.13745.6	Female	Male	-10.7704	3.75611	8.36216e-09	3.33326e-06	#N/A
Hpan_g5772.t1	Female	Male	-10.6699	3.65753	1.82479e-07	4.13006e-05	#N/A
Hpan_g5736.t1	Female	Male	-10.6592	3.64615	1.68246e-12	2.54516e-09	#N/A
Hpan_g15457.t1	Female	Male	-10.6484	3.63652	1.75672e-07	4.00997e-05	#N/A
Hpan_g4158.t1	Female	Male	-10.62	3.60697	0.000101199	0.00770002	#N/A
Hpan_g9886.t1	Female	Male	-10.5721	3.56083	9.77088e-13	2.17255e-09	#N/A
Hpan_g5777.t1	Female	Male	-10.5708	3.55983	1.42809e-08	5.08534e-06	#N/A
MSTRG.5826.1	Female	Male	-10.5493	3.53573	0.0010331	0.0418046	#N/A
Hpan_g6633.t1	Female	Male	-10.5268	3.51694	6.32271e-09	2.68033e-06	#N/A
Hpan_g7279.t1	Female	Male	-10.5227	3.51364	0.000155215	0.0103633	#N/A
Hpan_g5775.t2	Female	Male	-10.521	3.5121	9.30226e-07	0.000162376	#N/A
MSTRG.10640.1	Female	Male	-10.4944	3.48627	0.000447231	0.0228816	#N/A
MSTRG.17839.1	Female	Male	-10.4915	3.48193	3.01469e-13	1.00991e-09	#N/A
Hpan_g6084.t1	Female	Male	-10.4756	3.46646	1.91493e-10	1.70474e-07	#N/A
MSTRG.13023.1	Female	Male	-10.464	3.45506	4.44528e-10	3.20865e-07	#N/A
Hpan_g13292.t1	Female	Male	-10.4426	3.43545	3.70474e-06	0.00052629	#N/A
MSTRG.12047.4	Female	Male	-10.4207	3.4139	0.000379218	0.0199366	#N/A
Hpan_g4029.t1	Female	Male	-10.4199	3.41294	0.00011904	0.0086304	#N/A
Hpan_g8605.t1	Female	Male	-10.4086	3.40153	8.59735e-08	2.22922e-05	#N/A
MSTRG.13745.2	Female	Male	-10.3983	3.39015	1.29099e-09	8.20914e-07	#N/A
Hpan_g6747.t1	Female	Male	-10.3379	3.33135	0.000207437	0.0128838	#N/A
MSTRG.11449.1	Female	Male	-10.2879	3.28427	2.63785e-08	7.82766e-06	#N/A
MSTRG.4840.7	Female	Male	-10.2075	3.20674	9.84423e-05	0.00753324	#N/A
Hpan_g16004.t1	Female	Male	-10.2054	3.20437	7.44194e-05	0.00609669	#N/A
Hpan_g3887.t1	Female	Male	-10.1945	3.1936	1.27344e-07	3.03658e-05	#N/A
MSTRG.19264.12	Female	Male	-10.1937	3.19334	0.000885985	0.0376784	#N/A
Hpan_g4093.t1	Female	Male	-10.186	3.1845	9.72056e-08	2.44912e-05	#N/A
Hpan_g6519.t1	Female	Male	-10.1837	3.18124	4.28322e-11	4.45926e-08	#N/A
Hpan_g13867.t1	Female	Male	-10.1676	3.16562	0.000252294	0.0147657	#N/A
MSTRG.17922.1	Female	Male	-10.1528	5.98234	1.42098e-06	0.000232823	#N/A
Hpan_g3085.t1	Female	Male	-10.1488	8.02521	1.96417e-07	4.33862e-05	#N/A
Hpan_g7610.t1	Female	Male	-10.1382	3.13749	0.000185192	0.0118324	#N/A
Hpan_g15876.t1	Female	Male	-10.1353	3.13589	1.49807e-06	0.000242478	#N/A
MSTRG.8376.1	Female	Male	-10.1109	3.11352	0.000248061	0.0146345	#N/A
MSTRG.19611.1	Female	Male	-10.0971	3.10113	0.000159632	0.0105183	#N/A
Hpan_g15554.t1	Female	Male	-10.0843	3.08471	3.47183e-13	1.03025e-09	#N/A
Hpan_g12541.t1	Female	Male	-10.0701	3.07095	5.01128e-10	3.4317e-07	#N/A
MSTRG.8583.1	Female	Male	-10.0562	3.0574	6.88976e-13	1.75993e-09	#N/A
MSTRG.8574.2	Female	Male	-10.0439	3.04782	2.16547e-05	0.00229497	#N/A
Hpan_g1513.t1	Female	Male	-10.0331	3.03453	8.09234e-08	2.13982e-05	#N/A
MSTRG.15680.1	Female	Male	-9.98571	2.99103	0.000257648	0.0149039	#N/A
Hpan_g5773.t1	Female	Male	-9.95973	2.96691	5.71892e-05	0.0049111	#N/A
Hpan_g5775.t1	Female	Male	-9.9243	2.93189	6.15736e-05	0.00523709	#N/A
Hpan_g15805.t1	Female	Male	-9.89236	2.89806	0.000282101	0.0160812	#N/A
Hpan_g13222.t2	Female	Male	-9.83211	2.83948	2.28128e-15	3.0463e-11	#N/A
MSTRG.19802.1	Female	Male	-9.82357	2.83264	1.13619e-08	4.3349e-06	#N/A
MSTRG.3493.1	Female	Male	-9.80431	2.81371	5.53734e-14	2.95771e-10	#N/A
[truncated: 603 more rows]

## Sheet: H. Geodia barretti
Transcript_ID	logFC	logCPM	F	PValue	Description	GO Ids	GO names	Sex_loci
[truncated: 4,559 more rows]

[truncated: 1 more sheets: I. Geodia hentscheli]
