# Supplementary material for: Sponge genomes reveal a pre-metazoan origin of the sex determination toolkit and sex chromosomes
Source: Research Square preprint supplement (doi:10.21203/rs.3.rs-8554461/v1), 2026-02-12
Supplement: Supplementary file 12 [file 7f86d649219daaca0bff0708.xlsx]

## Sheet: Chreni.difCoverage.mismatch.0
chr	range	heterogametic	homogametic	ratio	ratio_scaled	diff	diff_scaled	start	end
OX359189.1	0	1.39968	1.34121	1.20443	0.895772	0.0584658	208.6	0	50000
OX359189.1	1	1.41531	1.40508	0.987538	0.73446	0.0102263	36.4864	50000	100000
OX359189.1	2	1.09977	1.01103	1.15741	0.860799	0.0887434	316.627	100000	150000
OX359189.1	3	1.20016	1.14971	0.985097	0.732645	0.0504563	180.023	150000	200000
OX359189.1	4	1.24514	1.22364	1.074	0.798762	0.0214955	76.6938	200000	250000
OX359189.1	5	1.03864	0.97949	1.04918	0.780304	0.059151	211.045	250000	300000
OX359189.1	6	1.51159	1.3035	1.1622	0.864361	0.208098	742.474	300000	350000
OX359189.1	7	1.43745	1.33691	1.18065	0.878087	0.100535	358.699	350000	400000
OX359189.1	8	1.8044	1.75655	1.02733	0.764053	0.0478479	170.716	400000	450000
OX359189.1	9	1.52417	1.4427	1.05396	0.783857	0.0814666	290.664	450000	500000
OX359189.1	10	1.57401	1.70617	0.943981	0.702066	-0.132155	-471.516	500000	550000
OX359189.1	11	1.34814	1.48223	0.878616	0.653452	-0.134092	-478.426	550000	600000
OX359189.1	12	1.04601	1.26528	0.842908	0.626895	-0.219269	-782.328	600000	650000
OX359189.1	13	1.15085	1.30626	0.866062	0.644115	-0.155415	-554.505	650000	700000
OX359189.1	14	1.29306	1.33113	0.987392	0.734352	-0.0380698	-135.829	700000	750000
OX359189.1	15	1.19937	1.23821	0.944641	0.702557	-0.0388431	-138.588	750000	800000
OX359189.1	16	1.07279	0.982395	1.2862	0.956582	0.0903908	322.505	800000	850000
OX359189.1	17	0.982854	0.976964	0.955373	0.710538	0.00589005	21.0151	850000	900000
OX359189.1	18	0.935266	1.30011	0.709936	0.528	-0.364845	-1301.73	900000	950000
OX359189.1	19	0.781182	0.723199	1.24509	0.926012	0.0579831	206.878	950000	1000000
OX359189.1	20	0.325717	0.178096	19.0335	14.1558	0.147621	526.698	1000000	1050000
OX359189.1	21	1.37456	1.28791	1.13618	0.845006	0.0866503	309.159	1050000	1100000
OX359189.1	22	1.4516	1.42005	1.04791	0.779363	0.0315493	112.565	1100000	1150000
OX359189.1	23	1.00296	0.80197	1.31561	0.978453	0.200993	717.122	1150000	1200000
OX359189.1	24	0.538626	0.555665	0.985185	0.732711	-0.0170391	-60.7938	1200000	1250000
OX359189.1	25	1.03244	1.13834	0.896378	0.666662	-0.105909	-377.871	1250000	1300000
OX359189.1	26	1.01987	1.06446	0.978726	0.727906	-0.0445902	-159.093	1300000	1350000
OX359189.1	27	0.95246	0.94409	1.03579	0.770349	0.00837034	29.8645	1350000	1400000
OX359189.1	28	0.991979	0.836813	1.26132	0.938082	0.155167	553.619	1400000	1450000
OX359189.1	29	1.31167	1.07391	1.24529	0.926155	0.237764	848.317	1450000	1500000
OX359189.1	30	0.826356	0.696729	1.21045	0.900246	0.129627	462.496	1500000	1550000
OX359189.1	31	1.14877	0.820578	1.65448	1.23049	0.328196	1170.97	1550000	1600000
OX359189.1	32	0.844685	0.318202	7.27365	5.40962	0.526483	1878.44	1600000	1650000
OX359189.1	33	0.525871	0.780337	0.867422	0.645127	-0.254467	-907.911	1650000	1700000
OX359189.1	34	0.789258	0.931871	0.867487	0.645175	-0.142613	-508.829	1700000	1750000
OX359189.1	35	0.241934	0.298641	0.541274	0.402561	-0.0567071	-202.325	1750000	1800000
OX359189.1	36	0.596344	0.567268	1.25765	0.935352	0.029076	103.74	1800000	1850000
OX359189.1	37	0.61563	0.675595	0.929449	0.691258	-0.0599647	-213.948	1850000	1900000
OX359189.1	38	0.490544	0.786959	0.601633	0.447452	-0.296416	-1057.58	1900000	1950000
OX359189.1	39	0.3848	0.685519	0.547639	0.407295	-0.300719	-1072.94	1950000	2000000
OX359189.1	40	0.332506	0.640405	0.481111	0.357816	-0.307899	-1098.55	2000000	2050000
OX359189.1	41	0.104643	0.507725	0.200706	0.149271	-0.403082	-1438.16	2050000	2100000
OX359189.1	42	0.10172	0.464688	0.488371	0.363215	-0.362969	-1295.04	2100000	2150000
OX359189.1	43	0.171006	0.207968	0.938012	0.697626	-0.0369618	-131.876	2150000	2200000
OX359189.1	44	0.0550168	0.230425	0.302359	0.224873	-0.175408	-625.838	2200000	2250000
OX359189.1	45	0.597601	0.622996	0.880762	0.655048	-0.0253956	-90.6088	2250000	2300000
OX359189.1	46	0.639775	0.741331	0.999464	0.74333	-0.101556	-362.342	2300000	2350000
OX359189.1	47	0.634258	0.648135	1.19369	0.887783	-0.0138765	-49.5098	2350000	2400000
OX359189.1	48	1.13336	1.13927	1.00988	0.751073	-0.00590564	-21.0707	2400000	2450000
OX359189.1	49	0.927218	0.854546	1.11906	0.832274	0.0726714	259.284	2450000	2500000
OX359189.1	50	0.76485	0.763401	0.99526	0.740204	0.0014493	5.17097	2500000	2550000
OX359189.1	51	0.645187	0.657564	1.00309	0.746025	-0.0123776	-44.1619	2550000	2600000
OX359189.1	52	0.839352	0.995817	0.853854	0.635036	-0.156464	-558.248	2600000	2650000
OX359189.1	53	0.836717	0.910765	0.907374	0.67484	-0.0740486	-264.198	2650000	2700000
OX359189.1	54	1.02301	1.09391	0.941335	0.700098	-0.0708995	-252.962	2700000	2750000
OX359189.1	55	1.21635	1.26621	0.953715	0.709305	-0.0498543	-177.875	2750000	2800000
OX359189.1	56	0.910575	0.728577	1.49583	1.11249	0.181998	649.349	2800000	2850000
OX359189.1	57	1.0229	0.883397	1.16375	0.865514	0.139499	497.718	2850000	2900000
OX359189.1	58	1.03492	0.649078	1.66906	1.24133	0.38584	1376.64	2900000	2950000
OX359189.1	59	0.709631	0.776854	1.22996	0.91476	-0.0672232	-239.845	2950000	3000000
OX359189.1	60	0.613326	1.16435	0.560976	0.417214	-0.551021	-1965.99	3000000	3050000
OX359189.1	61	0.760024	0.945633	0.898753	0.668428	-0.185609	-662.235	3050000	3100000
OX359189.1	62	0.495924	0.422627	2.11042	1.56958	0.0732963	261.514	3100000	3150000
OX359189.1	63	0.714772	0.653072	1.34566	1.00081	0.0616998	220.139	3150000	3200000
OX359189.1	64	1.29527	1.34293	0.962722	0.716004	-0.0476573	-170.036	3200000	3250000
OX359189.1	65	1.09184	1.11339	0.968963	0.720646	-0.0215555	-76.9078	3250000	3300000
OX359189.1	66	1.62191	1.55375	1.04679	0.778529	0.0681648	243.205	3300000	3350000
OX359189.1	67	2.27072	2.17686	1.04826	0.779618	0.0938611	334.887	3350000	3400000
OX359189.1	68	1.43816	1.47725	0.993442	0.738851	-0.0390904	-139.471	3400000	3450000
OX359189.1	69	1.86552	1.49833	1.30034	0.967101	0.367187	1310.09	3450000	3500000
OX359189.1	70	1.5375	1.66955	0.914337	0.680018	-0.132051	-471.143	3500000	3550000
OX359189.1	71	2.03627	2.09642	0.978187	0.727506	-0.0601541	-214.624	3550000	3600000
OX359189.1	72	1.37383	1.57179	0.878231	0.653166	-0.197959	-706.296	3600000	3650000
OX359189.1	73	2.02049	1.99717	1.01245	0.752986	0.0233241	83.2181	3650000	3700000
OX359189.1	74	2.11351	2.04925	1.03467	0.769514	0.0642641	229.288	3700000	3750000
OX359189.1	75	1.59191	1.53332	1.0283	0.764779	0.0585953	209.062	3750000	3800000
OX359189.1	76	1.94997	1.74908	1.11426	0.828708	0.200892	716.762	3800000	3850000
OX359189.1	77	1.61365	1.55589	1.03571	0.77029	0.0577556	206.066	3850000	3900000
OX359189.1	78	1.75116	1.70299	1.03083	0.766662	0.0481675	171.857	3900000	3950000
OX359189.1	79	1.56888	1.38697	1.1383	0.846588	0.181913	649.045	3950000	4000000
OX359189.1	80	1.61843	1.39495	1.15897	0.861961	0.223485	797.37	4000000	4050000
OX359189.1	81	1.60608	1.34818	1.22561	0.911525	0.257902	920.168	4050000	4100000
OX359189.1	82	1.61846	1.41662	1.14455	0.851232	0.201833	720.121	4100000	4150000
OX359189.1	83	1.51617	1.34116	1.13721	0.845773	0.175015	624.435	4150000	4200000
OX359189.1	84	1.01411	0.902619	1.13027	0.840614	0.111495	397.802	4200000	4250000
OX359189.1	85	0.701969	0.603029	0.886104	0.659021	0.0989398	353.007	4250000	4300000
OX359189.1	86	0.908891	0.774591	1.05618	0.785512	0.134301	479.171	4300000	4350000
OX359189.1	87	1.55498	1.39103	1.11362	0.82823	0.16395	584.958	4350000	4400000
OX359189.1	88	1.37224	1.27901	1.07434	0.799019	0.0932281	332.628	4400000	4450000
OX359189.1	89	1.42376	1.26231	1.13038	0.840695	0.161452	576.044	4450000	4500000
OX359189.1	90	1.08434	0.97498	1.1161	0.830079	0.109358	390.179	4500000	4550000
OX359189.1	91	1.21825	1.10449	1.09984	0.817985	0.113762	405.891	4550000	4600000
OX359189.1	92	1.942	1.79359	1.10161	0.819296	0.148404	529.491	4600000	4650000
OX359189.1	93	2.23448	2.07979	1.07566	0.799997	0.154694	551.932	4650000	4700000
OX359189.1	94	2.16201	2.1236	1.01606	0.75567	0.038408	137.036	4700000	4750000
OX359189.1	95	1.75083	1.76065	1.01588	0.755538	-0.0098227	-35.0464	4750000	4800000
OX359189.1	96	1.84179	1.63466	1.15083	0.855908	0.207131	739.022	4800000	4850000
OX359189.1	97	1.65473	1.45534	1.13174	0.841708	0.199391	711.407	4850000	4900000
OX359189.1	98	1.51201	1.30703	1.16295	0.864921	0.204982	731.356	4900000	4950000
OX359189.1	99	1.65989	1.42875	1.1624	0.864513	0.231146	824.707	4950000	5000000
OX359189.1	100	1.48262	1.39195	1.06876	0.794864	0.0906712	323.506	5000000	5050000
OX359189.1	101	1.38837	1.44896	0.956755	0.711566	-0.0605963	-216.201	5050000	5100000
OX359189.1	102	1.31728	1.62444	0.809694	0.602192	-0.307167	-1095.94	5100000	5150000
OX359189.1	103	0.738368	1.08694	0.601749	0.447538	-0.348569	-1243.66	5150000	5200000
OX359189.1	104	0.85046	1.23886	0.679885	0.50565	-0.388405	-1385.79	5200000	5250000
OX359189.1	105	0.822383	1.32875	0.611436	0.454742	-0.50637	-1806.68	5250000	5300000
OX359189.1	106	0.627175	0.636612	1.01241	0.75296	-0.00943636	-33.668	5300000	5350000
OX359189.1	107	1.13228	1.08006	1.05312	0.783234	0.0522194	186.313	5350000	5400000
OX359189.1	108	1.03507	1.11971	0.965511	0.718079	-0.0846402	-301.987	5400000	5450000
OX359189.1	109	1.13695	1.29563	0.834026	0.620289	-0.158686	-566.174	5450000	5500000
OX359189.1	110	0.989105	1.12705	0.846646	0.629675	-0.137941	-492.158	5500000	5550000
OX359189.1	111	1.45509	1.30398	1.15133	0.856275	0.151112	539.15	5550000	5600000
OX359189.1	112	1.06449	1.03162	1.03385	0.768901	0.0328695	117.275	5600000	5650000
OX359189.1	113	1.03977	0.940914	1.13962	0.847569	0.0988593	352.72	5650000	5700000
OX359189.1	114	0.994917	0.784704	1.29658	0.964302	0.210213	750.019	5700000	5750000
OX359189.1	115	0.946376	0.725708	1.37811	1.02494	0.220667	787.318	5750000	5800000
OX359189.1	116	0.927415	0.623039	1.60264	1.19193	0.304375	1085.98	5800000	5850000
OX359189.1	117	0.454198	0.371024	1.81132	1.34713	0.083174	296.756	5850000	5900000
OX359189.1	118	0.335667	0.292095	1.13087	0.841062	0.043572	155.46	5900000	5950000
OX359189.1	119	0.663388	0.662882	1.06605	0.792855	0.000505839	1.80478	5950000	6000000
OX359189.1	120	0.98778	0.707232	1.44803	1.07694	0.280547	1000.96	6000000	6050000
OX359189.1	121	0.824643	0.630733	1.2634	0.939625	0.19391	691.852	6050000	6100000
OX359189.1	122	0.763659	0.64336	1.15558	0.859441	0.120299	429.214	6100000	6150000
OX359189.1	123	1.0709	0.968699	1.20305	0.894746	0.102197	364.63	6150000	6200000
OX359189.1	124	0.709386	0.545264	1.48469	1.10421	0.164122	585.57	6200000	6250000
OX359189.1	125	0.737692	0.683411	1.10362	0.820792	0.0542807	193.668	6250000	6300000
OX359189.1	126	0.561371	0.533011	1.10976	0.825359	0.0283598	101.185	6300000	6350000
OX359189.1	127	0.365713	0.497425	0.81784	0.608251	-0.131712	-469.935	6350000	6400000
OX359189.1	128	0.517392	0.638914	0.779891	0.580027	-0.121522	-433.578	6400000	6450000
OX359189.1	129	0.6406	0.481365	1.29769	0.965128	0.159235	568.133	6450000	6500000
OX359189.1	130	0.383419	0.267908	1.48058	1.10115	0.115511	412.13	6500000	6550000
OX359189.1	131	0.656118	0.450168	1.45705	1.08365	0.20595	734.809	6550000	6600000
OX359189.1	132	0.717421	1.0797	0.650559	0.48384	-0.362278	-1292.57	6600000	6650000
OX359189.1	133	0.917535	1.13695	0.838997	0.623986	-0.219419	-782.866	6650000	6700000
OX359189.1	134	0.770405	0.570657	1.34146	0.997683	0.199748	712.68	6700000	6750000
OX359189.1	135	0.663334	0.322437	9.23374	6.86739	0.340897	1216.28	6750000	6800000
OX359189.1	136	0.231388	0.18131	1.50969	1.1228	0.0500784	178.675	6800000	6850000
OX359189.1	137	0.360913	0.258564	1.66166	1.23582	0.102348	365.168	6850000	6900000
OX359189.1	138	0.28437	0.250205	1.09766	0.81636	0.0341652	121.898	6900000	6950000
OX359189.1	139	0.667793	0.744947	0.914308	0.679997	-0.077154	-275.278	6950000	7000000
OX359189.1	140	0.95411	0.811017	1.3881	1.03237	0.143093	510.542	7000000	7050000
OX359189.1	141	0.386536	0.37951	1.44942	1.07798	0.00702602	25.0681	7050000	7100000
OX359189.1	142	0.49813	0.809986	0.576762	0.428954	-0.311856	-1112.67	7100000	7150000
OX359189.1	143	0.587474	0.624179	1.12453	0.836347	-0.0367047	-130.958	7150000	7200000
OX359189.1	144	0.705635	0.701245	0.710164	0.52817	0.00438955	15.6615	7200000	7250000
OX359189.1	145	0.670644	0.734037	0.733938	0.545851	-0.0633931	-226.18	7250000	7300000
OX359189.1	146	0.868533	0.865974	1.07111	0.796614	0.00255854	9.12862	7300000	7350000
OX359189.1	147	0.329323	0.210106	8.9419	6.65034	0.119217	425.356	7350000	7400000
OX359189.1	148	0.760611	0.79848	1.12704	0.838215	-0.0378684	-135.11	7400000	7450000
OX359189.1	149	0.888203	0.992662	0.909441	0.676377	-0.104459	-372.7	7450000	7500000
OX359189.1	150	0.509355	0.387787	9.07227	6.74731	0.121568	433.741	7500000	7550000
OX359189.1	151	0.610566	0.527867	3.51342	2.61303	0.0826983	295.059	7550000	7600000
OX359189.1	152	0.499341	0.436453	2.02012	1.50242	0.0628881	224.378	7600000	7650000
OX359189.1	153	1.32544	1.15582	1.17698	0.875353	0.169628	605.215	7650000	7700000
OX359189.1	154	1.01796	0.595833	1.99761	1.48568	0.422129	1506.11	7700000	7750000
OX359189.1	155	0.340133	0.680747	0.464978	0.345818	-0.340614	-1215.28	7750000	7800000
OX359189.1	156	0.645225	1.09492	0.580103	0.431439	-0.449693	-1604.46	7800000	7850000
OX359189.1	157	0.464031	0.699512	0.604467	0.44956	-0.23548	-840.169	7850000	7900000
OX359189.1	158	1.11231	1.34578	0.837273	0.622704	-0.233466	-832.984	7900000	7950000
OX359189.1	159	1.10144	1.31262	0.838169	0.623371	-0.211179	-753.466	7950000	8000000
OX359189.1	160	1.16875	1.27997	0.94006	0.69915	-0.111217	-396.811	8000000	8050000
OX359189.1	161	0.780542	0.738432	1.07525	0.799691	0.0421105	150.246	8050000	8100000
OX359189.1	162	0.931918	0.854067	1.17529	0.874093	0.0778508	277.764	8100000	8150000
OX359189.1	163	0.512937	0.458165	1.45414	1.08149	0.0547717	195.42	8150000	8200000
OX359189.1	164	0.701783	0.387305	3.40087	2.52933	0.314479	1122.03	8200000	8250000
OX359189.1	165	0.950652	0.61684	1.6062	1.19458	0.333812	1191.01	8250000	8300000
OX359189.1	166	0.278204	0.250736	1.32328	0.984161	0.0274684	98.0043	8300000	8350000
OX359189.1	167	0.084917	0.152736	0.653877	0.486307	-0.0678188	-241.97	8350000	8400000
OX359189.1	168	0.163363	0.196835	0.894079	0.664953	-0.0334723	-119.426	8400000	8450000
OX359189.1	169	0.406907	0.337187	1.72013	1.27931	0.0697198	248.753	8450000	8500000
OX359189.1	170	0.323111	0.0406329	12.1637	9.04651	0.282478	1007.85	8500000	8550000
OX359189.1	171	0.292165	0.12565	2.83095	2.10546	0.166514	594.106	8550000	8600000
OX359189.1	172	0.223401	0.222813	1.0462	0.778089	0.00058732	2.0955	8600000	8650000
OX359189.1	173	0.222225	0.231802	1.18345	0.880166	-0.00957732	-34.1709	8650000	8700000
OX359189.1	174	0.169785	0.0824317	2.7178	2.02131	0.0873534	311.668	8700000	8750000
OX359189.1	175	0.326025	0.215248	1.52791	1.13635	0.110777	395.242	8750000	8800000
OX359189.1	176	0.178259	0.154819	1.33097	0.989882	0.0234397	83.6304	8800000	8850000
OX359189.1	177	0.173461	0.168139	0.977562	0.727041	0.00532199	18.9883	8850000	8900000
OX359189.1	178	0.118838	0.394538	0.377871	0.281034	-0.2757	-983.668	8900000	8950000
OX359189.1	179	0.433205	0.971024	0.405941	0.30191	-0.537819	-1918.88	8950000	9000000
OX359189.1	180	0.488477	0.75586	0.622287	0.462813	-0.267383	-953.997	9000000	9050000
OX359189.1	181	0.747332	1.02832	0.753404	0.560328	-0.280987	-1002.53	9050000	9100000
OX359189.1	182	0.838287	0.924826	0.8641	0.642656	-0.0865395	-308.764	9100000	9150000
OX359189.1	183	0.882885	1.01399	0.8505	0.632541	-0.131102	-467.758	9150000	9200000
OX359189.1	184	0.34296	0.394796	0.962484	0.715827	-0.0518352	-184.943	9200000	9250000
OX359189.1	185	0.670303	0.717469	0.962143	0.715574	-0.0471662	-168.284	9250000	9300000
OX359189.1	186	0.161219	0.210776	0.847942	0.630639	-0.049557	-176.814	9300000	9350000
OX359189.1	187	0.302816	0.391039	0.925035	0.687975	-0.0882232	-314.771	9350000	9400000
OX359189.1	188	0.134409	0.13812	1.19294	0.887226	-0.00371157	-13.2425	9400000	9450000
OX359189.1	189	0.564688	0.521034	1.09954	0.817756	0.043654	155.753	9450000	9500000
OX359189.1	190	0.279387	0.497666	0.502838	0.373975	-0.218279	-778.796	9500000	9550000
OX359189.1	191	0.555912	0.465787	1.3631	1.01378	0.0901256	321.559	9550000	9600000
OX359189.1	192	0.456719	0.505762	0.88979	0.661762	-0.0490428	-174.98	9600000	9650000
OX359189.1	193	0.690737	0.543397	1.71756	1.2774	0.14734	525.695	9650000	9700000
OX359189.1	194	0.462589	0.482744	0.932819	0.693764	-0.0201542	-71.9082	9700000	9750000
OX359189.1	195	0.286544	0.318832	1.0034	0.74626	-0.0322881	-115.201	9750000	9800000
OX359189.1	196	0.283637	0.448059	0.793936	0.590473	-0.164422	-586.641	9800000	9850000
OX359189.1	197	0.381541	0.349485	1.12752	0.838567	0.032056	114.373	9850000	9900000
OX359189.1	198	0.32387	0.0755065	4.99206	3.71274	0.248363	886.135	9900000	9950000
OX359189.1	199	0.301464	0.0765538	6.55864	4.87785	0.22491	802.456	9950000	10000000
OX359189.1	200	0.299972	0.281243	1.06252	0.790229	0.0187291	66.8235	10000000	10050000
OX359189.1	201	0.337713	0.145795	2.31453	1.72138	0.191917	684.74	10050000	10100000
OX359189.1	202	0.465752	0.17723	2.20052	1.63659	0.288522	1029.42	10100000	10150000
OX359189.1	203	0.265195	0.0707259	4.38163	3.25875	0.194469	693.847	10150000	10200000
OX359189.1	204	0.500575	0.246634	3.86259	2.87272	0.253941	906.034	10200000	10250000
OX359189.1	205	0.483537	0.274823	1.94534	1.44681	0.208714	744.669	10250000	10300000
OX359189.1	206	0.418139	0.254468	13.3898	9.95838	0.163672	583.964	10300000	10350000
OX359189.1	207	0.729064	0.526493	3.31647	2.46655	0.202571	722.753	10350000	10400000
OX359189.1	208	0.0456401	0.0860467	0.70051	0.520989	-0.0404066	-144.167	10400000	10410000
OX359190.1	0	0.923175	0.917396	1.00651	0.748574	0.00577902	20.619	0	50000
OX359190.1	1	0.647651	0.710588	1.1928	0.887119	-0.0629374	-224.554	50000	100000
OX359190.1	2	0.750004	0.643223	1.10709	0.823372	0.106781	380.984	100000	150000
OX359190.1	3	0.370416	0.307989	1.2464	0.926986	0.0624274	222.734	150000	200000
OX359190.1	4	0.207148	0.262794	0.827227	0.615232	-0.0556462	-198.54	200000	250000
OX359190.1	5	0.126615	0.144015	1.2254	0.911365	-0.0174001	-62.0819	250000	300000
OX359190.1	6	0.176271	0.120081	1.4974	1.11366	0.0561895	200.478	300000	350000
OX359190.1	7	0.262752	0.348906	0.793638	0.590252	-0.0861538	-307.388	350000	400000
OX359190.1	8	0.401174	0.857164	0.485269	0.360909	-0.455991	-1626.93	400000	450000
OX359190.1	9	0.566575	0.992685	0.553692	0.411797	-0.426111	-1520.32	450000	500000
OX359190.1	10	0.200039	0.300402	0.671861	0.499682	-0.100363	-358.086	500000	550000
OX359190.1	11	0.402339	0.277381	1.19105	0.885821	0.124958	445.838	550000	600000
OX359190.1	12	0.868784	0.483308	2.04361	1.51989	0.385476	1375.34	600000	650000
OX359190.1	13	1.03884	0.75362	2.05351	1.52725	0.285218	1017.63	650000	700000
OX359190.1	14	0.968364	0.949703	1.01919	0.758004	0.0186611	66.5808	700000	750000
OX359190.1	15	0.503677	0.717223	0.630272	0.468751	-0.213545	-761.907	750000	800000
OX359190.1	16	0.836753	0.809859	1.02436	0.761848	0.0268937	95.9539	800000	850000
OX359190.1	17	1.0005	0.986469	1.01543	0.755202	0.0140331	50.0685	850000	900000
OX359190.1	18	1.24697	1.17445	1.07386	0.79866	0.0725166	258.732	900000	950000
OX359190.1	19	0.648167	0.626423	0.997953	0.742207	0.0217445	77.5821	950000	1000000
OX359190.1	20	0.666798	0.450324	1.62461	1.20827	0.216474	772.357	1000000	1050000
OX359190.1	21	0.272812	0.199027	1.39948	1.04084	0.0737852	263.258	1050000	1100000
OX359190.1	22	0.3637	0.269571	2.64215	1.96504	0.0941285	335.841	1100000	1150000
OX359190.1	23	0.383187	0.249358	2.62545	1.95262	0.133829	477.489	1150000	1200000
OX359190.1	24	0.475548	0.370743	1.37711	1.02419	0.104805	373.934	1200000	1250000
OX359190.1	25	0.201974	0.220277	1.1604	0.863024	-0.0183035	-65.3049	1250000	1300000
OX359190.1	26	0.258977	0.132438	3.63315	2.70208	0.126539	451.477	1300000	1350000
OX359190.1	27	0.28095	0.158499	1.92706	1.43321	0.12245	436.891	1350000	1400000
OX359190.1	28	0.101304	0.137758	0.73805	0.548909	-0.0364537	-130.063	1400000	1450000
OX359190.1	29	0.129118	0.111479	1.22965	0.914526	0.0176381	62.9309	1450000	1500000
OX359190.1	30	0.477471	0.466225	1.7531	1.30383	0.0112457	40.1236	1500000	1550000
OX359190.1	31	0.756235	0.804027	1.34817	1.00268	-0.0477921	-170.517	1550000	1600000
OX359190.1	32	0.308962	0.266098	1.22092	0.908032	0.0428636	152.933	1600000	1650000
OX359190.1	33	0.815788	0.647685	1.23123	0.915699	0.168103	599.776	1650000	1700000
OX359190.1	34	0.525047	0.562949	0.898584	0.668303	-0.0379022	-135.231	1700000	1750000
OX359190.1	35	0.633881	0.645634	1.01708	0.756428	-0.011753	-41.9335	1750000	1800000
OX359190.1	36	0.341494	0.370374	1.53444	1.14121	-0.0288803	-103.042	1800000	1850000
OX359190.1	37	0.24086	0.201791	1.70488	1.26797	0.0390691	139.394	1850000	1900000
OX359190.1	38	0.41304	0.26799	2.25232	1.67511	0.145049	517.521	1900000	1950000
OX359190.1	39	0.292007	0.112444	4.40182	3.27376	0.179563	640.662	1950000	2000000
OX359190.1	40	0.0861858	0.0856512	1.5764	1.17241	0.000534661	1.90762	2000000	2050000
OX359190.1	41	0.562095	0.305239	2.5226	1.87613	0.256856	916.435	2050000	2100000
OX359190.1	42	0.161291	0.0774177	3.03391	2.25641	0.0838734	299.252	2100000	2150000
OX359190.1	43	0.241332	0.182674	1.35257	1.00594	0.058658	209.286	2150000	2200000
OX359190.1	44	0.514577	0.474756	1.31943	0.981297	0.039821	142.077	2200000	2250000
OX359190.1	45	0.646313	0.866359	0.7243	0.538683	-0.220046	-785.102	2250000	2300000
OX359190.1	46	0.377045	0.454827	0.866585	0.644504	-0.0777819	-277.518	2300000	2350000
OX359190.1	47	0.807052	0.726367	1.12341	0.835509	0.0806854	287.877	2350000	2400000
OX359190.1	48	1.05994	1.06967	1.04017	0.773602	-0.00972337	-34.692	2400000	2450000
OX359190.1	49	0.731191	0.752515	1.14609	0.852378	-0.0213244	-76.0834	2450000	2500000
OX359190.1	50	0.124074	0.163705	1.42941	1.06309	-0.0396311	-141.4	2500000	2550000
OX359190.1	51	0.282017	0.217177	1.43514	1.06736	0.0648404	231.344	2550000	2600000
OX359190.1	52	0.328909	0.573934	0.585498	0.435451	-0.245025	-874.224	2600000	2650000
OX359190.1	53	0.290419	0.470082	0.636853	0.473646	-0.179663	-641.018	2650000	2700000
OX359190.1	54	0.495684	0.631081	0.797936	0.593448	-0.135397	-483.082	2700000	2750000
OX359190.1	55	0.643374	0.720623	0.874737	0.650567	-0.0772496	-275.619	2750000	2800000
OX359190.1	56	0.593447	0.719298	0.80638	0.599728	-0.12585	-449.021	2800000	2850000
OX359190.1	57	0.288707	0.247003	1.29731	0.964849	0.0417042	148.796	2850000	2900000
OX359190.1	58	0.473545	0.218665	3.40438	2.53193	0.25488	909.384	2900000	2950000
OX359190.1	59	0.493416	0.440372	1.17454	0.873539	0.0530443	189.257	2950000	3000000
OX359190.1	60	0.62639	0.284946	2.27877	1.69479	0.341444	1218.24	3000000	3050000
OX359190.1	61	0.865387	0.414856	2.90576	2.1611	0.450531	1607.45	3050000	3100000
OX359190.1	62	1.32091	0.989565	1.58147	1.17619	0.331348	1182.22	3100000	3150000
OX359190.1	63	1.52638	1.31282	1.17265	0.872134	0.213559	761.957	3150000	3200000
OX359190.1	64	1.31901	1.0619	1.23276	0.916838	0.257104	917.32	3200000	3250000
OX359190.1	65	0.854521	1.00937	0.848781	0.631263	-0.154852	-552.498	3250000	3300000
OX359190.1	66	0.838099	0.792244	1.21575	0.904191	0.0458556	163.608	3300000	3350000
OX359190.1	67	0.953564	0.675897	1.68337	1.25197	0.277667	990.687	3350000	3400000
OX359190.1	68	0.850307	0.884412	1.04606	0.777985	-0.0341051	-121.683	3400000	3450000
OX359190.1	69	0.339502	0.560837	0.582071	0.432903	-0.221335	-789.7	3450000	3500000
OX359190.1	70	0.642389	0.563027	1.07901	0.802494	0.0793623	283.157	3500000	3550000
OX359190.1	71	0.760979	1.03982	0.781805	0.581451	-0.27884	-994.872	3550000	3600000
OX359190.1	72	1.04283	1.54766	0.652018	0.484925	-0.504835	-1801.2	3600000	3650000
OX359190.1	73	1.33135	1.57291	0.846648	0.629676	-0.241558	-861.852	3650000	3700000
OX359190.1	74	1.24118	1.57841	0.786194	0.584715	-0.337231	-1203.2	3700000	3750000
OX359190.1	75	0.397741	1.27898	0.309895	0.230478	-0.881242	-3144.18	3750000	3800000
OX359190.1	76	0.370603	1.2526	0.298588	0.222068	-0.881993	-3146.86	3800000	3850000
OX359190.1	77	0.278633	1.20503	0.23158	0.172233	-0.926397	-3305.29	3850000	3900000
OX359190.1	78	0.217023	1.09206	0.19701	0.146522	-0.875037	-3122.04	3900000	3950000
OX359190.1	79	0.414682	1.20378	0.336474	0.250246	-0.789097	-2815.42	3950000	4000000
OX359190.1	80	1.02212	1.5338	0.625649	0.465313	-0.511687	-1825.65	4000000	4050000
OX359190.1	81	1.3072	1.84447	0.707525	0.526206	-0.537269	-1916.92	4050000	4100000
OX359190.1	82	1.15257	1.74722	0.642917	0.478156	-0.594649	-2121.65	4100000	4150000
OX359190.1	83	1.20556	1.82432	0.65152	0.484554	-0.61876	-2207.67	4150000	4200000
OX359190.1	84	1.14911	1.8112	0.628093	0.467131	-0.662096	-2362.29	4200000	4250000
OX359190.1	85	1.05029	1.72019	0.610321	0.453913	-0.669896	-2390.12	4250000	4300000
OX359190.1	86	1.16523	1.7564	0.660774	0.491436	-0.591166	-2109.22	4300000	4350000
OX359190.1	87	1.28215	1.83267	0.696647	0.518116	-0.550521	-1964.2	4350000	4400000
OX359190.1	88	1.42836	2.00418	0.709819	0.527913	-0.575816	-2054.45	4400000	4450000
OX359190.1	89	1.12351	1.73683	0.646856	0.481085	-0.613319	-2188.26	4450000	4500000
OX359190.1	90	1.40108	1.95664	0.714111	0.531105	-0.555555	-1982.16	4500000	4550000
OX359190.1	91	0.96075	1.85374	0.512049	0.380826	-0.892988	-3186.09	4550000	4600000
OX359190.1	92	1.2515	1.6802	0.736426	0.547701	-0.428698	-1529.55	4600000	4650000
OX359190.1	93	0.880366	1.81894	0.481153	0.357847	-0.938577	-3348.75	4650000	4700000
OX359190.1	94	0.777823	1.60259	0.484799	0.360559	-0.824767	-2942.68	4700000	4750000
OX359190.1	95	0.776538	1.64091	0.469743	0.349361	-0.864375	-3084	4750000	4800000
OX359190.1	96	0.538553	1.06256	0.442141	0.328833	-0.524003	-1869.59	4800000	4850000
OX359190.1	97	1.45606	2.19444	0.658997	0.490115	-0.738372	-2634.44	4850000	4900000
OX359190.1	98	1.27805	1.49594	0.863938	0.642536	-0.217888	-777.403	4900000	4950000
OX359190.1	99	1.13661	1.36278	0.823972	0.612812	-0.226164	-806.93	4950000	5000000
OX359190.1	100	1.57261	1.7976	0.85687	0.637279	-0.224989	-802.739	5000000	5050000
OX359190.1	101	1.84794	2.06964	0.893144	0.664257	-0.221696	-790.987	5050000	5100000
OX359190.1	102	1.97122	2.12562	0.927035	0.689462	-0.154399	-550.881	5100000	5150000
OX359190.1	103	1.14005	1.3257	0.865828	0.643941	-0.185655	-662.399	5150000	5200000
OX359190.1	104	1.16985	1.44627	0.813529	0.605045	-0.276425	-986.256	5200000	5250000
OX359190.1	105	1.16977	1.70963	0.6873	0.511164	-0.539858	-1926.16	5250000	5300000
OX359190.1	106	0.860179	1.39194	0.611125	0.454511	-0.531758	-1897.26	5300000	5350000
OX359190.1	107	1.05062	1.45328	0.720471	0.535835	-0.402668	-1436.68	5350000	5400000
OX359190.1	108	1.28112	1.51583	0.838236	0.62342	-0.234715	-837.438	5400000	5450000
OX359190.1	109	1.21772	1.40597	0.863983	0.642569	-0.188249	-671.653	5450000	5500000
OX359190.1	110	1.48288	1.49066	0.986887	0.733976	-0.00778383	-27.7719	5500000	5550000
OX359190.1	111	1.35767	1.38783	0.956332	0.711252	-0.0301549	-107.589	5550000	5600000
OX359190.1	112	1.23293	1.35692	0.888954	0.661141	-0.123984	-442.361	5600000	5650000
OX359190.1	113	0.940826	1.25326	0.72992	0.542862	-0.312431	-1114.72	5650000	5700000
OX359190.1	114	1.01506	1.2026	0.846946	0.629898	-0.18754	-669.124	5700000	5750000
OX359190.1	115	1.17174	1.4282	0.819249	0.609299	-0.256458	-915.015	5750000	5800000
OX359190.1	116	0.873695	1.11762	0.771575	0.573843	-0.243927	-870.306	5800000	5850000
OX359190.1	117	0.922706	1.25835	0.715391	0.532056	-0.335644	-1197.54	5850000	5900000
OX359190.1	118	1.19886	1.36603	0.870688	0.647555	-0.167168	-596.44	5900000	5950000
OX359190.1	119	1.1215	1.30627	0.856656	0.63712	-0.184773	-659.252	5950000	6000000
OX359190.1	120	1.19141	1.38895	0.85077	0.632742	-0.197545	-704.822	6000000	6050000
OX359190.1	121	1.33236	1.53095	0.874706	0.650544	-0.198597	-708.575	6050000	6100000
OX359190.1	122	1.50349	1.69077	0.887867	0.660332	-0.187278	-668.187	6100000	6150000
OX359190.1	123	2.05693	2.28524	0.899617	0.669071	-0.228317	-814.612	6150000	6200000
OX359190.1	124	1.62132	2.08964	0.766582	0.570129	-0.468313	-1670.89	6200000	6250000
OX359190.1	125	0.823779	1.95281	0.418369	0.311153	-1.12903	-4028.27	6250000	6300000
OX359190.1	126	1.37755	2.00729	0.669218	0.497717	-0.629737	-2246.84	6300000	6350000
OX359190.1	127	0.755665	1.28428	0.576813	0.428992	-0.528616	-1886.05	6350000	6400000
OX359190.1	128	0.802936	1.20785	0.686914	0.510878	-0.404918	-1444.7	6400000	6450000
OX359190.1	129	1.52149	1.71354	0.883179	0.656845	-0.192057	-685.239	6450000	6500000
OX359190.1	130	1.33004	1.72528	0.763729	0.568007	-0.39524	-1410.18	6500000	6550000
OX359190.1	131	1.39816	1.61104	0.864746	0.643137	-0.212887	-759.559	6550000	6600000
OX359190.1	132	1.33962	1.64751	0.807059	0.600233	-0.307894	-1098.53	6600000	6650000
OX359190.1	133	1.32855	1.59983	0.832034	0.618808	-0.271273	-967.872	6650000	6700000
OX359190.1	134	1.55008	1.8331	0.845841	0.629076	-0.283019	-1009.78	6700000	6750000
OX359190.1	135	1.41232	1.78415	0.754012	0.56078	-0.371825	-1326.63	6750000	6800000
OX359190.1	136	1.65504	2.00416	0.822811	0.611948	-0.349115	-1245.61	6800000	6850000
OX359190.1	137	1.43541	1.56705	0.964844	0.717582	-0.131637	-469.669	6850000	6900000
OX359190.1	138	0.735735	1.00582	0.755587	0.561952	-0.270087	-963.642	6900000	6950000
OX359190.1	139	0.477666	0.550725	0.929865	0.691567	-0.0730592	-260.668	6950000	7000000
OX359190.1	140	0.909759	1.1129	0.857258	0.637567	-0.203139	-724.779	7000000	7050000
OX359190.1	141	1.07149	1.09125	1.02115	0.759458	-0.0197615	-70.5072	7050000	7100000
OX359190.1	142	0.738787	0.460689	2.41422	1.79552	0.278098	992.225	7100000	7150000
OX359190.1	143	0.851129	0.647828	1.44833	1.07717	0.203301	725.357	7150000	7200000
OX359190.1	144	1.23165	1.16338	1.09506	0.814426	0.0682708	243.583	7200000	7250000
OX359190.1	145	0.993998	0.902709	1.13285	0.842535	0.0912887	325.709	7250000	7300000
OX359190.1	146	1.11842	1.05965	1.06962	0.795508	0.0587684	209.68	7300000	7350000
OX359190.1	147	1.09081	1.06269	1.02518	0.762459	0.0281178	100.321	7350000	7400000
OX359190.1	148	1.06925	1.17164	0.944521	0.702468	-0.102382	-365.29	7400000	7450000
OX359190.1	149	1.19331	1.16232	1.17179	0.871493	0.0309919	110.576	7450000	7500000
OX359190.1	150	1.01675	1.06919	0.925953	0.688657	-0.0524466	-187.124	7500000	7550000
OX359190.1	151	1.04801	1.3978	0.754872	0.56142	-0.349785	-1248	7550000	7600000
OX359190.1	152	0.924885	1.11526	0.852409	0.633961	-0.190373	-679.232	7600000	7650000
OX359190.1	153	0.548368	0.826755	0.633531	0.471175	-0.278387	-993.257	7650000	7700000
OX359190.1	154	0.17949	0.393628	0.414632	0.308373	-0.214138	-764.022	7700000	7750000
OX359190.1	155	0.283059	0.495948	0.573367	0.42643	-0.212889	-759.567	7750000	7800000
OX359190.1	156	0.379888	0.536701	0.675434	0.502339	-0.156813	-559.492	7800000	7850000
OX359190.1	157	0.142543	0.284649	0.481354	0.357997	-0.142107	-507.022	7850000	7900000
OX359190.1	158	0.0673435	0.23612	0.229888	0.170974	-0.168777	-602.179	7900000	7950000
OX359190.1	159	0.524075	0.59307	0.85536	0.636156	-0.068995	-246.167	7950000	8000000
OX359190.1	160	1.20031	1.03048	1.19277	0.887096	0.169831	605.939	8000000	8050000
OX359190.1	161	0.661155	0.524389	1.39115	1.03464	0.136766	487.966	8050000	8100000
OX359190.1	162	0.687531	0.638579	1.12231	0.834694	0.0489522	174.656	8100000	8150000
OX359190.1	163	0.971199	0.73133	1.32476	0.985263	0.239868	855.825	8150000	8200000
OX359190.1	164	0.391691	0.387519	1.14502	0.851583	0.00417255	14.8872	8200000	8250000
OX359190.1	165	0.826791	0.782324	1.00996	0.751139	0.044467	158.654	8250000	8300000
OX359190.1	166	0.8653	1.29517	0.749714	0.557584	-0.429869	-1533.73	8300000	8350000
OX359190.1	167	1.08017	0.992687	1.05119	0.781797	0.087478	312.113	8350000	8400000
OX359190.1	168	1.6953	1.49613	1.12936	0.839935	0.199172	710.626	8400000	8450000
OX359190.1	169	1.19192	1.18215	1.02606	0.763109	0.00976414	34.8375	8450000	8500000
OX359190.1	170	0.984869	0.921235	1.0588	0.787459	0.0636345	227.041	8500000	8550000
OX359190.1	171	1.07823	0.955892	1.20809	0.898491	0.122339	436.492	8550000	8600000
OX359190.1	172	1.00216	0.986839	1.01129	0.752128	0.0153235	54.6728	8600000	8650000
OX359190.1	173	0.478621	0.536907	0.935425	0.695702	-0.0582861	-207.959	8650000	8700000
OX359190.1	174	1.02748	0.861837	1.37092	1.0196	0.16564	590.987	8700000	8750000
OX359190.1	175	0.567008	0.655705	0.824176	0.612963	-0.0886962	-316.459	8750000	8800000
OX359190.1	176	1.16932	0.98608	1.19948	0.892088	0.183244	653.797	8800000	8850000
OX359190.1	177	0.916009	0.6869	1.31248	0.97613	0.229109	817.438	8850000	8900000
OX359190.1	178	0.594276	0.433568	1.40116	1.04208	0.160708	573.388	8900000	8950000
OX359190.1	179	0.510942	0.462434	1.11336	0.828041	0.0485085	173.073	8950000	9000000
OX359190.1	180	0.950343	0.96958	1.06277	0.790413	-0.0192373	-68.6367	9000000	9050000
OX359190.1	181	1.06861	1.0308	1.08214	0.804819	0.0378057	134.887	9050000	9100000
OX359190.1	182	1.02594	1.11167	0.906127	0.673913	-0.0857291	-305.872	9100000	9150000
OX359190.1	183	1.20414	0.93084	1.31655	0.979154	0.273298	975.097	9150000	9200000
OX359190.1	184	1.13089	0.86839	1.455	1.08212	0.262504	936.589	9200000	9250000
OX359190.1	185	0.723442	0.447336	2.02938	1.50931	0.276107	985.12	9250000	9300000
OX359190.1	186	0.725138	0.641354	1.25611	0.934209	0.0837843	298.934	9300000	9350000
OX359190.1	187	0.574592	0.58117	0.984342	0.732084	-0.00657863	-23.4719	9350000	9400000
OX359190.1	188	0.632761	0.554462	1.58535	1.17907	0.0782993	279.364	9400000	9450000
OX359190.1	189	0.681368	0.530214	3.0236	2.24874	0.151154	539.3	9450000	9500000
OX359190.1	190	0.972733	0.862322	1.19527	0.88896	0.110411	393.934	9500000	9550000
OX359190.1	191	1.24521	1.28239	0.979375	0.728389	-0.0371728	-132.629	9550000	9600000
OX359190.1	192	0.576775	0.750705	0.757385	0.563289	-0.173929	-620.561	9600000	9650000
OX359190.1	193	0.868955	0.873605	0.993591	0.738962	-0.00465065	-16.593	9650000	9700000
OX359190.1	194	0.653859	0.43493	4.88629	3.63408	0.218929	781.117	9700000	9750000
OX359190.1	195	0.848275	0.73356	1.37769	1.02463	0.114716	409.293	9750000	9800000
OX359190.1	196	1.16001	1.10717	1.06792	0.794239	0.0528349	188.509	9800000	9850000
OX359190.1	197	0.93607	1.02089	0.885591	0.658639	-0.0848243	-302.644	9850000	9900000
OX359190.1	198	0.623739	0.629242	2.00105	1.48824	-0.0055033	-19.6352	9900000	9950000
OX359190.1	199	0.957386	0.900219	1.21312	0.902231	0.0571667	203.965	9950000	10000000
OX359190.1	200	0.549649	0.541317	1.12672	0.837974	0.00833269	29.7302	10000000	10050000
OX359190.1	201	0.980513	0.867505	1.18631	0.882296	0.113008	403.199	10050000	10100000
OX359190.1	202	1.46679	1.29253	1.14841	0.854106	0.174259	621.739	10100000	10150000
OX359190.1	203	1.80944	1.82841	1.00384	0.746587	-0.0189735	-67.6955	10150000	10200000
OX359190.1	204	1.29957	1.16202	1.5264	1.13523	0.137556	490.786	10200000	10250000
OX359190.1	205	0.749954	0.518054	1.68044	1.24979	0.2319	827.395	10250000	10285000
OX359191.1	0	1.59832	1.38128	1.13254	0.842305	0.217047	774.401	0	50000
OX359191.1	1	0.707604	0.844255	0.7931	0.589852	-0.13665	-487.554	50000	100000
OX359191.1	2	0.459313	0.637359	0.631138	0.469395	-0.178046	-635.249	100000	150000
OX359191.1	3	1.12872	1.28159	0.850539	0.632571	-0.152865	-545.408	150000	200000
OX359191.1	4	0.409588	0.534159	0.682508	0.507601	-0.12457	-444.454	200000	250000
OX359191.1	5	0.78521	1.27315	0.571647	0.425151	-0.48794	-1740.92	250000	300000
OX359191.1	6	0.751024	1.03985	0.737057	0.548171	-0.288822	-1030.49	300000	350000
OX359191.1	7	0.735045	0.722508	1.0682	0.79445	0.0125369	44.7305	350000	400000
OX359191.1	8	0.153358	0.110539	1.70301	1.26658	0.0428189	152.774	400000	450000
OX359191.1	9	0.0816336	0.0705224	1.46187	1.08723	0.0111112	39.6437	450000	500000
OX359191.1	10	0.133426	0.0879106	1.70489	1.26798	0.0455152	162.393	500000	550000
OX359191.1	11	0.667456	0.681272	1.1416	0.849043	-0.0138163	-49.2953	550000	600000
OX359191.1	12	0.510197	0.546431	0.965522	0.718087	-0.036234	-129.279	600000	650000
OX359191.1	13	0.352235	0.319068	1.13504	0.844159	0.0331667	118.335	650000	700000
OX359191.1	14	0.726234	0.698494	1.04176	0.774785	0.0277405	98.9753	700000	750000
OX359191.1	15	0.776146	0.676703	1.18417	0.880702	0.0994429	354.802	750000	800000
OX359191.1	16	0.243515	0.226145	1.13719	0.845764	0.0173703	61.9755	800000	850000
OX359191.1	17	0.60396	0.686212	0.875792	0.651351	-0.0822512	-293.464	850000	900000
OX359191.1	18	0.818935	1.03071	0.776603	0.577582	-0.211772	-755.579	900000	950000
OX359191.1	19	0.763395	0.683738	1.08855	0.809585	0.0796566	284.206	950000	1000000
OX359191.1	20	0.985628	0.911087	1.08758	0.808864	0.0745406	265.953	1000000	1050000
OX359191.1	21	0.861017	0.628055	2.19028	1.62897	0.232962	831.185	1050000	1100000
OX359191.1	22	1.43203	1.44385	1.00027	0.743933	-0.0118214	-42.1775	1100000	1150000
OX359191.1	23	1.32338	1.3757	0.96551	0.718078	-0.0523138	-186.65	1150000	1200000
OX359191.1	24	1.18891	1.23218	0.981647	0.730079	-0.0432729	-154.393	1200000	1250000
OX359191.1	25	1.27832	1.32156	0.949274	0.706002	-0.0432436	-154.289	1250000	1300000
OX359191.1	26	1.10312	0.996036	1.13295	0.842604	0.107084	382.064	1300000	1350000
OX359191.1	27	1.02081	0.972549	1.09936	0.817629	0.0482605	172.189	1350000	1400000
OX359191.1	28	0.658187	0.489862	1.40085	1.04185	0.168325	600.566	1400000	1450000
OX359191.1	29	1.46809	1.32568	1.11123	0.826457	0.14241	508.105	1450000	1500000
OX359191.1	30	0.942824	1.02287	0.936275	0.696335	-0.0800429	-285.585	1500000	1550000
OX359191.1	31	0.686191	1.1653	0.557776	0.414834	-0.479105	-1709.4	1550000	1600000
OX359191.1	32	0.471013	0.7249	0.545173	0.40546	-0.253887	-905.841	1600000	1650000
OX359191.1	33	0.831863	0.916867	1.01125	0.752092	-0.0850041	-303.286	1650000	1700000
OX359191.1	34	0.580186	0.764484	1.02276	0.760655	-0.184299	-657.558	1700000	1750000
OX359191.1	35	1.13779	0.644238	1.82994	1.36098	0.493552	1760.94	1750000	1800000
OX359191.1	36	0.786592	0.883685	0.885317	0.658435	-0.0970932	-346.419	1800000	1850000
OX359191.1	37	0.444489	0.535716	0.916394	0.681549	-0.0912269	-325.488	1850000	1900000
OX359191.1	38	0.282758	0.198608	1.34159	0.997782	0.0841508	300.241	1900000	1950000
OX359191.1	39	1.32673	1.05091	1.43375	1.06632	0.275818	984.091	1950000	2000000
OX359191.1	40	0.89195	0.920524	1.12505	0.836731	-0.0285746	-101.951	2000000	2050000
OX359191.1	41	0.981408	0.651065	1.78946	1.33087	0.330343	1178.63	2050000	2100000
OX359191.1	42	1.06847	0.923635	1.1814	0.878642	0.144835	516.756	2100000	2150000
OX359191.1	43	1.46675	1.27441	1.15332	0.857758	0.192344	686.263	2150000	2200000
OX359191.1	44	0.724012	0.912	0.786566	0.584992	-0.187988	-670.723	2200000	2250000
OX359191.1	45	0.586153	0.722919	0.807789	0.600776	-0.136767	-487.969	2250000	2300000
OX359191.1	46	0.870728	0.533363	1.81017	1.34628	0.337366	1203.69	2300000	2350000
OX359191.1	47	0.694432	0.523436	4.03541	3.00125	0.170995	610.094	2350000	2400000
OX359191.1	48	1.26143	1.27372	1.08006	0.803273	-0.0122921	-43.8571	2400000	2450000
OX359191.1	49	1.63683	1.5691	1.061	0.789095	0.0677297	241.653	2450000	2500000
OX359191.1	50	2.11577	2.28511	0.925567	0.688371	-0.169339	-604.185	2500000	2550000
OX359191.1	51	1.61808	1.68917	0.939712	0.698891	-0.071086	-253.628	2550000	2600000
OX359191.1	52	1.46291	1.56984	0.933037	0.693927	-0.10693	-381.517	2600000	2650000
OX359191.1	53	1.30198	1.30151	0.999623	0.743448	0.000474907	1.69442	2650000	2700000
OX359191.1	54	1.5938	1.62113	0.980287	0.729067	-0.0273321	-97.5181	2700000	2750000
OX359191.1	55	1.69768	1.66576	1.02041	0.758906	0.0319161	113.873	2750000	2800000
OX359191.1	56	1.56638	1.62644	0.963017	0.716224	-0.0600621	-214.295	2800000	2850000
OX359191.1	57	1.64383	1.63823	1.00203	0.745235	0.00560091	19.9835	2850000	2900000
OX359191.1	58	2.02983	2.0354	0.996541	0.741156	-0.00557077	-19.8759	2900000	2950000
OX359191.1	59	1.61978	1.72431	0.939959	0.699075	-0.104536	-372.974	2950000	3000000
OX359191.1	60	1.56507	1.67657	0.936537	0.69653	-0.111503	-397.832	3000000	3050000
OX359191.1	61	1.52786	1.57035	0.983033	0.73111	-0.0424907	-151.603	3050000	3100000
OX359191.1	62	1.82747	1.61835	1.132	0.841899	0.209124	746.134	3100000	3150000
OX359191.1	63	1.51107	1.51034	1.00078	0.744307	0.000726513	2.59212	3150000	3200000
OX359191.1	64	1.58963	1.5319	1.04308	0.775766	0.0577302	205.975	3200000	3250000
OX359191.1	65	1.59527	1.61015	0.993392	0.738814	-0.0148737	-53.0678	3250000	3300000
OX359191.1	66	1.42333	1.36371	1.04576	0.777765	0.0596211	212.722	3300000	3350000
OX359191.1	67	1.35137	1.37446	0.985702	0.733095	-0.0230835	-82.3595	3350000	3400000
OX359191.1	68	1.45412	1.48613	0.984155	0.731945	-0.0320114	-114.214	3400000	3450000
OX359191.1	69	1.34103	1.32222	1.01322	0.75356	0.0188053	67.0954	3450000	3500000
OX359191.1	70	1.62948	1.65008	0.996324	0.740995	-0.0206004	-73.5003	3500000	3550000
OX359191.1	71	1.26404	1.23864	1.01746	0.756715	0.0253975	90.6157	3550000	3600000
OX359191.1	72	1.09688	1.12195	0.958624	0.712956	-0.0250788	-89.4785	3600000	3650000
OX359191.1	73	1.35318	1.26892	1.04854	0.779827	0.0842655	300.651	3650000	3700000
OX359191.1	74	1.43634	1.25954	1.15384	0.858144	0.176797	630.792	3700000	3750000
OX359191.1	75	0.902851	0.959837	0.929037	0.690951	-0.0569863	-203.321	3750000	3800000
OX359191.1	76	1.29464	1.28781	0.994801	0.739862	0.00683297	24.3793	3800000	3850000
OX359191.1	77	1.3449	1.37722	0.983077	0.731142	-0.0323162	-115.301	3850000	3900000
OX359191.1	78	1.3511	1.34459	1.00891	0.750356	0.00651071	23.2295	3900000	3950000
OX359191.1	79	1.59508	1.58482	1.00605	0.748231	0.0102513	36.5757	3950000	4000000
OX359191.1	80	1.57613	1.55087	1.02196	0.760064	0.0252664	90.1479	4000000	4050000
OX359191.1	81	1.46956	1.45479	1.01507	0.754937	0.014777	52.723	4050000	4100000
OX359191.1	82	1.44132	1.45236	0.998845	0.74287	-0.0110424	-39.398	4100000	4150000
OX359191.1	83	1.43023	1.42269	1.00851	0.750059	0.00754278	26.9119	4150000	4200000
OX359191.1	84	1.12995	1.14679	1.14128	0.848801	-0.0168346	-60.0639	4200000	4250000
OX359191.1	85	1.56207	1.58551	0.987526	0.734451	-0.0234411	-83.6356	4250000	4300000
OX359191.1	86	1.60777	1.58357	1.00681	0.748794	0.0242075	86.3697	4300000	4350000
OX359191.1	87	1.68327	1.74906	0.961707	0.715249	-0.0657936	-234.745	4350000	4400000
OX359191.1	88	1.8308	1.74841	1.04869	0.779944	0.0823934	293.971	4400000	4450000
OX359191.1	89	2.01746	1.93095	1.04455	0.776858	0.0865069	308.648	4450000	4500000
OX359191.1	90	2.05371	2.02278	1.02171	0.759877	0.0309338	110.369	4500000	4550000
OX359191.1	91	2.00183	1.82402	1.10485	0.821712	0.17781	634.408	4550000	4600000
OX359191.1	92	1.78149	1.70024	1.04971	0.780702	0.0812545	289.908	4600000	4650000
OX359191.1	93	1.71017	1.60917	1.06547	0.792419	0.101005	360.375	4650000	4700000
OX359191.1	94	1.58924	1.28619	1.26009	0.937163	0.303052	1081.26	4700000	4750000
OX359191.1	95	2.00262	1.637	1.22366	0.910072	0.365618	1304.49	4750000	4800000
OX359191.1	96	2.24154	2.08727	1.08451	0.806581	0.154269	550.417	4800000	4850000
OX359191.1	97	1.95768	1.84623	1.05984	0.788232	0.111446	397.626	4850000	4900000
OX359191.1	98	1.99001	1.9862	1.00241	0.745523	0.00380955	13.5921	4900000	4950000
OX359191.1	99	1.99389	2.05632	0.968737	0.720477	-0.0624251	-222.726	4950000	5000000
OX359191.1	100	2.03991	2.10404	0.971444	0.722491	-0.064124	-228.788	5000000	5050000
OX359191.1	101	2.18827	2.23602	0.985241	0.732752	-0.0477484	-170.361	5050000	5100000
OX359191.1	102	1.58135	1.49807	1.0781	0.801811	0.0832812	297.139	5100000	5150000
OX359191.1	103	1.29862	1.23165	1.05267	0.782904	0.0669714	238.947	5150000	5200000
OX359191.1	104	1.42011	1.33782	1.06416	0.791449	0.0822862	293.588	5200000	5250000
OX359191.1	105	1.66279	1.51598	1.10186	0.819486	0.146812	523.811	5250000	5300000
OX359191.1	106	2.01614	1.80828	1.11194	0.82698	0.207851	741.59	5300000	5350000
OX359191.1	107	1.52756	1.36818	1.13685	0.84551	0.159382	568.659	5350000	5400000
OX359191.1	108	1.4496	1.56976	0.948255	0.705244	-0.120162	-428.725	5400000	5450000
OX359191.1	109	1.34202	1.19742	1.12714	0.838285	0.144603	515.93	5450000	5500000
OX359191.1	110	0.31938	0.291566	1.07456	0.799181	0.0278143	99.2384	5500000	5550000
OX359191.1	111	0.281822	0.146291	5.64253	4.19651	0.13553	483.558	5550000	5600000
OX359191.1	112	0.610346	0.393206	5.02945	3.74055	0.21714	774.733	5600000	5650000
OX359191.1	113	0.761498	0.619486	1.32739	0.987217	0.142012	506.683	5650000	5700000
OX359191.1	114	0.959791	0.941078	1.05034	0.781167	0.0187129	66.7658	5700000	5750000
OX359191.1	115	0.738734	0.702789	1.03227	0.767726	0.0359453	128.249	5750000	5800000
OX359191.1	116	0.460888	0.366432	1.31805	0.980271	0.0944568	337.012	5800000	5850000
OX359191.1	117	1.1381	0.978383	1.55189	1.15419	0.159713	569.841	5850000	5900000
OX359191.1	118	0.809913	0.920554	0.870999	0.647787	-0.110641	-394.755	5900000	5950000
OX359191.1	119	0.643638	0.761201	0.811641	0.60364	-0.117563	-419.452	5950000	6000000
OX359191.1	120	0.735582	0.875156	0.838263	0.62344	-0.139574	-497.984	6000000	6050000
OX359191.1	121	0.812733	0.901525	0.935959	0.6961	-0.0887921	-316.801	6050000	6100000
OX359191.1	122	1.06796	0.941339	1.16441	0.866002	0.126621	451.769	6100000	6150000
OX359191.1	123	0.547664	0.0981121	124.565	92.6425	0.449552	1603.96	6150000	6200000
OX359191.1	124	1.49801	1.17994	1.37061	1.01936	0.318071	1134.84	6200000	6250000
OX359191.1	125	0.964705	1.24101	0.744809	0.553936	-0.2763	-985.812	6250000	6300000
OX359191.1	126	0.952513	1.00574	1.06837	0.794574	-0.0532253	-189.902	6300000	6350000
OX359191.1	127	1.42697	1.29857	1.10914	0.824896	0.1284	458.118	6350000	6400000
OX359191.1	128	1.09891	1.27035	0.865722	0.643863	-0.171441	-611.683	6400000	6450000
OX359191.1	129	0.984651	0.875138	1.19011	0.885122	0.109514	390.733	6450000	6500000
OX359191.1	130	0.840728	0.918524	0.898433	0.668191	-0.0777961	-277.569	6500000	6550000
OX359191.1	131	0.540437	0.538496	1.06312	0.790671	0.00194039	6.92309	6550000	6600000
OX359191.1	132	0.578142	0.627918	0.883522	0.657101	-0.0497765	-177.597	6600000	6650000
OX359191.1	133	0.29792	0.461569	0.664492	0.494201	-0.163649	-583.882	6650000	6700000
OX359191.1	134	0.390716	0.543856	0.702111	0.52218	-0.153139	-546.386	6700000	6750000
OX359191.1	135	1.13522	1.26482	0.777022	0.577893	-0.1296	-462.4	6750000	6800000
OX359191.1	136	0.857074	0.741759	1.15308	0.857579	0.115315	411.432	6800000	6850000
OX359191.1	137	0.915456	0.723667	1.36269	1.01347	0.191789	684.284	6850000	6900000
OX359191.1	138	0.798084	0.698125	1.15552	0.859392	0.0999594	356.645	6900000	6950000
OX359191.1	139	0.265222	0.377001	0.64769	0.481706	-0.111779	-398.816	6950000	7000000
OX359191.1	140	0.263144	0.146036	6.39611	4.75697	0.117108	417.828	7000000	7050000
OX359191.1	141	0.403156	0.217685	1.99757	1.48565	0.185471	661.742	7050000	7100000
OX359191.1	142	0.472455	0.221584	1.86817	1.38941	0.250871	895.081	7100000	7150000
OX359191.1	143	0.196513	0.247571	1.04954	0.780576	-0.0510581	-182.17	7150000	7200000
OX359191.1	144	0.535913	0.471848	1.07068	0.796298	0.0640651	228.578	7200000	7250000
OX359191.1	145	1.13139	1.05858	1.10814	0.824158	0.0728097	259.777	7250000	7300000
OX359191.1	146	1.44736	1.44751	1.03137	0.767062	-0.000147456	-0.526108	7300000	7350000
OX359191.1	147	0.778271	0.785183	0.998774	0.742817	-0.00691188	-24.6609	7350000	7400000
OX359191.1	148	0.767285	0.608891	1.22649	0.912179	0.158394	565.133	7400000	7450000
OX359191.1	149	1.10208	0.98708	1.13994	0.847804	0.115002	410.316	7450000	7500000
OX359191.1	150	1.0485	0.986724	1.04523	0.777368	0.0617771	220.414	7500000	7550000
OX359191.1	151	1.19049	1.22947	0.967377	0.719466	-0.0389809	-139.08	7550000	7600000
OX359191.1	152	1.10906	0.896947	1.30822	0.972961	0.212115	756.805	7600000	7650000
OX359191.1	153	1.15739	0.949387	1.44897	1.07764	0.207999	742.119	7650000	7700000
OX359191.1	154	0.675712	0.97259	0.610451	0.45401	-0.296878	-1059.23	7700000	7750000
OX359191.1	155	0.823406	0.788511	1.20908	0.899225	0.0348955	124.503	7750000	7800000
OX359191.1	156	1.4986	1.4586	1.01797	0.75709	0.039998	142.709	7800000	7850000
OX359191.1	157	1.67575	1.55216	1.11541	0.829566	0.123594	440.969	7850000	7900000
OX359191.1	158	1.60008	1.49345	1.09006	0.810706	0.106631	380.448	7900000	7950000
OX359191.1	159	1.63303	1.64038	1.0019	0.745143	-0.00735692	-26.2487	7950000	8000000
OX359191.1	160	1.14026	1.31138	0.809121	0.601766	-0.171114	-610.516	8000000	8050000
OX359191.1	161	0.889794	1.09547	0.809151	0.601789	-0.205677	-733.835	8050000	8100000
OX359191.1	162	0.887333	1.11521	0.792672	0.589533	-0.227873	-813.028	8100000	8150000
OX359191.1	163	0.899722	1.51825	0.581962	0.432822	-0.618529	-2206.85	8150000	8200000
OX359191.1	164	0.973033	1.17067	0.816992	0.607621	-0.197638	-705.151	8200000	8250000
OX359191.1	165	1.31481	1.20345	1.14016	0.847969	0.111359	397.316	8250000	8300000
OX359191.1	166	1.28319	1.22043	1.05332	0.783382	0.0627641	223.936	8300000	8350000
OX359191.1	167	1.21315	1.35343	0.879321	0.653976	-0.140282	-500.512	8350000	8400000
OX359191.1	168	1.69029	1.7548	0.984157	0.731946	-0.0645182	-230.194	8400000	8450000
OX359191.1	169	1.07794	1.05035	1.05865	0.787345	0.0275896	98.437	8450000	8500000
OX359191.1	170	1.06516	0.968663	1.14508	0.851628	0.0964995	344.3	8500000	8550000
OX359191.1	171	0.95278	0.914841	1.14618	0.852444	0.0379387	135.361	8550000	8600000
OX359191.1	172	1.11469	1.01254	1.11661	0.830452	0.102149	364.457	8600000	8650000
OX359191.1	173	1.22987	1.17656	1.0397	0.773256	0.0533179	190.233	8650000	8700000
OX359191.1	174	1.42107	1.2663	1.10815	0.824165	0.154766	552.188	8700000	8750000
OX359191.1	175	1.61418	1.73972	0.923806	0.687061	-0.12554	-447.915	8750000	8800000
OX359191.1	176	0.832807	0.763277	1.0674	0.793857	0.0695302	248.077	8800000	8850000
OX359191.1	177	0.639877	0.604435	1.01434	0.754397	0.0354419	126.453	8850000	8900000
OX359191.1	178	1.45706	1.27507	1.18168	0.878846	0.181989	649.317	8900000	8950000
OX359191.1	179	1.49835	1.6138	0.959898	0.713904	-0.115455	-411.932	8950000	9000000
OX359191.1	180	1.48736	1.59319	0.918511	0.683123	-0.105828	-377.585	9000000	9050000
OX359191.1	181	1.144	1.10669	1.05974	0.788161	0.0373113	133.123	9050000	9100000
OX359191.1	182	1.31262	1.20372	1.13503	0.844152	0.108897	388.532	9100000	9150000
OX359191.1	183	1.49337	1.53898	0.983731	0.731629	-0.0456136	-162.745	9150000	9200000
OX359191.1	184	1.37862	1.29863	1.13267	0.842399	0.0799861	285.382	9200000	9250000
OX359191.1	185	1.5548	1.44092	1.10111	0.818924	0.113886	406.333	9250000	9300000
OX359191.1	186	1.45792	1.39376	1.01229	0.752866	0.0641654	228.936	9300000	9350000
OX359191.1	187	1.9506	1.75741	1.11969	0.832748	0.193193	689.293	9350000	9400000
OX359191.1	188	1.93152	1.8846	1.02531	0.762552	0.0469219	167.412	9400000	9415000
OX359192.1	0	1.69765	1.58483	1.12624	0.837621	0.112817	402.52	0	50000
OX359192.1	1	1.97332	1.85164	1.06331	0.790818	0.121686	434.164	50000	100000
OX359192.1	2	1.79455	1.83155	0.977637	0.727097	-0.0370008	-132.015	100000	150000
OX359192.1	3	1.4311	1.24594	1.22277	0.909411	0.185155	660.615	150000	200000
OX359192.1	4	1.44001	1.27711	1.15742	0.860807	0.162902	581.216	200000	250000
OX359192.1	5	0.559583	0.65899	0.834568	0.620692	-0.099407	-354.674	250000	300000
OX359192.1	6	0.943027	1.01386	0.911226	0.677705	-0.0708356	-252.734	300000	350000
OX359192.1	7	1.23403	1.38313	0.892685	0.663916	-0.149091	-531.941	350000	400000
OX359192.1	8	1.06616	1.31056	0.789893	0.587466	-0.244407	-872.02	400000	450000
OX359192.1	9	0.680996	0.808127	0.730613	0.543378	-0.127131	-453.589	450000	500000
OX359192.1	10	0.506994	0.826553	0.577713	0.429662	-0.319558	-1140.15	500000	550000
OX359192.1	11	1.21428	1.23531	0.944275	0.702284	-0.0210263	-75.0197	550000	600000
OX359192.1	12	1.17167	1.50689	0.778173	0.578749	-0.335218	-1196.02	600000	650000
OX359192.1	13	1.05283	1.21369	0.878541	0.653396	-0.160858	-573.925	650000	700000
OX359192.1	14	0.482633	0.806175	0.544102	0.404664	-0.323542	-1154.36	700000	750000
OX359192.1	15	1.04122	1.36802	0.753714	0.560559	-0.326805	-1166.01	750000	800000
OX359192.1	16	1.10383	1.42213	0.796624	0.592472	-0.318297	-1135.65	800000	850000
OX359192.1	17	0.630035	0.880632	0.75706	0.563047	-0.250597	-894.106	850000	900000
OX359192.1	18	1.38543	1.25646	1.14866	0.854293	0.128965	460.136	900000	950000
OX359192.1	19	1.25398	1.08477	1.17189	0.87157	0.16921	603.725	950000	1000000
OX359192.1	20	0.732527	0.554343	1.40137	1.04224	0.178183	635.74	1000000	1050000
OX359192.1	21	0.767128	0.587877	4.47241	3.32626	0.179251	639.549	1050000	1100000
OX359192.1	22	0.831523	0.795774	1.76523	1.31286	0.035749	127.549	1100000	1150000
OX359192.1	23	0.664547	0.652025	1.08108	0.804033	0.0125219	44.6767	1150000	1200000
OX359192.1	24	0.628435	0.652272	0.960551	0.714389	-0.0238368	-85.0474	1200000	1250000
OX359192.1	25	1.16368	1.00203	1.1665	0.867557	0.161645	576.732	1250000	1300000
OX359192.1	26	0.741662	0.700012	1.01452	0.75453	0.0416496	148.602	1300000	1350000
OX359192.1	27	0.654846	0.645387	1.01546	0.755229	0.00945859	33.7473	1350000	1400000
OX359192.1	28	0.606569	0.658758	0.957514	0.712131	-0.0521893	-186.206	1400000	1450000
OX359192.1	29	0.820096	1.01782	0.784307	0.583311	-0.197726	-705.467	1450000	1500000
OX359192.1	30	0.869006	0.840459	1.49069	1.10867	0.0285471	101.853	1500000	1550000
OX359192.1	31	0.578465	0.315835	1.96118	1.45859	0.26263	937.036	1550000	1600000
OX359192.1	32	0.700402	0.667406	1.05988	0.788266	0.0329958	117.726	1600000	1650000
OX359192.1	33	0.209023	0.209815	2.20676	1.64123	-0.000792337	-2.82698	1650000	1700000
OX359192.1	34	0.816687	0.717666	1.06335	0.790847	0.0990217	353.299	1700000	1750000
OX359192.1	35	0.346952	0.915459	0.364308	0.270946	-0.568507	-2028.37	1750000	1800000
OX359192.1	36	0.912327	1.304	0.676446	0.503092	-0.391674	-1397.45	1800000	1850000
OX359192.1	37	0.682177	0.936796	0.561531	0.417627	-0.254619	-908.454	1850000	1900000
OX359192.1	38	0.943337	1.09461	0.708216	0.526721	-0.151269	-539.712	1900000	1950000
OX359192.1	39	1.39138	1.45681	0.944059	0.702124	-0.0654311	-233.452	1950000	2000000
OX359192.1	40	0.996072	1.0255	0.98773	0.734603	-0.0294276	-104.995	2000000	2050000
OX359192.1	41	0.966075	0.90932	1.02928	0.765504	0.0567548	202.495	2050000	2100000
OX359192.1	42	0.23685	0.216767	1.28453	0.955342	0.0200832	71.6548	2100000	2150000
OX359192.1	43	0.522378	0.490932	1.15888	0.861895	0.031446	112.196	2150000	2200000
OX359192.1	44	0.209649	0.236199	0.972271	0.723106	-0.0265495	-94.7258	2200000	2250000
OX359192.1	45	0.416359	0.431579	1.50141	1.11664	-0.0152201	-54.3039	2250000	2300000
OX359192.1	46	0.76717	0.873568	0.890093	0.661988	-0.106398	-379.617	2300000	2350000
OX359192.1	47	0.717041	0.802365	0.763931	0.568157	-0.0853234	-304.425	2350000	2400000
OX359192.1	48	1.07709	1.16453	0.917286	0.682212	-0.0874342	-311.956	2400000	2450000
OX359192.1	49	0.964744	1.01657	0.935234	0.695561	-0.0518245	-184.905	2450000	2500000
OX359192.1	50	0.289207	0.426497	0.596733	0.443808	-0.137289	-489.834	2500000	2550000
OX359192.1	51	0.0863885	0.161412	0.708395	0.526854	-0.0750235	-267.676	2550000	2600000
OX359192.1	52	0.151968	0.115146	1.31899	0.980972	0.0368227	131.38	2600000	2650000
OX359192.1	53	0.126157	0.0938364	2.52114	1.87505	0.0323206	115.316	2650000	2700000
OX359192.1	54	1.04048	0.914767	0.983806	0.731685	0.125714	448.535	2700000	2750000
OX359192.1	55	1.68968	2.03191	0.843541	0.627365	-0.34223	-1221.04	2750000	2800000
OX359192.1	56	1.15543	1.24467	0.961919	0.715407	-0.0892435	-318.412	2800000	2850000
OX359192.1	57	0.989945	1.42065	0.69139	0.514207	-0.430709	-1536.72	2850000	2900000
OX359192.1	58	0.714743	0.824215	0.91945	0.683821	-0.109472	-390.586	2900000	2950000
OX359192.1	59	1.355	1.20184	1.16318	0.86509	0.153152	546.429	2950000	3000000
OX359192.1	60	1.50223	1.44999	1.04832	0.779667	0.0522413	186.391	3000000	3050000
OX359192.1	61	0.995049	1.0337	0.974663	0.724885	-0.0386506	-137.901	3050000	3100000
OX359192.1	62	0.329898	0.361002	0.916771	0.681829	-0.0311043	-110.977	3100000	3150000
OX359192.1	63	0.364151	0.364745	1.0127	0.753171	-0.000594081	-2.11962	3150000	3200000
OX359192.1	64	0.269497	0.315733	0.854886	0.635803	-0.0462358	-164.965	3200000	3250000
OX359192.1	65	0.183337	0.205447	1.07977	0.803053	-0.0221099	-78.8857	3250000	3300000
OX359192.1	66	0.404353	0.393323	1.02542	0.762631	0.01103	39.3539	3300000	3350000
OX359192.1	67	0.305327	0.301671	1.02667	0.763567	0.00365615	13.0448	3350000	3400000
OX359192.1	68	0.287655	0.31953	0.90331	0.671818	-0.0318752	-113.727	3400000	3450000
OX359192.1	69	0.103586	0.102823	0.407961	0.303412	0.000762978	2.72223	3450000	3500000
OX359192.1	70	0.275058	0.311245	0.871625	0.648253	-0.0361868	-129.111	3500000	3550000
OX359192.1	71	0.278854	0.379921	0.74007	0.550411	-0.101067	-360.597	3550000	3600000
OX359192.1	72	0.182844	0.261894	0.69427	0.516349	-0.07905	-282.042	3600000	3650000
OX359192.1	73	0.189173	0.23134	0.653954	0.486364	-0.0421667	-150.447	3650000	3700000
OX359192.1	74	0.249663	0.266236	0.933402	0.694197	-0.0165733	-59.1319	3700000	3750000
OX359192.1	75	0.218747	0.226158	0.920208	0.684385	-0.00741153	-26.4436	3750000	3800000
OX359192.1	76	0.1437	0.163469	0.887196	0.659833	-0.0197687	-70.5327	3800000	3850000
OX359192.1	77	0.227669	0.256994	0.88585	0.658832	-0.0293246	-104.627	3850000	3900000
OX359192.1	78	0.210593	0.23529	0.933608	0.694351	-0.0246974	-88.1177	3900000	3950000
OX359192.1	79	0.146577	0.148346	0.809769	0.602249	-0.00176865	-6.31037	3950000	4000000
OX359192.1	80	0.18483	0.205781	0.883309	0.656942	-0.0209509	-74.7505	4000000	4050000
OX359192.1	81	0.0992169	0.131605	0.6841	0.508785	-0.0323883	-115.558	4050000	4100000
OX359192.1	82	0.154094	0.202462	0.706498	0.525443	-0.0483682	-172.573	4100000	4150000
OX359192.1	83	0.0307331	0.0999543	0.303652	0.225835	-0.0692211	-246.974	4150000	4200000
OX359192.1	84	0.0735158	0.110442	0.511142	0.380151	-0.036926	-131.748	4200000	4250000
OX359192.1	85	0.0907098	0.191086	0.592139	0.440391	-0.100376	-358.133	4250000	4300000
OX359192.1	86	0.119412	0.149021	0.721064	0.536276	-0.0296086	-105.641	4300000	4350000
OX359192.1	87	0.140347	0.173175	0.803724	0.597752	-0.0328284	-117.128	4350000	4400000
OX359192.1	88	0.137958	0.177051	0.781952	0.58156	-0.0390925	-139.478	4400000	4450000
OX359192.1	89	0.141373	0.174891	0.806484	0.599805	-0.0335181	-119.589	4450000	4500000
OX359192.1	90	0.278406	0.304856	0.901707	0.670625	-0.0264494	-94.3689	4500000	4550000
OX359192.1	91	0.242881	0.314464	0.776904	0.577805	-0.0715833	-255.402	4550000	4600000
OX359192.1	92	0.354235	0.36882	0.96729	0.719401	-0.0145853	-52.0387	4600000	4650000
OX359192.1	93	0.288105	0.332226	0.864078	0.64264	-0.0441207	-157.418	4650000	4700000
OX359192.1	94	0.303103	0.362435	0.839032	0.624012	-0.0593319	-211.69	4700000	4750000
OX359192.1	95	0.813296	0.818537	1.01027	0.751365	-0.0052409	-18.699	4750000	4800000
OX359192.1	96	1.45884	1.50492	0.980197	0.729001	-0.0460732	-164.384	4800000	4850000
OX359192.1	97	1.60753	1.34052	1.43603	1.06802	0.267007	952.654	4850000	4900000
OX359192.1	98	0.431017	0.270425	1.60833	1.19616	0.160592	572.975	4900000	4950000
OX359192.1	99	0.517398	0.333065	1.67064	1.2425	0.184333	657.68	4950000	5000000
OX359192.1	100	1.34679	1.08141	1.26495	0.940779	0.265382	946.855	5000000	5050000
OX359192.1	101	1.44211	1.24771	1.17335	0.872655	0.194394	693.576	5050000	5100000
OX359192.1	102	1.43509	1.36288	1.07563	0.79998	0.072207	257.627	5100000	5150000
OX359192.1	103	1.44654	1.23131	1.22751	0.912931	0.215224	767.899	5150000	5200000
OX359192.1	104	1.39995	0.951107	1.87918	1.3976	0.448845	1601.43	5200000	5250000
OX359192.1	105	1.34222	0.899207	1.70561	1.26851	0.443015	1580.63	5250000	5300000
OX359192.1	106	1.45504	1.50418	1.00911	0.750505	-0.0491377	-175.318	5300000	5350000
OX359192.1	107	1.03958	1.55887	0.675385	0.502303	-0.519286	-1852.76	5350000	5400000
OX359192.1	108	1.50074	1.66443	0.899765	0.669181	-0.163689	-584.027	5400000	5450000
OX359192.1	109	1.50681	1.5462	0.976463	0.726224	-0.0393919	-140.546	5450000	5500000
OX359192.1	110	1.412	1.6231	0.86687	0.644716	-0.211102	-753.192	5500000	5550000
OX359192.1	111	1.23671	1.24917	1.05893	0.787555	-0.0124624	-44.4646	5550000	5600000
OX359192.1	112	1.26395	1.07405	1.22054	0.907752	0.189895	677.525	5600000	5650000
OX359192.1	113	1.53931	1.25253	1.2658	0.941411	0.286788	1023.23	5650000	5700000
OX359192.1	114	1.6325	1.44734	1.16683	0.867805	0.185165	660.651	5700000	5750000
OX359192.1	115	1.29324	1.24447	1.05096	0.781627	0.048769	174.003	5750000	5800000
OX359192.1	116	1.15585	1.29453	0.892589	0.663844	-0.138682	-494.804	5800000	5850000
OX359192.1	117	1.46934	1.46916	1.04384	0.776334	0.000176092	0.628277	5850000	5900000
OX359192.1	118	1.53588	1.56326	1.00161	0.744928	-0.0273806	-97.6912	5900000	5950000
OX359192.1	119	1.45833	1.4378	1.02604	0.763092	0.0205302	73.2495	5950000	6000000
OX359192.1	120	1.31627	1.35991	0.987109	0.734141	-0.0436416	-155.709	6000000	6050000
OX359192.1	121	1.40132	1.14412	1.25749	0.93523	0.257195	917.646	6050000	6100000
OX359192.1	122	1.31575	0.949505	3.25858	2.4235	0.366242	1306.72	6100000	6150000
OX359192.1	123	0.81982	0.440288	2.32377	1.72825	0.379532	1354.13	6150000	6200000
OX359192.1	124	1.45208	1.47478	0.990964	0.737008	-0.0226926	-80.9647	6200000	6250000
OX359192.1	125	0.301094	0.247708	1.16221	0.864372	0.0533857	190.475	6250000	6300000
OX359192.1	126	1.47249	1.45702	1.02967	0.765796	0.0154734	55.2075	6300000	6350000
OX359192.1	127	1.08133	1.07401	1.07226	0.797467	0.00732115	26.1211	6350000	6400000
OX359192.1	128	1.50302	1.52499	0.993103	0.738599	-0.021975	-78.4045	6400000	6450000
OX359192.1	129	1.04495	0.936638	1.2252	0.911215	0.108309	386.434	6450000	6500000
OX359192.1	130	0.482359	0.0660713	15.1616	11.2761	0.416288	1485.27	6500000	6550000
OX359192.1	131	1.32449	1.27188	1.14015	0.847963	0.0526105	187.709	6550000	6600000
OX359192.1	132	1.36105	1.42754	0.954019	0.709531	-0.0664957	-237.25	6600000	6650000
OX359192.1	133	1.40916	1.30152	1.14556	0.851989	0.107646	384.07	6650000	6700000
OX359192.1	134	1.34456	1.50834	0.883574	0.657139	-0.16378	-584.352	6700000	6750000
OX359192.1	135	1.73033	1.74741	0.995398	0.740306	-0.0170811	-60.9436	6750000	6800000
OX359192.1	136	1.73999	1.78919	0.977602	0.727071	-0.0491928	-175.515	6800000	6850000
OX359192.1	137	1.16387	1.03085	1.50356	1.11824	0.133019	474.598	6850000	6900000
OX359192.1	138	1.20376	1.13457	1.41919	1.0555	0.0691924	246.871	6900000	6950000
OX359192.1	139	1.69195	1.4834	1.17142	0.871222	0.208558	744.112	6950000	7000000
OX359192.1	140	1.28866	1.14738	1.20662	0.897399	0.141276	504.059	7000000	7050000
OX359192.1	141	1.6708	1.61475	1.04978	0.780753	0.0560552	199.999	7050000	7100000
OX359192.1	142	1.63282	1.80264	0.889295	0.661394	-0.169817	-605.891	7100000	7150000
OX359192.1	143	0.850559	0.796151	1.21929	0.906825	0.0544074	194.12	7150000	7200000
OX359192.1	144	1.43052	1.64019	0.865923	0.644012	-0.209664	-748.06	7200000	7250000
OX359192.1	145	1.29289	1.17259	1.18348	0.880185	0.1203	429.218	7250000	7300000
OX359192.1	146	1.03386	0.790508	1.66137	1.23561	0.243356	868.27	7300000	7350000
OX359192.1	147	0.920213	0.570643	1.57639	1.17241	0.34957	1247.23	7350000	7400000
OX359192.1	148	1.30456	1.29804	1.05207	0.782455	0.00651579	23.2477	7400000	7450000
OX359192.1	149	0.617248	0.547161	1.1109	0.826208	0.0700869	250.063	7450000	7500000
OX359192.1	150	1.77992	1.66895	1.08004	0.803253	0.110972	395.936	7500000	7550000
OX359192.1	151	0.941428	0.912018	1.04182	0.774831	0.0294107	104.934	7550000	7600000
OX359192.1	152	1.66321	1.80802	0.922585	0.686153	-0.144811	-516.67	7600000	7650000
OX359192.1	153	1.60776	1.73329	0.922478	0.686073	-0.125537	-447.904	7650000	7700000
OX359192.1	154	1.70949	1.80272	0.961291	0.71494	-0.0932269	-332.624	7700000	7750000
OX359192.1	155	1.2138	1.18964	1.00794	0.749635	0.0241601	86.2006	7750000	7800000
OX359192.1	156	1.12416	1.31975	0.841596	0.625919	-0.195584	-697.823	7800000	7850000
OX359192.1	157	1.31015	1.4306	0.932372	0.693432	-0.120455	-429.77	7850000	7900000
OX359192.1	158	1.41943	1.48536	0.956261	0.711199	-0.0659321	-235.239	7900000	7950000
OX359192.1	159	1.60565	1.41082	1.15173	0.856578	0.194829	695.129	7950000	8000000
OX359192.1	160	0.88544	0.652568	4.18386	3.11166	0.232872	830.864	8000000	8050000
OX359192.1	161	1.7809	1.78138	1.00558	0.74788	-0.000480457	-1.71422	8050000	8100000
OX359192.1	162	0.566979	0.569061	0.981871	0.730245	-0.00208148	-7.4265	8100000	8150000
OX359192.1	163	1.1325	1.31948	0.789285	0.587014	-0.186981	-667.129	8150000	8200000
OX359192.1	164	1.43949	1.63167	0.888922	0.661117	-0.192182	-685.686	8200000	8250000
OX359192.1	165	1.02757	1.17663	0.912724	0.678819	-0.149053	-531.805	8250000	8300000
OX359192.1	166	1.51838	1.44939	1.06472	0.791865	0.0689969	246.174	8300000	8350000
OX359192.1	167	1.25535	1.41413	0.913044	0.679057	-0.158783	-566.523	8350000	8400000
OX359192.1	168	1.20746	1.07326	1.18624	0.882244	0.134198	478.806	8400000	8450000
OX359192.1	169	1.03737	0.906295	1.23731	0.920222	0.131079	467.677	8450000	8500000
OX359192.1	170	1.36819	1.36568	1.02892	0.765239	0.00251122	8.95979	8500000	8550000
OX359192.1	171	1.13164	0.949667	1.22339	0.909874	0.181973	649.26	8550000	8600000
OX359192.1	172	1.22247	1.19386	1.03149	0.767147	0.0286135	102.09	8600000	8650000
OX359192.1	173	1.57463	1.15521	1.67836	1.24825	0.419421	1496.45	8650000	8700000
OX359192.1	174	1.70255	1.72497	0.980166	0.728978	-0.0224243	-80.0076	8700000	8750000
OX359192.1	175	1.23263	1.42921	0.847896	0.630605	-0.196578	-701.37	8750000	8800000
OX359192.1	176	1.54849	1.54769	0.992845	0.738408	0.000801331	2.85907	8800000	8850000
OX359192.1	177	1.60326	1.8814	0.860893	0.640271	-0.27814	-992.376	8850000	8900000
OX359192.1	178	1.7865	1.71375	1.04346	0.776049	0.0727505	259.566	8900000	8950000
OX359192.1	179	0.899133	1.11802	0.804218	0.59812	-0.218889	-780.973	8950000	8955000
OX359193.1	0	1.53153	1.45783	1.25389	0.932551	0.0737006	262.956	0	50000
OX359193.1	1	1.92234	1.56032	1.28335	0.954464	0.362019	1291.65	50000	100000
OX359193.1	2	1.62527	1.37834	1.26599	0.941554	0.24693	881.021	100000	150000
OX359193.1	3	1.59398	1.36874	1.16855	0.869083	0.225236	803.619	150000	200000
OX359193.1	4	1.26585	1.28866	0.972876	0.723555	-0.0228069	-81.3726	200000	250000
OX359193.1	5	1.33784	1.28539	1.04411	0.776533	0.0524427	187.11	250000	300000
OX359193.1	6	1.0376	0.909592	1.09934	0.817611	0.128004	456.704	300000	350000
OX359193.1	7	1.42567	1.35355	1.07179	0.797121	0.0721183	257.311	350000	400000
OX359193.1	8	1.42994	1.22311	1.2302	0.914934	0.206825	737.93	400000	450000
OX359193.1	9	1.54912	1.22845	1.28064	0.952452	0.320669	1144.11	450000	500000
OX359193.1	10	1.34128	1.272	1.07244	0.797607	0.069274	247.162	500000	550000
OX359193.1	11	1.41891	0.946392	1.54886	1.15193	0.472519	1685.9	550000	600000
OX359193.1	12	1.33659	1.01359	1.4608	1.08644	0.322999	1152.43	600000	650000
OX359193.1	13	0.80578	1.1593	0.6202	0.46126	-0.353521	-1261.33	650000	700000
OX359193.1	14	0.431323	0.928629	0.441268	0.328184	-0.497306	-1774.34	700000	750000
OX359193.1	15	1.01276	1.28526	0.777521	0.578264	-0.272501	-972.256	750000	800000
OX359193.1	16	1.54868	1.35315	1.16125	0.863656	0.195525	697.612	800000	850000
OX359193.1	17	1.46224	1.25265	1.17655	0.875032	0.209584	747.774	850000	900000
OX359193.1	18	1.20609	1.07038	1.12312	0.835295	0.135707	484.19	900000	950000
OX359193.1	19	1.11953	0.977301	1.16647	0.867537	0.142231	507.464	950000	1000000
OX359193.1	20	0.88828	0.726403	1.29524	0.963306	0.161878	577.562	1000000	1050000
OX359193.1	21	1.00041	0.810637	1.28835	0.95818	0.18977	677.08	1050000	1100000
OX359193.1	22	1.08574	1.09378	1.0262	0.763217	-0.00804031	-28.687	1100000	1150000
OX359193.1	23	0.65121	0.568797	1.18604	0.882094	0.0824133	294.042	1150000	1200000
OX359193.1	24	0.751784	0.851158	0.904941	0.67303	-0.0993735	-354.554	1200000	1250000
OX359193.1	25	0.910401	1.0634	0.803496	0.597583	-0.152999	-545.886	1250000	1300000
OX359193.1	26	1.39733	1.09763	1.28332	0.954441	0.299706	1069.32	1300000	1350000
OX359193.1	27	0.57962	1.03938	0.54814	0.407667	-0.459759	-1640.37	1350000	1400000
OX359193.1	28	0.634611	0.73125	0.800944	0.595685	-0.0966384	-344.796	1400000	1450000
OX359193.1	29	1.27695	1.13542	1.17773	0.875914	0.141534	504.98	1450000	1500000
OX359193.1	30	1.36091	1.50296	0.857423	0.63769	-0.142048	-506.813	1500000	1550000
OX359193.1	31	1.27877	1.33402	0.920437	0.684555	-0.0552482	-197.12	1550000	1600000
OX359193.1	32	1.39049	1.31048	1.07084	0.796416	0.080011	285.471	1600000	1650000
OX359193.1	33	1.41107	1.14062	1.26174	0.938392	0.27045	964.938	1650000	1700000
OX359193.1	34	1.44159	1.1504	1.29163	0.960623	0.291189	1038.93	1700000	1750000
OX359193.1	35	1.62402	1.38853	1.18713	0.882904	0.235498	840.234	1750000	1800000
OX359193.1	36	0.765039	0.773124	0.89509	0.665704	-0.00808538	-28.8478	1800000	1850000
OX359193.1	37	1.29272	1.24358	1.09497	0.814359	0.0491364	175.314	1850000	1900000
OX359193.1	38	0.715589	0.455704	1.99255	1.48192	0.259885	927.243	1900000	1950000
OX359193.1	39	1.14631	1.20399	0.946692	0.704082	-0.057684	-205.811	1950000	2000000
OX359193.1	40	0.926399	0.953423	0.982872	0.73099	-0.0270248	-96.4217	2000000	2050000
OX359193.1	41	1.21502	0.948955	1.63499	1.21599	0.26607	949.309	2050000	2100000
OX359193.1	42	1.37514	1.18477	1.21628	0.904582	0.190365	679.201	2100000	2150000
OX359193.1	43	0.820542	0.857572	0.953737	0.709321	-0.03703	-132.119	2150000	2200000
OX359193.1	44	0.782144	0.634254	1.55069	1.15329	0.147889	527.653	2200000	2250000
OX359193.1	45	1.96008	1.4929	1.3369	0.994289	0.467179	1666.85	2250000	2300000
OX359193.1	46	1.79097	1.56421	1.16149	0.863836	0.226765	809.074	2300000	2350000
OX359193.1	47	2.01889	1.70813	1.18147	0.878691	0.310758	1108.75	2350000	2400000
OX359193.1	48	1.00897	0.859755	0.820274	0.610061	0.149215	532.383	2400000	2450000
OX359193.1	49	1.80813	1.57473	1.15152	0.85642	0.233398	832.739	2450000	2500000
OX359193.1	50	1.88638	1.79338	1.08113	0.804065	0.0929963	331.801	2500000	2550000
OX359193.1	51	2.03662	1.96062	1.04027	0.773677	0.0760055	271.18	2550000	2600000
OX359193.1	52	2.00505	2.02309	0.995034	0.740035	-0.018046	-64.3861	2600000	2650000
OX359193.1	53	2.13792	2.11259	1.01563	0.755352	0.0253367	90.3988	2650000	2700000
OX359193.1	54	2.08854	2.06307	1.0147	0.754658	0.0254724	90.8828	2700000	2750000
OX359193.1	55	2.0737	2.00119	1.03765	0.771733	0.0725111	258.712	2750000	2800000
OX359193.1	56	2.06407	1.98491	1.04236	0.775235	0.0791652	282.453	2800000	2850000
OX359193.1	57	2.19242	2.08929	1.0532	0.783295	0.103139	367.99	2850000	2900000
OX359193.1	58	2.10022	1.91588	1.0996	0.817804	0.184345	657.722	2900000	2950000
OX359193.1	59	1.46415	1.31967	1.10031	0.818329	0.14448	515.489	2950000	3000000
OX359193.1	60	1.04488	0.993379	1.04741	0.778993	0.0515012	183.751	3000000	3050000
OX359193.1	61	1.06288	0.970861	1.09609	0.815195	0.0920157	328.303	3050000	3100000
OX359193.1	62	1.31006	1.16667	1.14734	0.853307	0.143392	511.609	3100000	3150000
OX359193.1	63	1.079	0.906312	1.17353	0.872792	0.172688	616.131	3150000	3200000
OX359193.1	64	1.2622	1.05618	1.22122	0.908255	0.206021	735.063	3200000	3250000
OX359193.1	65	1.25096	0.92297	1.3751	1.0227	0.327994	1170.25	3250000	3300000
OX359193.1	66	0.970091	0.67012	1.53266	1.13988	0.299971	1070.27	3300000	3350000
OX359193.1	67	1.12644	0.880301	1.4467	1.07595	0.246141	878.206	3350000	3400000
OX359193.1	68	1.48668	1.27534	1.16991	0.870097	0.211338	754.033	3400000	3450000
OX359193.1	69	1.43004	1.14733	1.2554	0.933675	0.282717	1008.7	3450000	3500000
OX359193.1	70	1.47521	1.22236	1.20829	0.898643	0.252844	902.121	3500000	3550000
OX359193.1	71	1.54927	1.34378	1.15337	0.857797	0.205489	733.163	3550000	3600000
OX359193.1	72	1.79687	1.52743	1.17504	0.873912	0.269439	961.329	3600000	3650000
OX359193.1	73	1.86703	1.6864	1.11132	0.826522	0.180623	644.443	3650000	3700000
OX359193.1	74	2.04186	1.91408	1.08139	0.804264	0.127778	455.9	3700000	3750000
OX359193.1	75	1.91941	1.62354	1.19345	0.887607	0.295869	1055.63	3750000	3800000
OX359193.1	76	1.67392	1.47277	1.14091	0.84853	0.201153	717.694	3800000	3850000
OX359193.1	77	2.06148	1.97519	1.04915	0.780283	0.0862893	307.871	3850000	3900000
OX359193.1	78	1.92885	1.8643	1.03505	0.769798	0.0645465	230.295	3900000	3950000
OX359193.1	79	1.79962	1.57731	1.14867	0.854295	0.222303	793.154	3950000	4000000
OX359193.1	80	1.92706	2.0608	0.935297	0.695607	-0.13374	-477.169	4000000	4050000
OX359193.1	81	1.91429	2.01508	0.951549	0.707694	-0.100792	-359.614	4050000	4100000
OX359193.1	82	1.68008	1.79128	0.942265	0.700789	-0.111202	-396.757	4100000	4150000
OX359193.1	83	1.92526	2.05297	0.936094	0.6962	-0.12771	-455.656	4150000	4200000
OX359193.1	84	1.32671	1.37163	0.980801	0.72945	-0.0449223	-160.278	4200000	4250000
OX359193.1	85	1.30676	1.41873	0.95744	0.712076	-0.111966	-399.483	4250000	4300000
OX359193.1	86	1.39147	1.28646	1.12443	0.836269	0.10501	374.664	4300000	4350000
OX359193.1	87	1.84087	1.67639	1.10221	0.819745	0.164487	586.873	4350000	4400000
OX359193.1	88	1.66819	1.69041	0.988232	0.734977	-0.0222176	-79.2701	4400000	4450000
OX359193.1	89	1.87917	1.83695	1.02702	0.763825	0.0422126	150.61	4450000	4500000
OX359193.1	90	1.41333	1.3678	0.9299	0.691593	0.0455282	162.44	4500000	4550000
OX359193.1	91	1.20126	1.04607	0.913066	0.679073	0.155187	553.691	4550000	4600000
OX359193.1	92	1.11283	0.986963	0.902607	0.671295	0.125864	449.068	4600000	4650000
OX359193.1	93	1.71963	1.46414	1.17226	0.871842	0.255495	911.579	4650000	4700000
OX359193.1	94	1.53068	1.56861	0.992531	0.738174	-0.0379267	-135.319	4700000	4750000
OX359193.1	95	1.20613	1.34428	0.886973	0.659667	-0.138151	-492.909	4750000	4800000
OX359193.1	96	1.22123	1.19701	1.00198	0.745201	0.0242168	86.4032	4800000	4850000
OX359193.1	97	1.4509	1.38209	1.08822	0.809337	0.0688077	245.499	4850000	4900000
OX359193.1	98	0.836059	0.841217	1.01606	0.755675	-0.0051582	-18.4039	4900000	4950000
OX359193.1	99	0.979075	1.01117	1.01664	0.756101	-0.0320997	-114.528	4950000	5000000
OX359193.1	100	1.50886	1.1553	1.32042	0.982031	0.35357	1261.5	5000000	5050000
OX359193.1	101	1.73044	1.54993	1.14704	0.853087	0.180512	644.047	5050000	5100000
OX359193.1	102	1.22012	1.03125	1.2283	0.913524	0.18887	673.868	5100000	5150000
OX359193.1	103	1.00291	1.07415	0.981764	0.730166	-0.0712343	-254.157	5150000	5200000
OX359193.1	104	1.45806	1.43565	1.03079	0.766631	0.0224111	79.9604	5200000	5250000
OX359193.1	105	1.19689	1.17477	1.00717	0.749062	0.0221149	78.9036	5250000	5300000
OX359193.1	106	0.789129	0.894578	0.900732	0.6699	-0.105449	-376.229	5300000	5350000
OX359193.1	107	0.678038	0.926021	0.765866	0.569596	-0.247983	-884.777	5350000	5400000
OX359193.1	108	1.34991	0.969367	1.70849	1.27065	0.380543	1357.74	5400000	5450000
OX359193.1	109	1.57688	1.02028	1.60624	1.19461	0.55659	1985.86	5450000	5500000
OX359193.1	110	1.7386	0.998911	1.83787	1.36688	0.739692	2639.15	5500000	5550000
OX359193.1	111	1.47176	1.2208	1.28341	0.95451	0.250963	895.41	5550000	5600000
OX359193.1	112	0.865347	1.1994	0.709844	0.527931	-0.334056	-1191.88	5600000	5650000
OX359193.1	113	0.603896	0.809024	0.754531	0.561167	-0.205129	-731.877	5650000	5700000
OX359193.1	114	0.502631	0.761812	0.61597	0.458114	-0.259181	-924.732	5700000	5750000
OX359193.1	115	1.38386	1.42895	0.957382	0.712033	-0.0450872	-160.866	5750000	5800000
OX359193.1	116	1.52213	1.69972	0.923716	0.686994	-0.177591	-633.627	5800000	5850000
OX359193.1	117	0.904619	1.10221	0.888953	0.661139	-0.197592	-704.989	5850000	5900000
OX359193.1	118	1.17739	1.48624	0.797038	0.59278	-0.30885	-1101.95	5900000	5950000
OX359193.1	119	1.20748	1.44898	0.831668	0.618535	-0.241503	-861.658	5950000	6000000
OX359193.1	120	0.673614	0.809582	0.617982	0.459611	-0.135968	-485.12	6000000	6050000
OX359193.1	121	1.03034	1.04289	1.00641	0.748497	-0.0125491	-44.7738	6050000	6100000
OX359193.1	122	0.512738	0.472775	1.54122	1.14625	0.0399632	142.584	6100000	6150000
OX359193.1	123	1.06551	1.23259	0.864868	0.643227	-0.167073	-596.098	6150000	6200000
OX359193.1	124	1.04534	0.971776	1.17019	0.870304	0.0735599	262.454	6200000	6250000
OX359193.1	125	1.27608	0.975901	1.28789	0.957843	0.30018	1071.01	6250000	6300000
OX359193.1	126	1.40554	1.41854	1.06966	0.795535	-0.0129918	-46.3534	6300000	6350000
OX359193.1	127	1.29858	1.40568	0.929172	0.691052	-0.107092	-382.093	6350000	6400000
OX359193.1	128	0.996911	1.16597	0.859218	0.639025	-0.169063	-603.2	6400000	6450000
OX359193.1	129	1.03693	1.60299	0.63843	0.474818	-0.566061	-2019.65	6450000	6500000
OX359193.1	130	1.09001	1.39671	0.832129	0.618878	-0.306694	-1094.25	6500000	6550000
OX359193.1	131	1.22878	1.3676	0.923764	0.68703	-0.138825	-495.314	6550000	6600000
OX359193.1	132	1.00138	1.24005	0.813799	0.605246	-0.238676	-851.571	6600000	6650000
OX359193.1	133	0.62171	0.691978	0.907905	0.675235	-0.0702677	-250.708	6650000	6700000
OX359193.1	134	0.814328	0.808617	0.936341	0.696384	0.00571085	20.3757	6700000	6750000
OX359193.1	135	2.07316	1.77438	1.17827	0.876311	0.298777	1066.01	6750000	6800000
OX359193.1	136	1.63881	1.64005	1.00594	0.748147	-0.00123263	-4.3979	6800000	6850000
OX359193.1	137	1.68505	1.87125	0.899725	0.669151	-0.186198	-664.336	6850000	6900000
OX359193.1	138	1.64957	1.65439	1.01034	0.751418	-0.00482159	-17.2029	6900000	6950000
OX359193.1	139	1.69251	1.65446	1.03067	0.766537	0.0380468	135.747	6950000	7000000
OX359193.1	140	1.57834	1.42708	1.31229	0.975987	0.151261	539.684	7000000	7050000
OX359193.1	141	1.3976	1.35741	1.05659	0.785816	0.0401962	143.416	7050000	7100000
OX359193.1	142	1.08487	0.570299	5.16813	3.84369	0.514574	1835.95	7100000	7150000
OX359193.1	143	1.79944	1.66439	1.10299	0.820324	0.135048	481.837	7150000	7200000
OX359193.1	144	1.39683	1.23203	1.15749	0.86086	0.164802	587.996	7200000	7250000
OX359193.1	145	1.0732	1.12145	1.02654	0.763468	-0.0482576	-172.178	7250000	7300000
OX359193.1	146	1.47435	1.65192	0.888817	0.661039	-0.177566	-633.535	7300000	7350000
OX359193.1	147	1.70049	1.78819	0.968046	0.719964	-0.0876977	-312.896	7350000	7400000
OX359193.1	148	1.5155	1.38275	1.14466	0.851315	0.132749	473.635	7400000	7450000
OX359193.1	149	1.82721	1.78555	1.03093	0.76673	0.0416634	148.651	7450000	7500000
OX359193.1	150	1.75161	1.58589	1.12888	0.839577	0.165724	591.287	7500000	7550000
OX359193.1	151	1.50366	1.50757	1.02855	0.76496	-0.00390158	-13.9204	7550000	7600000
OX359193.1	152	1.78943	1.63025	1.13109	0.841227	0.15918	567.938	7600000	7650000
OX359193.1	153	1.66806	1.46129	1.15054	0.855687	0.206769	737.73	7650000	7700000
OX359193.1	154	1.40855	1.34128	1.03901	0.772745	0.0672616	239.983	7700000	7750000
OX359193.1	155	1.15788	1.09169	1.0915	0.811778	0.0661851	236.142	7750000	7800000
OX359193.1	156	0.909607	0.928902	0.945634	0.703295	-0.019295	-68.8426	7800000	7850000
OX359193.1	157	1.24315	1.33549	0.92965	0.691408	-0.092348	-329.488	7850000	7900000
OX359193.1	158	1.04128	1.19272	0.873648	0.649757	-0.151444	-540.337	7900000	7950000
OX359193.1	159	0.481655	0.590251	0.82542	0.613888	-0.108596	-387.459	7950000	8000000
OX359193.1	160	0.451911	0.505287	1.01442	0.754456	-0.0533755	-190.438	8000000	8050000
OX359193.1	161	0.742047	0.860934	0.8452	0.6286	-0.118887	-424.175	8050000	8100000
OX359193.1	162	1.63868	1.35901	1.25704	0.934896	0.279675	997.851	8100000	8150000
OX359193.1	163	1.19673	1.11841	1.101	0.818842	0.0783204	279.439	8150000	8200000
OX359193.1	164	1.10984	0.935238	1.19579	0.889346	0.174606	622.977	8200000	8250000
OX359193.1	165	0.498204	0.473748	1.25407	0.932686	0.0244559	87.2561	8250000	8300000
OX359193.1	166	1.35467	1.46052	1.00007	0.74378	-0.105842	-377.633	8300000	8350000
OX359193.1	167	1.27218	1.4011	0.904707	0.672856	-0.128914	-459.952	8350000	8400000
OX359193.1	168	1.15826	1.08111	1.10567	0.822315	0.0771543	275.278	8400000	8450000
OX359193.1	169	1.03527	1.02723	1.00019	0.743869	0.00803735	28.6764	8450000	8500000
OX359193.1	170	0.813762	0.889387	1.01248	0.753013	-0.0756243	-269.82	8500000	8550000
OX359193.1	171	1.14097	1.13162	1.07842	0.802055	0.00935511	33.3781	8550000	8600000
OX359193.1	172	1.19554	1.05852	1.1495	0.854914	0.137014	488.851	8600000	8650000
OX359193.1	173	1.7031	1.62485	1.06187	0.789745	0.0782457	279.172	8650000	8700000
OX359193.1	174	1.61682	1.6427	0.968929	0.72062	-0.0258839	-92.3511	8700000	8750000
OX359193.1	175	1.66262	1.818	0.88139	0.655515	-0.155385	-554.397	8750000	8800000
OX359194.1	0	1.28876	1.20813	1.12978	0.840247	0.0806221	287.651	0	50000
OX359194.1	1	0.76591	0.753819	1.02055	0.759009	0.0120904	43.1374	50000	100000
OX359194.1	2	0.56539	0.641857	0.877348	0.652509	-0.0764672	-272.827	100000	150000
OX359194.1	3	1.03789	0.928115	1.18606	0.882104	0.109774	391.663	150000	200000
OX359194.1	4	0.961779	0.459428	2.14989	1.59894	0.502351	1792.34	200000	250000
OX359194.1	5	0.782644	0.441173	2.16098	1.60718	0.34147	1218.33	250000	300000
OX359194.1	6	0.742311	0.982101	0.795736	0.591812	-0.23979	-855.547	300000	350000
OX359194.1	7	0.74383	0.991021	0.748689	0.556822	-0.247191	-881.951	350000	400000
OX359194.1	8	0.77043	0.701206	1.14127	0.848797	0.0692241	246.985	400000	450000
OX359194.1	9	0.88159	0.738615	1.45592	1.08281	0.142974	510.118	450000	500000
OX359194.1	10	0.736578	0.613748	1.25269	0.931664	0.12283	438.246	500000	550000
OX359194.1	11	0.755791	0.716005	1.08652	0.808075	0.0397864	141.954	550000	600000
OX359194.1	12	0.587059	0.513824	1.36129	1.01243	0.0732352	261.296	600000	650000
OX359194.1	13	0.546212	0.271293	6.01226	4.47149	0.274919	980.883	650000	700000
OX359194.1	14	0.530655	0.503886	3.796	2.8232	0.0267688	95.5083	700000	750000
OX359194.1	15	0.789341	0.750877	1.14962	0.855006	0.0384637	137.234	750000	800000
OX359194.1	16	0.385941	0.215703	1.98624	1.47723	0.170237	607.389	800000	850000
OX359194.1	17	0.172774	0.149239	1.60557	1.19411	0.0235355	83.9722	850000	900000
OX359194.1	18	0.160098	0.132745	1.16838	0.868956	0.0273535	97.5946	900000	950000
OX359194.1	19	0.305404	0.399986	1.22979	0.914631	-0.0945826	-337.461	950000	1000000
OX359194.1	20	0.360004	0.381377	0.955044	0.710294	-0.0213727	-76.2556	1000000	1050000
OX359194.1	21	0.427379	0.351245	1.27346	0.947106	0.0761345	271.64	1050000	1100000
OX359194.1	22	0.305121	0.31988	1.21231	0.901629	-0.0147597	-52.6611	1100000	1150000
OX359194.1	23	0.137383	0.178259	1.08321	0.805616	-0.0408757	-145.84	1150000	1200000
OX359194.1	24	0.0844773	0.0802462	1.44751	1.07656	0.0042311	15.0961	1200000	1250000
OX359194.1	25	0.514642	0.536936	1.0329	0.7682	-0.0222932	-79.54	1250000	1300000
OX359194.1	26	0.745995	0.778478	1.14862	0.854263	-0.0324823	-115.893	1300000	1350000
OX359194.1	27	1.00995	1.0744	0.948685	0.705564	-0.064448	-229.944	1350000	1400000
OX359194.1	28	0.388135	0.371583	0.911029	0.677558	0.0165516	59.0544	1400000	1450000
OX359194.1	29	1.0893	1.03033	1.04121	0.774375	0.0589688	210.395	1450000	1500000
OX359194.1	30	0.69006	0.636927	1.11763	0.831211	0.0531337	189.576	1500000	1550000
OX359194.1	31	1.09146	0.793227	1.50779	1.12139	0.298232	1064.06	1550000	1600000
OX359194.1	32	0.752502	0.84785	0.909174	0.676179	-0.0953482	-340.192	1600000	1650000
OX359194.1	33	0.652655	0.746067	0.755428	0.561833	-0.0934117	-333.283	1650000	1700000
OX359194.1	34	0.953853	0.915003	1.2885	0.958291	0.0388503	138.614	1700000	1750000
OX359194.1	35	0.538512	0.544897	1.04327	0.775912	-0.00638423	-22.7783	1750000	1800000
OX359194.1	36	0.241225	0.256733	1.18715	0.882919	-0.0155077	-55.33	1800000	1850000
OX359194.1	37	0.375938	0.275493	1.36382	1.01431	0.100445	358.377	1850000	1900000
OX359194.1	38	0.891556	0.844856	1.11679	0.83059	0.0466992	166.618	1900000	1950000
OX359194.1	39	0.828774	0.999007	0.812786	0.604493	-0.170233	-607.375	1950000	2000000
OX359194.1	40	1.18996	0.81939	1.57233	1.16939	0.37057	1322.16	2000000	2050000
OX359194.1	41	1.10737	0.739147	1.75825	1.30766	0.368227	1313.8	2050000	2100000
OX359194.1	42	0.63215	0.401572	1.69023	1.25707	0.230578	822.679	2100000	2150000
OX359194.1	43	0.153241	0.0981394	1.79998	1.3387	0.0551019	196.598	2150000	2200000
OX359194.1	44	0.128608	0.122145	1.21918	0.90674	0.00646279	23.0586	2200000	2250000
OX359194.1	45	0.795335	0.272325	14.4831	10.7715	0.52301	1866.05	2250000	2300000
OX359194.1	46	0.813921	0.370244	3.47424	2.58389	0.443677	1582.99	2300000	2350000
OX359194.1	47	0.923182	0.437074	3.40727	2.53409	0.486107	1734.38	2350000	2400000
OX359194.1	48	1.15695	0.773777	1.55461	1.15621	0.38317	1367.11	2400000	2450000
OX359194.1	49	0.530642	0.335527	2.21394	1.64657	0.195116	696.152	2450000	2500000
OX359194.1	50	0.723948	0.352133	3.93514	2.92668	0.371815	1326.6	2500000	2550000
OX359194.1	51	1.24199	1.02231	1.34877	1.00312	0.219679	783.791	2550000	2600000
OX359194.1	52	0.799071	0.568991	1.44522	1.07485	0.23008	820.901	2600000	2650000
OX359194.1	53	0.609467	0.538005	1.18688	0.882718	0.0714625	254.971	2650000	2700000
OX359194.1	54	1.01382	1.00015	1.07808	0.801799	0.0136647	48.7543	2700000	2750000
OX359194.1	55	0.554637	0.38693	34.0366	25.314	0.167707	598.361	2750000	2800000
OX359194.1	56	0.728027	0.614799	2.03419	1.51288	0.113228	403.987	2800000	2850000
OX359194.1	57	1.06803	1.0964	1.04685	0.778575	-0.0283706	-101.223	2850000	2900000
OX359194.1	58	0.995001	0.940501	1.06421	0.791484	0.0544995	194.449	2900000	2950000
OX359194.1	59	1.22223	1.04661	1.27853	0.950882	0.175617	626.584	2950000	3000000
OX359194.1	60	0.934136	0.743642	1.43793	1.06943	0.190495	679.666	3000000	3050000
OX359194.1	61	0.0841394	0.0807844	0.10423	0.0775189	0.00335497	11.9702	3050000	3100000
OX359194.1	62	0.287106	0.44165	1.91751	1.4261	-0.154544	-551.395	3100000	3150000
OX359194.1	63	0.99393	0.772627	1.54497	1.14904	0.221303	789.585	3150000	3200000
OX359194.1	64	1.30395	1.6179	0.809378	0.601958	-0.313956	-1120.16	3200000	3250000
OX359194.1	65	0.832537	1.10559	0.963311	0.716442	-0.273057	-974.239	3250000	3300000
OX359194.1	66	1.65416	1.98265	0.859297	0.639084	-0.328485	-1172	3300000	3350000
OX359194.1	67	1.3613	1.3241	1.05499	0.784625	0.0372027	132.735	3350000	3400000
OX359194.1	68	1.22454	1.07378	1.13768	0.846128	0.150763	537.908	3400000	3450000
OX359194.1	69	1.16893	1.32682	0.875657	0.651251	-0.157896	-563.357	3450000	3500000
OX359194.1	70	0.757935	0.954139	0.798385	0.593782	-0.196204	-700.034	3500000	3550000
OX359194.1	71	0.728174	1.06519	0.682819	0.507832	-0.33702	-1202.45	3550000	3600000
OX359194.1	72	0.830576	1.11365	0.739515	0.549998	-0.283079	-1010	3600000	3650000
OX359194.1	73	1.0381	1.14103	0.890082	0.661979	-0.10293	-367.243	3650000	3700000
OX359194.1	74	1.50163	1.64824	0.925037	0.687976	-0.14661	-523.09	3700000	3750000
OX359194.1	75	1.74114	1.93743	0.909471	0.6764	-0.196287	-700.333	3750000	3800000
OX359194.1	76	1.66459	1.79748	0.928658	0.69067	-0.132892	-474.144	3800000	3850000
OX359194.1	77	1.75639	1.83992	0.955432	0.710583	-0.0835293	-298.024	3850000	3900000
OX359194.1	78	1.33994	1.22944	1.09741	0.816176	0.110508	394.281	3900000	3950000
OX359194.1	79	0.991819	1.16272	0.836331	0.622003	-0.170903	-609.763	3950000	4000000
OX359194.1	80	1.23546	1.34883	0.909519	0.676436	-0.113367	-404.481	4000000	4050000
OX359194.1	81	0.875898	1.0678	0.82556	0.613993	-0.1919	-684.678	4050000	4100000
OX359194.1	82	0.795425	0.890795	0.893179	0.664283	-0.09537	-340.27	4100000	4150000
OX359194.1	83	0.889562	1.06634	0.840712	0.625262	-0.17678	-630.732	4150000	4200000
OX359194.1	84	0.41916	0.5193	0.664018	0.493849	-0.100139	-357.287	4200000	4250000
OX359194.1	85	1.06844	1.14177	0.934406	0.694945	-0.0733277	-261.626	4250000	4300000
OX359194.1	86	0.784387	0.86759	0.775085	0.576453	-0.0832037	-296.862	4300000	4350000
OX359194.1	87	0.937386	1.10755	0.828006	0.615812	-0.170165	-607.132	4350000	4400000
OX359194.1	88	1.13104	1.19814	0.946229	0.703738	-0.0671013	-239.411	4400000	4450000
OX359194.1	89	1.1162	1.1685	0.960317	0.714215	-0.0522983	-186.595	4450000	4500000
OX359194.1	90	1.11274	1.18749	0.932533	0.693551	-0.0747511	-266.704	4500000	4550000
OX359194.1	91	0.568227	0.627869	0.847115	0.630024	-0.0596413	-212.794	4550000	4600000
OX359194.1	92	0.654488	0.729243	0.873521	0.649662	-0.0747551	-266.718	4600000	4650000
OX359194.1	93	0.717628	0.805204	0.90646	0.67416	-0.0875764	-312.463	4650000	4700000
OX359194.1	94	1.30805	1.2984	1.01111	0.751989	0.00964495	34.4122	4700000	4750000
OX359194.1	95	1.47325	1.55124	0.967574	0.719613	-0.0779923	-278.268	4750000	4800000
OX359194.1	96	2.03373	2.20827	0.930175	0.691798	-0.174535	-622.721	4800000	4850000
OX359194.1	97	0.872195	0.969084	1.06771	0.794083	-0.0968886	-345.688	4850000	4900000
OX359194.1	98	0.836981	0.704762	1.35231	1.00575	0.13222	471.746	4900000	4950000
OX359194.1	99	0.85595	0.924363	0.904647	0.672812	-0.0684132	-244.091	4950000	5000000
OX359194.1	100	0.717108	0.710439	1.02304	0.760861	0.0066686	23.7929	5000000	5050000
OX359194.1	101	0.905334	1.15373	0.784043	0.583115	-0.248392	-886.239	5050000	5100000
OX359194.1	102	0.603945	1.09832	0.540407	0.401916	-0.494378	-1763.89	5100000	5150000
OX359194.1	103	0.475883	0.84378	0.53591	0.398572	-0.367897	-1312.62	5150000	5200000
OX359194.1	104	0.58051	0.858226	0.669066	0.497604	-0.277716	-990.862	5200000	5250000
OX359194.1	105	0.780829	0.994395	0.73025	0.543108	-0.213566	-761.981	5250000	5300000
OX359194.1	106	1.10182	0.912455	1.35281	1.00613	0.189366	675.638	5300000	5350000
OX359194.1	107	0.352045	0.439426	0.74654	0.555223	-0.0873817	-311.769	5350000	5400000
OX359194.1	108	0.10107	0.355704	0.280521	0.208631	-0.254634	-908.508	5400000	5450000
OX359194.1	109	0.131274	0.328904	0.382346	0.284362	-0.19763	-705.122	5450000	5500000
OX359194.1	110	0.144952	0.22195	0.84711	0.63002	-0.0769979	-274.72	5500000	5550000
OX359194.1	111	0.222044	0.119093	2.7874	2.07307	0.102951	367.319	5550000	5600000
OX359194.1	112	0.269852	0.14143	2.86755	2.13268	0.128422	458.197	5600000	5650000
OX359194.1	113	0.880401	0.596493	1.67462	1.24546	0.283908	1012.95	5650000	5700000
OX359194.1	114	1.1737	0.966294	1.25144	0.930729	0.207407	740.007	5700000	5750000
OX359194.1	115	0.807081	0.700918	1.2277	0.913073	0.106163	378.778	5750000	5800000
OX359194.1	116	0.817138	0.522799	1.59006	1.18257	0.294339	1050.17	5800000	5850000
OX359194.1	117	1.22499	0.967026	1.30593	0.971255	0.257965	920.391	5850000	5900000
OX359194.1	118	0.888863	0.598104	8.91622	6.63125	0.290759	1037.4	5900000	5950000
OX359194.1	119	1.27201	0.855034	1.59059	1.18297	0.416977	1487.73	5950000	6000000
OX359194.1	120	0.630597	1.12925	0.551538	0.410194	-0.498656	-1779.15	6000000	6050000
OX359194.1	121	0.616859	0.832468	0.562533	0.418372	-0.215608	-769.268	6050000	6100000
OX359194.1	122	0.465866	0.707124	0.641404	0.47703	-0.241258	-860.784	6100000	6150000
OX359194.1	123	0.799664	0.84931	0.99573	0.740553	-0.0496458	-177.131	6150000	6200000
OX359194.1	124	0.739269	0.631404	1.03309	0.768339	0.107865	384.851	6200000	6250000
OX359194.1	125	0.383384	0.427258	0.553547	0.411689	-0.0438737	-156.537	6250000	6300000
OX359194.1	126	1.08677	1.01053	1.08208	0.804773	0.0762343	271.996	6300000	6350000
OX359194.1	127	0.594045	0.709617	0.790694	0.588061	-0.115572	-412.347	6350000	6400000
OX359194.1	128	1.10065	1.0897	1.0411	0.774293	0.0109481	39.0618	6400000	6450000
OX359194.1	129	0.775473	0.619103	1.27966	0.951721	0.156371	557.914	6450000	6500000
OX359194.1	130	0.819108	0.900248	0.89198	0.663391	-0.0811402	-289.5	6500000	6550000
OX359194.1	131	1.22276	1.25644	0.962458	0.715807	-0.033688	-120.195	6550000	6600000
OX359194.1	132	0.758552	0.760278	1.4076	1.04687	-0.00172572	-6.1572	6600000	6650000
OX359194.1	133	0.777058	0.814394	0.947246	0.704494	-0.0373368	-133.214	6650000	6700000
OX359194.1	134	0.783368	0.653699	1.1786	0.876559	0.12967	462.648	6700000	6750000
OX359194.1	135	0.991414	0.808031	1.39492	1.03744	0.183384	654.294	6750000	6800000
OX359194.1	136	0.731871	0.765466	0.969057	0.720715	-0.033595	-119.863	6800000	6850000
OX359194.1	137	1.12489	1.01128	1.14085	0.848481	0.113608	405.341	6850000	6900000
OX359194.1	138	1.16908	1.68974	0.755025	0.561533	-0.520663	-1857.67	6900000	6950000
OX359194.1	139	1.00721	1.3097	0.831183	0.618175	-0.302487	-1079.24	6950000	7000000
OX359194.1	140	1.28001	1.28632	0.999053	0.743024	-0.00630705	-22.5029	7000000	7050000
OX359194.1	141	1.34191	1.4041	1.00007	0.743778	-0.062193	-221.898	7050000	7100000
OX359194.1	142	1.84683	1.90002	0.969429	0.720992	-0.0531913	-189.781	7100000	7150000
OX359194.1	143	1.28937	1.46025	0.878417	0.653304	-0.170883	-609.692	7150000	7200000
OX359194.1	144	1.91365	1.85167	1.0542	0.784041	0.0619789	221.134	7200000	7250000
OX359194.1	145	1.46148	1.23738	1.46684	1.09093	0.224096	799.551	7250000	7300000
OX359194.1	146	1.56488	1.52834	1.68595	1.25389	0.0365415	130.376	7300000	7350000
OX359194.1	147	1.76345	1.99928	0.879877	0.65439	-0.235839	-841.45	7350000	7400000
OX359194.1	148	1.23079	1.21675	1.02011	0.758682	0.0140398	50.0925	7400000	7450000
OX359194.1	149	1.63692	1.61572	1.0211	0.759419	0.021201	75.643	7450000	7500000
OX359194.1	150	1.4469	1.40112	1.09959	0.817795	0.0457756	163.323	7500000	7550000
OX359194.1	151	1.45456	1.5825	0.936095	0.6962	-0.127935	-456.458	7550000	7600000
OX359194.1	152	1.47843	1.71122	0.864113	0.642666	-0.232794	-830.585	7600000	7650000
OX359194.1	153	1.37292	1.4381	0.955714	0.710792	-0.0651767	-232.544	7650000	7700000
OX359194.1	154	0.605438	0.601764	0.920624	0.684694	0.00367394	13.1082	7700000	7750000
OX359194.1	155	1.33425	1.48356	0.891871	0.66331	-0.14931	-532.723	7750000	7800000
OX359194.1	156	1.03592	1.30978	0.798655	0.593983	-0.273857	-977.092	7800000	7850000
OX359194.1	157	0.789612	1.07449	0.761458	0.566318	-0.284877	-1016.41	7850000	7900000
OX359194.1	158	0.760192	0.657429	1.23105	0.915569	0.102763	366.648	7900000	7950000
OX359194.1	159	0.598246	0.490738	2.03267	1.51175	0.107508	383.579	7950000	8000000
OX359194.1	160	1.47799	1.40496	1.08695	0.808395	0.073026	260.549	8000000	8050000
OX359194.1	161	1.39044	1.19969	1.19911	0.891809	0.190754	680.589	8050000	8100000
OX359194.1	162	0.488632	0.420677	1.23881	0.921339	0.0679542	242.453	8100000	8150000
OX359194.1	163	0.0896233	0.149094	0.761487	0.566339	-0.0594708	-212.186	8150000	8200000
OX359194.1	164	0.330067	0.32038	1.12491	0.836628	0.00968761	34.5644	8200000	8250000
OX359194.1	165	1.14238	1.23106	0.922362	0.685987	-0.088679	-316.397	8250000	8300000
OX359194.1	166	1.61819	1.42926	1.16909	0.869489	0.188934	674.098	8300000	8350000
OX359194.1	167	1.65916	1.31829	1.26887	0.943697	0.340863	1216.16	8350000	8400000
OX359194.1	168	1.30678	1.28627	1.04416	0.776569	0.0205148	73.1947	8400000	8450000
OX359194.1	169	0.781923	0.719607	1.13991	0.847785	0.0623166	222.339	8450000	8500000
OX359194.1	170	0.606203	0.674938	1.00698	0.748917	-0.0687353	-245.24	8500000	8550000
OX359194.1	171	0.989107	0.977914	0.997483	0.741856	0.0111933	39.9366	8550000	8600000
OX359194.1	172	1.17293	1.14568	1.04638	0.778221	0.0272471	97.2147	8600000	8650000
OX359194.1	173	1.31636	1.11508	1.16872	0.869212	0.201275	718.128	8650000	8700000
OX359194.1	174	1.75219	1.5725	1.11046	0.825879	0.179695	641.134	8700000	8730000
OX359195.1	0	1.15964	1.48261	0.772188	0.574298	-0.322965	-1152.3	0	50000
OX359195.1	1	0.81231	0.602403	1.45415	1.08149	0.209907	748.925	50000	100000
OX359195.1	2	0.891916	0.827309	1.0884	0.809475	0.0646067	230.51	100000	150000
OX359195.1	3	1.24965	1.20794	1.03066	0.766529	0.0417124	148.825	150000	200000
OX359195.1	4	0.581386	0.593514	0.994124	0.739359	-0.0121285	-43.2732	200000	250000
OX359195.1	5	0.946018	0.890545	0.954042	0.709548	0.0554731	197.922	250000	300000
OX359195.1	6	0.717611	1.08971	0.655725	0.487682	-0.372095	-1327.6	300000	350000
OX359195.1	7	0.168392	0.60922	0.25631	0.190625	-0.440828	-1572.83	350000	400000
OX359195.1	8	0.389837	0.700183	0.549134	0.408407	-0.310345	-1107.28	400000	450000
OX359195.1	9	0.740346	0.676278	1.11634	0.830253	0.0640688	228.591	450000	500000
OX359195.1	10	0.204272	0.238536	0.317281	0.235971	-0.034265	-122.254	500000	550000
OX359195.1	11	0.231573	0.129023	1.17548	0.874241	0.10255	365.887	550000	600000
OX359195.1	12	0.247355	0.482021	0.307139	0.228428	-0.234666	-837.265	600000	650000
OX359195.1	13	1.31029	1.21714	1.13894	0.847062	0.0931475	332.341	650000	700000
OX359195.1	14	1.02246	0.720354	1.44632	1.07567	0.30211	1077.9	700000	750000
OX359195.1	15	1.05576	0.963074	1.11682	0.83061	0.0926833	330.684	750000	800000
OX359195.1	16	0.758584	0.759209	0.983377	0.731366	-0.000625146	-2.23046	800000	850000
OX359195.1	17	0.805077	0.698127	1.1355	0.844507	0.106951	381.589	850000	900000
OX359195.1	18	0.0964001	0.108256	0.987558	0.734475	-0.0118561	-42.3014	900000	950000
OX359195.1	19	0.136461	0.114172	2.05206	1.52618	0.0222895	79.5266	950000	1000000
OX359195.1	20	0.0612791	0.127447	0.517825	0.385121	-0.0661677	-236.08	1000000	1050000
OX359195.1	21	0.0738501	0.0751665	1.0359	0.770432	-0.00131635	-4.6966	1050000	1100000
OX359195.1	22	0.0831546	0.142019	0.593619	0.441491	-0.0588649	-210.024	1100000	1150000
OX359195.1	23	0.164766	0.130144	1.57997	1.17507	0.0346218	123.527	1150000	1200000
OX359195.1	24	0.0569479	0.0615123	1.26374	0.939877	-0.00456441	-16.2853	1200000	1250000
OX359195.1	25	0.0826549	0.104248	0.87061	0.647497	-0.0215935	-77.0432	1250000	1300000
OX359195.1	26	0.0701883	0.121894	0.67582	0.502627	-0.0517054	-184.48	1300000	1350000
OX359195.1	27	0.156601	0.154902	0.858526	0.63851	0.00169818	6.05894	1350000	1400000
OX359195.1	28	0.40268	0.353682	0.970497	0.721786	0.0489981	174.82	1400000	1450000
OX359195.1	29	0.519494	0.459899	1.16482	0.86631	0.0595954	212.63	1450000	1500000
OX359195.1	30	0.715921	0.966457	0.790216	0.587706	-0.250536	-893.886	1500000	1550000
OX359195.1	31	0.330879	0.694134	0.459223	0.341537	-0.363255	-1296.06	1550000	1600000
OX359195.1	32	0.648126	1.00096	0.615905	0.458066	-0.352832	-1258.87	1600000	1650000
OX359195.1	33	0.813407	1.11528	0.710926	0.528736	-0.301869	-1077.04	1650000	1700000
OX359195.1	34	0.584017	0.902036	0.566834	0.42157	-0.318018	-1134.66	1700000	1750000
OX359195.1	35	1.62727	1.49915	1.10116	0.818961	0.128117	457.107	1750000	1800000
OX359195.1	36	1.15286	1.00147	1.2659	0.941483	0.151394	540.158	1800000	1850000
OX359195.1	37	1.08551	0.872118	1.25525	0.933566	0.213389	761.351	1850000	1900000
OX359195.1	38	0.918181	1.18946	0.821473	0.610953	-0.271277	-967.889	1900000	1950000
OX359195.1	39	1.35902	1.78658	0.761728	0.566519	-0.427559	-1525.49	1950000	2000000
OX359195.1	40	1.42822	1.76895	0.811204	0.603316	-0.340723	-1215.66	2000000	2050000
OX359195.1	41	0.425784	0.773855	0.619897	0.461035	-0.348071	-1241.88	2050000	2100000
OX359195.1	42	0.903778	1.44366	0.758122	0.563837	-0.539884	-1926.25	2100000	2150000
OX359195.1	43	0.45747	0.701594	0.575421	0.427957	-0.244124	-871.008	2150000	2200000
OX359195.1	44	0.332946	0.697507	0.46333	0.344592	-0.364561	-1300.71	2200000	2250000
OX359195.1	45	0.64939	0.780295	0.799219	0.594402	-0.130906	-467.057	2250000	2300000
OX359195.1	46	0.662696	0.913879	0.683316	0.508202	-0.251183	-896.194	2300000	2350000
OX359195.1	47	0.377137	0.570218	0.659114	0.490202	-0.193081	-688.895	2350000	2400000
OX359195.1	48	0.0919268	0.419362	0.20896	0.15541	-0.327435	-1168.26	2400000	2450000
OX359195.1	49	0.0940346	0.440125	0.201258	0.149682	-0.346091	-1234.82	2450000	2500000
OX359195.1	50	0.156545	0.521426	0.228517	0.169954	-0.36488	-1301.86	2500000	2550000
OX359195.1	51	0.126413	0.485206	0.225877	0.167992	-0.358793	-1280.14	2550000	2600000
OX359195.1	52	0.0888864	0.438667	0.187953	0.139786	-0.349781	-1247.98	2600000	2650000
OX359195.1	53	0.162577	0.465498	0.3569	0.265436	-0.302921	-1080.79	2650000	2700000
OX359195.1	54	0.128733	0.45326	0.264569	0.196768	-0.324526	-1157.88	2700000	2750000
OX359195.1	55	0.523537	0.641891	0.808988	0.601668	-0.118354	-422.275	2750000	2800000
OX359195.1	56	0.553792	0.908281	0.600544	0.446642	-0.354488	-1264.78	2800000	2850000
OX359195.1	57	0.48983	1.01874	0.482633	0.358948	-0.528914	-1887.11	2850000	2900000
OX359195.1	58	0.925995	1.11303	0.805637	0.599175	-0.187034	-667.318	2900000	2950000
OX359195.1	59	0.829845	1.06581	0.747821	0.556176	-0.235962	-841.889	2950000	3000000
OX359195.1	60	0.563281	0.795351	0.714722	0.53156	-0.232071	-828.004	3000000	3050000
OX359195.1	61	1.03887	1.31687	0.785547	0.584234	-0.277999	-991.871	3050000	3100000
OX359195.1	62	1.01622	1.14209	0.892289	0.663621	-0.125872	-449.098	3100000	3150000
OX359195.1	63	1.49809	1.73204	0.859085	0.638926	-0.23394	-834.675	3150000	3200000
OX359195.1	64	1.20615	1.40076	0.821512	0.610982	-0.194606	-694.333	3200000	3250000
OX359195.1	65	1.06765	1.19242	0.889616	0.661633	-0.12477	-445.165	3250000	3300000
OX359195.1	66	0.736802	0.895977	0.791451	0.588625	-0.159176	-567.923	3300000	3350000
OX359195.1	67	0.87781	0.980523	0.891548	0.66307	-0.102713	-366.47	3350000	3400000
OX359195.1	68	0.278889	0.411031	0.585548	0.435489	-0.132142	-471.468	3400000	3450000
OX359195.1	69	0.152741	0.330737	0.461834	0.343479	-0.177996	-635.07	3450000	3500000
OX359195.1	70	0.155614	0.36425	0.424897	0.316008	-0.208637	-744.395	3500000	3550000
OX359195.1	71	0.157672	0.35709	0.440653	0.327726	-0.199417	-711.5	3550000	3600000
OX359195.1	72	0.140988	0.357219	0.396535	0.294914	-0.216232	-771.493	3600000	3650000
OX359195.1	73	0.164834	0.325196	0.510013	0.379311	-0.160363	-572.157	3650000	3700000
OX359195.1	74	0.170454	0.349728	0.491312	0.365403	-0.179274	-639.632	3700000	3750000
OX359195.1	75	0.20131	0.299897	0.442963	0.329445	-0.0985864	-351.746	3750000	3800000
OX359195.1	76	0.136816	0.345632	0.362944	0.269932	-0.208816	-745.035	3800000	3850000
OX359195.1	77	1.09011	1.07304	0.918183	0.682879	0.017072	60.9112	3850000	3900000
OX359195.1	78	0.951479	1.01526	0.915443	0.680841	-0.0637779	-227.553	3900000	3950000
OX359195.1	79	0.28235	0.43407	0.633036	0.470807	-0.15172	-541.321	3950000	4000000
OX359195.1	80	0.501462	0.495427	1.00737	0.749211	0.00603576	21.535	4000000	4050000
OX359195.1	81	0.747806	0.777813	0.948474	0.705407	-0.0300078	-107.065	4050000	4100000
OX359195.1	82	1.09115	1.21259	0.901416	0.670409	-0.121433	-433.259	4100000	4150000
OX359195.1	83	0.795484	0.946558	0.837868	0.623146	-0.151074	-539.016	4150000	4200000
OX359195.1	84	0.982235	1.09457	0.882542	0.656372	-0.112332	-400.789	4200000	4250000
OX359195.1	85	0.793933	0.909953	0.871706	0.648313	-0.11602	-413.947	4250000	4300000
OX359195.1	86	1.19613	1.25922	0.943432	0.701657	-0.0630952	-225.117	4300000	4350000
OX359195.1	87	1.76449	1.8132	0.972512	0.723285	-0.0487038	-173.77	4350000	4400000
OX359195.1	88	1.67274	1.8263	0.913177	0.679156	-0.153565	-547.904	4400000	4450000
OX359195.1	89	1.58506	1.68023	0.95157	0.70771	-0.0951699	-339.556	4450000	4500000
OX359195.1	90	1.56103	1.68302	0.921857	0.685612	-0.121987	-435.239	4500000	4550000
OX359195.1	91	1.4857	1.52894	0.958392	0.712783	-0.0432435	-154.288	4550000	4600000
OX359195.1	92	1.34692	1.42487	0.93762	0.697335	-0.0779551	-278.136	4600000	4650000
OX359195.1	93	1.32971	1.2282	1.09053	0.811058	0.101505	362.158	4650000	4700000
OX359195.1	94	0.912648	0.847659	1.05403	0.783915	0.0649891	231.875	4700000	4750000
OX359195.1	95	0.809134	1.5406	0.507939	0.377769	-0.731466	-2609.8	4750000	4800000
OX359195.1	96	0.958011	1.33789	0.804851	0.598591	-0.379882	-1355.38	4800000	4850000
OX359195.1	97	0.733658	0.833367	0.956149	0.711115	-0.0997096	-355.753	4850000	4900000
OX359195.1	98	1.02838	0.868749	1.20459	0.895892	0.159626	569.529	4900000	4950000
OX359195.1	99	0.434379	0.550102	0.787733	0.58586	-0.115723	-412.888	4950000	5000000
OX359195.1	100	0.575852	0.600362	0.946614	0.704024	-0.0245102	-87.4499	5000000	5050000
OX359195.1	101	1.24086	1.43611	0.856853	0.637266	-0.195242	-696.604	5050000	5100000
OX359195.1	102	1.11601	1.41644	0.774747	0.576202	-0.300431	-1071.91	5100000	5150000
OX359195.1	103	1.05381	1.21159	0.863299	0.64206	-0.15778	-562.941	5150000	5200000
OX359195.1	104	0.889585	0.841352	1.09011	0.810747	0.048233	172.09	5200000	5250000
OX359195.1	105	0.93648	1.10785	0.836055	0.621798	-0.171374	-611.446	5250000	5300000
OX359195.1	106	1.076	0.891509	1.27645	0.949329	0.184496	658.261	5300000	5350000
OX359195.1	107	0.485899	0.178027	14.1881	10.5521	0.307873	1098.46	5350000	5400000
OX359195.1	108	0.647003	0.698226	1.36664	1.01641	-0.0512233	-182.76	5400000	5450000
OX359195.1	109	0.989943	0.88621	1.18807	0.883603	0.103733	370.109	5450000	5500000
OX359195.1	110	0.932742	1.04206	0.905379	0.673356	-0.109316	-390.03	5500000	5550000
OX359195.1	111	0.696156	0.949484	0.690441	0.513501	-0.253329	-903.851	5550000	5600000
OX359195.1	112	1.13649	1.39128	0.813573	0.605078	-0.254783	-909.04	5600000	5650000
OX359195.1	113	1.41405	1.31523	1.12881	0.839526	0.0988207	352.582	5650000	5700000
OX359195.1	114	1.31083	1.1108	1.1858	0.881914	0.200038	713.714	5700000	5750000
OX359195.1	115	0.713243	0.64737	1.1316	0.841601	0.065873	235.028	5750000	5800000
OX359195.1	116	0.993375	0.902963	1.13099	0.841147	0.0904125	322.582	5800000	5850000
OX359195.1	117	0.663366	0.628552	1.57664	1.17259	0.0348145	124.215	5850000	5900000
OX359195.1	118	0.663968	0.597707	1.3292	0.988565	0.0662605	236.411	5900000	5950000
OX359195.1	119	1.33409	1.20375	1.12012	0.833064	0.130341	465.042	5950000	6000000
OX359195.1	120	0.449922	0.650007	0.453718	0.337443	-0.200086	-713.884	6000000	6050000
OX359195.1	121	0.0617876	0.370294	0.135513	0.100785	-0.308506	-1100.72	6050000	6100000
OX359195.1	122	0.747179	0.841571	0.729756	0.542741	-0.0943924	-336.782	6100000	6150000
OX359195.1	123	0.704343	0.945292	0.672864	0.500428	-0.240949	-859.68	6150000	6200000
OX359195.1	124	1.765	1.70849	1.0284	0.764848	0.056511	201.625	6200000	6250000
OX359195.1	125	1.35965	1.35774	1.00893	0.750369	0.00190696	6.80384	6250000	6300000
OX359195.1	126	0.995703	0.967045	1.0255	0.762692	0.0286583	102.25	6300000	6350000
OX359195.1	127	0.718393	0.628478	1.22383	0.910198	0.0899146	320.806	6350000	6400000
OX359195.1	128	0.968773	0.784562	1.29355	0.96205	0.184211	657.246	6400000	6450000
OX359195.1	129	1.07729	0.959373	1.13239	0.842193	0.117916	420.713	6450000	6500000
OX359195.1	130	1.27941	1.1826	1.11251	0.827404	0.0968133	345.42	6500000	6550000
OX359195.1	131	1.02515	1.04548	1.01341	0.753702	-0.0203299	-72.5351	6550000	6600000
OX359195.1	132	1.35697	1.29151	1.06915	0.795159	0.0654574	233.545	6600000	6650000
OX359195.1	133	1.87634	1.48602	1.2722	0.946169	0.390322	1392.63	6650000	6700000
OX359195.1	134	1.60641	1.39016	1.15617	0.859877	0.216242	771.528	6700000	6750000
OX359195.1	135	1.34225	1.54137	0.873185	0.649413	-0.199124	-710.454	6750000	6800000
OX359195.1	136	1.29342	1.30452	0.992969	0.7385	-0.0110927	-39.5776	6800000	6850000
OX359195.1	137	1.38834	1.48464	0.927331	0.689683	-0.0963019	-343.595	6850000	6900000
OX359195.1	138	0.613668	0.322797	2.38195	1.77153	0.290871	1037.8	6900000	6950000
OX359195.1	139	0.899652	0.805105	1.24759	0.927871	0.0945473	337.335	6950000	7000000
OX359195.1	140	1.53801	1.43539	1.06215	0.789954	0.102615	366.12	7000000	7050000
OX359195.1	141	0.954563	1.03946	0.939719	0.698896	-0.084892	-302.886	7050000	7100000
OX359195.1	142	0.860357	0.779927	1.09343	0.813212	0.0804295	286.964	7100000	7150000
OX359195.1	143	0.995646	0.97439	1.15103	0.856053	0.021256	75.8392	7150000	7200000
OX359195.1	144	1.25431	1.15379	1.10326	0.820523	0.100518	358.639	7200000	7250000
OX359195.1	145	0.910294	0.805619	1.20048	0.892829	0.104675	373.47	7250000	7300000
OX359195.1	146	1.6861	1.56647	1.07679	0.800838	0.119639	426.859	7300000	7350000
OX359195.1	147	0.820749	0.841152	0.93186	0.693051	-0.0204024	-72.7936	7350000	7400000
OX359195.1	148	0.985478	1.10028	0.901737	0.670648	-0.1148	-409.596	7400000	7450000
OX359195.1	149	1.48822	1.63679	0.908746	0.675861	-0.148564	-530.061	7450000	7500000
OX359195.1	150	1.73446	1.25141	1.42656	1.06097	0.483057	1723.5	7500000	7550000
OX359195.1	151	1.19041	1.22199	0.937616	0.697332	-0.0315797	-112.673	7550000	7600000
OX359195.1	152	1.34195	1.61912	0.826755	0.614881	-0.277169	-988.909	7600000	7650000
OX359195.1	153	0.640228	0.559626	24.2861	18.0623	0.0806012	287.577	7650000	7700000
OX359195.1	154	0.768475	0.710838	26.1727	19.4654	0.0576371	205.643	7700000	7750000
OX359195.1	155	1.24247	1.03073	1.32503	0.985465	0.211744	755.482	7750000	7800000
OX359195.1	156	1.30334	1.13372	1.09354	0.813294	0.169618	605.178	7800000	7850000
OX359195.1	157	1.18054	1.09756	1.0879	0.809103	0.0829777	296.056	7850000	7900000
OX359195.1	158	0.653584	0.647825	1.11575	0.829816	0.00575963	20.5498	7900000	7950000
OX359195.1	159	0.950416	0.609101	1.61301	1.19964	0.341315	1217.78	7950000	8000000
OX359195.1	160	0.336591	0.182765	2.18345	1.6239	0.153826	548.837	8000000	8050000
OX359195.1	161	1.28349	1.2169	1.05948	0.787965	0.0665854	237.57	8050000	8100000
OX359195.1	162	1.36258	1.31288	1.05665	0.785863	0.0497035	177.337	8100000	8150000
OX359195.1	163	1.31472	1.16367	1.16076	0.86329	0.151043	538.906	8150000	8200000
OX359195.1	164	1.50903	1.50436	1.02251	0.760472	0.00466603	16.6479	8200000	8250000
OX359195.1	165	1.38587	1.33442	1.0972	0.816017	0.0514472	183.558	8250000	8300000
OX359195.1	166	0.98823	0.96218	1.04666	0.778434	0.0260503	92.9449	8300000	8350000
OX359195.1	167	0.90496	0.893694	1.00562	0.747911	0.0112665	40.1979	8350000	8400000
OX359195.1	168	0.874447	1.1328	0.787295	0.585534	-0.258349	-921.764	8400000	8450000
OX359195.1	169	0.0312357	0.0619996	0.503804	0.374693	-0.030764	-109.763	8450000	8455000
OX359196.1	0	1.13554	1.1217	1.02301	0.760841	0.0138355	49.3637	0	50000
OX359196.1	1	1.50178	1.36786	1.37604	1.0234	0.133926	477.834	50000	100000
OX359196.1	2	1.50262	1.21798	1.39452	1.03714	0.284641	1015.57	100000	150000
OX359196.1	3	1.45499	1.44594	1.04517	0.777322	0.00905011	32.2899	150000	200000
OX359196.1	4	1.46854	1.25131	1.2011	0.893295	0.217232	775.063	200000	250000
OX359196.1	5	1.29068	1.06141	1.25085	0.930293	0.229272	818.019	250000	300000
OX359196.1	6	0.52116	0.681671	0.747626	0.556031	-0.160511	-572.687	300000	350000
OX359196.1	7	1.16214	1.50057	0.755091	0.561583	-0.338425	-1207.47	350000	400000
OX359196.1	8	1.09894	1.10179	1.0069	0.748861	-0.0028465	-10.156	400000	450000
OX359196.1	9	0.389129	0.69253	0.500199	0.372012	-0.303401	-1082.5	450000	500000
OX359196.1	10	0.546899	0.945049	0.563884	0.419377	-0.39815	-1420.56	500000	550000
OX359196.1	11	0.960379	1.30031	0.738341	0.549125	-0.339929	-1212.83	550000	600000
OX359196.1	12	1.18484	1.36471	0.862564	0.641514	-0.179865	-641.741	600000	650000
OX359196.1	13	1.40911	1.21745	1.15949	0.862349	0.191659	683.819	650000	700000
OX359196.1	14	0.870966	1.07158	0.809863	0.602318	-0.200617	-715.782	700000	750000
OX359196.1	15	0.762687	0.76373	1.10034	0.818356	-0.00104212	-3.71819	750000	800000
OX359196.1	16	1.11315	0.998969	1.18781	0.883411	0.114183	407.392	800000	850000
OX359196.1	17	0.853158	0.615839	1.50849	1.12191	0.237319	846.731	850000	900000
OX359196.1	18	0.64459	0.681272	0.90837	0.675581	-0.0366819	-130.877	900000	950000
OX359196.1	19	0.647502	0.38659	2.02419	1.50545	0.260912	930.907	950000	1000000
OX359196.1	20	1.17731	0.843855	1.81467	1.34962	0.33345	1189.72	1000000	1050000
OX359196.1	21	0.994843	0.816601	1.27326	0.946957	0.178242	635.95	1050000	1100000
OX359196.1	22	0.781876	0.594955	1.42933	1.06303	0.186921	666.914	1100000	1150000
OX359196.1	23	0.58618	0.46846	1.31366	0.977004	0.11772	420.014	1150000	1200000
OX359196.1	24	0.793435	0.782737	1.1731	0.872467	0.0106981	38.1697	1200000	1250000
OX359196.1	25	0.973647	0.875977	1.15247	0.857128	0.0976697	348.475	1250000	1300000
OX359196.1	26	1.08813	1.05364	1.07538	0.799794	0.0344871	123.047	1300000	1350000
OX359196.1	27	0.732895	0.708356	1.13198	0.841884	0.0245394	87.554	1350000	1400000
OX359196.1	28	0.468181	0.453675	1.04959	0.780607	0.0145062	51.7568	1400000	1450000
OX359196.1	29	0.98014	0.921569	1.03002	0.766053	0.0585712	208.976	1450000	1500000
OX359196.1	30	1.18873	1.01933	1.16896	0.86939	0.1694	604.402	1500000	1550000
OX359196.1	31	0.892128	0.900103	1.00418	0.746841	-0.00797424	-28.4513	1550000	1600000
OX359196.1	32	1.11687	1.12845	0.995451	0.740345	-0.0115787	-41.3116	1600000	1650000
OX359196.1	33	0.598713	0.802483	0.733812	0.545757	-0.20377	-727.031	1650000	1700000
OX359196.1	34	1.19322	1.17143	1.02227	0.760293	0.0217853	77.7278	1700000	1750000
OX359196.1	35	1.17154	1.36051	0.86959	0.646739	-0.188975	-674.242	1750000	1800000
OX359196.1	36	1.12255	1.71518	0.653966	0.486373	-0.592633	-2114.45	1800000	1850000
OX359196.1	37	1.35354	1.73287	0.78216	0.581714	-0.379333	-1353.42	1850000	1900000
OX359196.1	38	1.1655	1.36231	0.844979	0.628435	-0.196805	-702.179	1900000	1950000
OX359196.1	39	1.50027	1.44845	1.0359	0.770429	0.0518242	184.903	1950000	2000000
OX359196.1	40	1.51103	1.46008	1.02985	0.765927	0.0509464	181.772	2000000	2050000
OX359196.1	41	1.61703	1.66019	0.978268	0.727566	-0.0431598	-153.99	2050000	2100000
OX359196.1	42	1.58401	1.7648	0.901625	0.670565	-0.180787	-645.028	2100000	2150000
OX359196.1	43	1.81465	1.96918	0.924554	0.687617	-0.15453	-551.347	2150000	2200000
OX359196.1	44	1.78014	1.72623	1.0983	0.816838	0.0539152	192.364	2200000	2250000
OX359196.1	45	1.13293	0.699779	1.84629	1.37314	0.433153	1545.45	2250000	2300000
OX359196.1	46	1.78787	1.91911	0.928407	0.690483	-0.131236	-468.236	2300000	2350000
OX359196.1	47	1.95324	1.73176	1.1391	0.847184	0.221477	790.208	2350000	2400000
OX359196.1	48	1.55547	1.52218	1.02069	0.75912	0.0332865	118.763	2400000	2450000
OX359196.1	49	1.52122	1.40737	1.08437	0.806474	0.11385	406.205	2450000	2500000
OX359196.1	50	1.45349	1.39996	1.03889	0.772652	0.0535214	190.959	2500000	2550000
OX359196.1	51	1.60549	1.51319	1.06112	0.789184	0.092308	329.345	2550000	2600000
OX359196.1	52	1.90719	1.92094	0.996722	0.74129	-0.0137492	-49.0557	2600000	2650000
OX359196.1	53	1.86855	1.90471	0.982886	0.731	-0.0361514	-128.984	2650000	2700000
OX359196.1	54	1.75361	1.63273	1.0855	0.807317	0.120885	431.305	2700000	2750000
OX359196.1	55	1.4759	1.38302	1.07306	0.798062	0.0928828	331.396	2750000	2800000
OX359196.1	56	1.52648	1.39276	1.11209	0.827094	0.133727	477.125	2800000	2850000
OX359196.1	57	1.36057	1.33933	1.02145	0.759682	0.0212335	75.759	2850000	2900000
OX359196.1	58	1.42812	1.44542	0.985477	0.732928	-0.0173	-61.7246	2900000	2950000
OX359196.1	59	1.56241	1.50893	1.03615	0.770611	0.0534814	190.816	2950000	3000000
OX359196.1	60	1.74959	1.6658	1.0504	0.781215	0.0837847	298.935	3000000	3050000
OX359196.1	61	1.32499	1.34375	0.969274	0.720877	-0.0187588	-66.9295	3050000	3100000
OX359196.1	62	1.2093	1.06798	1.24029	0.92244	0.14132	504.217	3100000	3150000
OX359196.1	63	1.32802	1.30073	1.02963	0.765766	0.0272853	97.3512	3150000	3200000
OX359196.1	64	1.47134	1.30283	1.13983	0.847724	0.168515	601.243	3200000	3250000
OX359196.1	65	1.57667	1.496	1.04987	0.780819	0.0806728	287.832	3250000	3300000
OX359196.1	66	1.74173	1.56921	1.10948	0.825149	0.172516	615.52	3300000	3350000
OX359196.1	67	1.56568	1.34198	1.17107	0.87096	0.223695	798.122	3350000	3400000
OX359196.1	68	1.84039	1.62387	1.14372	0.850615	0.216527	772.548	3400000	3450000
OX359196.1	69	1.43041	1.29031	1.14445	0.851159	0.140102	499.871	3450000	3500000
OX359196.1	70	1.68844	1.62498	1.03749	0.771609	0.0634524	226.392	3500000	3550000
OX359196.1	71	1.60805	1.58522	1.00158	0.744906	0.0228371	81.4804	3550000	3600000
OX359196.1	72	0.907789	0.926475	0.962478	0.715823	-0.0186853	-66.6673	3600000	3650000
OX359196.1	73	1.35993	1.32338	1.0207	0.759127	0.0365419	130.378	3650000	3700000
OX359196.1	74	2.32215	2.26487	1.02505	0.762356	0.0572791	204.366	3700000	3750000
OX359196.1	75	2.12662	2.05653	1.035	0.769756	0.070092	250.081	3750000	3800000
OX359196.1	76	1.77822	2.03652	0.885072	0.658254	-0.258299	-921.585	3800000	3850000
OX359196.1	77	1.79425	1.86296	0.968697	0.720448	-0.0687103	-245.151	3850000	3900000
OX359196.1	78	1.59058	1.47979	1.10786	0.823951	0.110788	395.28	3900000	3950000
OX359196.1	79	1.26642	1.33381	0.931164	0.692533	-0.0673842	-240.42	3950000	4000000
OX359196.1	80	1.44616	1.288	1.1416	0.84904	0.158153	564.275	4000000	4050000
OX359196.1	81	1.2212	1.1302	1.07757	0.801421	0.0910008	324.682	4050000	4100000
OX359196.1	82	0.822869	0.953534	0.904002	0.672333	-0.130665	-466.2	4100000	4150000
OX359196.1	83	0.788497	0.684223	1.12266	0.834954	0.104274	372.037	4150000	4200000
OX359196.1	84	0.794566	0.703062	1.25494	0.933335	0.0915049	326.48	4200000	4250000
OX359196.1	85	1.09609	1.05758	1.02891	0.765229	0.038514	137.414	4250000	4300000
OX359196.1	86	1.18019	1.03157	1.15331	0.85775	0.148619	530.256	4300000	4350000
OX359196.1	87	1.21169	1.00683	1.30199	0.968328	0.204863	730.932	4350000	4400000
OX359196.1	88	1.12498	1.00627	1.15578	0.859588	0.118714	423.559	4400000	4450000
OX359196.1	89	1.19436	1.11102	1.07364	0.798495	0.0833438	297.362	4450000	4500000
OX359196.1	90	1.32614	1.12482	1.18016	0.877719	0.201315	718.27	4500000	4550000
OX359196.1	91	0.87027	0.873042	1.11247	0.827379	-0.00277275	-9.89288	4550000	4600000
OX359196.1	92	1.28027	1.47846	0.861967	0.64107	-0.198189	-707.119	4600000	4650000
OX359196.1	93	0.835369	0.694645	1.27924	0.951405	0.140723	502.085	4650000	4700000
OX359196.1	94	1.01235	0.682997	1.58771	1.18082	0.329355	1175.1	4700000	4750000
OX359196.1	95	1.31538	1.40395	0.971285	0.722373	-0.0885728	-316.019	4750000	4800000
OX359196.1	96	0.953597	1.43235	0.686469	0.510546	-0.478755	-1708.15	4800000	4850000
OX359196.1	97	0.38116	0.598515	0.639212	0.4754	-0.217355	-775.499	4850000	4900000
OX359196.1	98	1.41105	1.4173	0.983113	0.731169	-0.00624534	-22.2827	4900000	4950000
OX359196.1	99	1.27608	1.16991	1.0965	0.815498	0.10617	378.804	4950000	5000000
OX359196.1	100	0.712632	0.837979	0.832203	0.618933	-0.125347	-447.225	5000000	5050000
OX359196.1	101	0.784069	0.760654	1.02017	0.758729	0.0234149	83.5419	5050000	5100000
OX359196.1	102	0.909565	0.803948	1.49368	1.11089	0.105617	376.831	5100000	5150000
OX359196.1	103	0.994072	0.639721	1.90496	1.41677	0.354352	1264.29	5150000	5200000
OX359196.1	104	1.60043	1.22682	1.31886	0.980875	0.373613	1333.01	5200000	5250000
OX359196.1	105	1.37668	1.3593	1.01343	0.753715	0.0173763	61.9967	5250000	5300000
OX359196.1	106	1.20334	1.16185	1.0712	0.796681	0.0414972	148.058	5300000	5350000
OX359196.1	107	1.40253	1.37272	1.05791	0.786801	0.0298124	106.368	5350000	5400000
OX359196.1	108	1.59844	1.68859	0.941317	0.700085	-0.090147	-321.635	5400000	5450000
OX359196.1	109	1.50857	1.418	1.09915	0.817468	0.0905769	323.169	5450000	5500000
OX359196.1	110	1.46031	1.31282	1.12575	0.837251	0.147483	526.204	5500000	5550000
OX359196.1	111	1.63705	1.62257	1.02251	0.760473	0.0144722	51.6354	5550000	5600000
OX359196.1	112	1.53709	1.46787	1.04947	0.780522	0.0692274	246.996	5600000	5650000
OX359196.1	113	1.31745	1.13329	1.11344	0.8281	0.184161	657.066	5650000	5700000
OX359196.1	114	1.7116	1.79886	0.95652	0.711391	-0.0872554	-311.318	5700000	5750000
OX359196.1	115	1.74351	1.45787	1.25482	0.933248	0.285637	1019.12	5750000	5800000
OX359196.1	116	1.48382	1.45834	1.03453	0.769409	0.0254841	90.9247	5800000	5850000
OX359196.1	117	1.49488	1.46144	0.989823	0.73616	0.0334396	119.309	5850000	5900000
OX359196.1	118	1.60565	1.56346	1.03152	0.767173	0.0421954	150.549	5900000	5950000
OX359196.1	119	1.34459	1.32845	1.05534	0.784888	0.0161378	57.5779	5950000	6000000
OX359196.1	120	1.62972	1.46157	1.10973	0.825335	0.168155	599.96	6000000	6050000
OX359196.1	121	1.27919	1.33377	0.972209	0.723059	-0.0545805	-194.738	6050000	6100000
OX359196.1	122	1.18287	1.26123	0.947596	0.704754	-0.078361	-279.584	6100000	6150000
OX359196.1	123	1.26684	1.3798	0.942018	0.700606	-0.112963	-403.039	6150000	6200000
OX359196.1	124	1.29058	1.29057	1.01765	0.756857	9.63739e-06	0.0343852	6200000	6250000
OX359196.1	125	0.974802	0.957629	0.951961	0.708001	0.0171727	61.2706	6250000	6300000
OX359196.1	126	1.19067	1.16033	1.09766	0.816358	0.0303404	108.251	6300000	6350000
OX359196.1	127	1.28989	1.43493	0.915347	0.68077	-0.145039	-517.485	6350000	6400000
OX359196.1	128	1.0117	1.01384	1.06184	0.78972	-0.00214318	-7.64664	6400000	6450000
OX359196.1	129	1.40774	1.56148	0.898214	0.668027	-0.153742	-548.536	6450000	6500000
OX359196.1	130	1.2922	1.23504	1.06466	0.791818	0.0571523	203.914	6500000	6550000
OX359196.1	131	1.5468	1.50326	1.07898	0.802471	0.0435456	155.366	6550000	6600000
OX359196.1	132	1.37434	1.39863	0.965396	0.717992	-0.0242906	-86.6663	6600000	6650000
OX359196.1	133	1.00721	1.06601	0.927815	0.690043	-0.0588042	-209.807	6650000	6700000
OX359196.1	134	1.39183	1.36434	1.02717	0.763938	0.0274875	98.0725	6700000	6750000
OX359196.1	135	0.94546	1.30757	0.919	0.683487	-0.362108	-1291.96	6750000	6800000
OX359196.1	136	0.483146	1.17597	0.51929	0.386211	-0.692825	-2471.93	6800000	6850000
OX359196.1	137	0.686912	0.709736	0.85294	0.634356	-0.0228239	-81.4333	6850000	6900000
OX359196.1	138	1.03665	1.05264	1.04655	0.778352	-0.0159907	-57.053	6900000	6950000
OX359196.1	139	1.31006	1.25562	1.03921	0.772888	0.0544309	194.204	6950000	7000000
OX359196.1	140	1.39901	1.15346	1.47173	1.09457	0.245552	876.106	7000000	7050000
OX359196.1	141	1.26902	1.23302	1.10619	0.822709	0.0359967	128.433	7050000	7100000
OX359196.1	142	1.09112	0.992392	1.2663	0.941787	0.0987272	352.248	7100000	7150000
OX359196.1	143	1.09482	1.18117	0.930845	0.692296	-0.0863451	-308.071	7150000	7200000
OX359196.1	144	1.47719	1.49517	0.992964	0.738496	-0.0179739	-64.1291	7200000	7250000
OX359196.1	145	1.22955	1.03353	1.21489	0.903545	0.196017	699.367	7250000	7300000
OX359196.1	146	1.33735	1.3309	1.14749	0.853421	0.00645141	23.018	7300000	7350000
OX359196.1	147	0.92525	0.875866	0.978197	0.727513	0.0493836	176.196	7350000	7400000
OX359196.1	148	0.340833	0.287229	1.13469	0.843898	0.0536033	191.251	7400000	7450000
OX359196.1	149	1.0361	1.02307	0.990532	0.736687	0.0130394	46.5232	7450000	7500000
OX359196.1	150	1.10679	1.02303	1.16401	0.865711	0.0837563	298.834	7500000	7550000
OX359196.1	151	1.11123	1.43169	0.809257	0.601868	-0.320466	-1143.39	7550000	7600000
OX359196.1	152	1.23922	1.60707	0.745893	0.554742	-0.36785	-1312.45	7600000	7650000
OX359196.1	153	0.782063	0.863106	0.947168	0.704436	-0.0810427	-289.152	7650000	7700000
OX359196.1	154	0.595236	0.582246	1.05423	0.784059	0.0129902	46.3475	7700000	7750000
OX359196.1	155	1.33842	1.31235	0.998272	0.742444	0.0260621	92.9869	7750000	7800000
OX359196.1	156	1.55215	1.51995	1.02701	0.763817	0.0321985	114.881	7800000	7850000
OX359196.1	157	1.25923	1.40121	0.896304	0.666607	-0.141984	-506.585	7850000	7900000
OX359196.1	158	1.45628	1.38988	1.04043	0.773795	0.0663922	236.88	7900000	7950000
OX359196.1	159	1.1963	1.10217	1.08637	0.807968	0.094135	335.864	7950000	8000000
OX359196.1	160	1.65213	1.44166	1.13936	0.847376	0.210475	750.953	8000000	8050000
OX359196.1	161	1.60039	1.47467	1.05991	0.788286	0.12572	448.557	8050000	8100000
OX359196.1	162	1.42287	1.40958	1.03601	0.770508	0.0132975	47.4442	8100000	8125000
OX359197.1	0	1.05029	1.0682	2.53457	1.88503	-0.0179155	-63.9206	0	50000
OX359197.1	1	0.778286	0.650836	15.5869	11.5924	0.12745	454.729	50000	100000
OX359197.1	2	1.23708	1.1474	1.11537	0.829536	0.0896811	319.973	100000	150000
OX359197.1	3	0.646529	0.763314	1.18925	0.884477	-0.116784	-416.674	150000	200000
OX359197.1	4	0.482635	0.466963	1.28273	0.954002	0.0156712	55.9131	200000	250000
OX359197.1	5	0.387232	0.48445	0.752391	0.559575	-0.0972175	-346.862	250000	300000
OX359197.1	6	0.855449	0.886013	1.0237	0.761353	-0.0305634	-109.047	300000	350000
OX359197.1	7	0.649875	0.663959	1.01006	0.751213	-0.0140839	-50.2497	350000	400000
OX359197.1	8	0.629556	0.575518	1.15838	0.861519	0.0540381	192.802	400000	450000
OX359197.1	9	0.991766	0.388975	2.98284	2.21843	0.602791	2150.7	450000	500000
OX359197.1	10	1.28298	0.979089	1.56104	1.16099	0.303895	1084.26	500000	550000
OX359197.1	11	0.938105	1.19141	0.775421	0.576703	-0.253309	-903.78	550000	600000
OX359197.1	12	0.790859	1.06645	0.716584	0.532944	-0.275594	-983.291	600000	650000
OX359197.1	13	0.765923	0.847675	0.98957	0.735972	-0.0817521	-291.683	650000	700000
OX359197.1	14	0.304859	0.322219	1.14307	0.850136	-0.0173594	-61.9364	700000	750000
OX359197.1	15	0.562087	0.601324	0.878957	0.653705	-0.039237	-139.994	750000	800000
OX359197.1	16	0.911153	0.926074	1.07243	0.797599	-0.0149211	-53.2371	800000	850000
OX359197.1	17	0.796667	0.822886	1.09295	0.81286	-0.0262192	-93.5474	850000	900000
OX359197.1	18	0.844443	0.995292	0.885924	0.658887	-0.150849	-538.214	900000	950000
OX359197.1	19	0.337902	0.485136	0.690964	0.51389	-0.147235	-525.318	950000	1000000
OX359197.1	20	0.692792	0.669538	1.75181	1.30287	0.0232534	82.9658	1000000	1050000
OX359197.1	21	1.15017	1.04458	1.18488	0.881227	0.105595	376.752	1050000	1100000
OX359197.1	22	1.01425	1.11102	0.93348	0.694256	-0.0967682	-345.259	1100000	1150000
OX359197.1	23	1.03511	1.11807	0.934484	0.695002	-0.0829574	-295.984	1150000	1200000
OX359197.1	24	0.61248	0.705422	0.817066	0.607676	-0.0929422	-331.608	1200000	1250000
OX359197.1	25	1.0281	1.23073	0.856745	0.637186	-0.202627	-722.954	1250000	1300000
OX359197.1	26	0.69154	0.610723	1.15447	0.858612	0.0808167	288.346	1300000	1350000
OX359197.1	27	0.693755	0.584942	1.29419	0.96253	0.108813	388.232	1350000	1400000
OX359197.1	28	0.507049	0.401797	1.55179	1.15411	0.105252	375.528	1400000	1450000
OX359197.1	29	0.671321	0.622824	1.11264	0.827499	0.0484971	173.033	1450000	1500000
OX359197.1	30	0.447456	0.447688	1.08535	0.807205	-0.000232117	-0.828169	1500000	1550000
OX359197.1	31	0.805516	0.445843	2.30022	1.71074	0.359673	1283.28	1550000	1600000
OX359197.1	32	0.863505	0.843463	1.05695	0.786087	0.0200423	71.509	1600000	1650000
OX359197.1	33	0.741952	0.550582	1.3836	1.02902	0.19137	682.787	1650000	1700000
OX359197.1	34	0.63752	0.42705	1.50313	1.11792	0.21047	750.934	1700000	1750000
OX359197.1	35	0.861246	0.587978	1.51066	1.12352	0.273268	974.992	1750000	1800000
OX359197.1	36	0.812459	0.782727	1.13336	0.842912	0.0297328	106.084	1800000	1850000
OX359197.1	37	1.19918	1.08619	1.09931	0.817587	0.112987	403.125	1850000	1900000
OX359197.1	38	0.75448	0.550527	1.51445	1.12634	0.203953	727.681	1900000	1950000
OX359197.1	39	0.57728	0.469677	1.29199	0.960893	0.107603	383.917	1950000	2000000
OX359197.1	40	0.450141	0.354803	1.285	0.955693	0.0953379	340.156	2000000	2050000
OX359197.1	41	1.00987	0.92241	1.16264	0.864692	0.0874599	312.048	2050000	2100000
OX359197.1	42	0.982273	0.676907	1.4267	1.06108	0.305367	1089.52	2100000	2150000
OX359197.1	43	0.836586	0.848458	1.37415	1.022	-0.0118717	-42.3571	2150000	2200000
OX359197.1	44	0.834188	0.467137	1.86073	1.38388	0.367051	1309.6	2200000	2250000
OX359197.1	45	1.17537	1.03624	1.22728	0.912764	0.139126	496.386	2250000	2300000
OX359197.1	46	1.26663	1.11949	1.15534	0.859262	0.147142	524.986	2300000	2350000
OX359197.1	47	0.822783	1.02557	0.787391	0.585605	-0.202782	-723.506	2350000	2400000
OX359197.1	48	1.11019	1.13457	0.982826	0.730956	-0.0243865	-87.0084	2400000	2450000
OX359197.1	49	1.12128	1.02607	1.08927	0.810119	0.0952058	339.684	2450000	2500000
OX359197.1	50	1.14665	1.00153	1.20819	0.898567	0.145116	517.758	2500000	2550000
OX359197.1	51	1.11104	1.02062	1.17684	0.875251	0.0904188	322.605	2550000	2600000
OX359197.1	52	0.895727	0.919635	0.984297	0.73205	-0.0239084	-85.3026	2600000	2650000
OX359197.1	53	1.13293	1.15047	0.977314	0.726857	-0.0175471	-62.6061	2650000	2700000
OX359197.1	54	1.42502	1.48466	0.960633	0.71445	-0.0596385	-212.784	2700000	2750000
OX359197.1	55	1.52304	1.53397	0.997288	0.741712	-0.0109232	-38.9728	2750000	2800000
OX359197.1	56	0.859845	0.998842	0.835804	0.621611	-0.138998	-495.929	2800000	2850000
OX359197.1	57	0.403059	0.624283	0.639032	0.475267	-0.221225	-789.306	2850000	2900000
OX359197.1	58	0.51893	0.703671	0.738331	0.549118	-0.18474	-659.134	2900000	2950000
OX359197.1	59	0.535352	0.801757	0.693289	0.515619	-0.266405	-950.507	2950000	3000000
OX359197.1	60	0.485463	0.732074	0.660744	0.491414	-0.246611	-879.883	3000000	3050000
OX359197.1	61	0.49695	0.557848	0.973794	0.724239	-0.0608978	-217.277	3050000	3100000
OX359197.1	62	0.456039	0.361856	1.254	0.932633	0.0941837	336.038	3100000	3150000
OX359197.1	63	0.502564	0.408121	1.23237	0.916551	0.0944428	336.962	3150000	3200000
OX359197.1	64	0.500829	0.580399	0.920218	0.684392	-0.0795693	-283.895	3200000	3250000
OX359197.1	65	0.525808	0.63664	0.838969	0.623965	-0.110832	-395.438	3250000	3300000
OX359197.1	66	0.530991	0.584098	0.890264	0.662115	-0.0531076	-189.483	3300000	3350000
OX359197.1	67	0.294103	0.522712	0.578188	0.430015	-0.228609	-815.653	3350000	3400000
OX359197.1	68	0.534704	0.558254	0.86329	0.642054	-0.0235499	-84.0237	3400000	3450000
OX359197.1	69	0.69589	0.731472	0.990953	0.737	-0.0355825	-126.955	3450000	3500000
OX359197.1	70	0.582751	0.364554	1.61981	1.2047	0.218197	778.503	3500000	3550000
OX359197.1	71	0.450538	0.28556	1.57804	1.17363	0.164978	588.624	3550000	3600000
OX359197.1	72	0.513948	0.301289	1.81645	1.35094	0.212659	758.747	3600000	3650000
OX359197.1	73	0.239434	0.251714	1.2499	0.929584	-0.0122807	-43.8163	3650000	3700000
OX359197.1	74	0.734727	0.476492	1.91759	1.42617	0.258235	921.356	3700000	3750000
OX359197.1	75	0.241332	0.366295	0.670589	0.498736	-0.124964	-445.857	3750000	3800000
OX359197.1	76	0.610768	0.570276	1.08201	0.804721	0.0404918	144.471	3800000	3850000
OX359197.1	77	0.630678	0.473197	1.52915	1.13727	0.157481	561.876	3850000	3900000
OX359197.1	78	0.650764	0.386239	1.68908	1.25622	0.264524	943.796	3900000	3950000
OX359197.1	79	0.849018	0.805803	1.07903	0.802509	0.0432148	154.186	3950000	4000000
OX359197.1	80	0.313606	0.366288	0.997434	0.741821	-0.0526829	-187.967	4000000	4050000
OX359197.1	81	0.766036	0.820775	0.904834	0.672951	-0.0547391	-195.303	4050000	4100000
OX359197.1	82	0.642219	0.758815	0.879131	0.653835	-0.116597	-416.005	4100000	4150000
OX359197.1	83	0.682112	0.767274	1.01514	0.754987	-0.0851624	-303.851	4150000	4200000
OX359197.1	84	0.870293	1.08468	0.828026	0.615826	-0.214392	-764.927	4200000	4250000
OX359197.1	85	0.77608	1.09605	0.757408	0.563306	-0.31997	-1141.62	4250000	4300000
OX359197.1	86	0.770173	0.643836	1.15328	0.857727	0.126337	450.756	4300000	4350000
OX359197.1	87	1.09488	1.04797	1.0653	0.792293	0.046903	167.345	4350000	4400000
OX359197.1	88	1.13042	1.32813	0.854355	0.635408	-0.197711	-705.414	4400000	4450000
OX359197.1	89	1.29056	1.42467	0.905647	0.673555	-0.134101	-478.459	4450000	4500000
OX359197.1	90	1.32003	1.5741	0.844458	0.628048	-0.254076	-906.517	4500000	4550000
OX359197.1	91	1.96503	2.05236	0.946694	0.704084	-0.0873228	-311.559	4550000	4600000
OX359197.1	92	2.61035	2.78204	0.952307	0.708258	-0.171688	-612.567	4600000	4650000
OX359197.1	93	1.56392	1.4533	1.04877	0.780003	0.110614	394.659	4650000	4700000
OX359197.1	94	0.798721	1.16698	0.640072	0.47604	-0.368256	-1313.9	4700000	4750000
OX359197.1	95	0.65314	1.02857	0.614021	0.456665	-0.375425	-1339.48	4750000	4800000
OX359197.1	96	0.827092	1.12767	0.709674	0.527805	-0.300573	-1072.41	4800000	4850000
OX359197.1	97	0.794328	0.841316	0.930442	0.691996	-0.046988	-167.648	4850000	4900000
OX359197.1	98	0.916236	0.812924	4.94676	3.67904	0.103313	368.608	4900000	4950000
OX359197.1	99	0.853641	0.519102	17.921	13.3283	0.334539	1193.6	4950000	5000000
OX359197.1	100	0.536932	0.486975	1.1242	0.836097	0.0499565	178.24	5000000	5050000
OX359197.1	101	0.427665	0.453016	0.921402	0.685273	-0.0253505	-90.4478	5050000	5100000
OX359197.1	102	1.20082	1.10081	1.06903	0.795066	0.100005	356.808	5100000	5150000
OX359197.1	103	0.686906	0.636725	1.08801	0.809181	0.0501809	179.04	5150000	5200000
OX359197.1	104	0.385016	0.363398	1.32828	0.987883	0.0216184	77.1323	5200000	5250000
OX359197.1	105	0.183228	0.160394	1.77547	1.32047	0.0228339	81.4691	5250000	5300000
OX359197.1	106	0.881672	0.735257	1.26541	0.941121	0.146415	522.393	5300000	5350000
OX359197.1	107	0.827032	0.479385	1.89594	1.41006	0.347647	1240.37	5350000	5400000
OX359197.1	108	0.535911	0.35549	2.00307	1.48974	0.180421	643.724	5400000	5450000
OX359197.1	109	0.0950831	0.0359485	3.76606	2.80093	0.0591346	210.986	5450000	5500000
OX359197.1	110	0.798952	0.89693	0.966666	0.718937	-0.0979784	-349.577	5500000	5550000
OX359197.1	111	0.578212	0.800916	0.717554	0.533666	-0.222704	-794.584	5550000	5600000
OX359197.1	112	0.665152	0.675302	1.08969	0.810434	-0.01015	-36.214	5600000	5650000
OX359197.1	113	0.948334	0.760818	1.38951	1.03342	0.187516	669.037	5650000	5700000
OX359197.1	114	1.10691	1.20037	0.89118	0.662796	-0.0934544	-333.436	5700000	5750000
OX359197.1	115	1.08218	1.0306	1.08531	0.807177	0.0515812	184.036	5750000	5800000
OX359197.1	116	0.699912	0.549568	1.31788	0.980144	0.150344	536.412	5800000	5850000
OX359197.1	117	1.24289	0.965807	1.31036	0.974555	0.27708	988.592	5850000	5900000
OX359197.1	118	1.42735	1.25365	1.14177	0.849166	0.173701	619.747	5900000	5950000
OX359197.1	119	1.31093	1.30172	1.04852	0.779812	0.00920467	32.8413	5950000	6000000
OX359197.1	120	0.971304	1.00448	0.972675	0.723406	-0.033173	-118.358	6000000	6050000
OX359197.1	121	0.8524	0.886215	0.989197	0.735694	-0.033815	-120.649	6050000	6100000
OX359197.1	122	1.54145	1.33209	1.15954	0.862385	0.209359	746.97	6100000	6150000
OX359197.1	123	0.569992	0.421807	1.65871	1.23363	0.148185	528.709	6150000	6200000
OX359197.1	124	0.630268	0.553933	2.73381	2.03321	0.076335	272.355	6200000	6250000
OX359197.1	125	0.983728	0.942441	1.03872	0.772529	0.0412864	147.306	6250000	6300000
OX359197.1	126	1.0566	1.06077	0.990039	0.73632	-0.00417493	-14.8957	6300000	6350000
OX359197.1	127	1.13174	1.09827	1.04388	0.776367	0.033472	119.425	6350000	6400000
OX359197.1	128	0.949246	0.827948	1.1782	0.876264	0.121298	432.779	6400000	6450000
OX359197.1	129	0.715904	0.782167	0.974507	0.724769	-0.0662632	-236.42	6450000	6500000
OX359197.1	130	0.750261	0.94666	0.853893	0.635065	-0.196399	-700.731	6500000	6550000
OX359197.1	131	1.6435	1.51646	1.11277	0.827597	0.127047	453.289	6550000	6600000
OX359197.1	132	0.97778	0.788451	1.39232	1.03551	0.189329	675.507	6600000	6650000
OX359197.1	133	1.23695	1.01855	1.40913	1.04801	0.218401	779.232	6650000	6700000
OX359197.1	134	0.768251	0.648782	1.2429	0.92438	0.119469	426.252	6700000	6750000
OX359197.1	135	0.960226	0.717818	1.67429	1.24522	0.242408	864.886	6750000	6800000
OX359197.1	136	1.51315	1.52132	1.0246	0.762022	-0.00816885	-29.1456	6800000	6850000
OX359197.1	137	1.14191	1.25942	0.896931	0.667074	-0.117515	-419.282	6850000	6900000
OX359197.1	138	1.1716	1.41356	0.828537	0.616207	-0.241965	-863.307	6900000	6950000
OX359197.1	139	1.04319	0.721136	4.92724	3.66453	0.322054	1149.05	6950000	7000000
OX359197.1	140	1.11318	0.82588	3.09491	2.30178	0.287303	1025.07	7000000	7050000
OX359197.1	141	1.41389	0.968545	1.55298	1.15499	0.445347	1588.95	7050000	7100000
OX359197.1	142	1.29866	1.03346	2.179	1.62059	0.2652	946.205	7100000	7150000
OX359197.1	143	0.808315	0.70697	2.04062	1.51767	0.101345	361.589	7150000	7200000
OX359197.1	144	0.428484	0.593184	3.39331	2.5237	-0.1647	-587.634	7200000	7250000
OX359197.1	145	0.304588	0.135491	5.96351	4.43523	0.169098	603.323	7250000	7300000
OX359197.1	146	0.783733	0.531739	2.74208	2.03937	0.251994	899.087	7300000	7350000
OX359197.1	147	1.09293	0.888092	1.80717	1.34404	0.204839	730.846	7350000	7400000
OX359197.1	148	1.2852	1.08945	1.20565	0.896679	0.19575	698.417	7400000	7450000
OX359197.1	149	0.919861	0.825121	1.28463	0.955419	0.0947396	338.021	7450000	7500000
OX359197.1	150	1.13106	1.03878	1.12602	0.837452	0.0922769	329.234	7500000	7550000
OX359197.1	151	1.14398	1.32992	0.845923	0.629137	-0.185942	-663.421	7550000	7600000
OX359197.1	152	1.30917	1.13519	1.17609	0.874694	0.173981	620.748	7600000	7650000
OX359197.1	153	1.73381	1.69398	1.02406	0.761624	0.0398256	142.094	7650000	7700000
OX359198.1	0	1.15089	1.27732	0.850704	0.632693	-0.126427	-451.08	0	50000
OX359198.1	1	0.548828	0.700053	0.650321	0.483662	-0.151225	-539.556	50000	100000
OX359198.1	2	0.115741	0.212588	0.283704	0.210999	-0.0968463	-345.538	100000	150000
OX359198.1	3	0.781251	1.00771	0.716109	0.532591	-0.226462	-807.992	150000	200000
OX359198.1	4	0.855745	0.711459	1.20105	0.893253	0.144286	514.798	200000	250000
OX359198.1	5	0.758316	0.551437	1.52157	1.13163	0.206879	738.122	250000	300000
OX359198.1	6	1.07008	0.888367	1.27606	0.949044	0.18171	648.323	300000	350000
OX359198.1	7	0.588322	0.405194	1.45871	1.08488	0.183127	653.379	350000	400000
OX359198.1	8	0.698261	0.566584	1.23825	0.920921	0.131676	469.808	400000	450000
OX359198.1	9	0.852391	0.741944	1.01215	0.752762	0.110447	394.062	450000	500000
OX359198.1	10	0.798037	0.81129	0.984589	0.732267	-0.0132531	-47.2858	500000	550000
OX359198.1	11	0.624712	0.967576	0.595495	0.442887	-0.342864	-1223.3	550000	600000
OX359198.1	12	0.373146	0.421358	0.95997	0.713957	-0.0482117	-172.014	600000	650000
OX359198.1	13	0.3759	0.31582	1.22993	0.914731	0.0600802	214.36	650000	700000
OX359198.1	14	0.854095	0.941592	0.909752	0.676609	-0.087497	-312.18	700000	750000
OX359198.1	15	0.66042	0.565543	1.21643	0.904696	0.0948773	338.512	750000	800000
OX359198.1	16	0.843321	0.703848	1.29651	0.964254	0.139472	497.622	800000	850000
OX359198.1	17	0.507097	0.303457	1.79776	1.33705	0.20364	726.566	850000	900000
OX359198.1	18	0.498976	0.375224	1.8412	1.36935	0.123752	441.534	900000	950000
OX359198.1	19	0.542509	0.525701	1.03713	0.771343	0.0168081	59.9697	950000	1000000
OX359198.1	20	0.592251	0.589731	1.05546	0.784977	0.00252009	8.99141	1000000	1050000
OX359198.1	21	0.530978	0.448697	4.93267	3.66857	0.0822806	293.569	1050000	1100000
OX359198.1	22	0.174873	0.165225	9.29695	6.91441	0.00964739	34.4209	1100000	1150000
OX359198.1	23	0.326628	0.274267	1.57989	1.17501	0.0523615	186.821	1150000	1200000
OX359198.1	24	0.984023	0.941932	1.08658	0.808121	0.0420901	150.173	1200000	1250000
OX359198.1	25	0.640293	0.607431	1.10519	0.821965	0.0328618	117.248	1250000	1300000
OX359198.1	26	0.34704	0.223535	1.40159	1.04241	0.123505	440.653	1300000	1350000
OX359198.1	27	0.436137	0.207064	2.28802	1.70167	0.229072	817.307	1350000	1400000
OX359198.1	28	0.238965	0.173078	1.064	0.791328	0.0658867	235.077	1400000	1450000
OX359198.1	29	0.257302	0.1257	2.17923	1.62075	0.131602	469.542	1450000	1500000
OX359198.1	30	0.181436	0.0944784	2.08934	1.5539	0.0869578	310.256	1500000	1550000
OX359198.1	31	0.69029	0.76315	0.881714	0.655756	-0.0728606	-259.959	1550000	1600000
OX359198.1	32	0.664431	0.662048	0.984689	0.732342	0.00238308	8.50259	1600000	1650000
OX359198.1	33	1.09061	1.0006	1.13419	0.843528	0.0900149	321.164	1650000	1700000
OX359198.1	34	0.457755	0.789354	0.597485	0.444367	-0.331599	-1183.11	1700000	1750000
OX359198.1	35	0.206265	0.333766	0.633884	0.471438	-0.127501	-454.911	1750000	1800000
OX359198.1	36	0.294893	0.384064	0.744059	0.553378	-0.0891711	-318.153	1800000	1850000
OX359198.1	37	0.752491	0.808566	0.94489	0.702742	-0.0560749	-200.07	1850000	1900000
OX359198.1	38	0.421916	0.201943	3.78379	2.81411	0.219972	784.838	1900000	1950000
OX359198.1	39	0.362655	0.382032	0.899514	0.668995	-0.0193765	-69.1335	1950000	2000000
OX359198.1	40	0.31737	0.289899	1.06286	0.790482	0.0274719	98.017	2000000	2050000
OX359198.1	41	0.477653	0.581587	1.11665	0.830488	-0.103934	-370.828	2050000	2100000
OX359198.1	42	0.775243	0.726423	1.07624	0.800431	0.0488199	174.184	2100000	2150000
OX359198.1	43	1.00716	0.903864	1.12412	0.836037	0.1033	368.562	2150000	2200000
OX359198.1	44	1.27253	0.996622	1.28664	0.95691	0.275909	984.413	2200000	2250000
OX359198.1	45	0.931146	0.860543	1.15618	0.859883	0.0706032	251.905	2250000	2300000
OX359198.1	46	0.25367	0.40515	0.622417	0.462909	-0.151479	-540.463	2300000	2350000
OX359198.1	47	0.104667	0.331855	0.298081	0.221691	-0.227188	-810.583	2350000	2400000
OX359198.1	48	0.080798	0.298866	0.271534	0.201948	-0.218068	-778.046	2400000	2450000
OX359198.1	49	0.215916	0.416134	0.489851	0.364316	-0.200218	-714.357	2450000	2500000
OX359198.1	50	0.131989	0.378189	0.31868	0.237011	-0.2462	-878.417	2500000	2550000
OX359198.1	51	0.313375	0.489713	0.57652	0.428775	-0.176337	-629.153	2550000	2600000
OX359198.1	52	1.11644	1.13791	0.978384	0.727652	-0.021473	-76.6135	2600000	2650000
OX359198.1	53	1.97318	1.71276	1.16003	0.862747	0.260422	929.16	2650000	2700000
OX359198.1	54	1.88055	1.86508	1.01152	0.752298	0.0154716	55.201	2700000	2750000
OX359198.1	55	1.87272	1.78875	1.05237	0.782675	0.0839726	299.605	2750000	2800000
OX359198.1	56	1.71198	1.60962	1.06869	0.794817	0.102362	365.218	2800000	2850000
OX359198.1	57	1.46232	1.3455	1.09298	0.812884	0.116816	416.788	2850000	2900000
OX359198.1	58	1.52115	1.46428	1.03908	0.772791	0.0568657	202.891	2900000	2950000
OX359198.1	59	1.27382	1.23162	1.03224	0.767703	0.0422023	150.573	2950000	3000000
OX359198.1	60	1.39468	1.30612	1.0721	0.797351	0.0885592	315.97	3000000	3050000
OX359198.1	61	1.40784	1.3008	1.08708	0.80849	0.107035	381.891	3050000	3100000
OX359198.1	62	0.551881	0.516796	1.12594	0.837392	0.0350859	125.183	3100000	3150000
OX359198.1	63	0.84205	0.733303	1.16091	0.8634	0.108747	387.999	3150000	3200000
OX359198.1	64	1.08639	1.03754	1.05405	0.783928	0.0488484	174.286	3200000	3250000
OX359198.1	65	0.879701	0.81234	1.09784	0.816498	0.0673612	240.338	3250000	3300000
OX359198.1	66	0.802765	0.733309	1.10214	0.819696	0.0694563	247.813	3300000	3350000
OX359198.1	67	1.73827	1.66043	1.05209	0.782473	0.0778428	277.735	3350000	3400000
OX359198.1	68	1.45771	1.39677	1.04586	0.777837	0.0609471	217.453	3400000	3450000
OX359198.1	69	1.29746	1.24583	1.04205	0.774999	0.0516353	184.229	3450000	3500000
OX359198.1	70	1.44206	1.31852	1.09069	0.811179	0.123538	440.772	3500000	3550000
OX359198.1	71	1.35934	1.33328	1.01721	0.756529	0.0260601	92.9797	3550000	3600000
OX359198.1	72	1.13705	1.17997	0.988317	0.735039	-0.0429199	-153.134	3600000	3650000
OX359198.1	73	0.691888	0.613821	1.12467	0.836448	0.0780672	278.536	3650000	3700000
OX359198.1	74	1.34088	1.25142	1.08641	0.807994	0.0894631	319.195	3700000	3750000
OX359198.1	75	1.63897	1.54199	1.06479	0.791919	0.0969795	346.013	3750000	3800000
OX359198.1	76	1.35113	1.30255	1.04217	0.775091	0.0485851	173.347	3800000	3850000
OX359198.1	77	1.36664	1.27867	1.06546	0.792416	0.0879692	313.865	3850000	3900000
OX359198.1	78	1.73883	1.59477	1.09698	0.815857	0.144061	513.994	3900000	3950000
OX359198.1	79	1.67741	1.52178	1.10506	0.821864	0.155626	555.258	3950000	4000000
OX359198.1	80	2.01185	1.92406	1.04082	0.774091	0.0877895	313.224	4000000	4050000
OX359198.1	81	2.04915	2.07611	0.987357	0.734326	-0.0269572	-96.1805	4050000	4100000
OX359198.1	82	1.88258	1.89206	0.994682	0.739773	-0.00947585	-33.8088	4100000	4150000
OX359198.1	83	1.79448	1.82875	0.991911	0.737713	-0.0342636	-122.249	4150000	4200000
OX359198.1	84	1.19484	1.36362	0.830774	0.61787	-0.168776	-602.177	4200000	4250000
OX359198.1	85	0.931488	1.33838	0.691641	0.514393	-0.406894	-1451.76	4250000	4300000
OX359198.1	86	0.715153	1.20234	0.588978	0.43804	-0.487189	-1738.24	4300000	4350000
OX359198.1	87	1.03491	1.09736	0.944089	0.702146	-0.0624565	-222.838	4350000	4400000
OX359198.1	88	1.25457	1.37491	0.954784	0.7101	-0.120335	-429.343	4400000	4450000
OX359198.1	89	0.999716	0.910205	1.25341	0.932194	0.0895118	319.369	4450000	4500000
OX359198.1	90	0.930749	0.634819	1.58924	1.18196	0.295929	1055.85	4500000	4550000
OX359198.1	91	1.04954	1.01193	1.01636	0.7559	0.0376169	134.213	4550000	4600000
OX359198.1	92	1.56485	1.40276	1.11024	0.825721	0.16209	578.322	4600000	4650000
OX359198.1	93	0.817784	0.687384	1.67086	1.24267	0.1304	465.254	4650000	4700000
OX359198.1	94	0.444903	0.350499	1.56087	1.16087	0.0944038	336.823	4700000	4750000
OX359198.1	95	0.78606	0.794648	1.55595	1.1572	-0.00858859	-30.6432	4750000	4800000
OX359198.1	96	0.797803	1.0709	0.749855	0.557689	-0.273098	-974.384	4800000	4850000
OX359198.1	97	1.16077	1.04791	1.13267	0.842399	0.112853	402.649	4850000	4900000
OX359198.1	98	0.723803	0.785806	0.891259	0.662855	-0.0620026	-221.219	4900000	4950000
OX359198.1	99	0.756193	1.00066	0.836	0.621757	-0.244464	-872.223	4950000	5000000
OX359198.1	100	1.03785	0.74811	1.39399	1.03675	0.289741	1033.77	5000000	5050000
OX359198.1	101	0.606728	0.622263	1.12017	0.833103	-0.0155344	-55.4251	5050000	5100000
OX359198.1	102	1.31317	1.02668	1.38115	1.0272	0.286491	1022.17	5100000	5150000
OX359198.1	103	1.18062	1.02388	1.18406	0.88062	0.156734	559.21	5150000	5200000
OX359198.1	104	1.20634	0.99101	1.24808	0.928235	0.215329	768.27	5200000	5250000
OX359198.1	105	1.12515	1.11299	1.09485	0.814274	0.0121634	43.3979	5250000	5300000
OX359198.1	106	1.01629	1.25903	0.837015	0.622512	-0.242741	-866.076	5300000	5350000
OX359198.1	107	0.537932	0.558269	0.982647	0.730823	-0.0203374	-72.5619	5350000	5400000
OX359198.1	108	0.933951	0.917093	1.01016	0.751287	0.0168589	60.1507	5400000	5450000
OX359198.1	109	1.2369	1.34446	0.926249	0.688878	-0.107565	-383.779	5450000	5500000
OX359198.1	110	1.13503	0.979479	1.1789	0.876784	0.155547	554.976	5500000	5550000
OX359198.1	111	1.28399	1.0693	1.30181	0.968197	0.21469	765.993	5550000	5600000
OX359198.1	112	0.567887	0.528784	1.20984	0.899792	0.0391032	139.516	5600000	5650000
OX359198.1	113	0.220041	0.334935	0.783235	0.582514	-0.114894	-409.928	5650000	5700000
OX359198.1	114	1.22693	1.13646	1.05606	0.785421	0.0904643	322.767	5700000	5750000
OX359198.1	115	1.3352	1.51841	0.878147	0.653103	-0.183206	-653.66	5750000	5800000
OX359198.1	116	0.628746	1.07714	0.547329	0.407064	-0.448391	-1599.81	5800000	5850000
OX359198.1	117	1.00836	1.18754	0.853617	0.63486	-0.179177	-639.284	5850000	5900000
OX359198.1	118	1.27819	1.23762	1.0494	0.780468	0.0405728	144.76	5900000	5950000
OX359198.1	119	1.41403	1.41223	1.00737	0.749209	0.00179736	6.4128	5950000	6000000
OX359198.1	120	0.55813	0.614727	1.31146	0.975373	-0.0565971	-201.932	6000000	6050000
OX359198.1	121	1.20731	1.32782	0.907837	0.675184	-0.120506	-429.953	6050000	6100000
OX359198.1	122	0.982258	1.01015	0.997327	0.741741	-0.0278885	-99.5033	6100000	6150000
OX359198.1	123	1.93829	1.83218	1.06658	0.793243	0.106109	378.588	6150000	6200000
OX359198.1	124	1.66659	1.8143	0.928376	0.69046	-0.147706	-527.001	6200000	6250000
OX359198.1	125	1.74198	1.73423	1.02729	0.764027	0.0077499	27.6508	6250000	6300000
OX359198.1	126	1.40673	1.53601	0.940843	0.699732	-0.129277	-461.246	6300000	6350000
OX359198.1	127	1.27295	1.34724	0.965706	0.718223	-0.0742891	-265.056	6350000	6400000
OX359198.1	128	1.51365	1.30055	1.15148	0.856387	0.213095	760.302	6400000	6450000
OX359198.1	129	1.47438	1.51602	0.986698	0.733835	-0.0416381	-148.56	6450000	6500000
OX359198.1	130	0.78048	0.673876	1.22782	0.913162	0.106604	380.352	6500000	6550000
OX359198.1	131	0.943763	0.873301	1.00717	0.749061	0.0704612	251.398	6550000	6600000
OX359198.1	132	1.11848	1.1236	0.971044	0.722193	-0.00511771	-18.2595	6600000	6650000
OX359198.1	133	1.28593	1.32479	0.960565	0.714399	-0.0388623	-138.657	6650000	6700000
OX359198.1	134	1.26118	1.22545	1.04816	0.779544	0.0357317	127.487	6700000	6750000
OX359198.1	135	0.749862	0.885083	0.675665	0.502511	-0.135221	-482.453	6750000	6800000
OX359198.1	136	1.29882	1.71469	0.743058	0.552634	-0.415877	-1483.81	6800000	6850000
OX359198.1	137	1.63924	1.45831	1.12887	0.839577	0.180926	645.526	6850000	6900000
OX359198.1	138	0.861655	0.743861	16.4233	12.2144	0.117794	420.278	6900000	6950000
OX359198.1	139	1.16626	1.06659	1.74042	1.2944	0.0996708	355.615	6950000	7000000
OX359198.1	140	0.926576	1.0772	0.830988	0.618029	-0.150628	-537.426	7000000	7050000
OX359198.1	141	1.06817	1.00947	1.02923	0.765471	0.0587002	209.436	7050000	7100000
OX359198.1	142	1.21034	1.25385	0.948169	0.70518	-0.0435076	-155.231	7100000	7150000
OX359198.1	143	1.0802	1.22414	0.874517	0.650403	-0.143937	-513.553	7150000	7200000
OX359198.1	144	0.992082	1.07603	0.905599	0.67352	-0.0839453	-299.508	7200000	7250000
OX359198.1	145	1.34866	1.37677	1.00404	0.746735	-0.0281072	-100.284	7250000	7300000
OX359198.1	146	1.14732	1.27478	0.895709	0.666164	-0.127458	-454.758	7300000	7350000
OX359198.1	147	1.39146	1.41035	0.978976	0.728093	-0.0188937	-67.4108	7350000	7400000
OX359198.1	148	1.12101	0.985631	1.16851	0.869051	0.135382	483.028	7400000	7450000
OX359198.1	149	1.20942	1.07026	1.1865	0.882432	0.139159	496.507	7450000	7500000
OX359198.1	150	1.58086	1.37937	1.31784	0.980119	0.201493	718.906	7500000	7550000
OX359198.1	151	1.33721	1.19936	1.45017	1.07853	0.137847	491.824	7550000	7600000
OX359198.1	152	0.742739	0.559883	1.52318	1.13283	0.182856	652.411	7600000	7650000
OX359198.1	153	0.202814	0.116217	1.74513	1.2979	0.0865968	308.968	7650000	7655000
OX359199.1	0	1.51945	1.5798	1.08387	0.806106	-0.0603508	-215.325	0	50000
OX359199.1	1	1.33859	1.11494	1.28827	0.958125	0.223647	797.95	50000	100000
OX359199.1	2	0.923978	0.821469	1.31189	0.97569	0.10251	365.744	100000	150000
OX359199.1	3	0.97799	0.777869	1.3271	0.987006	0.200121	714.01	150000	200000
OX359199.1	4	0.605737	0.591164	1.19112	0.885871	0.0145721	51.9919	200000	250000
OX359199.1	5	0.349772	0.275586	1.48326	1.10314	0.0741853	264.685	250000	300000
OX359199.1	6	0.739175	0.69192	1.03821	0.772148	0.0472551	168.601	300000	350000
OX359199.1	7	0.97909	0.612731	1.94393	1.44575	0.366359	1307.13	350000	400000
OX359199.1	8	0.743004	0.791154	1.07899	0.802473	-0.0481502	-171.795	400000	450000
OX359199.1	9	0.76322	0.799985	0.951766	0.707856	-0.036765	-131.174	450000	500000
OX359199.1	10	0.947258	0.689955	1.38583	1.03068	0.257303	918.032	500000	550000
OX359199.1	11	0.776005	0.414405	2.07326	1.54194	0.3616	1290.15	550000	600000
OX359199.1	12	0.564286	0.382226	1.64076	1.22028	0.182059	649.569	600000	650000
OX359199.1	13	0.634741	0.369917	3.43982	2.55829	0.264824	944.864	650000	700000
OX359199.1	14	0.325176	0.118113	21.4964	15.9875	0.207063	738.778	700000	750000
OX359199.1	15	0.47217	0.320535	1.57352	1.17027	0.151634	541.015	750000	800000
OX359199.1	16	0.817294	0.512178	2.52337	1.8767	0.305116	1088.62	800000	850000
OX359199.1	17	0.645163	0.627594	1.24917	0.929045	0.0175689	62.684	850000	900000
OX359199.1	18	0.775681	0.74219	1.05868	0.787374	0.0334904	119.49	900000	950000
OX359199.1	19	0.783836	0.832417	0.922445	0.686049	-0.0485811	-173.332	950000	1000000
OX359199.1	20	0.813727	1.00902	0.856246	0.636815	-0.19529	-696.775	1000000	1050000
OX359199.1	21	0.57553	0.552342	1.02842	0.764864	0.0231877	82.7313	1050000	1100000
OX359199.1	22	0.874843	0.773205	1.19964	0.892208	0.101639	362.637	1100000	1150000
OX359199.1	23	0.566481	0.504599	1.33268	0.99115	0.0618817	220.787	1150000	1200000
OX359199.1	24	0.784003	0.643826	1.23472	0.918294	0.140176	500.135	1200000	1250000
OX359199.1	25	0.739752	0.580873	1.40465	1.04468	0.158879	566.865	1250000	1300000
OX359199.1	26	0.551913	0.359079	3.15133	2.34373	0.192834	688.01	1300000	1350000
OX359199.1	27	0.144298	0.16174	1.22482	0.910931	-0.0174422	-62.2321	1350000	1400000
OX359199.1	28	0.279835	0.124836	4.80679	3.57495	0.154999	553.02	1400000	1450000
OX359199.1	29	0.575764	0.598647	1.50922	1.12245	-0.022883	-81.6442	1450000	1500000
OX359199.1	30	0.352005	0.281743	1.46237	1.0876	0.0702614	250.686	1500000	1550000
OX359199.1	31	0.288293	0.45193	0.760711	0.565763	-0.163637	-583.839	1550000	1600000
OX359199.1	32	1.05058	1.02886	1.04151	0.774599	0.0217115	77.4645	1600000	1650000
OX359199.1	33	0.50111	0.615987	0.834298	0.620491	-0.114876	-409.867	1650000	1700000
OX359199.1	34	1.02521	1.15893	0.893153	0.664263	-0.133718	-477.092	1700000	1750000
OX359199.1	35	0.744185	0.744347	1.24165	0.923452	-0.000162202	-0.578721	1750000	1800000
OX359199.1	36	0.689901	1.10433	0.605946	0.45066	-0.414431	-1478.65	1800000	1850000
OX359199.1	37	0.950064	0.799668	1.28402	0.95496	0.150396	536.596	1850000	1900000
OX359199.1	38	0.741682	1.05254	0.955289	0.710476	-0.310863	-1109.13	1900000	1950000
OX359199.1	39	1.30101	1.28316	1.01226	0.75285	0.0178548	63.7042	1950000	2000000
OX359199.1	40	0.748325	0.663258	1.12685	0.838068	0.0850671	303.51	2000000	2050000
OX359199.1	41	0.588643	0.658541	0.952462	0.708373	-0.0698979	-249.388	2050000	2100000
OX359199.1	42	0.851117	0.99808	0.918077	0.6828	-0.146963	-524.35	2100000	2150000
OX359199.1	43	0.10862	0.266947	0.376574	0.280069	-0.158327	-564.894	2150000	2200000
OX359199.1	44	0.0561792	0.276286	0.205244	0.152646	-0.220107	-785.32	2200000	2250000
OX359199.1	45	0.38611	0.505725	0.587335	0.436818	-0.119615	-426.773	2250000	2300000
OX359199.1	46	1.10195	1.34419	0.87484	0.650643	-0.242243	-864.297	2300000	2350000
OX359199.1	47	1.02842	0.970763	1.10003	0.818122	0.057661	205.729	2350000	2400000
OX359199.1	48	1.06243	0.742719	1.5845	1.17844	0.31971	1140.69	2400000	2450000
OX359199.1	49	1.1323	0.96389	1.22777	0.913131	0.168405	600.853	2450000	2500000
OX359199.1	50	0.946327	1.04106	1.01357	0.753818	-0.0947354	-338.006	2500000	2550000
OX359199.1	51	1.56187	1.87157	0.863425	0.642154	-0.309699	-1104.97	2550000	2600000
OX359199.1	52	1.34901	1.89615	0.710078	0.528105	-0.547142	-1952.15	2600000	2650000
OX359199.1	53	1.12173	1.75263	0.634476	0.471878	-0.630899	-2250.98	2650000	2700000
OX359199.1	54	0.991597	1.65185	0.598504	0.445124	-0.660256	-2355.73	2700000	2750000
OX359199.1	55	0.707433	1.11619	0.614956	0.45736	-0.40876	-1458.41	2750000	2800000
OX359199.1	56	0.75696	1.23167	0.609754	0.453491	-0.474712	-1693.72	2800000	2850000
OX359199.1	57	0.596245	1.17857	0.512496	0.381158	-0.582325	-2077.68	2850000	2900000
OX359199.1	58	0.6359	1.17341	0.533729	0.39695	-0.537514	-1917.79	2900000	2950000
OX359199.1	59	0.588402	1.19623	0.490292	0.364645	-0.607831	-2168.68	2950000	3000000
OX359199.1	60	0.606008	1.17591	0.515504	0.383395	-0.569905	-2033.36	3000000	3050000
OX359199.1	61	0.60938	1.18971	0.514489	0.38264	-0.580334	-2070.57	3050000	3100000
OX359199.1	62	0.613332	1.17223	0.520515	0.387122	-0.558895	-1994.08	3100000	3150000
OX359199.1	63	0.442044	0.918361	0.473357	0.352049	-0.476317	-1699.45	3150000	3200000
OX359199.1	64	0.400656	0.710173	0.58423	0.434508	-0.309517	-1104.32	3200000	3250000
OX359199.1	65	0.3611	0.774928	0.473171	0.351911	-0.413827	-1476.49	3250000	3300000
OX359199.1	66	0.487869	0.997281	0.483445	0.359552	-0.509413	-1817.53	3300000	3350000
OX359199.1	67	0.688458	1.31895	0.525855	0.391094	-0.630496	-2249.55	3350000	3400000
OX359199.1	68	0.941796	1.33832	0.691553	0.514328	-0.396528	-1414.77	3400000	3450000
OX359199.1	69	0.723786	1.30201	0.552185	0.410676	-0.578221	-2063.03	3450000	3500000
OX359199.1	70	0.910058	1.61037	0.551765	0.410363	-0.700316	-2498.66	3500000	3550000
OX359199.1	71	0.943281	1.47558	0.617151	0.458993	-0.532296	-1899.18	3550000	3600000
OX359199.1	72	0.715112	1.47008	0.485868	0.361354	-0.754966	-2693.64	3600000	3650000
OX359199.1	73	1.11273	1.54416	0.7174	0.533551	-0.431432	-1539.31	3650000	3700000
OX359199.1	74	0.639225	1.01732	0.732611	0.544864	-0.37809	-1348.99	3700000	3750000
OX359199.1	75	1.13399	1.72543	0.652412	0.485218	-0.591441	-2110.2	3750000	3800000
OX359199.1	76	1.38917	2.05085	0.678872	0.504896	-0.661681	-2360.81	3800000	3850000
OX359199.1	77	1.32107	1.88079	0.71603	0.532532	-0.559719	-1997.02	3850000	3900000
OX359199.1	78	1.54288	1.6186	0.942653	0.701078	-0.075724	-270.176	3900000	3950000
OX359199.1	79	0.631256	0.473396	4.74287	3.52741	0.157861	563.231	3950000	4000000
OX359199.1	80	0.835466	0.639334	1.48109	1.10153	0.196133	699.782	4000000	4050000
OX359199.1	81	0.933922	0.921559	1.08836	0.809442	0.0123629	44.1095	4050000	4100000
OX359199.1	82	1.58327	1.64148	0.967157	0.719303	-0.0582111	-207.691	4100000	4150000
OX359199.1	83	1.1177	1.17617	0.960927	0.714669	-0.058471	-208.619	4150000	4200000
OX359199.1	84	1.26497	1.40958	0.906888	0.674478	-0.144612	-515.96	4200000	4250000
OX359199.1	85	0.807272	0.936096	0.85419	0.635286	-0.128824	-459.631	4250000	4300000
OX359199.1	86	1.63305	1.59635	1.03247	0.767879	0.0367007	130.944	4300000	4350000
OX359199.1	87	1.62554	1.69369	0.971243	0.722342	-0.0681477	-243.144	4350000	4400000
OX359199.1	88	0.76812	0.879135	0.879364	0.654008	-0.111015	-396.089	4400000	4450000
OX359199.1	89	1.45381	1.37119	1.0508	0.781509	0.0826213	294.784	4450000	4500000
OX359199.1	90	1.33668	1.28357	1.06776	0.794126	0.0531093	189.488	4500000	4550000
OX359199.1	91	1.68543	1.49106	1.12997	0.840394	0.194375	693.511	4550000	4600000
OX359199.1	92	1.59191	1.54875	1.02922	0.765464	0.0431586	153.986	4600000	4650000
OX359199.1	93	1.11308	0.938865	1.24971	0.929443	0.174211	621.568	4650000	4700000
OX359199.1	94	0.853189	0.796232	1.09483	0.814258	0.0569571	203.217	4700000	4750000
OX359199.1	95	1.33299	1.20339	1.13479	0.843977	0.129597	462.388	4750000	4800000
OX359199.1	96	0.89404	0.924703	0.981494	0.729966	-0.0306629	-109.402	4800000	4850000
OX359199.1	97	1.15004	1.15696	1.06822	0.794469	-0.00691357	-24.6669	4850000	4900000
OX359199.1	98	0.815467	1.36621	0.617038	0.458909	-0.55074	-1964.99	4900000	4950000
OX359199.1	99	1.41559	1.30224	1.12948	0.840026	0.113359	404.454	4950000	5000000
OX359199.1	100	1.40008	1.48259	0.961286	0.714936	-0.0825086	-294.382	5000000	5050000
OX359199.1	101	0.840276	0.611355	2.08241	1.54874	0.228921	816.767	5050000	5100000
OX359199.1	102	1.21174	1.2271	1.0076	0.74938	-0.0153591	-54.7997	5100000	5150000
OX359199.1	103	1.43934	1.10004	1.33043	0.989479	0.339294	1210.57	5150000	5200000
OX359199.1	104	1.40245	1.26197	1.17064	0.87064	0.14048	501.217	5200000	5250000
OX359199.1	105	1.66002	1.35891	1.32273	0.983753	0.301113	1074.34	5250000	5300000
OX359199.1	106	1.09162	0.774275	6.84711	5.09239	0.317341	1132.24	5300000	5350000
OX359199.1	107	1.49859	1.34949	1.10555	0.822231	0.1491	531.973	5350000	5400000
OX359199.1	108	1.25735	1.00581	1.29796	0.965331	0.251539	897.465	5400000	5450000
OX359199.1	109	0.579566	0.238222	3.44397	2.56138	0.341344	1217.88	5450000	5500000
OX359199.1	110	0.836685	0.840725	1.19991	0.892404	-0.00403987	-14.4138	5500000	5550000
OX359199.1	111	1.27075	1.32356	1.01092	0.75185	-0.0528026	-188.394	5550000	5600000
OX359199.1	112	1.49053	1.57651	0.949008	0.705804	-0.0859753	-306.751	5600000	5650000
OX359199.1	113	0.708741	0.831849	0.880242	0.654661	-0.123108	-439.237	5650000	5700000
OX359199.1	114	0.816824	0.653632	1.72595	1.28364	0.163192	582.253	5700000	5750000
OX359199.1	115	0.965001	0.870257	1.91786	1.42637	0.0947447	338.039	5750000	5800000
OX359199.1	116	1.20156	0.867716	1.48933	1.10766	0.333842	1191.11	5800000	5850000
OX359199.1	117	0.749396	0.625248	1.38569	1.03058	0.124148	442.947	5850000	5900000
OX359199.1	118	0.881882	0.882979	1.06487	0.791973	-0.00109732	-3.91512	5900000	5950000
OX359199.1	119	1.16409	1.11539	1.05393	0.783839	0.0487032	173.768	5950000	6000000
OX359199.1	120	0.961211	0.845904	1.1528	0.857374	0.115307	411.404	6000000	6050000
OX359199.1	121	1.14768	0.905027	1.47207	1.09482	0.242649	865.746	6050000	6100000
OX359199.1	122	0.755431	0.536458	6.4357	4.78642	0.218973	781.272	6100000	6150000
OX359199.1	123	1.05285	1.02071	1.15481	0.858864	0.0321388	114.668	6150000	6200000
OX359199.1	124	0.870922	0.802128	1.10971	0.82532	0.0687937	245.449	6200000	6250000
OX359199.1	125	0.926369	0.792767	1.17195	0.871615	0.133602	476.677	6250000	6300000
OX359199.1	126	0.925689	0.775838	1.16375	0.865512	0.149851	534.652	6300000	6350000
OX359199.1	127	1.18529	1.22592	0.973163	0.723769	-0.040629	-144.96	6350000	6400000
OX359199.1	128	1.31364	1.44863	0.931426	0.692728	-0.134996	-481.653	6400000	6450000
OX359199.1	129	1.04175	1.01592	1.06545	0.792406	0.0258306	92.1608	6450000	6500000
OX359199.1	130	1.52507	1.49855	1.03456	0.769433	0.026517	94.61	6500000	6550000
OX359199.1	131	1.18773	1.14305	1.07412	0.798853	0.0446891	159.446	6550000	6600000
OX359199.1	132	1.09922	1.11351	0.967238	0.719363	-0.0142916	-50.9909	6600000	6650000
OX359199.1	133	1.66167	1.60573	1.03503	0.769783	0.0559338	199.566	6650000	6700000
OX359199.1	134	1.76754	1.72187	1.03177	0.767355	0.0456686	162.941	6700000	6750000
OX359199.1	135	1.55726	1.84314	0.852378	0.633938	-0.285883	-1020	6750000	6800000
OX359199.1	136	1.51042	1.4012	1.05168	0.782162	0.109218	389.677	6800000	6850000
OX359199.1	137	1.94004	1.77496	1.13671	0.845401	0.165078	588.981	6850000	6900000
OX359199.1	138	1.60293	1.54218	1.04073	0.774017	0.0607432	216.726	6900000	6950000
OX359199.1	139	1.26398	1.5186	0.830272	0.617497	-0.254619	-908.455	6950000	7000000
OX359199.1	140	1.37146	1.34561	1.08048	0.803585	0.025846	92.216	7000000	7050000
OX359199.1	141	1.23025	1.46684	0.826154	0.614434	-0.236593	-844.141	7050000	7100000
OX359199.1	142	1.33281	1.4864	0.89752	0.667512	-0.153589	-547.991	7100000	7150000
OX359199.1	143	1.6432	1.77123	0.915521	0.680899	-0.128021	-456.767	7150000	7200000
OX359199.1	144	1.40354	1.48252	0.9781	0.727441	-0.0789846	-281.809	7200000	7250000
OX359199.1	145	1.37391	1.43145	1.0269	0.763738	-0.0575404	-205.298	7250000	7300000
OX359199.1	146	1.43816	1.26065	1.14886	0.854437	0.17751	633.338	7300000	7350000
OX359199.1	147	0.932104	0.746759	1.33688	0.994275	0.185345	661.29	7350000	7400000
OX359199.1	148	0.981903	0.945551	1.12129	0.833936	0.0363526	129.702	7400000	7450000
OX359199.1	149	1.59383	1.33694	1.25673	0.934663	0.25689	916.557	7450000	7500000
OX359199.1	150	1.33699	1.21825	1.11393	0.828463	0.118735	423.633	7500000	7550000
OX359199.1	151	1.47495	1.54079	0.958082	0.712553	-0.0658459	-234.931	7550000	7600000
OX359199.1	152	1.34632	1.39303	1.07006	0.795837	-0.0467092	-166.654	7600000	7630000
OX359200.1	0	1.311	1.29834	1.18881	0.884151	0.0126516	45.1397	0	50000
OX359200.1	1	1.20461	1.19767	0.935506	0.695762	0.00694202	24.7684	50000	100000
OX359200.1	2	1.681	1.63609	1.02986	0.765936	0.0449099	160.234	100000	150000
OX359200.1	3	0.876543	1.12205	0.694461	0.51649	-0.245505	-875.935	150000	200000
OX359200.1	4	1.66009	1.44176	1.18156	0.878757	0.218338	779.009	200000	250000
OX359200.1	5	1.52821	1.45363	1.08132	0.80421	0.0745774	266.085	250000	300000
OX359200.1	6	1.41659	1.40438	1.00725	0.749124	0.0122168	43.5885	300000	350000
OX359200.1	7	1.53229	1.52823	1.01389	0.754056	0.004056	14.4714	350000	400000
OX359200.1	8	1.43253	1.40997	1.02202	0.760109	0.0225577	80.4835	400000	450000
OX359200.1	9	1.07226	0.901082	1.95088	1.45092	0.171182	610.758	450000	500000
OX359200.1	10	1.25523	1.15045	1.13636	0.845147	0.10478	373.843	500000	550000
OX359200.1	11	1.03572	1.0187	1.27776	0.95031	0.0170152	60.7084	550000	600000
OX359200.1	12	0.891434	0.93785	1.0347	0.769533	-0.0464167	-165.61	600000	650000
OX359200.1	13	1.20503	1.17883	1.02438	0.761857	0.026201	93.4823	650000	700000
OX359200.1	14	0.779208	0.69365	1.62443	1.20814	0.0855577	305.261	700000	750000
OX359200.1	15	1.1579	0.875481	1.73056	1.28706	0.282414	1007.63	750000	800000
OX359200.1	16	0.891157	0.85707	1.06056	0.788768	0.0340871	121.619	800000	850000
OX359200.1	17	1.395	1.43459	0.962593	0.715908	-0.0395967	-141.277	850000	900000
OX359200.1	18	1.12198	1.01811	1.13642	0.845189	0.103872	370.605	900000	950000
OX359200.1	19	1.52701	1.47198	1.00295	0.745926	0.0550345	196.358	950000	1000000
OX359200.1	20	1.38713	1.15839	1.24175	0.923526	0.228743	816.132	1000000	1050000
OX359200.1	21	0.817555	0.6046	1.50419	1.11871	0.212955	759.801	1050000	1100000
OX359200.1	22	0.993255	0.995238	1.00603	0.748215	-0.00198315	-7.07567	1100000	1150000
OX359200.1	23	1.25907	1.31854	1.02052	0.75899	-0.0594668	-212.171	1150000	1200000
OX359200.1	24	1.15686	1.09798	1.0614	0.789393	0.0588744	210.058	1200000	1250000
OX359200.1	25	1.37063	1.29253	1.06739	0.79385	0.0781066	278.676	1250000	1300000
OX359200.1	26	1.44948	1.54402	1.03291	0.768203	-0.0945338	-337.287	1300000	1350000
OX359200.1	27	0.616777	0.675757	0.906415	0.674127	-0.0589796	-210.433	1350000	1400000
OX359200.1	28	0.826055	0.915049	0.856215	0.636792	-0.0889941	-317.522	1400000	1450000
OX359200.1	29	0.684135	0.680123	1.15644	0.860081	0.00401223	14.3152	1450000	1500000
OX359200.1	30	0.903425	0.801575	1.18211	0.879168	0.10185	363.39	1500000	1550000
OX359200.1	31	0.924263	0.982696	0.908301	0.675529	-0.0584328	-208.482	1550000	1600000
OX359200.1	32	1.18762	0.931155	1.38673	1.03135	0.256469	915.056	1600000	1650000
OX359200.1	33	1.0063	1.03534	0.96878	0.720509	-0.0290432	-103.623	1650000	1700000
OX359200.1	34	1.00402	1.1635	0.874661	0.65051	-0.159476	-568.995	1700000	1750000
OX359200.1	35	0.392504	0.615014	0.629655	0.468293	-0.222511	-793.896	1750000	1800000
OX359200.1	36	0.361659	0.579903	0.56348	0.419076	-0.218244	-778.671	1800000	1850000
OX359200.1	37	1.12094	1.08911	1.03533	0.770003	0.0318339	113.58	1850000	1900000
OX359200.1	38	1.33484	1.2303	1.10535	0.822082	0.104536	372.974	1900000	1950000
OX359200.1	39	0.93665	0.741735	1.33983	0.996469	0.194914	695.434	1950000	2000000
OX359200.1	40	1.00416	0.89169	1.34459	1.00001	0.112469	401.278	2000000	2050000
OX359200.1	41	0.925244	0.69542	1.43791	1.06941	0.229825	819.99	2050000	2100000
OX359200.1	42	0.935476	0.851046	1.55196	1.15424	0.0844308	301.24	2100000	2150000
OX359200.1	43	0.499124	0.295182	2.11764	1.57495	0.203942	727.643	2150000	2200000
OX359200.1	44	0.810491	0.74266	1.23039	0.915074	0.0678314	242.015	2200000	2250000
OX359200.1	45	1.16762	1.2712	0.882223	0.656134	-0.103575	-369.546	2250000	2300000
OX359200.1	46	1.57962	1.89198	0.832852	0.619416	-0.312355	-1114.45	2300000	2350000
OX359200.1	47	1.67251	1.84112	0.90653	0.674212	-0.168613	-601.592	2350000	2400000
OX359200.1	48	1.73781	1.67122	1.04064	0.773957	0.066589	237.583	2400000	2450000
OX359200.1	49	1.29947	1.07084	1.24649	0.927051	0.228628	815.72	2450000	2500000
OX359200.1	50	1.25098	0.951967	1.33192	0.990586	0.299012	1066.84	2500000	2550000
OX359200.1	51	1.63908	1.49609	1.10022	0.818265	0.142993	510.183	2550000	2600000
OX359200.1	52	1.1764	1.02309	1.15292	0.857461	0.153301	546.963	2600000	2650000
OX359200.1	53	0.860028	0.808894	1.06785	0.794189	0.0511341	182.441	2650000	2700000
OX359200.1	54	0.647068	0.5858	1.09616	0.815246	0.061268	218.598	2700000	2750000
OX359200.1	55	0.969006	0.831731	1.20068	0.89298	0.137276	489.786	2750000	2800000
OX359200.1	56	0.888648	0.729076	1.24208	0.923771	0.159571	569.334	2800000	2850000
OX359200.1	57	0.521185	0.418778	1.25344	0.932221	0.102407	365.377	2850000	2900000
OX359200.1	58	0.560466	0.521817	1.16845	0.869011	0.0386489	137.895	2900000	2950000
OX359200.1	59	0.684011	0.5236	1.35352	1.00665	0.160411	572.329	2950000	3000000
OX359200.1	60	0.440452	0.311149	1.47874	1.09978	0.129303	461.34	3000000	3050000
OX359200.1	61	0.400002	0.26472	1.65297	1.22936	0.135282	482.672	3050000	3100000
OX359200.1	62	0.456391	0.351398	1.44217	1.07258	0.104993	374.604	3100000	3150000
OX359200.1	63	0.278943	0.212497	1.41146	1.04974	0.0664459	237.072	3150000	3200000
OX359200.1	64	0.53607	0.479182	1.16787	0.868578	0.056888	202.97	3200000	3250000
OX359200.1	65	0.427877	0.438037	0.989774	0.736124	-0.0101597	-36.2486	3250000	3300000
OX359200.1	66	0.408906	0.348709	1.18952	0.884683	0.0601975	214.779	3300000	3350000
OX359200.1	67	0.270874	0.237992	1.20384	0.895332	0.032882	117.32	3350000	3400000
OX359200.1	68	0.0974319	0.0747969	1.09798	0.8166	0.022635	80.7594	3400000	3450000
OX359200.1	69	0.0693189	0.0730582	0.340638	0.253342	-0.00373935	-13.3416	3450000	3500000
[truncated: 354 more rows]

## Sheet: Chreni_alternate
chr	range	heterogametic	homogametic	ratio	ratio_scaled	diff	diff_scaled	start	end
CAMWBO010000001.1	0	1.23596	1.1241	1.14323	0.764268	0.111861	367.16	0	50000
CAMWBO010000001.1	1	1.0571	0.904993	1.16307	0.77753	0.152111	499.27	50000	100000
CAMWBO010000001.1	2	0.477274	0.437322	3.73638	2.49782	0.0399521	131.134	100000	150000
CAMWBO010000001.1	3	1.14124	1.20172	0.986256	0.659326	-0.0604822	-198.52	150000	200000
CAMWBO010000001.1	4	1.02197	1.19828	0.823397	0.550452	-0.176305	-578.684	200000	250000
CAMWBO010000001.1	5	0.82408	0.675074	1.24209	0.830352	0.149006	489.078	250000	300000
CAMWBO010000001.1	6	0.948053	0.81317	1.17194	0.783459	0.134883	442.725	300000	350000
CAMWBO010000001.1	7	0.391108	0.290554	1.97384	1.31954	0.100554	330.047	350000	400000
CAMWBO010000001.1	8	0.293163	0.0935537	5.35229	3.57808	0.199609	655.173	400000	450000
CAMWBO010000001.1	9	0.342173	0.072709	6.64965	4.44538	0.269464	884.457	450000	500000
CAMWBO010000001.1	10	0.302221	0.0653805	10.6371	7.11107	0.236841	777.378	500000	550000
CAMWBO010000001.1	11	0.346898	0.205584	3.36627	2.2504	0.141314	463.834	550000	600000
CAMWBO010000001.1	12	0.516226	0.479139	1.0576	0.707021	0.0370865	121.728	600000	650000
CAMWBO010000001.1	13	0.284142	0.294026	0.995089	0.665231	-0.00988411	-32.4425	650000	700000
CAMWBO010000001.1	14	0.325512	0.215486	3.05912	2.04506	0.110027	361.139	700000	750000
CAMWBO010000001.1	15	0.471237	0.348327	2.24448	1.50047	0.12291	403.426	750000	800000
CAMWBO010000001.1	16	1.19355	1.09333	1.09743	0.733647	0.100227	328.973	800000	850000
CAMWBO010000001.1	17	1.10318	0.78697	1.47283	0.984607	0.316215	1037.91	850000	900000
CAMWBO010000001.1	18	1.48455	1.06188	2.91357	1.94776	0.422668	1387.32	900000	950000
CAMWBO010000001.1	19	1.38599	0.851873	1.71729	1.14803	0.534121	1753.14	950000	1000000
CAMWBO010000001.1	20	0.990454	0.710988	1.47747	0.987708	0.279466	917.288	1000000	1050000
CAMWBO010000001.1	21	1.29746	0.866203	1.52046	1.01645	0.431253	1415.5	1050000	1100000
CAMWBO010000001.1	22	1.40914	1.46291	0.974869	0.651713	-0.0537693	-176.486	1100000	1150000
CAMWBO010000001.1	23	1.68278	1.76167	0.958584	0.640827	-0.0788876	-258.932	1150000	1200000
CAMWBO010000001.1	24	1.3631	1.5391	0.901538	0.60269	-0.175996	-577.67	1200000	1250000
CAMWBO010000001.1	25	1.56626	1.80626	0.866703	0.579403	-0.239994	-787.728	1250000	1300000
CAMWBO010000001.1	26	0.990675	1.23464	0.796104	0.532207	-0.243968	-800.772	1300000	1350000
CAMWBO010000001.1	27	1.23416	1.2518	0.98632	0.659369	-0.0176404	-57.9008	1350000	1400000
CAMWBO010000001.1	28	0.639724	0.825213	0.761279	0.508925	-0.185489	-608.827	1400000	1450000
CAMWBO010000001.1	29	0.80508	0.934186	0.839083	0.560938	-0.129107	-423.764	1450000	1500000
CAMWBO010000001.1	30	1.3898	1.34088	1.03968	0.69504	0.0489187	160.565	1500000	1550000
CAMWBO010000001.1	31	1.14272	1.08539	1.06414	0.711391	0.0573302	188.174	1550000	1600000
CAMWBO010000001.1	32	1.06721	1.36774	0.79603	0.532157	-0.300523	-986.402	1600000	1650000
CAMWBO010000001.1	33	0.70927	1.17376	0.5914	0.395359	-0.464489	-1524.59	1650000	1700000
CAMWBO010000001.1	34	0.665145	1.16409	0.546266	0.365186	-0.498947	-1637.68	1700000	1750000
CAMWBO010000001.1	35	0.625287	0.873774	0.838752	0.560717	-0.248487	-815.605	1750000	1800000
CAMWBO010000001.1	36	0.628589	0.540484	1.01458	0.678263	0.0881051	289.186	1800000	1850000
CAMWBO010000001.1	37	0.818634	0.570076	1.45149	0.970344	0.248558	815.838	1850000	1900000
CAMWBO010000001.1	38	1.38673	1.10128	1.34188	0.897062	0.285447	936.92	1900000	1950000
CAMWBO010000001.1	39	0.76735	0.32553	2.54482	1.70124	0.44182	1450.18	1950000	2000000
CAMWBO010000001.1	40	0.861778	0.703168	4.1285	2.75996	0.15861	520.604	2000000	2050000
CAMWBO010000001.1	41	0.750405	0.596986	1.22018	0.815709	0.153419	503.565	2050000	2100000
CAMWBO010000001.1	42	0.469048	0.368875	1.3175	0.880764	0.100173	328.797	2100000	2150000
CAMWBO010000001.1	43	0.215197	0.162998	1.44938	0.968928	0.052199	171.332	2150000	2200000
CAMWBO010000001.1	44	0.516575	0.248692	8.75328	5.85169	0.267883	879.269	2200000	2250000
CAMWBO010000001.1	45	1.22839	1.19288	1.03112	0.68932	0.0355043	116.535	2250000	2300000
CAMWBO010000001.1	46	0.836658	0.784889	1.09884	0.734593	0.0517691	169.921	2300000	2350000
CAMWBO010000001.1	47	0.605582	0.64992	1.04596	0.699237	-0.0443378	-145.529	2350000	2400000
CAMWBO010000001.1	48	0.924367	0.564264	1.78318	1.19208	0.360103	1181.96	2400000	2450000
CAMWBO010000001.1	49	0.529903	0.680551	0.853152	0.570344	-0.150648	-494.471	2450000	2500000
CAMWBO010000001.1	50	0.881213	1.34653	0.638178	0.426631	-0.465316	-1527.3	2500000	2550000
CAMWBO010000001.1	51	1.22049	1.81849	0.636137	0.425266	-0.597998	-1962.8	2550000	2600000
CAMWBO010000001.1	52	2.07193	2.30218	0.897352	0.599892	-0.230244	-755.726	2600000	2650000
CAMWBO010000001.1	53	2.09975	2.19829	0.955836	0.63899	-0.0985361	-323.424	2650000	2700000
CAMWBO010000001.1	54	1.93657	1.96251	0.987043	0.659851	-0.0259325	-85.1177	2700000	2750000
CAMWBO010000001.1	55	2.1753	2.18763	1.00319	0.670648	-0.0123267	-40.4599	2750000	2800000
CAMWBO010000001.1	56	1.91773	1.63516	1.17152	0.783176	0.282563	927.452	2800000	2850000
CAMWBO010000001.1	57	1.62124	1.34933	1.20511	0.805629	0.271912	892.491	2850000	2900000
CAMWBO010000001.1	58	1.66809	1.69435	0.982331	0.656701	-0.026261	-86.1961	2900000	2950000
CAMWBO010000001.1	59	1.8095	1.84861	0.978585	0.654197	-0.0391165	-128.392	2950000	3000000
CAMWBO010000001.1	60	1.92758	1.96328	0.992641	0.663594	-0.035701	-117.181	3000000	3050000
CAMWBO010000001.1	61	2.10475	2.17377	0.96991	0.648398	-0.0690244	-226.558	3050000	3100000
CAMWBO010000001.1	62	2.12687	2.139	0.994538	0.664862	-0.0121308	-39.8168	3100000	3150000
CAMWBO010000001.1	63	1.88914	1.90027	0.995266	0.665349	-0.0111378	-36.5575	3150000	3200000
CAMWBO010000001.1	64	1.65612	1.82613	0.906117	0.605751	-0.170008	-558.014	3200000	3250000
CAMWBO010000001.1	65	1.67454	1.77016	0.947113	0.633158	-0.0956253	-313.87	3250000	3300000
CAMWBO010000001.1	66	1.61126	1.73707	0.928918	0.620994	-0.125812	-412.952	3300000	3350000
CAMWBO010000001.1	67	1.55973	1.6409	0.952039	0.636451	-0.0811623	-266.398	3350000	3400000
CAMWBO010000001.1	68	1.44059	1.62331	0.888369	0.593886	-0.182717	-599.728	3400000	3450000
CAMWBO010000001.1	69	1.23129	1.33502	0.85307	0.570289	-0.103735	-340.488	3450000	3500000
CAMWBO010000001.1	70	1.3981	1.53868	0.909414	0.607955	-0.14058	-461.424	3500000	3550000
CAMWBO010000001.1	71	1.53968	1.6393	0.938241	0.627227	-0.0996191	-326.978	3550000	3600000
CAMWBO010000001.1	72	1.62175	1.74904	0.927175	0.619829	-0.127291	-417.805	3600000	3650000
CAMWBO010000001.1	73	1.36055	1.48925	0.920921	0.615648	-0.128699	-422.425	3650000	3700000
CAMWBO010000001.1	74	1.39418	1.57938	0.875462	0.585258	-0.1852	-607.88	3700000	3750000
CAMWBO010000001.1	75	1.38245	1.4603	0.942441	0.630035	-0.0778511	-255.529	3750000	3800000
CAMWBO010000001.1	76	0.71551	0.849761	0.745283	0.498232	-0.134251	-440.65	3800000	3850000
CAMWBO010000001.1	77	1.07032	1.03216	0.837801	0.560081	0.0381606	125.254	3850000	3900000
CAMWBO010000001.1	78	1.12412	1.1655	0.959236	0.641262	-0.0413743	-135.802	3900000	3950000
CAMWBO010000001.1	79	1.20806	1.25733	0.951801	0.636292	-0.0492707	-161.721	3950000	4000000
CAMWBO010000001.1	80	1.17571	1.33064	0.894017	0.597662	-0.154934	-508.539	4000000	4050000
CAMWBO010000001.1	81	1.24102	1.32923	0.935707	0.625533	-0.0882123	-289.538	4050000	4100000
CAMWBO010000001.1	82	1.50061	1.61593	0.929897	0.621649	-0.115316	-378.501	4100000	4150000
CAMWBO010000001.1	83	1.49125	1.62725	0.919846	0.614929	-0.136006	-446.412	4150000	4200000
CAMWBO010000001.1	84	1.30247	1.43879	0.900733	0.602152	-0.136326	-447.461	4200000	4250000
CAMWBO010000001.1	85	1.3986	1.508	0.919644	0.614795	-0.109392	-359.057	4250000	4300000
CAMWBO010000001.1	86	1.50107	1.57782	0.959486	0.64143	-0.0767485	-251.91	4300000	4350000
CAMWBO010000001.1	87	1.13217	1.23846	0.73289	0.489947	-0.106297	-348.896	4350000	4400000
CAMWBO010000001.1	88	1.53066	1.64073	0.93211	0.623128	-0.110068	-361.276	4400000	4450000
CAMWBO010000001.1	89	1.61057	1.64226	1.00419	0.671313	-0.031689	-104.012	4450000	4500000
CAMWBO010000001.1	90	1.71505	1.79005	0.95487	0.638344	-0.075001	-246.175	4500000	4550000
CAMWBO010000001.1	91	1.73385	1.93414	0.900474	0.601979	-0.200282	-657.382	4550000	4600000
CAMWBO010000001.1	92	1.55355	1.83094	0.848734	0.56739	-0.277394	-910.485	4600000	4650000
CAMWBO010000001.1	93	1.78509	2.01973	0.885182	0.591756	-0.234648	-770.18	4650000	4700000
CAMWBO010000001.1	94	1.71572	1.84984	0.907594	0.606739	-0.13412	-440.221	4700000	4750000
CAMWBO010000001.1	95	1.82683	1.99526	0.912859	0.610259	-0.168432	-552.841	4750000	4800000
CAMWBO010000001.1	96	1.46047	1.66351	0.884263	0.591142	-0.203049	-666.464	4800000	4850000
CAMWBO010000001.1	97	1.72567	1.84763	0.931306	0.622591	-0.121966	-400.326	4850000	4900000
CAMWBO010000001.1	98	1.55569	1.71533	0.908858	0.607584	-0.15964	-523.984	4900000	4950000
CAMWBO010000001.1	99	1.30849	1.44108	0.910346	0.608578	-0.132591	-435.201	4950000	5000000
CAMWBO010000001.1	100	1.56779	1.83128	0.860478	0.575241	-0.263489	-864.847	5000000	5050000
CAMWBO010000001.1	101	1.69266	1.97662	0.843935	0.564182	-0.283964	-932.052	5050000	5100000
CAMWBO010000001.1	102	1.94709	2.15173	0.905071	0.605053	-0.204646	-671.707	5100000	5150000
CAMWBO010000001.1	103	2.2654	2.50197	0.907295	0.606539	-0.236564	-776.471	5150000	5200000
CAMWBO010000001.1	104	1.97687	2.15959	0.911946	0.609648	-0.182716	-599.725	5200000	5250000
CAMWBO010000001.1	105	1.42501	1.51985	0.951328	0.635976	-0.094844	-311.305	5250000	5300000
CAMWBO010000001.1	106	1.63222	1.62692	1.0081	0.67393	0.00530385	17.4088	5300000	5350000
CAMWBO010000001.1	107	1.84979	1.72047	1.07661	0.719727	0.129323	424.474	5350000	5400000
CAMWBO010000001.1	108	1.8808	1.77885	1.06848	0.714292	0.10195	334.629	5400000	5450000
CAMWBO010000001.1	109	1.62034	1.60414	1.00067	0.668959	0.016197	53.1631	5450000	5500000
CAMWBO010000001.1	110	1.22726	1.32038	1.00861	0.674273	-0.0931268	-305.669	5500000	5550000
CAMWBO010000001.1	111	1.30933	1.27566	1.01037	0.675448	0.0336757	110.533	5550000	5600000
CAMWBO010000001.1	112	0.922059	0.72596	1.51658	1.01386	0.196099	643.653	5600000	5650000
CAMWBO010000001.1	113	0.750386	0.451585	1.72682	1.15441	0.2988	980.747	5650000	5700000
CAMWBO010000001.1	114	0.642394	0.584064	1.22754	0.820626	0.0583296	191.454	5700000	5750000
CAMWBO010000001.1	115	0.99303	0.784271	1.34655	0.900186	0.20876	685.209	5750000	5800000
CAMWBO010000001.1	116	0.982735	0.951267	1.141	0.762774	0.0314684	103.288	5800000	5850000
CAMWBO010000001.1	117	1.1231	1.57288	0.71413	0.477406	-0.449775	-1476.29	5850000	5900000
CAMWBO010000001.1	118	1.32748	1.586	0.849323	0.567784	-0.258518	-848.53	5900000	5950000
CAMWBO010000001.1	119	1.10995	0.867463	1.35444	0.905464	0.242487	795.911	5950000	6000000
CAMWBO010000001.1	120	0.37197	0.638311	0.516435	0.345244	-0.266341	-874.206	6000000	6050000
CAMWBO010000001.1	121	0.747795	1.09763	0.638193	0.426641	-0.349832	-1148.25	6050000	6100000
CAMWBO010000001.1	122	0.75865	1.03023	0.753092	0.503452	-0.271575	-891.385	6100000	6150000
CAMWBO010000001.1	123	0.988371	0.983527	0.985901	0.659088	0.0048442	15.9001	6150000	6200000
CAMWBO010000001.1	124	0.346658	0.209924	6.55269	4.38056	0.136735	448.802	6200000	6250000
CAMWBO010000001.1	125	0.803091	0.768678	1.76643	1.18088	0.0344126	112.952	6250000	6300000
CAMWBO010000001.1	126	1.17971	1.18575	1.00996	0.675169	-0.00603404	-19.8054	6300000	6350000
CAMWBO010000001.1	127	1.5671	1.49235	1.04691	0.699874	0.0747402	245.319	6350000	6400000
CAMWBO010000001.1	128	1.32086	1.17617	1.21004	0.808929	0.144686	474.9	6400000	6450000
CAMWBO010000001.1	129	1.25362	1.06045	1.22017	0.8157	0.193172	634.045	6450000	6500000
CAMWBO010000001.1	130	1.34708	1.34322	1.03023	0.688722	0.00386333	12.6806	6500000	6550000
CAMWBO010000001.1	131	0.623785	0.489266	7.43433	4.96995	0.134519	441.529	6550000	6600000
CAMWBO010000001.1	132	0.567696	0.547149	10.2294	6.83851	0.0205464	67.4391	6600000	6650000
CAMWBO010000001.1	133	0.903719	1.05415	0.943836	0.630967	-0.150428	-493.748	6650000	6700000
CAMWBO010000001.1	134	0.617129	0.692583	0.924722	0.618189	-0.0754545	-247.663	6700000	6750000
CAMWBO010000001.1	135	0.880864	0.620269	2.5551	1.70812	0.260594	855.345	6750000	6800000
CAMWBO010000001.1	136	0.954524	0.730641	1.71068	1.14361	0.223883	734.847	6800000	6850000
CAMWBO010000001.1	137	0.802314	0.594733	2.38947	1.5974	0.207581	681.34	6850000	6900000
CAMWBO010000001.1	138	0.568648	0.491342	1.89103	1.26418	0.0773056	253.739	6900000	6950000
CAMWBO010000001.1	139	0.941926	0.90296	1.05526	0.705454	0.0389666	127.899	6950000	7000000
CAMWBO010000001.1	140	0.624992	0.54523	1.26082	0.842878	0.0797614	261.799	7000000	7050000
CAMWBO010000001.1	141	0.636596	0.523673	1.22388	0.818177	0.112923	370.646	7050000	7100000
CAMWBO010000001.1	142	0.182143	0.265954	0.694923	0.464565	-0.0838114	-275.093	7100000	7150000
CAMWBO010000001.1	143	0.278354	0.33921	0.81045	0.541797	-0.0608559	-199.746	7150000	7200000
CAMWBO010000001.1	144	0.300036	0.353149	0.881361	0.589201	-0.0531136	-174.334	7200000	7250000
CAMWBO010000001.1	145	0.170459	0.226152	0.605217	0.404596	-0.0556927	-182.799	7250000	7300000
CAMWBO010000001.1	146	0.663546	0.820342	0.555257	0.371197	-0.156796	-514.649	7300000	7350000
CAMWBO010000001.1	147	1.61743	1.33575	1.23712	0.827028	0.281683	924.564	7350000	7400000
CAMWBO010000001.1	148	1.24572	1.26548	0.942528	0.630093	-0.0197543	-64.8393	7400000	7450000
CAMWBO010000001.1	149	0.561754	0.745616	0.657915	0.439825	-0.183862	-603.488	7450000	7500000
CAMWBO010000001.1	150	1.09141	1.27253	0.835079	0.558262	-0.181123	-594.498	7500000	7550000
CAMWBO010000001.1	151	0.785959	0.766051	0.978251	0.653974	0.0199079	65.3433	7550000	7600000
CAMWBO010000001.1	152	0.920556	0.957899	0.942247	0.629905	-0.0373427	-122.569	7600000	7650000
CAMWBO010000001.1	153	0.837142	0.761906	1.13352	0.757771	0.0752363	246.947	7650000	7700000
CAMWBO010000001.1	154	0.890649	0.861674	1.06905	0.714672	0.0289753	95.1052	7700000	7750000
CAMWBO010000001.1	155	1.39851	1.40831	1.0358	0.692446	-0.00979311	-32.1438	7750000	7800000
CAMWBO010000001.1	156	1.0209	1.17474	0.845778	0.565414	-0.153845	-504.963	7800000	7850000
CAMWBO010000001.1	157	1.31226	1.21206	1.07683	0.719877	0.100206	328.903	7850000	7900000
CAMWBO010000001.1	158	1.30736	1.43472	1.02404	0.684585	-0.12736	-418.033	7900000	7950000
CAMWBO010000001.1	159	1.59424	1.59969	0.996439	0.666133	-0.00545637	-17.9094	7950000	8000000
CAMWBO010000001.1	160	1.62001	1.64666	0.986677	0.659607	-0.026648	-87.4663	8000000	8050000
CAMWBO010000001.1	161	0.655601	0.727364	0.918903	0.614299	-0.0717636	-235.548	8050000	8100000
CAMWBO010000001.1	162	0.747988	0.84268	0.929833	0.621606	-0.0946916	-310.805	8100000	8150000
CAMWBO010000001.1	163	1.15379	1.2109	0.948793	0.634281	-0.0571125	-187.459	8150000	8200000
CAMWBO010000001.1	164	1.40069	1.09544	1.29873	0.86822	0.305246	1001.9	8200000	8250000
CAMWBO010000001.1	165	1.12548	1.24251	0.898197	0.600457	-0.117031	-384.13	8250000	8300000
CAMWBO010000001.1	166	0.752427	0.919839	0.737	0.492694	-0.167412	-549.492	8300000	8350000
CAMWBO010000001.1	167	1.0815	1.45644	0.742956	0.496676	-0.374938	-1230.65	8350000	8400000
CAMWBO010000001.1	168	1.30778	1.39605	0.938407	0.627338	-0.0882716	-289.733	8400000	8450000
CAMWBO010000001.1	169	1.57051	1.45929	1.11884	0.747957	0.11122	365.056	8450000	8500000
CAMWBO010000001.1	170	1.71966	1.78445	1.00299	0.670515	-0.0647923	-212.667	8500000	8550000
CAMWBO010000001.1	171	1.11797	1.2308	0.918045	0.613725	-0.112831	-370.344	8550000	8600000
CAMWBO010000001.1	172	1.01023	1.13454	0.933026	0.62374	-0.124308	-408.014	8600000	8650000
CAMWBO010000001.1	173	1.06587	1.17798	0.960243	0.641936	-0.112106	-367.964	8650000	8700000
CAMWBO010000001.1	174	0.962011	0.881187	1.09959	0.73509	0.0808237	265.286	8700000	8750000
CAMWBO010000001.1	175	1.1597	1.12738	1.02095	0.682518	0.0323236	106.095	8750000	8800000
CAMWBO010000001.1	176	1.42283	1.42148	0.979255	0.654645	0.00135463	4.44629	8800000	8850000
CAMWBO010000001.1	177	1.50248	1.68459	0.882848	0.590196	-0.182107	-597.727	8850000	8900000
CAMWBO010000001.1	178	1.62242	1.67947	0.965594	0.645513	-0.057046	-187.241	8900000	8950000
CAMWBO010000001.1	179	1.34994	1.50147	0.89225	0.596481	-0.151532	-497.371	8950000	9000000
CAMWBO010000001.1	180	1.1533	1.16431	1.02271	0.683699	-0.0110136	-36.1497	9000000	9050000
CAMWBO010000001.1	181	1.60673	1.72386	0.942508	0.630079	-0.117123	-384.432	9050000	9100000
CAMWBO010000001.1	182	0.949173	0.96959	0.944168	0.631189	-0.0204179	-67.0173	9100000	9150000
CAMWBO010000001.1	183	1.16857	1.265	0.930966	0.622364	-0.096422	-316.484	9150000	9200000
CAMWBO010000001.1	184	1.61919	1.67683	1.01513	0.678628	-0.0576434	-189.202	9200000	9250000
CAMWBO010000001.1	185	1.31616	1.33814	1.03049	0.688895	-0.0219814	-72.1492	9250000	9300000
CAMWBO010000001.1	186	1.60003	1.6319	0.989359	0.6614	-0.0318666	-104.595	9300000	9350000
CAMWBO010000001.1	187	1.39395	1.30582	1.15984	0.775368	0.0881298	289.267	9350000	9400000
CAMWBO010000001.1	188	1.98975	1.98135	1.00494	0.671814	0.00839617	27.5586	9400000	9450000
CAMWBO010000001.1	189	1.30566	1.45325	0.927498	0.620045	-0.147595	-484.449	9450000	9460000
CAMWBO010000002.1	0	1.65346	1.30518	1.46919	0.982173	0.348282	1143.16	0	50000
CAMWBO010000002.1	1	1.44443	1.04842	1.76096	1.17723	0.396018	1299.84	50000	100000
CAMWBO010000002.1	2	1.37282	1.2772	1.11783	0.747287	0.0956265	313.873	100000	150000
CAMWBO010000002.1	3	1.58639	1.38124	1.19567	0.799323	0.205151	673.365	150000	200000
CAMWBO010000002.1	4	1.33085	1.32271	1.00838	0.674114	0.00813769	26.7102	200000	250000
CAMWBO010000002.1	5	1.00105	0.894215	1.18405	0.791551	0.106835	350.663	250000	300000
CAMWBO010000002.1	6	1.21476	1.33197	0.919994	0.615028	-0.117217	-384.739	300000	350000
CAMWBO010000002.1	7	1.44018	1.41319	1.15954	0.775165	0.0269935	88.6002	350000	400000
CAMWBO010000002.1	8	1.77087	1.78968	0.991537	0.662856	-0.0188151	-61.7566	400000	450000
CAMWBO010000002.1	9	1.76081	1.55951	1.12938	0.755005	0.201305	660.742	450000	500000
CAMWBO010000002.1	10	1.53801	1.69681	0.928039	0.620407	-0.158798	-521.219	500000	550000
CAMWBO010000002.1	11	1.43684	1.70198	0.848713	0.567376	-0.265143	-870.276	550000	600000
CAMWBO010000002.1	12	1.1862	1.41529	0.837887	0.560139	-0.229092	-751.946	600000	650000
CAMWBO010000002.1	13	0.983291	1.15067	0.859026	0.57427	-0.167382	-549.395	650000	700000
CAMWBO010000002.1	14	1.60814	1.53478	1.06018	0.708747	0.0733621	240.795	700000	750000
CAMWBO010000002.1	15	1.51183	1.31193	1.31387	0.878339	0.199901	656.131	750000	800000
CAMWBO010000002.1	16	1.3974	1.33806	1.02933	0.688118	0.0593415	194.776	800000	850000
CAMWBO010000002.1	17	1.16654	1.25037	0.927449	0.620012	-0.0838299	-275.153	850000	900000
CAMWBO010000002.1	18	0.959027	1.25722	0.783929	0.524067	-0.298198	-978.771	900000	950000
CAMWBO010000002.1	19	0.874378	1.04756	0.900173	0.601778	-0.173179	-568.423	950000	1000000
CAMWBO010000002.1	20	0.905893	0.842863	1.13698	0.760085	0.0630301	206.883	1000000	1050000
CAMWBO010000002.1	21	1.25791	1.22526	1.04818	0.700723	0.0326444	107.148	1050000	1100000
CAMWBO010000002.1	22	1.51891	1.50602	1.10255	0.737068	0.0128916	42.3139	1100000	1150000
CAMWBO010000002.1	23	0.865817	0.799866	1.15568	0.772586	0.0659508	216.469	1150000	1200000
CAMWBO010000002.1	24	0.421163	0.579533	0.680586	0.454981	-0.158369	-519.813	1200000	1250000
CAMWBO010000002.1	25	1.05572	1.21562	0.859658	0.574693	-0.159901	-524.842	1250000	1300000
CAMWBO010000002.1	26	1.0618	1.17201	0.917504	0.613364	-0.110211	-361.743	1300000	1350000
CAMWBO010000002.1	27	0.988701	1.00972	1.00656	0.672899	-0.021018	-68.9869	1350000	1400000
CAMWBO010000002.1	28	1.03469	0.902859	1.15591	0.772743	0.131827	432.694	1400000	1450000
CAMWBO010000002.1	29	1.48662	1.32745	1.11987	0.748645	0.15917	522.44	1450000	1500000
CAMWBO010000002.1	30	1.09783	1.06027	1.01557	0.67892	0.0375597	123.282	1500000	1550000
CAMWBO010000002.1	31	0.742305	0.70639	1.17442	0.785113	0.0359151	117.883	1550000	1600000
CAMWBO010000002.1	32	0.525886	0.494375	1.19424	0.798369	0.0315109	103.428	1600000	1650000
CAMWBO010000002.1	33	0.890009	1.04645	0.851213	0.569048	-0.156436	-513.468	1650000	1700000
CAMWBO010000002.1	34	0.912021	0.782006	1.44873	0.968499	0.130015	426.745	1700000	1750000
CAMWBO010000002.1	35	0.40815	0.205214	2.31126	1.54511	0.202937	666.096	1750000	1800000
CAMWBO010000002.1	36	0.680186	0.621308	1.31037	0.876002	0.0588778	193.254	1800000	1850000
CAMWBO010000002.1	37	0.916981	0.956366	0.955127	0.638515	-0.0393854	-129.274	1850000	1900000
CAMWBO010000002.1	38	0.668858	0.706184	1.00641	0.672801	-0.0373259	-122.514	1900000	1950000
CAMWBO010000002.1	39	0.629819	0.862212	0.72863	0.487099	-0.232393	-762.78	1950000	2000000
CAMWBO010000002.1	40	0.07578	0.292314	0.258072	0.172524	-0.216534	-710.727	2000000	2050000
CAMWBO010000002.1	41	0.14428	0.250558	0.56008	0.374421	-0.106278	-348.833	2050000	2100000
CAMWBO010000002.1	42	0.189692	0.206499	0.828699	0.553996	-0.0168066	-55.1641	2100000	2150000
CAMWBO010000002.1	43	0.105985	0.0895873	1.52846	1.0218	0.016398	53.8229	2150000	2200000
CAMWBO010000002.1	44	0.089402	0.421287	0.206948	0.138348	-0.331885	-1089.34	2200000	2250000
CAMWBO010000002.1	45	0.0755962	0.728862	0.10131	0.0677273	-0.653266	-2144.21	2250000	2300000
CAMWBO010000002.1	46	0.122953	0.513341	0.232651	0.15553	-0.390388	-1281.36	2300000	2350000
CAMWBO010000002.1	47	0.567664	0.766979	0.602152	0.402547	-0.199315	-654.209	2350000	2400000
CAMWBO010000002.1	48	0.681495	0.75601	0.911444	0.609313	-0.0745153	-244.58	2400000	2450000
CAMWBO010000002.1	49	0.623238	0.562169	2.12386	1.41983	0.0610688	200.445	2450000	2500000
CAMWBO010000002.1	50	1.21681	1.20687	1.0707	0.715775	0.00993739	32.6173	2500000	2550000
CAMWBO010000002.1	51	0.892988	0.848888	1.07639	0.719581	0.0441002	144.749	2550000	2600000
CAMWBO010000002.1	52	0.870357	0.927718	0.95988	0.641693	-0.0573607	-188.274	2600000	2650000
CAMWBO010000002.1	53	0.830819	0.662865	1.47329	0.984917	0.167954	551.272	2650000	2700000
CAMWBO010000002.1	54	0.695994	0.635963	1.2058	0.806091	0.0600303	197.037	2700000	2750000
CAMWBO010000002.1	55	0.829995	0.698242	1.31044	0.876045	0.131753	432.451	2750000	2800000
CAMWBO010000002.1	56	0.392194	0.167782	2.89449	1.93501	0.224412	736.586	2800000	2850000
CAMWBO010000002.1	57	0.829404	0.767355	1.15169	0.769921	0.0620488	203.662	2850000	2900000
CAMWBO010000002.1	58	1.12917	1.12344	1.04345	0.697559	0.00573373	18.8197	2900000	2950000
CAMWBO010000002.1	59	0.665884	0.512079	1.45936	0.975599	0.153804	504.83	2950000	3000000
CAMWBO010000002.1	60	1.06751	0.937545	1.15826	0.77431	0.129966	426.584	3000000	3050000
CAMWBO010000002.1	61	0.961592	0.946932	1.10587	0.739289	0.0146598	48.1177	3050000	3100000
CAMWBO010000002.1	62	1.05226	0.867189	1.20595	0.806194	0.185073	607.463	3100000	3150000
CAMWBO010000002.1	63	0.27685	0.698399	0.464843	0.310754	-0.421549	-1383.64	3150000	3200000
CAMWBO010000002.1	64	0.194826	0.886279	0.23418	0.156553	-0.691453	-2269.55	3200000	3250000
CAMWBO010000002.1	65	0.220244	1.15544	0.164805	0.110175	-0.935196	-3069.58	3250000	3300000
CAMWBO010000002.1	66	0.538811	1.26232	0.444645	0.297251	-0.723513	-2374.77	3300000	3350000
CAMWBO010000002.1	67	0.590509	1.40061	0.432448	0.289097	-0.810097	-2658.97	3350000	3400000
CAMWBO010000002.1	68	1.55156	1.64084	0.946628	0.632834	-0.0892792	-293.04	3400000	3450000
CAMWBO010000002.1	69	1.46638	1.32793	1.119	0.748068	0.138452	454.44	3450000	3500000
CAMWBO010000002.1	70	1.74989	1.80391	0.984156	0.657922	-0.0540163	-177.297	3500000	3550000
CAMWBO010000002.1	71	1.65501	2.51945	0.714839	0.47788	-0.864445	-2837.35	3550000	3600000
CAMWBO010000002.1	72	1.78713	1.49241	1.33942	0.895423	0.294728	967.382	3600000	3650000
CAMWBO010000002.1	73	1.89779	1.50504	1.35287	0.904409	0.392755	1289.13	3650000	3700000
CAMWBO010000002.1	74	1.9453	2.05503	0.950429	0.635375	-0.109728	-360.159	3700000	3750000
CAMWBO010000002.1	75	1.28635	1.48155	0.880897	0.588892	-0.195201	-640.706	3750000	3800000
CAMWBO010000002.1	76	1.61842	1.73455	0.933974	0.624375	-0.116125	-381.156	3800000	3850000
CAMWBO010000002.1	77	1.5266	1.60047	0.982567	0.65686	-0.0738647	-242.445	3850000	3900000
CAMWBO010000002.1	78	1.59796	1.64611	0.971472	0.649442	-0.0481422	-158.016	3900000	3950000
CAMWBO010000002.1	79	1.32219	1.29242	1.01873	0.681032	0.0297641	97.6942	3950000	4000000
CAMWBO010000002.1	80	1.43395	1.43097	1.00193	0.669802	0.00298641	9.80225	4000000	4050000
CAMWBO010000002.1	81	1.385	1.39009	1.00182	0.669731	-0.00508648	-16.6953	4050000	4100000
CAMWBO010000002.1	82	1.09714	1.07751	1.02479	0.685087	0.0196356	64.4496	4100000	4150000
CAMWBO010000002.1	83	0.89401	0.849843	1.05424	0.704771	0.0441673	144.97	4150000	4200000
CAMWBO010000002.1	84	0.643168	0.609864	1.3782	0.921344	0.0333043	109.314	4200000	4250000
CAMWBO010000002.1	85	1.15472	1.14832	1.01159	0.676261	0.0063933	20.9846	4250000	4300000
CAMWBO010000002.1	86	0.815206	0.804081	1.01389	0.677801	0.0111247	36.5146	4300000	4350000
CAMWBO010000002.1	87	0.49394	0.430136	1.22517	0.819042	0.063804	209.423	4350000	4400000
CAMWBO010000002.1	88	0.48711	0.520186	0.927674	0.620163	-0.0330769	-108.568	4400000	4450000
CAMWBO010000002.1	89	1.10562	1.0748	1.03461	0.691652	0.0308232	101.171	4450000	4500000
CAMWBO010000002.1	90	0.823587	0.855721	0.920276	0.615217	-0.0321345	-105.475	4500000	4550000
CAMWBO010000002.1	91	1.039	1.00276	1.04799	0.700598	0.0362423	118.957	4550000	4600000
CAMWBO010000002.1	92	0.749476	0.735844	1.01337	0.677454	0.0136323	44.7451	4600000	4650000
CAMWBO010000002.1	93	0.72011	0.709753	1.01419	0.678002	0.0103569	33.9944	4650000	4700000
CAMWBO010000002.1	94	0.882533	0.914582	0.960919	0.642387	-0.0320489	-105.194	4700000	4750000
CAMWBO010000002.1	95	1.91224	1.95126	0.981612	0.656221	-0.0390243	-128.089	4750000	4800000
CAMWBO010000002.1	96	1.9441	1.9901	0.97917	0.654589	-0.0459975	-150.977	4800000	4850000
CAMWBO010000002.1	97	1.82527	1.88391	0.97371	0.650938	-0.0586455	-192.491	4850000	4900000
CAMWBO010000002.1	98	1.6561	1.52774	1.17182	0.783381	0.128359	421.309	4900000	4950000
CAMWBO010000002.1	99	1.63998	1.65188	0.999832	0.668401	-0.0119028	-39.0684	4950000	5000000
CAMWBO010000002.1	100	1.48213	1.33004	1.10149	0.736358	0.152091	499.206	5000000	5050000
CAMWBO010000002.1	101	1.33303	1.20188	1.09938	0.734948	0.131152	430.479	5050000	5100000
CAMWBO010000002.1	102	1.50693	1.3698	1.10496	0.738681	0.137129	450.095	5100000	5150000
CAMWBO010000002.1	103	1.37756	1.35604	1.02758	0.686952	0.0215171	70.6253	5150000	5200000
CAMWBO010000002.1	104	1.49289	1.56705	0.957061	0.639808	-0.0741609	-243.417	5200000	5250000
CAMWBO010000002.1	105	1.58591	1.62904	0.975944	0.652432	-0.0431224	-141.54	5250000	5300000
CAMWBO010000002.1	106	1.48798	1.30357	1.14848	0.767773	0.184403	605.264	5300000	5350000
CAMWBO010000002.1	107	1.17146	1.34757	0.860131	0.575009	-0.176108	-578.035	5350000	5400000
CAMWBO010000002.1	108	0.933717	0.989353	0.953462	0.637402	-0.0556363	-182.614	5400000	5450000
CAMWBO010000002.1	109	1.73549	1.59883	1.10538	0.73896	0.136654	448.536	5450000	5500000
CAMWBO010000002.1	110	1.5576	1.58245	0.976204	0.652605	-0.0248522	-81.5719	5500000	5550000
CAMWBO010000002.1	111	1.03442	1.32712	0.814388	0.544429	-0.292701	-960.728	5550000	5600000
CAMWBO010000002.1	112	1.02262	1.1052	0.918366	0.61394	-0.0825744	-271.033	5600000	5650000
CAMWBO010000002.1	113	1.60567	1.54309	1.03554	0.692273	0.0625856	205.424	5650000	5700000
CAMWBO010000002.1	114	0.805546	1.21591	0.645336	0.431416	-0.410361	-1346.92	5700000	5750000
CAMWBO010000002.1	115	1.04698	1.33658	0.776299	0.518967	-0.289596	-950.537	5750000	5800000
CAMWBO010000002.1	116	1.11907	1.32693	0.834856	0.558112	-0.20786	-682.254	5800000	5850000
CAMWBO010000002.1	117	0.832797	0.842662	1.11043	0.742339	-0.00986556	-32.3816	5850000	5900000
CAMWBO010000002.1	118	0.808532	0.622821	1.40988	0.942525	0.185711	609.557	5900000	5950000
CAMWBO010000002.1	119	0.848596	0.59184	1.78873	1.19579	0.256756	842.747	5950000	6000000
CAMWBO010000002.1	120	0.343783	0.211569	5.57966	3.73008	0.132214	433.963	6000000	6050000
CAMWBO010000002.1	121	0.278729	0.0868206	13.035	8.71406	0.191908	629.897	6050000	6100000
CAMWBO010000002.1	122	0.446329	0.252516	1.89229	1.26502	0.193812	636.147	6100000	6150000
CAMWBO010000002.1	123	0.564636	0.253645	8.2048	5.48502	0.310992	1020.76	6150000	6200000
CAMWBO010000002.1	124	1.22021	0.832622	1.5371	1.02757	0.387588	1272.17	6200000	6250000
CAMWBO010000002.1	125	0.472401	0.750489	0.55499	0.371018	-0.278088	-912.764	6250000	6300000
CAMWBO010000002.1	126	0.728813	0.875366	0.882179	0.589748	-0.146553	-481.028	6300000	6350000
CAMWBO010000002.1	127	0.637838	0.549369	1.22636	0.819841	0.0884689	290.38	6350000	6400000
CAMWBO010000002.1	128	0.533541	0.541876	1.01307	0.677254	-0.00833441	-27.3559	6400000	6450000
CAMWBO010000002.1	129	0.854546	0.835361	1.04756	0.700311	0.019185	62.9705	6450000	6500000
CAMWBO010000002.1	130	1.05901	1.0256	1.03263	0.690326	0.0334107	109.663	6500000	6550000
CAMWBO010000002.1	131	0.861061	0.791412	1.12891	0.754691	0.0696483	228.606	6550000	6600000
CAMWBO010000002.1	132	0.926851	0.760869	1.30887	0.874996	0.165981	544.798	6600000	6650000
CAMWBO010000002.1	133	1.13951	1.05196	1.1044	0.73831	0.0875503	287.365	6650000	6700000
CAMWBO010000002.1	134	0.803997	0.643908	1.22584	0.819492	0.160088	525.455	6700000	6750000
CAMWBO010000002.1	135	0.59561	0.401919	1.55591	1.04015	0.19369	635.747	6750000	6800000
CAMWBO010000002.1	136	1.13559	0.924126	1.34171	0.896949	0.211466	694.092	6800000	6850000
CAMWBO010000002.1	137	1.24235	0.707733	1.90658	1.27458	0.53462	1754.77	6850000	6900000
CAMWBO010000002.1	138	0.361718	0.485304	0.747602	0.499782	-0.123586	-405.643	6900000	6950000
CAMWBO010000002.1	139	0.305047	0.541293	0.557673	0.372812	-0.236246	-775.426	6950000	7000000
CAMWBO010000002.1	140	0.447518	0.612174	0.710367	0.47489	-0.164656	-540.448	7000000	7050000
CAMWBO010000002.1	141	1.08967	1.07225	1.05623	0.706105	0.017421	57.1805	7050000	7100000
CAMWBO010000002.1	142	1.3118	1.29771	1.02038	0.68214	0.0140899	46.2469	7100000	7150000
CAMWBO010000002.1	143	0.569253	0.667163	0.956326	0.639317	-0.0979091	-321.365	7150000	7200000
CAMWBO010000002.1	144	0.893251	0.685227	1.34808	0.901208	0.208024	682.793	7200000	7250000
CAMWBO010000002.1	145	1.31437	0.990045	1.53514	1.02626	0.32432	1064.51	7250000	7300000
CAMWBO010000002.1	146	0.611225	0.430965	1.51454	1.01249	0.18026	591.666	7300000	7350000
CAMWBO010000002.1	147	0.92175	1.02841	0.906204	0.60581	-0.106658	-350.082	7350000	7400000
CAMWBO010000002.1	148	0.500026	0.968274	0.590556	0.394795	-0.468248	-1536.92	7400000	7450000
CAMWBO010000002.1	149	0.767698	0.782669	1.06462	0.711716	-0.0149709	-49.1388	7450000	7500000
CAMWBO010000002.1	150	0.985601	0.975627	1.10226	0.736873	0.0099733	32.7352	7500000	7550000
CAMWBO010000002.1	151	0.964874	1.20122	0.823461	0.550495	-0.236346	-775.756	7550000	7600000
CAMWBO010000002.1	152	0.779596	0.706776	1.11476	0.745234	0.0728195	239.014	7600000	7650000
CAMWBO010000002.1	153	0.976987	0.951251	1.04414	0.698024	0.0257361	84.4731	7650000	7700000
CAMWBO010000002.1	154	1.28328	1.15297	1.20306	0.804263	0.130305	427.699	7700000	7750000
CAMWBO010000002.1	155	0.550178	0.671448	0.853338	0.570468	-0.121271	-398.045	7750000	7800000
CAMWBO010000002.1	156	0.120681	0.117047	1.1329	0.757361	0.00363421	11.9285	7800000	7850000
CAMWBO010000002.1	157	0.628759	0.60285	4.63458	3.09828	0.0259094	85.042	7850000	7900000
CAMWBO010000002.1	158	0.595999	0.475296	2.31832	1.54983	0.120703	396.181	7900000	7950000
CAMWBO010000002.1	159	0.999125	0.869749	1.16524	0.778979	0.129376	424.648	7950000	8000000
CAMWBO010000002.1	160	0.898759	0.908185	1.02649	0.686225	-0.00942626	-30.9397	8000000	8050000
CAMWBO010000002.1	161	1.09912	0.982186	1.18457	0.7919	0.11693	383.796	8050000	8100000
CAMWBO010000002.1	162	0.370579	0.203325	3.07841	2.05796	0.167253	548.973	8100000	8150000
CAMWBO010000002.1	163	0.851391	0.840308	1.12462	0.751826	0.0110829	36.3772	8150000	8200000
CAMWBO010000002.1	164	0.846545	0.385336	4.39	2.93478	0.461209	1513.82	8200000	8250000
CAMWBO010000002.1	165	0.873366	0.790831	1.35927	0.908689	0.0825349	270.903	8250000	8300000
CAMWBO010000002.1	166	0.791886	0.733961	1.08958	0.728399	0.0579251	190.127	8300000	8350000
CAMWBO010000002.1	167	0.269109	0.213978	1.37768	0.920997	0.0551317	180.958	8350000	8400000
CAMWBO010000002.1	168	0.075315	0.0617203	1.76674	1.18109	0.0135947	44.6215	8400000	8450000
CAMWBO010000002.1	169	0.311317	0.33161	1.25449	0.838646	-0.0202933	-66.6083	8450000	8500000
CAMWBO010000002.1	170	0.381236	0.207296	4.56506	3.0518	0.17394	570.919	8500000	8550000
CAMWBO010000002.1	171	0.0649475	0.0496926	1.69555	1.1335	0.0152549	50.071	8550000	8600000
CAMWBO010000002.1	172	0.117546	0.333091	0.54908	0.367067	-0.215544	-707.478	8600000	8650000
CAMWBO010000002.1	173	0.178757	0.247375	1.27077	0.849527	-0.0686172	-225.221	8650000	8700000
CAMWBO010000002.1	174	0.12198	0.165086	1.10361	0.737781	-0.0431057	-141.485	8700000	8750000
CAMWBO010000002.1	175	0.382808	0.208376	2.41266	1.61289	0.174432	572.537	8750000	8800000
CAMWBO010000002.1	176	0.149408	0.105152	1.52106	1.01685	0.0442553	145.259	8800000	8850000
CAMWBO010000002.1	177	0.181774	0.0975533	2.97019	1.98561	0.0842211	276.437	8850000	8900000
CAMWBO010000002.1	178	0.0930378	0.108076	0.964295	0.644645	-0.0150387	-49.3612	8900000	8950000
CAMWBO010000002.1	179	0.115656	0.0980036	1.0815	0.723	0.0176524	57.9403	8950000	9000000
CAMWBO010000002.1	180	0.18329	0.0856813	2.76472	1.84825	0.0976089	320.38	9000000	9050000
CAMWBO010000002.1	181	0.623764	0.441141	2.642	1.76621	0.182623	599.421	9050000	9100000
CAMWBO010000002.1	182	0.634292	0.413223	1.5723	1.0511	0.221068	725.61	9100000	9150000
CAMWBO010000002.1	183	0.595289	0.741182	0.763943	0.510706	-0.145894	-478.864	9150000	9200000
CAMWBO010000002.1	184	0.34831	0.64007	0.535525	0.358006	-0.291759	-957.637	9200000	9250000
CAMWBO010000002.1	185	0.835207	0.966332	0.950405	0.635359	-0.131125	-430.39	9250000	9300000
CAMWBO010000002.1	186	1.11641	0.861999	1.35707	0.907217	0.254407	835.035	9300000	9350000
CAMWBO010000002.1	187	0.476951	0.394739	25.9134	17.3235	0.0822124	269.844	9350000	9400000
CAMWBO010000002.1	188	0.762254	0.689973	1.50647	1.0071	0.0722807	237.246	9400000	9450000
CAMWBO010000002.1	189	0.307733	0.177244	2.11561	1.41431	0.130489	428.303	9450000	9500000
CAMWBO010000002.1	190	0.130197	0.128924	1.00654	0.672888	0.00127287	4.17792	9500000	9550000
CAMWBO010000002.1	191	0.505903	0.545166	0.983323	0.657365	-0.0392634	-128.874	9550000	9600000
CAMWBO010000002.1	192	0.547922	0.613072	0.685052	0.457967	-0.0651497	-213.84	9600000	9650000
CAMWBO010000002.1	193	0.0618199	0.0776126	0.368705	0.246484	-0.0157926	-51.836	9650000	9700000
CAMWBO010000002.1	194	0.74697	0.660088	1.26661	0.846746	0.0868824	285.173	9700000	9750000
CAMWBO010000002.1	195	0.415861	0.390091	1.23731	0.827156	0.0257695	84.5827	9750000	9800000
CAMWBO010000002.1	196	0.701389	0.633097	1.8203	1.21689	0.0682917	224.153	9800000	9850000
CAMWBO010000002.1	197	0.347805	0.461107	0.753196	0.503522	-0.113301	-371.888	9850000	9900000
CAMWBO010000002.1	198	0.256526	0.282041	0.965938	0.645742	-0.0255154	-83.7487	9900000	9950000
CAMWBO010000002.1	199	0.351148	0.548997	0.793577	0.530517	-0.197848	-649.394	9950000	10000000
CAMWBO010000002.1	200	0.413617	0.399742	1.08139	0.722922	0.013875	45.5417	10000000	10050000
CAMWBO010000002.1	201	0.297694	0.35546	0.949653	0.634856	-0.0577663	-189.606	10050000	10100000
CAMWBO010000002.1	202	0.302092	0.289873	1.02707	0.686614	0.0122189	40.1058	10100000	10150000
CAMWBO010000002.1	203	0.18302	0.114508	2.12185	1.41848	0.068512	224.876	10150000	10200000
CAMWBO010000002.1	204	0.113475	0.0998274	1.60131	1.0705	0.0136474	44.7947	10200000	10250000
CAMWBO010000002.1	205	0.369705	0.149148	4.17134	2.7886	0.220557	723.932	10250000	10270000
CAMWBO010000003.1	0	1.36115	1.44768	0.944099	0.631143	-0.0865298	-284.015	0	50000
CAMWBO010000003.1	1	0.858015	0.932264	0.977213	0.65328	-0.0742491	-243.707	50000	100000
CAMWBO010000003.1	2	0.587894	0.711814	0.850399	0.568503	-0.12392	-406.742	100000	150000
CAMWBO010000003.1	3	1.03995	1.13564	0.95683	0.639654	-0.0956884	-314.076	150000	200000
CAMWBO010000003.1	4	0.849176	0.541785	6.04279	4.03968	0.307391	1008.94	200000	250000
CAMWBO010000003.1	5	0.988458	0.714069	1.46397	0.978683	0.274389	900.622	250000	300000
CAMWBO010000003.1	6	0.997313	0.72837	1.47785	0.987963	0.268944	882.75	300000	350000
CAMWBO010000003.1	7	1.00388	0.905237	1.10969	0.741844	0.0986478	323.79	350000	400000
CAMWBO010000003.1	8	0.883607	0.791867	1.17245	0.783797	0.0917402	301.117	400000	450000
CAMWBO010000003.1	9	0.507745	0.430884	1.13774	0.760592	0.076861	252.28	450000	500000
CAMWBO010000003.1	10	0.861519	0.86176	1.90857	1.2759	-0.000241153	-0.791534	500000	550000
CAMWBO010000003.1	11	0.898391	1.0268	0.996414	0.666116	-0.128411	-421.483	550000	600000
CAMWBO010000003.1	12	0.552906	0.403756	1.43538	0.95957	0.14915	489.552	600000	650000
CAMWBO010000003.1	13	0.518785	0.534358	1.02078	0.682405	-0.0155724	-51.1132	650000	700000
CAMWBO010000003.1	14	0.207984	0.267379	0.837824	0.560096	-0.0593951	-194.952	700000	750000
CAMWBO010000003.1	15	0.437925	0.476806	1.39102	0.929916	-0.0388807	-127.618	750000	800000
CAMWBO010000003.1	16	0.576955	0.650385	1.14151	0.763114	-0.0734299	-241.018	800000	850000
CAMWBO010000003.1	17	0.292593	0.385822	0.955946	0.639063	-0.0932294	-306.005	850000	900000
CAMWBO010000003.1	18	0.497395	0.38784	1.50632	1.00699	0.109555	359.591	900000	950000
CAMWBO010000003.1	19	0.52075	0.334713	1.60899	1.07563	0.186037	610.626	950000	1000000
CAMWBO010000003.1	20	0.41726	0.200952	3.96918	2.65345	0.216309	709.986	1000000	1050000
CAMWBO010000003.1	21	0.361169	0.201316	3.65221	2.44155	0.159853	524.683	1050000	1100000
CAMWBO010000003.1	22	0.289636	0.481859	0.811466	0.542476	-0.192224	-630.932	1100000	1150000
CAMWBO010000003.1	23	0.152866	0.214562	0.87242	0.583225	-0.0616955	-202.502	1150000	1200000
CAMWBO010000003.1	24	0.342302	0.232644	2.55052	1.70506	0.109658	359.928	1200000	1250000
CAMWBO010000003.1	25	0.481256	0.177478	5.54898	3.70957	0.303778	997.086	1250000	1300000
CAMWBO010000003.1	26	0.248794	0.161625	1.51908	1.01553	0.0871686	286.112	1300000	1350000
CAMWBO010000003.1	27	0.215152	0.24982	0.841695	0.562685	-0.0346685	-113.792	1350000	1400000
CAMWBO010000003.1	28	0.253234	0.273914	1.03674	0.693075	-0.0206802	-67.8783	1400000	1450000
CAMWBO010000003.1	29	0.2127	0.188979	1.47548	0.986377	0.0237213	77.8602	1450000	1500000
CAMWBO010000003.1	30	0.109945	0.0846861	1.22926	0.821775	0.0252584	82.9053	1500000	1550000
CAMWBO010000003.1	31	0.168992	0.117228	1.95034	1.30383	0.0517637	169.903	1550000	1600000
CAMWBO010000003.1	32	0.55678	0.579306	0.888273	0.593822	-0.0225265	-73.9382	1600000	1650000
CAMWBO010000003.1	33	0.421396	0.470885	0.685032	0.457953	-0.0494893	-162.438	1650000	1700000
CAMWBO010000003.1	34	0.71073	0.815828	0.84073	0.56204	-0.105097	-344.959	1700000	1750000
CAMWBO010000003.1	35	0.350162	0.636011	0.675526	0.451598	-0.285849	-938.239	1750000	1800000
CAMWBO010000003.1	36	0.914689	1.12713	0.813774	0.544019	-0.21244	-697.29	1800000	1850000
CAMWBO010000003.1	37	0.653896	0.677302	1.02437	0.684804	-0.0234059	-76.825	1850000	1900000
CAMWBO010000003.1	38	1.08186	0.866545	1.36964	0.915624	0.215318	706.735	1900000	1950000
CAMWBO010000003.1	39	1.06481	0.76637	2.84949	1.90492	0.298444	979.578	1950000	2000000
CAMWBO010000003.1	40	0.816316	0.29407	18.1755	12.1505	0.522246	1714.16	2000000	2050000
CAMWBO010000003.1	41	0.882956	0.881531	1.0445	0.698261	0.00142456	4.67581	2050000	2100000
CAMWBO010000003.1	42	0.945171	0.844882	1.12769	0.753876	0.100289	329.177	2100000	2150000
CAMWBO010000003.1	43	0.397653	0.400466	1.06713	0.713388	-0.00281318	-9.23367	2150000	2200000
CAMWBO010000003.1	44	0.140907	0.113113	1.48437	0.992319	0.0277943	91.2288	2200000	2250000
CAMWBO010000003.1	45	0.290068	0.202807	1.23536	0.825853	0.0872612	286.416	2250000	2300000
CAMWBO010000003.1	46	0.691929	0.673308	1.06503	0.711987	0.0186212	61.1201	2300000	2350000
CAMWBO010000003.1	47	1.04852	1.01981	1.07602	0.719332	0.0287059	94.221	2350000	2400000
CAMWBO010000003.1	48	0.786983	0.673588	1.28301	0.857707	0.113394	372.193	2400000	2450000
CAMWBO010000003.1	49	0.498629	0.493524	1.18258	0.790571	0.00510474	16.7552	2450000	2500000
CAMWBO010000003.1	50	0.198645	0.288709	0.662219	0.442702	-0.0900639	-295.616	2500000	2550000
CAMWBO010000003.1	51	0.199582	0.0842493	3.56467	2.38303	0.115333	378.556	2550000	2600000
CAMWBO010000003.1	52	0.507485	0.583757	0.763389	0.510336	-0.0762723	-250.347	2600000	2650000
CAMWBO010000003.1	53	0.630972	0.540274	1.36884	0.915091	0.0906989	297.7	2650000	2700000
CAMWBO010000003.1	54	0.872847	0.428651	3.7965	2.53801	0.444197	1457.98	2700000	2750000
CAMWBO010000003.1	55	1.13197	0.784894	1.52461	1.01922	0.347075	1139.2	2750000	2800000
CAMWBO010000003.1	56	0.516006	0.342044	2.02396	1.35304	0.173962	570.994	2800000	2850000
CAMWBO010000003.1	57	0.85832	0.622741	1.66676	1.11425	0.235579	773.239	2850000	2900000
CAMWBO010000003.1	58	1.22256	1.04225	1.25598	0.83964	0.180314	591.842	2900000	2950000
CAMWBO010000003.1	59	0.939684	0.819663	1.26218	0.843785	0.120021	393.943	2950000	3000000
CAMWBO010000003.1	60	0.338266	0.359454	1.26062	0.84274	-0.0211872	-69.5424	3000000	3050000
CAMWBO010000003.1	61	0.416296	0.434446	1.06987	0.715219	-0.0181496	-59.572	3050000	3100000
CAMWBO010000003.1	62	1.00736	0.992929	1.06732	0.713517	0.0144312	47.3674	3100000	3150000
CAMWBO010000003.1	63	0.467544	0.520285	1.26908	0.848395	-0.0527415	-173.112	3150000	3200000
CAMWBO010000003.1	64	0.432851	0.407807	1.25155	0.83668	0.0250441	82.2017	3200000	3250000
CAMWBO010000003.1	65	0.911476	1.16577	0.726212	0.485482	-0.25429	-834.651	3250000	3300000
CAMWBO010000003.1	66	1.13091	1.22834	0.948303	0.633954	-0.0974333	-319.804	3300000	3350000
CAMWBO010000003.1	67	0.800514	1.18838	0.671583	0.448963	-0.387869	-1273.1	3350000	3400000
CAMWBO010000003.1	68	1.48775	1.81065	0.825038	0.551549	-0.3229	-1059.85	3400000	3450000
CAMWBO010000003.1	69	1.37838	1.47184	0.973515	0.650808	-0.0934563	-306.75	3450000	3500000
CAMWBO010000003.1	70	1.0555	1.76829	0.620774	0.414996	-0.712784	-2339.56	3500000	3550000
CAMWBO010000003.1	71	1.31672	1.66201	0.811758	0.542671	-0.345298	-1133.37	3550000	3600000
CAMWBO010000003.1	72	1.31565	1.87717	0.65501	0.437883	-0.561513	-1843.05	3600000	3650000
CAMWBO010000003.1	73	1.59684	2.07864	0.770936	0.515381	-0.481799	-1581.4	3650000	3700000
CAMWBO010000003.1	74	1.43659	1.46268	1.01527	0.67872	-0.0260847	-85.6173	3700000	3750000
CAMWBO010000003.1	75	1.51655	1.48894	1.06223	0.710114	0.027604	90.6042	3750000	3800000
CAMWBO010000003.1	76	1.37362	1.5476	0.99696	0.666481	-0.173982	-571.059	3800000	3850000
CAMWBO010000003.1	77	1.02499	0.653105	1.58818	1.06172	0.371881	1220.62	3850000	3900000
CAMWBO010000003.1	78	0.902004	0.615845	1.47868	0.988519	0.286159	939.254	3900000	3950000
CAMWBO010000003.1	79	0.96794	0.664053	1.46798	0.981365	0.303887	997.444	3950000	4000000
CAMWBO010000003.1	80	1.47643	1.24211	1.25639	0.839912	0.234321	769.109	4000000	4050000
CAMWBO010000003.1	81	1.98498	2.19393	0.906318	0.605886	-0.20895	-685.835	4050000	4100000
CAMWBO010000003.1	82	2.07029	2.45346	0.849269	0.567748	-0.383169	-1257.67	4100000	4150000
CAMWBO010000003.1	83	2.07071	2.39224	0.865783	0.578788	-0.321522	-1055.33	4150000	4200000
CAMWBO010000003.1	84	1.99581	2.06107	0.983114	0.657225	-0.0652507	-214.171	4200000	4250000
CAMWBO010000003.1	85	1.62875	1.60249	1.02325	0.684057	0.0262649	86.2088	4250000	4300000
CAMWBO010000003.1	86	1.4164	1.41953	1.00424	0.671346	-0.00312943	-10.2717	4300000	4350000
CAMWBO010000003.1	87	1.34043	1.55364	0.86665	0.579368	-0.213204	-699.796	4350000	4400000
CAMWBO010000003.1	88	1.46096	1.50543	0.986218	0.6593	-0.0444686	-145.959	4400000	4450000
CAMWBO010000003.1	89	1.48566	1.51274	1.30909	0.875146	-0.0270787	-88.8801	4450000	4500000
CAMWBO010000003.1	90	1.39628	1.60445	0.872548	0.58331	-0.208165	-683.257	4500000	4550000
CAMWBO010000003.1	91	1.41484	1.45196	0.979212	0.654616	-0.0371249	-121.855	4550000	4600000
CAMWBO010000003.1	92	1.29411	1.33712	1.0164	0.67948	-0.0430158	-141.19	4600000	4650000
CAMWBO010000003.1	93	1.37934	1.40783	0.998764	0.667687	-0.0284945	-93.5271	4650000	4700000
CAMWBO010000003.1	94	1.04921	1.05452	1.00842	0.674143	-0.00530861	-17.4244	4700000	4750000
CAMWBO010000003.1	95	0.909151	0.89777	1.07085	0.715878	0.0113807	37.3548	4750000	4800000
CAMWBO010000003.1	96	1.19772	1.20589	1.04004	0.69528	-0.00817001	-26.8163	4800000	4850000
CAMWBO010000003.1	97	0.958648	0.900689	1.10981	0.741925	0.057959	190.238	4850000	4900000
CAMWBO010000003.1	98	1.4829	1.61887	0.923529	0.617392	-0.135977	-446.315	4900000	4950000
CAMWBO010000003.1	99	1.5666	1.54962	1.01301	0.67721	0.0169755	55.7183	4950000	5000000
CAMWBO010000003.1	100	1.6722	1.82264	0.918329	0.613916	-0.150439	-493.785	5000000	5050000
CAMWBO010000003.1	101	2.03839	2.2356	0.918685	0.614153	-0.197211	-647.303	5050000	5100000
CAMWBO010000003.1	102	1.3168	1.12934	1.20111	0.802957	0.187452	615.269	5100000	5150000
CAMWBO010000003.1	103	0.818622	0.819974	1.00517	0.671967	-0.00135192	-4.43739	5150000	5200000
CAMWBO010000003.1	104	0.836078	0.672468	1.39426	0.932085	0.16361	537.014	5200000	5250000
CAMWBO010000003.1	105	0.827961	0.65893	1.25271	0.83745	0.169031	554.807	5250000	5300000
CAMWBO010000003.1	106	0.769411	1.1661	0.583302	0.389945	-0.396688	-1302.04	5300000	5350000
CAMWBO010000003.1	107	0.686871	0.828591	0.780041	0.521468	-0.14172	-465.164	5350000	5400000
CAMWBO010000003.1	108	0.476619	0.579596	0.786085	0.525508	-0.102977	-338	5400000	5450000
CAMWBO010000003.1	109	0.388646	0.562316	0.700552	0.468328	-0.17367	-570.034	5450000	5500000
CAMWBO010000003.1	110	0.682544	0.450889	1.48451	0.992415	0.231655	760.356	5500000	5550000
CAMWBO010000003.1	111	0.61642	0.590692	1.07842	0.720936	0.0257281	84.4471	5550000	5600000
CAMWBO010000003.1	112	1.2367	0.940788	1.43245	0.957609	0.295913	971.27	5600000	5650000
CAMWBO010000003.1	113	0.755084	0.892714	0.823959	0.550828	-0.13763	-451.741	5650000	5700000
CAMWBO010000003.1	114	0.768732	0.92162	0.82487	0.551437	-0.152888	-501.822	5700000	5750000
CAMWBO010000003.1	115	0.408646	0.575758	0.707718	0.473119	-0.167112	-548.51	5750000	5800000
CAMWBO010000003.1	116	0.273209	0.701328	0.32684	0.218497	-0.428119	-1405.21	5800000	5850000
CAMWBO010000003.1	117	0.206743	0.499271	0.387151	0.258816	-0.292528	-960.162	5850000	5900000
CAMWBO010000003.1	118	0.335135	0.677029	0.47412	0.316956	-0.341894	-1122.19	5900000	5950000
CAMWBO010000003.1	119	0.717995	1.05283	0.658546	0.440247	-0.334833	-1099.02	5950000	6000000
CAMWBO010000003.1	120	0.924021	0.898994	0.993132	0.663922	0.0250273	82.1466	6000000	6050000
CAMWBO010000003.1	121	0.596011	0.966113	0.62408	0.417206	-0.370102	-1214.78	6050000	6100000
CAMWBO010000003.1	122	0.133213	0.520904	0.224063	0.149789	-0.387691	-1272.51	6100000	6150000
CAMWBO010000003.1	123	0.56221	0.846898	0.647126	0.432613	-0.284689	-934.43	6150000	6200000
CAMWBO010000003.1	124	1.00239	1.27113	0.800171	0.534925	-0.268743	-882.092	6200000	6250000
CAMWBO010000003.1	125	1.0271	1.04876	0.981638	0.656238	-0.0216517	-71.067	6250000	6300000
CAMWBO010000003.1	126	1.34763	1.08062	1.25174	0.836808	0.267007	876.392	6300000	6350000
CAMWBO010000003.1	127	0.829977	0.939544	0.959339	0.641331	-0.109567	-359.631	6350000	6400000
CAMWBO010000003.1	128	0.603086	0.842507	0.717561	0.479699	-0.239421	-785.848	6400000	6450000
CAMWBO010000003.1	129	0.690035	0.916985	0.728456	0.486983	-0.22695	-744.914	6450000	6500000
CAMWBO010000003.1	130	0.892164	0.999874	0.9027	0.603468	-0.10771	-353.536	6500000	6550000
CAMWBO010000003.1	131	1.21235	1.16556	1.04518	0.698714	0.0467865	153.567	6550000	6600000
CAMWBO010000003.1	132	0.520461	0.571921	0.859902	0.574856	-0.0514598	-168.906	6600000	6650000
CAMWBO010000003.1	133	1.15637	0.916161	1.20168	0.803339	0.24021	788.438	6650000	6700000
CAMWBO010000003.1	134	0.886862	0.979961	0.967789	0.64698	-0.0930987	-305.576	6700000	6750000
CAMWBO010000003.1	135	1.2128	1.44619	0.826937	0.552819	-0.233393	-766.064	6750000	6800000
CAMWBO010000003.1	136	1.30864	1.22128	1.16887	0.781408	0.0873589	286.737	6800000	6850000
CAMWBO010000003.1	137	0.787619	0.66167	2.88972	1.93182	0.125949	413.4	6850000	6900000
CAMWBO010000003.1	138	0.960873	0.840804	1.40404	0.938623	0.120068	394.099	6900000	6950000
CAMWBO010000003.1	139	0.788103	0.658821	1.28489	0.858967	0.129282	424.34	6950000	7000000
CAMWBO010000003.1	140	1.09341	0.874819	1.38835	0.928133	0.218586	717.462	7000000	7050000
CAMWBO010000003.1	141	0.643466	0.541625	0.644621	0.430938	0.101841	334.27	7050000	7100000
CAMWBO010000003.1	142	1.36297	1.48985	0.942438	0.630032	-0.126885	-416.473	7100000	7150000
CAMWBO010000003.1	143	1.07972	0.808853	1.41935	0.948857	0.270868	889.068	7150000	7200000
CAMWBO010000003.1	144	0.878991	0.93431	1.09644	0.732985	-0.0553195	-181.574	7200000	7250000
CAMWBO010000003.1	145	1.01088	1.15601	0.895924	0.598938	-0.145126	-476.346	7250000	7300000
CAMWBO010000003.1	146	1.51409	1.42275	1.07349	0.717645	0.0913372	299.795	7300000	7350000
CAMWBO010000003.1	147	1.76872	1.75982	1.0044	0.671454	0.00890042	29.2137	7350000	7400000
CAMWBO010000003.1	148	1.03106	1.12551	0.966583	0.646174	-0.0944434	-309.99	7400000	7450000
CAMWBO010000003.1	149	1.70505	1.75721	0.999349	0.668078	-0.0521538	-171.184	7450000	7500000
CAMWBO010000003.1	150	0.236188	0.247739	0.86112	0.57567	-0.0115505	-37.9119	7500000	7550000
CAMWBO010000003.1	151	1.55891	1.68452	0.963882	0.644368	-0.12561	-412.288	7550000	7600000
CAMWBO010000003.1	152	1.71135	1.65021	1.10483	0.738591	0.0611476	200.704	7600000	7650000
CAMWBO010000003.1	153	1.48416	1.50768	0.978449	0.654106	-0.0235292	-77.2295	7650000	7700000
CAMWBO010000003.1	154	0.957366	1.08467	1.10548	0.73903	-0.127306	-417.853	7700000	7750000
CAMWBO010000003.1	155	1.59931	1.68202	0.958076	0.640487	-0.0827092	-271.475	7750000	7800000
CAMWBO010000003.1	156	1.2665	1.45172	0.865785	0.578789	-0.185221	-607.948	7800000	7850000
CAMWBO010000003.1	157	1.2959	1.57115	0.824889	0.55145	-0.27525	-903.449	7850000	7900000
CAMWBO010000003.1	158	1.58319	1.65713	0.96235	0.643344	-0.0739391	-242.689	7900000	7950000
CAMWBO010000003.1	159	1.27099	1.16271	1.1624	0.777078	0.108281	355.409	7950000	8000000
CAMWBO010000003.1	160	1.39333	1.46637	1.02206	0.683262	-0.073042	-239.745	8000000	8050000
CAMWBO010000003.1	161	1.17978	1.5152	0.777986	0.520094	-0.335426	-1100.97	8050000	8100000
CAMWBO010000003.1	162	0.683811	0.888949	0.737518	0.493041	-0.205139	-673.324	8100000	8150000
CAMWBO010000003.1	163	1.06948	1.32443	0.814607	0.544576	-0.254945	-836.802	8150000	8200000
CAMWBO010000003.1	164	0.883614	0.957017	0.887942	0.593601	-0.0734027	-240.928	8200000	8250000
CAMWBO010000003.1	165	0.949282	1.00781	0.901672	0.60278	-0.0585293	-192.11	8250000	8300000
CAMWBO010000003.1	166	1.58338	1.51663	1.0657	0.712435	0.066748	219.086	8300000	8350000
CAMWBO010000003.1	167	0.800951	0.678859	1.495	0.999426	0.122092	400.742	8350000	8400000
CAMWBO010000003.1	168	0.254021	0.277093	0.942454	0.630043	-0.0230727	-75.7311	8400000	8450000
CAMWBO010000003.1	169	0.542869	0.701589	0.831274	0.555718	-0.15872	-520.964	8450000	8500000
CAMWBO010000003.1	170	1.22484	1.21443	1.01982	0.681762	0.0104156	34.1869	8500000	8550000
CAMWBO010000003.1	171	1.4693	1.45796	1.02491	0.685167	0.0113397	37.2202	8550000	8600000
CAMWBO010000003.1	172	1.35233	1.35652	1.0043	0.671391	-0.00418161	-13.7252	8600000	8650000
CAMWBO010000003.1	173	1.02293	1.14911	0.750569	0.501765	-0.126187	-414.182	8650000	8700000
CAMWBO010000003.1	174	1.17957	1.15973	1.06746	0.713613	0.0198386	65.116	8700000	8750000
CAMWBO010000003.1	175	0.804937	0.825477	1.02643	0.686183	-0.0205403	-67.419	8750000	8800000
CAMWBO010000003.1	176	0.911002	1.19147	0.780651	0.521876	-0.28047	-920.582	8800000	8850000
CAMWBO010000003.1	177	1.207	1.14416	1.02773	0.687049	0.0628434	206.27	8850000	8900000
CAMWBO010000003.1	178	1.2923	1.35783	0.962596	0.643508	-0.0655325	-215.096	8900000	8950000
CAMWBO010000003.1	179	1.0595	1.09418	0.955812	0.638973	-0.0346801	-113.83	8950000	9000000
CAMWBO010000003.1	180	1.50543	1.67242	0.909502	0.608015	-0.166993	-548.118	9000000	9035000
CAMWBO010000004.1	0	1.66172	1.26699	2.69338	1.80056	0.394729	1295.61	0	50000
CAMWBO010000004.1	1	1.74357	1.44004	1.60711	1.07437	0.30353	996.273	50000	100000
CAMWBO010000004.1	2	1.82213	1.58318	1.15755	0.773838	0.238942	784.276	100000	150000
CAMWBO010000004.1	3	1.74035	1.49898	1.17327	0.784348	0.241366	792.231	150000	200000
CAMWBO010000004.1	4	1.108	0.994664	1.30922	0.875234	0.113339	372.01	200000	250000
CAMWBO010000004.1	5	1.13917	1.02929	1.13266	0.757196	0.109888	360.683	250000	300000
CAMWBO010000004.1	6	1.19961	1.03732	1.16088	0.776065	0.162288	532.675	300000	350000
CAMWBO010000004.1	7	0.893996	0.92627	1.00848	0.674185	-0.0322735	-105.931	350000	400000
CAMWBO010000004.1	8	1.60086	1.55823	1.07094	0.71594	0.0426328	139.933	400000	450000
CAMWBO010000004.1	9	1.17853	1.27281	0.92854	0.620741	-0.0942815	-309.459	450000	500000
CAMWBO010000004.1	10	0.914774	1.093	0.851274	0.569088	-0.178223	-584.978	500000	550000
CAMWBO010000004.1	11	1.66455	1.69218	1.03771	0.693726	-0.0276252	-90.6736	550000	600000
CAMWBO010000004.1	12	1.60642	1.32998	1.21609	0.812972	0.276439	907.35	600000	650000
CAMWBO010000004.1	13	1.5409	1.34058	1.16258	0.777198	0.200328	657.535	650000	700000
CAMWBO010000004.1	14	1.06839	1.16714	0.938002	0.627067	-0.0987485	-324.121	700000	750000
CAMWBO010000004.1	15	0.830901	0.989755	0.919012	0.614372	-0.158854	-521.403	750000	800000
CAMWBO010000004.1	16	1.00177	1.27934	0.778813	0.520647	-0.277566	-911.051	800000	850000
CAMWBO010000004.1	17	0.795685	0.857182	0.810262	0.541671	-0.0614968	-201.85	850000	900000
CAMWBO010000004.1	18	1.27652	1.2758	1.03491	0.691854	0.000722516	2.3715	900000	950000
CAMWBO010000004.1	19	1.26734	1.28143	0.956485	0.639423	-0.0140903	-46.2483	950000	1000000
CAMWBO010000004.1	20	1.65288	1.58411	1.05116	0.702716	0.0687762	225.743	1000000	1050000
CAMWBO010000004.1	21	1.66932	1.64003	1.04452	0.698275	0.029297	96.161	1050000	1100000
CAMWBO010000004.1	22	1.42861	1.40771	1.09404	0.731382	0.0208992	68.597	1100000	1150000
CAMWBO010000004.1	23	1.65401	1.9835	0.83435	0.557774	-0.329494	-1081.49	1150000	1200000
CAMWBO010000004.1	24	2.10719	2.30056	0.915299	0.61189	-0.193378	-634.721	1200000	1250000
CAMWBO010000004.1	25	1.86268	2.05317	0.922052	0.616405	-0.190495	-625.258	1250000	1300000
CAMWBO010000004.1	26	1.55123	1.69205	1.00001	0.668521	-0.140816	-462.198	1300000	1350000
CAMWBO010000004.1	27	1.60594	1.42204	1.24019	0.829086	0.183895	603.597	1350000	1400000
CAMWBO010000004.1	28	1.17047	1.10928	1.16333	0.777702	0.0611957	200.862	1400000	1450000
CAMWBO010000004.1	29	0.837939	0.803511	1.1179	0.747329	0.0344288	113.005	1450000	1500000
CAMWBO010000004.1	30	1.22494	1.26574	0.967027	0.646471	-0.0408007	-133.92	1500000	1550000
CAMWBO010000004.1	31	1.448	1.68975	0.838594	0.560611	-0.241757	-793.515	1550000	1600000
CAMWBO010000004.1	32	0.712128	1.23122	0.562718	0.376185	-0.519093	-1703.81	1600000	1650000
CAMWBO010000004.1	33	1.37503	1.38259	1.02546	0.685534	-0.00756023	-24.8148	1650000	1700000
CAMWBO010000004.1	34	1.20738	1.51667	0.762	0.509408	-0.309293	-1015.19	1700000	1750000
CAMWBO010000004.1	35	1.46656	1.60713	0.90219	0.603126	-0.140571	-461.395	1750000	1800000
CAMWBO010000004.1	36	1.68266	1.7013	1.04423	0.698082	-0.018644	-61.195	1800000	1850000
CAMWBO010000004.1	37	1.71155	1.96972	0.866816	0.579478	-0.258167	-847.379	1850000	1900000
CAMWBO010000004.1	38	1.5913	1.69382	0.940557	0.628775	-0.102527	-336.524	1900000	1950000
CAMWBO010000004.1	39	2.13156	1.90419	1.13008	0.755472	0.227372	746.301	1950000	2000000
CAMWBO010000004.1	40	0.997399	0.947779	1.11638	0.746318	0.0496201	162.867	2000000	2050000
CAMWBO010000004.1	41	0.786375	0.886036	0.904507	0.604675	-0.0996616	-327.118	2050000	2100000
CAMWBO010000004.1	42	0.751577	0.825489	1.6221	1.0844	-0.0739114	-242.598	2100000	2150000
CAMWBO010000004.1	43	1.29671	1.34883	0.978813	0.65435	-0.0521205	-171.074	2150000	2200000
CAMWBO010000004.1	44	1.00245	0.585386	1.876	1.25413	0.417061	1368.91	2200000	2250000
CAMWBO010000004.1	45	0.752483	0.676583	1.28332	0.857917	0.0759005	249.127	2250000	2300000
CAMWBO010000004.1	46	1.03674	0.942448	1.38619	0.926685	0.0942953	309.504	2300000	2350000
CAMWBO010000004.1	47	1.54371	1.40908	1.09028	0.728869	0.134634	441.908	2350000	2400000
CAMWBO010000004.1	48	1.02196	0.873117	1.31712	0.88051	0.148848	488.56	2400000	2450000
CAMWBO010000004.1	49	0.583932	0.607589	0.975007	0.651806	-0.0236569	-77.6487	2450000	2500000
CAMWBO010000004.1	50	1.3212	1.1191	1.1783	0.787707	0.202096	663.336	2500000	2550000
CAMWBO010000004.1	51	0.999102	1.13963	0.902748	0.603499	-0.140529	-461.255	2550000	2600000
CAMWBO010000004.1	52	0.854666	0.957257	0.980525	0.655495	-0.102591	-336.734	2600000	2650000
CAMWBO010000004.1	53	0.632756	0.650498	1.23861	0.828025	-0.0177424	-58.2355	2650000	2700000
CAMWBO010000004.1	54	0.576974	0.692763	0.618101	0.413209	-0.115789	-380.052	2700000	2750000
CAMWBO010000004.1	55	1.21318	1.21605	1.02466	0.684997	-0.00286634	-9.40813	2750000	2800000
CAMWBO010000004.1	56	1.20035	1.31288	0.931801	0.622921	-0.112534	-369.369	2800000	2850000
CAMWBO010000004.1	57	0.759515	1.45281	0.518698	0.346757	-0.693299	-2275.61	2850000	2900000
CAMWBO010000004.1	58	1.32076	1.59894	0.821338	0.549075	-0.278174	-913.048	2900000	2950000
CAMWBO010000004.1	59	1.1965	1.66479	0.710274	0.474828	-0.468289	-1537.06	2950000	3000000
CAMWBO010000004.1	60	0.655139	0.91623	0.610871	0.408376	-0.261091	-856.975	3000000	3050000
CAMWBO010000004.1	61	0.643805	0.960688	0.616191	0.411932	-0.316883	-1040.1	3050000	3100000
CAMWBO010000004.1	62	0.789227	1.12302	0.712095	0.476046	-0.333793	-1095.6	3100000	3150000
CAMWBO010000004.1	63	1.10622	1.33731	0.812	0.542833	-0.23109	-758.502	3150000	3200000
CAMWBO010000004.1	64	1.31421	1.61836	0.820419	0.548462	-0.304153	-998.315	3200000	3250000
CAMWBO010000004.1	65	1.31229	1.51204	0.853261	0.570417	-0.199748	-655.631	3250000	3300000
CAMWBO010000004.1	66	1.34824	1.46968	0.973892	0.65106	-0.121439	-398.596	3300000	3350000
CAMWBO010000004.1	67	0.579165	0.975253	0.556118	0.371772	-0.396087	-1300.07	3350000	3400000
CAMWBO010000004.1	68	0.891373	1.04536	0.860559	0.575295	-0.153991	-505.442	3400000	3450000
CAMWBO010000004.1	69	1.22272	1.16425	1.06308	0.710687	0.0584638	191.895	3450000	3500000
CAMWBO010000004.1	70	1.40512	1.45651	0.966482	0.646106	-0.0513865	-168.665	3500000	3550000
CAMWBO010000004.1	71	1.03988	1.03916	1.05301	0.703954	0.000720555	2.36507	3550000	3600000
CAMWBO010000004.1	72	1.18654	1.18919	1.03125	0.689406	-0.00264746	-8.68972	3600000	3650000
CAMWBO010000004.1	73	1.75168	1.56977	1.11973	0.748555	0.18191	597.08	3650000	3700000
CAMWBO010000004.1	74	1.10907	0.993115	1.10918	0.7415	0.115958	380.608	3700000	3750000
CAMWBO010000004.1	75	0.674742	0.554635	1.23636	0.826521	0.120107	394.225	3750000	3800000
CAMWBO010000004.1	76	1.65594	1.67667	0.987602	0.660226	-0.0207337	-68.0538	3800000	3850000
CAMWBO010000004.1	77	1.41281	1.31036	1.11202	0.743399	0.102447	336.26	3850000	3900000
CAMWBO010000004.1	78	0.672976	0.951801	0.676528	0.452268	-0.278825	-915.182	3900000	3950000
CAMWBO010000004.1	79	1.13868	1.24689	0.960132	0.641861	-0.108206	-355.163	3950000	4000000
CAMWBO010000004.1	80	1.68593	1.73059	0.991296	0.662695	-0.0446593	-146.585	4000000	4050000
CAMWBO010000004.1	81	1.69232	1.55727	1.0854	0.725603	0.135049	443.268	4050000	4100000
CAMWBO010000004.1	82	1.57306	1.53097	1.03019	0.688696	0.0420926	138.16	4100000	4150000
CAMWBO010000004.1	83	1.8549	1.90811	0.975039	0.651827	-0.0532108	-174.653	4150000	4200000
CAMWBO010000004.1	84	1.88644	1.93338	0.979264	0.654651	-0.0469436	-154.082	4200000	4250000
CAMWBO010000004.1	85	1.62357	1.74131	0.933287	0.623915	-0.11774	-386.457	4250000	4300000
CAMWBO010000004.1	86	1.81249	1.72457	1.05621	0.706093	0.0879191	288.575	4300000	4350000
CAMWBO010000004.1	87	1.34918	1.39539	0.967671	0.646901	-0.0462088	-151.671	4350000	4400000
CAMWBO010000004.1	88	1.21063	1.18334	1.04133	0.696145	0.0272903	89.5745	4400000	4450000
CAMWBO010000004.1	89	1.45577	1.30551	1.13686	0.760003	0.150263	493.207	4450000	4500000
CAMWBO010000004.1	90	1.42659	1.23975	1.16128	0.776329	0.186839	613.26	4500000	4550000
CAMWBO010000004.1	91	1.27157	1.17115	1.09813	0.734115	0.10042	329.606	4550000	4600000
CAMWBO010000004.1	92	1.24493	1.19001	1.05999	0.708621	0.0549262	180.283	4600000	4650000
CAMWBO010000004.1	93	1.24822	1.25262	1.04753	0.70029	-0.00439797	-14.4354	4650000	4700000
CAMWBO010000004.1	94	1.35906	1.37751	1.00298	0.670503	-0.0184492	-60.5554	4700000	4750000
CAMWBO010000004.1	95	1.42753	1.37791	1.04473	0.698416	0.0496152	162.851	4750000	4800000
CAMWBO010000004.1	96	1.5812	1.49543	1.06337	0.710877	0.0857695	281.52	4800000	4850000
CAMWBO010000004.1	97	1.75045	1.55881	1.12725	0.75358	0.191637	629.007	4850000	4900000
CAMWBO010000004.1	98	1.59631	1.38225	1.17631	0.786381	0.214056	702.592	4900000	4950000
CAMWBO010000004.1	99	2.02485	1.95682	1.04053	0.695611	0.0680224	223.269	4950000	5000000
CAMWBO010000004.1	100	1.57864	1.47964	1.06707	0.713353	0.0990027	324.955	5000000	5050000
CAMWBO010000004.1	101	1.43735	1.26288	1.13708	0.760152	0.174469	572.658	5050000	5100000
CAMWBO010000004.1	102	1.33934	1.20775	1.11413	0.74481	0.131583	431.893	5100000	5150000
CAMWBO010000004.1	103	1.12945	0.968778	1.19346	0.797842	0.160675	527.382	5150000	5200000
CAMWBO010000004.1	104	1.20428	1.03317	1.16901	0.781502	0.171106	561.619	5200000	5250000
CAMWBO010000004.1	105	1.18729	1.06841	1.11724	0.74689	0.118876	390.185	5250000	5300000
CAMWBO010000004.1	106	0.942482	0.774808	1.28126	0.85654	0.167674	550.354	5300000	5350000
CAMWBO010000004.1	107	0.659291	0.464109	1.68469	1.12624	0.195182	640.642	5350000	5400000
CAMWBO010000004.1	108	1.00392	0.783556	1.35449	0.905494	0.220368	723.31	5400000	5450000
CAMWBO010000004.1	109	1.24629	1.12235	1.11403	0.744743	0.12394	406.805	5450000	5500000
CAMWBO010000004.1	110	1.16197	1.10307	1.05457	0.704997	0.0589035	193.338	5500000	5550000
CAMWBO010000004.1	111	0.997172	0.94525	1.08229	0.723526	0.0519217	170.422	5550000	5600000
CAMWBO010000004.1	112	0.708139	0.672655	1.07173	0.716465	0.0354838	116.468	5600000	5650000
CAMWBO010000004.1	113	0.781888	0.759825	1.02087	0.682465	0.0220624	72.415	5650000	5700000
CAMWBO010000004.1	114	1.75894	1.63784	1.08279	0.723862	0.121102	397.49	5700000	5750000
CAMWBO010000004.1	115	2.09044	2.08117	1.00551	0.672194	0.00927825	30.4539	5750000	5800000
CAMWBO010000004.1	116	1.94011	1.92391	1.01153	0.67622	0.0161982	53.1671	5800000	5850000
CAMWBO010000004.1	117	1.83585	1.86003	0.990043	0.661857	-0.0241851	-79.3823	5850000	5900000
CAMWBO010000004.1	118	1.72596	1.85212	0.924877	0.618293	-0.12616	-414.094	5900000	5950000
CAMWBO010000004.1	119	1.90639	1.9745	0.968159	0.647227	-0.0681144	-223.571	5950000	6000000
CAMWBO010000004.1	120	1.82887	1.94406	0.949542	0.634782	-0.11519	-378.086	6000000	6050000
CAMWBO010000004.1	121	1.97558	1.95654	1.01172	0.676346	0.0190473	62.5187	6050000	6100000
CAMWBO010000004.1	122	1.79455	1.75927	1.02629	0.686091	0.0352816	115.804	6100000	6150000
CAMWBO010000004.1	123	1.78325	1.88166	0.958157	0.640541	-0.0984167	-323.032	6150000	6200000
CAMWBO010000004.1	124	1.7436	1.7147	1.02155	0.682919	0.0288952	94.8422	6200000	6250000
CAMWBO010000004.1	125	1.93553	1.89013	1.02879	0.687757	0.0453919	148.989	6250000	6300000
CAMWBO010000004.1	126	1.65913	1.77388	0.93882	0.627614	-0.114746	-376.631	6300000	6350000
CAMWBO010000004.1	127	1.78908	1.64698	1.08964	0.728436	0.142102	466.42	6350000	6400000
CAMWBO010000004.1	128	1.24249	1.16311	1.06567	0.712418	0.0793844	260.562	6400000	6450000
CAMWBO010000004.1	129	0.686407	0.723029	0.958793	0.640966	-0.036622	-120.204	6450000	6500000
CAMWBO010000004.1	130	1.22913	1.21536	1.0095	0.674861	0.0137669	45.187	6500000	6550000
CAMWBO010000004.1	131	0.998183	0.720726	1.70871	1.14229	0.277457	910.693	6550000	6600000
CAMWBO010000004.1	132	0.830068	0.828143	1.43801	0.961327	0.00192481	6.31776	6600000	6650000
CAMWBO010000004.1	133	0.922014	0.949877	1.30228	0.870591	-0.0278633	-91.4552	6650000	6700000
CAMWBO010000004.1	134	0.976749	0.60669	2.32672	1.55544	0.370059	1214.64	6700000	6750000
CAMWBO010000004.1	135	1.04203	0.790509	2.00488	1.34029	0.251524	825.574	6750000	6800000
CAMWBO010000004.1	136	1.25562	1.06723	1.19801	0.800887	0.188394	618.362	6800000	6850000
CAMWBO010000004.1	137	1.08937	1.21721	0.908561	0.607386	-0.127836	-419.596	6850000	6900000
CAMWBO010000004.1	138	1.18877	1.08854	1.08234	0.723562	0.100229	328.981	6900000	6950000
CAMWBO010000004.1	139	1.23505	1.10598	1.12825	0.754251	0.129067	423.635	6950000	7000000
CAMWBO010000004.1	140	1.1847	1.03687	1.15575	0.772634	0.147835	485.235	7000000	7050000
CAMWBO010000004.1	141	1.48864	1.60554	0.914593	0.611418	-0.116904	-383.713	7050000	7100000
CAMWBO010000004.1	142	1.03212	1.298	0.78929	0.527651	-0.265882	-872.7	7100000	7150000
CAMWBO010000004.1	143	1.51353	1.58368	0.874539	0.584641	-0.0701503	-230.253	7150000	7200000
CAMWBO010000004.1	144	1.24141	1.31843	0.931091	0.622447	-0.077017	-252.792	7200000	7250000
CAMWBO010000004.1	145	0.741954	0.755955	0.863649	0.577361	-0.0140009	-45.9551	7250000	7300000
CAMWBO010000004.1	146	0.377741	0.935844	0.423981	0.283437	-0.558103	-1831.85	7300000	7350000
CAMWBO010000004.1	147	1.08436	1.16711	0.929883	0.62164	-0.0827553	-271.626	7350000	7400000
CAMWBO010000004.1	148	0.897242	0.794326	1.18836	0.794431	0.102916	337.8	7400000	7450000
CAMWBO010000004.1	149	0.557326	0.497664	1.08148	0.722981	0.0596625	195.829	7450000	7500000
CAMWBO010000004.1	150	0.860418	0.868502	1.01433	0.678091	-0.00808355	-26.5325	7500000	7550000
CAMWBO010000004.1	151	0.845777	1.17478	0.707329	0.472859	-0.329	-1079.87	7550000	7600000
CAMWBO010000004.1	152	0.93632	0.882135	1.10898	0.741371	0.0541854	177.852	7600000	7650000
CAMWBO010000004.1	153	1.02479	0.895796	1.16448	0.778468	0.128997	423.406	7650000	7700000
CAMWBO010000004.1	154	0.998527	0.897287	1.17035	0.782394	0.10124	332.298	7700000	7750000
CAMWBO010000004.1	155	0.6562	0.682601	0.947971	0.633731	-0.0264013	-86.6567	7750000	7800000
CAMWBO010000004.1	156	1.12602	1.07457	1.07529	0.718843	0.0514475	168.865	7800000	7850000
CAMWBO010000004.1	157	1.49611	1.28214	1.1709	0.782763	0.21397	702.311	7850000	7900000
CAMWBO010000004.1	158	0.630347	0.686543	0.907552	0.606711	-0.0561957	-184.45	7900000	7945000
CAMWBO010000004.1	159	1.29821	1.13663	1.1813	0.789713	0.161583	530.362	7950000	8000000
CAMWBO010000004.1	160	0.980303	0.837039	1.34289	0.89774	0.143264	470.233	8000000	8050000
CAMWBO010000004.1	161	0.990013	0.746468	1.46143	0.976985	0.243545	799.384	8050000	8100000
CAMWBO010000004.1	162	1.36178	1.10164	1.27153	0.850032	0.260131	853.823	8100000	8150000
CAMWBO010000004.1	163	1.29344	0.838355	1.87971	1.25661	0.455088	1493.73	8150000	8200000
CAMWBO010000004.1	164	1.42356	1.02709	1.42043	0.949579	0.396477	1301.35	8200000	8250000
CAMWBO010000004.1	165	1.4087	1.43186	0.988611	0.6609	-0.0231605	-76.0195	8250000	8300000
CAMWBO010000004.1	166	1.53971	1.24958	1.25201	0.836985	0.290124	952.271	8300000	8350000
CAMWBO010000004.1	167	1.5226	1.48479	1.07833	0.720877	0.0378138	124.116	8350000	8400000
CAMWBO010000004.1	168	1.28504	1.30536	1.03106	0.689278	-0.0203208	-66.6987	8400000	8450000
CAMWBO010000004.1	169	0.804812	0.732918	1.28143	0.856655	0.071894	235.977	8450000	8500000
CAMWBO010000004.1	170	1.32833	1.32125	1.03146	0.689543	0.0070852	23.2556	8500000	8550000
CAMWBO010000004.1	171	1.57867	1.56935	1.04149	0.696254	0.00931636	30.579	8550000	8600000
CAMWBO010000004.1	172	1.65165	1.50699	1.09301	0.73069	0.144661	474.819	8600000	8650000
CAMWBO010000004.1	173	1.19976	1.20751	1.38959	0.928962	-0.00774055	-25.4067	8650000	8700000
CAMWBO010000004.1	174	1.46838	1.47977	0.992216	0.66331	-0.0113952	-37.4024	8700000	8750000
CAMWBO010000004.1	175	2.27513	2.15113	1.1343	0.758296	0.123996	406.991	8750000	8795000
CAMWBO010000005.1	0	1.49506	1.32211	1.05686	0.706528	0.172945	567.653	0	50000
CAMWBO010000005.1	1	1.47886	1.2412	1.19844	0.801177	0.237668	780.095	50000	100000
CAMWBO010000005.1	2	1.26142	1.2626	1.07045	0.715608	-0.00117301	-3.85015	100000	150000
CAMWBO010000005.1	3	1.14576	1.2129	0.856004	0.572251	-0.0671355	-220.358	150000	200000
CAMWBO010000005.1	4	1.69314	1.74016	0.981378	0.656064	-0.0470179	-154.326	200000	250000
CAMWBO010000005.1	5	1.39503	1.74636	0.800455	0.535115	-0.351325	-1153.15	250000	300000
CAMWBO010000005.1	6	1.21617	1.41477	0.879611	0.588032	-0.198598	-651.855	300000	350000
CAMWBO010000005.1	7	1.31443	1.55784	0.83358	0.55726	-0.243414	-798.954	350000	400000
CAMWBO010000005.1	8	1.44844	1.56661	0.942808	0.63028	-0.118173	-387.876	400000	450000
CAMWBO010000005.1	9	1.62757	1.48525	1.10985	0.741953	0.142318	467.13	450000	500000
CAMWBO010000005.1	10	1.59098	1.59325	1.05974	0.70845	-0.00227138	-7.4553	500000	550000
CAMWBO010000005.1	11	0.724698	0.796713	1.40091	0.93653	-0.0720148	-236.373	550000	600000
CAMWBO010000005.1	12	0.285015	0.251062	1.0896	0.728413	0.0339523	111.441	600000	650000
CAMWBO010000005.1	13	1.00852	0.891119	1.19652	0.79989	0.117405	385.356	650000	700000
CAMWBO010000005.1	14	1.5087	1.86984	0.815142	0.544934	-0.361141	-1185.37	700000	750000
CAMWBO010000005.1	15	1.47328	1.95475	0.755708	0.505201	-0.48147	-1580.32	750000	800000
CAMWBO010000005.1	16	0.868208	0.895314	0.987293	0.660019	-0.0271059	-88.9693	800000	850000
CAMWBO010000005.1	17	1.18273	1.29685	0.921449	0.616001	-0.114118	-374.569	850000	900000
CAMWBO010000005.1	18	1.06123	1.19592	0.932154	0.623158	-0.134692	-442.097	900000	950000
CAMWBO010000005.1	19	1.2261	1.41846	0.890688	0.595437	-0.19236	-631.381	950000	1000000
CAMWBO010000005.1	20	1.45342	1.5227	0.958926	0.641055	-0.069276	-227.384	1000000	1050000
CAMWBO010000005.1	21	1.08103	1.11795	0.948597	0.63415	-0.0369269	-121.205	1050000	1100000
CAMWBO010000005.1	22	0.821939	0.987884	0.820226	0.548332	-0.165945	-544.679	1100000	1150000
CAMWBO010000005.1	23	1.31319	1.3443	0.963017	0.64379	-0.0311141	-102.125	1150000	1200000
CAMWBO010000005.1	24	0.634698	0.615834	1.02952	0.688245	0.0188634	61.915	1200000	1250000
CAMWBO010000005.1	25	0.244381	0.214953	1.26953	0.8487	0.0294274	96.5892	1250000	1300000
CAMWBO010000005.1	26	0.578407	0.640326	0.904226	0.604488	-0.0619188	-203.235	1300000	1350000
CAMWBO010000005.1	27	0.692712	0.796694	0.833361	0.557113	-0.103982	-341.299	1350000	1400000
CAMWBO010000005.1	28	1.04865	1.16102	0.914447	0.61132	-0.112377	-368.854	1400000	1450000
CAMWBO010000005.1	29	1.26101	1.22241	1.09256	0.730391	0.0385957	126.682	1450000	1500000
CAMWBO010000005.1	30	0.630285	0.65883	1.03096	0.689212	-0.0285452	-93.6935	1500000	1550000
CAMWBO010000005.1	31	0.551062	0.660753	0.911178	0.609135	-0.109691	-360.036	1550000	1600000
CAMWBO010000005.1	32	0.7945	0.931397	0.917322	0.613242	-0.136898	-449.337	1600000	1650000
CAMWBO010000005.1	33	1.18156	1.30406	0.901788	0.602858	-0.122496	-402.065	1650000	1700000
CAMWBO010000005.1	34	1.21362	1.08193	1.23813	0.827704	0.131688	432.236	1700000	1750000
CAMWBO010000005.1	35	1.04127	0.941627	1.14148	0.763093	0.0996398	327.046	1750000	1800000
CAMWBO010000005.1	36	1.11362	1.24343	0.890245	0.595141	-0.129814	-426.088	1800000	1850000
CAMWBO010000005.1	37	1.22887	1.44809	0.84047	0.561866	-0.219215	-719.526	1850000	1900000
CAMWBO010000005.1	38	0.953914	0.921637	1.82079	1.21722	0.0322767	105.941	1900000	1950000
CAMWBO010000005.1	39	0.779848	0.370002	5.1683	3.45508	0.409847	1345.23	1950000	2000000
CAMWBO010000005.1	40	0.779165	0.191684	29.8215	19.9361	0.587481	1928.28	2000000	2050000
CAMWBO010000005.1	41	0.704612	0.270011	22.7393	15.2015	0.434601	1426.48	2050000	2100000
CAMWBO010000005.1	42	0.972179	0.908642	1.09463	0.731776	0.0635364	208.544	2100000	2150000
CAMWBO010000005.1	43	0.991123	1.02177	1.11983	0.748623	-0.0306484	-100.597	2150000	2200000
CAMWBO010000005.1	44	0.641469	0.572132	1.60581	1.0735	0.0693371	227.584	2200000	2250000
CAMWBO010000005.1	45	0.223547	0.199613	1.28019	0.855822	0.0239344	78.5594	2250000	2300000
CAMWBO010000005.1	46	0.813797	0.875712	1.06756	0.71368	-0.0619149	-203.222	2300000	2350000
CAMWBO010000005.1	47	0.306824	0.250492	1.98179	1.32485	0.0563313	184.895	2350000	2400000
CAMWBO010000005.1	48	1.05805	1.2081	0.892667	0.59676	-0.150051	-492.509	2400000	2450000
CAMWBO010000005.1	49	1.29168	1.28513	1.00926	0.674705	0.0065569	21.5216	2450000	2500000
CAMWBO010000005.1	50	1.36174	1.41469	0.957484	0.640091	-0.0529477	-173.789	2500000	2550000
CAMWBO010000005.1	51	0.895666	0.830091	1.70604	1.14051	0.0655746	215.234	2550000	2600000
CAMWBO010000005.1	52	1.15431	1.05605	1.10155	0.736402	0.0982621	322.524	2600000	2650000
CAMWBO010000005.1	53	1.34304	1.26937	1.07781	0.720531	0.073671	241.809	2650000	2700000
CAMWBO010000005.1	54	1.08831	0.891753	2.84074	1.89907	0.196562	645.171	2700000	2750000
CAMWBO010000005.1	55	0.736223	0.814687	1.43811	0.961395	-0.0784643	-257.542	2750000	2800000
CAMWBO010000005.1	56	1.42034	1.59188	0.890214	0.59512	-0.171539	-563.041	2800000	2850000
CAMWBO010000005.1	57	0.904174	0.854885	1.123	0.750741	0.0492886	161.779	2850000	2900000
CAMWBO010000005.1	58	0.361951	0.28269	1.30414	0.871838	0.079261	260.157	2900000	2950000
CAMWBO010000005.1	59	0.359132	0.26589	1.38299	0.924549	0.0932421	306.047	2950000	3000000
CAMWBO010000005.1	60	0.37127	0.294389	1.28751	0.860717	0.076881	252.345	3000000	3050000
CAMWBO010000005.1	61	0.378451	0.308986	1.23626	0.826457	0.0694653	228.005	3050000	3100000
CAMWBO010000005.1	62	0.384393	0.32104	1.22073	0.816077	0.0633533	207.944	3100000	3150000
CAMWBO010000005.1	63	0.311381	0.241665	1.31017	0.875864	0.0697161	228.828	3150000	3200000
CAMWBO010000005.1	64	0.472759	0.281467	1.69487	1.13304	0.191292	627.876	3200000	3250000
CAMWBO010000005.1	65	0.570669	0.552028	1.14624	0.766278	0.0186406	61.1836	3250000	3300000
CAMWBO010000005.1	66	0.426641	0.31711	1.38534	0.92612	0.109531	359.512	3300000	3350000
CAMWBO010000005.1	67	0.379852	0.264526	1.43094	0.956606	0.115326	378.532	3350000	3400000
CAMWBO010000005.1	68	0.404265	0.324718	1.2739	0.85162	0.079547	261.096	3400000	3450000
CAMWBO010000005.1	69	0.446107	0.347498	1.29979	0.868926	0.0986085	323.661	3450000	3500000
CAMWBO010000005.1	70	0.540311	0.432831	1.99951	1.3367	0.10748	352.78	3500000	3550000
CAMWBO010000005.1	71	0.343662	0.245513	1.85222	1.23823	0.0981495	322.155	3550000	3600000
CAMWBO010000005.1	72	0.417173	0.315416	1.34609	0.899879	0.101757	333.995	3600000	3650000
CAMWBO010000005.1	73	0.345131	0.239895	1.48446	0.992385	0.105235	345.412	3650000	3700000
CAMWBO010000005.1	74	0.349645	0.196624	1.74748	1.16821	0.153021	502.26	3700000	3750000
CAMWBO010000005.1	75	0.342758	0.229532	1.85401	1.23943	0.113226	371.641	3750000	3800000
CAMWBO010000005.1	76	0.383988	0.277397	1.39302	0.931255	0.10659	349.859	3800000	3850000
CAMWBO010000005.1	77	0.407966	0.279574	1.53864	1.0286	0.128392	421.419	3850000	3900000
CAMWBO010000005.1	78	0.437302	0.305715	1.45797	0.974676	0.131587	431.906	3900000	3950000
CAMWBO010000005.1	79	0.376544	0.248464	1.52252	1.01782	0.12808	420.397	3950000	4000000
CAMWBO010000005.1	80	0.370259	0.272951	1.35908	0.908566	0.0973087	319.395	4000000	4050000
CAMWBO010000005.1	81	0.520803	0.359085	1.45166	0.970456	0.161718	530.805	4050000	4100000
CAMWBO010000005.1	82	0.426539	0.305144	1.93245	1.29187	0.121395	398.453	4100000	4150000
CAMWBO010000005.1	83	0.57356	0.413925	1.44328	0.964855	0.159635	523.967	4150000	4200000
CAMWBO010000005.1	84	0.327013	0.191564	1.8166	1.21442	0.135449	444.581	4200000	4250000
CAMWBO010000005.1	85	0.380779	0.205941	1.87392	1.25274	0.174838	573.867	4250000	4300000
CAMWBO010000005.1	86	0.391812	0.210593	1.87497	1.25344	0.181219	594.812	4300000	4350000
CAMWBO010000005.1	87	0.378612	0.216388	1.79062	1.19705	0.162224	532.466	4350000	4400000
CAMWBO010000005.1	88	0.196611	0.101561	2.22312	1.48618	0.0950498	311.981	4400000	4450000
CAMWBO010000005.1	89	0.302687	0.13645	2.24254	1.49917	0.166237	545.637	4450000	4500000
CAMWBO010000005.1	90	0.294836	0.146022	2.03871	1.3629	0.148814	488.449	4500000	4550000
CAMWBO010000005.1	91	0.321723	0.161699	2.12885	1.42316	0.160024	525.244	4550000	4600000
CAMWBO010000005.1	92	0.470029	0.290131	1.78657	1.19435	0.179898	590.476	4600000	4650000
CAMWBO010000005.1	93	0.783778	0.686704	1.24227	0.830474	0.0970744	318.626	4650000	4700000
CAMWBO010000005.1	94	0.449298	0.366633	1.0693	0.714839	0.0826657	271.332	4700000	4750000
CAMWBO010000005.1	95	0.441626	0.335571	1.33625	0.893303	0.106054	348.1	4750000	4800000
CAMWBO010000005.1	96	0.443834	0.365498	1.19745	0.80051	0.0783361	257.121	4800000	4850000
CAMWBO010000005.1	97	0.637749	0.570986	1.15644	0.773097	0.0667632	219.136	4850000	4900000
CAMWBO010000005.1	98	0.930329	0.890904	1.09724	0.733521	0.0394248	129.403	4900000	4950000
CAMWBO010000005.1	99	2.14874	2.23539	0.962182	0.643232	-0.086651	-284.413	4950000	5000000
CAMWBO010000005.1	100	1.10604	1.38324	0.773819	0.517309	-0.277202	-909.855	5000000	5050000
CAMWBO010000005.1	101	0.898242	1.5161	0.587089	0.392477	-0.617861	-2028	5050000	5100000
CAMWBO010000005.1	102	1.16936	1.71276	0.674966	0.451224	-0.543405	-1783.61	5100000	5150000
CAMWBO010000005.1	103	1.28133	1.42875	0.909355	0.607916	-0.147423	-483.885	5150000	5200000
CAMWBO010000005.1	104	1.37787	1.60725	0.873792	0.584142	-0.229381	-752.893	5200000	5250000
CAMWBO010000005.1	105	1.44828	1.62175	0.907574	0.606725	-0.173471	-569.38	5250000	5300000
CAMWBO010000005.1	106	1.17584	1.15874	1.02943	0.688188	0.0171028	56.1363	5300000	5350000
CAMWBO010000005.1	107	0.957522	0.751879	1.35866	0.908279	0.205643	674.979	5350000	5400000
CAMWBO010000005.1	108	1.33124	0.885501	1.54973	1.03602	0.445739	1463.04	5400000	5450000
CAMWBO010000005.1	109	1.27034	0.913493	1.53339	1.02509	0.356849	1171.28	5450000	5500000
CAMWBO010000005.1	110	1.20912	1.29795	1.01344	0.677499	-0.0888329	-291.575	5500000	5550000
CAMWBO010000005.1	111	0.539695	1.03285	0.496417	0.331861	-0.493158	-1618.69	5550000	5600000
CAMWBO010000005.1	112	1.30053	1.09008	1.30265	0.870841	0.210454	690.769	5600000	5650000
CAMWBO010000005.1	113	1.18043	1.02565	1.19156	0.796576	0.154781	508.036	5650000	5700000
CAMWBO010000005.1	114	1.57246	1.45239	1.14414	0.764876	0.120077	394.127	5700000	5750000
CAMWBO010000005.1	115	1.39404	1.09125	1.37772	0.921025	0.302792	993.851	5750000	5800000
CAMWBO010000005.1	116	0.937546	0.921153	1.10821	0.740853	0.0163924	53.8044	5800000	5850000
CAMWBO010000005.1	117	1.12017	1.14963	0.908358	0.60725	-0.0294655	-96.7141	5850000	5900000
CAMWBO010000005.1	118	0.844699	0.796108	0.694743	0.464445	0.0485918	159.492	5900000	5950000
CAMWBO010000005.1	119	1.39762	1.39888	0.989084	0.661216	-0.00126001	-4.1357	5950000	6000000
CAMWBO010000005.1	120	0.912975	0.920323	1.14115	0.762877	-0.00734771	-24.1173	6000000	6050000
CAMWBO010000005.1	121	0.868024	0.971638	1.09116	0.729455	-0.103613	-340.089	6050000	6100000
CAMWBO010000005.1	122	1.00648	1.19059	0.842484	0.563212	-0.184112	-604.307	6100000	6150000
CAMWBO010000005.1	123	1.30766	1.41053	0.926151	0.619144	-0.102866	-337.636	6150000	6200000
CAMWBO010000005.1	124	0.874629	0.680937	1.38069	0.923008	0.193691	635.75	6200000	6250000
CAMWBO010000005.1	125	0.653078	0.499977	1.31807	0.88115	0.153101	502.52	6250000	6300000
CAMWBO010000005.1	126	1.29368	1.39838	0.932271	0.623236	-0.104694	-343.635	6300000	6350000
CAMWBO010000005.1	127	0.833689	0.861326	1.12953	0.755106	-0.0276368	-90.7118	6350000	6400000
CAMWBO010000005.1	128	0.753411	0.511485	1.99488	1.33361	0.241926	794.071	6400000	6450000
CAMWBO010000005.1	129	0.167288	0.116338	1.70586	1.14039	0.0509498	167.232	6450000	6500000
CAMWBO010000005.1	130	0.547424	0.587096	1.01474	0.678364	-0.0396716	-130.213	6500000	6550000
CAMWBO010000005.1	131	0.715417	0.652998	1.16751	0.780495	0.0624194	204.878	6550000	6600000
CAMWBO010000005.1	132	0.532491	0.716271	0.657726	0.439699	-0.183781	-603.22	6600000	6650000
CAMWBO010000005.1	133	1.36984	1.41123	1.00709	0.673252	-0.041393	-135.864	6650000	6700000
CAMWBO010000005.1	134	1.22522	1.14296	1.08917	0.728122	0.0822601	270.001	6700000	6750000
CAMWBO010000005.1	135	0.352916	0.390496	1.01928	0.681401	-0.0375804	-123.35	6750000	6800000
CAMWBO010000005.1	136	0.950049	0.81053	1.26719	0.847136	0.13952	457.943	6800000	6850000
CAMWBO010000005.1	137	0.938327	0.796859	1.27763	0.854114	0.141468	464.337	6850000	6900000
CAMWBO010000005.1	138	0.632746	0.881271	0.739027	0.494049	-0.248525	-815.728	6900000	6950000
CAMWBO010000005.1	139	0.687346	0.937578	0.612598	0.40953	-0.250232	-821.333	6950000	7000000
CAMWBO010000005.1	140	0.698193	0.976242	0.538217	0.359806	-0.278049	-912.636	7000000	7050000
CAMWBO010000005.1	141	1.41237	1.37817	1.03146	0.689543	0.034203	112.264	7050000	7100000
CAMWBO010000005.1	142	1.49954	1.69399	0.885305	0.591838	-0.194451	-638.244	7100000	7150000
CAMWBO010000005.1	143	1.04166	1.05489	0.935033	0.625083	-0.0132304	-43.426	7150000	7200000
CAMWBO010000005.1	144	1.35319	1.33292	1.02865	0.687664	0.0202759	66.5514	7200000	7250000
CAMWBO010000005.1	145	1.34343	1.13059	1.31833	0.881322	0.212843	698.611	7250000	7300000
CAMWBO010000005.1	146	0.872495	0.723151	1.42237	0.950876	0.149344	490.19	7300000	7350000
CAMWBO010000005.1	147	1.44903	1.0545	1.42729	0.954161	0.394526	1294.95	7350000	7400000
CAMWBO010000005.1	148	1.4347	1.44674	1.05943	0.70824	-0.0120436	-39.5306	7400000	7450000
CAMWBO010000005.1	149	1.70622	1.7694	0.965376	0.645367	-0.0631808	-207.377	7450000	7500000
CAMWBO010000005.1	150	1.14111	0.932238	1.2243	0.818459	0.208871	685.574	7500000	7515000
CAMWBO010000006.1	0	2.11463	1.92043	1.10808	0.740765	0.194201	637.423	0	50000
CAMWBO010000006.1	1	1.33313	1.39765	0.968148	0.64722	-0.0645229	-211.783	50000	100000
CAMWBO010000006.1	2	1.7084	1.83351	0.911799	0.60955	-0.125105	-410.631	100000	150000
CAMWBO010000006.1	3	0.938848	1.25197	0.660872	0.441802	-0.313125	-1027.77	150000	200000
CAMWBO010000006.1	4	1.49552	1.4281	1.05832	0.707504	0.0674157	221.277	200000	250000
CAMWBO010000006.1	5	1.51088	1.41992	1.06322	0.710778	0.0909653	298.574	250000	300000
CAMWBO010000006.1	6	1.32849	1.35757	0.993124	0.663917	-0.0290775	-95.4405	300000	350000
CAMWBO010000006.1	7	1.5543	1.61176	0.974135	0.651222	-0.0574612	-188.604	350000	400000
CAMWBO010000006.1	8	1.45522	1.82484	0.790405	0.528397	-0.369616	-1213.19	400000	450000
CAMWBO010000006.1	9	1.49106	1.55487	0.978753	0.65431	-0.0638055	-209.428	450000	500000
CAMWBO010000006.1	10	1.19673	1.19118	1.10547	0.73902	0.00555576	18.2356	500000	550000
CAMWBO010000006.1	11	0.698538	0.654038	1.8301	1.22345	0.0444998	146.061	550000	600000
CAMWBO010000006.1	12	1.0175	0.995242	1.18097	0.789492	0.0222599	73.0633	600000	650000
CAMWBO010000006.1	13	1.25474	1.29409	0.969624	0.648207	-0.03935	-129.158	650000	700000
CAMWBO010000006.1	14	0.763343	0.927345	0.777809	0.519976	-0.164002	-538.301	700000	750000
CAMWBO010000006.1	15	0.869245	1.08991	0.794623	0.531216	-0.220661	-724.271	750000	800000
CAMWBO010000006.1	16	0.922787	0.985911	0.925522	0.618724	-0.0631237	-207.19	800000	850000
CAMWBO010000006.1	17	1.54836	1.58527	0.980257	0.655315	-0.0369092	-121.146	850000	900000
CAMWBO010000006.1	18	0.969986	0.965258	1.06773	0.713795	0.00472874	15.5211	900000	950000
CAMWBO010000006.1	19	1.57511	1.38039	1.15596	0.772773	0.194719	639.124	950000	1000000
CAMWBO010000006.1	20	0.744421	0.773847	1.15271	0.770599	-0.0294263	-96.5854	1000000	1050000
CAMWBO010000006.1	21	0.529036	0.514875	1.10395	0.738006	0.0141604	46.4785	1050000	1100000
CAMWBO010000006.1	22	1.03168	1.01433	1.00717	0.673307	0.0173552	56.9648	1100000	1150000
CAMWBO010000006.1	23	1.22839	1.11458	1.13103	0.75611	0.113811	373.56	1150000	1200000
CAMWBO010000006.1	24	1.27048	1.1569	1.11465	0.745157	0.113583	372.81	1200000	1250000
CAMWBO010000006.1	25	1.4893	1.42433	1.03905	0.694617	0.0649768	213.272	1250000	1300000
CAMWBO010000006.1	26	1.3906	1.60215	0.840277	0.561737	-0.211557	-694.392	1300000	1350000
CAMWBO010000006.1	27	0.652421	0.720252	0.88179	0.589489	-0.067831	-222.641	1350000	1400000
CAMWBO010000006.1	28	0.996324	1.16369	0.859592	0.574649	-0.167368	-549.349	1400000	1450000
CAMWBO010000006.1	29	0.468915	0.412347	1.27954	0.855392	0.0565681	185.673	1450000	1500000
CAMWBO010000006.1	30	0.957354	0.967277	1.01536	0.678781	-0.00992311	-32.5705	1500000	1550000
CAMWBO010000006.1	31	0.979523	0.992365	0.911203	0.609151	-0.0128418	-42.1504	1550000	1600000
CAMWBO010000006.1	32	0.868699	1.00184	0.904813	0.60488	-0.13314	-437.002	1600000	1650000
CAMWBO010000006.1	33	0.807927	0.802189	0.992294	0.663362	0.0057385	18.8354	1650000	1700000
CAMWBO010000006.1	34	1.07223	1.02887	1.06485	0.711867	0.0433654	142.338	1700000	1750000
CAMWBO010000006.1	35	0.838548	0.791471	1.29402	0.865068	0.0470769	154.52	1750000	1800000
CAMWBO010000006.1	36	0.352892	0.167089	8.94411	5.97926	0.185803	609.858	1800000	1850000
CAMWBO010000006.1	37	0.737482	0.60072	8.76464	5.85928	0.136762	448.893	1850000	1900000
CAMWBO010000006.1	38	1.25579	1.29151	0.993294	0.66403	-0.0357169	-117.233	1900000	1950000
CAMWBO010000006.1	39	1.17397	0.970145	1.22182	0.816802	0.203824	669.007	1950000	2000000
CAMWBO010000006.1	40	0.965733	0.705477	3.28555	2.19643	0.260256	854.234	2000000	2050000
CAMWBO010000006.1	41	1.20367	0.946015	1.2941	0.865125	0.257651	845.684	2050000	2100000
CAMWBO010000006.1	42	1.36342	1.14074	1.17759	0.787236	0.222686	730.918	2100000	2150000
CAMWBO010000006.1	43	0.451049	0.641237	0.720826	0.481882	-0.190188	-624.252	2150000	2200000
CAMWBO010000006.1	44	0.55924	0.681181	0.752125	0.502806	-0.121941	-400.244	2200000	2250000
CAMWBO010000006.1	45	1.22956	1.24801	1.00171	0.669656	-0.0184494	-60.5561	2250000	2300000
CAMWBO010000006.1	46	1.82222	1.96225	0.931326	0.622604	-0.140034	-459.632	2300000	2350000
CAMWBO010000006.1	47	1.58309	1.71843	0.933029	0.623742	-0.135339	-444.221	2350000	2400000
CAMWBO010000006.1	48	1.67598	1.57358	1.14718	0.766904	0.102397	336.097	2400000	2450000
CAMWBO010000006.1	49	1.79688	1.74498	1.04641	0.699542	0.0519041	170.364	2450000	2500000
CAMWBO010000006.1	50	1.656	1.36714	1.22637	0.819844	0.288861	948.124	2500000	2550000
CAMWBO010000006.1	51	1.43199	1.0947	1.318	0.881098	0.337283	1107.06	2550000	2600000
CAMWBO010000006.1	52	1.60817	1.53202	1.05538	0.705535	0.0761502	249.947	2600000	2650000
CAMWBO010000006.1	53	1.3335	1.19436	1.11708	0.746782	0.139135	456.681	2650000	2700000
CAMWBO010000006.1	54	1.12517	0.991296	1.13003	0.755437	0.133877	439.424	2700000	2750000
CAMWBO010000006.1	55	1.17215	1.02765	1.16113	0.77623	0.144496	474.276	2750000	2800000
CAMWBO010000006.1	56	0.91567	0.767433	1.20738	0.807149	0.148237	486.556	2800000	2850000
CAMWBO010000006.1	57	0.70767	0.541232	1.31386	0.878335	0.166438	546.296	2850000	2900000
CAMWBO010000006.1	58	0.720018	0.599924	1.18567	0.792634	0.120094	394.183	2900000	2950000
CAMWBO010000006.1	59	0.459664	0.371265	1.25253	0.837335	0.0883994	290.152	2950000	3000000
CAMWBO010000006.1	60	0.570675	0.493338	1.16799	0.780817	0.0773376	253.844	3000000	3050000
CAMWBO010000006.1	61	0.705039	0.635431	1.11644	0.746354	0.0696086	228.475	3050000	3100000
CAMWBO010000006.1	62	0.605487	0.465616	1.48231	0.990942	0.139871	459.096	3100000	3150000
CAMWBO010000006.1	63	0.875763	0.740246	1.21532	0.812459	0.135517	444.805	3150000	3200000
CAMWBO010000006.1	64	1.15111	0.991636	1.18941	0.79514	0.159471	523.431	3200000	3250000
CAMWBO010000006.1	65	0.756181	0.604736	1.30313	0.871161	0.151446	497.087	3250000	3300000
CAMWBO010000006.1	66	0.641852	0.529621	1.23123	0.823096	0.112231	368.375	3300000	3350000
CAMWBO010000006.1	67	0.910291	0.723338	1.28674	0.860202	0.186953	613.633	3350000	3400000
CAMWBO010000006.1	68	1.052	0.990614	1.05799	0.70728	0.0613843	201.481	3400000	3450000
CAMWBO010000006.1	69	1.08554	0.934387	1.16625	0.779656	0.151149	496.114	3450000	3500000
CAMWBO010000006.1	70	1.19115	1.03607	1.1643	0.778352	0.155074	508.996	3500000	3550000
CAMWBO010000006.1	71	0.6166	0.489048	1.30823	0.874568	0.127551	418.66	3550000	3600000
CAMWBO010000006.1	72	0.935984	0.79503	1.18091	0.789457	0.140954	462.652	3600000	3650000
CAMWBO010000006.1	73	1.68587	1.58253	1.07579	0.719179	0.103342	339.197	3650000	3700000
CAMWBO010000006.1	74	1.47684	1.63924	0.890468	0.59529	-0.162402	-533.049	3700000	3750000
CAMWBO010000006.1	75	0.99871	1.21715	0.818413	0.54712	-0.218444	-716.995	3750000	3800000
CAMWBO010000006.1	76	0.706433	1.15479	0.609851	0.407693	-0.44836	-1471.64	3800000	3850000
CAMWBO010000006.1	77	0.509978	0.890164	0.549537	0.367373	-0.380186	-1247.88	3850000	3900000
CAMWBO010000006.1	78	0.383031	0.449667	0.860829	0.575476	-0.0666357	-218.717	3900000	3950000
CAMWBO010000006.1	79	1.03535	1.18167	0.880786	0.588817	-0.146325	-480.279	3950000	4000000
CAMWBO010000006.1	80	0.807151	1.00399	0.816661	0.545949	-0.196842	-646.092	4000000	4050000
CAMWBO010000006.1	81	0.84559	0.692153	1.24146	0.829936	0.153437	503.623	4050000	4100000
CAMWBO010000006.1	82	0.760734	0.656576	1.18801	0.794203	0.104158	341.876	4100000	4150000
CAMWBO010000006.1	83	0.466433	0.428799	0.977344	0.653368	0.0376331	123.522	4150000	4200000
CAMWBO010000006.1	84	0.790752	0.72909	1.07623	0.719477	0.0616623	202.393	4200000	4250000
CAMWBO010000006.1	85	1.09937	1.07009	1.10912	0.741459	0.0292848	96.1211	4250000	4300000
CAMWBO010000006.1	86	0.759638	0.416235	4.00441	2.677	0.343403	1127.15	4300000	4350000
CAMWBO010000006.1	87	0.703519	0.74725	1.13022	0.755566	-0.0437305	-143.536	4350000	4400000
CAMWBO010000006.1	88	0.742136	0.462612	1.63655	1.09406	0.279524	917.479	4400000	4450000
CAMWBO010000006.1	89	0.926113	0.656312	1.4959	1.00003	0.269802	885.566	4450000	4500000
CAMWBO010000006.1	90	0.337681	0.309568	1.51976	1.01598	0.0281138	92.2774	4500000	4550000
CAMWBO010000006.1	91	0.726758	0.656894	1.2536	0.838047	0.0698642	229.314	4550000	4600000
CAMWBO010000006.1	92	0.207148	0.26652	0.583988	0.390404	-0.0593721	-194.876	4600000	4650000
CAMWBO010000006.1	93	0.190214	0.155349	2.88404	1.92802	0.034865	114.437	4650000	4700000
CAMWBO010000006.1	94	0.188234	0.188309	2.7965	1.8695	-7.53967e-05	-0.247474	4700000	4750000
CAMWBO010000006.1	95	0.155538	0.22593	0.537834	0.359549	-0.0703923	-231.048	4750000	4800000
CAMWBO010000006.1	96	0.1031	0.107262	0.771892	0.51602	-0.00416133	-13.6587	4800000	4850000
CAMWBO010000006.1	97	0.0981165	0.0859363	1.92241	1.28516	0.0121802	39.9788	4850000	4900000
CAMWBO010000006.1	98	0.118419	0.141896	1.19795	0.800848	-0.0234766	-77.0568	4900000	4950000
CAMWBO010000006.1	99	0.733127	0.859208	0.972585	0.650186	-0.12608	-413.832	4950000	5000000
CAMWBO010000006.1	100	0.548983	1.03973	0.528511	0.353316	-0.490749	-1610.78	5000000	5050000
CAMWBO010000006.1	101	0.744257	1.13696	0.620609	0.414885	-0.392706	-1288.97	5050000	5100000
CAMWBO010000006.1	102	1.23307	1.07061	1.21306	0.810944	0.162459	533.238	5100000	5150000
CAMWBO010000006.1	103	0.928856	1.02611	0.939571	0.628116	-0.0972569	-319.225	5150000	5200000
CAMWBO010000006.1	104	1.13102	1.0927	1.06199	0.709953	0.03832	125.777	5200000	5250000
CAMWBO010000006.1	105	0.903699	0.86578	1.31512	0.879177	0.0379189	124.46	5250000	5300000
CAMWBO010000006.1	106	0.22679	0.181163	2.20298	1.47272	0.0456268	149.76	5300000	5350000
CAMWBO010000006.1	107	0.287869	0.094131	5.9074	3.94917	0.193738	635.905	5350000	5400000
CAMWBO010000006.1	108	0.364674	0.173725	10.6215	7.10061	0.190949	626.748	5400000	5450000
CAMWBO010000006.1	109	0.325053	0.245992	1.51829	1.015	0.0790609	259.5	5450000	5500000
CAMWBO010000006.1	110	0.591128	0.69453	0.853025	0.570259	-0.103401	-339.393	5500000	5550000
CAMWBO010000006.1	111	0.537324	0.749333	0.719968	0.481309	-0.212009	-695.875	5550000	5600000
CAMWBO010000006.1	112	0.851015	1.02372	0.82218	0.549639	-0.172704	-566.864	5600000	5650000
CAMWBO010000006.1	113	0.662722	0.94769	0.67813	0.453339	-0.284968	-935.347	5650000	5700000
CAMWBO010000006.1	114	1.2123	1.25759	1.0161	0.679276	-0.0452898	-148.654	5700000	5750000
CAMWBO010000006.1	115	1.40075	1.28073	1.10669	0.739839	0.120027	393.964	5750000	5800000
CAMWBO010000006.1	116	0.976224	0.676523	1.67136	1.11732	0.299701	983.704	5800000	5850000
CAMWBO010000006.1	117	1.0307	1.18205	0.950776	0.635607	-0.15135	-496.773	5850000	5900000
CAMWBO010000006.1	118	0.75701	0.968311	0.805182	0.538275	-0.211301	-693.55	5900000	5950000
CAMWBO010000006.1	119	0.951565	1.09031	0.866779	0.579453	-0.138748	-455.411	5950000	6000000
CAMWBO010000006.1	120	1.50075	1.47125	1.03821	0.694054	0.0295036	96.8391	6000000	6050000
CAMWBO010000006.1	121	1.18494	1.27869	0.931006	0.62239	-0.0937521	-307.721	6050000	6100000
CAMWBO010000006.1	122	0.937566	0.758523	1.33243	0.890749	0.179043	587.669	6100000	6150000
CAMWBO010000006.1	123	0.943638	0.980746	0.989935	0.661785	-0.0371081	-121.799	6150000	6200000
CAMWBO010000006.1	124	0.91165	1.15098	0.795912	0.532078	-0.23933	-785.55	6200000	6250000
CAMWBO010000006.1	125	0.718509	0.681241	1.02023	0.682038	0.0372685	122.326	6250000	6300000
CAMWBO010000006.1	126	0.852226	0.945669	0.796008	0.532142	-0.0934428	-306.706	6300000	6350000
CAMWBO010000006.1	127	0.620502	1.07838	0.574119	0.383806	-0.457878	-1502.89	6350000	6400000
CAMWBO010000006.1	128	0.976453	1.26415	0.761804	0.509276	-0.287701	-944.316	6400000	6450000
CAMWBO010000006.1	129	0.727932	0.731488	1.95338	1.30586	-0.00355532	-11.6696	6450000	6500000
CAMWBO010000006.1	130	0.642904	0.628577	1.01525	0.678712	0.0143273	47.0264	6500000	6550000
CAMWBO010000006.1	131	0.349131	0.521126	0.701602	0.46903	-0.171996	-564.538	6550000	6600000
CAMWBO010000006.1	132	0.0959453	0.517001	0.179309	0.119871	-0.421055	-1382.02	6600000	6650000
CAMWBO010000006.1	133	0.369303	0.73482	0.533023	0.356333	-0.365518	-1199.73	6650000	6700000
CAMWBO010000006.1	134	0.444451	0.434379	1.26127	0.843174	0.0100719	33.0587	6700000	6750000
CAMWBO010000006.1	135	0.868987	0.768022	1.30267	0.870855	0.100965	331.397	6750000	6800000
CAMWBO010000006.1	136	1.237	1.09019	1.18083	0.789402	0.146808	481.866	6800000	6850000
CAMWBO010000006.1	137	0.771155	0.590209	1.65225	1.10455	0.180946	593.915	6850000	6900000
CAMWBO010000006.1	138	0.958804	0.78852	1.80429	1.20619	0.170284	558.92	6900000	6950000
CAMWBO010000006.1	139	1.0689	0.835808	1.32974	0.888949	0.233094	765.081	6950000	7000000
CAMWBO010000006.1	140	0.912349	0.775066	1.19255	0.797237	0.137283	450.603	7000000	7050000
CAMWBO010000006.1	141	0.630417	0.63124	1.05966	0.708398	-0.000823014	-2.70137	7050000	7100000
CAMWBO010000006.1	142	0.958393	0.759547	1.53902	1.02886	0.198846	652.67	7100000	7150000
CAMWBO010000006.1	143	0.820559	0.653501	1.6402	1.0965	0.167058	548.332	7150000	7200000
CAMWBO010000006.1	144	1.10537	1.08532	1.09103	0.72937	0.0200452	65.7941	7200000	7250000
CAMWBO010000006.1	145	0.558767	0.421495	6.75355	4.51484	0.137272	450.566	7250000	7300000
CAMWBO010000006.1	146	1.30226	1.0522	1.24326	0.831137	0.250054	820.75	7300000	7350000
CAMWBO010000006.1	147	1.7595	1.71279	1.03906	0.694626	0.0467134	153.327	7350000	7395000
CAMWBO010000008.1	0	1.34143	1.30529	1.03093	0.689188	0.0361318	118.595	0	50000
CAMWBO010000008.1	1	1.45514	1.32734	1.10052	0.735716	0.127803	419.487	50000	100000
CAMWBO010000008.1	2	1.47378	1.46451	1.00714	0.673288	0.00926318	30.4044	100000	150000
CAMWBO010000008.1	3	1.10012	1.11108	0.984691	0.658279	-0.0109574	-35.9654	150000	200000
CAMWBO010000008.1	4	1.20968	1.22838	1.00789	0.673789	-0.0186946	-61.3611	200000	250000
CAMWBO010000008.1	5	1.33694	1.27537	1.07032	0.715524	0.0615632	202.068	250000	300000
CAMWBO010000008.1	6	1.64244	1.3093	1.29424	0.865218	0.333147	1093.48	300000	350000
CAMWBO010000008.1	7	1.2897	1.1508	1.22679	0.820128	0.138902	455.914	350000	400000
CAMWBO010000008.1	8	1.34468	1.47243	0.910898	0.608947	-0.127744	-419.292	400000	450000
CAMWBO010000008.1	9	1.23901	1.78027	0.672414	0.449518	-0.541266	-1776.59	450000	500000
CAMWBO010000008.1	10	1.59854	1.64128	0.991096	0.662561	-0.0427344	-140.267	500000	550000
CAMWBO010000008.1	11	1.66515	1.7369	0.963463	0.644088	-0.0717514	-235.509	550000	600000
CAMWBO010000008.1	12	1.62582	1.84178	0.873688	0.584072	-0.215962	-708.847	600000	650000
CAMWBO010000008.1	13	1.64939	1.83618	0.907839	0.606903	-0.18679	-613.098	650000	700000
CAMWBO010000008.1	14	2.06036	2.2119	0.92444	0.618	-0.151533	-497.373	700000	750000
CAMWBO010000008.1	15	1.51564	1.71867	0.882365	0.589873	-0.203037	-666.427	750000	800000
CAMWBO010000008.1	16	1.48958	1.61281	0.93237	0.623302	-0.12323	-404.474	800000	850000
CAMWBO010000008.1	17	0.976113	1.01171	0.757296	0.506263	-0.0355993	-116.847	850000	900000
CAMWBO010000008.1	18	1.83075	1.62692	1.12829	0.754278	0.203827	669.018	900000	950000
CAMWBO010000008.1	19	1.46419	1.73433	0.848553	0.567269	-0.270138	-886.671	950000	1000000
CAMWBO010000008.1	20	1.09854	1.34194	0.841107	0.562292	-0.243405	-798.925	1000000	1050000
CAMWBO010000008.1	21	1.25397	1.28497	1.04825	0.700769	-0.0309906	-101.72	1050000	1100000
CAMWBO010000008.1	22	1.49646	1.49521	1.03353	0.690928	0.00124976	4.10208	1100000	1150000
CAMWBO010000008.1	23	0.967413	0.82968	1.37883	0.921766	0.137733	452.08	1150000	1200000
CAMWBO010000008.1	24	0.343063	0.511843	0.698495	0.466954	-0.16878	-553.983	1200000	1250000
CAMWBO010000008.1	25	1.10039	0.946679	1.18423	0.791674	0.153715	504.535	1250000	1300000
CAMWBO010000008.1	26	0.86682	0.687439	1.33867	0.894917	0.179381	588.78	1300000	1350000
CAMWBO010000008.1	27	0.695254	0.786949	1.09761	0.733765	-0.091695	-300.969	1350000	1400000
CAMWBO010000008.1	28	0.860052	1.0038	0.866472	0.579248	-0.14375	-471.829	1400000	1450000
CAMWBO010000008.1	29	1.04388	1.14555	0.920095	0.615096	-0.101669	-333.708	1450000	1500000
CAMWBO010000008.1	30	0.828331	0.794517	2.71318	1.8138	0.0338138	110.987	1500000	1550000
CAMWBO010000008.1	31	1.56881	1.61562	0.999489	0.668172	-0.0468151	-153.66	1550000	1600000
CAMWBO010000008.1	32	1.18214	1.26706	0.947125	0.633166	-0.0849246	-278.747	1600000	1650000
CAMWBO010000008.1	33	1.11234	1.26088	0.917048	0.613059	-0.148543	-487.561	1650000	1700000
CAMWBO010000008.1	34	1.24321	1.01853	1.2831	0.857768	0.224679	737.46	1700000	1750000
CAMWBO010000008.1	35	0.793379	0.566867	1.85329	1.23895	0.226512	743.478	1750000	1800000
CAMWBO010000008.1	36	0.901792	0.98799	0.936859	0.626303	-0.0861983	-282.927	1800000	1850000
CAMWBO010000008.1	37	0.894086	0.950029	0.979695	0.654939	-0.0559439	-183.624	1850000	1900000
CAMWBO010000008.1	38	1.06493	0.950112	1.08869	0.727802	0.114813	376.849	1900000	1950000
CAMWBO010000008.1	39	0.503346	0.654488	0.670523	0.448253	-0.151142	-496.092	1950000	2000000
CAMWBO010000008.1	40	0.529792	0.730711	0.581525	0.388758	-0.200919	-659.474	2000000	2050000
CAMWBO010000008.1	41	1.01892	1.16372	0.866309	0.57914	-0.144801	-475.278	2050000	2100000
CAMWBO010000008.1	42	1.2431	1.49849	0.784797	0.524647	-0.255387	-838.254	2100000	2150000
CAMWBO010000008.1	43	1.10205	1.19156	0.960715	0.642251	-0.0895079	-293.79	2150000	2200000
CAMWBO010000008.1	44	0.995431	1.256	0.773366	0.517005	-0.26057	-855.264	2200000	2250000
CAMWBO010000008.1	45	1.79884	1.80347	1.07082	0.715857	-0.0046286	-15.1924	2250000	2300000
CAMWBO010000008.1	46	1.55846	1.53828	1.0416	0.696326	0.0201729	66.2133	2300000	2350000
CAMWBO010000008.1	47	1.21965	1.31008	0.94046	0.62871	-0.090432	-296.824	2350000	2400000
CAMWBO010000008.1	48	1.61199	1.58468	1.02967	0.688345	0.0273142	89.6531	2400000	2450000
CAMWBO010000008.1	49	1.46873	1.69044	0.867905	0.580206	-0.221711	-727.72	2450000	2500000
CAMWBO010000008.1	50	1.36609	1.16796	1.31903	0.881788	0.198122	650.294	2500000	2550000
CAMWBO010000008.1	51	1.05447	1.24196	0.870279	0.581793	-0.187497	-615.418	2550000	2600000
CAMWBO010000008.1	52	1.38007	1.31518	1.08673	0.726496	0.0648953	213.005	2600000	2650000
CAMWBO010000008.1	53	1.43442	1.67731	0.850172	0.568352	-0.24289	-797.234	2650000	2700000
CAMWBO010000008.1	54	1.29512	1.49064	0.868231	0.580424	-0.195523	-641.761	2700000	2750000
CAMWBO010000008.1	55	1.03041	1.09329	0.938604	0.62747	-0.0628838	-206.403	2750000	2800000
CAMWBO010000008.1	56	1.56782	1.57072	1.00082	0.669063	-0.00290115	-9.52239	2800000	2850000
CAMWBO010000008.1	57	1.55512	1.59522	0.969017	0.647801	-0.040098	-131.613	2850000	2900000
CAMWBO010000008.1	58	1.23353	1.25856	0.995212	0.665313	-0.0250354	-82.1734	2900000	2950000
CAMWBO010000008.1	59	0.816278	0.910157	0.868755	0.580775	-0.0938792	-308.138	2950000	3000000
CAMWBO010000008.1	60	1.1619	1.05545	1.10576	0.739218	0.106451	349.402	3000000	3050000
CAMWBO010000008.1	61	0.89669	0.790345	1.1969	0.800141	0.106344	349.053	3050000	3100000
CAMWBO010000008.1	62	0.814347	0.528798	1.77527	1.18679	0.285549	937.253	3100000	3150000
CAMWBO010000008.1	63	0.792418	0.535784	1.62035	1.08323	0.256634	842.346	3150000	3200000
CAMWBO010000008.1	64	0.646524	0.426687	2.36246	1.57934	0.219837	721.568	3200000	3250000
CAMWBO010000008.1	65	0.291458	0.111937	3.48888	2.33236	0.179521	589.238	3250000	3300000
CAMWBO010000008.1	66	0.377062	0.164411	10.6431	7.11507	0.212651	697.983	3300000	3350000
CAMWBO010000008.1	67	0.49623	0.322428	1.95953	1.30997	0.173802	570.469	3350000	3400000
CAMWBO010000008.1	68	0.93836	0.657403	1.45445	0.972317	0.280957	922.18	3400000	3450000
CAMWBO010000008.1	69	0.508788	0.291037	1.54629	1.03371	0.217751	714.721	3450000	3500000
CAMWBO010000008.1	70	0.388737	0.209462	1.92888	1.28948	0.179275	588.433	3500000	3550000
CAMWBO010000008.1	71	0.307472	0.0886866	3.64104	2.43409	0.218786	718.117	3550000	3600000
CAMWBO010000008.1	72	0.277438	0.0982304	2.94954	1.97181	0.179208	588.211	3600000	3650000
CAMWBO010000008.1	73	0.344617	0.182853	1.959	1.30962	0.161763	530.953	3650000	3700000
CAMWBO010000008.1	74	0.457115	0.329816	1.49239	0.99768	0.127299	417.832	3700000	3750000
CAMWBO010000008.1	75	0.943974	0.709588	1.35455	0.905534	0.234386	769.322	3750000	3800000
CAMWBO010000008.1	76	0.512539	0.373554	1.37959	0.922274	0.138985	456.19	3800000	3850000
CAMWBO010000008.1	77	1.04286	0.983004	1.07721	0.720127	0.0598602	196.478	3850000	3900000
CAMWBO010000008.1	78	1.0535	0.956607	1.14263	0.763863	0.096888	318.014	3900000	3950000
CAMWBO010000008.1	79	1.40405	1.42169	0.997183	0.666631	-0.0176472	-57.9231	3950000	4000000
CAMWBO010000008.1	80	1.63969	1.67294	0.98983	0.661715	-0.0332437	-109.115	4000000	4050000
CAMWBO010000008.1	81	1.23677	1.06061	1.1755	0.785835	0.176164	578.22	4050000	4100000
CAMWBO010000008.1	82	0.391863	0.452116	0.979022	0.654489	-0.0602527	-197.767	4100000	4150000
CAMWBO010000008.1	83	0.175469	0.298048	0.609287	0.407317	-0.122578	-402.337	4150000	4200000
CAMWBO010000008.1	84	0.154034	0.281321	0.603211	0.403255	-0.127287	-417.793	4200000	4250000
CAMWBO010000008.1	85	1.01137	0.810767	1.35383	0.905057	0.2006	658.426	4250000	4300000
CAMWBO010000008.1	86	1.35179	1.19193	1.12289	0.750667	0.159854	524.687	4300000	4350000
CAMWBO010000008.1	87	0.869228	1.08624	0.755987	0.505388	-0.217016	-712.307	4350000	4400000
CAMWBO010000008.1	88	1.21439	1.46049	0.824746	0.551354	-0.246098	-807.765	4400000	4450000
CAMWBO010000008.1	89	0.357981	0.491903	0.984157	0.657923	-0.133923	-439.573	4450000	4500000
CAMWBO010000008.1	90	0.172908	0.0622566	8.76518	5.85964	0.110652	363.19	4500000	4550000
CAMWBO010000008.1	91	0.436855	0.222236	18.199	12.1663	0.214619	704.441	4550000	4600000
CAMWBO010000008.1	92	0.0768968	0.156194	1.32814	0.887881	-0.0792976	-260.277	4600000	4650000
CAMWBO010000008.1	93	0.0616459	0.0720449	0.909339	0.607906	-0.010399	-34.1326	4650000	4700000
CAMWBO010000008.1	94	0.290239	0.356122	0.90999	0.608341	-0.0658829	-216.246	4700000	4750000
CAMWBO010000008.1	95	0.418354	0.457688	1.06192	0.709906	-0.0393335	-129.104	4750000	4800000
CAMWBO010000008.1	96	0.607749	0.425858	1.4767	0.987191	0.18189	597.016	4800000	4850000
CAMWBO010000008.1	97	0.266941	0.16553	1.73556	1.16024	0.10141	332.857	4850000	4900000
CAMWBO010000008.1	98	0.305816	0.505295	0.805922	0.53877	-0.199479	-654.745	4900000	4950000
CAMWBO010000008.1	99	0.649811	0.476046	1.52434	1.01904	0.173765	570.345	4950000	5000000
CAMWBO010000008.1	100	1.11618	0.871935	1.52396	1.01879	0.24424	801.665	5000000	5050000
CAMWBO010000008.1	101	0.663832	0.549276	1.34534	0.899381	0.114555	376.003	5050000	5100000
CAMWBO010000008.1	102	0.915996	0.821436	1.39562	0.932988	0.0945602	310.374	5100000	5150000
CAMWBO010000008.1	103	1.1211	1.0797	1.04021	0.695393	0.0414009	135.89	5150000	5200000
CAMWBO010000008.1	104	0.815957	0.748957	1.1286	0.754482	0.0669999	219.913	5200000	5250000
CAMWBO010000008.1	105	0.86849	1.08591	0.796632	0.532559	-0.21742	-713.634	5250000	5300000
CAMWBO010000008.1	106	1.34539	1.31368	1.12525	0.752247	0.0317109	104.084	5300000	5350000
CAMWBO010000008.1	107	0.624725	0.629931	0.998937	0.667803	-0.0052055	-17.0859	5350000	5400000
CAMWBO010000008.1	108	0.97069	0.824557	1.20678	0.806749	0.146134	479.653	5400000	5450000
CAMWBO010000008.1	109	0.926453	0.800461	1.23444	0.825243	0.125992	413.543	5450000	5500000
CAMWBO010000008.1	110	0.908169	0.7666	1.27943	0.855318	0.141569	464.668	5500000	5550000
CAMWBO010000008.1	111	0.976109	0.774132	1.42309	0.951357	0.201977	662.947	5550000	5600000
CAMWBO010000008.1	112	0.961948	1.2292	0.763867	0.510656	-0.267254	-877.205	5600000	5650000
CAMWBO010000008.1	113	0.747263	0.892365	0.87263	0.583365	-0.145102	-476.266	5650000	5700000
CAMWBO010000008.1	114	0.878413	1.07389	0.822372	0.549767	-0.195475	-641.605	5700000	5750000
CAMWBO010000008.1	115	0.552639	1.0691	0.52338	0.349887	-0.516461	-1695.17	5750000	5800000
CAMWBO010000008.1	116	0.77276	1.05242	0.64954	0.434227	-0.279658	-917.917	5800000	5850000
CAMWBO010000008.1	117	0.151776	0.873474	0.171309	0.114522	-0.721698	-2368.82	5850000	5900000
CAMWBO010000008.1	118	0.580055	0.938092	0.606815	0.405664	-0.358037	-1175.18	5900000	5950000
CAMWBO010000008.1	119	0.738214	0.836975	0.919125	0.614447	-0.0987606	-324.16	5950000	6000000
CAMWBO010000008.1	120	0.542026	0.67008	0.801591	0.535875	-0.128054	-420.31	6000000	6050000
CAMWBO010000008.1	121	0.359726	0.402413	2.39517	1.6012	-0.0426877	-140.113	6050000	6100000
CAMWBO010000008.1	122	0.488705	0.420029	1.3049	0.872347	0.0686756	225.413	6100000	6150000
CAMWBO010000008.1	123	0.891867	0.942052	0.967858	0.647027	-0.0501843	-164.719	6150000	6200000
CAMWBO010000008.1	124	0.616724	0.350356	4.36441	2.91767	0.266368	874.297	6200000	6250000
CAMWBO010000008.1	125	0.540766	0.186047	6.83835	4.57153	0.354718	1164.29	6250000	6300000
CAMWBO010000008.1	126	0.56365	0.46522	1.42374	0.951789	0.0984296	323.074	6300000	6350000
CAMWBO010000008.1	127	1.15839	1.1917	1.12524	0.75224	-0.0333106	-109.335	6350000	6400000
CAMWBO010000008.1	128	0.41654	0.486905	0.880884	0.588883	-0.0703651	-230.958	6400000	6450000
CAMWBO010000008.1	129	0.552136	0.506298	1.48578	0.993264	0.0458384	150.455	6450000	6500000
CAMWBO010000008.1	130	0.225726	0.224822	0.895247	0.598484	0.000904048	2.96734	6500000	6550000
CAMWBO010000008.1	131	0.736792	0.999132	0.758697	0.507199	-0.26234	-861.073	6550000	6600000
CAMWBO010000008.1	132	0.133126	0.2588	0.514397	0.343881	-0.125674	-412.498	6600000	6605000
CAMWBO010000009.1	0	1.81897	1.8823	0.973913	0.651074	-0.0633323	-207.875	0	50000
CAMWBO010000009.1	1	1.24463	1.11135	1.1612	0.77628	0.133279	437.461	50000	100000
CAMWBO010000009.1	2	1.27608	1.33615	0.979298	0.654674	-0.0600763	-197.188	100000	150000
CAMWBO010000009.1	3	1.13402	1.346	0.834421	0.557822	-0.21198	-695.779	150000	200000
CAMWBO010000009.1	4	1.34468	1.48319	0.905242	0.605166	-0.138512	-454.635	200000	250000
CAMWBO010000009.1	5	0.988117	1.24107	0.78769	0.526581	-0.252949	-830.25	250000	300000
CAMWBO010000009.1	6	1.10301	1.00857	1.18277	0.790698	0.094443	309.989	300000	350000
CAMWBO010000009.1	7	1.39028	1.26314	1.14261	0.763853	0.127135	417.292	350000	400000
CAMWBO010000009.1	8	1.01604	0.772621	7.49439	5.0101	0.243424	798.986	400000	450000
CAMWBO010000009.1	9	0.681388	0.375513	3.99481	2.67059	0.305875	1003.97	450000	500000
CAMWBO010000009.1	10	0.790964	0.305947	2.93346	1.96106	0.485017	1591.96	500000	550000
CAMWBO010000009.1	11	0.685694	0.454672	2.24124	1.4983	0.231022	758.281	550000	600000
CAMWBO010000009.1	12	1.11885	1.262	0.902021	0.603013	-0.14315	-469.86	600000	650000
CAMWBO010000009.1	13	1.35468	1.33571	1.03987	0.695166	0.0189767	62.287	650000	700000
CAMWBO010000009.1	14	1.40462	1.20588	1.16638	0.77974	0.198738	652.316	700000	750000
CAMWBO010000009.1	15	1.01173	0.996804	1.0486	0.701003	0.0149219	48.9778	750000	800000
CAMWBO010000009.1	16	1.02868	0.940171	1.08987	0.728591	0.0885078	290.508	800000	850000
CAMWBO010000009.1	17	0.465266	0.393669	4.21413	2.8172	0.071597	235.002	850000	900000
CAMWBO010000009.1	18	0.648685	0.67723	1.05265	0.703709	-0.0285448	-93.6921	900000	950000
CAMWBO010000009.1	19	0.216138	0.147976	1.51803	1.01482	0.0681614	223.725	950000	1000000
CAMWBO010000009.1	20	0.0467471	0.0367391	1.31316	0.877867	0.010008	32.8491	1000000	1050000
CAMWBO010000009.1	21	0.238479	0.187188	1.36516	0.912626	0.0512908	168.351	1050000	1100000
CAMWBO010000009.1	22	0.344241	0.32277	1.07066	0.715751	0.0214703	70.4717	1100000	1150000
CAMWBO010000009.1	23	0.807537	0.694252	1.25212	0.837059	0.113285	371.833	1150000	1200000
CAMWBO010000009.1	24	1.01331	1.09157	0.957603	0.640171	-0.0782593	-256.869	1200000	1250000
CAMWBO010000009.1	25	0.499499	0.517573	1.01661	0.679619	-0.0180747	-59.3263	1250000	1300000
CAMWBO010000009.1	26	0.113456	0.0807817	1.60244	1.07125	0.0326745	107.247	1300000	1350000
CAMWBO010000009.1	27	0.259531	0.449035	0.819183	0.547635	-0.189504	-622.006	1350000	1400000
CAMWBO010000009.1	28	0.666435	0.842509	1.03146	0.689547	-0.176075	-577.928	1400000	1450000
CAMWBO010000009.1	29	0.551019	0.489492	1.55848	1.04186	0.0615272	201.95	1450000	1500000
CAMWBO010000009.1	30	0.950263	0.879613	1.10716	0.740149	0.0706501	231.894	1500000	1550000
CAMWBO010000009.1	31	1.18357	1.24379	1.07477	0.718499	-0.0602199	-197.659	1550000	1600000
CAMWBO010000009.1	32	0.805536	0.932942	0.856932	0.572871	-0.127406	-418.181	1600000	1650000
CAMWBO010000009.1	33	0.549146	0.796519	0.670299	0.448104	-0.247373	-811.947	1650000	1700000
CAMWBO010000009.1	34	1.018	1.28056	0.785638	0.52521	-0.262562	-861.802	1700000	1750000
CAMWBO010000009.1	35	1.13551	1.23037	0.924241	0.617868	-0.0948543	-311.339	1750000	1800000
CAMWBO010000009.1	36	0.738597	0.7469	1.09158	0.729735	-0.00830284	-27.2523	1800000	1850000
CAMWBO010000009.1	37	0.433627	0.234261	3.88234	2.5954	0.199366	654.374	1850000	1900000
CAMWBO010000009.1	38	0.779535	0.796984	1.02186	0.683128	-0.0174498	-57.2751	1900000	1950000
CAMWBO010000009.1	39	0.701538	0.734595	0.920396	0.615297	-0.0330578	-108.505	1950000	2000000
CAMWBO010000009.1	40	1.04228	0.990858	1.10486	0.738614	0.0514261	168.795	2000000	2050000
CAMWBO010000009.1	41	1.35902	1.47808	0.936305	0.625933	-0.119065	-390.804	2050000	2100000
CAMWBO010000009.1	42	0.787604	0.87879	1.00696	0.673164	-0.0911864	-299.3	2100000	2150000
CAMWBO010000009.1	43	1.47973	1.55636	0.953993	0.637757	-0.0766344	-251.536	2150000	2200000
CAMWBO010000009.1	44	1.35346	1.42271	0.957134	0.639857	-0.0692491	-227.295	2200000	2250000
CAMWBO010000009.1	45	1.16649	1.32181	0.824693	0.551319	-0.155317	-509.795	2250000	2300000
CAMWBO010000009.1	46	1.45505	1.67517	0.873828	0.584166	-0.220125	-722.513	2300000	2350000
CAMWBO010000009.1	47	1.74385	1.99001	0.878246	0.58712	-0.246166	-807.986	2350000	2400000
CAMWBO010000009.1	48	1.73709	2.01505	0.861974	0.576241	-0.277958	-912.337	2400000	2450000
CAMWBO010000009.1	49	0.817459	0.725056	1.11352	0.744406	0.0924032	303.294	2450000	2500000
CAMWBO010000009.1	50	1.61915	1.71606	0.97105	0.64916	-0.0969064	-318.074	2500000	2550000
CAMWBO010000009.1	51	1.59624	1.86774	0.855878	0.572166	-0.271499	-891.137	2550000	2600000
CAMWBO010000009.1	52	1.26455	1.52449	0.830989	0.555527	-0.259933	-853.175	2600000	2650000
CAMWBO010000009.1	53	0.664164	0.680341	1.07712	0.72007	-0.0161772	-53.0982	2650000	2700000
CAMWBO010000009.1	54	1.13843	1.23936	0.917338	0.613253	-0.100936	-331.301	2700000	2750000
CAMWBO010000009.1	55	1.25777	1.41108	0.889261	0.594483	-0.153309	-503.204	2750000	2800000
CAMWBO010000009.1	56	1.53276	1.623	0.934777	0.624911	-0.0902471	-296.217	2800000	2850000
CAMWBO010000009.1	57	1.64104	1.90209	0.860036	0.574946	-0.261051	-856.844	2850000	2900000
CAMWBO010000009.1	58	1.51367	1.68617	0.857927	0.573536	-0.172501	-566.197	2900000	2950000
CAMWBO010000009.1	59	1.62293	1.67883	0.959288	0.641297	-0.0558918	-183.453	2950000	3000000
CAMWBO010000009.1	60	0.990314	1.08613	0.922663	0.616813	-0.0958143	-314.49	3000000	3050000
CAMWBO010000009.1	61	0.9056	0.987024	0.9379	0.626999	-0.0814244	-267.258	3050000	3100000
CAMWBO010000009.1	62	1.12501	1.27901	0.870389	0.581867	-0.153999	-505.469	3100000	3150000
CAMWBO010000009.1	63	0.853115	1.10397	0.766811	0.512623	-0.250851	-823.364	3150000	3200000
CAMWBO010000009.1	64	0.890314	1.1401	0.782491	0.523106	-0.249784	-819.861	3200000	3250000
CAMWBO010000009.1	65	1.09414	1.27316	0.854613	0.57132	-0.179021	-587.599	3250000	3300000
CAMWBO010000009.1	66	0.917082	1.13558	0.802751	0.53665	-0.218502	-717.186	3300000	3350000
CAMWBO010000009.1	67	0.718552	0.81139	0.87035	0.581841	-0.0928378	-304.72	3350000	3400000
CAMWBO010000009.1	68	0.935667	1.19936	0.779736	0.521264	-0.263692	-865.511	3400000	3450000
CAMWBO010000009.1	69	1.513	1.56163	0.970229	0.648611	-0.048631	-159.621	3450000	3500000
CAMWBO010000009.1	70	1.14022	1.24988	0.981602	0.656214	-0.109662	-359.942	3500000	3550000
CAMWBO010000009.1	71	1.43292	1.5203	0.93986	0.628309	-0.0873827	-286.815	3550000	3600000
CAMWBO010000009.1	72	1.0906	1.23537	0.872047	0.582975	-0.144772	-475.182	3600000	3650000
CAMWBO010000009.1	73	1.46797	1.41277	1.03368	0.691029	0.0551936	181.161	3650000	3700000
CAMWBO010000009.1	74	1.22363	1.281	0.963224	0.643928	-0.0573662	-188.292	3700000	3750000
CAMWBO010000009.1	75	1.6032	1.64003	0.976878	0.653057	-0.036835	-120.903	3750000	3800000
CAMWBO010000009.1	76	1.50028	1.58262	0.950055	0.635124	-0.0823309	-270.233	3800000	3850000
CAMWBO010000009.1	77	1.74988	1.84586	0.946394	0.632677	-0.0959815	-315.039	3850000	3900000
CAMWBO010000009.1	78	1.13461	1.29989	0.86799	0.580263	-0.165275	-542.48	3900000	3950000
CAMWBO010000009.1	79	1.32459	1.57084	0.827255	0.553031	-0.246253	-808.273	3950000	4000000
CAMWBO010000009.1	80	1.31926	1.51166	0.864658	0.578036	-0.192392	-631.487	4000000	4050000
CAMWBO010000009.1	81	2.13168	2.25748	0.94535	0.631979	-0.125797	-412.902	4050000	4100000
CAMWBO010000009.1	82	2.07535	2.2359	0.92454	0.618068	-0.160546	-526.957	4100000	4150000
CAMWBO010000009.1	83	1.06439	1.2288	0.862242	0.576421	-0.164411	-539.644	4150000	4200000
CAMWBO010000009.1	84	1.62337	1.78903	0.92088	0.615621	-0.165657	-543.735	4200000	4250000
CAMWBO010000009.1	85	1.52233	1.54152	0.987579	0.66021	-0.0191833	-62.9652	4250000	4300000
CAMWBO010000009.1	86	1.0494	1.14222	0.917766	0.613539	-0.0928196	-304.66	4300000	4350000
CAMWBO010000009.1	87	0.964979	1.06697	0.890001	0.594978	-0.101989	-334.757	4350000	4400000
CAMWBO010000009.1	88	1.21506	1.20943	0.995297	0.66537	0.00563458	18.4943	4400000	4450000
CAMWBO010000009.1	89	0.872405	0.956374	0.954108	0.637834	-0.083968	-275.607	4450000	4500000
CAMWBO010000009.1	90	0.891952	0.846156	1.12639	0.753008	0.045796	150.316	4500000	4550000
CAMWBO010000009.1	91	0.924553	0.990373	1.05852	0.707632	-0.0658201	-216.04	4550000	4600000
CAMWBO010000009.1	92	0.954036	1.06317	0.898215	0.600469	-0.109139	-358.224	4600000	4650000
CAMWBO010000009.1	93	0.894825	1.01206	0.853593	0.570638	-0.117234	-384.795	4650000	4700000
CAMWBO010000009.1	94	1.22709	1.12378	1.10666	0.739819	0.103311	339.095	4700000	4750000
CAMWBO010000009.1	95	1.06517	1.0392	1.00784	0.673752	0.0259696	85.2397	4750000	4800000
CAMWBO010000009.1	96	0.974284	0.863541	1.0417	0.69639	0.110744	363.492	4800000	4850000
CAMWBO010000009.1	97	1.0903	0.948494	1.17852	0.787857	0.141806	465.447	4850000	4900000
CAMWBO010000009.1	98	0.597477	0.653422	0.903713	0.604145	-0.0559448	-183.627	4900000	4950000
CAMWBO010000009.1	99	1.2291	1.19781	1.03376	0.691085	0.0312892	102.7	4950000	5000000
CAMWBO010000009.1	100	1.21418	1.23233	1.02825	0.687401	-0.0181535	-59.5849	5000000	5050000
CAMWBO010000009.1	101	0.994718	0.905628	1.09123	0.729504	0.0890895	292.417	5050000	5100000
CAMWBO010000009.1	102	1.24916	1.2404	1.077	0.719988	0.00876404	28.7661	5100000	5150000
CAMWBO010000009.1	103	0.94025	0.933142	1.03397	0.69122	0.00710824	23.3313	5150000	5200000
CAMWBO010000009.1	104	0.506797	0.427576	1.25757	0.8407	0.0792205	260.024	5200000	5250000
CAMWBO010000009.1	105	0.984653	0.893836	1.12965	0.755187	0.0908166	298.086	5250000	5300000
CAMWBO010000009.1	106	1.11097	1.05774	1.04772	0.700417	0.0532271	174.707	5300000	5350000
CAMWBO010000009.1	107	1.03302	0.78392	1.61297	1.07829	0.249101	817.621	5350000	5400000
CAMWBO010000009.1	108	0.521217	0.137125	8.98577	6.00711	0.384092	1260.7	5400000	5450000
CAMWBO010000009.1	109	0.71961	0.562474	1.50117	1.00355	0.157136	515.764	5450000	5500000
CAMWBO010000009.1	110	0.639304	0.422091	1.73764	1.16164	0.217213	712.956	5500000	5550000
CAMWBO010000009.1	111	0.768671	0.61717	1.38067	0.922999	0.151501	497.27	5550000	5600000
CAMWBO010000009.1	112	1.27626	1.39124	0.937887	0.62699	-0.114978	-377.392	5600000	5650000
CAMWBO010000009.1	113	1.29202	1.26136	1.03312	0.690657	0.0306606	100.637	5650000	5700000
CAMWBO010000009.1	114	1.31276	1.2411	1.11762	0.747146	0.0716579	235.202	5700000	5750000
CAMWBO010000009.1	115	1.38582	1.43688	0.993385	0.664091	-0.0510654	-167.611	5750000	5800000
CAMWBO010000009.1	116	1.92168	1.65433	1.1983	0.801083	0.267357	877.543	5800000	5850000
CAMWBO010000009.1	117	1.33565	1.50062	0.89565	0.598754	-0.164972	-541.484	5850000	5900000
CAMWBO010000009.1	118	1.53252	1.5021	1.03306	0.690614	0.0304141	99.8277	5900000	5950000
CAMWBO010000009.1	119	1.44999	1.50019	0.964346	0.644679	-0.0502029	-164.78	5950000	6000000
CAMWBO010000009.1	120	1.23932	1.21552	1.05528	0.705471	0.0237986	78.1138	6000000	6050000
CAMWBO010000009.1	121	1.28272	1.28793	0.927577	0.620098	-0.00520607	-17.0878	6050000	6100000
CAMWBO010000009.1	122	1.52091	1.83716	0.827677	0.553313	-0.316252	-1038.03	6100000	6150000
CAMWBO010000009.1	123	1.31727	1.41936	0.925237	0.618533	-0.102093	-335.099	6150000	6200000
CAMWBO010000009.1	124	1.70705	1.75673	0.976588	0.652862	-0.0496803	-163.065	6200000	6250000
CAMWBO010000009.1	125	1.80178	1.78653	1.01933	0.681434	0.0152541	50.0683	6250000	6300000
CAMWBO010000009.1	126	1.56641	1.56014	1.01837	0.680794	0.00626737	20.5713	6300000	6350000
CAMWBO010000009.1	127	1.57541	1.72203	0.931743	0.622883	-0.146624	-481.262	6350000	6400000
CAMWBO010000009.1	128	1.74062	1.78933	0.978882	0.654396	-0.0487072	-159.871	6400000	6450000
CAMWBO010000009.1	129	1.15778	1.24566	0.931173	0.622502	-0.0878841	-288.461	6450000	6500000
CAMWBO010000009.1	130	1.08569	1.22877	0.897426	0.599942	-0.143082	-469.636	6500000	6550000
CAMWBO010000009.1	131	1.29337	1.30671	1.02334	0.68412	-0.0133379	-43.7789	6550000	6600000
CAMWBO010000009.1	132	1.44139	1.32321	1.1126	0.743786	0.118178	387.893	6600000	6650000
CAMWBO010000009.1	133	1.15752	1.05644	1.07326	0.717489	0.101084	331.785	6650000	6700000
CAMWBO010000009.1	134	1.19386	1.15582	1.33681	0.893678	0.0380393	124.856	6700000	6750000
CAMWBO010000009.1	135	1.53922	1.67908	0.922756	0.616875	-0.139859	-459.058	6750000	6800000
CAMWBO010000009.1	136	0.971056	0.923416	1.09898	0.734684	0.0476408	156.371	6800000	6850000
CAMWBO010000009.1	137	0.838681	0.983417	0.804217	0.53763	-0.144736	-475.064	6850000	6900000
CAMWBO010000009.1	138	1.18722	1.19775	1.00257	0.670233	-0.0105357	-34.5811	6900000	6950000
CAMWBO010000009.1	139	1.65355	1.53401	1.11255	0.743758	0.119534	392.344	6950000	7000000
CAMWBO010000009.1	140	1.58544	1.68843	0.934654	0.624829	-0.102995	-338.058	7000000	7050000
CAMWBO010000009.1	141	1.02735	1.20193	0.879025	0.58764	-0.174571	-572.992	7050000	7100000
CAMWBO010000009.1	142	1.30478	1.40129	0.939566	0.628113	-0.0965123	-316.781	7100000	7150000
CAMWBO010000009.1	143	1.2075	1.38391	0.887714	0.593449	-0.176413	-579.039	7150000	7200000
CAMWBO010000009.1	144	0.452314	1.12279	0.371795	0.24855	-0.670472	-2200.68	7200000	7250000
CAMWBO010000009.1	145	0.637156	0.751987	0.900554	0.602032	-0.114831	-376.908	7250000	7300000
CAMWBO010000009.1	146	1.70464	1.6154	1.09413	0.731441	0.0892354	292.896	7300000	7350000
CAMWBO010000009.1	147	1.4049	1.39945	1.04395	0.697895	0.00545565	17.907	7350000	7400000
CAMWBO010000009.1	148	1.39147	1.40552	1.0836	0.724404	-0.0140507	-46.1184	7400000	7450000
CAMWBO010000009.1	149	1.18615	1.09759	1.08988	0.728601	0.0885605	290.681	7450000	7500000
CAMWBO010000009.1	150	0.715444	0.630687	1.54885	1.03543	0.0847577	278.199	7500000	7550000
CAMWBO010000009.1	151	0.996581	1.09557	0.886503	0.592639	-0.0989841	-324.894	7550000	7600000
CAMWBO010000009.1	152	1.36902	1.4188	0.976281	0.652657	-0.0497839	-163.405	7600000	7650000
CAMWBO010000009.1	153	0.813616	0.792775	1.01416	0.67798	0.0208414	68.4074	7650000	7700000
CAMWBO010000009.1	154	1.07104	1.25743	0.890282	0.595166	-0.186387	-611.775	7700000	7750000
CAMWBO010000009.1	155	1.21136	1.13224	1.0733	0.717517	0.079124	259.707	7750000	7800000
CAMWBO010000009.1	156	0.885559	0.793979	1.24395	0.831599	0.0915796	300.59	7800000	7850000
CAMWBO010000009.1	157	0.77777	0.746617	1.44195	0.963965	0.0311529	102.253	7850000	7900000
CAMWBO010000009.1	158	1.42446	1.29681	1.14366	0.764549	0.127646	418.971	7900000	7950000
CAMWBO010000009.1	159	1.27557	1.43588	0.903739	0.604162	-0.16031	-526.184	7950000	8000000
CAMWBO010000009.1	160	0.660099	0.803387	1.26117	0.843112	-0.143288	-470.312	8000000	8050000
CAMWBO010000009.1	161	0.769569	0.831188	0.987621	0.660238	-0.0616185	-202.249	8050000	8100000
CAMWBO010000009.1	162	0.144003	0.160185	0.981528	0.656165	-0.0161816	-53.1125	8100000	8150000
CAMWBO010000009.1	163	0.472871	0.485893	1.14264	0.763868	-0.0130222	-42.7427	8150000	8200000
CAMWBO010000009.1	164	1.51376	1.5174	1.03291	0.690513	-0.00363544	-11.9325	8200000	8250000
CAMWBO010000009.1	165	0.853243	0.962016	1.18052	0.789194	-0.108773	-357.025	8250000	8300000
CAMWBO010000009.1	166	1.19594	1.20907	1.03193	0.689861	-0.0131352	-43.1136	8300000	8350000
CAMWBO010000009.1	167	1.43821	1.30404	1.17658	0.786559	0.134164	440.365	8350000	8400000
CAMWBO010000009.1	168	1.44374	1.44499	1.00892	0.674479	-0.00124911	-4.09992	8400000	8450000
CAMWBO010000009.1	169	1.32815	1.32361	1.07178	0.716502	0.00453632	14.8895	8450000	8500000
CAMWBO010000009.1	170	0.836687	0.83993	1.78038	1.19021	-0.0032431	-10.6448	8500000	8550000
CAMWBO010000009.1	171	1.22434	1.3028	0.902395	0.603263	-0.0784533	-257.506	8550000	8590000
CAMWBO010000010.1	0	1.75786	1.58305	1.15766	0.773912	0.174817	573.798	0	50000
CAMWBO010000010.1	1	1.54634	1.37264	1.19269	0.797327	0.1737	570.131	50000	100000
CAMWBO010000010.1	2	1.21187	1.18443	1.09492	0.731968	0.0274425	90.0741	100000	150000
CAMWBO010000010.1	3	1.18994	1.11205	1.09727	0.733542	0.077898	255.683	150000	200000
CAMWBO010000010.1	4	0.996182	0.865244	1.29163	0.863474	0.130938	429.775	200000	250000
CAMWBO010000010.1	5	1.01712	0.936502	1.13666	0.759874	0.0806195	264.616	250000	300000
CAMWBO010000010.1	6	0.98668	0.801239	1.93851	1.29592	0.185441	608.671	300000	350000
CAMWBO010000010.1	7	0.915001	0.794576	1.61427	1.07916	0.120425	395.269	350000	400000
CAMWBO010000010.1	8	0.21843	0.171105	1.09267	0.730462	0.047325	155.334	400000	450000
CAMWBO010000010.1	9	0.599206	0.548638	1.45609	0.973413	0.0505678	165.978	450000	500000
CAMWBO010000010.1	10	0.932639	1.07399	0.898019	0.600338	-0.141347	-463.94	500000	550000
CAMWBO010000010.1	11	0.885153	0.879507	1.01367	0.677654	0.00564641	18.5331	550000	600000
CAMWBO010000010.1	12	0.649121	0.453645	5.37208	3.59131	0.195476	641.608	600000	650000
CAMWBO010000010.1	13	0.54667	0.411443	6.47088	4.32587	0.135227	443.852	650000	700000
CAMWBO010000010.1	14	1.17014	1.05689	1.12468	0.751862	0.113256	371.737	700000	750000
CAMWBO010000010.1	15	1.2126	1.14702	1.08527	0.725517	0.0655782	215.246	750000	800000
CAMWBO010000010.1	16	1.13979	1.21178	1.05289	0.703868	-0.0719917	-236.297	800000	850000
CAMWBO010000010.1	17	1.10857	1.09589	0.959243	0.641267	0.0126779	41.6124	850000	900000
CAMWBO010000010.1	18	0.485017	0.3677	1.34652	0.90017	0.117317	385.069	900000	950000
CAMWBO010000010.1	19	0.917945	0.835816	1.17267	0.783944	0.0821292	269.572	950000	1000000
CAMWBO010000010.1	20	0.725192	0.741596	1.08127	0.722846	-0.0164038	-53.8419	1000000	1050000
CAMWBO010000010.1	21	1.42168	1.54556	0.920261	0.615207	-0.123877	-406.601	1050000	1100000
CAMWBO010000010.1	22	1.04522	1.24926	0.823078	0.550239	-0.204037	-669.709	1100000	1150000
CAMWBO010000010.1	23	0.824145	0.59276	1.99384	1.33291	0.231384	759.469	1150000	1200000
CAMWBO010000010.1	24	0.863399	0.757495	1.26548	0.845992	0.105904	347.608	1200000	1250000
CAMWBO010000010.1	25	1.09887	1.00564	1.11193	0.743338	0.0932291	306.005	1250000	1300000
CAMWBO010000010.1	26	0.847391	0.879849	0.965757	0.645622	-0.0324583	-106.537	1300000	1350000
CAMWBO010000010.1	27	0.643085	0.56646	1.10254	0.737061	0.0766246	251.504	1350000	1400000
CAMWBO010000010.1	28	0.881565	0.836743	1.11628	0.74625	0.0448218	147.118	1400000	1450000
CAMWBO010000010.1	29	0.799109	0.636612	1.39178	0.930422	0.162496	533.359	1450000	1500000
CAMWBO010000010.1	30	1.52456	1.34973	1.15465	0.771898	0.174835	573.858	1500000	1550000
CAMWBO010000010.1	31	0.923598	0.977128	1.0604	0.708892	-0.0535304	-175.702	1550000	1600000
CAMWBO010000010.1	32	1.34711	1.65183	0.848542	0.567262	-0.304723	-1000.19	1600000	1650000
CAMWBO010000010.1	33	1.26432	1.61594	0.756418	0.505676	-0.351616	-1154.1	1650000	1700000
CAMWBO010000010.1	34	1.37725	1.53142	0.907858	0.606915	-0.154164	-506.011	1700000	1750000
CAMWBO010000010.1	35	0.799165	1.05205	0.774897	0.518029	-0.252881	-830.027	1750000	1800000
CAMWBO010000010.1	36	0.420122	0.421944	1.17938	0.788428	-0.00182185	-5.97983	1800000	1850000
CAMWBO010000010.1	37	1.18235	1.09771	1.10451	0.738379	0.0846469	277.835	1850000	1900000
CAMWBO010000010.1	38	0.970808	1.09104	0.917135	0.613117	-0.12023	-394.63	1900000	1950000
CAMWBO010000010.1	39	0.678472	0.70744	1.06785	0.713874	-0.028968	-95.0811	1950000	2000000
CAMWBO010000010.1	40	0.497117	0.518504	1.01979	0.681743	-0.0213868	-70.1977	2000000	2050000
CAMWBO010000010.1	41	0.578776	0.654808	0.94907	0.634466	-0.0760319	-249.558	2050000	2100000
CAMWBO010000010.1	42	0.405275	0.242198	24.2028	16.1799	0.163076	535.263	2100000	2150000
CAMWBO010000010.1	43	0.441832	0.449807	1.10338	0.737625	-0.00797566	-26.1784	2150000	2200000
CAMWBO010000010.1	44	0.615772	0.815556	0.796631	0.532558	-0.199784	-655.749	2200000	2250000
CAMWBO010000010.1	45	0.849333	0.766668	1.12053	0.749087	0.0826651	271.331	2250000	2300000
CAMWBO010000010.1	46	0.878997	0.820422	1.36915	0.915296	0.0585745	192.258	2300000	2350000
CAMWBO010000010.1	47	0.774272	1.12121	0.699916	0.467904	-0.346939	-1138.75	2350000	2400000
CAMWBO010000010.1	48	1.25823	1.38295	0.877036	0.586311	-0.124719	-409.364	2400000	2450000
CAMWBO010000010.1	49	0.278519	0.33142	0.898182	0.600447	-0.0529018	-173.639	2450000	2500000
CAMWBO010000010.1	50	0.336313	0.216319	15.4288	10.3144	0.119994	393.855	2500000	2550000
CAMWBO010000010.1	51	0.0894224	0.260267	0.336124	0.224704	-0.170845	-560.76	2550000	2600000
CAMWBO010000010.1	52	0.490399	0.61683	0.835837	0.558768	-0.126431	-414.982	2600000	2650000
CAMWBO010000010.1	53	0.700665	0.897653	0.783121	0.523527	-0.196988	-646.57	2650000	2700000
CAMWBO010000010.1	54	1.23748	1.3345	0.993178	0.663953	-0.0970218	-318.453	2700000	2750000
CAMWBO010000010.1	55	1.07513	0.902881	1.28737	0.860624	0.17225	565.373	2750000	2800000
CAMWBO010000010.1	56	1.30565	1.21669	1.18957	0.795245	0.0889614	291.997	2800000	2850000
CAMWBO010000010.1	57	1.31545	1.34857	0.941713	0.629548	-0.0331193	-108.707	2850000	2900000
CAMWBO010000010.1	58	1.77798	1.63873	1.08566	0.725778	0.13925	457.057	2900000	2950000
CAMWBO010000010.1	59	1.88801	2.13258	0.902372	0.603248	-0.244572	-802.756	2950000	3000000
CAMWBO010000010.1	60	0.903817	0.760506	1.19684	0.800103	0.14331	470.385	3000000	3050000
CAMWBO010000010.1	61	1.18808	1.15792	1.04141	0.696194	0.0301581	98.9876	3050000	3100000
CAMWBO010000010.1	62	1.221	1.13017	1.10502	0.738724	0.0908241	298.111	3100000	3150000
CAMWBO010000010.1	63	1.10439	1.23664	0.911486	0.609341	-0.132255	-434.1	3150000	3200000
CAMWBO010000010.1	64	0.807289	0.801706	0.97936	0.654715	0.00558263	18.3238	3200000	3250000
CAMWBO010000010.1	65	0.858379	0.781	1.11279	0.743914	0.0773791	253.98	3250000	3300000
CAMWBO010000010.1	66	0.954503	1.36518	0.696955	0.465924	-0.410675	-1347.95	3300000	3350000
CAMWBO010000010.1	67	0.852741	0.779465	1.11203	0.74341	0.0732757	240.512	3350000	3400000
CAMWBO010000010.1	68	0.84618	1.0953	0.767637	0.513176	-0.249123	-817.692	3400000	3450000
CAMWBO010000010.1	69	0.75263	0.842893	0.88929	0.594502	-0.0902628	-296.268	3450000	3500000
CAMWBO010000010.1	70	0.886631	1.15496	0.759686	0.50786	-0.268326	-880.721	3500000	3550000
CAMWBO010000010.1	71	1.08017	1.12587	0.958125	0.64052	-0.0457033	-150.011	3550000	3600000
CAMWBO010000010.1	72	0.994326	1.04595	0.962306	0.643315	-0.051621	-169.435	3600000	3650000
CAMWBO010000010.1	73	0.965851	1.19549	0.810992	0.542159	-0.229643	-753.755	3650000	3700000
CAMWBO010000010.1	74	0.921188	1.07079	0.896144	0.599084	-0.149606	-491.051	3700000	3750000
CAMWBO010000010.1	75	0.769676	0.372099	2.20381	1.47328	0.397577	1304.96	3750000	3800000
CAMWBO010000010.1	76	0.889274	0.447025	2.07604	1.38786	0.442249	1451.59	3800000	3850000
CAMWBO010000010.1	77	0.791178	0.372817	2.17932	1.45691	0.418362	1373.18	3850000	3900000
CAMWBO010000010.1	78	0.926686	0.68112	1.38029	0.922741	0.245566	806.017	3900000	3950000
CAMWBO010000010.1	79	0.765334	0.449525	2.06004	1.37717	0.315809	1036.58	3950000	4000000
CAMWBO010000010.1	80	0.633012	0.363657	1.81832	1.21557	0.269355	884.1	4000000	4050000
CAMWBO010000010.1	81	0.559195	0.321026	3.40918	2.27909	0.238169	781.738	4050000	4100000
CAMWBO010000010.1	82	0.714902	0.341066	2.22606	1.48815	0.373836	1227.04	4100000	4150000
CAMWBO010000010.1	83	0.773324	0.358488	2.23295	1.49276	0.414836	1361.61	4150000	4200000
CAMWBO010000010.1	84	0.703223	0.399517	1.83642	1.22767	0.303706	996.849	4200000	4250000
CAMWBO010000010.1	85	0.883915	0.704571	1.34314	0.897907	0.179344	588.658	4250000	4300000
CAMWBO010000010.1	86	0.867753	0.786948	1.10765	0.740481	0.0808055	265.227	4300000	4350000
CAMWBO010000010.1	87	0.965568	0.895632	1.08212	0.723414	0.069936	229.55	4350000	4400000
CAMWBO010000010.1	88	0.612952	0.701607	0.897558	0.60003	-0.0886543	-290.989	4400000	4450000
CAMWBO010000010.1	89	0.640367	0.639738	1.08735	0.726908	0.000629139	2.06501	4450000	4500000
CAMWBO010000010.1	90	0.751216	0.552557	1.34549	0.899481	0.198659	652.056	4500000	4550000
CAMWBO010000010.1	91	0.576024	0.433044	1.33864	0.894902	0.14298	469.301	4550000	4600000
CAMWBO010000010.1	92	0.617584	0.628884	1.0613	0.70949	-0.0112995	-37.088	4600000	4650000
CAMWBO010000010.1	93	0.653058	0.796226	0.845292	0.565089	-0.143168	-469.917	4650000	4700000
CAMWBO010000010.1	94	0.683927	0.80454	0.88239	0.58989	-0.120613	-395.885	4700000	4750000
CAMWBO010000010.1	95	0.668441	0.759586	0.881392	0.589223	-0.0911452	-299.164	4750000	4800000
CAMWBO010000010.1	96	0.572996	0.815675	0.711666	0.475758	-0.24268	-796.543	4800000	4850000
CAMWBO010000010.1	97	1.29577	1.29728	0.999713	0.668322	-0.0015115	-4.96117	4850000	4900000
CAMWBO010000010.1	98	1.00923	1.3684	0.729179	0.487466	-0.359172	-1178.91	4900000	4950000
CAMWBO010000010.1	99	0.94161	1.34286	0.698912	0.467232	-0.40125	-1317.02	4950000	5000000
CAMWBO010000010.1	100	0.734305	1.17289	0.620781	0.415	-0.438587	-1439.57	5000000	5050000
CAMWBO010000010.1	101	0.693457	1.12261	0.614432	0.410756	-0.429157	-1408.61	5050000	5100000
CAMWBO010000010.1	102	1.03103	1.14803	1.06211	0.710034	-0.116991	-383.998	5100000	5150000
CAMWBO010000010.1	103	1.18621	1.1373	1.07492	0.718599	0.0489037	160.516	5150000	5200000
CAMWBO010000010.1	104	1.10248	1.07493	1.02264	0.683651	0.0275426	90.4027	5200000	5250000
CAMWBO010000010.1	105	1.1688	1.27358	0.92031	0.61524	-0.104775	-343.903	5250000	5300000
CAMWBO010000010.1	106	0.878154	1.11857	0.767006	0.512754	-0.240417	-789.117	5300000	5350000
CAMWBO010000010.1	107	1.15343	1.13893	1.05177	0.703123	0.0145013	47.5975	5350000	5400000
CAMWBO010000010.1	108	1.13636	1.14113	1.02112	0.682635	-0.00476394	-15.6366	5400000	5450000
CAMWBO010000010.1	109	0.423578	0.631433	0.670216	0.448048	-0.207854	-682.237	5450000	5500000
CAMWBO010000010.1	110	1.00626	1.12568	0.901202	0.602466	-0.119415	-391.955	5500000	5550000
CAMWBO010000010.1	111	1.23003	1.25355	1.01658	0.679597	-0.0235168	-77.189	5550000	5600000
CAMWBO010000010.1	112	0.71935	0.684197	1.08338	0.724252	0.0351528	115.381	5600000	5650000
CAMWBO010000010.1	113	0.837019	0.752704	1.0654	0.712234	0.0843159	276.749	5650000	5700000
CAMWBO010000010.1	114	1.0028	0.874532	1.21372	0.81139	0.128269	421.016	5700000	5750000
CAMWBO010000010.1	115	0.567626	0.163035	15.3593	10.2679	0.404591	1327.98	5750000	5800000
CAMWBO010000010.1	116	0.537923	0.144578	111.101	74.2727	0.393344	1291.07	5800000	5850000
CAMWBO010000010.1	117	0.625639	0.272624	29.0529	19.4222	0.353016	1158.7	5850000	5900000
CAMWBO010000010.1	118	0.622218	0.378181	1.807	1.208	0.244037	801	5900000	5950000
CAMWBO010000010.1	119	0.627004	0.338317	3.28727	2.19758	0.288688	947.555	5950000	6000000
CAMWBO010000010.1	120	0.673073	0.412484	2.50932	1.67751	0.26059	855.329	6000000	6050000
CAMWBO010000010.1	121	0.476314	0.245682	7.42239	4.96197	0.230631	756.998	6050000	6100000
CAMWBO010000010.1	122	0.341321	0.279321	1.51278	1.01132	0.062	203.502	6100000	6150000
CAMWBO010000010.1	123	0.384459	0.463744	0.895135	0.59841	-0.079285	-260.236	6150000	6200000
CAMWBO010000010.1	124	0.716899	0.716431	1.0747	0.718449	0.000468124	1.53652	6200000	6250000
CAMWBO010000010.1	125	0.449094	0.412896	1.29398	0.865046	0.0361985	118.814	6250000	6300000
CAMWBO010000010.1	126	1.19855	0.947309	1.55837	1.04179	0.251246	824.661	6300000	6350000
CAMWBO010000010.1	127	1.30392	1.47219	0.93837	0.627313	-0.168265	-552.295	6350000	6400000
CAMWBO010000010.1	128	1.28852	1.27262	1.02826	0.687409	0.015897	52.1785	6400000	6450000
CAMWBO010000010.1	129	1.11387	1.00747	1.17344	0.784463	0.106401	349.24	6450000	6500000
CAMWBO010000010.1	130	0.854276	0.813366	1.03209	0.689964	0.0409101	134.279	6500000	6550000
CAMWBO010000010.1	131	0.696714	0.739872	0.997711	0.666983	-0.0431576	-141.656	6550000	6600000
CAMWBO010000010.1	132	0.320477	0.499215	0.65759	0.439608	-0.178738	-586.668	6600000	6650000
CAMWBO010000010.1	133	0.575924	0.442998	1.48442	0.992358	0.132926	436.299	6650000	6700000
CAMWBO010000010.1	134	0.640219	0.50887	1.36594	0.913148	0.131349	431.125	6700000	6750000
CAMWBO010000010.1	135	0.750085	0.767422	1.0227	0.683692	-0.0173376	-56.907	6750000	6800000
CAMWBO010000010.1	136	0.474681	0.505324	1.05577	0.7058	-0.0306424	-100.577	6800000	6850000
CAMWBO010000010.1	137	0.561969	0.363354	2.13615	1.42804	0.198615	651.909	6850000	6900000
CAMWBO010000010.1	138	0.946863	1.22724	0.751396	0.502318	-0.280372	-920.261	6900000	6950000
CAMWBO010000010.1	139	0.896281	1.31387	0.686219	0.458747	-0.41759	-1370.65	6950000	7000000
CAMWBO010000010.1	140	0.561084	0.535481	1.09423	0.731504	0.0256033	84.0373	7000000	7050000
CAMWBO010000010.1	141	0.380828	0.202863	2.12237	1.41883	0.177966	584.133	7050000	7100000
CAMWBO010000010.1	142	0.204325	0.138477	3.06136	2.04656	0.0658484	216.133	7100000	7150000
CAMWBO010000010.1	143	0.342137	1.13761	0.626275	0.418673	-0.795473	-2610.97	7150000	7200000
CAMWBO010000010.1	144	0.663082	0.828753	0.895344	0.598549	-0.165671	-543.778	7200000	7250000
CAMWBO010000010.1	145	0.837209	0.926574	1.3068	0.873615	-0.0893653	-293.322	7250000	7300000
CAMWBO010000010.1	146	0.819367	0.955019	0.864288	0.577788	-0.135652	-445.248	7300000	7350000
CAMWBO010000010.1	147	0.835914	0.709078	2.18295	1.45933	0.126836	416.313	7350000	7400000
CAMWBO010000010.1	148	0.62899	0.558677	1.40116	0.936693	0.070313	230.787	7400000	7450000
CAMWBO010000010.1	149	0.818258	0.727889	1.18459	0.791912	0.0903695	296.618	7450000	7500000
CAMWBO010000010.1	150	0.949698	1.57401	0.607519	0.406135	-0.624312	-2049.17	7500000	7550000
CAMWBO010000010.1	151	0.992987	1.11363	0.917164	0.613136	-0.120645	-395.992	7550000	7600000
CAMWBO010000010.1	152	0.741347	0.890344	0.772	0.516093	-0.148998	-489.052	7600000	7650000
CAMWBO010000010.1	153	1.26853	1.2823	0.992934	0.66379	-0.0137687	-45.1928	7650000	7665000
CAMWBO010000011.1	0	0.997021	1.13377	0.803571	0.537198	-0.136749	-448.848	0	50000
CAMWBO010000011.1	1	1.7124	1.71492	1.00341	0.670796	-0.00251981	-8.27072	50000	100000
CAMWBO010000011.1	2	1.86974	1.73712	1.08269	0.72379	0.132622	435.304	100000	150000
CAMWBO010000011.1	3	1.46708	1.47092	1.00797	0.673842	-0.00383772	-12.5965	150000	200000
CAMWBO010000011.1	4	1.84506	1.92648	0.963387	0.644037	-0.0814209	-267.247	200000	250000
CAMWBO010000011.1	5	1.10171	1.23115	0.859559	0.574627	-0.129441	-424.862	250000	300000
CAMWBO010000011.1	6	1.30546	1.42923	0.866304	0.579136	-0.12377	-406.249	300000	350000
CAMWBO010000011.1	7	1.18295	1.2072	0.963776	0.644297	-0.0242488	-79.5916	350000	400000
CAMWBO010000011.1	8	0.777844	0.766535	1.10624	0.739535	0.0113093	37.1204	400000	450000
CAMWBO010000011.1	9	1.36106	1.34452	1.02417	0.684672	0.016534	54.2693	450000	500000
CAMWBO010000011.1	10	1.1167	1.10493	1.0085	0.674196	0.0117695	38.6309	500000	550000
CAMWBO010000011.1	11	1.3733	1.45277	0.942849	0.630307	-0.0794725	-260.851	550000	600000
CAMWBO010000011.1	12	1.25343	1.36412	0.941149	0.629171	-0.110682	-363.291	600000	650000
CAMWBO010000011.1	13	1.5396	1.69707	0.913319	0.610566	-0.157479	-516.89	650000	700000
CAMWBO010000011.1	14	1.27106	1.59512	0.806748	0.539322	-0.324057	-1063.65	700000	750000
CAMWBO010000011.1	15	1.09197	1.46149	0.697912	0.466564	-0.369519	-1212.87	750000	800000
CAMWBO010000011.1	16	1.67444	1.92692	0.832267	0.556382	-0.25248	-828.71	800000	850000
CAMWBO010000011.1	17	1.2409	1.4762	0.819348	0.547745	-0.235301	-772.325	850000	900000
CAMWBO010000011.1	18	1.68816	1.80459	0.968629	0.647541	-0.116431	-382.161	900000	950000
CAMWBO010000011.1	19	1.40677	1.22321	1.20919	0.808357	0.183563	602.507	950000	1000000
CAMWBO010000011.1	20	1.85698	1.60188	1.18048	0.789169	0.255097	837.302	1000000	1050000
CAMWBO010000011.1	21	1.2156	1.2828	0.957168	0.63988	-0.0672052	-220.586	1050000	1100000
CAMWBO010000011.1	22	1.28952	1.50225	0.865412	0.57854	-0.212728	-698.232	1100000	1150000
CAMWBO010000011.1	23	1.16578	1.21123	0.938572	0.627448	-0.0454528	-149.189	1150000	1200000
CAMWBO010000011.1	24	1.59125	1.605	0.986082	0.659209	-0.013753	-45.1412	1200000	1250000
CAMWBO010000011.1	25	1.52558	1.4986	1.02675	0.686396	0.0269787	88.5519	1250000	1300000
CAMWBO010000011.1	26	1.67839	1.35358	1.26358	0.844717	0.324817	1066.14	1300000	1350000
CAMWBO010000011.1	27	1.051	1.26781	0.781633	0.522532	-0.216817	-711.654	1350000	1400000
CAMWBO010000011.1	28	1.89953	1.93802	0.985862	0.659062	-0.0384913	-126.339	1400000	1450000
CAMWBO010000011.1	29	0.678668	0.631684	1.69773	1.13496	0.0469843	154.216	1450000	1500000
CAMWBO010000011.1	30	1.26361	1.19466	1.18641	0.793133	0.0689407	226.283	1500000	1550000
CAMWBO010000011.1	31	0.93925	0.398729	2.8802	1.92545	0.540521	1774.14	1550000	1600000
CAMWBO010000011.1	32	1.01803	0.654693	3.89528	2.60405	0.363339	1192.58	1600000	1650000
CAMWBO010000011.1	33	0.769919	0.435851	2.11931	1.41679	0.334068	1096.51	1650000	1700000
CAMWBO010000011.1	34	1.53626	1.4233	1.08507	0.725382	0.112964	370.781	1700000	1750000
CAMWBO010000011.1	35	1.45734	1.2607	1.1909	0.79613	0.196647	645.451	1750000	1800000
CAMWBO010000011.1	36	1.15637	1.22117	1.04044	0.695546	-0.0648039	-212.705	1800000	1850000
CAMWBO010000011.1	37	1.9479	1.9818	0.977946	0.65377	-0.0339022	-111.277	1850000	1900000
CAMWBO010000011.1	38	1.62878	1.56534	1.04299	0.697256	0.0634408	208.231	1900000	1950000
CAMWBO010000011.1	39	1.22593	1.3023	1.03285	0.690475	-0.076374	-250.681	1950000	2000000
CAMWBO010000011.1	40	1.76835	1.74457	1.02334	0.684117	0.0237805	78.0543	2000000	2050000
CAMWBO010000011.1	41	0.663321	0.651011	2.09095	1.39783	0.0123098	40.4043	2050000	2100000
CAMWBO010000011.1	42	1.68497	1.65998	1.01892	0.681163	0.0249899	82.0239	2100000	2150000
CAMWBO010000011.1	43	1.61225	1.72698	0.935712	0.625536	-0.114725	-376.56	2150000	2200000
CAMWBO010000011.1	44	1.64118	1.8149	0.90077	0.602177	-0.173722	-570.206	2200000	2250000
CAMWBO010000011.1	45	1.46215	1.10576	1.37557	0.919586	0.356385	1169.76	2250000	2300000
CAMWBO010000011.1	46	1.34727	0.994725	1.61591	1.08026	0.352548	1157.16	2300000	2350000
CAMWBO010000011.1	47	1.16492	0.728174	2.96808	1.9842	0.436744	1433.52	2350000	2400000
CAMWBO010000011.1	48	1.60615	1.39853	1.15605	0.772838	0.207615	681.451	2400000	2450000
CAMWBO010000011.1	49	0.138491	0.128846	1.34016	0.895912	0.00964501	31.6577	2450000	2500000
CAMWBO010000011.1	50	1.26554	1.29031	0.970389	0.648718	-0.0247734	-81.3135	2500000	2550000
CAMWBO010000011.1	51	1.42779	1.50593	1.01556	0.678915	-0.0781357	-256.464	2550000	2600000
CAMWBO010000011.1	52	1.18079	1.22418	0.984147	0.657916	-0.0433921	-142.425	2600000	2650000
CAMWBO010000011.1	53	1.20036	1.28932	0.912587	0.610077	-0.0889598	-291.992	2650000	2700000
CAMWBO010000011.1	54	0.710952	0.673996	1.11533	0.745614	0.0369566	121.302	2700000	2750000
CAMWBO010000011.1	55	1.08464	1.25698	0.846636	0.565988	-0.172331	-565.638	2750000	2800000
CAMWBO010000011.1	56	0.902999	0.407297	2.36197	1.57901	0.495703	1627.04	2800000	2850000
CAMWBO010000011.1	57	0.289576	0.423316	0.563629	0.376794	-0.13374	-438.972	2850000	2900000
CAMWBO010000011.1	58	1.50312	1.29384	1.22022	0.815733	0.209273	686.894	2900000	2950000
CAMWBO010000011.1	59	1.20355	1.37873	0.867048	0.579634	-0.175186	-575.01	2950000	3000000
CAMWBO010000011.1	60	1.46518	1.36494	1.08663	0.726428	0.100242	329.022	3000000	3050000
CAMWBO010000011.1	61	1.47608	1.38111	1.11127	0.742901	0.0949701	311.719	3050000	3100000
CAMWBO010000011.1	62	1.60074	1.62929	0.988986	0.661151	-0.0285531	-93.7193	3100000	3150000
CAMWBO010000011.1	63	1.53769	1.41674	1.09367	0.731131	0.120952	396.998	3150000	3200000
CAMWBO010000011.1	64	1.50091	1.49872	1.01073	0.675686	0.00218366	7.16739	3200000	3250000
CAMWBO010000011.1	65	1.41437	1.38409	1.03331	0.69078	0.0302767	99.3767	3250000	3300000
CAMWBO010000011.1	66	1.73151	1.56987	1.12004	0.748764	0.161643	530.56	3300000	3350000
CAMWBO010000011.1	67	1.56426	1.67873	0.938011	0.627073	-0.114468	-375.717	3350000	3400000
CAMWBO010000011.1	68	0.987273	1.255	0.808047	0.54019	-0.267725	-878.749	3400000	3450000
CAMWBO010000011.1	69	1.43794	1.64413	0.879303	0.587826	-0.206192	-676.779	3450000	3500000
CAMWBO010000011.1	70	1.25622	1.35912	0.980595	0.655541	-0.102903	-337.758	3500000	3550000
CAMWBO010000011.1	71	1.46668	1.70309	0.860607	0.575328	-0.236403	-775.941	3550000	3600000
CAMWBO010000011.1	72	1.46924	1.6019	0.916581	0.612747	-0.132653	-435.405	3600000	3650000
CAMWBO010000011.1	73	1.34709	1.68235	0.798478	0.533793	-0.335254	-1100.4	3650000	3700000
CAMWBO010000011.1	74	1.37606	1.50972	0.928031	0.620401	-0.133654	-438.692	3700000	3750000
CAMWBO010000011.1	75	0.86314	0.855057	0.995492	0.6655	0.00808347	26.5323	3750000	3800000
CAMWBO010000011.1	76	1.74093	1.4483	1.20973	0.808724	0.292629	960.492	3800000	3850000
CAMWBO010000011.1	77	1.6132	1.45807	1.11659	0.746454	0.155133	509.191	3850000	3900000
CAMWBO010000011.1	78	1.45293	1.36166	1.07306	0.717353	0.0912723	299.582	3900000	3950000
CAMWBO010000011.1	79	1.34777	1.21352	1.13255	0.757126	0.134244	440.628	3950000	4000000
CAMWBO010000011.1	80	1.004	0.792951	1.39954	0.935612	0.211045	692.71	4000000	4050000
CAMWBO010000011.1	81	0.451677	0.258424	1.75917	1.17603	0.193252	634.309	4050000	4100000
CAMWBO010000011.1	82	0.862004	0.638666	1.65184	1.10428	0.223337	733.056	4100000	4150000
CAMWBO010000011.1	83	1.85992	1.90611	0.989271	0.661341	-0.0461866	-151.598	4150000	4200000
CAMWBO010000011.1	84	1.6207	1.57904	1.03424	0.691407	0.0416549	136.723	4200000	4250000
CAMWBO010000011.1	85	1.02255	0.78106	1.74563	1.16698	0.241494	792.652	4250000	4300000
CAMWBO010000011.1	86	0.614218	0.224943	2.73328	1.82723	0.389275	1277.71	4300000	4350000
CAMWBO010000011.1	87	0.893813	0.681745	1.35448	0.905489	0.212068	696.067	4350000	4400000
CAMWBO010000011.1	88	0.834466	0.650776	1.28144	0.856658	0.18369	602.922	4400000	4450000
CAMWBO010000011.1	89	0.752991	0.552732	1.5784	1.05518	0.200259	657.308	4450000	4500000
CAMWBO010000011.1	90	0.563023	0.263292	2.16654	1.44836	0.299731	983.802	4500000	4550000
CAMWBO010000011.1	91	0.781356	0.578187	1.55171	1.03734	0.203168	666.857	4550000	4600000
CAMWBO010000011.1	92	0.767185	0.546159	1.45391	0.971956	0.221026	725.469	4600000	4650000
CAMWBO010000011.1	93	0.75505	0.596167	1.27667	0.853471	0.158883	521.5	4650000	4700000
CAMWBO010000011.1	94	0.793308	0.643619	1.26198	0.843651	0.149689	491.323	4700000	4750000
CAMWBO010000011.1	95	0.817704	0.626957	1.31327	0.877936	0.190747	626.086	4750000	4800000
CAMWBO010000011.1	96	0.982984	0.805266	1.23691	0.826892	0.177718	583.32	4800000	4850000
CAMWBO010000011.1	97	0.777118	0.618565	1.28084	0.856261	0.158554	520.418	4850000	4900000
CAMWBO010000011.1	98	1.31432	1.20532	1.12725	0.753584	0.108995	357.753	4900000	4950000
CAMWBO010000011.1	99	0.489079	0.300735	2.45299	1.63986	0.188344	618.2	4950000	5000000
CAMWBO010000011.1	100	1.13944	0.853899	1.51996	1.01611	0.285544	937.236	5000000	5050000
CAMWBO010000011.1	101	0.65873	0.315264	2.98551	1.99585	0.343466	1127.35	5050000	5100000
CAMWBO010000011.1	102	1.02026	0.790049	1.29965	0.868833	0.230211	755.619	5100000	5150000
CAMWBO010000011.1	103	0.781967	0.556667	1.41956	0.948997	0.2253	739.5	5150000	5200000
CAMWBO010000011.1	104	0.663991	0.40411	2.00476	1.34021	0.259882	853.005	5200000	5250000
CAMWBO010000011.1	105	0.864924	0.634332	1.38832	0.928107	0.230593	756.871	5250000	5300000
CAMWBO010000011.1	106	0.868559	0.717011	1.23028	0.82246	0.151549	497.426	5300000	5350000
CAMWBO010000011.1	107	1.39673	1.1312	1.26322	0.844483	0.265531	871.549	5350000	5400000
CAMWBO010000011.1	108	1.22504	1.12678	1.1546	0.771868	0.098265	322.534	5400000	5450000
CAMWBO010000011.1	109	1.30121	1.08538	1.3217	0.883573	0.215833	708.426	5450000	5500000
CAMWBO010000011.1	110	0.406595	0.464218	1.81099	1.21067	-0.0576229	-189.135	5500000	5550000
CAMWBO010000011.1	111	0.149063	0.0589717	5.97513	3.99446	0.0900912	295.705	5550000	5600000
CAMWBO010000011.1	112	0.190141	0.118377	2.2158	1.48129	0.0717642	235.55	5600000	5650000
CAMWBO010000011.1	113	0.383215	0.290422	1.45336	0.971592	0.0927923	304.571	5650000	5700000
CAMWBO010000011.1	114	1.13321	1.58623	0.705625	0.47172	-0.453016	-1486.93	5700000	5750000
CAMWBO010000011.1	115	0.968926	1.01042	1.00962	0.674944	-0.0414993	-136.213	5750000	5800000
CAMWBO010000011.1	116	1.06271	0.886001	2.33174	1.5588	0.176709	580.008	5800000	5850000
CAMWBO010000011.1	117	0.813149	0.629076	2.07219	1.38528	0.184073	604.178	5850000	5900000
CAMWBO010000011.1	118	0.0988226	0.10491	1.23014	0.822366	-0.00608718	-19.9798	5900000	5950000
CAMWBO010000011.1	119	0.139231	0.106173	2.9884	1.99778	0.0330576	108.504	5950000	6000000
CAMWBO010000011.1	120	0.111799	0.110803	2.1502	1.43744	0.000996184	3.26976	6000000	6050000
CAMWBO010000011.1	121	0.155409	0.120302	1.34586	0.899727	0.0351072	115.232	6050000	6100000
CAMWBO010000011.1	122	0.151222	0.0742235	2.46816	1.65	0.0769982	252.73	6100000	6150000
CAMWBO010000011.1	123	0.668287	0.697107	1.98752	1.32868	-0.0288204	-94.5967	6150000	6200000
CAMWBO010000011.1	124	1.41225	1.53346	0.932787	0.623581	-0.121202	-397.821	6200000	6250000
CAMWBO010000011.1	125	1.03157	1.0766	0.971333	0.649349	-0.045023	-147.778	6250000	6300000
CAMWBO010000011.1	126	0.767353	0.891984	0.890791	0.595506	-0.12463	-409.072	6300000	6350000
CAMWBO010000011.1	127	0.557114	0.657038	0.838105	0.560284	-0.0999236	-327.978	6350000	6400000
CAMWBO010000011.1	128	0.439107	0.765678	0.573658	0.383498	-0.326571	-1071.9	6400000	6450000
CAMWBO010000011.1	129	0.439785	0.852873	0.50998	0.340929	-0.413087	-1355.87	6450000	6500000
CAMWBO010000011.1	130	0.584196	0.930953	0.61067	0.408241	-0.346757	-1138.16	6500000	6550000
CAMWBO010000011.1	131	0.377017	0.603173	0.623723	0.416967	-0.226157	-742.311	6550000	6600000
CAMWBO010000011.1	132	0.481587	0.694964	0.689555	0.460977	-0.213377	-700.364	6600000	6650000
CAMWBO010000011.1	133	1.23317	1.0875	1.14367	0.764558	0.145671	478.134	6650000	6700000
CAMWBO010000011.1	134	1.40713	1.42098	0.99491	0.665111	-0.0138456	-45.4453	6700000	6750000
CAMWBO010000011.1	135	1.57764	1.44953	1.15687	0.773386	0.128111	420.495	6750000	6800000
CAMWBO010000011.1	136	1.19985	1.28683	0.903499	0.604001	-0.0869819	-285.499	6800000	6850000
CAMWBO010000011.1	137	1.06556	1.30032	0.8652	0.578398	-0.234756	-770.535	6850000	6900000
CAMWBO010000011.1	138	0.456288	0.727049	1.07742	0.72027	-0.270761	-888.716	6900000	6950000
CAMWBO010000011.1	139	1.16765	0.851858	1.4514	0.970278	0.315793	1036.52	6950000	7000000
CAMWBO010000011.1	140	1.01349	0.582862	2.1861	1.46144	0.43063	1413.45	7000000	7050000
CAMWBO010000011.1	141	0.935255	0.387816	4.27716	2.85934	0.547439	1796.85	7050000	7100000
CAMWBO010000011.1	142	1.16857	1.11589	1.08277	0.723844	0.0526853	172.928	7100000	7150000
CAMWBO010000011.1	143	0.692686	0.678872	1.37101	0.91654	0.0138144	45.3428	7150000	7200000
CAMWBO010000011.1	144	0.763513	0.291581	7.57947	5.06698	0.471932	1549.01	7200000	7250000
CAMWBO010000011.1	145	0.917894	0.847538	1.14617	0.766231	0.0703561	230.929	7250000	7300000
CAMWBO010000011.1	146	1.10657	0.828492	1.6447	1.09951	0.278075	912.72	7300000	7350000
CAMWBO010000011.1	147	1.2769	0.652457	2.659	1.77758	0.62444	2049.59	7350000	7400000
CAMWBO010000011.1	148	0.989215	1.02401	0.96683	0.646339	-0.0347987	-114.219	7400000	7450000
CAMWBO010000011.1	149	1.26892	1.03491	1.25057	0.836024	0.234006	768.073	7450000	7500000
CAMWBO010000011.1	150	0.870044	0.63705	1.93425	1.29308	0.232994	764.751	7500000	7550000
CAMWBO010000011.1	151	1.31744	0.955548	1.58414	1.05902	0.361892	1187.83	7550000	7600000
CAMWBO010000011.1	152	1.07763	0.589955	2.31876	1.55012	0.487674	1600.69	7600000	7650000
CAMWBO010000011.1	153	0.64663	0.429107	1.76751	1.18161	0.217523	713.973	7650000	7700000
CAMWBO010000011.1	154	0.675603	0.588878	1.3308	0.889655	0.0867258	284.659	7700000	7750000
CAMWBO010000011.1	155	1.05675	0.942825	1.18864	0.794619	0.113923	373.929	7750000	7800000
CAMWBO010000011.1	156	1.20717	1.1597	1.04586	0.699171	0.047463	155.787	7800000	7850000
CAMWBO010000011.1	157	0.970326	1.11583	0.85835	0.573818	-0.145508	-477.6	7850000	7900000
CAMWBO010000011.1	158	1.12416	1.64531	0.691267	0.462121	-0.521154	-1710.57	7900000	7950000
CAMWBO010000011.1	159	0.578018	0.593715	0.999089	0.667905	-0.0156964	-51.52	7950000	8000000
CAMWBO010000011.1	160	0.580559	0.558217	1.08505	0.72537	0.0223422	73.3336	8000000	8050000
CAMWBO010000011.1	161	1.04572	1.20962	0.903177	0.603786	-0.163898	-537.961	8050000	8100000
CAMWBO010000011.1	162	1.33276	1.38617	0.906066	0.605718	-0.0534109	-175.31	8100000	8150000
CAMWBO010000011.1	163	0.753012	0.621046	1.30604	0.873107	0.131966	433.151	8150000	8200000
CAMWBO010000011.1	164	0.444314	0.38465	1.64652	1.10072	0.0596645	195.836	8200000	8250000
CAMWBO010000011.1	165	0.712755	0.734218	1.15887	0.774719	-0.0214635	-70.4495	8250000	8300000
CAMWBO010000011.1	166	1.02305	1.0351	1.01129	0.676061	-0.0120562	-39.572	8300000	8350000
CAMWBO010000011.1	167	0.934439	1.12422	0.838322	0.56043	-0.189781	-622.916	8350000	8400000
CAMWBO010000011.1	168	1.12674	1.37328	0.849478	0.567887	-0.246533	-809.19	8400000	8450000
CAMWBO010000011.1	169	1.17776	1.28186	0.938412	0.627341	-0.104106	-341.706	8450000	8500000
CAMWBO010000011.1	170	1.30521	1.33005	1.02002	0.681898	-0.0248455	-81.5499	8500000	8550000
CAMWBO010000011.1	171	1.14228	1.13366	1.01709	0.679941	0.00862392	28.3062	8550000	8600000
CAMWBO010000011.1	172	1.29688	1.29739	0.973083	0.650519	-0.000505536	-1.65931	8600000	8650000
CAMWBO010000011.1	173	1.83795	1.73555	1.1162	0.746195	0.102397	336.097	8650000	8700000
CAMWBO010000011.1	174	2.14623	2.05742	1.0375	0.693583	0.0888062	291.487	8700000	8715000
CAMWBO010000012.1	0	0.783242	1.10525	0.724149	0.484104	-0.322008	-1056.92	0	50000
CAMWBO010000012.1	1	0.741113	0.769937	1.13102	0.756104	-0.0288248	-94.6112	50000	100000
CAMWBO010000012.1	2	1.03303	0.905604	1.32541	0.886054	0.127428	418.256	100000	150000
CAMWBO010000012.1	3	0.874635	0.83615	1.13222	0.756902	0.0384851	126.319	150000	200000
CAMWBO010000012.1	4	1.5899	1.70097	0.952642	0.636854	-0.111068	-364.556	200000	250000
CAMWBO010000012.1	5	1.28013	1.32169	0.988269	0.660671	-0.0415549	-136.395	250000	300000
CAMWBO010000012.1	6	1.21808	1.24331	1.02196	0.683191	-0.0252381	-82.8387	300000	350000
CAMWBO010000012.1	7	1.16818	1.41007	0.798984	0.534132	-0.241883	-793.929	350000	400000
CAMWBO010000012.1	8	0.760837	0.981899	0.581467	0.388719	-0.221061	-725.586	400000	450000
CAMWBO010000012.1	9	0.811613	1.06403	0.743652	0.497141	-0.252422	-828.519	450000	500000
CAMWBO010000012.1	10	1.11329	0.886842	1.29593	0.866346	0.226446	743.259	500000	550000
CAMWBO010000012.1	11	1.55192	1.4163	1.12413	0.751497	0.13562	445.143	550000	600000
CAMWBO010000012.1	12	0.829762	0.760346	0.990939	0.662456	0.0694156	227.842	600000	650000
CAMWBO010000012.1	13	1.21609	1.34816	0.893283	0.597172	-0.132067	-433.482	650000	700000
CAMWBO010000012.1	14	0.44273	0.390439	4.69701	3.14001	0.0522908	171.633	700000	750000
CAMWBO010000012.1	15	1.02034	1.04495	1.0237	0.684359	-0.0246169	-80.7997	750000	800000
CAMWBO010000012.1	16	1.41099	1.50631	0.952688	0.636885	-0.0953145	-312.849	800000	850000
CAMWBO010000012.1	17	1.38128	1.1698	1.25286	0.837552	0.211479	694.135	850000	900000
CAMWBO010000012.1	18	1.3045	1.37605	0.933953	0.62436	-0.0715478	-234.84	900000	950000
CAMWBO010000012.1	19	1.27744	1.2337	1.07479	0.718509	0.0437369	143.557	950000	1000000
CAMWBO010000012.1	20	1.16776	1.21188	0.988652	0.660927	-0.0441193	-144.812	1000000	1050000
CAMWBO010000012.1	21	0.695261	0.834436	0.797234	0.532961	-0.139175	-456.811	1050000	1100000
CAMWBO010000012.1	22	1.25748	1.20452	2.8315	1.89289	0.0529523	173.805	1100000	1150000
CAMWBO010000012.1	23	1.2081	1.08648	1.1479	0.767386	0.121626	399.21	1150000	1200000
CAMWBO010000012.1	24	1.03882	1.02702	1.01335	0.677437	0.0117992	38.7285	1200000	1250000
CAMWBO010000012.1	25	0.868474	0.947189	0.941537	0.62943	-0.0787152	-258.366	1250000	1300000
CAMWBO010000012.1	26	0.547368	0.550313	1.19499	0.798867	-0.00294543	-9.66775	1300000	1350000
CAMWBO010000012.1	27	1.04839	1.18433	0.887123	0.593054	-0.135933	-446.171	1350000	1400000
CAMWBO010000012.1	28	1.32024	1.20014	1.0997	0.735163	0.120105	394.22	1400000	1450000
CAMWBO010000012.1	29	0.746266	0.592466	1.42239	0.950888	0.1538	504.816	1450000	1500000
CAMWBO010000012.1	30	0.97017	1.12927	1.27743	0.853981	-0.159104	-522.225	1500000	1550000
CAMWBO010000012.1	31	1.37209	1.48018	0.948591	0.634146	-0.108096	-354.802	1550000	1600000
CAMWBO010000012.1	32	1.33727	1.40816	0.943962	0.631051	-0.0708891	-232.678	1600000	1650000
CAMWBO010000012.1	33	1.26584	1.16226	1.09326	0.73086	0.103578	339.971	1650000	1700000
CAMWBO010000012.1	34	1.83928	1.63221	1.13268	0.757213	0.207062	679.636	1700000	1750000
CAMWBO010000012.1	35	1.71787	1.55627	1.11517	0.745509	0.161606	530.438	1750000	1800000
CAMWBO010000012.1	36	1.15605	1.14204	1.01641	0.679483	0.0140158	46.0039	1800000	1850000
CAMWBO010000012.1	37	1.19143	1.26312	0.954086	0.637819	-0.0716887	-235.303	1850000	1900000
CAMWBO010000012.1	38	1.31722	1.34957	0.988329	0.660711	-0.0323445	-106.164	1900000	1950000
CAMWBO010000012.1	39	0.888372	0.817097	1.22593	0.819551	0.0712756	233.947	1950000	2000000
CAMWBO010000012.1	40	0.819169	0.829231	1.14901	0.768129	-0.0100613	-33.0241	2000000	2050000
CAMWBO010000012.1	41	0.807117	1.16441	0.670035	0.447928	-0.357296	-1172.75	2050000	2100000
CAMWBO010000012.1	42	1.17933	1.31013	0.910425	0.608632	-0.1308	-429.322	2100000	2150000
CAMWBO010000012.1	43	1.72058	1.65945	1.0344	0.691514	0.0611382	200.673	2150000	2200000
CAMWBO010000012.1	44	1.33757	1.2099	1.16433	0.778368	0.127669	419.047	2200000	2250000
CAMWBO010000012.1	45	1.50226	1.18835	1.33761	0.894213	0.313907	1030.33	2250000	2300000
CAMWBO010000012.1	46	1.09297	1.01377	1.10986	0.741958	0.0792039	259.97	2300000	2350000
CAMWBO010000012.1	47	1.24201	1.07944	1.1829	0.790787	0.162569	533.599	2350000	2400000
CAMWBO010000012.1	48	0.768199	0.780098	1.25762	0.840734	-0.0118994	-39.0573	2400000	2450000
CAMWBO010000012.1	49	1.27535	1.42907	0.898893	0.600922	-0.153718	-504.545	2450000	2500000
CAMWBO010000012.1	50	0.422502	0.419052	2.12021	1.41739	0.00345012	11.3243	2500000	2550000
CAMWBO010000012.1	51	0.93309	0.815667	1.13998	0.762091	0.117423	385.415	2550000	2600000
CAMWBO010000012.1	52	1.56476	1.40277	1.19566	0.799312	0.161982	531.672	2600000	2650000
CAMWBO010000012.1	53	1.37497	1.5227	0.967249	0.646619	-0.147728	-484.886	2650000	2700000
CAMWBO010000012.1	54	0.853045	0.90022	0.970581	0.648846	-0.0471748	-154.841	2700000	2750000
CAMWBO010000012.1	55	1.0597	0.948313	1.13574	0.759256	0.111385	365.597	2750000	2800000
CAMWBO010000012.1	56	0.976523	0.881464	1.12679	0.753271	0.0950582	312.008	2800000	2850000
CAMWBO010000012.1	57	0.78984	0.834779	1.03588	0.692502	-0.0449394	-147.504	2850000	2900000
CAMWBO010000012.1	58	0.8857	1.02454	0.870885	0.582198	-0.138839	-455.71	2900000	2950000
CAMWBO010000012.1	59	0.934186	0.791382	1.34751	0.900826	0.142804	468.722	2950000	3000000
CAMWBO010000012.1	60	0.708271	0.481435	2.6258	1.75538	0.226836	744.54	3000000	3050000
CAMWBO010000012.1	61	0.946934	0.758034	1.40568	0.939715	0.1889	620.023	3050000	3100000
CAMWBO010000012.1	62	1.03624	1.24864	0.8165	0.545841	-0.212406	-697.178	3100000	3150000
CAMWBO010000012.1	63	1.09428	1.0472	1.24585	0.83287	0.0470781	154.524	3150000	3200000
CAMWBO010000012.1	64	1.14139	1.14452	1.01739	0.680137	-0.00313329	-10.2843	3200000	3250000
CAMWBO010000012.1	65	0.758105	0.765776	0.967139	0.646545	-0.00767023	-25.1759	3250000	3300000
CAMWBO010000012.1	66	0.495265	0.49898	0.998911	0.667786	-0.00371521	-12.1944	3300000	3350000
CAMWBO010000012.1	67	0.901316	0.839937	1.1412	0.762908	0.0613781	201.46	3350000	3400000
CAMWBO010000012.1	68	0.921438	0.951077	0.95819	0.640563	-0.0296392	-97.2843	3400000	3450000
CAMWBO010000012.1	69	0.870695	0.729225	1.18201	0.790188	0.14147	464.346	3450000	3500000
CAMWBO010000012.1	70	0.444827	0.309283	1.72331	1.15206	0.135544	444.894	3500000	3550000
CAMWBO010000012.1	71	1.44446	1.23058	1.23223	0.823763	0.21388	702.015	3550000	3600000
CAMWBO010000012.1	72	1.49635	1.20582	1.24947	0.835286	0.290528	953.595	3600000	3650000
CAMWBO010000012.1	73	1.62702	1.44422	1.12249	0.750403	0.182803	600.011	3650000	3700000
CAMWBO010000012.1	74	1.68264	1.48828	1.12284	0.750635	0.194361	637.947	3700000	3750000
CAMWBO010000012.1	75	2.16798	2.13429	1.02063	0.682303	0.0336876	110.572	3750000	3800000
CAMWBO010000012.1	76	1.82786	1.98743	0.921771	0.616216	-0.159571	-523.756	3800000	3850000
CAMWBO010000012.1	77	1.93926	2.08888	0.930198	0.62185	-0.149621	-491.099	3850000	3900000
CAMWBO010000012.1	78	2.36895	2.42335	0.977625	0.653556	-0.0544022	-178.563	3900000	3950000
CAMWBO010000012.1	79	1.80323	1.73365	1.03995	0.695222	0.0695775	228.373	3950000	4000000
CAMWBO010000012.1	80	1.91987	1.75369	1.09607	0.732738	0.166175	545.432	4000000	4050000
CAMWBO010000012.1	81	1.91828	1.79803	1.06944	0.714932	0.120245	394.678	4050000	4100000
CAMWBO010000012.1	82	1.39785	1.33228	0.999752	0.668348	0.0655644	215.201	4100000	4150000
CAMWBO010000012.1	83	2.05159	2.01074	1.02423	0.684714	0.0408524	134.089	4150000	4200000
CAMWBO010000012.1	84	0.895808	0.785772	1.46529	0.979568	0.110036	361.168	4200000	4250000
CAMWBO010000012.1	85	0.367715	0.364402	1.06449	0.711624	0.00331257	10.8728	4250000	4295000
CAMWBO010000013.1	0	0.280117	0.14057	2.59746	1.73643	0.139547	458.031	0	50000
CAMWBO010000013.1	1	0.351752	0.320257	1.11986	0.748645	0.0314954	103.377	50000	100000
CAMWBO010000013.1	2	0.989069	0.719018	2.41963	1.61756	0.270051	886.384	100000	150000
CAMWBO010000013.1	3	0.568225	0.513353	1.08419	0.724797	0.0548724	180.107	150000	200000
CAMWBO010000013.1	4	0.385632	0.533864	0.839014	0.560892	-0.148232	-486.54	200000	250000
CAMWBO010000013.1	5	0.232039	0.211592	1.26553	0.846023	0.0204476	67.1147	250000	300000
CAMWBO010000013.1	6	0.437781	0.817713	0.849452	0.56787	-0.379932	-1247.04	300000	350000
CAMWBO010000013.1	7	0.581443	1.09667	0.515453	0.344587	-0.515228	-1691.12	350000	400000
CAMWBO010000013.1	8	0.220982	0.369824	0.610597	0.408193	-0.148842	-488.542	400000	450000
CAMWBO010000013.1	9	0.32301	0.259519	1.00868	0.674315	0.0634906	208.394	450000	500000
CAMWBO010000013.1	10	0.943908	0.54205	1.88796	1.26213	0.401858	1319.01	500000	550000
CAMWBO010000013.1	11	0.860683	0.399214	2.45522	1.64135	0.461468	1514.67	550000	600000
CAMWBO010000013.1	12	1.01315	0.963194	1.09121	0.729486	0.049959	163.98	600000	650000
CAMWBO010000013.1	13	0.522217	0.793472	0.589137	0.393846	-0.271255	-890.335	650000	700000
CAMWBO010000013.1	14	0.271455	0.670226	0.349531	0.233666	-0.398771	-1308.88	700000	750000
CAMWBO010000013.1	15	0.780927	1.05144	0.740156	0.494805	-0.270513	-887.901	750000	800000
CAMWBO010000013.1	16	1.09118	1.18352	0.889562	0.594685	-0.0923409	-303.089	800000	850000
CAMWBO010000013.1	17	0.801088	0.7571	1.21219	0.810362	0.0439879	144.381	850000	900000
CAMWBO010000013.1	18	0.867146	0.422964	2.0259	1.35434	0.444183	1457.93	900000	950000
CAMWBO010000013.1	19	0.44394	0.218217	2.88453	1.92835	0.225723	740.886	950000	1000000
CAMWBO010000013.1	20	0.416752	0.320559	1.82256	1.21841	0.0961924	315.731	1000000	1050000
CAMWBO010000013.1	21	0.511452	0.218894	2.515	1.68131	0.292559	960.26	1050000	1100000
CAMWBO010000013.1	22	0.623692	0.44365	1.53461	1.02591	0.180042	590.95	1100000	1150000
CAMWBO010000013.1	23	0.599316	0.249633	6.23017	4.16495	0.349683	1147.76	1150000	1200000
CAMWBO010000013.1	24	0.399086	0.383635	6.81593	4.55654	0.015451	50.7147	1200000	1250000
CAMWBO010000013.1	25	0.289697	0.511555	0.620541	0.41484	-0.221858	-728.202	1250000	1300000
CAMWBO010000013.1	26	1.06966	0.999836	1.11438	0.744978	0.0698223	229.177	1300000	1350000
CAMWBO010000013.1	27	0.557131	0.687222	0.637791	0.426372	-0.130091	-426.996	1350000	1400000
CAMWBO010000013.1	28	0.707021	0.814918	0.871165	0.582385	-0.107898	-354.151	1400000	1450000
CAMWBO010000013.1	29	0.56887	0.724197	0.787764	0.526631	-0.155327	-509.828	1450000	1500000
CAMWBO010000013.1	30	0.490195	0.593856	0.886187	0.592428	-0.103661	-340.244	1500000	1550000
CAMWBO010000013.1	31	0.286338	0.824826	0.272324	0.182052	-0.538487	-1767.47	1550000	1600000
CAMWBO010000013.1	32	0.621426	0.783783	0.79378	0.530653	-0.162357	-532.901	1600000	1650000
CAMWBO010000013.1	33	1.25545	1.14468	1.16751	0.780498	0.110766	363.567	1650000	1700000
CAMWBO010000013.1	34	0.658399	0.680038	0.835252	0.558377	-0.0216391	-71.0255	1700000	1750000
CAMWBO010000013.1	35	0.267102	0.283948	1.05436	0.704852	-0.0168454	-55.2914	1750000	1800000
CAMWBO010000013.1	36	1.40639	1.48538	0.983758	0.657656	-0.0789889	-259.264	1800000	1850000
CAMWBO010000013.1	37	0.737165	0.63073	1.16672	0.779966	0.106435	349.35	1850000	1900000
CAMWBO010000013.1	38	0.460284	0.424803	0.955592	0.638826	0.0354802	116.456	1900000	1950000
CAMWBO010000013.1	39	0.47321	0.624018	0.747446	0.499678	-0.150808	-494.993	1950000	2000000
CAMWBO010000013.1	40	0.405763	0.457521	0.850436	0.568528	-0.0517582	-169.885	2000000	2050000
CAMWBO010000013.1	41	0.322617	0.251844	1.47208	0.984106	0.0707733	232.298	2050000	2100000
CAMWBO010000013.1	42	0.491611	0.389947	1.39841	0.934853	0.101664	333.691	2100000	2150000
CAMWBO010000013.1	43	0.681704	0.547332	1.4591	0.975428	0.134372	441.046	2150000	2200000
CAMWBO010000013.1	44	0.349662	0.446249	0.900689	0.602123	-0.0965874	-317.027	2200000	2250000
CAMWBO010000013.1	45	0.42217	0.331347	1.24198	0.83028	0.0908234	298.108	2250000	2300000
CAMWBO010000013.1	46	0.753293	0.423499	4.81606	3.2196	0.329794	1082.48	2300000	2350000
CAMWBO010000013.1	47	1.64025	1.52573	1.07454	0.718344	0.114524	375.9	2350000	2400000
CAMWBO010000013.1	48	1.38689	1.09448	1.26555	0.846037	0.292411	959.775	2400000	2450000
CAMWBO010000013.1	49	1.04404	1.11056	0.938533	0.627422	-0.0665164	-218.326	2450000	2500000
CAMWBO010000013.1	50	0.897791	0.992815	0.909477	0.607997	-0.0950241	-311.896	2500000	2550000
CAMWBO010000013.1	51	0.912937	0.648067	1.60643	1.07392	0.26487	869.379	2550000	2600000
CAMWBO010000013.1	52	1.08432	1.05661	1.11751	0.747071	0.0277171	90.9755	2600000	2650000
CAMWBO010000013.1	53	0.627786	0.74055	0.902312	0.603208	-0.112764	-370.125	2650000	2700000
CAMWBO010000013.1	54	0.396923	0.459218	1.01692	0.679822	-0.0622951	-204.47	2700000	2750000
CAMWBO010000013.1	55	0.568795	0.351365	2.4459	1.63512	0.21743	713.668	2750000	2800000
CAMWBO010000013.1	56	0.826418	0.493123	3.7707	2.52076	0.333296	1093.97	2800000	2850000
CAMWBO010000013.1	57	0.464857	0.185117	2.97954	1.99186	0.27974	918.185	2850000	2900000
CAMWBO010000013.1	58	0.437242	0.125932	6.87504	4.59606	0.31131	1021.81	2900000	2950000
CAMWBO010000013.1	59	0.969267	0.736949	1.70932	1.1427	0.232319	762.536	2950000	3000000
CAMWBO010000013.1	60	1.44507	1.48603	0.989111	0.661234	-0.0409587	-134.438	3000000	3050000
CAMWBO010000013.1	61	1.47341	1.4866	0.99678	0.666361	-0.0131877	-43.2859	3050000	3100000
CAMWBO010000013.1	62	1.52943	1.14646	1.48908	0.99547	0.382973	1257.03	3100000	3150000
CAMWBO010000013.1	63	1.80844	1.08139	1.75674	1.17441	0.727049	2386.38	3150000	3200000
CAMWBO010000013.1	64	1.78004	1.12131	1.62784	1.08824	0.658733	2162.15	3200000	3250000
CAMWBO010000013.1	65	1.61721	1.01594	1.63775	1.09486	0.601275	1973.56	3250000	3300000
CAMWBO010000013.1	66	1.69134	1.0553	1.80283	1.20522	0.636042	2087.67	3300000	3350000
CAMWBO010000013.1	67	1.59523	0.739485	2.30051	1.53792	0.85574	2808.78	3350000	3400000
CAMWBO010000013.1	68	1.66868	0.967784	1.96046	1.31059	0.700899	2300.55	3400000	3450000
CAMWBO010000013.1	69	1.66084	0.978363	1.73681	1.16108	0.682474	2240.07	3450000	3500000
CAMWBO010000013.1	70	1.6048	0.831069	2.28292	1.52617	0.773732	2539.61	3500000	3550000
CAMWBO010000013.1	71	1.80007	1.20685	1.55292	1.03815	0.593212	1947.09	3550000	3600000
CAMWBO010000013.1	72	1.75339	0.932938	2.30241	1.53919	0.820449	2692.95	3600000	3650000
CAMWBO010000013.1	73	1.40905	0.268175	5.74877	3.84313	1.14087	3744.68	3650000	3700000
CAMWBO010000013.1	74	1.61821	0.392031	4.62629	3.09274	1.22617	4024.65	3700000	3750000
CAMWBO010000013.1	75	1.49308	0.187257	8.20493	5.48511	1.30583	4286.09	3750000	3800000
CAMWBO010000013.1	76	1.6401	0.354628	4.9164	3.28668	1.28547	4219.29	3800000	3850000
CAMWBO010000013.1	77	1.52632	0.619412	2.55976	1.71124	0.90691	2976.74	3850000	3900000
CAMWBO010000013.1	78	1.74315	1.02056	1.80344	1.20562	0.72259	2371.75	3900000	3950000
CAMWBO010000013.1	79	1.97381	1.21458	1.69586	1.13371	0.759224	2491.99	3950000	4000000
CAMWBO010000013.1	80	1.70058	1.54141	1.27834	0.854588	0.159172	522.448	4000000	4050000
CAMWBO010000013.1	81	1.84017	1.2203	1.64381	1.09891	0.619867	2034.58	4050000	4100000
CAMWBO010000013.1	82	1.51212	0.646328	2.75623	1.84258	0.86579	2841.77	4100000	4150000
CAMWBO010000013.1	83	1.60077	0.79035	2.3702	1.58451	0.810418	2660.02	4150000	4200000
CAMWBO010000013.1	84	1.32807	0.526476	3.62074	2.42051	0.801589	2631.04	4200000	4250000
CAMWBO010000013.1	85	1.328	0.53877	2.76044	1.84539	0.789234	2590.49	4250000	4300000
CAMWBO010000013.1	86	1.90237	1.47287	1.33773	0.89429	0.429497	1409.73	4300000	4350000
CAMWBO010000013.1	87	1.33563	1.40626	0.952044	0.636454	-0.0706322	-231.835	4350000	4400000
CAMWBO010000013.1	88	1.31855	1.32502	1.00405	0.67122	-0.00646335	-21.2146	4400000	4450000
CAMWBO010000013.1	89	1.50583	1.54737	0.980558	0.655516	-0.0415482	-136.373	4450000	4500000
CAMWBO010000013.1	90	2.01602	2.00815	1.00561	0.672262	0.00787256	25.84	4500000	4550000
CAMWBO010000013.1	91	1.49893	1.50569	1.23251	0.823951	-0.00675713	-22.1788	4550000	4600000
CAMWBO010000013.1	92	1.29135	1.06455	1.36463	0.912271	0.226796	744.408	4600000	4650000
CAMWBO010000013.1	93	1.28909	1.22552	1.07129	0.716172	0.0635706	208.657	4650000	4700000
CAMWBO010000013.1	94	1.70259	1.5813	1.09014	0.728772	0.121298	398.135	4700000	4750000
CAMWBO010000013.1	95	1.56109	1.49561	1.05872	0.707766	0.0654746	214.906	4750000	4800000
CAMWBO010000013.1	96	1.50694	1.39124	1.09264	0.730442	0.115693	379.739	4800000	4850000
CAMWBO010000013.1	97	1.49765	1.3467	1.12315	0.750838	0.150952	495.468	4850000	4900000
CAMWBO010000013.1	98	1.51342	1.31292	1.1729	0.784102	0.20051	658.13	4900000	4950000
CAMWBO010000013.1	99	1.10506	1.00009	1.18119	0.789639	0.104972	344.548	4950000	5000000
CAMWBO010000013.1	100	1.20635	0.82458	2.66907	1.78431	0.381772	1253.08	5000000	5050000
CAMWBO010000013.1	101	1.37931	1.21505	1.14379	0.764642	0.164265	539.166	5050000	5100000
CAMWBO010000013.1	102	1.53647	1.44333	1.14821	0.767597	0.0931423	305.72	5100000	5150000
CAMWBO010000013.1	103	1.0521	0.947231	1.13707	0.760144	0.104867	344.203	5150000	5200000
CAMWBO010000013.1	104	0.955551	0.802605	1.2462	0.833102	0.152946	502.012	5200000	5250000
CAMWBO010000013.1	105	1.42036	1.2026	1.18922	0.795011	0.217763	714.759	5250000	5300000
CAMWBO010000013.1	106	1.39529	1.21789	1.15242	0.770408	0.177405	582.294	5300000	5350000
CAMWBO010000013.1	107	1.2688	1.11906	1.15244	0.77042	0.149739	491.486	5350000	5400000
CAMWBO010000013.1	108	1.60054	1.38008	1.16783	0.780711	0.220459	723.609	5400000	5450000
CAMWBO010000013.1	109	1.51014	1.34547	1.1248	0.751947	0.164672	540.5	5450000	5500000
CAMWBO010000013.1	110	2.13346	2.19404	0.9796	0.654876	-0.0605782	-198.835	5500000	5550000
CAMWBO010000013.1	111	2.06047	2.07793	0.996176	0.665957	-0.0174616	-57.3138	5550000	5600000
CAMWBO010000013.1	112	1.46789	0.395016	9.17094	6.13089	1.07288	3521.49	5600000	5650000
CAMWBO010000013.1	113	0.989696	0.154191	12.4543	8.32588	0.835505	2742.36	5650000	5700000
CAMWBO010000013.1	114	0.698268	0.18674	3.80943	2.54665	0.511528	1678.98	5700000	5750000
CAMWBO010000013.1	115	1.36393	1.51015	1.1469	0.766717	-0.146219	-479.934	5750000	5800000
CAMWBO010000013.1	116	1.43668	0.940222	1.6127	1.07811	0.496459	1629.52	5800000	5850000
CAMWBO010000013.1	117	1.03096	1.06983	0.996445	0.666137	-0.0388705	-127.584	5850000	5900000
CAMWBO010000013.1	118	1.3175	1.34698	0.944206	0.631215	-0.0294831	-96.7718	5900000	5950000
CAMWBO010000013.1	119	1.23552	1.41232	0.86992	0.581553	-0.176809	-580.337	5950000	6000000
CAMWBO010000013.1	120	1.07644	1.12632	0.962653	0.643546	-0.0498734	-163.699	6000000	6050000
CAMWBO010000013.1	121	1.30409	1.54637	0.848304	0.567103	-0.242272	-795.205	6050000	6100000
CAMWBO010000013.1	122	1.32207	1.36826	1.00213	0.669939	-0.0461867	-151.598	6100000	6150000
CAMWBO010000013.1	123	1.2466	1.24605	1.01685	0.679777	0.000551075	1.80879	6150000	6200000
CAMWBO010000013.1	124	1.29836	1.23514	1.08509	0.7254	0.0632175	207.498	6200000	6250000
CAMWBO010000013.1	125	1.39854	1.39841	1.00716	0.673303	0.000123764	0.406227	6250000	6300000
CAMWBO010000013.1	126	1.08497	1.32725	0.831789	0.556062	-0.242282	-795.239	6300000	6350000
CAMWBO010000013.1	127	0.62261	0.902693	0.792953	0.5301	-0.280083	-919.313	6350000	6400000
CAMWBO010000013.1	128	0.595326	0.705008	0.855476	0.571897	-0.109682	-360.007	6400000	6450000
CAMWBO010000013.1	129	0.887895	0.881754	1.03865	0.694353	0.00614106	20.1567	6450000	6500000
CAMWBO010000013.1	130	0.893063	0.809682	1.01013	0.675283	0.083381	273.68	6500000	6550000
CAMWBO010000013.1	131	0.684617	1.00315	0.635124	0.424589	-0.318534	-1045.52	6550000	6600000
CAMWBO010000013.1	132	1.04599	1.31929	0.799317	0.534354	-0.273296	-897.037	6600000	6650000
CAMWBO010000013.1	133	0.893036	0.866297	1.0621	0.710027	0.0267386	87.7637	6650000	6700000
CAMWBO010000013.1	134	1.19508	1.09889	1.1256	0.752482	0.0961885	315.718	6700000	6750000
CAMWBO010000013.1	135	1.12863	1.13516	1.01539	0.678799	-0.00653005	-21.4335	6750000	6800000
CAMWBO010000013.1	136	1.11636	1.20078	0.949964	0.635064	-0.0844126	-277.066	6800000	6850000
CAMWBO010000013.1	137	0.953633	1.20775	0.796115	0.532214	-0.254121	-834.098	6850000	6900000
CAMWBO010000013.1	138	1.2086	1.26159	1.03466	0.691682	-0.0529937	-173.941	6900000	6950000
CAMWBO010000013.1	139	1.13152	1.08117	1.61761	1.0814	0.0503508	165.266	6950000	7000000
CAMWBO010000013.1	140	0.776737	0.68153	1.24981	0.835515	0.0952068	312.496	7000000	7050000
CAMWBO010000013.1	141	0.540448	0.690615	0.66497	0.444541	-0.150167	-492.89	7050000	7100000
CAMWBO010000013.1	142	0.563909	0.588054	0.971684	0.649584	-0.0241446	-79.2493	7100000	7150000
CAMWBO010000013.1	143	0.266425	0.442207	0.500688	0.334717	-0.175783	-576.969	7150000	7200000
CAMWBO010000013.1	144	0.325936	0.379266	0.823863	0.550764	-0.0533306	-175.046	7200000	7250000
CAMWBO010000013.1	145	0.6468	0.627416	1.02319	0.684014	0.0193837	63.6228	7250000	7300000
CAMWBO010000013.1	146	0.994353	0.926	1.10199	0.736697	0.0683525	224.352	7300000	7350000
CAMWBO010000013.1	147	1.3257	1.10654	1.44007	0.962709	0.219151	719.316	7350000	7400000
CAMWBO010000013.1	148	0.50571	0.633391	0.809601	0.541229	-0.127681	-419.084	7400000	7450000
CAMWBO010000013.1	149	0.889491	0.724701	1.25446	0.838626	0.16479	540.888	7450000	7500000
CAMWBO010000013.1	150	0.671643	0.572818	1.21406	0.811613	0.0988259	324.375	7500000	7550000
CAMWBO010000013.1	151	0.644275	0.635218	0.86522	0.578411	0.00905757	29.7295	7550000	7600000
CAMWBO010000013.1	152	0.038977	0.0948224	0.282166	0.188631	-0.0558453	-183.3	7600000	7650000
CAMWBO010000013.1	153	0.505495	0.919491	0.612022	0.409145	-0.413995	-1358.85	7650000	7700000
CAMWBO010000013.1	154	1.33791	0.955973	1.5439	1.03212	0.381937	1253.63	7700000	7750000
CAMWBO010000013.1	155	1.50199	1.21112	1.2934	0.864657	0.290868	954.713	7750000	7800000
CAMWBO010000013.1	156	1.45227	1.3736	1.06843	0.714259	0.0786653	258.202	7800000	7850000
CAMWBO010000013.1	157	0.917509	0.953815	0.925738	0.618869	-0.0363062	-119.167	7850000	7900000
CAMWBO010000013.1	158	0.986502	0.942977	1.07956	0.721702	0.0435249	142.861	7900000	7950000
CAMWBO010000013.1	159	0.76771	0.869414	0.894938	0.598278	-0.101704	-333.823	7950000	8000000
CAMWBO010000013.1	160	0.638522	0.69023	0.911652	0.609452	-0.0517088	-169.723	8000000	8050000
CAMWBO010000013.1	161	0.899822	0.856657	1.21706	0.813623	0.0431641	141.677	8050000	8100000
CAMWBO010000013.1	162	0.505855	0.416808	1.16259	0.777206	0.0890468	292.277	8100000	8150000
CAMWBO010000013.1	163	0.673402	0.75057	0.955509	0.63877	-0.0771674	-253.285	8150000	8200000
CAMWBO010000013.1	164	1.06514	0.983489	1.09004	0.728706	0.0816549	268.015	8200000	8250000
CAMWBO010000013.1	165	0.733539	0.639687	1.10828	0.740902	0.0938514	308.047	8250000	8300000
CAMWBO010000013.1	166	0.591646	0.403922	1.52969	1.02262	0.187724	616.164	8300000	8350000
CAMWBO010000013.1	167	0.865485	0.796966	1.20955	0.808603	0.0685196	224.901	8350000	8400000
CAMWBO010000013.1	168	1.10302	1.20233	0.934636	0.624817	-0.0993176	-325.989	8400000	8450000
CAMWBO010000013.1	169	1.15201	1.33842	0.879432	0.587912	-0.186408	-611.843	8450000	8500000
CAMWBO010000013.1	170	1.21147	1.10685	1.06029	0.70882	0.104627	343.416	8500000	8550000
CAMWBO010000013.1	171	0.998713	1.04422	0.920364	0.615276	-0.0455063	-149.365	8550000	8600000
CAMWBO010000013.1	172	0.626603	0.592986	1.04835	0.700833	0.0336165	110.339	8600000	8650000
CAMWBO010000013.1	173	0.723595	0.747674	1.00314	0.670612	-0.0240794	-79.0355	8650000	8700000
CAMWBO010000013.1	174	0.180417	0.156487	1.44428	0.96552	0.0239291	78.542	8700000	8750000
CAMWBO010000013.1	175	0.803069	0.762928	1.08963	0.72843	0.0401413	131.755	8750000	8800000
CAMWBO010000013.1	176	0.769891	0.789985	1.03431	0.691448	-0.0200936	-65.9528	8800000	8850000
CAMWBO010000013.1	177	0.780173	0.720135	1.12795	0.754047	0.0600389	197.065	8850000	8900000
CAMWBO010000013.1	178	1.34189	1.16917	1.15119	0.769588	0.172718	566.91	8900000	8950000
CAMWBO010000013.1	179	0.978766	0.87998	1.15114	0.769553	0.098786	324.244	8950000	9000000
CAMWBO010000013.1	180	1.19355	0.932136	1.27477	0.852201	0.261416	858.04	9000000	9050000
CAMWBO010000013.1	181	0.947255	1.00026	0.920432	0.615322	-0.0530058	-173.98	9050000	9100000
CAMWBO010000013.1	182	0.420253	0.670711	0.533372	0.356566	-0.250458	-822.074	9100000	9150000
CAMWBO010000013.1	183	0.866101	0.992052	0.864038	0.577621	-0.125951	-413.408	9150000	9200000
CAMWBO010000013.1	184	1.12759	1.24534	0.912704	0.610155	-0.117754	-386.504	9200000	9250000
CAMWBO010000013.1	185	0.824784	0.577509	2.06853	1.38284	0.247276	811.63	9250000	9300000
CAMWBO010000013.1	186	1.02304	1.24333	8.98964	6.0097	-0.220286	-723.04	9300000	9350000
CAMWBO010000013.1	187	0.505895	0.475038	1.08834	0.727571	0.0308574	101.283	9350000	9400000
CAMWBO010000013.1	188	0.945685	0.867449	1.14068	0.762562	0.0782359	256.793	9400000	9450000
CAMWBO010000013.1	189	1.4372	1.48791	0.979861	0.65505	-0.050715	-166.461	9450000	9500000
CAMWBO010000013.1	190	1.51005	1.64726	0.922111	0.616444	-0.13721	-450.361	9500000	9550000
CAMWBO010000013.1	191	1.36326	1.31225	1.05921	0.708098	0.0510103	167.43	9550000	9600000
CAMWBO010000013.1	192	1.52622	1.57492	0.965801	0.645651	-0.0487044	-159.862	9600000	9650000
CAMWBO010000014.1	0	1.65336	1.78325	0.928226	0.620532	-0.129893	-426.347	0	50000
CAMWBO010000014.1	1	1.34755	1.31685	1.03217	0.690021	0.0306918	100.739	50000	100000
CAMWBO010000014.1	2	1.29118	1.32892	0.878911	0.587564	-0.0377424	-123.881	100000	150000
CAMWBO010000014.1	3	1.54308	1.54356	0.999141	0.667939	-0.000483753	-1.58781	150000	200000
CAMWBO010000014.1	4	0.97027	0.893662	1.22826	0.821109	0.0766085	251.451	200000	250000
CAMWBO010000014.1	5	1.07994	1.09977	0.984238	0.657976	-0.0198252	-65.0718	250000	300000
CAMWBO010000014.1	6	1.41221	1.31609	1.13674	0.759927	0.0961124	315.468	300000	350000
CAMWBO010000014.1	7	1.41954	1.51426	0.949017	0.634431	-0.094716	-310.885	350000	400000
CAMWBO010000014.1	8	1.26855	1.2249	1.09038	0.728933	0.0436435	143.25	400000	450000
CAMWBO010000014.1	9	1.36916	1.48341	0.91571	0.612164	-0.114252	-375.006	450000	500000
CAMWBO010000014.1	10	1.21664	1.19888	1.15811	0.774214	0.0177533	58.2714	500000	550000
CAMWBO010000014.1	11	1.38613	1.40896	0.977197	0.65327	-0.0228311	-74.9383	550000	600000
CAMWBO010000014.1	12	1.00682	0.85403	2.73705	1.82975	0.15279	501.5	600000	650000
CAMWBO010000014.1	13	1.26978	1.28204	1.01413	0.677963	-0.0122633	-40.2516	650000	700000
CAMWBO010000014.1	14	1.64284	1.76292	0.93486	0.624967	-0.120078	-394.13	700000	750000
CAMWBO010000014.1	15	1.90175	1.94664	0.988388	0.660751	-0.0448834	-147.32	750000	800000
CAMWBO010000014.1	16	1.55336	1.43331	1.1999	0.802152	0.120051	394.04	800000	850000
CAMWBO010000014.1	17	1.38847	1.51224	1.00068	0.668966	-0.123768	-406.241	850000	900000
CAMWBO010000014.1	18	1.66694	1.5931	1.04516	0.698705	0.0738388	242.36	900000	950000
CAMWBO010000014.1	19	1.42692	1.45345	1.00133	0.669405	-0.0265283	-87.0734	950000	1000000
CAMWBO010000014.1	20	1.61981	1.68768	0.969157	0.647895	-0.067865	-222.752	1000000	1050000
CAMWBO010000014.1	21	1.42012	1.28478	1.08138	0.722915	0.13534	444.225	1050000	1100000
CAMWBO010000014.1	22	0.876958	0.886553	0.967109	0.646525	-0.00959464	-31.4923	1100000	1150000
CAMWBO010000014.1	23	1.31185	1.2016	1.1421	0.763508	0.110245	361.856	1150000	1200000
CAMWBO010000014.1	24	1.51158	1.37586	1.11226	0.743559	0.135724	445.485	1200000	1250000
CAMWBO010000014.1	25	1.31382	1.2748	1.05761	0.707024	0.0390134	128.053	1250000	1300000
CAMWBO010000014.1	26	1.33361	1.35566	0.996345	0.66607	-0.0220458	-72.3604	1300000	1350000
CAMWBO010000014.1	27	0.478189	0.632929	0.606328	0.405338	-0.15474	-507.901	1350000	1400000
CAMWBO010000014.1	28	0.872221	0.960875	0.910582	0.608736	-0.0886542	-290.988	1400000	1450000
CAMWBO010000014.1	29	0.995593	0.890933	1.25985	0.842227	0.10466	343.523	1450000	1500000
CAMWBO010000014.1	30	1.25231	1.43407	0.904884	0.604927	-0.181764	-596.6	1500000	1550000
CAMWBO010000014.1	31	0.708771	1.01604	0.511405	0.341881	-0.307266	-1008.54	1550000	1600000
CAMWBO010000014.1	32	0.714755	0.840958	0.696076	0.465336	-0.126203	-414.234	1600000	1650000
CAMWBO010000014.1	33	0.136893	0.387991	0.732131	0.489439	-0.251099	-824.178	1650000	1700000
[truncated: 359 more rows]

## Sheet: Hapan.difCoverage.mismatch.0
chr	range	heterogametic	homogametic	ratio	ratio_scaled	diff	diff_scaled	start	end
CAVLYH010000005.1	0	0.133402	0.167117	0.588946	0.422552	-0.0337153	-93.0869	0	50000
CAVLYH010000005.1	1	0.220878	0.484553	0.528171	0.378948	-0.263675	-727.998	50000	100000
CAVLYH010000005.1	2	0.0675364	0.216122	0.271083	0.194495	-0.148586	-410.24	100000	140000
CAVLYH010000010.1	0	0.870961	0.578511	2.93967	2.10913	0.29245	807.446	0	50000
CAVLYH010000010.1	1	0	0	0	0	0	0	50000	55000
CAVLYH010000011.1	0	0.368781	0.357034	9.1198	6.5432	0.0117476	32.4347	0	50000
CAVLYH010000011.1	1	0.258746	0.413444	0.60515	0.434178	-0.154698	-427.118	50000	90000
OY776060.1	0	0.481452	0.45667	0.949642	0.681342	0.0247826	68.424	0	50000
OY776060.1	1	0.104087	0.0985029	0.930554	0.667647	0.00558395	15.4171	50000	100000
OY776060.1	2	0.292076	0.341439	0.806136	0.57838	-0.0493626	-136.289	100000	150000
OY776060.1	3	0.408468	0.519144	0.875222	0.627947	-0.110676	-305.573	150000	200000
OY776060.1	4	0.458961	0.451935	0.998849	0.716646	0.00702604	19.3987	200000	250000
OY776060.1	5	0.486077	0.408755	1.06039	0.7608	0.0773226	213.485	250000	300000
OY776060.1	6	0.691225	0.71793	1.02465	0.735161	-0.0267049	-73.7316	300000	350000
OY776060.1	7	0.351951	0.398001	1.03728	0.744219	-0.0460501	-127.143	350000	400000
OY776060.1	8	0.498254	0.41848	1.24058	0.890081	0.0797736	220.252	400000	450000
OY776060.1	9	0.641054	0.419633	2.00918	1.44153	0.221422	611.338	450000	500000
OY776060.1	10	0.774672	0.617629	1.1047	0.792589	0.157042	433.59	500000	550000
OY776060.1	11	0.318992	0.226071	1.81574	1.30275	0.0929207	256.551	550000	600000
OY776060.1	12	0.719628	0.679479	1.05213	0.754872	0.0401484	110.849	600000	650000
OY776060.1	13	0.690351	0.503912	1.33751	0.959625	0.186439	514.753	650000	700000
OY776060.1	14	0.542328	0.484741	1.33407	0.957158	0.0575873	158.997	700000	750000
OY776060.1	15	0.892891	0.85605	1.22271	0.877261	0.0368415	101.718	750000	800000
OY776060.1	16	0.388094	0.392482	1.62663	1.16706	-0.00438812	-12.1155	800000	850000
OY776060.1	17	0.744285	0.561429	1.47266	1.05659	0.182856	504.86	850000	900000
OY776060.1	18	0.564697	0.507407	1.18159	0.847755	0.0572902	158.177	900000	950000
OY776060.1	19	0.493292	0.377836	0.757425	0.543431	0.115456	318.772	950000	1000000
OY776060.1	20	0.690977	0.848321	0.853039	0.612031	-0.157343	-434.421	1000000	1050000
OY776060.1	21	0.586161	0.540794	1.65373	1.1865	0.045367	125.257	1050000	1100000
OY776060.1	22	0.321458	0.210768	1.61234	1.15681	0.11069	305.612	1100000	1150000
OY776060.1	23	1.15193	0.667684	1.83378	1.31569	0.484248	1337	1150000	1200000
OY776060.1	24	1.13229	1.20248	0.963634	0.69138	-0.0701918	-193.798	1200000	1250000
OY776060.1	25	0.70606	0.894153	0.888012	0.637124	-0.188093	-519.319	1250000	1300000
OY776060.1	26	0.287361	0.309091	1.09463	0.785367	-0.0217295	-59.9945	1300000	1350000
OY776060.1	27	0.621267	0.366919	1.59944	1.14756	0.254348	702.248	1350000	1400000
OY776060.1	28	0.198799	0.171357	0.978626	0.702137	0.0274417	75.7657	1400000	1450000
OY776060.1	29	0.418549	0.446096	1.3888	0.996426	-0.0275472	-76.0571	1450000	1500000
OY776060.1	30	0.418467	0.453783	0.969277	0.695429	-0.0353163	-97.5074	1500000	1550000
OY776060.1	31	0.369439	0.293885	1.62223	1.1639	0.0755535	208.601	1550000	1600000
OY776060.1	32	0.476763	0.382382	1.98705	1.42566	0.0943812	260.584	1600000	1650000
OY776060.1	33	0.676671	0.566116	1.72541	1.23794	0.110555	305.239	1650000	1700000
OY776060.1	34	0.495028	0.41111	1.97864	1.41962	0.0839182	231.696	1700000	1750000
OY776060.1	35	0.583295	0.32035	2.28581	1.64001	0.262945	725.983	1750000	1800000
OY776060.1	36	0.753297	0.5023	1.61518	1.15884	0.250998	692.997	1800000	1850000
OY776060.1	37	0.573165	0.444301	1.32047	0.947398	0.128865	355.792	1850000	1900000
OY776060.1	38	0.515437	0.484585	1.13951	0.817567	0.0308528	85.1838	1900000	1950000
OY776060.1	39	0.556383	0.609383	0.998522	0.716411	-0.0529992	-146.329	1950000	2000000
OY776060.1	40	0.65575	0.583648	1.15928	0.83175	0.0721012	199.069	2000000	2050000
OY776060.1	41	0.536199	0.493039	1.18062	0.847065	0.0431603	119.164	2050000	2100000
OY776060.1	42	0.468876	0.557558	0.786456	0.564261	-0.0886817	-244.848	2100000	2150000
OY776060.1	43	0.57925	0.506575	1.26487	0.907507	0.0726748	200.653	2150000	2200000
OY776060.1	44	0.768006	0.511743	1.89214	1.35756	0.256263	707.534	2200000	2250000
OY776060.1	45	0.695617	0.562505	1.42847	1.02489	0.133113	367.52	2250000	2300000
OY776060.1	46	0.355398	0.277488	1.3559	0.972819	0.0779103	215.108	2300000	2350000
OY776060.1	47	0.954327	0.906731	1.19902	0.860261	0.0475957	131.41	2350000	2400000
OY776060.1	48	0.534739	0.4405	1.59977	1.14779	0.0942388	260.191	2400000	2450000
OY776060.1	49	0.123726	0.0854734	1.02527	0.735602	0.0382531	105.616	2450000	2500000
OY776060.1	50	0.356803	0.515409	0.793518	0.569327	-0.158606	-437.906	2500000	2550000
OY776060.1	51	0.240559	0.263486	0.932186	0.668817	-0.0229275	-63.3023	2550000	2600000
OY776060.1	52	0.0196865	0.00567265	1.46157	1.04863	0.0140138	38.6918	2600000	2650000
OY776060.1	53	1.06958	1.15172	1.12356	0.806126	-0.0821393	-226.784	2650000	2700000
OY776060.1	54	0.64365	0.779497	0.68841	0.493915	-0.135847	-375.069	2700000	2750000
OY776060.1	55	0.539263	0.475362	1.34349	0.963914	0.063901	176.429	2750000	2800000
OY776060.1	56	0.697197	0.701398	0.978779	0.702246	-0.00420143	-11.6	2800000	2850000
OY776060.1	57	0.883308	0.760911	1.43234	1.02766	0.122398	337.936	2850000	2900000
OY776060.1	58	0.524375	0.386848	3.72406	2.67191	0.137528	379.71	2900000	2950000
OY776060.1	59	0.373963	0.111545	9.7926	7.02592	0.262418	724.527	2950000	3000000
OY776060.1	60	0.0973098	0.0860412	1.46276	1.04949	0.0112686	31.1121	3000000	3050000
OY776060.1	61	0.162803	0.220197	1.28612	0.922758	-0.0573943	-158.464	3050000	3100000
OY776060.1	62	0.469238	0.582741	1.19367	0.856425	-0.113503	-313.378	3100000	3150000
OY776060.1	63	0.633151	0.920533	0.688137	0.493719	-0.287382	-793.455	3150000	3200000
OY776060.1	64	0.808186	1.05015	0.766883	0.550217	-0.241967	-668.063	3200000	3250000
OY776060.1	65	1.13519	1.37827	0.836855	0.60042	-0.243074	-671.121	3250000	3300000
OY776060.1	66	0.746821	0.902459	0.879469	0.630995	-0.155638	-429.711	3300000	3350000
OY776060.1	67	0.739639	1.03006	0.673562	0.483262	-0.290421	-801.843	3350000	3400000
OY776060.1	68	0.539794	0.838409	0.608285	0.436427	-0.298615	-824.468	3400000	3450000
OY776060.1	69	0.424747	0.550585	0.800044	0.574009	-0.125838	-347.435	3450000	3500000
OY776060.1	70	0.133233	0.295776	0.410909	0.294816	-0.162543	-448.778	3500000	3550000
OY776060.1	71	0.4273	0.706198	0.619241	0.444288	-0.278898	-770.03	3550000	3600000
OY776060.1	72	0.181131	0.745386	0.226656	0.162619	-0.564255	-1557.89	3600000	3650000
OY776060.1	73	0.566275	0.694729	0.832191	0.597074	-0.128453	-354.656	3650000	3700000
OY776060.1	74	0.879621	0.951629	0.948792	0.680732	-0.0720077	-198.811	3700000	3750000
OY776060.1	75	0.582095	0.797628	0.804442	0.577164	-0.215533	-595.082	3750000	3800000
OY776060.1	76	0.945507	1.18967	0.897728	0.644094	-0.24416	-674.119	3800000	3850000
OY776060.1	77	1.51785	1.78916	0.859245	0.616484	-0.271309	-749.077	3850000	3900000
OY776060.1	78	0.985998	1.25545	0.749762	0.537934	-0.269449	-743.941	3900000	3950000
OY776060.1	79	1.03802	1.52851	0.671515	0.481793	-0.490489	-1354.23	3950000	4000000
OY776060.1	80	0.853826	1.32449	0.62613	0.449231	-0.470665	-1299.49	4000000	4050000
OY776060.1	81	0.828266	1.24204	0.645621	0.463215	-0.41377	-1142.41	4050000	4100000
OY776060.1	82	0.566814	0.665174	0.557461	0.399963	-0.0983602	-271.57	4100000	4150000
OY776060.1	83	1.2525	0.971638	1.88817	1.35471	0.28086	775.447	4150000	4200000
OY776060.1	84	1.03345	1.02661	1.05625	0.757827	0.0068361	18.8743	4200000	4250000
OY776060.1	85	0.518382	0.531916	0.967571	0.694205	-0.0135347	-37.3689	4250000	4300000
OY776060.1	86	0.998809	1.00744	0.988109	0.70894	-0.00863467	-23.8401	4300000	4350000
OY776060.1	87	0.672099	0.555169	1.3521	0.970093	0.11693	322.841	4350000	4400000
OY776060.1	88	0.910737	0.873841	1.15436	0.82822	0.036896	101.869	4400000	4450000
OY776060.1	89	0.94715	1.64305	0.580625	0.416582	-0.695902	-1921.37	4450000	4500000
OY776060.1	90	1.53738	1.27961	1.27362	0.913789	0.257767	711.687	4500000	4550000
OY776060.1	91	1.11796	1.19425	1.38147	0.991168	-0.0762908	-210.637	4550000	4600000
OY776060.1	92	1.06531	0.727279	2.24864	1.61334	0.338026	933.28	4600000	4650000
OY776060.1	93	0.758382	0.705192	1.09747	0.787405	0.0531894	146.854	4650000	4700000
OY776060.1	94	0.0201959	0.0192332	0.199201	0.142921	0.000962721	2.65804	4700000	4750000
OY776060.1	95	0.178829	0.19403	0.475724	0.341319	-0.015201	-41.9696	4750000	4800000
OY776060.1	96	1.04345	0.91183	1.16684	0.837175	0.131616	363.387	4800000	4850000
OY776060.1	97	1.0047	0.807347	1.405	1.00805	0.197357	544.896	4850000	4900000
OY776060.1	98	0.578407	0.403964	1.39905	1.00378	0.174443	481.633	4900000	4950000
OY776060.1	99	0.75526	0.741169	1.06721	0.765697	0.0140914	38.906	4950000	5000000
OY776060.1	100	1.11199	0.874158	1.65367	1.18646	0.23783	656.642	5000000	5050000
OY776060.1	101	0.0626629	0.103891	0.797533	0.572208	-0.0412282	-113.83	5050000	5100000
OY776060.1	102	0.0948308	0.119269	1.01076	0.725195	-0.0244385	-67.474	5100000	5150000
OY776060.1	103	0.843497	0.64443	1.78468	1.28046	0.199067	549.618	5150000	5200000
OY776060.1	104	1.04767	0.441996	5.19535	3.72752	0.605673	1672.25	5200000	5250000
OY776060.1	105	0.901009	0.678302	12.4222	8.91262	0.222707	614.888	5250000	5300000
OY776060.1	106	0.347469	0.309885	1.24788	0.895322	0.0375849	103.771	5300000	5350000
OY776060.1	107	0.605523	0.440307	1.37746	0.988287	0.165216	456.156	5350000	5400000
OY776060.1	108	0.385135	0.611523	0.995078	0.713941	-0.226388	-625.05	5400000	5450000
OY776060.1	109	0.69569	0.616597	1.43057	1.02639	0.0790936	218.375	5450000	5500000
OY776060.1	110	0.677785	0.475699	1.43466	1.02933	0.202086	557.955	5500000	5550000
OY776060.1	111	0.66992	0.777463	0.84615	0.607089	-0.107543	-296.923	5550000	5600000
OY776060.1	112	1.4512	1.78112	0.817058	0.586216	-0.329922	-910.904	5600000	5650000
OY776060.1	113	1.4995	1.70599	0.871998	0.625634	-0.206488	-570.107	5650000	5700000
OY776060.1	114	1.90897	1.29579	1.48412	1.06482	0.613173	1692.95	5700000	5750000
OY776060.1	115	1.79969	1.29044	1.40228	1.0061	0.509252	1406.03	5750000	5800000
OY776060.1	116	1.16101	1.09711	1.03046	0.739326	0.0639002	176.426	5800000	5850000
OY776060.1	117	1.40955	1.34206	1.08006	0.774912	0.0674838	186.321	5850000	5900000
OY776060.1	118	1.57181	1.25618	1.30349	0.935216	0.31563	871.445	5900000	5950000
OY776060.1	119	1.54871	1.74569	0.914363	0.65603	-0.196977	-543.848	5950000	6000000
OY776060.1	120	1.23349	1.89165	0.652009	0.467798	-0.658159	-1817.16	6000000	6050000
OY776060.1	121	0.584806	1.20624	0.449023	0.322161	-0.621432	-1715.76	6050000	6100000
OY776060.1	122	0.833979	1.5607	0.520285	0.37329	-0.726725	-2006.47	6100000	6150000
OY776060.1	123	0.984326	1.79505	0.547408	0.39275	-0.810728	-2238.4	6150000	6200000
OY776060.1	124	1.32187	1.99547	0.668215	0.479425	-0.673605	-1859.8	6200000	6250000
OY776060.1	125	0.514847	1.39055	0.340941	0.244616	-0.875705	-2417.79	6250000	6300000
OY776060.1	126	0.299455	0.902766	0.323812	0.232326	-0.603311	-1665.72	6300000	6350000
OY776060.1	127	0.393738	0.458581	0.68606	0.492229	-0.0648434	-179.031	6350000	6400000
OY776060.1	128	0.398022	0.569492	0.467568	0.335467	-0.17147	-473.423	6400000	6450000
OY776060.1	129	1.36628	1.35677	1.02132	0.732771	0.00951205	26.2625	6450000	6500000
OY776060.1	130	1.20924	1.31095	0.940519	0.674796	-0.10171	-280.818	6500000	6550000
OY776060.1	131	1.42154	1.23352	1.14469	0.82128	0.188023	519.126	6550000	6600000
OY776060.1	132	1.2205	1.34533	0.89872	0.644807	-0.124824	-344.635	6600000	6650000
OY776060.1	133	0.146667	0.178958	1.45069	1.04083	-0.0322913	-89.1553	6650000	6700000
OY776060.1	134	1.07767	1.30058	0.842026	0.60413	-0.222912	-615.452	6700000	6750000
OY776060.1	135	1.02929	1.01852	1.00256	0.71931	0.0107658	29.7239	6750000	6800000
OY776060.1	136	1.13776	1.18644	0.976349	0.700503	-0.0486808	-134.406	6800000	6850000
OY776060.1	137	0.687679	0.85903	0.883527	0.633906	-0.171351	-473.094	6850000	6900000
OY776060.1	138	0.122706	0.161775	1.03394	0.741821	-0.0390693	-107.869	6900000	6950000
OY776060.1	139	0.367221	0.442786	0.918891	0.659278	-0.0755649	-208.632	6950000	7000000
OY776060.1	140	0.200056	0.188129	1.04799	0.751906	0.0119271	32.9304	7000000	7050000
OY776060.1	141	0.06689	0.0582404	1.3866	0.994848	0.0086496	23.8813	7050000	7100000
OY776060.1	142	0.0939442	0.0683777	1.24525	0.893433	0.0255665	70.5884	7100000	7150000
OY776060.1	143	0.0565578	0.0545324	1.22884	0.881661	0.00202541	5.59209	7150000	7200000
OY776060.1	144	0.165209	0.156536	1.00008	0.717526	0.00867311	23.9462	7200000	7250000
OY776060.1	145	0.152424	0.333632	1.00856	0.723611	-0.181208	-500.309	7250000	7300000
OY776060.1	146	0.184062	0.4544	0.355801	0.255277	-0.270339	-746.397	7300000	7350000
OY776060.1	147	0.0597036	0.201156	0.407136	0.292108	-0.141452	-390.545	7350000	7400000
OY776060.1	148	0.157454	0.284537	1.05975	0.760339	-0.127083	-350.872	7400000	7450000
OY776060.1	149	0.089974	0.0362773	3.27083	2.34673	0.0536968	148.255	7450000	7500000
OY776060.1	150	0.0858824	0.0884612	0.936825	0.672146	-0.00257874	-7.11983	7500000	7550000
OY776060.1	151	0.380801	0.127881	6.65836	4.77719	0.252919	698.302	7550000	7600000
OY776060.1	152	0.401612	0.124754	7.98323	5.72775	0.276859	764.399	7600000	7650000
OY776060.1	153	0.0771876	0.26519	0.385367	0.27649	-0.188002	-519.069	7650000	7700000
OY776060.1	154	0.739866	0.557435	2.47072	1.77267	0.18243	503.685	7700000	7750000
OY776060.1	155	0.345416	0.276895	0.983941	0.70595	0.0685214	189.185	7750000	7800000
OY776060.1	156	0.253946	0.190321	2.003	1.43709	0.0636247	175.666	7800000	7850000
OY776060.1	157	0.324166	0.0816781	11.4392	8.20727	0.242488	669.502	7850000	7900000
OY776060.1	158	0.302007	0.107112	3.73923	2.68279	0.194895	538.099	7900000	7950000
OY776060.1	159	0.271238	0.183578	1.26467	0.907367	0.0876602	242.027	7950000	8000000
OY776060.1	160	0.887682	0.842692	1.10061	0.789656	0.0449907	124.218	8000000	8050000
OY776060.1	161	0.461178	0.698362	0.716175	0.513836	-0.237184	-654.858	8050000	8100000
OY776060.1	162	0.803187	0.702338	1.17683	0.844342	0.100849	278.441	8100000	8150000
OY776060.1	163	1.33384	1.28374	1.05436	0.756472	0.0501084	138.348	8150000	8200000
OY776060.1	164	0.794921	1.05847	0.737978	0.529479	-0.26355	-727.654	8200000	8250000
OY776060.1	165	0.577838	0.785787	0.834765	0.59892	-0.20795	-574.143	8250000	8300000
OY776060.1	166	0.831393	0.786867	1.08912	0.781412	0.044526	122.935	8300000	8350000
OY776060.1	167	0.364488	0.425275	0.891092	0.639333	-0.060787	-167.831	8350000	8400000
OY776060.1	168	1.06458	1.31741	0.787148	0.564756	-0.252829	-698.054	8400000	8450000
OY776060.1	169	1.46604	1.55139	0.943116	0.676659	-0.0853527	-235.656	8450000	8500000
OY776060.1	170	1.28604	1.13716	1.16099	0.832981	0.148889	411.078	8500000	8550000
OY776060.1	171	0.719576	0.683525	0.925308	0.663882	0.0360508	99.5353	8550000	8600000
OY776060.1	172	0.277948	0.642643	0.499808	0.358598	-0.364695	-1006.91	8600000	8650000
OY776060.1	173	0.812896	1.02697	0.777845	0.558082	-0.214074	-591.053	8650000	8700000
OY776060.1	174	0.459364	0.578906	1.01161	0.7258	-0.119542	-330.051	8700000	8750000
OY776060.1	175	0.117428	0.13645	1.02777	0.7374	-0.0190224	-52.5202	8750000	8800000
OY776060.1	176	0.12006	0.102101	1.30214	0.934252	0.0179592	49.5848	8800000	8850000
OY776060.1	177	0.119067	0.303094	0.557893	0.400272	-0.184027	-508.092	8850000	8900000
OY776060.1	178	0.905199	0.31279	8.21104	5.89119	0.59241	1635.63	8900000	8950000
OY776060.1	179	0.62522	0.224819	3.58288	2.57062	0.4004	1105.49	8950000	9000000
OY776060.1	180	0.153095	0.242551	1.65795	1.18953	-0.089456	-246.985	9000000	9050000
OY776060.1	181	0.106648	0.155989	0.924228	0.663107	-0.0493406	-136.228	9050000	9100000
OY776060.1	182	0.286121	0.191743	1.91326	1.37271	0.0943781	260.575	9100000	9150000
OY776060.1	183	0.0874399	0.11681	1.08653	0.779553	-0.0293696	-81.0886	9150000	9200000
OY776060.1	184	0.7484	0.388164	2.02747	1.45465	0.360236	994.6	9200000	9250000
OY776060.1	185	0.870129	0.402154	2.19422	1.57429	0.467975	1292.07	9250000	9300000
OY776060.1	186	0.868962	0.259612	5.16165	3.70334	0.60935	1682.4	9300000	9350000
OY776060.1	187	0.302776	0.164449	2.17695	1.5619	0.138327	381.917	9350000	9400000
OY776060.1	188	0.162372	0.122626	1.55584	1.11627	0.0397465	109.739	9400000	9450000
OY776060.1	189	0.161061	0.146476	1.31026	0.940076	0.014585	40.2688	9450000	9500000
OY776060.1	190	0.261178	0.493415	0.508969	0.365171	-0.232238	-641.201	9500000	9550000
OY776060.1	191	0.362015	0.235075	3.20016	2.29602	0.12694	350.478	9550000	9600000
OY776060.1	192	0.10906	0.10404	2.51237	1.80256	0.0050198	13.8595	9600000	9650000
OY776060.1	193	0.518559	0.303993	1.77836	1.27592	0.214567	592.412	9650000	9700000
OY776060.1	194	0.718417	0.400905	1.85721	1.3325	0.317512	876.641	9700000	9750000
OY776060.1	195	0.768853	0.57477	1.51052	1.08376	0.194084	535.859	9750000	9800000
OY776060.1	196	0.646083	0.676547	0.875627	0.628238	-0.030464	-84.1101	9800000	9850000
OY776060.1	197	0.518619	0.534052	1.04584	0.750363	-0.015433	-42.6101	9850000	9900000
OY776060.1	198	0.0344627	0.201732	0.382063	0.274119	-0.167269	-461.825	9900000	9950000
OY776060.1	199	0.0187469	0.0902673	0.280705	0.201398	-0.0715204	-197.466	9950000	10000000
OY776060.1	200	0.46862	0.56777	0.736961	0.528749	-0.0991503	-273.751	10000000	10050000
OY776060.1	201	0.894944	1.21106	0.791785	0.568084	-0.316118	-872.792	10050000	10100000
OY776060.1	202	0.994592	1.59945	0.802084	0.575473	-0.604854	-1669.98	10100000	10150000
OY776060.1	203	0.928251	0.633287	1.34074	0.961946	0.294964	814.388	10150000	10200000
OY776060.1	204	0.745997	0.640407	1.21055	0.868533	0.105589	291.529	10200000	10250000
OY776060.1	205	0.472144	0.947599	0.505058	0.362365	-0.475455	-1312.72	10250000	10300000
OY776060.1	206	0.811038	1.16167	0.680301	0.488097	-0.350628	-968.075	10300000	10350000
OY776060.1	207	0.604325	0.734835	0.88091	0.632028	-0.13051	-360.335	10350000	10400000
OY776060.1	208	1.0794	1.25456	0.879618	0.631101	-0.175168	-483.633	10400000	10450000
OY776060.1	209	1.01433	0.849147	1.26427	0.907081	0.165183	456.065	10450000	10500000
OY776060.1	210	0.846677	0.728981	1.36963	0.982668	0.117696	324.955	10500000	10550000
OY776060.1	211	0.197063	0.347952	1.30935	0.939421	-0.150889	-416.6	10550000	10600000
OY776060.1	212	0.601534	0.662925	0.93535	0.671087	-0.0613907	-169.498	10600000	10650000
OY776060.1	213	0.876828	1.07313	1.06349	0.763027	-0.1963	-541.98	10650000	10700000
OY776060.1	214	1.34038	1.14185	1.18799	0.852349	0.198532	548.142	10700000	10750000
OY776060.1	215	1.36687	0.986201	1.50139	1.07721	0.380673	1051.03	10750000	10800000
OY776060.1	216	1.03134	0.655729	1.44898	1.0396	0.375616	1037.06	10800000	10850000
OY776060.1	217	0.203991	0.283526	0.921135	0.660889	-0.0795348	-219.593	10850000	10900000
OY776060.1	218	0.367284	0.265648	1.57939	1.13317	0.101636	280.614	10900000	10950000
OY776060.1	219	0.800538	1.05728	0.723908	0.519384	-0.256744	-708.862	10950000	11000000
OY776060.1	220	1.0346	1.04618	1.02678	0.736684	-0.0115869	-31.9911	11000000	11050000
OY776060.1	221	0.811765	1.0067	0.71977	0.516415	-0.194935	-538.211	11050000	11100000
OY776060.1	222	0.987984	1.09504	0.793161	0.56907	-0.107051	-295.566	11100000	11150000
OY776060.1	223	0.424579	0.389516	0.991412	0.71131	0.0350639	96.8104	11150000	11200000
OY776060.1	224	0.547101	0.758227	0.684702	0.491254	-0.211126	-582.913	11200000	11250000
OY776060.1	225	0.326912	0.32314	1.14643	0.822528	0.00377182	10.4139	11250000	11300000
OY776060.1	226	0.354128	0.130957	4.31437	3.09544	0.223171	616.169	11300000	11350000
OY776060.1	227	0.175041	0.11755	1.17078	0.84	0.0574909	158.731	11350000	11400000
OY776060.1	228	0.129207	0.0816391	1.88588	1.35307	0.0475683	131.335	11400000	11450000
OY776060.1	229	0.0712759	0.0904905	0.826411	0.592927	-0.0192146	-53.0509	11450000	11500000
OY776060.1	230	0.24336	0.142145	2.78304	1.99675	0.101215	279.451	11500000	11550000
OY776060.1	231	0.435552	0.387168	1.1504	0.825376	0.0483839	133.587	11550000	11600000
OY776060.1	232	0.630281	0.518242	1.28964	0.925283	0.112039	309.337	11600000	11650000
OY776060.1	233	0.106604	0.156857	0.521696	0.374302	-0.0502532	-138.748	11650000	11695000
OY776060.1	234	0.119041	0.200816	1.08919	0.781466	-0.0817751	-225.779	11700000	11750000
OY776060.1	235	0.117197	0.0921598	1.17554	0.843414	0.0250371	69.1266	11750000	11800000
OY776060.1	236	0.446352	0.380493	1.3249	0.950578	0.065859	181.835	11800000	11850000
OY776060.1	237	0.413075	0.50419	0.868162	0.622882	-0.0911155	-251.567	11850000	11900000
OY776060.1	238	0.398617	0.348557	1.15772	0.830629	0.0500598	138.214	11900000	11950000
OY776060.1	239	0.564535	0.538739	1.21575	0.872268	0.0257959	71.2217	11950000	12000000
OY776060.1	240	0.280876	0.161741	2.6205	1.88013	0.119135	328.929	12000000	12050000
OY776060.1	241	1.31802	1.14169	7.54885	5.41609	0.176326	486.831	12050000	12100000
OY776060.1	242	0.585016	0.673162	1.01008	0.724705	-0.0881461	-243.369	12100000	12150000
OY776060.1	243	0.208674	0.572707	0.377635	0.270943	-0.364033	-1005.08	12150000	12200000
OY776060.1	244	0.339833	0.897904	0.365363	0.262137	-0.558071	-1540.82	12200000	12250000
OY776060.1	245	0.37102	0.291689	1.60145	1.149	0.0793305	219.029	12250000	12300000
OY776060.1	246	0.202085	0.202918	1.26888	0.910389	-0.000833284	-2.30067	12300000	12350000
OY776060.1	247	0.184929	0.215602	2.9494	2.11611	-0.0306729	-84.6869	12350000	12400000
OY776060.1	248	0.175829	0.35875	2.59514	1.86194	-0.182921	-505.041	12400000	12450000
OY776060.1	249	0.412566	0.413422	1.87531	1.34548	-0.000855568	-2.3622	12450000	12500000
OY776060.1	250	0.09277	0.191936	0.50088	0.359368	-0.0991662	-273.795	12500000	12550000
OY776060.1	251	0.230382	0.306553	0.794379	0.569945	-0.0761708	-210.305	12550000	12600000
OY776060.1	252	0.249743	0.229674	1.00403	0.720363	0.0200685	55.4085	12600000	12650000
OY776060.1	253	0.06279	0.0928925	0.808768	0.580269	-0.0301024	-83.1119	12650000	12700000
OY776060.1	254	0.0994286	0.115842	0.951015	0.682327	-0.0164131	-45.316	12700000	12750000
OY776060.1	255	0.0740398	0.148967	0.540966	0.388128	-0.074927	-206.871	12750000	12800000
OY776060.1	256	0.14818	0.199323	0.896614	0.643295	-0.051143	-141.204	12800000	12850000
OY776060.1	257	0.0894422	0.313821	0.277546	0.199132	-0.224379	-619.504	12850000	12900000
OY776060.1	258	0.0807939	0.325609	0.318573	0.228568	-0.244815	-675.927	12900000	12950000
OY776060.1	259	0.0866876	0.145495	0.489981	0.351547	-0.0588075	-162.366	12950000	13000000
OY776060.1	260	0.0513619	0.0503436	1.94018	1.39202	0.00101827	2.81142	13000000	13050000
OY776060.1	261	0.0309692	0.0297925	1.35969	0.975538	0.00117667	3.24874	13050000	13100000
OY776060.1	262	0.138508	0.115428	0.97132	0.696895	0.0230799	63.7229	13100000	13150000
OY776060.1	263	0.264726	0.238957	1.49914	1.07559	0.0257688	71.1468	13150000	13200000
OY776060.1	264	0.342044	0.248672	1.38805	0.99589	0.0933724	257.798	13200000	13250000
OY776060.1	265	0.210036	0.23168	1.44461	1.03647	-0.021644	-59.7585	13250000	13300000
OY776060.1	266	0.471098	0.390052	1.28953	0.925203	0.0810459	223.765	13300000	13350000
OY776060.1	267	0.0893775	0.426689	0.20192	0.144872	-0.337311	-931.307	13350000	13400000
OY776060.1	268	0.111774	0.104671	1.47023	1.05485	0.00710358	19.6128	13400000	13450000
OY776060.1	269	0.277068	0.150801	1.91887	1.37673	0.126267	348.62	13450000	13500000
OY776060.1	270	0.721909	0.184559	5.53106	3.96838	0.53735	1483.61	13500000	13550000
OY776060.1	271	1.01894	0.183647	11.2878	8.09868	0.835291	2306.21	13550000	13600000
OY776060.1	272	0.0468955	0.338069	0.147452	0.105793	-0.291174	-803.923	13600000	13650000
OY776060.1	273	0.197814	0.358869	0.576038	0.413291	-0.161055	-444.668	13650000	13700000
OY776060.1	274	0.263984	0.591939	0.447408	0.321003	-0.327954	-905.472	13700000	13750000
OY776060.1	275	0.109643	0.136237	0.878681	0.630429	-0.0265943	-73.4262	13750000	13800000
OY776060.1	276	0.199809	0.258513	1.09841	0.78808	-0.0587041	-162.08	13800000	13850000
OY776060.1	277	0.305114	0.575574	0.615337	0.441487	-0.27046	-746.732	13850000	13900000
OY776060.1	278	0.637693	0.633689	1.04418	0.749169	0.00400415	11.0553	13900000	13950000
OY776060.1	279	0.126666	0.148582	1.05401	0.756222	-0.021916	-60.5094	13950000	14000000
OY776060.1	280	0.0988737	0.265845	0.403654	0.289611	-0.166971	-461.003	14000000	14050000
OY776060.1	281	0.328016	0.256589	2.38857	1.71373	0.0714261	197.205	14050000	14100000
OY776060.1	282	0.115403	0.0629081	1.9788	1.41973	0.0524945	144.936	14100000	14150000
OY776060.1	283	0.399587	0.158268	6.7021	4.80857	0.241319	666.274	14150000	14200000
OY776060.1	284	0.0492673	0.0725207	0.760275	0.545476	-0.0232535	-64.2022	14200000	14250000
OY776060.1	285	0.209392	0.355595	0.638666	0.458225	-0.146203	-403.662	14250000	14300000
OY776060.1	286	0.0889394	0.383431	0.269249	0.193178	-0.294491	-813.082	14300000	14350000
OY776060.1	287	1.00557	0.271178	3.09015	2.2171	0.734389	2027.63	14350000	14400000
OY776060.1	288	0.937294	0.160899	9.7159	6.97088	0.776396	2143.61	14400000	14450000
OY776060.1	289	0.690924	0.149618	11.4907	8.24424	0.541306	1494.53	14450000	14500000
OY776060.1	290	0.697025	0.0445183	18.2368	13.0844	0.652507	1801.55	14500000	14550000
OY776060.1	291	1.17984	0.738092	2.22284	1.59482	0.441747	1219.65	14550000	14600000
OY776060.1	292	1.1753	1.03154	1.1954	0.857667	0.143757	396.91	14600000	14650000
OY776060.1	293	0.781579	0.996547	0.802902	0.57606	-0.214968	-593.521	14650000	14700000
OY776060.1	294	0.755142	1.44553	0.525749	0.37721	-0.690385	-1906.13	14700000	14750000
OY776060.1	295	1.23955	1.32696	0.937311	0.672495	-0.0874048	-241.322	14750000	14800000
OY776060.1	296	1.08613	1.109	0.992719	0.712248	-0.0228661	-63.1326	14800000	14850000
OY776060.1	297	1.44811	1.16629	1.25168	0.898042	0.281822	778.103	14850000	14900000
OY776060.1	298	1.09537	1.03162	0.918505	0.659002	0.0637536	176.022	14900000	14950000
OY776060.1	299	1.13748	1.38785	0.816097	0.585527	-0.250369	-691.26	14950000	15000000
OY776060.1	300	0.724941	0.944539	0.840399	0.602963	-0.219598	-606.303	15000000	15050000
OY776060.1	301	0.303284	0.115774	4.5072	3.23379	0.18751	517.71	15050000	15100000
OY776060.1	302	0.41896	0.65537	0.69804	0.500824	-0.23641	-652.722	15100000	15150000
OY776060.1	303	1.44966	1.37998	1.04618	0.750607	0.0696868	192.403	15150000	15200000
OY776060.1	304	1.32243	1.32476	1.00836	0.723472	-0.0023351	-6.44713	15200000	15250000
OY776060.1	305	1.44612	1.10711	1.2027	0.862902	0.339004	935.981	15250000	15300000
OY776060.1	306	1.7167	1.46547	1.1871	0.851711	0.251236	693.654	15300000	15350000
OY776060.1	307	1.39827	1.24631	1.22493	0.878851	0.151956	419.546	15350000	15400000
OY776060.1	308	1.34571	1.45639	0.909032	0.652205	-0.110676	-305.574	15400000	15450000
OY776060.1	309	0.888625	0.99179	0.887023	0.636414	-0.103165	-284.836	15450000	15500000
OY776060.1	310	0.21618	0.135261	2.04349	1.46615	0.0809195	223.416	15500000	15550000
OY776060.1	311	0.689223	0.299954	5.67082	4.06866	0.389269	1074.76	15550000	15600000
OY776060.1	312	0.71333	0.413297	1.73128	1.24215	0.300034	828.384	15600000	15650000
OY776060.1	313	0.503612	0.457929	1.85923	1.33394	0.0456826	126.128	15650000	15700000
OY776060.1	314	0.148264	0.095201	1.51041	1.08368	0.0530629	146.505	15700000	15750000
OY776060.1	315	0.275178	0.413558	0.925476	0.664003	-0.138381	-382.065	15750000	15800000
OY776060.1	316	0.102006	0.109708	7.95317	5.70617	-0.00770165	-21.264	15800000	15850000
OY776060.1	317	0.238533	0.20467	1.7484	1.25443	0.0338624	93.4931	15850000	15900000
OY776060.1	318	0.0582381	0.048769	1.34596	0.965688	0.00946915	26.144	15900000	15950000
OY776060.1	319	0.123203	0.0781905	2.03784	1.46209	0.0450124	124.278	15950000	16000000
OY776060.1	320	0.117019	0.190896	1.15464	0.828425	-0.0738769	-203.972	16000000	16050000
OY776060.1	321	0.285895	0.273371	1.09864	0.78824	0.0125236	34.5774	16050000	16100000
OY776060.1	322	0.989577	0.965712	1.03961	0.745892	0.0238656	65.8922	16100000	16150000
OY776060.1	323	1.26138	1.26391	1.02217	0.73338	-0.00253056	-6.98681	16150000	16200000
OY776060.1	324	1.78726	1.72411	1.04081	0.746754	0.063154	174.366	16200000	16250000
OY776060.1	325	0.722549	0.682007	0.761064	0.546042	0.0405417	111.934	16250000	16300000
OY776060.1	326	1.63384	1.50421	1.11825	0.802315	0.12963	357.905	16300000	16350000
OY776060.1	327	1.54918	1.50703	1.02104	0.732569	0.0421515	116.379	16350000	16400000
OY776060.1	328	0.463551	0.483822	1.01939	0.731381	-0.0202708	-55.9671	16400000	16450000
OY776060.1	329	1.02517	0.757351	1.41054	1.01203	0.267819	739.44	16450000	16500000
OY776060.1	330	1.35237	0.747509	1.89372	1.35869	0.604862	1670.01	16500000	16550000
OY776060.1	331	1.37836	0.849444	1.94117	1.39273	0.528911	1460.31	16550000	16600000
OY776060.1	332	1.01607	0.907276	1.10021	0.789369	0.108793	300.374	16600000	16650000
OY776060.1	333	0.831384	0.840844	1.06664	0.765283	-0.00945925	-26.1167	16650000	16700000
OY776060.1	334	0.293047	0.112186	3.95398	2.83687	0.18086	499.35	16700000	16750000
OY776060.1	335	0.446816	0.132675	4.4603	3.20014	0.314141	867.333	16750000	16800000
OY776060.1	336	0.157867	0.0595736	5.76517	4.13635	0.0982933	271.385	16800000	16850000
OY776060.1	337	0.770957	0.456148	5.89718	4.23106	0.314809	869.179	16850000	16900000
OY776060.1	338	0.0790917	0.145509	1.06241	0.762248	-0.0664174	-183.377	16900000	16950000
OY776060.1	339	0.118966	0.128571	1.29146	0.926587	-0.00960492	-26.5189	16950000	17000000
OY776060.1	340	0.175098	0.0614107	5.14314	3.69006	0.113688	313.888	17000000	17050000
OY776060.1	341	0.22069	0.0688009	3.26333	2.34135	0.151889	419.361	17050000	17100000
OY776060.1	342	0.157303	0.076246	2.43196	1.74487	0.0810572	223.796	17100000	17150000
OY776060.1	343	0.535945	0.110012	7.3165	5.24938	0.425934	1175.99	17150000	17200000
OY776060.1	344	0.250461	0.0777559	8.5761	6.15311	0.172705	476.834	17200000	17250000
OY776060.1	345	0.16	0.157283	1.80188	1.2928	0.00271694	7.5014	17250000	17300000
OY776060.1	346	0.165039	0.0704204	3.07952	2.20947	0.0946186	261.239	17300000	17350000
OY776060.1	347	0.23299	0.131993	7.91453	5.67845	0.100997	278.849	17350000	17400000
OY776060.1	348	0.549403	0.729462	0.865177	0.62074	-0.180059	-497.137	17400000	17450000
OY776060.1	349	0.648858	0.762975	0.852842	0.61189	-0.114117	-315.073	17450000	17500000
OY776060.1	350	0.442304	0.584366	0.706309	0.506757	-0.142063	-392.231	17500000	17550000
OY776060.1	351	0.151004	0.17797	0.930763	0.667797	-0.0269659	-74.4521	17550000	17600000
OY776060.1	352	1.29949	1.55421	0.847469	0.608035	-0.254713	-703.255	17600000	17650000
OY776060.1	353	0.851335	0.992868	1.02404	0.734723	-0.141533	-390.767	17650000	17700000
OY776060.1	354	0.655618	0.253369	3.59508	2.57937	0.402249	1110.6	17700000	17750000
OY776060.1	355	0.811839	0.84636	1.3315	0.955311	-0.0345205	-95.31	17750000	17800000
OY776060.1	356	0.858549	0.885712	0.888251	0.637295	-0.0271625	-74.9949	17800000	17850000
OY776060.1	357	0.709764	0.913234	0.920091	0.66014	-0.20347	-561.776	17850000	17900000
OY776060.1	358	0.760472	0.856186	0.921199	0.660934	-0.0957142	-264.264	17900000	17950000
OY776060.1	359	0.626262	0.678581	0.939854	0.674319	-0.0523192	-144.452	17950000	18000000
OY776060.1	360	0.695663	0.95759	0.733862	0.526525	-0.261926	-723.171	18000000	18050000
OY776060.1	361	1.45966	1.49979	0.980995	0.703836	-0.0401252	-110.784	18050000	18100000
OY776060.1	362	1.33558	1.40775	0.940029	0.674445	-0.07217	-199.259	18100000	18135000
OY776061.1	0	1.41107	1.68487	0.836889	0.600445	-0.273792	-755.933	0	50000
OY776061.1	1	1.91332	1.84674	1.04091	0.746821	0.0665861	183.842	50000	100000
OY776061.1	2	1.92091	1.66931	1.16182	0.833575	0.251605	694.673	100000	150000
OY776061.1	3	1.15559	1.26859	0.949069	0.68093	-0.113001	-311.994	150000	200000
OY776061.1	4	0.606944	0.750814	0.736752	0.528599	-0.14387	-397.221	200000	250000
OY776061.1	5	1.20721	1.12795	1.19393	0.856608	0.0792623	218.841	250000	300000
OY776061.1	6	1.13923	0.953603	1.23972	0.889465	0.185628	512.515	300000	350000
OY776061.1	7	1.35569	1.3353	1.09031	0.782267	0.0203948	56.3095	350000	400000
OY776061.1	8	1.10676	1.24377	0.907658	0.651219	-0.137007	-378.272	400000	450000
OY776061.1	9	1.05819	0.948419	1.11152	0.797483	0.109776	303.087	450000	500000
OY776061.1	10	1.06213	0.959143	1.08955	0.781721	0.102986	284.34	500000	550000
OY776061.1	11	1.33297	1.31006	1.02236	0.733512	0.0229066	63.2444	550000	600000
OY776061.1	12	1.40894	1.62029	0.883229	0.633692	-0.211348	-583.524	600000	650000
OY776061.1	13	1.38705	1.59883	0.813333	0.583543	-0.211778	-584.713	650000	700000
OY776061.1	14	1.61621	1.55438	1.03798	0.744723	0.0618381	170.733	700000	750000
OY776061.1	15	0.982288	1.038	0.947344	0.679693	-0.0557171	-153.833	750000	800000
OY776061.1	16	0.93553	1.09264	0.853041	0.612033	-0.157114	-433.787	800000	850000
OY776061.1	17	1.35414	1.5828	0.855631	0.613892	-0.22866	-631.322	850000	900000
OY776061.1	18	1.30888	1.12633	1.20102	0.861699	0.182553	504.023	900000	950000
OY776061.1	19	0.733373	0.972714	0.790669	0.567283	-0.239341	-660.813	950000	1000000
OY776061.1	20	1.33912	1.26189	1.05919	0.759942	0.0772344	213.242	1000000	1050000
OY776061.1	21	0.711528	0.572419	1.2965	0.930202	0.13911	384.078	1050000	1100000
OY776061.1	22	1.41736	1.39189	1.03115	0.739823	0.0254715	70.326	1100000	1150000
OY776061.1	23	0.955781	0.964881	0.979427	0.702712	-0.00909934	-25.123	1150000	1200000
OY776061.1	24	1.321	1.45725	0.925461	0.663992	-0.136249	-376.179	1200000	1250000
OY776061.1	25	1.59154	1.32983	1.24586	0.893867	0.261709	722.571	1250000	1300000
OY776061.1	26	1.32566	1.19609	1.20827	0.866897	0.129571	357.742	1300000	1350000
OY776061.1	27	1.63595	1.56384	1.06656	0.765224	0.0721096	199.092	1350000	1400000
OY776061.1	28	1.59821	1.29232	1.22097	0.876015	0.305893	844.562	1400000	1450000
OY776061.1	29	1.68915	1.58319	1.08387	0.777649	0.105961	292.556	1450000	1500000
OY776061.1	30	1.3701	1.40595	1.02845	0.737881	-0.035843	-98.9613	1500000	1550000
OY776061.1	31	1.24218	1.51583	0.831002	0.596221	-0.273652	-755.545	1550000	1600000
OY776061.1	32	1.47169	1.19449	1.33798	0.959962	0.277196	765.329	1600000	1650000
OY776061.1	33	1.18905	1.50282	0.772827	0.554481	-0.313775	-866.325	1650000	1700000
OY776061.1	34	1.50409	1.26857	1.19711	0.858896	0.23552	650.264	1700000	1750000
OY776061.1	35	1.12262	1.50008	0.766085	0.549645	-0.377469	-1042.18	1750000	1800000
OY776061.1	36	1.20899	1.27796	0.983479	0.705618	-0.0689693	-190.422	1800000	1850000
OY776061.1	37	1.34766	1.23625	1.0685	0.766618	0.111407	307.592	1850000	1900000
OY776061.1	38	1.60997	1.55044	1.01422	0.727675	0.0595364	164.378	1900000	1950000
OY776061.1	39	0.751279	1.02923	0.653675	0.468993	-0.277946	-767.401	1950000	2000000
OY776061.1	40	2.02794	1.8702	1.09876	0.788326	0.157738	435.511	2000000	2050000
OY776061.1	41	1.77321	1.62087	1.16702	0.837306	0.152346	420.622	2050000	2100000
OY776061.1	42	1.56488	1.44285	1.08079	0.775438	0.122031	336.925	2100000	2150000
OY776061.1	43	0.570342	0.392303	1.99018	1.4279	0.178039	491.56	2150000	2200000
OY776061.1	44	1.55513	1.13252	1.46304	1.04969	0.422611	1166.82	2200000	2250000
OY776061.1	45	1.42838	1.12149	1.51237	1.08508	0.306886	847.304	2250000	2300000
OY776061.1	46	1.07703	0.806723	4.41278	3.16604	0.27031	746.318	2300000	2350000
OY776061.1	47	1.3156	1.55112	0.850098	0.609921	-0.235521	-650.266	2350000	2400000
OY776061.1	48	1.4305	1.19144	1.04588	0.750387	0.239057	660.029	2400000	2450000
OY776061.1	49	1.51768	1.75573	0.885367	0.635226	-0.238044	-657.234	2450000	2500000
OY776061.1	50	1.72744	1.76526	0.975206	0.699683	-0.0378223	-104.426	2500000	2550000
OY776061.1	51	1.78326	1.97179	0.903233	0.648045	-0.188527	-520.519	2550000	2600000
OY776061.1	52	1.62344	1.99296	0.835425	0.599394	-0.369516	-1020.22	2600000	2650000
OY776061.1	53	2.01979	0.932384	2.24308	1.60935	1.08741	3002.31	2650000	2700000
OY776061.1	54	1.94076	1.29985	1.32533	0.950888	0.640919	1769.56	2700000	2750000
OY776061.1	55	1.38934	1.24789	1.17471	0.842818	0.141453	390.548	2750000	2800000
OY776061.1	56	1.33756	1.40332	0.933453	0.669726	-0.0657547	-181.547	2800000	2850000
OY776061.1	57	1.57823	1.37185	1.22295	0.877431	0.206379	569.807	2850000	2900000
OY776061.1	58	1.45187	1.53171	0.956545	0.686294	-0.0798344	-220.421	2900000	2950000
OY776061.1	59	1.89735	1.82421	1.03957	0.745861	0.0731402	201.938	2950000	3000000
OY776061.1	60	1.71537	1.69742	1.03031	0.739216	0.0179454	49.5469	3000000	3050000
OY776061.1	61	2.23047	2.26184	0.985575	0.707123	-0.03137	-86.6115	3050000	3100000
OY776061.1	62	2.09499	2.08814	1.0037	0.720128	0.00685297	18.9208	3100000	3150000
OY776061.1	63	2.17493	2.16552	1.005	0.721062	0.009403	25.9614	3150000	3200000
OY776061.1	64	2.25752	2.20257	1.02738	0.737119	0.0549518	151.72	3200000	3250000
OY776061.1	65	2.01588	1.94746	1.03317	0.741269	0.0684182	188.901	3250000	3300000
OY776061.1	66	0.464361	0.509822	1.07578	0.771841	-0.0454617	-125.518	3300000	3350000
OY776061.1	67	1.60393	1.77281	0.905936	0.649983	-0.168881	-466.275	3350000	3400000
OY776061.1	68	1.92791	1.9313	0.995813	0.714468	-0.00339574	-9.37554	3400000	3450000
OY776061.1	69	0.0203479	0.0559608	0.0610648	0.0438123	-0.0356129	-98.3263	3450000	3500000
OY776061.1	70	0.00263141	0.00220068	0.620666	0.445311	0.00043073	1.18923	3500000	3550000
OY776061.1	71	0.000860238	0.000464874	0.210521	0.151043	0.000395363	1.09159	3550000	3600000
OY776061.1	72	0.00557805	0.0034849	0.592533	0.425126	0.00209315	5.77913	3600000	3650000
OY776061.1	73	0.00700001	0.00370142	1.29468	0.928898	0.00329859	9.10731	3650000	3695000
OY776061.1	74	0.00585847	0.00538665	0.534011	0.383138	0.000471819	1.30268	3700000	3750000
OY776061.1	75	0.00482032	0.00395482	0.753321	0.540487	0.000865506	2.38964	3750000	3795000
OY776061.1	76	0.0361686	0.0183877	2.55283	1.83158	0.0177809	49.0925	3800000	3850000
OY776061.1	77	0.00609513	0.00424649	1.18068	0.847107	0.00184865	5.10406	3850000	3900000
OY776061.1	78	0.0271275	0.013898	0.904566	0.649001	0.0132294	36.526	3900000	3950000
OY776061.1	79	0.00734398	0.00576208	0.267337	0.191807	0.0015819	4.36758	3950000	4000000
OY776061.1	80	0.0418036	0.043116	0.772115	0.553971	-0.00131241	-3.62353	4000000	4035000
OY776061.1	81	0.0620276	0.0232517	1.86774	1.34005	0.0387759	107.059	4050000	4100000
OY776061.1	82	0.145841	0.0917428	0.913497	0.655408	0.0540982	149.363	4100000	4150000
OY776061.1	83	0.0573794	0.183319	0.87077	0.624753	-0.125939	-347.715	4150000	4200000
OY776061.1	84	0.000624314	0.000380215	0.597159	0.428445	0.000244099	0.673949	4200000	4250000
OY776061.1	85	0.00268683	0.00333765	0.482421	0.346124	-0.000650816	-1.79688	4250000	4300000
OY776061.1	86	0.102799	0.128845	0.168974	0.121234	-0.026046	-71.9121	4300000	4350000
OY776061.1	87	0.0172884	0.00685285	1.97795	1.41912	0.0104356	28.8123	4350000	4400000
OY776061.1	88	0.00741558	0.0104977	0.970116	0.696031	-0.00308208	-8.50952	4400000	4450000
OY776061.1	89	0.0555161	0.0310236	0.897661	0.644047	0.0244924	67.6229	4450000	4500000
OY776061.1	90	0.244405	0.149306	2.79127	2.00266	0.0950995	262.567	4500000	4550000
OY776061.1	91	0.557513	0.311971	1.78479	1.28054	0.245543	677.936	4550000	4600000
OY776061.1	92	0.711091	0.462454	1.68963	1.21226	0.248637	686.478	4600000	4650000
OY776061.1	93	1.38904	1.2592	1.13298	0.81288	0.12984	358.485	4650000	4700000
OY776061.1	94	0.758338	0.382717	2.16292	1.55184	0.375621	1037.08	4700000	4750000
OY776061.1	95	1.56676	1.17491	1.48683	1.06676	0.391848	1081.88	4750000	4800000
OY776061.1	96	1.69362	1.47005	1.21959	0.875024	0.223565	617.256	4800000	4850000
OY776061.1	97	1.85586	1.71696	1.21083	0.868737	0.138899	383.495	4850000	4900000
OY776061.1	98	2.02327	1.93128	1.04964	0.753087	0.0919907	253.984	4900000	4950000
OY776061.1	99	1.99683	1.8613	1.07506	0.771328	0.135536	374.212	4950000	5000000
OY776061.1	100	1.91605	1.81174	1.0618	0.761814	0.104312	288.003	5000000	5050000
OY776061.1	101	1.97917	1.96357	1.01815	0.730493	0.015591	43.0462	5050000	5100000
OY776061.1	102	1.84951	1.6786	1.13295	0.81286	0.170908	471.871	5100000	5150000
OY776061.1	103	1.87891	1.80512	1.06685	0.765432	0.0737898	203.731	5150000	5200000
OY776061.1	104	1.58882	1.23112	1.34783	0.967031	0.357706	987.615	5200000	5250000
OY776061.1	105	1.83351	1.70811	1.07438	0.77084	0.125401	346.229	5250000	5300000
OY776061.1	106	1.29558	1.01196	1.38732	0.995366	0.283612	783.045	5300000	5350000
OY776061.1	107	1.60311	1.40488	1.18349	0.849118	0.198228	547.302	5350000	5400000
OY776061.1	108	1.46343	1.69369	0.873473	0.626692	-0.230255	-635.727	5400000	5450000
OY776061.1	109	1.67284	1.81018	0.920538	0.66046	-0.137332	-379.171	5450000	5500000
OY776061.1	110	2.00069	1.91111	1.05026	0.753529	0.0895786	247.324	5500000	5550000
OY776061.1	111	2.00215	1.83925	1.10878	0.795519	0.162893	449.742	5550000	5600000
OY776061.1	112	1.83731	1.90429	0.972226	0.697545	-0.0669794	-184.928	5600000	5650000
OY776061.1	113	2.0774	2.13364	0.97607	0.700303	-0.0562376	-155.27	5650000	5700000
OY776061.1	114	1.9696	2.03682	0.974448	0.699139	-0.0672189	-185.589	5700000	5750000
OY776061.1	115	2.05408	2.09654	0.979676	0.70289	-0.0424591	-117.228	5750000	5800000
OY776061.1	116	1.58072	1.55279	1.02652	0.736499	0.0279225	77.0933	5800000	5850000
OY776061.1	117	1.40363	1.59884	0.870474	0.624541	-0.195209	-538.966	5850000	5900000
OY776061.1	118	1.3271	1.52804	0.864892	0.620536	-0.200948	-554.813	5900000	5950000
OY776061.1	119	1.43156	1.79224	0.803512	0.576497	-0.36068	-995.826	5950000	6000000
OY776061.1	120	1.64016	1.64774	0.980761	0.703668	-0.00757118	-20.9038	6000000	6050000
OY776061.1	121	1.05506	1.12031	0.847294	0.60791	-0.0652549	-180.167	6050000	6100000
OY776061.1	122	1.79609	1.80246	1.02634	0.736368	-0.00636531	-17.5744	6100000	6150000
OY776061.1	123	1.12089	1.1345	1.10801	0.794963	-0.0136084	-37.5724	6150000	6200000
OY776061.1	124	1.16206	0.861933	1.57781	1.13204	0.300129	828.649	6200000	6250000
OY776061.1	125	1.66501	1.78176	0.93151	0.668332	-0.116753	-322.35	6250000	6300000
OY776061.1	126	1.35843	1.8503	0.745954	0.535201	-0.491871	-1358.04	6300000	6350000
OY776061.1	127	1.29061	1.25464	1.16527	0.836045	0.0359765	99.3301	6350000	6400000
OY776061.1	128	0.546545	0.352125	1.75351	1.25809	0.19442	536.788	6400000	6450000
OY776061.1	129	1.49699	1.84865	0.787965	0.565343	-0.351663	-970.932	6450000	6500000
OY776061.1	130	1.75859	1.73628	1.01769	0.730166	0.0223172	61.6171	6500000	6550000
OY776061.1	131	1.1955	1.37735	0.866989	0.62204	-0.181853	-502.092	6550000	6600000
OY776061.1	132	1.33372	1.57131	0.828622	0.594513	-0.237596	-655.996	6600000	6650000
OY776061.1	133	1.13268	1.51818	0.770041	0.552483	-0.385496	-1064.34	6650000	6700000
OY776061.1	134	1.36461	1.63436	0.813827	0.583898	-0.269744	-744.756	6700000	6750000
OY776061.1	135	1.39766	1.61957	0.886791	0.636247	-0.221914	-612.699	6750000	6800000
OY776061.1	136	1.68305	1.60357	1.16519	0.835988	0.0794839	219.453	6800000	6850000
OY776061.1	137	1.77857	1.68674	1.0542	0.756362	0.0918326	253.547	6850000	6900000
OY776061.1	138	1.74963	1.66773	1.06061	0.760955	0.0819017	226.128	6900000	6950000
OY776061.1	139	1.09334	1.25629	0.880282	0.631577	-0.162948	-449.894	6950000	7000000
OY776061.1	140	1.57094	1.62202	0.984197	0.706134	-0.0510797	-141.03	7000000	7050000
OY776061.1	141	1.23405	0.870531	2.07036	1.48543	0.363517	1003.66	7050000	7100000
OY776061.1	142	1.05094	1.16066	0.910827	0.653493	-0.109714	-302.917	7100000	7150000
OY776061.1	143	1.29541	1.32715	0.980575	0.703535	-0.0317335	-87.6152	7150000	7200000
OY776061.1	144	1.5983	1.55748	1.02639	0.736406	0.0408198	112.702	7200000	7250000
OY776061.1	145	1.75059	1.56566	1.24473	0.893058	0.184938	510.609	7250000	7300000
OY776061.1	146	1.38424	1.47812	1.01164	0.725824	-0.0938759	-259.189	7300000	7350000
OY776061.1	147	1.72143	1.72114	1.01269	0.726574	0.000290462	0.801958	7350000	7400000
OY776061.1	148	1.57332	1.39275	1.14713	0.823032	0.18057	498.549	7400000	7450000
OY776061.1	149	1.28089	1.27769	0.976179	0.700381	0.00319528	8.82208	7450000	7500000
OY776061.1	150	1.29814	1.47174	0.89516	0.642252	-0.173598	-479.3	7500000	7550000
OY776061.1	151	0.843921	0.806223	1.37331	0.985308	0.0376979	104.083	7550000	7600000
OY776061.1	152	1.46936	1.2562	1.20628	0.865473	0.213153	588.51	7600000	7650000
OY776061.1	153	1.4171	1.34036	1.10579	0.793375	0.076742	211.882	7650000	7700000
OY776061.1	154	0.916004	0.911945	1.10647	0.793859	0.00405937	11.2078	7700000	7750000
OY776061.1	155	0.231974	0.250411	1.05867	0.759569	-0.018437	-50.9039	7750000	7800000
OY776061.1	156	0.42138	0.714647	0.576263	0.413452	-0.293266	-809.699	7800000	7850000
OY776061.1	157	1.25626	1.35628	0.962806	0.690786	-0.100025	-276.166	7850000	7900000
OY776061.1	158	1.34415	1.5382	0.86365	0.619645	-0.19405	-535.767	7900000	7950000
OY776061.1	159	1.93803	2.01984	0.949939	0.681555	-0.0818112	-225.878	7950000	8000000
OY776061.1	160	1.35537	1.03209	1.3768	0.987815	0.323281	892.57	8000000	8050000
OY776061.1	161	1.07396	1.0142	1.14467	0.821269	0.0597631	165.004	8050000	8100000
OY776061.1	162	0.944548	1.12301	0.8121	0.582659	-0.17846	-492.723	8100000	8150000
OY776061.1	163	0.976136	0.963589	0.971633	0.69712	0.0125464	34.6401	8150000	8200000
OY776061.1	164	1.64447	1.69856	0.969254	0.695412	-0.0540938	-149.351	8200000	8250000
OY776061.1	165	1.58776	1.60229	0.992377	0.712003	-0.0145309	-40.1194	8250000	8300000
OY776061.1	166	1.27446	1.24491	1.03532	0.742816	0.0295458	81.575	8300000	8350000
OY776061.1	167	1.66255	1.67693	0.993362	0.712709	-0.014376	-39.6917	8350000	8400000
OY776061.1	168	1.23137	1.18049	1.10491	0.792741	0.0508842	140.49	8400000	8450000
OY776061.1	169	1.35399	1.41039	0.916492	0.657557	-0.0564004	-155.72	8450000	8500000
OY776061.1	170	0.872957	1.0325	0.774138	0.555422	-0.159545	-440.499	8500000	8550000
OY776061.1	171	1.07613	1.19459	0.826032	0.592655	-0.118457	-327.056	8550000	8600000
OY776061.1	172	2.27668	1.25825	1.91645	1.375	1.01843	2811.84	8600000	8640000
OY776062.1	0	0.81393	0.769665	1.0844	0.778029	0.0442645	122.213	0	50000
OY776062.1	1	0.464701	0.522524	1.04145	0.747211	-0.0578226	-159.646	50000	100000
OY776062.1	2	0.232759	0.221847	1.07926	0.774336	0.0109124	30.1289	100000	150000
OY776062.1	3	0.161538	0.113452	1.6305	1.16984	0.0480867	132.766	150000	200000
OY776062.1	4	0.147664	0.312547	0.714985	0.512982	-0.164882	-455.235	200000	250000
OY776062.1	5	0.799161	1.02968	0.76458	0.548564	-0.230519	-636.457	250000	300000
OY776062.1	6	0.965904	1.12047	0.878587	0.630362	-0.154563	-426.743	300000	350000
OY776062.1	7	0.913674	1.05665	0.862872	0.619086	-0.142973	-394.745	350000	400000
OY776062.1	8	1.13324	1.34564	0.852294	0.611497	-0.212402	-586.435	400000	450000
OY776062.1	9	0.578906	0.694758	0.913254	0.655234	-0.115852	-319.863	450000	500000
OY776062.1	10	1.26803	1.1597	1.11325	0.798725	0.10833	299.096	500000	550000
OY776062.1	11	1.06303	1.31791	0.836044	0.599838	-0.254885	-703.73	550000	600000
OY776062.1	12	1.03917	1.29207	0.75361	0.540694	-0.252907	-698.268	600000	650000
OY776062.1	13	0.40048	0.51938	1.10218	0.790784	-0.1189	-328.281	650000	700000
OY776062.1	14	0.248266	0.138749	4.39736	3.15498	0.109517	302.374	700000	750000
OY776062.1	15	0.564685	0.329696	1.68634	1.2099	0.234988	648.796	750000	800000
OY776062.1	16	1.0483	1.02813	1.04645	0.7508	0.0201672	55.6812	800000	850000
OY776062.1	17	0.35675	0.476514	0.67965	0.48763	-0.119763	-330.663	850000	900000
OY776062.1	18	0.360918	0.260742	1.81959	1.3055	0.100177	276.584	900000	950000
OY776062.1	19	0.235401	0.207662	1.64354	1.17919	0.0277394	76.5876	950000	1000000
OY776062.1	20	0.112618	0.0596914	3.12817	2.24438	0.0529264	146.128	1000000	1050000
OY776062.1	21	0.32274	0.295302	1.32228	0.9487	0.0274384	75.7566	1050000	1100000
OY776062.1	22	0.242101	0.117968	2.68972	1.9298	0.124133	342.727	1100000	1150000
OY776062.1	23	0.550279	0.745325	0.73763	0.529229	-0.195046	-538.517	1150000	1200000
OY776062.1	24	1.51495	1.43803	1.05916	0.759918	0.0769218	212.379	1200000	1250000
OY776062.1	25	1.58648	1.80103	0.907462	0.651078	-0.214542	-592.343	1250000	1300000
OY776062.1	26	1.06151	1.13864	0.812324	0.58282	-0.0771316	-212.958	1300000	1350000
OY776062.1	27	1.18537	1.51268	0.5793	0.415632	-0.327312	-903.7	1350000	1400000
OY776062.1	28	1.66971	1.09098	1.62955	1.16916	0.578726	1597.85	1400000	1450000
OY776062.1	29	1.04	1.02366	1.06012	0.760604	0.0163407	45.1162	1450000	1500000
OY776062.1	30	1.1395	0.877302	1.34416	0.964398	0.262201	723.93	1500000	1550000
OY776062.1	31	0.591876	0.406431	1.57396	1.12927	0.185445	512.008	1550000	1600000
OY776062.1	32	0.456942	0.565482	0.991187	0.711149	-0.10854	-299.675	1600000	1650000
OY776062.1	33	0.44537	1.00529	0.441562	0.316808	-0.559917	-1545.92	1650000	1700000
OY776062.1	34	0.520839	0.987917	0.508343	0.364722	-0.467078	-1289.59	1700000	1750000
OY776062.1	35	0.700864	0.589569	1.37491	0.986461	0.111295	307.283	1750000	1800000
OY776062.1	36	0.656891	0.582628	1.29184	0.926856	0.0742635	205.039	1800000	1850000
OY776062.1	37	0.563049	0.77782	0.750876	0.538733	-0.214771	-592.977	1850000	1900000
OY776062.1	38	0.835611	0.861751	0.97253	0.697763	-0.0261395	-72.1704	1900000	1950000
OY776062.1	39	1.30386	1.43408	0.911135	0.653714	-0.13022	-359.533	1950000	2000000
OY776062.1	40	0.9531	0.759267	1.35983	0.97564	0.193833	535.166	2000000	2050000
OY776062.1	41	1.05711	0.853881	1.81688	1.30356	0.20323	561.111	2050000	2100000
OY776062.1	42	0.4199	0.41914	1.1781	0.845254	0.000759662	2.09741	2100000	2150000
OY776062.1	43	0.845397	0.836249	1.08051	0.775236	0.00914728	25.2554	2150000	2200000
OY776062.1	44	1.2598	1.26091	1.06734	0.765784	-0.00110949	-3.06328	2200000	2250000
OY776062.1	45	1.32675	1.42717	0.934462	0.67045	-0.100423	-277.265	2250000	2300000
OY776062.1	46	0.607814	0.675592	1.0586	0.759516	-0.0677785	-187.134	2300000	2350000
OY776062.1	47	1.41315	1.4023	1.03361	0.741588	0.0108426	29.9361	2350000	2400000
OY776062.1	48	1.16571	1.06242	1.14759	0.823367	0.103287	285.172	2400000	2450000
OY776062.1	49	1.02579	0.931892	2.73089	1.95933	0.0938936	259.237	2450000	2500000
OY776062.1	50	0.783628	0.686046	2.2262	1.59724	0.0975829	269.424	2500000	2550000
OY776062.1	51	0.399092	0.0282429	27.528	19.7506	0.370849	1023.9	2550000	2600000
OY776062.1	52	0.899538	0.203907	16.2872	11.6856	0.69563	1920.61	2600000	2650000
OY776062.1	53	0.875453	0.652697	1.83668	1.31777	0.222756	615.023	2650000	2700000
OY776062.1	54	1.33818	1.14442	1.17244	0.841194	0.193757	534.956	2700000	2750000
OY776062.1	55	1.78388	1.19766	1.49824	1.07494	0.586217	1618.53	2750000	2800000
OY776062.1	56	1.24164	1.15245	1.1059	0.793453	0.0891834	246.233	2800000	2850000
OY776062.1	57	1.60664	1.57849	1.02419	0.734827	0.0281506	77.723	2850000	2900000
OY776062.1	58	1.49006	1.30044	1.24213	0.891195	0.189623	523.544	2900000	2950000
OY776062.1	59	1.03884	1.14262	0.944258	0.677479	-0.103774	-286.517	2950000	3000000
OY776062.1	60	1.79206	1.82989	0.980711	0.703632	-0.037834	-104.459	3000000	3050000
OY776062.1	61	1.36763	1.27882	1.11002	0.79641	0.0888091	245.199	3050000	3100000
OY776062.1	62	1.09481	0.911885	1.71234	1.22855	0.182926	505.052	3100000	3150000
OY776062.1	63	1.26393	1.27836	1.07614	0.7721	-0.0144285	-39.8365	3150000	3200000
OY776062.1	64	1.3476	1.03154	1.56571	1.12336	0.316061	872.634	3200000	3250000
OY776062.1	65	1.54572	1.51699	1.07278	0.769692	0.0287293	79.3208	3250000	3300000
OY776062.1	66	1.84844	2.08204	0.884843	0.63485	-0.233606	-644.98	3300000	3350000
OY776062.1	67	1.50853	1.85158	0.816422	0.58576	-0.343055	-947.164	3350000	3400000
OY776062.1	68	1.79234	1.94319	0.920661	0.660548	-0.150859	-416.517	3400000	3450000
OY776062.1	69	1.3327	1.55962	0.850374	0.610119	-0.226916	-626.508	3450000	3500000
OY776062.1	70	2.05731	1.75088	1.17559	0.843451	0.306425	846.029	3500000	3550000
OY776062.1	71	2.07657	1.75307	1.18822	0.852511	0.323499	893.172	3550000	3600000
OY776062.1	72	1.65547	1.34039	1.25744	0.90218	0.315074	869.911	3600000	3650000
OY776062.1	73	1.43896	1.21218	1.25032	0.89707	0.226782	626.138	3650000	3700000
OY776062.1	74	1.09645	0.899593	1.37293	0.985042	0.196853	543.504	3700000	3750000
OY776062.1	75	1.8814	1.49112	1.29821	0.931428	0.390284	1077.56	3750000	3800000
OY776062.1	76	2.04424	1.8013	1.14102	0.818651	0.242935	670.736	3800000	3850000
OY776062.1	77	1.98833	1.70598	1.18237	0.848317	0.282348	779.556	3850000	3900000
OY776062.1	78	2.03949	1.84869	1.11117	0.797234	0.190802	526.799	3900000	3950000
OY776062.1	79	1.99773	1.73805	1.19801	0.859535	0.259674	716.952	3950000	4000000
OY776062.1	80	1.89177	1.79326	1.05239	0.755062	0.0985068	271.974	4000000	4050000
OY776062.1	81	1.15252	1.37225	0.829881	0.595417	-0.219725	-606.654	4050000	4100000
OY776062.1	82	1.10551	1.35741	0.798711	0.573053	-0.251893	-695.469	4100000	4150000
OY776062.1	83	1.35227	1.53844	0.868279	0.622966	-0.186176	-514.028	4150000	4200000
OY776062.1	84	1.33701	1.21366	1.10275	0.791192	0.123347	340.557	4200000	4250000
OY776062.1	85	0.672414	0.101766	16.3444	11.7266	0.570648	1575.54	4250000	4300000
OY776062.1	86	0.750421	0.067655	22.3202	16.0141	0.682766	1885.1	4300000	4350000
OY776062.1	87	1.08099	0.556732	8.30701	5.96004	0.524257	1447.46	4350000	4400000
OY776062.1	88	2.06975	2.09692	0.989904	0.710229	-0.0271642	-74.9996	4400000	4450000
OY776062.1	89	1.78785	1.77032	1.01949	0.731453	0.0175289	48.3967	4450000	4500000
OY776062.1	90	1.50789	1.57403	0.963484	0.691273	-0.0661344	-182.595	4500000	4550000
OY776062.1	91	1.36868	0.811721	2.34411	1.68183	0.55696	1537.75	4550000	4600000
OY776062.1	92	1.50703	1.61761	0.892124	0.640074	-0.110576	-305.297	4600000	4650000
OY776062.1	93	1.49464	1.40707	1.07424	0.770737	0.0875723	241.785	4650000	4700000
OY776062.1	94	1.15009	0.894156	2.09138	1.50051	0.255931	706.618	4700000	4750000
OY776062.1	95	0.63065	0.446551	3.15742	2.26536	0.184099	508.292	4750000	4800000
OY776062.1	96	0.129308	0.162409	3.10765	2.22965	-0.033101	-91.3908	4800000	4850000
OY776062.1	97	0.150084	0.445593	0.277972	0.199437	-0.295509	-815.893	4850000	4900000
[truncated: 1,992 more rows]

## Sheet: Olob.difCoverage.mismatch.0
chr	range	heterogametic	homogametic	ratio	ratio_scaled	diff	diff_scaled	start	end
[truncated: 1,313 more rows]

[truncated: 3 more sheets: Olob_alternate, Petfic.difCoverage.mismatch.0, Phavent.difCoverage.mismatch.0]
