# Supplementary material for: Sponge genomes reveal a pre-metazoan origin of the sex determination toolkit and sex chromosomes
Source: Research Square preprint supplement (doi:10.21203/rs.3.rs-8554461/v1), 2026-02-12
Supplement: Supplementary file 13 [file 809fead73461d16728d80d50.xlsx]

## Sheet: A_Gene_age_distribution
ALL LOCI
All Loci per species	Species specific	Axinellida_Suberitida	Haposclerida	Chondrillida	Homosclerophorida	Heteroscleromorpha	Demospongiae	Porifera	Metazoa	Opisthokonta	Eukaryota	Cell_organisms	TOTAL Per SPECIES
Axinella damicornis	2159	354	0	0	0	1259	384	187	1518	461	2050	8719	17091
Halichondria panicea	1936	7	0	0	0	1413	318	174	1430	421	2078	8128	15905
Phakellia ventilabrum	2532	462	0	0	0	1442	383	200	1765	511	2312	9330	18937
Petrosia ficiformis	2187	0	428	0	0	1430	540	210	2173	533	2264	11659	21424
Chondrosia reniformis	2540	0	0	47	0	0	790	181	1453	384	1966	8824	16185
Oscarella lobularis	2539	0	0	0	478	0	0	226	1466	382	1986	8133	15210
TOTAL	11354	823	428	47	478	5544	2415	1178	9805	2692	12656	54793	102213
Percentages
All Loci per species	Species specific	Axinellida_Suberitida	Haposclerida	Chondrillida	Homosclerophorida	Heteroscleromorpha	Demospongiae	Porifera	Metazoa	Opisthokonta	Eukaryota	Cell_organisms
Axinella damicornis	2159	43.0134	0	0	0	22.7092	15.9006	15.8744	15.4819	17.1248	16.1979	15.9126
Halichondria panicea	1936	0.850547	0	0	0	25.487	13.1677	14.7708	14.5844	15.6389	16.4191	14.834
Phakellia ventilabrum	2532	56.1361	0	0	0	26.0101	15.8592	16.9779	18.001	18.9822	18.268	17.0277
Petrosia ficiformis	2187	0	100	0	0	25.7937	22.3602	17.8268	22.1622	19.7994	17.8887	21.2783
Chondrosia reniformis	2540	0	0	100	0	0	32.7122	15.365	14.819	14.2645	15.5341	16.1042
Oscarella lobularis	2539	0	0	0	100	0	0	19.1851	14.9516	14.1902	15.6922	14.8431
TOTAL		100	100	100	100	100	100	100	100	100	100	100
SEX LOCI
Numer sex loci	Species_specific	Axinellida_Suberitida	Heteroscleromorpha	Haplosclerida	Chondrillida	Homosclerophorida	Demospongiae	Porifera	Metazoa	Opisthokonta	Eukaryota	Cell_organisms	Possible contamination or HGT	TOTAL
Axinella damicornis	8	3	11	0	0	0	2	0	13	5	20	108	0	170
Halichondria panicea	7	0	8	0	0	0	0	0	0	0	7	38	1	61
Phakellia ventilabrum	25	1	18	0	0	0	6	3	27	7	31	132	6	256
Petrosia ficiformis	73	0	97	28	0	0	23	9	143	35	116	980	3	1507
Chondrosia reniformis	41	0	0	0	2	0	12	1	23	4	34	231	3	351
Oscarella lobularis	25	0	0	0	0	10	0	4	27	7	49	238	0	360
														2705
Proportion sex loci	Species_specific	Axinellida_Suberitida	Heteroscleromorpha	Haplosclerida	Chondrillida	Homosclerophorida	Demospongiae	Porifera	Metazoa	Opisthokonta	Eukaryota	Cell_organisms	Possible contamination or HGT	TOTAL
Axinella damicornis	0.0470588	0.0176471	0.0647059	0	0	0	0.0117647	0	0.0764706	0.0294118	0.117647	0.635294	0	1
Halichondria panicea	0.114754	0	0.131148	0	0	0	0	0	0	0	0.114754	0.622951	0.0163934	1
Phakellia ventilabrum	0.0976562	0.00390625	0.0703125	0	0	0	0.0234375	0.0117188	0.105469	0.0273438	0.121094	0.515625	0.0234375	1
Petrosia ficiformis	0.0484406	0	0.0643663	0.01858	0	0	0.0152621	0.00597213	0.0948905	0.023225	0.0769741	0.650299	0.00199071	1
Chondrosia reniformis	0.116809	0	0	0	0.00569801	0	0.034188	0.002849	0.0655271	0.011396	0.0968661	0.65812	0.00854701	1
Oscarella lobularis	0.0694444	0	0	0	0	0.0277778	0	0.0111111	0.075	0.0194444	0.136111	0.661111	0	1

## Sheet: B_Relative_ALLgenes_age
Species	Gene name	Phylostratum	rank	taxonomic_representativeness
Oscarella lobularis	Osclob_v00_mik.CANNPT010000001.1G10.1	Metazoa	4	66
Oscarella lobularis	Osclob_v00_mik.CANNPT010000001.1G11.1	cellular organisms	1	100
Oscarella lobularis	Osclob_v00_mik.CANNPT010000001.1G12.1	cellular organisms	1	83
Oscarella lobularis	Osclob_v00_mik.CANNPT010000001.1G13.1	Metazoa	4	100
Oscarella lobularis	Osclob_v00_mik.CANNPT010000001.1G14.1	Homosclerophorida	6	100
Oscarella lobularis	Osclob_v00_mik.CANNPT010000001.1G15.1	cellular organisms	1	100
Oscarella lobularis	Osclob_v00_mik.CANNPT010000001.1G2.1	cellular organisms	1	100
Oscarella lobularis	Osclob_v00_mik.CANNPT010000001.1G3.1	Opisthokonta	3	100
Oscarella lobularis	Osclob_v00_mik.CANNPT010000001.1G4.1	Oscarella lobularis	7	100
Oscarella lobularis	Osclob_v00_mik.CANNPT010000001.1G5.1	cellular organisms	1	100
Oscarella lobularis	Osclob_v00_mik.CANNPT010000001.1G6.1	cellular organisms	1	100
Oscarella lobularis	Osclob_v00_mik.CANNPT010000001.1G7.1	Metazoa	4	100
Oscarella lobularis	Osclob_v00_mik.CANNPT010000001.1G8.1	Oscarella lobularis	7	100
Oscarella lobularis	Osclob_v00_mik.CANNPT010000001.1G9.1	Porifera	5	50
Oscarella lobularis	Osclob_v00_mik.OX382150.1G1000.1	Eukaryota	2	80
Oscarella lobularis	Osclob_v00_mik.OX382150.1G100.1	Eukaryota	2	100
Oscarella lobularis	Osclob_v00_mik.OX382150.1G1002.1	cellular organisms	1	83
Oscarella lobularis	Osclob_v00_mik.OX382150.1G1003.1	cellular organisms	1	83
Oscarella lobularis	Osclob_v00_mik.OX382150.1G1004.1	cellular organisms	1	83
Oscarella lobularis	Osclob_v00_mik.OX382150.1G1005.1	cellular organisms	1	83
Oscarella lobularis	Osclob_v00_mik.OX382150.1G1006.1	Oscarella lobularis	7	100
Oscarella lobularis	Osclob_v00_mik.OX382150.1G1009.1	cellular organisms	1	100
Oscarella lobularis	Osclob_v00_mik.OX382150.1G1010.1	Oscarella lobularis	7	100
Oscarella lobularis	Osclob_v00_mik.OX382150.1G1011.1	Oscarella lobularis	7	100
Oscarella lobularis	Osclob_v00_mik.OX382150.1G101.1	cellular organisms	1	100
Oscarella lobularis	Osclob_v00_mik.OX382150.1G1012.1	Oscarella lobularis	7	100
Oscarella lobularis	Osclob_v00_mik.OX382150.1G1013.1	Metazoa	4	66
Oscarella lobularis	Osclob_v00_mik.OX382150.1G1014.1	cellular organisms	1	100
Oscarella lobularis	Osclob_v00_mik.OX382150.1G1015.2	Homosclerophorida	6	100
Oscarella lobularis	Osclob_v00_mik.OX382150.1G1016.1	cellular organisms	1	100
Oscarella lobularis	Osclob_v00_mik.OX382150.1G1017.1	Metazoa	4	66
Oscarella lobularis	Osclob_v00_mik.OX382150.1G1018.1	Oscarella lobularis	7	100
Oscarella lobularis	Osclob_v00_mik.OX382150.1G1019.1	Metazoa	4	66
Oscarella lobularis	Osclob_v00_mik.OX382150.1G10.1	cellular organisms	1	83
Oscarella lobularis	Osclob_v00_mik.OX382150.1G1020.1	Homosclerophorida	6	100
Oscarella lobularis	Osclob_v00_mik.OX382150.1G1021.1	cellular organisms	1	100
Oscarella lobularis	Osclob_v00_mik.OX382150.1G102.1	cellular organisms	1	66
Oscarella lobularis	Osclob_v00_mik.OX382150.1G1022.1	Porifera	5	50
Oscarella lobularis	Osclob_v00_mik.OX382150.1G1023.1	Oscarella lobularis	7	100
Oscarella lobularis	Osclob_v00_mik.OX382150.1G1024.1	Oscarella lobularis	7	100
Oscarella lobularis	Osclob_v00_mik.OX382150.1G1025.1	cellular organisms	1	100
Oscarella lobularis	Osclob_v00_mik.OX382150.1G1026.2	cellular organisms	1	100
Oscarella lobularis	Osclob_v00_mik.OX382150.1G1029.1	Homosclerophorida	6	100
Oscarella lobularis	Osclob_v00_mik.OX382150.1G1031.1	cellular organisms	1	83
Oscarella lobularis	Osclob_v00_mik.OX382150.1G103.1	Eukaryota	2	100
Oscarella lobularis	Osclob_v00_mik.OX382150.1G1032.1	cellular organisms	1	100
Oscarella lobularis	Osclob_v00_mik.OX382150.1G1036.1	Metazoa	4	66
Oscarella lobularis	Osclob_v00_mik.OX382150.1G1038.1	Oscarella lobularis	7	100
Oscarella lobularis	Osclob_v00_mik.OX382150.1G1039.1	Metazoa	4	66
Oscarella lobularis	Osclob_v00_mik.OX382150.1G1040.1	Oscarella lobularis	7	100
Oscarella lobularis	Osclob_v00_mik.OX382150.1G1041.1	Metazoa	4	66
Oscarella lobularis	Osclob_v00_mik.OX382150.1G104.1	Homosclerophorida	6	100
Oscarella lobularis	Osclob_v00_mik.OX382150.1G1042.1	Metazoa	4	66
Oscarella lobularis	Osclob_v00_mik.OX382150.1G1044.1	Homosclerophorida	6	100
Oscarella lobularis	Osclob_v00_mik.OX382150.1G1045.1	Metazoa	4	33
Oscarella lobularis	Osclob_v00_mik.OX382150.1G1046.1	Oscarella lobularis	7	100
Oscarella lobularis	Osclob_v00_mik.OX382150.1G1048.1	Opisthokonta	3	100
Oscarella lobularis	Osclob_v00_mik.OX382150.1G1049.1	cellular organisms	1	100
Oscarella lobularis	Osclob_v00_mik.OX382150.1G1050.1	cellular organisms	1	83
Oscarella lobularis	Osclob_v00_mik.OX382150.1G105.1	cellular organisms	1	100
Oscarella lobularis	Osclob_v00_mik.OX382150.1G1052.1	Porifera	5	100
Oscarella lobularis	Osclob_v00_mik.OX382150.1G1054.1	Oscarella lobularis	7	100
Oscarella lobularis	Osclob_v00_mik.OX382150.1G1055.1	Oscarella lobularis	7	100
Oscarella lobularis	Osclob_v00_mik.OX382150.1G1056.1	Porifera	5	50
Oscarella lobularis	Osclob_v00_mik.OX382150.1G1057.1	Oscarella lobularis	7	100
Oscarella lobularis	Osclob_v00_mik.OX382150.1G1058.1	Oscarella lobularis	7	100
Oscarella lobularis	Osclob_v00_mik.OX382150.1G1059.1	Oscarella lobularis	7	100
Oscarella lobularis	Osclob_v00_mik.OX382150.1G1060.1	Oscarella lobularis	7	100
Oscarella lobularis	Osclob_v00_mik.OX382150.1G1061.1	Oscarella lobularis	7	100
Oscarella lobularis	Osclob_v00_mik.OX382150.1G106.1	Eukaryota	2	60
Oscarella lobularis	Osclob_v00_mik.OX382150.1G1063.1	Oscarella lobularis	7	100
Oscarella lobularis	Osclob_v00_mik.OX382150.1G1064.1	Oscarella lobularis	7	100
Oscarella lobularis	Osclob_v00_mik.OX382150.1G1065.1	Oscarella lobularis	7	100
Oscarella lobularis	Osclob_v00_mik.OX382150.1G1066.1	Oscarella lobularis	7	100
Oscarella lobularis	Osclob_v00_mik.OX382150.1G1067.1	Oscarella lobularis	7	100
Oscarella lobularis	Osclob_v00_mik.OX382150.1G1068.1	Oscarella lobularis	7	100
Oscarella lobularis	Osclob_v00_mik.OX382150.1G1069.1	Homosclerophorida	6	100
Oscarella lobularis	Osclob_v00_mik.OX382150.1G1070.1	Oscarella lobularis	7	100
Oscarella lobularis	Osclob_v00_mik.OX382150.1G107.1	Eukaryota	2	80
Oscarella lobularis	Osclob_v00_mik.OX382150.1G1073.2	Oscarella lobularis	7	100
Oscarella lobularis	Osclob_v00_mik.OX382150.1G1075.1	Oscarella lobularis	7	100
Oscarella lobularis	Osclob_v00_mik.OX382150.1G1076.1	Oscarella lobularis	7	100
Oscarella lobularis	Osclob_v00_mik.OX382150.1G1077.1	Homosclerophorida	6	100
Oscarella lobularis	Osclob_v00_mik.OX382150.1G1078.1	Oscarella lobularis	7	100
Oscarella lobularis	Osclob_v00_mik.OX382150.1G1080.1	Oscarella lobularis	7	100
Oscarella lobularis	Osclob_v00_mik.OX382150.1G1081.1	Oscarella lobularis	7	100
Oscarella lobularis	Osclob_v00_mik.OX382150.1G108.1	cellular organisms	1	100
Oscarella lobularis	Osclob_v00_mik.OX382150.1G1082.1	Oscarella lobularis	7	100
Oscarella lobularis	Osclob_v00_mik.OX382150.1G1083.1	Oscarella lobularis	7	100
Oscarella lobularis	Osclob_v00_mik.OX382150.1G1085.1	Oscarella lobularis	7	100
Oscarella lobularis	Osclob_v00_mik.OX382150.1G1086.1	Oscarella lobularis	7	100
Oscarella lobularis	Osclob_v00_mik.OX382150.1G1087.1	Oscarella lobularis	7	100
Oscarella lobularis	Osclob_v00_mik.OX382150.1G1088.1	Oscarella lobularis	7	100
Oscarella lobularis	Osclob_v00_mik.OX382150.1G1089.1	Oscarella lobularis	7	100
Oscarella lobularis	Osclob_v00_mik.OX382150.1G1090.1	Oscarella lobularis	7	100
Oscarella lobularis	Osclob_v00_mik.OX382150.1G1091.1	Oscarella lobularis	7	100
Oscarella lobularis	Osclob_v00_mik.OX382150.1G109.1	Eukaryota	2	100
Oscarella lobularis	Osclob_v00_mik.OX382150.1G1092.1	Oscarella lobularis	7	100
Oscarella lobularis	Osclob_v00_mik.OX382150.1G1093.1	Oscarella lobularis	7	100
Oscarella lobularis	Osclob_v00_mik.OX382150.1G1094.1	Oscarella lobularis	7	100
Oscarella lobularis	Osclob_v00_mik.OX382150.1G1096.1	Oscarella lobularis	7	100
Oscarella lobularis	Osclob_v00_mik.OX382150.1G1097.1	Oscarella lobularis	7	100
Oscarella lobularis	Osclob_v00_mik.OX382150.1G1098.1	cellular organisms	1	83
Oscarella lobularis	Osclob_v00_mik.OX382150.1G1099.1	Oscarella lobularis	7	100
Oscarella lobularis	Osclob_v00_mik.OX382150.1G1100.1	Oscarella lobularis	7	100
Oscarella lobularis	Osclob_v00_mik.OX382150.1G1101.1	Oscarella lobularis	7	100
Oscarella lobularis	Osclob_v00_mik.OX382150.1G110.1	Metazoa	4	100
Oscarella lobularis	Osclob_v00_mik.OX382150.1G1102.1	cellular organisms	1	100
Oscarella lobularis	Osclob_v00_mik.OX382150.1G1103.1	Oscarella lobularis	7	100
Oscarella lobularis	Osclob_v00_mik.OX382150.1G1106.1	Homosclerophorida	6	100
Oscarella lobularis	Osclob_v00_mik.OX382150.1G1107.1	Oscarella lobularis	7	100
Oscarella lobularis	Osclob_v00_mik.OX382150.1G1108.1	Homosclerophorida	6	100
Oscarella lobularis	Osclob_v00_mik.OX382150.1G1109.1	Oscarella lobularis	7	100
Oscarella lobularis	Osclob_v00_mik.OX382150.1G1110.1	Oscarella lobularis	7	100
Oscarella lobularis	Osclob_v00_mik.OX382150.1G1111.1	Oscarella lobularis	7	100
Oscarella lobularis	Osclob_v00_mik.OX382150.1G111.1	Opisthokonta	3	100
Oscarella lobularis	Osclob_v00_mik.OX382150.1G1112.1	Oscarella lobularis	7	100
Oscarella lobularis	Osclob_v00_mik.OX382150.1G1113.1	Oscarella lobularis	7	100
Oscarella lobularis	Osclob_v00_mik.OX382150.1G1114.1	Oscarella lobularis	7	100
Oscarella lobularis	Osclob_v00_mik.OX382150.1G1115.1	Oscarella lobularis	7	100
Oscarella lobularis	Osclob_v00_mik.OX382150.1G1116.1	Oscarella lobularis	7	100
Oscarella lobularis	Osclob_v00_mik.OX382150.1G1117.1	Oscarella lobularis	7	100
Oscarella lobularis	Osclob_v00_mik.OX382150.1G11.1	Eukaryota	2	100
Oscarella lobularis	Osclob_v00_mik.OX382150.1G1120.1	Oscarella lobularis	7	100
Oscarella lobularis	Osclob_v00_mik.OX382150.1G1121.1	Oscarella lobularis	7	100
Oscarella lobularis	Osclob_v00_mik.OX382150.1G112.1	cellular organisms	1	100
Oscarella lobularis	Osclob_v00_mik.OX382150.1G1122.3	Oscarella lobularis	7	100
Oscarella lobularis	Osclob_v00_mik.OX382150.1G1123.1	Oscarella lobularis	7	100
Oscarella lobularis	Osclob_v00_mik.OX382150.1G1124.1	Oscarella lobularis	7	100
Oscarella lobularis	Osclob_v00_mik.OX382150.1G1125.1	Oscarella lobularis	7	100
Oscarella lobularis	Osclob_v00_mik.OX382150.1G1126.1	cellular organisms	1	100
Oscarella lobularis	Osclob_v00_mik.OX382150.1G1127.2	Eukaryota	2	100
Oscarella lobularis	Osclob_v00_mik.OX382150.1G1128.1	cellular organisms	1	100
Oscarella lobularis	Osclob_v00_mik.OX382150.1G1129.1	Oscarella lobularis	7	100
Oscarella lobularis	Osclob_v00_mik.OX382150.1G1130.1	cellular organisms	1	100
Oscarella lobularis	Osclob_v00_mik.OX382150.1G1131.1	cellular organisms	1	33
Oscarella lobularis	Osclob_v00_mik.OX382150.1G113.1	Oscarella lobularis	7	100
Oscarella lobularis	Osclob_v00_mik.OX382150.1G1132.1	Oscarella lobularis	7	100
Oscarella lobularis	Osclob_v00_mik.OX382150.1G1133.1	Possible contamination or HGT	NA	16
Oscarella lobularis	Osclob_v00_mik.OX382150.1G1134.1	Oscarella lobularis	7	100
Oscarella lobularis	Osclob_v00_mik.OX382150.1G1135.1	cellular organisms	1	33
Oscarella lobularis	Osclob_v00_mik.OX382150.1G1136.1	cellular organisms	1	33
Oscarella lobularis	Osclob_v00_mik.OX382150.1G1137.2	cellular organisms	1	50
Oscarella lobularis	Osclob_v00_mik.OX382150.1G1138.1	cellular organisms	1	66
Oscarella lobularis	Osclob_v00_mik.OX382150.1G1139.1	Oscarella lobularis	7	100
Oscarella lobularis	Osclob_v00_mik.OX382150.1G1140.1	cellular organisms	1	33
Oscarella lobularis	Osclob_v00_mik.OX382150.1G1141.1	cellular organisms	1	50
Oscarella lobularis	Osclob_v00_mik.OX382150.1G114.1	Oscarella lobularis	7	100
Oscarella lobularis	Osclob_v00_mik.OX382150.1G1142.1	Oscarella lobularis	7	100
Oscarella lobularis	Osclob_v00_mik.OX382150.1G1143.1	cellular organisms	1	66
Oscarella lobularis	Osclob_v00_mik.OX382150.1G1144.1	cellular organisms	1	50
Oscarella lobularis	Osclob_v00_mik.OX382150.1G1145.1	Oscarella lobularis	7	100
Oscarella lobularis	Osclob_v00_mik.OX382150.1G1146.2	cellular organisms	1	50
Oscarella lobularis	Osclob_v00_mik.OX382150.1G1148.1	Oscarella lobularis	7	100
Oscarella lobularis	Osclob_v00_mik.OX382150.1G1149.1	cellular organisms	1	83
Oscarella lobularis	Osclob_v00_mik.OX382150.1G1150.1	Oscarella lobularis	7	100
Oscarella lobularis	Osclob_v00_mik.OX382150.1G1151.1	cellular organisms	1	66
Oscarella lobularis	Osclob_v00_mik.OX382150.1G115.1	Eukaryota	2	60
Oscarella lobularis	Osclob_v00_mik.OX382150.1G1152.1	Oscarella lobularis	7	100
Oscarella lobularis	Osclob_v00_mik.OX382150.1G1153.1	cellular organisms	1	66
Oscarella lobularis	Osclob_v00_mik.OX382150.1G1154.1	Oscarella lobularis	7	100
Oscarella lobularis	Osclob_v00_mik.OX382150.1G1155.1	Oscarella lobularis	7	100
Oscarella lobularis	Osclob_v00_mik.OX382150.1G1156.1	Oscarella lobularis	7	100
Oscarella lobularis	Osclob_v00_mik.OX382150.1G1157.1	Oscarella lobularis	7	100
Oscarella lobularis	Osclob_v00_mik.OX382150.1G1158.1	cellular organisms	1	50
Oscarella lobularis	Osclob_v00_mik.OX382150.1G1159.1	cellular organisms	1	50
Oscarella lobularis	Osclob_v00_mik.OX382150.1G1160.1	Oscarella lobularis	7	100
Oscarella lobularis	Osclob_v00_mik.OX382150.1G1161.1	Metazoa	4	66
Oscarella lobularis	Osclob_v00_mik.OX382150.1G116.1	Eukaryota	2	100
Oscarella lobularis	Osclob_v00_mik.OX382150.1G1162.1	Oscarella lobularis	7	100
Oscarella lobularis	Osclob_v00_mik.OX382150.1G1163.1	cellular organisms	1	83
Oscarella lobularis	Osclob_v00_mik.OX382150.1G1164.1	Homosclerophorida	6	100
Oscarella lobularis	Osclob_v00_mik.OX382150.1G1165.1	Oscarella lobularis	7	100
Oscarella lobularis	Osclob_v00_mik.OX382150.1G1166.1	Oscarella lobularis	7	100
Oscarella lobularis	Osclob_v00_mik.OX382150.1G1167.1	cellular organisms	1	50
Oscarella lobularis	Osclob_v00_mik.OX382150.1G1168.2	Homosclerophorida	6	100
Oscarella lobularis	Osclob_v00_mik.OX382150.1G1170.1	Oscarella lobularis	7	100
Oscarella lobularis	Osclob_v00_mik.OX382150.1G1171.1	Eukaryota	2	100
Oscarella lobularis	Osclob_v00_mik.OX382150.1G117.1	Metazoa	4	100
Oscarella lobularis	Osclob_v00_mik.OX382150.1G1172.1	cellular organisms	1	66
Oscarella lobularis	Osclob_v00_mik.OX382150.1G1173.2	Porifera	5	100
Oscarella lobularis	Osclob_v00_mik.OX382150.1G1174.1	cellular organisms	1	100
Oscarella lobularis	Osclob_v00_mik.OX382150.1G1175.1	cellular organisms	1	66
Oscarella lobularis	Osclob_v00_mik.OX382150.1G1176.1	cellular organisms	1	83
Oscarella lobularis	Osclob_v00_mik.OX382150.1G1177.1	cellular organisms	1	100
Oscarella lobularis	Osclob_v00_mik.OX382150.1G1178.1	Oscarella lobularis	7	100
Oscarella lobularis	Osclob_v00_mik.OX382150.1G1179.1	cellular organisms	1	66
Oscarella lobularis	Osclob_v00_mik.OX382150.1G1180.1	Eukaryota	2	100
Oscarella lobularis	Osclob_v00_mik.OX382150.1G1181.1	cellular organisms	1	66
Oscarella lobularis	Osclob_v00_mik.OX382150.1G118.1	Metazoa	4	100
Oscarella lobularis	Osclob_v00_mik.OX382150.1G1182.1	cellular organisms	1	83
Oscarella lobularis	Osclob_v00_mik.OX382150.1G1183.1	Oscarella lobularis	7	100
Oscarella lobularis	Osclob_v00_mik.OX382150.1G1184.1	cellular organisms	1	100
Oscarella lobularis	Osclob_v00_mik.OX382150.1G1185.1	cellular organisms	1	100
Oscarella lobularis	Osclob_v00_mik.OX382150.1G1186.1	cellular organisms	1	83
Oscarella lobularis	Osclob_v00_mik.OX382150.1G1187.1	Oscarella lobularis	7	100
Oscarella lobularis	Osclob_v00_mik.OX382150.1G1188.1	Metazoa	4	100
Oscarella lobularis	Osclob_v00_mik.OX382150.1G1189.1	cellular organisms	1	83
Oscarella lobularis	Osclob_v00_mik.OX382150.1G1190.1	cellular organisms	1	100
Oscarella lobularis	Osclob_v00_mik.OX382150.1G1191.1	Oscarella lobularis	7	100
Oscarella lobularis	Osclob_v00_mik.OX382150.1G119.1	cellular organisms	1	100
Oscarella lobularis	Osclob_v00_mik.OX382150.1G1192.1	cellular organisms	1	100
Oscarella lobularis	Osclob_v00_mik.OX382150.1G1193.1	Oscarella lobularis	7	100
Oscarella lobularis	Osclob_v00_mik.OX382150.1G1194.1	cellular organisms	1	83
Oscarella lobularis	Osclob_v00_mik.OX382150.1G1195.1	Oscarella lobularis	7	100
Oscarella lobularis	Osclob_v00_mik.OX382150.1G1196.1	Oscarella lobularis	7	100
Oscarella lobularis	Osclob_v00_mik.OX382150.1G1197.1	Homosclerophorida	6	100
Oscarella lobularis	Osclob_v00_mik.OX382150.1G1198.1	cellular organisms	1	100
Oscarella lobularis	Osclob_v00_mik.OX382150.1G1199.1	Metazoa	4	100
Oscarella lobularis	Osclob_v00_mik.OX382150.1G1.1	Oscarella lobularis	7	100
Oscarella lobularis	Osclob_v00_mik.OX382150.1G1200.1	Metazoa	4	100
Oscarella lobularis	Osclob_v00_mik.OX382150.1G1201.1	Metazoa	4	100
Oscarella lobularis	Osclob_v00_mik.OX382150.1G120.1	cellular organisms	1	100
Oscarella lobularis	Osclob_v00_mik.OX382150.1G1202.1	Metazoa	4	100
Oscarella lobularis	Osclob_v00_mik.OX382150.1G1203.1	Homosclerophorida	6	100
Oscarella lobularis	Osclob_v00_mik.OX382150.1G1204.1	cellular organisms	1	100
Oscarella lobularis	Osclob_v00_mik.OX382150.1G1205.1	cellular organisms	1	100
Oscarella lobularis	Osclob_v00_mik.OX382150.1G1206.1	Homosclerophorida	6	100
Oscarella lobularis	Osclob_v00_mik.OX382150.1G1207.1	cellular organisms	1	100
Oscarella lobularis	Osclob_v00_mik.OX382150.1G1208.1	Absent from the DIAMOND/MMseqs2 results	NA	NA
Oscarella lobularis	Osclob_v00_mik.OX382150.1G1209.1	Eukaryota	2	100
Oscarella lobularis	Osclob_v00_mik.OX382150.1G1210.1	Metazoa	4	33
Oscarella lobularis	Osclob_v00_mik.OX382150.1G1211.1	Metazoa	4	100
Oscarella lobularis	Osclob_v00_mik.OX382150.1G121.1	Metazoa	4	100
Oscarella lobularis	Osclob_v00_mik.OX382150.1G1212.1	Metazoa	4	100
Oscarella lobularis	Osclob_v00_mik.OX382150.1G1213.1	Oscarella lobularis	7	100
Oscarella lobularis	Osclob_v00_mik.OX382150.1G1214.1	Metazoa	4	100
Oscarella lobularis	Osclob_v00_mik.OX382150.1G1215.1	Porifera	5	100
Oscarella lobularis	Osclob_v00_mik.OX382150.1G1216.1	Eukaryota	2	100
Oscarella lobularis	Osclob_v00_mik.OX382150.1G1217.1	Metazoa	4	66
Oscarella lobularis	Osclob_v00_mik.OX382150.1G1218.1	Eukaryota	2	100
Oscarella lobularis	Osclob_v00_mik.OX382150.1G1219.1	Oscarella lobularis	7	100
Oscarella lobularis	Osclob_v00_mik.OX382150.1G12.1	Eukaryota	2	100
Oscarella lobularis	Osclob_v00_mik.OX382150.1G1220.1	Homosclerophorida	6	100
Oscarella lobularis	Osclob_v00_mik.OX382150.1G1221.1	Oscarella lobularis	7	100
Oscarella lobularis	Osclob_v00_mik.OX382150.1G122.1	Eukaryota	2	100
Oscarella lobularis	Osclob_v00_mik.OX382150.1G1222.1	Oscarella lobularis	7	100
Oscarella lobularis	Osclob_v00_mik.OX382150.1G1224.1	Metazoa	4	100
Oscarella lobularis	Osclob_v00_mik.OX382150.1G1225.1	Metazoa	4	100
Oscarella lobularis	Osclob_v00_mik.OX382150.1G1226.1	Metazoa	4	100
Oscarella lobularis	Osclob_v00_mik.OX382150.1G1228.1	cellular organisms	1	100
Oscarella lobularis	Osclob_v00_mik.OX382150.1G1229.1	cellular organisms	1	100
Oscarella lobularis	Osclob_v00_mik.OX382150.1G1230.1	cellular organisms	1	100
Oscarella lobularis	Osclob_v00_mik.OX382150.1G1231.1	cellular organisms	1	83
Oscarella lobularis	Osclob_v00_mik.OX382150.1G123.1	Metazoa	4	100
Oscarella lobularis	Osclob_v00_mik.OX382150.1G1232.1	cellular organisms	1	83
Oscarella lobularis	Osclob_v00_mik.OX382150.1G1233.1	Eukaryota	2	100
Oscarella lobularis	Osclob_v00_mik.OX382150.1G1234.1	cellular organisms	1	83
Oscarella lobularis	Osclob_v00_mik.OX382150.1G1235.1	cellular organisms	1	100
Oscarella lobularis	Osclob_v00_mik.OX382150.1G1236.1	cellular organisms	1	100
Oscarella lobularis	Osclob_v00_mik.OX382150.1G1237.1	Oscarella lobularis	7	100
Oscarella lobularis	Osclob_v00_mik.OX382150.1G1238.1	cellular organisms	1	66
Oscarella lobularis	Osclob_v00_mik.OX382150.1G1239.1	Metazoa	4	33
Oscarella lobularis	Osclob_v00_mik.OX382150.1G1240.1	cellular organisms	1	83
Oscarella lobularis	Osclob_v00_mik.OX382150.1G1241.1	cellular organisms	1	83
Oscarella lobularis	Osclob_v00_mik.OX382150.1G124.1	cellular organisms	1	100
Oscarella lobularis	Osclob_v00_mik.OX382150.1G1242.1	Metazoa	4	100
Oscarella lobularis	Osclob_v00_mik.OX382150.1G1243.1	Metazoa	4	66
Oscarella lobularis	Osclob_v00_mik.OX382150.1G1245.2	cellular organisms	1	83
Oscarella lobularis	Osclob_v00_mik.OX382150.1G1246.1	cellular organisms	1	100
Oscarella lobularis	Osclob_v00_mik.OX382150.1G1247.1	Metazoa	4	33
Oscarella lobularis	Osclob_v00_mik.OX382150.1G1248.1	Metazoa	4	33
Oscarella lobularis	Osclob_v00_mik.OX382150.1G1249.1	cellular organisms	1	100
Oscarella lobularis	Osclob_v00_mik.OX382150.1G1250.1	Oscarella lobularis	7	100
Oscarella lobularis	Osclob_v00_mik.OX382150.1G1251.1	Metazoa	4	33
Oscarella lobularis	Osclob_v00_mik.OX382150.1G125.1	Eukaryota	2	100
Oscarella lobularis	Osclob_v00_mik.OX382150.1G1252.1	cellular organisms	1	100
Oscarella lobularis	Osclob_v00_mik.OX382150.1G1253.1	cellular organisms	1	83
Oscarella lobularis	Osclob_v00_mik.OX382150.1G1254.1	Porifera	5	50
Oscarella lobularis	Osclob_v00_mik.OX382150.1G1255.1	Oscarella lobularis	7	100
Oscarella lobularis	Osclob_v00_mik.OX382150.1G1256.1	Oscarella lobularis	7	100
Oscarella lobularis	Osclob_v00_mik.OX382150.1G1257.1	Oscarella lobularis	7	100
Oscarella lobularis	Osclob_v00_mik.OX382150.1G1258.1	Oscarella lobularis	7	100
Oscarella lobularis	Osclob_v00_mik.OX382150.1G1259.1	Homosclerophorida	6	100
Oscarella lobularis	Osclob_v00_mik.OX382150.1G1260.1	Metazoa	4	66
Oscarella lobularis	Osclob_v00_mik.OX382150.1G1261.1	cellular organisms	1	66
Oscarella lobularis	Osclob_v00_mik.OX382150.1G126.1	Metazoa	4	100
Oscarella lobularis	Osclob_v00_mik.OX382150.1G1262.1	Oscarella lobularis	7	100
Oscarella lobularis	Osclob_v00_mik.OX382150.1G1263.1	Oscarella lobularis	7	100
Oscarella lobularis	Osclob_v00_mik.OX382150.1G1264.2	Oscarella lobularis	7	100
Oscarella lobularis	Osclob_v00_mik.OX382150.1G1265.1	cellular organisms	1	100
Oscarella lobularis	Osclob_v00_mik.OX382150.1G1266.1	Oscarella lobularis	7	100
Oscarella lobularis	Osclob_v00_mik.OX382150.1G1267.1	Metazoa	4	66
Oscarella lobularis	Osclob_v00_mik.OX382150.1G1268.1	Oscarella lobularis	7	100
Oscarella lobularis	Osclob_v00_mik.OX382150.1G1269.1	Metazoa	4	33
Oscarella lobularis	Osclob_v00_mik.OX382150.1G1270.1	Oscarella lobularis	7	100
Oscarella lobularis	Osclob_v00_mik.OX382150.1G1271.1	Metazoa	4	33
Oscarella lobularis	Osclob_v00_mik.OX382150.1G127.1	Opisthokonta	3	100
Oscarella lobularis	Osclob_v00_mik.OX382150.1G1273.1	cellular organisms	1	83
Oscarella lobularis	Osclob_v00_mik.OX382150.1G1274.1	Homosclerophorida	6	100
Oscarella lobularis	Osclob_v00_mik.OX382150.1G1276.1	Oscarella lobularis	7	100
Oscarella lobularis	Osclob_v00_mik.OX382150.1G1277.1	Metazoa	4	100
Oscarella lobularis	Osclob_v00_mik.OX382150.1G1278.1	Oscarella lobularis	7	100
Oscarella lobularis	Osclob_v00_mik.OX382150.1G1279.1	Oscarella lobularis	7	100
Oscarella lobularis	Osclob_v00_mik.OX382150.1G1280.1	Oscarella lobularis	7	100
Oscarella lobularis	Osclob_v00_mik.OX382150.1G1281.1	Metazoa	4	33
Oscarella lobularis	Osclob_v00_mik.OX382150.1G128.1	cellular organisms	1	83
Oscarella lobularis	Osclob_v00_mik.OX382150.1G1282.1	Oscarella lobularis	7	100
Oscarella lobularis	Osclob_v00_mik.OX382150.1G1283.1	Oscarella lobularis	7	100
Oscarella lobularis	Osclob_v00_mik.OX382150.1G1284.1	Oscarella lobularis	7	100
Oscarella lobularis	Osclob_v00_mik.OX382150.1G1285.1	Metazoa	4	100
Oscarella lobularis	Osclob_v00_mik.OX382150.1G1286.1	Metazoa	4	33
Oscarella lobularis	Osclob_v00_mik.OX382150.1G1287.1	cellular organisms	1	66
Oscarella lobularis	Osclob_v00_mik.OX382150.1G1288.1	Metazoa	4	66
Oscarella lobularis	Osclob_v00_mik.OX382150.1G1289.1	Oscarella lobularis	7	100
Oscarella lobularis	Osclob_v00_mik.OX382150.1G1290.1	Oscarella lobularis	7	100
Oscarella lobularis	Osclob_v00_mik.OX382150.1G129.1	Metazoa	4	100
Oscarella lobularis	Osclob_v00_mik.OX382150.1G1292.1	Metazoa	4	66
Oscarella lobularis	Osclob_v00_mik.OX382150.1G1293.1	Metazoa	4	33
Oscarella lobularis	Osclob_v00_mik.OX382150.1G1294.1	Metazoa	4	100
Oscarella lobularis	Osclob_v00_mik.OX382150.1G1295.1	Metazoa	4	66
Oscarella lobularis	Osclob_v00_mik.OX382150.1G1296.1	Metazoa	4	100
Oscarella lobularis	Osclob_v00_mik.OX382150.1G1297.1	cellular organisms	1	100
Oscarella lobularis	Osclob_v00_mik.OX382150.1G1298.1	cellular organisms	1	100
Oscarella lobularis	Osclob_v00_mik.OX382150.1G1300.1	Metazoa	4	100
Oscarella lobularis	Osclob_v00_mik.OX382150.1G1301.1	Metazoa	4	100
Oscarella lobularis	Osclob_v00_mik.OX382150.1G130.1	Eukaryota	2	100
Oscarella lobularis	Osclob_v00_mik.OX382150.1G1303.1	Opisthokonta	3	50
Oscarella lobularis	Osclob_v00_mik.OX382150.1G1304.1	cellular organisms	1	100
Oscarella lobularis	Osclob_v00_mik.OX382150.1G1305.1	Metazoa	4	100
Oscarella lobularis	Osclob_v00_mik.OX382150.1G1306.1	Oscarella lobularis	7	100
Oscarella lobularis	Osclob_v00_mik.OX382150.1G1307.1	cellular organisms	1	83
Oscarella lobularis	Osclob_v00_mik.OX382150.1G1308.1	Porifera	5	100
Oscarella lobularis	Osclob_v00_mik.OX382150.1G1309.1	cellular organisms	1	66
Oscarella lobularis	Osclob_v00_mik.OX382150.1G1310.1	cellular organisms	1	100
Oscarella lobularis	Osclob_v00_mik.OX382150.1G1311.1	Metazoa	4	100
Oscarella lobularis	Osclob_v00_mik.OX382150.1G131.1	cellular organisms	1	66
Oscarella lobularis	Osclob_v00_mik.OX382150.1G1312.1	cellular organisms	1	100
Oscarella lobularis	Osclob_v00_mik.OX382150.1G1313.1	Homosclerophorida	6	100
Oscarella lobularis	Osclob_v00_mik.OX382150.1G1314.1	Homosclerophorida	6	100
Oscarella lobularis	Osclob_v00_mik.OX382150.1G1315.1	Oscarella lobularis	7	100
Oscarella lobularis	Osclob_v00_mik.OX382150.1G1316.1	cellular organisms	1	100
Oscarella lobularis	Osclob_v00_mik.OX382150.1G1317.1	cellular organisms	1	100
Oscarella lobularis	Osclob_v00_mik.OX382150.1G1318.1	cellular organisms	1	100
Oscarella lobularis	Osclob_v00_mik.OX382150.1G1319.1	Homosclerophorida	6	100
Oscarella lobularis	Osclob_v00_mik.OX382150.1G13.1	cellular organisms	1	100
Oscarella lobularis	Osclob_v00_mik.OX382150.1G1320.1	Metazoa	4	100
Oscarella lobularis	Osclob_v00_mik.OX382150.1G1321.1	cellular organisms	1	100
Oscarella lobularis	Osclob_v00_mik.OX382150.1G132.1	cellular organisms	1	100
Oscarella lobularis	Osclob_v00_mik.OX382150.1G1322.1	Oscarella lobularis	7	100
Oscarella lobularis	Osclob_v00_mik.OX382150.1G1323.1	Metazoa	4	66
Oscarella lobularis	Osclob_v00_mik.OX382150.1G1324.1	cellular organisms	1	100
Oscarella lobularis	Osclob_v00_mik.OX382150.1G1325.1	Homosclerophorida	6	100
Oscarella lobularis	Osclob_v00_mik.OX382150.1G1326.1	Metazoa	4	66
Oscarella lobularis	Osclob_v00_mik.OX382150.1G1327.2	cellular organisms	1	100
Oscarella lobularis	Osclob_v00_mik.OX382150.1G1328.1	cellular organisms	1	100
Oscarella lobularis	Osclob_v00_mik.OX382150.1G1329.1	Metazoa	4	100
Oscarella lobularis	Osclob_v00_mik.OX382150.1G1331.1	cellular organisms	1	100
Oscarella lobularis	Osclob_v00_mik.OX382150.1G133.1	cellular organisms	1	100
Oscarella lobularis	Osclob_v00_mik.OX382150.1G1332.1	cellular organisms	1	100
Oscarella lobularis	Osclob_v00_mik.OX382150.1G1333.1	Metazoa	4	66
Oscarella lobularis	Osclob_v00_mik.OX382150.1G1335.1	Metazoa	4	66
Oscarella lobularis	Osclob_v00_mik.OX382150.1G1336.1	Oscarella lobularis	7	100
Oscarella lobularis	Osclob_v00_mik.OX382150.1G1337.1	Oscarella lobularis	7	100
Oscarella lobularis	Osclob_v00_mik.OX382150.1G1338.1	Oscarella lobularis	7	100
Oscarella lobularis	Osclob_v00_mik.OX382150.1G1339.2	Oscarella lobularis	7	100
Oscarella lobularis	Osclob_v00_mik.OX382150.1G1340.1	cellular organisms	1	100
Oscarella lobularis	Osclob_v00_mik.OX382150.1G1341.1	cellular organisms	1	100
Oscarella lobularis	Osclob_v00_mik.OX382150.1G134.1	cellular organisms	1	100
Oscarella lobularis	Osclob_v00_mik.OX382150.1G1343.1	Oscarella lobularis	7	100
Oscarella lobularis	Osclob_v00_mik.OX382150.1G1344.1	Oscarella lobularis	7	100
Oscarella lobularis	Osclob_v00_mik.OX382150.1G1345.1	Oscarella lobularis	7	100
Oscarella lobularis	Osclob_v00_mik.OX382150.1G1346.1	Metazoa	4	100
Oscarella lobularis	Osclob_v00_mik.OX382150.1G1347.1	Metazoa	4	100
Oscarella lobularis	Osclob_v00_mik.OX382150.1G1348.1	Oscarella lobularis	7	100
Oscarella lobularis	Osclob_v00_mik.OX382150.1G1349.1	cellular organisms	1	83
Oscarella lobularis	Osclob_v00_mik.OX382150.1G1350.1	Oscarella lobularis	7	100
Oscarella lobularis	Osclob_v00_mik.OX382150.1G1351.1	Metazoa	4	66
Oscarella lobularis	Osclob_v00_mik.OX382150.1G1352.1	cellular organisms	1	100
Oscarella lobularis	Osclob_v00_mik.OX382150.1G1353.1	Oscarella lobularis	7	100
Oscarella lobularis	Osclob_v00_mik.OX382150.1G1354.1	cellular organisms	1	66
Oscarella lobularis	Osclob_v00_mik.OX382150.1G1355.1	cellular organisms	1	83
Oscarella lobularis	Osclob_v00_mik.OX382150.1G1357.2	cellular organisms	1	66
Oscarella lobularis	Osclob_v00_mik.OX382150.1G1358.1	Homosclerophorida	6	100
Oscarella lobularis	Osclob_v00_mik.OX382150.1G1359.1	Oscarella lobularis	7	100
Oscarella lobularis	Osclob_v00_mik.OX382150.1G1360.1	cellular organisms	1	66
Oscarella lobularis	Osclob_v00_mik.OX382150.1G1361.1	cellular organisms	1	100
Oscarella lobularis	Osclob_v00_mik.OX382150.1G136.1	cellular organisms	1	100
Oscarella lobularis	Osclob_v00_mik.OX382150.1G1363.1	Homosclerophorida	6	100
Oscarella lobularis	Osclob_v00_mik.OX382150.1G1364.1	Metazoa	4	66
Oscarella lobularis	Osclob_v00_mik.OX382150.1G1365.1	Opisthokonta	3	100
Oscarella lobularis	Osclob_v00_mik.OX382150.1G1366.1	cellular organisms	1	66
Oscarella lobularis	Osclob_v00_mik.OX382150.1G1367.1	cellular organisms	1	100
Oscarella lobularis	Osclob_v00_mik.OX382150.1G1368.1	Metazoa	4	66
Oscarella lobularis	Osclob_v00_mik.OX382150.1G1369.2	Homosclerophorida	6	100
Oscarella lobularis	Osclob_v00_mik.OX382150.1G1370.1	cellular organisms	1	100
Oscarella lobularis	Osclob_v00_mik.OX382150.1G1371.1	Oscarella lobularis	7	100
Oscarella lobularis	Osclob_v00_mik.OX382150.1G137.1	cellular organisms	1	100
Oscarella lobularis	Osclob_v00_mik.OX382150.1G1372.1	cellular organisms	1	100
Oscarella lobularis	Osclob_v00_mik.OX382150.1G1373.1	cellular organisms	1	100
Oscarella lobularis	Osclob_v00_mik.OX382150.1G1374.1	Oscarella lobularis	7	100
Oscarella lobularis	Osclob_v00_mik.OX382150.1G1375.1	Metazoa	4	66
Oscarella lobularis	Osclob_v00_mik.OX382150.1G1376.1	Oscarella lobularis	7	100
Oscarella lobularis	Osclob_v00_mik.OX382150.1G1377.1	Metazoa	4	66
Oscarella lobularis	Osclob_v00_mik.OX382150.1G1378.1	Homosclerophorida	6	100
Oscarella lobularis	Osclob_v00_mik.OX382150.1G1379.1	Oscarella lobularis	7	100
Oscarella lobularis	Osclob_v00_mik.OX382150.1G1380.1	cellular organisms	1	100
Oscarella lobularis	Osclob_v00_mik.OX382150.1G1381.1	Metazoa	4	100
Oscarella lobularis	Osclob_v00_mik.OX382150.1G138.1	cellular organisms	1	100
Oscarella lobularis	Osclob_v00_mik.OX382150.1G1383.1	Metazoa	4	100
Oscarella lobularis	Osclob_v00_mik.OX382150.1G1384.1	Metazoa	4	100
Oscarella lobularis	Osclob_v00_mik.OX382150.1G1385.1	cellular organisms	1	100
Oscarella lobularis	Osclob_v00_mik.OX382150.1G1386.1	Oscarella lobularis	7	100
Oscarella lobularis	Osclob_v00_mik.OX382150.1G1387.1	cellular organisms	1	100
Oscarella lobularis	Osclob_v00_mik.OX382150.1G1388.1	Oscarella lobularis	7	100
Oscarella lobularis	Osclob_v00_mik.OX382150.1G1389.1	Oscarella lobularis	7	100
Oscarella lobularis	Osclob_v00_mik.OX382150.1G1390.1	Oscarella lobularis	7	100
Oscarella lobularis	Osclob_v00_mik.OX382150.1G1391.1	Oscarella lobularis	7	100
Oscarella lobularis	Osclob_v00_mik.OX382150.1G1392.1	Oscarella lobularis	7	100
Oscarella lobularis	Osclob_v00_mik.OX382150.1G1393.1	cellular organisms	1	83
Oscarella lobularis	Osclob_v00_mik.OX382150.1G1394.1	Oscarella lobularis	7	100
Oscarella lobularis	Osclob_v00_mik.OX382150.1G1395.1	Oscarella lobularis	7	100
Oscarella lobularis	Osclob_v00_mik.OX382150.1G1396.1	Oscarella lobularis	7	100
Oscarella lobularis	Osclob_v00_mik.OX382150.1G1397.1	Oscarella lobularis	7	100
Oscarella lobularis	Osclob_v00_mik.OX382150.1G1399.1	cellular organisms	1	100
Oscarella lobularis	Osclob_v00_mik.OX382150.1G1400.1	Oscarella lobularis	7	100
Oscarella lobularis	Osclob_v00_mik.OX382150.1G1401.1	Metazoa	4	66
Oscarella lobularis	Osclob_v00_mik.OX382150.1G140.1	Metazoa	4	100
Oscarella lobularis	Osclob_v00_mik.OX382150.1G1402.1	cellular organisms	1	100
Oscarella lobularis	Osclob_v00_mik.OX382150.1G1403.1	cellular organisms	1	100
Oscarella lobularis	Osclob_v00_mik.OX382150.1G1404.1	cellular organisms	1	100
Oscarella lobularis	Osclob_v00_mik.OX382150.1G1405.1	cellular organisms	1	100
Oscarella lobularis	Osclob_v00_mik.OX382150.1G1406.1	cellular organisms	1	100
Oscarella lobularis	Osclob_v00_mik.OX382150.1G1407.1	cellular organisms	1	100
Oscarella lobularis	Osclob_v00_mik.OX382150.1G1408.1	cellular organisms	1	100
Oscarella lobularis	Osclob_v00_mik.OX382150.1G1410.1	cellular organisms	1	100
Oscarella lobularis	Osclob_v00_mik.OX382150.1G1411.1	cellular organisms	1	66
Oscarella lobularis	Osclob_v00_mik.OX382150.1G141.1	Metazoa	4	100
Oscarella lobularis	Osclob_v00_mik.OX382150.1G1412.1	Oscarella lobularis	7	100
Oscarella lobularis	Osclob_v00_mik.OX382150.1G1413.1	cellular organisms	1	100
Oscarella lobularis	Osclob_v00_mik.OX382150.1G1414.1	Opisthokonta	3	75
Oscarella lobularis	Osclob_v00_mik.OX382150.1G1415.1	Oscarella lobularis	7	100
Oscarella lobularis	Osclob_v00_mik.OX382150.1G1417.1	Metazoa	4	66
Oscarella lobularis	Osclob_v00_mik.OX382150.1G1418.1	cellular organisms	1	100
Oscarella lobularis	Osclob_v00_mik.OX382150.1G1419.2	Metazoa	4	33
Oscarella lobularis	Osclob_v00_mik.OX382150.1G14.1	cellular organisms	1	100
Oscarella lobularis	Osclob_v00_mik.OX382150.1G1420.1	cellular organisms	1	100
Oscarella lobularis	Osclob_v00_mik.OX382150.1G1421.1	cellular organisms	1	100
Oscarella lobularis	Osclob_v00_mik.OX382150.1G1422.1	cellular organisms	1	100
Oscarella lobularis	Osclob_v00_mik.OX382150.1G1423.1	cellular organisms	1	100
Oscarella lobularis	Osclob_v00_mik.OX382150.1G1424.1	cellular organisms	1	100
Oscarella lobularis	Osclob_v00_mik.OX382150.1G1425.1	cellular organisms	1	100
Oscarella lobularis	Osclob_v00_mik.OX382150.1G1426.1	Oscarella lobularis	7	100
Oscarella lobularis	Osclob_v00_mik.OX382150.1G1427.1	Metazoa	4	66
Oscarella lobularis	Osclob_v00_mik.OX382150.1G1428.1	Oscarella lobularis	7	100
Oscarella lobularis	Osclob_v00_mik.OX382150.1G1429.1	Oscarella lobularis	7	100
Oscarella lobularis	Osclob_v00_mik.OX382150.1G1430.1	Oscarella lobularis	7	100
Oscarella lobularis	Osclob_v00_mik.OX382150.1G1431.1	cellular organisms	1	66
Oscarella lobularis	Osclob_v00_mik.OX382150.1G143.1	Oscarella lobularis	7	100
Oscarella lobularis	Osclob_v00_mik.OX382150.1G1432.1	cellular organisms	1	66
Oscarella lobularis	Osclob_v00_mik.OX382150.1G1434.1	Metazoa	4	66
Oscarella lobularis	Osclob_v00_mik.OX382150.1G1435.1	cellular organisms	1	66
Oscarella lobularis	Osclob_v00_mik.OX382150.1G1436.1	cellular organisms	1	50
Oscarella lobularis	Osclob_v00_mik.OX382150.1G1437.1	Oscarella lobularis	7	100
Oscarella lobularis	Osclob_v00_mik.OX382150.1G1438.1	Possible contamination or HGT	NA	16
Oscarella lobularis	Osclob_v00_mik.OX382150.1G1439.2	Homosclerophorida	6	100
Oscarella lobularis	Osclob_v00_mik.OX382150.1G1440.1	Oscarella lobularis	7	100
Oscarella lobularis	Osclob_v00_mik.OX382150.1G1441.1	Metazoa	4	100
Oscarella lobularis	Osclob_v00_mik.OX382150.1G144.1	cellular organisms	1	66
Oscarella lobularis	Osclob_v00_mik.OX382150.1G1442.1	Porifera	5	50
Oscarella lobularis	Osclob_v00_mik.OX382150.1G1443.2	cellular organisms	1	66
Oscarella lobularis	Osclob_v00_mik.OX382150.1G1444.1	cellular organisms	1	50
Oscarella lobularis	Osclob_v00_mik.OX382150.1G1445.2	Oscarella lobularis	7	100
Oscarella lobularis	Osclob_v00_mik.OX382150.1G1446.2	Oscarella lobularis	7	100
Oscarella lobularis	Osclob_v00_mik.OX382150.1G1447.1	Oscarella lobularis	7	100
Oscarella lobularis	Osclob_v00_mik.OX382150.1G1448.1	cellular organisms	1	83
Oscarella lobularis	Osclob_v00_mik.OX382150.1G1450.1	Porifera	5	50
Oscarella lobularis	Osclob_v00_mik.OX382150.1G1451.1	Metazoa	4	66
Oscarella lobularis	Osclob_v00_mik.OX382150.1G145.1	cellular organisms	1	100
Oscarella lobularis	Osclob_v00_mik.OX382150.1G1452.1	Eukaryota	2	100
Oscarella lobularis	Osclob_v00_mik.OX382150.1G1453.1	Eukaryota	2	100
Oscarella lobularis	Osclob_v00_mik.OX382150.1G1454.1	Eukaryota	2	100
Oscarella lobularis	Osclob_v00_mik.OX382150.1G1455.1	Eukaryota	2	100
Oscarella lobularis	Osclob_v00_mik.OX382150.1G1456.1	Homosclerophorida	6	100
Oscarella lobularis	Osclob_v00_mik.OX382150.1G1457.1	cellular organisms	1	100
Oscarella lobularis	Osclob_v00_mik.OX382150.1G1458.2	Porifera	5	50
Oscarella lobularis	Osclob_v00_mik.OX382150.1G1459.1	Eukaryota	2	100
Oscarella lobularis	Osclob_v00_mik.OX382150.1G1460.1	cellular organisms	1	100
Oscarella lobularis	Osclob_v00_mik.OX382150.1G1461.1	cellular organisms	1	100
Oscarella lobularis	Osclob_v00_mik.OX382150.1G146.1	Oscarella lobularis	7	100
Oscarella lobularis	Osclob_v00_mik.OX382150.1G1462.1	Metazoa	4	66
Oscarella lobularis	Osclob_v00_mik.OX382150.1G1463.1	Eukaryota	2	100
Oscarella lobularis	Osclob_v00_mik.OX382150.1G1464.1	cellular organisms	1	100
Oscarella lobularis	Osclob_v00_mik.OX382150.1G1465.1	Homosclerophorida	6	100
Oscarella lobularis	Osclob_v00_mik.OX382150.1G1466.1	cellular organisms	1	100
Oscarella lobularis	Osclob_v00_mik.OX382150.1G1467.1	cellular organisms	1	100
Oscarella lobularis	Osclob_v00_mik.OX382150.1G1468.1	cellular organisms	1	100
Oscarella lobularis	Osclob_v00_mik.OX382150.1G1470.1	cellular organisms	1	100
Oscarella lobularis	Osclob_v00_mik.OX382150.1G1471.1	cellular organisms	1	100
Oscarella lobularis	Osclob_v00_mik.OX382150.1G147.1	Eukaryota	2	100
Oscarella lobularis	Osclob_v00_mik.OX382150.1G1472.1	cellular organisms	1	100
Oscarella lobularis	Osclob_v00_mik.OX382150.1G1473.1	cellular organisms	1	100
Oscarella lobularis	Osclob_v00_mik.OX382150.1G1474.1	cellular organisms	1	100
Oscarella lobularis	Osclob_v00_mik.OX382150.1G1475.1	cellular organisms	1	100
Oscarella lobularis	Osclob_v00_mik.OX382150.1G1476.1	cellular organisms	1	83
Oscarella lobularis	Osclob_v00_mik.OX382150.1G1477.1	cellular organisms	1	100
Oscarella lobularis	Osclob_v00_mik.OX382150.1G1478.1	cellular organisms	1	33
Oscarella lobularis	Osclob_v00_mik.OX382150.1G1479.1	cellular organisms	1	33
Oscarella lobularis	Osclob_v00_mik.OX382150.1G1480.1	cellular organisms	1	100
Oscarella lobularis	Osclob_v00_mik.OX382150.1G1481.1	Oscarella lobularis	7	100
Oscarella lobularis	Osclob_v00_mik.OX382150.1G148.1	cellular organisms	1	100
Oscarella lobularis	Osclob_v00_mik.OX382150.1G1482.1	cellular organisms	1	100
Oscarella lobularis	Osclob_v00_mik.OX382150.1G1483.1	Oscarella lobularis	7	100
Oscarella lobularis	Osclob_v00_mik.OX382150.1G1484.1	cellular organisms	1	66
Oscarella lobularis	Osclob_v00_mik.OX382150.1G1485.1	Oscarella lobularis	7	100
Oscarella lobularis	Osclob_v00_mik.OX382150.1G1486.1	Metazoa	4	100
Oscarella lobularis	Osclob_v00_mik.OX382150.1G1487.1	cellular organisms	1	66
Oscarella lobularis	Osclob_v00_mik.OX382150.1G1490.1	Eukaryota	2	100
Oscarella lobularis	Osclob_v00_mik.OX382150.1G1491.1	cellular organisms	1	100
Oscarella lobularis	Osclob_v00_mik.OX382150.1G149.1	Eukaryota	2	80
Oscarella lobularis	Osclob_v00_mik.OX382150.1G1492.1	cellular organisms	1	100
Oscarella lobularis	Osclob_v00_mik.OX382150.1G1493.1	Metazoa	4	66
Oscarella lobularis	Osclob_v00_mik.OX382150.1G1494.1	cellular organisms	1	100
Oscarella lobularis	Osclob_v00_mik.OX382150.1G1495.1	cellular organisms	1	100
Oscarella lobularis	Osclob_v00_mik.OX382150.1G1496.1	cellular organisms	1	100
Oscarella lobularis	Osclob_v00_mik.OX382150.1G1497.1	cellular organisms	1	100
Oscarella lobularis	Osclob_v00_mik.OX382150.1G1498.1	cellular organisms	1	83
Oscarella lobularis	Osclob_v00_mik.OX382150.1G1499.1	cellular organisms	1	50
Oscarella lobularis	Osclob_v00_mik.OX382150.1G1500.1	Metazoa	4	100
Oscarella lobularis	Osclob_v00_mik.OX382150.1G1501.1	Metazoa	4	66
Oscarella lobularis	Osclob_v00_mik.OX382150.1G150.1	Opisthokonta	3	100
Oscarella lobularis	Osclob_v00_mik.OX382150.1G1502.1	Oscarella lobularis	7	100
Oscarella lobularis	Osclob_v00_mik.OX382150.1G1503.1	Oscarella lobularis	7	100
Oscarella lobularis	Osclob_v00_mik.OX382150.1G1504.1	Oscarella lobularis	7	100
Oscarella lobularis	Osclob_v00_mik.OX382150.1G1506.2	Oscarella lobularis	7	100
Oscarella lobularis	Osclob_v00_mik.OX382150.1G1507.1	Metazoa	4	66
Oscarella lobularis	Osclob_v00_mik.OX382150.1G1508.1	Oscarella lobularis	7	100
Oscarella lobularis	Osclob_v00_mik.OX382150.1G1509.1	Oscarella lobularis	7	100
Oscarella lobularis	Osclob_v00_mik.OX382150.1G1510.1	Metazoa	4	66
Oscarella lobularis	Osclob_v00_mik.OX382150.1G1511.1	Oscarella lobularis	7	100
Oscarella lobularis	Osclob_v00_mik.OX382150.1G151.1	Homosclerophorida	6	100
Oscarella lobularis	Osclob_v00_mik.OX382150.1G1512.1	Oscarella lobularis	7	100
Oscarella lobularis	Osclob_v00_mik.OX382150.1G1513.1	Oscarella lobularis	7	100
Oscarella lobularis	Osclob_v00_mik.OX382150.1G1514.1	Metazoa	4	66
Oscarella lobularis	Osclob_v00_mik.OX382150.1G1515.1	Oscarella lobularis	7	100
Oscarella lobularis	Osclob_v00_mik.OX382150.1G1516.1	Oscarella lobularis	7	100
Oscarella lobularis	Osclob_v00_mik.OX382150.1G1517.1	Metazoa	4	100
Oscarella lobularis	Osclob_v00_mik.OX382150.1G1518.1	Oscarella lobularis	7	100
Oscarella lobularis	Osclob_v00_mik.OX382150.1G1519.1	Oscarella lobularis	7	100
Oscarella lobularis	Osclob_v00_mik.OX382150.1G15.1	cellular organisms	1	100
Oscarella lobularis	Osclob_v00_mik.OX382150.1G1520.1	Oscarella lobularis	7	100
Oscarella lobularis	Osclob_v00_mik.OX382150.1G1521.1	Oscarella lobularis	7	100
Oscarella lobularis	Osclob_v00_mik.OX382150.1G152.1	Porifera	5	100
Oscarella lobularis	Osclob_v00_mik.OX382150.1G1522.1	Oscarella lobularis	7	100
Oscarella lobularis	Osclob_v00_mik.OX382150.1G1523.1	Oscarella lobularis	7	100
Oscarella lobularis	Osclob_v00_mik.OX382150.1G1524.1	cellular organisms	1	66
Oscarella lobularis	Osclob_v00_mik.OX382150.1G1525.1	Oscarella lobularis	7	100
Oscarella lobularis	Osclob_v00_mik.OX382150.1G1526.2	Oscarella lobularis	7	100
Oscarella lobularis	Osclob_v00_mik.OX382150.1G1527.1	Oscarella lobularis	7	100
Oscarella lobularis	Osclob_v00_mik.OX382150.1G1528.1	cellular organisms	1	100
Oscarella lobularis	Osclob_v00_mik.OX382150.1G1529.1	Oscarella lobularis	7	100
Oscarella lobularis	Osclob_v00_mik.OX382150.1G1530.1	cellular organisms	1	66
Oscarella lobularis	Osclob_v00_mik.OX382150.1G1531.1	Possible contamination or HGT	NA	25
Oscarella lobularis	Osclob_v00_mik.OX382150.1G1532.1	cellular organisms	1	66
Oscarella lobularis	Osclob_v00_mik.OX382150.1G1533.1	cellular organisms	1	100
Oscarella lobularis	Osclob_v00_mik.OX382150.1G1534.1	cellular organisms	1	100
Oscarella lobularis	Osclob_v00_mik.OX382150.1G1535.1	cellular organisms	1	83
Oscarella lobularis	Osclob_v00_mik.OX382150.1G1536.1	cellular organisms	1	100
Oscarella lobularis	Osclob_v00_mik.OX382150.1G1537.1	cellular organisms	1	100
Oscarella lobularis	Osclob_v00_mik.OX382150.1G1538.1	Oscarella lobularis	7	100
Oscarella lobularis	Osclob_v00_mik.OX382150.1G1539.1	cellular organisms	1	100
Oscarella lobularis	Osclob_v00_mik.OX382150.1G1540.1	Oscarella lobularis	7	100
Oscarella lobularis	Osclob_v00_mik.OX382150.1G1541.1	cellular organisms	1	100
Oscarella lobularis	Osclob_v00_mik.OX382150.1G154.1	Porifera	5	100
Oscarella lobularis	Osclob_v00_mik.OX382150.1G1542.1	cellular organisms	1	100
Oscarella lobularis	Osclob_v00_mik.OX382150.1G1543.1	Oscarella lobularis	7	100
Oscarella lobularis	Osclob_v00_mik.OX382150.1G1544.1	cellular organisms	1	83
Oscarella lobularis	Osclob_v00_mik.OX382150.1G1545.1	Oscarella lobularis	7	100
Oscarella lobularis	Osclob_v00_mik.OX382150.1G1546.1	Metazoa	4	100
Oscarella lobularis	Osclob_v00_mik.OX382150.1G1547.1	Oscarella lobularis	7	100
Oscarella lobularis	Osclob_v00_mik.OX382150.1G1548.2	cellular organisms	1	100
Oscarella lobularis	Osclob_v00_mik.OX382150.1G1549.1	cellular organisms	1	100
Oscarella lobularis	Osclob_v00_mik.OX382150.1G1550.1	Eukaryota	2	80
Oscarella lobularis	Osclob_v00_mik.OX382150.1G1551.1	Oscarella lobularis	7	100
Oscarella lobularis	Osclob_v00_mik.OX382150.1G155.1	Porifera	5	50
Oscarella lobularis	Osclob_v00_mik.OX382150.1G1552.1	cellular organisms	1	83
Oscarella lobularis	Osclob_v00_mik.OX382150.1G1553.1	Eukaryota	2	80
Oscarella lobularis	Osclob_v00_mik.OX382150.1G1554.1	Eukaryota	2	100
Oscarella lobularis	Osclob_v00_mik.OX382150.1G1555.1	Oscarella lobularis	7	100
Oscarella lobularis	Osclob_v00_mik.OX382150.1G1556.1	Oscarella lobularis	7	100
Oscarella lobularis	Osclob_v00_mik.OX382150.1G1557.1	Eukaryota	2	80
Oscarella lobularis	Osclob_v00_mik.OX382150.1G1558.1	cellular organisms	1	100
Oscarella lobularis	Osclob_v00_mik.OX382150.1G1559.1	Oscarella lobularis	7	100
Oscarella lobularis	Osclob_v00_mik.OX382150.1G1560.1	cellular organisms	1	100
Oscarella lobularis	Osclob_v00_mik.OX382150.1G1561.1	Homosclerophorida	6	100
Oscarella lobularis	Osclob_v00_mik.OX382150.1G156.1	Possible contamination or HGT	NA	25
Oscarella lobularis	Osclob_v00_mik.OX382150.1G1562.1	Metazoa	4	100
Oscarella lobularis	Osclob_v00_mik.OX382150.1G1563.1	Eukaryota	2	100
Oscarella lobularis	Osclob_v00_mik.OX382150.1G1564.1	Eukaryota	2	100
Oscarella lobularis	Osclob_v00_mik.OX382150.1G1565.1	Eukaryota	2	100
Oscarella lobularis	Osclob_v00_mik.OX382150.1G1566.1	cellular organisms	1	100
Oscarella lobularis	Osclob_v00_mik.OX382150.1G1567.1	Oscarella lobularis	7	100
Oscarella lobularis	Osclob_v00_mik.OX382150.1G1568.1	cellular organisms	1	100
Oscarella lobularis	Osclob_v00_mik.OX382150.1G1569.1	cellular organisms	1	100
Oscarella lobularis	Osclob_v00_mik.OX382150.1G1571.1	Oscarella lobularis	7	100
Oscarella lobularis	Osclob_v00_mik.OX382150.1G157.1	Porifera	5	50
Oscarella lobularis	Osclob_v00_mik.OX382150.1G1573.1	cellular organisms	1	83
Oscarella lobularis	Osclob_v00_mik.OX382150.1G1574.1	Metazoa	4	100
Oscarella lobularis	Osclob_v00_mik.OX382150.1G1575.1	Eukaryota	2	100
Oscarella lobularis	Osclob_v00_mik.OX382150.1G1576.1	cellular organisms	1	100
Oscarella lobularis	Osclob_v00_mik.OX382150.1G1577.1	Eukaryota	2	100
Oscarella lobularis	Osclob_v00_mik.OX382150.1G1578.1	cellular organisms	1	50
Oscarella lobularis	Osclob_v00_mik.OX382150.1G1581.1	cellular organisms	1	100
Oscarella lobularis	Osclob_v00_mik.OX382150.1G158.1	Oscarella lobularis	7	100
Oscarella lobularis	Osclob_v00_mik.OX382150.1G1582.1	cellular organisms	1	100
Oscarella lobularis	Osclob_v00_mik.OX382150.1G1583.1	Homosclerophorida	6	100
Oscarella lobularis	Osclob_v00_mik.OX382150.1G1584.1	Oscarella lobularis	7	100
Oscarella lobularis	Osclob_v00_mik.OX382150.1G1585.1	cellular organisms	1	100
Oscarella lobularis	Osclob_v00_mik.OX382150.1G1586.1	Eukaryota	2	100
Oscarella lobularis	Osclob_v00_mik.OX382150.1G1587.1	cellular organisms	1	100
Oscarella lobularis	Osclob_v00_mik.OX382150.1G1588.1	cellular organisms	1	100
Oscarella lobularis	Osclob_v00_mik.OX382150.1G1589.1	Oscarella lobularis	7	100
Oscarella lobularis	Osclob_v00_mik.OX382150.1G1590.1	cellular organisms	1	100
Oscarella lobularis	Osclob_v00_mik.OX382150.1G1591.1	Oscarella lobularis	7	100
Oscarella lobularis	Osclob_v00_mik.OX382150.1G159.1	Metazoa	4	100
Oscarella lobularis	Osclob_v00_mik.OX382150.1G1592.1	Oscarella lobularis	7	100
Oscarella lobularis	Osclob_v00_mik.OX382150.1G1593.1	Metazoa	4	66
Oscarella lobularis	Osclob_v00_mik.OX382150.1G1594.1	Metazoa	4	66
Oscarella lobularis	Osclob_v00_mik.OX382150.1G1596.1	Eukaryota	2	100
Oscarella lobularis	Osclob_v00_mik.OX382150.1G1597.1	Oscarella lobularis	7	100
Oscarella lobularis	Osclob_v00_mik.OX382150.1G1598.1	Opisthokonta	3	75
Oscarella lobularis	Osclob_v00_mik.OX382150.1G1599.1	Oscarella lobularis	7	100
Oscarella lobularis	Osclob_v00_mik.OX382150.1G1600.1	Oscarella lobularis	7	100
Oscarella lobularis	Osclob_v00_mik.OX382150.1G1601.2	Oscarella lobularis	7	100
Oscarella lobularis	Osclob_v00_mik.OX382150.1G160.1	Oscarella lobularis	7	100
Oscarella lobularis	Osclob_v00_mik.OX382150.1G1602.1	cellular organisms	1	83
Oscarella lobularis	Osclob_v00_mik.OX382150.1G1603.1	Oscarella lobularis	7	100
Oscarella lobularis	Osclob_v00_mik.OX382150.1G1605.1	Metazoa	4	66
Oscarella lobularis	Osclob_v00_mik.OX382150.1G1607.1	Homosclerophorida	6	100
Oscarella lobularis	Osclob_v00_mik.OX382150.1G1608.1	Oscarella lobularis	7	100
Oscarella lobularis	Osclob_v00_mik.OX382150.1G1609.1	cellular organisms	1	83
Oscarella lobularis	Osclob_v00_mik.OX382150.1G1610.1	cellular organisms	1	66
Oscarella lobularis	Osclob_v00_mik.OX382150.1G161.1	cellular organisms	1	100
Oscarella lobularis	Osclob_v00_mik.OX382150.1G1612.1	Oscarella lobularis	7	100
Oscarella lobularis	Osclob_v00_mik.OX382150.1G1613.1	cellular organisms	1	100
Oscarella lobularis	Osclob_v00_mik.OX382150.1G1614.1	Eukaryota	2	100
Oscarella lobularis	Osclob_v00_mik.OX382150.1G1615.1	Oscarella lobularis	7	100
Oscarella lobularis	Osclob_v00_mik.OX382150.1G1616.1	Oscarella lobularis	7	100
Oscarella lobularis	Osclob_v00_mik.OX382150.1G1617.2	Oscarella lobularis	7	100
Oscarella lobularis	Osclob_v00_mik.OX382150.1G1618.1	cellular organisms	1	100
Oscarella lobularis	Osclob_v00_mik.OX382150.1G1619.1	cellular organisms	1	100
Oscarella lobularis	Osclob_v00_mik.OX382150.1G16.1	cellular organisms	1	100
Oscarella lobularis	Osclob_v00_mik.OX382150.1G1620.1	Metazoa	4	66
Oscarella lobularis	Osclob_v00_mik.OX382150.1G1621.1	Metazoa	4	100
Oscarella lobularis	Osclob_v00_mik.OX382150.1G1623.1	Metazoa	4	100
Oscarella lobularis	Osclob_v00_mik.OX382150.1G1624.1	Homosclerophorida	6	100
Oscarella lobularis	Osclob_v00_mik.OX382150.1G1625.1	cellular organisms	1	100
Oscarella lobularis	Osclob_v00_mik.OX382150.1G1626.1	cellular organisms	1	100
Oscarella lobularis	Osclob_v00_mik.OX382150.1G1627.2	Oscarella lobularis	7	100
Oscarella lobularis	Osclob_v00_mik.OX382150.1G1628.1	Oscarella lobularis	7	100
Oscarella lobularis	Osclob_v00_mik.OX382150.1G1629.1	cellular organisms	1	100
Oscarella lobularis	Osclob_v00_mik.OX382150.1G1630.1	cellular organisms	1	100
Oscarella lobularis	Osclob_v00_mik.OX382150.1G1631.1	cellular organisms	1	100
Oscarella lobularis	Osclob_v00_mik.OX382150.1G163.1	cellular organisms	1	100
Oscarella lobularis	Osclob_v00_mik.OX382150.1G1632.1	Opisthokonta	3	100
Oscarella lobularis	Osclob_v00_mik.OX382150.1G1633.1	cellular organisms	1	100
Oscarella lobularis	Osclob_v00_mik.OX382150.1G1634.1	cellular organisms	1	100
Oscarella lobularis	Osclob_v00_mik.OX382150.1G1635.1	Eukaryota	2	100
Oscarella lobularis	Osclob_v00_mik.OX382150.1G1636.1	cellular organisms	1	83
Oscarella lobularis	Osclob_v00_mik.OX382150.1G1637.1	cellular organisms	1	100
Oscarella lobularis	Osclob_v00_mik.OX382150.1G1638.1	cellular organisms	1	100
Oscarella lobularis	Osclob_v00_mik.OX382150.1G1640.1	Oscarella lobularis	7	100
Oscarella lobularis	Osclob_v00_mik.OX382150.1G1641.1	cellular organisms	1	100
Oscarella lobularis	Osclob_v00_mik.OX382150.1G164.1	cellular organisms	1	100
Oscarella lobularis	Osclob_v00_mik.OX382150.1G1642.1	cellular organisms	1	100
Oscarella lobularis	Osclob_v00_mik.OX382150.1G1643.1	Eukaryota	2	100
Oscarella lobularis	Osclob_v00_mik.OX382150.1G1644.1	Homosclerophorida	6	100
Oscarella lobularis	Osclob_v00_mik.OX382150.1G1645.2	Eukaryota	2	100
Oscarella lobularis	Osclob_v00_mik.OX382150.1G1646.1	Oscarella lobularis	7	100
Oscarella lobularis	Osclob_v00_mik.OX382150.1G1647.1	cellular organisms	1	100
Oscarella lobularis	Osclob_v00_mik.OX382150.1G1648.1	Eukaryota	2	100
Oscarella lobularis	Osclob_v00_mik.OX382150.1G1649.1	Oscarella lobularis	7	100
Oscarella lobularis	Osclob_v00_mik.OX382150.1G1650.1	cellular organisms	1	100
Oscarella lobularis	Osclob_v00_mik.OX382150.1G1651.1	cellular organisms	1	100
Oscarella lobularis	Osclob_v00_mik.OX382150.1G165.1	cellular organisms	1	100
Oscarella lobularis	Osclob_v00_mik.OX382150.1G1652.1	Eukaryota	2	100
Oscarella lobularis	Osclob_v00_mik.OX382150.1G1653.1	Porifera	5	50
Oscarella lobularis	Osclob_v00_mik.OX382150.1G1654.1	Eukaryota	2	100
Oscarella lobularis	Osclob_v00_mik.OX382150.1G1655.1	Oscarella lobularis	7	100
Oscarella lobularis	Osclob_v00_mik.OX382150.1G1656.1	cellular organisms	1	100
Oscarella lobularis	Osclob_v00_mik.OX382150.1G1657.1	cellular organisms	1	66
Oscarella lobularis	Osclob_v00_mik.OX382150.1G1658.1	Metazoa	4	100
Oscarella lobularis	Osclob_v00_mik.OX382150.1G1659.1	cellular organisms	1	66
Oscarella lobularis	Osclob_v00_mik.OX382150.1G1660.1	Metazoa	4	100
Oscarella lobularis	Osclob_v00_mik.OX382150.1G1661.1	Oscarella lobularis	7	100
Oscarella lobularis	Osclob_v00_mik.OX382150.1G166.1	Eukaryota	2	100
Oscarella lobularis	Osclob_v00_mik.OX382150.1G1662.1	Oscarella lobularis	7	100
Oscarella lobularis	Osclob_v00_mik.OX382150.1G1663.1	Oscarella lobularis	7	100
Oscarella lobularis	Osclob_v00_mik.OX382150.1G1664.1	cellular organisms	1	66
Oscarella lobularis	Osclob_v00_mik.OX382150.1G1665.1	Oscarella lobularis	7	100
Oscarella lobularis	Osclob_v00_mik.OX382150.1G1666.1	Oscarella lobularis	7	100
Oscarella lobularis	Osclob_v00_mik.OX382150.1G1667.2	cellular organisms	1	100
Oscarella lobularis	Osclob_v00_mik.OX382150.1G1668.1	cellular organisms	1	100
Oscarella lobularis	Osclob_v00_mik.OX382150.1G1669.1	Opisthokonta	3	100
Oscarella lobularis	Osclob_v00_mik.OX382150.1G1670.1	cellular organisms	1	100
Oscarella lobularis	Osclob_v00_mik.OX382150.1G1671.1	cellular organisms	1	100
Oscarella lobularis	Osclob_v00_mik.OX382150.1G167.1	Opisthokonta	3	100
Oscarella lobularis	Osclob_v00_mik.OX382150.1G1672.1	Metazoa	4	66
Oscarella lobularis	Osclob_v00_mik.OX382150.1G1673.1	Oscarella lobularis	7	100
Oscarella lobularis	Osclob_v00_mik.OX382150.1G1674.1	cellular organisms	1	83
Oscarella lobularis	Osclob_v00_mik.OX382150.1G1675.1	cellular organisms	1	100
Oscarella lobularis	Osclob_v00_mik.OX382150.1G1676.1	cellular organisms	1	100
Oscarella lobularis	Osclob_v00_mik.OX382150.1G1677.1	Oscarella lobularis	7	100
Oscarella lobularis	Osclob_v00_mik.OX382150.1G1678.1	cellular organisms	1	100
Oscarella lobularis	Osclob_v00_mik.OX382150.1G1679.1	cellular organisms	1	100
Oscarella lobularis	Osclob_v00_mik.OX382150.1G1680.1	Porifera	5	50
Oscarella lobularis	Osclob_v00_mik.OX382150.1G1681.1	cellular organisms	1	100
Oscarella lobularis	Osclob_v00_mik.OX382150.1G168.1	Metazoa	4	100
Oscarella lobularis	Osclob_v00_mik.OX382150.1G1682.1	cellular organisms	1	100
Oscarella lobularis	Osclob_v00_mik.OX382150.1G1683.1	cellular organisms	1	100
Oscarella lobularis	Osclob_v00_mik.OX382150.1G1684.1	Eukaryota	2	100
Oscarella lobularis	Osclob_v00_mik.OX382150.1G1685.1	cellular organisms	1	100
Oscarella lobularis	Osclob_v00_mik.OX382150.1G1686.1	cellular organisms	1	100
Oscarella lobularis	Osclob_v00_mik.OX382150.1G1687.1	Oscarella lobularis	7	100
Oscarella lobularis	Osclob_v00_mik.OX382150.1G1688.1	Homosclerophorida	6	100
Oscarella lobularis	Osclob_v00_mik.OX382150.1G1689.1	Oscarella lobularis	7	100
Oscarella lobularis	Osclob_v00_mik.OX382150.1G1690.1	Oscarella lobularis	7	100
Oscarella lobularis	Osclob_v00_mik.OX382150.1G1691.1	Oscarella lobularis	7	100
Oscarella lobularis	Osclob_v00_mik.OX382150.1G169.1	Oscarella lobularis	7	100
Oscarella lobularis	Osclob_v00_mik.OX382150.1G1692.3	Oscarella lobularis	7	100
Oscarella lobularis	Osclob_v00_mik.OX382150.1G1693.2	Metazoa	4	66
Oscarella lobularis	Osclob_v00_mik.OX382150.1G1694.1	cellular organisms	1	100
Oscarella lobularis	Osclob_v00_mik.OX382150.1G1695.2	Oscarella lobularis	7	100
Oscarella lobularis	Osclob_v00_mik.OX382150.1G1697.1	Metazoa	4	66
Oscarella lobularis	Osclob_v00_mik.OX382150.1G1698.1	Metazoa	4	66
Oscarella lobularis	Osclob_v00_mik.OX382150.1G1699.1	Metazoa	4	66
Oscarella lobularis	Osclob_v00_mik.OX382150.1G170.1	Oscarella lobularis	7	100
Oscarella lobularis	Osclob_v00_mik.OX382150.1G1702.1	Oscarella lobularis	7	100
Oscarella lobularis	Osclob_v00_mik.OX382150.1G1705.1	Oscarella lobularis	7	100
Oscarella lobularis	Osclob_v00_mik.OX382150.1G1706.1	Oscarella lobularis	7	100
Oscarella lobularis	Osclob_v00_mik.OX382150.1G1710.1	Oscarella lobularis	7	100
Oscarella lobularis	Osclob_v00_mik.OX382150.1G1711.1	Homosclerophorida	6	100
Oscarella lobularis	Osclob_v00_mik.OX382150.1G171.1	Homosclerophorida	6	100
Oscarella lobularis	Osclob_v00_mik.OX382150.1G1712.1	Oscarella lobularis	7	100
Oscarella lobularis	Osclob_v00_mik.OX382150.1G1713.1	Homosclerophorida	6	100
Oscarella lobularis	Osclob_v00_mik.OX382150.1G1714.1	Homosclerophorida	6	100
Oscarella lobularis	Osclob_v00_mik.OX382150.1G1716.1	Oscarella lobularis	7	100
Oscarella lobularis	Osclob_v00_mik.OX382150.1G1717.1	Metazoa	4	66
Oscarella lobularis	Osclob_v00_mik.OX382150.1G1719.1	Oscarella lobularis	7	100
Oscarella lobularis	Osclob_v00_mik.OX382150.1G17.1	Metazoa	4	100
Oscarella lobularis	Osclob_v00_mik.OX382150.1G1720.1	Oscarella lobularis	7	100
Oscarella lobularis	Osclob_v00_mik.OX382150.1G1721.1	Oscarella lobularis	7	100
Oscarella lobularis	Osclob_v00_mik.OX382150.1G172.1	Metazoa	4	100
Oscarella lobularis	Osclob_v00_mik.OX382150.1G1722.1	Oscarella lobularis	7	100
Oscarella lobularis	Osclob_v00_mik.OX382150.1G1723.1	Homosclerophorida	6	100
Oscarella lobularis	Osclob_v00_mik.OX382150.1G1724.1	Oscarella lobularis	7	100
Oscarella lobularis	Osclob_v00_mik.OX382150.1G1725.1	Oscarella lobularis	7	100
Oscarella lobularis	Osclob_v00_mik.OX382150.1G1726.1	Oscarella lobularis	7	100
Oscarella lobularis	Osclob_v00_mik.OX382150.1G1727.1	Oscarella lobularis	7	100
Oscarella lobularis	Osclob_v00_mik.OX382150.1G1729.1	Oscarella lobularis	7	100
Oscarella lobularis	Osclob_v00_mik.OX382150.1G1730.1	Metazoa	4	66
Oscarella lobularis	Osclob_v00_mik.OX382150.1G1731.1	Metazoa	4	66
Oscarella lobularis	Osclob_v00_mik.OX382150.1G173.1	Metazoa	4	100
Oscarella lobularis	Osclob_v00_mik.OX382150.1G1732.1	Metazoa	4	100
Oscarella lobularis	Osclob_v00_mik.OX382150.1G1733.1	Metazoa	4	66
Oscarella lobularis	Osclob_v00_mik.OX382150.1G1734.1	Porifera	5	100
Oscarella lobularis	Osclob_v00_mik.OX382150.1G1735.1	Oscarella lobularis	7	100
Oscarella lobularis	Osclob_v00_mik.OX382150.1G1737.1	Oscarella lobularis	7	100
Oscarella lobularis	Osclob_v00_mik.OX382150.1G1738.1	Eukaryota	2	80
Oscarella lobularis	Osclob_v00_mik.OX382150.1G1739.1	Oscarella lobularis	7	100
Oscarella lobularis	Osclob_v00_mik.OX382150.1G1740.1	Eukaryota	2	80
Oscarella lobularis	Osclob_v00_mik.OX382150.1G1741.1	Oscarella lobularis	7	100
Oscarella lobularis	Osclob_v00_mik.OX382150.1G174.1	Metazoa	4	100
Oscarella lobularis	Osclob_v00_mik.OX382150.1G1742.1	Homosclerophorida	6	100
Oscarella lobularis	Osclob_v00_mik.OX382150.1G1743.1	Oscarella lobularis	7	100
Oscarella lobularis	Osclob_v00_mik.OX382150.1G1745.1	cellular organisms	1	100
Oscarella lobularis	Osclob_v00_mik.OX382150.1G1746.1	cellular organisms	1	83
Oscarella lobularis	Osclob_v00_mik.OX382150.1G1747.1	cellular organisms	1	100
Oscarella lobularis	Osclob_v00_mik.OX382150.1G1748.1	cellular organisms	1	100
Oscarella lobularis	Osclob_v00_mik.OX382150.1G1749.1	cellular organisms	1	100
Oscarella lobularis	Osclob_v00_mik.OX382150.1G1750.1	Oscarella lobularis	7	100
Oscarella lobularis	Osclob_v00_mik.OX382150.1G1751.1	Eukaryota	2	80
Oscarella lobularis	Osclob_v00_mik.OX382150.1G175.1	cellular organisms	1	100
Oscarella lobularis	Osclob_v00_mik.OX382150.1G1752.1	cellular organisms	1	33
Oscarella lobularis	Osclob_v00_mik.OX382150.1G1753.1	Oscarella lobularis	7	100
Oscarella lobularis	Osclob_v00_mik.OX382150.1G1754.1	Homosclerophorida	6	100
Oscarella lobularis	Osclob_v00_mik.OX382150.1G1755.1	cellular organisms	1	66
Oscarella lobularis	Osclob_v00_mik.OX382150.1G1756.1	cellular organisms	1	100
Oscarella lobularis	Osclob_v00_mik.OX382150.1G1757.1	cellular organisms	1	83
Oscarella lobularis	Osclob_v00_mik.OX382150.1G1758.1	Oscarella lobularis	7	100
Oscarella lobularis	Osclob_v00_mik.OX382150.1G1759.1	Oscarella lobularis	7	100
Oscarella lobularis	Osclob_v00_mik.OX382150.1G1760.1	Oscarella lobularis	7	100
Oscarella lobularis	Osclob_v00_mik.OX382150.1G1761.1	cellular organisms	1	100
Oscarella lobularis	Osclob_v00_mik.OX382150.1G176.1	Eukaryota	2	100
Oscarella lobularis	Osclob_v00_mik.OX382150.1G1763.1	cellular organisms	1	100
Oscarella lobularis	Osclob_v00_mik.OX382150.1G1765.1	cellular organisms	1	100
Oscarella lobularis	Osclob_v00_mik.OX382150.1G1766.1	Eukaryota	2	100
Oscarella lobularis	Osclob_v00_mik.OX382150.1G1767.1	cellular organisms	1	66
Oscarella lobularis	Osclob_v00_mik.OX382150.1G1768.1	cellular organisms	1	66
Oscarella lobularis	Osclob_v00_mik.OX382150.1G1769.1	cellular organisms	1	100
Oscarella lobularis	Osclob_v00_mik.OX382150.1G1770.1	cellular organisms	1	100
Oscarella lobularis	Osclob_v00_mik.OX382150.1G1771.1	cellular organisms	1	100
Oscarella lobularis	Osclob_v00_mik.OX382150.1G177.1	cellular organisms	1	83
Oscarella lobularis	Osclob_v00_mik.OX382150.1G1772.1	Homosclerophorida	6	100
Oscarella lobularis	Osclob_v00_mik.OX382150.1G1773.1	cellular organisms	1	100
Oscarella lobularis	Osclob_v00_mik.OX382150.1G1774.1	cellular organisms	1	100
Oscarella lobularis	Osclob_v00_mik.OX382150.1G1775.1	Oscarella lobularis	7	100
Oscarella lobularis	Osclob_v00_mik.OX382150.1G1776.1	Oscarella lobularis	7	100
Oscarella lobularis	Osclob_v00_mik.OX382150.1G1777.1	cellular organisms	1	100
Oscarella lobularis	Osclob_v00_mik.OX382150.1G1778.1	cellular organisms	1	100
Oscarella lobularis	Osclob_v00_mik.OX382150.1G1779.1	cellular organisms	1	100
Oscarella lobularis	Osclob_v00_mik.OX382150.1G1780.1	cellular organisms	1	100
Oscarella lobularis	Osclob_v00_mik.OX382150.1G1781.1	Eukaryota	2	100
Oscarella lobularis	Osclob_v00_mik.OX382150.1G178.1	cellular organisms	1	100
Oscarella lobularis	Osclob_v00_mik.OX382150.1G1782.1	cellular organisms	1	100
Oscarella lobularis	Osclob_v00_mik.OX382150.1G1783.1	Opisthokonta	3	100
Oscarella lobularis	Osclob_v00_mik.OX382150.1G1784.1	cellular organisms	1	100
Oscarella lobularis	Osclob_v00_mik.OX382150.1G1785.1	cellular organisms	1	100
Oscarella lobularis	Osclob_v00_mik.OX382150.1G1786.1	cellular organisms	1	100
Oscarella lobularis	Osclob_v00_mik.OX382150.1G1787.1	cellular organisms	1	100
Oscarella lobularis	Osclob_v00_mik.OX382150.1G1788.1	Oscarella lobularis	7	100
Oscarella lobularis	Osclob_v00_mik.OX382150.1G1789.1	Porifera	5	100
Oscarella lobularis	Osclob_v00_mik.OX382150.1G1790.1	cellular organisms	1	100
Oscarella lobularis	Osclob_v00_mik.OX382150.1G1791.1	cellular organisms	1	100
Oscarella lobularis	Osclob_v00_mik.OX382150.1G179.1	Eukaryota	2	100
Oscarella lobularis	Osclob_v00_mik.OX382150.1G1792.1	Oscarella lobularis	7	100
Oscarella lobularis	Osclob_v00_mik.OX382150.1G1793.1	cellular organisms	1	100
Oscarella lobularis	Osclob_v00_mik.OX382150.1G1794.1	cellular organisms	1	100
Oscarella lobularis	Osclob_v00_mik.OX382150.1G1795.1	cellular organisms	1	100
Oscarella lobularis	Osclob_v00_mik.OX382150.1G1796.1	cellular organisms	1	100
Oscarella lobularis	Osclob_v00_mik.OX382150.1G1797.1	cellular organisms	1	100
Oscarella lobularis	Osclob_v00_mik.OX382150.1G1798.1	cellular organisms	1	100
Oscarella lobularis	Osclob_v00_mik.OX382150.1G1799.1	Oscarella lobularis	7	100
Oscarella lobularis	Osclob_v00_mik.OX382150.1G1800.1	cellular organisms	1	100
Oscarella lobularis	Osclob_v00_mik.OX382150.1G1801.2	cellular organisms	1	100
Oscarella lobularis	Osclob_v00_mik.OX382150.1G180.1	cellular organisms	1	100
Oscarella lobularis	Osclob_v00_mik.OX382150.1G1802.1	cellular organisms	1	100
Oscarella lobularis	Osclob_v00_mik.OX382150.1G1803.1	cellular organisms	1	100
Oscarella lobularis	Osclob_v00_mik.OX382150.1G1804.1	Eukaryota	2	100
Oscarella lobularis	Osclob_v00_mik.OX382150.1G1805.1	Oscarella lobularis	7	100
Oscarella lobularis	Osclob_v00_mik.OX382150.1G1806.1	Oscarella lobularis	7	100
Oscarella lobularis	Osclob_v00_mik.OX382150.1G1807.1	Oscarella lobularis	7	100
Oscarella lobularis	Osclob_v00_mik.OX382150.1G1808.1	Homosclerophorida	6	100
Oscarella lobularis	Osclob_v00_mik.OX382150.1G1809.1	Oscarella lobularis	7	100
Oscarella lobularis	Osclob_v00_mik.OX382150.1G1810.1	cellular organisms	1	100
Oscarella lobularis	Osclob_v00_mik.OX382150.1G1811.1	cellular organisms	1	83
Oscarella lobularis	Osclob_v00_mik.OX382150.1G181.1	Eukaryota	2	100
Oscarella lobularis	Osclob_v00_mik.OX382150.1G1814.1	cellular organisms	1	100
Oscarella lobularis	Osclob_v00_mik.OX382150.1G1815.1	Oscarella lobularis	7	100
Oscarella lobularis	Osclob_v00_mik.OX382150.1G1816.1	cellular organisms	1	100
Oscarella lobularis	Osclob_v00_mik.OX382150.1G1817.1	cellular organisms	1	100
Oscarella lobularis	Osclob_v00_mik.OX382150.1G1818.1	Oscarella lobularis	7	100
Oscarella lobularis	Osclob_v00_mik.OX382150.1G1819.1	Eukaryota	2	80
Oscarella lobularis	Osclob_v00_mik.OX382150.1G18.1	cellular organisms	1	100
Oscarella lobularis	Osclob_v00_mik.OX382150.1G1820.1	Eukaryota	2	100
Oscarella lobularis	Osclob_v00_mik.OX382150.1G1821.1	cellular organisms	1	100
Oscarella lobularis	Osclob_v00_mik.OX382150.1G182.1	Eukaryota	2	100
Oscarella lobularis	Osclob_v00_mik.OX382150.1G1823.1	cellular organisms	1	100
Oscarella lobularis	Osclob_v00_mik.OX382150.1G1824.1	Oscarella lobularis	7	100
Oscarella lobularis	Osclob_v00_mik.OX382150.1G1825.1	Eukaryota	2	100
Oscarella lobularis	Osclob_v00_mik.OX382150.1G1826.1	Oscarella lobularis	7	100
Oscarella lobularis	Osclob_v00_mik.OX382150.1G1827.1	Oscarella lobularis	7	100
Oscarella lobularis	Osclob_v00_mik.OX382150.1G1828.1	Metazoa	4	100
Oscarella lobularis	Osclob_v00_mik.OX382150.1G1830.1	Metazoa	4	66
Oscarella lobularis	Osclob_v00_mik.OX382150.1G1831.1	cellular organisms	1	83
Oscarella lobularis	Osclob_v00_mik.OX382150.1G183.1	Metazoa	4	100
Oscarella lobularis	Osclob_v00_mik.OX382150.1G1832.1	cellular organisms	1	100
Oscarella lobularis	Osclob_v00_mik.OX382150.1G1833.1	Metazoa	4	66
Oscarella lobularis	Osclob_v00_mik.OX382150.1G1834.1	Oscarella lobularis	7	100
Oscarella lobularis	Osclob_v00_mik.OX382150.1G1835.1	Oscarella lobularis	7	100
Oscarella lobularis	Osclob_v00_mik.OX382150.1G1836.1	Oscarella lobularis	7	100
Oscarella lobularis	Osclob_v00_mik.OX382150.1G1838.1	Oscarella lobularis	7	100
Oscarella lobularis	Osclob_v00_mik.OX382150.1G1839.1	cellular organisms	1	100
Oscarella lobularis	Osclob_v00_mik.OX382150.1G1840.1	Oscarella lobularis	7	100
Oscarella lobularis	Osclob_v00_mik.OX382150.1G1841.1	cellular organisms	1	100
Oscarella lobularis	Osclob_v00_mik.OX382150.1G184.1	cellular organisms	1	100
Oscarella lobularis	Osclob_v00_mik.OX382150.1G1842.1	Oscarella lobularis	7	100
Oscarella lobularis	Osclob_v00_mik.OX382150.1G1843.1	Homosclerophorida	6	100
Oscarella lobularis	Osclob_v00_mik.OX382150.1G1844.1	cellular organisms	1	100
Oscarella lobularis	Osclob_v00_mik.OX382150.1G1845.1	cellular organisms	1	100
Oscarella lobularis	Osclob_v00_mik.OX382150.1G1846.2	Homosclerophorida	6	100
Oscarella lobularis	Osclob_v00_mik.OX382150.1G1847.2	cellular organisms	1	66
Oscarella lobularis	Osclob_v00_mik.OX382150.1G1848.1	Metazoa	4	100
Oscarella lobularis	Osclob_v00_mik.OX382150.1G1850.1	cellular organisms	1	100
Oscarella lobularis	Osclob_v00_mik.OX382150.1G1851.1	cellular organisms	1	100
Oscarella lobularis	Osclob_v00_mik.OX382150.1G185.1	Homosclerophorida	6	100
Oscarella lobularis	Osclob_v00_mik.OX382150.1G1852.1	cellular organisms	1	100
Oscarella lobularis	Osclob_v00_mik.OX382150.1G1853.1	Oscarella lobularis	7	100
Oscarella lobularis	Osclob_v00_mik.OX382150.1G1854.1	cellular organisms	1	83
Oscarella lobularis	Osclob_v00_mik.OX382150.1G1855.1	cellular organisms	1	83
Oscarella lobularis	Osclob_v00_mik.OX382150.1G1856.1	Oscarella lobularis	7	100
Oscarella lobularis	Osclob_v00_mik.OX382150.1G1857.1	Metazoa	4	66
Oscarella lobularis	Osclob_v00_mik.OX382150.1G1858.1	cellular organisms	1	83
Oscarella lobularis	Osclob_v00_mik.OX382150.1G1859.1	cellular organisms	1	100
Oscarella lobularis	Osclob_v00_mik.OX382150.1G1860.1	cellular organisms	1	100
Oscarella lobularis	Osclob_v00_mik.OX382150.1G186.1	Oscarella lobularis	7	100
Oscarella lobularis	Osclob_v00_mik.OX382150.1G1862.1	cellular organisms	1	100
Oscarella lobularis	Osclob_v00_mik.OX382150.1G1863.1	cellular organisms	1	100
Oscarella lobularis	Osclob_v00_mik.OX382150.1G1864.1	Metazoa	4	100
Oscarella lobularis	Osclob_v00_mik.OX382150.1G1865.1	cellular organisms	1	100
Oscarella lobularis	Osclob_v00_mik.OX382150.1G1866.1	cellular organisms	1	83
Oscarella lobularis	Osclob_v00_mik.OX382150.1G1867.1	Oscarella lobularis	7	100
Oscarella lobularis	Osclob_v00_mik.OX382150.1G1868.1	cellular organisms	1	100
Oscarella lobularis	Osclob_v00_mik.OX382150.1G1869.1	cellular organisms	1	100
Oscarella lobularis	Osclob_v00_mik.OX382150.1G1871.1	Metazoa	4	33
Oscarella lobularis	Osclob_v00_mik.OX382150.1G187.1	Oscarella lobularis	7	100
Oscarella lobularis	Osclob_v00_mik.OX382150.1G1872.1	cellular organisms	1	83
Oscarella lobularis	Osclob_v00_mik.OX382150.1G1873.1	cellular organisms	1	83
Oscarella lobularis	Osclob_v00_mik.OX382150.1G1874.1	Eukaryota	2	80
Oscarella lobularis	Osclob_v00_mik.OX382150.1G1875.1	cellular organisms	1	100
Oscarella lobularis	Osclob_v00_mik.OX382150.1G1876.1	Oscarella lobularis	7	100
Oscarella lobularis	Osclob_v00_mik.OX382150.1G1877.1	cellular organisms	1	100
Oscarella lobularis	Osclob_v00_mik.OX382150.1G1878.1	Oscarella lobularis	7	100
Oscarella lobularis	Osclob_v00_mik.OX382150.1G1879.1	Oscarella lobularis	7	100
Oscarella lobularis	Osclob_v00_mik.OX382150.1G1880.1	cellular organisms	1	83
Oscarella lobularis	Osclob_v00_mik.OX382150.1G1881.1	cellular organisms	1	50
Oscarella lobularis	Osclob_v00_mik.OX382150.1G188.1	cellular organisms	1	100
Oscarella lobularis	Osclob_v00_mik.OX382150.1G1882.1	cellular organisms	1	83
Oscarella lobularis	Osclob_v00_mik.OX382150.1G1883.1	Oscarella lobularis	7	100
Oscarella lobularis	Osclob_v00_mik.OX382150.1G1884.1	cellular organisms	1	100
Oscarella lobularis	Osclob_v00_mik.OX382150.1G1885.1	cellular organisms	1	100
Oscarella lobularis	Osclob_v00_mik.OX382150.1G1886.1	Eukaryota	2	80
Oscarella lobularis	Osclob_v00_mik.OX382150.1G1889.2	Oscarella lobularis	7	100
Oscarella lobularis	Osclob_v00_mik.OX382150.1G1890.1	Oscarella lobularis	7	100
Oscarella lobularis	Osclob_v00_mik.OX382150.1G1891.1	Oscarella lobularis	7	100
Oscarella lobularis	Osclob_v00_mik.OX382150.1G189.1	cellular organisms	1	100
Oscarella lobularis	Osclob_v00_mik.OX382150.1G1892.1	cellular organisms	1	100
Oscarella lobularis	Osclob_v00_mik.OX382150.1G1893.1	Oscarella lobularis	7	100
Oscarella lobularis	Osclob_v00_mik.OX382150.1G1894.1	Oscarella lobularis	7	100
Oscarella lobularis	Osclob_v00_mik.OX382150.1G1895.1	Oscarella lobularis	7	100
Oscarella lobularis	Osclob_v00_mik.OX382150.1G1897.1	cellular organisms	1	100
Oscarella lobularis	Osclob_v00_mik.OX382150.1G1898.1	Oscarella lobularis	7	100
Oscarella lobularis	Osclob_v00_mik.OX382150.1G1899.1	Oscarella lobularis	7	100
Oscarella lobularis	Osclob_v00_mik.OX382150.1G1900.1	Porifera	5	50
Oscarella lobularis	Osclob_v00_mik.OX382150.1G190.1	Eukaryota	2	100
Oscarella lobularis	Osclob_v00_mik.OX382150.1G1902.1	Porifera	5	50
Oscarella lobularis	Osclob_v00_mik.OX382150.1G1907.1	Oscarella lobularis	7	100
Oscarella lobularis	Osclob_v00_mik.OX382150.1G1908.1	cellular organisms	1	100
Oscarella lobularis	Osclob_v00_mik.OX382150.1G1909.1	cellular organisms	1	100
Oscarella lobularis	Osclob_v00_mik.OX382150.1G1910.1	Homosclerophorida	6	100
Oscarella lobularis	Osclob_v00_mik.OX382150.1G1911.1	Porifera	5	100
Oscarella lobularis	Osclob_v00_mik.OX382150.1G191.1	cellular organisms	1	100
Oscarella lobularis	Osclob_v00_mik.OX382150.1G1913.1	Oscarella lobularis	7	100
Oscarella lobularis	Osclob_v00_mik.OX382150.1G1914.1	cellular organisms	1	100
Oscarella lobularis	Osclob_v00_mik.OX382150.1G1915.1	Oscarella lobularis	7	100
Oscarella lobularis	Osclob_v00_mik.OX382150.1G1916.1	Metazoa	4	100
Oscarella lobularis	Osclob_v00_mik.OX382150.1G1918.1	Metazoa	4	66
Oscarella lobularis	Osclob_v00_mik.OX382150.1G1919.1	Oscarella lobularis	7	100
Oscarella lobularis	Osclob_v00_mik.OX382150.1G19.1	cellular organisms	1	100
Oscarella lobularis	Osclob_v00_mik.OX382150.1G1920.1	cellular organisms	1	100
Oscarella lobularis	Osclob_v00_mik.OX382150.1G1921.1	Metazoa	4	100
Oscarella lobularis	Osclob_v00_mik.OX382150.1G192.1	Eukaryota	2	100
Oscarella lobularis	Osclob_v00_mik.OX382150.1G1922.1	cellular organisms	1	83
Oscarella lobularis	Osclob_v00_mik.OX382150.1G1923.1	Eukaryota	2	80
Oscarella lobularis	Osclob_v00_mik.OX382150.1G1926.1	cellular organisms	1	83
Oscarella lobularis	Osclob_v00_mik.OX382150.1G1927.1	Oscarella lobularis	7	100
Oscarella lobularis	Osclob_v00_mik.OX382150.1G1928.1	Eukaryota	2	100
Oscarella lobularis	Osclob_v00_mik.OX382150.1G1930.1	cellular organisms	1	83
Oscarella lobularis	Osclob_v00_mik.OX382150.1G1931.1	Metazoa	4	33
Oscarella lobularis	Osclob_v00_mik.OX382150.1G193.1	cellular organisms	1	100
Oscarella lobularis	Osclob_v00_mik.OX382150.1G1932.1	Eukaryota	2	80
Oscarella lobularis	Osclob_v00_mik.OX382150.1G1933.1	Eukaryota	2	100
Oscarella lobularis	Osclob_v00_mik.OX382150.1G1934.1	cellular organisms	1	83
Oscarella lobularis	Osclob_v00_mik.OX382150.1G1935.1	cellular organisms	1	100
Oscarella lobularis	Osclob_v00_mik.OX382150.1G1936.1	Oscarella lobularis	7	100
Oscarella lobularis	Osclob_v00_mik.OX382150.1G1937.1	cellular organisms	1	83
Oscarella lobularis	Osclob_v00_mik.OX382150.1G1938.1	cellular organisms	1	100
Oscarella lobularis	Osclob_v00_mik.OX382150.1G1939.1	Oscarella lobularis	7	100
Oscarella lobularis	Osclob_v00_mik.OX382150.1G1941.1	Eukaryota	2	100
Oscarella lobularis	Osclob_v00_mik.OX382150.1G194.1	Eukaryota	2	100
Oscarella lobularis	Osclob_v00_mik.OX382150.1G1942.1	cellular organisms	1	66
Oscarella lobularis	Osclob_v00_mik.OX382150.1G1943.1	cellular organisms	1	100
Oscarella lobularis	Osclob_v00_mik.OX382150.1G1944.1	cellular organisms	1	100
Oscarella lobularis	Osclob_v00_mik.OX382150.1G1945.1	Metazoa	4	100
Oscarella lobularis	Osclob_v00_mik.OX382150.1G1948.2	cellular organisms	1	100
Oscarella lobularis	Osclob_v00_mik.OX382150.1G1949.1	Metazoa	4	100
Oscarella lobularis	Osclob_v00_mik.OX382150.1G1950.1	Oscarella lobularis	7	100
Oscarella lobularis	Osclob_v00_mik.OX382150.1G1951.1	Metazoa	4	100
Oscarella lobularis	Osclob_v00_mik.OX382150.1G1952.1	Metazoa	4	100
Oscarella lobularis	Osclob_v00_mik.OX382150.1G195.2	cellular organisms	1	100
Oscarella lobularis	Osclob_v00_mik.OX382150.1G1954.1	cellular organisms	1	100
Oscarella lobularis	Osclob_v00_mik.OX382150.1G1959.1	cellular organisms	1	100
Oscarella lobularis	Osclob_v00_mik.OX382150.1G1960.1	cellular organisms	1	100
Oscarella lobularis	Osclob_v00_mik.OX382150.1G1961.1	cellular organisms	1	100
Oscarella lobularis	Osclob_v00_mik.OX382150.1G196.1	Eukaryota	2	80
Oscarella lobularis	Osclob_v00_mik.OX382150.1G1962.1	Homosclerophorida	6	100
Oscarella lobularis	Osclob_v00_mik.OX382150.1G1965.1	Oscarella lobularis	7	100
Oscarella lobularis	Osclob_v00_mik.OX382150.1G1966.1	Oscarella lobularis	7	100
Oscarella lobularis	Osclob_v00_mik.OX382150.1G1967.1	Oscarella lobularis	7	100
Oscarella lobularis	Osclob_v00_mik.OX382150.1G1968.1	Oscarella lobularis	7	100
Oscarella lobularis	Osclob_v00_mik.OX382150.1G1969.1	Homosclerophorida	6	100
Oscarella lobularis	Osclob_v00_mik.OX382150.1G1970.1	cellular organisms	1	100
Oscarella lobularis	Osclob_v00_mik.OX382150.1G1971.1	cellular organisms	1	100
Oscarella lobularis	Osclob_v00_mik.OX382150.1G197.1	cellular organisms	1	100
Oscarella lobularis	Osclob_v00_mik.OX382150.1G1972.1	cellular organisms	1	100
Oscarella lobularis	Osclob_v00_mik.OX382150.1G1973.2	Metazoa	4	100
Oscarella lobularis	Osclob_v00_mik.OX382150.1G1977.1	cellular organisms	1	100
Oscarella lobularis	Osclob_v00_mik.OX382150.1G1980.2	Metazoa	4	100
Oscarella lobularis	Osclob_v00_mik.OX382150.1G198.1	Metazoa	4	100
Oscarella lobularis	Osclob_v00_mik.OX382150.1G1983.1	Oscarella lobularis	7	100
Oscarella lobularis	Osclob_v00_mik.OX382150.1G1985.1	Oscarella lobularis	7	100
Oscarella lobularis	Osclob_v00_mik.OX382150.1G1989.2	cellular organisms	1	100
Oscarella lobularis	Osclob_v00_mik.OX382150.1G1990.1	Oscarella lobularis	7	100
Oscarella lobularis	Osclob_v00_mik.OX382150.1G199.1	Metazoa	4	66
Oscarella lobularis	Osclob_v00_mik.OX382150.1G1994.1	cellular organisms	1	100
Oscarella lobularis	Osclob_v00_mik.OX382150.1G1996.1	cellular organisms	1	100
Oscarella lobularis	Osclob_v00_mik.OX382150.1G1999.1	cellular organisms	1	100
Oscarella lobularis	Osclob_v00_mik.OX382150.1G2001.1	Oscarella lobularis	7	100
Oscarella lobularis	Osclob_v00_mik.OX382150.1G200.1	cellular organisms	1	100
Oscarella lobularis	Osclob_v00_mik.OX382150.1G2005.1	Oscarella lobularis	7	100
Oscarella lobularis	Osclob_v00_mik.OX382150.1G2007.1	Oscarella lobularis	7	100
Oscarella lobularis	Osclob_v00_mik.OX382150.1G2008.1	cellular organisms	1	100
Oscarella lobularis	Osclob_v00_mik.OX382150.1G2009.1	Oscarella lobularis	7	100
Oscarella lobularis	Osclob_v00_mik.OX382150.1G2010.1	Oscarella lobularis	7	100
Oscarella lobularis	Osclob_v00_mik.OX382150.1G201.1	cellular organisms	1	100
Oscarella lobularis	Osclob_v00_mik.OX382150.1G2012.1	Metazoa	4	66
Oscarella lobularis	Osclob_v00_mik.OX382150.1G2013.1	Oscarella lobularis	7	100
Oscarella lobularis	Osclob_v00_mik.OX382150.1G2015.1	Oscarella lobularis	7	100
Oscarella lobularis	Osclob_v00_mik.OX382150.1G2016.1	Oscarella lobularis	7	100
Oscarella lobularis	Osclob_v00_mik.OX382150.1G2017.1	cellular organisms	1	100
Oscarella lobularis	Osclob_v00_mik.OX382150.1G2018.1	Oscarella lobularis	7	100
Oscarella lobularis	Osclob_v00_mik.OX382150.1G2019.1	Eukaryota	2	100
Oscarella lobularis	Osclob_v00_mik.OX382150.1G2020.1	Oscarella lobularis	7	100
Oscarella lobularis	Osclob_v00_mik.OX382150.1G2021.1	Oscarella lobularis	7	100
Oscarella lobularis	Osclob_v00_mik.OX382150.1G202.1	Metazoa	4	100
Oscarella lobularis	Osclob_v00_mik.OX382150.1G2022.1	cellular organisms	1	100
Oscarella lobularis	Osclob_v00_mik.OX382150.1G2023.1	Metazoa	4	66
Oscarella lobularis	Osclob_v00_mik.OX382150.1G2024.1	Oscarella lobularis	7	100
Oscarella lobularis	Osclob_v00_mik.OX382150.1G2025.1	Oscarella lobularis	7	100
Oscarella lobularis	Osclob_v00_mik.OX382150.1G2026.1	Oscarella lobularis	7	100
Oscarella lobularis	Osclob_v00_mik.OX382150.1G2029.1	Oscarella lobularis	7	100
Oscarella lobularis	Osclob_v00_mik.OX382150.1G2030.1	Oscarella lobularis	7	100
Oscarella lobularis	Osclob_v00_mik.OX382150.1G2031.1	Oscarella lobularis	7	100
Oscarella lobularis	Osclob_v00_mik.OX382150.1G203.1	cellular organisms	1	100
Oscarella lobularis	Osclob_v00_mik.OX382150.1G2032.1	Oscarella lobularis	7	100
Oscarella lobularis	Osclob_v00_mik.OX382150.1G2033.1	Metazoa	4	66
Oscarella lobularis	Osclob_v00_mik.OX382150.1G2034.1	Oscarella lobularis	7	100
Oscarella lobularis	Osclob_v00_mik.OX382150.1G2036.1	cellular organisms	1	100
Oscarella lobularis	Osclob_v00_mik.OX382150.1G2037.1	Oscarella lobularis	7	100
Oscarella lobularis	Osclob_v00_mik.OX382150.1G2038.1	cellular organisms	1	100
Oscarella lobularis	Osclob_v00_mik.OX382150.1G2039.1	cellular organisms	1	66
Oscarella lobularis	Osclob_v00_mik.OX382150.1G204.1	Eukaryota	2	100
Oscarella lobularis	Osclob_v00_mik.OX382150.1G2042.1	Eukaryota	2	60
Oscarella lobularis	Osclob_v00_mik.OX382150.1G2043.1	Eukaryota	2	60
Oscarella lobularis	Osclob_v00_mik.OX382150.1G2044.1	Oscarella lobularis	7	100
Oscarella lobularis	Osclob_v00_mik.OX382150.1G2045.1	Oscarella lobularis	7	100
Oscarella lobularis	Osclob_v00_mik.OX382150.1G2046.1	Oscarella lobularis	7	100
Oscarella lobularis	Osclob_v00_mik.OX382150.1G2047.1	Oscarella lobularis	7	100
Oscarella lobularis	Osclob_v00_mik.OX382150.1G2050.1	cellular organisms	1	100
Oscarella lobularis	Osclob_v00_mik.OX382150.1G2051.1	cellular organisms	1	100
Oscarella lobularis	Osclob_v00_mik.OX382150.1G205.1	cellular organisms	1	100
Oscarella lobularis	Osclob_v00_mik.OX382150.1G2052.1	cellular organisms	1	100
Oscarella lobularis	Osclob_v00_mik.OX382150.1G2053.1	Porifera	5	100
Oscarella lobularis	Osclob_v00_mik.OX382150.1G2054.1	cellular organisms	1	100
Oscarella lobularis	Osclob_v00_mik.OX382150.1G2055.1	Metazoa	4	100
Oscarella lobularis	Osclob_v00_mik.OX382150.1G2056.1	Opisthokonta	3	100
Oscarella lobularis	Osclob_v00_mik.OX382150.1G2057.1	Oscarella lobularis	7	100
Oscarella lobularis	Osclob_v00_mik.OX382150.1G2058.1	Oscarella lobularis	7	100
Oscarella lobularis	Osclob_v00_mik.OX382150.1G2059.1	Oscarella lobularis	7	100
Oscarella lobularis	Osclob_v00_mik.OX382150.1G2061.1	cellular organisms	1	100
Oscarella lobularis	Osclob_v00_mik.OX382150.1G206.1	cellular organisms	1	100
Oscarella lobularis	Osclob_v00_mik.OX382150.1G2062.1	cellular organisms	1	83
Oscarella lobularis	Osclob_v00_mik.OX382150.1G2063.1	Oscarella lobularis	7	100
Oscarella lobularis	Osclob_v00_mik.OX382150.1G2064.1	cellular organisms	1	100
Oscarella lobularis	Osclob_v00_mik.OX382150.1G2066.1	cellular organisms	1	100
Oscarella lobularis	Osclob_v00_mik.OX382150.1G2067.1	cellular organisms	1	100
Oscarella lobularis	Osclob_v00_mik.OX382150.1G2068.1	cellular organisms	1	100
Oscarella lobularis	Osclob_v00_mik.OX382150.1G2069.1	Eukaryota	2	80
Oscarella lobularis	Osclob_v00_mik.OX382150.1G2070.1	Oscarella lobularis	7	100
Oscarella lobularis	Osclob_v00_mik.OX382150.1G2071.1	Oscarella lobularis	7	100
Oscarella lobularis	Osclob_v00_mik.OX382150.1G207.1	Oscarella lobularis	7	100
Oscarella lobularis	Osclob_v00_mik.OX382150.1G2072.1	Oscarella lobularis	7	100
Oscarella lobularis	Osclob_v00_mik.OX382150.1G2073.1	cellular organisms	1	100
Oscarella lobularis	Osclob_v00_mik.OX382150.1G2074.1	cellular organisms	1	100
Oscarella lobularis	Osclob_v00_mik.OX382150.1G2075.1	cellular organisms	1	50
Oscarella lobularis	Osclob_v00_mik.OX382150.1G2076.1	cellular organisms	1	50
Oscarella lobularis	Osclob_v00_mik.OX382150.1G2077.1	cellular organisms	1	50
Oscarella lobularis	Osclob_v00_mik.OX382150.1G2078.1	cellular organisms	1	100
Oscarella lobularis	Osclob_v00_mik.OX382150.1G2079.1	cellular organisms	1	100
Oscarella lobularis	Osclob_v00_mik.OX382150.1G2080.1	Eukaryota	2	80
Oscarella lobularis	Osclob_v00_mik.OX382150.1G208.1	cellular organisms	1	100
Oscarella lobularis	Osclob_v00_mik.OX382150.1G2082.1	cellular organisms	1	83
Oscarella lobularis	Osclob_v00_mik.OX382150.1G2083.1	Oscarella lobularis	7	100
Oscarella lobularis	Osclob_v00_mik.OX382150.1G2084.1	Eukaryota	2	100
Oscarella lobularis	Osclob_v00_mik.OX382150.1G2085.1	Oscarella lobularis	7	100
Oscarella lobularis	Osclob_v00_mik.OX382150.1G2086.1	cellular organisms	1	100
Oscarella lobularis	Osclob_v00_mik.OX382150.1G2087.1	cellular organisms	1	100
Oscarella lobularis	Osclob_v00_mik.OX382150.1G2088.1	Oscarella lobularis	7	100
Oscarella lobularis	Osclob_v00_mik.OX382150.1G2089.1	cellular organisms	1	100
Oscarella lobularis	Osclob_v00_mik.OX382150.1G2090.1	Oscarella lobularis	7	100
Oscarella lobularis	Osclob_v00_mik.OX382150.1G2091.1	Oscarella lobularis	7	100
Oscarella lobularis	Osclob_v00_mik.OX382150.1G209.1	cellular organisms	1	100
Oscarella lobularis	Osclob_v00_mik.OX382150.1G2092.2	cellular organisms	1	100
Oscarella lobularis	Osclob_v00_mik.OX382150.1G2093.2	cellular organisms	1	50
Oscarella lobularis	Osclob_v00_mik.OX382150.1G2095.1	Oscarella lobularis	7	100
Oscarella lobularis	Osclob_v00_mik.OX382150.1G2096.1	cellular organisms	1	100
Oscarella lobularis	Osclob_v00_mik.OX382150.1G2097.1	cellular organisms	1	100
Oscarella lobularis	Osclob_v00_mik.OX382150.1G2098.1	cellular organisms	1	100
Oscarella lobularis	Osclob_v00_mik.OX382150.1G2099.1	cellular organisms	1	100
Oscarella lobularis	Osclob_v00_mik.OX382150.1G2101.1	cellular organisms	1	100
Oscarella lobularis	Osclob_v00_mik.OX382150.1G210.1	Eukaryota	2	80
Oscarella lobularis	Osclob_v00_mik.OX382150.1G2102.1	Oscarella lobularis	7	100
Oscarella lobularis	Osclob_v00_mik.OX382150.1G2103.1	cellular organisms	1	100
Oscarella lobularis	Osclob_v00_mik.OX382150.1G2104.1	cellular organisms	1	100
Oscarella lobularis	Osclob_v00_mik.OX382150.1G2105.1	Oscarella lobularis	7	100
Oscarella lobularis	Osclob_v00_mik.OX382150.1G2106.1	cellular organisms	1	100
Oscarella lobularis	Osclob_v00_mik.OX382150.1G2107.1	cellular organisms	1	83
Oscarella lobularis	Osclob_v00_mik.OX382150.1G2108.1	Oscarella lobularis	7	100
Oscarella lobularis	Osclob_v00_mik.OX382150.1G2109.1	Oscarella lobularis	7	100
Oscarella lobularis	Osclob_v00_mik.OX382150.1G2110.1	Oscarella lobularis	7	100
Oscarella lobularis	Osclob_v00_mik.OX382150.1G2111.1	Oscarella lobularis	7	100
Oscarella lobularis	Osclob_v00_mik.OX382150.1G211.2	Eukaryota	2	100
Oscarella lobularis	Osclob_v00_mik.OX382150.1G2114.1	Oscarella lobularis	7	100
Oscarella lobularis	Osclob_v00_mik.OX382150.1G2115.1	Oscarella lobularis	7	100
Oscarella lobularis	Osclob_v00_mik.OX382150.1G2116.1	cellular organisms	1	100
Oscarella lobularis	Osclob_v00_mik.OX382150.1G2117.1	Oscarella lobularis	7	100
Oscarella lobularis	Osclob_v00_mik.OX382150.1G2118.1	Oscarella lobularis	7	100
Oscarella lobularis	Osclob_v00_mik.OX382150.1G2119.1	Oscarella lobularis	7	100
Oscarella lobularis	Osclob_v00_mik.OX382150.1G2120.1	Oscarella lobularis	7	100
Oscarella lobularis	Osclob_v00_mik.OX382150.1G2121.1	Oscarella lobularis	7	100
Oscarella lobularis	Osclob_v00_mik.OX382150.1G212.1	Oscarella lobularis	7	100
Oscarella lobularis	Osclob_v00_mik.OX382150.1G2122.1	cellular organisms	1	100
Oscarella lobularis	Osclob_v00_mik.OX382150.1G2124.1	cellular organisms	1	100
Oscarella lobularis	Osclob_v00_mik.OX382150.1G2126.1	Oscarella lobularis	7	100
Oscarella lobularis	Osclob_v00_mik.OX382150.1G2127.1	Oscarella lobularis	7	100
Oscarella lobularis	Osclob_v00_mik.OX382150.1G2128.1	cellular organisms	1	100
Oscarella lobularis	Osclob_v00_mik.OX382150.1G2129.1	Oscarella lobularis	7	100
Oscarella lobularis	Osclob_v00_mik.OX382150.1G21.2	cellular organisms	1	100
Oscarella lobularis	Osclob_v00_mik.OX382150.1G2130.1	cellular organisms	1	100
Oscarella lobularis	Osclob_v00_mik.OX382150.1G213.1	Eukaryota	2	100
Oscarella lobularis	Osclob_v00_mik.OX382150.1G2132.1	Oscarella lobularis	7	100
Oscarella lobularis	Osclob_v00_mik.OX382150.1G2133.1	Oscarella lobularis	7	100
Oscarella lobularis	Osclob_v00_mik.OX382150.1G2134.1	cellular organisms	1	83
Oscarella lobularis	Osclob_v00_mik.OX382150.1G2135.1	Oscarella lobularis	7	100
Oscarella lobularis	Osclob_v00_mik.OX382150.1G2136.1	Oscarella lobularis	7	100
Oscarella lobularis	Osclob_v00_mik.OX382150.1G2137.2	cellular organisms	1	100
Oscarella lobularis	Osclob_v00_mik.OX382150.1G2138.1	cellular organisms	1	100
Oscarella lobularis	Osclob_v00_mik.OX382150.1G2139.1	Homosclerophorida	6	100
Oscarella lobularis	Osclob_v00_mik.OX382150.1G2140.1	Oscarella lobularis	7	100
Oscarella lobularis	Osclob_v00_mik.OX382150.1G2141.2	Homosclerophorida	6	100
Oscarella lobularis	Osclob_v00_mik.OX382150.1G214.1	Oscarella lobularis	7	100
Oscarella lobularis	Osclob_v00_mik.OX382150.1G2143.1	Homosclerophorida	6	100
Oscarella lobularis	Osclob_v00_mik.OX382150.1G2144.1	cellular organisms	1	100
Oscarella lobularis	Osclob_v00_mik.OX382150.1G2146.1	Oscarella lobularis	7	100
Oscarella lobularis	Osclob_v00_mik.OX382150.1G2147.1	Oscarella lobularis	7	100
Oscarella lobularis	Osclob_v00_mik.OX382150.1G2148.1	Oscarella lobularis	7	100
Oscarella lobularis	Osclob_v00_mik.OX382150.1G215.1	Eukaryota	2	100
Oscarella lobularis	Osclob_v00_mik.OX382150.1G2152.2	Homosclerophorida	6	100
Oscarella lobularis	Osclob_v00_mik.OX382150.1G2153.2	cellular organisms	1	100
Oscarella lobularis	Osclob_v00_mik.OX382150.1G2155.1	Oscarella lobularis	7	100
Oscarella lobularis	Osclob_v00_mik.OX382150.1G2156.1	Oscarella lobularis	7	100
Oscarella lobularis	Osclob_v00_mik.OX382150.1G2157.1	Oscarella lobularis	7	100
Oscarella lobularis	Osclob_v00_mik.OX382150.1G2158.2	cellular organisms	1	66
Oscarella lobularis	Osclob_v00_mik.OX382150.1G2159.1	Oscarella lobularis	7	100
Oscarella lobularis	Osclob_v00_mik.OX382150.1G2160.1	Opisthokonta	3	100
Oscarella lobularis	Osclob_v00_mik.OX382150.1G2161.1	cellular organisms	1	100
Oscarella lobularis	Osclob_v00_mik.OX382150.1G216.1	Oscarella lobularis	7	100
Oscarella lobularis	Osclob_v00_mik.OX382150.1G2162.1	Oscarella lobularis	7	100
Oscarella lobularis	Osclob_v00_mik.OX382150.1G2163.1	cellular organisms	1	100
Oscarella lobularis	Osclob_v00_mik.OX382150.1G2164.1	Oscarella lobularis	7	100
Oscarella lobularis	Osclob_v00_mik.OX382150.1G2166.2	cellular organisms	1	100
Oscarella lobularis	Osclob_v00_mik.OX382150.1G2167.1	cellular organisms	1	66
Oscarella lobularis	Osclob_v00_mik.OX382150.1G2169.1	Oscarella lobularis	7	100
Oscarella lobularis	Osclob_v00_mik.OX382150.1G2170.1	Oscarella lobularis	7	100
Oscarella lobularis	Osclob_v00_mik.OX382150.1G2171.1	Porifera	5	50
Oscarella lobularis	Osclob_v00_mik.OX382150.1G217.1	cellular organisms	1	100
Oscarella lobularis	Osclob_v00_mik.OX382150.1G2172.1	cellular organisms	1	100
Oscarella lobularis	Osclob_v00_mik.OX382150.1G2174.1	cellular organisms	1	100
Oscarella lobularis	Osclob_v00_mik.OX382150.1G2175.1	Oscarella lobularis	7	100
Oscarella lobularis	Osclob_v00_mik.OX382150.1G2176.1	Oscarella lobularis	7	100
Oscarella lobularis	Osclob_v00_mik.OX382150.1G2178.1	Oscarella lobularis	7	100
Oscarella lobularis	Osclob_v00_mik.OX382150.1G2179.1	cellular organisms	1	100
Oscarella lobularis	Osclob_v00_mik.OX382150.1G2180.1	cellular organisms	1	100
Oscarella lobularis	Osclob_v00_mik.OX382150.1G2181.1	Eukaryota	2	100
Oscarella lobularis	Osclob_v00_mik.OX382150.1G218.1	Metazoa	4	100
Oscarella lobularis	Osclob_v00_mik.OX382150.1G2183.1	Oscarella lobularis	7	100
Oscarella lobularis	Osclob_v00_mik.OX382150.1G2184.1	Oscarella lobularis	7	100
Oscarella lobularis	Osclob_v00_mik.OX382150.1G2185.1	cellular organisms	1	100
Oscarella lobularis	Osclob_v00_mik.OX382150.1G2186.1	Oscarella lobularis	7	100
Oscarella lobularis	Osclob_v00_mik.OX382150.1G2187.1	Oscarella lobularis	7	100
Oscarella lobularis	Osclob_v00_mik.OX382150.1G2189.1	cellular organisms	1	100
Oscarella lobularis	Osclob_v00_mik.OX382150.1G2190.1	cellular organisms	1	100
Oscarella lobularis	Osclob_v00_mik.OX382150.1G2191.1	cellular organisms	1	100
Oscarella lobularis	Osclob_v00_mik.OX382150.1G219.1	Eukaryota	2	100
Oscarella lobularis	Osclob_v00_mik.OX382150.1G2192.1	Oscarella lobularis	7	100
Oscarella lobularis	Osclob_v00_mik.OX382150.1G2.1	cellular organisms	1	100
Oscarella lobularis	Osclob_v00_mik.OX382150.1G220.1	Eukaryota	2	100
Oscarella lobularis	Osclob_v00_mik.OX382150.1G22.1	cellular organisms	1	100
Oscarella lobularis	Osclob_v00_mik.OX382150.1G222.1	Eukaryota	2	100
Oscarella lobularis	Osclob_v00_mik.OX382150.1G223.1	Oscarella lobularis	7	100
Oscarella lobularis	Osclob_v00_mik.OX382150.1G224.1	Oscarella lobularis	7	100
Oscarella lobularis	Osclob_v00_mik.OX382150.1G225.1	cellular organisms	1	100
Oscarella lobularis	Osclob_v00_mik.OX382150.1G226.1	Opisthokonta	3	100
Oscarella lobularis	Osclob_v00_mik.OX382150.1G227.1	cellular organisms	1	100
Oscarella lobularis	Osclob_v00_mik.OX382150.1G228.1	Eukaryota	2	100
Oscarella lobularis	Osclob_v00_mik.OX382150.1G229.1	cellular organisms	1	100
Oscarella lobularis	Osclob_v00_mik.OX382150.1G230.1	cellular organisms	1	100
Oscarella lobularis	Osclob_v00_mik.OX382150.1G231.1	Metazoa	4	100
Oscarella lobularis	Osclob_v00_mik.OX382150.1G232.2	cellular organisms	1	100
Oscarella lobularis	Osclob_v00_mik.OX382150.1G234.1	Opisthokonta	3	100
Oscarella lobularis	Osclob_v00_mik.OX382150.1G235.1	Metazoa	4	100
Oscarella lobularis	Osclob_v00_mik.OX382150.1G236.1	cellular organisms	1	100
Oscarella lobularis	Osclob_v00_mik.OX382150.1G239.1	Eukaryota	2	80
Oscarella lobularis	Osclob_v00_mik.OX382150.1G240.2	Eukaryota	2	100
Oscarella lobularis	Osclob_v00_mik.OX382150.1G241.1	Oscarella lobularis	7	100
Oscarella lobularis	Osclob_v00_mik.OX382150.1G24.1	cellular organisms	1	100
Oscarella lobularis	Osclob_v00_mik.OX382150.1G243.1	Oscarella lobularis	7	100
Oscarella lobularis	Osclob_v00_mik.OX382150.1G244.1	cellular organisms	1	100
Oscarella lobularis	Osclob_v00_mik.OX382150.1G245.1	Opisthokonta	3	100
Oscarella lobularis	Osclob_v00_mik.OX382150.1G246.1	Opisthokonta	3	100
Oscarella lobularis	Osclob_v00_mik.OX382150.1G247.1	Opisthokonta	3	100
Oscarella lobularis	Osclob_v00_mik.OX382150.1G248.1	cellular organisms	1	100
Oscarella lobularis	Osclob_v00_mik.OX382150.1G249.1	Opisthokonta	3	50
Oscarella lobularis	Osclob_v00_mik.OX382150.1G250.1	Eukaryota	2	80
Oscarella lobularis	Osclob_v00_mik.OX382150.1G251.2	cellular organisms	1	100
Oscarella lobularis	Osclob_v00_mik.OX382150.1G25.1	cellular organisms	1	100
Oscarella lobularis	Osclob_v00_mik.OX382150.1G252.1	Opisthokonta	3	75
Oscarella lobularis	Osclob_v00_mik.OX382150.1G253.1	Oscarella lobularis	7	100
Oscarella lobularis	Osclob_v00_mik.OX382150.1G254.1	Metazoa	4	100
Oscarella lobularis	Osclob_v00_mik.OX382150.1G256.3	Porifera	5	50
Oscarella lobularis	Osclob_v00_mik.OX382150.1G259.1	Oscarella lobularis	7	100
Oscarella lobularis	Osclob_v00_mik.OX382150.1G260.1	cellular organisms	1	100
Oscarella lobularis	Osclob_v00_mik.OX382150.1G261.1	Porifera	5	50
Oscarella lobularis	Osclob_v00_mik.OX382150.1G26.1	cellular organisms	1	100
Oscarella lobularis	Osclob_v00_mik.OX382150.1G263.1	Opisthokonta	3	100
Oscarella lobularis	Osclob_v00_mik.OX382150.1G265.1	Metazoa	4	33
Oscarella lobularis	Osclob_v00_mik.OX382150.1G266.1	Metazoa	4	100
Oscarella lobularis	Osclob_v00_mik.OX382150.1G267.1	Metazoa	4	100
Oscarella lobularis	Osclob_v00_mik.OX382150.1G268.2	Metazoa	4	100
Oscarella lobularis	Osclob_v00_mik.OX382150.1G269.1	Oscarella lobularis	7	100
Oscarella lobularis	Osclob_v00_mik.OX382150.1G270.1	Eukaryota	2	100
Oscarella lobularis	Osclob_v00_mik.OX382150.1G271.1	Eukaryota	2	100
Oscarella lobularis	Osclob_v00_mik.OX382150.1G27.1	Eukaryota	2	100
Oscarella lobularis	Osclob_v00_mik.OX382150.1G272.1	Eukaryota	2	100
Oscarella lobularis	Osclob_v00_mik.OX382150.1G273.1	Eukaryota	2	100
Oscarella lobularis	Osclob_v00_mik.OX382150.1G274.1	Eukaryota	2	100
Oscarella lobularis	Osclob_v00_mik.OX382150.1G275.1	Metazoa	4	100
Oscarella lobularis	Osclob_v00_mik.OX382150.1G277.1	cellular organisms	1	100
Oscarella lobularis	Osclob_v00_mik.OX382150.1G279.1	Opisthokonta	3	100
Oscarella lobularis	Osclob_v00_mik.OX382150.1G280.1	Oscarella lobularis	7	100
Oscarella lobularis	Osclob_v00_mik.OX382150.1G281.1	Metazoa	4	100
Oscarella lobularis	Osclob_v00_mik.OX382150.1G28.1	cellular organisms	1	100
Oscarella lobularis	Osclob_v00_mik.OX382150.1G282.1	Oscarella lobularis	7	100
Oscarella lobularis	Osclob_v00_mik.OX382150.1G283.1	cellular organisms	1	100
Oscarella lobularis	Osclob_v00_mik.OX382150.1G284.1	cellular organisms	1	100
Oscarella lobularis	Osclob_v00_mik.OX382150.1G285.1	Metazoa	4	100
Oscarella lobularis	Osclob_v00_mik.OX382150.1G286.1	cellular organisms	1	100
Oscarella lobularis	Osclob_v00_mik.OX382150.1G287.1	cellular organisms	1	66
Oscarella lobularis	Osclob_v00_mik.OX382150.1G288.1	Opisthokonta	3	100
Oscarella lobularis	Osclob_v00_mik.OX382150.1G289.1	cellular organisms	1	100
Oscarella lobularis	Osclob_v00_mik.OX382150.1G290.1	Metazoa	4	100
Oscarella lobularis	Osclob_v00_mik.OX382150.1G291.1	cellular organisms	1	100
Oscarella lobularis	Osclob_v00_mik.OX382150.1G29.1	cellular organisms	1	100
Oscarella lobularis	Osclob_v00_mik.OX382150.1G292.1	cellular organisms	1	100
Oscarella lobularis	Osclob_v00_mik.OX382150.1G293.1	Eukaryota	2	100
Oscarella lobularis	Osclob_v00_mik.OX382150.1G294.1	cellular organisms	1	100
Oscarella lobularis	Osclob_v00_mik.OX382150.1G295.1	Eukaryota	2	100
Oscarella lobularis	Osclob_v00_mik.OX382150.1G296.1	Homosclerophorida	6	100
Oscarella lobularis	Osclob_v00_mik.OX382150.1G297.1	Eukaryota	2	80
Oscarella lobularis	Osclob_v00_mik.OX382150.1G298.1	cellular organisms	1	100
Oscarella lobularis	Osclob_v00_mik.OX382150.1G299.2	cellular organisms	1	100
Oscarella lobularis	Osclob_v00_mik.OX382150.1G300.1	cellular organisms	1	100
Oscarella lobularis	Osclob_v00_mik.OX382150.1G301.1	cellular organisms	1	100
Oscarella lobularis	Osclob_v00_mik.OX382150.1G30.1	cellular organisms	1	100
Oscarella lobularis	Osclob_v00_mik.OX382150.1G302.1	cellular organisms	1	100
Oscarella lobularis	Osclob_v00_mik.OX382150.1G303.1	Eukaryota	2	100
Oscarella lobularis	Osclob_v00_mik.OX382150.1G304.1	cellular organisms	1	100
Oscarella lobularis	Osclob_v00_mik.OX382150.1G305.1	cellular organisms	1	100
Oscarella lobularis	Osclob_v00_mik.OX382150.1G306.1	cellular organisms	1	100
Oscarella lobularis	Osclob_v00_mik.OX382150.1G307.1	Metazoa	4	66
Oscarella lobularis	Osclob_v00_mik.OX382150.1G308.1	Oscarella lobularis	7	100
Oscarella lobularis	Osclob_v00_mik.OX382150.1G309.1	cellular organisms	1	100
Oscarella lobularis	Osclob_v00_mik.OX382150.1G310.1	Metazoa	4	100
Oscarella lobularis	Osclob_v00_mik.OX382150.1G311.1	cellular organisms	1	100
Oscarella lobularis	Osclob_v00_mik.OX382150.1G31.1	cellular organisms	1	100
Oscarella lobularis	Osclob_v00_mik.OX382150.1G312.1	Eukaryota	2	80
Oscarella lobularis	Osclob_v00_mik.OX382150.1G313.1	cellular organisms	1	100
Oscarella lobularis	Osclob_v00_mik.OX382150.1G314.1	Metazoa	4	66
Oscarella lobularis	Osclob_v00_mik.OX382150.1G315.1	cellular organisms	1	100
Oscarella lobularis	Osclob_v00_mik.OX382150.1G316.1	cellular organisms	1	100
Oscarella lobularis	Osclob_v00_mik.OX382150.1G318.1	Metazoa	4	100
Oscarella lobularis	Osclob_v00_mik.OX382150.1G319.1	Opisthokonta	3	100
Oscarella lobularis	Osclob_v00_mik.OX382150.1G3.1	Oscarella lobularis	7	100
Oscarella lobularis	Osclob_v00_mik.OX382150.1G320.1	cellular organisms	1	100
Oscarella lobularis	Osclob_v00_mik.OX382150.1G321.1	Eukaryota	2	100
Oscarella lobularis	Osclob_v00_mik.OX382150.1G32.1	Eukaryota	2	80
Oscarella lobularis	Osclob_v00_mik.OX382150.1G322.1	Eukaryota	2	100
Oscarella lobularis	Osclob_v00_mik.OX382150.1G323.1	Eukaryota	2	100
Oscarella lobularis	Osclob_v00_mik.OX382150.1G324.1	Eukaryota	2	100
Oscarella lobularis	Osclob_v00_mik.OX382150.1G325.1	Eukaryota	2	100
Oscarella lobularis	Osclob_v00_mik.OX382150.1G326.2	Eukaryota	2	60
Oscarella lobularis	Osclob_v00_mik.OX382150.1G327.1	cellular organisms	1	83
Oscarella lobularis	Osclob_v00_mik.OX382150.1G328.1	Metazoa	4	100
Oscarella lobularis	Osclob_v00_mik.OX382150.1G330.1	cellular organisms	1	83
Oscarella lobularis	Osclob_v00_mik.OX382150.1G331.1	Eukaryota	2	60
Oscarella lobularis	Osclob_v00_mik.OX382150.1G33.1	cellular organisms	1	100
Oscarella lobularis	Osclob_v00_mik.OX382150.1G332.1	Metazoa	4	100
Oscarella lobularis	Osclob_v00_mik.OX382150.1G333.1	cellular organisms	1	100
Oscarella lobularis	Osclob_v00_mik.OX382150.1G334.1	Oscarella lobularis	7	100
Oscarella lobularis	Osclob_v00_mik.OX382150.1G335.1	Oscarella lobularis	7	100
Oscarella lobularis	Osclob_v00_mik.OX382150.1G336.1	Oscarella lobularis	7	100
Oscarella lobularis	Osclob_v00_mik.OX382150.1G337.1	Metazoa	4	33
Oscarella lobularis	Osclob_v00_mik.OX382150.1G338.1	Metazoa	4	66
Oscarella lobularis	Osclob_v00_mik.OX382150.1G339.1	cellular organisms	1	100
Oscarella lobularis	Osclob_v00_mik.OX382150.1G340.1	cellular organisms	1	100
Oscarella lobularis	Osclob_v00_mik.OX382150.1G341.1	cellular organisms	1	100
Oscarella lobularis	Osclob_v00_mik.OX382150.1G34.1	cellular organisms	1	83
Oscarella lobularis	Osclob_v00_mik.OX382150.1G342.2	cellular organisms	1	100
Oscarella lobularis	Osclob_v00_mik.OX382150.1G344.1	cellular organisms	1	100
Oscarella lobularis	Osclob_v00_mik.OX382150.1G345.1	Oscarella lobularis	7	100
Oscarella lobularis	Osclob_v00_mik.OX382150.1G346.1	Oscarella lobularis	7	100
Oscarella lobularis	Osclob_v00_mik.OX382150.1G347.1	Possible contamination or HGT	NA	16
Oscarella lobularis	Osclob_v00_mik.OX382150.1G348.1	cellular organisms	1	100
Oscarella lobularis	Osclob_v00_mik.OX382150.1G349.1	cellular organisms	1	100
Oscarella lobularis	Osclob_v00_mik.OX382150.1G350.1	cellular organisms	1	100
Oscarella lobularis	Osclob_v00_mik.OX382150.1G351.1	cellular organisms	1	100
Oscarella lobularis	Osclob_v00_mik.OX382150.1G35.1	Metazoa	4	100
Oscarella lobularis	Osclob_v00_mik.OX382150.1G352.1	cellular organisms	1	100
Oscarella lobularis	Osclob_v00_mik.OX382150.1G353.1	Oscarella lobularis	7	100
Oscarella lobularis	Osclob_v00_mik.OX382150.1G354.1	Oscarella lobularis	7	100
Oscarella lobularis	Osclob_v00_mik.OX382150.1G355.1	Oscarella lobularis	7	100
Oscarella lobularis	Osclob_v00_mik.OX382150.1G356.1	Oscarella lobularis	7	100
Oscarella lobularis	Osclob_v00_mik.OX382150.1G357.1	Oscarella lobularis	7	100
Oscarella lobularis	Osclob_v00_mik.OX382150.1G358.1	cellular organisms	1	100
Oscarella lobularis	Osclob_v00_mik.OX382150.1G359.1	cellular organisms	1	50
Oscarella lobularis	Osclob_v00_mik.OX382150.1G360.1	Oscarella lobularis	7	100
Oscarella lobularis	Osclob_v00_mik.OX382150.1G361.1	cellular organisms	1	100
Oscarella lobularis	Osclob_v00_mik.OX382150.1G36.1	cellular organisms	1	100
Oscarella lobularis	Osclob_v00_mik.OX382150.1G362.1	Metazoa	4	66
Oscarella lobularis	Osclob_v00_mik.OX382150.1G363.1	cellular organisms	1	100
Oscarella lobularis	Osclob_v00_mik.OX382150.1G364.1	cellular organisms	1	100
Oscarella lobularis	Osclob_v00_mik.OX382150.1G365.1	cellular organisms	1	100
Oscarella lobularis	Osclob_v00_mik.OX382150.1G366.1	Porifera	5	50
Oscarella lobularis	Osclob_v00_mik.OX382150.1G367.1	cellular organisms	1	100
Oscarella lobularis	Osclob_v00_mik.OX382150.1G368.1	Possible contamination or HGT	NA	25
Oscarella lobularis	Osclob_v00_mik.OX382150.1G369.1	cellular organisms	1	100
Oscarella lobularis	Osclob_v00_mik.OX382150.1G370.1	Oscarella lobularis	7	100
Oscarella lobularis	Osclob_v00_mik.OX382150.1G371.1	Possible contamination or HGT	NA	16
Oscarella lobularis	Osclob_v00_mik.OX382150.1G37.1	Oscarella lobularis	7	100
Oscarella lobularis	Osclob_v00_mik.OX382150.1G372.1	cellular organisms	1	66
Oscarella lobularis	Osclob_v00_mik.OX382150.1G373.1	cellular organisms	1	66
Oscarella lobularis	Osclob_v00_mik.OX382150.1G374.1	Homosclerophorida	6	100
Oscarella lobularis	Osclob_v00_mik.OX382150.1G375.1	Homosclerophorida	6	100
Oscarella lobularis	Osclob_v00_mik.OX382150.1G376.1	Oscarella lobularis	7	100
Oscarella lobularis	Osclob_v00_mik.OX382150.1G377.1	Oscarella lobularis	7	100
Oscarella lobularis	Osclob_v00_mik.OX382150.1G378.1	cellular organisms	1	100
Oscarella lobularis	Osclob_v00_mik.OX382150.1G379.1	Possible contamination or HGT	NA	20
Oscarella lobularis	Osclob_v00_mik.OX382150.1G380.1	Porifera	5	50
Oscarella lobularis	Osclob_v00_mik.OX382150.1G381.1	cellular organisms	1	100
Oscarella lobularis	Osclob_v00_mik.OX382150.1G38.1	Metazoa	4	66
Oscarella lobularis	Osclob_v00_mik.OX382150.1G382.1	Metazoa	4	100
Oscarella lobularis	Osclob_v00_mik.OX382150.1G383.1	cellular organisms	1	100
Oscarella lobularis	Osclob_v00_mik.OX382150.1G384.2	Oscarella lobularis	7	100
Oscarella lobularis	Osclob_v00_mik.OX382150.1G385.1	cellular organisms	1	100
Oscarella lobularis	Osclob_v00_mik.OX382150.1G386.1	Eukaryota	2	100
Oscarella lobularis	Osclob_v00_mik.OX382150.1G387.1	cellular organisms	1	100
Oscarella lobularis	Osclob_v00_mik.OX382150.1G388.1	cellular organisms	1	100
Oscarella lobularis	Osclob_v00_mik.OX382150.1G389.1	Eukaryota	2	100
Oscarella lobularis	Osclob_v00_mik.OX382150.1G390.1	Metazoa	4	66
Oscarella lobularis	Osclob_v00_mik.OX382150.1G391.1	cellular organisms	1	100
Oscarella lobularis	Osclob_v00_mik.OX382150.1G39.1	Eukaryota	2	100
Oscarella lobularis	Osclob_v00_mik.OX382150.1G392.1	Eukaryota	2	100
Oscarella lobularis	Osclob_v00_mik.OX382150.1G393.1	cellular organisms	1	100
Oscarella lobularis	Osclob_v00_mik.OX382150.1G394.1	cellular organisms	1	100
Oscarella lobularis	Osclob_v00_mik.OX382150.1G395.1	cellular organisms	1	100
Oscarella lobularis	Osclob_v00_mik.OX382150.1G396.1	Opisthokonta	3	50
Oscarella lobularis	Osclob_v00_mik.OX382150.1G397.1	cellular organisms	1	100
Oscarella lobularis	Osclob_v00_mik.OX382150.1G398.1	Metazoa	4	100
Oscarella lobularis	Osclob_v00_mik.OX382150.1G400.2	Eukaryota	2	100
Oscarella lobularis	Osclob_v00_mik.OX382150.1G401.2	Homosclerophorida	6	100
Oscarella lobularis	Osclob_v00_mik.OX382150.1G40.1	Oscarella lobularis	7	100
Oscarella lobularis	Osclob_v00_mik.OX382150.1G402.1	Eukaryota	2	100
Oscarella lobularis	Osclob_v00_mik.OX382150.1G403.1	Metazoa	4	100
Oscarella lobularis	Osclob_v00_mik.OX382150.1G404.1	cellular organisms	1	83
Oscarella lobularis	Osclob_v00_mik.OX382150.1G405.1	cellular organisms	1	100
Oscarella lobularis	Osclob_v00_mik.OX382150.1G406.1	cellular organisms	1	100
Oscarella lobularis	Osclob_v00_mik.OX382150.1G407.1	Homosclerophorida	6	100
Oscarella lobularis	Osclob_v00_mik.OX382150.1G408.1	Eukaryota	2	100
Oscarella lobularis	Osclob_v00_mik.OX382150.1G409.1	Metazoa	4	100
Oscarella lobularis	Osclob_v00_mik.OX382150.1G410.1	cellular organisms	1	100
Oscarella lobularis	Osclob_v00_mik.OX382150.1G411.1	Eukaryota	2	80
Oscarella lobularis	Osclob_v00_mik.OX382150.1G41.1	Metazoa	4	66
Oscarella lobularis	Osclob_v00_mik.OX382150.1G413.1	Eukaryota	2	100
Oscarella lobularis	Osclob_v00_mik.OX382150.1G414.1	cellular organisms	1	100
Oscarella lobularis	Osclob_v00_mik.OX382150.1G415.1	Eukaryota	2	80
Oscarella lobularis	Osclob_v00_mik.OX382150.1G416.1	Metazoa	4	100
Oscarella lobularis	Osclob_v00_mik.OX382150.1G417.1	cellular organisms	1	100
Oscarella lobularis	Osclob_v00_mik.OX382150.1G418.1	cellular organisms	1	100
Oscarella lobularis	Osclob_v00_mik.OX382150.1G419.1	cellular organisms	1	100
Oscarella lobularis	Osclob_v00_mik.OX382150.1G4.1	cellular organisms	1	100
Oscarella lobularis	Osclob_v00_mik.OX382150.1G420.1	Oscarella lobularis	7	100
Oscarella lobularis	Osclob_v00_mik.OX382150.1G421.2	cellular organisms	1	100
Oscarella lobularis	Osclob_v00_mik.OX382150.1G42.1	Homosclerophorida	6	100
Oscarella lobularis	Osclob_v00_mik.OX382150.1G422.1	cellular organisms	1	100
Oscarella lobularis	Osclob_v00_mik.OX382150.1G423.1	Eukaryota	2	100
Oscarella lobularis	Osclob_v00_mik.OX382150.1G424.1	Eukaryota	2	100
Oscarella lobularis	Osclob_v00_mik.OX382150.1G425.1	cellular organisms	1	100
Oscarella lobularis	Osclob_v00_mik.OX382150.1G427.1	cellular organisms	1	100
Oscarella lobularis	Osclob_v00_mik.OX382150.1G428.1	Eukaryota	2	100
Oscarella lobularis	Osclob_v00_mik.OX382150.1G429.1	Eukaryota	2	100
Oscarella lobularis	Osclob_v00_mik.OX382150.1G430.1	Eukaryota	2	100
Oscarella lobularis	Osclob_v00_mik.OX382150.1G431.2	Eukaryota	2	100
Oscarella lobularis	Osclob_v00_mik.OX382150.1G43.1	Homosclerophorida	6	100
Oscarella lobularis	Osclob_v00_mik.OX382150.1G432.1	Eukaryota	2	100
Oscarella lobularis	Osclob_v00_mik.OX382150.1G433.1	cellular organisms	1	50
Oscarella lobularis	Osclob_v00_mik.OX382150.1G434.1	Eukaryota	2	100
Oscarella lobularis	Osclob_v00_mik.OX382150.1G435.1	cellular organisms	1	100
Oscarella lobularis	Osclob_v00_mik.OX382150.1G436.1	cellular organisms	1	100
Oscarella lobularis	Osclob_v00_mik.OX382150.1G437.1	cellular organisms	1	100
Oscarella lobularis	Osclob_v00_mik.OX382150.1G438.1	cellular organisms	1	100
Oscarella lobularis	Osclob_v00_mik.OX382150.1G439.1	cellular organisms	1	100
Oscarella lobularis	Osclob_v00_mik.OX382150.1G440.1	cellular organisms	1	100
Oscarella lobularis	Osclob_v00_mik.OX382150.1G441.1	Opisthokonta	3	75
Oscarella lobularis	Osclob_v00_mik.OX382150.1G44.1	Homosclerophorida	6	100
Oscarella lobularis	Osclob_v00_mik.OX382150.1G442.1	Eukaryota	2	100
Oscarella lobularis	Osclob_v00_mik.OX382150.1G443.1	Metazoa	4	100
Oscarella lobularis	Osclob_v00_mik.OX382150.1G444.1	cellular organisms	1	100
Oscarella lobularis	Osclob_v00_mik.OX382150.1G445.1	cellular organisms	1	100
Oscarella lobularis	Osclob_v00_mik.OX382150.1G446.1	cellular organisms	1	100
Oscarella lobularis	Osclob_v00_mik.OX382150.1G447.1	Metazoa	4	33
Oscarella lobularis	Osclob_v00_mik.OX382150.1G448.1	cellular organisms	1	100
Oscarella lobularis	Osclob_v00_mik.OX382150.1G449.1	cellular organisms	1	100
Oscarella lobularis	Osclob_v00_mik.OX382150.1G450.1	cellular organisms	1	100
Oscarella lobularis	Osclob_v00_mik.OX382150.1G451.1	cellular organisms	1	83
Oscarella lobularis	Osclob_v00_mik.OX382150.1G45.1	Metazoa	4	66
Oscarella lobularis	Osclob_v00_mik.OX382150.1G452.1	cellular organisms	1	100
Oscarella lobularis	Osclob_v00_mik.OX382150.1G453.1	Oscarella lobularis	7	100
Oscarella lobularis	Osclob_v00_mik.OX382150.1G454.1	cellular organisms	1	100
Oscarella lobularis	Osclob_v00_mik.OX382150.1G455.1	Oscarella lobularis	7	100
Oscarella lobularis	Osclob_v00_mik.OX382150.1G456.1	cellular organisms	1	100
Oscarella lobularis	Osclob_v00_mik.OX382150.1G457.2	Eukaryota	2	100
Oscarella lobularis	Osclob_v00_mik.OX382150.1G459.1	Eukaryota	2	80
Oscarella lobularis	Osclob_v00_mik.OX382150.1G460.1	Opisthokonta	3	100
Oscarella lobularis	Osclob_v00_mik.OX382150.1G461.1	Oscarella lobularis	7	100
Oscarella lobularis	Osclob_v00_mik.OX382150.1G46.1	Metazoa	4	66
Oscarella lobularis	Osclob_v00_mik.OX382150.1G462.1	Opisthokonta	3	100
Oscarella lobularis	Osclob_v00_mik.OX382150.1G463.1	cellular organisms	1	100
Oscarella lobularis	Osclob_v00_mik.OX382150.1G464.1	cellular organisms	1	100
Oscarella lobularis	Osclob_v00_mik.OX382150.1G465.1	cellular organisms	1	100
Oscarella lobularis	Osclob_v00_mik.OX382150.1G466.1	cellular organisms	1	50
Oscarella lobularis	Osclob_v00_mik.OX382150.1G468.1	cellular organisms	1	100
Oscarella lobularis	Osclob_v00_mik.OX382150.1G469.1	Homosclerophorida	6	100
Oscarella lobularis	Osclob_v00_mik.OX382150.1G470.1	cellular organisms	1	100
Oscarella lobularis	Osclob_v00_mik.OX382150.1G471.1	Eukaryota	2	60
Oscarella lobularis	Osclob_v00_mik.OX382150.1G47.1	Oscarella lobularis	7	100
Oscarella lobularis	Osclob_v00_mik.OX382150.1G472.1	Metazoa	4	100
Oscarella lobularis	Osclob_v00_mik.OX382150.1G473.1	Oscarella lobularis	7	100
Oscarella lobularis	Osclob_v00_mik.OX382150.1G474.1	cellular organisms	1	100
Oscarella lobularis	Osclob_v00_mik.OX382150.1G475.1	cellular organisms	1	100
Oscarella lobularis	Osclob_v00_mik.OX382150.1G476.1	Eukaryota	2	80
Oscarella lobularis	Osclob_v00_mik.OX382150.1G477.1	cellular organisms	1	100
Oscarella lobularis	Osclob_v00_mik.OX382150.1G478.1	Eukaryota	2	80
Oscarella lobularis	Osclob_v00_mik.OX382150.1G479.1	Metazoa	4	66
Oscarella lobularis	Osclob_v00_mik.OX382150.1G480.1	cellular organisms	1	100
Oscarella lobularis	Osclob_v00_mik.OX382150.1G481.1	cellular organisms	1	100
Oscarella lobularis	Osclob_v00_mik.OX382150.1G48.1	Oscarella lobularis	7	100
Oscarella lobularis	Osclob_v00_mik.OX382150.1G482.1	cellular organisms	1	100
Oscarella lobularis	Osclob_v00_mik.OX382150.1G483.1	cellular organisms	1	50
Oscarella lobularis	Osclob_v00_mik.OX382150.1G484.1	cellular organisms	1	100
Oscarella lobularis	Osclob_v00_mik.OX382150.1G485.1	cellular organisms	1	33
Oscarella lobularis	Osclob_v00_mik.OX382150.1G487.1	cellular organisms	1	100
Oscarella lobularis	Osclob_v00_mik.OX382150.1G489.1	Possible contamination or HGT	NA	16
Oscarella lobularis	Osclob_v00_mik.OX382150.1G490.1	Oscarella lobularis	7	100
Oscarella lobularis	Osclob_v00_mik.OX382150.1G491.1	cellular organisms	1	100
Oscarella lobularis	Osclob_v00_mik.OX382150.1G49.1	Oscarella lobularis	7	100
Oscarella lobularis	Osclob_v00_mik.OX382150.1G492.1	cellular organisms	1	100
Oscarella lobularis	Osclob_v00_mik.OX382150.1G493.1	Oscarella lobularis	7	100
Oscarella lobularis	Osclob_v00_mik.OX382150.1G494.1	cellular organisms	1	100
Oscarella lobularis	Osclob_v00_mik.OX382150.1G495.1	Eukaryota	2	100
Oscarella lobularis	Osclob_v00_mik.OX382150.1G496.1	cellular organisms	1	100
Oscarella lobularis	Osclob_v00_mik.OX382150.1G497.1	cellular organisms	1	100
Oscarella lobularis	Osclob_v00_mik.OX382150.1G498.1	cellular organisms	1	100
Oscarella lobularis	Osclob_v00_mik.OX382150.1G499.1	cellular organisms	1	100
Oscarella lobularis	Osclob_v00_mik.OX382150.1G500.1	cellular organisms	1	100
Oscarella lobularis	Osclob_v00_mik.OX382150.1G501.1	Oscarella lobularis	7	100
Oscarella lobularis	Osclob_v00_mik.OX382150.1G50.1	Eukaryota	2	80
Oscarella lobularis	Osclob_v00_mik.OX382150.1G502.1	cellular organisms	1	83
Oscarella lobularis	Osclob_v00_mik.OX382150.1G503.1	cellular organisms	1	100
Oscarella lobularis	Osclob_v00_mik.OX382150.1G504.2	Oscarella lobularis	7	100
Oscarella lobularis	Osclob_v00_mik.OX382150.1G506.2	cellular organisms	1	100
Oscarella lobularis	Osclob_v00_mik.OX382150.1G507.1	cellular organisms	1	100
Oscarella lobularis	Osclob_v00_mik.OX382150.1G508.1	Oscarella lobularis	7	100
Oscarella lobularis	Osclob_v00_mik.OX382150.1G509.1	Metazoa	4	66
Oscarella lobularis	Osclob_v00_mik.OX382150.1G510.2	cellular organisms	1	100
Oscarella lobularis	Osclob_v00_mik.OX382150.1G511.1	cellular organisms	1	100
Oscarella lobularis	Osclob_v00_mik.OX382150.1G51.1	Metazoa	4	100
Oscarella lobularis	Osclob_v00_mik.OX382150.1G512.1	Metazoa	4	100
Oscarella lobularis	Osclob_v00_mik.OX382150.1G513.1	cellular organisms	1	100
Oscarella lobularis	Osclob_v00_mik.OX382150.1G514.1	cellular organisms	1	100
Oscarella lobularis	Osclob_v00_mik.OX382150.1G515.1	Eukaryota	2	80
Oscarella lobularis	Osclob_v00_mik.OX382150.1G516.1	cellular organisms	1	100
Oscarella lobularis	Osclob_v00_mik.OX382150.1G517.1	cellular organisms	1	100
Oscarella lobularis	Osclob_v00_mik.OX382150.1G518.1	cellular organisms	1	100
Oscarella lobularis	Osclob_v00_mik.OX382150.1G5.1	cellular organisms	1	100
Oscarella lobularis	Osclob_v00_mik.OX382150.1G520.1	Metazoa	4	100
Oscarella lobularis	Osclob_v00_mik.OX382150.1G521.1	cellular organisms	1	100
Oscarella lobularis	Osclob_v00_mik.OX382150.1G52.1	cellular organisms	1	100
Oscarella lobularis	Osclob_v00_mik.OX382150.1G522.1	cellular organisms	1	100
Oscarella lobularis	Osclob_v00_mik.OX382150.1G523.1	cellular organisms	1	100
Oscarella lobularis	Osclob_v00_mik.OX382150.1G525.1	cellular organisms	1	100
Oscarella lobularis	Osclob_v00_mik.OX382150.1G526.1	Oscarella lobularis	7	100
Oscarella lobularis	Osclob_v00_mik.OX382150.1G527.1	cellular organisms	1	100
Oscarella lobularis	Osclob_v00_mik.OX382150.1G528.1	cellular organisms	1	100
Oscarella lobularis	Osclob_v00_mik.OX382150.1G529.1	cellular organisms	1	100
Oscarella lobularis	Osclob_v00_mik.OX382150.1G531.2	Eukaryota	2	100
Oscarella lobularis	Osclob_v00_mik.OX382150.1G53.1	Eukaryota	2	100
Oscarella lobularis	Osclob_v00_mik.OX382150.1G532.1	cellular organisms	1	100
Oscarella lobularis	Osclob_v00_mik.OX382150.1G533.1	cellular organisms	1	100
Oscarella lobularis	Osclob_v00_mik.OX382150.1G534.1	cellular organisms	1	100
Oscarella lobularis	Osclob_v00_mik.OX382150.1G535.1	cellular organisms	1	100
Oscarella lobularis	Osclob_v00_mik.OX382150.1G536.1	Oscarella lobularis	7	100
Oscarella lobularis	Osclob_v00_mik.OX382150.1G537.1	cellular organisms	1	100
Oscarella lobularis	Osclob_v00_mik.OX382150.1G539.1	cellular organisms	1	100
Oscarella lobularis	Osclob_v00_mik.OX382150.1G540.1	cellular organisms	1	100
Oscarella lobularis	Osclob_v00_mik.OX382150.1G54.1	cellular organisms	1	100
Oscarella lobularis	Osclob_v00_mik.OX382150.1G543.1	Eukaryota	2	80
Oscarella lobularis	Osclob_v00_mik.OX382150.1G544.1	cellular organisms	1	100
Oscarella lobularis	Osclob_v00_mik.OX382150.1G545.1	Oscarella lobularis	7	100
Oscarella lobularis	Osclob_v00_mik.OX382150.1G546.1	cellular organisms	1	100
Oscarella lobularis	Osclob_v00_mik.OX382150.1G547.1	Oscarella lobularis	7	100
Oscarella lobularis	Osclob_v00_mik.OX382150.1G548.1	cellular organisms	1	83
Oscarella lobularis	Osclob_v00_mik.OX382150.1G549.1	cellular organisms	1	100
Oscarella lobularis	Osclob_v00_mik.OX382150.1G550.1	cellular organisms	1	100
Oscarella lobularis	Osclob_v00_mik.OX382150.1G551.1	Eukaryota	2	100
Oscarella lobularis	Osclob_v00_mik.OX382150.1G552.1	cellular organisms	1	83
Oscarella lobularis	Osclob_v00_mik.OX382150.1G55.2	Oscarella lobularis	7	100
Oscarella lobularis	Osclob_v00_mik.OX382150.1G553.2	cellular organisms	1	83
Oscarella lobularis	Osclob_v00_mik.OX382150.1G554.1	cellular organisms	1	100
Oscarella lobularis	Osclob_v00_mik.OX382150.1G555.1	Eukaryota	2	100
Oscarella lobularis	Osclob_v00_mik.OX382150.1G556.1	cellular organisms	1	100
Oscarella lobularis	Osclob_v00_mik.OX382150.1G557.1	cellular organisms	1	100
Oscarella lobularis	Osclob_v00_mik.OX382150.1G558.1	cellular organisms	1	100
Oscarella lobularis	Osclob_v00_mik.OX382150.1G559.1	Oscarella lobularis	7	100
Oscarella lobularis	Osclob_v00_mik.OX382150.1G560.2	cellular organisms	1	100
Oscarella lobularis	Osclob_v00_mik.OX382150.1G561.1	cellular organisms	1	83
Oscarella lobularis	Osclob_v00_mik.OX382150.1G56.1	Oscarella lobularis	7	100
Oscarella lobularis	Osclob_v00_mik.OX382150.1G562.1	Metazoa	4	100
Oscarella lobularis	Osclob_v00_mik.OX382150.1G563.1	cellular organisms	1	100
Oscarella lobularis	Osclob_v00_mik.OX382150.1G564.1	Eukaryota	2	100
Oscarella lobularis	Osclob_v00_mik.OX382150.1G565.1	cellular organisms	1	100
Oscarella lobularis	Osclob_v00_mik.OX382150.1G566.1	Oscarella lobularis	7	100
Oscarella lobularis	Osclob_v00_mik.OX382150.1G567.1	Oscarella lobularis	7	100
Oscarella lobularis	Osclob_v00_mik.OX382150.1G568.1	cellular organisms	1	100
Oscarella lobularis	Osclob_v00_mik.OX382150.1G569.1	cellular organisms	1	100
Oscarella lobularis	Osclob_v00_mik.OX382150.1G570.1	cellular organisms	1	100
Oscarella lobularis	Osclob_v00_mik.OX382150.1G571.1	cellular organisms	1	100
Oscarella lobularis	Osclob_v00_mik.OX382150.1G57.1	Metazoa	4	66
Oscarella lobularis	Osclob_v00_mik.OX382150.1G572.1	Metazoa	4	100
Oscarella lobularis	Osclob_v00_mik.OX382150.1G573.1	Eukaryota	2	100
Oscarella lobularis	Osclob_v00_mik.OX382150.1G574.1	cellular organisms	1	100
Oscarella lobularis	Osclob_v00_mik.OX382150.1G575.1	cellular organisms	1	100
Oscarella lobularis	Osclob_v00_mik.OX382150.1G576.1	cellular organisms	1	83
Oscarella lobularis	Osclob_v00_mik.OX382150.1G577.2	Homosclerophorida	6	100
Oscarella lobularis	Osclob_v00_mik.OX382150.1G578.2	Homosclerophorida	6	100
Oscarella lobularis	Osclob_v00_mik.OX382150.1G579.1	Metazoa	4	66
Oscarella lobularis	Osclob_v00_mik.OX382150.1G580.1	Metazoa	4	33
Oscarella lobularis	Osclob_v00_mik.OX382150.1G581.1	cellular organisms	1	83
Oscarella lobularis	Osclob_v00_mik.OX382150.1G582.1	Metazoa	4	33
Oscarella lobularis	Osclob_v00_mik.OX382150.1G58.2	Homosclerophorida	6	100
Oscarella lobularis	Osclob_v00_mik.OX382150.1G583.1	Metazoa	4	33
Oscarella lobularis	Osclob_v00_mik.OX382150.1G584.1	cellular organisms	1	100
Oscarella lobularis	Osclob_v00_mik.OX382150.1G585.1	Eukaryota	2	100
Oscarella lobularis	Osclob_v00_mik.OX382150.1G586.1	Eukaryota	2	100
Oscarella lobularis	Osclob_v00_mik.OX382150.1G587.1	Oscarella lobularis	7	100
Oscarella lobularis	Osclob_v00_mik.OX382150.1G588.1	Metazoa	4	66
Oscarella lobularis	Osclob_v00_mik.OX382150.1G589.1	cellular organisms	1	100
Oscarella lobularis	Osclob_v00_mik.OX382150.1G590.1	Oscarella lobularis	7	100
Oscarella lobularis	Osclob_v00_mik.OX382150.1G591.1	Oscarella lobularis	7	100
Oscarella lobularis	Osclob_v00_mik.OX382150.1G592.1	Metazoa	4	100
Oscarella lobularis	Osclob_v00_mik.OX382150.1G593.1	cellular organisms	1	100
Oscarella lobularis	Osclob_v00_mik.OX382150.1G594.2	Eukaryota	2	40
Oscarella lobularis	Osclob_v00_mik.OX382150.1G595.1	Eukaryota	2	40
Oscarella lobularis	Osclob_v00_mik.OX382150.1G596.1	Eukaryota	2	100
Oscarella lobularis	Osclob_v00_mik.OX382150.1G597.1	Oscarella lobularis	7	100
Oscarella lobularis	Osclob_v00_mik.OX382150.1G599.1	Homosclerophorida	6	100
Oscarella lobularis	Osclob_v00_mik.OX382150.1G600.1	Metazoa	4	66
Oscarella lobularis	Osclob_v00_mik.OX382150.1G601.1	cellular organisms	1	100
Oscarella lobularis	Osclob_v00_mik.OX382150.1G60.1	Oscarella lobularis	7	100
Oscarella lobularis	Osclob_v00_mik.OX382150.1G604.1	cellular organisms	1	100
Oscarella lobularis	Osclob_v00_mik.OX382150.1G605.1	Opisthokonta	3	100
Oscarella lobularis	Osclob_v00_mik.OX382150.1G606.1	Metazoa	4	66
Oscarella lobularis	Osclob_v00_mik.OX382150.1G607.1	Eukaryota	2	60
Oscarella lobularis	Osclob_v00_mik.OX382150.1G608.1	Eukaryota	2	80
Oscarella lobularis	Osclob_v00_mik.OX382150.1G609.1	Eukaryota	2	100
Oscarella lobularis	Osclob_v00_mik.OX382150.1G610.1	cellular organisms	1	100
Oscarella lobularis	Osclob_v00_mik.OX382150.1G611.1	Eukaryota	2	100
Oscarella lobularis	Osclob_v00_mik.OX382150.1G61.1	cellular organisms	1	100
Oscarella lobularis	Osclob_v00_mik.OX382150.1G612.1	cellular organisms	1	100
Oscarella lobularis	Osclob_v00_mik.OX382150.1G613.1	cellular organisms	1	100
Oscarella lobularis	Osclob_v00_mik.OX382150.1G614.1	cellular organisms	1	100
Oscarella lobularis	Osclob_v00_mik.OX382150.1G616.1	cellular organisms	1	66
Oscarella lobularis	Osclob_v00_mik.OX382150.1G617.1	cellular organisms	1	66
Oscarella lobularis	Osclob_v00_mik.OX382150.1G618.3	Metazoa	4	66
Oscarella lobularis	Osclob_v00_mik.OX382150.1G619.1	cellular organisms	1	100
Oscarella lobularis	Osclob_v00_mik.OX382150.1G6.1	cellular organisms	1	100
Oscarella lobularis	Osclob_v00_mik.OX382150.1G620.2	Oscarella lobularis	7	100
Oscarella lobularis	Osclob_v00_mik.OX382150.1G621.1	cellular organisms	1	83
Oscarella lobularis	Osclob_v00_mik.OX382150.1G62.1	Eukaryota	2	100
Oscarella lobularis	Osclob_v00_mik.OX382150.1G622.1	Oscarella lobularis	7	100
Oscarella lobularis	Osclob_v00_mik.OX382150.1G623.1	Homosclerophorida	6	100
Oscarella lobularis	Osclob_v00_mik.OX382150.1G624.1	cellular organisms	1	100
Oscarella lobularis	Osclob_v00_mik.OX382150.1G625.1	Oscarella lobularis	7	100
Oscarella lobularis	Osclob_v00_mik.OX382150.1G626.1	Eukaryota	2	100
Oscarella lobularis	Osclob_v00_mik.OX382150.1G627.1	cellular organisms	1	100
Oscarella lobularis	Osclob_v00_mik.OX382150.1G628.1	Metazoa	4	66
Oscarella lobularis	Osclob_v00_mik.OX382150.1G629.1	Homosclerophorida	6	100
Oscarella lobularis	Osclob_v00_mik.OX382150.1G630.1	Oscarella lobularis	7	100
Oscarella lobularis	Osclob_v00_mik.OX382150.1G631.1	cellular organisms	1	100
Oscarella lobularis	Osclob_v00_mik.OX382150.1G632.1	Metazoa	4	33
Oscarella lobularis	Osclob_v00_mik.OX382150.1G63.2	cellular organisms	1	100
Oscarella lobularis	Osclob_v00_mik.OX382150.1G633.1	Oscarella lobularis	7	100
Oscarella lobularis	Osclob_v00_mik.OX382150.1G634.1	Homosclerophorida	6	100
Oscarella lobularis	Osclob_v00_mik.OX382150.1G635.1	cellular organisms	1	100
Oscarella lobularis	Osclob_v00_mik.OX382150.1G636.1	Oscarella lobularis	7	100
Oscarella lobularis	Osclob_v00_mik.OX382150.1G637.1	cellular organisms	1	100
Oscarella lobularis	Osclob_v00_mik.OX382150.1G638.1	Oscarella lobularis	7	100
Oscarella lobularis	Osclob_v00_mik.OX382150.1G639.1	cellular organisms	1	100
Oscarella lobularis	Osclob_v00_mik.OX382150.1G640.1	Oscarella lobularis	7	100
Oscarella lobularis	Osclob_v00_mik.OX382150.1G641.1	cellular organisms	1	100
Oscarella lobularis	Osclob_v00_mik.OX382150.1G64.1	cellular organisms	1	100
Oscarella lobularis	Osclob_v00_mik.OX382150.1G642.1	Oscarella lobularis	7	100
Oscarella lobularis	Osclob_v00_mik.OX382150.1G644.1	cellular organisms	1	100
Oscarella lobularis	Osclob_v00_mik.OX382150.1G645.1	cellular organisms	1	100
Oscarella lobularis	Osclob_v00_mik.OX382150.1G646.1	Oscarella lobularis	7	100
Oscarella lobularis	Osclob_v00_mik.OX382150.1G647.1	Oscarella lobularis	7	100
Oscarella lobularis	Osclob_v00_mik.OX382150.1G648.1	Oscarella lobularis	7	100
Oscarella lobularis	Osclob_v00_mik.OX382150.1G649.1	Eukaryota	2	100
Oscarella lobularis	Osclob_v00_mik.OX382150.1G650.1	Eukaryota	2	100
Oscarella lobularis	Osclob_v00_mik.OX382150.1G651.1	Eukaryota	2	100
Oscarella lobularis	Osclob_v00_mik.OX382150.1G65.1	Metazoa	4	100
Oscarella lobularis	Osclob_v00_mik.OX382150.1G652.1	Eukaryota	2	100
Oscarella lobularis	Osclob_v00_mik.OX382150.1G653.1	cellular organisms	1	100
Oscarella lobularis	Osclob_v00_mik.OX382150.1G654.1	Oscarella lobularis	7	100
Oscarella lobularis	Osclob_v00_mik.OX382150.1G655.1	Eukaryota	2	100
Oscarella lobularis	Osclob_v00_mik.OX382150.1G656.1	cellular organisms	1	100
Oscarella lobularis	Osclob_v00_mik.OX382150.1G657.1	cellular organisms	1	100
Oscarella lobularis	Osclob_v00_mik.OX382150.1G658.1	Opisthokonta	3	100
Oscarella lobularis	Osclob_v00_mik.OX382150.1G659.1	Eukaryota	2	100
Oscarella lobularis	Osclob_v00_mik.OX382150.1G660.1	cellular organisms	1	100
Oscarella lobularis	Osclob_v00_mik.OX382150.1G661.1	Oscarella lobularis	7	100
Oscarella lobularis	Osclob_v00_mik.OX382150.1G66.1	cellular organisms	1	100
Oscarella lobularis	Osclob_v00_mik.OX382150.1G662.1	Oscarella lobularis	7	100
Oscarella lobularis	Osclob_v00_mik.OX382150.1G663.2	Oscarella lobularis	7	100
Oscarella lobularis	Osclob_v00_mik.OX382150.1G664.1	Oscarella lobularis	7	100
Oscarella lobularis	Osclob_v00_mik.OX382150.1G665.1	Metazoa	4	33
Oscarella lobularis	Osclob_v00_mik.OX382150.1G666.1	Oscarella lobularis	7	100
Oscarella lobularis	Osclob_v00_mik.OX382150.1G667.1	cellular organisms	1	66
Oscarella lobularis	Osclob_v00_mik.OX382150.1G668.1	cellular organisms	1	100
Oscarella lobularis	Osclob_v00_mik.OX382150.1G669.1	Oscarella lobularis	7	100
Oscarella lobularis	Osclob_v00_mik.OX382150.1G670.1	Oscarella lobularis	7	100
Oscarella lobularis	Osclob_v00_mik.OX382150.1G671.1	Oscarella lobularis	7	100
Oscarella lobularis	Osclob_v00_mik.OX382150.1G67.1	cellular organisms	1	100
Oscarella lobularis	Osclob_v00_mik.OX382150.1G672.1	cellular organisms	1	100
Oscarella lobularis	Osclob_v00_mik.OX382150.1G673.1	cellular organisms	1	100
Oscarella lobularis	Osclob_v00_mik.OX382150.1G674.1	cellular organisms	1	100
Oscarella lobularis	Osclob_v00_mik.OX382150.1G675.1	cellular organisms	1	100
Oscarella lobularis	Osclob_v00_mik.OX382150.1G676.1	cellular organisms	1	100
Oscarella lobularis	Osclob_v00_mik.OX382150.1G677.1	Eukaryota	2	100
Oscarella lobularis	Osclob_v00_mik.OX382150.1G678.1	Eukaryota	2	100
Oscarella lobularis	Osclob_v00_mik.OX382150.1G679.1	Oscarella lobularis	7	100
Oscarella lobularis	Osclob_v00_mik.OX382150.1G680.1	Homosclerophorida	6	100
Oscarella lobularis	Osclob_v00_mik.OX382150.1G681.1	cellular organisms	1	100
Oscarella lobularis	Osclob_v00_mik.OX382150.1G68.1	cellular organisms	1	100
Oscarella lobularis	Osclob_v00_mik.OX382150.1G682.1	cellular organisms	1	100
Oscarella lobularis	Osclob_v00_mik.OX382150.1G683.1	cellular organisms	1	100
Oscarella lobularis	Osclob_v00_mik.OX382150.1G684.1	cellular organisms	1	100
Oscarella lobularis	Osclob_v00_mik.OX382150.1G685.1	Metazoa	4	100
Oscarella lobularis	Osclob_v00_mik.OX382150.1G686.1	Eukaryota	2	100
Oscarella lobularis	Osclob_v00_mik.OX382150.1G688.1	Oscarella lobularis	7	100
Oscarella lobularis	Osclob_v00_mik.OX382150.1G689.1	Oscarella lobularis	7	100
Oscarella lobularis	Osclob_v00_mik.OX382150.1G690.1	Oscarella lobularis	7	100
Oscarella lobularis	Osclob_v00_mik.OX382150.1G69.1	Eukaryota	2	100
Oscarella lobularis	Osclob_v00_mik.OX382150.1G692.1	Homosclerophorida	6	100
Oscarella lobularis	Osclob_v00_mik.OX382150.1G693.1	Homosclerophorida	6	100
Oscarella lobularis	Osclob_v00_mik.OX382150.1G695.1	Porifera	5	100
Oscarella lobularis	Osclob_v00_mik.OX382150.1G696.1	Oscarella lobularis	7	100
Oscarella lobularis	Osclob_v00_mik.OX382150.1G697.1	Oscarella lobularis	7	100
Oscarella lobularis	Osclob_v00_mik.OX382150.1G698.1	Homosclerophorida	6	100
Oscarella lobularis	Osclob_v00_mik.OX382150.1G699.1	Homosclerophorida	6	100
Oscarella lobularis	Osclob_v00_mik.OX382150.1G700.1	Oscarella lobularis	7	100
Oscarella lobularis	Osclob_v00_mik.OX382150.1G701.1	cellular organisms	1	100
Oscarella lobularis	Osclob_v00_mik.OX382150.1G70.1	cellular organisms	1	100
Oscarella lobularis	Osclob_v00_mik.OX382150.1G702.1	cellular organisms	1	100
Oscarella lobularis	Osclob_v00_mik.OX382150.1G703.1	Homosclerophorida	6	100
Oscarella lobularis	Osclob_v00_mik.OX382150.1G704.1	cellular organisms	1	100
Oscarella lobularis	Osclob_v00_mik.OX382150.1G705.1	cellular organisms	1	100
Oscarella lobularis	Osclob_v00_mik.OX382150.1G706.1	Oscarella lobularis	7	100
Oscarella lobularis	Osclob_v00_mik.OX382150.1G707.1	Oscarella lobularis	7	100
Oscarella lobularis	Osclob_v00_mik.OX382150.1G708.1	cellular organisms	1	100
Oscarella lobularis	Osclob_v00_mik.OX382150.1G709.1	Opisthokonta	3	100
Oscarella lobularis	Osclob_v00_mik.OX382150.1G710.1	Oscarella lobularis	7	100
Oscarella lobularis	Osclob_v00_mik.OX382150.1G711.1	Eukaryota	2	100
Oscarella lobularis	Osclob_v00_mik.OX382150.1G71.1	cellular organisms	1	100
Oscarella lobularis	Osclob_v00_mik.OX382150.1G712.1	Metazoa	4	100
Oscarella lobularis	Osclob_v00_mik.OX382150.1G713.1	Oscarella lobularis	7	100
Oscarella lobularis	Osclob_v00_mik.OX382150.1G714.1	Eukaryota	2	100
Oscarella lobularis	Osclob_v00_mik.OX382150.1G718.1	Metazoa	4	33
Oscarella lobularis	Osclob_v00_mik.OX382150.1G719.1	Oscarella lobularis	7	100
Oscarella lobularis	Osclob_v00_mik.OX382150.1G7.1	cellular organisms	1	100
Oscarella lobularis	Osclob_v00_mik.OX382150.1G720.1	Oscarella lobularis	7	100
Oscarella lobularis	Osclob_v00_mik.OX382150.1G721.1	Oscarella lobularis	7	100
Oscarella lobularis	Osclob_v00_mik.OX382150.1G72.1	cellular organisms	1	100
Oscarella lobularis	Osclob_v00_mik.OX382150.1G722.1	cellular organisms	1	100
Oscarella lobularis	Osclob_v00_mik.OX382150.1G723.1	cellular organisms	1	100
Oscarella lobularis	Osclob_v00_mik.OX382150.1G724.1	Eukaryota	2	100
Oscarella lobularis	Osclob_v00_mik.OX382150.1G725.1	Eukaryota	2	100
Oscarella lobularis	Osclob_v00_mik.OX382150.1G726.1	Eukaryota	2	100
Oscarella lobularis	Osclob_v00_mik.OX382150.1G727.1	Oscarella lobularis	7	100
Oscarella lobularis	Osclob_v00_mik.OX382150.1G728.1	Eukaryota	2	100
Oscarella lobularis	Osclob_v00_mik.OX382150.1G729.1	cellular organisms	1	83
Oscarella lobularis	Osclob_v00_mik.OX382150.1G730.1	Opisthokonta	3	100
Oscarella lobularis	Osclob_v00_mik.OX382150.1G731.2	Homosclerophorida	6	100
Oscarella lobularis	Osclob_v00_mik.OX382150.1G73.1	cellular organisms	1	100
Oscarella lobularis	Osclob_v00_mik.OX382150.1G732.1	Eukaryota	2	80
Oscarella lobularis	Osclob_v00_mik.OX382150.1G733.1	Oscarella lobularis	7	100
Oscarella lobularis	Osclob_v00_mik.OX382150.1G734.1	Eukaryota	2	60
Oscarella lobularis	Osclob_v00_mik.OX382150.1G735.1	Metazoa	4	100
Oscarella lobularis	Osclob_v00_mik.OX382150.1G736.1	cellular organisms	1	100
Oscarella lobularis	Osclob_v00_mik.OX382150.1G737.1	cellular organisms	1	100
Oscarella lobularis	Osclob_v00_mik.OX382150.1G738.1	Eukaryota	2	100
Oscarella lobularis	Osclob_v00_mik.OX382150.1G739.1	cellular organisms	1	100
Oscarella lobularis	Osclob_v00_mik.OX382150.1G740.2	Metazoa	4	66
Oscarella lobularis	Osclob_v00_mik.OX382150.1G74.1	cellular organisms	1	100
Oscarella lobularis	Osclob_v00_mik.OX382150.1G742.1	cellular organisms	1	100
Oscarella lobularis	Osclob_v00_mik.OX382150.1G743.1	cellular organisms	1	100
Oscarella lobularis	Osclob_v00_mik.OX382150.1G744.1	Homosclerophorida	6	100
Oscarella lobularis	Osclob_v00_mik.OX382150.1G745.1	cellular organisms	1	100
Oscarella lobularis	Osclob_v00_mik.OX382150.1G746.1	Homosclerophorida	6	100
Oscarella lobularis	Osclob_v00_mik.OX382150.1G747.1	Oscarella lobularis	7	100
Oscarella lobularis	Osclob_v00_mik.OX382150.1G748.1	Opisthokonta	3	100
Oscarella lobularis	Osclob_v00_mik.OX382150.1G749.1	cellular organisms	1	100
Oscarella lobularis	Osclob_v00_mik.OX382150.1G750.1	cellular organisms	1	100
Oscarella lobularis	Osclob_v00_mik.OX382150.1G751.1	cellular organisms	1	100
Oscarella lobularis	Osclob_v00_mik.OX382150.1G75.1	cellular organisms	1	100
Oscarella lobularis	Osclob_v00_mik.OX382150.1G752.1	cellular organisms	1	100
Oscarella lobularis	Osclob_v00_mik.OX382150.1G753.1	cellular organisms	1	100
Oscarella lobularis	Osclob_v00_mik.OX382150.1G756.1	cellular organisms	1	100
Oscarella lobularis	Osclob_v00_mik.OX382150.1G757.1	cellular organisms	1	100
Oscarella lobularis	Osclob_v00_mik.OX382150.1G758.1	cellular organisms	1	100
Oscarella lobularis	Osclob_v00_mik.OX382150.1G759.1	cellular organisms	1	66
Oscarella lobularis	Osclob_v00_mik.OX382150.1G760.1	cellular organisms	1	100
Oscarella lobularis	Osclob_v00_mik.OX382150.1G761.1	cellular organisms	1	100
Oscarella lobularis	Osclob_v00_mik.OX382150.1G76.1	cellular organisms	1	100
Oscarella lobularis	Osclob_v00_mik.OX382150.1G762.1	cellular organisms	1	100
Oscarella lobularis	Osclob_v00_mik.OX382150.1G763.1	cellular organisms	1	100
Oscarella lobularis	Osclob_v00_mik.OX382150.1G764.1	cellular organisms	1	100
Oscarella lobularis	Osclob_v00_mik.OX382150.1G765.1	cellular organisms	1	100
Oscarella lobularis	Osclob_v00_mik.OX382150.1G766.1	Eukaryota	2	80
Oscarella lobularis	Osclob_v00_mik.OX382150.1G767.1	cellular organisms	1	100
Oscarella lobularis	Osclob_v00_mik.OX382150.1G768.1	Oscarella lobularis	7	100
Oscarella lobularis	Osclob_v00_mik.OX382150.1G769.1	cellular organisms	1	100
Oscarella lobularis	Osclob_v00_mik.OX382150.1G770.1	Eukaryota	2	100
Oscarella lobularis	Osclob_v00_mik.OX382150.1G771.1	cellular organisms	1	100
Oscarella lobularis	Osclob_v00_mik.OX382150.1G773.1	Oscarella lobularis	7	100
Oscarella lobularis	Osclob_v00_mik.OX382150.1G774.1	cellular organisms	1	100
Oscarella lobularis	Osclob_v00_mik.OX382150.1G775.1	cellular organisms	1	100
Oscarella lobularis	Osclob_v00_mik.OX382150.1G776.1	Eukaryota	2	100
Oscarella lobularis	Osclob_v00_mik.OX382150.1G777.1	cellular organisms	1	100
Oscarella lobularis	Osclob_v00_mik.OX382150.1G778.1	Oscarella lobularis	7	100
Oscarella lobularis	Osclob_v00_mik.OX382150.1G779.1	cellular organisms	1	100
Oscarella lobularis	Osclob_v00_mik.OX382150.1G780.1	Eukaryota	2	80
Oscarella lobularis	Osclob_v00_mik.OX382150.1G781.1	Oscarella lobularis	7	100
Oscarella lobularis	Osclob_v00_mik.OX382150.1G78.1	cellular organisms	1	100
Oscarella lobularis	Osclob_v00_mik.OX382150.1G782.1	Metazoa	4	66
Oscarella lobularis	Osclob_v00_mik.OX382150.1G783.1	cellular organisms	1	100
Oscarella lobularis	Osclob_v00_mik.OX382150.1G784.1	cellular organisms	1	100
Oscarella lobularis	Osclob_v00_mik.OX382150.1G785.1	cellular organisms	1	100
Oscarella lobularis	Osclob_v00_mik.OX382150.1G786.1	Opisthokonta	3	100
Oscarella lobularis	Osclob_v00_mik.OX382150.1G787.1	Eukaryota	2	100
Oscarella lobularis	Osclob_v00_mik.OX382150.1G788.1	Eukaryota	2	80
Oscarella lobularis	Osclob_v00_mik.OX382150.1G790.1	Eukaryota	2	100
Oscarella lobularis	Osclob_v00_mik.OX382150.1G791.1	Homosclerophorida	6	100
Oscarella lobularis	Osclob_v00_mik.OX382150.1G79.1	cellular organisms	1	100
Oscarella lobularis	Osclob_v00_mik.OX382150.1G792.1	Eukaryota	2	100
Oscarella lobularis	Osclob_v00_mik.OX382150.1G793.1	cellular organisms	1	100
Oscarella lobularis	Osclob_v00_mik.OX382150.1G794.1	Homosclerophorida	6	100
Oscarella lobularis	Osclob_v00_mik.OX382150.1G795.1	Homosclerophorida	6	100
Oscarella lobularis	Osclob_v00_mik.OX382150.1G796.1	Oscarella lobularis	7	100
Oscarella lobularis	Osclob_v00_mik.OX382150.1G797.2	Homosclerophorida	6	100
Oscarella lobularis	Osclob_v00_mik.OX382150.1G798.1	Homosclerophorida	6	100
Oscarella lobularis	Osclob_v00_mik.OX382150.1G799.1	cellular organisms	1	100
Oscarella lobularis	Osclob_v00_mik.OX382150.1G801.1	Opisthokonta	3	100
Oscarella lobularis	Osclob_v00_mik.OX382150.1G80.1	cellular organisms	1	100
Oscarella lobularis	Osclob_v00_mik.OX382150.1G802.1	Homosclerophorida	6	100
Oscarella lobularis	Osclob_v00_mik.OX382150.1G803.1	cellular organisms	1	100
Oscarella lobularis	Osclob_v00_mik.OX382150.1G804.1	Oscarella lobularis	7	100
Oscarella lobularis	Osclob_v00_mik.OX382150.1G805.1	cellular organisms	1	100
Oscarella lobularis	Osclob_v00_mik.OX382150.1G806.1	Oscarella lobularis	7	100
Oscarella lobularis	Osclob_v00_mik.OX382150.1G807.1	Metazoa	4	66
Oscarella lobularis	Osclob_v00_mik.OX382150.1G808.1	Oscarella lobularis	7	100
Oscarella lobularis	Osclob_v00_mik.OX382150.1G809.1	Homosclerophorida	6	100
Oscarella lobularis	Osclob_v00_mik.OX382150.1G810.1	cellular organisms	1	100
Oscarella lobularis	Osclob_v00_mik.OX382150.1G81.1	cellular organisms	1	100
Oscarella lobularis	Osclob_v00_mik.OX382150.1G812.1	cellular organisms	1	100
Oscarella lobularis	Osclob_v00_mik.OX382150.1G813.1	cellular organisms	1	66
Oscarella lobularis	Osclob_v00_mik.OX382150.1G814.1	cellular organisms	1	100
Oscarella lobularis	Osclob_v00_mik.OX382150.1G815.1	cellular organisms	1	100
Oscarella lobularis	Osclob_v00_mik.OX382150.1G816.1	Oscarella lobularis	7	100
Oscarella lobularis	Osclob_v00_mik.OX382150.1G817.1	cellular organisms	1	100
Oscarella lobularis	Osclob_v00_mik.OX382150.1G818.1	cellular organisms	1	100
Oscarella lobularis	Osclob_v00_mik.OX382150.1G819.1	Metazoa	4	100
Oscarella lobularis	Osclob_v00_mik.OX382150.1G820.1	cellular organisms	1	100
Oscarella lobularis	Osclob_v00_mik.OX382150.1G821.1	Oscarella lobularis	7	100
Oscarella lobularis	Osclob_v00_mik.OX382150.1G82.1	cellular organisms	1	100
Oscarella lobularis	Osclob_v00_mik.OX382150.1G822.1	Eukaryota	2	100
Oscarella lobularis	Osclob_v00_mik.OX382150.1G823.1	cellular organisms	1	83
Oscarella lobularis	Osclob_v00_mik.OX382150.1G824.1	Oscarella lobularis	7	100
Oscarella lobularis	Osclob_v00_mik.OX382150.1G825.1	Eukaryota	2	80
Oscarella lobularis	Osclob_v00_mik.OX382150.1G826.1	cellular organisms	1	100
Oscarella lobularis	Osclob_v00_mik.OX382150.1G827.1	cellular organisms	1	100
Oscarella lobularis	Osclob_v00_mik.OX382150.1G828.1	Homosclerophorida	6	100
Oscarella lobularis	Osclob_v00_mik.OX382150.1G830.1	Homosclerophorida	6	100
Oscarella lobularis	Osclob_v00_mik.OX382150.1G831.1	cellular organisms	1	100
Oscarella lobularis	Osclob_v00_mik.OX382150.1G83.1	cellular organisms	1	100
Oscarella lobularis	Osclob_v00_mik.OX382150.1G832.1	cellular organisms	1	100
Oscarella lobularis	Osclob_v00_mik.OX382150.1G833.1	cellular organisms	1	100
Oscarella lobularis	Osclob_v00_mik.OX382150.1G834.1	cellular organisms	1	100
Oscarella lobularis	Osclob_v00_mik.OX382150.1G835.1	Homosclerophorida	6	100
Oscarella lobularis	Osclob_v00_mik.OX382150.1G836.1	cellular organisms	1	100
Oscarella lobularis	Osclob_v00_mik.OX382150.1G837.1	cellular organisms	1	100
Oscarella lobularis	Osclob_v00_mik.OX382150.1G838.1	Metazoa	4	100
Oscarella lobularis	Osclob_v00_mik.OX382150.1G839.1	Eukaryota	2	100
Oscarella lobularis	Osclob_v00_mik.OX382150.1G840.1	Eukaryota	2	100
Oscarella lobularis	Osclob_v00_mik.OX382150.1G841.1	Oscarella lobularis	7	100
Oscarella lobularis	Osclob_v00_mik.OX382150.1G84.1	cellular organisms	1	100
Oscarella lobularis	Osclob_v00_mik.OX382150.1G842.1	cellular organisms	1	100
Oscarella lobularis	Osclob_v00_mik.OX382150.1G843.1	Oscarella lobularis	7	100
Oscarella lobularis	Osclob_v00_mik.OX382150.1G844.1	cellular organisms	1	100
Oscarella lobularis	Osclob_v00_mik.OX382150.1G845.1	Oscarella lobularis	7	100
Oscarella lobularis	Osclob_v00_mik.OX382150.1G846.1	Eukaryota	2	100
Oscarella lobularis	Osclob_v00_mik.OX382150.1G847.1	cellular organisms	1	100
Oscarella lobularis	Osclob_v00_mik.OX382150.1G848.1	Oscarella lobularis	7	100
Oscarella lobularis	Osclob_v00_mik.OX382150.1G849.1	Oscarella lobularis	7	100
Oscarella lobularis	Osclob_v00_mik.OX382150.1G850.2	Oscarella lobularis	7	100
Oscarella lobularis	Osclob_v00_mik.OX382150.1G851.1	cellular organisms	1	100
Oscarella lobularis	Osclob_v00_mik.OX382150.1G85.1	Oscarella lobularis	7	100
Oscarella lobularis	Osclob_v00_mik.OX382150.1G852.1	Oscarella lobularis	7	100
Oscarella lobularis	Osclob_v00_mik.OX382150.1G853.1	Eukaryota	2	100
Oscarella lobularis	Osclob_v00_mik.OX382150.1G854.1	cellular organisms	1	100
Oscarella lobularis	Osclob_v00_mik.OX382150.1G855.1	Eukaryota	2	80
Oscarella lobularis	Osclob_v00_mik.OX382150.1G856.2	Opisthokonta	3	100
Oscarella lobularis	Osclob_v00_mik.OX382150.1G857.1	Metazoa	4	100
Oscarella lobularis	Osclob_v00_mik.OX382150.1G858.1	Oscarella lobularis	7	100
Oscarella lobularis	Osclob_v00_mik.OX382150.1G859.1	Oscarella lobularis	7	100
Oscarella lobularis	Osclob_v00_mik.OX382150.1G860.1	Oscarella lobularis	7	100
Oscarella lobularis	Osclob_v00_mik.OX382150.1G861.1	Homosclerophorida	6	100
Oscarella lobularis	Osclob_v00_mik.OX382150.1G86.1	cellular organisms	1	100
Oscarella lobularis	Osclob_v00_mik.OX382150.1G862.1	Oscarella lobularis	7	100
Oscarella lobularis	Osclob_v00_mik.OX382150.1G863.1	Porifera	5	100
Oscarella lobularis	Osclob_v00_mik.OX382150.1G864.1	cellular organisms	1	100
Oscarella lobularis	Osclob_v00_mik.OX382150.1G865.1	cellular organisms	1	100
Oscarella lobularis	Osclob_v00_mik.OX382150.1G866.1	Metazoa	4	100
Oscarella lobularis	Osclob_v00_mik.OX382150.1G867.1	Eukaryota	2	100
Oscarella lobularis	Osclob_v00_mik.OX382150.1G868.1	Eukaryota	2	100
Oscarella lobularis	Osclob_v00_mik.OX382150.1G869.2	Metazoa	4	100
Oscarella lobularis	Osclob_v00_mik.OX382150.1G871.1	Eukaryota	2	100
Oscarella lobularis	Osclob_v00_mik.OX382150.1G87.1	Oscarella lobularis	7	100
Oscarella lobularis	Osclob_v00_mik.OX382150.1G872.1	Eukaryota	2	100
Oscarella lobularis	Osclob_v00_mik.OX382150.1G873.1	Oscarella lobularis	7	100
Oscarella lobularis	Osclob_v00_mik.OX382150.1G874.1	cellular organisms	1	100
Oscarella lobularis	Osclob_v00_mik.OX382150.1G875.1	cellular organisms	1	83
Oscarella lobularis	Osclob_v00_mik.OX382150.1G876.1	Oscarella lobularis	7	100
Oscarella lobularis	Osclob_v00_mik.OX382150.1G877.1	Homosclerophorida	6	100
Oscarella lobularis	Osclob_v00_mik.OX382150.1G878.1	Oscarella lobularis	7	100
Oscarella lobularis	Osclob_v00_mik.OX382150.1G879.1	Homosclerophorida	6	100
Oscarella lobularis	Osclob_v00_mik.OX382150.1G880.1	Metazoa	4	100
Oscarella lobularis	Osclob_v00_mik.OX382150.1G881.1	Metazoa	4	66
Oscarella lobularis	Osclob_v00_mik.OX382150.1G88.1	cellular organisms	1	100
Oscarella lobularis	Osclob_v00_mik.OX382150.1G882.1	Homosclerophorida	6	100
Oscarella lobularis	Osclob_v00_mik.OX382150.1G883.1	Homosclerophorida	6	100
Oscarella lobularis	Osclob_v00_mik.OX382150.1G884.1	Metazoa	4	66
Oscarella lobularis	Osclob_v00_mik.OX382150.1G885.1	Homosclerophorida	6	100
Oscarella lobularis	Osclob_v00_mik.OX382150.1G886.1	Metazoa	4	100
Oscarella lobularis	Osclob_v00_mik.OX382150.1G887.1	Homosclerophorida	6	100
Oscarella lobularis	Osclob_v00_mik.OX382150.1G888.1	Metazoa	4	66
Oscarella lobularis	Osclob_v00_mik.OX382150.1G889.1	Oscarella lobularis	7	100
Oscarella lobularis	Osclob_v00_mik.OX382150.1G890.1	Metazoa	4	66
Oscarella lobularis	Osclob_v00_mik.OX382150.1G891.1	Oscarella lobularis	7	100
Oscarella lobularis	Osclob_v00_mik.OX382150.1G89.1	cellular organisms	1	100
Oscarella lobularis	Osclob_v00_mik.OX382150.1G892.1	Metazoa	4	66
Oscarella lobularis	Osclob_v00_mik.OX382150.1G893.1	Metazoa	4	100
Oscarella lobularis	Osclob_v00_mik.OX382150.1G894.1	cellular organisms	1	100
Oscarella lobularis	Osclob_v00_mik.OX382150.1G895.1	cellular organisms	1	100
Oscarella lobularis	Osclob_v00_mik.OX382150.1G896.1	Metazoa	4	100
Oscarella lobularis	Osclob_v00_mik.OX382150.1G897.1	Oscarella lobularis	7	100
Oscarella lobularis	Osclob_v00_mik.OX382150.1G898.1	Oscarella lobularis	7	100
Oscarella lobularis	Osclob_v00_mik.OX382150.1G900.1	Oscarella lobularis	7	100
Oscarella lobularis	Osclob_v00_mik.OX382150.1G90.1	cellular organisms	1	100
Oscarella lobularis	Osclob_v00_mik.OX382150.1G902.1	Oscarella lobularis	7	100
Oscarella lobularis	Osclob_v00_mik.OX382150.1G903.1	Oscarella lobularis	7	100
Oscarella lobularis	Osclob_v00_mik.OX382150.1G904.1	Oscarella lobularis	7	100
Oscarella lobularis	Osclob_v00_mik.OX382150.1G905.1	Metazoa	4	100
Oscarella lobularis	Osclob_v00_mik.OX382150.1G906.1	cellular organisms	1	83
Oscarella lobularis	Osclob_v00_mik.OX382150.1G907.1	Metazoa	4	100
Oscarella lobularis	Osclob_v00_mik.OX382150.1G908.1	Metazoa	4	100
Oscarella lobularis	Osclob_v00_mik.OX382150.1G909.1	cellular organisms	1	83
Oscarella lobularis	Osclob_v00_mik.OX382150.1G910.1	cellular organisms	1	100
Oscarella lobularis	Osclob_v00_mik.OX382150.1G911.1	Oscarella lobularis	7	100
Oscarella lobularis	Osclob_v00_mik.OX382150.1G91.1	cellular organisms	1	100
Oscarella lobularis	Osclob_v00_mik.OX382150.1G912.1	Oscarella lobularis	7	100
Oscarella lobularis	Osclob_v00_mik.OX382150.1G913.1	Oscarella lobularis	7	100
Oscarella lobularis	Osclob_v00_mik.OX382150.1G914.1	cellular organisms	1	66
Oscarella lobularis	Osclob_v00_mik.OX382150.1G915.1	Oscarella lobularis	7	100
Oscarella lobularis	Osclob_v00_mik.OX382150.1G916.1	Oscarella lobularis	7	100
Oscarella lobularis	Osclob_v00_mik.OX382150.1G917.1	Oscarella lobularis	7	100
Oscarella lobularis	Osclob_v00_mik.OX382150.1G918.1	Oscarella lobularis	7	100
Oscarella lobularis	Osclob_v00_mik.OX382150.1G919.1	Oscarella lobularis	7	100
Oscarella lobularis	Osclob_v00_mik.OX382150.1G9.1	cellular organisms	1	66
Oscarella lobularis	Osclob_v00_mik.OX382150.1G920.1	cellular organisms	1	100
Oscarella lobularis	Osclob_v00_mik.OX382150.1G921.2	cellular organisms	1	100
Oscarella lobularis	Osclob_v00_mik.OX382150.1G92.1	Opisthokonta	3	100
Oscarella lobularis	Osclob_v00_mik.OX382150.1G922.1	cellular organisms	1	100
Oscarella lobularis	Osclob_v00_mik.OX382150.1G923.1	cellular organisms	1	83
Oscarella lobularis	Osclob_v00_mik.OX382150.1G924.1	Oscarella lobularis	7	100
Oscarella lobularis	Osclob_v00_mik.OX382150.1G925.1	Oscarella lobularis	7	100
Oscarella lobularis	Osclob_v00_mik.OX382150.1G926.1	Oscarella lobularis	7	100
Oscarella lobularis	Osclob_v00_mik.OX382150.1G927.1	Oscarella lobularis	7	100
Oscarella lobularis	Osclob_v00_mik.OX382150.1G928.2	Homosclerophorida	6	100
Oscarella lobularis	Osclob_v00_mik.OX382150.1G929.1	Oscarella lobularis	7	100
Oscarella lobularis	Osclob_v00_mik.OX382150.1G930.1	cellular organisms	1	66
Oscarella lobularis	Osclob_v00_mik.OX382150.1G931.1	cellular organisms	1	66
Oscarella lobularis	Osclob_v00_mik.OX382150.1G93.1	Eukaryota	2	100
Oscarella lobularis	Osclob_v00_mik.OX382150.1G932.2	cellular organisms	1	66
Oscarella lobularis	Osclob_v00_mik.OX382150.1G933.1	cellular organisms	1	66
Oscarella lobularis	Osclob_v00_mik.OX382150.1G934.1	cellular organisms	1	66
Oscarella lobularis	Osclob_v00_mik.OX382150.1G935.1	Metazoa	4	33
Oscarella lobularis	Osclob_v00_mik.OX382150.1G936.1	cellular organisms	1	100
Oscarella lobularis	Osclob_v00_mik.OX382150.1G937.1	cellular organisms	1	100
Oscarella lobularis	Osclob_v00_mik.OX382150.1G938.1	cellular organisms	1	50
Oscarella lobularis	Osclob_v00_mik.OX382150.1G939.2	Homosclerophorida	6	100
Oscarella lobularis	Osclob_v00_mik.OX382150.1G940.1	Oscarella lobularis	7	100
Oscarella lobularis	Osclob_v00_mik.OX382150.1G94.1	cellular organisms	1	100
Oscarella lobularis	Osclob_v00_mik.OX382150.1G942.1	Oscarella lobularis	7	100
Oscarella lobularis	Osclob_v00_mik.OX382150.1G943.1	Oscarella lobularis	7	100
Oscarella lobularis	Osclob_v00_mik.OX382150.1G944.1	Eukaryota	2	60
Oscarella lobularis	Osclob_v00_mik.OX382150.1G945.1	cellular organisms	1	83
Oscarella lobularis	Osclob_v00_mik.OX382150.1G946.1	Homosclerophorida	6	100
Oscarella lobularis	Osclob_v00_mik.OX382150.1G947.1	cellular organisms	1	83
Oscarella lobularis	Osclob_v00_mik.OX382150.1G948.1	Opisthokonta	3	100
Oscarella lobularis	Osclob_v00_mik.OX382150.1G949.1	Metazoa	4	66
Oscarella lobularis	Osclob_v00_mik.OX382150.1G951.1	Eukaryota	2	100
Oscarella lobularis	Osclob_v00_mik.OX382150.1G95.1	cellular organisms	1	100
Oscarella lobularis	Osclob_v00_mik.OX382150.1G952.1	cellular organisms	1	83
Oscarella lobularis	Osclob_v00_mik.OX382150.1G953.1	Metazoa	4	33
Oscarella lobularis	Osclob_v00_mik.OX382150.1G954.2	cellular organisms	1	83
Oscarella lobularis	Osclob_v00_mik.OX382150.1G955.1	Oscarella lobularis	7	100
Oscarella lobularis	Osclob_v00_mik.OX382150.1G956.1	Eukaryota	2	100
Oscarella lobularis	Osclob_v00_mik.OX382150.1G957.1	Oscarella lobularis	7	100
Oscarella lobularis	Osclob_v00_mik.OX382150.1G959.1	Metazoa	4	33
Oscarella lobularis	Osclob_v00_mik.OX382150.1G960.1	cellular organisms	1	83
Oscarella lobularis	Osclob_v00_mik.OX382150.1G961.1	Metazoa	4	66
Oscarella lobularis	Osclob_v00_mik.OX382150.1G96.1	cellular organisms	1	100
Oscarella lobularis	Osclob_v00_mik.OX382150.1G962.1	Metazoa	4	66
Oscarella lobularis	Osclob_v00_mik.OX382150.1G963.1	cellular organisms	1	33
Oscarella lobularis	Osclob_v00_mik.OX382150.1G964.1	cellular organisms	1	50
Oscarella lobularis	Osclob_v00_mik.OX382150.1G965.1	Oscarella lobularis	7	100
Oscarella lobularis	Osclob_v00_mik.OX382150.1G966.2	Metazoa	4	66
Oscarella lobularis	Osclob_v00_mik.OX382150.1G967.1	cellular organisms	1	66
Oscarella lobularis	Osclob_v00_mik.OX382150.1G968.1	cellular organisms	1	66
Oscarella lobularis	Osclob_v00_mik.OX382150.1G969.1	Oscarella lobularis	7	100
Oscarella lobularis	Osclob_v00_mik.OX382150.1G970.1	cellular organisms	1	50
Oscarella lobularis	Osclob_v00_mik.OX382150.1G97.1	Oscarella lobularis	7	100
Oscarella lobularis	Osclob_v00_mik.OX382150.1G972.1	Metazoa	4	100
Oscarella lobularis	Osclob_v00_mik.OX382150.1G973.1	Metazoa	4	100
Oscarella lobularis	Osclob_v00_mik.OX382150.1G974.1	Metazoa	4	100
Oscarella lobularis	Osclob_v00_mik.OX382150.1G975.1	Porifera	5	100
Oscarella lobularis	Osclob_v00_mik.OX382150.1G977.1	Oscarella lobularis	7	100
Oscarella lobularis	Osclob_v00_mik.OX382150.1G978.1	Metazoa	4	66
Oscarella lobularis	Osclob_v00_mik.OX382150.1G979.1	Metazoa	4	33
Oscarella lobularis	Osclob_v00_mik.OX382150.1G980.1	Oscarella lobularis	7	100
Oscarella lobularis	Osclob_v00_mik.OX382150.1G981.1	Oscarella lobularis	7	100
Oscarella lobularis	Osclob_v00_mik.OX382150.1G98.1	Eukaryota	2	100
Oscarella lobularis	Osclob_v00_mik.OX382150.1G983.1	Homosclerophorida	6	100
Oscarella lobularis	Osclob_v00_mik.OX382150.1G984.1	Oscarella lobularis	7	100
Oscarella lobularis	Osclob_v00_mik.OX382150.1G985.1	Oscarella lobularis	7	100
Oscarella lobularis	Osclob_v00_mik.OX382150.1G986.1	Oscarella lobularis	7	100
Oscarella lobularis	Osclob_v00_mik.OX382150.1G987.1	Metazoa	4	33
Oscarella lobularis	Osclob_v00_mik.OX382150.1G989.1	Oscarella lobularis	7	100
Oscarella lobularis	Osclob_v00_mik.OX382150.1G990.1	Homosclerophorida	6	100
Oscarella lobularis	Osclob_v00_mik.OX382150.1G991.1	Oscarella lobularis	7	100
Oscarella lobularis	Osclob_v00_mik.OX382150.1G99.1	Eukaryota	2	100
Oscarella lobularis	Osclob_v00_mik.OX382150.1G992.1	Oscarella lobularis	7	100
Oscarella lobularis	Osclob_v00_mik.OX382150.1G993.1	cellular organisms	1	100
Oscarella lobularis	Osclob_v00_mik.OX382150.1G995.1	cellular organisms	1	50
Oscarella lobularis	Osclob_v00_mik.OX382150.1G996.1	cellular organisms	1	100
Oscarella lobularis	Osclob_v00_mik.OX382150.1G997.1	cellular organisms	1	100
Oscarella lobularis	Osclob_v00_mik.OX382150.1G998.1	Eukaryota	2	100
Oscarella lobularis	Osclob_v00_mik.OX382151.1G1000.1	cellular organisms	1	83
Oscarella lobularis	Osclob_v00_mik.OX382151.1G1001.1	cellular organisms	1	100
Oscarella lobularis	Osclob_v00_mik.OX382151.1G100.1	Oscarella lobularis	7	100
Oscarella lobularis	Osclob_v00_mik.OX382151.1G1003.1	Eukaryota	2	100
Oscarella lobularis	Osclob_v00_mik.OX382151.1G1005.1	cellular organisms	1	100
Oscarella lobularis	Osclob_v00_mik.OX382151.1G1006.1	cellular organisms	1	100
Oscarella lobularis	Osclob_v00_mik.OX382151.1G1007.1	cellular organisms	1	100
Oscarella lobularis	Osclob_v00_mik.OX382151.1G1008.1	cellular organisms	1	100
Oscarella lobularis	Osclob_v00_mik.OX382151.1G1009.1	Homosclerophorida	6	100
Oscarella lobularis	Osclob_v00_mik.OX382151.1G1010.1	Oscarella lobularis	7	100
Oscarella lobularis	Osclob_v00_mik.OX382151.1G1011.1	Homosclerophorida	6	100
Oscarella lobularis	Osclob_v00_mik.OX382151.1G101.1	cellular organisms	1	100
Oscarella lobularis	Osclob_v00_mik.OX382151.1G1012.1	cellular organisms	1	66
Oscarella lobularis	Osclob_v00_mik.OX382151.1G1013.1	Oscarella lobularis	7	100
Oscarella lobularis	Osclob_v00_mik.OX382151.1G1014.1	cellular organisms	1	100
Oscarella lobularis	Osclob_v00_mik.OX382151.1G1015.1	cellular organisms	1	100
Oscarella lobularis	Osclob_v00_mik.OX382151.1G1016.1	cellular organisms	1	100
Oscarella lobularis	Osclob_v00_mik.OX382151.1G1017.1	cellular organisms	1	100
Oscarella lobularis	Osclob_v00_mik.OX382151.1G1018.1	cellular organisms	1	100
Oscarella lobularis	Osclob_v00_mik.OX382151.1G1019.1	Eukaryota	2	100
Oscarella lobularis	Osclob_v00_mik.OX382151.1G10.1	cellular organisms	1	100
Oscarella lobularis	Osclob_v00_mik.OX382151.1G1020.1	Eukaryota	2	100
[truncated: 103,860 more rows]

## Sheet: C_Relative_SEXgenes_age_24demar
Species	Gene name	Phylostratum	rank	taxonomic_representativeness
Adam	Adami_g12219.t1	Axinella damicornis	9	100
Adam	Adami_g16192.t1	Axinella damicornis	9	100
Adam	Adami_g3575.t1	Axinella damicornis	9	100
Adam	Adami_g4149.t1	Axinella damicornis	9	100
Adam	Adami_g4846.t1	Axinella damicornis	9	100
Adam	Adami_g5531.t1	Axinella damicornis	9	100
Adam	Adami_g9197.t1	Axinella damicornis	9	100
Adam	Adami_g9767.t1	Axinella damicornis	9	100
Adam	Adami_g14077.t1	Axinellidae	8	100
Adam	Adami_g8771.t1	Axinellidae	8	100
Adam	Adami_g9674.t1	Axinellidae	8	100
Pven	PHAVENT1A001633.t1	Axinellidae	8	100
Adam	Adami_g10187.t1	cellular organisms	1	100
Adam	Adami_g10337.t1	cellular organisms	1	87
Adam	Adami_g10341.t1	cellular organisms	1	87
Adam	Adami_g10373.t1	cellular organisms	1	37
Adam	Adami_g10405.t1	cellular organisms	1	100
Adam	Adami_g10422.t1	cellular organisms	1	100
Adam	Adami_g10814.t1	cellular organisms	1	75
Adam	Adami_g1089.t1	cellular organisms	1	100
Adam	Adami_g1104.t1	cellular organisms	1	100
Adam	Adami_g11334.t1	cellular organisms	1	100
Adam	Adami_g11408.t1	cellular organisms	1	100
Adam	Adami_g1144.t1	cellular organisms	1	87
Adam	Adami_g11461.t2	cellular organisms	1	62
Adam	Adami_g11469.t2	cellular organisms	1	62
Adam	Adami_g11778.t1	cellular organisms	1	100
Adam	Adami_g11917.t1	cellular organisms	1	100
Adam	Adami_g12056.t1	cellular organisms	1	100
Adam	Adami_g12287.t1	cellular organisms	1	100
Adam	Adami_g1249.t1	cellular organisms	1	75
Adam	Adami_g12541.t1	cellular organisms	1	62
Adam	Adami_g12652.t1	cellular organisms	1	75
Adam	Adami_g12774.t1	cellular organisms	1	75
Adam	Adami_g12783.t2	cellular organisms	1	100
Adam	Adami_g12816.t2	cellular organisms	1	100
Adam	Adami_g12837.t1	cellular organisms	1	100
Adam	Adami_g12881.t1	cellular organisms	1	100
Adam	Adami_g13033.t1	cellular organisms	1	100
Adam	Adami_g13711.t1	cellular organisms	1	100
Adam	Adami_g14037.t1	cellular organisms	1	100
Adam	Adami_g14955.t1	cellular organisms	1	87
Adam	Adami_g14957.t1	cellular organisms	1	87
Adam	Adami_g15041.t1	cellular organisms	1	100
Adam	Adami_g15046.t1	cellular organisms	1	100
Adam	Adami_g15097.t1	cellular organisms	1	75
Adam	Adami_g15245.t1	cellular organisms	1	100
Adam	Adami_g15291.t1	cellular organisms	1	50
Adam	Adami_g15361.t2	cellular organisms	1	50
Adam	Adami_g15530.t3	cellular organisms	1	100
Adam	Adami_g15553.t2	cellular organisms	1	75
Adam	Adami_g15628.t1	cellular organisms	1	37
Adam	Adami_g15833.t1	cellular organisms	1	100
Adam	Adami_g15868.t1	cellular organisms	1	100
Adam	Adami_g15885.t1	cellular organisms	1	75
Adam	Adami_g15897.t1	cellular organisms	1	100
Adam	Adami_g16137.t1	cellular organisms	1	75
Adam	Adami_g16405.t1	cellular organisms	1	100
Adam	Adami_g16486.t1	cellular organisms	1	100
Adam	Adami_g16639.t1	cellular organisms	1	100
Adam	Adami_g16865.t1	cellular organisms	1	100
Adam	Adami_g17227.t1	cellular organisms	1	100
Adam	Adami_g17228.t1	cellular organisms	1	100
Adam	Adami_g17383.t1	cellular organisms	1	100
Adam	Adami_g17384.t1	cellular organisms	1	100
Adam	Adami_g1975.t1	cellular organisms	1	100
Adam	Adami_g2446.t1	cellular organisms	1	62
Adam	Adami_g2456.t1	cellular organisms	1	100
Adam	Adami_g2480.t1	cellular organisms	1	100
Adam	Adami_g2597.t1	cellular organisms	1	100
Adam	Adami_g2610.t1	cellular organisms	1	100
Adam	Adami_g263.t1	cellular organisms	1	87
Adam	Adami_g2949.t1	cellular organisms	1	100
Adam	Adami_g2959.t1	cellular organisms	1	100
Adam	Adami_g3221.t1	cellular organisms	1	100
Adam	Adami_g3260.t1	cellular organisms	1	100
Adam	Adami_g3513.t1	cellular organisms	1	100
Adam	Adami_g3843.t1	cellular organisms	1	100
Adam	Adami_g3845.t1	cellular organisms	1	100
Adam	Adami_g4144.t1	cellular organisms	1	75
Adam	Adami_g422.t1	cellular organisms	1	100
Adam	Adami_g4359.t1	cellular organisms	1	100
Adam	Adami_g4378.t1	cellular organisms	1	100
Adam	Adami_g4676.t1	cellular organisms	1	100
Adam	Adami_g4797.t1	cellular organisms	1	100
Adam	Adami_g4806.t1	cellular organisms	1	100
Adam	Adami_g4815.t1	cellular organisms	1	75
Adam	Adami_g4886.t1	cellular organisms	1	100
Adam	Adami_g4998.t1	cellular organisms	1	37
Adam	Adami_g5217.t2	cellular organisms	1	100
Adam	Adami_g5239.t1	cellular organisms	1	100
Adam	Adami_g5375.t2	cellular organisms	1	100
Adam	Adami_g5425.t1	cellular organisms	1	50
Adam	Adami_g5594.t1	cellular organisms	1	100
Adam	Adami_g5597.t1	cellular organisms	1	100
Adam	Adami_g5602.t2	cellular organisms	1	100
Adam	Adami_g5663.t1	cellular organisms	1	100
Adam	Adami_g575.t1	cellular organisms	1	100
Adam	Adami_g5884.t1	cellular organisms	1	87
Adam	Adami_g5890.t1	cellular organisms	1	100
Adam	Adami_g600.t1	cellular organisms	1	100
Adam	Adami_g6075.t1	cellular organisms	1	37
Adam	Adami_g6129.t1	cellular organisms	1	100
Adam	Adami_g6212.t1	cellular organisms	1	100
Adam	Adami_g6227.t1	cellular organisms	1	87
Adam	Adami_g6285.t1	cellular organisms	1	37
Adam	Adami_g6317.t1	cellular organisms	1	100
Adam	Adami_g6334.t1	cellular organisms	1	100
Adam	Adami_g6418.t1	cellular organisms	1	100
Adam	Adami_g7270.t1	cellular organisms	1	75
Adam	Adami_g7292.t1	cellular organisms	1	100
Adam	Adami_g7321.t1	cellular organisms	1	100
Adam	Adami_g7555.t1	cellular organisms	1	62
Adam	Adami_g7570.t1	cellular organisms	1	100
Adam	Adami_g7574.t1	cellular organisms	1	100
Adam	Adami_g7617.t1	cellular organisms	1	87
Adam	Adami_g8064.t1	cellular organisms	1	100
Adam	Adami_g8841.t1	cellular organisms	1	100
Adam	Adami_g9638.t1	cellular organisms	1	37
Adam	Adami_g9991.t1	cellular organisms	1	87
Cren	Choren_v00_mik.OX359189.1G1155.1	cellular organisms	1	85
Cren	Choren_v00_mik.OX359189.1G1285.1	cellular organisms	1	85
Cren	Choren_v00_mik.OX359189.1G1405.1	cellular organisms	1	71
Cren	Choren_v00_mik.OX359189.1G1461.1	cellular organisms	1	71
Cren	Choren_v00_mik.OX359189.1G1530.1	cellular organisms	1	85
Cren	Choren_v00_mik.OX359189.1G1636.1	cellular organisms	1	57
Cren	Choren_v00_mik.OX359189.1G1708.1	cellular organisms	1	85
Cren	Choren_v00_mik.OX359189.1G659.1	cellular organisms	1	57
Cren	Choren_v00_mik.OX359189.1G671.1	cellular organisms	1	85
Cren	Choren_v00_mik.OX359189.1G794.1	cellular organisms	1	85
Cren	Choren_v00_mik.OX359189.1G802.1	cellular organisms	1	85
Cren	Choren_v00_mik.OX359189.1G813.1	cellular organisms	1	57
Cren	Choren_v00_mik.OX359189.1G871.1	cellular organisms	1	85
Cren	Choren_v00_mik.OX359189.1G882.1	cellular organisms	1	100
Cren	Choren_v00_mik.OX359189.1G883.1	cellular organisms	1	85
Cren	Choren_v00_mik.OX359189.1G889.1	cellular organisms	1	85
Cren	Choren_v00_mik.OX359189.1G914.1	cellular organisms	1	85
Cren	Choren_v00_mik.OX359189.1G963.1	cellular organisms	1	85
Cren	Choren_v00_mik.OX359190.1G1039.1	cellular organisms	1	85
Cren	Choren_v00_mik.OX359190.1G1097.1	cellular organisms	1	85
Cren	Choren_v00_mik.OX359190.1G1362.1	cellular organisms	1	85
Cren	Choren_v00_mik.OX359190.1G1378.1	cellular organisms	1	57
Cren	Choren_v00_mik.OX359190.1G1431.3	cellular organisms	1	100
Cren	Choren_v00_mik.OX359190.1G1434.1	cellular organisms	1	100
Cren	Choren_v00_mik.OX359190.1G1472.1	cellular organisms	1	100
Cren	Choren_v00_mik.OX359190.1G410.2	cellular organisms	1	57
Cren	Choren_v00_mik.OX359190.1G571.1	cellular organisms	1	85
Cren	Choren_v00_mik.OX359190.1G612.1	cellular organisms	1	85
Cren	Choren_v00_mik.OX359190.1G660.1	cellular organisms	1	100
Cren	Choren_v00_mik.OX359190.1G792.1	cellular organisms	1	85
Cren	Choren_v00_mik.OX359190.1G814.1	cellular organisms	1	85
Cren	Choren_v00_mik.OX359190.1G860.1	cellular organisms	1	85
Cren	Choren_v00_mik.OX359190.1G877.1	cellular organisms	1	71
Cren	Choren_v00_mik.OX359190.1G968.1	cellular organisms	1	71
Cren	Choren_v00_mik.OX359191.1G1213.1	cellular organisms	1	85
Cren	Choren_v00_mik.OX359191.1G123.1	cellular organisms	1	100
Cren	Choren_v00_mik.OX359191.1G280.1	cellular organisms	1	85
Cren	Choren_v00_mik.OX359191.1G405.1	cellular organisms	1	85
Cren	Choren_v00_mik.OX359191.1G421.1	cellular organisms	1	85
Cren	Choren_v00_mik.OX359191.1G476.1	cellular organisms	1	85
Cren	Choren_v00_mik.OX359191.1G489.1	cellular organisms	1	85
Cren	Choren_v00_mik.OX359191.1G545.1	cellular organisms	1	100
Cren	Choren_v00_mik.OX359191.1G585.1	cellular organisms	1	85
Cren	Choren_v00_mik.OX359191.1G625.1	cellular organisms	1	100
Cren	Choren_v00_mik.OX359191.1G81.1	cellular organisms	1	85
Cren	Choren_v00_mik.OX359191.1G840.1	cellular organisms	1	85
Cren	Choren_v00_mik.OX359192.1G1046.1	cellular organisms	1	71
Cren	Choren_v00_mik.OX359192.1G1172.1	cellular organisms	1	100
Cren	Choren_v00_mik.OX359192.1G1378.1	cellular organisms	1	100
Cren	Choren_v00_mik.OX359192.1G176.1	cellular organisms	1	100
Cren	Choren_v00_mik.OX359192.1G181.1	cellular organisms	1	85
Cren	Choren_v00_mik.OX359192.1G264.2	cellular organisms	1	85
Cren	Choren_v00_mik.OX359192.1G318.1	cellular organisms	1	85
Cren	Choren_v00_mik.OX359192.1G376.1	cellular organisms	1	85
Cren	Choren_v00_mik.OX359192.1G405.1	cellular organisms	1	71
Cren	Choren_v00_mik.OX359192.1G447.1	cellular organisms	1	100
Cren	Choren_v00_mik.OX359192.1G506.1	cellular organisms	1	85
Cren	Choren_v00_mik.OX359192.1G511.1	cellular organisms	1	57
Cren	Choren_v00_mik.OX359192.1G520.1	cellular organisms	1	85
Cren	Choren_v00_mik.OX359192.1G537.1	cellular organisms	1	85
Cren	Choren_v00_mik.OX359192.1G556.1	cellular organisms	1	85
Cren	Choren_v00_mik.OX359192.1G667.1	cellular organisms	1	57
Cren	Choren_v00_mik.OX359192.1G680.1	cellular organisms	1	85
Cren	Choren_v00_mik.OX359192.1G823.1	cellular organisms	1	85
Cren	Choren_v00_mik.OX359193.1G1006.1	cellular organisms	1	85
Cren	Choren_v00_mik.OX359193.1G1224.1	cellular organisms	1	100
Cren	Choren_v00_mik.OX359193.1G1289.2	cellular organisms	1	85
Cren	Choren_v00_mik.OX359193.1G1348.1	cellular organisms	1	85
Cren	Choren_v00_mik.OX359193.1G1459.1	cellular organisms	1	85
Cren	Choren_v00_mik.OX359193.1G1482.1	cellular organisms	1	85
Cren	Choren_v00_mik.OX359193.1G16.1	cellular organisms	1	100
Cren	Choren_v00_mik.OX359193.1G452.1	cellular organisms	1	71
Cren	Choren_v00_mik.OX359193.1G695.1	cellular organisms	1	85
Cren	Choren_v00_mik.OX359193.1G719.1	cellular organisms	1	85
Cren	Choren_v00_mik.OX359193.1G728.1	cellular organisms	1	85
Cren	Choren_v00_mik.OX359193.1G885.1	cellular organisms	1	57
Cren	Choren_v00_mik.OX359193.1G887.1	cellular organisms	1	42
Cren	Choren_v00_mik.OX359193.1G904.1	cellular organisms	1	42
Cren	Choren_v00_mik.OX359193.1G915.1	cellular organisms	1	42
Cren	Choren_v00_mik.OX359194.1G1033.1	cellular organisms	1	100
Cren	Choren_v00_mik.OX359194.1G105.1	cellular organisms	1	100
Cren	Choren_v00_mik.OX359194.1G113.1	cellular organisms	1	100
Cren	Choren_v00_mik.OX359194.1G173.1	cellular organisms	1	100
Cren	Choren_v00_mik.OX359194.1G216.1	cellular organisms	1	42
Cren	Choren_v00_mik.OX359194.1G274.1	cellular organisms	1	85
Cren	Choren_v00_mik.OX359194.1G364.1	cellular organisms	1	85
Cren	Choren_v00_mik.OX359194.1G428.1	cellular organisms	1	100
Cren	Choren_v00_mik.OX359194.1G515.1	cellular organisms	1	85
Cren	Choren_v00_mik.OX359194.1G526.1	cellular organisms	1	85
Cren	Choren_v00_mik.OX359194.1G553.2	cellular organisms	1	100
Cren	Choren_v00_mik.OX359194.1G561.1	cellular organisms	1	85
Cren	Choren_v00_mik.OX359194.1G562.2	cellular organisms	1	85
Cren	Choren_v00_mik.OX359194.1G637.1	cellular organisms	1	85
Cren	Choren_v00_mik.OX359194.1G66.1	cellular organisms	1	57
Cren	Choren_v00_mik.OX359194.1G767.1	cellular organisms	1	100
Cren	Choren_v00_mik.OX359194.1G78.1	cellular organisms	1	85
Cren	Choren_v00_mik.OX359194.1G836.1	cellular organisms	1	100
Cren	Choren_v00_mik.OX359194.1G954.1	cellular organisms	1	100
Cren	Choren_v00_mik.OX359194.1G955.1	cellular organisms	1	100
Cren	Choren_v00_mik.OX359194.1G969.1	cellular organisms	1	85
Cren	Choren_v00_mik.OX359194.1G988.1	cellular organisms	1	85
Cren	Choren_v00_mik.OX359194.1G997.1	cellular organisms	1	85
Cren	Choren_v00_mik.OX359194.1G998.1	cellular organisms	1	85
Cren	Choren_v00_mik.OX359195.1G1107.1	cellular organisms	1	85
Cren	Choren_v00_mik.OX359195.1G21.1	cellular organisms	1	85
Cren	Choren_v00_mik.OX359195.1G219.1	cellular organisms	1	85
Cren	Choren_v00_mik.OX359195.1G225.1	cellular organisms	1	100
Cren	Choren_v00_mik.OX359195.1G314.1	cellular organisms	1	57
Cren	Choren_v00_mik.OX359195.1G35.1	cellular organisms	1	42
Cren	Choren_v00_mik.OX359195.1G500.1	cellular organisms	1	85
Cren	Choren_v00_mik.OX359195.1G510.1	cellular organisms	1	85
Cren	Choren_v00_mik.OX359195.1G585.1	cellular organisms	1	71
Cren	Choren_v00_mik.OX359195.1G70.1	cellular organisms	1	100
Cren	Choren_v00_mik.OX359195.1G786.1	cellular organisms	1	100
Cren	Choren_v00_mik.OX359195.1G863.1	cellular organisms	1	85
Cren	Choren_v00_mik.OX359195.1G867.1	cellular organisms	1	85
Cren	Choren_v00_mik.OX359195.1G882.1	cellular organisms	1	85
Cren	Choren_v00_mik.OX359195.1G890.1	cellular organisms	1	85
Cren	Choren_v00_mik.OX359195.1G892.1	cellular organisms	1	85
Cren	Choren_v00_mik.OX359195.1G894.1	cellular organisms	1	85
Cren	Choren_v00_mik.OX359195.1G98.1	cellular organisms	1	57
Cren	Choren_v00_mik.OX359195.1G986.1	cellular organisms	1	85
Cren	Choren_v00_mik.OX359196.1G1069.1	cellular organisms	1	85
Cren	Choren_v00_mik.OX359196.1G1087.1	cellular organisms	1	71
Cren	Choren_v00_mik.OX359196.1G1139.1	cellular organisms	1	85
Cren	Choren_v00_mik.OX359196.1G1150.1	cellular organisms	1	85
Cren	Choren_v00_mik.OX359196.1G218.1	cellular organisms	1	85
Cren	Choren_v00_mik.OX359196.1G230.1	cellular organisms	1	85
Cren	Choren_v00_mik.OX359196.1G267.1	cellular organisms	1	85
Cren	Choren_v00_mik.OX359196.1G275.1	cellular organisms	1	100
Cren	Choren_v00_mik.OX359196.1G313.1	cellular organisms	1	85
Cren	Choren_v00_mik.OX359196.1G410.1	cellular organisms	1	85
Cren	Choren_v00_mik.OX359196.1G475.1	cellular organisms	1	85
Cren	Choren_v00_mik.OX359196.1G592.1	cellular organisms	1	85
Cren	Choren_v00_mik.OX359196.1G881.1	cellular organisms	1	85
Cren	Choren_v00_mik.OX359196.1G945.1	cellular organisms	1	85
Cren	Choren_v00_mik.OX359197.1G1054.1	cellular organisms	1	100
Cren	Choren_v00_mik.OX359197.1G128.1	cellular organisms	1	85
Cren	Choren_v00_mik.OX359197.1G156.1	cellular organisms	1	85
Cren	Choren_v00_mik.OX359197.1G309.1	cellular organisms	1	100
Cren	Choren_v00_mik.OX359197.1G434.1	cellular organisms	1	85
Cren	Choren_v00_mik.OX359197.1G451.1	cellular organisms	1	71
Cren	Choren_v00_mik.OX359197.1G452.1	cellular organisms	1	85
Cren	Choren_v00_mik.OX359197.1G454.1	cellular organisms	1	85
Cren	Choren_v00_mik.OX359197.1G457.1	cellular organisms	1	85
Cren	Choren_v00_mik.OX359197.1G594.1	cellular organisms	1	85
Cren	Choren_v00_mik.OX359197.1G631.1	cellular organisms	1	42
Cren	Choren_v00_mik.OX359197.1G645.1	cellular organisms	1	100
Cren	Choren_v00_mik.OX359197.1G648.1	cellular organisms	1	100
Cren	Choren_v00_mik.OX359197.1G650.1	cellular organisms	1	100
Cren	Choren_v00_mik.OX359197.1G724.1	cellular organisms	1	100
Cren	Choren_v00_mik.OX359197.1G725.1	cellular organisms	1	100
Cren	Choren_v00_mik.OX359197.1G745.1	cellular organisms	1	100
Cren	Choren_v00_mik.OX359197.1G750.1	cellular organisms	1	85
Cren	Choren_v00_mik.OX359197.1G793.1	cellular organisms	1	85
Cren	Choren_v00_mik.OX359197.1G913.1	cellular organisms	1	85
Cren	Choren_v00_mik.OX359198.1G135.1	cellular organisms	1	85
Cren	Choren_v00_mik.OX359198.1G181.1	cellular organisms	1	85
Cren	Choren_v00_mik.OX359198.1G275.1	cellular organisms	1	85
Cren	Choren_v00_mik.OX359198.1G474.1	cellular organisms	1	85
Cren	Choren_v00_mik.OX359198.1G652.1	cellular organisms	1	71
Cren	Choren_v00_mik.OX359198.1G74.1	cellular organisms	1	100
Cren	Choren_v00_mik.OX359198.1G767.1	cellular organisms	1	100
Cren	Choren_v00_mik.OX359198.1G817.1	cellular organisms	1	71
Cren	Choren_v00_mik.OX359198.1G818.1	cellular organisms	1	100
Cren	Choren_v00_mik.OX359198.1G905.1	cellular organisms	1	85
Cren	Choren_v00_mik.OX359198.1G921.1	cellular organisms	1	85
Cren	Choren_v00_mik.OX359199.1G240.1	cellular organisms	1	85
Cren	Choren_v00_mik.OX359199.1G280.1	cellular organisms	1	85
Cren	Choren_v00_mik.OX359199.1G306.1	cellular organisms	1	100
Cren	Choren_v00_mik.OX359199.1G307.1	cellular organisms	1	100
Cren	Choren_v00_mik.OX359199.1G311.1	cellular organisms	1	100
Cren	Choren_v00_mik.OX359199.1G315.1	cellular organisms	1	85
Cren	Choren_v00_mik.OX359199.1G325.1	cellular organisms	1	100
Cren	Choren_v00_mik.OX359199.1G331.2	cellular organisms	1	100
Cren	Choren_v00_mik.OX359199.1G368.1	cellular organisms	1	100
Cren	Choren_v00_mik.OX359199.1G370.1	cellular organisms	1	85
Cren	Choren_v00_mik.OX359199.1G378.1	cellular organisms	1	100
Cren	Choren_v00_mik.OX359199.1G431.1	cellular organisms	1	85
Cren	Choren_v00_mik.OX359199.1G464.1	cellular organisms	1	85
Cren	Choren_v00_mik.OX359199.1G470.1	cellular organisms	1	85
Cren	Choren_v00_mik.OX359199.1G473.1	cellular organisms	1	100
Cren	Choren_v00_mik.OX359199.1G530.2	cellular organisms	1	100
Cren	Choren_v00_mik.OX359199.1G632.1	cellular organisms	1	85
Cren	Choren_v00_mik.OX359199.1G851.1	cellular organisms	1	71
Cren	Choren_v00_mik.OX359200.1G133.1	cellular organisms	1	85
Cren	Choren_v00_mik.OX359200.1G153.1	cellular organisms	1	85
Cren	Choren_v00_mik.OX359200.1G279.1	cellular organisms	1	85
Cren	Choren_v00_mik.OX359200.1G313.1	cellular organisms	1	85
Cren	Choren_v00_mik.OX359200.1G356.1	cellular organisms	1	100
Cren	Choren_v00_mik.OX359200.1G514.1	cellular organisms	1	85
Cren	Choren_v00_mik.OX359200.1G565.1	cellular organisms	1	100
Cren	Choren_v00_mik.OX359200.1G623.1	cellular organisms	1	85
Cren	Choren_v00_mik.OX359200.1G755.1	cellular organisms	1	85
Cren	Choren_v00_mik.OX359200.1G829.1	cellular organisms	1	100
Cren	Choren_v00_mik.OX359200.1G926.1	cellular organisms	1	100
Cren	Choren_v00_mik.OX359200.1G974.1	cellular organisms	1	100
Cren	Choren_v00_mik.OX359201.1G143.1	cellular organisms	1	85
Cren	Choren_v00_mik.OX359201.1G203.1	cellular organisms	1	85
Cren	Choren_v00_mik.OX359201.1G304.1	cellular organisms	1	85
Cren	Choren_v00_mik.OX359201.1G307.1	cellular organisms	1	71
Cren	Choren_v00_mik.OX359201.1G316.1	cellular organisms	1	100
Cren	Choren_v00_mik.OX359201.1G325.2	cellular organisms	1	100
Cren	Choren_v00_mik.OX359201.1G330.1	cellular organisms	1	100
Cren	Choren_v00_mik.OX359201.1G342.1	cellular organisms	1	85
Cren	Choren_v00_mik.OX359201.1G358.1	cellular organisms	1	71
Cren	Choren_v00_mik.OX359201.1G367.1	cellular organisms	1	71
Cren	Choren_v00_mik.OX359201.1G370.1	cellular organisms	1	71
Cren	Choren_v00_mik.OX359201.1G371.1	cellular organisms	1	71
Cren	Choren_v00_mik.OX359201.1G372.1	cellular organisms	1	71
Cren	Choren_v00_mik.OX359201.1G380.1	cellular organisms	1	100
Cren	Choren_v00_mik.OX359201.1G42.1	cellular organisms	1	85
Cren	Choren_v00_mik.OX359201.1G463.1	cellular organisms	1	85
Cren	Choren_v00_mik.OX359201.1G515.1	cellular organisms	1	85
Cren	Choren_v00_mik.OX359201.1G520.1	cellular organisms	1	100
Cren	Choren_v00_mik.OX359201.1G531.1	cellular organisms	1	85
Cren	Choren_v00_mik.OX359201.1G535.1	cellular organisms	1	85
Cren	Choren_v00_mik.OX359201.1G588.1	cellular organisms	1	85
Cren	Choren_v00_mik.OX359201.1G860.1	cellular organisms	1	85
Cren	Choren_v00_mik.OX359201.1G869.1	cellular organisms	1	85
Cren	Choren_v00_mik.OX359201.1G872.1	cellular organisms	1	100
Cren	Choren_v00_mik.OX359201.1G896.1	cellular organisms	1	85
Cren	Choren_v00_mik.OX359201.1G975.1	cellular organisms	1	85
Cren	Choren_v00_mik.OX359202.1G395.1	cellular organisms	1	100
Cren	Choren_v00_mik.OX359202.1G420.1	cellular organisms	1	71
Cren	Choren_v00_mik.OX359202.1G465.1	cellular organisms	1	85
Cren	Choren_v00_mik.OX359202.1G484.1	cellular organisms	1	85
Cren	Choren_v00_mik.OX359202.1G585.1	cellular organisms	1	85
Cren	Choren_v00_mik.OX359202.1G712.1	cellular organisms	1	85
Cren	Choren_v00_mik.OX359202.1G877.2	cellular organisms	1	85
Cren	Choren_v00_mik.OX359202.1G959.1	cellular organisms	1	85
Hpan	Hpan_g10762.t1	cellular organisms	1	87
Hpan	Hpan_g11119.t1	cellular organisms	1	100
Hpan	Hpan_g11121.t1	cellular organisms	1	87
Hpan	Hpan_g11175.t1	cellular organisms	1	87
Hpan	Hpan_g11381.t1	cellular organisms	1	100
Hpan	Hpan_g11396.t1	cellular organisms	1	87
Hpan	Hpan_g12055.t1	cellular organisms	1	87
Hpan	Hpan_g12220.t1	cellular organisms	1	100
Hpan	Hpan_g1236.t1	cellular organisms	1	87
Hpan	Hpan_g12689.t1	cellular organisms	1	87
Hpan	Hpan_g12715.t1	cellular organisms	1	50
Hpan	Hpan_g13730.t1	cellular organisms	1	87
Hpan	Hpan_g1397.t1	cellular organisms	1	87
Hpan	Hpan_g14000.t1	cellular organisms	1	87
Hpan	Hpan_g14851.t1	cellular organisms	1	87
Hpan	Hpan_g15009.t1	cellular organisms	1	62
Hpan	Hpan_g15675.t1	cellular organisms	1	100
Hpan	Hpan_g15716.t1	cellular organisms	1	87
Hpan	Hpan_g1666.t1	cellular organisms	1	50
Hpan	Hpan_g2282.t1	cellular organisms	1	100
Hpan	Hpan_g2345.t1	cellular organisms	1	87
Hpan	Hpan_g2538.t1	cellular organisms	1	87
Hpan	Hpan_g3026.t1	cellular organisms	1	87
Hpan	Hpan_g3333.t1	cellular organisms	1	62
Hpan	Hpan_g3501.t1	cellular organisms	1	62
Hpan	Hpan_g3503.t1	cellular organisms	1	62
Hpan	Hpan_g3542.t1	cellular organisms	1	100
Hpan	Hpan_g3634.t1	cellular organisms	1	100
Hpan	Hpan_g3810.t1	cellular organisms	1	87
Hpan	Hpan_g436.t1	cellular organisms	1	87
Hpan	Hpan_g4632.t1	cellular organisms	1	37
Hpan	Hpan_g6609.t1	cellular organisms	1	87
Hpan	Hpan_g7629.t1	cellular organisms	1	87
Hpan	Hpan_g8253.t1	cellular organisms	1	62
Hpan	Hpan_g8732.t1	cellular organisms	1	62
Hpan	Hpan_g8996.t1	cellular organisms	1	87
Hpan	Hpan_g9234.t1	cellular organisms	1	87
Hpan	Hpan_g9470.t1	cellular organisms	1	100
Olob	Osclob_v00_mik.CANNPT010000001.1G11.1	cellular organisms	1	100
Olob	Osclob_v00_mik.OX382150.1G1128.1	cellular organisms	1	100
Olob	Osclob_v00_mik.OX382150.1G1443.2	cellular organisms	1	66
Olob	Osclob_v00_mik.OX382150.1G1476.1	cellular organisms	1	83
Olob	Osclob_v00_mik.OX382150.1G1477.1	cellular organisms	1	100
Olob	Osclob_v00_mik.OX382150.1G1479.1	cellular organisms	1	33
Olob	Osclob_v00_mik.OX382150.1G1568.1	cellular organisms	1	100
Olob	Osclob_v00_mik.OX382150.1G1578.1	cellular organisms	1	50
Olob	Osclob_v00_mik.OX382150.1G1609.1	cellular organisms	1	83
Olob	Osclob_v00_mik.OX382150.1G165.1	cellular organisms	1	100
Olob	Osclob_v00_mik.OX382150.1G1676.1	cellular organisms	1	100
Olob	Osclob_v00_mik.OX382150.1G1678.1	cellular organisms	1	100
Olob	Osclob_v00_mik.OX382150.1G200.1	cellular organisms	1	100
Olob	Osclob_v00_mik.OX382150.1G2017.1	cellular organisms	1	100
Olob	Osclob_v00_mik.OX382150.1G2051.1	cellular organisms	1	100
Olob	Osclob_v00_mik.OX382150.1G2052.1	cellular organisms	1	100
Olob	Osclob_v00_mik.OX382150.1G2107.1	cellular organisms	1	83
Olob	Osclob_v00_mik.OX382150.1G2137.2	cellular organisms	1	100
Olob	Osclob_v00_mik.OX382150.1G2167.1	cellular organisms	1	66
Olob	Osclob_v00_mik.OX382150.1G2190.1	cellular organisms	1	100
Olob	Osclob_v00_mik.OX382150.1G306.1	cellular organisms	1	100
Olob	Osclob_v00_mik.OX382150.1G309.1	cellular organisms	1	100
Olob	Osclob_v00_mik.OX382150.1G393.1	cellular organisms	1	100
Olob	Osclob_v00_mik.OX382150.1G494.1	cellular organisms	1	100
Olob	Osclob_v00_mik.OX382150.1G496.1	cellular organisms	1	100
Olob	Osclob_v00_mik.OX382150.1G497.1	cellular organisms	1	100
Olob	Osclob_v00_mik.OX382150.1G619.1	cellular organisms	1	100
Olob	Osclob_v00_mik.OX382150.1G702.1	cellular organisms	1	100
Olob	Osclob_v00_mik.OX382150.1G722.1	cellular organisms	1	100
Olob	Osclob_v00_mik.OX382150.1G74.1	cellular organisms	1	100
Olob	Osclob_v00_mik.OX382150.1G803.1	cellular organisms	1	100
Olob	Osclob_v00_mik.OX382150.1G812.1	cellular organisms	1	100
Olob	Osclob_v00_mik.OX382150.1G837.1	cellular organisms	1	100
Olob	Osclob_v00_mik.OX382150.1G84.1	cellular organisms	1	100
Olob	Osclob_v00_mik.OX382150.1G909.1	cellular organisms	1	83
Olob	Osclob_v00_mik.OX382150.1G910.1	cellular organisms	1	100
Olob	Osclob_v00_mik.OX382150.1G954.2	cellular organisms	1	83
Olob	Osclob_v00_mik.OX382150.1G993.1	cellular organisms	1	100
Olob	Osclob_v00_mik.OX382150.1G996.1	cellular organisms	1	100
Olob	Osclob_v00_mik.OX382151.1G1075.1	cellular organisms	1	83
Olob	Osclob_v00_mik.OX382151.1G112.1	cellular organisms	1	100
Olob	Osclob_v00_mik.OX382151.1G123.1	cellular organisms	1	100
Olob	Osclob_v00_mik.OX382151.1G205.1	cellular organisms	1	100
Olob	Osclob_v00_mik.OX382151.1G35.1	cellular organisms	1	100
Olob	Osclob_v00_mik.OX382151.1G354.1	cellular organisms	1	100
Olob	Osclob_v00_mik.OX382151.1G405.1	cellular organisms	1	66
Olob	Osclob_v00_mik.OX382151.1G409.1	cellular organisms	1	33
Olob	Osclob_v00_mik.OX382151.1G423.1	cellular organisms	1	33
Olob	Osclob_v00_mik.OX382151.1G663.1	cellular organisms	1	100
Olob	Osclob_v00_mik.OX382151.1G725.1	cellular organisms	1	100
Olob	Osclob_v00_mik.OX382151.1G99.1	cellular organisms	1	100
Olob	Osclob_v00_mik.OX382152.1G260.1	cellular organisms	1	100
Olob	Osclob_v00_mik.OX382152.1G306.1	cellular organisms	1	100
Olob	Osclob_v00_mik.OX382152.1G307.1	cellular organisms	1	100
Olob	Osclob_v00_mik.OX382152.1G852.1	cellular organisms	1	100
Olob	Osclob_v00_mik.OX382152.1G917.1	cellular organisms	1	100
Olob	Osclob_v00_mik.OX382152.1G98.1	cellular organisms	1	100
Olob	Osclob_v00_mik.OX382153.1G301.1	cellular organisms	1	100
Olob	Osclob_v00_mik.OX382153.1G322.1	cellular organisms	1	100
Olob	Osclob_v00_mik.OX382153.1G511.1	cellular organisms	1	100
Olob	Osclob_v00_mik.OX382153.1G689.1	cellular organisms	1	100
Olob	Osclob_v00_mik.OX382153.1G727.1	cellular organisms	1	100
Olob	Osclob_v00_mik.OX382153.1G792.1	cellular organisms	1	100
Olob	Osclob_v00_mik.OX382153.1G831.1	cellular organisms	1	100
Olob	Osclob_v00_mik.OX382153.1G887.1	cellular organisms	1	100
Olob	Osclob_v00_mik.OX382153.1G919.1	cellular organisms	1	100
Olob	Osclob_v00_mik.OX382154.1G100.1	cellular organisms	1	83
Olob	Osclob_v00_mik.OX382154.1G227.1	cellular organisms	1	100
Olob	Osclob_v00_mik.OX382154.1G230.1	cellular organisms	1	83
Olob	Osclob_v00_mik.OX382154.1G231.1	cellular organisms	1	100
Olob	Osclob_v00_mik.OX382154.1G280.1	cellular organisms	1	100
Olob	Osclob_v00_mik.OX382154.1G331.1	cellular organisms	1	100
Olob	Osclob_v00_mik.OX382154.1G348.1	cellular organisms	1	100
Olob	Osclob_v00_mik.OX382154.1G349.1	cellular organisms	1	100
Olob	Osclob_v00_mik.OX382154.1G444.1	cellular organisms	1	100
Olob	Osclob_v00_mik.OX382154.1G531.1	cellular organisms	1	100
Olob	Osclob_v00_mik.OX382154.1G532.1	cellular organisms	1	100
Olob	Osclob_v00_mik.OX382154.1G535.1	cellular organisms	1	100
Olob	Osclob_v00_mik.OX382154.1G542.1	cellular organisms	1	100
Olob	Osclob_v00_mik.OX382154.1G555.1	cellular organisms	1	100
Olob	Osclob_v00_mik.OX382154.1G594.1	cellular organisms	1	100
Olob	Osclob_v00_mik.OX382154.1G641.1	cellular organisms	1	33
Olob	Osclob_v00_mik.OX382154.1G647.1	cellular organisms	1	100
Olob	Osclob_v00_mik.OX382154.1G650.1	cellular organisms	1	100
Olob	Osclob_v00_mik.OX382154.1G652.1	cellular organisms	1	100
Olob	Osclob_v00_mik.OX382154.1G660.1	cellular organisms	1	100
Olob	Osclob_v00_mik.OX382154.1G687.1	cellular organisms	1	66
Olob	Osclob_v00_mik.OX382154.1G723.1	cellular organisms	1	83
Olob	Osclob_v00_mik.OX382154.1G73.1	cellular organisms	1	100
Olob	Osclob_v00_mik.OX382154.1G744.1	cellular organisms	1	100
Olob	Osclob_v00_mik.OX382154.1G751.1	cellular organisms	1	100
Olob	Osclob_v00_mik.OX382154.1G760.1	cellular organisms	1	100
Olob	Osclob_v00_mik.OX382154.1G79.1	cellular organisms	1	100
Olob	Osclob_v00_mik.OX382154.1G791.1	cellular organisms	1	100
Olob	Osclob_v00_mik.OX382154.1G796.1	cellular organisms	1	100
Olob	Osclob_v00_mik.OX382154.1G802.1	cellular organisms	1	83
Olob	Osclob_v00_mik.OX382154.1G847.1	cellular organisms	1	83
Olob	Osclob_v00_mik.OX382154.1G851.1	cellular organisms	1	100
Olob	Osclob_v00_mik.OX382154.1G852.1	cellular organisms	1	100
Olob	Osclob_v00_mik.OX382155.1G160.2	cellular organisms	1	100
Olob	Osclob_v00_mik.OX382155.1G337.1	cellular organisms	1	83
Olob	Osclob_v00_mik.OX382155.1G514.1	cellular organisms	1	100
Olob	Osclob_v00_mik.OX382156.1G165.1	cellular organisms	1	100
Olob	Osclob_v00_mik.OX382156.1G167.1	cellular organisms	1	100
Olob	Osclob_v00_mik.OX382156.1G243.1	cellular organisms	1	100
Olob	Osclob_v00_mik.OX382156.1G25.1	cellular organisms	1	100
Olob	Osclob_v00_mik.OX382156.1G255.1	cellular organisms	1	100
Olob	Osclob_v00_mik.OX382156.1G268.1	cellular organisms	1	100
Olob	Osclob_v00_mik.OX382156.1G351.1	cellular organisms	1	100
Olob	Osclob_v00_mik.OX382156.1G378.1	cellular organisms	1	100
Olob	Osclob_v00_mik.OX382156.1G434.1	cellular organisms	1	100
Olob	Osclob_v00_mik.OX382156.1G563.1	cellular organisms	1	100
Olob	Osclob_v00_mik.OX382156.1G575.1	cellular organisms	1	100
Olob	Osclob_v00_mik.OX382156.1G613.1	cellular organisms	1	100
Olob	Osclob_v00_mik.OX382156.1G637.1	cellular organisms	1	100
Olob	Osclob_v00_mik.OX382156.1G724.1	cellular organisms	1	100
Olob	Osclob_v00_mik.OX382157.1G253.1	cellular organisms	1	100
Olob	Osclob_v00_mik.OX382157.1G260.1	cellular organisms	1	100
Olob	Osclob_v00_mik.OX382157.1G346.1	cellular organisms	1	66
Olob	Osclob_v00_mik.OX382157.1G678.1	cellular organisms	1	100
Olob	Osclob_v00_mik.OX382157.1G80.1	cellular organisms	1	100
Olob	Osclob_v00_mik.OX382157.1G90.2	cellular organisms	1	100
Olob	Osclob_v00_mik.OX382158.1G182.1	cellular organisms	1	100
Olob	Osclob_v00_mik.OX382158.1G236.1	cellular organisms	1	100
Olob	Osclob_v00_mik.OX382158.1G258.1	cellular organisms	1	100
Olob	Osclob_v00_mik.OX382158.1G26.1	cellular organisms	1	100
Olob	Osclob_v00_mik.OX382158.1G320.1	cellular organisms	1	100
Olob	Osclob_v00_mik.OX382158.1G321.1	cellular organisms	1	100
Olob	Osclob_v00_mik.OX382158.1G402.1	cellular organisms	1	100
Olob	Osclob_v00_mik.OX382158.1G529.1	cellular organisms	1	100
Olob	Osclob_v00_mik.OX382158.1G557.1	cellular organisms	1	100
Olob	Osclob_v00_mik.OX382158.1G66.1	cellular organisms	1	83
Olob	Osclob_v00_mik.OX382158.1G681.1	cellular organisms	1	83
Olob	Osclob_v00_mik.OX382158.1G695.1	cellular organisms	1	100
Olob	Osclob_v00_mik.OX382158.1G760.1	cellular organisms	1	100
Olob	Osclob_v00_mik.OX382159.1G100.1	cellular organisms	1	100
Olob	Osclob_v00_mik.OX382159.1G141.1	cellular organisms	1	100
Olob	Osclob_v00_mik.OX382159.1G143.1	cellular organisms	1	100
Olob	Osclob_v00_mik.OX382159.1G160.1	cellular organisms	1	100
Olob	Osclob_v00_mik.OX382159.1G30.1	cellular organisms	1	83
Olob	Osclob_v00_mik.OX382159.1G306.1	cellular organisms	1	100
Olob	Osclob_v00_mik.OX382159.1G323.1	cellular organisms	1	100
Olob	Osclob_v00_mik.OX382159.1G328.1	cellular organisms	1	100
Olob	Osclob_v00_mik.OX382159.1G440.1	cellular organisms	1	100
Olob	Osclob_v00_mik.OX382159.1G495.1	cellular organisms	1	100
Olob	Osclob_v00_mik.OX382159.1G586.1	cellular organisms	1	66
Olob	Osclob_v00_mik.OX382159.1G721.1	cellular organisms	1	100
Olob	Osclob_v00_mik.OX382159.1G770.1	cellular organisms	1	100
Olob	Osclob_v00_mik.OX382160.1G191.1	cellular organisms	1	100
Olob	Osclob_v00_mik.OX382160.1G228.1	cellular organisms	1	100
Olob	Osclob_v00_mik.OX382160.1G346.1	cellular organisms	1	100
Olob	Osclob_v00_mik.OX382160.1G364.1	cellular organisms	1	100
Olob	Osclob_v00_mik.OX382160.1G368.1	cellular organisms	1	100
Olob	Osclob_v00_mik.OX382160.1G53.1	cellular organisms	1	100
Olob	Osclob_v00_mik.OX382160.1G572.1	cellular organisms	1	100
Olob	Osclob_v00_mik.OX382160.1G574.1	cellular organisms	1	100
Olob	Osclob_v00_mik.OX382160.1G621.1	cellular organisms	1	100
Olob	Osclob_v00_mik.OX382161.1G223.1	cellular organisms	1	100
Olob	Osclob_v00_mik.OX382161.1G226.1	cellular organisms	1	100
Olob	Osclob_v00_mik.OX382161.1G298.1	cellular organisms	1	100
Olob	Osclob_v00_mik.OX382161.1G328.1	cellular organisms	1	100
Olob	Osclob_v00_mik.OX382161.1G363.1	cellular organisms	1	100
Olob	Osclob_v00_mik.OX382161.1G464.1	cellular organisms	1	100
Olob	Osclob_v00_mik.OX382161.1G541.1	cellular organisms	1	100
Olob	Osclob_v00_mik.OX382161.1G598.2	cellular organisms	1	100
Olob	Osclob_v00_mik.OX382161.1G601.1	cellular organisms	1	100
Olob	Osclob_v00_mik.OX382161.1G665.1	cellular organisms	1	100
Olob	Osclob_v00_mik.OX382161.1G666.1	cellular organisms	1	100
Olob	Osclob_v00_mik.OX382161.1G669.1	cellular organisms	1	100
Olob	Osclob_v00_mik.OX382161.1G72.1	cellular organisms	1	100
Olob	Osclob_v00_mik.OX382161.1G97.1	cellular organisms	1	100
Olob	Osclob_v00_mik.OX382162.1G117.1	cellular organisms	1	100
Olob	Osclob_v00_mik.OX382162.1G208.1	cellular organisms	1	100
Olob	Osclob_v00_mik.OX382162.1G209.1	cellular organisms	1	100
Olob	Osclob_v00_mik.OX382162.1G259.1	cellular organisms	1	100
Olob	Osclob_v00_mik.OX382162.1G263.1	cellular organisms	1	100
Olob	Osclob_v00_mik.OX382162.1G356.1	cellular organisms	1	100
Olob	Osclob_v00_mik.OX382162.1G509.1	cellular organisms	1	100
Olob	Osclob_v00_mik.OX382162.1G568.1	cellular organisms	1	100
Olob	Osclob_v00_mik.OX382162.1G569.1	cellular organisms	1	100
Olob	Osclob_v00_mik.OX382162.1G596.1	cellular organisms	1	83
Olob	Osclob_v00_mik.OX382163.1G113.1	cellular organisms	1	50
Olob	Osclob_v00_mik.OX382163.1G24.2	cellular organisms	1	100
Olob	Osclob_v00_mik.OX382163.1G245.1	cellular organisms	1	100
Olob	Osclob_v00_mik.OX382163.1G279.1	cellular organisms	1	100
Olob	Osclob_v00_mik.OX382163.1G325.1	cellular organisms	1	100
Olob	Osclob_v00_mik.OX382163.1G340.1	cellular organisms	1	100
Olob	Osclob_v00_mik.OX382164.1G194.1	cellular organisms	1	100
Olob	Osclob_v00_mik.OX382164.1G258.1	cellular organisms	1	100
Olob	Osclob_v00_mik.OX382164.1G273.1	cellular organisms	1	100
Olob	Osclob_v00_mik.OX382164.1G285.1	cellular organisms	1	100
Olob	Osclob_v00_mik.OX382164.1G295.1	cellular organisms	1	100
Olob	Osclob_v00_mik.OX382164.1G460.1	cellular organisms	1	100
Olob	Osclob_v00_mik.OX382164.1G466.1	cellular organisms	1	100
Olob	Osclob_v00_mik.OX382164.1G584.1	cellular organisms	1	100
Olob	Osclob_v00_mik.OX382164.1G587.2	cellular organisms	1	100
Olob	Osclob_v00_mik.OX382165.1G123.1	cellular organisms	1	100
Olob	Osclob_v00_mik.OX382165.1G351.1	cellular organisms	1	100
Olob	Osclob_v00_mik.OX382165.1G445.1	cellular organisms	1	100
Olob	Osclob_v00_mik.OX382165.1G452.1	cellular organisms	1	100
Olob	Osclob_v00_mik.OX382165.1G453.1	cellular organisms	1	100
Olob	Osclob_v00_mik.OX382165.1G454.1	cellular organisms	1	100
Olob	Osclob_v00_mik.OX382165.1G456.1	cellular organisms	1	100
Olob	Osclob_v00_mik.OX382166.1G119.1	cellular organisms	1	100
Olob	Osclob_v00_mik.OX382166.1G364.1	cellular organisms	1	100
Olob	Osclob_v00_mik.OX382166.1G372.1	cellular organisms	1	50
Olob	Osclob_v00_mik.OX382167.1G177.1	cellular organisms	1	100
Olob	Osclob_v00_mik.OX382167.1G29.1	cellular organisms	1	100
Olob	Osclob_v00_mik.OX382167.1G327.1	cellular organisms	1	100
Olob	Osclob_v00_mik.OX382167.1G404.1	cellular organisms	1	100
Olob	Osclob_v00_mik.OX382167.1G41.3	cellular organisms	1	100
Olob	Osclob_v00_mik.OX382167.1G416.1	cellular organisms	1	100
Olob	Osclob_v00_mik.OX382167.1G442.1	cellular organisms	1	100
Olob	Osclob_v00_mik.OX382167.1G454.1	cellular organisms	1	100
Olob	Osclob_v00_mik.OX382168.1G131.1	cellular organisms	1	100
Olob	Osclob_v00_mik.OX382168.1G132.1	cellular organisms	1	100
Olob	Osclob_v00_mik.OX382168.1G136.1	cellular organisms	1	66
Olob	Osclob_v00_mik.OX382168.1G163.1	cellular organisms	1	100
Olob	Osclob_v00_mik.OX382168.1G184.1	cellular organisms	1	100
Olob	Osclob_v00_mik.OX382168.1G22.1	cellular organisms	1	100
Olob	Osclob_v00_mik.OX382168.1G23.2	cellular organisms	1	100
Olob	Osclob_v00_mik.OX382168.1G29.1	cellular organisms	1	100
Olob	Osclob_v00_mik.OX382168.1G313.1	cellular organisms	1	100
Olob	Osclob_v00_mik.OX382168.1G33.1	cellular organisms	1	100
Olob	Osclob_v00_mik.OX382168.1G367.2	cellular organisms	1	100
Olob	Osclob_v00_mik.OX382168.1G384.1	cellular organisms	1	100
Olob	Osclob_v00_mik.OX382168.1G397.1	cellular organisms	1	100
Olob	Osclob_v00_mik.OX382168.1G398.1	cellular organisms	1	100
Olob	Osclob_v00_mik.OX382168.1G45.1	cellular organisms	1	100
Olob	Osclob_v00_mik.OX382168.1G80.1	cellular organisms	1	83
Olob	Osclob_v00_mik.OX382168.1G84.1	cellular organisms	1	100
Olob	Osclob_v00_mik.OX382169.1G25.1	cellular organisms	1	100
Olob	Osclob_v00_mik.OX382169.1G333.1	cellular organisms	1	100
Olob	Osclob_v00_mik.OX382169.1G367.1	cellular organisms	1	83
Olob	Osclob_v00_mik.OX382169.1G391.1	cellular organisms	1	100
Olob	Osclob_v00_mik.OX382169.1G395.1	cellular organisms	1	100
Olob	Osclob_v00_mik.OX382169.1G433.1	cellular organisms	1	100
Olob	Osclob_v00_mik.OX382169.1G51.1	cellular organisms	1	100
Pfic	Petfic_v00_mik.OX345636.1G1002.1	cellular organisms	1	100
Pfic	Petfic_v00_mik.OX345636.1G1012.1	cellular organisms	1	100
Pfic	Petfic_v00_mik.OX345636.1G1034.1	cellular organisms	1	62
Pfic	Petfic_v00_mik.OX345636.1G1050.1	cellular organisms	1	100
Pfic	Petfic_v00_mik.OX345636.1G1060.1	cellular organisms	1	75
Pfic	Petfic_v00_mik.OX345636.1G1078.1	cellular organisms	1	75
Pfic	Petfic_v00_mik.OX345636.1G1080.1	cellular organisms	1	100
Pfic	Petfic_v00_mik.OX345636.1G1082.1	cellular organisms	1	87
Pfic	Petfic_v00_mik.OX345636.1G1084.1	cellular organisms	1	87
Pfic	Petfic_v00_mik.OX345636.1G1089.1	cellular organisms	1	100
Pfic	Petfic_v00_mik.OX345636.1G1095.1	cellular organisms	1	50
Pfic	Petfic_v00_mik.OX345636.1G1110.1	cellular organisms	1	100
Pfic	Petfic_v00_mik.OX345636.1G1123.1	cellular organisms	1	100
Pfic	Petfic_v00_mik.OX345636.1G1139.1	cellular organisms	1	100
Pfic	Petfic_v00_mik.OX345636.1G1150.1	cellular organisms	1	100
Pfic	Petfic_v00_mik.OX345636.1G1163.1	cellular organisms	1	37
Pfic	Petfic_v00_mik.OX345636.1G1166.1	cellular organisms	1	100
Pfic	Petfic_v00_mik.OX345636.1G1192.1	cellular organisms	1	62
Pfic	Petfic_v00_mik.OX345636.1G1203.1	cellular organisms	1	100
Pfic	Petfic_v00_mik.OX345636.1G1211.1	cellular organisms	1	100
Pfic	Petfic_v00_mik.OX345636.1G1212.1	cellular organisms	1	100
Pfic	Petfic_v00_mik.OX345636.1G1213.1	cellular organisms	1	100
Pfic	Petfic_v00_mik.OX345636.1G1234.1	cellular organisms	1	100
Pfic	Petfic_v00_mik.OX345636.1G1266.1	cellular organisms	1	87
Pfic	Petfic_v00_mik.OX345636.1G128.1	cellular organisms	1	75
Pfic	Petfic_v00_mik.OX345636.1G1280.1	cellular organisms	1	100
Pfic	Petfic_v00_mik.OX345636.1G1343.1	cellular organisms	1	100
Pfic	Petfic_v00_mik.OX345636.1G1377.1	cellular organisms	1	75
Pfic	Petfic_v00_mik.OX345636.1G1380.1	cellular organisms	1	100
Pfic	Petfic_v00_mik.OX345636.1G1381.1	cellular organisms	1	87
Pfic	Petfic_v00_mik.OX345636.1G1382.1	cellular organisms	1	87
Pfic	Petfic_v00_mik.OX345636.1G1425.1	cellular organisms	1	50
Pfic	Petfic_v00_mik.OX345636.1G1450.1	cellular organisms	1	100
Pfic	Petfic_v00_mik.OX345636.1G1484.1	cellular organisms	1	100
Pfic	Petfic_v00_mik.OX345636.1G149.1	cellular organisms	1	75
Pfic	Petfic_v00_mik.OX345636.1G1514.1	cellular organisms	1	100
Pfic	Petfic_v00_mik.OX345636.1G1518.1	cellular organisms	1	100
Pfic	Petfic_v00_mik.OX345636.1G1531.1	cellular organisms	1	100
Pfic	Petfic_v00_mik.OX345636.1G1543.1	cellular organisms	1	100
Pfic	Petfic_v00_mik.OX345636.1G1551.1	cellular organisms	1	100
Pfic	Petfic_v00_mik.OX345636.1G1558.1	cellular organisms	1	87
Pfic	Petfic_v00_mik.OX345636.1G1617.1	cellular organisms	1	75
Pfic	Petfic_v00_mik.OX345636.1G1656.1	cellular organisms	1	87
Pfic	Petfic_v00_mik.OX345636.1G166.1	cellular organisms	1	100
Pfic	Petfic_v00_mik.OX345636.1G1701.1	cellular organisms	1	100
Pfic	Petfic_v00_mik.OX345636.1G1709.1	cellular organisms	1	100
Pfic	Petfic_v00_mik.OX345636.1G1724.1	cellular organisms	1	75
Pfic	Petfic_v00_mik.OX345636.1G1747.1	cellular organisms	1	50
Pfic	Petfic_v00_mik.OX345636.1G1756.1	cellular organisms	1	75
Pfic	Petfic_v00_mik.OX345636.1G1785.1	cellular organisms	1	75
Pfic	Petfic_v00_mik.OX345636.1G179.1	cellular organisms	1	100
Pfic	Petfic_v00_mik.OX345636.1G1791.1	cellular organisms	1	100
Pfic	Petfic_v00_mik.OX345636.1G1821.1	cellular organisms	1	100
Pfic	Petfic_v00_mik.OX345636.1G1828.1	cellular organisms	1	100
Pfic	Petfic_v00_mik.OX345636.1G1861.1	cellular organisms	1	62
Pfic	Petfic_v00_mik.OX345636.1G1868.1	cellular organisms	1	100
Pfic	Petfic_v00_mik.OX345636.1G1907.1	cellular organisms	1	87
Pfic	Petfic_v00_mik.OX345636.1G1937.1	cellular organisms	1	100
Pfic	Petfic_v00_mik.OX345636.1G1943.2	cellular organisms	1	87
Pfic	Petfic_v00_mik.OX345636.1G1949.1	cellular organisms	1	100
Pfic	Petfic_v00_mik.OX345636.1G1967.1	cellular organisms	1	100
Pfic	Petfic_v00_mik.OX345636.1G1975.1	cellular organisms	1	100
Pfic	Petfic_v00_mik.OX345636.1G1976.1	cellular organisms	1	100
Pfic	Petfic_v00_mik.OX345636.1G1979.1	cellular organisms	1	75
Pfic	Petfic_v00_mik.OX345636.1G1989.1	cellular organisms	1	100
Pfic	Petfic_v00_mik.OX345636.1G1992.1	cellular organisms	1	100
Pfic	Petfic_v00_mik.OX345636.1G2017.1	cellular organisms	1	100
Pfic	Petfic_v00_mik.OX345636.1G2020.1	cellular organisms	1	75
Pfic	Petfic_v00_mik.OX345636.1G2037.1	cellular organisms	1	50
Pfic	Petfic_v00_mik.OX345636.1G2050.1	cellular organisms	1	100
Pfic	Petfic_v00_mik.OX345636.1G2060.1	cellular organisms	1	75
Pfic	Petfic_v00_mik.OX345636.1G2083.1	cellular organisms	1	100
Pfic	Petfic_v00_mik.OX345636.1G2111.1	cellular organisms	1	100
Pfic	Petfic_v00_mik.OX345636.1G2137.1	cellular organisms	1	100
Pfic	Petfic_v00_mik.OX345636.1G2160.1	cellular organisms	1	100
Pfic	Petfic_v00_mik.OX345636.1G2216.1	cellular organisms	1	100
Pfic	Petfic_v00_mik.OX345636.1G2241.1	cellular organisms	1	100
Pfic	Petfic_v00_mik.OX345636.1G2245.1	cellular organisms	1	100
Pfic	Petfic_v00_mik.OX345636.1G2249.1	cellular organisms	1	62
Pfic	Petfic_v00_mik.OX345636.1G2251.1	cellular organisms	1	100
Pfic	Petfic_v00_mik.OX345636.1G2265.1	cellular organisms	1	100
Pfic	Petfic_v00_mik.OX345636.1G2279.1	cellular organisms	1	62
Pfic	Petfic_v00_mik.OX345636.1G2291.1	cellular organisms	1	75
Pfic	Petfic_v00_mik.OX345636.1G2302.1	cellular organisms	1	75
Pfic	Petfic_v00_mik.OX345636.1G2312.1	cellular organisms	1	100
Pfic	Petfic_v00_mik.OX345636.1G2315.1	cellular organisms	1	100
Pfic	Petfic_v00_mik.OX345636.1G2319.1	cellular organisms	1	100
Pfic	Petfic_v00_mik.OX345636.1G2335.1	cellular organisms	1	100
Pfic	Petfic_v00_mik.OX345636.1G2338.1	cellular organisms	1	100
Pfic	Petfic_v00_mik.OX345636.1G2347.1	cellular organisms	1	75
Pfic	Petfic_v00_mik.OX345636.1G2369.1	cellular organisms	1	50
Pfic	Petfic_v00_mik.OX345636.1G2380.1	cellular organisms	1	100
Pfic	Petfic_v00_mik.OX345636.1G2381.1	cellular organisms	1	100
Pfic	Petfic_v00_mik.OX345636.1G2422.1	cellular organisms	1	100
Pfic	Petfic_v00_mik.OX345636.1G2441.1	cellular organisms	1	100
Pfic	Petfic_v00_mik.OX345636.1G2448.1	cellular organisms	1	87
Pfic	Petfic_v00_mik.OX345636.1G2460.1	cellular organisms	1	100
Pfic	Petfic_v00_mik.OX345636.1G2474.1	cellular organisms	1	100
Pfic	Petfic_v00_mik.OX345636.1G2477.2	cellular organisms	1	100
Pfic	Petfic_v00_mik.OX345636.1G2552.1	cellular organisms	1	100
Pfic	Petfic_v00_mik.OX345636.1G2603.1	cellular organisms	1	87
Pfic	Petfic_v00_mik.OX345636.1G2641.1	cellular organisms	1	62
Pfic	Petfic_v00_mik.OX345636.1G2673.1	cellular organisms	1	100
Pfic	Petfic_v00_mik.OX345636.1G2691.1	cellular organisms	1	100
Pfic	Petfic_v00_mik.OX345636.1G2711.1	cellular organisms	1	100
Pfic	Petfic_v00_mik.OX345636.1G2776.1	cellular organisms	1	100
Pfic	Petfic_v00_mik.OX345636.1G2786.1	cellular organisms	1	100
Pfic	Petfic_v00_mik.OX345636.1G2792.1	cellular organisms	1	75
Pfic	Petfic_v00_mik.OX345636.1G2798.1	cellular organisms	1	75
Pfic	Petfic_v00_mik.OX345636.1G2842.1	cellular organisms	1	100
Pfic	Petfic_v00_mik.OX345636.1G2857.1	cellular organisms	1	100
Pfic	Petfic_v00_mik.OX345636.1G2907.1	cellular organisms	1	100
Pfic	Petfic_v00_mik.OX345636.1G2913.1	cellular organisms	1	75
Pfic	Petfic_v00_mik.OX345636.1G2916.1	cellular organisms	1	87
Pfic	Petfic_v00_mik.OX345636.1G2960.1	cellular organisms	1	100
Pfic	Petfic_v00_mik.OX345636.1G2969.1	cellular organisms	1	87
Pfic	Petfic_v00_mik.OX345636.1G3151.1	cellular organisms	1	100
Pfic	Petfic_v00_mik.OX345636.1G3152.1	cellular organisms	1	87
Pfic	Petfic_v00_mik.OX345636.1G3162.1	cellular organisms	1	100
Pfic	Petfic_v00_mik.OX345636.1G3252.1	cellular organisms	1	100
Pfic	Petfic_v00_mik.OX345636.1G3255.1	cellular organisms	1	87
Pfic	Petfic_v00_mik.OX345636.1G3293.1	cellular organisms	1	100
Pfic	Petfic_v00_mik.OX345636.1G3302.1	cellular organisms	1	100
Pfic	Petfic_v00_mik.OX345636.1G3309.1	cellular organisms	1	100
Pfic	Petfic_v00_mik.OX345636.1G3326.1	cellular organisms	1	100
Pfic	Petfic_v00_mik.OX345636.1G3332.1	cellular organisms	1	100
Pfic	Petfic_v00_mik.OX345636.1G3367.1	cellular organisms	1	100
Pfic	Petfic_v00_mik.OX345636.1G3384.1	cellular organisms	1	87
Pfic	Petfic_v00_mik.OX345636.1G3421.1	cellular organisms	1	37
Pfic	Petfic_v00_mik.OX345636.1G3456.1	cellular organisms	1	87
Pfic	Petfic_v00_mik.OX345636.1G3463.1	cellular organisms	1	75
Pfic	Petfic_v00_mik.OX345636.1G3486.1	cellular organisms	1	87
Pfic	Petfic_v00_mik.OX345636.1G3490.1	cellular organisms	1	100
Pfic	Petfic_v00_mik.OX345636.1G3500.1	cellular organisms	1	100
Pfic	Petfic_v00_mik.OX345636.1G3504.1	cellular organisms	1	87
Pfic	Petfic_v00_mik.OX345636.1G3511.1	cellular organisms	1	87
Pfic	Petfic_v00_mik.OX345636.1G3527.1	cellular organisms	1	87
Pfic	Petfic_v00_mik.OX345636.1G3541.1	cellular organisms	1	100
Pfic	Petfic_v00_mik.OX345636.1G3549.1	cellular organisms	1	100
Pfic	Petfic_v00_mik.OX345636.1G358.1	cellular organisms	1	87
Pfic	Petfic_v00_mik.OX345636.1G3619.1	cellular organisms	1	100
Pfic	Petfic_v00_mik.OX345636.1G3637.1	cellular organisms	1	100
Pfic	Petfic_v00_mik.OX345636.1G3688.1	cellular organisms	1	100
Pfic	Petfic_v00_mik.OX345636.1G3693.1	cellular organisms	1	100
Pfic	Petfic_v00_mik.OX345636.1G3712.1	cellular organisms	1	100
Pfic	Petfic_v00_mik.OX345636.1G3728.1	cellular organisms	1	87
Pfic	Petfic_v00_mik.OX345636.1G3825.1	cellular organisms	1	100
Pfic	Petfic_v00_mik.OX345636.1G3827.1	cellular organisms	1	100
Pfic	Petfic_v00_mik.OX345636.1G3843.1	cellular organisms	1	100
Pfic	Petfic_v00_mik.OX345636.1G3853.1	cellular organisms	1	100
Pfic	Petfic_v00_mik.OX345636.1G3872.1	cellular organisms	1	100
Pfic	Petfic_v00_mik.OX345636.1G3877.1	cellular organisms	1	87
Pfic	Petfic_v00_mik.OX345636.1G39.1	cellular organisms	1	100
Pfic	Petfic_v00_mik.OX345636.1G3998.1	cellular organisms	1	100
Pfic	Petfic_v00_mik.OX345636.1G402.1	cellular organisms	1	87
Pfic	Petfic_v00_mik.OX345636.1G4050.1	cellular organisms	1	100
Pfic	Petfic_v00_mik.OX345636.1G4053.1	cellular organisms	1	100
Pfic	Petfic_v00_mik.OX345636.1G4076.1	cellular organisms	1	100
Pfic	Petfic_v00_mik.OX345636.1G411.1	cellular organisms	1	100
Pfic	Petfic_v00_mik.OX345636.1G4124.1	cellular organisms	1	100
Pfic	Petfic_v00_mik.OX345636.1G4137.1	cellular organisms	1	100
Pfic	Petfic_v00_mik.OX345636.1G414.1	cellular organisms	1	100
Pfic	Petfic_v00_mik.OX345636.1G4141.1	cellular organisms	1	100
Pfic	Petfic_v00_mik.OX345636.1G4226.1	cellular organisms	1	75
Pfic	Petfic_v00_mik.OX345636.1G4240.1	cellular organisms	1	100
Pfic	Petfic_v00_mik.OX345636.1G4250.1	cellular organisms	1	100
Pfic	Petfic_v00_mik.OX345636.1G4253.1	cellular organisms	1	37
Pfic	Petfic_v00_mik.OX345636.1G4398.1	cellular organisms	1	100
Pfic	Petfic_v00_mik.OX345636.1G4404.1	cellular organisms	1	100
Pfic	Petfic_v00_mik.OX345636.1G4407.1	cellular organisms	1	100
Pfic	Petfic_v00_mik.OX345636.1G4416.1	cellular organisms	1	100
Pfic	Petfic_v00_mik.OX345636.1G4428.1	cellular organisms	1	100
Pfic	Petfic_v00_mik.OX345636.1G4429.1	cellular organisms	1	100
Pfic	Petfic_v00_mik.OX345636.1G4443.1	cellular organisms	1	100
Pfic	Petfic_v00_mik.OX345636.1G4457.1	cellular organisms	1	100
Pfic	Petfic_v00_mik.OX345636.1G4489.1	cellular organisms	1	100
Pfic	Petfic_v00_mik.OX345636.1G4509.1	cellular organisms	1	62
Pfic	Petfic_v00_mik.OX345636.1G4518.1	cellular organisms	1	100
Pfic	Petfic_v00_mik.OX345636.1G4535.1	cellular organisms	1	100
Pfic	Petfic_v00_mik.OX345636.1G4554.1	cellular organisms	1	100
Pfic	Petfic_v00_mik.OX345636.1G4604.1	cellular organisms	1	87
Pfic	Petfic_v00_mik.OX345636.1G4659.1	cellular organisms	1	100
Pfic	Petfic_v00_mik.OX345636.1G4674.1	cellular organisms	1	100
Pfic	Petfic_v00_mik.OX345636.1G4755.1	cellular organisms	1	100
Pfic	Petfic_v00_mik.OX345636.1G4768.1	cellular organisms	1	100
Pfic	Petfic_v00_mik.OX345636.1G4829.1	cellular organisms	1	87
Pfic	Petfic_v00_mik.OX345636.1G4839.1	cellular organisms	1	87
Pfic	Petfic_v00_mik.OX345636.1G4843.1	cellular organisms	1	87
Pfic	Petfic_v00_mik.OX345636.1G4859.1	cellular organisms	1	100
Pfic	Petfic_v00_mik.OX345636.1G487.1	cellular organisms	1	75
Pfic	Petfic_v00_mik.OX345636.1G488.1	cellular organisms	1	100
Pfic	Petfic_v00_mik.OX345636.1G4889.1	cellular organisms	1	87
Pfic	Petfic_v00_mik.OX345636.1G491.1	cellular organisms	1	100
Pfic	Petfic_v00_mik.OX345636.1G4912.1	cellular organisms	1	100
Pfic	Petfic_v00_mik.OX345636.1G4928.1	cellular organisms	1	87
Pfic	Petfic_v00_mik.OX345636.1G4933.1	cellular organisms	1	50
Pfic	Petfic_v00_mik.OX345636.1G4957.1	cellular organisms	1	100
Pfic	Petfic_v00_mik.OX345636.1G4971.1	cellular organisms	1	100
Pfic	Petfic_v00_mik.OX345636.1G4985.1	cellular organisms	1	100
Pfic	Petfic_v00_mik.OX345636.1G5000.1	cellular organisms	1	100
Pfic	Petfic_v00_mik.OX345636.1G5008.1	cellular organisms	1	87
Pfic	Petfic_v00_mik.OX345636.1G5022.1	cellular organisms	1	62
Pfic	Petfic_v00_mik.OX345636.1G507.1	cellular organisms	1	87
Pfic	Petfic_v00_mik.OX345636.1G5076.1	cellular organisms	1	100
Pfic	Petfic_v00_mik.OX345636.1G5115.1	cellular organisms	1	100
Pfic	Petfic_v00_mik.OX345636.1G5159.1	cellular organisms	1	62
Pfic	Petfic_v00_mik.OX345636.1G516.1	cellular organisms	1	100
Pfic	Petfic_v00_mik.OX345636.1G5180.1	cellular organisms	1	100
Pfic	Petfic_v00_mik.OX345636.1G5250.1	cellular organisms	1	100
Pfic	Petfic_v00_mik.OX345636.1G5267.1	cellular organisms	1	50
Pfic	Petfic_v00_mik.OX345636.1G5273.1	cellular organisms	1	75
Pfic	Petfic_v00_mik.OX345636.1G5280.1	cellular organisms	1	62
Pfic	Petfic_v00_mik.OX345636.1G5289.1	cellular organisms	1	100
Pfic	Petfic_v00_mik.OX345636.1G5300.1	cellular organisms	1	50
Pfic	Petfic_v00_mik.OX345636.1G5309.1	cellular organisms	1	100
Pfic	Petfic_v00_mik.OX345636.1G5316.1	cellular organisms	1	87
Pfic	Petfic_v00_mik.OX345636.1G5331.1	cellular organisms	1	100
Pfic	Petfic_v00_mik.OX345636.1G5370.1	cellular organisms	1	100
Pfic	Petfic_v00_mik.OX345636.1G5390.1	cellular organisms	1	100
Pfic	Petfic_v00_mik.OX345636.1G5391.1	cellular organisms	1	100
Pfic	Petfic_v00_mik.OX345636.1G5411.1	cellular organisms	1	100
Pfic	Petfic_v00_mik.OX345636.1G5419.1	cellular organisms	1	75
Pfic	Petfic_v00_mik.OX345636.1G5424.1	cellular organisms	1	100
Pfic	Petfic_v00_mik.OX345636.1G543.1	cellular organisms	1	100
Pfic	Petfic_v00_mik.OX345636.1G5448.1	cellular organisms	1	75
Pfic	Petfic_v00_mik.OX345636.1G545.1	cellular organisms	1	100
Pfic	Petfic_v00_mik.OX345636.1G5473.1	cellular organisms	1	100
Pfic	Petfic_v00_mik.OX345636.1G5478.1	cellular organisms	1	100
Pfic	Petfic_v00_mik.OX345636.1G549.1	cellular organisms	1	100
Pfic	Petfic_v00_mik.OX345636.1G550.1	cellular organisms	1	100
Pfic	Petfic_v00_mik.OX345636.1G5511.1	cellular organisms	1	100
Pfic	Petfic_v00_mik.OX345636.1G5574.1	cellular organisms	1	87
Pfic	Petfic_v00_mik.OX345636.1G5586.1	cellular organisms	1	100
Pfic	Petfic_v00_mik.OX345636.1G5636.1	cellular organisms	1	100
Pfic	Petfic_v00_mik.OX345636.1G5652.1	cellular organisms	1	87
Pfic	Petfic_v00_mik.OX345636.1G5694.1	cellular organisms	1	100
Pfic	Petfic_v00_mik.OX345636.1G5720.1	cellular organisms	1	100
Pfic	Petfic_v00_mik.OX345636.1G5728.1	cellular organisms	1	87
Pfic	Petfic_v00_mik.OX345636.1G5806.1	cellular organisms	1	100
Pfic	Petfic_v00_mik.OX345636.1G5817.1	cellular organisms	1	87
Pfic	Petfic_v00_mik.OX345636.1G5930.1	cellular organisms	1	62
Pfic	Petfic_v00_mik.OX345636.1G5952.1	cellular organisms	1	100
Pfic	Petfic_v00_mik.OX345636.1G5957.1	cellular organisms	1	100
Pfic	Petfic_v00_mik.OX345636.1G5997.1	cellular organisms	1	100
Pfic	Petfic_v00_mik.OX345636.1G600.1	cellular organisms	1	100
Pfic	Petfic_v00_mik.OX345636.1G6007.1	cellular organisms	1	87
Pfic	Petfic_v00_mik.OX345636.1G6014.1	cellular organisms	1	100
Pfic	Petfic_v00_mik.OX345636.1G6040.1	cellular organisms	1	100
Pfic	Petfic_v00_mik.OX345636.1G6049.1	cellular organisms	1	100
Pfic	Petfic_v00_mik.OX345636.1G6050.1	cellular organisms	1	100
Pfic	Petfic_v00_mik.OX345636.1G6076.1	cellular organisms	1	100
Pfic	Petfic_v00_mik.OX345636.1G6083.1	cellular organisms	1	75
Pfic	Petfic_v00_mik.OX345636.1G6093.1	cellular organisms	1	75
Pfic	Petfic_v00_mik.OX345636.1G6099.1	cellular organisms	1	87
Pfic	Petfic_v00_mik.OX345636.1G6102.1	cellular organisms	1	100
Pfic	Petfic_v00_mik.OX345636.1G6112.1	cellular organisms	1	62
Pfic	Petfic_v00_mik.OX345636.1G6124.1	cellular organisms	1	87
Pfic	Petfic_v00_mik.OX345636.1G6127.1	cellular organisms	1	100
Pfic	Petfic_v00_mik.OX345636.1G6168.1	cellular organisms	1	100
Pfic	Petfic_v00_mik.OX345636.1G6208.1	cellular organisms	1	75
Pfic	Petfic_v00_mik.OX345636.1G6221.1	cellular organisms	1	75
Pfic	Petfic_v00_mik.OX345636.1G6222.1	cellular organisms	1	87
Pfic	Petfic_v00_mik.OX345636.1G6237.1	cellular organisms	1	100
Pfic	Petfic_v00_mik.OX345636.1G6260.1	cellular organisms	1	100
Pfic	Petfic_v00_mik.OX345636.1G6262.1	cellular organisms	1	100
Pfic	Petfic_v00_mik.OX345636.1G6296.1	cellular organisms	1	100
Pfic	Petfic_v00_mik.OX345636.1G6337.1	cellular organisms	1	100
Pfic	Petfic_v00_mik.OX345636.1G6346.1	cellular organisms	1	100
Pfic	Petfic_v00_mik.OX345636.1G6358.1	cellular organisms	1	100
Pfic	Petfic_v00_mik.OX345636.1G6389.1	cellular organisms	1	100
Pfic	Petfic_v00_mik.OX345636.1G6408.1	cellular organisms	1	100
Pfic	Petfic_v00_mik.OX345636.1G6414.2	cellular organisms	1	100
Pfic	Petfic_v00_mik.OX345636.1G6419.1	cellular organisms	1	100
Pfic	Petfic_v00_mik.OX345636.1G6467.1	cellular organisms	1	100
Pfic	Petfic_v00_mik.OX345636.1G6502.1	cellular organisms	1	62
Pfic	Petfic_v00_mik.OX345636.1G6526.1	cellular organisms	1	100
Pfic	Petfic_v00_mik.OX345636.1G6575.1	cellular organisms	1	100
Pfic	Petfic_v00_mik.OX345636.1G6581.1	cellular organisms	1	100
Pfic	Petfic_v00_mik.OX345636.1G6591.1	cellular organisms	1	100
Pfic	Petfic_v00_mik.OX345636.1G66.1	cellular organisms	1	75
Pfic	Petfic_v00_mik.OX345636.1G6739.1	cellular organisms	1	100
Pfic	Petfic_v00_mik.OX345636.1G674.1	cellular organisms	1	100
Pfic	Petfic_v00_mik.OX345636.1G6741.1	cellular organisms	1	62
Pfic	Petfic_v00_mik.OX345636.1G6747.1	cellular organisms	1	100
Pfic	Petfic_v00_mik.OX345636.1G6788.1	cellular organisms	1	100
Pfic	Petfic_v00_mik.OX345636.1G682.1	cellular organisms	1	100
Pfic	Petfic_v00_mik.OX345636.1G6828.1	cellular organisms	1	75
Pfic	Petfic_v00_mik.OX345636.1G6838.1	cellular organisms	1	87
Pfic	Petfic_v00_mik.OX345636.1G6857.1	cellular organisms	1	100
Pfic	Petfic_v00_mik.OX345636.1G6869.1	cellular organisms	1	100
Pfic	Petfic_v00_mik.OX345636.1G6906.1	cellular organisms	1	50
Pfic	Petfic_v00_mik.OX345636.1G6908.1	cellular organisms	1	100
Pfic	Petfic_v00_mik.OX345636.1G6918.1	cellular organisms	1	75
Pfic	Petfic_v00_mik.OX345636.1G6935.1	cellular organisms	1	100
Pfic	Petfic_v00_mik.OX345636.1G6961.1	cellular organisms	1	100
Pfic	Petfic_v00_mik.OX345636.1G6978.1	cellular organisms	1	50
Pfic	Petfic_v00_mik.OX345636.1G6983.1	cellular organisms	1	100
Pfic	Petfic_v00_mik.OX345636.1G6992.1	cellular organisms	1	62
Pfic	Petfic_v00_mik.OX345636.1G6999.1	cellular organisms	1	87
Pfic	Petfic_v00_mik.OX345636.1G700.2	cellular organisms	1	75
Pfic	Petfic_v00_mik.OX345636.1G7009.1	cellular organisms	1	75
Pfic	Petfic_v00_mik.OX345636.1G7058.1	cellular organisms	1	100
Pfic	Petfic_v00_mik.OX345636.1G718.1	cellular organisms	1	75
Pfic	Petfic_v00_mik.OX345636.1G73.1	cellular organisms	1	100
Pfic	Petfic_v00_mik.OX345636.1G753.1	cellular organisms	1	87
Pfic	Petfic_v00_mik.OX345636.1G770.1	cellular organisms	1	75
Pfic	Petfic_v00_mik.OX345636.1G779.1	cellular organisms	1	100
Pfic	Petfic_v00_mik.OX345636.1G810.1	cellular organisms	1	100
Pfic	Petfic_v00_mik.OX345636.1G855.1	cellular organisms	1	100
Pfic	Petfic_v00_mik.OX345636.1G859.1	cellular organisms	1	100
Pfic	Petfic_v00_mik.OX345636.1G882.1	cellular organisms	1	100
Pfic	Petfic_v00_mik.OX345636.1G885.1	cellular organisms	1	100
Pfic	Petfic_v00_mik.OX345636.1G892.1	cellular organisms	1	75
Pfic	Petfic_v00_mik.OX345636.1G902.1	cellular organisms	1	87
Pfic	Petfic_v00_mik.OX345636.1G905.1	cellular organisms	1	75
Pfic	Petfic_v00_mik.OX345636.1G952.1	cellular organisms	1	50
Pfic	Petfic_v00_mik.OX345636.1G955.1	cellular organisms	1	100
Pfic	Petfic_v00_mik.OX345637.1G1062.1	cellular organisms	1	100
Pfic	Petfic_v00_mik.OX345637.1G107.1	cellular organisms	1	75
Pfic	Petfic_v00_mik.OX345637.1G1109.1	cellular organisms	1	100
Pfic	Petfic_v00_mik.OX345637.1G1110.1	cellular organisms	1	100
Pfic	Petfic_v00_mik.OX345637.1G1145.1	cellular organisms	1	100
Pfic	Petfic_v00_mik.OX345637.1G1216.1	cellular organisms	1	75
Pfic	Petfic_v00_mik.OX345637.1G1258.1	cellular organisms	1	100
Pfic	Petfic_v00_mik.OX345637.1G131.1	cellular organisms	1	100
Pfic	Petfic_v00_mik.OX345637.1G132.1	cellular organisms	1	100
Pfic	Petfic_v00_mik.OX345637.1G1360.2	cellular organisms	1	100
Pfic	Petfic_v00_mik.OX345637.1G1365.1	cellular organisms	1	100
Pfic	Petfic_v00_mik.OX345637.1G1389.1	cellular organisms	1	100
Pfic	Petfic_v00_mik.OX345637.1G1397.1	cellular organisms	1	100
Pfic	Petfic_v00_mik.OX345637.1G1399.1	cellular organisms	1	100
Pfic	Petfic_v00_mik.OX345637.1G1435.1	cellular organisms	1	100
Pfic	Petfic_v00_mik.OX345637.1G1460.1	cellular organisms	1	100
Pfic	Petfic_v00_mik.OX345637.1G1555.1	cellular organisms	1	100
Pfic	Petfic_v00_mik.OX345637.1G1589.1	cellular organisms	1	62
Pfic	Petfic_v00_mik.OX345637.1G1611.1	cellular organisms	1	75
Pfic	Petfic_v00_mik.OX345637.1G1662.1	cellular organisms	1	87
Pfic	Petfic_v00_mik.OX345637.1G1701.1	cellular organisms	1	37
Pfic	Petfic_v00_mik.OX345637.1G1758.1	cellular organisms	1	100
Pfic	Petfic_v00_mik.OX345637.1G1764.1	cellular organisms	1	87
Pfic	Petfic_v00_mik.OX345637.1G1832.1	cellular organisms	1	100
Pfic	Petfic_v00_mik.OX345637.1G1848.1	cellular organisms	1	100
Pfic	Petfic_v00_mik.OX345637.1G205.1	cellular organisms	1	100
Pfic	Petfic_v00_mik.OX345637.1G207.1	cellular organisms	1	75
Pfic	Petfic_v00_mik.OX345637.1G23.1	cellular organisms	1	100
Pfic	Petfic_v00_mik.OX345637.1G234.1	cellular organisms	1	100
Pfic	Petfic_v00_mik.OX345637.1G236.1	cellular organisms	1	100
Pfic	Petfic_v00_mik.OX345637.1G24.1	cellular organisms	1	87
Pfic	Petfic_v00_mik.OX345637.1G274.1	cellular organisms	1	100
Pfic	Petfic_v00_mik.OX345637.1G35.1	cellular organisms	1	100
Pfic	Petfic_v00_mik.OX345637.1G381.1	cellular organisms	1	100
Pfic	Petfic_v00_mik.OX345637.1G403.1	cellular organisms	1	100
Pfic	Petfic_v00_mik.OX345637.1G427.2	cellular organisms	1	100
Pfic	Petfic_v00_mik.OX345637.1G469.1	cellular organisms	1	100
Pfic	Petfic_v00_mik.OX345637.1G534.1	cellular organisms	1	87
Pfic	Petfic_v00_mik.OX345637.1G580.1	cellular organisms	1	100
Pfic	Petfic_v00_mik.OX345637.1G588.1	cellular organisms	1	100
Pfic	Petfic_v00_mik.OX345637.1G596.1	cellular organisms	1	100
Pfic	Petfic_v00_mik.OX345637.1G597.1	cellular organisms	1	100
Pfic	Petfic_v00_mik.OX345637.1G627.1	cellular organisms	1	87
Pfic	Petfic_v00_mik.OX345637.1G633.1	cellular organisms	1	100
Pfic	Petfic_v00_mik.OX345637.1G635.1	cellular organisms	1	100
Pfic	Petfic_v00_mik.OX345637.1G645.1	cellular organisms	1	100
Pfic	Petfic_v00_mik.OX345637.1G668.1	cellular organisms	1	100
Pfic	Petfic_v00_mik.OX345637.1G669.1	cellular organisms	1	100
Pfic	Petfic_v00_mik.OX345637.1G696.3	cellular organisms	1	100
Pfic	Petfic_v00_mik.OX345637.1G697.1	cellular organisms	1	87
Pfic	Petfic_v00_mik.OX345637.1G703.1	cellular organisms	1	100
Pfic	Petfic_v00_mik.OX345637.1G709.1	cellular organisms	1	100
Pfic	Petfic_v00_mik.OX345637.1G719.1	cellular organisms	1	100
Pfic	Petfic_v00_mik.OX345637.1G721.1	cellular organisms	1	50
Pfic	Petfic_v00_mik.OX345637.1G725.1	cellular organisms	1	62
Pfic	Petfic_v00_mik.OX345637.1G729.1	cellular organisms	1	100
Pfic	Petfic_v00_mik.OX345637.1G730.1	cellular organisms	1	100
Pfic	Petfic_v00_mik.OX345637.1G736.1	cellular organisms	1	87
Pfic	Petfic_v00_mik.OX345637.1G737.1	cellular organisms	1	87
Pfic	Petfic_v00_mik.OX345637.1G739.1	cellular organisms	1	87
Pfic	Petfic_v00_mik.OX345637.1G740.1	cellular organisms	1	87
Pfic	Petfic_v00_mik.OX345637.1G771.1	cellular organisms	1	50
Pfic	Petfic_v00_mik.OX345637.1G795.1	cellular organisms	1	75
Pfic	Petfic_v00_mik.OX345637.1G796.1	cellular organisms	1	100
Pfic	Petfic_v00_mik.OX345637.1G841.1	cellular organisms	1	100
Pfic	Petfic_v00_mik.OX345637.1G881.1	cellular organisms	1	62
Pfic	Petfic_v00_mik.OX345637.1G883.3	cellular organisms	1	100
Pfic	Petfic_v00_mik.OX345637.1G885.1	cellular organisms	1	100
Pfic	Petfic_v00_mik.OX345637.1G922.1	cellular organisms	1	87
Pfic	Petfic_v00_mik.OX345637.1G925.1	cellular organisms	1	87
Pfic	Petfic_v00_mik.OX345637.1G946.2	cellular organisms	1	100
Pfic	Petfic_v00_mik.OX345637.1G978.1	cellular organisms	1	75
Pfic	Petfic_v00_mik.OX345638.1G1003.1	cellular organisms	1	87
Pfic	Petfic_v00_mik.OX345638.1G1008.1	cellular organisms	1	100
Pfic	Petfic_v00_mik.OX345638.1G1017.1	cellular organisms	1	75
Pfic	Petfic_v00_mik.OX345638.1G1039.1	cellular organisms	1	100
Pfic	Petfic_v00_mik.OX345638.1G1048.1	cellular organisms	1	62
Pfic	Petfic_v00_mik.OX345638.1G1102.1	cellular organisms	1	62
Pfic	Petfic_v00_mik.OX345638.1G1156.1	cellular organisms	1	100
Pfic	Petfic_v00_mik.OX345638.1G1158.1	cellular organisms	1	100
Pfic	Petfic_v00_mik.OX345638.1G1166.1	cellular organisms	1	100
Pfic	Petfic_v00_mik.OX345638.1G1167.1	cellular organisms	1	62
Pfic	Petfic_v00_mik.OX345638.1G1171.1	cellular organisms	1	50
Pfic	Petfic_v00_mik.OX345638.1G1174.1	cellular organisms	1	62
Pfic	Petfic_v00_mik.OX345638.1G1175.1	cellular organisms	1	100
Pfic	Petfic_v00_mik.OX345638.1G1186.1	cellular organisms	1	100
Pfic	Petfic_v00_mik.OX345638.1G1187.1	cellular organisms	1	50
Pfic	Petfic_v00_mik.OX345638.1G1197.1	cellular organisms	1	100
Pfic	Petfic_v00_mik.OX345638.1G1221.1	cellular organisms	1	100
Pfic	Petfic_v00_mik.OX345638.1G1248.1	cellular organisms	1	100
Pfic	Petfic_v00_mik.OX345638.1G125.1	cellular organisms	1	100
Pfic	Petfic_v00_mik.OX345638.1G1269.1	cellular organisms	1	100
Pfic	Petfic_v00_mik.OX345638.1G152.1	cellular organisms	1	100
Pfic	Petfic_v00_mik.OX345638.1G154.1	cellular organisms	1	100
Pfic	Petfic_v00_mik.OX345638.1G16.1	cellular organisms	1	100
Pfic	Petfic_v00_mik.OX345638.1G177.1	cellular organisms	1	100
Pfic	Petfic_v00_mik.OX345638.1G20.1	cellular organisms	1	100
Pfic	Petfic_v00_mik.OX345638.1G246.1	cellular organisms	1	100
Pfic	Petfic_v00_mik.OX345638.1G266.1	cellular organisms	1	100
Pfic	Petfic_v00_mik.OX345638.1G279.1	cellular organisms	1	87
Pfic	Petfic_v00_mik.OX345638.1G302.1	cellular organisms	1	100
Pfic	Petfic_v00_mik.OX345638.1G306.1	cellular organisms	1	100
Pfic	Petfic_v00_mik.OX345638.1G322.1	cellular organisms	1	100
Pfic	Petfic_v00_mik.OX345638.1G331.1	cellular organisms	1	100
Pfic	Petfic_v00_mik.OX345638.1G399.1	cellular organisms	1	100
Pfic	Petfic_v00_mik.OX345638.1G412.1	cellular organisms	1	100
Pfic	Petfic_v00_mik.OX345638.1G414.1	cellular organisms	1	100
Pfic	Petfic_v00_mik.OX345638.1G424.1	cellular organisms	1	87
Pfic	Petfic_v00_mik.OX345638.1G450.1	cellular organisms	1	100
Pfic	Petfic_v00_mik.OX345638.1G555.1	cellular organisms	1	100
Pfic	Petfic_v00_mik.OX345638.1G569.1	cellular organisms	1	100
Pfic	Petfic_v00_mik.OX345638.1G577.1	cellular organisms	1	75
Pfic	Petfic_v00_mik.OX345638.1G606.1	cellular organisms	1	100
Pfic	Petfic_v00_mik.OX345638.1G640.1	cellular organisms	1	100
Pfic	Petfic_v00_mik.OX345638.1G650.1	cellular organisms	1	87
Pfic	Petfic_v00_mik.OX345638.1G651.1	cellular organisms	1	100
Pfic	Petfic_v00_mik.OX345638.1G653.1	cellular organisms	1	100
Pfic	Petfic_v00_mik.OX345638.1G654.1	cellular organisms	1	87
Pfic	Petfic_v00_mik.OX345638.1G661.1	cellular organisms	1	87
Pfic	Petfic_v00_mik.OX345638.1G663.1	cellular organisms	1	87
Pfic	Petfic_v00_mik.OX345638.1G690.1	cellular organisms	1	100
Pfic	Petfic_v00_mik.OX345638.1G710.1	cellular organisms	1	87
Pfic	Petfic_v00_mik.OX345638.1G730.1	cellular organisms	1	87
Pfic	Petfic_v00_mik.OX345638.1G740.1	cellular organisms	1	50
Pfic	Petfic_v00_mik.OX345638.1G741.1	cellular organisms	1	75
Pfic	Petfic_v00_mik.OX345638.1G742.1	cellular organisms	1	100
Pfic	Petfic_v00_mik.OX345638.1G750.1	cellular organisms	1	75
Pfic	Petfic_v00_mik.OX345638.1G772.1	cellular organisms	1	100
Pfic	Petfic_v00_mik.OX345638.1G799.1	cellular organisms	1	100
Pfic	Petfic_v00_mik.OX345638.1G807.1	cellular organisms	1	100
Pfic	Petfic_v00_mik.OX345638.1G809.1	cellular organisms	1	100
Pfic	Petfic_v00_mik.OX345638.1G821.1	cellular organisms	1	100
Pfic	Petfic_v00_mik.OX345638.1G822.1	cellular organisms	1	100
Pfic	Petfic_v00_mik.OX345638.1G854.1	cellular organisms	1	37
Pfic	Petfic_v00_mik.OX345638.1G873.1	cellular organisms	1	100
Pfic	Petfic_v00_mik.OX345638.1G881.1	cellular organisms	1	100
Pfic	Petfic_v00_mik.OX345638.1G894.1	cellular organisms	1	100
Pfic	Petfic_v00_mik.OX345638.1G898.1	cellular organisms	1	100
Pfic	Petfic_v00_mik.OX345638.1G899.1	cellular organisms	1	100
Pfic	Petfic_v00_mik.OX345638.1G901.1	cellular organisms	1	100
Pfic	Petfic_v00_mik.OX345638.1G905.1	cellular organisms	1	75
Pfic	Petfic_v00_mik.OX345638.1G936.1	cellular organisms	1	100
Pfic	Petfic_v00_mik.OX345638.1G937.1	cellular organisms	1	100
Pfic	Petfic_v00_mik.OX345638.1G941.1	cellular organisms	1	100
Pfic	Petfic_v00_mik.OX345638.1G952.1	cellular organisms	1	75
Pfic	Petfic_v00_mik.OX345638.1G957.1	cellular organisms	1	87
Pfic	Petfic_v00_mik.OX345638.1G958.1	cellular organisms	1	100
Pfic	Petfic_v00_mik.OX345638.1G964.1	cellular organisms	1	100
Pfic	Petfic_v00_mik.OX345639.1G1018.1	cellular organisms	1	100
Pfic	Petfic_v00_mik.OX345639.1G1021.1	cellular organisms	1	100
Pfic	Petfic_v00_mik.OX345639.1G1034.1	cellular organisms	1	100
Pfic	Petfic_v00_mik.OX345639.1G1090.1	cellular organisms	1	100
Pfic	Petfic_v00_mik.OX345639.1G1091.2	cellular organisms	1	100
Pfic	Petfic_v00_mik.OX345639.1G1103.1	cellular organisms	1	100
Pfic	Petfic_v00_mik.OX345639.1G1105.1	cellular organisms	1	100
Pfic	Petfic_v00_mik.OX345639.1G1126.1	cellular organisms	1	100
Pfic	Petfic_v00_mik.OX345639.1G1132.1	cellular organisms	1	100
Pfic	Petfic_v00_mik.OX345639.1G1135.1	cellular organisms	1	100
Pfic	Petfic_v00_mik.OX345639.1G1136.1	cellular organisms	1	100
Pfic	Petfic_v00_mik.OX345639.1G1146.1	cellular organisms	1	100
Pfic	Petfic_v00_mik.OX345639.1G1178.1	cellular organisms	1	100
Pfic	Petfic_v00_mik.OX345639.1G119.1	cellular organisms	1	100
Pfic	Petfic_v00_mik.OX345639.1G1206.1	cellular organisms	1	100
Pfic	Petfic_v00_mik.OX345639.1G1211.1	cellular organisms	1	87
Pfic	Petfic_v00_mik.OX345639.1G1231.1	cellular organisms	1	100
Pfic	Petfic_v00_mik.OX345639.1G1239.1	cellular organisms	1	100
Pfic	Petfic_v00_mik.OX345639.1G1240.2	cellular organisms	1	100
Pfic	Petfic_v00_mik.OX345639.1G1267.2	cellular organisms	1	100
Pfic	Petfic_v00_mik.OX345639.1G1297.1	cellular organisms	1	100
Pfic	Petfic_v00_mik.OX345639.1G130.1	cellular organisms	1	100
Pfic	Petfic_v00_mik.OX345639.1G1315.1	cellular organisms	1	100
Pfic	Petfic_v00_mik.OX345639.1G1317.1	cellular organisms	1	100
Pfic	Petfic_v00_mik.OX345639.1G1318.1	cellular organisms	1	100
Pfic	Petfic_v00_mik.OX345639.1G1319.1	cellular organisms	1	100
Pfic	Petfic_v00_mik.OX345639.1G1321.1	cellular organisms	1	62
Pfic	Petfic_v00_mik.OX345639.1G1346.1	cellular organisms	1	100
Pfic	Petfic_v00_mik.OX345639.1G140.1	cellular organisms	1	100
Pfic	Petfic_v00_mik.OX345639.1G1401.1	cellular organisms	1	100
Pfic	Petfic_v00_mik.OX345639.1G144.1	cellular organisms	1	100
Pfic	Petfic_v00_mik.OX345639.1G17.1	cellular organisms	1	100
Pfic	Petfic_v00_mik.OX345639.1G230.1	cellular organisms	1	100
Pfic	Petfic_v00_mik.OX345639.1G233.1	cellular organisms	1	100
Pfic	Petfic_v00_mik.OX345639.1G234.1	cellular organisms	1	100
Pfic	Petfic_v00_mik.OX345639.1G238.1	cellular organisms	1	100
Pfic	Petfic_v00_mik.OX345639.1G25.1	cellular organisms	1	100
Pfic	Petfic_v00_mik.OX345639.1G298.1	cellular organisms	1	87
Pfic	Petfic_v00_mik.OX345639.1G299.1	cellular organisms	1	100
Pfic	Petfic_v00_mik.OX345639.1G317.1	cellular organisms	1	100
Pfic	Petfic_v00_mik.OX345639.1G354.1	cellular organisms	1	100
Pfic	Petfic_v00_mik.OX345639.1G359.1	cellular organisms	1	100
Pfic	Petfic_v00_mik.OX345639.1G37.1	cellular organisms	1	100
Pfic	Petfic_v00_mik.OX345639.1G377.1	cellular organisms	1	100
Pfic	Petfic_v00_mik.OX345639.1G381.1	cellular organisms	1	100
Pfic	Petfic_v00_mik.OX345639.1G40.1	cellular organisms	1	100
Pfic	Petfic_v00_mik.OX345639.1G466.1	cellular organisms	1	100
Pfic	Petfic_v00_mik.OX345639.1G541.1	cellular organisms	1	100
Pfic	Petfic_v00_mik.OX345639.1G590.1	cellular organisms	1	100
Pfic	Petfic_v00_mik.OX345639.1G66.1	cellular organisms	1	100
Pfic	Petfic_v00_mik.OX345639.1G745.1	cellular organisms	1	100
Pfic	Petfic_v00_mik.OX345639.1G827.1	cellular organisms	1	100
Pfic	Petfic_v00_mik.OX345639.1G901.1	cellular organisms	1	100
Pfic	Petfic_v00_mik.OX345639.1G904.1	cellular organisms	1	100
Pfic	Petfic_v00_mik.OX345639.1G948.1	cellular organisms	1	100
Pfic	Petfic_v00_mik.OX345639.1G954.1	cellular organisms	1	100
Pfic	Petfic_v00_mik.OX345639.1G955.1	cellular organisms	1	100
Pfic	Petfic_v00_mik.OX345640.1G1001.1	cellular organisms	1	100
Pfic	Petfic_v00_mik.OX345640.1G1036.1	cellular organisms	1	100
Pfic	Petfic_v00_mik.OX345640.1G15.1	cellular organisms	1	87
Pfic	Petfic_v00_mik.OX345640.1G165.1	cellular organisms	1	100
Pfic	Petfic_v00_mik.OX345640.1G229.1	cellular organisms	1	100
Pfic	Petfic_v00_mik.OX345640.1G447.1	cellular organisms	1	100
Pfic	Petfic_v00_mik.OX345640.1G457.1	cellular organisms	1	75
Pfic	Petfic_v00_mik.OX345640.1G460.1	cellular organisms	1	100
Pfic	Petfic_v00_mik.OX345640.1G462.1	cellular organisms	1	87
Pfic	Petfic_v00_mik.OX345640.1G463.1	cellular organisms	1	87
Pfic	Petfic_v00_mik.OX345640.1G464.1	cellular organisms	1	87
Pfic	Petfic_v00_mik.OX345640.1G467.1	cellular organisms	1	75
Pfic	Petfic_v00_mik.OX345640.1G469.1	cellular organisms	1	100
Pfic	Petfic_v00_mik.OX345640.1G470.1	cellular organisms	1	100
Pfic	Petfic_v00_mik.OX345640.1G472.1	cellular organisms	1	100
Pfic	Petfic_v00_mik.OX345640.1G477.1	cellular organisms	1	100
Pfic	Petfic_v00_mik.OX345640.1G484.1	cellular organisms	1	100
Pfic	Petfic_v00_mik.OX345640.1G487.1	cellular organisms	1	87
Pfic	Petfic_v00_mik.OX345640.1G494.1	cellular organisms	1	75
Pfic	Petfic_v00_mik.OX345640.1G500.1	cellular organisms	1	75
Pfic	Petfic_v00_mik.OX345640.1G507.1	cellular organisms	1	100
Pfic	Petfic_v00_mik.OX345640.1G589.1	cellular organisms	1	87
Pfic	Petfic_v00_mik.OX345640.1G594.1	cellular organisms	1	100
Pfic	Petfic_v00_mik.OX345640.1G599.1	cellular organisms	1	75
Pfic	Petfic_v00_mik.OX345640.1G607.1	cellular organisms	1	100
Pfic	Petfic_v00_mik.OX345640.1G611.1	cellular organisms	1	100
Pfic	Petfic_v00_mik.OX345640.1G638.1	cellular organisms	1	100
Pfic	Petfic_v00_mik.OX345640.1G644.1	cellular organisms	1	100
Pfic	Petfic_v00_mik.OX345640.1G652.1	cellular organisms	1	87
Pfic	Petfic_v00_mik.OX345640.1G680.1	cellular organisms	1	87
Pfic	Petfic_v00_mik.OX345640.1G699.1	cellular organisms	1	100
Pfic	Petfic_v00_mik.OX345640.1G714.1	cellular organisms	1	87
Pfic	Petfic_v00_mik.OX345640.1G77.1	cellular organisms	1	100
Pfic	Petfic_v00_mik.OX345640.1G806.1	cellular organisms	1	100
Pfic	Petfic_v00_mik.OX345640.1G825.1	cellular organisms	1	100
Pfic	Petfic_v00_mik.OX345640.1G848.1	cellular organisms	1	100
Pfic	Petfic_v00_mik.OX345640.1G854.1	cellular organisms	1	100
Pfic	Petfic_v00_mik.OX345640.1G877.1	cellular organisms	1	100
Pfic	Petfic_v00_mik.OX345640.1G885.1	cellular organisms	1	100
Pfic	Petfic_v00_mik.OX345640.1G93.1	cellular organisms	1	100
Pfic	Petfic_v00_mik.OX345640.1G932.1	cellular organisms	1	62
Pfic	Petfic_v00_mik.OX345640.1G933.1	cellular organisms	1	50
Pfic	Petfic_v00_mik.OX345640.1G934.1	cellular organisms	1	50
Pfic	Petfic_v00_mik.OX345640.1G935.1	cellular organisms	1	75
Pfic	Petfic_v00_mik.OX345640.1G936.1	cellular organisms	1	50
Pfic	Petfic_v00_mik.OX345640.1G938.1	cellular organisms	1	62
Pfic	Petfic_v00_mik.OX345640.1G945.1	cellular organisms	1	75
Pfic	Petfic_v00_mik.OX345640.1G951.1	cellular organisms	1	75
Pfic	Petfic_v00_mik.OX345640.1G980.1	cellular organisms	1	100
Pfic	Petfic_v00_mik.OX345641.1G1027.1	cellular organisms	1	100
Pfic	Petfic_v00_mik.OX345641.1G226.1	cellular organisms	1	100
Pfic	Petfic_v00_mik.OX345641.1G231.1	cellular organisms	1	100
Pfic	Petfic_v00_mik.OX345641.1G320.1	cellular organisms	1	100
Pfic	Petfic_v00_mik.OX345641.1G326.1	cellular organisms	1	87
Pfic	Petfic_v00_mik.OX345641.1G346.1	cellular organisms	1	100
Pfic	Petfic_v00_mik.OX345641.1G376.1	cellular organisms	1	100
Pfic	Petfic_v00_mik.OX345641.1G383.1	cellular organisms	1	100
Pfic	Petfic_v00_mik.OX345641.1G39.1	cellular organisms	1	100
Pfic	Petfic_v00_mik.OX345641.1G418.1	cellular organisms	1	100
Pfic	Petfic_v00_mik.OX345641.1G488.1	cellular organisms	1	50
Pfic	Petfic_v00_mik.OX345641.1G506.1	cellular organisms	1	100
Pfic	Petfic_v00_mik.OX345641.1G544.1	cellular organisms	1	100
Pfic	Petfic_v00_mik.OX345641.1G550.1	cellular organisms	1	100
Pfic	Petfic_v00_mik.OX345641.1G610.1	cellular organisms	1	75
Pfic	Petfic_v00_mik.OX345641.1G616.1	cellular organisms	1	100
Pfic	Petfic_v00_mik.OX345641.1G618.1	cellular organisms	1	100
Pfic	Petfic_v00_mik.OX345641.1G638.1	cellular organisms	1	75
Pfic	Petfic_v00_mik.OX345641.1G645.1	cellular organisms	1	100
Pfic	Petfic_v00_mik.OX345641.1G661.1	cellular organisms	1	87
Pfic	Petfic_v00_mik.OX345641.1G665.1	cellular organisms	1	100
Pfic	Petfic_v00_mik.OX345641.1G695.1	cellular organisms	1	100
Pfic	Petfic_v00_mik.OX345641.1G724.1	cellular organisms	1	87
Pfic	Petfic_v00_mik.OX345641.1G92.1	cellular organisms	1	87
Pfic	Petfic_v00_mik.OX345641.1G93.1	cellular organisms	1	87
Pfic	Petfic_v00_mik.OX345642.1G109.1	cellular organisms	1	100
Pfic	Petfic_v00_mik.OX345642.1G121.1	cellular organisms	1	100
Pfic	Petfic_v00_mik.OX345642.1G247.1	cellular organisms	1	62
Pfic	Petfic_v00_mik.OX345642.1G269.1	cellular organisms	1	100
Pfic	Petfic_v00_mik.OX345642.1G282.1	cellular organisms	1	87
Pfic	Petfic_v00_mik.OX345642.1G294.1	cellular organisms	1	87
Pfic	Petfic_v00_mik.OX345642.1G331.1	cellular organisms	1	100
Pfic	Petfic_v00_mik.OX345642.1G337.1	cellular organisms	1	100
Pfic	Petfic_v00_mik.OX345642.1G339.1	cellular organisms	1	100
Pfic	Petfic_v00_mik.OX345642.1G360.1	cellular organisms	1	100
Pfic	Petfic_v00_mik.OX345642.1G392.1	cellular organisms	1	100
Pfic	Petfic_v00_mik.OX345642.1G455.1	cellular organisms	1	100
Pfic	Petfic_v00_mik.OX345642.1G474.1	cellular organisms	1	100
Pfic	Petfic_v00_mik.OX345642.1G493.1	cellular organisms	1	100
Pfic	Petfic_v00_mik.OX345642.1G519.1	cellular organisms	1	100
Pfic	Petfic_v00_mik.OX345642.1G542.1	cellular organisms	1	87
Pfic	Petfic_v00_mik.OX345642.1G554.1	cellular organisms	1	100
Pfic	Petfic_v00_mik.OX345642.1G585.1	cellular organisms	1	100
Pfic	Petfic_v00_mik.OX345642.1G614.1	cellular organisms	1	100
Pfic	Petfic_v00_mik.OX345642.1G658.1	cellular organisms	1	100
Pfic	Petfic_v00_mik.OX345642.1G659.1	cellular organisms	1	100
Pfic	Petfic_v00_mik.OX345642.1G675.1	cellular organisms	1	100
Pfic	Petfic_v00_mik.OX345642.1G754.1	cellular organisms	1	100
Pfic	Petfic_v00_mik.OX345642.1G757.1	cellular organisms	1	100
Pfic	Petfic_v00_mik.OX345642.1G762.1	cellular organisms	1	100
Pfic	Petfic_v00_mik.OX345642.1G830.1	cellular organisms	1	100
Pfic	Petfic_v00_mik.OX345642.1G837.1	cellular organisms	1	100
Pfic	Petfic_v00_mik.OX345642.1G838.1	cellular organisms	1	100
Pfic	Petfic_v00_mik.OX345642.1G85.1	cellular organisms	1	100
Pfic	Petfic_v00_mik.OX345642.1G859.2	cellular organisms	1	100
Pfic	Petfic_v00_mik.OX345642.1G933.1	cellular organisms	1	100
Pfic	Petfic_v00_mik.OX345642.1G959.1	cellular organisms	1	100
Pfic	Petfic_v00_mik.OX345642.1G972.1	cellular organisms	1	100
Pfic	Petfic_v00_mik.OX345642.1G975.1	cellular organisms	1	100
Pfic	Petfic_v00_mik.OX345642.1G996.1	cellular organisms	1	100
Pfic	Petfic_v00_mik.OX345643.1G105.1	cellular organisms	1	100
Pfic	Petfic_v00_mik.OX345643.1G109.1	cellular organisms	1	100
Pfic	Petfic_v00_mik.OX345643.1G110.1	cellular organisms	1	100
Pfic	Petfic_v00_mik.OX345643.1G113.1	cellular organisms	1	100
Pfic	Petfic_v00_mik.OX345643.1G114.1	cellular organisms	1	100
Pfic	Petfic_v00_mik.OX345643.1G115.1	cellular organisms	1	100
Pfic	Petfic_v00_mik.OX345643.1G148.1	cellular organisms	1	100
Pfic	Petfic_v00_mik.OX345643.1G151.1	cellular organisms	1	100
Pfic	Petfic_v00_mik.OX345643.1G197.2	cellular organisms	1	100
Pfic	Petfic_v00_mik.OX345643.1G198.1	cellular organisms	1	100
Pfic	Petfic_v00_mik.OX345643.1G260.1	cellular organisms	1	100
Pfic	Petfic_v00_mik.OX345643.1G295.1	cellular organisms	1	100
Pfic	Petfic_v00_mik.OX345643.1G344.1	cellular organisms	1	87
Pfic	Petfic_v00_mik.OX345643.1G371.1	cellular organisms	1	100
Pfic	Petfic_v00_mik.OX345643.1G386.1	cellular organisms	1	100
Pfic	Petfic_v00_mik.OX345643.1G387.1	cellular organisms	1	100
Pfic	Petfic_v00_mik.OX345643.1G41.1	cellular organisms	1	100
Pfic	Petfic_v00_mik.OX345643.1G431.1	cellular organisms	1	100
Pfic	Petfic_v00_mik.OX345643.1G489.1	cellular organisms	1	100
Pfic	Petfic_v00_mik.OX345643.1G50.1	cellular organisms	1	100
Pfic	Petfic_v00_mik.OX345643.1G507.1	cellular organisms	1	100
Pfic	Petfic_v00_mik.OX345643.1G52.1	cellular organisms	1	100
Pfic	Petfic_v00_mik.OX345643.1G548.1	cellular organisms	1	100
Pfic	Petfic_v00_mik.OX345643.1G553.1	cellular organisms	1	100
Pfic	Petfic_v00_mik.OX345643.1G562.1	cellular organisms	1	100
Pfic	Petfic_v00_mik.OX345643.1G563.1	cellular organisms	1	100
Pfic	Petfic_v00_mik.OX345643.1G581.1	cellular organisms	1	100
Pfic	Petfic_v00_mik.OX345643.1G584.1	cellular organisms	1	100
Pfic	Petfic_v00_mik.OX345643.1G590.1	cellular organisms	1	100
Pfic	Petfic_v00_mik.OX345643.1G669.1	cellular organisms	1	100
Pfic	Petfic_v00_mik.OX345643.1G671.1	cellular organisms	1	100
Pfic	Petfic_v00_mik.OX345643.1G730.1	cellular organisms	1	100
Pfic	Petfic_v00_mik.OX345643.1G742.1	cellular organisms	1	100
Pfic	Petfic_v00_mik.OX345643.1G744.1	cellular organisms	1	100
Pfic	Petfic_v00_mik.OX345643.1G754.1	cellular organisms	1	100
Pfic	Petfic_v00_mik.OX345643.1G807.1	cellular organisms	1	100
Pfic	Petfic_v00_mik.OX345644.1G103.1	cellular organisms	1	75
Pfic	Petfic_v00_mik.OX345644.1G104.1	cellular organisms	1	100
Pfic	Petfic_v00_mik.OX345644.1G122.1	cellular organisms	1	100
Pfic	Petfic_v00_mik.OX345644.1G147.1	cellular organisms	1	100
Pfic	Petfic_v00_mik.OX345644.1G180.1	cellular organisms	1	100
Pfic	Petfic_v00_mik.OX345644.1G194.1	cellular organisms	1	100
Pfic	Petfic_v00_mik.OX345644.1G226.2	cellular organisms	1	100
Pfic	Petfic_v00_mik.OX345644.1G230.2	cellular organisms	1	100
Pfic	Petfic_v00_mik.OX345644.1G304.1	cellular organisms	1	100
Pfic	Petfic_v00_mik.OX345644.1G316.1	cellular organisms	1	100
Pfic	Petfic_v00_mik.OX345644.1G327.1	cellular organisms	1	100
Pfic	Petfic_v00_mik.OX345644.1G350.1	cellular organisms	1	100
Pfic	Petfic_v00_mik.OX345644.1G352.1	cellular organisms	1	100
Pfic	Petfic_v00_mik.OX345644.1G364.1	cellular organisms	1	100
Pfic	Petfic_v00_mik.OX345644.1G382.1	cellular organisms	1	100
Pfic	Petfic_v00_mik.OX345644.1G394.1	cellular organisms	1	100
Pfic	Petfic_v00_mik.OX345644.1G437.1	cellular organisms	1	100
Pfic	Petfic_v00_mik.OX345644.1G471.2	cellular organisms	1	75
Pfic	Petfic_v00_mik.OX345644.1G532.1	cellular organisms	1	100
Pfic	Petfic_v00_mik.OX345644.1G534.1	cellular organisms	1	87
Pfic	Petfic_v00_mik.OX345644.1G536.1	cellular organisms	1	100
Pfic	Petfic_v00_mik.OX345644.1G546.1	cellular organisms	1	100
Pfic	Petfic_v00_mik.OX345644.1G557.1	cellular organisms	1	100
Pfic	Petfic_v00_mik.OX345644.1G589.1	cellular organisms	1	100
Pfic	Petfic_v00_mik.OX345644.1G634.1	cellular organisms	1	100
Pfic	Petfic_v00_mik.OX345644.1G646.1	cellular organisms	1	100
Pfic	Petfic_v00_mik.OX345644.1G663.1	cellular organisms	1	100
Pfic	Petfic_v00_mik.OX345644.1G681.1	cellular organisms	1	75
Pfic	Petfic_v00_mik.OX345644.1G689.1	cellular organisms	1	87
Pfic	Petfic_v00_mik.OX345644.1G693.1	cellular organisms	1	100
Pfic	Petfic_v00_mik.OX345644.1G720.1	cellular organisms	1	100
Pfic	Petfic_v00_mik.OX345644.1G785.2	cellular organisms	1	100
Pfic	Petfic_v00_mik.OX345644.1G789.1	cellular organisms	1	100
Pfic	Petfic_v00_mik.OX345644.1G791.1	cellular organisms	1	100
Pfic	Petfic_v00_mik.OX345644.1G799.1	cellular organisms	1	100
Pfic	Petfic_v00_mik.OX345644.1G805.1	cellular organisms	1	100
Pfic	Petfic_v00_mik.OX345644.1G807.1	cellular organisms	1	100
Pfic	Petfic_v00_mik.OX345644.1G809.1	cellular organisms	1	100
Pfic	Petfic_v00_mik.OX345644.1G810.1	cellular organisms	1	87
Pfic	Petfic_v00_mik.OX345644.1G814.1	cellular organisms	1	100
Pfic	Petfic_v00_mik.OX345644.1G823.1	cellular organisms	1	100
Pfic	Petfic_v00_mik.OX345644.1G824.1	cellular organisms	1	100
Pfic	Petfic_v00_mik.OX345644.1G830.1	cellular organisms	1	100
Pfic	Petfic_v00_mik.OX345644.1G831.1	cellular organisms	1	100
Pfic	Petfic_v00_mik.OX345644.1G846.1	cellular organisms	1	100
Pfic	Petfic_v00_mik.OX345644.1G847.1	cellular organisms	1	100
Pfic	Petfic_v00_mik.OX345644.1G85.1	cellular organisms	1	100
Pfic	Petfic_v00_mik.OX345644.1G850.1	cellular organisms	1	75
Pfic	Petfic_v00_mik.OX345644.1G90.1	cellular organisms	1	100
Pfic	Petfic_v00_mik.OX345645.1G137.1	cellular organisms	1	100
Pfic	Petfic_v00_mik.OX345645.1G155.1	cellular organisms	1	75
Pfic	Petfic_v00_mik.OX345645.1G157.1	cellular organisms	1	100
Pfic	Petfic_v00_mik.OX345645.1G168.1	cellular organisms	1	87
Pfic	Petfic_v00_mik.OX345645.1G171.1	cellular organisms	1	100
Pfic	Petfic_v00_mik.OX345645.1G310.1	cellular organisms	1	100
Pfic	Petfic_v00_mik.OX345645.1G330.1	cellular organisms	1	87
Pfic	Petfic_v00_mik.OX345645.1G363.1	cellular organisms	1	100
Pfic	Petfic_v00_mik.OX345645.1G402.1	cellular organisms	1	100
Pfic	Petfic_v00_mik.OX345645.1G424.1	cellular organisms	1	100
Pfic	Petfic_v00_mik.OX345645.1G429.1	cellular organisms	1	100
Pfic	Petfic_v00_mik.OX345645.1G431.2	cellular organisms	1	100
Pfic	Petfic_v00_mik.OX345645.1G433.1	cellular organisms	1	87
Pfic	Petfic_v00_mik.OX345645.1G435.1	cellular organisms	1	87
Pfic	Petfic_v00_mik.OX345645.1G436.1	cellular organisms	1	75
Pfic	Petfic_v00_mik.OX345645.1G437.1	cellular organisms	1	87
Pfic	Petfic_v00_mik.OX345645.1G439.1	cellular organisms	1	87
Pfic	Petfic_v00_mik.OX345645.1G449.1	cellular organisms	1	100
Pfic	Petfic_v00_mik.OX345645.1G452.1	cellular organisms	1	87
Pfic	Petfic_v00_mik.OX345645.1G454.1	cellular organisms	1	100
Pfic	Petfic_v00_mik.OX345645.1G481.1	cellular organisms	1	100
Pfic	Petfic_v00_mik.OX345645.1G520.1	cellular organisms	1	100
Pfic	Petfic_v00_mik.OX345645.1G58.1	cellular organisms	1	100
Pfic	Petfic_v00_mik.OX345645.1G586.1	cellular organisms	1	100
Pfic	Petfic_v00_mik.OX345645.1G603.1	cellular organisms	1	100
Pfic	Petfic_v00_mik.OX345645.1G610.1	cellular organisms	1	100
Pfic	Petfic_v00_mik.OX345645.1G652.1	cellular organisms	1	100
Pfic	Petfic_v00_mik.OX345645.1G654.1	cellular organisms	1	100
Pfic	Petfic_v00_mik.OX345645.1G679.1	cellular organisms	1	87
Pfic	Petfic_v00_mik.OX345645.1G695.1	cellular organisms	1	75
Pfic	Petfic_v00_mik.OX345645.1G697.1	cellular organisms	1	87
Pfic	Petfic_v00_mik.OX345645.1G704.1	cellular organisms	1	100
Pfic	Petfic_v00_mik.OX345645.1G707.1	cellular organisms	1	100
Pfic	Petfic_v00_mik.OX345645.1G725.1	cellular organisms	1	100
Pfic	Petfic_v00_mik.OX345645.1G729.1	cellular organisms	1	100
Pfic	Petfic_v00_mik.OX345645.1G735.1	cellular organisms	1	62
Pfic	Petfic_v00_mik.OX345645.1G747.1	cellular organisms	1	100
Pfic	Petfic_v00_mik.OX345645.1G755.1	cellular organisms	1	100
Pfic	Petfic_v00_mik.OX345645.1G763.1	cellular organisms	1	87
Pfic	Petfic_v00_mik.OX345645.1G786.1	cellular organisms	1	100
Pfic	Petfic_v00_mik.OX345645.1G892.1	cellular organisms	1	100
Pfic	Petfic_v00_mik.OX345645.1G897.1	cellular organisms	1	100
Pfic	Petfic_v00_mik.OX345646.1G135.1	cellular organisms	1	100
Pfic	Petfic_v00_mik.OX345646.1G174.1	cellular organisms	1	75
Pfic	Petfic_v00_mik.OX345646.1G191.1	cellular organisms	1	100
Pfic	Petfic_v00_mik.OX345646.1G202.2	cellular organisms	1	100
Pfic	Petfic_v00_mik.OX345646.1G216.1	cellular organisms	1	100
Pfic	Petfic_v00_mik.OX345646.1G228.1	cellular organisms	1	62
Pfic	Petfic_v00_mik.OX345646.1G235.1	cellular organisms	1	62
Pfic	Petfic_v00_mik.OX345646.1G253.1	cellular organisms	1	62
Pfic	Petfic_v00_mik.OX345646.1G254.1	cellular organisms	1	62
Pfic	Petfic_v00_mik.OX345646.1G256.1	cellular organisms	1	62
Pfic	Petfic_v00_mik.OX345646.1G258.1	cellular organisms	1	75
Pfic	Petfic_v00_mik.OX345646.1G261.1	cellular organisms	1	62
Pfic	Petfic_v00_mik.OX345646.1G290.1	cellular organisms	1	100
Pfic	Petfic_v00_mik.OX345646.1G314.1	cellular organisms	1	87
Pfic	Petfic_v00_mik.OX345646.1G324.1	cellular organisms	1	100
Pfic	Petfic_v00_mik.OX345646.1G338.1	cellular organisms	1	100
Pfic	Petfic_v00_mik.OX345646.1G349.1	cellular organisms	1	87
Pfic	Petfic_v00_mik.OX345646.1G351.1	cellular organisms	1	100
Pfic	Petfic_v00_mik.OX345646.1G359.1	cellular organisms	1	100
Pfic	Petfic_v00_mik.OX345646.1G420.1	cellular organisms	1	62
Pfic	Petfic_v00_mik.OX345646.1G514.1	cellular organisms	1	87
Pfic	Petfic_v00_mik.OX345646.1G517.1	cellular organisms	1	100
Pfic	Petfic_v00_mik.OX345646.1G528.1	cellular organisms	1	100
Pfic	Petfic_v00_mik.OX345646.1G605.1	cellular organisms	1	100
Pfic	Petfic_v00_mik.OX345646.1G671.1	cellular organisms	1	100
Pfic	Petfic_v00_mik.OX345646.1G730.2	cellular organisms	1	100
Pfic	Petfic_v00_mik.OX345647.1G10.3	cellular organisms	1	100
Pfic	Petfic_v00_mik.OX345647.1G137.1	cellular organisms	1	100
Pfic	Petfic_v00_mik.OX345647.1G152.1	cellular organisms	1	100
Pfic	Petfic_v00_mik.OX345647.1G154.1	cellular organisms	1	100
Pfic	Petfic_v00_mik.OX345647.1G174.1	cellular organisms	1	100
Pfic	Petfic_v00_mik.OX345647.1G200.1	cellular organisms	1	87
Pfic	Petfic_v00_mik.OX345647.1G212.1	cellular organisms	1	87
Pfic	Petfic_v00_mik.OX345647.1G213.1	cellular organisms	1	100
Pfic	Petfic_v00_mik.OX345647.1G229.1	cellular organisms	1	100
Pfic	Petfic_v00_mik.OX345647.1G244.1	cellular organisms	1	100
Pfic	Petfic_v00_mik.OX345647.1G330.1	cellular organisms	1	100
Pfic	Petfic_v00_mik.OX345647.1G332.1	cellular organisms	1	87
Pfic	Petfic_v00_mik.OX345647.1G338.1	cellular organisms	1	100
Pfic	Petfic_v00_mik.OX345647.1G366.1	cellular organisms	1	100
Pfic	Petfic_v00_mik.OX345647.1G369.1	cellular organisms	1	100
Pfic	Petfic_v00_mik.OX345647.1G377.1	cellular organisms	1	100
Pfic	Petfic_v00_mik.OX345647.1G378.1	cellular organisms	1	100
Pfic	Petfic_v00_mik.OX345647.1G380.1	cellular organisms	1	100
Pfic	Petfic_v00_mik.OX345647.1G434.1	cellular organisms	1	100
Pfic	Petfic_v00_mik.OX345647.1G446.1	cellular organisms	1	100
Pfic	Petfic_v00_mik.OX345647.1G47.1	cellular organisms	1	100
Pfic	Petfic_v00_mik.OX345647.1G48.1	cellular organisms	1	100
Pfic	Petfic_v00_mik.OX345647.1G480.1	cellular organisms	1	75
Pfic	Petfic_v00_mik.OX345647.1G49.1	cellular organisms	1	100
Pfic	Petfic_v00_mik.OX345647.1G59.1	cellular organisms	1	100
Pfic	Petfic_v00_mik.OX345647.1G629.1	cellular organisms	1	75
Pfic	Petfic_v00_mik.OX345647.1G655.2	cellular organisms	1	100
Pfic	Petfic_v00_mik.OX345647.1G706.1	cellular organisms	1	100
Pfic	Petfic_v00_mik.OX345647.1G96.1	cellular organisms	1	100
Pfic	Petfic_v00_mik.OX345647.1G98.1	cellular organisms	1	100
Pfic	Petfic_v00_mik.OX345647.1G99.1	cellular organisms	1	100
Pfic	Petfic_v00_mik.OX345648.1G10.1	cellular organisms	1	100
Pfic	Petfic_v00_mik.OX345648.1G142.1	cellular organisms	1	100
Pfic	Petfic_v00_mik.OX345648.1G143.1	cellular organisms	1	87
Pfic	Petfic_v00_mik.OX345648.1G156.1	cellular organisms	1	87
Pfic	Petfic_v00_mik.OX345648.1G166.1	cellular organisms	1	75
Pfic	Petfic_v00_mik.OX345648.1G19.2	cellular organisms	1	100
Pfic	Petfic_v00_mik.OX345648.1G190.1	cellular organisms	1	100
Pfic	Petfic_v00_mik.OX345648.1G216.1	cellular organisms	1	100
Pfic	Petfic_v00_mik.OX345648.1G273.1	cellular organisms	1	100
Pfic	Petfic_v00_mik.OX345648.1G291.1	cellular organisms	1	100
Pfic	Petfic_v00_mik.OX345648.1G295.1	cellular organisms	1	75
Pfic	Petfic_v00_mik.OX345648.1G305.1	cellular organisms	1	87
Pfic	Petfic_v00_mik.OX345648.1G368.1	cellular organisms	1	100
Pfic	Petfic_v00_mik.OX345648.1G387.1	cellular organisms	1	100
Pfic	Petfic_v00_mik.OX345648.1G404.1	cellular organisms	1	100
Pfic	Petfic_v00_mik.OX345648.1G411.1	cellular organisms	1	100
Pfic	Petfic_v00_mik.OX345648.1G441.1	cellular organisms	1	100
Pfic	Petfic_v00_mik.OX345648.1G522.1	cellular organisms	1	62
Pfic	Petfic_v00_mik.OX345648.1G523.1	cellular organisms	1	62
Pfic	Petfic_v00_mik.OX345648.1G57.1	cellular organisms	1	100
Pfic	Petfic_v00_mik.OX345648.1G577.1	cellular organisms	1	100
Pfic	Petfic_v00_mik.OX345648.1G584.1	cellular organisms	1	100
Pfic	Petfic_v00_mik.OX345648.1G703.1	cellular organisms	1	100
Pfic	Petfic_v00_mik.OX345648.1G757.1	cellular organisms	1	100
Pfic	Petfic_v00_mik.OX345648.1G760.1	cellular organisms	1	100
Pfic	Petfic_v00_mik.OX345648.1G774.1	cellular organisms	1	100
Pfic	Petfic_v00_mik.OX345648.1G823.1	cellular organisms	1	100
Pfic	Petfic_v00_mik.OX345648.1G90.1	cellular organisms	1	100
Pfic	Petfic_v00_mik.OX345649.1G101.1	cellular organisms	1	100
Pfic	Petfic_v00_mik.OX345649.1G124.1	cellular organisms	1	100
Pfic	Petfic_v00_mik.OX345649.1G125.1	cellular organisms	1	100
Pfic	Petfic_v00_mik.OX345649.1G129.1	cellular organisms	1	100
Pfic	Petfic_v00_mik.OX345649.1G13.1	cellular organisms	1	100
Pfic	Petfic_v00_mik.OX345649.1G130.1	cellular organisms	1	100
Pfic	Petfic_v00_mik.OX345649.1G19.1	cellular organisms	1	100
Pfic	Petfic_v00_mik.OX345649.1G193.1	cellular organisms	1	100
Pfic	Petfic_v00_mik.OX345649.1G237.1	cellular organisms	1	100
Pfic	Petfic_v00_mik.OX345649.1G328.1	cellular organisms	1	100
Pfic	Petfic_v00_mik.OX345649.1G380.1	cellular organisms	1	100
Pfic	Petfic_v00_mik.OX345649.1G399.1	cellular organisms	1	75
Pfic	Petfic_v00_mik.OX345649.1G400.1	cellular organisms	1	75
Pfic	Petfic_v00_mik.OX345649.1G409.1	cellular organisms	1	37
Pfic	Petfic_v00_mik.OX345649.1G413.1	cellular organisms	1	100
Pfic	Petfic_v00_mik.OX345649.1G421.1	cellular organisms	1	100
Pfic	Petfic_v00_mik.OX345649.1G440.1	cellular organisms	1	87
Pfic	Petfic_v00_mik.OX345649.1G458.1	cellular organisms	1	100
Pfic	Petfic_v00_mik.OX345649.1G490.1	cellular organisms	1	100
Pfic	Petfic_v00_mik.OX345649.1G518.1	cellular organisms	1	100
Pfic	Petfic_v00_mik.OX345649.1G547.1	cellular organisms	1	100
Pfic	Petfic_v00_mik.OX345649.1G562.1	cellular organisms	1	100
Pfic	Petfic_v00_mik.OX345649.1G657.1	cellular organisms	1	100
Pfic	Petfic_v00_mik.OX345649.1G669.1	cellular organisms	1	100
Pfic	Petfic_v00_mik.OX345649.1G760.1	cellular organisms	1	100
Pfic	Petfic_v00_mik.OX345649.1G838.1	cellular organisms	1	75
Pfic	Petfic_v00_mik.OX345649.1G98.1	cellular organisms	1	100
Pfic	Petfic_v00_mik.OX345650.1G149.2	cellular organisms	1	100
Pfic	Petfic_v00_mik.OX345650.1G150.1	cellular organisms	1	100
Pfic	Petfic_v00_mik.OX345650.1G158.1	cellular organisms	1	100
Pfic	Petfic_v00_mik.OX345650.1G160.1	cellular organisms	1	100
Pfic	Petfic_v00_mik.OX345650.1G165.1	cellular organisms	1	87
Pfic	Petfic_v00_mik.OX345650.1G186.1	cellular organisms	1	100
Pfic	Petfic_v00_mik.OX345650.1G214.1	cellular organisms	1	87
Pfic	Petfic_v00_mik.OX345650.1G229.1	cellular organisms	1	37
Pfic	Petfic_v00_mik.OX345650.1G265.1	cellular organisms	1	62
Pfic	Petfic_v00_mik.OX345650.1G277.1	cellular organisms	1	62
Pfic	Petfic_v00_mik.OX345650.1G280.1	cellular organisms	1	37
Pfic	Petfic_v00_mik.OX345650.1G283.1	cellular organisms	1	62
Pfic	Petfic_v00_mik.OX345650.1G286.1	cellular organisms	1	50
Pfic	Petfic_v00_mik.OX345650.1G287.1	cellular organisms	1	75
Pfic	Petfic_v00_mik.OX345650.1G288.1	cellular organisms	1	75
Pfic	Petfic_v00_mik.OX345650.1G289.1	cellular organisms	1	75
Pfic	Petfic_v00_mik.OX345650.1G299.1	cellular organisms	1	100
Pfic	Petfic_v00_mik.OX345650.1G303.1	cellular organisms	1	87
Pfic	Petfic_v00_mik.OX345650.1G305.1	cellular organisms	1	100
Pfic	Petfic_v00_mik.OX345650.1G317.1	cellular organisms	1	100
Pfic	Petfic_v00_mik.OX345650.1G328.1	cellular organisms	1	75
Pfic	Petfic_v00_mik.OX345650.1G334.1	cellular organisms	1	100
Pfic	Petfic_v00_mik.OX345650.1G409.1	cellular organisms	1	87
Pfic	Petfic_v00_mik.OX345650.1G464.1	cellular organisms	1	87
Pfic	Petfic_v00_mik.OX345650.1G467.1	cellular organisms	1	100
Pfic	Petfic_v00_mik.OX345650.1G471.1	cellular organisms	1	100
Pfic	Petfic_v00_mik.OX345650.1G484.1	cellular organisms	1	100
Pfic	Petfic_v00_mik.OX345650.1G514.1	cellular organisms	1	62
Pfic	Petfic_v00_mik.OX345650.1G521.1	cellular organisms	1	75
Pfic	Petfic_v00_mik.OX345650.1G529.1	cellular organisms	1	75
Pfic	Petfic_v00_mik.OX345650.1G538.1	cellular organisms	1	50
Pfic	Petfic_v00_mik.OX345650.1G560.1	cellular organisms	1	87
Pfic	Petfic_v00_mik.OX345650.1G564.1	cellular organisms	1	100
Pfic	Petfic_v00_mik.OX345650.1G569.1	cellular organisms	1	75
Pfic	Petfic_v00_mik.OX345650.1G572.1	cellular organisms	1	100
Pfic	Petfic_v00_mik.OX345650.1G580.1	cellular organisms	1	100
Pfic	Petfic_v00_mik.OX345650.1G582.1	cellular organisms	1	87
Pfic	Petfic_v00_mik.OX345650.1G615.1	cellular organisms	1	100
Pfic	Petfic_v00_mik.OX345650.1G638.1	cellular organisms	1	100
Pfic	Petfic_v00_mik.OX345650.1G639.1	cellular organisms	1	100
Pfic	Petfic_v00_mik.OX345650.1G644.1	cellular organisms	1	100
Pfic	Petfic_v00_mik.OX345650.1G692.1	cellular organisms	1	100
Pfic	Petfic_v00_mik.OX345650.1G750.1	cellular organisms	1	100
Pfic	Petfic_v00_mik.OX345650.1G751.1	cellular organisms	1	87
Pfic	Petfic_v00_mik.OX345651.1G114.1	cellular organisms	1	100
Pfic	Petfic_v00_mik.OX345651.1G175.1	cellular organisms	1	100
Pfic	Petfic_v00_mik.OX345651.1G190.1	cellular organisms	1	100
Pfic	Petfic_v00_mik.OX345651.1G212.1	cellular organisms	1	100
Pfic	Petfic_v00_mik.OX345651.1G249.1	cellular organisms	1	87
Pfic	Petfic_v00_mik.OX345651.1G252.1	cellular organisms	1	75
Pfic	Petfic_v00_mik.OX345651.1G253.1	cellular organisms	1	100
Pfic	Petfic_v00_mik.OX345651.1G255.1	cellular organisms	1	100
Pfic	Petfic_v00_mik.OX345651.1G256.1	cellular organisms	1	100
Pfic	Petfic_v00_mik.OX345651.1G258.1	cellular organisms	1	100
Pfic	Petfic_v00_mik.OX345651.1G268.1	cellular organisms	1	100
Pfic	Petfic_v00_mik.OX345651.1G279.1	cellular organisms	1	100
Pfic	Petfic_v00_mik.OX345651.1G313.1	cellular organisms	1	75
Pfic	Petfic_v00_mik.OX345651.1G353.1	cellular organisms	1	100
Pfic	Petfic_v00_mik.OX345651.1G354.1	cellular organisms	1	100
Pfic	Petfic_v00_mik.OX345651.1G362.1	cellular organisms	1	100
Pfic	Petfic_v00_mik.OX345651.1G367.1	cellular organisms	1	100
Pfic	Petfic_v00_mik.OX345651.1G375.1	cellular organisms	1	100
Pfic	Petfic_v00_mik.OX345651.1G378.1	cellular organisms	1	100
Pfic	Petfic_v00_mik.OX345651.1G379.1	cellular organisms	1	100
Pfic	Petfic_v00_mik.OX345651.1G401.1	cellular organisms	1	100
Pfic	Petfic_v00_mik.OX345651.1G410.1	cellular organisms	1	100
Pfic	Petfic_v00_mik.OX345651.1G412.1	cellular organisms	1	100
Pfic	Petfic_v00_mik.OX345651.1G414.1	cellular organisms	1	100
Pfic	Petfic_v00_mik.OX345651.1G424.1	cellular organisms	1	100
Pfic	Petfic_v00_mik.OX345651.1G428.1	cellular organisms	1	75
Pfic	Petfic_v00_mik.OX345651.1G433.1	cellular organisms	1	100
Pfic	Petfic_v00_mik.OX345651.1G45.1	cellular organisms	1	100
Pfic	Petfic_v00_mik.OX345651.1G509.1	cellular organisms	1	87
Pfic	Petfic_v00_mik.OX345651.1G511.1	cellular organisms	1	100
Pfic	Petfic_v00_mik.OX345651.1G512.1	cellular organisms	1	87
Pfic	Petfic_v00_mik.OX345651.1G525.1	cellular organisms	1	87
Pfic	Petfic_v00_mik.OX345651.1G55.1	cellular organisms	1	100
Pfic	Petfic_v00_mik.OX345651.1G562.1	cellular organisms	1	100
Pfic	Petfic_v00_mik.OX345651.1G57.1	cellular organisms	1	100
Pfic	Petfic_v00_mik.OX345651.1G603.1	cellular organisms	1	100
Pfic	Petfic_v00_mik.OX345651.1G604.1	cellular organisms	1	100
Pfic	Petfic_v00_mik.OX345651.1G61.1	cellular organisms	1	75
Pfic	Petfic_v00_mik.OX345651.1G83.1	cellular organisms	1	87
Pfic	Petfic_v00_mik.OX345651.1G97.2	cellular organisms	1	75
Pfic	Petfic_v00_mik.OX345652.1G155.1	cellular organisms	1	100
Pfic	Petfic_v00_mik.OX345652.1G188.1	cellular organisms	1	75
Pfic	Petfic_v00_mik.OX345652.1G190.1	cellular organisms	1	75
Pfic	Petfic_v00_mik.OX345652.1G193.1	cellular organisms	1	75
Pfic	Petfic_v00_mik.OX345652.1G207.1	cellular organisms	1	100
Pfic	Petfic_v00_mik.OX345652.1G211.1	cellular organisms	1	100
Pfic	Petfic_v00_mik.OX345652.1G226.1	cellular organisms	1	100
Pfic	Petfic_v00_mik.OX345652.1G320.1	cellular organisms	1	100
Pfic	Petfic_v00_mik.OX345652.1G392.1	cellular organisms	1	100
Pfic	Petfic_v00_mik.OX345652.1G414.1	cellular organisms	1	75
Pfic	Petfic_v00_mik.OX345652.1G479.1	cellular organisms	1	100
Pfic	Petfic_v00_mik.OX345652.1G589.1	cellular organisms	1	100
Pfic	Petfic_v00_mik.OX345652.1G607.1	cellular organisms	1	100
Pfic	Petfic_v00_mik.OX345652.1G646.2	cellular organisms	1	100
Pfic	Petfic_v00_mik.OX345652.1G675.1	cellular organisms	1	100
Pfic	Petfic_v00_mik.OX345652.1G75.2	cellular organisms	1	87
Pfic	Petfic_v00_mik.OX345653.1G215.1	cellular organisms	1	100
Pfic	Petfic_v00_mik.OX345653.1G240.1	cellular organisms	1	100
Pfic	Petfic_v00_mik.OX345653.1G279.2	cellular organisms	1	100
Pfic	Petfic_v00_mik.OX345653.1G482.1	cellular organisms	1	100
Pfic	Petfic_v00_mik.OX345653.1G528.1	cellular organisms	1	100
Pfic	Petfic_v00_mik.OX345653.1G547.1	cellular organisms	1	100
Pfic	Petfic_v00_mik.OX345653.1G584.1	cellular organisms	1	87
Pfic	Petfic_v00_mik.OX345653.1G588.1	cellular organisms	1	100
Pfic	Petfic_v00_mik.OX345653.1G63.1	cellular organisms	1	100
Pfic	Petfic_v00_mik.OX345653.1G78.1	cellular organisms	1	100
Pven	PHAVENT1A000339.t1	cellular organisms	1	100
Pven	PHAVENT1A000365.t2	cellular organisms	1	62
Pven	PHAVENT1A000471.t1	cellular organisms	1	100
Pven	PHAVENT1A000477.t1	cellular organisms	1	100
Pven	PHAVENT1A000525.t1	cellular organisms	1	100
Pven	PHAVENT1A000764.t2	cellular organisms	1	100
Pven	PHAVENT1A000893.t1	cellular organisms	1	100
Pven	PHAVENT1A000900.t1	cellular organisms	1	87
Pven	PHAVENT1A001142.t2	cellular organisms	1	100
Pven	PHAVENT1A001233.t2	cellular organisms	1	100
Pven	PHAVENT1A001258.t1	cellular organisms	1	87
Pven	PHAVENT1A001822.t1	cellular organisms	1	100
Pven	PHAVENT1A002246.t1	cellular organisms	1	100
Pven	PHAVENT1A002551.t1	cellular organisms	1	100
Pven	PHAVENT1A002682.t1	cellular organisms	1	87
Pven	PHAVENT1A003253.t1	cellular organisms	1	87
Pven	PHAVENT1A004118.t1	cellular organisms	1	75
Pven	PHAVENT1A004204.t2	cellular organisms	1	87
Pven	PHAVENT1A005048.t2	cellular organisms	1	100
Pven	PHAVENT1A005138.t1	cellular organisms	1	100
Pven	PHAVENT1A005180.t1	cellular organisms	1	100
Pven	PHAVENT1A005640.t1	cellular organisms	1	62
Pven	PHAVENT1A005909.t1	cellular organisms	1	100
Pven	PHAVENT1A005911.t2	cellular organisms	1	100
Pven	PHAVENT1A006171.t1	cellular organisms	1	100
Pven	PHAVENT1A006199.t1	cellular organisms	1	100
Pven	PHAVENT1A006231.t1	cellular organisms	1	100
Pven	PHAVENT1A006330.t2	cellular organisms	1	100
Pven	PHAVENT1A006822.t1	cellular organisms	1	75
Pven	PHAVENT1A007219.t1	cellular organisms	1	100
Pven	PHAVENT1A007293.t1	cellular organisms	1	100
Pven	PHAVENT1A007639.t1	cellular organisms	1	100
Pven	PHAVENT1A007693.t1	cellular organisms	1	100
Pven	PHAVENT1A007783.t1	cellular organisms	1	100
Pven	PHAVENT1A008079.t1	cellular organisms	1	100
Pven	PHAVENT1A008167.t1	cellular organisms	1	100
Pven	PHAVENT1A008369.t1	cellular organisms	1	100
Pven	PHAVENT1A008379.t1	cellular organisms	1	87
Pven	PHAVENT1A008419.t3	cellular organisms	1	37
Pven	PHAVENT1A008546.t1	cellular organisms	1	100
Pven	PHAVENT1A008835.t1	cellular organisms	1	100
Pven	PHAVENT1A008965.t1	cellular organisms	1	100
Pven	PHAVENT1A009319.t1	cellular organisms	1	100
Pven	PHAVENT1A009339.t1	cellular organisms	1	100
Pven	PHAVENT1A009557.t1	cellular organisms	1	37
Pven	PHAVENT1A010168.t1	cellular organisms	1	100
Pven	PHAVENT1A010232.t1	cellular organisms	1	75
Pven	PHAVENT1A010308.t3	cellular organisms	1	100
Pven	PHAVENT1A010323.t1	cellular organisms	1	100
Pven	PHAVENT1A010453.t3	cellular organisms	1	100
Pven	PHAVENT1A010670.t1	cellular organisms	1	100
Pven	PHAVENT1A010789.t1	cellular organisms	1	100
Pven	PHAVENT1A011423.t1	cellular organisms	1	87
Pven	PHAVENT1A011455.t1	cellular organisms	1	100
Pven	PHAVENT1A011597.t1	cellular organisms	1	100
Pven	PHAVENT1A012104.t1	cellular organisms	1	100
Pven	PHAVENT1A012106.t2	cellular organisms	1	87
Pven	PHAVENT1A012120.t1	cellular organisms	1	100
Pven	PHAVENT1A012306.t1	cellular organisms	1	100
Pven	PHAVENT1A012474.t1	cellular organisms	1	100
Pven	PHAVENT1A012679.t1	cellular organisms	1	100
Pven	PHAVENT1A012747.t1	cellular organisms	1	100
Pven	PHAVENT1A012927.t1	cellular organisms	1	100
Pven	PHAVENT1A012944.t1	cellular organisms	1	87
Pven	PHAVENT1A013520.t1	cellular organisms	1	100
Pven	PHAVENT1A013581.t1	cellular organisms	1	100
Pven	PHAVENT1A013881.t1	cellular organisms	1	87
Pven	PHAVENT1A014001.t1	cellular organisms	1	87
Pven	PHAVENT1A014004.t1	cellular organisms	1	87
Pven	PHAVENT1A014183.t1	cellular organisms	1	100
Pven	PHAVENT1A014615.t1	cellular organisms	1	100
Pven	PHAVENT1A014934.t1	cellular organisms	1	100
Pven	PHAVENT1A014977.t1	cellular organisms	1	100
Pven	PHAVENT1A015057.t1	cellular organisms	1	62
Pven	PHAVENT1A015271.t1	cellular organisms	1	100
Pven	PHAVENT1A015325.t1	cellular organisms	1	100
Pven	PHAVENT1A015417.t1	cellular organisms	1	75
Pven	PHAVENT1A015608.t1	cellular organisms	1	100
Pven	PHAVENT1A015715.t1	cellular organisms	1	100
Pven	PHAVENT1A015908.t2	cellular organisms	1	100
Pven	PHAVENT1A016182.t1	cellular organisms	1	87
Pven	PHAVENT1A016449.t1	cellular organisms	1	87
Pven	PHAVENT1A016464.t1	cellular organisms	1	100
Pven	PHAVENT1A016486.t1	cellular organisms	1	100
Pven	PHAVENT1A017139.t1	cellular organisms	1	100
Pven	PHAVENT1A017265.t1	cellular organisms	1	87
Pven	PHAVENT1A017395.t1	cellular organisms	1	100
Pven	PHAVENT1A017744.t2	cellular organisms	1	100
Pven	PHAVENT1A017831.t1	cellular organisms	1	100
Pven	PHAVENT1A017905.t2	cellular organisms	1	100
Pven	PHAVENT1A018174.t1	cellular organisms	1	100
Pven	PHAVENT1A018899.t1	cellular organisms	1	100
Pven	PHAVENT1A019064.t1	cellular organisms	1	100
Pven	PHAVENT1A019077.t1	cellular organisms	1	87
Pven	PHAVENT1A019130.t2	cellular organisms	1	100
Pven	PHAVENT1A019254.t1	cellular organisms	1	87
Pven	PHAVENT1A019359.t1	cellular organisms	1	100
Pven	PHAVENT1A019392.t1	cellular organisms	1	87
Pven	PHAVENT1A019415.t2	cellular organisms	1	87
Pven	PHAVENT1A019530.t1	cellular organisms	1	100
Pven	PHAVENT1A019909.t1	cellular organisms	1	100
Pven	PHAVENT1A019923.t1	cellular organisms	1	100
Pven	PHAVENT1A020020.t1	cellular organisms	1	100
Pven	PHAVENT1A020054.t1	cellular organisms	1	100
Pven	PHAVENT1A020352.t1	cellular organisms	1	87
Pven	PHAVENT1A020367.t1	cellular organisms	1	100
Pven	PHAVENT1A020404.t1	cellular organisms	1	100
Pven	PHAVENT1A020531.t1	cellular organisms	1	100
Pven	PHAVENT1A020566.t1	cellular organisms	1	100
Pven	PHAVENT1A020651.t1	cellular organisms	1	100
Pven	PHAVENT1A020979.t1	cellular organisms	1	100
Pven	PHAVENT1A021014.t1	cellular organisms	1	100
Pven	PHAVENT1A021140.t1	cellular organisms	1	75
Pven	PHAVENT1A021149.t2	cellular organisms	1	100
Pven	PHAVENT1A021273.t1	cellular organisms	1	100
Pven	PHAVENT1A021290.t4	cellular organisms	1	87
Pven	PHAVENT1A021461.t1	cellular organisms	1	37
Pven	PHAVENT1A021467.t1	cellular organisms	1	87
Pven	PHAVENT1A021498.t1	cellular organisms	1	87
Pven	PHAVENT1A021659.t1	cellular organisms	1	100
Pven	PHAVENT1A021988.t1	cellular organisms	1	100
Pven	PHAVENT1A022031.t1	cellular organisms	1	100
Pven	PHAVENT1A022392.t1	cellular organisms	1	100
Pven	PHAVENT1A022801.t1	cellular organisms	1	100
Pven	PHAVENT1A022840.t1	cellular organisms	1	87
Pven	PHAVENT1A022904.t1	cellular organisms	1	100
Pven	PHAVENT1A023012.t1	cellular organisms	1	87
Pven	PHAVENT1A023066.t2	cellular organisms	1	100
Pven	PHAVENT1A023286.t1	cellular organisms	1	100
Pven	PHAVENT1A023494.t1	cellular organisms	1	100
Pven	PHAVENT1A023530.t1	cellular organisms	1	87
Pven	PHAVENT1A023582.t1	cellular organisms	1	87
Cren	Choren_v00_mik.OX359196.1G1190.1	Chondrillida	7	100
Cren	Choren_v00_mik.OX359196.1G145.1	Chondrillida	7	100
Cren	Choren_v00_mik.OX359189.1G1065.1	Chondrosia reniformis	8	100
Cren	Choren_v00_mik.OX359189.1G1209.1	Chondrosia reniformis	8	100
Cren	Choren_v00_mik.OX359189.1G1379.1	Chondrosia reniformis	8	100
Cren	Choren_v00_mik.OX359189.1G1487.2	Chondrosia reniformis	8	100
Cren	Choren_v00_mik.OX359189.1G1490.1	Chondrosia reniformis	8	100
Cren	Choren_v00_mik.OX359189.1G1493.1	Chondrosia reniformis	8	100
Cren	Choren_v00_mik.OX359189.1G1494.1	Chondrosia reniformis	8	100
Cren	Choren_v00_mik.OX359190.1G437.1	Chondrosia reniformis	8	100
Cren	Choren_v00_mik.OX359190.1G519.1	Chondrosia reniformis	8	100
Cren	Choren_v00_mik.OX359190.1G922.1	Chondrosia reniformis	8	100
Cren	Choren_v00_mik.OX359191.1G102.1	Chondrosia reniformis	8	100
Cren	Choren_v00_mik.OX359191.1G120.1	Chondrosia reniformis	8	100
Cren	Choren_v00_mik.OX359191.1G185.1	Chondrosia reniformis	8	100
Cren	Choren_v00_mik.OX359191.1G455.1	Chondrosia reniformis	8	100
Cren	Choren_v00_mik.OX359191.1G619.1	Chondrosia reniformis	8	100
Cren	Choren_v00_mik.OX359192.1G187.1	Chondrosia reniformis	8	100
Cren	Choren_v00_mik.OX359192.1G235.1	Chondrosia reniformis	8	100
Cren	Choren_v00_mik.OX359192.1G416.1	Chondrosia reniformis	8	100
Cren	Choren_v00_mik.OX359193.1G1326.1	Chondrosia reniformis	8	100
Cren	Choren_v00_mik.OX359193.1G1349.1	Chondrosia reniformis	8	100
Cren	Choren_v00_mik.OX359194.1G273.1	Chondrosia reniformis	8	100
Cren	Choren_v00_mik.OX359194.1G410.1	Chondrosia reniformis	8	100
Cren	Choren_v00_mik.OX359194.1G777.1	Chondrosia reniformis	8	100
Cren	Choren_v00_mik.OX359195.1G773.1	Chondrosia reniformis	8	100
Cren	Choren_v00_mik.OX359196.1G1104.1	Chondrosia reniformis	8	100
Cren	Choren_v00_mik.OX359197.1G511.1	Chondrosia reniformis	8	100
Cren	Choren_v00_mik.OX359198.1G165.1	Chondrosia reniformis	8	100
Cren	Choren_v00_mik.OX359198.1G423.1	Chondrosia reniformis	8	100
Cren	Choren_v00_mik.OX359198.1G486.1	Chondrosia reniformis	8	100
Cren	Choren_v00_mik.OX359198.1G544.1	Chondrosia reniformis	8	100
Cren	Choren_v00_mik.OX359198.1G774.1	Chondrosia reniformis	8	100
Cren	Choren_v00_mik.OX359199.1G244.1	Chondrosia reniformis	8	100
Cren	Choren_v00_mik.OX359199.1G323.2	Chondrosia reniformis	8	100
Cren	Choren_v00_mik.OX359199.1G387.1	Chondrosia reniformis	8	100
Cren	Choren_v00_mik.OX359199.1G400.1	Chondrosia reniformis	8	100
Cren	Choren_v00_mik.OX359199.1G630.1	Chondrosia reniformis	8	100
Cren	Choren_v00_mik.OX359200.1G138.1	Chondrosia reniformis	8	100
Cren	Choren_v00_mik.OX359200.1G487.1	Chondrosia reniformis	8	100
Cren	Choren_v00_mik.OX359200.1G527.1	Chondrosia reniformis	8	100
Cren	Choren_v00_mik.OX359201.1G394.1	Chondrosia reniformis	8	100
Cren	Choren_v00_mik.OX359202.1G64.1	Chondrosia reniformis	8	100
Adam	Adami_g9556.t1	Demospongiae	6	100
Adam	Adami_g9941.t1	Demospongiae	6	100
Cren	Choren_v00_mik.OX359189.1G757.1	Demospongiae	6	50
Cren	Choren_v00_mik.OX359190.1G304.1	Demospongiae	6	50
Cren	Choren_v00_mik.OX359191.1G1211.1	Demospongiae	6	50
Cren	Choren_v00_mik.OX359192.1G167.1	Demospongiae	6	50
Cren	Choren_v00_mik.OX359192.1G620.1	Demospongiae	6	50
Cren	Choren_v00_mik.OX359193.1G600.1	Demospongiae	6	50
Cren	Choren_v00_mik.OX359193.1G886.1	Demospongiae	6	100
Cren	Choren_v00_mik.OX359194.1G538.1	Demospongiae	6	50
Cren	Choren_v00_mik.OX359198.1G291.1	Demospongiae	6	100
Cren	Choren_v00_mik.OX359199.1G335.1	Demospongiae	6	100
Cren	Choren_v00_mik.OX359199.1G358.1	Demospongiae	6	50
Cren	Choren_v00_mik.OX359200.1G113.2	Demospongiae	6	50
Pfic	Petfic_v00_mik.OX345636.1G1103.2	Demospongiae	6	100
Pfic	Petfic_v00_mik.OX345636.1G1117.1	Demospongiae	6	66
Pfic	Petfic_v00_mik.OX345636.1G3207.1	Demospongiae	6	100
Pfic	Petfic_v00_mik.OX345636.1G3564.1	Demospongiae	6	100
Pfic	Petfic_v00_mik.OX345636.1G4230.1	Demospongiae	6	100
Pfic	Petfic_v00_mik.OX345636.1G5033.1	Demospongiae	6	100
Pfic	Petfic_v00_mik.OX345636.1G5102.1	Demospongiae	6	66
Pfic	Petfic_v00_mik.OX345636.1G5362.1	Demospongiae	6	33
Pfic	Petfic_v00_mik.OX345636.1G6485.1	Demospongiae	6	66
Pfic	Petfic_v00_mik.OX345637.1G646.1	Demospongiae	6	100
Pfic	Petfic_v00_mik.OX345637.1G778.1	Demospongiae	6	66
Pfic	Petfic_v00_mik.OX345639.1G360.1	Demospongiae	6	100
Pfic	Petfic_v00_mik.OX345642.1G984.1	Demospongiae	6	100
Pfic	Petfic_v00_mik.OX345643.1G135.1	Demospongiae	6	100
Pfic	Petfic_v00_mik.OX345643.1G248.1	Demospongiae	6	100
Pfic	Petfic_v00_mik.OX345643.1G252.1	Demospongiae	6	100
Pfic	Petfic_v00_mik.OX345643.1G308.4	Demospongiae	6	100
Pfic	Petfic_v00_mik.OX345643.1G317.1	Demospongiae	6	100
Pfic	Petfic_v00_mik.OX345643.1G323.1	Demospongiae	6	100
Pfic	Petfic_v00_mik.OX345643.1G522.1	Demospongiae	6	100
Pfic	Petfic_v00_mik.OX345643.1G834.1	Demospongiae	6	100
Pfic	Petfic_v00_mik.OX345645.1G675.1	Demospongiae	6	100
Pfic	Petfic_v00_mik.OX345652.1G652.1	Demospongiae	6	100
Pven	PHAVENT1A003890.t1	Demospongiae	6	100
Pven	PHAVENT1A010311.t1	Demospongiae	6	100
Pven	PHAVENT1A011915.t1	Demospongiae	6	100
Pven	PHAVENT1A013740.t1	Demospongiae	6	100
Pven	PHAVENT1A016197.t1	Demospongiae	6	100
Pven	PHAVENT1A020170.t1	Demospongiae	6	100
Adam	Adami_g11779.t1	Eukaryota	2	85
Adam	Adami_g13299.t1	Eukaryota	2	100
Adam	Adami_g13407.t1	Eukaryota	2	100
Adam	Adami_g13727.t1	Eukaryota	2	100
Adam	Adami_g13738.t1	Eukaryota	2	100
Adam	Adami_g14187.t1	Eukaryota	2	100
Adam	Adami_g1440.t1	Eukaryota	2	71
Adam	Adami_g15898.t1	Eukaryota	2	85
Adam	Adami_g15974.t1	Eukaryota	2	100
Adam	Adami_g16191.t1	Eukaryota	2	85
Adam	Adami_g2989.t1	Eukaryota	2	100
Adam	Adami_g3.t1	Eukaryota	2	85
Adam	Adami_g40.t1	Eukaryota	2	100
Adam	Adami_g5846.t1	Eukaryota	2	100
Adam	Adami_g6354.t1	Eukaryota	2	100
Adam	Adami_g6842.t1	Eukaryota	2	100
Adam	Adami_g6945.t2	Eukaryota	2	100
Adam	Adami_g712.t1	Eukaryota	2	100
Adam	Adami_g749.t2	Eukaryota	2	85
Adam	Adami_g9562.t1	Eukaryota	2	100
Cren	Choren_v00_mik.OX359189.1G191.1	Eukaryota	2	83
Cren	Choren_v00_mik.OX359190.1G178.1	Eukaryota	2	100
Cren	Choren_v00_mik.OX359190.1G469.1	Eukaryota	2	50
Cren	Choren_v00_mik.OX359190.1G982.1	Eukaryota	2	83
Cren	Choren_v00_mik.OX359192.1G1110.1	Eukaryota	2	83
Cren	Choren_v00_mik.OX359192.1G1173.1	Eukaryota	2	83
Cren	Choren_v00_mik.OX359192.1G180.2	Eukaryota	2	83
Cren	Choren_v00_mik.OX359192.1G593.1	Eukaryota	2	66
Cren	Choren_v00_mik.OX359192.1G784.1	Eukaryota	2	83
Cren	Choren_v00_mik.OX359192.1G974.1	Eukaryota	2	83
Cren	Choren_v00_mik.OX359192.1G988.1	Eukaryota	2	83
Cren	Choren_v00_mik.OX359193.1G1152.1	Eukaryota	2	83
Cren	Choren_v00_mik.OX359193.1G1301.1	Eukaryota	2	66
Cren	Choren_v00_mik.OX359193.1G1313.1	Eukaryota	2	83
Cren	Choren_v00_mik.OX359193.1G1422.1	Eukaryota	2	83
Cren	Choren_v00_mik.OX359194.1G1000.1	Eukaryota	2	83
Cren	Choren_v00_mik.OX359194.1G481.1	Eukaryota	2	66
Cren	Choren_v00_mik.OX359194.1G867.1	Eukaryota	2	83
Cren	Choren_v00_mik.OX359194.1G990.1	Eukaryota	2	83
Cren	Choren_v00_mik.OX359195.1G756.1	Eukaryota	2	83
Cren	Choren_v00_mik.OX359196.1G656.1	Eukaryota	2	66
Cren	Choren_v00_mik.OX359197.1G385.1	Eukaryota	2	83
Cren	Choren_v00_mik.OX359197.1G658.1	Eukaryota	2	66
Cren	Choren_v00_mik.OX359197.1G698.1	Eukaryota	2	66
Cren	Choren_v00_mik.OX359199.1G1083.1	Eukaryota	2	83
Cren	Choren_v00_mik.OX359199.1G324.1	Eukaryota	2	66
Cren	Choren_v00_mik.OX359199.1G375.1	Eukaryota	2	83
Cren	Choren_v00_mik.OX359199.1G403.1	Eukaryota	2	83
Cren	Choren_v00_mik.OX359200.1G134.1	Eukaryota	2	83
Cren	Choren_v00_mik.OX359200.1G366.1	Eukaryota	2	83
Cren	Choren_v00_mik.OX359201.1G315.1	Eukaryota	2	83
Cren	Choren_v00_mik.OX359201.1G339.1	Eukaryota	2	83
Cren	Choren_v00_mik.OX359201.1G345.1	Eukaryota	2	83
Cren	Choren_v00_mik.OX359202.1G1010.1	Eukaryota	2	83
Hpan	Hpan_g1076.t1	Eukaryota	2	85
Hpan	Hpan_g14975.t1	Eukaryota	2	85
Hpan	Hpan_g15660.t1	Eukaryota	2	85
Hpan	Hpan_g3960.t1	Eukaryota	2	85
Hpan	Hpan_g7111.t1	Eukaryota	2	85
Hpan	Hpan_g8370.t1	Eukaryota	2	85
Hpan	Hpan_g9404.t1	Eukaryota	2	85
Olob	Osclob_v00_mik.OX382150.1G1614.1	Eukaryota	2	100
Olob	Osclob_v00_mik.OX382150.1G1740.1	Eukaryota	2	80
Olob	Osclob_v00_mik.OX382150.1G240.2	Eukaryota	2	100
Olob	Osclob_v00_mik.OX382150.1G312.1	Eukaryota	2	80
Olob	Osclob_v00_mik.OX382150.1G53.1	Eukaryota	2	100
Olob	Osclob_v00_mik.OX382150.1G609.1	Eukaryota	2	100
Olob	Osclob_v00_mik.OX382150.1G872.1	Eukaryota	2	100
Olob	Osclob_v00_mik.OX382150.1G956.1	Eukaryota	2	100
Olob	Osclob_v00_mik.OX382152.1G293.1	Eukaryota	2	60
Olob	Osclob_v00_mik.OX382152.1G845.1	Eukaryota	2	100
Olob	Osclob_v00_mik.OX382152.1G915.1	Eukaryota	2	100
Olob	Osclob_v00_mik.OX382153.1G308.1	Eukaryota	2	100
Olob	Osclob_v00_mik.OX382153.1G834.1	Eukaryota	2	100
Olob	Osclob_v00_mik.OX382154.1G202.1	Eukaryota	2	100
Olob	Osclob_v00_mik.OX382154.1G554.1	Eukaryota	2	80
Olob	Osclob_v00_mik.OX382154.1G678.1	Eukaryota	2	100
Olob	Osclob_v00_mik.OX382155.1G127.2	Eukaryota	2	100
Olob	Osclob_v00_mik.OX382155.1G191.1	Eukaryota	2	80
Olob	Osclob_v00_mik.OX382156.1G356.1	Eukaryota	2	80
Olob	Osclob_v00_mik.OX382156.1G431.1	Eukaryota	2	100
Olob	Osclob_v00_mik.OX382156.1G70.1	Eukaryota	2	100
Olob	Osclob_v00_mik.OX382157.1G167.1	Eukaryota	2	80
Olob	Osclob_v00_mik.OX382157.1G562.1	Eukaryota	2	100
Olob	Osclob_v00_mik.OX382158.1G335.1	Eukaryota	2	80
Olob	Osclob_v00_mik.OX382158.1G378.1	Eukaryota	2	80
Olob	Osclob_v00_mik.OX382158.1G627.1	Eukaryota	2	100
Olob	Osclob_v00_mik.OX382158.1G752.1	Eukaryota	2	80
Olob	Osclob_v00_mik.OX382158.1G784.1	Eukaryota	2	100
Olob	Osclob_v00_mik.OX382159.1G173.1	Eukaryota	2	100
Olob	Osclob_v00_mik.OX382159.1G57.1	Eukaryota	2	100
Olob	Osclob_v00_mik.OX382160.1G370.1	Eukaryota	2	80
Olob	Osclob_v00_mik.OX382161.1G438.1	Eukaryota	2	80
Olob	Osclob_v00_mik.OX382161.1G540.1	Eukaryota	2	80
Olob	Osclob_v00_mik.OX382161.1G600.1	Eukaryota	2	100
Olob	Osclob_v00_mik.OX382163.1G403.1	Eukaryota	2	100
Olob	Osclob_v00_mik.OX382163.1G404.1	Eukaryota	2	100
Olob	Osclob_v00_mik.OX382163.1G461.1	Eukaryota	2	100
Olob	Osclob_v00_mik.OX382163.1G489.1	Eukaryota	2	100
Olob	Osclob_v00_mik.OX382163.1G547.1	Eukaryota	2	100
Olob	Osclob_v00_mik.OX382164.1G137.1	Eukaryota	2	100
Olob	Osclob_v00_mik.OX382164.1G382.1	Eukaryota	2	60
Olob	Osclob_v00_mik.OX382164.1G520.1	Eukaryota	2	80
Olob	Osclob_v00_mik.OX382165.1G216.1	Eukaryota	2	100
Olob	Osclob_v00_mik.OX382165.1G97.1	Eukaryota	2	100
Olob	Osclob_v00_mik.OX382166.1G99.1	Eukaryota	2	100
Olob	Osclob_v00_mik.OX382167.1G179.1	Eukaryota	2	100
Olob	Osclob_v00_mik.OX382167.1G45.1	Eukaryota	2	80
Olob	Osclob_v00_mik.OX382167.1G527.1	Eukaryota	2	60
Olob	Osclob_v00_mik.OX382168.1G452.1	Eukaryota	2	100
Pfic	Petfic_v00_mik.OX345636.1G1091.1	Eukaryota	2	85
Pfic	Petfic_v00_mik.OX345636.1G1153.1	Eukaryota	2	100
Pfic	Petfic_v00_mik.OX345636.1G1249.1	Eukaryota	2	100
Pfic	Petfic_v00_mik.OX345636.1G1322.1	Eukaryota	2	100
Pfic	Petfic_v00_mik.OX345636.1G1430.1	Eukaryota	2	85
Pfic	Petfic_v00_mik.OX345636.1G1547.2	Eukaryota	2	100
Pfic	Petfic_v00_mik.OX345636.1G1582.1	Eukaryota	2	100
Pfic	Petfic_v00_mik.OX345636.1G1679.1	Eukaryota	2	100
Pfic	Petfic_v00_mik.OX345636.1G288.1	Eukaryota	2	85
Pfic	Petfic_v00_mik.OX345636.1G3813.1	Eukaryota	2	100
Pfic	Petfic_v00_mik.OX345636.1G3815.1	Eukaryota	2	100
Pfic	Petfic_v00_mik.OX345636.1G3972.1	Eukaryota	2	100
Pfic	Petfic_v00_mik.OX345636.1G4379.1	Eukaryota	2	71
Pfic	Petfic_v00_mik.OX345636.1G4401.1	Eukaryota	2	85
Pfic	Petfic_v00_mik.OX345636.1G4466.1	Eukaryota	2	100
Pfic	Petfic_v00_mik.OX345636.1G4485.1	Eukaryota	2	100
Pfic	Petfic_v00_mik.OX345636.1G4562.1	Eukaryota	2	100
Pfic	Petfic_v00_mik.OX345636.1G4653.1	Eukaryota	2	85
Pfic	Petfic_v00_mik.OX345636.1G5110.1	Eukaryota	2	71
Pfic	Petfic_v00_mik.OX345636.1G5873.1	Eukaryota	2	57
Pfic	Petfic_v00_mik.OX345636.1G623.1	Eukaryota	2	71
Pfic	Petfic_v00_mik.OX345636.1G6257.1	Eukaryota	2	85
Pfic	Petfic_v00_mik.OX345636.1G6532.1	Eukaryota	2	85
Pfic	Petfic_v00_mik.OX345636.1G6548.1	Eukaryota	2	71
Pfic	Petfic_v00_mik.OX345636.1G6700.1	Eukaryota	2	71
Pfic	Petfic_v00_mik.OX345636.1G6952.1	Eukaryota	2	85
Pfic	Petfic_v00_mik.OX345637.1G1459.1	Eukaryota	2	100
Pfic	Petfic_v00_mik.OX345637.1G172.1	Eukaryota	2	100
Pfic	Petfic_v00_mik.OX345637.1G1867.1	Eukaryota	2	85
Pfic	Petfic_v00_mik.OX345637.1G32.1	Eukaryota	2	100
Pfic	Petfic_v00_mik.OX345637.1G34.1	Eukaryota	2	85
Pfic	Petfic_v00_mik.OX345637.1G382.1	Eukaryota	2	100
Pfic	Petfic_v00_mik.OX345637.1G530.1	Eukaryota	2	100
Pfic	Petfic_v00_mik.OX345637.1G628.1	Eukaryota	2	100
Pfic	Petfic_v00_mik.OX345637.1G784.1	Eukaryota	2	100
Pfic	Petfic_v00_mik.OX345637.1G855.1	Eukaryota	2	100
Pfic	Petfic_v00_mik.OX345637.1G944.1	Eukaryota	2	100
Pfic	Petfic_v00_mik.OX345638.1G1009.1	Eukaryota	2	100
Pfic	Petfic_v00_mik.OX345638.1G327.1	Eukaryota	2	100
Pfic	Petfic_v00_mik.OX345638.1G333.1	Eukaryota	2	100
Pfic	Petfic_v00_mik.OX345638.1G592.1	Eukaryota	2	85
Pfic	Petfic_v00_mik.OX345638.1G701.1	Eukaryota	2	85
Pfic	Petfic_v00_mik.OX345638.1G783.1	Eukaryota	2	71
Pfic	Petfic_v00_mik.OX345638.1G895.1	Eukaryota	2	71
Pfic	Petfic_v00_mik.OX345638.1G902.1	Eukaryota	2	71
Pfic	Petfic_v00_mik.OX345638.1G916.1	Eukaryota	2	71
Pfic	Petfic_v00_mik.OX345638.1G923.1	Eukaryota	2	71
Pfic	Petfic_v00_mik.OX345638.1G942.1	Eukaryota	2	85
Pfic	Petfic_v00_mik.OX345639.1G1114.1	Eukaryota	2	85
Pfic	Petfic_v00_mik.OX345639.1G1233.1	Eukaryota	2	85
Pfic	Petfic_v00_mik.OX345639.1G1377.1	Eukaryota	2	100
Pfic	Petfic_v00_mik.OX345639.1G138.1	Eukaryota	2	100
Pfic	Petfic_v00_mik.OX345639.1G1390.1	Eukaryota	2	100
Pfic	Petfic_v00_mik.OX345639.1G1455.1	Eukaryota	2	100
Pfic	Petfic_v00_mik.OX345639.1G1533.1	Eukaryota	2	100
Pfic	Petfic_v00_mik.OX345639.1G228.1	Eukaryota	2	100
Pfic	Petfic_v00_mik.OX345639.1G273.1	Eukaryota	2	100
Pfic	Petfic_v00_mik.OX345639.1G366.1	Eukaryota	2	100
Pfic	Petfic_v00_mik.OX345639.1G785.1	Eukaryota	2	100
Pfic	Petfic_v00_mik.OX345639.1G965.1	Eukaryota	2	100
Pfic	Petfic_v00_mik.OX345640.1G128.1	Eukaryota	2	85
Pfic	Petfic_v00_mik.OX345640.1G201.1	Eukaryota	2	71
Pfic	Petfic_v00_mik.OX345640.1G205.1	Eukaryota	2	100
Pfic	Petfic_v00_mik.OX345640.1G433.1	Eukaryota	2	100
[truncated: 713 more rows]

## Sheet: D_SexGs_across_strata
Stratum	Number of sex OGs	Number of sexual genes
Cell Organism	1064	1709
Eukaryota	218	253
Opisthokonta	47	58
Metazoa	180	233
Porifera	14	17
Demospongiae	37	43
Heteroscleromorpha	86	128
Axinellidae	4	4
Axinella damicornis	4	8
Chondrosia reniformis	30	41
Halichondria panicea	1	1
Oscarella lobularis	18	25
Petrosia ficiformis	49	73
Phakellia ventilabrum	14	25

## Sheet: D_Semantic_categories
Category	Associated with sexual function of:	Reference
DNA Repair & Recombination	Meiosis	Chintapalli, S.V., Bhardwaj, G., Babu, J. et al. Reevaluation of the evolutionary events within recA/RAD51 phylogeny. BMC Genomics 14, 240 (2013). https://doi.org/10.1186/1471-2164-14-240
Cell-Cycle Control	Gametogenesis	Xu, E. Y., et al. (2001). A gene family required for human germ cell development evolved from an ancient meiotic gene conserved in metazoans. PNAS, 98(13), 7414-7419
Membrane Fusion & Adhesion	Fertilization	Fedry, J., et al. (2017). The ancient gamete fusogen HAP2 is a eukaryotic class II fusion protein. Nature, 546(7659), 654-658.
Transcriptional Regulation	Sex Determination	Matson, C. K., & Zarkower, D. (2012). Sex and the singular DM domain: insights into sexual regulation, evolution and plasticity. Nature Reviews Genetics, 13(3), 163-174.
Cytoskeleton Dynamics	Gamete Motility	Carvalho-Santos, Z., et al. (2011). Evolutionary conservation of centriole assembly mechanisms. Science, 334(6063), 450-453.
Stress Response	Mate Recognition	Bererhi, B., Duchesne, P., Schwartz, T. S., Ujvari, B., Wapstra, E., & Olsson, M. (2023). Effect of MHC and inbreeding on disassortative reproduction: A data revisit, extension and inclusion of fertilization in sand lizards. Ecology and Evolution, 13, e9934. https://doi.org/10.1002/ece3.9934
Apoptosis	Germline Quality Control	Tilly, J. L. (2001). Commuting the death sentence: How oocytes strive to survive. Nature Reviews Molecular Cell Biology, 2(11), 838-848.

## Sheet: E_Enrichment_cel_euk_met
Stratum	Enrichment FDR	nGenes	Pathway Genes	Fold Enrichment	Pathway	Enritch	Genes	syntenic_gene	Category
Metazoa	0.100301	2	106	9.18547	GO:0036473	cell death in response to oxidative stress	FZD1,LRRK2	-	Apoptosis
Metazoa	0.150208	1	29	16.7872	GO:0036474	cell death in response to hydrogen peroxide	LRRK2	-	Apoptosis
Cell_org	0.118194	3	29	6.312	GO:0036474	cell death in response to hydrogen peroxide	FOXP1,MET,LRRK2	-	Apoptosis
Metazoa	0.167893	1	37	13.1576	GO:1902235	regulation of endoplasmic reticulum stress-induced intrinsic apoptotic signaling pathway	LRRK2	-	Apoptosis
Metazoa	0.140481	1	24	20.2846	GO:1902236	negative regulation of endoplasmic reticulum stress-induced intrinsic apoptotic signaling pathway	LRRK2	-	Apoptosis
Cell_org	0.11876	10	263	2.32	GO:0051402	neuron apoptotic process	FAS,CDK5,NLRP1,HDAC4,MSH2,ZPR1,PIGT,PCSK9,TRIM2,NTRK2	PIGT	Apoptosis
Cell_org	0.03021	52	2065	1.53648	GO:0006915	apoptotic process	FAS,MADD,BIRC6,MIEN1,EGFR,CDK5,IFI27,DAPK3,ERN1,KAT5,BCL3,NLRP1,FOXP1,TRAF2,HIP1,SGPL1,GAS6,CUL1,HDAC4,FGFR3,TRAF4,TRAF5,G2E3,MSH2,RIPK2,ZPR1,HELLS,PIGT,PARP2,TRAF3,NTRK2,ITPR1,AIMP1,RAD21,ARF6,NGB,NOD2,ING2,PCSK9,PTEN,MITF,ADA,RYR2,WRN,LRP6,MCM2,SNW1,PLCG1,LRRK2,WNK3,TRIM2,ALK	PIGT	Apoptosis
Cell_org	0.0227176	58	2320	1.5254	GO:0008219	cell death	FAS,MADD,BIRC6,MIEN1,EGFR,CDK5,IFI27,DAPK3,ERN1,NLRP1,VPS4B,KAT5,BCL3,RIPK2,DCPS,FOXP1,TRAF2,HIP1,SGPL1,GAS6,LRRK2,CUL1,HDAC4,FGFR3,TRAF4,TRAF5,G2E3,MSH2,ZPR1,ADPRS,HELLS,PIGT,PARP2,TRAF3,NTRK2,ITPR1,AIMP1,RAD21,ARF6,NGB,NOD2,ING2,PCSK9,PTEN,MITF,ADA,RYR2,WRN,LRP6,MCM2,SNW1,PARP4,MET,PLCG1,WNK3,TRIM2,TBK1,ALK	PIGT	Apoptosis
Cell_org	0.0164068	55	2127	1.57775	GO:0012501	programmed cell death	FAS,MADD,BIRC6,MIEN1,EGFR,CDK5,IFI27,DAPK3,ERN1,NLRP1,KAT5,BCL3,DCPS,FOXP1,TRAF2,HIP1,SGPL1,GAS6,LRRK2,CUL1,HDAC4,FGFR3,TRAF4,TRAF5,G2E3,MSH2,RIPK2,ZPR1,ADPRS,HELLS,PIGT,PARP2,TRAF3,NTRK2,ITPR1,AIMP1,RAD21,ARF6,NGB,NOD2,ING2,PCSK9,PTEN,MITF,ADA,RYR2,WRN,LRP6,MCM2,SNW1,MET,PLCG1,WNK3,TRIM2,ALK	PIGT	Apoptosis
Cell_org	0.0922821	14	406	2.104	GO:0070997	neuron death	FAS,CDK5,NLRP1,HDAC4,MSH2,ZPR1,PIGT,PARP2,PCSK9,LRRK2,TRIM2,NTRK2,TBK1,TRAF2	PIGT	Apoptosis
Cell_org	3.62639e-07	89	2805	1.93598	GO:0009056	catabolic process	UBR2,CUL1,NEDD4,MOXD1,ULK2,MANBA,TRIM2,DCPS,TRIM3,NPRL2,KYNU,CDC20,IDE,WWP1,SARDH,IVD,HELZ2,HACL1,AGAP3,DHX34,DPYS,HERC4,UBC,CUL4B,SGPL1,LDHD,ULK1,LRRK2,ADA,TTC37,LTN1,TRIP4,PCCB,VPS4B,FURIN,ARNT,CNOT9,ABCA2,ECE1,EGFR,DDAH1,NELL1,ATG4B,PCSK9,PTEN,KAT5,TBK1,NSUN2,HDAC4,TRAF4,TRAF5,GGA1,ARSA,PLCB4,HERC1,RIPK2,CUL9,PLCG1,TRAF2,PLD2,MGAT1,NAAA,PXDNL,PLCL2,FTCD,VPS11,CDK5,NOD2,RAB8A,ALK,UBE2N,PLCD1,LR…	PCCB	Apoptosis
Cell_org	0.186312	5	104	2.93346	GO:0009062	fatty acid catabolic process	HACL1,PCCB,IVD,SCP2,NUDT8	PCCB	Apoptosis
Cell_org	0.0957845	13	368	2.15546	GO:0016042	lipid catabolic process	HACL1,SGPL1,PCCB,IVD,PLCB4,PLCG1,PLD2,NAAA,PLCL2,ALK,PLCD1,SCP2,NUDT8	PCCB	Apoptosis
Cell_org	0.0634146	11	259	2.59141	GO:0016054	organic acid catabolic process	KYNU,SARDH,IVD,HACL1,LDHD,PCCB,DDAH1,FTCD,SCP2,NUDT8,HYKK	PCCB	Apoptosis
Cell_org	2.92517e-06	77	2402	1.95597	GO:0044248	cellular catabolic process	UBR2,CUL1,NEDD4,MOXD1,ULK2,MANBA,TRIM2,DCPS,TRIM3,NPRL2,KYNU,CDC20,IDE,WWP1,SARDH,IVD,HELZ2,HACL1,AGAP3,DHX34,DPYS,HERC4,UBC,CUL4B,SGPL1,LDHD,ULK1,LRRK2,ADA,TTC37,LTN1,TRIP4,PCCB,VPS4B,FURIN,ARNT,CNOT9,ABCA2,ECE1,DDAH1,ATG4B,PCSK9,PTEN,KAT5,TBK1,NSUN2,TRAF4,TRAF5,ARSA,HERC1,RIPK2,CUL9,PLCG1,TRAF2,MGAT1,PXDNL,FTCD,VPS11,CDK5,NOD2,RAB8A,UBE2N,LRIG2,EHMT2,VPS16,ZPR1,ANXA7,TMTC3,UFC1,IFI27,SCP2,NUDT8…	PCCB	Apoptosis
Cell_org	0.0522355	15	403	2.27107	GO:0044282	small molecule catabolic process	KYNU,SARDH,IVD,HACL1,LDHD,ADA,PCCB,DDAH1,PTEN,MGAT1,FTCD,SCP2,NUDT8,FUT10,HYKK	PCCB	Apoptosis
Cell_org	0.0583582	11	255	2.63206	GO:0046395	carboxylic acid catabolic process	KYNU,SARDH,IVD,HACL1,LDHD,PCCB,DDAH1,FTCD,SCP2,NUDT8,HYKK	PCCB	Apoptosis
Cell_org	0.148023	6	126	2.90552	GO:0072329	monocarboxylic acid catabolic process	HACL1,LDHD,PCCB,IVD,SCP2,NUDT8	PCCB	Apoptosis
Cell_org	7.69151e-05	70	2312	1.84737	GO:1901575	organic substance catabolic process	UBR2,CUL1,NEDD4,MOXD1,MANBA,TRIM2,DCPS,TRIM3,KYNU,CDC20,IDE,WWP1,SARDH,IVD,HELZ2,HACL1,AGAP3,DHX34,DPYS,HERC4,UBC,CUL4B,SGPL1,LDHD,ADA,TTC37,LTN1,TRIP4,PCCB,FURIN,ARNT,CNOT9,ABCA2,ECE1,EGFR,DDAH1,NELL1,PCSK9,PTEN,NSUN2,HDAC4,TRAF4,TRAF5,GGA1,PLCB4,CUL9,PLCG1,TRAF2,PLD2,MGAT1,NAAA,PLCL2,FTCD,CDK5,ALK,UBE2N,PLCD1,LRRK2,LRIG2,RIC1,ZPR1,VPS4B,TMTC3,IFI27,KAT5,SCP2,NUDT8,FUT10,ERN1,HYKK	PCCB	Apoptosis
Cell_org	0.19865	36	1594	1.37803	GO:0042981	regulation of apoptotic process	FAS,MADD,BIRC6,MIEN1,EGFR,DAPK3,KAT5,BCL3,FOXP1,TRAF2,HIP1,GAS6,HDAC4,TRAF4,TRAF5,NLRP1,MSH2,RIPK2,ZPR1,HELLS,TRAF3,NTRK2,CDK5,NOD2,ING2,PCSK9,PTEN,MITF,ADA,WRN,LRP6,PLCG1,LRRK2,WNK3,TRIM2,ALK	KAT5	Apoptosis
Cell_org	0.19865	36	1594	1.37803	GO:0042981	regulation of apoptotic process	FAS,MADD,BIRC6,MIEN1,EGFR,DAPK3,KAT5,BCL3,FOXP1,TRAF2,HIP1,GAS6,HDAC4,TRAF4,TRAF5,NLRP1,MSH2,RIPK2,ZPR1,HELLS,TRAF3,NTRK2,CDK5,NOD2,ING2,PCSK9,PTEN,MITF,ADA,WRN,LRP6,PLCG1,LRRK2,WNK3,TRIM2,ALK	KAT5	Apoptosis
Cell_org	0.11498	39	1627	1.46258	GO:0043067	regulation of programmed cell death	FAS,MADD,BIRC6,MIEN1,EGFR,DAPK3,KAT5,BCL3,DCPS,FOXP1,TRAF2,HIP1,GAS6,LRRK2,HDAC4,TRAF4,TRAF5,NLRP1,MSH2,RIPK2,ZPR1,ADPRS,HELLS,TRAF3,NTRK2,CDK5,NOD2,ING2,PCSK9,PTEN,MITF,ADA,WRN,LRP6,MET,PLCG1,WNK3,TRIM2,ALK	KAT5	Apoptosis
Cell_org	0.0476232	3	17	10.7675	GO:0034349	glial cell apoptotic process	GAS6,TRAF2,CDK5	-	Apoptosis
Metazoa	0.168817	1	38	12.8113	GO:0042092	type 2 immune response	BCL3	-	Apoptosis
Metazoa	0.113959	4	563	3.45883	GO:0043065	positive regulation of apoptotic process	DAPK1,TGFB2,SAV1,CASP8	-	Apoptosis
Cell_org	0.0935559	7	138	3.09501	GO:0071887	leukocyte apoptotic process	FAS,FOXP1,GAS6,BCL3,NOD2,PTEN,ADA	-	Apoptosis
Metazoa	0.0615196	6	655	4.45951	GO:0097190	apoptotic signaling pathway	CASP8,TGFB2,WNT4,DAPK1,BCL3,LRRK2	-	Apoptosis
Cell_org	0.0822081	20	655	1.86308	GO:0097190	apoptotic signaling pathway	FAS,IFI27,ERN1,MADD,HIP1,SGPL1,MSH2,HELLS,PARP2,ITPR1,DAPK3,ING2,PTEN,FGFR3,BCL3,SNW1,BIRC6,TRAF2,LRRK2,CUL1	-	Apoptosis
Metazoa	0.150208	8	2065	1.88602	GO:0006915	apoptotic process	CASP8,DAPK1,BCL3,TGFB2,SAV1,WNT4,BRAT1,LRRK2	-	Apoptosis
Metazoa	0.135496	9	2320	1.88856	GO:0008219	cell death	CASP8,DAPK1,BCL3,TGFB2,LRRK2,SAV1,FZD1,WNT4,BRAT1	-	Apoptosis
Cell_org	0.00339405	7	58	7.364	GO:0090329	regulation of DNA-templated DNA replication	MCM2,MCM6,MCM7,RFC5,ATRX,PCNA,BLM	RFC5	Cell cycle
Cell_org	0.150116	2	13	9.38708	GO:1900262	regulation of DNA-directed DNA polymerase activity	RFC5,PCNA	RFC5	Cell cycle
Cell_org	0.150116	2	13	9.38708	GO:1900264	positive regulation of DNA-directed DNA polymerase activity	RFC5,PCNA	RFC5	Cell cycle
Cell_org	0.00619565	33	996	2.02161	GO:0000278	mitotic cell cycle	CDK14,MCM2,MCM6,CUL9,CCNB1,CENPE,MITD1,RAD21,CDK5,CKAP5,DCTN1,CDC20,VPS4B,PTEN,KAT5,BLM,MSH2,PCNA,MEPCE,CUL4B,RTEL1,DGKZ,SPAST,RIOK2,CTDP1,ATRX,TTC28,ZPR1,POGZ,EGFR,DAPK3,CUL1,NEK7	MITD1	Cell cycle
Cell_org	0.00123698	28	689	2.47961	GO:0051301	cell division	MITD1,VPS4B,SUSD2,KAT2A,SGF29,SPAST,NSUN2,CDK14,CTDP1,TTC28,BIRC6,CDC20,SENP5,NEK9,HELLS,CCNB1,CENPE,HMCN1,POGZ,RAD21,CDK5,ARF6,ING2,FUT10,CKAP5,LMLN,DCTN1,BLM	MITD1	Cell cycle
Cell_org	0.00168656	31	825	2.29272	GO:1903047	mitotic cell cycle process	CDK14,MCM2,MCM6,CUL9,CCNB1,MITD1,RAD21,CDK5,CKAP5,DCTN1,CDC20,VPS4B,CENPE,PTEN,KAT5,BLM,MSH2,PCNA,MEPCE,CUL4B,RTEL1,DGKZ,SPAST,RIOK2,CTDP1,ATRX,ZPR1,POGZ,EGFR,CUL1,DAPK3	MITD1	Cell cycle
Cell_org	0.0232647	13	281	2.8228	GO:0033044	regulation of chromosome organization	RTEL1,CDC20,PIF1,KAT5,MCM2,ATRX,RAD21,PNKP,RIOK2,CCNB1,NAT10,CENPE,NEK7	KAT5	Cell cycle
Cell_org	0.101047	6	108	3.38978	GO:0033045	regulation of sister chromatid segregation	CDC20,KAT5,RAD21,RIOK2,CCNB1,CENPE	KAT5	Cell cycle
Cell_org	0.130542	4	57	4.28182	GO:0033047	regulation of mitotic sister chromatid segregation	CDC20,KAT5,RAD21,CCNB1	KAT5	Cell cycle
Cell_org	0.00987679	37	1213	1.86116	GO:0051726	regulation of cell cycle	CUL9,CCNB1,TTI1,CDC20,SUSD2,KAT2A,NAT10,PTEN,KAT5,BLM,NSUN2,CDK14,ATRX,MSH2,BIRC6,E2F5,CDKL2,MEPCE,CUL4B,RAD21,CDK5,SGF29,DGKZ,SPAST,RIOK2,LRP6,TTC28,ZPR1,MADD,VPS4B,WDR12,CENPE,EGFR,DAPK3,DCTN1,NEK7,IPO7	KAT5	Cell cycle
Cell_org	0.166248	6	133	2.7526	GO:0051983	regulation of chromosome segregation	CDC20,KAT5,RAD21,RIOK2,CCNB1,CENPE	KAT5	Cell cycle
Cell_org	0.0726938	13	346	2.29251	GO:0140014	mitotic nuclear division	CUL9,CCNB1,RAD21,CDC20,CENPE,KAT5,SPAST,RIOK2,CTDP1,ATRX,VPS4B,POGZ,DAPK3	KAT5	Cell cycle
Cell_org	0.0444071	18	514	2.13675	GO:0000280	nuclear division	TOP2B,CUL9,CCNB1,HFM1,RAD21,CDC20,CENPE,KAT5,UBR2,ING2,EHMT2,SPAST,RIOK2,CTDP1,ATRX,VPS4B,POGZ,DAPK3	HFM1	Cell cycle
Cell_org	0.000163923	42	1138	2.25191	GO:0006259	DNA metabolic process	RAD52,PNKP,MCM2,MCM6,TOP2B,MSH2,RFC5,WDR48,ORC4,HELLS,MCM8,PARP2,TEP1,PCNA,REV1,PIF1,HFM1,RAD21,WRN,MCM7,UBE2N,XRCC6,BLM,FAN1,RTEL1,KAT2A,KAT5,SGF29,PARP4,EGFR,CUL4B,HELQ,UBR2,ATRX,GRWD1,ZPR1,ADPRS,POGZ,GIN1,EHMT2,NAT10,NEK7	HFM1	Cell cycle
Cell_org	0.000121851	61	1937	1.92152	GO:0007049	cell cycle	CDK14,MCM2,MCM6,TOP2B,CUL9,CCNB1,CENPE,MITD1,HFM1,RAD21,CDK5,CKAP5,DCTN1,TTI1,CDC20,VPS4B,SUSD2,KAT2A,NAT10,PTEN,KAT5,BLM,SPAST,UBR2,NSUN2,RIOK2,CTDP1,STK10,ATRX,MSH2,TTC28,ZPR1,BIRC6,SENP5,NEK9,HELLS,MCM8,PCNA,E2F5,CDKL2,HMCN1,POGZ,MEPCE,CUL4B,ARF6,MCM7,ING2,SGF29,LMLN,EHMT2,RTEL1,DGKZ,LRP6,MADD,WDR12,EGFR,DAPK3,CUL1,NEK7,WRN,IPO7	HFM1	Cell cycle
Cell_org	0.129457	13	395	2.00812	GO:0007059	chromosome segregation	TOP2B,CCNB1,NEK8,HFM1,RAD21,CDC20,CENPE,KAT5,EHMT2,RIOK2,ATRX,VPS4B,POGZ	HFM1	Cell cycle
Cell_org	0.197827	6	144	2.54233	GO:0007127	meiosis I	TOP2B,HFM1,RAD21,UBR2,ING2,EHMT2	HFM1	Cell cycle
Cell_org	6.57355e-06	13	104	7.627	GO:0032392	DNA geometric change	MCM2,MCM6,PIF1,WRN,MCM7,BLM,RTEL1,MCM8,ATRX,RFC5,HFM1,HELQ,XRCC6	HFM1	Cell cycle
Cell_org	3.44174e-06	13	98	8.09396	GO:0032508	DNA duplex unwinding	MCM2,MCM6,PIF1,WRN,MCM7,BLM,RTEL1,MCM8,ATRX,RFC5,HFM1,HELQ,XRCC6	HFM1	Cell cycle
Cell_org	0.0281813	20	564	2.16369	GO:0048285	organelle fission	TOP2B,CUL9,CCNB1,HFM1,RAD21,CDC20,CENPE,KAT5,UBR2,ING2,EHMT2,SPAST,RIOK2,CTDP1,ATRX,VPS4B,POGZ,INF2,DAPK3,LRRK2	HFM1	Cell cycle
Cell_org	0.000274204	42	1173	2.18472	GO:0051276	chromosome organization	MPND,MCM2,MCM6,TOP2B,TTI1,KAT2A,HELLS,ZNFX1,TEP1,CCNB1,PIF1,RAD21,WRN,MCM7,XRCC6,BLM,RTEL1,CDC20,HDAC4,ATRX,GRWD1,MCM8,CENPE,KAT5,UBR2,RFC5,ASH1L,PCNA,HFM1,HELQ,KMT2D,DAPK3,ING2,SGF29,EHMT2,PNKP,RIOK2,MSH2,VPS4B,NAT10,POGZ,NEK7	HFM1	Cell cycle
Cell_org	0.0904574	7	136	3.14053	GO:0051304	chromosome separation	TOP2B,HFM1,CDC20,RAD21,RIOK2,CCNB1,CENPE	HFM1	Cell cycle
Cell_org	2.75229e-06	14	113	7.5595	GO:0071103	DNA conformation change	MCM2,MCM6,PIF1,WRN,MCM7,BLM,RTEL1,TOP2B,MCM8,ATRX,RFC5,HFM1,HELQ,XRCC6	HFM1	Cell cycle
Cell_org	0.104294	12	333	2.19877	GO:0098813	nuclear chromosome segregation	TOP2B,CCNB1,HFM1,RAD21,CDC20,CENPE,KAT5,EHMT2,RIOK2,ATRX,VPS4B,POGZ	HFM1	Cell cycle
Cell_org	0.125877	9	228	2.40853	GO:1903046	meiotic cell cycle process	TOP2B,HFM1,RAD21,UBR2,NSUN2,ATRX,CDC20,ING2,EHMT2	HFM1	Cell cycle
Eukaryote	0.162791	10	1213	2.35789	GO:0051726	regulation of cell cycle	PIM2,MUS81,BRCA2,CENPJ,GLI1,CCNK,TFDP2,SGF29,SLF1,HCFC1	CCNK	Cell cycle
Eukaryote	0.170575	13	1937	1.91955	GO:0007049	cell cycle	PIM2,CENPJ,MUS81,BRCA2,GLI1,CIB1,CCNK,SUN2,TFDP2,POC5,HCFC1,SGF29,SLF1	CCNK	Cell cycle
Eukaryote	0.088088	6	378	4.53988	GO:0045787	positive regulation of cell cycle	CENPJ,GLI1,CCNK,BRCA2,SLF1,HCFC1	CCNK	Cell cycle
Metazoa	0.162867	1	35	13.9094	GO:0006336	DNA replication-independent chromatin assembly	UBN2	-	Cell cycle
Cell_org	0.00987679	37	1213	1.86116	GO:0051726	regulation of cell cycle	CUL9,CCNB1,TTI1,CDC20,SUSD2,KAT2A,NAT10,PTEN,KAT5,BLM,NSUN2,CDK14,ATRX,MSH2,BIRC6,E2F5,CDKL2,MEPCE,CUL4B,RAD21,CDK5,SGF29,DGKZ,SPAST,RIOK2,LRP6,TTC28,ZPR1,MADD,VPS4B,WDR12,CENPE,EGFR,DAPK3,DCTN1,NEK7,IPO7	KAT5	Cell cycle
Cell_org	0.000121851	61	1937	1.92152	GO:0007049	cell cycle	CDK14,MCM2,MCM6,TOP2B,CUL9,CCNB1,CENPE,MITD1,HFM1,RAD21,CDK5,CKAP5,DCTN1,TTI1,CDC20,VPS4B,SUSD2,KAT2A,NAT10,PTEN,KAT5,BLM,SPAST,UBR2,NSUN2,RIOK2,CTDP1,STK10,ATRX,MSH2,TTC28,ZPR1,BIRC6,SENP5,NEK9,HELLS,MCM8,PCNA,E2F5,CDKL2,HMCN1,POGZ,MEPCE,CUL4B,ARF6,MCM7,ING2,SGF29,LMLN,EHMT2,RTEL1,DGKZ,LRP6,MADD,WDR12,EGFR,DAPK3,CUL1,NEK7,WRN,IPO7	HFM1	Cell cycle
Eukaryote	0.170575	13	1937	1.91955	GO:0007049	cell cycle	PIM2,CENPJ,MUS81,BRCA2,GLI1,CIB1,CCNK,SUN2,TFDP2,POC5,HCFC1,SGF29,SLF1	CCNK	Cell cycle
Eukaryote	0.088088	6	378	4.53988	GO:0045787	positive regulation of cell cycle	CENPJ,GLI1,CCNK,BRCA2,SLF1,HCFC1	CCNK	Cell cycle
Eukaryote	0.162791	10	1213	2.35789	GO:0051726	regulation of cell cycle	PIM2,MUS81,BRCA2,CENPJ,GLI1,CCNK,TFDP2,SGF29,SLF1,HCFC1	CCNK	Cell cycle
Metazoa	0.0843865	10	1937	2.51332	GO:0007049	cell cycle	MTBP,TUSC2,HMCN1,ASZ1,WNT4,ATRIP,HCFC1,SLF1,WDR12,TGFB2	-	Cell cycle
Metazoa	0.140481	7	1635	2.08429	GO:0022414	reproductive process	RECK,ASZ1,WNT4,LRRK2,FSIP2,TGFB2,CASP8	-	Cell cycle
Metazoa	0.0466672	5	378	6.43955	GO:0045787	positive regulation of cell cycle	MTBP,WNT4,SLF1,TGFB2,HCFC1	-	Cell cycle
Metazoa	0.0916754	7	1213	2.80941	GO:0051726	regulation of cell cycle	MTBP,WNT4,ATRIP,SLF1,WDR12,TGFB2,HCFC1	-	Cell cycle
Cell_org	0.00082256	44	1321	2.03233	GO:0022402	cell cycle process	CDK14,MCM2,MCM6,TOP2B,CUL9,CCNB1,MITD1,HFM1,RAD21,CDK5,CKAP5,DCTN1,TTI1,CDC20,VPS4B,SUSD2,KAT2A,NAT10,CENPE,PTEN,KAT5,BLM,SPAST,UBR2,NSUN2,ATRX,MSH2,ZPR1,BIRC6,PCNA,MEPCE,CUL4B,ING2,EHMT2,RTEL1,DGKZ,RIOK2,CTDP1,POGZ,EGFR,CUL1,NEK7,WRN,DAPK3	HFM1	Cell cycle
Eukaryote	0.16296	1	3	95.3375	GO:0007113	endomitotic cell cycle	CIB1	-	Cell cycle
Metazoa	0.147109	1	28	17.3868	GO:0007064	mitotic sister chromatid cohesion	SLF1	-	Cell cycle
Cell_org	0.0274321	4	28	8.71657	GO:0007064	mitotic sister chromatid cohesion	RAD21,CDC20,ATRX,POGZ	-	Cell cycle
Metazoa	0.0858541	1	4	121.707	GO:0007089	traversing start control point of mitotic cell cycle	MTBP	-	Cell cycle
Cell_org	0.163838	5	97	3.14515	GO:0007091	metaphase/anaphase transition of mitotic cell cycle	CDC20,RAD21,RIOK2,CCNB1,CENPE	-	Cell cycle
Eukaryote	0.190702	2	70	8.17179	GO:0030865	cortical cytoskeleton organization	FHOD3,FMNL3	-	Cytoskeleton organization
Cell_org	0.113297	8	182	2.68202	GO:1902850	microtubule cytoskeleton organization involved in mitosis	CKAP5,DCTN1,KAT5,CDC20,SPAST,VPS4B,CCNB1,CENPE	KAT5	Cytoskeleton organization
Eukaryote	0.174046	7	769	2.60349	GO:0030036	actin cytoskeleton organization	RHPN2,FHOD3,TWF1,FMNL3,KPTN,GRB2,GAB1	-	Cytoskeleton organization
Cell_org	0.047177	22	689	1.94826	GO:0000226	microtubule cytoskeleton organization	TTLL4,DRC1,SIK3,TTLL6,CKAP5,DCTN1,SPAST,KAT2A,NAT10,KAT5,ATRX,ZPR1,CUL9,CDC20,CEP20,MET,VPS4B,CCNB1,RAC1,CENPE,NEK7,CDK5	TTLL6	Cytoskeleton organization
Cell_org	0.0520804	41	1594	1.56942	GO:0007010	cytoskeleton organization	TESK2,ASAP3,MACF1,HIP1,MYO1B,MYO5C,TTLL4,RAC1,FGD4,FMNL2,DRC1,SIK3,BRWD3,TTLL6,CKAP5,FLII,DCTN1,SPAST,MET,KAT2A,NAT10,ARF6,DAPK3,KAT5,FARP2,ATRX,ZPR1,CUL9,CDC20,CEP20,FTCD,CDK5,INF2,VPS4B,CCNB1,CENPE,HMCN1,ZMYM3,FGD6,PLD2,NEK7	TTLL6	Cytoskeleton organization
Cell_org	1.05262e-11	126	3932	1.95524	GO:0006464	cellular protein modification process	UBR2,CUL1,CDK14,CTDP1,HDAC4,NEDD4,TRAF5,ULK2,PIGU,PTPRS,PIGL,KAT2A,DPH1,TRIM2,TRIM3,CUL9,WDR48,MOGS,AAK1,SENP5,P4HA1,WWP1,PIGT,TRAF2,PARP2,PPIL4,TRAF3,MGAT1,PTPRA,DPH2,CCNB1,TTLL4,CDKL2,TMTC3,PTPRF,UFC1,HERC4,UBC,PTPRD,CUL4B,SNRK,RPN1,SENP2,CDK5,TPST1,TTLL6,PTEN,SGF29,ULK1,UBE2N,DTX3,TBK1,UBE2F,LRRK2,WNK3,ASPH,PDPR,KMT2D,KAT5,MVP,ROS1,FGFR3,LRP6,STK10,TRAF4,PARP4,RIPK2,ASH1L,ADPRS,CDC20,NAT10,EGF…	TTLL6	Cytoskeleton organization
Cell_org	0.0914978	52	2254	1.40765	GO:0006928	movement of cell or subcellular component	USH2A,AP3D1,MET,KIF17,PLCG1,MYO1B,MYO5C,PLD2,RAC1,CENPE,CNTN5,FMNL2,DRC1,KIF27,PTEN,EPHB4,ING2,MACF1,MIEN1,AIMP1,GAS6,SPAST,HDAC4,ABCC9,STK10,TOP2B,ASAP3,ASH1L,ECE1,KIFC3,EGFR,NTRK2,RYK,CDK5,FAT3,ARF6,SGPL1,NOD2,DAPK3,TTLL6,FUT10,OXSR1,ADA,RYR2,LRIG2,FOXP1,RECK,PTPRF,MITF,LRRK2,IRAK4,DGKZ	TTLL6	Cytoskeleton organization
Cell_org	0.00157405	102	4206	1.4797	GO:0006996	organelle organization	LMAN1,MPND,AP3D1,TESK2,MCM2,MCM6,TOP2B,ULK2,ASAP3,TTI1,COG4,KAT2A,ZPR1,MDN1,CUL9,RAB32,HELLS,ZNFX1,MACF1,HIP1,MYO1B,MYO5C,TEP1,ERAL1,CEP20,CCNB1,TTLL4,RAC1,FGD4,PIF1,OXA1L,FMNL2,DRC1,SIK3,WDR90,HFM1,RAD21,BRWD3,WRN,MCM7,RAB8A,TTLL6,MFN1,CKAP5,ULK1,FLII,LRRK2,XRCC6,BLM,DCTN1,VPS16,RTEL1,TRIP4,CDC20,VPS4B,SPAST,HDAC4,ATRX,GRWD1,MET,MCM8,RAB2B,NAT10,CENPE,ARF6,DAPK3,KAT5,FARP2,UBR2,PTPRS,RFC5,ASH1L,…	TTLL6	Cytoskeleton organization
Cell_org	0.0520804	41	1594	1.56942	GO:0007010	cytoskeleton organization	TESK2,ASAP3,MACF1,HIP1,MYO1B,MYO5C,TTLL4,RAC1,FGD4,FMNL2,DRC1,SIK3,BRWD3,TTLL6,CKAP5,FLII,DCTN1,SPAST,MET,KAT2A,NAT10,ARF6,DAPK3,KAT5,FARP2,ATRX,ZPR1,CUL9,CDC20,CEP20,FTCD,CDK5,INF2,VPS4B,CCNB1,CENPE,HMCN1,ZMYM3,FGD6,PLD2,NEK7	TTLL6	Cytoskeleton organization
Cell_org	0.0382665	29	986	1.79459	GO:0007017	microtubule-based process	AP3D1,KIF17,MACF1,TTLL4,CENPE,DRC1,SIK3,KIF27,TTLL6,CKAP5,DCTN1,SPAST,KAT2A,NAT10,KAT5,ATRX,ZPR1,CUL9,ASH1L,CDC20,CEP20,KIFC3,ING2,MET,VPS4B,CCNB1,RAC1,NEK7,CDK5	TTLL6	Cytoskeleton organization
Eukaryote	0.162526	12	1594	2.15317	GO:0007010	cytoskeleton organization	SPAG1,RHPN2,FHOD3,TWF1,CENPJ,FMNL3,CIB1,SUN2,KPTN,GRB2,GAB1,BRCA2	-	Cytoskeleton organization
Cell_org	0.18444	4	70	3.48663	GO:0030865	cortical cytoskeleton organization	RAC1,FMNL2,ARF6,CDK5	-	Cytoskeleton organization
Metazoa	0.0858541	4	385	5.05797	GO:0031589	cell-substrate adhesion	NID2,FBLN2,WNT4,RSU1	-	Cytoskeleton organization
Eukaryote	0.170575	6	574	2.98968	GO:0051493	regulation of cytoskeleton organization	RHPN2,TWF1,CENPJ,CIB1,FHOD3,GRB2	-	Cytoskeleton organization
Eukaryote	0.0964229	4	169	6.76953	GO:0051494	negative regulation of cytoskeleton organization	RHPN2,TWF1,CIB1,FHOD3	-	Cytoskeleton organization
Cell_org	0.177168	8	214	2.28097	GO:0051495	positive regulation of cytoskeleton organization	RAC1,CKAP5,DCTN1,SPAST,MET,VPS4B,ARF6,CDK5	-	Cytoskeleton organization
Eukaryote	0.174046	7	769	2.60349	GO:0030036	actin cytoskeleton organization	RHPN2,FHOD3,TWF1,FMNL3,KPTN,GRB2,GAB1	-	Cytoskeleton organization
Eukaryote	0.190702	2	70	8.17179	GO:0030865	cortical cytoskeleton organization	FHOD3,FMNL3	-	Cytoskeleton organization
Cell_org	0.18444	4	70	3.48663	GO:0030865	cortical cytoskeleton organization	RAC1,FMNL2,ARF6,CDK5	-	Cytoskeleton organization
Eukaryote	0.170575	2	48	11.9172	GO:0030866	cortical actin cytoskeleton organization	FHOD3,FMNL3	-	Cytoskeleton organization
Metazoa	0.11706	8	1806	2.1565	GO:0048870	cell motility	TGFB2,EPHA4,WNT4,LDB2,BRAT1,RECK,FSIP2,LRRK2	-	Cytoskeleton organization
Cell_org	0.000410155	37	992	2.2758	GO:0006974	cellular response to DNA damage stimulus	RAD52,PNKP,MCM2,MCM6,MSH2,RFC5,WDR48,MCM8,PARP2,PCNA,REV1,CUL4B,RAD21,WRN,MCM7,UBE2N,XRCC6,BLM,FAN1,RTEL1,TTI1,KAT2A,KAT5,SGF29,BCL3,EGFR,HELQ,ATRX,ADPRS,PIF1,POGZ,DGKZ,NEDD4,SNW1,FOXP1,PARP4,ING2	RFC5	DNA Repair & Recombination
Eukaryote	0.0257027	12	992	3.45983	GO:0006974	cellular response to DNA damage stimulus	FMR1,EYA1,BRCA2,MUS81,SLF1,TAF6L,SGF29,CIB1,TTC5,TRAF6,CCNK,GRB2	CCNK	DNA Repair & Recombination
Eukaryote	0.190702	16	2747	1.66589	GO:0006357	regulation of transcription by RNA polymerase II	CCNK,GLI1,TFDP2,TEAD1,ZBED1,ELP4,CNOT1,RIPK1,HCFC1,TRAF6,SGF29,EYA1,DLL4,TTC5,PCBP3,TAF6L	CCNK	DNA Repair & Recombination
Eukaryote	0.00373818	30	3932	2.18219	GO:0006464	cellular protein modification process	MIB1,FMR1,PIM2,EYA1,HUNK,PGAP2,PTPRD,ALG14,TRAF6,SGF29,GPAA1,SLF1,BRCA2,TAF6L,HCFC1,PIGP,CCNK,ATG4A,RIPK1,TWF1,DAPK1,LAMA1,TRPM6,COP1,SYAP1,CIB1,ZBED1,SNX25,COG7,DAPP1	CCNK	DNA Repair & Recombination
Eukaryote	0.190702	5	478	2.99176	GO:0016032	viral process	CCNK,VAPA,ZBED1,FMR1,HCFC1	CCNK	DNA Repair & Recombination
Eukaryote	0.180537	13	1994	1.86468	GO:0016310	phosphorylation	FMR1,PIM2,HUNK,CCNK,RIPK1,TWF1,TRAF6,DAPK1,LAMA1,TRPM6,SYAP1,CIB1,SNX25	CCNK	DNA Repair & Recombination
Eukaryote	0.0758914	4	135	8.47444	GO:0019079	viral genome replication	CCNK,VAPA,ZBED1,FMR1	CCNK	DNA Repair & Recombination
Eukaryote	0.0758205	27	4338	1.78016	GO:0048583	regulation of response to stimulus	VAPA,FMR1,EYA1,KPTN,C4BPA,DLL4,TRAF6,LAMA1,BRCA2,TAF6L,SGF29,CCNK,GLI1,CNOT1,SLF1,RIPK1,CENPJ,CIB1,DAPK1,SNX25,ARMC9,TWF1,PTPRD,GRB2,NBR1,SZT2,PIM2	CCNK	DNA Repair & Recombination
Metazoa	0.168817	2	219	4.44593	GO:0006282	regulation of DNA repair	ATRIP,SLF1	-	DNA Repair & Recombination
Metazoa	0.134889	7	1594	2.1379	GO:0042981	regulation of apoptotic process	DAPK1,BCL3,TGFB2,CASP8,SAV1,WNT4,LRRK2	-	DNA Repair & Recombination
Cell_org	0.19865	4	73	3.34334	GO:0007004	telomere maintenance via telomerase	PIF1,PNKP,NAT10,NEK7	-	DNA Repair & Recombination
Eukaryote	0.0758205	6	341	5.03248	GO:2001020	regulation of response to DNA damage stimulus	FMR1,EYA1,BRCA2,TAF6L,SGF29,SLF1	-	DNA Repair & Recombination
Eukaryote	0.183235	3	170	5.04728	GO:2001022	positive regulation of response to DNA damage stimulus	FMR1,EYA1,SLF1	-	DNA Repair & Recombination
Cell_org	1.66451e-05	16	180	5.42364	GO:0000725	recombinational repair	RAD52,MCM2,MCM6,WDR48,MCM8,RAD21,WRN,MCM7,BLM,RTEL1,XRCC6,HELQ,KAT5,POGZ,UBE2N,FAN1	KAT5	DNA Repair & Recombination
Cell_org	0.0935559	9	209	2.62748	GO:0000070	mitotic sister chromatid segregation	CCNB1,RAD21,CDC20,CENPE,KAT5,RIOK2,ATRX,VPS4B,POGZ	KAT5	DNA Repair & Recombination
Cell_org	5.95051e-05	15	176	5.20023	GO:0000724	double-strand break repair via homologous recombination	RAD52,MCM2,MCM6,WDR48,MCM8,RAD21,WRN,MCM7,BLM,RTEL1,HELQ,KAT5,POGZ,UBE2N,FAN1	KAT5	DNA Repair & Recombination
Cell_org	2.52092e-05	22	348	3.85733	GO:0006310	DNA recombination	RAD52,MCM2,MCM6,TOP2B,MSH2,WDR48,MCM8,TEP1,HFM1,RAD21,WRN,MCM7,BLM,RTEL1,XRCC6,HELQ,KAT5,UBR2,PIF1,POGZ,UBE2N,FAN1	HFM1	DNA Repair & Recombination
Cell_org	8.74963e-05	30	649	2.82046	GO:0006281	DNA repair	RAD52,PNKP,MCM2,MCM6,MSH2,RFC5,WDR48,MCM8,PARP2,PCNA,REV1,RAD21,WRN,MCM7,UBE2N,XRCC6,BLM,FAN1,RTEL1,KAT2A,KAT5,SGF29,EGFR,CUL4B,HELQ,ATRX,ADPRS,PIF1,POGZ,PARP4	RFC5	DNA Repair & Recombination
Cell_org	0.000410155	18	303	3.62471	GO:0006260	DNA replication	MCM2,MCM6,RFC5,ORC4,PCNA,PIF1,WRN,MCM7,BLM,MCM8,EGFR,ATRX,GRWD1,ZPR1,EHMT2,RTEL1,PNKP,REV1	RFC5	DNA Repair & Recombination
Cell_org	0.000429142	13	164	4.83663	GO:0006261	DNA-templated DNA replication	MCM2,MCM6,RFC5,ORC4,PCNA,WRN,MCM7,BLM,MCM8,ATRX,ZPR1,RTEL1,PNKP	RFC5	DNA Repair & Recombination
Cell_org	0.0263527	9	153	3.58918	GO:0006275	regulation of DNA replication	MCM2,MCM6,MCM7,RFC5,EGFR,ATRX,PCNA,EHMT2,BLM	RFC5	DNA Repair & Recombination
Cell_org	8.74963e-05	30	649	2.82046	GO:0006281	DNA repair	RAD52,PNKP,MCM2,MCM6,MSH2,RFC5,WDR48,MCM8,PARP2,PCNA,REV1,RAD21,WRN,MCM7,UBE2N,XRCC6,BLM,FAN1,RTEL1,KAT2A,KAT5,SGF29,EGFR,CUL4B,HELQ,ATRX,ADPRS,PIF1,POGZ,PARP4	RFC5	DNA Repair & Recombination
Cell_org	0.000410155	37	992	2.2758	GO:0006974	cellular response to DNA damage stimulus	RAD52,PNKP,MCM2,MCM6,MSH2,RFC5,WDR48,MCM8,PARP2,PCNA,REV1,CUL4B,RAD21,WRN,MCM7,UBE2N,XRCC6,BLM,FAN1,RTEL1,TTI1,KAT2A,KAT5,SGF29,BCL3,EGFR,HELQ,ATRX,ADPRS,PIF1,POGZ,DGKZ,NEDD4,SNW1,FOXP1,PARP4,ING2	RFC5	DNA Repair & Recombination
Cell_org	1.66451e-05	69	2160	1.94912	GO:0033554	cellular response to stress	RAD52,FAS,PNKP,MCM2,MCM6,TRAF4,TRAF5,MSH2,TBL2,RFC5,NPRL2,WDR48,MCM8,TRAF2,PARP2,TRAF3,PCNA,REV1,XPR1,CUL4B,CLPB,RAD21,WRN,MCM7,UBE2N,ERN1,XRCC6,BLM,FAN1,RTEL1,TTI1,KAT2A,KAT5,SGF29,BCL3,TRPA1,UFC1,ARNT,EGFR,DDAH1,HELQ,NOD2,LRRK2,EHMT2,ATRX,RIPK2,PTPRS,FOXP1,ADPRS,PIF1,PTPRF,POGZ,ITPR1,ING2,PCSK9,PTEN,OXSR1,ULK1,GAS6,IRAK4,LRIG2,DGKZ,NEDD4,SNW1,MET,TMTC3,WNK3,AGAP3,PARP4	RFC5	DNA Repair & Recombination
Cell_org	4.33769e-05	30	622	2.94289	GO:0051347	positive regulation of transferase activity	MUSK,ROS1,FGFR3,MET,EGFR,NTRK2,RYK,ALK,ROR1,EPHB4,LRRK2,TRAF4,RFC5,CDC20,TRAF2,PTEN,ERN1,GAS6,XRCC6,CSK,MADD,CCNB1,CDK5,NOD2,PNKP,PCNA,CENPE,DGKZ,NEK7,UBE2N	RFC5	DNA Repair & Recombination
Cell_org	0.00435624	83	3356	1.50904	GO:0065009	regulation of molecular function	FAS,MUSK,ROS1,FGFR3,NEDD4,LRP6,TRAF5,NLRP1,MET,RECK,TRAF2,HIP1,TRAF3,CCNB1,EGFR,NTRK2,RYK,ALK,ROR1,EPHB4,WNK3,PDPR,LRRK2,MVP,BCL3,TRAF4,ASAP3,MSH2,PARP4,RIPK2,RIC1,ABCA2,RFC5,NPRL2,CDC20,IDE,PCNA,CSN2,PIF1,FURIN,WRN,TAF3,NOD2,PCSK9,PTEN,ERN1,GAS6,XRCC6,ASPH,RYR2,DHX33,FARP2,ITIH4,ABCC9,MCM2,CSK,HERC1,MADD,BIRC6,AGAP3,FGD4,RGS5,MEPCE,ASAP2,PLCL2,NLRP3,CDK5,NPNT,OXSR1,FGD6,PNKP,HDAC4,CENPE,PTPRF,DG…	RFC5	DNA Repair & Recombination
Cell_org	0.0424754	10	204	2.99098	GO:0071897	DNA biosynthetic process	PCNA,REV1,PARP4,RFC5,PIF1,WRN,TEP1,PNKP,NAT10,NEK7	RFC5	DNA Repair & Recombination
Cell_org	0.0114792	12	219	3.34334	GO:0006282	regulation of DNA repair	RTEL1,KAT2A,KAT5,SGF29,RAD52,WDR48,EGFR,UBE2N,HELQ,PNKP,PCNA,POGZ	KAT5	DNA Repair & Recombination
Cell_org	0.0827829	10	238	2.5637	GO:0000819	sister chromatid segregation	TOP2B,CCNB1,RAD21,CDC20,CENPE,KAT5,RIOK2,ATRX,VPS4B,POGZ	KAT5	DNA Repair & Recombination
Cell_org	0.0114792	12	219	3.34334	GO:0006282	regulation of DNA repair	RTEL1,KAT2A,KAT5,SGF29,RAD52,WDR48,EGFR,UBE2N,HELQ,PNKP,PCNA,POGZ	KAT5	DNA Repair & Recombination
Cell_org	0.000201464	19	312	3.71572	GO:0006302	double-strand break repair	RAD52,MCM2,MCM6,WDR48,MCM8,PARP2,RAD21,WRN,MCM7,XRCC6,BLM,RTEL1,KAT5,PNKP,HELQ,UBE2N,MSH2,POGZ,FAN1	KAT5	DNA Repair & Recombination
Cell_org	0.00665199	54	1964	1.67763	GO:0006508	proteolysis	UBR2,FAS,TLL1,CUL1,NEDD4,NLRP1,TRIM2,TRIM3,WDR48,ECE1,CDC20,SENP5,IDE,RECK,WWP1,HIP1,AGAP3,PCSK6,FURIN,HERC4,CNDP1,UBC,CUL4B,SENP2,BMP1,LTN1,TRIP4,LRRK2,RIPK2,KAT2A,CSN2,FCN2,ATG4B,PCSK9,PTEN,SGF29,GAS6,ASPH,MPND,ITIH4,TRAF4,ABCA2,CUL9,BIRC6,TRAF3,NLRP3,UBE2N,LMLN,LRIG2,VPS4B,TMTC3,CDK5,IFI27,KAT5	KAT5	DNA Repair & Recombination
Cell_org	0.171269	20	751	1.62493	GO:0006511	ubiquitin-dependent protein catabolic process	UBR2,CUL1,NEDD4,TRIM2,TRIM3,CDC20,WWP1,AGAP3,HERC4,CUL4B,LTN1,TRIP4,PTEN,TRAF4,CUL9,UBE2N,LRRK2,VPS4B,IFI27,KAT5	KAT5	DNA Repair & Recombination
Cell_org	0.148023	4	61	4.00105	GO:0007080	mitotic metaphase plate congression	CCNB1,CENPE,KAT5,VPS4B	KAT5	DNA Repair & Recombination
Cell_org	0.0126009	43	1514	1.73295	GO:0009057	macromolecule catabolic process	UBR2,CUL1,NEDD4,MANBA,TRIM2,DCPS,TRIM3,CDC20,IDE,WWP1,HELZ2,AGAP3,DHX34,HERC4,UBC,CUL4B,TTC37,LTN1,TRIP4,FURIN,CNOT9,ABCA2,EGFR,NELL1,PCSK9,PTEN,NSUN2,TRAF4,TRAF5,GGA1,CUL9,TRAF2,CDK5,UBE2N,LRRK2,LRIG2,RIC1,ZPR1,VPS4B,TMTC3,IFI27,KAT5,ERN1	KAT5	DNA Repair & Recombination
Cell_org	0.172118	14	471	1.81364	GO:0009314	response to radiation	XRCC6,CUL4B,BCL3,PCNA,REV1,EGFR,WRN,KAT5,BLM,MSH2,ABCG5,CDK5,NEDD4,PNKP	KAT5	DNA Repair & Recombination
Cell_org	0.0475047	74	3283	1.37532	GO:0009892	negative regulation of metabolic process	HDAC4,DCPS,FOXP1,HELLS,RECK,ZNFX1,HELZ2,DHX34,CNOT9,KAT5,LRRK2,HELZ,TTC37,RTEL1,ING2,MVP,BCL3,LRP6,MSH2,SNW1,ABCA2,NPRL2,CDC20,ZMYM2,CSN2,RAC1,PIF1,FURIN,EGFR,SENP2,TAF3,NELL1,DAPK3,PCSK9,PTEN,DEAF1,GAS6,EHMT2,UBR2,NSUN2,ROS1,ITIH4,TRAF5,ATRX,CSK,HERC1,BIRC6,WWP1,TRAF2,PCNA,MEPCE,LRRK1,PLCL2,CDK5,NOD2,ALK,TBK1,LRIG2,NTRK2,IFI27,PNKP,NEDD4,PTPRS,RIC1,NAT10,ANXA7,MITF,XRCC6,BLM,ABCB7,KMT2D,MET,ERN1…	KAT5	DNA Repair & Recombination
Cell_org	0.000270835	40	1088	2.24324	GO:0009894	regulation of catabolic process	NEDD4,ULK2,DCPS,NPRL2,CDC20,WWP1,ULK1,LRRK2,FURIN,ARNT,CNOT9,ABCA2,EGFR,NELL1,PCSK9,PTEN,KAT5,TBK1,NSUN2,HDAC4,TRAF5,GGA1,HERC1,RIPK2,TRAF2,CUL4B,NOD2,ALK,LRIG2,EHMT2,RIC1,DHX34,TMTC3,RAB8A,MET,IDE,ITPR1,CDK5,DAPK3,ERN1	KAT5	DNA Repair & Recombination
Cell_org	0.0119162	22	586	2.2907	GO:0009896	positive regulation of catabolic process	NEDD4,ULK2,DCPS,NPRL2,CDC20,WWP1,ULK1,LRRK2,FURIN,ARNT,CNOT9,ABCA2,PCSK9,PTEN,KAT5,TBK1,GGA1,RIPK2,CUL4B,NOD2,TMTC3,IDE	KAT5	DNA Repair & Recombination
Cell_org	0.0073895	17	369	2.81104	GO:0010506	regulation of autophagy	ULK2,NPRL2,ULK1,LRRK2,KAT5,TBK1,HERC1,RIPK2,NOD2,EHMT2,RAB8A,MET,NEDD4,ITPR1,CDK5,DAPK3,ERN1	KAT5	DNA Repair & Recombination
Cell_org	0.0645354	8	154	3.16966	GO:0010508	positive regulation of autophagy	ULK2,NPRL2,ULK1,LRRK2,KAT5,TBK1,RIPK2,NOD2	KAT5	DNA Repair & Recombination
Cell_org	0.0300907	25	781	1.95314	GO:0010564	regulation of cell cycle process	CUL9,TTI1,CDC20,SUSD2,KAT2A,CCNB1,NAT10,PTEN,KAT5,BLM,NSUN2,ATRX,MSH2,BIRC6,MEPCE,CUL4B,RAD21,DGKZ,SPAST,RIOK2,VPS4B,CENPE,EGFR,DCTN1,DAPK3	KAT5	DNA Repair & Recombination
Cell_org	0.0935559	5	75	4.06773	GO:0010569	regulation of double-strand break repair via homologous recombination	RTEL1,WDR48,KAT5,HELQ,POGZ	KAT5	DNA Repair & Recombination
Cell_org	0.0930369	67	3057	1.33728	GO:0010605	negative regulation of macromolecule metabolic process	HDAC4,DCPS,FOXP1,HELLS,RECK,ZNFX1,HELZ2,DHX34,CNOT9,KAT5,HELZ,TTC37,RTEL1,ING2,LRRK2,MVP,BCL3,LRP6,MSH2,SNW1,CDC20,ZMYM2,CSN2,RAC1,PIF1,FURIN,EGFR,SENP2,TAF3,NELL1,DAPK3,PCSK9,PTEN,DEAF1,GAS6,EHMT2,UBR2,NSUN2,ROS1,ITIH4,TRAF5,ATRX,CSK,BIRC6,WWP1,TRAF2,PCNA,MEPCE,LRRK1,CDK5,NOD2,TBK1,LRIG2,NTRK2,IFI27,PNKP,NEDD4,PTPRS,RIC1,NAT10,ANXA7,MITF,XRCC6,BLM,KMT2D,ERN1,IPO7	KAT5	DNA Repair & Recombination
Cell_org	0.13863	28	1110	1.53914	GO:0010629	negative regulation of gene expression	DCPS,HELLS,ZNFX1,HELZ2,DHX34,CNOT9,HELZ,TTC37,LRRK2,FOXP1,RAC1,DAPK3,KAT5,GAS6,UBR2,ROS1,BCL3,TRAF5,CSK,TRAF2,NOD2,TBK1,PTPRS,ANXA7,FURIN,EGFR,KMT2D,ERN1	KAT5	DNA Repair & Recombination
Cell_org	0.162525	16	555	1.75902	GO:0010638	positive regulation of organelle organization	RAC1,KAT5,CKAP5,DCTN1,SPAST,ATRX,ULK1,RTEL1,PNKP,LMAN1,MET,VPS4B,NEK7,RAD21,ARF6,CDK5	KAT5	DNA Repair & Recombination
Cell_org	0.130542	42	1810	1.41584	GO:0010941	regulation of cell death	FAS,MADD,BIRC6,MIEN1,EGFR,DAPK3,VPS4B,KAT5,BCL3,RIPK2,DCPS,FOXP1,TRAF2,HIP1,CDK5,GAS6,LRRK2,HDAC4,TRAF4,TRAF5,NLRP1,MSH2,ZPR1,ADPRS,HELLS,PARP2,TRAF3,NTRK2,NOD2,ING2,PCSK9,PTEN,MITF,ADA,WRN,LRP6,MET,PLCG1,WNK3,TRIM2,TBK1,ALK	KAT5	DNA Repair & Recombination
Cell_org	0.100345	26	958	1.65597	GO:0014070	response to organic cyclic compound	LRRK2,NEDD4,SNW1,TRIP4,FOXP1,EGFR,KAT5,ADA,BLM,ASPH,RYR2,RIPK2,TRPA1,KAT2A,PCNA,SDK1,CDK5,NOD2,ALK,EHMT2,ABCA2,ABCC9,LRP6,KYNU,CNOT9,KMT2D	KAT5	DNA Repair & Recombination
Cell_org	0.148636	16	543	1.79789	GO:0016570	histone modification	UBR2,HDAC4,KAT2A,SGF29,KMT2D,KAT5,ASH1L,PARP2,CUL4B,EHMT2,CDK5,ING2,LRRK2,ATRX,SNW1,UBE2N	KAT5	DNA Repair & Recombination
Cell_org	0.132319	21	761	1.68375	GO:0019941	modification-dependent protein catabolic process	UBR2,CUL1,NEDD4,TRIM2,TRIM3,CDC20,WWP1,AGAP3,HERC4,UBC,CUL4B,LTN1,TRIP4,PTEN,TRAF4,CUL9,UBE2N,LRRK2,VPS4B,IFI27,KAT5	KAT5	DNA Repair & Recombination
Cell_org	0.0476232	18	519	2.11616	GO:0022411	cellular component disassembly	DHX8,ULK2,ULK1,FLII,TRIP4,VPS4B,KAT5,SPAST,CDK5,ARF6,ASPH,GRWD1,UFC1,ATG4B,DCTN1,VPS16,FURIN,CKAP5	KAT5	DNA Repair & Recombination
Cell_org	0.0253544	33	1124	1.7914	GO:0030163	protein catabolic process	UBR2,CUL1,NEDD4,MANBA,TRIM2,TRIM3,CDC20,IDE,WWP1,AGAP3,HERC4,UBC,CUL4B,LTN1,TRIP4,FURIN,ABCA2,EGFR,NELL1,PCSK9,PTEN,TRAF4,GGA1,CUL9,TRAF2,UBE2N,LRRK2,LRIG2,RIC1,VPS4B,TMTC3,IFI27,KAT5	KAT5	DNA Repair & Recombination
Cell_org	0.00693071	31	918	2.06045	GO:0031329	regulation of cellular catabolic process	ULK2,DCPS,NPRL2,CDC20,ULK1,LRRK2,FURIN,ARNT,CNOT9,ABCA2,PCSK9,PTEN,KAT5,TBK1,NSUN2,TRAF5,HERC1,RIPK2,TRAF2,NOD2,LRIG2,EHMT2,DHX34,TMTC3,RAB8A,MET,NEDD4,ITPR1,CDK5,DAPK3,ERN1	KAT5	DNA Repair & Recombination
Cell_org	0.0645354	17	501	2.0704	GO:0031331	positive regulation of cellular catabolic process	ULK2,DCPS,NPRL2,CDC20,ULK1,LRRK2,FURIN,ARNT,CNOT9,ABCA2,PCSK9,PTEN,KAT5,TBK1,RIPK2,NOD2,TMTC3	KAT5	DNA Repair & Recombination
Cell_org	0.00724197	47	1641	1.74756	GO:0031399	regulation of protein modification process	PPIL4,CCNB1,LRRK2,MVP,HDAC4,LRP6,TRAF4,RIPK2,CDC20,TRAF2,EGFR,SENP2,PTEN,KAT5,ULK1,UBE2N,ERN1,ITLN1,GAS6,XRCC6,WNK3,CSK,KAT2A,MADD,WDR48,ARNT,NTRK2,LRRK1,CDK5,NOD2,ING2,ALK,EHMT2,FAS,MUSK,PNKP,FGFR3,ATRX,SNW1,ABCA2,RAC1,CENPE,CNOT9,SGF29,BLM,TBK1,IPO7	KAT5	DNA Repair & Recombination
Cell_org	0.00508904	35	1064	2.00711	GO:0031401	positive regulation of protein modification process	LRRK2,HDAC4,TRAF4,RIPK2,CDC20,TRAF2,EGFR,PTEN,KAT5,UBE2N,ERN1,ITLN1,GAS6,XRCC6,WNK3,CSK,KAT2A,MADD,CCNB1,ARNT,NTRK2,LRRK1,CDK5,NOD2,ING2,ALK,FAS,MUSK,FGFR3,SNW1,RAC1,CENPE,CNOT9,SENP2,TBK1	KAT5	DNA Repair & Recombination
Cell_org	0.0034471	68	2575	1.6113	GO:0032268	regulation of cellular protein metabolic process	FAS,NLRP1,DPH1,DCPS,CDC20,RECK,HIP1,PPIL4,DPH2,CCNB1,CNOT9,RMND1,FURIN,LRRK2,MVP,HDAC4,LRP6,TRAF4,RIPK2,ABCA2,TRAF2,CSN2,NAT10,EGFR,CNDP1,SENP2,DAPK3,PCSK9,PTEN,KAT5,ULK1,UBE2N,ERN1,ITLN1,GAS6,XRCC6,WNK3,ASPH,ITIH4,CSK,KAT2A,MADD,WDR48,BIRC6,ARNT,NTRK2,LRRK1,NLRP3,CDK5,NOD2,ING2,ALK,LRIG2,EHMT2,MUSK,PNKP,FGFR3,BCL3,ATRX,SNW1,NSUN5,RAC1,CENPE,TMTC3,SGF29,BLM,TBK1,IPO7	KAT5	DNA Repair & Recombination
Cell_org	0.00163041	47	1504	1.90675	GO:0032270	positive regulation of cellular protein metabolic process	FAS,NLRP1,CDC20,HIP1,RMND1,FURIN,LRRK2,HDAC4,TRAF4,RIPK2,ABCA2,TRAF2,NAT10,EGFR,PCSK9,PTEN,KAT5,UBE2N,ERN1,ITLN1,GAS6,XRCC6,WNK3,ASPH,CSK,KAT2A,MADD,CCNB1,ARNT,NTRK2,LRRK1,NLRP3,CDK5,NOD2,ING2,ALK,MUSK,FGFR3,BCL3,SNW1,NSUN5,RAC1,CENPE,TMTC3,CNOT9,SENP2,TBK1	KAT5	DNA Repair & Recombination
Cell_org	0.180437	4	69	3.53716	GO:0032623	interleukin-2 production	KAT5,RIPK2,NOD2,TRAF2	KAT5	DNA Repair & Recombination
Cell_org	0.180437	4	69	3.53716	GO:0032663	regulation of interleukin-2 production	KAT5,RIPK2,NOD2,TRAF2	KAT5	DNA Repair & Recombination
Cell_org	0.0828906	33	1269	1.5867	GO:0033043	regulation of organelle organization	ASAP3,CUL9,RAC1,FLII,LRRK2,RTEL1,CDC20,MET,KAT2A,PIF1,DAPK3,KAT5,CKAP5,DCTN1,SPAST,MCM2,ATRX,PTPRS,PTPRD,RAD21,ULK1,EHMT2,PNKP,RIOK2,LMAN1,VPS4B,CCNB1,NAT10,CENPE,NEK7,ARF6,INF2,CDK5	KAT5	DNA Repair & Recombination
Cell_org	0.0354414	8	132	3.69794	GO:0045739	positive regulation of DNA repair	WDR48,EGFR,KAT5,UBE2N,HELQ,PNKP,PCNA,POGZ	KAT5	DNA Repair & Recombination
Cell_org	0.0886815	5	73	4.17918	GO:0045911	positive regulation of DNA recombination	WDR48,KAT5,MSH2,HELQ,POGZ	KAT5	DNA Repair & Recombination
Cell_org	0.0915788	24	852	1.71876	GO:0060341	regulation of cellular localization	LMAN1,ZPR1,SCP2,LRRK2,RYR2,NSUN2,NEDD4,CSK,ABCA2,EGFR,MEPCE,PCSK9,KAT5,GAS6,WNK3,ASPH,CDK5,ARF6,PTEN,LRIG2,IFI27,RIOK2,VPS4B,PLCG1	KAT5	DNA Repair & Recombination
Cell_org	0.00163041	30	782	2.34077	GO:0080135	regulation of cellular response to stress	FAS,TRAF4,TRAF5,TRAF2,TRAF3,RTEL1,TTI1,KAT2A,KAT5,SGF29,RAD52,WDR48,EGFR,DDAH1,NOD2,UBE2N,RIPK2,PTPRS,FOXP1,PTPRF,HELQ,PTEN,LRIG2,PNKP,MET,PCNA,POGZ,ERN1,LRRK2,ING2	KAT5	DNA Repair & Recombination
Cell_org	0.00508904	45	1510	1.81836	GO:1901565	organonitrogen compound catabolic process	UBR2,CUL1,NEDD4,MOXD1,MANBA,TRIM2,TRIM3,KYNU,CDC20,IDE,WWP1,SARDH,IVD,AGAP3,DPYS,HERC4,UBC,CUL4B,SGPL1,ADA,LTN1,TRIP4,FURIN,ABCA2,ECE1,EGFR,DDAH1,NELL1,PCSK9,PTEN,TRAF4,GGA1,CUL9,TRAF2,FTCD,UBE2N,LRRK2,LRIG2,RIC1,VPS4B,TMTC3,IFI27,KAT5,NUDT8,HYKK	KAT5	DNA Repair & Recombination
Cell_org	0.161868	40	1752	1.39306	GO:1901700	response to oxygen-containing compound	NOD2,RAB8A,LRRK2,SHPK,UBR2,SNW1,RIPK2,TRPA1,DCPS,FOXP1,POSTN,EGFR,KAT5,ERN1,GAS6,BLM,ASPH,LRP6,ARSA,CSK,ADPRS,TRAF2,PCNA,PTPRA,SDK1,NTRK2,NLRP3,CDK5,PCSK9,ALK,RYR2,EHMT2,MRC1,ABCA2,ABCC9,MET,KYNU,AGAP3,NLRP1,IDE	KAT5	DNA Repair & Recombination
Cell_org	0.0848456	33	1272	1.58296	GO:1901701	cellular response to oxygen-containing compound	RAB8A,LRRK2,SHPK,UBR2,SNW1,RIPK2,TRPA1,DCPS,POSTN,EGFR,NOD2,KAT5,ERN1,GAS6,BLM,CSK,FOXP1,ADPRS,TRAF2,PCNA,PTPRA,NTRK2,NLRP3,CDK5,PCSK9,ALK,RYR2,EHMT2,MRC1,LRP6,MET,AGAP3,IDE	KAT5	DNA Repair & Recombination
Cell_org	0.101047	7	141	3.02916	GO:1903008	organelle disassembly	ULK2,ULK1,TRIP4,KAT5,SPAST,UFC1,ATG4B	KAT5	DNA Repair & Recombination
Cell_org	0.0693196	4	41	5.95278	GO:1905168	positive regulation of double-strand break repair via homologous recombination	WDR48,KAT5,HELQ,POGZ	KAT5	DNA Repair & Recombination
Cell_org	0.101047	7	141	3.02916	GO:2000779	regulation of double-strand break repair	RTEL1,KAT5,WDR48,UBE2N,HELQ,PNKP,POGZ	KAT5	DNA Repair & Recombination
Cell_org	0.0649162	6	92	3.9793	GO:2000781	positive regulation of double-strand break repair	WDR48,KAT5,UBE2N,HELQ,PNKP,POGZ	KAT5	DNA Repair & Recombination
Cell_org	0.0361804	14	341	2.50506	GO:2001020	regulation of response to DNA damage stimulus	RTEL1,TTI1,KAT2A,KAT5,SGF29,RAD52,WDR48,EGFR,UBE2N,HELQ,PNKP,PCNA,POGZ,ING2	KAT5	DNA Repair & Recombination
Cell_org	0.0420991	9	170	3.23026	GO:2001022	positive regulation of response to DNA damage stimulus	TTI1,WDR48,EGFR,KAT5,UBE2N,HELQ,PNKP,PCNA,POGZ	KAT5	DNA Repair & Recombination
Cell_org	0.130542	6	120	3.0508	GO:2001252	positive regulation of chromosome organization	KAT5,ATRX,RTEL1,PNKP,NEK7,RAD21	KAT5	DNA Repair & Recombination
Eukaryote	0.190702	3	180	4.76687	GO:0000725	recombinational repair	BRCA2,MUS81,SLF1	-	DNA Repair & Recombination
Eukaryote	0.146964	4	219	5.22397	GO:0006282	regulation of DNA repair	EYA1,TAF6L,SGF29,SLF1	-	DNA Repair & Recombination
Cell_org	0.0265597	5	47	6.49106	GO:0006284	base-excision repair	WRN,PARP2,PCNA,PNKP,ADPRS	-	DNA Repair & Recombination
Cell_org	0.0476232	4	35	6.97326	GO:0006301	postreplication repair	PCNA,REV1,UBE2N,MSH2	-	DNA Repair & Recombination
Metazoa	0.168817	2	219	4.44593	GO:0006282	regulation of DNA repair	ATRIP,SLF1	-	DNA Repair & Recombination
Eukaryote	0.146964	4	219	5.22397	GO:0006282	regulation of DNA repair	EYA1,TAF6L,SGF29,SLF1	-	DNA Repair & Recombination
Cell_org	0.0850735	7	133	3.21137	GO:0000018	regulation of DNA recombination	RTEL1,MSH2,WDR48,KAT5,HELQ,POGZ,BLM	KAT5	DNA Repair & Recombination
Cell_org	0.195405	2	17	7.17835	GO:0000712	resolution of meiotic recombination intermediates	TOP2B,HFM1	HFM1	DNA Repair & Recombination
Cell_org	0.155591	4	63	3.87403	GO:0007131	reciprocal meiotic recombination	TOP2B,HFM1,UBR2,RAD21	HFM1	DNA Repair & Recombination
Cell_org	0.18444	4	70	3.48663	GO:0035825	homologous recombination	TOP2B,HFM1,UBR2,RAD21	HFM1	DNA Repair & Recombination
Cell_org	0.155591	4	63	3.87403	GO:0140527	reciprocal homologous recombination	TOP2B,HFM1,UBR2,RAD21	HFM1	DNA Repair & Recombination
Cell_org	0.100345	3	26	7.04031	GO:0006312	mitotic recombination	RAD52,MSH2,TEP1	-	DNA Repair & Recombination
Cell_org	1.66451e-05	16	180	5.42364	GO:0000725	recombinational repair	RAD52,MCM2,MCM6,WDR48,MCM8,RAD21,WRN,MCM7,BLM,RTEL1,XRCC6,HELQ,KAT5,POGZ,UBE2N,FAN1	KAT5	DNA Repair & Recombination
Eukaryote	0.190702	3	176	4.87521	GO:0000724	double-strand break repair via homologous recombination	BRCA2,MUS81,SLF1	-	DNA Repair & Recombination
Cell_org	0.0241881	3	12	15.254	GO:0000727	double-strand break repair via break-induced replication	MCM2,MCM6,MCM7	-	DNA Repair & Recombination
Cell_org	0.0325787	3	14	13.0749	GO:0006287	base-excision repair gap-filling	PCNA,PNKP,ADPRS	-	DNA Repair & Recombination
Cell_org	0.0745594	2	7	17.4331	GO:0010792	DNA double-strand break processing involved in repair via single-strand annealing	RAD52,HELQ	-	DNA Repair & Recombination
Cell_org	0.00601984	11	167	4.01902	GO:0000723	telomere maintenance	TEP1,WRN,XRCC6,BLM,RTEL1,PIF1,ATRX,PCNA,PNKP,NAT10,NEK7	-	DNA Repair & Recombination
Cell_org	0.190934	3	41	4.46459	GO:0000731	DNA synthesis involved in DNA repair	PCNA,REV1,WRN	-	DNA Repair & Recombination
Eukaryote	0.0408569	9	649	3.96628	GO:0006281	DNA repair	EYA1,BRCA2,MUS81,SLF1,TAF6L,SGF29,FMR1,TTC5,CIB1	-	DNA Repair & Recombination
Metazoa	0.1652	2	214	4.54981	GO:0042770	signal transduction in response to DNA damage	ATRIP,BCL3	-	DNA Repair & Recombination
Cell_org	0.173976	9	254	2.16198	GO:0007160	cell-matrix adhesion	MACF1,RAC1,DAPK3,TESK2,PTPRA,SNED1,CDK5,NPNT,PTEN	-	Membrane Fusion & Adhesion
Metazoa	0.0858541	4	385	5.05797	GO:0031589	cell-substrate adhesion	NID2,FBLN2,WNT4,RSU1	-	Membrane Fusion & Adhesion
Cell_org	0.178231	12	385	1.9018	GO:0031589	cell-substrate adhesion	USH2A,MACF1,RAC1,DAPK3,TESK2,PTPRA,SNED1,CDK5,NPNT,GAS6,EGFL6,PTEN	-	Membrane Fusion & Adhesion
Metazoa	0.141192	2	172	5.66081	GO:0007156	homophilic cell adhesion via plasma membrane adhesion molecules	HMCN1,ROBO3	-	Membrane Fusion & Adhesion
Metazoa	0.104519	3	293	4.98461	GO:0098742	cell-cell adhesion via plasma-membrane adhesion molecules	HMCN1,ROBO3,TGFB2	-	Membrane Fusion & Adhesion
Cell_org	0.113297	3	28	6.53743	GO:0099560	synaptic membrane adhesion	PTPRS,PTPRF,PTPRD	-	Membrane Fusion & Adhesion
Cell_org	0.114905	41	1729	1.44688	GO:0007155	cell adhesion	USH2A,SDK2,PTPRS,MACF1,POSTN,PTPRF,HMCN1,SDK1,CNTN5,PTPRD,FAT3,FAT4,RAC1,DAPK3,KAT5,EPHB4,ADA,FARP2,AP3D1,LRP6,TESK2,STK10,RIPK2,PTPRA,HMCN2,FREM2,NLRP3,SNED1,CDK5,SVEP1,NPNT,PTEN,EGFL7,GAS6,LMLN,EGFL6,KIFC3,EGFR,NOD2,CSK,ARF6	AP3D1	Membrane Fusion & Adhesion
Metazoa	0.0377702	11	1729	3.09724	GO:0007155	cell adhesion	NID2,DLG4,HMCN1,BOC,ROBO3,FBLN2,TGFB2,EPHA4,WNT4,SVEP1,RSU1	-	Membrane Fusion & Adhesion
Cell_org	0.178231	12	385	1.9018	GO:0031589	cell-substrate adhesion	USH2A,MACF1,RAC1,DAPK3,TESK2,PTPRA,SNED1,CDK5,NPNT,GAS6,EGFL6,PTEN	-	Membrane Fusion & Adhesion
Cell_org	0.118496	4	54	4.5197	GO:0033028	myeloid cell apoptotic process	ARF6,NOD2,PTEN,GAS6	-	Membrane Fusion & Adhesion
Metazoa	0.0858541	5	600	4.05691	GO:0045785	positive regulation of cell adhesion	FBLN2,TGFB2,WNT4,EPHA4,RSU1	-	Membrane Fusion & Adhesion
Metazoa	0.0916754	1	6	81.1383	GO:0061343	cell adhesion involved in heart morphogenesis	TGFB2	-	Membrane Fusion & Adhesion
Metazoa	0.110657	6	1104	2.64581	GO:0098609	cell-cell adhesion	DLG4,HMCN1,BOC,ROBO3,WNT4,TGFB2	-	Membrane Fusion & Adhesion
Metazoa	0.131977	5	927	2.62583	GO:0030155	regulation of cell adhesion	FBLN2,TGFB2,WNT4,EPHA4,RSU1	-	Membrane Fusion & Adhesion
Metazoa	0.130816	1	20	24.3415	GO:0043046	DNA methylation involved in gamete generation	ASZ1	-	Reproductive process
Eukaryote	0.198392	1	9	31.7792	GO:0002176	male germ cell proliferation	CIB1	-	Reproductive process
Metazoa	0.0843865	1	3	162.277	GO:0002266	follicular dendritic cell activation	BCL3	-	Reproductive process
Metazoa	0.113959	1	14	34.7736	GO:0002467	germinal center formation	BCL3	-	Reproductive process
Cell_org	0.161868	2	14	8.71657	GO:0002467	germinal center formation	BCL3,ADA	-	Reproductive process
Eukaryote	0.190702	1	7	40.8589	GO:1905936	regulation of germ cell proliferation	CIB1	-	Reproductive process
Eukaryote	0.180537	1	6	47.6688	GO:2000254	regulation of male germ cell proliferation	CIB1	-	Reproductive process
Cell_org	0.0886815	2	8	15.254	GO:0060179	male mating behavior	HDAC4,PTEN	-	Reproductive process
Metazoa	0.105125	6	1081	2.70211	GO:0003006	developmental process involved in reproduction	ASZ1,WNT4,LRRK2,FSIP2,TGFB2,CASP8	-	Reproductive process
Metazoa	0.135496	1	22	22.1286	GO:0007530	sex determination	WNT4	-	Reproductive process
Metazoa	0.112161	13	3615	1.7507	GO:0023051	regulation of signaling	TGFB2,LRRK2,EPHA4,ADRB2,TTC23,RECK,DLG4,FZD1,WNT4,DAPK1,CASP8,BCL3,BCAR3	-	Reproductive process
Metazoa	0.166185	2	215	4.52865	GO:0044703	multi-organism reproductive process	RECK,WNT4	-	Reproductive process
Metazoa	0.145706	1	27	18.0307	GO:0060706	cell differentiation involved in embryonic placenta development	CASP8	-	Reproductive process
Metazoa	0.0924947	1	7	69.5471	GO:0060745	mammary gland branching involved in pregnancy	WNT4	-	Reproductive process
Metazoa	0.0916754	1	6	81.1383	GO:0061205	paramesonephric duct development	WNT4	-	Reproductive process
Metazoa	0.1652	1	36	13.523	GO:0120316	sperm flagellum assembly	FSIP2	-	Reproductive process
Metazoa	0.141335	7	1644	2.07288	GO:0000003	reproduction	RECK,ASZ1,WNT4,LRRK2,FSIP2,TGFB2,CASP8	-	Reproductive process
Metazoa	0.111874	5	827	2.94335	GO:0000165	MAPK cascade	LRRK2,TGFB2,EPHA4,ADRB2,BCAR3	-	Reproductive process
Cell_org	0.10957	23	827	1.69694	GO:0000165	MAPK cascade	FAS,FGFR3,TRAF4,TRAF5,TRAF2,TRAF3,LRRK2,EGFR,RYK,NOD2,ERN1,GAS6,DHX33,ROS1,CSK,RIPK2,ASH1L,NPNT,ALK,PTEN,IRAK4,MADD,NTRK2	-	Reproductive process
Metazoa	0.0840698	6	753	3.87912	GO:0000904	cell morphogenesis involved in differentiation	EPHA4,BOC,ROBO3,LRRK2,DLG4,RAPH1	-	Reproductive process
Cell_org	0.0885988	22	753	1.78267	GO:0000904	cell morphogenesis involved in differentiation	USH2A,NEDD4,ULK2,RAC1,CNTN5,RYK,CDK5,ULK1,LRRK2,EPHB4,MET,MACF1,SPAST,TOP2B,PTPRS,ECE1,PTPRQ,PTPRD,FAT3,RAB8A,PTEN,NTRK2	-	Reproductive process
Metazoa	0.147109	1	28	17.3868	GO:0007288	sperm axoneme assembly	FSIP2	-	Reproductive process
Metazoa	0.127679	2	148	6.57878	GO:0008584	male gonad development	WNT4,TGFB2	-	Reproductive process
Metazoa	0.0954469	4	473	4.11695	GO:0016055	Wnt signaling pathway	FZD1,WNT4,LRRK2,RECK	-	Reproductive process
Cell_org	0.11876	15	473	1.93497	GO:0016055	Wnt signaling pathway	LRP6,LRRK1,LRRK2,CDK14,INVS,PTEN,RECK,MACF1,RYK,SENP2,ROR1,MITF,EGFR,DAPK3,RAC1	-	Reproductive process
Metazoa	0.173371	2	228	4.27044	GO:1903046	meiotic cell cycle process	ASZ1,WNT4	-	Reproductive process
Metazoa	0.157093	3	443	3.29682	GO:0022412	cellular process involved in reproduction in multicellular organism	ASZ1,WNT4,FSIP2	-	Reproductive process
Metazoa	0.140263	5	965	2.52243	GO:0032504	multicellular organism reproduction	ASZ1,WNT4,LRRK2,FSIP2,TGFB2	-	Reproductive process
Metazoa	0.128841	2	149	6.53463	GO:0046546	development of primary male sexual characteristics	WNT4,TGFB2	-	Reproductive process
Metazoa	0.140481	2	171	5.69392	GO:0046661	male sex differentiation	WNT4,TGFB2	-	Reproductive process
Metazoa	0.160022	3	451	3.23834	GO:0048608	reproductive structure development	WNT4,TGFB2,CASP8	-	Reproductive process
Metazoa	0.135257	5	941	2.58677	GO:0048609	multicellular organismal reproductive process	ASZ1,WNT4,LRRK2,FSIP2,TGFB2	-	Reproductive process
Metazoa	0.161422	3	455	3.20987	GO:0061458	reproductive system development	WNT4,TGFB2,CASP8	-	Reproductive process
Metazoa	0.11115	1	13	37.4484	GO:1905939	regulation of gonad development	WNT4	-	Reproductive process
Metazoa	0.0858541	1	4	121.707	GO:1905940	negative regulation of gonad development	WNT4	-	Reproductive process
Metazoa	0.0979283	1	9	54.0922	GO:2000018	regulation of male gonad development	WNT4	-	Reproductive process
Metazoa	0.0858541	4	373	5.22069	GO:0001655	urogenital system development	EPHA4,WNT4,LRRK2,TGFB2	-	Reproductive process
Eukaryote	0.0995606	6	411	4.17536	GO:0001701	in utero embryonic development	EPN1,MIB1,CNOT1,BRCA2,TRAF6,GRB2	-	Reproductive process
Metazoa	0.135496	1	22	22.1286	GO:0006700	C21-steroid hormone biosynthetic process	WNT4	-	Reproductive process
Metazoa	0.100301	1	10	48.683	GO:0006702	androgen biosynthetic process	WNT4	-	Reproductive process
Metazoa	0.135496	1	22	22.1286	GO:0006704	glucocorticoid biosynthetic process	WNT4	-	Reproductive process
Metazoa	0.121733	1	17	28.637	GO:0006705	mineralocorticoid biosynthetic process	WNT4	-	Reproductive process
Metazoa	0.170267	1	39	12.4828	GO:0008207	C21-steroid hormone metabolic process	WNT4	-	Reproductive process
Metazoa	0.15358	1	30	16.2277	GO:0008209	androgen metabolic process	WNT4	-	Reproductive process
Metazoa	0.168817	1	38	12.8113	GO:0032570	response to progesterone	TGFB2	-	Reproductive process
Cell_org	0.178222	6	137	2.67223	GO:0032874	positive regulation of stress-activated MAPK cascade	TRAF4,TRAF5,TRAF2,TRAF3,NOD2,RIPK2	-	Reproductive process
Metazoa	0.154508	2	194	5.01886	GO:0043405	regulation of MAP kinase activity	LRRK2,EPHA4	-	Reproductive process
Metazoa	0.112027	2	124	7.85209	GO:0043406	positive regulation of MAP kinase activity	LRRK2,EPHA4	-	Reproductive process
Cell_org	0.140276	6	124	2.95239	GO:0043406	positive regulation of MAP kinase activity	LRRK2,TRAF2,EGFR,ERN1,CSK,NOD2	-	Reproductive process
Metazoa	0.0954469	5	719	3.38546	GO:0043408	regulation of MAPK cascade	LRRK2,TGFB2,EPHA4,ADRB2,BCAR3	-	Reproductive process
Cell_org	0.0645354	22	719	1.86697	GO:0043408	regulation of MAPK cascade	FAS,FGFR3,TRAF4,TRAF5,TRAF2,TRAF3,LRRK2,EGFR,RYK,NOD2,ERN1,GAS6,DHX33,ROS1,CSK,RIPK2,ASH1L,NPNT,ALK,PTEN,MADD,NTRK2	-	Reproductive process
Metazoa	0.0842972	5	528	4.61013	GO:0043410	positive regulation of MAPK cascade	LRRK2,TGFB2,ADRB2,EPHA4,BCAR3	-	Reproductive process
Cell_org	0.03021	19	528	2.19565	GO:0043410	positive regulation of MAPK cascade	FGFR3,TRAF4,TRAF5,TRAF2,TRAF3,LRRK2,EGFR,RYK,NOD2,ERN1,GAS6,DHX33,CSK,RIPK2,NPNT,ALK,PTEN,MADD,NTRK2	-	Reproductive process
Metazoa	0.0924947	1	7	69.5471	GO:0061370	testosterone biosynthetic process	WNT4	-	Reproductive process
Metazoa	0.121733	2	139	7.00475	GO:2000027	regulation of animal organ morphogenesis	FZD1,WNT4	-	Reproductive process
Metazoa	0.0924947	1	7	69.5471	GO:2000064	regulation of cortisol biosynthetic process	WNT4	-	Reproductive process
Metazoa	0.0843865	1	3	162.277	GO:2000224	regulation of testosterone biosynthetic process	WNT4	-	Reproductive process
Eukaryote	0.0408569	18	2160	2.38344	GO:0033554	cellular response to stress	FMR1,EYA1,KPTN,BRCA2,MUS81,TRAF6,SLF1,TAF6L,SGF29,SCAP,RIPK1,CIB1,TTC5,NBR1,CCNK,GRB2,DAPK1,SZT2	CCNK	Stress resoonse
Cell_org	0.0223796	42	1529	1.67604	GO:0080134	regulation of response to stress	FAS,TRAF4,TRAF5,TRAF2,TRAF3,RTEL1,NLRP1,TTI1,KAT2A,FCN2,NOD2,KAT5,SGF29,RAD52,WDR48,FOXP1,EGFR,DDAH1,UBE2N,XRCC6,RIPK2,PTPRS,ASH1L,ZNFX1,PTPRF,GBP5,NLRP3,HELQ,PTEN,TBK1,LRRK2,ADA,SHPK,LRIG2,PNKP,MET,PCNA,POGZ,ERN1,ING2,PLCG1,FURIN	KAT5	Stress resoonse
Cell_org	0.0203239	10	174	3.50667	GO:0009267	cellular response to starvation	NPRL2,XPR1,WRN,KAT5,EHMT2,PCSK9,GAS6,FAS,TBL2,LRRK2	TBL2	Stress resoonse
Cell_org	0.0131682	20	513	2.37879	GO:0009991	response to extracellular stimulus	ULK2,NPRL2,XPR1,ULK1,SNW1,DCPS,POSTN,WRN,KAT5,GAS6,EHMT2,ARSA,KAT2A,ABCG5,NOD2,PCSK9,FAS,TBL2,KYNU,LRRK2	TBL2	Stress resoonse
Cell_org	0.0073895	20	481	2.53705	GO:0031667	response to nutrient levels	ULK2,NPRL2,XPR1,ULK1,SNW1,DCPS,POSTN,WRN,KAT5,GAS6,EHMT2,ARSA,KAT2A,ABCG5,NOD2,PCSK9,FAS,TBL2,KYNU,LRRK2	TBL2	Stress resoonse
Cell_org	0.00679255	14	263	3.248	GO:0031668	cellular response to extracellular stimulus	NPRL2,XPR1,SNW1,DCPS,POSTN,WRN,KAT5,GAS6,EHMT2,PCSK9,FAS,TBL2,LRRK2,ULK1	TBL2	Stress resoonse
Cell_org	0.00250416	14	231	3.69794	GO:0031669	cellular response to nutrient levels	NPRL2,XPR1,SNW1,DCPS,POSTN,WRN,KAT5,GAS6,EHMT2,PCSK9,FAS,TBL2,LRRK2,ULK1	TBL2	Stress resoonse
Cell_org	0.00953456	12	212	3.45374	GO:0042594	response to starvation	ULK2,NPRL2,XPR1,ULK1,WRN,KAT5,EHMT2,PCSK9,GAS6,FAS,TBL2,LRRK2	TBL2	Stress resoonse
Cell_org	0.0151395	15	332	2.75675	GO:0071496	cellular response to external stimulus	NPRL2,XPR1,SNW1,DCPS,POSTN,WRN,KAT5,GAS6,EHMT2,HDAC4,PCSK9,FAS,TBL2,LRRK2,ULK1	TBL2	Stress resoonse
Cell_org	0.00339405	104	4424	1.43437	GO:0006950	response to stress	RAD52,FAS,PNKP,MCM2,MCM6,TRAF4,TRAF5,ULK2,MSH2,RIPK2,TBL2,RFC5,NPRL2,WDR48,MCM8,TRAF2,MACF1,PARP2,TRAF3,PCNA,REV1,MYOF,XPR1,GBP5,CUL4B,FCN2,CLPB,GBP4,RAD21,WRN,MCM7,NOD2,ULK1,UBE2N,ERN1,DMBT1,XRCC6,BLM,FAN1,RTEL1,NLRP1,TTI1,KAT2A,VPS4B,KAT5,SGF29,TBK1,BCL3,TRPA1,DHX15,FOXP1,KYNU,UFC1,ARNT,EGFR,ITPR1,DDAH1,HELQ,DAPK3,LRRK2,ADA,EHMT2,ITIH4,ATRX,PTPRS,ASH1L,ADPRS,ZNFX1,RAB2B,PIF1,PTPRF,POGZ,PXDNL,DG…	RFC5	Stress resoonse
Cell_org	0.122255	15	476	1.92277	GO:0006979	response to oxidative stress	RAD52,PNKP,TRPA1,ARNT,WRN,FOXP1,ADPRS,PCNA,PXDNL,OXSR1,ERN1,MET,EGFR,LRRK2,AGAP3	OXSR1	Stress resoonse
Cell_org	0.057547	14	369	2.31497	GO:0062197	cellular response to chemical stress	RAD52,TRPA1,ARNT,FOXP1,ADPRS,PCNA,OXSR1,ERN1,FAS,MET,EGFR,LRRK2,WNK3,AGAP3	OXSR1	Stress resoonse
Metazoa	0.168817	3	476	3.06825	GO:0006979	response to oxidative stress	FZD1,LRRK2,DAPK1	-	Stress resoonse
Cell_org	0.15352	8	203	2.40457	GO:0032872	regulation of stress-activated MAPK cascade	FAS,TRAF4,TRAF5,TRAF2,TRAF3,NOD2,RIPK2,EGFR	-	Stress resoonse
Metazoa	0.0916754	10	2160	2.25384	GO:0033554	cellular response to stress	BRAT1,ATRIP,SLF1,BCL3,TGFB2,LRRK2,EPHA4,FZD1,WNT4,DAPK1	-	Stress resoonse
Metazoa	0.112027	3	315	4.63647	GO:0034599	cellular response to oxidative stress	FZD1,LRRK2,DAPK1	-	Stress resoonse
Metazoa	0.0916754	8	1529	2.54718	GO:0080134	regulation of response to stress	ATRIP,TGFB2,SLF1,EPHA4,FZD1,WNT4,LRRK2,CASP8	-	Stress resoonse
Metazoa	0.0979283	2	98	9.9353	GO:1900407	regulation of cellular response to oxidative stress	FZD1,LRRK2	-	Stress resoonse
Eukaryote	0.176601	6	601	2.85537	GO:0010608	post-transcriptional regulation of gene expression	FMR1,CNOT1,ELP4,PCBP4,RIPK1,DAPK1	-	Transcriptional regulation
Cell_org	0.0102071	13	248	3.19842	GO:0006364	rRNA processing	RRP12,RIOK2,WDR3,RRP15,MDN1,NSUN5,NAT10,WDR12,HELQ,NSA2,DDX52,UTP20,MRM2	WDR3	Transcriptional regulation
Cell_org	0.0265597	13	288	2.75419	GO:0016072	rRNA metabolic process	RRP12,RIOK2,WDR3,RRP15,MDN1,NSUN5,NAT10,WDR12,HELQ,NSA2,DDX52,UTP20,MRM2	WDR3	Transcriptional regulation
Cell_org	0.0703919	17	509	2.03786	GO:0022613	ribonucleoprotein complex biogenesis	RRP12,RIOK2,WDR3,RRP15,MDN1,NSUN5,ERAL1,NAT10,WDR12,NOM1,HELQ,NSA2,DDX52,UTP20,MRM2,CUL4B,PTEN	WDR3	Transcriptional regulation
Cell_org	0.0572577	5	61	5.00131	GO:0030490	maturation of SSU-rRNA	RIOK2,WDR3,NAT10,DDX52,UTP20	WDR3	Transcriptional regulation
Cell_org	0.0850735	16	483	2.02123	GO:0034470	ncRNA processing	NSUN2,RRP12,RIOK2,WDR3,RRP15,MDN1,NSUN5,NAT10,WDR12,HELQ,NSA2,DDX52,TRMO,UTP20,MRM2,EGFR	WDR3	Transcriptional regulation
Cell_org	0.160306	18	645	1.70277	GO:0034660	ncRNA metabolic process	NSUN2,RRP12,RIOK2,WDR3,RRP15,MDN1,NSUN5,NAT10,WDR12,MEPCE,HELQ,NSA2,DDX52,TRMO,ATRX,UTP20,MRM2,EGFR	WDR3	Transcriptional regulation
Cell_org	0.0025715	17	327	3.17209	GO:0042254	ribosome biogenesis	RRP12,RIOK2,WDR3,RRP15,MDN1,NSUN5,ERAL1,NAT10,WDR12,NOM1,HELQ,NSA2,DDX52,UTP20,MRM2,CUL4B,PTEN	WDR3	Transcriptional regulation
Cell_org	0.0191335	7	87	4.90933	GO:0042274	ribosomal small subunit biogenesis	RIOK2,WDR3,ERAL1,NAT10,NOM1,DDX52,UTP20	WDR3	Transcriptional regulation
Cell_org	0.000148841	96	3630	1.61365	GO:0044085	cellular component biogenesis	RRP12,RIOK2,WDR3,RRP15,SDK2,ULK2,ASAP3,COG4,MDN1,HELLS,ZNFX1,MACF1,HIP1,NSUN5,ERAL1,CEP20,NAT10,RAC1,WDR12,FGD4,MIEN1,SDK1,NOM1,OXA1L,DRC1,WDR90,HELQ,NSA2,RAD21,CKAP5,ULK1,FLII,LRRK2,RTEL1,DDX52,AP3D1,VPS4B,VPS16,DHX33,SPAST,ATRX,NLRP1,TRPA1,GRWD1,MET,ABCA2,KAT2A,UGDH,RAB32,CENPE,PTPRD,GBP5,ARF6,RAB8A,DAPK3,ITLN1,MITF,BLM,DCTN1,RAD52,FARP2,UBR2,HDAC4,TESK2,MCM2,PTPRS,CDC20,UTP20,MRM2,TRAF2,MYO1B,…	WDR3	Transcriptional regulation
Cell_org	0.13863	28	1110	1.53914	GO:0010629	negative regulation of gene expression	DCPS,HELLS,ZNFX1,HELZ2,DHX34,CNOT9,HELZ,TTC37,LRRK2,FOXP1,RAC1,DAPK3,KAT5,GAS6,UBR2,ROS1,BCL3,TRAF5,CSK,TRAF2,NOD2,TBK1,PTPRS,ANXA7,FURIN,EGFR,KMT2D,ERN1	KAT5	Transcriptional regulation
Metazoa	0.130816	5	922	2.64007	GO:0001817	regulation of cytokine production	TGFB2,BCL3,TUSC2,LRRK2,CASP8	-	Transcriptional regulation
Metazoa	0.0858541	7	1110	3.0701	GO:0010629	negative regulation of gene expression	LRRK2,TGFB2,WNT4,DAPK1,BCL3,TUSC2,ASZ1	-	Transcriptional regulation
Metazoa	0.135496	7	1602	2.12722	GO:0016477	cell migration	TGFB2,EPHA4,WNT4,LDB2,BRAT1,RECK,LRRK2	-	Transcriptional regulation
Eukaryote	0.046871	5	193	7.40965	GO:0043484	regulation of RNA splicing	PCBP4,FMR1,HNRNPF,TAF6L,SGF29	-	Transcriptional regulation
Eukaryote	0.170575	2	53	10.7929	GO:0060147	regulation of post-transcriptional gene silencing	FMR1,RIPK1	-	Transcriptional regulation
Eukaryote	0.170575	2	53	10.7929	GO:0060966	regulation of gene silencing by RNA	FMR1,RIPK1	-	Transcriptional regulation
Eukaryote	0.123512	4	196	5.83699	GO:0061013	regulation of mRNA catabolic process	FMR1,CNOT1,PCBP4,TTC5	-	Transcriptional regulation
Eukaryote	0.170575	23	4112	1.59978	GO:0051252	regulation of RNA metabolic process	CCNK,PCBP4,FMR1,GLI1,TFDP2,CNOT1,BRCA2,HNRNPF,HCFC1,TRAF6,PCBP3,TEAD1,ZBED1,TAF6L,SGF29,ELP4,RIPK1,EYA1,DLL4,TTC5,CENPJ,CIB1,PIM2	CCNK	Transcriptional regulation
Eukaryote	0.0792182	15	1825	2.35079	GO:0045893	positive regulation of transcription DNA-templated	CCNK,TAF6L,HCFC1,SGF29,GLI1,TFDP2,RIPK1,BRCA2,TRAF6,TEAD1,ZBED1,EYA1,TTC5,CENPJ,PIM2	CCNK	Transcriptional regulation
Eukaryote	0.0743122	23	3403	1.93308	GO:0051173	positive regulation of nitrogen compound metabolic process	CCNK,FMR1,EYA1,CNOT1,TAF6L,HCFC1,SGF29,GLI1,TFDP2,C4BPA,SLF1,RIPK1,BRCA2,TRAF6,TEAD1,DAPK1,ZBED1,TTC5,CENPJ,SYAP1,CIB1,COP1,PIM2	CCNK	Transcriptional regulation
Cell_org	0.0703919	3	21	8.71657	GO:0000083	regulation of transcription involved in G1/S transition of mitotic cell cycle	CDK14,CDK5,ZPR1	-	Transcriptional regulation
Metazoa	0.121733	1	17	28.637	GO:0000463	maturation of LSU-rRNA from tricistronic rRNA transcript (SSU-rRNA 5.8S rRNA LSU-rRNA)	WDR12	-	Transcriptional regulation
Metazoa	0.145706	1	27	18.0307	GO:0000466	maturation of 5.8S rRNA from tricistronic rRNA transcript (SSU-rRNA 5.8S rRNA LSU-rRNA)	WDR12	-	Transcriptional regulation
Eukaryote	0.145891	3	112	7.66105	GO:0016441	post-transcriptional gene silencing	FMR1,CNOT1,RIPK1	-	Transcriptional regulation
Eukaryote	0.129251	3	105	8.17179	GO:0035194	post-transcriptional gene silencing by RNA	FMR1,CNOT1,RIPK1	-	Transcriptional regulation
Metazoa	0.0858541	8	1431	2.72162	GO:0045892	negative regulation of transcription DNA-templated	LDB2,BCL3,ETS2,GON4L,FZD1,SIM2,WNT4,HCFC1	-	Transcriptional regulation
Metazoa	0.118799	8	1825	2.13405	GO:0045893	positive regulation of transcription DNA-templated	BCL3,LDB2,HCFC1,TGFB2,FZD1,ETS2,WNT4,ADRB2	-	Transcriptional regulation
Cell_org	0.169605	15	514	1.78062	GO:0051090	regulation of DNA-binding transcription factor activity	LRP6,TRAF5,TRAF2,TRAF3,BCL3,RIPK2,TAF3,NOD2,GAS6,DHX33,HDAC4,PTEN,UBE2N,ROR1,ALK	-	Transcriptional regulation
Metazoa	0.0858541	8	1433	2.71782	GO:1903507	negative regulation of nucleic acid-templated transcription	LDB2,BCL3,ETS2,GON4L,FZD1,SIM2,WNT4,HCFC1	-	Transcriptional regulation
Eukaryote	0.0792182	15	1825	2.35079	GO:1903508	positive regulation of nucleic acid-templated transcription	CCNK,TAF6L,HCFC1,SGF29,GLI1,TFDP2,RIPK1,BRCA2,TRAF6,TEAD1,ZBED1,EYA1,TTC5,CENPJ,PIM2	CCNK	Transcriptional regulation
Cell_org	0.172118	3	38	4.81705	GO:0042092	type 2 immune response	BCL3,NLRP3,NOD2	-
Metazoa	0.0843865	1	3	162.277	GO:0006409	tRNA export from nucleus	XPOT	XPOT
Metazoa	0.125684	3	354	4.12568	GO:0006913	nucleocytoplasmic transport	XPOT,BCL3,LRRK2	XPOT
Cell_org	0.131576	12	354	2.06834	GO:0006913	nucleocytoplasmic transport	ZPR1,XPO6,XPOT,IPO7,NSUN2,BCL3,NEDD4,GAS6,CDK5,LRRK2,IFI27,RIOK2	XPOT
Metazoa	0.130816	10	2642	1.84266	GO:0008104	protein localization	DLG4,SAV1,MTBP,LRRK2,BCL3,TGFB2,SLF1,SYTL5,XPOT,FSIP2	XPOT
Metazoa	0.0884421	9	1782	2.45874	GO:0034613	cellular protein localization	DLG4,SAV1,MTBP,LRRK2,BCL3,SLF1,SYTL5,XPOT,FSIP2	XPOT
Metazoa	0.0916754	1	6	81.1383	GO:0051031	tRNA transport	XPOT	XPOT
Cell_org	0.186795	7	179	2.3861	GO:0051168	nuclear export	XPO6,XPOT,NSUN2,GAS6,CDK5,IFI27,RIOK2	XPOT
Metazoa	0.125684	3	354	4.12568	GO:0051169	nuclear transport	XPOT,BCL3,LRRK2	XPOT
Cell_org	0.131576	12	354	2.06834	GO:0051169	nuclear transport	ZPR1,XPO6,XPOT,IPO7,NSUN2,BCL3,NEDD4,GAS6,CDK5,LRRK2,IFI27,RIOK2	XPOT
Metazoa	0.102779	12	3120	1.87242	GO:0051641	cellular localization	DLG4,SAV1,MTBP,XPOT,LRRK2,BCL3,SLF1,SYTL5,BBS12,BRAT1,FSIP2,ADRB2	XPOT
Metazoa	0.0884421	9	1791	2.44638	GO:0070727	cellular macromolecule localization	DLG4,SAV1,MTBP,LRRK2,BCL3,SLF1,SYTL5,XPOT,FSIP2	XPOT
Metazoa	0.0979283	1	9	54.0922	GO:0097064	ncRNA export from nucleus	XPOT	XPOT
Cell_org	0.179605	95	4823	1.20185	GO:0006810	transport	LMAN1,SEC63,AP3D1,ABCC9,NEDD4,LRP6,AP4E1,HEPH,COG4,MET,RIC1,ABCA2,ZPR1,AAK1,SCP2,KIF17,RAB32,COPA,HIP1,MYO1B,MYO5C,ABCB7,TRPC4,RAC1,VPS53,XPR1,SNX27,LIN7C,RAB6B,OXA1L,ABCG1,CDK5,ARF6,RAB8A,XPO6,XPOT,LRRK2,WNK3,DCTN1,IPO7,VPS16,MRC1,ABCG2,VPS4B,ABCG5,RYR2,NSUN2,BCL3,GGA1,CSK,MACF1,CSN2,PCSK6,FURIN,EGFR,FCN2,PCSK9,ITLN1,GAS6,ASPH,MVP,SPAST,ROS1,ITPR3,TRIP4,TRPA1,RAB2A,TRIM3,RAB2B,YIPF2,FRAS1,NTRK2,…	AP3D1
Cell_org	0.0364325	28	934	1.82917	GO:0006886	intracellular protein transport	LMAN1,SEC63,AP3D1,RIC1,ZPR1,RAB32,COPA,SNX27,RAB6B,OXA1L,ARF6,XPO6,IPO7,AP4E1,LRRK2,BCL3,GGA1,GAS6,ASPH,VPS11,CDK5,RAB8A,XPOT,VPS16,IFI27,HACL1,NEDD4,FUT10	AP3D1
Cell_org	0.104294	8	178	2.74229	GO:0007034	vacuolar transport	AP3D1,VPS4B,NEDD4,PCSK9,SNX27,VPS53,VPS16,LRRK2	AP3D1
Cell_org	0.0428691	8	139	3.51171	GO:0007041	lysosomal transport	AP3D1,VPS4B,NEDD4,PCSK9,SNX27,VPS53,VPS16,LRRK2	AP3D1
Cell_org	0.114905	41	1729	1.44688	GO:0007155	cell adhesion	USH2A,SDK2,PTPRS,MACF1,POSTN,PTPRF,HMCN1,SDK1,CNTN5,PTPRD,FAT3,FAT4,RAC1,DAPK3,KAT5,EPHB4,ADA,FARP2,AP3D1,LRP6,TESK2,STK10,RIPK2,PTPRA,HMCN2,FREM2,NLRP3,SNED1,CDK5,SVEP1,NPNT,PTEN,EGFL7,GAS6,LMLN,EGFL6,KIFC3,EGFR,NOD2,CSK,ARF6	AP3D1
Cell_org	0.008577	67	2642	1.54734	GO:0008104	protein localization	LMAN1,SEC63,AP3D1,PIGU,RIC1,ZPR1,RAB32,COPA,SNX27,LIN7C,RAB6B,OXA1L,ARF6,RAB8A,XPO6,LRRK2,IPO7,AP4E1,BCL3,GGA1,CSK,AAK1,SCP2,MACF1,EGFR,MEPCE,GBP5,ABCG1,WRN,TAF3,GAS6,WNK3,ASPH,RYR2,MVP,USH2A,ATRX,COG4,RAB2A,TRIM3,KIF17,VPS4B,RAB2B,FRAS1,VPS53,VPS11,SENP2,CDK5,ATG4B,NPNT,XPOT,DMBT1,LRIG2,VPS16,IFI27,MSH2,MCM8,HACL1,RAD21,ULK1,NEDD4,LRP6,MUSK,ABCA2,FUT10,HIP1,SGF29	AP3D1
Cell_org	0.190467	4	71	3.43752	GO:0008333	endosome to lysosome transport	AP3D1,VPS4B,SNX27,VPS16	AP3D1
Cell_org	0.0476232	70	3073	1.38989	GO:0009605	response to external stimulus	ULK2,RIPK2,NPRL2,RAC1,XPR1,CNTN5,GBP5,FCN2,GBP4,NOD2,ULK1,DMBT1,EPHB4,SHPK,NLRP1,TRAF3,TBK1,BCL3,SNW1,MET,DHX15,DCPS,FOXP1,KYNU,POSTN,CLPB,WRN,DAPK3,KAT5,GAS6,XRCC6,EHMT2,HDAC4,TRAF4,ARSA,TRPA1,PTPRS,KAT2A,ASH1L,ECE1,ZNFX1,RAB2B,ABCG5,PTPRQ,PTPRF,HMCN1,NLRP3,RYK,CDK5,IFI27,NPNT,PCSK9,ALK,PTEN,OXSR1,LRRK2,ADA,IRAK4,LRIG2,IPO7,MRC1,FAS,AP3D1,ABCC9,TBL2,RAB32,RYR2,ITLN1,PLCG1,FURIN	AP3D1
Cell_org	0.0232647	45	1680	1.63436	GO:0015031	protein transport	LMAN1,SEC63,AP3D1,RIC1,ZPR1,RAB32,COPA,SNX27,RAB6B,OXA1L,ARF6,RAB8A,XPO6,IPO7,AP4E1,LRRK2,BCL3,GGA1,CSK,MACF1,ABCG1,GAS6,ASPH,MVP,COG4,RAB2A,TRIM3,KIF17,VPS4B,RAB2B,FRAS1,VPS53,LIN7C,VPS11,SENP2,CDK5,ATG4B,XPOT,DMBT1,VPS16,IFI27,HACL1,NEDD4,FUT10,HIP1	AP3D1
Cell_org	0.0364325	44	1695	1.5839	GO:0016192	vesicle-mediated transport	AP3D1,NEDD4,LRP6,LMAN1,AP4E1,COG4,MET,RIC1,AAK1,COPA,HIP1,RAC1,VPS53,RAB6B,ARF6,RAB8A,LRRK2,VPS16,MRC1,VPS4B,GGA1,CSK,ABCA2,MACF1,EGFR,FCN2,PCSK9,GAS6,SPAST,RAB2A,KIF17,RAB32,RAB2B,YIPF2,SNX27,LIN7C,VPS11,CDK5,NOD2,PTEN,DMBT1,MYO1B,DCTN1,PLD2	AP3D1
Cell_org	0.0293578	12	257	2.849	GO:0016197	endosomal transport	AP3D1,RIC1,VPS53,RAB6B,LRRK2,VPS16,VPS4B,GGA1,ARF6,SNX27,RAB8A,DCTN1	AP3D1
Cell_org	0.135289	11	315	2.13072	GO:0021700	developmental maturation	RECK,FARP2,NSUN2,CDC20,NOM1,PTEN,FAT4,AP3D1,RAB32,LRRK2,FGFR3	AP3D1
Cell_org	0.0046454	83	3365	1.505	GO:0022607	cellular component assembly	SDK2,ULK2,ASAP3,COG4,MDN1,HELLS,ZNFX1,MACF1,HIP1,ERAL1,CEP20,RAC1,FGD4,MIEN1,SDK1,OXA1L,DRC1,WDR90,RAD21,CKAP5,ULK1,FLII,LRRK2,RTEL1,AP3D1,VPS4B,VPS16,DHX33,SPAST,ATRX,NLRP1,TRPA1,GRWD1,MET,KAT2A,UGDH,RAB32,CENPE,PTPRD,GBP5,ARF6,RAB8A,DAPK3,ITLN1,MITF,BLM,DCTN1,RAD52,FARP2,UBR2,HDAC4,TESK2,MCM2,PTPRS,CDC20,TRAF2,MYO1B,ABCB7,PTPRA,NTRK2,CNTN5,NEK7,NLRP3,CDK5,KIF27,PTEN,GAS6,THSD4,EHMT2,COX15,MRM2,…	AP3D1
Cell_org	0.115407	93	4552	1.24659	GO:0030154	cell differentiation	USH2A,NEDD4,ULK2,MET,ZPR1,RAC1,MYOF,EGFR,NTRK2,CNTN5,RYK,CDK5,ARF6,ALK,ULK1,FLII,ROR1,MITF,LRRK2,EPHB4,LRP6,ARNT,FARP2,FOXP1,MACF1,NELL1,KAT5,GAS6,SPAST,MUSK,NSUN2,TLL1,ROS1,CTDP1,AP3D1,HDAC4,SDK2,BCL3,TOP2B,ATRX,MSH2,CSK,HERC1,TRIP4,RIPK2,PTPRS,KAT2A,ECE1,CDC20,RECK,PIGT,HIP1,PARP2,NSUN5,TRPC4,PTPRQ,PTPRF,SDK1,HERC4,PTPRD,LRRK1,PLCL2,CUL4B,NLRP3,CSMD3,FAT3,SGPL1,RAB8A,BMP1,ING2,NPNT,PCSK9,PTEN,E…	AP3D1
Cell_org	0.0277345	73	3133	1.42169	GO:0033036	macromolecule localization	LMAN1,SEC63,AP3D1,LRP6,PIGU,RIC1,ABCA2,ZPR1,SCP2,RAB32,COPA,SNX27,LIN7C,RAB6B,OXA1L,ARF6,RAB8A,XPO6,XPOT,LRRK2,IPO7,AP4E1,ABCG5,NSUN2,BCL3,GGA1,CSK,AAK1,MACF1,EGFR,MEPCE,GBP5,ABCG1,WRN,TAF3,PCSK9,GAS6,WNK3,ASPH,RYR2,MVP,USH2A,ATRX,COG4,RAB2A,TRIM3,KIF17,ABCG2,VPS4B,RAB2B,FRAS1,FURIN,VPS53,VPS11,SENP2,CDK5,ATG4B,NPNT,DMBT1,LRIG2,VPS16,IFI27,MSH2,MCM8,HACL1,RAD21,ULK1,NEDD4,MUSK,CKAP5,FUT10,HIP1,SG…	AP3D1
Cell_org	0.00724197	50	1782	1.71201	GO:0034613	cellular protein localization	LMAN1,SEC63,AP3D1,PIGU,RIC1,ZPR1,RAB32,COPA,SNX27,LIN7C,RAB6B,OXA1L,ARF6,RAB8A,XPO6,LRRK2,IPO7,AP4E1,BCL3,GGA1,CSK,SCP2,MACF1,EGFR,MEPCE,GBP5,WRN,TAF3,GAS6,WNK3,ASPH,RYR2,ATRX,VPS11,CDK5,XPOT,LRIG2,VPS16,IFI27,MSH2,MCM8,HACL1,RAD21,ATG4B,NEDD4,LRP6,MUSK,ABCA2,FUT10,SGF29	AP3D1
Cell_org	0.114905	2	10	12.2032	GO:0035646	endosome to melanosome transport	AP3D1,RAB32	AP3D1
Cell_org	0.136674	2	12	10.1693	GO:0043476	pigment accumulation	AP3D1,RAB32	AP3D1
Cell_org	0.136674	2	12	10.1693	GO:0043482	cellular pigment accumulation	AP3D1,RAB32	AP3D1
Cell_org	0.114905	2	10	12.2032	GO:0043485	endosome to pigment granule transport	AP3D1,RAB32	AP3D1
Cell_org	0.00771979	50	1795	1.69961	GO:0045184	establishment of protein localization	LMAN1,SEC63,AP3D1,RIC1,ZPR1,RAB32,COPA,SNX27,RAB6B,OXA1L,ARF6,RAB8A,XPO6,IPO7,AP4E1,LRRK2,BCL3,GGA1,CSK,MACF1,ABCG1,GAS6,ASPH,RYR2,MVP,USH2A,COG4,RAB2A,TRIM3,KIF17,VPS4B,RAB2B,FRAS1,VPS53,LIN7C,VPS11,SENP2,CDK5,ATG4B,NPNT,XPOT,DMBT1,VPS16,IFI27,HACL1,NEDD4,FUT10,HIP1,EGFR,SGF29	AP3D1
Cell_org	0.118194	7	149	2.86652	GO:0045621	positive regulation of lymphocyte differentiation	KAT5,GAS6,AP3D1,RIPK2,NLRP3,ADA,XRCC6	AP3D1
Cell_org	0.136772	4	59	4.13668	GO:0046638	positive regulation of alpha-beta T cell differentiation	AP3D1,RIPK2,NLRP3,ADA	AP3D1
Cell_org	0.0581776	43	1709	1.53522	GO:0046907	intracellular transport	LMAN1,SEC63,AP3D1,LRP6,RIC1,ZPR1,SCP2,KIF17,RAB32,COPA,MYO1B,MYO5C,VPS53,SNX27,RAB6B,OXA1L,ARF6,XPO6,XPOT,LRRK2,DCTN1,IPO7,VPS16,AP4E1,VPS4B,NSUN2,BCL3,NEDD4,GGA1,ABCA2,PCSK9,GAS6,ASPH,SPAST,ABCG1,VPS11,CDK5,RAB8A,IFI27,RIOK2,HACL1,FUT10,RAB2A	AP3D1
Cell_org	0.0608382	13	333	2.38201	GO:0048193	Golgi vesicle transport	AP3D1,LMAN1,COG4,COPA,RAB6B,RAB8A,GGA1,CSK,MACF1,SPAST,LRRK2,MYO1B,RAB2A	AP3D1
Cell_org	0.190467	4	71	3.43752	GO:0048488	synaptic vesicle endocytosis	AP3D1,CDK5,ARF6,LRRK2	AP3D1
Cell_org	0.190934	3	41	4.46459	GO:0048489	synaptic vesicle transport	AP3D1,CDK5,LRRK2	AP3D1
Cell_org	0.114905	2	10	12.2032	GO:0048757	pigment granule maturation	AP3D1,RAB32	AP3D1
Cell_org	0.124118	93	4576	1.24005	GO:0048869	cellular developmental process	USH2A,NEDD4,ULK2,MET,ZPR1,RAC1,MYOF,EGFR,NTRK2,CNTN5,RYK,CDK5,ARF6,ALK,ULK1,FLII,ROR1,MITF,LRRK2,EPHB4,LRP6,ARNT,FARP2,FOXP1,MACF1,NELL1,KAT5,GAS6,SPAST,MUSK,NSUN2,TLL1,ROS1,CTDP1,AP3D1,HDAC4,SDK2,BCL3,TOP2B,ATRX,MSH2,CSK,HERC1,TRIP4,RIPK2,PTPRS,KAT2A,ECE1,CDC20,RECK,PIGT,HIP1,PARP2,NSUN5,TRPC4,PTPRQ,PTPRF,SDK1,HERC4,PTPRD,LRRK1,PLCL2,CUL4B,NLRP3,CSMD3,FAT3,SGPL1,RAB8A,BMP1,ING2,NPNT,PCSK9,PTEN,E…	AP3D1
Cell_org	0.166248	3	37	4.94724	GO:0050931	pigment cell differentiation	MITF,AP3D1,RAB32	AP3D1
Cell_org	0.11084	101	4987	1.23574	GO:0051234	establishment of localization	LMAN1,SEC63,AP3D1,ABCC9,NEDD4,LRP6,AP4E1,HEPH,COG4,MET,RIC1,ABCA2,ZPR1,AAK1,SCP2,KIF17,RAB32,COPA,HIP1,MYO1B,MYO5C,ABCB7,TRPC4,CCNB1,RAC1,VPS53,XPR1,SNX27,LIN7C,RAB6B,OXA1L,ABCG1,CDK5,ARF6,RAB8A,XPO6,XPOT,LRRK2,WNK3,DCTN1,IPO7,VPS16,MRC1,ABCG2,VPS4B,ABCG5,RYR2,NSUN2,BCL3,GGA1,CSK,MACF1,CSN2,CENPE,PCSK6,FURIN,EGFR,FCN2,PCSK9,KAT5,ITLN1,GAS6,ASPH,MVP,SPAST,USH2A,ROS1,ITPR3,TRIP4,TRPA1,RAB2A,TRIM3,R…	AP3D1
Cell_org	0.00989433	76	3120	1.48629	GO:0051641	cellular localization	LMAN1,SEC63,AP3D1,LRP6,PIGU,RIC1,ZPR1,SCP2,KIF17,RAB32,COPA,MYO1B,MYO5C,CCNB1,VPS53,SNX27,LIN7C,RAB6B,OXA1L,CDK5,ARF6,RAB8A,XPO6,MFN1,XPOT,LRRK2,DCTN1,IPO7,VPS16,AP4E1,VPS4B,RYR2,NSUN2,BCL3,NEDD4,GGA1,CSK,ABCA2,MACF1,CENPE,EGFR,MEPCE,GBP5,WRN,TAF3,PCSK9,KAT5,GAS6,WNK3,ASPH,SPAST,USH2A,ATRX,TRPA1,KAT2A,ITPR1,ABCG1,VPS11,KIF27,NOD2,PTEN,LRIG2,IFI27,RIOK2,MSH2,PLCG1,MCM8,HACL1,RAC1,RAD21,ATG4B,MUSK,…	AP3D1
Cell_org	0.18444	8	218	2.23912	GO:0051648	vesicle localization	AP3D1,MYO1B,MYO5C,CDK5,LRRK2,PTEN,DCTN1,VPS4B	AP3D1
Cell_org	0.0634146	56	2388	1.43086	GO:0051649	establishment of localization in cell	LMAN1,SEC63,AP3D1,LRP6,RIC1,ZPR1,SCP2,KIF17,RAB32,COPA,MYO1B,MYO5C,CCNB1,VPS53,SNX27,LIN7C,RAB6B,OXA1L,CDK5,ARF6,XPO6,XPOT,LRRK2,DCTN1,IPO7,VPS16,AP4E1,VPS4B,RYR2,NSUN2,BCL3,NEDD4,GGA1,ABCA2,CENPE,PCSK9,KAT5,GAS6,ASPH,SPAST,USH2A,TRPA1,ITPR1,ABCG1,VPS11,KIF27,NOD2,RAB8A,PTEN,IFI27,RIOK2,PLCG1,HACL1,FUT10,RAB2A,PLD2	AP3D1
Cell_org	0.133836	20	715	1.70674	GO:0051668	localization within membrane	SEC63,LIN7C,OXA1L,RAB8A,VPS53,GGA1,CSK,SCP2,MACF1,EGFR,ARF6,GAS6,WNK3,CDK5,AP3D1,RAB32,RAC1,SNX27,LRP6,MUSK	AP3D1
Cell_org	0.0073895	50	1791	1.70341	GO:0070727	cellular macromolecule localization	LMAN1,SEC63,AP3D1,PIGU,RIC1,ZPR1,RAB32,COPA,SNX27,LIN7C,RAB6B,OXA1L,ARF6,RAB8A,XPO6,LRRK2,IPO7,AP4E1,BCL3,GGA1,CSK,SCP2,MACF1,EGFR,MEPCE,GBP5,WRN,TAF3,GAS6,WNK3,ASPH,RYR2,ATRX,VPS11,CDK5,XPOT,LRIG2,VPS16,IFI27,MSH2,MCM8,HACL1,RAD21,ATG4B,NEDD4,LRP6,MUSK,ABCA2,FUT10,SGF29	AP3D1
Cell_org	0.0645354	28	994	1.71876	GO:0070925	organelle assembly	ULK2,MDN1,ERAL1,CEP20,DRC1,WDR90,ULK1,FLII,LRRK2,AP3D1,VPS4B,KAT2A,RAB32,CENPE,RAB8A,FARP2,PTPRS,CDC20,PTPRD,KIF27,PTEN,EHMT2,MRM2,POGZ,ATG4B,DCTN1,BBOF1,NEK7	AP3D1
Cell_org	0.0886815	59	2618	1.37507	GO:0071702	organic substance transport	LMAN1,SEC63,AP3D1,LRP6,RIC1,ABCA2,ZPR1,SCP2,RAB32,COPA,SNX27,RAB6B,OXA1L,ARF6,RAB8A,XPO6,XPOT,IPO7,AP4E1,ABCG5,LRRK2,NSUN2,BCL3,GGA1,CSK,ABCG2,MACF1,ABCG1,PCSK9,ITLN1,GAS6,ASPH,MVP,COG4,RAB2A,TRIM3,KIF17,VPS4B,RAB2B,ABCB7,TRPC4,FRAS1,FURIN,VPS53,NTRK2,LIN7C,VPS11,SENP2,CDK5,ATG4B,DMBT1,VPS16,IFI27,HACL1,NEDD4,AIMP1,CKAP5,FUT10,HIP1	AP3D1
Cell_org	0.0450333	53	2175	1.48683	GO:0071705	nitrogen compound transport	LMAN1,SEC63,AP3D1,RIC1,ZPR1,RAB32,COPA,SNX27,RAB6B,OXA1L,ARF6,RAB8A,XPO6,XPOT,IPO7,AP4E1,LRRK2,NSUN2,BCL3,GGA1,CSK,ABCA2,ABCG2,MACF1,ABCG1,GAS6,ASPH,MVP,COG4,RAB2A,TRIM3,KIF17,VPS4B,RAB2B,ABCB7,TRPC4,FRAS1,VPS53,NTRK2,LIN7C,VPS11,SENP2,CDK5,ATG4B,DMBT1,VPS16,IFI27,HACL1,NEDD4,AIMP1,CKAP5,FUT10,HIP1	AP3D1
Cell_org	0.193947	17	626	1.65698	GO:0072657	protein localization to membrane	SEC63,LIN7C,OXA1L,RAB8A,GGA1,CSK,SCP2,MACF1,EGFR,GAS6,WNK3,CDK5,ARF6,AP3D1,RAB32,LRP6,MUSK	AP3D1
Cell_org	0.118496	4	54	4.5197	GO:0097479	synaptic vesicle localization	AP3D1,CDK5,LRRK2,PTEN	AP3D1
Cell_org	0.0931199	3	25	7.32192	GO:0099637	neurotransmitter receptor transport	AP3D1,RAB8A,HIP1	AP3D1
Cell_org	0.00339405	24	589	2.48622	GO:0006914	autophagy	ULK2,NPRL2,ULK1,LRRK2,VPS4B,ATG4B,KAT5,TBK1,ARSA,HERC1,RIPK2,VPS11,NOD2,RAB8A,EHMT2,VPS16,ANXA7,UFC1,MET,NEDD4,ITPR1,CDK5,DAPK3,ERN1	VPS11
Cell_org	0.00339405	24	589	2.48622	GO:0061919	process utilizing autophagic mechanism	ULK2,NPRL2,ULK1,LRRK2,VPS4B,ATG4B,KAT5,TBK1,ARSA,HERC1,RIPK2,VPS11,NOD2,RAB8A,EHMT2,VPS16,ANXA7,UFC1,MET,NEDD4,ITPR1,CDK5,DAPK3,ERN1	VPS11
Cell_org	0.0209578	5	43	7.09488	GO:1901998	toxin transport	LRP6,GGA1,TRIP4,ABCG1,VPS11	VPS11
Eukaryote	0.190702	1	8	35.7516	GO:0021814	cell motility involved in cerebral cortex radial glia guided migration	SUN2	-
Cell_org	0.0482087	2	5	24.4064	GO:0007231	osmosensory signaling pathway	OXSR1,WNK3	OXSR1
Eukaryote	0.0916015	23	3615	1.81972	GO:0023051	regulation of signaling	VAPA,EYA1,KPTN,DLL4,SYAP1,TRAF6,LAMA1,BRCA2,CCNK,FMR1,GLI1,CNOT1,RIPK1,CENPJ,CIB1,SNX25,ARMC9,PTPRD,GRB2,NBR1,DAPK1,SZT2,PIM2	CCNK
Metazoa	0.162867	7	1777	1.91773	GO:0007267	cell-cell signaling	DLG4,FZD1,WNT4,LRRK2,EPHA4,RECK,ADRB2	-
Cell_org	0.0222866	83	3615	1.40092	GO:0023051	regulation of signaling	FAS,ROS1,FGFR3,TRAF4,TRAF5,CSK,RIPK2,MET,MADD,NPRL2,AAK1,TRAF2,TRAF3,NTRK2,DGKZ,LRRK1,NOD2,PTEN,ROR1,LRRK2,ADA,IRAK4,TTI1,HIP1,ARNT,ING2,MVP,CDK14,SNW1,PIGU,DHX15,FOXP1,INVS,EGFR,ITPR1,NEK8,RYK,ARF6,PCSK9,UBE2N,ERN1,GAS6,DHX33,ITPR3,PLCB4,PTPRS,KAT2A,ASH1L,CDC20,HELLS,RECK,PTPRA,POSTN,FURIN,RGS5,PTPRD,PLCL2,CDK5,RAB8A,NPNT,ALK,TBK1,LRIG2,BCL3,UBR2,NEDD4,BIRC6,ECE1,PLCG1,CCNB1,CNOT9,HERC4,SIK3,KMT…	-
Metazoa	0.0916754	9	1836	2.38642	GO:0023056	positive regulation of signaling	TGFB2,LRRK2,ADRB2,TTC23,EPHA4,RECK,DLG4,CASP8,BCAR3	-
Cell_org	0.0357051	47	1836	1.56196	GO:0023056	positive regulation of signaling	FGFR3,TRAF4,TRAF5,RIPK2,MET,AAK1,TRAF2,TRAF3,NTRK2,LRRK1,NOD2,ROR1,IRAK4,TTI1,HIP1,ARNT,LRRK2,SNW1,DHX15,EGFR,RYK,ING2,UBE2N,ERN1,GAS6,DHX33,ITPR3,CSK,RECK,CDK5,NPNT,ALK,PTEN,TBK1,ADA,FAS,NEDD4,MADD,FOXP1,ECE1,CNOT9,SIK3,KMT2D,DAPK3,MACF1,AIMP1,RAC1	-
Metazoa	0.0884421	8	1488	2.61736	GO:0023057	negative regulation of signaling	EPHA4,ADRB2,FZD1,WNT4,LRRK2,CASP8,BCL3,TGFB2	-
Eukaryote	0.170575	11	1488	2.11434	GO:0023057	negative regulation of signaling	EYA1,KPTN,DLL4,GLI1,CNOT1,SNX25,RIPK1,PTPRD,CIB1,SZT2,FMR1	-
Eukaryote	0.0916015	23	3615	1.81972	GO:0023051	regulation of signaling	VAPA,EYA1,KPTN,DLL4,SYAP1,TRAF6,LAMA1,BRCA2,CCNK,FMR1,GLI1,CNOT1,RIPK1,CENPJ,CIB1,SNX25,ARMC9,PTPRD,GRB2,NBR1,DAPK1,SZT2,PIM2	CCNK
Cell_org	0.150116	2	13	9.38708	GO:0018095	protein polyglutamylation	TTLL4,TTLL6	TTLL6
Cell_org	1.57135e-05	51	1375	2.26314	GO:0018193	peptidyl-amino acid modification	ULK2,KAT2A,DPH1,SENP5,P4HA1,DPH2,TTLL4,RPN1,SENP2,TPST1,TTLL6,SGF29,ULK1,TBK1,ASPH,KMT2D,KAT5,MVP,HDAC4,FGFR3,RIPK2,ASH1L,PARP2,MGAT1,EGFR,CDK5,ALK,OXSR1,ERN1,GAS6,LRRK2,WNK3,EHMT2,MUSK,ROS1,TESK2,CSK,MET,PPIL4,ARNT,NTRK2,LRRK1,RYK,NOD2,ROR1,EPHB4,ZBED1,ATRX,SNW1,CNOT9,PTEN	TTLL6
Cell_org	0.0895488	11	282	2.38006	GO:0032886	regulation of microtubule-based process	MACF1,DRC1,KAT2A,NAT10,CKAP5,DCTN1,SPAST,TTLL6,MET,VPS4B,RAC1	TTLL6
Cell_org	9.28213e-12	127	3952	1.96079	GO:0036211	protein modification process	UBR2,CUL1,CDK14,CTDP1,HDAC4,NEDD4,TRAF5,ULK2,PIGU,PTPRS,PIGL,KAT2A,DPH1,TRIM2,TRIM3,CUL9,WDR48,MOGS,AAK1,SENP5,P4HA1,WWP1,PIGT,TRAF2,PARP2,PPIL4,TRAF3,MGAT1,PTPRA,DPH2,CCNB1,TTLL4,CDKL2,TMTC3,PTPRF,UFC1,HERC4,UBC,PTPRD,CUL4B,SNRK,RPN1,SENP2,CDK5,TPST1,TTLL6,PTEN,SGF29,ULK1,UBE2N,DTX3,TBK1,UBE2F,LRRK2,WNK3,ASPH,PDPR,KMT2D,KAT5,MVP,ROS1,FGFR3,LRP6,STK10,TRAF4,PARP4,RIPK2,ASH1L,ADPRS,CDC20,NAT10,EGF…	TTLL6
Cell_org	9.28213e-12	133	4206	1.92942	GO:0043412	macromolecule modification	UBR2,NSUN2,CUL1,CDK14,CTDP1,HDAC4,NEDD4,TRAF5,ULK2,PIGU,PTPRS,PIGL,KAT2A,DPH1,TRIM2,TRIM3,CUL9,WDR48,MOGS,AAK1,SENP5,HELLS,MRM2,P4HA1,WWP1,PIGT,TRAF2,PARP2,NSUN5,PPIL4,TRAF3,MGAT1,PTPRA,DPH2,CCNB1,NAT10,TTLL4,CDKL2,TMTC3,PTPRF,UFC1,MEPCE,HERC4,UBC,PTPRD,CUL4B,SNRK,RPN1,SENP2,CDK5,TPST1,TTLL6,PTEN,SGF29,ULK1,UBE2N,DTX3,TBK1,UBE2F,LRRK2,WNK3,ASPH,PDPR,KMT2D,KAT5,MVP,ROS1,FGFR3,LRP6,STK10,TRAF4,PARP…	TTLL6
Cell_org	0.125877	2	11	11.0938	GO:0051013	microtubule severing	SPAST,TTLL6	TTLL6
Cell_org	0.115035	85	4103	1.26404	GO:0065008	regulation of biological quality	FAS,NEDD4,MOXD1,ULK2,HEPH,DCPS,ECE1,IDE,ABHD8,ABCB7,TRPC4,RAC1,ABCG5,PCSK6,FURIN,LIN7C,FMNL2,ABCG1,BRWD3,RAB8A,ULK1,FLII,LRRK2,WNK3,TTI1,ARNT,CNOT9,RYR2,TRPA1,ABCA2,AAK1,SCP2,COPA,MACF1,HIP1,CSN2,PTPRD,DDAH1,PTEN,ERN1,ASPH,NSUN2,USH2A,ABCC9,LRP6,TRAF5,ITPR3,CSK,PTPRS,KAT2A,WDR48,CDC20,TRAF2,NTRK2,DGKZ,ITPR1,LRRK1,PLCL2,RYK,CDK5,ARF6,SGPL1,DAPK3,PCSK9,TTLL6,ALK,MFN1,KAT5,GAS6,ADA,AMPD2,AP3D1,MET,P…	TTLL6
Cell_org	0.124118	7	152	2.80995	GO:0098876	vesicle-mediated transport to the plasma membrane	RAB8A,VPS53,GGA1,CSK,MACF1,ARF6,SNX27	SNX27
Cell_org	0.100345	51	2219	1.40235	GO:0009891	positive regulation of biosynthetic process	DHX33,MPND,BCL3,TRIP4,KAT2A,DCAF6,POGZ,DDAH1,RMND1,KMT2D,ING2,KAT5,SGF29,THAP3,LRP6,SNW1,MET,ABCA2,RFC5,HELZ2,NAT10,ARNT,EGFR,MEPCE,TAF3,NOD2,DEAF1,TBK1,MITF,XRCC6,BLM,ZBED1,AP3D1,HDAC4,ATRX,ZBED4,ASH1L,ABCB7,E2F5,CNOT9,ABCG1,NLRP3,NPNT,LRRK2,PNKP,ZPR1,NSUN5,PCNA,NEK7,ASPH,RIPK2	RFC5
Cell_org	0.000201464	106	4181	1.54693	GO:0009893	positive regulation of metabolic process	DHX33,MPND,FAS,MUSK,ROS1,FGFR3,BCL3,NEDD4,ULK2,NLRP1,TRIP4,MET,KAT2A,ZPR1,DCPS,NPRL2,CDC20,WWP1,HIP1,DCAF6,POGZ,EGFR,NTRK2,DDAH1,RMND1,RYK,KMT2D,ING2,ALK,KAT5,ULK1,ROR1,LRRK2,EPHB4,FURIN,ARNT,CNOT9,SGF29,THAP3,RIOK2,HDAC4,LRP6,TRAF4,SNW1,RIPK2,ABCA2,RFC5,WDR48,SCP2,TRAF2,HELZ2,PCNA,CCNB1,NAT10,MEPCE,ABCG1,WRN,TAF3,NOD2,PCSK9,PTEN,DEAF1,UBE2N,ERN1,ITLN1,GAS6,TBK1,MITF,XRCC6,WNK3,BLM,ASPH,ZBED1,AP3…	RFC5
Cell_org	0.101047	48	2068	1.41623	GO:0010557	positive regulation of macromolecule biosynthetic process	DHX33,MPND,BCL3,TRIP4,KAT2A,DCAF6,POGZ,RMND1,KMT2D,ING2,KAT5,SGF29,THAP3,LRP6,SNW1,MET,ABCA2,RFC5,HELZ2,NAT10,ARNT,EGFR,MEPCE,TAF3,NOD2,DEAF1,TBK1,MITF,XRCC6,BLM,ZBED1,AP3D1,HDAC4,ATRX,ZBED4,ASH1L,E2F5,CNOT9,NLRP3,NPNT,LRRK2,PNKP,ZPR1,NSUN5,PCNA,NEK7,ASPH,RIPK2	RFC5
Cell_org	0.00239361	94	3847	1.4909	GO:0010604	positive regulation of macromolecule metabolic process	DHX33,MPND,FAS,BCL3,NEDD4,NLRP1,TRIP4,KAT2A,ZPR1,DCPS,CDC20,WWP1,HIP1,DCAF6,POGZ,RMND1,KMT2D,ING2,KAT5,FURIN,CNOT9,SGF29,LRRK2,THAP3,RIOK2,HDAC4,LRP6,TRAF4,SNW1,RIPK2,MET,ABCA2,RFC5,WDR48,TRAF2,HELZ2,PCNA,NAT10,ARNT,EGFR,MEPCE,ABCG1,WRN,TAF3,NOD2,PCSK9,PTEN,DEAF1,UBE2N,ERN1,ITLN1,GAS6,TBK1,MITF,XRCC6,WNK3,BLM,ASPH,ZBED1,AP3D1,TRAF5,ATRX,MSH2,GGA1,ZBED4,CSK,MADD,ASH1L,RAB2B,E2F5,CCNB1,NTRK2,LRRK1,…	RFC5
Cell_org	0.000201464	95	3617	1.60258	GO:0031325	positive regulation of cellular metabolic process	DHX33,MPND,FAS,MUSK,ROS1,FGFR3,BCL3,ULK2,NLRP1,TRIP4,MET,KAT2A,DCPS,NPRL2,CDC20,HIP1,DCAF6,POGZ,EGFR,NTRK2,DDAH1,RMND1,RYK,KMT2D,ING2,ALK,KAT5,ULK1,ROR1,LRRK2,EPHB4,FURIN,ARNT,CNOT9,SGF29,THAP3,RIOK2,HDAC4,LRP6,TRAF4,SNW1,RIPK2,ABCA2,RFC5,WDR48,TRAF2,HELZ2,PCNA,CCNB1,NAT10,MEPCE,ABCG1,WRN,TAF3,NOD2,PCSK9,PTEN,DEAF1,UBE2N,ERN1,ITLN1,GAS6,TBK1,MITF,XRCC6,WNK3,BLM,ASPH,ZBED1,AP3D1,ATRX,MSH2,ZBED4,CS…	RFC5
Cell_org	0.133446	49	2182	1.3702	GO:0031328	positive regulation of cellular biosynthetic process	DHX33,MPND,BCL3,TRIP4,KAT2A,DCAF6,POGZ,DDAH1,RMND1,KMT2D,ING2,KAT5,SGF29,THAP3,LRP6,SNW1,MET,ABCA2,RFC5,HELZ2,NAT10,ARNT,EGFR,MEPCE,TAF3,NOD2,DEAF1,TBK1,MITF,XRCC6,BLM,ZBED1,AP3D1,HDAC4,ATRX,ZBED4,ASH1L,ABCB7,E2F5,CNOT9,NLRP3,NPNT,PNKP,ZPR1,NSUN5,PCNA,NEK7,ASPH,RIPK2	RFC5
Cell_org	0.000834987	43	1280	2.04976	GO:0043085	positive regulation of catalytic activity	FAS,MUSK,ROS1,FGFR3,NLRP1,MET,HIP1,EGFR,NTRK2,RYK,ALK,ROR1,EPHB4,PDPR,LRRK2,TRAF4,ASAP3,MSH2,RIPK2,RIC1,RFC5,CDC20,TRAF2,PCNA,WRN,PTEN,ERN1,GAS6,XRCC6,ASPH,CSK,MADD,CCNB1,ASAP2,NLRP3,CDK5,NOD2,NPNT,PNKP,CENPE,DGKZ,NEK7,UBE2N	RFC5
Cell_org	0.00238732	51	1718	1.8113	GO:0044093	positive regulation of molecular function	FAS,MUSK,ROS1,FGFR3,LRP6,TRAF5,NLRP1,MET,TRAF2,HIP1,EGFR,NTRK2,RYK,ALK,ROR1,EPHB4,WNK3,PDPR,LRRK2,TRAF4,ASAP3,MSH2,RIPK2,RIC1,RFC5,CDC20,IDE,PCNA,WRN,NOD2,PTEN,ERN1,GAS6,XRCC6,ASPH,RYR2,DHX33,CSK,MADD,CCNB1,ASAP2,PLCL2,NLRP3,CDK5,NPNT,PNKP,HDAC4,CENPE,DGKZ,NEK7,UBE2N	RFC5
Cell_org	0.0716255	52	2204	1.43958	GO:0045935	positive regulation of nucleobase-containing compound metabolic process	DHX33,MPND,BCL3,TRIP4,KAT2A,DCPS,DCAF6,POGZ,KMT2D,ING2,KAT5,ARNT,CNOT9,SGF29,THAP3,RIOK2,LRP6,SNW1,MET,RFC5,WDR48,HELZ2,PCNA,EGFR,MEPCE,WRN,TAF3,NOD2,DEAF1,UBE2N,ERN1,TBK1,MITF,XRCC6,BLM,ZBED1,AP3D1,HDAC4,ATRX,MSH2,ZBED4,ASH1L,E2F5,NLRP3,HELQ,NPNT,RTEL1,PNKP,ZPR1,NEK7,ASPH,RIPK2	RFC5
Cell_org	0.00785872	66	2582	1.55967	GO:0050790	regulation of catalytic activity	FAS,MUSK,ROS1,FGFR3,NLRP1,MET,RECK,HIP1,CCNB1,EGFR,NTRK2,RYK,ALK,ROR1,EPHB4,PDPR,LRRK2,MVP,LRP6,TRAF4,ASAP3,MSH2,PARP4,RIPK2,RIC1,RFC5,NPRL2,CDC20,TRAF2,PCNA,CSN2,PIF1,FURIN,WRN,PTEN,ERN1,GAS6,XRCC6,ASPH,FARP2,ITIH4,MCM2,CSK,HERC1,ABCA2,MADD,BIRC6,AGAP3,FGD4,RGS5,ASAP2,NLRP3,CDK5,NOD2,NPNT,FGD6,PNKP,CENPE,DGKZ,NEK7,OXA1L,UBE2N,BLM,PCSK6,DDAH1,IPO7	RFC5
Cell_org	0.00112377	25	572	2.66678	GO:0051052	regulation of DNA metabolic process	RTEL1,MCM2,MCM6,KAT2A,MCM7,KAT5,SGF29,RAD52,MSH2,PARP4,RFC5,WDR48,PCNA,PIF1,EGFR,WRN,UBE2N,ATRX,HELQ,EHMT2,PNKP,NAT10,POGZ,NEK7,BLM	RFC5
Cell_org	0.0232647	14	317	2.69471	GO:0051054	positive regulation of DNA metabolic process	RFC5,WDR48,PCNA,EGFR,WRN,KAT5,UBE2N,ATRX,MSH2,HELQ,RTEL1,PNKP,POGZ,NEK7	RFC5
Cell_org	0.000274204	90	3403	1.61371	GO:0051173	positive regulation of nitrogen compound metabolic process	DHX33,MPND,FAS,BCL3,NEDD4,NLRP1,TRIP4,KAT2A,DCPS,CDC20,WWP1,HIP1,DCAF6,POGZ,DDAH1,RMND1,KMT2D,ING2,KAT5,FURIN,ARNT,CNOT9,SGF29,LRRK2,THAP3,RIOK2,HDAC4,LRP6,TRAF4,SNW1,RIPK2,MET,ABCA2,RFC5,WDR48,TRAF2,HELZ2,PCNA,NAT10,EGFR,MEPCE,ABCG1,WRN,TAF3,NOD2,PCSK9,PTEN,DEAF1,UBE2N,ERN1,ITLN1,GAS6,TBK1,MITF,XRCC6,WNK3,BLM,ASPH,ZBED1,AP3D1,ATRX,MSH2,GGA1,ZBED4,CSK,MADD,ASH1L,ABCB7,E2F5,CCNB1,NTRK2,LRRK1,CUL4B…	RFC5
Cell_org	0.000214529	37	956	2.3615	GO:0051338	regulation of transferase activity	MUSK,ROS1,FGFR3,MET,CCNB1,EGFR,NTRK2,RYK,ALK,ROR1,EPHB4,LRRK2,MVP,LRP6,TRAF4,PARP4,RFC5,NPRL2,CDC20,TRAF2,PIF1,PTEN,ERN1,GAS6,XRCC6,CSK,MADD,CDK5,NOD2,PNKP,PCNA,CENPE,DGKZ,NEK7,UBE2N,BLM,IPO7	RFC5
Cell_org	0.0781735	7	130	3.28548	GO:2000278	regulation of DNA biosynthetic process	PARP4,RFC5,PIF1,PNKP,PCNA,NAT10,NEK7	RFC5
Cell_org	0.140276	3	33	5.54691	GO:0006505	GPI anchor metabolic process	PIGU,PIGL,PIGT	PIGT
Cell_org	0.134832	3	32	5.72025	GO:0006506	GPI anchor biosynthetic process	PIGU,PIGL,PIGT	PIGT
Cell_org	0.130542	14	439	1.94584	GO:0006644	phospholipid metabolic process	PIGU,PIGL,PIGT,ABHD8,PTEN,ABCA2,CHPT1,NAAA,DGKZ,PLCD1,PLCG1,PLD2,PCSK9,SCP2	PIGT
Cell_org	0.198664	11	353	1.90135	GO:0006650	glycerophospholipid metabolic process	PIGU,PIGL,PIGT,ABHD8,PTEN,CHPT1,NAAA,DGKZ,PLCD1,PLD2,PLCG1	PIGT
Cell_org	1.67434e-08	98	3030	1.97345	GO:0006793	phosphorus metabolic process	NADK,MUSK,PNKP,ROS1,CDK14,CTDP1,FGFR3,ULK2,PIGU,PTPRS,MET,PIGL,AAK1,AMPD2,PIGT,ABHD8,DCTD,PPIL4,PTPRA,CCNB1,CDKL2,PTPRF,EGFR,PRPS1,NTRK2,DGKZ,PTPRD,RYK,SNRK,CDK5,ALK,PTEN,ULK1,TBK1,ROR1,LRRK2,EPHB4,WNK3,SHPK,PDPR,ARNT,MVP,LRP6,STK10,TRAF4,RIPK2,ABCA2,UGDH,CHPT1,NPRL2,SCP2,TRAF2,NAAA,NEK7,SIK3,EXTL2,TAF3,DAPK3,MFN1,OXSR1,ERN1,ITLN1,GAS6,PLCD1,XRCC6,RIOK2,HDAC4,TESK2,MYO3B,CSK,MADD,KYNU,NEK9,PLCG1,…	PIGT
Cell_org	1.0966e-07	95	3005	1.92896	GO:0006796	phosphate-containing compound metabolic process	NADK,MUSK,PNKP,ROS1,CDK14,CTDP1,FGFR3,ULK2,PIGU,PTPRS,MET,PIGL,AAK1,AMPD2,PIGT,ABHD8,DCTD,PPIL4,PTPRA,CCNB1,CDKL2,PTPRF,EGFR,PRPS1,NTRK2,DGKZ,PTPRD,RYK,SNRK,CDK5,ALK,PTEN,ULK1,TBK1,ROR1,LRRK2,EPHB4,WNK3,SHPK,PDPR,ARNT,MVP,LRP6,STK10,TRAF4,RIPK2,ABCA2,CHPT1,NPRL2,SCP2,TRAF2,NAAA,NEK7,SIK3,TAF3,DAPK3,MFN1,OXSR1,ERN1,ITLN1,GAS6,PLCD1,XRCC6,RIOK2,HDAC4,TESK2,MYO3B,CSK,MADD,KYNU,NEK9,PLCG1,PLD2,PTPRQ,…	PIGT
Cell_org	0.0102071	66	2618	1.53822	GO:0007399	nervous system development	SDK2,NEDD4,ULK2,MET,ZPR1,RAC1,SDK1,NTRK2,CNTN5,RYK,CDK5,ARF6,ALK,ULK1,ROR1,LRRK2,EPHB4,USH2A,FARP2,MACF1,PTPRD,SPAST,TOP2B,ATRX,ARSA,CSK,HERC1,PTPRS,KAT2A,FOXP1,ECE1,CDC20,RECK,PIGT,NSUN5,TRPC4,PTPRQ,PTPRF,EGFR,CUL4B,CSMD3,KIF27,FAT3,WRN,RAB8A,PCSK9,PTEN,FUT10,KAT5,DEAF1,GAS6,FAT4,LRIG2,EHMT2,UGDH,UFC1,PRPS1,DCTN1,MUSK,LRP6,SNW1,ABCA2,WWP1,HDAC4,TRIM3,NELL1	PIGT
Cell_org	0.16978	10	293	2.08246	GO:0008654	phospholipid biosynthetic process	PIGU,PIGL,PIGT,ABHD8,ABCA2,CHPT1,DGKZ,PLD2,SCP2,PTEN	PIGT
Cell_org	0.0634146	2	6	20.3387	GO:0016255	attachment of GPI anchor to protein	PIGU,PIGT	PIGT
Cell_org	0.120024	28	1083	1.57751	GO:0019637	organophosphate metabolic process	NADK,PIGU,PIGL,AMPD2,PIGT,ABHD8,DCTD,PRPS1,PTEN,ARNT,ABCA2,CHPT1,SCP2,NAAA,DGKZ,MFN1,PLCD1,LRRK2,HDAC4,KYNU,PLCG1,PLD2,DPYS,PCSK9,ADA,SHPK,NUDT8,TPST1	PIGT
Cell_org	0.0131682	48	1757	1.66691	GO:0022008	neurogenesis	NEDD4,ULK2,MET,ZPR1,RAC1,NTRK2,CNTN5,RYK,CDK5,ARF6,ALK,ULK1,ROR1,LRRK2,EPHB4,USH2A,FARP2,MACF1,SPAST,SDK2,TOP2B,CSK,HERC1,PTPRS,ECE1,CDC20,PIGT,NSUN5,TRPC4,PTPRQ,PTPRF,SDK1,PTPRD,CUL4B,CSMD3,FAT3,RAB8A,PCSK9,PTEN,KAT5,GAS6,FAT4,LRIG2,EHMT2,UGDH,LRP6,SNW1,ABCA2	PIGT
Cell_org	0.0164068	41	1449	1.72647	GO:0030182	neuron differentiation	NEDD4,ULK2,MET,ZPR1,RAC1,NTRK2,CNTN5,RYK,CDK5,ARF6,ALK,ULK1,ROR1,LRRK2,EPHB4,USH2A,FARP2,MACF1,SPAST,SDK2,TOP2B,HERC1,PTPRS,ECE1,CDC20,PIGT,PTPRQ,PTPRF,SDK1,PTPRD,CUL4B,CSMD3,FAT3,RAB8A,PCSK9,PTEN,FAT4,LRIG2,EHMT2,UGDH,LRP6	PIGT
Cell_org	0.0209578	42	1522	1.68375	GO:0048699	generation of neurons	NEDD4,ULK2,MET,ZPR1,RAC1,NTRK2,CNTN5,RYK,CDK5,ARF6,ALK,ULK1,ROR1,LRRK2,EPHB4,USH2A,FARP2,MACF1,SPAST,SDK2,TOP2B,HERC1,PTPRS,ECE1,CDC20,PIGT,PTPRQ,PTPRF,SDK1,PTPRD,CUL4B,CSMD3,FAT3,RAB8A,PCSK9,PTEN,GAS6,FAT4,LRIG2,EHMT2,UGDH,LRP6	PIGT
Cell_org	4.00087e-05	57	1684	2.06527	GO:0006468	protein phosphorylation	CDK14,ULK2,AAK1,PPIL4,CCNB1,CDKL2,SNRK,CDK5,ULK1,TBK1,LRRK2,WNK3,MVP,ROS1,FGFR3,LRP6,STK10,TRAF4,RIPK2,TRAF2,EGFR,NEK7,SIK3,TAF3,DAPK3,ALK,PTEN,OXSR1,ERN1,ITLN1,GAS6,EPHB4,XRCC6,MUSK,RIOK2,TESK2,MYO3B,CSK,MET,MADD,NEK9,PTPRA,NTRK2,LRRK1,NEK8,RYK,NOD2,KSR2,ROR1,IRAK4,FAS,RAC1,CENPE,CNOT9,BLM,BIRC6,IPO7	OXSR1
Cell_org	0.00589899	75	2990	1.5305	GO:0007166	cell surface receptor signaling pathway	FAS,MUSK,ROS1,FGFR3,LRP6,TRAF5,CSK,MET,AAK1,TRAF2,TRAF3,EGFR,NTRK2,LRRK1,RYK,ALK,DTX3,LRRK2,EPHB4,ADA,IRAK4,ARNT,FCN2,ING2,TBK1,MVP,CDK14,SNW1,PIGU,MADD,INVS,PLCG1,PTEN,GAS6,FARP2,RIPK2,TRPA1,ECE1,RECK,MACF1,PARP2,PTPRA,POSTN,WDR12,CNOT9,PTPRD,PLCL2,SENP2,CDK5,SVEP1,SGPL1,NOD2,NPNT,OXSR1,ROR1,MITF,FAT4,LRIG2,BCL3,FOXP1,BIRC6,HIP1,RAC1,HERC4,IFI27,DAPK3,EGFL7,UBE2N,NEDD4,DGKZ,IDE,PLD2,PCSK6,FURIN,…	OXSR1
Cell_org	0.168124	29	1194	1.48196	GO:0009628	response to abiotic stimulus	CLPB,XRCC6,CUL4B,BCL3,PCNA,REV1,ARNT,EGFR,ITPR1,DDAH1,WRN,KAT5,ADA,BLM,HDAC4,MSH2,ARSA,TRPA1,ABCG5,PTPRQ,CDK5,PTEN,OXSR1,RYR2,FAS,NEDD4,TBL2,WNK3,PNKP	OXSR1
Cell_org	0.0440337	74	3269	1.38121	GO:0010033	response to organic substance	TRAF5,TBL2,TRAF2,TRAF3,NTRK2,GBP5,GBP4,NOD2,RAB8A,ERN1,DMBT1,LRRK2,SHPK,IRAK4,ARNT,ING2,TBK1,UBR2,FGFR3,NEDD4,SNW1,TRIP4,RIPK2,ZPR1,DCPS,FOXP1,KYNU,VPS4B,PLCG1,POSTN,EGFR,ABCG1,KMT2D,DAPK3,KAT5,GAS6,ADA,BLM,ASPH,RYR2,FAS,HDAC4,LRP6,MCM2,ATRX,ARSA,CSK,TRPA1,KAT2A,DHX15,HELLS,PCNA,PTPRA,CNOT9,SDK1,NLRP3,CDK5,ARF6,MCM7,NPNT,PCSK9,ALK,OXSR1,FAT4,EHMT2,MRC1,ITIH4,ABCA2,ABCC9,IFI27,NLRP1,IDE,PCSK6,FURIN	OXSR1
Cell_org	2.75229e-06	68	1994	2.08079	GO:0016310	phosphorylation	MUSK,PNKP,ROS1,CDK14,FGFR3,ULK2,MET,AAK1,PPIL4,CCNB1,CDKL2,EGFR,NTRK2,DGKZ,RYK,SNRK,CDK5,ALK,ULK1,TBK1,ROR1,LRRK2,EPHB4,WNK3,SHPK,ARNT,MVP,LRP6,STK10,TRAF4,RIPK2,NPRL2,TRAF2,NEK7,SIK3,TAF3,DAPK3,PTEN,OXSR1,ERN1,ITLN1,GAS6,XRCC6,NADK,RIOK2,HDAC4,TESK2,MYO3B,CSK,MADD,NEK9,PTPRA,PRPS1,LRRK1,NEK8,NOD2,KSR2,HYKK,IRAK4,FAS,DHX34,RAC1,CENPE,CNOT9,MCM7,BLM,BIRC6,IPO7	OXSR1
Cell_org	0.0686178	7	124	3.44445	GO:0018107	peptidyl-threonine phosphorylation	RIPK2,OXSR1,ULK1,TBK1,LRRK2,WNK3,CDK5	OXSR1
Cell_org	0.0850735	7	133	3.21137	GO:0018210	peptidyl-threonine modification	RIPK2,OXSR1,ULK1,TBK1,LRRK2,WNK3,CDK5	OXSR1
Cell_org	0.163855	27	1089	1.51279	GO:0032101	regulation of response to external stimulus	NLRP1,FCN2,NOD2,SNW1,FOXP1,GAS6,XRCC6,RIPK2,PTPRS,ASH1L,ZNFX1,TRAF3,PTPRF,GBP5,NLRP3,RYK,PTEN,OXSR1,TBK1,LRRK2,ADA,SHPK,LRIG2,MET,RAC1,PLCG1,FURIN	OXSR1
Cell_org	0.00435624	73	2847	1.56451	GO:0035556	intracellular signal transduction	FAS,ROS1,FGFR3,TRAF4,TRAF5,PLCB4,RIPK2,MET,MADD,NPRL2,TRAF2,TRAF3,RAC1,NTRK2,DGKZ,PLCL2,SIK3,SNRK,NOD2,DAPK3,KSR2,PTEN,ERN1,GAS6,ROR1,PLCD1,LRRK2,WNK3,IRAK4,TTI1,CDC20,HIP1,RYR2,FARP2,BCL3,DHX15,EGFR,ITPR1,NEK8,CLPB,RYK,ARF6,OXSR1,KAT5,UBE2N,BLM,DHX33,NSUN2,HDAC4,ATRX,MSH2,ITPR3,CSK,ASH1L,HELLS,PLCG1,PLD2,LRRK1,ASB16,NPNT,ALK,FAT4,ADA,TBK1,UBR2,NEDD4,SNW1,CCNB1,ASPH,CUL1,FGD4,DDAH1,ING2	OXSR1
Cell_org	0.178231	95	4821	1.20235	GO:0042221	response to chemical	TRAF5,TBL2,TRAF2,TRAF3,RAC1,CPNE8,MIEN1,NTRK2,CNTN5,GBP5,GBP4,NOD2,RAB8A,ERN1,DMBT1,LRRK2,EPHB4,SHPK,IRAK4,AS3MT,ARNT,ING2,TBK1,RAD52,UBR2,FGFR3,NEDD4,ITPR3,SNW1,TRIP4,RIPK2,TRPA1,MET,ZPR1,DCPS,FOXP1,KYNU,ABCG2,VPS4B,PLCG1,POSTN,EGFR,DDAH1,ABCG1,KMT2D,DAPK3,KAT5,GAS6,ADA,BLM,ASPH,RYR2,FAS,HDAC4,LRP6,MCM2,ATRX,ARSA,CSK,KAT2A,DHX15,ADPRS,ECE1,HELLS,PCNA,PTPRA,ABCG5,CNOT9,SDK1,PXDNL,NEK7,NLRP3,RYK,C…	OXSR1
Cell_org	0.150116	30	1222	1.49794	GO:0044092	negative regulation of molecular function	NEDD4,RECK,TRAF3,MVP,BCL3,LRP6,MET,ABCA2,NPRL2,CDC20,CSN2,PIF1,TAF3,PCSK9,PTEN,GAS6,LRRK2,ITIH4,MCM2,CSK,BIRC6,FURIN,MEPCE,NOD2,OXSR1,HDAC4,PTPRF,OXA1L,MITD1,IPO7	OXSR1
Cell_org	2.75229e-06	20	244	5.00131	GO:0046777	protein autophosphorylation	MVP,FGFR3,STK10,ULK2,DAPK3,ALK,OXSR1,ULK1,ERN1,LRRK2,EPHB4,WNK3,ROS1,CSK,EGFR,CDK5,RIOK2,MUSK,AAK1,NTRK2	OXSR1
Cell_org	0.0073895	100	4338	1.40655	GO:0048583	regulation of response to stimulus	FAS,ROS1,FGFR3,TRAF4,TRAF5,CSK,RIPK2,MET,MADD,NPRL2,AAK1,TRAF2,TRAF3,NTRK2,LRRK1,FCN2,NOD2,PTEN,ROR1,LRRK2,ADA,IRAK4,RTEL1,NLRP1,TTI1,KAT2A,HIP1,ARNT,ING2,KAT5,SGF29,RAD52,MVP,CDK14,SNW1,PIGU,DHX15,WDR48,FOXP1,INVS,PLCG1,EGFR,ITPR1,DDAH1,NEK8,CLPB,RYK,ARF6,PCSK9,UBE2N,ERN1,GAS6,XRCC6,DHX33,CTDP1,HDAC4,MSH2,PTPRS,ASH1L,HELLS,RECK,ZNFX1,PARP2,POSTN,FURIN,PTPRF,RGS5,PTPRD,GBP5,PLCL2,NLRP3,HELQ,CDK5,…	OXSR1
Cell_org	0.0164068	61	2427	1.53357	GO:0048584	positive regulation of response to stimulus	FGFR3,TRAF4,TRAF5,CSK,RIPK2,MET,AAK1,TRAF2,TRAF3,NTRK2,LRRK1,FCN2,NOD2,ROR1,IRAK4,TTI1,HIP1,ARNT,LRRK2,NLRP1,SNW1,DHX15,WDR48,PLCG1,EGFR,RYK,ING2,KAT5,UBE2N,ERN1,GAS6,XRCC6,DHX33,MSH2,FOXP1,RECK,ZNFX1,GBP5,PLCL2,NLRP3,HELQ,NPNT,ALK,PTEN,OXSR1,TBK1,ADA,FAS,PNKP,NEDD4,MADD,PCNA,RAC1,POGZ,CNOT9,SIK3,KMT2D,DAPK3,MACF1,DGKZ,PLD2	OXSR1
Cell_org	0.101047	15	456	2.00711	GO:0051051	negative regulation of transport	LMAN1,NEDD4,WNK3,CSK,ABCA2,PCSK9,LRRK2,CDK5,PTEN,OXSR1,ADA,VPS4B,ABCG5,RAC1,ARF6	OXSR1
Cell_org	0.0293578	76	3300	1.40522	GO:0070887	cellular response to chemical stimulus	TRAF5,TBL2,TRAF2,TRAF3,CPNE8,NTRK2,GBP5,GBP4,RAB8A,ERN1,LRRK2,SHPK,IRAK4,AS3MT,ARNT,ING2,TBK1,RAD52,UBR2,FGFR3,NEDD4,SNW1,TRIP4,RIPK2,TRPA1,ZPR1,DCPS,FOXP1,ABCG2,PLCG1,POSTN,EGFR,DDAH1,NOD2,DAPK3,KAT5,GAS6,BLM,ASPH,RYR2,FAS,HDAC4,MCM2,ATRX,CSK,KAT2A,ADPRS,HELLS,PCNA,PTPRA,CNOT9,PXDNL,NEK7,NLRP3,RYK,CDK5,ARF6,MCM7,NPNT,PCSK9,ALK,PTEN,OXSR1,FAT4,EHMT2,MRC1,LRP6,MET,RAC1,IFI27,KMT2D,WNK3,AGAP3,IDE,P…	OXSR1
Cell_org	0.18613	11	346	1.93982	GO:0071214	cellular response to abiotic stimulus	XRCC6,CUL4B,PCNA,WRN,BLM,HDAC4,OXSR1,FAS,NEDD4,PTEN,WNK3	OXSR1
Cell_org	0.109056	58	2609	1.35643	GO:0071310	cellular response to organic substance	TRAF5,TBL2,TRAF2,TRAF3,NTRK2,GBP5,GBP4,RAB8A,ERN1,LRRK2,SHPK,IRAK4,ARNT,ING2,TBK1,UBR2,FGFR3,NEDD4,SNW1,TRIP4,RIPK2,ZPR1,DCPS,FOXP1,PLCG1,EGFR,NOD2,DAPK3,KAT5,GAS6,BLM,RYR2,FAS,HDAC4,MCM2,CSK,TRPA1,KAT2A,HELLS,PTPRA,CNOT9,NLRP3,CDK5,ARF6,MCM7,NPNT,PCSK9,ALK,OXSR1,FAT4,EHMT2,MRC1,LRP6,IFI27,KMT2D,IDE,PCSK6,FURIN	OXSR1
Cell_org	0.18613	11	346	1.93982	GO:0104004	cellular response to environmental stimulus	XRCC6,CUL4B,PCNA,WRN,BLM,HDAC4,OXSR1,FAS,NEDD4,PTEN,WNK3	OXSR1
Cell_org	0.0622652	4	39	6.25805	GO:0000460	maturation of 5.8S rRNA	RRP15,WDR12,NSA2,UTP20	NSA2
Cell_org	0.134832	3	32	5.72025	GO:0000470	maturation of LSU-rRNA	RRP15,WDR12,NSA2	NSA2
Cell_org	0.106947	5	79	3.86177	GO:0042273	ribosomal large subunit biogenesis	RRP15,MDN1,WDR12,NSA2,MRM2	NSA2
Cell_org	0.196489	3	42	4.35829	GO:0032506	cytokinetic process	MITD1,VPS4B,SPAST	MITD1
Cell_org	0.092722	9	208	2.64012	GO:0043393	regulation of protein binding	IDE,PCSK9,LRRK2,PLCL2,CDK5,HDAC4,RIPK2,PTPRF,MITD1	MITD1
Cell_org	0.179801	12	386	1.89687	GO:0051098	regulation of binding	MET,IDE,PCSK9,LRRK2,MEPCE,PLCL2,CDK5,BCL3,HDAC4,RIPK2,PTPRF,MITD1	MITD1
Cell_org	0.100345	27	1006	1.63761	GO:0040007	growth	ULK2,ULK1,ROS1,MACF1,EGFR,CTDP1,OGFR,ATRX,PTPRS,KAT2A,ZPR1,WDR48,FOXP1,PARP2,RYK,CDK5,WRN,SGPL1,ING2,PTEN,KAT5,GAS6,EHMT2,MUSK,FGFR3,KMT2D,CHPT1	KAT5
Cell_org	0.054531	22	702	1.91218	GO:0040008	regulation of growth	ULK2,ULK1,ROS1,MACF1,EGFR,CTDP1,OGFR,PTPRS,ZPR1,FOXP1,PARP2,RYK,CDK5,WRN,SGPL1,ING2,PTEN,KAT5,GAS6,MUSK,FGFR3,CHPT1	KAT5
Cell_org	0.146599	15	496	1.84524	GO:0043161	proteasome-mediated ubiquitin-dependent protein catabolic process	UBR2,CUL1,NEDD4,TRIM2,TRIM3,CDC20,WWP1,AGAP3,CUL4B,LTN1,TRIP4,TRAF4,LRRK2,IFI27,KAT5	KAT5
Cell_org	0.142237	21	772	1.65976	GO:0043632	modification-dependent macromolecule catabolic process	UBR2,CUL1,NEDD4,TRIM2,TRIM3,CDC20,WWP1,AGAP3,HERC4,UBC,CUL4B,LTN1,TRIP4,PTEN,TRAF4,CUL9,UBE2N,LRRK2,VPS4B,IFI27,KAT5	KAT5
Cell_org	0.195405	45	2069	1.32708	GO:0043933	protein-containing complex organization	DHX8,COG4,MDN1,HELLS,HIP1,ERAL1,OXA1L,DRC1,CKAP5,FLII,VPS4B,VPS16,DHX33,SPAST,ATRX,NLRP1,TRPA1,GRWD1,UGDH,CENPE,GBP5,ULK1,ITLN1,MITF,BLM,DCTN1,RAD52,FARP2,MCM2,TRAF2,NEK7,ABCG1,NLRP3,KAT5,ASPH,COX15,MET,MRM2,RAC1,POGZ,ARF6,TAF3,LRRK2,FAS,KMT2D	KAT5
Cell_org	0.0701612	26	910	1.74331	GO:0044257	cellular protein catabolic process	UBR2,CUL1,NEDD4,TRIM2,TRIM3,CDC20,IDE,WWP1,AGAP3,HERC4,UBC,CUL4B,LTN1,TRIP4,ABCA2,FURIN,PCSK9,PTEN,TRAF4,CUL9,UBE2N,LRRK2,VPS4B,TMTC3,IFI27,KAT5	KAT5
Cell_org	0.0164068	37	1263	1.78748	GO:0044265	cellular macromolecule catabolic process	UBR2,CUL1,NEDD4,MANBA,TRIM2,DCPS,TRIM3,CDC20,IDE,WWP1,HELZ2,AGAP3,DHX34,HERC4,UBC,CUL4B,TTC37,LTN1,TRIP4,CNOT9,ABCA2,FURIN,PCSK9,PTEN,NSUN2,TRAF4,TRAF5,CUL9,TRAF2,UBE2N,LRRK2,ZPR1,VPS4B,TMTC3,IFI27,KAT5,ERN1	KAT5
Cell_org	0.0253544	56	2239	1.52608	GO:0048468	cell development	USH2A,NEDD4,ULK2,ZPR1,RAC1,MYOF,NTRK2,CNTN5,RYK,CDK5,ARF6,ULK1,FLII,ROR1,LRRK2,EPHB4,FARP2,MET,FOXP1,MACF1,SPAST,NSUN2,ROS1,CTDP1,HDAC4,TOP2B,ATRX,MSH2,HERC1,PTPRS,ECE1,CDC20,RECK,PARP2,NSUN5,PTPRQ,PTPRF,SDK1,PTPRD,LRRK1,CUL4B,CSMD3,FAT3,RAB8A,ING2,ALK,PTEN,KAT5,FAT4,LRIG2,EHMT2,UGDH,SNW1,ABCA2,KMT2D,DEAF1	KAT5
Cell_org	0.00123698	69	2509	1.678	GO:0051128	regulation of cellular component organization	NEDD4,ULK2,ASAP3,CUL9,AAK1,MACF1,RAC1,MIEN1,NTRK2,ULK1,FLII,ROR1,LRRK2,RTEL1,CDC20,VPS16,DHX33,ROS1,MET,ABCA2,KAT2A,NAT10,PIF1,EGFR,PTPRD,GBP5,ARF6,DAPK3,PCSK9,KAT5,CKAP5,DCTN1,FARP2,SPAST,CTDP1,HDAC4,MCM2,ATRX,PTPRS,FOXP1,HIP1,PARP2,ABCB7,PTPRA,PTPRF,NEK7,RYK,RAD21,CSMD3,CDK5,FAT3,ALK,PTEN,ASPH,LRIG2,EHMT2,PNKP,RIOK2,LMAN1,RIC1,VPS4B,TRAF2,CCNB1,CENPE,SACS,INF2,MUSK,OGFR,CHPT1	KAT5
Cell_org	0.0563229	31	1118	1.69186	GO:0051130	positive regulation of cellular component organization	MIEN1,NTRK2,ROR1,DHX33,MACF1,RAC1,GBP5,PCSK9,KAT5,CKAP5,DCTN1,SPAST,HDAC4,ATRX,KAT2A,CDC20,HIP1,ABCB7,NEK7,PTPRD,ARF6,ALK,ULK1,LRRK2,RTEL1,PNKP,LMAN1,MET,VPS4B,RAD21,CDK5	KAT5
Cell_org	0.000404012	77	2795	1.68094	GO:0051246	regulation of protein metabolic process	FAS,NEDD4,NLRP1,DPH1,DCPS,CDC20,RECK,WWP1,HIP1,PPIL4,DPH2,CCNB1,CNOT9,RMND1,FURIN,LRRK2,MVP,HDAC4,LRP6,TRAF4,RIPK2,ABCA2,TRAF2,CSN2,NAT10,EGFR,CNDP1,ABCG1,SENP2,NELL1,DAPK3,PCSK9,PTEN,KAT5,ULK1,UBE2N,ERN1,ITLN1,GAS6,XRCC6,WNK3,ASPH,ITIH4,GGA1,CSK,KAT2A,MADD,WDR48,BIRC6,TRAF3,ARNT,NTRK2,LRRK1,CUL4B,NLRP3,CDK5,NOD2,ING2,ALK,LRIG2,EHMT2,MUSK,PNKP,FGFR3,BCL3,ATRX,SNW1,RIC1,NSUN5,RAC1,CENPE,TMTC3,SGF2…	KAT5
Cell_org	0.000201464	53	1618	1.99867	GO:0051247	positive regulation of protein metabolic process	FAS,NEDD4,NLRP1,CDC20,WWP1,HIP1,RMND1,FURIN,LRRK2,HDAC4,TRAF4,RIPK2,ABCA2,TRAF2,NAT10,EGFR,ABCG1,PCSK9,PTEN,KAT5,UBE2N,ERN1,ITLN1,GAS6,XRCC6,WNK3,ASPH,GGA1,CSK,KAT2A,MADD,CCNB1,ARNT,NTRK2,LRRK1,CUL4B,NLRP3,CDK5,NOD2,ING2,ALK,MUSK,FGFR3,BCL3,SNW1,NSUN5,RAC1,CENPE,TMTC3,CNOT9,SENP2,TBK1,IDE	KAT5
Cell_org	0.15352	23	880	1.59474	GO:0051603	proteolysis involved in cellular protein catabolic process	UBR2,CUL1,NEDD4,TRIM2,TRIM3,CDC20,IDE,WWP1,AGAP3,HERC4,UBC,CUL4B,LTN1,TRIP4,PTEN,TRAF4,CUL9,UBE2N,LRRK2,VPS4B,TMTC3,IFI27,KAT5	KAT5
Cell_org	0.150116	2	13	9.38708	GO:0051987	positive regulation of attachment of spindle microtubules to kinetochore	KAT5,CCNB1	KAT5
Cell_org	0.00853057	31	937	2.01867	GO:0016567	protein ubiquitination	UBR2,CUL1,NEDD4,TRAF5,TRIM2,TRIM3,CUL9,WWP1,TRAF2,TRAF3,HERC4,UBC,CUL4B,UBE2N,DTX3,CDC20,SENP2,PTEN,LRRK2,G2E3,HERC1,WDR48,BIRC6,DCAF7,DCAF6,ASB16,CDK5,NOD2,LTN1,RIPK2,IFI27	DCAF7
Cell_org	0.00124917	36	1011	2.17268	GO:0032446	protein modification by small protein conjugation	UBR2,CUL1,NEDD4,TRAF5,TRIM2,TRIM3,CUL9,WWP1,TRAF2,TRAF3,UFC1,HERC4,UBC,CUL4B,UBE2N,DTX3,UBE2F,HDAC4,CDC20,SENP2,PTEN,LRRK2,G2E3,HERC1,WDR48,BIRC6,DCAF7,DCAF6,ARNT,ASB16,CDK5,NOD2,LTN1,ZBED1,RIPK2,IFI27	DCAF7
Cell_org	0.0019545	39	1166	2.04084	GO:0070647	protein modification by small protein conjugation or removal	UBR2,CUL1,NEDD4,TRAF5,TRIM2,TRIM3,CUL9,WDR48,SENP5,WWP1,TRAF2,TRAF3,UFC1,HERC4,UBC,CUL4B,SENP2,UBE2N,DTX3,UBE2F,HDAC4,KAT2A,CDC20,PTEN,SGF29,LRRK2,G2E3,HERC1,BIRC6,DCAF7,DCAF6,ARNT,ASB16,CDK5,NOD2,LTN1,ZBED1,RIPK2,IFI27	DCAF7
Eukaryote	3.73e-05	4	9	127.117	GO:0000301	retrograde transport vesicle recycling within Golgi	COG2,COG1,COG7,COG8	COG2
Eukaryote	0.0964229	28	4823	1.66045	GO:0006810	transport	EPN1,MIB1,IPO13,TMED5,TRPM6,COG2,NIPA2,COG7,XPO6,CSN3,STAC3,COG8,VAPA,FMR1,C4BPA,SUN2,ATG4A,SNX25,NCF2,ITPR2,COG1,SRP68,DAPK1,RIPK1,GRB2,CIB1,SCAP,SMG5	COG2
Eukaryote	0.00373818	4	40	28.6013	GO:0006891	intra-Golgi vesicle-mediated transport	COG2,COG8,COG1,COG7	COG2
Eukaryote	0.0214825	29	4206	1.97203	GO:0006996	organelle organization	SUN2,SPAG1,TMED5,RHPN2,FHOD3,COG2,ARMC9,TWF1,CENPJ,FMNL3,COG7,HCFC1,MUS81,SLF1,CNOT1,CIB1,EYA1,KPTN,BRCA2,PTPRD,SGF29,GRB2,VAPA,GAB1,COG1,SMG5,COG8,SCAP,TAF6L	COG2
Eukaryote	0.0343359	5	165	8.66705	GO:0007030	Golgi organization	TMED5,COG2,COG7,COG1,COG8	COG2
Eukaryote	0.0160485	22	2642	2.38163	GO:0008104	protein localization	IPO13,TMED5,TWF1,XPO6,STAC3,SUN2,SLF1,BRCA2,ATG4A,SNX25,COG2,COG1,SRP68,COG7,CIB1,COG8,VAPA,KPTN,CENPJ,SZT2,GPAA1,SGF29	COG2
Eukaryote	0.182569	6	620	2.76786	GO:0010256	endomembrane system organization	SUN2,TMED5,COG2,COG7,COG1,COG8	COG2
Eukaryote	0.199516	11	1680	1.8727	GO:0015031	protein transport	IPO13,TMED5,XPO6,ATG4A,SNX25,COG2,COG1,SRP68,COG7,COG8,CIB1	COG2
Eukaryote	0.129009	13	1695	2.19361	GO:0016192	vesicle-mediated transport	EPN1,MIB1,TMED5,COG2,COG7,COG8,FMR1,C4BPA,NCF2,COG1,VAPA,GRB2,SCAP	COG2
Eukaryote	0.0214825	24	3133	2.19097	GO:0033036	macromolecule localization	IPO13,TMED5,TWF1,XPO6,STAC3,SUN2,VAPA,SLF1,BRCA2,ATG4A,FMR1,SNX25,COG2,COG1,SRP68,COG7,CIB1,COG8,KPTN,CENPJ,SZT2,GPAA1,SGF29,SMG5	COG2
Eukaryote	0.104698	14	1795	2.23074	GO:0045184	establishment of protein localization	IPO13,TMED5,XPO6,BRCA2,ATG4A,SNX25,COG2,COG1,SRP68,COG7,COG8,CENPJ,CIB1,SGF29	COG2
Eukaryote	0.0257027	7	333	6.01227	GO:0048193	Golgi vesicle transport	TMED5,COG2,COG7,COG8,COG1,VAPA,SCAP	COG2
Eukaryote	0.0408569	31	4987	1.7779	GO:0051234	establishment of localization	EPN1,MIB1,IPO13,TMED5,TRPM6,COG2,NIPA2,COG7,XPO6,CSN3,STAC3,COG8,VAPA,FMR1,C4BPA,BRCA2,SUN2,ATG4A,SNX25,NCF2,ITPR2,COG1,SRP68,DAPK1,RIPK1,CENPJ,GRB2,CIB1,SCAP,SGF29,SMG5	COG2
Eukaryote	0.088088	5	259	5.52148	GO:0070085	glycosylation	ALG14,COG2,COG1,COG7,COG8	COG2
Eukaryote	0.152496	15	2175	1.9725	GO:0071705	nitrogen compound transport	IPO13,TMED5,XPO6,ATG4A,FMR1,SNX25,COG2,COG1,SRP68,COG7,COG8,VAPA,RIPK1,CIB1,SMG5	COG2
Eukaryote	0.127549	13	1684	2.20793	GO:0006468	protein phosphorylation	FMR1,PIM2,HUNK,CCNK,RIPK1,TWF1,TRAF6,DAPK1,LAMA1,TRPM6,SYAP1,CIB1,SNX25	CCNK
Eukaryote	0.0465454	22	3030	2.07666	GO:0006793	phosphorus metabolic process	FMR1,PIM2,EYA1,HUNK,PGAP2,PTPRD,GPAA1,PIGP,CCNK,RIPK1,NAAA,TWF1,TRAF6,DAPK1,LAMA1,TRPM6,SYAP1,CIB1,VAPA,SNX25,SMG5,DAPP1	CCNK
Eukaryote	0.0432099	22	3005	2.09394	GO:0006796	phosphate-containing compound metabolic process	FMR1,PIM2,EYA1,HUNK,PGAP2,PTPRD,GPAA1,PIGP,CCNK,RIPK1,NAAA,TWF1,TRAF6,DAPK1,LAMA1,TRPM6,SYAP1,CIB1,VAPA,SNX25,SMG5,DAPP1	CCNK
Eukaryote	0.180537	24	4545	1.5103	GO:0009889	regulation of biosynthetic process	CCNK,FMR1,GLI1,TFDP2,CNOT1,BRCA2,HCFC1,TRAF6,TEAD1,ZBED1,ELP4,TAF6L,SGF29,SCAP,RIPK1,DAPK1,EYA1,DLL4,TTC5,CENPJ,PCBP3,CIB1,PIM2,SMG5	CCNK
Eukaryote	0.0792182	17	2219	2.19117	GO:0009891	positive regulation of biosynthetic process	CCNK,FMR1,TAF6L,HCFC1,SGF29,GLI1,TFDP2,SCAP,RIPK1,BRCA2,TRAF6,TEAD1,ZBED1,EYA1,TTC5,CENPJ,PIM2	CCNK
Eukaryote	0.0793352	26	4181	1.7786	GO:0009893	positive regulation of metabolic process	CCNK,FMR1,EYA1,CNOT1,TAF6L,HCFC1,SGF29,GLI1,TFDP2,SCAP,C4BPA,DLL4,SLF1,RIPK1,BRCA2,TRAF6,TEAD1,DAPK1,ZBED1,TTC5,CENPJ,SYAP1,CIB1,COP1,GRB2,PIM2	CCNK
Eukaryote	0.0964229	21	3210	1.87111	GO:0009966	regulation of signal transduction	VAPA,EYA1,KPTN,DLL4,TRAF6,LAMA1,BRCA2,CCNK,GLI1,CNOT1,RIPK1,CENPJ,CIB1,SNX25,ARMC9,PTPRD,GRB2,NBR1,DAPK1,SZT2,PIM2	CCNK
Eukaryote	0.180537	23	4309	1.52664	GO:0010556	regulation of macromolecule biosynthetic process	CCNK,FMR1,GLI1,TFDP2,CNOT1,BRCA2,HCFC1,TRAF6,TEAD1,ZBED1,ELP4,TAF6L,SGF29,RIPK1,DAPK1,EYA1,DLL4,TTC5,CENPJ,PCBP3,CIB1,PIM2,SMG5	CCNK
Eukaryote	0.0844002	16	2068	2.21286	GO:0010557	positive regulation of macromolecule biosynthetic process	CCNK,FMR1,TAF6L,HCFC1,SGF29,GLI1,TFDP2,RIPK1,BRCA2,TRAF6,TEAD1,ZBED1,EYA1,TTC5,CENPJ,PIM2	CCNK
Eukaryote	0.0916015	24	3847	1.78433	GO:0010604	positive regulation of macromolecule metabolic process	CCNK,FMR1,EYA1,CNOT1,TAF6L,HCFC1,SGF29,GLI1,TFDP2,C4BPA,DLL4,SLF1,RIPK1,BRCA2,TRAF6,TEAD1,DAPK1,ZBED1,TTC5,CENPJ,SYAP1,CIB1,COP1,PIM2	CCNK
Eukaryote	0.0904465	23	3602	1.82629	GO:0010646	regulation of cell communication	VAPA,EYA1,KPTN,DLL4,SYAP1,TRAF6,LAMA1,BRCA2,CCNK,FMR1,GLI1,CNOT1,RIPK1,CENPJ,CIB1,SNX25,ARMC9,PTPRD,GRB2,NBR1,DAPK1,SZT2,PIM2	CCNK
Eukaryote	0.149448	25	4433	1.61297	GO:0019219	regulation of nucleobase-containing compound metabolic process	CCNK,PCBP4,FMR1,EYA1,GLI1,TFDP2,CNOT1,BRCA2,HNRNPF,HCFC1,TRAF6,PCBP3,TEAD1,ZBED1,SLF1,TAF6L,SGF29,ELP4,RIPK1,DLL4,TTC5,CENPJ,CIB1,SMG5,PIM2	CCNK
Eukaryote	0.0916015	23	3617	1.81871	GO:0031325	positive regulation of cellular metabolic process	CCNK,FMR1,EYA1,CNOT1,TAF6L,HCFC1,SGF29,GLI1,TFDP2,SLF1,RIPK1,BRCA2,TRAF6,TEAD1,DAPK1,ZBED1,TTC5,CENPJ,SYAP1,CIB1,COP1,GRB2,PIM2	CCNK
Eukaryote	0.170575	24	4482	1.53153	GO:0031326	regulation of cellular biosynthetic process	CCNK,FMR1,GLI1,TFDP2,CNOT1,BRCA2,HCFC1,TRAF6,TEAD1,ZBED1,ELP4,TAF6L,SGF29,RIPK1,DAPK1,EYA1,SCAP,DLL4,TTC5,CENPJ,PCBP3,CIB1,PIM2,SMG5	CCNK
Eukaryote	0.0995606	16	2182	2.09725	GO:0031328	positive regulation of cellular biosynthetic process	CCNK,FMR1,TAF6L,HCFC1,SGF29,GLI1,TFDP2,RIPK1,BRCA2,TRAF6,TEAD1,ZBED1,EYA1,TTC5,CENPJ,PIM2	CCNK
Eukaryote	0.00373818	30	3952	2.17115	GO:0036211	protein modification process	MIB1,FMR1,PIM2,EYA1,HUNK,PGAP2,PTPRD,ALG14,TRAF6,SGF29,GPAA1,SLF1,BRCA2,TAF6L,HCFC1,PIGP,CCNK,ATG4A,RIPK1,TWF1,DAPK1,LAMA1,TRPM6,COP1,SYAP1,CIB1,ZBED1,SNX25,COG7,DAPP1	CCNK
Eukaryote	0.00373818	31	4206	2.10803	GO:0043412	macromolecule modification	MIB1,FMR1,PIM2,EYA1,ELP4,HUNK,PGAP2,PTPRD,ALG14,TRAF6,SGF29,GPAA1,SLF1,BRCA2,TAF6L,HCFC1,PIGP,CCNK,ATG4A,RIPK1,TWF1,DAPK1,LAMA1,TRPM6,COP1,SYAP1,CIB1,ZBED1,SNX25,COG7,DAPP1	CCNK
Eukaryote	0.00373818	4	40	28.6013	GO:0044788	modulation by host of viral process	CCNK,VAPA,ZBED1,FMR1	CCNK
Eukaryote	0.00373818	3	14	61.2884	GO:0044793	negative regulation by host of viral process	CCNK,VAPA,ZBED1	CCNK
Eukaryote	0.000696879	4	20	57.2025	GO:0044827	modulation by host of viral genome replication	CCNK,VAPA,ZBED1,FMR1	CCNK
Eukaryote	0.00164393	3	8	107.255	GO:0044828	negative regulation by host of viral genome replication	CCNK,VAPA,ZBED1	CCNK
Eukaryote	0.0792182	17	2204	2.20609	GO:0045935	positive regulation of nucleobase-containing compound metabolic process	CCNK,EYA1,CNOT1,TAF6L,HCFC1,SGF29,GLI1,TFDP2,SLF1,RIPK1,BRCA2,TRAF6,TEAD1,ZBED1,TTC5,CENPJ,PIM2	CCNK
Eukaryote	0.170575	10	1316	2.17335	GO:0045944	positive regulation of transcription by RNA polymerase II	CCNK,GLI1,TFDP2,RIPK1,HCFC1,TRAF6,TEAD1,ZBED1,EYA1,TTC5	CCNK
Eukaryote	0.0758205	16	1987	2.30307	GO:0051254	positive regulation of RNA metabolic process	CCNK,CNOT1,TAF6L,HCFC1,SGF29,GLI1,TFDP2,RIPK1,BRCA2,TRAF6,TEAD1,ZBED1,EYA1,TTC5,CENPJ,PIM2	CCNK
Eukaryote	0.0743122	4	127	9.00827	GO:0051702	biological process involved in interaction with symbiont	CCNK,VAPA,ZBED1,FMR1	CCNK
Eukaryote	0.0315359	4	87	13.15	GO:0051851	modulation by host of symbiont process	CCNK,VAPA,ZBED1,FMR1	CCNK
Eukaryote	0.16296	1	3	95.3375	GO:0071619	phosphorylation of RNA polymerase II C-terminal domain serine 2 residues	CCNK	CCNK
Eukaryote	0.162791	4	236	4.84767	GO:0071902	positive regulation of protein serine/threonine kinase activity	TRAF6,CCNK,SYAP1,CIB1	CCNK
Eukaryote	0.170575	1	5	57.2025	GO:1901407	regulation of phosphorylation of RNA polymerase II C-terminal domain	CCNK	CCNK
Eukaryote	0.16296	1	3	95.3375	GO:1901409	positive regulation of phosphorylation of RNA polymerase II C-terminal domain	CCNK	CCNK
Eukaryote	0.0793352	15	1831	2.34308	GO:1902680	positive regulation of RNA biosynthetic process	CCNK,TAF6L,HCFC1,SGF29,GLI1,TFDP2,RIPK1,BRCA2,TRAF6,TEAD1,ZBED1,EYA1,TTC5,CENPJ,PIM2	CCNK
Cell_org	0.115407	5	82	3.72049	GO:0036465	synaptic vesicle recycling	AP3D1,CDK5,ARF6,LRRK2,PLD2	AP3D1
Cell_org	0.140276	6	124	2.95239	GO:0046632	alpha-beta T cell differentiation	AP3D1,BCL3,RIPK2,NLRP3,ADA,FOXP1	AP3D1
Cell_org	0.0954364	80	3774	1.2934	GO:0048513	animal organ development	USH2A,SDK2,MET,SDK1,CNTN5,NEK8,LRP6,ARNT,FOXP1,CSN2,NELL1,BMP1,KAT5,DEAF1,GAS6,FARP2,SEC63,NSUN2,CUL1,CTDP1,AP3D1,HDAC4,BCL3,TRAF4,TOP2B,ATRX,MSH2,CSK,HERC1,RIPK2,PTPRS,KAT2A,ZPR1,WDR48,BIRC6,ASH1L,ECE1,HELLS,PARP2,NSUN5,PCNA,FRAS1,PTPRQ,EGFR,NOM1,NTRK2,FREM2,LRRK1,PLCL2,DRC1,NLRP3,RYK,CDK5,KIF27,FAT3,WRN,ARF6,SGPL1,ING2,NPNT,PCSK9,ALK,PTEN,FUT10,ROR1,MITF,LRRK2,FAT4,ADA,RYR2,MCM2,UFC1,DCTN1,FGFR…	AP3D1
Cell_org	0.0196914	102	4617	1.34798	GO:0048731	system development	SDK2,NEDD4,ULK2,MSH2,MET,ZPR1,RECK,RAC1,SDK1,NTRK2,CNTN5,RYK,CDK5,SVEP1,ARF6,ALK,ULK1,ROR1,LRRK2,EPHB4,USH2A,ARNT,FARP2,FOXP1,PLCG1,MACF1,PTPRD,BMP1,KAT5,GAS6,SPAST,SEC63,CTDP1,AP3D1,HDAC4,BCL3,TOP2B,ATRX,ARSA,CSK,HERC1,RIPK2,PTPRS,KAT2A,WDR48,BIRC6,ASH1L,ECE1,CDC20,HELLS,PIGT,PARP2,NSUN5,PCNA,TRPC4,FRAS1,PTPRQ,PTPRF,EGFR,FREM2,DDAH1,LRRK1,PLCL2,DRC1,CUL4B,NEK8,NLRP3,AIMP1,CSMD3,KIF27,FAT3,WRN,SG…	AP3D1
Cell_org	0.0307354	64	2680	1.4571	GO:0050793	regulation of developmental process	NEDD4,ULK2,RAC1,FMNL2,BRWD3,ARF6,ALK,ULK1,LRRK2,ARNT,ING2,SGF29,FOXP1,PLCG1,MACF1,NELL1,BMP1,KAT5,GAS6,NSUN2,CTDP1,AP3D1,HDAC4,MSH2,TRIP4,RIPK2,PTPRS,KAT2A,ZPR1,CDC20,RECK,PARP2,NSUN5,TTLL4,PTPRF,SDK1,NTRK2,PTPRD,DDAH1,NLRP3,RYK,CSMD3,CDK5,FAT3,SGPL1,DAPK3,NPNT,PTEN,ROR1,MITF,FAT4,ADA,LRIG2,USH2A,EGFR,ZMYM3,INF2,MUSK,FGFR3,SNW1,FGD4,FGD6,XRCC6,ABCG1	AP3D1
Cell_org	0.190467	4	71	3.43752	GO:0140238	presynaptic endocytosis	AP3D1,CDK5,ARF6,LRRK2	AP3D1
Cell_org	0.146599	9	239	2.29767	GO:0000082	G1/S transition of mitotic cell cycle	CDK14,CDK5,PTEN,MEPCE,CUL4B,DGKZ,ZPR1,EGFR,CUL1	-
Metazoa	0.161871	1	34	14.3185	GO:0000096	sulfur amino acid metabolic process	MTRR	-
Metazoa	0.121733	1	17	28.637	GO:0000097	sulfur amino acid biosynthetic process	MTRR	-
Metazoa	0.0979283	1	9	54.0922	GO:0000098	sulfur amino acid catabolic process	MTRR	-
Cell_org	0.178231	3	39	4.69354	GO:0000154	rRNA modification	NSUN5,NAT10,MRM2	-
Cell_org	0.0703919	11	266	2.52322	GO:0000209	protein polyubiquitination	NEDD4,TRAF5,TRIM2,TRIM3,WWP1,TRAF2,TRAF3,UBE2N,CUL1,IFI27,NOD2	-
Metazoa	0.102181	4	514	3.78856	GO:0000280	nuclear division	ASZ1,WNT4,MTBP,SLF1	-
Cell_org	0.0844365	9	202	2.71853	GO:0000302	response to reactive oxygen species	TRPA1,FOXP1,ADPRS,PCNA,ERN1,MET,EGFR,LRRK2,AGAP3	-
Metazoa	0.170267	1	39	12.4828	GO:0000460	maturation of 5.8S rRNA	WDR12	-
Metazoa	0.157527	1	32	15.2134	GO:0000470	maturation of LSU-rRNA	WDR12	-
Eukaryote	0.180537	3	167	5.13795	GO:0000723	telomere maintenance	SLF1,BRCA2,SMG5	-
Cell_org	0.0151239	4	22	11.0938	GO:0000729	DNA double-strand break processing	RAD52,HELQ,BLM,UBE2N	-
Metazoa	0.0843865	7	1071	3.18189	GO:0000902	cell morphogenesis	EPHA4,BOC,ROBO3,LRRK2,TGFB2,DLG4,RAPH1	-
Cell_org	0.0563229	30	1071	1.70913	GO:0000902	cell morphogenesis	USH2A,NEDD4,ULK2,RAC1,CNTN5,FMNL2,RYK,CDK5,BRWD3,ULK1,LRRK2,EPHB4,MET,MACF1,SPAST,TOP2B,PTPRS,ECE1,PTPRQ,EGFR,ITPR1,PTPRD,FAT3,RAB8A,DAPK3,PTEN,ZMYM3,FGD4,NTRK2,FGD6	-
Cell_org	0.0364325	3	15	12.2032	GO:0001325	formation of extrachromosomal circular DNA	RTEL1,WRN,BLM	-
Metazoa	0.0916754	4	435	4.4766	GO:0001503	ossification	WNT4,ADRB2,TGFB2,FZD1	-
Cell_org	0.148023	5	92	3.31609	GO:0001510	RNA methylation	NSUN2,MRM2,NSUN5,TRMO,MEPCE	-
Metazoa	0.155414	1	31	15.7042	GO:0001516	prostaglandin biosynthetic process	CBR1	-
Metazoa	0.150208	1	29	16.7872	GO:0001562	response to protozoan	BCL3	-
Metazoa	0.157527	4	734	2.65302	GO:0001568	blood vessel development	RECK,TGFB2,WNT4,CASP8	-
Eukaryote	0.113923	8	734	3.1173	GO:0001568	blood vessel development	LAMA1,DLL4,MIB1,EYA1,FMNL3,CIB1,EPN1,GAB1	-
Cell_org	0.151335	13	411	1.92995	GO:0001701	in utero embryonic development	NSUN2,MSH2,KAT2A,ZPR1,BIRC6,MGAT1,CCNB1,TTLL4,FURIN,ARNT,EGFR,ADA,PLCG1	-
Metazoa	0.145706	1	27	18.0307	GO:0001702	gastrulation with mouth forming second	ETS2	-
Metazoa	0.0858541	1	4	121.707	GO:0001705	ectoderm formation	ETS2	-
Metazoa	0.164637	2	212	4.59273	GO:0001763	morphogenesis of a branching structure	WNT4,LRRK2	-
Eukaryote	0.137694	4	212	5.39646	GO:0001763	morphogenesis of a branching structure	LAMA1,EYA1,DLL4,GRB2	-
Cell_org	0.186795	7	179	2.3861	GO:0001764	neuron migration	TOP2B,NTRK2,CDK5,FAT3,GAS6,LRIG2,RAC1	-
Metazoa	0.138386	6	1280	2.28201	GO:0001775	cell activation	BCL3,TUSC2,GON4L,WNT4,LRRK2,CASP8	-
Metazoa	0.143849	1	26	18.7242	GO:0001779	natural killer cell differentiation	TUSC2	-
Cell_org	0.100345	3	26	7.04031	GO:0001783	B cell apoptotic process	FOXP1,PTEN,ADA	-
Metazoa	0.13293	5	930	2.61736	GO:0001816	cytokine production	TGFB2,BCL3,TUSC2,LRRK2,CASP8	-
Metazoa	0.11998	3	339	4.30823	GO:0001818	negative regulation of cytokine production	TGFB2,BCL3,TUSC2	-
Metazoa	0.129842	4	620	3.14084	GO:0001819	positive regulation of cytokine production	BCL3,TUSC2,LRRK2,CASP8	-
Metazoa	0.0840698	4	322	6.04757	GO:0001822	kidney development	EPHA4,WNT4,LRRK2,TGFB2	-
Metazoa	0.0843865	3	166	8.79813	GO:0001837	epithelial to mesenchymal transition	TGFB2,WNT4,EPHA4	-
Metazoa	0.0630138	3	130	11.2345	GO:0001838	embryonic epithelial tube formation	FZD1,WNT4,TGFB2	-
Metazoa	0.101714	2	108	9.01537	GO:0001841	neural tube formation	FZD1,TGFB2	-
Metazoa	0.0954469	2	94	10.3581	GO:0001843	neural tube closure	FZD1,TGFB2	-
Cell_org	0.192881	6	142	2.57814	GO:0001889	liver development	MET,SEC63,PCNA,ARF6,PCSK9,ADA	-
Metazoa	0.102091	3	286	5.10661	GO:0001894	tissue homeostasis	BBS12,ADRB2,LDB2	-
Metazoa	0.0630138	8	1165	3.34304	GO:0001932	regulation of protein phosphorylation	TGFB2,BRAT1,BCAR3,LRRK2,EPHA4,DLG4,FZD1,ADRB2	-
Cell_org	0.0781735	31	1165	1.6236	GO:0001932	regulation of protein phosphorylation	PPIL4,CCNB1,LRRK2,MVP,LRP6,TRAF4,RIPK2,TRAF2,EGFR,PTEN,ERN1,ITLN1,GAS6,XRCC6,WNK3,CSK,MADD,NTRK2,LRRK1,CDK5,NOD2,ALK,FAS,MUSK,FGFR3,RAC1,CENPE,CNOT9,BLM,TBK1,IPO7	-
Metazoa	0.02567	8	791	4.92369	GO:0001934	positive regulation of protein phosphorylation	TGFB2,BRAT1,BCAR3,LRRK2,EPHA4,DLG4,FZD1,ADRB2	-
Cell_org	0.033452	25	791	1.92845	GO:0001934	positive regulation of protein phosphorylation	LRRK2,TRAF4,RIPK2,TRAF2,EGFR,ERN1,ITLN1,GAS6,XRCC6,WNK3,CSK,MADD,CCNB1,NTRK2,LRRK1,CDK5,NOD2,ALK,FAS,MUSK,FGFR3,RAC1,CENPE,CNOT9,TBK1	-
Metazoa	0.173863	1	41	11.8739	GO:0001941	postsynaptic membrane organization	DLG4	-
Metazoa	0.0466672	3	95	15.3736	GO:0001942	hair follicle development	TGFB2,SAV1,LDB2	-
Metazoa	0.100301	5	765	3.18189	GO:0001944	vasculature development	RECK,SVEP1,TGFB2,WNT4,CASP8	-
Eukaryote	0.124875	8	765	2.99098	GO:0001944	vasculature development	LAMA1,DLL4,MIB1,EYA1,FMNL3,CIB1,EPN1,GAB1	-
Metazoa	0.15358	1	30	16.2277	GO:0001945	lymph vessel development	SVEP1	-
Metazoa	0.0954469	1	8	60.8537	GO:0001955	blood vessel maturation	RECK	-
Cell_org	0.19865	4	73	3.34334	GO:0001961	positive regulation of cytokine-mediated signaling pathway	RIPK2,TRAF2,TBK1,GAS6	-
Metazoa	0.100301	1	10	48.683	GO:0001993	regulation of systemic arterial blood pressure by norepinephrine-epinephrine	ADRB2	-
Metazoa	0.11115	4	550	3.54058	GO:0002009	morphogenesis of an epithelium	EPHA4,FZD1,WNT4,TGFB2	-
Eukaryote	0.170575	6	550	3.12014	GO:0002009	morphogenesis of an epithelium	LAMA1,MIB1,EYA1,DLL4,TRAF6,GRB2	-
Eukaryote	0.180537	2	63	9.07976	GO:0002011	morphogenesis of an epithelial sheet	LAMA1,DLL4	-
Metazoa	0.162867	1	35	13.9094	GO:0002021	response to dietary excess	ADRB2	-
Metazoa	0.113959	1	14	34.7736	GO:0002024	diet induced thermogenesis	ADRB2	-
Metazoa	0.0858541	1	4	121.707	GO:0002025	norepinephrine-epinephrine-mediated vasodilation involved in regulation of systemic arterial blood pressure	ADRB2	-
Metazoa	0.155414	1	31	15.7042	GO:0002029	desensitization of G protein-coupled receptor signaling pathway	ADRB2	-
Eukaryote	0.165495	3	131	6.5499	GO:0002040	sprouting angiogenesis	DLL4,CIB1,EPN1	-
Eukaryote	0.170575	2	57	10.0355	GO:0002042	cell migration involved in sprouting angiogenesis	DLL4,CIB1	-
Metazoa	0.112833	2	125	7.78928	GO:0002065	columnar/cuboidal epithelial cell differentiation	SAV1,WNT4	-
Metazoa	0.135496	1	22	22.1286	GO:0002089	lens morphogenesis in camera-type eye	BCAR3	-
Metazoa	0.11998	1	16	30.4269	GO:0002091	negative regulation of receptor internalization	DLG4	-
Cell_org	0.136674	2	12	10.1693	GO:0002182	cytoplasmic translational elongation	DPH1,DPH2	-
Cell_org	0.18444	8	218	2.23912	GO:0002221	pattern recognition receptor signaling pathway	NLRP1,FCN2,RIPK2,CLPB,NOD2,TRAF3,PTPRS,IRAK4	-
Cell_org	0.0922821	14	406	2.104	GO:0002253	activation of immune response	CSK,FCN2,PLCG1,XRCC6,RIPK2,ZNFX1,PLCL2,NOD2,TBK1,ADA,FOXP1,UBE2N,DGKZ,PLD2	-
Metazoa	0.155414	1	31	15.7042	GO:0002313	mature B cell differentiation involved in immune response	BCL3	-
Metazoa	0.100301	1	10	48.683	GO:0002315	marginal zone B cell differentiation	BCL3	-
Metazoa	0.168817	1	38	12.8113	GO:0002335	mature B cell differentiation	BCL3	-
Cell_org	0.172118	3	38	4.81705	GO:0002335	mature B cell differentiation	BCL3,PLCL2,ADA	-
Metazoa	0.109426	1	12	40.5691	GO:0002357	defense response to tumor cell	DAPK1	-
Cell_org	0.179801	10	299	2.04067	GO:0002429	immune response-activating cell surface receptor signaling pathway	CSK,FCN2,PLCG1,RIPK2,PLCL2,ADA,FOXP1,UBE2N,DGKZ,PLD2	-
Metazoa	0.11115	6	1108	2.63626	GO:0002520	immune system development	CASP8,BCL3,TUSC2,GON4L,WNT4,TGFB2	-
Metazoa	0.090499	5	653	3.72764	GO:0002521	leukocyte differentiation	CASP8,BCL3,TUSC2,GON4L,WNT4	-
Cell_org	0.179801	10	299	2.04067	GO:0002757	immune response-activating signal transduction	CSK,FCN2,PLCG1,RIPK2,PLCL2,ADA,FOXP1,UBE2N,DGKZ,PLD2	-
Eukaryote	0.183235	2	65	8.80038	GO:0002763	positive regulation of myeloid leukocyte differentiation	TRAF6,RIPK1	-
Cell_org	0.155309	16	549	1.77824	GO:0002764	immune response-regulating signaling pathway	CSK,NLRP1,FCN2,RIPK2,PLCG1,CLPB,NOD2,TRAF3,PLCL2,ADA,PTPRS,FOXP1,UBE2N,DGKZ,PLD2,IRAK4	-
Cell_org	0.179801	6	138	2.65287	GO:0002821	positive regulation of adaptive immune response	MSH2,RIPK2,NLRP3,NOD2,ADA,TRAF2	-
Cell_org	0.163838	6	132	2.77345	GO:0002824	positive regulation of adaptive immune response based on somatic recombination of immune receptors built from immunoglobulin superfamily domains	MSH2,RIPK2,NLRP3,NOD2,ADA,TRAF2	-
Metazoa	0.135496	1	22	22.1286	GO:0002834	regulation of response to tumor cell	DAPK1	-
Cell_org	0.113297	3	28	6.53743	GO:0002862	negative regulation of inflammatory response to antigenic stimulus	NOD2,PLCG1,FURIN	-
Cell_org	0.0703919	3	21	8.71657	GO:0002902	regulation of B cell apoptotic process	FOXP1,PTEN,ADA	-
Cell_org	0.161868	2	14	8.71657	GO:0002903	negative regulation of B cell apoptotic process	FOXP1,ADA	-
Metazoa	0.096762	3	263	5.55319	GO:0003007	heart morphogenesis	TGFB2,SAV1,FZD1	-
Metazoa	0.135496	1	22	22.1286	GO:0003085	negative regulation of systemic arterial blood pressure	ADRB2	-
Metazoa	0.141335	1	25	19.4732	GO:0003148	outflow tract septum morphogenesis	TGFB2	-
Metazoa	0.0207819	2	8	121.707	GO:0003149	membranous septum morphogenesis	FZD1,TGFB2	-
Metazoa	0.0858541	1	4	121.707	GO:0003150	muscular septum morphogenesis	FZD1	-
Metazoa	0.0916754	2	77	12.6449	GO:0003151	outflow tract morphogenesis	FZD1,TGFB2	-
Metazoa	0.147109	1	28	17.3868	GO:0003171	atrioventricular valve development	TGFB2	-
Metazoa	0.135496	1	22	22.1286	GO:0003177	pulmonary valve development	TGFB2	-
Metazoa	0.141335	1	25	19.4732	GO:0003181	atrioventricular valve morphogenesis	TGFB2	-
Metazoa	0.125684	1	18	27.0461	GO:0003184	pulmonary valve morphogenesis	TGFB2	-
Metazoa	0.121733	1	17	28.637	GO:0003198	epithelial to mesenchymal transition involved in endocardial cushion formation	TGFB2	-
Metazoa	0.168817	1	38	12.8113	GO:0003203	endocardial cushion morphogenesis	TGFB2	-
Metazoa	0.0843865	3	171	8.54087	GO:0003205	cardiac chamber development	SAV1,FZD1,TGFB2	-
Metazoa	0.0617793	3	125	11.6839	GO:0003206	cardiac chamber morphogenesis	SAV1,FZD1,TGFB2	-
Metazoa	0.15358	1	30	16.2277	GO:0003209	cardiac atrium morphogenesis	TGFB2	-
Metazoa	0.130816	1	20	24.3415	GO:0003215	cardiac right ventricle morphogenesis	TGFB2	-
Metazoa	0.113959	1	14	34.7736	GO:0003222	ventricular trabecula myocardium morphogenesis	TGFB2	-
Metazoa	0.168817	1	38	12.8113	GO:0003230	cardiac atrium development	TGFB2	-
Metazoa	0.0630138	3	128	11.4101	GO:0003231	cardiac ventricle development	SAV1,FZD1,TGFB2	-
Metazoa	0.147109	1	28	17.3868	GO:0003272	endocardial cushion formation	TGFB2	-
Metazoa	0.0884421	1	5	97.366	GO:0003274	endocardial cushion fusion	TGFB2	-
Metazoa	0.0843865	1	3	162.277	GO:0003275	apoptotic process involved in outflow tract morphogenesis	TGFB2	-
Metazoa	0.0916754	1	6	81.1383	GO:0003278	apoptotic process involved in heart morphogenesis	TGFB2	-
Metazoa	0.0544393	3	110	13.2772	GO:0003279	cardiac septum development	SAV1,FZD1,TGFB2	-
Metazoa	0.0334995	3	75	19.4732	GO:0003281	ventricular septum development	SAV1,FZD1,TGFB2	-
Metazoa	0.140481	1	24	20.2846	GO:0003283	atrial septum development	TGFB2	-
Metazoa	0.0916754	1	6	81.1383	GO:0003284	septum primum development	TGFB2	-
Metazoa	0.0916754	1	6	81.1383	GO:0003289	atrial septum primum morphogenesis	TGFB2	-
Cell_org	0.0745594	3	22	8.32036	GO:0003298	physiological muscle hypertrophy	CTDP1,FOXP1,PARP2	-
Cell_org	0.106947	5	79	3.86177	GO:0003300	cardiac muscle hypertrophy	CTDP1,FOXP1,PARP2,RYR2,HDAC4	-
Cell_org	0.0745594	3	22	8.32036	GO:0003301	physiological cardiac muscle hypertrophy	CTDP1,FOXP1,PARP2	-
Metazoa	0.157527	1	32	15.2134	GO:0003338	metanephros morphogenesis	WNT4	-
Eukaryote	0.190702	1	8	35.7516	GO:0003344	pericardium morphogenesis	DLL4	-
Cell_org	0.161868	2	14	8.71657	GO:0005513	detection of calcium ion	RYR2,ASPH	-
Eukaryote	0.0854853	11	1138	2.76462	GO:0006259	DNA metabolic process	EYA1,BRCA2,MUS81,SLF1,TAF6L,SGF29,FMR1,GLI1,TTC5,SMG5,CIB1	-
Cell_org	0.183773	2	16	7.627	GO:0006266	DNA ligation	PNKP,XRCC6	-
Cell_org	0.00250416	5	23	13.2643	GO:0006268	DNA unwinding involved in DNA replication	MCM2,MCM6,WRN,MCM7,BLM	-
Cell_org	0.0581776	4	38	6.42274	GO:0006270	DNA replication initiation	MCM2,ORC4,MCM7,MCM6	-
Cell_org	0.172118	2	15	8.13547	GO:0006271	DNA strand elongation involved in DNA replication	PCNA,MCM7	-
Cell_org	0.0914978	5	74	4.1227	GO:0006278	RNA-templated DNA biosynthetic process	PIF1,TEP1,PNKP,NAT10,NEK7	-
Eukaryote	0.123512	5	312	4.58353	GO:0006302	double-strand break repair	BRCA2,MUS81,SLF1,EYA1,CIB1	-
Metazoa	0.121021	2	138	7.0555	GO:0006304	DNA modification	ASZ1,MTRR	-
Metazoa	0.0924947	2	87	11.1915	GO:0006305	DNA alkylation	ASZ1,MTRR	-
Metazoa	0.0924947	2	87	11.1915	GO:0006306	DNA methylation	ASZ1,MTRR	-
Eukaryote	0.129251	5	330	4.33352	GO:0006401	RNA catabolic process	FMR1,CNOT1,SMG5,PCBP4,TTC5	-
Eukaryote	0.097553	5	281	5.08919	GO:0006402	mRNA catabolic process	FMR1,CNOT1,SMG5,PCBP4,TTC5	-
Cell_org	0.180437	4	69	3.53716	GO:0006414	translational elongation	DPH1,DPH2,LTN1,TRIP4	-
Metazoa	0.0858541	9	1684	2.60182	GO:0006468	protein phosphorylation	TGFB2,BRAT1,BCAR3,LRRK2,EPHA4,DAPK1,DLG4,FZD1,ADRB2	-
Cell_org	0.166248	3	37	4.94724	GO:0006471	protein ADP-ribosylation	PARP2,PARP4,PNKP	-
Eukaryote	0.170575	4	252	4.53988	GO:0006473	protein acetylation	SGF29,TAF6L,BRCA2,HCFC1	-
Eukaryote	0.136778	4	211	5.42204	GO:0006475	internal protein amino acid acetylation	SGF29,TAF6L,BRCA2,HCFC1	-
Eukaryote	0.123512	3	99	8.66705	GO:0006497	protein lipidation	PGAP2,GPAA1,PIGP	-
Eukaryote	0.0281963	3	33	26.0011	GO:0006505	GPI anchor metabolic process	PGAP2,GPAA1,PIGP	-
Eukaryote	0.0274108	3	32	26.8137	GO:0006506	GPI anchor biosynthetic process	PGAP2,GPAA1,PIGP	-
Metazoa	0.125684	1	18	27.0461	GO:0006555	methionine metabolic process	MTRR	-
Metazoa	0.142526	2	176	5.53216	GO:0006606	protein import into nucleus	BCL3,LRRK2	-
Cell_org	0.172118	4	67	3.64275	GO:0006611	protein export from nucleus	XPO6,GAS6,CDK5,IFI27	-
Eukaryote	0.198392	1	9	31.7792	GO:0006621	protein retention in ER lumen	GPAA1	-
Metazoa	0.0924947	1	7	69.5471	GO:0006627	protein processing involved in protein targeting to mitochondrion	LRRK2	-
Eukaryote	0.0758205	5	226	6.32771	GO:0006643	membrane lipid metabolic process	PGAP2,GPAA1,PIGP,NAAA,VAPA	-
Eukaryote	0.177112	5	439	3.25755	GO:0006644	phospholipid metabolic process	PGAP2,GPAA1,PIGP,NAAA,VAPA	-
Cell_org	0.190934	3	41	4.46459	GO:0006654	phosphatidic acid biosynthetic process	ABHD8,DGKZ,PLD2	-
Eukaryote	0.170575	3	145	5.9175	GO:0006661	phosphatidylinositol biosynthetic process	PGAP2,GPAA1,PIGP	-
Eukaryote	0.152496	3	117	7.33365	GO:0006664	glycolipid metabolic process	PGAP2,GPAA1,PIGP	-
Metazoa	0.147109	1	28	17.3868	GO:0006760	folic acid-containing compound metabolic process	MTRR	-
Metazoa	0.11115	2	121	8.04677	GO:0006766	vitamin metabolic process	MTRR,CBR1	-
Eukaryote	0.170575	3	142	6.04252	GO:0006888	endoplasmic reticulum to Golgi vesicle-mediated transport	TMED5,VAPA,SCAP	-
Cell_org	0.183773	3	40	4.5762	GO:0006891	intra-Golgi vesicle-mediated transport	COPA,RAB6B,COG4	-
Cell_org	0.0791623	11	274	2.44955	GO:0006898	receptor-mediated endocytosis	NEDD4,LRP6,AP4E1,AAK1,MRC1,ABCA2,EGFR,PCSK9,HIP1,RAC1,ARF6	-
Metazoa	0.0843865	11	2254	2.37583	GO:0006928	movement of cell or subcellular component	EPHA4,BOC,ROBO3,TGFB2,WNT4,LDB2,BBS12,BRAT1,RECK,FSIP2,LRRK2	-
Metazoa	0.141192	4	672	2.8978	GO:0006935	chemotaxis	EPHA4,BOC,ROBO3,TGFB2	-
Metazoa	0.170974	13	4206	1.5047	GO:0006996	organelle organization	COA1,UBN2,HCFC1,LRRK2,SLF1,ADRB2,DLG4,ASZ1,WNT4,MTBP,BBS12,HMCN1,FSIP2	-
Eukaryote	0.190702	5	481	2.9731	GO:0007015	actin filament organization	RHPN2,FHOD3,TWF1,KPTN,GRB2	-
Cell_org	0.0815861	8	165	2.95835	GO:0007030	Golgi organization	LMAN1,COG4,LRRK2,RAB2B,KIFC3,RAB2A,RAB6B,RAB8A	-
Metazoa	0.143849	2	178	5.47	GO:0007034	vacuolar transport	ADRB2,LRRK2	-
Metazoa	0.121733	2	139	7.00475	GO:0007041	lysosomal transport	ADRB2,LRRK2	-
Cell_org	0.0765024	6	98	3.73567	GO:0007044	cell-substrate junction assembly	MACF1,RAC1,DAPK3,TESK2,PTPRA,PTEN	-
Cell_org	0.104294	9	215	2.55416	GO:0007051	spindle organization	CKAP5,ATRX,CDC20,SPAST,VPS4B,CCNB1,CENPE,DCTN1,NEK7	-
Cell_org	0.12194	7	151	2.82856	GO:0007052	mitotic spindle organization	CKAP5,CDC20,SPAST,VPS4B,CCNB1,CENPE,DCTN1	-
Cell_org	0.134738	4	58	4.208	GO:0007062	sister chromatid cohesion	RAD21,CDC20,ATRX,POGZ	-
Metazoa	0.133619	1	21	23.1824	GO:0007063	regulation of sister chromatid cohesion	SLF1	-
Metazoa	0.02567	16	2990	2.60511	GO:0007166	cell surface receptor signaling pathway	CASP8,TGFB2,EPHA4,FZD1,WNT4,LRRK2,TTC23,RECK,DLG4,WDR12,BOC,SVEP1,ADRB2,DAPK1,BCL3,BCAR3	-
Eukaryote	0.190871	17	2990	1.62616	GO:0007166	cell surface receptor signaling pathway	MIB1,EYA1,GLI1,DLL4,TRAF6,LAMA1,RIPK1,CENPJ,EPN1,SNX25,ARMC9,PTPRD,GRB2,CIB1,DAPK1,GAB1,FMR1	-
Metazoa	0.0843865	7	1025	3.32469	GO:0007167	enzyme linked receptor protein signaling pathway	TGFB2,EPHA4,FZD1,WNT4,SVEP1,BCAR3,ADRB2	-
Cell_org	0.0234877	31	1025	1.84536	GO:0007167	enzyme linked receptor protein signaling pathway	MUSK,ROS1,FGFR3,MET,EGFR,NTRK2,RYK,ALK,EPHB4,ARNT,ING2,MVP,SNW1,PTPRA,SVEP1,SGPL1,NPNT,GAS6,ROR1,FAT4,LRIG2,PLCG1,HIP1,RAC1,CNOT9,NEDD4,IDE,PCSK6,FURIN,PTPRF,PTPRD	-
Metazoa	0.0884421	5	642	3.79151	GO:0007169	transmembrane receptor protein tyrosine kinase signaling pathway	EPHA4,WNT4,SVEP1,BCAR3,ADRB2	-
Cell_org	0.0151395	23	642	2.18593	GO:0007169	transmembrane receptor protein tyrosine kinase signaling pathway	MUSK,ROS1,FGFR3,MET,EGFR,NTRK2,RYK,ALK,EPHB4,ARNT,MVP,PTPRA,SVEP1,SGPL1,ROR1,FAT4,LRIG2,PLCG1,HIP1,RAC1,CNOT9,NEDD4,IDE	-
Metazoa	0.130816	1	20	24.3415	GO:0007171	activation of transmembrane receptor protein tyrosine kinase activity	ADRB2	-
Cell_org	0.186312	5	104	2.93346	GO:0007173	epidermal growth factor receptor signaling pathway	MVP,EGFR,PLCG1,HIP1,CNOT9	-
Eukaryote	0.190702	1	7	40.8589	GO:0007185	transmembrane receptor protein tyrosine phosphatase signaling pathway	PTPRD	-
Cell_org	0.0745594	2	7	17.4331	GO:0007185	transmembrane receptor protein tyrosine phosphatase signaling pathway	PTPRF,PTPRD	-
Metazoa	0.160022	1	33	14.7524	GO:0007190	activation of adenylate cyclase activity	ADRB2	-
Metazoa	0.17218	1	40	12.1707	GO:0007212	dopamine receptor signaling pathway	LRRK2	-
Metazoa	0.155414	2	196	4.96765	GO:0007219	Notch signaling pathway	TGFB2,WDR12	-
Eukaryote	0.199183	3	196	4.37774	GO:0007219	Notch signaling pathway	MIB1,DLL4,EPN1	-
Metazoa	0.130145	2	151	6.44808	GO:0007224	smoothened signaling pathway	TTC23,BOC	-
Eukaryote	0.170575	3	151	5.68237	GO:0007224	smoothened signaling pathway	GLI1,ARMC9,CENPJ	-
Eukaryote	0.190702	4	318	3.59764	GO:0007249	I-kappaB kinase/NF-kappaB signaling	VAPA,TRAF6,RIPK1,PIM2	-
Cell_org	0.0472493	13	318	2.49436	GO:0007249	I-kappaB kinase/NF-kappaB signaling	TRAF4,TRAF5,RIPK2,TRAF2,TRAF3,NOD2,ROR1,IRAK4,BCL3,DHX15,ASH1L,TBK1,UBE2N	-
Cell_org	0.0686178	9	191	2.8751	GO:0007254	JNK cascade	TRAF4,TRAF5,TRAF2,TRAF3,NOD2,LRRK2,RIPK2,IRAK4,EGFR	-
Metazoa	0.1652	4	764	2.54885	GO:0007268	chemical synaptic transmission	DLG4,EPHA4,ADRB2,LRRK2	-
Cell_org	0.0915788	17	534	1.94246	GO:0007346	regulation of mitotic cell cycle	CUL9,CDC20,CCNB1,PTEN,BLM,MSH2,MEPCE,CUL4B,RAD21,DGKZ,RIOK2,TTC28,VPS4B,CENPE,EGFR,DAPK3,NEK7	-
Metazoa	0.138386	1	23	21.1665	GO:0007398	ectoderm development	ETS2	-
Metazoa	0.0843865	12	2618	2.23146	GO:0007399	nervous system development	EPHA4,BOC,ROBO3,WNT4,LDB2,LRRK2,TGFB2,RECK,DLG4,FZD1,SIM2,RAPH1	-
Metazoa	0.0924947	4	452	4.30823	GO:0007409	axonogenesis	EPHA4,BOC,ROBO3,RAPH1	-
[truncated: 1,472 more rows]

## Sheet: F_Cord Diagram
Stratum	Pathway	Stratum	syntenic_gene	Category
[truncated: 296 more rows]
