# Supplementary material for: Sponge genomes reveal a pre-metazoan origin of the sex determination toolkit and sex chromosomes
Source: Research Square preprint supplement (doi:10.21203/rs.3.rs-8554461/v1), 2026-02-12
Supplement: Supplementary file 14 [file 824f1e78e283973d8ebec180.xlsx]

## Sheet: A. Chondrosia_reniformis
Sex Loci in	Gene_Abbrev	Gene_name	Function in sex determination	Paper
MALE	LON	6Lon protease	The Mitochondrial Lon Protease is Required for Age-specific and Sex-specific Adaptation to Oxidative Stress	10.1016/j.cub.2016.10.044
MALE	RNPC3	RNA-binding region-containing protein 3	the role of RNPC3 in female-specific gonadal function and emphasize a critical role of the minor spliceosome in pituitary and ovarian development and function	10.1016/j.gim.2021.09.019
MALE	FEM1A	Protein fem-1 homolog A-B	Identification of human FEM1A, the ortholog of a C. elegans sex-differentiation gene	10.1016/s0378-1119(01)00756-9
MALE	SLX1	Structure-specific endonuclease subunit SLX1	SlX1, is predicted to be located on the X chromosome and is strongly expressed in both male and female flowers.	10.1093/emboj/18.15.4169
MALE	PIF1	ATP-dependent DNA helicase pif1	Dominance and Sexual Dimorphism Pervade the Salix purpurea L. Transcriptome	10.1093/gbe/evx174
MALE	PEAM2	Phosphomethylethanolamine N-methyltransferase	Epigenetic mechanisms in sex determination and in the evolutionary transitions between sexual systems	10.1098/rstb.2020.0110
MALE	SPT48	Spermatogenesis-associated protein 48	Essential for normal spermatogenesis.	10.1111/and.13027
MALE	LRC40	Leucine-rich repeat-containing protein 40	Leucine-rich repeat and WD repeat-containing protein 1 (LRWD1), a widely expressed protein in the human testicles	10.1186/s12610-021-00130-y
MALE	LRK1	Leucine-rich repeat serine/threonine-protein kinase 1	Leucine-rich repeat and WD repeat-containing protein 1 (LRWD1), a widely expressed protein in the human testicles	10.1186/s12610-021-00130-y
MALE	NEO1	Neogenin	Neo1 transcripts down-regulated in the brain of male compared to female Amami spiny rats	10.1186/s12864-019-5426-6
MALE	ZNFX1	NFX1-type zinc finger-containing protein 1	Comparison of the genotype of markers in the SD region and the sex of the 23 identified recombinants localized the SD region to a short stretch of 17.5 kb in which two protein-coding genes, NFX1-type zinc finger-containing 1 (Znfx1) and anti-Müllerian hormone receptor type II (Amhr2) in Fugu	10.1371/journal.pgen.1002798
MALE	NPL1A	Nucleosome assembly protein 1-like 1-A	Six genes (ATP6, IGFRM, LIA1A, S1A, NPL1A, GAPDH and SOX9) showed higher expression in female fins.	10.4236/ojas.2021.111001
MALE	RRP15	RRP15-like protein	target genes of the SOX17 transcription factor predicted using known transcription factor binding site motifs from the JASPAR Predicted Transcription Factor Targets dataset	http://www.ncbi.nlm.nih.gov/gene/64321
MALE	KDM6A	Lysine-specific demethylase 6A	KDM6A is a demethylase encoded by a gene with female-biased expression due to escape from X inactivation.	https://bsd.biomedcentral.com/articles/10.1186/s13293-022-00452-0
MALE	HAUS7	HAUS augmin-like complex subunit 7	HAUS7 encodes a subunit of the human Augmin protein complex (Goshima et al. 2008) with a proposed function in chromosome alignment during meiosis. While a single HAUS7 variant has been described in a familial case of severe oligozoospermia	https://doi.org/10.1007/s00439-019-02101-w
MALE	NOM1	Nucleolar MIF4G domain-containing protein 1	dmrt3, nom1, abce1, and pkmyt1 play key roles in gonadal sex determination in Acrossocheilus fasciatus	https://doi.org/10.1007/s10499-022-00976-7
MALE	DDX42	ATP-dependent RNA helicase DDX42	DExD/H-box RNA helicase genes are differentially expressed between males and females during the critical period of male sex differentiation in channel catfish	https://doi.org/10.1016/j.cbd.2017.02.008
MALE	HIP1	Huntingtin-interacting protein 1	The colored genes (PAP1, OBP1, PIK1, a1, a2, and α1) are contained within the MAT locus, whereas the white and striped genes (HIP1, MAS2, and RCY1) flank the locus.	https://doi.org/10.1016/j.cub.2009.04.058
MALE	YNG2	Chromatin modification-related protein YNG2	Yng2p-dependent NuA4 Histone H4 Acetylation Activity Is Required for Mitotic and Meiotic Progression	https://doi.org/10.1074/jbc.M102531200
MALE	PTPRD	Receptor-type tyrosine-protein phosphatase delta	Male-specific upregulation of PTPRD past stage 16 could act to stabilize commitment to male fate.	https://doi.org/10.1098/rstb.2020.0109
MALE	UBA1	Ubiquitin-like modifier-activating enzyme 1	UBA1 was previously identified as the causative gene of infantile-onset X-linked spinal muscular atrophy	https://doi.org/10.1111/ene.15528
MALE	INO1	N Inositol-3-phosphate synthase 1	Candidate sex-biased genes under gametogenic conditions had potentially key roles in controlling female- and male-specific gametogenesis.	https://doi.org/10.1371/journal.pone.0219723
MALE	FREM2	MOUSEFRAS1-related extracellular matrix protein 2	Disorders of Sex Development in Individuals Harbouring MAMLD1 Variants:Forty-three potentially deleterious/candidate variants of 18 genes (RET, CDH23, MYO7A, NOTCH2, MAML1, MAML2, CYP1A1, WNT9B, GLI2, GLI3, MAML3, WNT9A, FRAS1, PIK3R3, FREM2, PTPN11, EVC, and FLNA) were identified, which may have contributed to the patient phenotypes. MYO7A was the most commonly identified gene.	https://doi.org/10.3389/fendo.2020.582516
MALE	FREM2	Extracellular matrix protein 3	Disorders of Sex Development in Individuals Harbouring MAMLD1 Variants:Forty-three potentially deleterious/candidate variants of 18 genes (RET, CDH23, MYO7A, NOTCH2, MAML1, MAML2, CYP1A1, WNT9B, GLI2, GLI3, MAML3, WNT9A, FRAS1, PIK3R3, FREM2, PTPN11, EVC, and FLNA) were identified, which may have contributed to the patient phenotypes. MYO7A was the most commonly identified gene.	https://doi.org/10.3389/fendo.2020.582516
MALE	PDE3A	cGMP-inhibited 3',5'-cyclic phosphodiesterase 3A	Microvascular Sex- and Age- Dependent Phosphodiesterase Expression	https://doi.org/10.3389/fragi.2021.719698
MALE	PO21	Retrovirus-related Pol polyprotein from type-1 retrotransposable element R2 (Fragment)	A Novel Imprinted Gene (Sp-Pol) With Sex-Specific SNP Locus and Sex-Biased Expression Pattern Provides Insights Into the Gonad Development of Mud Crab (Scylla paramamosain)	https://www.frontiersin.org/articles/10.3389/fmars.2021.727607/full
MALE	POL2	Retrovirus-related Pol polyprotein from transposon 297	A Novel Imprinted Gene (Sp-Pol) With Sex-Specific SNP Locus and Sex-Biased Expression Pattern Provides Insights Into the Gonad Development of Mud Crab (Scylla paramamosain)	https://www.frontiersin.org/articles/10.3389/fmars.2021.727607/full
MALE	POL5	Retrovirus-related Pol polyprotein from transposon opus	A Novel Imprinted Gene (Sp-Pol) With Sex-Specific SNP Locus and Sex-Biased Expression Pattern Provides Insights Into the Gonad Development of Mud Crab (Scylla paramamosain)	https://www.frontiersin.org/articles/10.3389/fmars.2021.727607/full
MALE	RBGPR	Rab3 GTPase-activating protein non-catalytic subunit	hormone pathways	https://www.genecards.org/cgi-bin/carddisp.pl?gene=RAB3GAP2
MALE	UBXN4	UBX domain-containing protein 4	Annotated with GO sex determination	https://onlinelibrary.wiley.com/doi/full/10.1111/j.1365-2443.2010.01454.x
FEMALE	SOAT1	Sterol O-acyltransferase 1	was correlated with gonadal development and differentiation in H. rugulosus	https://bmcgenomics.biomedcentral.com/articles/10.1186/s12864-021-07879-6
FEMALE	PAO1	Polyamine oxidase 1	polyamine-oxidizing enzymes in the modulation of polyamine concentrations in rat uterus by the female sex hormones.	https://d1wqtxts1xzle7.cloudfront.net/66920069/bf0192399120210504-30168-14jtof1-libre.pdf?1620548891=&response-content-disposition=inline%3B+filename%3DEffects_of_female_sex_hormones_on_polyam.pdf&Expires=1710664181&Signature=fgBmDC1lbYZNz0HgpqtBStx7Qq4k6cHFk78mnFqqgCEYaNnk4YVmTOp8YfNyjrvpLkfm3XExoQbvyMHpb~~07LhdWi9GFzOO2JmwM5o84VCo-Rx8RS4go229id6~-RdapOGfLwGUsC4JYNa04uUGW~dtDxMQOvglo0ZgKEh7H113C…
FEMALE	ADA	Adenosine deaminase	Adenosine deaminase phenotypes among sexual and parthenogenetic lizards in the genus Cnemidophorus (teiidae)	https://onlinelibrary.wiley.com/doi/abs/10.1002/jez.1401710205
FEMALE	CDK13	Cyclin-dependent kinase 13	In a forward genetic screen for gonadogenesis defects in zebrafish, a mutation disrupting cdk21 (cyclin-dependent kinase 21) was identified, which caused gonad hypoplasia, reduced fertility and failure of female sex specification.	https://rep.bioscientifica.com/view/journals/rep/157/4/REP-18-0386.xml
FEMALE	KDM4C	Lysine-specific demethylase 4C	NO but Lysine Demethylase 5D	https://www.mdpi.com/2073-4409/11/5/823
FEMALE	DYH1	Dynein axonemal heavy chain 1	maintain the spectrin cytoskeleton assembly and cell growth	https://www.molbiolcell.org/doi/pdf/10.1091/mbc.e03-11-0848
FEMALE	PIGM	GPI mannosyltransferase 1	GPI mannosyltransferase 4, DNA helicase MCM8-like and kinesin II or their linked genes might be related to reproductive ability	https://www.nature.com/articles/s41598-019-39070-z
FEMALE	CENPE	Centromere-associated protein E	Defects in these proteins affect the SC at the centromere and cause meiosis segregation errors	https://www.pnas.org/doi/abs/10.1073/pnas.1320074110
FEMALE	PCGF1	Polycomb group RING finger protein 1	involved in X chromosome inactivation	https://www.science.org/doi/10.1126/science.aal2512
FEMALE	KDM4A	Lysine-specific demethylase 4A	control of genes involved in life span and male-specific sex determination in the fly.	https://www.sciencedirect.com/science/article/pii/S0378111909004971?casa_token=7k3E3vLftf0AAAAA:oTSnM36_LwFgFb9Ah2kCmeWHUTZkm94koUAo4O-9Qg3LLEqi23NyV6ELBePRdBhH2yraRX6j
FEMALE	DCTN3	Dynactin subunit 3	NO but Dynactin subunit 5 in flagellar architecture of sperm	https://www.sciencedirect.com/science/article/pii/S1095643308011239?casa_token=CWLyu8hXJlwAAAAA:hb8H0_-rzZHnT2zAaqQP4gxXAz_HzyxizEsLGgC2inmFq7pE0k0cNRwgMggs_ra-R1Y311Z8
FEMALE	NSUN2	RNA cytosine C(5)-methyltransferase NSUN2	Testis Differentiation	https://www.tandfonline.com/doi/pdf/10.1128/mcb.01523-12
FEMALE	FUCO	Alpha-L-fucosidase	Rat Testis During Sexual Maturity	https://www.tandfonline.com/doi/pdf/10.3109/01485018808986729

## Sheet: B. Oscarella_lobularis
Sex Loci in	Gene_abbrev	Gene_name	Function in sex determination	Paper
MALE	PIF1	ATP-dependent DNA helicase pif1	Dominance and Sexual Dimorphism Pervade the Salix purpurea L. Transcriptome	https://doi.org/10.1093/gbe/evx174
MALE	SPER	Egg peptide speract receptor	Sperm-activating peptides in the regulation of ion fluxes, signal transduction and motility	https://ijdb.ehu.eus/article/072550ad
MALE	VGFR1	Vascular endothelial growth factor receptor 1	Vascular endothelial growth factor A: just one of multiple mechanisms for sex-specific vascular development within the testis?	https://joe.bioscientifica.com/view/journals/joe/227/2/R31.xml
MALE	APC1	Anaphase Promoting Complex	The Role of cort and Anaphase Promoting Complex/Cyclosome (APC/C) in Drosophila Sex Determination and Meiosis(APC/C) in Drosophila Sex Determination and Meiosis	https://www.frontiersin.org/journals/plant-science/articles/10.3389/fpls.2021.642934/full
MALE	RECQ	ATP-dependent DNA helicase RecQ	Sex linked in Sea cucumber Apostichopus japonicus	https://www.sciencedirect.com/science/article/abs/pii/S1096495925000028
MALE	RPTOR	Regulatory-associated protein of mTOR	The mTORC1 component RPTOR is required for maintenance of the foundational spermatogonial stem cell pool in mice	https://academic.oup.com/biolreprod/article/100/2/429/5094553
MALE	FAT4	Protocadherin Fat 4	A total of 12 potential candidates were differentially expressed in both transcriptomes and methylomes (CLEC2D, ITGAM, S100A16, TRIM39, KIF21B, ERP29, PAX7, TEKT1, MSMB, FCN1, and FAT4) between gonads	https://academic.oup.com/biolreprod/article/107/5/1217/6644448
MALE	FCN1	Ficolin-1	A total of 12 potential candidates were differentially expressed in both transcriptomes and methylomes (CLEC2D, ITGAM, S100A16, TRIM39, KIF21B, ERP29, PAX7, TEKT1, MSMB, FCN1, and FAT4) between gonads	https://academic.oup.com/biolreprod/article/107/5/1217/6644448
MALE	TEKT1	Tektin-1	12 potential candidates were differentially expressed in both transcriptomes and methylomes with 11 (CLEC2D, ITGAM, S100A16, TRIM39, KIF21B, ERP29, PAX7, TEKT1, MSMB, FCN1, and FAT4)	https://academic.oup.com/biolreprod/article/107/5/1217/6644448
MALE	TES	Testin	Mouse Testin: Complementary DNA Cloning, Genomic Organization, and Characterization of Its Proximal Promoter Region	https://academic.oup.com/biolreprod/article/68/4/1376/2683840
MALE	FRAS1	Fraser Extracellular Matrix Complex Subunit 1	We postulate that a requirement for expression of Frem2 and Fras1 in NSICs early in gonadogenesis may contribute to the ambiguous genitalia phenotype seen in this model. This finding supports the idea that NSICs, not just Sertoli and FLCs, may play an important role in masculinization during fetal life.	https://academic.oup.com/biolreprod/article/92/6/145,%201-17/2434117?login=false
MALE	FGFR4	Fibroblast growth factor receptor 4	Testis Determination Requires a Specific FGFR2 Isoform to Repress FOXL2	https://academic.oup.com/endo/article/158/11/3832/4117227
MALE	MSH2	DNA mismatch repair protein Msh2	A Hormone That Lost Its Receptor: Anti-Müllerian Hormone (AMH) in Zebrafish Gonad Development and Sex Determination	https://academic.oup.com/genetics/article/213/2/529/5930589
MALE	HMCN1	Hemicentin 1	Hemicentin-1 (Hmcn1) is a matricellular immunoglobin. We found that Hmcn1 is expressed in all studied cell types besides XY supporting cells. This protein was claimed to be responsible for organization of tissues (Vogel and Hedgecock, 2001) and thus might be also key for establishing the gonadal structure.¿¿¿???	https://academic.oup.com/mbe/article-abstract/37/3/799/5618730?login=false
MALE	SVEP1	Sushi	NDM and Sushi are male-specific expression genes	https://brill.com/view/journals/cr/95/7/article-p723_1.xml
MALE	WDR1	WD repeat-containing protein 1	Sex linked in anurans	https://core.ac.uk/download/pdf/18412461.pdf
MALE	PTPRD	Receptor-type tyrosine-protein phosphatase delta	Male-specific upregulation of PTPRD past stage 16 could act to stabilize commitment to male fate.	https://doi.org/10.1098/rstb.2020.0109
MALE	TORSO	Tyrosine-protein kinase receptor torso	Antagonism between germ cell-less and Torso receptor regulates transcriptional quiescence underlying germline/soma distinction	https://elifesciences.org/articles/54346
MALE	MRC1	Mediator of replication checkpoint protein 1	MDC1 directs chromosome-wide silencing of the sex chromosomes in male germ cells	https://genesdev.cshlp.org/content/25/9/959.short
MALE	NEK2	Serine/threonine-protein kinase Nek2	The MAPK pathway triggers activation of Nek2 during chromosome condensation in mouse spermatocytes	https://journals.biologists.com/dev/article/129/7/1715/52005/The-MAPK-pathway-triggers-activation-of-Nek2
MALE	FGFR1	fibroblast growth factor receptor 1	GFR1, FGFR3 and FGFR4 were found in somatic and germ cells throughout both XY and XX gonads at 11.5 dpc, indicating that they could have a role in gonad formation	https://journals.biologists.com/dev/article/131/15/3627/42510/Fgf9-induces-proliferation-and-nuclear
MALE	FAT2	FAT atypical cadherin 2	The cadherin Fat2 is required for planar cell polarity in the Drosophila ovary	https://journals.biologists.com/dev/article/136/24/4123/76516/The-cadherin-Fat2-is-required-for-planar-cell
MALE	SETB1	Histone-lysine N-methyltransferase SETDB1	The methyltransferase Setdb1 is essential for meiosis and mitosis in mouse oocytes and early embryos	https://journals.biologists.com/dev/article/143/15/2767/47468/The-methyltransferase-Setdb1-is-essential-for
MALE	INSRR	Insulin receptor-related protein	A number of positive regulators of Sry have been unveiled including Insulin receptor-related receptor (Insrr)	https://journals.physiology.org/doi/full/10.1152/physrev.00044.2019?utm_campaign=Physiological_Reviews_TrendMD_0&utm_medium=cpc&journalCode=physrev&utm_source=TrendMD
MALE	SEP3	Developmental protein SEPALLATA 3	In Trichosanthes kirilowii , SEP3 is a member of the MADS TF family and it is important in determining flowering time as well as floral organ identity through the formation of multiprotein complexes with other MADS-family TFs	https://journals.plos.org/plosone/article?id=10.1371/journal.pone.0239230
MALE	GDE1	Glycerophosphodiester phosphodiesterase 1	There were 890 genes with higher expression in ZZ (genetic males) gonad at stage NF53 (the onset of sexual differentiation of gonads). The upregulated known genes are coiled-coil domain containing 50 (ccdc50), retinol-binding protein 4 (rbp4), signaling molecules igf1 and igf3, estrogen receptor 2 (esr2), transcription factors, Kruppel-like factor 9 (klf9), Kruppel-like factor 15 (klf15), and fox…	https://link.springer.com/article/10.1007/s00427-019-00630-y
MALE	GP2	Glycoprotein 2	These 4 novel genes including Trophoblast glycoprotein-like, Protein PML-like, Protein singed-like and PREDICTED: paramyosin, while being supported by RT-qPCR, displayed sexually dimorphic gene expression patterns	https://link.springer.com/article/10.1186/s12864-021-07838-1
MALE	WDR48	WD repeat-containing protein 48	novel candidate variants in the DHCR24, BMPR1B, NODAL, and WDR48 genes detected in the genome of a 15-month-old child diagnosed with MPH, manifested as partial androgen insensitivity syndrome (AIS).	https://onlinelibrary.wiley.com/doi/full/10.1002/ccr3.3286
MALE	SEP9	Transcription factor spt8	The mutations of these genes render the cells sterile and, at the same time, prone to form hyphae. The sterility is due to the inability to perform a G1 function, i.e. the switch from the vegetative cell cycle to the sexual pathway	https://onlinelibrary.wiley.com/doi/pdf/10.1002/(SICI)1097-0061(19990615)15:8%3C669::AID-YEA411%3E3.0.CO;2-K?casa_token=ea0uBua3zIwAAAAA:_jWhjKpEU2jVCDM2HPyO318DVDuXoTVoNHojOCKM7e2DbZZFfA75KsZzPCUFjMIoCwYf93XyYBxPeg
MALE	UFD1	Ubiquitin fusion degradation protein 1	In this study, four ubiquitin-related genes yod1, ufd1, mindy3 and ublcp1 were found to be up-regulated in pseudomales and the corresponding proteins were also up-regulated	https://peerj.com/articles/8801/
MALE	FGFR	Fibroblast growth factor receptor	Fibroblast growth factor receptor 2 regulates proliferation and Sertoli differentiation during male sex determination	https://pubmed.ncbi.nlm.nih.gov/17940049/			Male-to-Female Sex Reversal in Mice Lacking Fibroblast Growth Factor 9	https://www.cell.com/fulltext/S0092-8674(01)00284-7	Testis Determination Requires a Specific FGFR2 Isoform to Repress FOXL2	https://academic.oup.com/endo/article/158/11/3832/4117227
MALE	CBP	CREB-binding protein	Our data suggest a role for CBP/p300 in testis determination mediated by control of histone acetylation at the Sry locus and reveal a novel element in the epigenetic control of Sry and mammalian sex determinatio	https://pubmed.ncbi.nlm.nih.gov/29145650/
MALE	SPAG6	Sperm-associated antigen 6	The sperm-associated antigen 6 interactome and its role in spermatogenesis	https://rep.bioscientifica.com/view/journals/rep/158/2/REP-18-0522.xml
MALE	INO80	Chromatin-remodeling ATPase INO80	INO80 is expressed in developing spermatocytes during the early stages of meiotic prophase I.; INO80 in DNA repair factor localization, thereby facilitating the silencing of sex-linked genes during the onset of pachynema	https://www.biorxiv.org/content/10.1101/2023.01.04.522761v1.abstract;
MALE	SYMPK	Symplekin	SYMPK Is Required for Meiosis and Involved in Alternative Splicing in Male Germ Cells	https://www.frontiersin.org/articles/10.3389/fcell.2021.715733/full
MALE	POL2	DROMERetrovirus-related Pol polyprotein from transposon 297	A Novel Imprinted Gene (Sp-Pol) With Sex-Specific SNP Locus and Sex-Biased Expression Pattern Provides Insights Into the Gonad Development of Mud Crab (Scylla paramamosain)	https://www.frontiersin.org/articles/10.3389/fmars.2021.727607/full
MALE	TEMPT	Temptin	One particular new female-biased gene found in the present study was Temptin	https://www.frontiersin.org/journals/genetics/articles/10.3389/fgene.2019.00840/full
MALE	MRP3	ATP-binding cassette sub-family C member 3	MRP3 is a sex determining gene in the diatom Pseudo-nitzschia multistriata	https://www.nature.com/articles/s41467-018-07496-0
MALE	NAT10	RNA cytidine acetyltransferase	Maternal NAT10 orchestrates oocyte meiotic cell-cycle progression and maturation in mice	https://www.nature.com/articles/s41467-023-39256-0
MALE	ABHD8	Protein ABHD8	ABHD8 is one of the Top 25 significantly down-regulated genes in the female DRG following CCI injury of the sciatic nerve.	https://www.ncbi.nlm.nih.gov/pmc/articles/PMC10252608/
MALE	BBS7	BBSome complex member BBS7	Genes found to be central causes of hypogonadism	https://www.ncbi.nlm.nih.gov/pmc/articles/PMC4447314/
MALE	IGF1R	Insulin-Like Growth Factor 1 Receptor	This study showed that insulin/IGF signaling is absolutely essential for sex determination and testis differentiation in mice,	https://www.ncbi.nlm.nih.gov/pmc/articles/PMC6770468/
MALE	CSMD1	CUB and sushi domain-containing protein 1	Rare mutations in the complement regulatory gene CSMD1 are associated with male and female infertility	https://www.ncbi.nlm.nih.gov/pmc/articles/PMC6789153/
MALE	C2CD5	C2 domain-containing protein 5	Average expression of closest upstream and downstream genes of selected female-biased genes in BC	https://www.ncbi.nlm.nih.gov/pmc/articles/PMC8070832/
MALE	LBR	Lamin-B receptor	The B-type lamin is required for somatic repression of testis-specific gene clusters	https://www.pnas.org/doi/abs/10.1073/pnas.0811933106
MALE	ATRX	Transcriptional regulator ATRX	XY patients with deletions or mutations in this gene display varying degrees of sex reversal, implicating ATRX in the development of the human testis.	https://www.pnas.org/doi/abs/10.1073/pnas.230424497
MALE	DHRS7	DHCR7 7-dehydrocholesterol reductase: catalyzes the conversion of 7-dehydrocholesterol to cholesterol.		https://www.sciencedirect.com/science/article/abs/pii/S037811192200909X
MALE	PRKDC	Protein Kinase, DNA-Activated, Catalytic Subunit	Cd151, Dab2, Klk8, Meg3, and Prkdc are novel sexually dimorphic autosomal genes.	https://www.sciencedirect.com/science/article/pii/S0006899314003655?casa_token=ym5Gumg-XUMAAAAA:5eeymiemlQQ4j5BECQSf0FkeE6oLpjW98S8B91cGKZMRKjB2i8W80DXBH6d2lq7ZwuHbLNJHkw
MALE	G2E3	G2/M phase-specific E3 ubiquitin-protein ligase	mitogenic factors, such as lim homeobox 2, amphiregulin, G2/M phase-specific E3 ubiquitin-protein ligase, and connector enhancer of kinase suppressor of ras 2, which are up regulated in conjunction with the anti-apoptotic gene G2/M phase-specific E3 ubiquitin-protein ligase suggesting a potential involvement in regulating the number of germ cells	https://www.sciencedirect.com/science/article/pii/S001664801830131X
MALE	RIFK	Riboflavin kinase	Twenty-five transcripts significantly higher expressed in embryonic day 3 male chicken embryos	https://www.sciencedirect.com/science/article/pii/S0093691X10002712
MALE	TENR	Tenascin-R	Sex-dependent expression of tenascin-C in the differentiating fetal rat testis and ovary	https://www.sciencedirect.com/science/article/pii/S0301468109607817
MALE	ADCYA	Adenylate cyclase type 10	Has a critical role in mammalian spermatogenesis by producing the cAMP which regulates cAMP-responsive nuclear factors indispensable for sperm maturation in the epididymis. Induces capacitation, the maturational process that sperm undergo prior to fertilization	https://www.sciencedirect.com/science/article/pii/S0925443914002233
FEMALE	TAF8	Transcription initiation factor TFIID subunit 8	The female-biased gonochoristic-specific genes included, among others, the TATA binding proteins Taf8 and Taf15	https://www.frontiersin.org/articles/10.3389/fgene.2018.00749/full
FEMALE	TAR1	Tyramine receptor 1	TAR1 knockout could reduce the sex pheromone biosynthesis in female Plutella xylostella	https://onlinelibrary.wiley.com/doi/pdf/10.1002/ps.7571?casa_token=XF-BPS73ofgAAAAA:lNYJPTtXeUTMHucpuwVfvHXV9junOuHzeVwhc08qieVwAMDzYpwBGTLMmfmQkXDGW20NwKS-L7xAzVo

## Sheet: C. Petrosia_ficiformis
Sex Loci in	Gene_abbreviation	Gene name	Function in sex determination	Paper
MALE	AGRL3	Adhesion G protein-coupled receptor L3	Further, putative orthologs of some the male-biased GSGs have known functions in sex determination or differentiation in other vertebrates. We conclude that the GSR of sea lamprey plays an important role in testicular differentiation and potentially sex determination. or a single copy in the GSR but no copy in the somatic genome (e.g., agrl3, cxb1, hsop3, rpab4)	https://www.ncbi.nlm.nih.gov/pmc/articles/PMC9090840/
MALE	ATR	Serine/threonine-protein kinase ATR	In mammals, homologs that fail to synapse during meiosis are transcriptionally inactivated. This process, meiotic silencing, drives inactivation of the heterologous XY bivalent in male germ cells (meiotic sex chromosome inactivation [MSCI]) and is thought to act as a meiotic surveillance mechanism. ATR first regulates unsynapsed chromosome sensing and later transduces signals to the surrounding c…	https://www.ncbi.nlm.nih.gov/pmc/articles/PMC3713429/
MALE	CDCH	Ovulation hormone	CDCH induces ovulation and egg-mass production; it may also stimulate synthesis of secretory products in the female accessory sex glands and affect neurons in the neuronal circuits controlling locomotion and feeding.	https://www.jneurosci.org/content/8/11/4184.short
MALE	CDON	Cell adhesion molecule-related/down-regulated by oncogenes	Totally, 12 genes (Dmrt1, Amh, Sox9, Tex14, Trim71, Slc26a8, Spam1, Tdrp, Tsga10, Boc, Cxcl14, and Hsd17b3) were identified to be specifically related to duck testicular development, and 11 genes (Hsd17b1, Cyp19a1, Cyp17a1, Hhipl2, Tdrp, Uts2r, Cdon, Axin2, Nxph1, Brinp2, and Brinp3) were specifically related to duck ovarian development.	https://www.frontiersin.org/articles/10.3389/fgene.2022.1037810/full
MALE	CSTF3	Cleavage stimulation factor subunit 3	CHD2 interacts with the cleavage stimulation factor CSTF3 and upregulates the expression of OCT4 and PLZF by improving mRNA stability. This is the first study to reveal the role and mechanism of CHD2 in maintaining spermatogonial self-renewal.	https://www.sciencedirect.com/science/article/pii/S2589004222018247
MALE	DPPA2	Developmental pluripotency-associated protein 2	Here, we present the first detailed analysis of Dppa2 and Dppa4, showing that these genes are closely linked, that they encode putative SAP domain proteins, and that their expression is restricted to pluripotent cells and the developing germ line.	https://stemcellsjournals.onlinelibrary.wiley.com/doi/pdf/10.1634/stemcells.2006-0269
MALE	ECD	Ecdysoneless	Ecd is also expressed in the ovary, and is required in both the follicle cells and the germline for oocyte development.	https://journals.biologists.com/dev/article/131/11/2715/42264/Cell-autonomous-roles-of-the-ecdysoneless-gene-in
MALE	EKI	Ethanolamine kinase	Our suppression subtraction hybridization screen revealed higher expression of Eki2 in differentiating testis than ovary at 12.5 dpc. Before the onset of sex determination, Eki2 was expressed in the bipotential supporting cell precursors of both sexes and was up-regulated in males but down-regulated in females coincident with the activation of Sry	https://doi.org/10.1210/en.2008-0584
MALE	FOXP4	Forkhead box protein P4	The unusual rainbow trout sex determination gene hijacked the canonical vertebrate gonadal differentiation pathway	https://www.pnas.org/doi/pdf/10.1073/pnas.1803826115
MALE	FUCM	fucose mutarotase	The observation that FucM-/- female mouse exhibits a phenotypic similarity to a wild-type male in terms of its sexual behavior appears to be due to the neurodevelopmental changes in preoptic area of mutant brain resembling a wild-type male.	https://www.ncbi.nlm.nih.gov/pmc/articles/PMC2912782/
MALE	GLPK2	Glycerol kinase 2	Key enzyme in the regulation of glycerol uptake and metabolism. Essential for male fertility and sperm mitochondrial sheath formation	https://www.ncbi.nlm.nih.gov/pmc/articles/PMC7826524/
MALE	HEY1	Hairy/enhancer-of-split related with YRPW motif protein 1	Biased in female mamal development	https://bsd.biomedcentral.com/articles/10.1186/s13293-023-00520-z
MALE	KANK4	KN motif and ankyrin repeat domain-containing protein 4	Neighbouring genes of Dmrt in catfish: Irrc40, Irrc7, Insl5a, Ak4, Jak1, Foxd3, Kank4, Cyldl, Adcyaplr1b, and Dmrt2b on Chr11;	https://www.ncbi.nlm.nih.gov/pmc/articles/PMC9095985/
MALE	KAT5	Histone acetyltransferase KAT5	Sly encodes a protein that is very highly expressed in round spermatids, and among the proteins with which it interacts are the acrosomal protein DKKL1 and the chromatin modifier and transcriptional coactivator KAT5 (aka TIP60) [17]	https://journals.plos.org/plosbiology/article?id=10.1371/journal.pbio.1000244
MALE	KCP	Kielin/chordin-like protein	X-chromosome genes that show a significant expression bias	https://www.semanticscholar.org/paper/The-Evolution-of-Sex-Chromosomes-and-Sex-Mechanisms-Urton/7ad3f036e2a9abec1581de5a93d732dd50b196fa
MALE	LORF2	LINE-1 retrotransposable element ORF2 protein	differentially downregulated in female lampreys	https://mspace.lib.umanitoba.ca/items/eac3702b-a2e7-4813-8713-20255565f32b
MALE	M3K4	Mitogen-activated protein kinase kinase kinase 4	Mechanistically, the mutant MAP3K1 has gain-of-function properties, ultimately leading to the hyperactivation of WNT that in turn crucially regulates sex determination and differentiation [17,105,120]	https://www.ncbi.nlm.nih.gov/pmc/articles/PMC8750206/
MALE	NEDD4	E3 ubiquitin-protein ligase Nedd-4	XY Nedd4-deficient mice exhibit complete male-to-female gonadal sex reversal shown by the ectopic upregulation of Foxl2 expression at the time of gonadal sex determination as well as insufficient upregulation of Sox9	https://www.nature.com/articles/s41419-022-04519-z
MALE	NGB	neuroglobin	involved in sex steroid signalling (oestrogen and androgen receptors)	https://onlinelibrary.wiley.com/doi/pdf/10.1111/ejn.14731?casa_token=nvgcVJbNIpwAAAAA:U3ZULwE5ezgZHIhiwiv73QhCDJY3aRTY281KOnfWmL9pq3PY43w0tl6AG4fPgxIOPe5LU5E77fwJSQ
MALE	PCBP3	Poly(rC)-binding protein 3	PCBP3 gene product poly(rC)-binding protein-3 play essential roles in post-transcriptional activities and RNA-binding proteome member in the elongation of round spermatids	https://www.tandfonline.com/doi/pdf/10.1080/19396368.2023.2225682?casa_token=HC6J3qzA3o4AAAAA:SW62vhpvsEw5XubMCNntE_aWKpPgMSbNx4FPmo_5lMCon5IbZTm_dswyNPxBNwR7LPLfqXBJR23y
MALE	PCNA	Proliferating cell nuclear antigen	involved in testis function	https://onlinelibrary.wiley.com/doi/pdf/10.1111/and.14441
MALE	PDI2	Protein disulfide-isomerase 2	X-linked protein coding gene, in C. elegans mutatins produce adult sterility,	https://elifesciences.org/articles/00808.pdf
MALE	PTEN	Phosphatidylinositol 3,4,5-trisphosphate 3-phosphatase and dual-specificity protein phosphatase PTEN	spermatogenesis: Develpoment of germ cells through stimulation of FSH secretion	https://www.sciencedirect.com/science/article/pii/S1642431X19302669?casa_token=f3uuxqq5Q0IAAAAA:k5gxRq94M4CmuzXzJWzftEeVpmI-6WAkbO19Op-nnwLcdIfCTGAR1PaJzcuMg15E0F8LUGCjdw
MALE	RAC1	Ras-related protein Rac1	Identification of sex determinants through single-cell sequencing	https://www.sciencedirect.com/science/article/pii/S1672022922000389
MALE	SOX	Transcription factor SOX-6	The sox family exists throughout the invertebrates and vertebrates and plays an important role in sex determination and differentiation, gonadal development	https://doi.org/10.1002/(SICI)1521-1878(199803)20:3<264::AID-BIES10>3.0.CO;2-1
MALE	SPER	Egg peptide speract receptor	Sperm-activating peptides in the regulation of ion fluxes, signal transduction and motility	https://ijdb.ehu.eus/article/072550ad
MALE	STAR	Steroidogenic acute regulatory protein, mitochondrial	The STAR protein, GLD-1, is a translational regulator of sexual identity in Caenorhabditis elegans	https://www.ncbi.nlm.nih.gov/pmc/articles/PMC1171120/
MALE	STAR5	StAR-related lipid transfer protein 5	sex steroid production was then assessed by analyzing expression of steroidogenic-related genes such as: steroidogenic acute regulatory protein (star);	https://onlinelibrary.wiley.com/doi/full/10.1002/mrd.23729?casa_token=4XUnsKzO2pEAAAAA%3ALl6eMIwKHYazj6ANSJENiqzffxgxALa198HtJfdtjtowvbM4eLeCBo19mM-EUhlpasLf1gNB3Wn5OtKy
MALE	TIP60	Histone acetyltransferase Tip60	The genes coding for the MYST family histone acetyltransferases, Tip60 and Mof, are expressed at high levels during sperm development	https://www.sciencedirect.com/science/article/pii/S1567133X07000427?casa_token=rnqG4i-wLAcAAAAA:arTdR9DdsbCS50Gmsm52pAh-EvGH84oldzTOkyrGUq4xsgVEXAeLX9LN2vnTtR5mNgUIkAySYkY
MALE	TRIM2	Tripartite motif-containing protein 2	Overexpressed in chicken male gonads	https://doi.org/10.1210/endocr/bqaa208
MALE	WDR12	Ribosome biogenesis protein WDR12	Biallelic mutations in WDR12 are associated with male infertility with tapered-head sperm	https://www.ncbi.nlm.nih.gov/pmc/articles/PMC10226492/
MALE	XPP3	Xaa-Pro aminopeptidase 3	XPP3 was the only protein with significant differential expression between male and female mice ICH, and it was downregulated in males at 6 h after injury compared to females.	https://link.springer.com/article/10.1007/s12975-018-0633-z
MALE	YBOX1	Y-box factor homolog	Sex-determining region Y box-containing genes	https://www.ncbi.nlm.nih.gov/pmc/articles/PMC6743626/
MALE	ZMYM1	Zinc finger MYM-type protein 1	Gene knockout of Zmym3 in mice arrests spermatogenesis at meiotic metaphase with defects in spindle assembly checkpoint	https://www.nature.com/articles/cddis2017228
FEMALE	ADRO	NADPH:adrenodoxin oxidoreductase	steroid biosynthetic process	https://doi.org/10.1002/jez.616
FEMALE	AP4E1	Adaptor Related Protein Complex 4 Subunit Epsilon 1	Z-specific genes	https://academic.oup.com/gbe/article/13/7/evab119/6288490?searchresult=1
FEMALE	CASP8	Caspase 8	Differentially expressed in chicken ovarian development	https://onlinelibrary.wiley.com/doi/abs/10.1111/asj.12979
FEMALE	CCNB	Cyclin B1	Our transcriptome data shows on average a 90-fold and 103-fold higher expression of ccnb1 in female zebrafish compared to males and juveniles, respectively. Ccnb1 is predicted to contribute to protein kinase activity and is involved in oocyte maturation.	https://link.springer.com/article/10.1007/s00204-020-02915-y
FEMALE	COG4	Component Of Oligomeric Golgi Complex 4	significantly differentially expressed between the male and female groups (female-biased)	https://www.ncbi.nlm.nih.gov/pmc/articles/PMC8920840/
FEMALE	DICER	Endoribonuclease Dicer	epletion of Dicer-1 (Dcr1), a key enzyme required for miRNA formation, resulted in sterile females exhibiting deep alterations in oocyte development	https://anatomypubs.onlinelibrary.wiley.com/doi/full/10.1002/dvdy.23924
FEMALE	FACD2	Fanconi anemia group D2 protein	accumulates on meiotic sex chromosomes	https://academic.oup.com/hmg/article/24/18/5234/687998?login=true
FEMALE	FRAS1	Fraser Extracellular Matrix Complex Subunit 1	sex or gonadal development	https://www.mdpi.com/1422-0067/21/5/1809
FEMALE	FUT10	Fucosyltransferase 10	We have demonstrated that the genes DOCK8, FUT10, PIGG and PSD3 can identify sex in paleognath birds	https://onlinelibrary.wiley.com/doi/10.1111/1755-0998.13381
FEMALE	GIMA4	GTPase, IMAP Family Member 4	very important as it positively affects the quality of sperm	https://www.e-jarb.org/journal/view.html?doi=10.12750/JARB.34.2.111
FEMALE	H2AX	H2A.X Variant Histone	H2AX is required for the chromatin remodeling and associated silencing in male meiosis	https://pubmed.ncbi.nlm.nih.gov/12689589/
FEMALE	HELLS	Helicase, Lymphoid Specifi	essential role for HELLS during male meiosis	https://academic.oup.com/biolreprod/article/84/6/1235/2530458?login=true
FEMALE	HELZ	Helicase With Zinc Finger	upregulated at dioestrus	https://jme.bioscientifica.com/view/journals/jme/34/3/0340889.xml
FEMALE	HFM1	Helicase For Meiosis 1	male infertility	https://link.springer.com/article/10.1007/s10815-023-02761-8
FEMALE	IFT27	Intraflagellar Transport 27	associated with the formation of the sperm flagellum	https://www.sciencedirect.com/science/article/pii/S004484862200761X?casa_token=ldKuEO5A9TEAAAAA:dJ0MEO2mVCyqxeUh-c1EjVKbUm5vXUBYvjSDcSJOe6aJOX4FZ6Mws-rNmSrbuI4BL9CWVurzsCM
FEMALE	INF2	Inverted Formin 2	Z chromosome	https://karger.com/cgr/article-abstract/117/1-4/103/62025/A-new-look-at-the-evolution-of-avian-sex?redirectedFrom=fulltext
FEMALE	IRE1	Endoplasmic Reticulum To Nucleus Signaling 1	directly involved in high-temperature-induced Nile tilapia masculinization	https://www.sciencedirect.com/science/article/pii/S0044848620302313?casa_token=Vz9RLg99qNYAAAAA:aeiI3ZlQjZKx6sM-ppMrmnsIUY57IVYwSYCyjxdnjiRQuViYJPouwlEQMmRBXYfNVEvVl4Ra0Wo
FEMALE	ITPR1	inositol 1,4,5-trisphosphate receptor type 1	enes with potential sex bias (females, CDK13, ITPR1	https://www.cell.com/ajhg/pdf/S0002-9297(19)30424-0.pdf
FEMALE	JKAMP	JNK1/MAPK8 Associated Membrane Protein	is required for ovary differentiation	https://link.springer.com/article/10.1007/s10126-013-9520-5
FEMALE	KAT2A	Lysine Acetyltransferase 2A	Turtle Sex Determination	https://karger.com/sxd/article-abstract/12/6/308/305227/Thermal-Response-of-Epigenetic-Genes-Informs
FEMALE	MCM2	Minichromosome Maintenance Complex Component 2	sex differentiation regulation in cucumber.	https://www.sciencedirect.com/science/article/pii/S0378111918312149?casa_token=wOJc4XVN9jUAAAAA:RkaBCLp2ajew_Lao37273aJQCQZ9nsxwJAHKKWG27Q1pZ40Axu7D9Htl2FF3XOyBSqIdA5WPaBg
FEMALE	MRNIP	MRN Complex Interacting Protein	essential for meiotic progression and spermatogenesis in mice	https://doi.org/10.1016/j.bbrc.2021.02.143
FEMALE	MUSK	Muscle Associated Receptor Tyrosine Kinase	expressed at higher levels in male chicken breast muscle than in female chicken breast muscle	https://era.ed.ac.uk/handle/1842/35522
FEMALE	NEMF	Nuclear Export Mediator Factor	Sex-linked loci in male snakeskin gourami	https://www.mdpi.com/2410-3888/6/4/43
FEMALE	NGB	Neuroglobin	involved in sex steroid signalling. female cerebral cortex.	https://onlinelibrary.wiley.com/doi/full/10.1111/ejn.14731?casa_token=SbaNuJDLLxUAAAAA%3ADyyHJzrvyeABTuPZRtIamZvIb3RYRXy6mhgKyHltr6va8xXFKi0baYnYBb2nw6ygowvI5oMqgKBu5qtx
FEMALE	NLRP3	NLR Family Pyrin Domain Containing 3	he nlrp3 gene encodes proteins containing a pyrin domain. It plays a role in the regulation of the immune response (Meng et al., 2009). However, a duplication of immune-related genes (irf9) on Y chromosome was found to participate in the sex determination in rainbow trout (Oncorhynchus mykiss) (Yano et al., 2012). What roles these genes in the sex-linked region play on sex determination need to b…	https://www.sciencedirect.com/science/article/pii/S004484862200566X?casa_token=D02OBOP0kOsAAAAA:fT0WtcNYWm-RnjPG-yFfX3Lkh01OUCmNbpV-_-55BGd5ZP637szujOdDf5lMMMP87BE1qc5i2QQ
FEMALE	NSA2	NSA2 Ribosome Biogenesis Factor	massive accumulation of ribosomes that maturing eggs normally store	https://academic.oup.com/genetics/article/213/2/529/5930589?login=false
FEMALE	NSUN2	NOP2/Sun RNA Methyltransferase 2	The Mouse Cytosine-5 RNA Methyltransferase NSun2 Is a Component of the Chromatoid Body and Required for Testis Differentiation. NSun2 is essential for germ cell differentiation in the mouse testis.	https://www.ncbi.nlm.nih.gov/pmc/articles/PMC3624257/
FEMALE	PIF1	PIF1 5'-To-3' DNA Helicase	sex differentiation and gonadal function	https://link.springer.com/article/10.1186/s12864-022-08632-3
FEMALE	PLCG1	Phospholipase C Gamma 1	Top 30 male up-regulated genes	https://academic.oup.com/biolreprod/article/91/6/153,%201-14/2434233?login=false
FEMALE	POL2	Gag-Pol polyprotein	related to X chromosome	https://academic.oup.com/genetics/article/203/4/1641/6065832?login=false
FEMALE	PSA	Puromycin-sensitive aminopeptidase	we analyzed structure and localization of three transcripts (psa, birc, and anubl1) with specific sex and family biases in the Manila clam Ruditapes philippinarum	https://onlinelibrary.wiley.com/doi/full/10.1002/jez.b.22520?casa_token=GUiFQdlz99kAAAAA%3AfD2m7EOblCl25CXO-GwztiO68v4sCS6uQQ-DZlcGIiMTS2lqsvRPfKJsfK60x7L7ztsHweaO-F0rxHzN
FEMALE	PTPRA	Protein Tyrosine Phosphatase Receptor Type A	xamples of these DE genes with increased expression were Capzb and Srgn in females, as well as Actb and Ptpra in males	https://link.springer.com/article/10.1186/s13293-020-00335-2
FEMALE	PTPRM	Protein Tyrosine Phosphatase Receptor Type M	we found that PTPRM on chromosome Z influences the upper eyelid coloboma phenotype of the Huoyan goose	https://www.mdpi.com/2076-2615/13/23/3608
FEMALE	SENP2	Sentrin-specific protease 2	Sumoylated SOX9 shows a diffuse subnuclear localisation, whereas desumoylated SOX9 (in the presence of SENP2 [SUMO (Sentrin)-specific protease-2]) displayed a punctuate pattern in the nucleus. SOX9 mutants lacking sumoylation sites also displayed a similar punctuate subnuclear localisation [48]. The diffuse distribution of sumoylated SOX9 correlates with an increase in SOX9 transcriptional activi…	https://www.sciencedirect.com/science/article/pii/S1043276008000891
FEMALE	SPER	Egg peptide speract receptor	Sperm-activating peptides in the regulation of ion fluxes, signal transduction and motility	https://ijdb.ehu.eus/article/072550ad
FEMALE	STAR	Steroidogenic acute regulatory protein,	The STAR protein, GLD-1, is a translational regulator of sexual identity in Caenorhabditis elegans.	https://www.ncbi.nlm.nih.gov/pmc/articles/PMC1171120/
FEMALE	TBX2	T-Box Transcription Factor 2	NO BUT TBX1 in T-Box Transcription Factor 2 of rainbow trout	https://onlinelibrary.wiley.com/doi/pdf/10.1002/mrd.21279?casa_token=qnHO_NBmWEkAAAAA:maML11NNKCNMX3w-WSNbbTYHPiJzgbicTtcst1gLGTUPxkQxmOzcEaO0ApCAiCCJlgV9xGNsa4quSg
FEMALE	UBB	Polyubiquitin-B	Polyubiquitin gene Ubb is required for upregulation of Piwi protein level during mouse testis development	https://www.nature.com/articles/s41420-021-00581-2
FEMALE	UBE2F	Ubiquitin Conjugating Enzyme E2 F	UBE2r is differentially expressed at different stages of the developing ovary and testis in penaeid shrimp Marsupenaeus japonicus	https://link.springer.com/article/10.1007/s11033-008-9291-7
FEMALE	UBE3A	Ubiquitin-protein ligase E3A	UBE3A as a SOX9-binding protein and proved that it functions as a ubiquitin ligase in relation to SOX9 (The transcription factor SOX9 has emerged as the master regulator of Sertoli cell differentiation during testis development and thus the crucial gene to determine sex.)	https://www.jbc.org/article/S0021-9258(20)55382-9/fulltext
FEMALE	WNT4	Wnt Family Member 4	Expressed in the gonads of both sexes before sex determination events take place and is subsequently down-regulated in the male gonad. Inactivation of the Wnt4 gene in mice has revealed that it is involved at several steps of female reproductive development.	https://www.ncbi.nlm.nih.gov/gene/54361
FEMALE	XPR1	Xenotropic And Polytropic Retrovirus Receptor 1	progesterone receptor required for Xenopus oocyte activation	https://www.pnas.org/doi/full/10.1073/pnas.250492197
FEMALE	ZBED1	Zinc Finger BED-Type Containing 1	Female-Biased Sexual Size Dimorphism in Cynoglossus semilaevis	https://www.mdpi.com/2079-7737/13/3/141
FEMALE	ZMYM3	Zinc Finger MYM-Type Containing 3	an essential role in metaphase to anaphase transition during mouse spermatogenesis by regulating the expression of diverse families of genes.	https://www.nature.com/articles/cddis2017228

## Sheet: C. Geodia_barretti
Sex Loci in	Gene_abbreviation	Gene_name	Function in sex determination	Paper
MALE	AADAT	Aminoadipate Aminotransferase	suggested that AADAT may also be involved in thyroid hormone metabolism	https://www.nature.com/articles/s41467-018-06356-1
MALE	BRWD1	Bromodomain And WD Repeat Domain Containing 1	Mouse BRWD1 is critical for spermatid postmeiotic transcription and female meiotic chromosome stability	https://rupress.org/jcb/article/208/1/53/37971/Mouse-BRWD1-is-critical-for-spermatid-postmeiotic
MALE	CLPX	Caseinolytic Mitochondrial Matrix Peptidase Chaperone Subunit X	ClpP/ClpX is required for maintaining mitochondrial functions in spermatocytes during meiosis and spermatogenesis.	https://www.biorxiv.org/content/10.1101/2022.12.16.520702v1.abstract
MALE	CRYL1	Crystallin Lambda 1	Blood transcriptome of Rasa Aragonesa rams with different sexual behavior phenotype reveals CRYL1 and SORCS2 as genes associated with this trait	https://academic.oup.com/jas/article-abstract/doi/10.1093/jas/skad098/7095688?redirectedFrom=fulltext&login=false
MALE	CYB	Cytochrome B	ytochrome b gene has been used for the identification of species [1], [2], [3], as well as for the discrimination of sex chromosome-specific genes to identify the gender [4], [5].	https://www.sciencedirect.com/science/article/pii/S0379073806000041?casa_token=2BVwn-Fj1XUAAAAA:Zr6oxv62YIrTX88o1bN8GE1_zgP4f4CRn6P8rVs5UBGavLELkI1gT3AJNYPQdLJ51-TIlfxMgw
MALE	DHRS4	Dehydrogenase/Reductase 4	ere over-expressed in all three breeds with a high androstenone level	https://www.tandfonline.com/doi/abs/10.1080/10495390903500607
MALE	DLDH	Dihydrolipoamide Dehydrogenase	dihidrolipoyl dehydrogenase (dldh), related to the maintenance of cell redox homeostasis, were found by both Knoll-Gellida et al. and Ziv et al. but could be detected only in the testis in the current study	https://link.springer.com/article/10.1007/s10695-010-9464-x
MALE	DTWD2	DTW Domain Containing 2	The expression levels of two genes, DTWD2 and LOC431648, on the Z chromosome were analyzed by quantitative polymerase chain reaction	https://www.nature.com/articles/s41598-017-10943-5
MALE	ETFB	Electron Transfer Flavoprotein Subunit Beta	en loci showing complete sex linkage aligned to this region of Chromosome 20 (specifically within an intron of the gene Etfb, which also shows male biased coverage indicative of a Y‐specific duplication event).	https://www.ncbi.nlm.nih.gov/pmc/articles/PMC10083969/
MALE	FANCJ	DNA helicase	Fancj GT/GT mutants are fertile, but their testes are very much smaller than wild-type littermates, predominantly as a result of impeded spermatogonial proliferation and mildly increased apoptosis during testis development in the fetus.	https://link.springer.com/article/10.1007/s00412-015-0549-2
MALE	FAT2	FAT Atypical Cadherin 2	Genes that were differentially expressed between genders included BNC1, FAT2, FOXA1, and HOXA11. FOXA1 has been shown to play a role for sexual dimorphism in liver cancer.	https://link.springer.com/article/10.1186/s12864-017-3906-0
MALE	GLNA2	Type-1 glutamine synthetase 2	sperm production	https://www.cell.com/iscience/pdf/S2589-0042(23)00283-3.pdf
MALE	HSDL2	hydroxysteroid dehydrogenase-like2	involved in steroid biosynthesis and metabolism, and play a crucial role in mammalian physiology and development, including sex determination and differentiation	https://europepmc.org/backend/ptpmcrender.fcgi?accid=PMC7064643&blobtype=pdf
MALE	IGF1R	Insulin-Like Growth Factor 1 Receptor	This study showed that insulin/IGF signaling is absolutely essential for sex determination and testis differentiation in mice,	https://www.ncbi.nlm.nih.gov/pmc/articles/PMC6770468/
MALE	LIN41	Protein lin-41	one of the major roles of the mir-35 family is to act as a developmental timer, preventing premature and aberrant decision-making in the sex determination pathway. Through a partially maternal effect, the mir-35 family acts on multiple levels of the sex determination pathway to prevent the spurious activation of male developmental programs. At least two predicted mir-35 family target genes, suppr…	https://genesdev.cshlp.org/content/31/4/422.full
MALE	METH	Methionine synthase	this result indicates that the metH gene is responsible for the increase in C. elegans fecundity.	https://www.mdpi.com/1422-0067/23/9/5003
MALE	PHB2	Prohibitin-2	A role in spermatogenesis was suggested in Eriocheir sinensis (Chinese mitten crab) and Octopus tankahkeei spermatogenesis	https://www.sciencedirect.com/science/article/pii/S0378111915003376?casa_token=1Mt1T_bRI84AAAAA:AlwyVoyprwmclj7hPGJy96ojKGPDkYMcygTQ1k8vykkWHyj_Y7R0M0usUJ4Fi5HiTtknB-IlkQ
MALE	PTER	Phosphotriesterase Related	Table 3-11 Human chromosome location of gene localised to snake Z and W chromosome	https://espace.curtin.edu.au/bitstream/handle/20.500.11937/75666/Harris%20R%202018.pdf?sequence=1&isAllowed=y
MALE	PTPRA	Protein Tyrosine Phosphatase Receptor Type A	Examples of these DE genes with increased expression were Capzb and Srgn in females, as well as Actb and Ptpra in males	https://link.springer.com/article/10.1186/s13293-020-00335-2
MALE	RBM48	RNA Binding Motif Protein 48	Rbm48 mRNA expression in the developing mouse cortex/hippocampus is female-biased.	https://www.sciencedirect.com/science/article/abs/pii/S0736574819301145
MALE	RTJK	RNA-directed DNA polymerase from mobile element jockey	with fertility traits within the RTJK, a functional retrotransposon in the fish genome, was the candidate gene for sex-determination in fish (Faber-Hammond et al. 2015).	https://www.tandfonline.com/doi/full/10.1080/00071668.2022.2096402?casa_token=4vBo4kqB9AwAAAAA%3AQb0-borGOf9U8QQoje47sxodWM1UVDXABzjVSpz5vlsJ07CGaZCD7wZTz1tlzenbdzPnl6QINduR
MALE	RTXE	RTX toxin secretion ATP-binding protein	more in transcript abundance in ovaries compared with testes (top of list) or vice versa (bottom of list)	https://www.sciencedirect.com/science/article/pii/S0378432018307760?casa_token=cxGuG33gA1EAAAAA:HIWnx6hBjR3H2m9fQWoAtQ8hM8fvAWAp5TmgjUytKVMUfU5o8yH1l1Pto5Cw1r1gLRlRJ5tkAQ
MALE	SCRIB	Scribble Planar Cell Polarity Protein	The data presented here emphasize the somatic requirement of Scrib, Dlg and Lgl in embryonic gonads, as well as in the Drosophila testis that underlines the importance of the somatic lineage in the establishment and maintenance of testis formation throughout successive developmental stages.	https://d1wqtxts1xzle7.cloudfront.net/61960338/2013-dlg-scrib-lgl20200201-120839-2q7lx0-libre.pdf?1580573013=&response-content-disposition=inline%3B+filename%3DThe_internal_structure_of_embryonic_gona.pdf&Expires=1683284110&Signature=dEhzHLNE8AJLsO0s-KmbGbQvLer4ubZPqRysdJFu-eqWUzRplbEZZJSGUAQ1RdkokjyC~zTNVk5-lmb5z4qW63AZi-6LzrYUc8LF64xxfUGyZUEzRUvsS1rzhS340KUVBl1xZr8FNj96PQAiyU5verHmdcCN-ZePdfW~B…
MALE	SRK2	Tyrosine-protein kinase SRK2	showed a steady state expression in all developmental stages (3.59 to 5.19 fold) in male bud	https://www.sciencedirect.com/science/article/pii/S0378111917304377
MALE	TDX	tetraticopeptide domain-containing thioredoxin	A model is suggested for mammalian male determination based on interactions postulated to occur among an autosomal repressor gene, an X-linked male-determining gene termed Tdx, and multiple copies of certain DNA sequences on the Y chromosome that do not code for any protein.	https://pubmed.ncbi.nlm.nih.gov/6584708/
MALE	TGM4	Transglutaminase 4 2	Tgm4 knockout males show normal sperm count, sperm motility, and reproductive morphology. However, very little of their ejaculate migrates into the female's reproductive tract, suggesting the plug prevents ejaculate leakage.	https://www.ncbi.nlm.nih.gov/pmc/articles/PMC3547826/
MALE	TOP1	DNA Topoisomerase I	In the male germline, Top1 is highly enriched at the paired rDNA loci on sex chromosomes suggesting that it might participate in regulating their segregation during meiosis.	https://www.ncbi.nlm.nih.gov/pmc/articles/PMC8661406/
MALE	XDH	Xanthine Dehydrogenase	Sex-biased gene study in the tail of guppy has revealed that several male-biased genes encoded proteins with pigment biosynthesis functions (e.g. kita, kitb, mitfa, mitfb, tyrp1b, dct and xdh)	https://bmcgenomics.biomedcentral.com/articles/10.1186/s12864-019-5722-1
MALE	YBOXH	Y-box factor homolog	Sex-determining region Y box-containing genes	https://www.ncbi.nlm.nih.gov/pmc/articles/PMC6743626/
FEMALE	GIN1	Gypsy retrotransposon integrase-like protein 1	Surprisingly, one type of Gypsy element, which was similar to Ogre elements known from legumes, was almost absent on the Y chromosome but otherwise uniformly distributed on all chromosomes.	https://link.springer.com/article/10.1007/s10577-008-1254-2
FEMALE	GATA4	Transcription factor GATA-4	GATA-4 contributes to fetal male gonadal development by regulating genes mediating Müllerian duct regression and the onset of testosterone production. GATA-2 expression appears to be sexually dimorphic being transiently expressed in the germ cell lineage of the fetal ovary but not the fetal testis.	https://pubmed.ncbi.nlm.nih.gov/14681544/
FEMALE	CELR1	Cadherin EGF LAG seven-pass G-type receptor 1	Sex-Based Genetic Association Study Identifies CELSR1 as a Possible Chronic Obstructive Pulmonary Disease Risk Locus among Women	https://pubmed.ncbi.nlm.nih.gov/27854507/
FEMALE	DHB8	(3R)-3-hydroxyacyl-CoA dehydrogenase	Also known as hsd17b8: The expression of ovary differentiation genes, including foxl2 and hsd17b8. 17-beta-hydroxysteroid dehydrogenase that can regulate the concentration of biologically active estrogens and androgens. Transcriptome analysis reveals higher expression levels of star2, cyp11a1, cyp17a2, hsd3b1, hsd17b8, hsd17b12a2, hsd17b14 and cyp19a1a in XX than in XY gonads at 5 days after hatc…	https://www.frontiersin.org/articles/10.3389/fendo.2021.756530/full
FEMALE	RTJK	RNA-directed DNA polymerase from mobile element jockey	Also called SPRY4: Numerous genes with a male-specific expression have not previously been described as sexually dimorphic, including the transcription factor Etv5, an intracellular FGF receptor antagonist Spry4 and the metalloproteinase Adamts16	https://www.sciencedirect.com/science/article/pii/S0012160605006020
FEMALE	CSTFT	Cleavage stimulation factor subunit 2 tau variant	Tau variant of the cleavage stimulation factor polyadenylation protein CSTF2	https://www.sciencedirect.com/science/article/pii/S0014482704001272?casa_token=r5Q5mZ4RcfoAAAAA:SFSeh8BBM4W9cBGdmF0-WCN7eLuf6sVGLItIfd2cMRhAbC1u1r9f5VIUqnnDI0kyT9_RNEwd760
FEMALE	ADH1	Alcohol dehydrogenase class-P	Sex linkages are found with the ACON-1 locus in R. sphenocephala and with five loci, the A1b, F16DP, ADH-2, PGM-1 and β-GLU loci, in R. berlandieri (Wright et al., 1983)	https://www.sciencedirect.com/science/article/pii/S0305049100002042?casa_token=WpIl3UahcgwAAAAA:p9fwPejpfkyKDkZOhJcQFPmVY5T1k8n1ncLvqT3OQ8mCQ3m7JVL4-LvmKlJHuPpx-MVzimhv5_k

## Sheet: D. Geodia_hentscheli
Sex Loci in	Gene_abbreviation	Gene_name	Function in sex determination	Paper
MALE	ACON	Aconitate hydratase, mitochondrial	the cytoplasmic isozyme of aconitase is Z-linked in the guinea fowl	https://www.nature.com/articles/296763a0
MALE	AGO2	Protein argonaute-2	AGO4 Regulates Entry into Meiosis and Influences Silencing of Sex Chromosomes in the Male Mouse Germline	http://dx.doi.org/10.1016/j.devcel.2012.07.003
MALE	APC4	Anaphase Promoting Complex Subunit 4	The four signature piRNAs and their target genes were involved in sex-related pathways. Oocyte meiosis and progesterone-mediated oocyte maturation were female-inclined pathways. Furthermore, the four piRNAs and most of their target genes (smc1a, espl1, anapc4, ccnb1, ppp2r5d, adcy9, ppp2r5b, pik3cb, itpr3, cul1, camk2a, camk2b, cdc25b, pik3r3, fbxo43, itpr2, map2k1, pde3b, and fbxw11) were involv…	https://www.mdpi.com/1422-0067/24/4/3438
MALE	CCD39	Coiled-coil domain-containing protein 39	Several genes are associated with the multiple morphological abnormalities of the sperm flagella (MMAF) syndrome, including QRICH2, CFAP43, CFAP44, CFAP69, CCDC39, and AKAP4 genes.	https://www.sciencedirect.com/science/article/pii/S0378111920304479?casa_token=Nc_295EsM7wAAAAA:nk6Og39-iU1yLSda6kqfBZQdhS_nam-OFs5Daq1DgCsm1oCXfJtJEBDtTkuiA06t9TxOoSQl9g
MALE	CIRBP	Cold Inducible RNA Binding Protein	Here we present multiple lines of evidence linking CIRBP to sex determination in the snapping turtle, Chelydra serpentina	https://academic.oup.com/genetics/article/203/1/557/5930309?login=false
MALE	COG2	Component Of Oligomeric Golgi Complex 2	COG-2, a Sox domain protein necessary for establishing a functional vulval- uterine connection in Caenorhabditis elegans	https://journals.biologists.com/dev/article/126/1/169/40214/COG-2-a-Sox-domain-protein-necessary-for
MALE	DIAP1	Death-associated inhibitor of apoptosis 1	Up-regulated genes in ovary	https://bmcgenomics.biomedcentral.com/articles/10.1186/s12864-019-6157-4
MALE	DLG1	Discs Large MAGUK Scaffold Protein 1	Close to the sex-associated marker Sma-USC30 several candidate genes were identified (sox2, dnajc19, fxr1, atp11b, fkbp2 and dlg1), but eventually discarded because no association to sex was detected at the species level, so the SD gene remains unidentified in turbot	https://bmcgenomics.biomedcentral.com/articles/10.1186/s12864-015-2142-8
MALE	ECHD2	Enoyl-CoA Hydratase Domain Containing	Two homeobox genes, one TALE (EcHD-2) and one typical one (EcHD-1), are found linked on chromosome X in E. cuniculi	https://link.springer.com/article/10.1007/s00427-002-0287-3
MALE	EFTU	Tu Translation Elongation Factor, Mitochondrial	but could be detected only in the testis in the current study. This may be due to the different sampling strategies (isolated follicles vs. whole ovarian tissue)	https://link.springer.com/article/10.1007/s10695-010-9464-x
MALE	FGFR1	fibroblast growth factor receptor 1	GFR1, FGFR3 and FGFR4 were found in somatic and germ cells throughout both XY and XX gonads at 11.5 dpc, indicating that they could have a role in gonad formation	https://journals.biologists.com/dev/article/131/15/3627/42510/Fgf9-induces-proliferation-and-nuclear
MALE	FGFR2	fibroblast growth factor receptor 2	The nuclear localization of FGFR2 coincides with the initiation of Sry expression and the nuclear localization of SOX9 during the early differentiation of Sertoli cells and the determination of male fate	https://journals.biologists.com/dev/article/131/15/3627/42510/Fgf9-induces-proliferation-and-nuclear
MALE	FPPS	Farnesyl Diphosphate Synthase	n testis, genes with significant G × T effects on expression included those coding for proteins related to reproductive functions: the protamine ProtB homologue LOC101887804; the asunder (asun) homologue LOC101899763; the sarah (sra) homologue LOC101894442, and the Farnesyl pyrophosphate synthase (Fpps) homologue LOC101896699	https://onlinelibrary.wiley.com/doi/full/10.1111/mec.16148?casa_token=4pc9anPnIekAAAAA%3Ai2u7ICHAXCJntlLy8K5LuGUDe5_zmE-uZL9Hadoi0VPwm788INOj0Gn4bBxB-KkgmQ_MsTMo2o0QsPk
MALE	FRAS1	Fraser Extracellular Matrix Complex Subunit 1	We postulate that a requirement for expression of Frem2 and Fras1 in NSICs early in gonadogenesis may contribute to the ambiguous genitalia phenotype seen in this model. This finding supports the idea that NSICs, not just Sertoli and FLCs, may play an important role in masculinization during fetal life.	https://academic.oup.com/biolreprod/article/92/6/145,%201-17/2434117?login=false
MALE	FTCD	Formimidoyltransferase Cyclodeaminase	DEGs associated with sex differentiation and high-temperature treatment. esta downregu	https://www.sciencedirect.com/science/article/pii/S0044848620302313?casa_token=lOe7VSLbt7YAAAAA:Kk7Mj9DP-yuZ4S7OObzYZnm4Qbun4aQVK97G0PSyQQzpwuY-B0eKq3xlHM1GjOA15MwUHWa20w
MALE	GCP4	Tubulin Gamma Complex Associated Protein 4	These results showed that genes highly expressed in polychaete-fed shrimp were different between testes and vas deferens. For example, heterogeneous nuclear ribonucleoprotein u-like protein 1 isoform 5 (HNRPUL1), gamma-tubulin complex component 4 (GCP4), pyridoxal phosphate phosphatase (PLP), and inorganic phosphate cotransporter (PiT) were upregulated in testes	https://link.springer.com/article/10.1007/s10126-017-9738-8
MALE	GGA1	Golgi Associated, Gamma Adaptin Ear Containing, ARF Binding Protein 1	The syntenic block homologous with GGA1 has been previously reported as being a part of sex chromosomes in skinks [19], also under male heterogamety	https://www.mdpi.com/2075-1729/10/12/342
MALE	HELZ2	Helicase With Zinc Finger 2	Table 5. The genes whose expression changes significantly with age in both sexes, and are differentially expressed between lens epithelial cells from aged female mice and male mice.	https://www.sciencedirect.com/science/article/pii/S0014483521002426?casa_token=D7RlrGu84K0AAAAA:80GtLOjLnFxXM3SB_R2utadhpFZIfPE8cb4zHPc2nX2m1DUT0rdkQ_qfOMP49A-r1wXCoUTbDw
MALE	HMCN1	Hemicentin 1	Hemicentin-1 (Hmcn1) is a matricellular immunoglobin. We found that Hmcn1 is expressed in all studied cell types besides XY supporting cells. This protein was claimed to be responsible for organization of tissues (Vogel and Hedgecock, 2001) and thus might be also key for establishing the gonadal structure.¿¿¿???	https://academic.oup.com/mbe/article-abstract/37/3/799/5618730?login=false
MALE	KCMF1	Potassium Channel Modulatory Factor 1	Known and newly identified G. gallus, A. platyrhynchos, and M. gallopavo W-linked coding genes	https://academic.oup.com/evolut/article/68/11/3281/6852164?login=false
MALE	KIF14	Kinesin Family Member 14	involved with sexual maturation	https://bmcresnotes.biomedcentral.com/articles/10.1186/1756-0500-3-215
MALE	LIN41	Protein lin-41	one of the major roles of the mir-35 family is to act as a developmental timer, preventing premature and aberrant decision-making in the sex determination pathway. Through a partially maternal effect, the mir-35 family acts on multiple levels of the sex determination pathway to prevent the spurious activation of male developmental programs. At least two predicted mir-35 family target genes, suppr…	https://genesdev.cshlp.org/content/31/4/422.full
MALE	LRP2	LDL receptor related protein 2	LRP2 is postulated to be involved in the development of reproductive organ by regulating the uptake of androgen and estrogen bound to the sex-steroid binding globulin in reproductive tissues (Willnow et al., 2007).	https://www.frontiersin.org/articles/10.3389/fgene.2019.00298/full
MALE	LRP3	LDL Receptor Related Protein 3	sexual growth differences.	https://link.springer.com/article/10.1007/s10142-018-0595-y
MALE	MP2K1	Mitogen-Activated Protein Kinase Kinase 1	Up-regulated genes in females	https://www.sciencedirect.com/science/article/pii/S0378111918308187?casa_token=2roUYqe76yYAAAAA:2AMK3343jvYoy08Nl2oxOb4NqOAWTKyIyOdfv459OG-kCtHBNurACvLk7eUw6QvkjeGACp-QKA
MALE	MP2K2	Mitogen-Activated Protein Kinase Kinase 2	nvolved with sexual maturation	https://bmcresnotes.biomedcentral.com/articles/10.1186/1756-0500-3-215
MALE	NDRG3	NDRG Family Member 3	The stimulation of ndrg3 are both needed at the beginning of spermatogenesis in different fish species	https://www.sciencedirect.com/science/article/pii/S1095643314002566?casa_token=dQKQj_MwBxAAAAAA:X9AHjXr_4UZ25UqcQrJk0YnK0HrFc6UBwIkQ_BDuR795kr3qA7hWJZgUxwThmF2JVmftRLZyUA
MALE	NEUL4	Neuralized-like protein 4	Previous studies have shown that Neurl4 is required for initial steps of germplasm assembly during gametogenesis in Drosophila	https://onlinelibrary.wiley.com/doi/full/10.1111/andr.12897
MALE	NU155	Nucleoporin 155	Nup154 was required in testes for cyst formation, control of spermatocyte proliferation and meiotic progression.	https://rupress.org/jcb/article/142/5/1195/15805/Nup154-a-New-Drosophila-Gene-Essential-for-Male
MALE	OXSM	3-Oxoacyl-ACP Synthase, Mitochondrial	ignificantly higher in male compared to female hearts,	https://journals.plos.org/plosone/article?id=10.1371/journal.pone.0117047
MALE	PAL1	Phenylalanine ammonia-lyase 1	Changes in expression levels during the female and male flowering process indicated the important role of PAL genes in sex determination and resistance adaptation.	https://www.mdpi.com/2073-4425/10/1/46
MALE	PALS1	Protein Associated With LIN7 1, MAGUK P55 Family Member	Inguinal adipose DEGs affected by sex-biasing factors and the associated GO/KEGG pathways	https://www.researchgate.net/profile/Xia-Yang-5/publication/359838736_Relative_contributions_of_sex_hormones_sex_chromosomes_and_gonads_to_sex_differences_in_tissue_gene_regulation/links/636ea5d4431b1f53008dfd38/Relative-contributions-of-sex-hormones-sex-chromosomes-and-gonads-to-sex-differences-in-tissue-gene-regulation.pdf
MALE	PMS2	PMS1 Homolog 2, Mismatch Repair System Component	PMS2-deficient males are infertile, producing only abnormal spermatozoa.	https://reader.elsevier.com/reader/sd/pii/0092867495903186?token=BAFFBEF44653F01B8A36AABC4BB95E40B11AC5CCCCE8BAD15EBB83262192730387F191433F91D1E20AF0B3D3BD438616&originRegion=eu-west-1&originCreation=20230518093431
MALE	PNKD	PNKD metallo-beta-lactamase domain containing	ranscripts in bold are newly identified sexually dimorphic expressed transcripts in SSCs that were not identified in Sf1-EGFP positive XX and XY somatic cells isolated from E11.5 gonads	https://academic.oup.com/biolreprod/article/82/2/380/2558011?login=false
MALE	PPR36	Protein phosphatase 1 regulatory subunit 36	It has been identified as biomarker of teratozoospermia and azoospermia	https://www.mdpi.com/2073-4425/13/10/1721
MALE	PRDX3	Peroxiredoxin 3	Various redox related genes were downregulated from stage 6 to 12 in ZZf embryos but not in ZW embryos, including GLRX and PRDX3 [	https://journals.plos.org/plosgenetics/article?id=10.1371/journal.pgen.1009465
MALE	PRKDC	Protein Kinase, DNA-Activated, Catalytic Subunit	Cd151, Dab2, Klk8, Meg3, and Prkdc are novel sexually dimorphic autosomal genes.	https://www.sciencedirect.com/science/article/pii/S0006899314003655?casa_token=ym5Gumg-XUMAAAAA:5eeymiemlQQ4j5BECQSf0FkeE6oLpjW98S8B91cGKZMRKjB2i8W80DXBH6d2lq7ZwuHbLNJHkw
MALE	RAB13	Ras-related protein Rab-13	List of sex-related DEGs at 70–100 dph, 2Y in males compared with corresponding females.	https://www.sciencedirect.com/science/article/pii/S0044848622011012?casa_token=T_OqYUv0oE4AAAAA:7BtF3hRLC8ByJsNanekX4l-RrjSxtc5kNqfL9Js_TCONYKJ0SfgUL8OZEo3RUeKDgB1y1ri0xA
MALE	RSAD1	Radical S-Adenosyl Methionine Domain Containing 1	RSAD1 have been identified as potential new candidate genes for cCSC specifically in females, the RSAD1 gene is associated with intrinsic sexual dimorphism of the cortisol response.	https://www.ncbi.nlm.nih.gov/pmc/articles/PMC9843580/
MALE	SBNO2	Strawberry Notch Homolog 2	Gender-specific SBNO2 and VPS13B as a potential driver of osteoporosis development in male ankylosing spondylitis??	https://link.springer.com/article/10.1007/s00198-020-05593-9
MALE	SCLY	Selenocysteine Lyase	differentially expressed between the male and female group (it is up in females)	https://www.ncbi.nlm.nih.gov/pmc/articles/PMC8920840/
MALE	TDX	tetraticopeptide domain-containing thioredoxin	for testis-determining gene on the X chromosome)	https://link.springer.com/chapter/10.1007/978-3-540-47783-9_17
MALE	UBR7	Ubiquitin Protein Ligase E3 Component N-Recognin	sperm morphology abnormalities	https://www.sciencedirect.com/science/article/pii/S0093691X19303711?casa_token=cILn7nOrMYIAAAAA:BF_SUt46J56xBbkgdKXyVl5x7WUk9IR9ybcXcovptq4M-PaG5YQ1MWG2q1xtjSIFozraWntIKg
MALE	UPP2	Uridine Phosphorylase 2	The SNPs of genes such as RYR2, UPP2, and the androgen receptor gene have been shown to have sex-biasing factors in both girls and boys diagnosed with ASD	https://link.springer.com/article/10.1007/s11682-015-9504-3
FEMALE	ACSF3	Acyl-CoA synthetase family member 3	FEMALE biased gene in Drosophila suzukii	https://academic.oup.com/g3journal/article/12/8/jkac127/6588685?login=false
FEMALE	FBX11	F-box only protein 11	Fbx11 only appeared at sexual development and all stress conditions in Aspergillus nidulans.	https://journals.plos.org/plosgenetics/article?id=10.1371/journal.pgen.1010502

## Sheet: E. Phakellia_ventilabrum
Sex Loci in	Gene_abbreviation	Gene name	Function in sex determination	Paper
MALE	DAPP1	Dual Adaptor Of Phosphotyrosine And 3-Phosphoinositides 1	No very clear	https://www.nature.com/articles/s41437-023-00642-5
MALE	EPHB1	Ephrin type-B receptor 1	We also analysed genes with an expression profile similar to SOX9 (P2; clear sexual dimorphism and peak of expression in 7 PCW testes), such as EPH receptor B1 (EPHB1), fetal and adult testis expressed 1 (FATE1),	https://academic.oup.com/humrep/article/35/5/1099/5837511
MALE	FGFR1	Fibroblast growth factor receptor 1	nuclear localization of FGFR2 coincides with the initiation of Sry expression and the nuclear localization of SOX9 during the early differentiation of Sertoli cells and the determination of male fate.	https://d1wqtxts1xzle7.cloudfront.net/101996900/3627-libre.pdf?1683581192=&response-content-disposition=inline%3B+filename%3DFgf9induces_proliferation_and_nuclear_lo.pdf&Expires=1710592169&Signature=PG1tDkKAZU6QBs-Uzvr8l9ypmk2XCE00-PGc4Ho70XvOGv2iFniGy3S7egIUdBgpYMWDJEAvJkMoICWtNVnl0vcbGmcVbADiQHx2oxxS5eO0Yq19c6quG2IqZW5jFlITuVKTpKDyg3GDfCeIl~sWpN3Qghok55u~KsK1fUxkIm56KqrwkvalwKCC0bgmIWSF7zoEIQpG…
MALE	FUMH	Fumarate Hydratase	sex-linked inheritance of fumarate hydratase alleles (FUMH) in natricine snakes.	https://citeseerx.ist.psu.edu/document?repid=rep1&type=pdf&doi=d78ad29353efb096f2115a6505298454a9b62dfb
MALE	FZD7	Frizzled Class Receptor 1	Fzd1 is required for normal female fertility and may act in part to regulate oocyte maturation and cumulus cell function	https://academic.oup.com/biolreprod/article/87/5/104,%201-12/2513829?login=false
MALE	G2E3	G2/M-Phase Specific E3 Ubiquitin Protein Ligase	located within the candidate sex determination region	https://link.springer.com/article/10.1186/s12864-022-08632-3
MALE	LRP2	LDL Receptor Related Protein 2	LRP2 acts as an endocytic receptor for sex hormone‐binding globulin (SHBG). Lrp2−/− mice showed defects in specific sex hormone‐dependent developmental processes, including testicular descent and vaginal opening	https://onlinelibrary.wiley.com/doi/pdfdirect/10.1002/humu.24325
MALE	MCM6	Minichromosome Maintenance Complex Component 6	sex differentiation regulation in cucumber	https://www.sciencedirect.com/science/article/pii/S0378111918312149
MALE	MEIG1	Meiosis/Spermiogenesis Associated 1	triangle sail mussel (Hyriopsis cumingii)	https://www.frontiersin.org/journals/physiology/articles/10.3389/fphys.2022.961773/full
MALE	RS16	Ribosomal Protein S16	sex-dimorphic gene in birds	https://www.ncbi.nlm.nih.gov/pmc/articles/PMC10510239/
MALE	SKI2	Superkiller complex protein 2	There are prokaryotic homologs of 21 of the 29 meiotic genes (i.e., Spo11, Mre11, Rad50, Rad1, Dmc1, Rad51, Mer3, Msh2-6, Mlh1-3, Pms1, Smc1-6 are orthologs of prokaryotic Top6a, SbcD, SbcC, Ercc4, RecA, Ski2)	https://journals.plos.org/plosone/article?id=10.1371/journal.pone.0002879
MALE	S29A4	Slc29a4- solute carrier family 29 member 4	Estradiol reduced 5-HT reuptake by downregulating the gene expression of Plasma Membrane Monoamine Transporter (PMAT, Slc29a4) through estrogen receptor β and the MAPK/ERK signaling pathway	https://www.sciencedirect.com/science/article/pii/S001429992200200X
MALE	SPAG1	Sperm-associated antigen 1	Role in fertilization and sex reversal of Monopterus	https://journals.plos.org/plosone/article?id=10.1371/journal.pone.0173974
MALE	TRNK1	Trank1-tetratricopeptide repeat and ankyrin repeat containing 1	Novel genes identified as being highly expressed in enriched Sertoli cells: Trank1	https://academic.oup.com/biolreprod/article/92/6/145,%201-17/2434117
MALE	RAD52	DNA repair protein RAD52 homolog 1	RAD21, SPO11-2, RAD51-A, RAD51-B and RAD51-C were upregulated during meiosis in sexual diatoms and is essential for spermatogenesis in mice	https://link.springer.com/article/10.1186/s12864-015-1983-5, https://www.nature.com/articles/s41420-022-00921-w
FEMALE	VPS4B	Vacuolar protein sorting-associated protein 4B	only five genes had Y-specific SNPs on the exons, including lama3, vps4b, kiaa1614, tal1 and pfpdz1	https://academic.oup.com/nsr/article/10/2/nwac239/6779693
FEMALE	HAP2	Hapless 2	the GCS1/HAP2 gene is specifically expressed in sperm cells, and the mutant fails to fuse with both egg and central cells	https://link.springer.com/article/10.1007/s10265-017-0908-6
FEMALE	SVEP1	Sushi, von Willebrand factor type A, EGF and pentraxin domain-containing protein 1	gene Hsp11 and Svep1, were overexpressed in the ovaries and significantly associated with Foxl2	https://link.springer.com/article/10.1186/s12864-018-4756-0
FEMALE	TMCO3	Transmembrane and coiled-coil domain-containing protein 3	TMCO2 was predominantly associated with the inner acrosomal membrane in spermatids and caput epididymal spermatozoa	https://onlinelibrary.wiley.com/doi/full/10.1002/mrd.23396?casa_token=YprLWPFMEbgAAAAA%3AlEueO6JEiTOuT61EpWmh-lshf0BgQwEOjgLyJfCcxoXUrUIIE0CMbQDd2vigkde1qjd3SBsFYxSCWxEA
FEMALE	M3K4	Mitogen-activated protein kinase kinase kinase 4	overexpression of Map3k4 from a functional BAC transgene has been shown to rescue an Sry deficit in the classical mouse sex reversal mutation T-associated sex reversal (Tas) by re-establishing robust levels of Sry	https://rep.bioscientifica.com/view/journals/rep/163/6/REP-21-0443.xml
FEMALE	CSMD2	CUB and sushi domain-containing protein 2	CSMD1 is enriched at the germ-cell/somatic-cell interface in both male and female gonads	https://www.nature.com/articles/s41467-019-12522-w
FEMALE	UBR2	Unhealthy ribosome biogenesis protein 2 homolog	UBR2-deficient spermatocytes fail to induce the ubiquitination of H2A during meiosis.	https://www.pnas.org/doi/abs/10.1073/pnas.0910267107
FEMALE	FANCJ	Fanconi anemia group J protein homolog	Zebrafish has a single ortholog of each human FANC gene and unexpectedly, mutations in at least two of them (fancl and fancd1(brca2)) lead to female-to-male sex reversal	https://www.sciencedirect.com/science/article/pii/B9780123813206000205?casa_token=0rfusFN2JHQAAAAA:f1dlDt0OxUIpuaqOKiGeF7WUF9-MEpE2tIzvnzxt1SP5Gs-COvM_Jqo8R-wCMYxFfs-CGkY-PwI

## Sheet: F. Axinella_damicornis
Sex Loci in	Gene_abbrev	Gene_name	Function in sex determination	Paper
MALE	FEM1B	Protein fem-1 homolog B	Null mutants for Fem1b generated by gene targeting display defects in prostate ductal morphogenesis and secretory protein expression	https://anatomypubs.onlinelibrary.wiley.com/doi/pdf/10.1002/dvdy.21694
MALE	FEM1C	Protein fem-1 homolog C	FEM1C which is highly conserved from Caenorhabditis elegans to higher vertebrates and interacts with the sex determining pathway in C. elegans. We found that FEM1C is located on the Z and W chromosome of zebra finches and probably other Passerine birds, but shows only Z linkage in other avian orders.	https://link.springer.com/article/10.1007/s00412-008-0199-8
MALE	PRKDC	DNA-dependent protein kinase catalytic subunit	androgen synthesis	https://link.springer.com/article/10.1007/s00441-019-03165-w
MALE	RTBS	Probable RNA-directed DNA polymerase from transposon BS	ovary differentiation snakeskin gourami	https://www.ncbi.nlm.nih.gov/pmc/articles/PMC7090014/
MALE	FEM1A	Protein fem-1 homolog A	In C. elegans, fem-1 is involved in a pathway necessary for sex determination.	https://www.sciencedirect.com/science/article/abs/pii/S0378111901007569

## Sheet: G. Halichondria_panicea
Gene_Abbrev	Gene_name	Function in sex determination	Paper
MALE	NHL1	ortholog to TRIM45	In C. elegans, NHL-2 is required for embryonic polarity, asymmetric cell division, and sex determination (Hyenne et al. 2008; McJunkin and Ambros 2017)	http://www.genesdev.org/cgi/doi/10.1101/gad.290155.116
FEMALE	4EBP2	Eukaryotic Translation Initiation Factor 4E Binding Protein 2	Other mechanisms may potentially modulate the extent of assembly of eIF4G·eIF4E in hearts from male animals fed a diet containing ethanol.	https://journals.physiology.org/doi/full/10.1152/ajpregu.00203.2006
FEMALE	AAK1	AP2 Associated Kinase 1	which could be at an initial phase of differentiation as sex chromosome.	https://www.mdpi.com/1422-0067/20/20/5111
FEMALE	ASPG	Asparaginase	Asparaginase (aspg) is a coding enzyme protein classified as MEG in the frog and the sea bass but as FEG in the turtle	https://www.ncbi.nlm.nih.gov/pmc/articles/PMC10844511/
FEMALE	AVR2B	Activin A Receptor Type 2B	The BMP5:BMR1A:AVR2B and MDK:PTPRZ1 ligand-receptor interactors also showed 811 XX-biased mean expression	https://www.biorxiv.org/content/10.1101/2024.02.19.581036v2.full.pdf
FEMALE	BMS1	BMS1 Ribosome Biogenesis Factor	Six X-specific genes of Coleonyx elegans (bms1, ddx28, dusp16, lrit1, lrit2, mansc4)	https://www.mdpi.com/2075-1729/10/12/342
FEMALE	CE164	Centrosomal Protein 164	These genes and chromosomes linked to sex in Arctic Char provide additional information regarding sex determination and heterochiasmy within the salmonids.	https://onlinelibrary.wiley.com/doi/full/10.1111/mec.14217?casa_token=peftFxG15sgAAAAA%3AKve9m1vk1Lk1PtSDdBnxjmkmwh_SEpauAmzL36Cb1n0mQgh8a7rCTQJlT-gI2GKE8W5AMqMuYT5JAOcS
FEMALE	DHX35	DEAH-Box Helicase 35	DExD/H-box RNA helicase genes are differentially expressed between males and females during the critical period of male sex differentiation in channel catfish	https://www.sciencedirect.com/science/article/pii/S1744117X17300254?casa_token=kcfBJaJd9KEAAAAA:EoPBPjOmgsGHWVkxkAOkd8u9_MVcTvqetXQMHC7ewqr6jMsIF_mvZH3_mUn8SPKIliGtm-_LT0g
FEMALE	DHX9	DExH-Box Helicase 9	DExD/H-box RNA helicase genes are differentially expressed between males and females during the critical period of male sex differentiation in channel catfish	https://www.sciencedirect.com/science/article/pii/S1744117X17300254?casa_token=kcfBJaJd9KEAAAAA:EoPBPjOmgsGHWVkxkAOkd8u9_MVcTvqetXQMHC7ewqr6jMsIF_mvZH3_mUn8SPKIliGtm-_LT0g
FEMALE	DOC11	Dedicator Of Cytokinesis 11	it was found that the genomic coverage of many genes (e.g., btk, dock11, enox2, f8, faah2, klhl13, LOC100559614, lpar4, etc.) in the female Asian grass lizards (Takydromus sexlineatus) was half that in males, indicating Z-linkage [24].	https://www.mdpi.com/2076-2615/13/13/2180
FEMALE	MEPCE	Methylphosphate Capping Enzyme	Highly expressed Prdx4, arf1, Nrip1, and Lfng genes in EF fish are involved in ovarian follicle development and oocyte maturation (Qian et al. 2016; Zhou et al. 2015; White et al. 2000; Hahn et al. 2005), whereas high expressions of Mepce, Atrip, and Spata22 in EM are related to germ cell proliferation and meiosis onset	https://link.springer.com/article/10.1007/s10695-021-00932-x
FEMALE	MRCKA	CDC42 binding protein kinase alpha	MALE STERILITY IN DROSOPHILA	https://onlinelibrary.wiley.com/doi/full/10.1111/andr.13009
FEMALE	MRP4	ATP Binding Cassette Subfamily C Member 4 (PEL Blood Group)	growth related	https://www.frontiersin.org/journals/genetics/articles/10.3389/fgene.2019.00298/full
FEMALE	NOM1	Nucleolar Protein With MIF4G Domain 1	dmrt3, nom1, abce1, and pkmyt1 play key roles in gonadal sex determination in Acrossocheilus fasciatus	https://link.springer.com/article/10.1007/s10499-022-00976-7
FEMALE	PCSK6	Proprotein Convertase Subtilisin/Kexin Type 6	We detected the expression of Nov and Pcsk6 in Xenopus gonads but these genes did not show a sexual dimorphism of expression	https://link.springer.com/article/10.1007/s00427-019-00630-y
FEMALE	PTPRA	Protein Tyrosine Phosphatase Receptor Type A	Examples of these DE genes with increased expression were Capzb and Srgn in females, as well as Actb and Ptpra in males	https://link.springer.com/article/10.1186/s13293-020-00335-2
FEMALE	RB11A	RAB11A, Member RAS Oncogene Family	Differentially abundant proteins in the hippocampus from 100-day old male and female foetuses identified by SWATH-MS.	https://www.sciencedirect.com/science/article/pii/S1874391919301630?casa_token=5udzIea1-aoAAAAA:N7ytVftjktpKfjeGw5TtRqHx3iralkAUZP9ePCyn1l1qi1ECVYKiNd3_INLbxbeWUcRZvtq0Vvs
FEMALE	RTBS	Putative RNA-directed DNA polymerase from transposon BS	top 10 female-biased	https://www.nature.com/articles/s41598-020-61738-0
FEMALE	S12A6	Solute Carrier Family 12 Member 6	hypothalamus of female mice	https://www.biorxiv.org/content/10.1101/2022.09.24.509319v1.full.pdf
FEMALE	SLX1	Structure-specific endonuclease subunit slx1	In mice, Sly – Slx/Slx1 are sex-chromosome genes	https://link.springer.com/article/10.1186/s12915-022-01338-8
FEMALE	SVEP1	Sushi, Von Willebrand Factor Type A, EGF And Pentraxin Domain Containing 1	overexpressed in the ovaries	https://link.springer.com/article/10.1186/s12864-018-4756-0
FEMALE	TRAF3	TNF Receptor Associated Factor 3	significant in female-specific analysis.	https://academic.oup.com/hmg/article/28/15/2600/5429588?login=false
FEMALE	TRET1	Trehalose transporter 1-1	male-biased in D. melanogaster	https://academic.oup.com/g3journal/article/12/8/jkac127/6588685?login=false
FEMALE	ZNFX1	Zinc Finger NFX1-Type Containing 1	male sex determination in mammals	https://link.springer.com/chapter/10.1007/978-3-319-94139-4_6
FEMALE	RAD51	DNA repair protein RAD51 homolog 1	RAD21, SPO11-2, RAD51-A, RAD51-B and RAD51-C were upregulated during meiosis in sexual diatoms and is essential for spermatogenesis in mice	https://link.springer.com/article/10.1186/s12864-015-1983-5, https://www.nature.com/articles/s41420-022-00921-w
