# Supplementary material for: Sponge genomes reveal a pre-metazoan origin of the sex determination toolkit and sex chromosomes
Source: Research Square preprint supplement (doi:10.21203/rs.3.rs-8554461/v1), 2026-02-12
Supplement: Supplementary file 15 [file 867662aa275da0aba612d8d1.xlsx]

## Sheet: Sheet1
	sp6.ID	sp5.ID	sp4.ID	sp3.ID	sp2.ID	sp1.ID	sp1.Chr	sp1.Start	sp1.End	sp1.Index	sp2.Chr	sp2.Start	sp2.End	sp2.Index	sp3.Chr	sp3.Start	sp3.End	sp3.Index	sp4.Chr	sp4.Start	sp4.End	sp4.Index	sp5.Chr	sp5.Start	sp5.End	sp5.Index	sp6.Chr	sp6.Start	sp6.End	sp6.Index	clust	sex_gene_sp1	sex_gene_sp2	sex_gene_sp3	sex_gene_sp4	sex_gene_sp5	sex_gene_sp6	sex_all	Blast_description
130	Hpan_g1310.t1	Adami_g3054.t1	PHAVENT1A020035P1	Petfic_v00_mik.OX345642.1G68.1	Choren_v00_mik.OX359200.1G899.1	Osclob_v00_mik.OX382152.1G733.1	3	2682855	2691662	849	12	6368450	6379571	1040	7	252179	260035	82	21	1798459	1819384	360	11	1816699	1830831	351	10	9367	18682	4	b	0	1	0	0	0	0	choren	IPO4	1
315	Hpan_g15033.t1	Adami_g3198.t1	PHAVENT1A013383P1	Petfic_v00_mik.OX345642.1G128.1	Choren_v00_mik.OX359200.1G881.1	Osclob_v00_mik.OX382152.1G657.1	3	2394710	2395799	753	12	6235777	6238327	1016	7	525066	526728	136	21	64603	68575	11	11	3107763	3111055	525	9	1081203	1082860	210	b	0	1	0	0	0	0	choren	PSA7L	1
323	Hpan_g15221.t1	Adami_g3220.t1	PHAVENT1A020211P1	Petfic_v00_mik.OX345642.1G240.1	Choren_v00_mik.OX359200.1G891.1	Osclob_v00_mik.OX382151.1G1001.1	2	3648115	3649864	1147	12	6312423	6332988	1032	7	1268346	1285244	272	21	533931	544985	147	11	3288719	3298481	550	9	2387175	2396700	424	0	0	1	0	0	0	0	choren	PLGT2	1
458	Hpan_g3328.t1	Adami_g2971.t1	PHAVENT1A003130P1	Petfic_v00_mik.OX345649.1G313.1	Choren_v00_mik.OX359200.1G936.1	Osclob_v00_mik.OX382152.1G1000.1	3	3576690	3577274	1172	12	6628147	6631181	1106	14	2046720	2050601	378	21	4854405	4856380	712	11	1119310	1121430	248	12	2702550	2703286	418	b	0	1	0	0	0	0	choren	MSS4	1
543	Hpan_g4857.t1	Adami_g4048.t1	PHAVENT1A002906P1	Petfic_v00_mik.OX345650.1G678.1	Choren_v00_mik.OX359199.1G591.1	Osclob_v00_mik.OX382160.1G137.1	11	336022	339367	119	11	4505016	4508233	706	15	5077505	5079903	813	19	23225	25805	6	12	94911	97440	12	14	42421	43998	12	0	0	1	0	0	0	0	choren	ACMSD	1
552	Hpan_g4971.t1	Adami_g4243.t1	PHAVENT1A004038P1	Petfic_v00_mik.OX345650.1G561.1	Choren_v00_mik.OX359199.1G725.1	Osclob_v00_mik.OX382162.1G565.1	13	2272716	2278445	657	11	5281886	5293807	864	15	4125668	4155030	666	19	2308913	2346299	321	12	1682728	1706637	263	14	923945	943547	142	b	0	1	0	0	0	0	choren	MYO10	1
553	Hpan_g4994.t1	Adami_g4250.t1	PHAVENT1A008227P1	Petfic_v00_mik.OX345650.1G708.1	Choren_v00_mik.OX359199.1G563.1	Osclob_v00_mik.OX382162.1G150.1	13	490873	492040	162	11	4297983	4300014	672	15	5253161	5256475	847	19	4393541	4397474	493	12	1740225	1745223	272	14	1204556	1206682	166	b	0	1	0	0	0	0	choren	HOP2	1
557	Hpan_g5059.t1	Adami_g4218.t1	PHAVENT1A007594P1	Petfic_v00_mik.OX345650.1G568.1	Choren_v00_mik.OX359199.1G620.1	Osclob_v00_mik.OX382162.1G569.1	13	2300663	2303186	663	11	4731623	4739679	739	15	4200468	4212149	675	19	1356349	1362946	243	12	1371113	1379780	229	14	1973347	1980309	240	b	1	1	0	0	0	0	choren	OXSR1	2
559	Hpan_g5079.t1	Adami_g4135.t1	PHAVENT1A005024P1	Petfic_v00_mik.OX345650.1G696.1	Choren_v00_mik.OX359199.1G666.1	Osclob_v00_mik.OX382162.1G71.1	13	165873	169631	73	11	5055573	5063740	803	15	5137860	5141135	829	19	327308	330670	88	12	657035	660361	121	14	2089012	2091667	261	b	0	1	0	0	0	0	choren	DCTN2	1
563	Hpan_g5215.t1	Adami_g4259.t1	PHAVENT1A018445P1	Petfic_v00_mik.OX345650.1G707.1	Choren_v00_mik.OX359199.1G601.1	Osclob_v00_mik.OX382162.1G41.1	13	103375	103822	46	11	4570024	4570867	718	15	5249736	5250556	845	19	4308812	4326383	482	12	1813106	1814529	282	14	3269466	3273141	416	b	0	1	0	0	0	0	choren	RL37A	1
564	Hpan_g5229.t1	Adami_g4264.t1	PHAVENT1A017027P1	Petfic_v00_mik.OX345650.1G591.1	Choren_v00_mik.OX359199.1G532.1	Osclob_v00_mik.OX382162.1G171.1	13	556002	560649	186	11	4100625	4120059	634	15	4428371	4459250	698	19	4172549	4247344	463	12	1846559	1854879	288	14	3386836	3409681	432	b	0	1	0	0	0	0	choren	PTN4	1
569	Hpan_g5300.t1	Adami_g4320.t1	PHAVENT1A014803P1	Petfic_v00_mik.OX345650.1G787.1	Choren_v00_mik.OX359199.1G515.1	Osclob_v00_mik.OX382162.1G530.1	13	2167752	2170103	606	11	3927845	3933173	618	15	5520883	5523256	934	19	4507769	4517651	509	12	2271772	2278885	354	14	4150905	4159940	516	b	0	1	0	0	0	0	choren	BARD1	1
573	Hpan_g5510.t1	Adami_g4413.t1	PHAVENT1A010828P1	Petfic_v00_mik.OX345650.1G540.1	Choren_v00_mik.OX359199.1G584.1	Osclob_v00_mik.OX382162.1G31.1	13	64695	70453	31	11	4450284	4454699	695	15	3965234	3972713	640	19	5608393	5615836	652	12	3262044	3273332	470	14	6002806	6030300	755	b	0	1	0	0	0	0	choren	RGAP1	1
696	Hpan_g6853.t1	Adami_g8020.t1	PHAVENT1A017972P1	Petfic_v00_mik.OX345646.1G364.1	Choren_v00_mik.OX359189.1G239.1	Osclob_v00_mik.OX382159.1G378.1	10	1364050	1369480	428	1	1182445	1189070	283	11	2631608	2652606	449	23	5591985	5595336	723	2	18868670	18880329	1854	16	995025	1000471	282	0	0	1	0	0	0	0	choren	CDC5L	1
698	Hpan_g6870.t1	Adami_g8135.t1	PHAVENT1A003003P1	Petfic_v00_mik.OX345646.1G10.1	Choren_v00_mik.OX359189.1G134.1	Osclob_v00_mik.OX382160.1G220.1	11	688343	694811	241	1	558743	560594	155	11	62855	64242	16	23	5549237	5552038	704	2	20062896	20067459	1993	16	1044288	1045827	300	i	0	1	0	0	0	0	choren	RPF2	1
699	Hpan_g6875.t1	Adami_g8140.t1	PHAVENT1A021681P1	Petfic_v00_mik.OX345646.1G12.1	Choren_v00_mik.OX359189.1G130.1	Osclob_v00_mik.OX382160.1G217.1	11	694859	695981	242	1	560671	562453	156	11	72004	73376	21	23	5562957	5564678	712	2	20087898	20090008	1999	16	1056981	1058028	306	i	0	1	0	0	0	0	choren	GPN2	1
700	Hpan_g6877.t1	Adami_g8142.t1	PHAVENT1A001705P1	Petfic_v00_mik.OX345646.1G14.1	Choren_v00_mik.OX359189.1G76.1	Osclob_v00_mik.OX382152.1G138.1	3	475491	483716	165	1	289292	298977	88	11	75675	86681	26	23	5565858	5578312	716	2	20092626	20117237	2001	16	1059887	1079285	309	0	0	1	0	0	0	0	choren	ASCC3	1
933	Hpan_g9889.t1	Adami_g12339.t1	PHAVENT1A010655P1	Petfic_v00_mik.OX345640.1G1022.1	Choren_v00_mik.OX359199.1G736.1	Osclob_v00_mik.OX382152.1G372.1	3	1158174	1159249	420	11	5358326	5360053	878	5	8463400	8466061	1211	6	886278	895430	141	5	7253283	7266354	777	2	8492807	8494336	1470	b	0	1	0	0	0	0	choren	RAB24	1
1	Hpan_g10082.t1	Adami_g16769.t1	PHAVENT1A011116P1	Petfic_v00_mik.OX345636.1G1314.1	Choren_v00_mik.OX359195.1G640.1	Osclob_v00_mik.OX382150.1G555.1	1	1944979	1947882	663	7	5023326	5024792	731	1	12239425	12244844	1466	12	2993349	2994824	393	9	3071021	3072964	309	3	1495196	1496074	194	0	0	0	0	0	0	0	no	#N/A	0
2	Hpan_g10084.t1	Adami_g16781.t1	PHAVENT1A017569P1	Petfic_v00_mik.OX345636.1G1376.1	Choren_v00_mik.OX359195.1G102.1	Osclob_v00_mik.OX382167.1G201.1	18	594234	595154	220	7	648104	650922	108	1	12790661	12797942	1534	12	2995238	2998238	394	9	3167341	3173723	321	3	1505605	1507099	196	g	0	0	0	0	0	0	no	#N/A	0
3	Hpan_g10086.t1	Adami_g16795.t1	PHAVENT1A008965P1	Petfic_v00_mik.OX345636.1G1374.1	Choren_v00_mik.OX359193.1G255.1	Osclob_v00_mik.OX382168.1G328.1	19	1497492	1498569	373	5	1165437	1169725	299	1	12780046	12788613	1533	12	3079010	3082103	401	9	3379180	3383453	338	3	1527145	1528876	198	0	0	0	0	0	0	0	no	#N/A	0
4	Hpan_g10131.t1	Adami_g16841.t1	PHAVENT1A000101P1	Petfic_v00_mik.OX345636.1G1423.1	Choren_v00_mik.OX359195.1G252.1	Osclob_v00_mik.OX382168.1G436.1	19	1962384	1965492	518	7	1642383	1651565	299	1	13126071	13138973	1592	12	753752	761125	148	9	4051032	4061560	393	3	1986350	1992579	248	g	0	0	0	0	0	0	no	#N/A	0
6	Hpan_g10184.t1	Adami_g16671.t1	PHAVENT1A018573P1	Petfic_v00_mik.OX345636.1G1239.1	Choren_v00_mik.OX359195.1G635.1	Osclob_v00_mik.OX382168.1G459.1	19	2055543	2057709	549	7	4979881	4987567	723	1	11570600	11578537	1380	12	2094861	2098400	311	9	2022784	2024518	195	3	2384822	2386251	305	g	0	0	0	0	0	0	no	#N/A	0
7	Hpan_g10216.t1	Adami_g16891.t1	PHAVENT1A014795P1	Petfic_v00_mik.OX345636.1G1903.1	Choren_v00_mik.OX359195.1G216.1	Osclob_v00_mik.OX382153.1G983.1	4	3461904	3463305	1117	7	1367562	1371296	254	1	17782815	17806414	2143	12	908138	911554	165	9	4815116	4823080	453	3	2754029	2756403	340	0	0	0	0	0	0	0	no	#N/A	0
8	Hpan_g10237.t1	Adami_g2008.t1	PHAVENT1A000435P1	Petfic_v00_mik.OX345653.1G423.1	Choren_v00_mik.OX359191.1G984.1	Osclob_v00_mik.OX382165.1G403.1	16	2056585	2057299	486	3	7936843	7938129	1160	18	3502904	3508764	513	11	5412878	5432777	454	10	193011	199978	44	3	2897680	2901672	363	h	0	0	0	0	0	0	no	#N/A	0
9	Hpan_g10285.t1	Adami_g2372.t1	PHAVENT1A000176P1	Petfic_v00_mik.OX345653.1G156.1	Choren_v00_mik.OX359191.1G1010.1	Osclob_v00_mik.OX382165.1G307.1	16	1775378	1775827	386	3	8123116	8124004	1189	18	930466	931227	198	11	5986767	5988675	518	10	5272423	5276882	471	3	3224537	3226170	418	h	0	0	0	0	0	0	no	#N/A	0
10	Hpan_g10314.t1	Adami_g2440.t1	PHAVENT1A023048P1	Petfic_v00_mik.OX345653.1G32.1	Choren_v00_mik.OX359196.1G563.1	Osclob_v00_mik.OX382165.1G211.1	16	1285428	1286907	258	8	4616921	4617897	670	18	172011	172663	42	11	5701033	5702177	495	10	6705547	6714843	552	3	3491766	3513952	455	0	0	0	0	0	0	0	no	#N/A	0
11	Hpan_g10348.t1	Adami_g17413.t1	PHAVENT1A015869P1	Petfic_v00_mik.OX345636.1G3281.1	Choren_v00_mik.OX359195.1G778.1	Osclob_v00_mik.OX382168.1G303.1	19	1463617	1465813	361	7	5975427	5979534	887	1	27765532	27787131	3665	12	6641204	6649481	719	9	13034736	13042128	1032	3	3941018	3946789	494	g	0	0	0	0	0	0	no	#N/A	0
12	Hpan_g10357.t1	Adami_g17346.t1	PHAVENT1A019329P1	Petfic_v00_mik.OX345641.1G842.1	Choren_v00_mik.OX359195.1G735.1	Osclob_v00_mik.OX382168.1G360.1	19	1631902	1633268	431	7	5676590	5690797	839	6	6962123	6963663	975	12	4953596	4954939	546	9	12326565	12327924	958	3	4031334	4032997	504	g	0	0	0	0	0	0	no	#N/A	0
13	Hpan_g10407.t1	Adami_g2012.t1	PHAVENT1A005080P1	Petfic_v00_mik.OX345653.1G400.1	Choren_v00_mik.OX359191.1G991.1	Osclob_v00_mik.OX382165.1G405.1	16	2061313	2062171	490	3	7933299	7934799	1157	18	3315957	3321949	484	11	5364662	5368422	450	10	224355	226562	49	3	4418950	4421179	563	h	0	0	0	0	0	0	no	#N/A	0
14	Hpan_g10437.t1	Adami_g2034.t1	PHAVENT1A000373P1	Petfic_v00_mik.OX345653.1G168.1	Choren_v00_mik.OX359191.1G1144.1	Osclob_v00_mik.OX382165.1G380.1	16	1991804	1992963	468	3	8777607	8780620	1357	18	966428	969065	207	11	3949449	3952195	318	10	839172	840980	76	3	4710188	4712624	597	h	0	0	0	0	0	0	no	#N/A	0
15	Hpan_g10496.t1	Adami_g2210.t1	PHAVENT1A016445P1	Petfic_v00_mik.OX345653.1G74.1	Choren_v00_mik.OX359191.1G1164.1	Osclob_v00_mik.OX382165.1G308.1	16	1777886	1779710	389	3	8908582	8910196	1380	18	422345	426698	95	11	5033546	5036071	420	10	2745625	2749144	279	3	5255263	5257585	660	h	0	0	0	0	0	0	no	#N/A	0
16	Hpan_g10527.t1	Adami_g2229.t1	PHAVENT1A019772P1	Petfic_v00_mik.OX345653.1G120.1	Choren_v00_mik.OX359191.1G1058.1	Osclob_v00_mik.OX382165.1G386.1	16	1993058	1994979	469	3	8328577	8330265	1237	18	639799	641590	147	11	6888644	6890080	662	10	3194622	3198482	302	3	5641652	5642522	695	h	0	0	0	0	0	0	no	#N/A	0
17	Hpan_g10530.t1	Adami_g2222.t1	PHAVENT1A009031P1	Petfic_v00_mik.OX345653.1G185.1	Choren_v00_mik.OX359191.1G975.1	Osclob_v00_mik.OX382165.1G353.1	16	1880612	1882363	431	3	7846117	7847674	1139	18	1062643	1065498	230	11	6910960	6912807	665	10	3142767	3144778	291	3	5660160	5661638	698	h	0	0	0	0	0	0	no	#N/A	0
18	Hpan_g10555.t1	Adami_g2276.t1	PHAVENT1A021026P1	Petfic_v00_mik.OX345653.1G135.1	Choren_v00_mik.OX359191.1G1210.1	Osclob_v00_mik.OX382165.1G406.1	16	2072624	2077289	495	3	9160491	9166317	1435	18	778815	791289	163	11	6984468	6996818	680	10	4000093	4018383	354	3	5867591	5876995	725	h	0	0	0	0	0	0	no	#N/A	0
19	Hpan_g10568.t1	Adami_g1999.t1	PHAVENT1A002668P1	Petfic_v00_mik.OX345653.1G147.1	Choren_v00_mik.OX359191.1G863.1	Osclob_v00_mik.OX382153.1G532.1	4	1924749	1925675	600	3	7306674	7308124	1011	18	880750	894029	189	11	7048188	7050838	698	10	121463	129607	35	3	5959996	5963563	738	0	0	0	0	0	0	0	no	#N/A	0
20	Hpan_g10593.t1	Adami_g2751.t1	PHAVENT1A023478P1	Petfic_v00_mik.OX345653.1G268.1	Choren_v00_mik.OX359191.1G874.1	Osclob_v00_mik.OX382165.1G426.1	16	2139682	2141377	521	3	7329529	7332478	1018	18	1769898	1782497	336	11	2969829	2975956	260	10	12900033	12908591	908	3	6128539	6132995	766	h	0	0	0	0	0	0	no	#N/A	0
21	Hpan_g10666.t1	Adami_g2626.t1	PHAVENT1A013451P1	Petfic_v00_mik.OX345653.1G16.1	Choren_v00_mik.OX359191.1G933.1	Osclob_v00_mik.OX382165.1G253.1	16	1472160	1474095	311	3	7659449	7668750	1091	18	92474	95811	17	11	3015178	3028342	265	10	10790984	10812614	768	3	6757570	6759962	851	h	0	0	0	0	0	0	no	#N/A	0
22	Hpan_g10669.t1	Adami_g2629.t1	PHAVENT1A006696P1	Petfic_v00_mik.OX345653.1G15.1	Choren_v00_mik.OX359198.1G515.1	Osclob_v00_mik.OX382161.1G543.1	12	2176046	2177271	625	10	4174003	4176746	611	18	97868	100444	19	11	3046014	3052215	268	10	10824561	10829930	771	3	6763788	6765726	855	f	0	0	0	0	0	0	no	#N/A	0
24	Hpan_g10682.t2	Adami_g2121.t1	PHAVENT1A003015P1	Petfic_v00_mik.OX345636.1G5152.1	Choren_v00_mik.OX359191.1G1030.1	Osclob_v00_mik.OX382165.1G153.1	16	1090134	1093097	198	3	8220175	8223322	1210	1	43691584	43703831	5751	11	6696112	6712371	618	10	1968628	1979002	175	3	6855686	6859691	868	h	0	0	0	0	0	0	no	#N/A	0
25	Hpan_g10684.t1	Adami_g2096.t1	PHAVENT1A017689P1	Petfic_v00_mik.OX345653.1G406.1	Choren_v00_mik.OX359191.1G1229.1	Osclob_v00_mik.OX382165.1G469.1	16	2277020	2288355	570	3	9232434	9236391	1454	18	3392044	3404512	497	11	6719585	6728950	620	10	1540163	1551586	146	3	6873613	6884467	873	h	0	0	0	0	0	0	no	#N/A	0
27	Hpan_g10693.t1	Adami_g2113.t1	PHAVENT1A018648P1	Petfic_v00_mik.OX345653.1G217.1	Choren_v00_mik.OX359191.1G1275.1	Osclob_v00_mik.OX382165.1G358.1	16	1898977	1900342	440	3	9397672	9399055	1505	18	1379342	1383027	274	11	6452095	6458070	580	10	1826255	1830784	165	3	6956610	6958461	884	h	0	0	0	0	0	0	no	#N/A	0
29	Hpan_g10705.t1	Adami_g2249.t1	PHAVENT1A015956P1	Petfic_v00_mik.OX345653.1G158.1	Choren_v00_mik.OX359191.1G1208.1	Osclob_v00_mik.OX382165.1G507.1	16	2393190	2394074	611	3	9155048	9156196	1430	18	942132	943558	202	11	7063790	7064979	704	10	3409047	3414919	324	3	7027715	7029597	900	h	0	0	0	0	0	0	no	#N/A	0
30	Hpan_g10719.t1	Adami_g1998.t1	PHAVENT1A020847P1	Petfic_v00_mik.OX345653.1G128.1	Choren_v00_mik.OX359191.1G1239.1	Osclob_v00_mik.OX382165.1G333.1	16	1849284	1851473	417	3	9269815	9274474	1468	18	743407	753813	155	11	6829538	6833897	651	10	116191	121248	34	3	7156464	7160925	917	h	0	0	0	0	0	0	no	#N/A	0
32	Hpan_g10767.t1	Adami_g2382.t1	PHAVENT1A021795P1	Petfic_v00_mik.OX345653.1G43.1	Choren_v00_mik.OX359191.1G1240.1	Osclob_v00_mik.OX382153.1G475.1	4	1754592	1756151	540	3	9277318	9277992	1470	18	225476	226795	54	11	5712174	5714952	498	10	5424574	5433927	482	3	7432356	7434611	977	0	0	0	0	0	0	0	no	#N/A	0
33	Hpan_g10789.t1	Adami_g1985.t1	PHAVENT1A009076P1	Petfic_v00_mik.OX345653.1G130.1	Choren_v00_mik.OX359191.1G1200.1	Osclob_v00_mik.OX382165.1G402.1	16	2084004	2084779	500	3	9116702	9118153	1425	18	775982	777208	162	11	6557119	6561652	594	10	54437	56014	16	3	7671120	7671926	1001	h	0	0	0	0	0	0	no	#N/A	0
34	Hpan_g10795.t1	Adami_g1979.t1	PHAVENT1A012142P1	Petfic_v00_mik.OX345653.1G155.1	Choren_v00_mik.OX359191.1G1008.1	Osclob_v00_mik.OX382165.1G249.1	16	1469977	1471578	309	3	8083335	8085208	1185	18	920770	924122	196	11	6605181	6611603	602	10	31032	32941	10	3	7693167	7694918	1007	h	0	0	0	0	0	0	no	#N/A	0
35	Hpan_g10798.t1	Adami_g1982.t1	PHAVENT1A019703P1	Petfic_v00_mik.OX345653.1G154.1	Choren_v00_mik.OX359191.1G1191.1	Osclob_v00_mik.OX382157.1G673.1	8	2754109	2757055	775	3	9024698	9028844	1408	18	910282	915244	192	11	6591001	6599077	599	10	37620	43337	13	3	7698291	7704018	1010	0	0	0	0	0	0	0	no	#N/A	0
36	Hpan_g10805.t1	Adami_g2003.t1	PHAVENT1A013922P1	Petfic_v00_mik.OX345653.1G173.1	Choren_v00_mik.OX359191.1G1257.1	Osclob_v00_mik.OX382165.1G344.1	16	1907695	1909764	443	3	9338113	9342502	1485	18	994706	1003993	214	11	7005840	7011658	687	10	159101	169449	39	3	7717310	7723780	1017	h	0	0	0	0	0	0	no	#N/A	0
37	Hpan_g10840.t1	Adami_g2171.t1	PHAVENT1A000282P1	Petfic_v00_mik.OX345653.1G199.1	Choren_v00_mik.OX359191.1G1273.1	Osclob_v00_mik.OX382165.1G422.1	16	2123766	2124543	513	3	9385411	9387738	1502	18	1232995	1235021	252	11	4457243	4461570	368	10	2359195	2365366	236	3	8168506	8170345	1058	h	0	0	0	0	0	0	no	#N/A	0
38	Hpan_g10847.t1	Adami_g2158.t1	PHAVENT1A013387P1	Petfic_v00_mik.OX345653.1G211.1	Choren_v00_mik.OX359198.1G914.1	Osclob_v00_mik.OX382165.1G399.1	16	2063687	2065652	492	10	6889896	6895426	1102	18	1364838	1372429	271	11	5569767	5583349	473	10	2205910	2212909	219	3	8211491	8215244	1071	0	0	0	0	0	0	0	no	#N/A	0
39	Hpan_g10859.t1	Adami_g2141.t1	PHAVENT1A007999P1	Petfic_v00_mik.OX345653.1G62.1	Choren_v00_mik.OX359191.1G1262.1	Osclob_v00_mik.OX382159.1G343.1	10	1219747	1221218	390	3	9355733	9357771	1489	18	332024	333610	78	11	6107440	6109902	539	10	2125642	2128228	199	3	8323947	8325302	1085	0	0	0	0	0	0	0	no	#N/A	0
40	Hpan_g10864.t1	Adami_g2127.t1	PHAVENT1A003572P1	Petfic_v00_mik.OX345653.1G30.1	Choren_v00_mik.OX359191.1G1132.1	Osclob_v00_mik.OX382165.1G477.1	16	2302946	2303993	576	3	8702905	8704981	1330	18	156425	157777	38	11	6148736	6151295	547	10	2025645	2029774	181	3	8342890	8344449	1090	h	0	0	0	0	0	0	no	#N/A	0
41	Hpan_g10866.t1	Adami_g2128.t1	PHAVENT1A007522P1	Petfic_v00_mik.OX345653.1G329.1	Choren_v00_mik.OX359191.1G1025.1	Osclob_v00_mik.OX382160.1G235.1	11	709709	711913	254	3	8190929	8194230	1203	18	2641773	2648799	411	11	6141136	6146744	545	10	2029823	2034300	182	3	8345861	8350405	1093	0	0	0	0	0	0	0	no	#N/A	0
42	Hpan_g10896.t1	Adami_g2262.t1	PHAVENT1A022599P1	Petfic_v00_mik.OX345653.1G176.1	Choren_v00_mik.OX359191.1G1189.1	Osclob_v00_mik.OX382158.1G247.1	9	830797	832855	302	3	9009963	9014078	1403	18	1024927	1031294	220	11	6964708	6969957	676	10	3684909	3698288	339	3	8456784	8460739	1126	h	0	0	0	0	0	0	no	#N/A	0
43	Hpan_g10904.t1	Adami_g4063.t1	PHAVENT1A014272P1	Petfic_v00_mik.OX345639.1G100.1	Choren_v00_mik.OX359196.1G844.1	Osclob_v00_mik.OX382153.1G825.1	4	2953709	2956830	940	8	6032717	6035048	1020	4	472084	475325	114	24	126552	129815	15	12	175286	181411	32	4	19970	21176	3	a	0	0	0	0	0	0	no	#N/A	0
44	Hpan_g10919.t1	Adami_g3160.t1	PHAVENT1A016464P1	Petfic_v00_mik.OX345649.1G185.1	Choren_v00_mik.OX359196.1G75.1	Osclob_v00_mik.OX382157.1G438.1	8	1916141	1916995	510	8	363127	365107	83	14	960883	962833	217	10	6966214	6972747	847	11	2919029	2920799	478	4	86079	87376	19	0	0	0	0	0	0	0	no	#N/A	0
45	Hpan_g10926.t1	Adami_g5626.t1	PHAVENT1A021896P1	Petfic_v00_mik.OX345647.1G34.1	Choren_v00_mik.OX359194.1G828.1	Osclob_v00_mik.OX382154.1G451.1	5	1496360	1498206	518	6	6942836	6944792	982	12	146356	147742	44	10	6873940	6875519	822	13	8807567	8809001	650	4	271647	273153	26	0	0	0	0	0	0	0	no	#N/A	0
46	Hpan_g10933.t1	Adami_g5638.t1	PHAVENT1A015361P1	Petfic_v00_mik.OX345647.1G45.1	Choren_v00_mik.OX359194.1G803.1	Osclob_v00_mik.OX382152.1G186.1	3	588832	597251	205	6	6824084	6836066	955	12	147883	159072	45	10	4999058	5018407	578	13	8859540	8881975	666	4	485279	495663	37	0	0	0	0	0	0	0	no	#N/A	0
47	Hpan_g10959.t1	Adami_g5673.t1	PHAVENT1A004823P1	Petfic_v00_mik.OX345647.1G84.1	Choren_v00_mik.OX359194.1G673.1	Osclob_v00_mik.OX382157.1G846.1	8	3412751	3420149	963	6	5843777	5853980	803	12	515780	523554	102	10	6698641	6705717	798	13	9437310	9449785	703	4	908828	915993	69	f	0	0	0	0	0	0	no	#N/A	0
48	Hpan_g10974.t1	Adami_g5812.t1	PHAVENT1A002545P1	Petfic_v00_mik.OX345647.1G16.1	Choren_v00_mik.OX359194.1G944.1	Osclob_v00_mik.OX382157.1G799.1	8	3203919	3207366	910	6	7549077	7553574	1131	12	82730	85505	22	10	4041894	4049284	495	13	10915387	10921679	875	4	1016323	1019508	83	f	0	0	0	0	0	0	no	#N/A	0
49	Hpan_g10976.t1	Adami_g5814.t1	PHAVENT1A010966P1	Petfic_v00_mik.OX345647.1G17.1	Choren_v00_mik.OX359194.1G946.1	Osclob_v00_mik.OX382157.1G800.1	8	3207435	3208672	911	6	7557987	7559295	1133	12	87066	88337	24	10	4479641	4482696	531	13	10925699	10929299	878	4	1022199	1024292	85	f	0	0	0	0	0	0	no	#N/A	0
50	Hpan_g10983.t1	Adami_g5805.t1	PHAVENT1A003715P1	Petfic_v00_mik.OX345647.1G67.1	Choren_v00_mik.OX359194.1G914.1	Osclob_v00_mik.OX382157.1G543.1	8	2270477	2271415	619	6	7391940	7395536	1088	12	357189	358558	84	10	4568756	4571569	541	13	10873924	10875942	868	4	1073079	1075251	94	f	0	0	0	0	0	0	no	#N/A	0
51	Hpan_g11009.t1	Adami_g5653.t1	PHAVENT1A011858P1	Petfic_v00_mik.OX345647.1G88.1	Choren_v00_mik.OX359194.1G644.1	Osclob_v00_mik.OX382157.1G855.1	8	3432677	3433444	969	6	5685582	5687868	769	12	528496	529157	105	10	6840257	6841739	810	13	9196997	9199890	681	4	1223077	1223669	124	f	0	0	0	0	0	0	no	#N/A	0
53	Hpan_g11084.t1	Adami_g5756.t1	PHAVENT1A017004P1	Petfic_v00_mik.OX345647.1G159.1	Choren_v00_mik.OX359194.1G979.1	Osclob_v00_mik.OX382169.1G10.1	20	137577	139985	10	6	7801143	7801967	1177	12	1290755	1291784	191	10	6061726	6063708	674	13	10481822	10482732	804	4	1862409	1862844	210	f	0	0	0	0	0	0	no	#N/A	0
54	Hpan_g11149.t1	Adami_g5785.t1	PHAVENT1A016049P1	Petfic_v00_mik.OX345639.1G655.1	Choren_v00_mik.OX359194.1G1154.1	Osclob_v00_mik.OX382157.1G410.1	8	1817629	1820809	477	6	8689784	8693648	1389	4	4171061	4177738	770	10	3101241	3110395	439	13	10713956	10719130	837	4	2760777	2765059	285	f	0	0	0	0	0	0	no	#N/A	0
55	Hpan_g11153.t1	Adami_g5788.t1	PHAVENT1A014618P1	Petfic_v00_mik.OX345639.1G656.1	Choren_v00_mik.OX359194.1G1155.1	Osclob_v00_mik.OX382157.1G548.1	8	2309269	2311436	629	6	8694758	8699776	1390	4	4179289	4181806	773	10	2932055	2938691	430	13	10767752	10772585	841	4	2774016	2778143	289	f	0	0	0	0	0	0	no	#N/A	0
56	Hpan_g11195.t1	Adami_g5742.t1	PHAVENT1A019055P1	Petfic_v00_mik.OX345647.1G339.1	Choren_v00_mik.OX359194.1G645.1	Osclob_v00_mik.OX382157.1G740.1	8	2972915	2973585	848	6	5682674	5685428	768	12	3482172	3486452	418	10	6220143	6221075	708	13	10385174	10386116	789	4	3159865	3160330	343	f	0	0	0	0	0	0	no	#N/A	0
57	Hpan_g11196.t1	Adami_g5743.t1	PHAVENT1A014162P1	Petfic_v00_mik.OX345647.1G336.1	Choren_v00_mik.OX359194.1G688.1	Osclob_v00_mik.OX382157.1G515.1	8	2161958	2162344	591	6	5933134	5934108	816	12	3486520	3489608	419	10	6215025	6220142	707	13	10386238	10387422	790	4	3160571	3161820	344	f	0	0	0	0	0	0	no	#N/A	0
58	Hpan_g11215.t1	Adami_g5729.t1	PHAVENT1A018998P1	Petfic_v00_mik.OX345647.1G153.1	Choren_v00_mik.OX359194.1G862.1	Osclob_v00_mik.OX382157.1G598.1	8	2501016	2513740	691	6	7100390	7107980	1023	12	1202432	1223877	180	10	6281198	6305681	723	13	10297839	10310140	775	4	3308213	3324008	364	f	0	0	0	0	0	0	no	#N/A	0
59	Hpan_g11240.t1	Adami_g5712.t1	PHAVENT1A014998P1	Petfic_v00_mik.OX345647.1G130.1	Choren_v00_mik.OX359194.1G885.1	Osclob_v00_mik.OX382157.1G697.1	8	2843717	2846800	800	6	7200299	7202516	1049	12	1028912	1032670	158	10	6385190	6390224	740	13	10084318	10088628	757	4	3435855	3440405	394	f	0	0	0	0	0	0	no	#N/A	0
60	Hpan_g11259.t1	Adami_g5714.t1	PHAVENT1A019246P1	Petfic_v00_mik.OX345647.1G134.1	Choren_v00_mik.OX359194.1G1118.1	Osclob_v00_mik.OX382162.1G606.1	13	2449832	2452601	712	6	8580485	8581928	1355	12	1038623	1041964	160	10	6397750	6399891	742	13	10097131	10100056	759	4	3650539	3653598	414	0	0	0	0	0	0	0	no	#N/A	0
62	Hpan_g11329.t1	Adami_g5699.t1	PHAVENT1A003290P1	Petfic_v00_mik.OX345647.1G268.1	Choren_v00_mik.OX359194.1G760.1	Osclob_v00_mik.OX382157.1G687.1	8	2801904	2805266	787	6	6554280	6555751	903	12	2522386	2529398	329	10	6509120	6512511	762	13	9843932	9848264	743	4	4259174	4261278	494	f	0	0	0	0	0	0	no	#N/A	0
63	Hpan_g11330.t1	Adami_g5698.t1	PHAVENT1A014138P1	Petfic_v00_mik.OX345647.1G267.1	Choren_v00_mik.OX359194.1G759.1	Osclob_v00_mik.OX382157.1G659.1	8	2697549	2699660	756	6	6550090	6554021	902	12	2529618	2544334	330	10	6512810	6518173	763	13	9838067	9843671	742	4	4261538	4266489	495	f	0	0	0	0	0	0	no	#N/A	0
64	Hpan_g11401.t1	Adami_g5243.t1	PHAVENT1A004379P1	Petfic_v00_mik.OX345647.1G692.1	Choren_v00_mik.OX359194.1G728.1	Osclob_v00_mik.OX382160.1G480.1	11	1528208	1528875	545	6	6322153	6325722	868	12	6018800	6019431	846	10	1035091	1038620	208	13	1409480	1413732	213	4	5024421	5025388	575	0	0	0	0	0	0	0	no	#N/A	0
65	Hpan_g11434.t1	Adami_g5216.t1	PHAVENT1A012653P1	Petfic_v00_mik.OX345647.1G679.1	Choren_v00_mik.OX359201.1G597.1	Osclob_v00_mik.OX382157.1G788.1	8	3182702	3183290	897	13	4599744	4600847	703	12	5957523	5958352	827	10	772852	773830	167	13	901582	903049	182	4	5293150	5293944	616	0	0	0	0	0	0	0	no	#N/A	0
66	Hpan_g11436.t1	Adami_g5213.t1	PHAVENT1A015330P1	Petfic_v00_mik.OX345647.1G672.1	Choren_v00_mik.OX359194.1G731.1	Osclob_v00_mik.OX382157.1G781.1	8	3161358	3163363	893	6	6315547	6322066	867	12	5941553	5944870	825	10	726929	731983	161	13	868816	875237	179	4	5296627	5300645	618	f	0	0	0	0	0	0	no	#N/A	0
67	Hpan_g11475.t1	Adami_g5234.t1	PHAVENT1A022723P1	Petfic_v00_mik.OX345647.1G635.1	Choren_v00_mik.OX359194.1G597.1	Osclob_v00_mik.OX382157.1G404.1	8	1785956	1791713	471	6	5263096	5286717	711	12	5784475	5797438	782	10	941205	953200	199	13	1088297	1101597	202	4	5760846	5793497	661	f	0	0	0	0	0	0	no	#N/A	0
68	Hpan_g11486.t1	Adami_g5316.t1	PHAVENT1A007099P1	Petfic_v00_mik.OX345647.1G612.1	Choren_v00_mik.OX359194.1G829.1	Osclob_v00_mik.OX382157.1G592.1	8	2487029	2489976	683	6	6947674	6951329	985	12	5638397	5643984	753	10	1943529	1952747	333	13	2535608	2545969	303	4	5887621	5898127	671	f	0	0	0	0	0	0	no	#N/A	0
69	Hpan_g11529.t1	Adami_g5250.t1	PHAVENT1A011888P1	Petfic_v00_mik.OX345647.1G646.1	Choren_v00_mik.OX359194.1G1143.1	Osclob_v00_mik.OX382157.1G801.1	8	3219367	3223667	916	6	8672144	8676236	1382	12	5825237	5831604	792	10	1231635	1251983	244	13	1476831	1488359	220	4	6233053	6247534	722	f	0	0	0	0	0	0	no	#N/A	0
70	Hpan_g11607.t1	Adami_g5115.t1	PHAVENT1A018304P1	Petfic_v00_mik.OX345647.1G581.1	Choren_v00_mik.OX359194.1G1139.1	Osclob_v00_mik.OX382157.1G768.1	8	3110475	3112410	879	6	8638834	8640722	1374	12	5413488	5416756	710	10	91258	95360	32	13	210321	212401	55	4	6823662	6825238	815	f	0	0	0	0	0	0	no	#N/A	0
71	Hpan_g11645.t1	Adami_g5086.t1	PHAVENT1A006798P1	Petfic_v00_mik.OX345647.1G513.1	Choren_v00_mik.OX359194.1G1123.1	Osclob_v00_mik.OX382157.1G492.1	8	2099044	2099416	572	6	8638227	8638649	1373	12	5027568	5028331	633	10	20999	21470	7	13	56141	56611	13	4	7176064	7177118	856	f	0	0	0	0	0	0	no	#N/A	0
72	Hpan_g11650.t1	Adami_g5106.t1	PHAVENT1A013283P1	Petfic_v00_mik.OX345647.1G590.1	Choren_v00_mik.OX359194.1G1064.1	Osclob_v00_mik.OX382160.1G407.1	11	1319955	1320752	468	6	8312948	8313945	1287	12	5470912	5471730	721	10	113574	114320	39	13	175837	176572	44	4	7189078	7189910	861	0	0	0	0	0	0	0	no	#N/A	0
73	Hpan_g11654.t1	Adami_g5089.t1	PHAVENT1A004772P1	Petfic_v00_mik.OX345648.1G799.1	Choren_v00_mik.OX359194.1G1138.1	Osclob_v00_mik.OX382157.1G581.1	8	2402810	2403214	670	6	8637771	8638190	1372	13	5826975	5827381	907	10	21657	22166	8	13	70290	72119	16	4	7216592	7217245	866	f	0	0	0	0	0	0	no	#N/A	0
74	Hpan_g11655.t1	Adami_g5080.t1	PHAVENT1A021541P1	Petfic_v00_mik.OX345647.1G515.1	Choren_v00_mik.OX359194.1G895.1	Osclob_v00_mik.OX382157.1G509.1	8	2104974	2112594	575	6	7269680	7282184	1066	12	5007919	5024342	631	10	11853	19116	4	13	31161	41221	5	4	7217514	7231038	867	f	0	0	0	0	0	0	no	#N/A	0
75	Hpan_g11659.t1	Adami_g5083.t1	PHAVENT1A016125P1	Petfic_v00_mik.OX345647.1G571.1	Choren_v00_mik.OX359194.1G874.1	Osclob_v00_mik.OX382157.1G613.1	8	2563914	2565536	713	6	7194132	7195369	1046	12	5328452	5329511	691	10	2320	4062	1	13	47306	49727	8	4	7299099	7300405	871	f	0	0	0	0	0	0	no	#N/A	0
76	Hpan_g11663.t1	Adami_g5129.t1	PHAVENT1A020929P1	Petfic_v00_mik.OX345647.1G358.1	Choren_v00_mik.OX359194.1G856.1	Osclob_v00_mik.OX382157.1G446.1	8	1933797	1935416	519	6	7076624	7084309	1017	12	3765076	3769405	445	10	307744	311348	86	13	278119	280183	73	4	7308257	7310086	875	f	0	0	0	0	0	0	no	#N/A	0
77	Hpan_g11682.t1	Adami_g5141.t1	PHAVENT1A007106P1	Petfic_v00_mik.OX345647.1G428.1	Choren_v00_mik.OX359194.1G931.1	Osclob_v00_mik.OX382157.1G372.1	8	1652231	1655818	435	6	7476763	7483080	1109	12	4329620	4341791	524	10	266245	275842	79	13	410720	417237	89	4	7416252	7423794	898	f	0	0	0	0	0	0	no	#N/A	0
78	Hpan_g11691.t1	Adami_g5357.t1	PHAVENT1A008161P1	Petfic_v00_mik.OX345647.1G592.1	Choren_v00_mik.OX359194.1G1056.1	Osclob_v00_mik.OX382157.1G643.1	8	2640807	2644932	739	6	8279352	8285434	1273	12	5496237	5505907	726	10	2478402	2485315	384	13	3027936	3039593	351	4	7470702	7475110	907	f	0	0	0	0	0	0	no	#N/A	0
79	Hpan_g11693.t1	Adami_g5359.t1	PHAVENT1A003555P1	Petfic_v00_mik.OX345647.1G598.1	Choren_v00_mik.OX359194.1G704.1	Osclob_v00_mik.OX382157.1G796.1	8	3197274	3197777	904	6	6019886	6021200	838	12	5482960	5484400	723	10	2676595	2679380	398	13	3045818	3048630	353	4	7478495	7479511	909	f	0	0	0	0	0	0	no	#N/A	0
81	Hpan_g11702.t1	Adami_g5190.t1	PHAVENT1A021838P1	Petfic_v00_mik.OX345647.1G704.1	Choren_v00_mik.OX359194.1G1063.1	Osclob_v00_mik.OX382154.1G577.1	5	1894866	1896285	663	6	8308009	8310193	1285	12	6072851	6074357	868	10	569347	572390	130	13	718596	720633	150	4	7515462	7517767	918	0	0	0	0	0	0	0	no	#N/A	0
82	Hpan_g11703.t1	Adami_g5189.t1	PHAVENT1A021821P1	Petfic_v00_mik.OX345647.1G713.1	Choren_v00_mik.OX359194.1G852.1	Osclob_v00_mik.OX382154.1G572.1	5	1896322	1897092	664	6	7049658	7050237	1009	12	6072282	6072797	867	10	566653	569306	129	13	716477	718429	149	4	7517868	7518626	919	0	0	0	0	0	0	0	no	#N/A	0
83	Hpan_g11704.t1	Adami_g5187.t1	PHAVENT1A018649P1	Petfic_v00_mik.OX345647.1G712.1	Choren_v00_mik.OX359194.1G1084.1	Osclob_v00_mik.OX382157.1G719.1	8	2895694	2896359	822	6	8437596	8438480	1321	12	6069270	6069963	865	10	559978	561701	127	13	706206	707397	147	4	7519226	7520030	920	f	0	0	0	0	0	0	no	#N/A	0
84	Hpan_g11706.t1	Adami_g5186.t1	PHAVENT1A002015P1	Petfic_v00_mik.OX345636.1G2354.1	Choren_v00_mik.OX359194.1G1091.1	Osclob_v00_mik.OX382157.1G454.1	8	1964855	1965467	537	6	8414775	8415969	1317	1	21774324	21775679	2651	10	553001	559228	126	13	698573	705517	146	4	7525309	7529979	922	f	0	0	0	0	0	0	no	#N/A	0
85	Hpan_g11726.t1	Adami_g5146.t1	PHAVENT1A001226P1	Petfic_v00_mik.OX345647.1G412.1	Choren_v00_mik.OX359194.1G892.1	Osclob_v00_mik.OX382157.1G761.1	8	3097300	3098058	876	6	7217061	7218841	1056	12	4220236	4224862	507	10	225462	227187	70	13	457505	459999	95	4	7628508	7630606	944	f	0	0	0	0	0	0	no	#N/A	0
86	Hpan_g11747.t1	Adami_g5360.t1	PHAVENT1A010027P1	Petfic_v00_mik.OX345647.1G577.1	Choren_v00_mik.OX359194.1G1057.1	Osclob_v00_mik.OX382157.1G790.1	8	3191295	3197014	903	6	8285679	8290090	1274	12	5417835	5422815	711	10	2667209	2676510	397	13	3048791	3060450	354	4	7715620	7719064	968	f	0	0	0	0	0	0	no	#N/A	0
87	Hpan_g11750.t1	Adami_g14913.t1	PHAVENT1A004442P1	Petfic_v00_mik.OX345636.1G5406.1	Choren_v00_mik.OX359197.1G5.1	Osclob_v00_mik.OX382164.1G14.1	15	43625	46269	17	9	28850	33135	13	1	45918648	45946727	6029	18	406731	412130	103	7	467906	476173	110	5	19096	22730	3	j	0	0	0	0	0	0	no	#N/A	0
88	Hpan_g11771.t1	Adami_g14882.t1	PHAVENT1A011862P1	Petfic_v00_mik.OX345636.1G5351.1	Choren_v00_mik.OX359197.1G10.1	Osclob_v00_mik.OX382164.1G205.1	15	720050	720569	225	9	14421	14958	7	1	45480486	45486972	5966	18	722188	723686	158	7	260798	261739	68	5	72063	72529	27	j	0	0	0	0	0	0	no	#N/A	0
90	Hpan_g11791.t1	Adami_g14850.t1	PHAVENT1A009925P1	Petfic_v00_mik.OX345636.1G6143.1	Choren_v00_mik.OX359197.1G50.1	Osclob_v00_mik.OX382164.1G116.1	15	377615	378933	125	9	225196	227735	52	1	52960274	52972345	6845	18	220980	222623	56	7	95580	96934	31	5	145086	146296	49	j	0	0	0	0	0	0	no	#N/A	0
92	Hpan_g11827.t1	Adami_g14845.t1	PHAVENT1A013494P1	Petfic_v00_mik.OX345636.1G6136.1	Choren_v00_mik.OX359199.1G907.1	Osclob_v00_mik.OX382164.1G10.1	15	16748	17237	7	11	6361500	6362171	1085	1	52917100	52919971	6841	18	237465	239943	62	7	81939	82834	26	5	321238	321755	96	0	0	0	0	0	0	0	no	#N/A	0
93	Hpan_g11844.t1	Adami_g14907.t1	PHAVENT1A020908P1	Petfic_v00_mik.OX345636.1G5627.1	Choren_v00_mik.OX359197.1G385.1	Osclob_v00_mik.OX382164.1G168.1	15	610072	610814	187	9	2297042	2298908	465	1	47816395	47874675	6279	18	750767	764597	165	7	415014	424989	104	5	425126	429393	115	j	0	0	0	0	0	0	no	#N/A	0
94	Hpan_g11851.t1	Adami_g14841.t1	PHAVENT1A023150P1	Petfic_v00_mik.OX345636.1G6131.1	Choren_v00_mik.OX359197.1G48.1	Osclob_v00_mik.OX382164.1G21.1	15	93807	94384	34	9	217278	222504	50	1	52867886	52877591	6833	18	264401	270792	69	7	60581	63197	21	5	478526	481990	122	j	0	0	0	0	0	0	no	#N/A	0
97	Hpan_g11966.t1	Adami_g14941.t1	PHAVENT1A015000P1	Petfic_v00_mik.OX345636.1G5575.1	Choren_v00_mik.OX359197.1G109.1	Osclob_v00_mik.OX382164.1G171.1	15	604415	610030	186	9	526705	531536	125	1	47350659	47369777	6221	18	1185074	1190912	202	7	798071	804484	142	5	1776712	1781023	255	j	0	0	0	0	0	0	no	#N/A	0
99	Hpan_g11973.t1	Adami_g15125.t1	PHAVENT1A005362P1	Petfic_v00_mik.OX345636.1G2217.1	Choren_v00_mik.OX359197.1G601.1	Osclob_v00_mik.OX382164.1G190.1	15	672903	679470	212	9	4732914	4741563	700	1	20082685	20092012	2497	18	5682896	5693900	585	7	3777663	3778621	401	5	1899466	1923667	263	j	0	0	0	0	0	0	no	#N/A	0
100	Hpan_g12074.t1	Adami_g14998.t1	PHAVENT1A013449P1	Petfic_v00_mik.OX345636.1G4959.1	Choren_v00_mik.OX359197.1G271.1	Osclob_v00_mik.OX382164.1G281.1	15	1156929	1157610	316	9	1481034	1486303	321	1	41741416	41749041	5537	18	1832145	1835477	280	7	1503958	1506065	218	5	3217730	3218564	394	j	0	0	0	0	0	0	no	#N/A	0
101	Hpan_g12076.t1	Adami_g15000.t1	PHAVENT1A017086P2	Petfic_v00_mik.OX345636.1G4932.1	Choren_v00_mik.OX359197.1G73.1	Osclob_v00_mik.OX382164.1G31.1	15	72776	75334	23	9	342901	346741	84	1	41508827	41525719	5508	18	1760848	1769630	273	7	1525943	1530904	222	5	3227234	3232097	397	j	0	0	0	0	0	0	no	#N/A	0
103	Hpan_g12190.t1	Adami_g15217.t1	PHAVENT1A003680P1	Petfic_v00_mik.OX345636.1G5132.1	Choren_v00_mik.OX359189.1G1595.1	Osclob_v00_mik.OX382151.1G256.1	2	853242	854333	282	1	9845101	9848066	1948	1	43489311	43506238	5732	18	2709139	2716565	349	7	5576429	5614495	512	5	4544102	4547592	531	0	0	0	0	0	0	0	no	#N/A	0
107	Hpan_g12320.t1	Adami_g15056.t1	PHAVENT1A019105P1	Petfic_v00_mik.OX345636.1G4217.1	Choren_v00_mik.OX359197.1G200.1	Osclob_v00_mik.OX382161.1G30.1	12	110268	112238	28	9	1018430	1025351	240	1	34557480	34571906	4690	18	6591800	6594397	679	7	2302048	2307108	320	5	6866322	6868957	683	0	0	0	0	0	0	0	no	#N/A	0
108	Hpan_g12325.t1	Adami_g15062.t1	PHAVENT1A003000P1	Petfic_v00_mik.OX345636.1G4303.1	Choren_v00_mik.OX359197.1G86.1	Osclob_v00_mik.OX382164.1G218.1	15	785604	787897	241	9	403349	409429	98	1	35292286	35305906	4789	18	6581961	6585066	674	7	2321120	2327263	327	5	6873648	6876756	688	j	0	0	0	0	0	0	no	#N/A	0
110	Hpan_g12336.t1	Adami_g15069.t1	PHAVENT1A016196P1	Petfic_v00_mik.OX345636.1G4268.1	Choren_v00_mik.OX359197.1G107.1	Osclob_v00_mik.OX382157.1G772.1	8	3115510	3116787	882	9	524965	526251	124	1	34902210	34903278	4745	18	6559176	6562987	667	7	2355520	2358039	335	5	6916493	6917715	699	0	0	0	0	0	0	0	no	#N/A	0
111	Hpan_g12354.t1	Adami_g15101.t1	PHAVENT1A004759P1	Petfic_v00_mik.OX345636.1G4210.1	Choren_v00_mik.OX359201.1G804.1	Osclob_v00_mik.OX382161.1G19.1	12	112632	113766	29	13	5926781	5929348	958	1	34468315	34479955	4679	18	5844760	5849369	600	7	3400660	3404032	372	5	7146158	7148411	718	0	0	0	0	0	0	0	no	#N/A	0
129	Hpan_g13092.t1	Adami_g1001.t1	PHAVENT1A009389P1	Petfic_v00_mik.OX345645.1G37.1	Choren_v00_mik.OX359192.1G741.1	Osclob_v00_mik.OX382159.1G310.1	10	1064357	1066057	351	4	5711893	5717627	884	10	147789	150504	41	22	4526490	4538642	619	1	9571427	9587258	1074	7	20813	22368	5	d	0	0	0	0	0	0	no	#N/A	0
131	Hpan_g13100.t1	Adami_g981.t1	PHAVENT1A006156P1	Petfic_v00_mik.OX345645.1G32.1	Choren_v00_mik.OX359192.1G676.1	Osclob_v00_mik.OX382159.1G10.1	10	82106	83134	15	4	5396629	5398728	807	10	112386	113589	29	22	4339339	4347029	587	1	9290130	9294591	1050	7	42799	44071	16	d	0	0	0	0	0	0	no	#N/A	0
132	Hpan_g13127.t1	Adami_g780.t1	PHAVENT1A006146P1	Petfic_v00_mik.OX345645.1G186.1	Choren_v00_mik.OX359192.1G125.1	Osclob_v00_mik.OX382159.1G253.1	10	889798	892898	288	4	673809	678393	154	10	1015108	1022441	213	22	5263588	5267871	798	1	6864896	6870719	788	7	149402	152743	47	d	0	0	0	0	0	0	no	#N/A	0
133	Hpan_g13137.t1	Adami_g1227.t1	PHAVENT1A010609P1	Petfic_v00_mik.OX345645.1G56.1	Choren_v00_mik.OX359192.1G78.1	Osclob_v00_mik.OX382159.1G383.1	10	1369540	1370853	429	4	377295	380198	94	10	230920	232719	74	22	3176511	3185835	386	1	13800666	13826143	1323	7	182265	184072	60	d	0	0	0	0	0	0	no	#N/A	0
134	Hpan_g13138.t1	Adami_g1228.t1	PHAVENT1A005581P1	Petfic_v00_mik.OX345645.1G67.1	Choren_v00_mik.OX359192.1G77.1	Osclob_v00_mik.OX382159.1G379.1	10	1370908	1371509	430	4	380232	381195	95	10	230087	230795	73	22	3185132	3186735	387	1	13826346	13836696	1324	7	184238	184906	61	d	0	0	0	0	0	0	no	#N/A	0
135	Hpan_g13142.t1	Adami_g760.t1	PHAVENT1A005037P1	Petfic_v00_mik.OX345645.1G41.1	Choren_v00_mik.OX359192.1G729.1	Osclob_v00_mik.OX382159.1G449.1	10	1688645	1690308	507	4	5662117	5664047	871	10	158976	164104	47	22	5152932	5158372	769	1	6749556	6754114	764	7	190447	194546	66	d	0	0	0	0	0	0	no	#N/A	0
136	Hpan_g13146.t1	Adami_g766.t1	PHAVENT1A007311P1	Petfic_v00_mik.OX345645.1G306.1	Choren_v00_mik.OX359192.1G730.1	Osclob_v00_mik.OX382159.1G266.1	10	919881	921060	297	4	5665550	5667116	873	10	1741358	1744803	366	22	5189071	5191523	777	1	6778661	6781781	771	7	201590	203392	70	d	0	0	0	0	0	0	no	#N/A	0
137	Hpan_g1315.t1	Adami_g3426.t1	PHAVENT1A001906P1	Petfic_v00_mik.OX345642.1G307.1	Choren_v00_mik.OX359200.1G247.1	Osclob_v00_mik.OX382152.1G594.1	3	2186271	2186988	682	12	1159301	1160191	293	7	1762933	1763646	355	21	1479005	1480340	310	11	5205169	5206133	789	10	30147	30967	10	b	0	0	0	0	0	0	no	#N/A	0
138	Hpan_g13154.t1	Adami_g700.t1	PHAVENT1A018342P1	Petfic_v00_mik.OX345645.1G91.1	Choren_v00_mik.OX359192.1G364.1	Osclob_v00_mik.OX382159.1G106.1	10	370182	372398	125	4	2358648	2363373	456	10	356922	361226	108	22	5420857	5423942	835	1	6352548	6357978	687	7	244497	247789	79	d	0	0	0	0	0	0	no	#N/A	0
139	Hpan_g13156.t1	Adami_g696.t1	PHAVENT1A005918P1	Petfic_v00_mik.OX345645.1G304.1	Choren_v00_mik.OX359192.1G11.1	Osclob_v00_mik.OX382159.1G513.1	10	1899213	1907640	584	4	67623	75024	18	10	1709349	1732331	364	22	5410228	5416073	833	1	6322048	6328355	683	7	254724	266984	81	d	0	0	0	0	0	0	no	#N/A	0
140	Hpan_g13164.t1	Adami_g688.t1	PHAVENT1A020551P1	Petfic_v00_mik.OX345645.1G340.1	Choren_v00_mik.OX359192.1G736.1	Osclob_v00_mik.OX382159.1G280.1	10	976776	984568	321	4	5684971	5701784	879	10	1930886	1963606	401	22	5538726	5545128	882	1	6258585	6271276	674	7	307626	319296	89	d	0	0	0	0	0	0	no	#N/A	0
141	Hpan_g13165.t1	Adami_g765.t1	PHAVENT1A022744P1	Petfic_v00_mik.OX345645.1G305.1	Choren_v00_mik.OX359192.1G727.1	Osclob_v00_mik.OX382159.1G424.1	10	1465607	1467880	471	4	5649862	5653974	868	10	1732504	1741069	365	22	5185531	5188795	776	1	6769544	6778270	770	7	319544	322373	90	d	0	0	0	0	0	0	no	#N/A	0
142	Hpan_g13172.t1	Adami_g874.t1	PHAVENT1A011272P1	Petfic_v00_mik.OX345645.1G556.1	Choren_v00_mik.OX359192.1G700.1	Osclob_v00_mik.OX382159.1G334.1	10	1130104	1131259	381	4	5557558	5558980	842	10	4014002	4020332	675	22	3679950	3685120	459	1	7748777	7756472	907	7	349466	353289	98	d	0	0	0	0	0	0	no	#N/A	0
144	Hpan_g13174.t1	Adami_g872.t1	PHAVENT1A017723P1	Petfic_v00_mik.OX345645.1G555.1	Choren_v00_mik.OX359192.1G699.1	Osclob_v00_mik.OX382159.1G140.1	10	461969	462731	159	4	5552053	5555250	840	10	4007528	4011259	673	22	3673072	3677066	457	1	7742062	7745644	905	7	355910	357212	100	d	0	0	0	0	0	0	no	#N/A	0
145	Hpan_g1318.t1	Adami_g3431.t1	PHAVENT1A017147P1	Petfic_v00_mik.OX345642.1G309.1	Choren_v00_mik.OX359200.1G246.1	Osclob_v00_mik.OX382152.1G587.1	3	2197618	2198666	687	12	1140278	1142766	288	7	1778799	1781191	358	21	1450836	1464816	305	11	5240341	5248647	795	10	40838	42454	13	b	0	0	0	0	0	0	no	#N/A	0
146	Hpan_g13191.t1	Adami_g784.t1	PHAVENT1A008815P1	Petfic_v00_mik.OX345645.1G178.1	Choren_v00_mik.OX359192.1G26.1	Osclob_v00_mik.OX382159.1G15.1	10	100408	100919	23	4	133374	134106	35	10	958806	960452	199	22	5298900	5299753	804	1	6914323	6915986	794	7	432173	432707	118	d	0	0	0	0	0	0	no	#N/A	0
147	Hpan_g13203.t1	Adami_g717.t1	PHAVENT1A003195P1	Petfic_v00_mik.OX345645.1G122.1	Choren_v00_mik.OX359192.1G772.1	Osclob_v00_mik.OX382159.1G189.1	10	680376	681007	224	4	5806591	5807654	912	10	533558	534745	137	22	5492035	5493098	862	1	6454657	6456796	707	7	489689	490585	133	d	0	0	0	0	0	0	no	#N/A	0
148	Hpan_g1322.t1	Adami_g3450.t1	PHAVENT1A001526P1	Petfic_v00_mik.OX345642.1G61.1	Choren_v00_mik.OX359200.1G82.1	Osclob_v00_mik.OX382152.1G1080.1	3	3836282	3839137	1258	12	280534	283843	90	7	242344	245756	79	21	1354772	1360891	293	11	5453121	5473049	816	10	58913	65043	18	b	0	0	0	0	0	0	no	#N/A	0
149	Hpan_g13220.t1	Adami_g11652.t1	PHAVENT1A009472P1	Petfic_v00_mik.OX345639.1G80.1	Choren_v00_mik.OX359201.1G71.1	Osclob_v00_mik.OX382153.1G531.1	4	1922197	1924632	599	13	350935	354315	83	4	355885	359473	88	24	336604	341252	73	4	20320544	20324883	2006	7	556946	560230	152	a	0	0	0	0	0	0	no	#N/A	0
151	Hpan_g13247.t1	Adami_g725.t1	PHAVENT1A004296P1	Petfic_v00_mik.OX345645.1G140.1	Choren_v00_mik.OX359192.1G30.1	Osclob_v00_mik.OX382159.1G320.1	10	1088437	1090471	365	4	138126	142065	37	10	647160	652165	161	22	5205032	5209094	782	1	6515135	6518975	718	7	658426	660844	185	d	0	0	0	0	0	0	no	#N/A	0
152	Hpan_g13256.t1	Adami_g1100.t1	PHAVENT1A005701P1	Petfic_v00_mik.OX345645.1G72.1	Choren_v00_mik.OX359192.1G447.1	Osclob_v00_mik.OX382168.1G386.1	19	1745618	1747665	459	4	2830558	2835802	553	10	284635	287349	83	22	3027787	3037673	361	1	10981320	11022322	1185	7	695172	697665	194	0	0	0	0	0	0	0	no	#N/A	0
153	Hpan_g13264.t1	Adami_g842.t1	PHAVENT1A002284P1	Petfic_v00_mik.OX345645.1G93.1	Choren_v00_mik.OX359192.1G383.1	Osclob_v00_mik.OX382159.1G415.1	10	1482412	1486570	478	4	2492655	2496709	480	10	368772	373245	112	22	3233383	3246536	393	1	7362130	7367276	861	7	726652	730147	204	d	0	0	0	0	0	0	no	#N/A	0
154	Hpan_g13279.t1	Adami_g709.t1	PHAVENT1A016258P1	Petfic_v00_mik.OX345645.1G112.1	Choren_v00_mik.OX359192.1G99.1	Osclob_v00_mik.OX382159.1G286.1	10	970076	971722	316	4	553184	554183	126	10	469485	472851	129	22	5453851	5455863	848	1	6394107	6397295	697	7	836221	838502	222	d	0	0	0	0	0	0	no	#N/A	0
156	Hpan_g13302.t1	Adami_g1187.t1	PHAVENT1A004146P1	Petfic_v00_mik.OX345645.1G215.1	Choren_v00_mik.OX359192.1G143.1	Osclob_v00_mik.OX382159.1G470.1	10	1779533	1786400	537	4	759648	774614	173	10	1181450	1198094	253	22	2755922	2782617	332	1	13019256	13073957	1282	7	949217	961316	249	d	0	0	0	0	0	0	no	#N/A	0
157	Hpan_g13303.t1	Adami_g982.t1	PHAVENT1A001179P1	Petfic_v00_mik.OX345645.1G13.1	Choren_v00_mik.OX359192.1G677.1	Osclob_v00_mik.OX382159.1G12.1	10	80053	82020	14	4	5390990	5396610	806	10	113663	115639	30	22	4334888	4339486	586	1	9294788	9305061	1051	7	961648	964276	250	d	0	0	0	0	0	0	no	#N/A	0
158	Hpan_g13331.t1	Adami_g994.t1	PHAVENT1A019821P1	Petfic_v00_mik.OX345645.1G46.1	Choren_v00_mik.OX359192.1G172.1	Osclob_v00_mik.OX382159.1G16.1	10	103891	108842	25	4	996983	1004358	209	10	174941	179734	51	22	4431727	4441553	603	1	9500278	9540172	1065	7	1087988	1099172	282	d	0	0	0	0	0	0	no	#N/A	0
159	Hpan_g13336.t1	Adami_g1259.t1	PHAVENT1A022621P1	Petfic_v00_mik.OX345645.1G408.1	Choren_v00_mik.OX359192.1G83.1	Osclob_v00_mik.OX382159.1G394.1	10	1427034	1427934	456	4	396787	398403	100	10	2591414	2594373	488	22	4680944	4683426	661	1	14255347	14259249	1357	7	1116984	1118419	287	d	0	0	0	0	0	0	no	#N/A	0
160	Hpan_g13339.t1	Adami_g1057.t1	PHAVENT1A021820P1	Petfic_v00_mik.OX345645.1G413.1	Choren_v00_mik.OX359192.1G290.1	Osclob_v00_mik.OX382159.1G114.1	10	380121	384461	129	4	1804804	1807535	361	10	2630565	2632928	495	22	4651669	4654559	654	1	10274118	10283257	1139	7	1125180	1127178	290	d	0	0	0	0	0	0	no	#N/A	0
161	Hpan_g1335.t1	Adami_g11273.t1	PHAVENT1A012337P1	Petfic_v00_mik.OX345639.1G491.1	Choren_v00_mik.OX359201.1G105.1	Osclob_v00_mik.OX382151.1G241.1	2	806776	812277	271	13	521630	524060	125	4	3453648	3456123	580	24	4766788	4769054	666	4	15873892	15876825	1525	10	135698	138312	35	0	0	0	0	0	0	0	no	#N/A	0
162	Hpan_g1336.t1	Adami_g11272.t1	PHAVENT1A020086P1	Petfic_v00_mik.OX345639.1G492.1	Choren_v00_mik.OX359201.1G19.1	Osclob_v00_mik.OX382153.1G215.1	4	742356	743056	235	13	82048	82798	20	4	3460213	3461089	582	24	4769285	4770980	667	4	15870809	15873718	1524	10	138469	139162	36	a	0	0	0	0	0	0	no	#N/A	0
163	Hpan_g13397.t1	Adami_g809.t1	PHAVENT1A006778P1	Petfic_v00_mik.OX345645.1G331.1	Choren_v00_mik.OX359192.1G721.1	Osclob_v00_mik.OX382159.1G218.1	10	747691	751661	251	4	5628386	5634040	862	10	1864514	1875121	392	22	5076615	5084120	757	1	7101235	7108173	824	7	1378571	1385388	360	d	0	0	0	0	0	0	no	#N/A	0
164	Hpan_g13405.t1	Adami_g1115.t1	PHAVENT1A017099P1	Petfic_v00_mik.OX345645.1G233.1	Choren_v00_mik.OX359192.1G495.1	Osclob_v00_mik.OX382159.1G75.1	10	294194	295716	95	4	3063979	3066078	607	10	1275670	1277344	270	22	2989293	2993821	355	1	11338441	11342133	1203	7	1423167	1425037	371	d	0	0	0	0	0	0	no	#N/A	0
165	Hpan_g1341.t1	Adami_g11271.t1	PHAVENT1A001506P2	Petfic_v00_mik.OX345639.1G462.1	Choren_v00_mik.OX359201.1G37.1	Osclob_v00_mik.OX382153.1G860.1	4	3070050	3073152	979	13	172770	176415	43	4	3282679	3291582	553	24	4777219	4783224	669	4	15864675	15870627	1523	10	157679	161433	43	a	0	0	0	0	0	0	no	#N/A	0
166	Hpan_g13424.t1	Adami_g901.t1	PHAVENT1A009518P1	Petfic_v00_mik.OX345645.1G318.1	Choren_v00_mik.OX359192.1G618.1	Osclob_v00_mik.OX382159.1G45.1	10	180072	183370	65	4	5055413	5060378	742	10	1792496	1798587	375	22	3867026	3870994	502	1	8047533	8053211	937	7	1494762	1498958	394	d	0	0	0	0	0	0	no	#N/A	0
167	Hpan_g1343.t1	Adami_g11188.t1	PHAVENT1A010526P1	Petfic_v00_mik.OX345639.1G510.1	Choren_v00_mik.OX359201.1G132.1	Osclob_v00_mik.OX382153.1G579.1	4	2142949	2144091	656	13	623951	626342	152	4	3537402	3539164	600	24	4938069	4939535	695	4	15259064	15261367	1419	10	162934	164100	45	a	0	0	0	0	0	0	no	#N/A	0
168	Hpan_g13437.t1	Adami_g908.t1	PHAVENT1A008751P1	Petfic_v00_mik.OX345645.1G324.1	Choren_v00_mik.OX359192.1G371.1	Osclob_v00_mik.OX382159.1G225.1	10	796949	798543	263	4	2422226	2425263	467	10	1826049	1831168	386	22	3906832	3910806	511	1	8216309	8222297	945	7	1556317	1558473	407	d	0	0	0	0	0	0	no	#N/A	0
169	Hpan_g13438.t1	Adami_g909.t1	PHAVENT1A000977P1	Petfic_v00_mik.OX345645.1G326.1	Choren_v00_mik.OX359192.1G374.1	Osclob_v00_mik.OX382159.1G231.1	10	796219	796895	262	4	2418850	2420496	465	10	1824967	1825932	385	22	3903493	3906794	510	1	8222467	8226614	946	7	1558807	1560235	408	d	0	0	0	0	0	0	no	#N/A	0
170	Hpan_g13448.t1	Adami_g1040.t1	PHAVENT1A016273P1	Petfic_v00_mik.OX345645.1G858.1	Choren_v00_mik.OX359192.1G263.1	Osclob_v00_mik.OX382159.1G322.1	10	1102160	1103439	371	4	1657091	1661154	331	10	6514250	6519597	1000	22	4585872	4590571	636	1	10101616	10107701	1121	7	1596340	1598302	423	d	0	0	0	0	0	0	no	#N/A	0
171	Hpan_g1345.t1	Adami_g11190.t1	PHAVENT1A001422P1	Petfic_v00_mik.OX345639.1G346.1	Choren_v00_mik.OX359201.1G133.1	Osclob_v00_mik.OX382153.1G844.1	4	3024278	3026907	962	13	627422	632099	153	4	2018627	2031128	414	24	4927970	4934338	692	4	15265036	15270290	1421	10	170332	173204	47	a	0	0	0	0	0	0	no	#N/A	0
173	Hpan_g13501.t1	Adami_g797.t1	PHAVENT1A014412P1	Petfic_v00_mik.OX345645.1G128.1	Choren_v00_mik.OX359192.1G713.1	Osclob_v00_mik.OX382159.1G142.1	10	467122	468299	162	4	5571741	5573341	847	10	578956	581882	148	22	4920652	4922762	724	1	7001660	7006858	809	7	1751196	1753511	485	d	0	0	0	0	0	0	no	#N/A	0
174	Hpan_g13502.t1	Adami_g796.t1	PHAVENT1A016699P1	Petfic_v00_mik.OX345645.1G130.1	Choren_v00_mik.OX359192.1G704.1	Osclob_v00_mik.OX382159.1G122.1	10	452731	454454	154	4	5573446	5576726	848	10	575934	579131	147	22	4917369	4920609	723	1	6996929	7001329	808	7	1753855	1755464	486	d	0	0	0	0	0	0	no	#N/A	0
175	Hpan_g13505.t1	Adami_g883.t1	PHAVENT1A003177P1	Petfic_v00_mik.OX345645.1G102.1	Choren_v00_mik.OX359192.1G434.1	Osclob_v00_mik.OX382159.1G95.1	10	346398	347374	115	4	2761603	2765888	538	10	335039	340648	99	22	3789146	3795791	481	1	7862716	7880981	917	7	1766526	1770702	492	d	0	0	0	0	0	0	no	#N/A	0
176	Hpan_g13510.t1	Adami_g742.t1	PHAVENT1A007675P1	Petfic_v00_mik.OX345645.1G143.1	Choren_v00_mik.OX359192.1G27.1	Osclob_v00_mik.OX382159.1G68.1	10	268976	270945	84	4	134321	137620	36	10	653329	656600	162	22	4822153	4826626	697	1	6638284	6643597	743	7	1792489	1795711	499	d	0	0	0	0	0	0	no	#N/A	0
177	Hpan_g13514.t1	Adami_g771.t1	PHAVENT1A017336P1	Petfic_v00_mik.OX345645.1G207.1	Choren_v00_mik.OX359192.1G4.1	Osclob_v00_mik.OX382159.1G81.1	10	271567	272378	86	4	12480	16650	5	10	1074349	1077247	228	22	5237604	5239213	787	1	6805117	6808062	779	7	1810329	1812432	504	d	0	0	0	0	0	0	no	#N/A	0
178	Hpan_g1352.t1	Adami_g10854.t1	PHAVENT1A004281P1	Petfic_v00_mik.OX345639.1G383.1	Choren_v00_mik.OX359201.1G796.1	Osclob_v00_mik.OX382153.1G493.1	4	1816363	1817499	562	13	5868653	5870025	940	4	2574552	2577907	454	24	3368406	3372591	436	4	13048663	13053682	1040	10	197622	199016	54	a	0	0	0	0	0	0	no	#N/A	0
179	Hpan_g13527.t1	Adami_g782.t1	PHAVENT1A022508P1	Petfic_v00_mik.OX345645.1G166.1	Choren_v00_mik.OX359192.1G132.1	Osclob_v00_mik.OX382159.1G59.1	10	242295	244108	74	4	708214	718141	160	10	875853	901189	187	22	5275327	5290058	800	1	6881729	6900647	791	7	3095239	3107091	521	d	0	0	0	0	0	0	no	#N/A	0
181	Hpan_g13535.t1	Adami_g841.t1	PHAVENT1A016967P1	Petfic_v00_mik.OX345645.1G483.1	Choren_v00_mik.OX359192.1G375.1	Osclob_v00_mik.OX382159.1G336.1	10	1125523	1126112	377	4	2420752	2422056	466	10	3268575	3273572	572	22	4748933	4750952	679	1	7356864	7361905	860	7	3195043	3196445	529	d	0	0	0	0	0	0	no	#N/A	0
182	Hpan_g13549.t1	Adami_g850.t1	PHAVENT1A001245P1	Petfic_v00_mik.OX345645.1G109.1	Choren_v00_mik.OX359192.1G437.1	Osclob_v00_mik.OX382159.1G92.1	10	335319	338085	111	4	2780728	2784496	541	10	389341	391951	117	22	3460046	3470012	419	1	7534916	7540148	874	7	3314154	3317116	545	d	0	0	0	0	0	0	no	#N/A	0
183	Hpan_g13551.t1	Adami_g848.t1	PHAVENT1A017521P1	Petfic_v00_mik.OX345645.1G110.1	Choren_v00_mik.OX359192.1G435.1	Osclob_v00_mik.OX382159.1G235.1	10	807359	807894	268	4	2766620	2767807	539	10	408876	409555	120	22	3432601	3435563	415	1	7510893	7514673	872	7	3335287	3336982	547	d	0	0	0	0	0	0	no	#N/A	0
184	Hpan_g1357.t1	Adami_g10857.t1	PHAVENT1A014480P1	Petfic_v00_mik.OX345639.1G391.1	Choren_v00_mik.OX359201.1G953.1	Osclob_v00_mik.OX382153.1G975.1	4	3478642	3480480	1123	13	6663662	6666756	1132	4	2608046	2615775	462	24	3353287	3357733	431	4	13061439	13069548	1044	10	209387	211659	59	a	0	0	0	0	0	0	no	#N/A	0
185	Hpan_g13576.t1	Adami_g629.t1	PHAVENT1A005772P1	Petfic_v00_mik.OX345645.1G894.1	Choren_v00_mik.OX359189.1G1131.1	Osclob_v00_mik.OX382150.1G604.1	1	2095019	2095770	717	1	7283203	7285574	1367	10	6798880	6800778	1047	22	2186803	2214844	292	1	5475907	5487389	607	7	3593862	3596704	582	0	0	0	0	0	0	0	no	#N/A	0
186	Hpan_g1363.t1	Adami_g10789.t1	PHAVENT1A013976P1	Petfic_v00_mik.OX345639.1G551.1	Choren_v00_mik.OX359195.1G711.1	Osclob_v00_mik.OX382153.1G572.1	4	2123805	2125109	645	7	5502688	5506525	811	4	3776692	3778716	656	24	3685497	3688163	483	4	12202403	12209265	968	10	239146	240460	66	0	0	0	0	0	0	0	no	#N/A	0
187	Hpan_g1364.t1	Adami_g10786.t1	PHAVENT1A005832P1	Petfic_v00_mik.OX345639.1G552.1	Choren_v00_mik.OX359201.1G926.1	Osclob_v00_mik.OX382153.1G219.1	4	796909	801112	246	13	6529469	6535064	1099	4	3766906	3776610	655	24	3688001	3699623	484	4	12166428	12187107	964	10	240649	246241	67	a	0	0	0	0	0	0	no	#N/A	0
188	Hpan_g13671.t1	Adami_g581.t1	PHAVENT1A011468P1	Petfic_v00_mik.OX345645.1G378.1	Choren_v00_mik.OX359198.1G142.1	Osclob_v00_mik.OX382159.1G478.1	10	1756990	1759518	527	10	813978	819245	168	10	2268042	2284132	455	22	850843	858623	159	1	4902187	4909992	549	7	4761556	4767798	697	0	0	0	0	0	0	0	no	#N/A	0
189	Hpan_g13689.t1	Adami_g13598.t1	PHAVENT1A017307P1	Petfic_v00_mik.OX345645.1G282.1	Choren_v00_mik.OX359192.1G674.1	Osclob_v00_mik.OX382159.1G167.1	10	589063	589461	189	4	5362351	5366884	803	10	1580428	1581059	337	22	748097	749930	147	6	3161377	3163131	516	7	4893873	4894703	720	d	0	0	0	0	0	0	no	#N/A	0
190	Hpan_g13691.t1	Adami_g569.t1	PHAVENT1A018807P1	Petfic_v00_mik.OX345645.1G289.1	Choren_v00_mik.OX359192.1G471.1	Osclob_v00_mik.OX382159.1G170.1	10	599899	602602	197	4	2973277	2982194	579	10	1586770	1605043	340	22	701100	718338	138	1	4726413	4742094	537	7	4897612	4902935	722	d	0	0	0	0	0	0	no	#N/A	0
191	Hpan_g13754.t1	Adami_g508.t1	PHAVENT1A005604P1	Petfic_v00_mik.OX345645.1G533.1	Choren_v00_mik.OX359192.1G378.1	Osclob_v00_mik.OX382159.1G309.1	10	1060351	1063912	350	4	2431315	2436190	470	10	3792172	3796931	640	22	346228	353193	89	1	4074316	4093131	469	7	5564301	5573202	800	d	0	0	0	0	0	0	no	#N/A	0
192	Hpan_g13775.t1	Adami_g495.t1	PHAVENT1A008431P1	Petfic_v00_mik.OX345645.1G364.1	Choren_v00_mik.OX359192.1G356.1	Osclob_v00_mik.OX382159.1G412.1	10	1462214	1463167	469	4	2296173	2297140	445	10	2173797	2176144	434	22	243681	246330	62	1	3922654	3924974	455	7	5747250	5749843	826	d	0	0	0	0	0	0	no	#N/A	0
193	Hpan_g13830.t1	Adami_g8492.t1	PHAVENT1A021636P1	Petfic_v00_mik.OX345649.1G73.1	Choren_v00_mik.OX359191.1G1152.1	Osclob_v00_mik.OX382153.1G441.1	4	1609195	1612182	496	3	8813374	8815092	1364	14	347776	352842	92	13	6214219	6223102	883	3	461807	466843	91	8	34429	38804	14	0	0	0	0	0	0	0	no	#N/A	0
194	Hpan_g13831.t1	Adami_g8443.t1	PHAVENT1A014831P1	Petfic_v00_mik.OX345649.1G600.1	Choren_v00_mik.OX359193.1G852.1	Osclob_v00_mik.OX382154.1G570.1	5	1889948	1890299	659	5	5550191	5552114	957	14	4954322	4956423	746	13	6754837	6756387	1010	3	180225	182713	26	8	38906	39278	15	c	0	0	0	0	0	0	no	#N/A	0
195	Hpan_g13836.t1	Adami_g8438.t1	PHAVENT1A015578P1	Petfic_v00_mik.OX345649.1G601.1	Choren_v00_mik.OX359193.1G810.1	Osclob_v00_mik.OX382154.1G174.1	5	583606	585973	198	5	5231965	5253264	904	14	4845576	4882775	734	13	6729120	6740860	1004	3	160687	170967	21	8	45260	49237	20	c	0	0	0	0	0	0	no	#N/A	0
196	Hpan_g13844.t1	Adami_g8792.t1	PHAVENT1A020947P1	Petfic_v00_mik.OX345649.1G820.1	Choren_v00_mik.OX359193.1G85.1	Osclob_v00_mik.OX382154.1G564.1	5	1839077	1841880	652	5	325327	328500	95	14	5922884	5924012	987	13	4875838	4919867	635	3	2674032	2699881	460	8	78706	83602	29	c	0	0	0	0	0	0	no	#N/A	0
197	Hpan_g13845.t1	Adami_g8715.t1	PHAVENT1A018277P1	Petfic_v00_mik.OX345649.1G720.1	Choren_v00_mik.OX359193.1G896.1	Osclob_v00_mik.OX382154.1G165.1	5	633480	636307	210	5	5788688	5797278	1006	14	5579563	5585488	876	13	5388022	5396004	727	3	2022997	2031417	367	8	83837	88772	30	c	0	0	0	0	0	0	no	#N/A	0
198	Hpan_g13853.t1	Adami_g8707.t1	PHAVENT1A016171P1	Petfic_v00_mik.OX345649.1G465.1	Choren_v00_mik.OX359193.1G37.1	Osclob_v00_mik.OX382154.1G485.1	5	1613215	1613931	561	5	177014	177332	43	14	3782621	3783547	566	13	5460699	5463429	739	3	1953052	1954066	359	8	123108	123608	38	c	0	0	0	0	0	0	no	#N/A	0
199	Hpan_g13859.t1	Adami_g8699.t1	PHAVENT1A023336P1	Petfic_v00_mik.OX345649.1G503.1	Choren_v00_mik.OX359193.1G6.1	Osclob_v00_mik.OX382162.1G114.1	13	339201	342797	124	5	23750	27505	5	14	4058083	4067648	618	13	5489800	5497595	745	3	1905593	1917941	348	8	138715	144858	44	0	0	0	0	0	0	0	no	#N/A	0
200	Hpan_g13871.t1	Adami_g8691.t1	PHAVENT1A013829P1	Petfic_v00_mik.OX345649.1G515.1	Choren_v00_mik.OX359193.1G319.1	Osclob_v00_mik.OX382154.1G81.1	5	294994	300705	87	5	1734500	1751173	377	14	4091400	4108109	624	13	5537773	5557126	751	3	1825682	1846953	336	8	178606	186509	57	c	0	0	0	0	0	0	no	#N/A	0
201	Hpan_g13876.t1	Adami_g8689.t1	PHAVENT1A017530P1	Petfic_v00_mik.OX345649.1G672.1	Choren_v00_mik.OX359193.1G125.1	Osclob_v00_mik.OX382154.1G257.1	5	877245	884078	304	5	477755	487154	141	14	5380246	5390431	830	13	5613646	5624229	762	3	1799226	1809915	334	8	207484	218783	62	c	0	0	0	0	0	0	no	#N/A	0
202	Hpan_g13881.t1	Adami_g8685.t1	PHAVENT1A009202P1	Petfic_v00_mik.OX345649.1G675.1	Choren_v00_mik.OX359193.1G103.1	Osclob_v00_mik.OX382154.1G385.1	5	1308560	1310552	453	5	407225	409149	115	14	5410906	5413304	835	13	5651575	5653984	771	3	1736274	1738334	329	8	237987	240250	67	c	0	0	0	0	0	0	no	#N/A	0
203	Hpan_g13885.t1	Adami_g8800.t1	PHAVENT1A004196P1	Petfic_v00_mik.OX345649.1G826.1	Choren_v00_mik.OX359193.1G182.1	Osclob_v00_mik.OX382154.1G215.1	5	758102	759603	257	5	820292	822105	218	14	5926582	5928845	989	13	4818145	4824364	622	3	2732161	2735282	468	8	256084	258187	72	c	0	0	0	0	0	0	no	#N/A	0
204	Hpan_g13897.t1	Adami_g8601.t1	PHAVENT1A016589P1	Petfic_v00_mik.OX345649.1G382.1	Choren_v00_mik.OX359193.1G307.2	Osclob_v00_mik.OX382154.1G170.1	5	562007	563159	185	5	1630350	1648324	361	14	2994832	3005467	461	13	3764903	3777324	498	3	1086885	1090268	236	8	331965	334501	89	c	0	0	0	0	0	0	no	#N/A	0
205	Hpan_g13906.t1	Adami_g8586.t1	PHAVENT1A011090P1	Petfic_v00_mik.OX345649.1G451.1	Choren_v00_mik.OX359193.1G236.1	Osclob_v00_mik.OX382154.1G256.1	5	874313	876500	303	5	1066123	1067816	278	14	3692574	3694943	551	13	5914823	5916632	822	3	1005874	1008328	219	8	433226	434800	98	c	0	0	0	0	0	0	no	#N/A	0
206	Hpan_g13911.t1	Adami_g8591.t1	PHAVENT1A002713P1	Petfic_v00_mik.OX345649.1G482.1	Choren_v00_mik.OX359193.1G67.1	Osclob_v00_mik.OX382154.1G194.1	5	695271	698326	233	5	233867	237451	67	14	3936021	3946929	598	13	5858670	5867925	815	3	1025141	1033752	226	8	447802	454242	103	c	0	0	0	0	0	0	no	#N/A	0
207	Hpan_g13932.t1	Adami_g8462.t1	PHAVENT1A017523P1	Petfic_v00_mik.OX345649.1G646.1	Choren_v00_mik.OX359193.1G274.1	Osclob_v00_mik.OX382154.1G464.1	5	1527510	1529105	532	5	1367231	1371116	327	14	5196657	5199638	792	13	6416868	6419847	929	3	268021	271097	53	8	538785	541746	128	c	0	0	0	0	0	0	no	#N/A	0
208	Hpan_g13937.t1	Adami_g8633.t1	PHAVENT1A019785P1	Petfic_v00_mik.OX345649.1G836.1	Choren_v00_mik.OX359193.1G977.1	Osclob_v00_mik.OX382156.1G578.1	7	2494143	2495678	669	5	6344231	6350485	1107	14	5963686	5966574	1003	13	4508403	4521398	577	3	1326049	1340021	270	8	559322	564467	134	0	0	0	0	0	0	0	no	#N/A	0
209	Hpan_g13939.t1	Adami_g8519.t1	PHAVENT1A020463P1	Petfic_v00_mik.OX345649.1G535.1	Choren_v00_mik.OX359193.1G973.1	Osclob_v00_mik.OX382154.1G90.1	5	328518	330974	102	5	6317791	6326353	1100	14	4302022	4317678	657	13	6542832	6549210	962	3	606658	615395	124	8	575850	581656	136	c	0	0	0	0	0	0	no	#N/A	0
210	Hpan_g13940.t1	Adami_g8520.t1	PHAVENT1A001508P1	Petfic_v00_mik.OX345649.1G537.1	Choren_v00_mik.OX359193.1G586.1	Osclob_v00_mik.OX382154.1G271.1	5	955880	956758	326	5	4006293	4007560	664	14	4299606	4301922	656	13	6540886	6542801	961	3	615971	617469	125	8	581892	583400	137	c	0	0	0	0	0	0	no	#N/A	0
211	Hpan_g13961.t1	Adami_g8738.t1	PHAVENT1A000124P1	Petfic_v00_mik.OX345649.1G737.1	Choren_v00_mik.OX359193.1G108.1	Osclob_v00_mik.OX382162.1G586.1	13	2362716	2364387	689	5	430568	438680	124	14	5645245	5650347	887	13	5217193	5227476	701	3	2160558	2176209	396	8	634862	640116	160	0	0	0	0	0	0	0	no	#N/A	0
212	Hpan_g13964.t1	Adami_g8745.t1	PHAVENT1A019470P1	Petfic_v00_mik.OX345649.1G736.1	Choren_v00_mik.OX359193.1G31.1	Osclob_v00_mik.OX382154.1G499.1	5	1612300	1613172	560	5	126518	127420	30	14	5623322	5625107	882	13	5182744	5187533	690	3	2260155	2263391	404	8	654516	655925	164	c	0	0	0	0	0	0	no	#N/A	0
213	Hpan_g13965.t1	Adami_g8746.t1	PHAVENT1A010049P1	Petfic_v00_mik.OX345649.1G793.1	Choren_v00_mik.OX359193.1G744.1	Osclob_v00_mik.OX382155.1G232.1	6	777308	777861	276	5	4887562	4888991	837	14	5857093	5857743	953	13	5177980	5183327	689	3	2263563	2264765	405	8	656209	656679	165	c	0	0	0	0	0	0	no	#N/A	0
214	Hpan_g13978.t1	Adami_g8755.t1	PHAVENT1A008089P1	Petfic_v00_mik.OX345649.1G782.1	Choren_v00_mik.OX359193.1G102.1	Osclob_v00_mik.OX382155.1G231.1	6	772718	774467	273	5	389297	392103	110	14	5855609	5856882	952	13	5141718	5144011	683	3	2316996	2320138	415	8	715274	716745	179	c	0	0	0	0	0	0	no	#N/A	0
215	Hpan_g13983.t1	Adami_g8767.t1	PHAVENT1A013616P1	Petfic_v00_mik.OX345649.1G816.1	Choren_v00_mik.OX359193.1G185.1	Osclob_v00_mik.OX382154.1G441.1	5	1434939	1436918	506	5	838406	842618	223	14	5906678	5909291	979	13	5087045	5092967	671	3	2427706	2433149	430	8	725785	729555	184	c	0	0	0	0	0	0	no	#N/A	0
216	Hpan_g13986.t1	Adami_g8769.t1	PHAVENT1A009856P1	Petfic_v00_mik.OX345649.1G817.1	Choren_v00_mik.OX359193.1G336.1	Osclob_v00_mik.OX382154.1G529.1	5	1746085	1746448	614	5	1850756	1851582	392	14	5915237	5915561	981	13	5073716	5075274	666	3	2446173	2446982	432	8	739316	739632	187	c	0	0	0	0	0	0	no	#N/A	0
218	Hpan_g14011.t1	Adami_g8615.t1	PHAVENT1A018151P1	Petfic_v00_mik.OX345649.1G520.1	Choren_v00_mik.OX359193.1G387.1	Osclob_v00_mik.OX382154.1G189.1	5	661553	665366	221	5	2120266	2140514	455	14	4162537	4175995	640	13	4207640	4226300	531	3	1211235	1225439	251	8	964922	974375	214	c	0	0	0	0	0	0	no	#N/A	0
219	Hpan_g14016.t1	Adami_g8616.t1	PHAVENT1A013181P1	Petfic_v00_mik.OX345649.1G514.1	Choren_v00_mik.OX359189.1G188.1	Osclob_v00_mik.OX382150.1G1820.1	1	6084012	6088376	2180	1	890431	892895	219	14	4147425	4151939	638	13	4226489	4231823	532	3	1225820	1230723	252	8	1004200	1006910	221	0	0	0	0	0	0	0	no	#N/A	0
220	Hpan_g14017.t1	Adami_g8618.t1	PHAVENT1A023124P1	Petfic_v00_mik.OX345642.1G611.1	Choren_v00_mik.OX359193.1G24.1	Osclob_v00_mik.OX382157.1G321.1	8	1229888	1236811	370	5	117074	121189	27	7	4630579	4652543	717	13	4346329	4353827	550	3	1241268	1249697	254	8	1007123	1012951	222	0	0	0	0	0	0	0	no	#N/A	0
221	Hpan_g14020.t1	Adami_g8623.t1	PHAVENT1A011953P1	Petfic_v00_mik.OX345649.1G478.1	Choren_v00_mik.OX359193.1G323.1	Osclob_v00_mik.OX382154.1G273.1	5	909370	909906	308	5	1729377	1730310	375	14	3898402	3899171	585	13	4387907	4389772	558	3	1274364	1275828	260	8	1017409	1018032	225	c	0	0	0	0	0	0	no	#N/A	0
222	Hpan_g14033.t1	Adami_g8719.t1	PHAVENT1A005360P1	Petfic_v00_mik.OX345649.1G731.1	Choren_v00_mik.OX359193.1G846.1	Osclob_v00_mik.OX382154.1G455.1	5	1520742	1521561	527	5	5494801	5496640	950	14	5678801	5679825	898	13	5362363	5364149	722	3	2052436	2054858	371	8	1149241	1150544	242	c	0	0	0	0	0	0	no	#N/A	0
223	Hpan_g14042.t1	Adami_g8461.t1	PHAVENT1A010795P1	Petfic_v00_mik.OX345649.1G632.1	Choren_v00_mik.OX359193.1G113.1	Osclob_v00_mik.OX382154.1G458.1	5	1529209	1530156	533	5	444942	446212	131	14	5199732	5201493	793	13	6419877	6421835	930	3	265546	267881	52	8	1171781	1173116	253	c	0	0	0	0	0	0	no	#N/A	0
224	Hpan_g1405.t1	Adami_g11257.t1	PHAVENT1A004691P1	Petfic_v00_mik.OX345639.1G341.1	Choren_v00_mik.OX359201.1G845.1	Osclob_v00_mik.OX382156.1G875.1	7	3351576	3352540	1017	13	6109746	6111047	999	4	2010091	2011131	411	24	5113735	5114799	733	4	15754870	15755932	1503	10	464638	465715	117	0	0	0	0	0	0	0	no	#N/A	0
225	Hpan_g1406.t1	Adami_g11256.t1	PHAVENT1A015384P1	Petfic_v00_mik.OX345639.1G338.1	Choren_v00_mik.OX359201.1G127.1	Osclob_v00_mik.OX382153.1G610.1	4	2257631	2262185	700	13	598267	606048	147	4	1994672	2009890	410	24	5115081	5122788	734	4	15745191	15754375	1502	10	484208	490727	118	a	0	0	0	0	0	0	no	#N/A	0
226	Hpan_g14068.t1	Adami_g8483.t1	PHAVENT1A021022P2	Petfic_v00_mik.OX345649.1G79.1	Choren_v00_mik.OX359193.1G237.1	Osclob_v00_mik.OX382154.1G253.1	5	862340	863968	295	5	1067893	1071731	279	14	384813	387038	104	13	6244737	6247412	892	3	420541	423773	79	8	1255460	1257772	285	c	0	0	0	0	0	0	no	#N/A	0
227	Hpan_g14070.t1	Adami_g8485.t1	PHAVENT1A006727P1	Petfic_v00_mik.OX345649.1G87.1	Choren_v00_mik.OX359193.1G911.1	Osclob_v00_mik.OX382154.1G159.1	5	581785	583421	197	5	5923398	5926208	1026	14	324944	326856	82	13	6238847	6241079	890	3	427989	430577	81	8	1261435	1263334	287	c	0	0	0	0	0	0	no	#N/A	0
228	Hpan_g14080.t1	Adami_g8501.t1	PHAVENT1A007047P1	Petfic_v00_mik.OX345649.1G762.1	Choren_v00_mik.OX359193.1G925.1	Osclob_v00_mik.OX382154.1G472.1	5	1556728	1557332	547	5	6018357	6023127	1048	14	5777935	5778671	923	13	6613483	6614737	975	3	540560	541339	104	8	1329747	1330371	299	c	0	0	0	0	0	0	no	#N/A	0
229	Hpan_g14082.t1	Adami_g8503.t1	PHAVENT1A018331P1	Petfic_v00_mik.OX345649.1G764.1	Choren_v00_mik.OX359193.1G907.1	Osclob_v00_mik.OX382154.1G411.1	5	1371864	1373887	479	5	5911107	5914466	1021	14	5781818	5784260	926	13	6616771	6619334	977	3	543121	545781	106	8	1332139	1334244	301	c	0	0	0	0	0	0	no	#N/A	0
230	Hpan_g14083.t1	Adami_g8458.t1	PHAVENT1A021915P1	Petfic_v00_mik.OX345649.1G772.1	Choren_v00_mik.OX359193.1G845.1	Osclob_v00_mik.OX382156.1G185.1	7	696203	700607	226	5	5499163	5509462	954	14	5788556	5795802	927	13	6619887	6628489	978	3	254249	261610	49	8	1334494	1341502	302	0	0	0	0	0	0	0	no	#N/A	0
231	Hpan_g14090.t1	Adami_g8612.t1	PHAVENT1A007762P1	Petfic_v00_mik.OX345649.1G469.1	Choren_v00_mik.OX359193.1G296.1	Osclob_v00_mik.OX382154.1G358.1	5	1138143	1141966	400	5	1545649	1557515	349	14	3829726	3845650	574	13	4152122	4174213	527	3	1144861	1154442	247	8	1354093	1360098	309	c	0	0	0	0	0	0	no	#N/A	0
233	Hpan_g14098.t1	Adami_g8606.t1	PHAVENT1A015434P1	Petfic_v00_mik.OX345649.1G435.1	Choren_v00_mik.OX359193.1G106.1	Osclob_v00_mik.OX382154.1G151.1	5	554612	555316	181	5	416615	418509	118	14	3578489	3580211	534	13	3830131	3833998	506	3	1109367	1112421	241	8	1406928	1409329	319	c	0	0	0	0	0	0	no	#N/A	0
234	Hpan_g14099.t1	Adami_g8605.t1	PHAVENT1A018196P1	Petfic_v00_mik.OX345649.1G436.1	Choren_v00_mik.OX359193.1G300.1	Osclob_v00_mik.OX382154.1G169.1	5	560420	560896	184	5	1593148	1593938	353	14	3575897	3578413	533	13	3822713	3830040	505	3	1106743	1109291	240	8	1409533	1410086	320	c	0	0	0	0	0	0	no	#N/A	0
235	Hpan_g14112.t1	Adami_g8498.t1	PHAVENT1A003060P1	Petfic_v00_mik.OX345649.1G95.1	Choren_v00_mik.OX359191.1G855.1	Osclob_v00_mik.OX382158.1G6.1	9	6486	10782	4	3	7274485	7279454	1002	14	387334	396889	106	13	6178072	6194829	878	3	507743	512453	100	8	1523831	1528196	335	h	0	0	0	0	0	0	no	#N/A	0
236	Hpan_g14123.t1	Adami_g8671.t1	PHAVENT1A001334P1	Petfic_v00_mik.OX345649.1G708.1	Choren_v00_mik.OX359193.1G196.1	Osclob_v00_mik.OX382154.1G513.1	5	1671939	1672847	590	5	876145	878365	234	14	5481785	5483249	852	13	5760768	5763426	795	3	1613353	1617378	313	8	1564877	1566300	347	c	0	0	0	0	0	0	no	#N/A	0
237	Hpan_g1413.t1	Adami_g11248.t1	PHAVENT1A016510P1	Petfic_v00_mik.OX345638.1G846.1	Choren_v00_mik.OX359201.1G878.1	Osclob_v00_mik.OX382157.1G73.1	8	208736	211061	84	13	6275368	6278634	1035	3	7389543	7395290	984	24	5140938	5147514	742	4	15694746	15700359	1493	10	504973	508084	125	0	0	0	0	0	0	0	no	#N/A	0
239	Hpan_g14132.t1	Adami_g8675.t1	PHAVENT1A016154P1	Petfic_v00_mik.OX345649.1G706.1	Choren_v00_mik.OX359193.1G304.1	Osclob_v00_mik.OX382154.1G205.1	5	708736	709967	239	5	1594017	1596676	354	14	5471347	5472828	848	13	5735057	5738439	786	3	1634756	1637818	317	8	1583055	1584536	356	c	0	0	0	0	0	0	no	#N/A	0
240	Hpan_g1414.t1	Adami_g11246.t1	PHAVENT1A017791P1	Petfic_v00_mik.OX345639.1G438.1	Choren_v00_mik.OX359201.1G882.1	Osclob_v00_mik.OX382151.1G250.1	2	859194	861957	285	13	6295292	6296666	1041	4	3084740	3086573	521	24	5152028	5154047	744	4	15685794	15688760	1491	10	508682	510470	126	0	0	0	0	0	0	0	no	#N/A	0
241	Hpan_g1415.t1	Adami_g11245.t1	PHAVENT1A019103P1	Petfic_v00_mik.OX345639.1G442.1	Choren_v00_mik.OX359201.1G702.1	Osclob_v00_mik.OX382153.1G858.1	4	3058144	3060356	976	13	5244839	5249962	824	4	3086624	3089602	522	24	5154128	5156679	745	4	15682313	15685719	1490	10	510628	514549	127	a	0	0	0	0	0	0	no	#N/A	0
242	Hpan_g14171.t1	Adami_g8506.t1	PHAVENT1A010264P1	Petfic_v00_mik.OX345649.1G643.1	Choren_v00_mik.OX359195.1G810.1	Osclob_v00_mik.OX382154.1G110.1	5	421089	421690	134	7	6174685	6175775	930	14	5143517	5144205	785	13	6449154	6450099	940	3	548442	549346	109	8	1981121	1982146	401	0	0	0	0	0	0	0	no	#N/A	0
243	Hpan_g14172.t1	Adami_g8505.t1	PHAVENT1A020251P1	Petfic_v00_mik.OX345649.1G639.1	Choren_v00_mik.OX359193.1G75.1	Osclob_v00_mik.OX382154.1G112.1	5	431935	435313	137	5	263413	264743	83	14	5130980	5133049	776	13	6445579	6447550	939	3	546685	548322	108	8	1982306	1984884	402	c	0	0	0	0	0	0	no	#N/A	0
244	Hpan_g1421.t1	Adami_g11236.t1	PHAVENT1A003099P1	Petfic_v00_mik.OX345639.1G566.1	Choren_v00_mik.OX359201.1G784.1	Osclob_v00_mik.OX382153.1G596.1	4	2188560	2189893	681	13	5843413	5848108	935	4	3901866	3904011	680	24	5198769	5202309	755	4	15644211	15646885	1480	10	543666	546102	135	a	0	0	0	0	0	0	no	#N/A	0
245	Hpan_g14232.t1	Adami_g8532.t1	PHAVENT1A019760P1	Petfic_v00_mik.OX345649.1G552.1	Choren_v00_mik.OX359193.1G221.1	Osclob_v00_mik.OX382154.1G477.1	5	1564728	1565833	549	5	1006714	1011491	261	14	4417616	4423106	677	13	6103883	6107675	862	3	679255	682324	139	8	2610703	2615323	469	c	0	0	0	0	0	0	no	#N/A	0
246	Hpan_g14236.t1	Adami_g8527.t1	PHAVENT1A009571P1	Petfic_v00_mik.OX345649.1G542.1	Choren_v00_mik.OX359193.1G362.1	Osclob_v00_mik.OX382154.1G272.1	5	960755	962239	329	5	2022123	2026408	430	14	4343576	4346286	663	13	6571550	6574121	970	3	632531	636247	133	8	2637681	2640236	473	c	0	0	0	0	0	0	no	#N/A	0
247	Hpan_g14253.t1	Adami_g8646.t1	PHAVENT1A001359P1	Petfic_v00_mik.OX345649.1G824.1	Choren_v00_mik.OX359193.1G373.1	Osclob_v00_mik.OX382154.1G362.1	5	1163940	1164753	408	5	2068591	2070668	442	14	5946104	5948320	1000	13	4663680	4668498	595	3	1487920	1490617	284	8	2714548	2716777	491	c	0	0	0	0	0	0	no	#N/A	0
248	Hpan_g14254.t1	Adami_g8640.t1	PHAVENT1A004934P1	Petfic_v00_mik.OX345649.1G825.1	Choren_v00_mik.OX359193.1G978.1	Osclob_v00_mik.OX382154.1G488.1	5	1627529	1628477	568	5	6362672	6364601	1110	14	5960004	5963022	1002	13	4613551	4619680	589	3	1406648	1412482	277	8	2717808	2728526	494	c	0	0	0	0	0	0	no	#N/A	0
249	Hpan_g14256.t1	Adami_g8636.t1	PHAVENT1A021708P1	Petfic_v00_mik.OX345649.1G832.1	Choren_v00_mik.OX359193.1G982.1	Osclob_v00_mik.OX382154.1G10.1	5	43425	53474	11	5	6350613	6360418	1108	14	5948481	5959823	1001	13	4544452	4576741	582	3	1372621	1388682	273	8	2728843	2774479	498	c	0	0	0	0	0	0	no	#N/A	0
250	Hpan_g14273.t1	Adami_g8778.t1	PHAVENT1A014573P2	Petfic_v00_mik.OX345649.1G805.1	Choren_v00_mik.OX359193.1G32.1	Osclob_v00_mik.OX382154.1G490.1	5	1631717	1634356	572	5	132018	134821	32	14	5881780	5884401	967	13	5034621	5047700	655	3	2545016	2553537	442	8	2874914	2878940	512	c	0	0	0	0	0	0	no	#N/A	0
251	Hpan_g14275.t1	Adami_g8564.t1	PHAVENT1A007452P1	Petfic_v00_mik.OX345649.1G497.1	Choren_v00_mik.OX359193.1G92.1	Osclob_v00_mik.OX382154.1G871.1	5	3579432	3583675	992	5	384001	387608	109	14	4038416	4047183	615	13	5944034	5949899	828	3	854127	859699	190	8	2880354	2884385	514	c	0	0	0	0	0	0	no	#N/A	0
252	Hpan_g14306.t1	Adami_g8512.t1	PHAVENT1A005996P1	Petfic_v00_mik.OX345649.1G659.1	Choren_v00_mik.OX359193.1G93.1	Osclob_v00_mik.OX382154.1G463.1	5	1524726	1526666	530	5	334523	338617	98	14	5218858	5222392	798	13	6486784	6491189	949	3	581901	585254	116	8	3113985	3117550	549	c	0	0	0	0	0	0	no	#N/A	0
253	Hpan_g14308.t1	Adami_g8510.t1	PHAVENT1A016059P1	Petfic_v00_mik.OX345649.1G650.1	Choren_v00_mik.OX359193.1G83.1	Osclob_v00_mik.OX382154.1G456.1	5	1523061	1524547	529	5	331695	333843	97	14	5213434	5216543	796	13	6481418	6483825	946	3	576850	579281	113	8	3120482	3121995	552	c	0	0	0	0	0	0	no	#N/A	0
254	Hpan_g14309.t1	Adami_g8509.t1	PHAVENT1A007241P1	Petfic_v00_mik.OX345649.1G647.1	Choren_v00_mik.OX359193.1G104.1	Osclob_v00_mik.OX382154.1G881.1	5	3572917	3573678	988	5	421436	423769	121	14	5210017	5213069	795	13	6477962	6481046	945	3	574669	576593	112	8	3122511	3124354	553	c	0	0	0	0	0	0	no	#N/A	0
255	Hpan_g1434.t1	Adami_g10964.t1	PHAVENT1A010747P1	Petfic_v00_mik.OX345639.1G649.1	Choren_v00_mik.OX359201.1G620.1	Osclob_v00_mik.OX382153.1G693.1	4	2542386	2545567	786	13	4709241	4721727	727	4	4137716	4141247	761	24	4446281	4453640	610	4	14604208	14617927	1168	10	787724	793210	149	a	0	0	0	0	0	0	no	#N/A	0
256	Hpan_g14368.t1	Adami_g8834.t1	PHAVENT1A018085P1	Petfic_v00_mik.OX345649.1G505.1	Choren_v00_mik.OX359200.1G1101.1	Osclob_v00_mik.OX382154.1G461.1	5	1518434	1520659	526	12	7509872	7511928	1287	14	4080249	4090086	623	13	2451315	2494516	394	3	3178498	3197949	507	8	3519559	3539953	617	0	0	0	0	0	0	0	no	#N/A	0
257	Hpan_g1437.t1	Adami_g10967.t1	PHAVENT1A002346P1	Petfic_v00_mik.OX345639.1G633.1	Choren_v00_mik.OX359201.1G617.1	Osclob_v00_mik.OX382153.1G199.1	4	739937	740771	230	13	4706971	4707954	726	4	4143087	4143693	763	24	4458833	4460485	613	4	14624304	14625430	1171	10	797291	798623	152	a	0	0	0	0	0	0	no	#N/A	0
258	Hpan_g1438.t1	Adami_g10968.t1	PHAVENT1A001701P1	Petfic_v00_mik.OX345639.1G650.1	Choren_v00_mik.OX359201.1G619.1	Osclob_v00_mik.OX382153.1G200.3	4	740914	742266	233	13	4704711	4706941	725	4	4142013	4142952	762	24	4460322	4463797	614	4	14625747	14629023	1172	10	798844	800248	153	a	0	0	0	0	0	0	no	#N/A	0
259	Hpan_g14407.t1	Adami_g8975.t1	PHAVENT1A012097P1	Petfic_v00_mik.OX345649.1G20.1	Choren_v00_mik.OX359193.1G1259.1	Osclob_v00_mik.OX382154.1G177.1	5	624006	624541	206	5	7699057	7699669	1437	14	84165	84621	24	13	836384	837769	212	3	4539312	4542322	675	8	4085558	4087128	661	c	0	0	0	0	0	0	no	#N/A	0
260	Hpan_g14428.t1	Adami_g9150.t1	PHAVENT1A013939P1	Petfic_v00_mik.OX345649.1G240.1	Choren_v00_mik.OX359202.1G228.1	Osclob_v00_mik.OX382154.1G127.1	5	523264	523834	166	14	939994	940907	264	14	1415494	1417225	292	13	72448	73764	31	3	6693488	6700530	891	8	4288547	4290404	686	0	0	0	0	0	0	0	no	#N/A	0
261	Hpan_g14449.t1	Adami_g9257.t1	PHAVENT1A009478P1	Petfic_v00_mik.OX345649.1G174.1	Choren_v00_mik.OX359193.1G51.1	Osclob_v00_mik.OX382154.1G859.1	5	3555906	3556780	980	5	190829	192186	47	14	878324	880240	203	13	9844	11025	9	3	8877660	8878809	1015	8	4413320	4416776	708	c	0	0	0	0	0	0	no	#N/A	0
262	Hpan_g1445.t1	Adami_g10942.t1	PHAVENT1A001408P1	Petfic_v00_mik.OX345639.1G506.1	Choren_v00_mik.OX359201.1G704.1	Osclob_v00_mik.OX382153.1G168.1	4	666721	668344	197	13	5275418	5278515	829	4	3526956	3533806	598	24	4264296	4269506	577	4	14454726	14457990	1141	10	827302	830236	161	a	0	0	0	0	0	0	no	#N/A	0
263	Hpan_g14455.t1	Adami_g9249.t1	PHAVENT1A013050P1	Petfic_v00_mik.OX345649.1G160.1	Choren_v00_mik.OX359198.1G876.1	Osclob_v00_mik.OX382163.1G270.1	14	1225478	1226680	333	10	6677618	6679181	1056	14	824129	825963	190	13	17210	19048	14	3	8847019	8852491	1003	8	4442848	4444114	714	0	0	0	0	0	0	0	no	#N/A	0
264	Hpan_g14456.t1	Adami_g9248.t1	PHAVENT1A006718P1	Petfic_v00_mik.OX345649.1G154.1	Choren_v00_mik.OX359193.1G1262.1	Osclob_v00_mik.OX382154.1G841.1	5	3503450	3504769	954	5	7724320	7725389	1449	14	768074	770118	177	13	19334	20373	15	3	8841614	8845695	1002	8	4444472	4448207	715	c	0	0	0	0	0	0	no	#N/A	0
265	Hpan_g14487.t1	Adami_g8922.t1	PHAVENT1A021948P1	Petfic_v00_mik.OX345649.1G111.1	Choren_v00_mik.OX359189.1G691.1	Osclob_v00_mik.OX382153.1G327.1	4	1155227	1157804	372	1	4628974	4642183	821	14	459946	463986	126	13	726298	730879	190	3	4057830	4064137	608	8	4837548	4842268	753	0	0	0	0	0	0	0	no	#N/A	0
266	Hpan_g14510.t1	Adami_g13592.t1	PHAVENT1A007192P1	Petfic_v00_mik.OX345649.1G218.1	Choren_v00_mik.OX359193.1G1254.1	Osclob_v00_mik.OX382154.1G885.1	5	3585334	3586086	994	5	7697995	7698886	1436	14	1227775	1229757	263	13	548592	550278	147	6	3110040	3110976	508	8	4997448	4999363	777	c	0	0	0	0	0	0	no	#N/A	0
267	Hpan_g14512.t2	Adami_g9267.t1	PHAVENT1A013085P1	Petfic_v00_mik.OX345649.1G221.1	Choren_v00_mik.OX359193.1G242.1	Osclob_v00_mik.OX382154.1G298.1	5	1021094	1022009	355	5	1114693	1117517	285	14	1232906	1235854	265	13	543947	546021	145	3	9014944	9018317	1028	8	5003064	5005325	779	c	0	0	0	0	0	0	no	#N/A	0
270	Hpan_g1462.t1	Adami_g11186.t1	PHAVENT1A023215P1	Petfic_v00_mik.OX345639.1G482.1	Choren_v00_mik.OX359201.1G555.1	Osclob_v00_mik.OX382153.1G578.1	4	2134396	2139289	652	13	4277775	4289516	651	4	3399261	3412636	574	24	4942230	4953156	697	4	15244448	15256212	1417	10	907165	914175	179	a	0	0	0	0	0	0	no	#N/A	0
273	Hpan_g14650.t1	Adami_g8966.t1	PHAVENT1A022133P1	Petfic_v00_mik.OX345649.1G117.1	Choren_v00_mik.OX359193.1G946.1	Osclob_v00_mik.OX382167.1G254.1	18	818860	819460	272	5	6133932	6134339	1069	14	575027	575429	135	13	3018924	3022119	451	3	4458651	4459153	663	8	5856333	5856785	938	0	0	0	0	0	0	0	no	#N/A	0
274	Hpan_g14652.t1	Adami_g8964.t1	PHAVENT1A015492P1	Petfic_v00_mik.OX345649.1G113.1	Choren_v00_mik.OX359193.1G974.1	Osclob_v00_mik.OX382154.1G161.1	5	588845	601130	200	5	6299331	6317606	1099	14	484208	509295	131	13	3032165	3087187	453	3	4423419	4448594	661	8	5859784	5893931	940	c	0	0	0	0	0	0	no	#N/A	0
275	Hpan_g1466.t1	Adami_g10813.t1	PHAVENT1A000250P1	Petfic_v00_mik.OX345639.1G395.1	Choren_v00_mik.OX359201.1G976.1	Osclob_v00_mik.OX382150.1G846.1	1	2861647	2863179	1008	13	6725154	6726638	1155	4	2664944	2670124	469	24	3560177	3563202	460	4	12542466	12549438	993	10	923072	925146	183	a	0	0	0	0	0	0	no	#N/A	0
277	Hpan_g14683.t1	Adami_g8979.t1	PHAVENT1A016476P1	Petfic_v00_mik.OX345649.1G96.1	Choren_v00_mik.OX359192.1G2.1	Osclob_v00_mik.OX382154.1G133.1	5	464073	467455	148	4	5979	8312	1	14	397069	400324	107	13	823511	827505	208	3	4549774	4555640	679	8	6171048	6174698	975	0	0	0	0	0	0	0	no	#N/A	0
278	Hpan_g14685.t1	Adami_g8926.t1	PHAVENT1A018593P1	Petfic_v00_mik.OX345649.1G31.1	Choren_v00_mik.OX359193.1G783.1	Osclob_v00_mik.OX382154.1G275.1	5	927680	931052	314	5	5096966	5111757	877	14	105816	111778	31	13	697522	709814	185	3	4078895	4096392	612	8	6185189	6191533	977	c	0	0	0	0	0	0	no	#N/A	0
279	Hpan_g14689.t1	Adami_g8974.t1	PHAVENT1A007397P1	Petfic_v00_mik.OX345649.1G18.1	Choren_v00_mik.OX359195.1G1048.1	Osclob_v00_mik.OX382154.1G163.1	5	622101	623878	205	7	7329842	7333693	1213	14	82248	84087	23	13	3247213	3277739	473	3	4524522	4532449	674	8	6210594	6213773	981	0	0	0	0	0	0	0	no	#N/A	0
280	Hpan_g1472.t1	Adami_g10828.t1	PHAVENT1A019787P1	Petfic_v00_mik.OX345639.1G480.1	Choren_v00_mik.OX359201.1G677.1	Osclob_v00_mik.OX382153.1G977.1	4	3484535	3486443	1126	13	5040890	5046094	796	4	3389579	3394693	570	24	3489701	3495038	447	4	12700879	12714596	1008	10	940329	955363	189	a	0	0	0	0	0	0	no	#N/A	0
281	Hpan_g14721.t1	Adami_g8954.t1	PHAVENT1A014243P1	Petfic_v00_mik.OX345649.1G128.1	Choren_v00_mik.OX359193.1G745.1	Osclob_v00_mik.OX382154.1G45.1	5	214011	216956	62	5	4853117	4860725	829	14	624265	635306	144	13	1937980	1945910	367	3	4302428	4310772	646	8	6409393	6417705	1019	c	0	0	0	0	0	0	no	#N/A	0
282	Hpan_g14736.t1	Adami_g8981.t1	PHAVENT1A014502P1	Petfic_v00_mik.OX345649.1G12.1	Choren_v00_mik.OX359200.1G783.1	Osclob_v00_mik.OX382154.1G4.1	5	30074	31394	7	12	5723452	5726018	902	14	52580	53911	10	13	1728913	1740378	342	3	4559820	4570499	681	8	6502969	6507751	1041	0	0	0	0	0	0	0	no	#N/A	0
284	Hpan_g14767.t1	Adami_g9049.t1	PHAVENT1A018733P1	Petfic_v00_mik.OX345649.1G308.1	Choren_v00_mik.OX359193.1G305.1	Osclob_v00_mik.OX382154.1G37.1	5	176826	179606	49	5	1607145	1618319	357	14	2007801	2019873	373	13	1219247	1226757	284	3	5354684	5367046	766	8	6775619	6780832	1074	c	0	0	0	0	0	0	no	#N/A	0
285	Hpan_g14768.t1	Adami_g8935.t1	PHAVENT1A021911P1	Petfic_v00_mik.OX345649.1G210.1	Choren_v00_mik.OX359193.1G944.1	Osclob_v00_mik.OX382154.1G220.1	5	783835	788588	265	5	6122623	6127348	1065	14	1154544	1163976	251	13	620496	626431	169	3	4176285	4184047	622	8	6781058	6785774	1075	c	0	0	0	0	0	0	no	#N/A	0
286	Hpan_g14770.t1	Adami_g8939.t1	PHAVENT1A019863P2	Petfic_v00_mik.OX345649.1G204.1	Choren_v00_mik.OX359189.1G713.1	Osclob_v00_mik.OX382154.1G320.1	5	1073634	1075651	375	1	4732824	4750406	842	14	1147995	1152474	249	13	614631	617995	166	3	4198175	4203568	627	8	6786821	6788841	1077	0	0	0	0	0	0	0	no	#N/A	0
288	Hpan_g14777.t1	Adami_g8903.t1	PHAVENT1A009946P1	Petfic_v00_mik.OX345649.1G83.1	Choren_v00_mik.OX359193.1G579.1	Osclob_v00_mik.OX382154.1G137.1	5	490387	491947	154	5	3951666	3966288	653	14	438730	439872	118	13	771217	772895	199	3	3946225	3947582	588	8	6807892	6809428	1084	c	0	0	0	0	0	0	no	#N/A	0
289	Hpan_g14778.t1	Adami_g9050.t1	PHAVENT1A002062P1	Petfic_v00_mik.OX345649.1G360.1	Choren_v00_mik.OX359193.1G88.1	Osclob_v00_mik.OX382154.1G318.1	5	1068429	1068940	373	5	348886	349564	103	14	2737229	2740925	436	13	1217612	1219375	283	3	5367134	5371380	767	8	6809654	6810321	1085	c	0	0	0	0	0	0	no	#N/A	0
290	Hpan_g14798.t1	Adami_g8856.t1	PHAVENT1A004810P1	Petfic_v00_mik.OX345649.1G33.1	Choren_v00_mik.OX359193.1G938.1	Osclob_v00_mik.OX382154.1G29.1	5	146784	148139	38	5	6096491	6098653	1059	14	121162	122762	36	13	407114	410746	114	3	3425530	3431382	531	8	6928345	6930341	1106	c	0	0	0	0	0	0	no	#N/A	0
291	Hpan_g14800.t1	Adami_g8934.t1	PHAVENT1A002014P1	Petfic_v00_mik.OX345649.1G208.1	Choren_v00_mik.OX359193.1G941.1	Osclob_v00_mik.OX382165.1G234.1	16	1349129	1350540	281	5	6127401	6129243	1066	14	1164026	1167987	252	13	656776	660192	176	3	4170345	4176120	621	8	6936092	6937588	1108	0	0	0	0	0	0	0	no	#N/A	0
292	Hpan_g14802.t1	Adami_g8898.t1	PHAVENT1A008054P1	Petfic_v00_mik.OX345649.1G110.1	Choren_v00_mik.OX359200.1G60.1	Osclob_v00_mik.OX382154.1G94.1	5	355501	356154	110	12	214814	215428	66	14	459502	459864	125	13	731134	732253	191	3	3917052	3918036	582	8	6941132	6941407	1110	0	0	0	0	0	0	0	no	#N/A	0
293	Hpan_g14806.t1	Adami_g8918.t1	PHAVENT1A010547P1	Petfic_v00_mik.OX345649.1G135.1	Choren_v00_mik.OX359193.1G929.1	Osclob_v00_mik.OX382154.1G44.1	5	206631	213762	61	5	6058665	6070666	1050	14	683853	697451	157	13	173935	184380	55	3	4023626	4042119	603	8	6952386	6959481	1114	c	0	0	0	0	0	0	no	#N/A	0
294	Hpan_g14815.t1	Adami_g9239.t1	PHAVENT1A003573P1	Petfic_v00_mik.OX345649.1G21.1	Choren_v00_mik.OX359193.1G9.1	Osclob_v00_mik.OX382150.1G134.1	1	431911	436130	160	5	77698	84067	12	14	92474	97061	26	13	258093	267505	78	3	8763377	8779097	989	8	6985884	6991084	1124	0	0	0	0	0	0	0	no	#N/A	0
295	Hpan_g14824.t1	Adami_g9161.t1	PHAVENT1A021980P2	Petfic_v00_mik.OX345649.1G77.1	Choren_v00_mik.OX359193.1G881.1	Osclob_v00_mik.OX382154.1G206.1	5	719689	721237	243	5	5745597	5750652	998	14	372162	373417	99	13	297274	302123	87	3	6809361	6811070	906	8	7013149	7016891	1135	c	0	0	0	0	0	0	no	#N/A	0
296	Hpan_g14826.t1	Adami_g9164.t1	PHAVENT1A002707P1	Petfic_v00_mik.OX345649.1G75.1	Choren_v00_mik.OX359193.1G883.1	Osclob_v00_mik.OX382154.1G388.1	5	1325786	1326509	460	5	5684512	5687280	984	14	366909	368622	97	13	294092	296043	85	3	6821848	6822998	910	8	7017142	7018329	1136	c	0	0	0	0	0	0	no	#N/A	0
297	Hpan_g14830.t1	Adami_g8885.t1	PHAVENT1A016026P1	Petfic_v00_mik.OX345649.1G15.1	Choren_v00_mik.OX359193.1G930.1	Osclob_v00_mik.OX382154.1G262.1	5	913070	914341	310	5	6072708	6076385	1052	14	66597	68230	18	13	235868	238494	74	3	3700239	3704205	568	8	7029191	7030408	1144	c	0	0	0	0	0	0	no	#N/A	0
298	Hpan_g14833.t1	Adami_g8889.t1	PHAVENT1A019491P1	Petfic_v00_mik.OX345649.1G47.1	Choren_v00_mik.OX359193.1G953.1	Osclob_v00_mik.OX382157.1G314.1	8	1220914	1222309	367	5	6189675	6191513	1077	14	235094	237163	63	13	121651	125143	39	3	3747859	3751055	572	8	7042138	7044172	1147	0	0	0	0	0	0	0	no	#N/A	0
299	Hpan_g14835.t1	Adami_g8893.t1	PHAVENT1A016201P1	Petfic_v00_mik.OX345649.1G52.1	Choren_v00_mik.OX359193.1G96.1	Osclob_v00_mik.OX382154.1G303.1	5	1012775	1014007	349	5	346170	347626	102	14	212913	214484	58	13	140806	145528	45	3	3774985	3778167	577	8	7046500	7047485	1150	c	0	0	0	0	0	0	no	#N/A	0
300	Hpan_g14837.t1	Adami_g8884.t1	PHAVENT1A018816P1	Petfic_v00_mik.OX345649.1G16.1	Choren_v00_mik.OX359193.1G366.1	Osclob_v00_mik.OX382154.1G235.1	5	846208	846861	286	5	2013187	2014282	427	14	69288	70062	20	13	230836	232162	72	3	3698841	3700051	567	8	7053304	7053956	1152	c	0	0	0	0	0	0	no	#N/A	0
301	Hpan_g14847.t1	Adami_g3047.t1	PHAVENT1A004045P1	Petfic_v00_mik.OX345642.1G60.1	Choren_v00_mik.OX359200.1G927.1	Osclob_v00_mik.OX382152.1G814.1	3	2981077	2983014	946	12	6528014	6536389	1070	7	231272	235368	77	21	1767564	1777934	351	11	1791945	1799445	344	9	14989	20996	6	b	0	0	0	0	0	0	no	#N/A	0
302	Hpan_g14857.t1	Adami_g3079.t1	PHAVENT1A008945P1	Petfic_v00_mik.OX345642.1G168.1	Choren_v00_mik.OX359200.1G945.1	Osclob_v00_mik.OX382152.1G524.1	3	1990343	1993026	609	12	6567095	6571614	1084	7	837618	843793	200	21	2386466	2394712	428	11	2011402	2016843	383	9	49814	53519	17	b	0	0	0	0	0	0	no	#N/A	0
303	Hpan_g14877.t1	Adami_g3060.t1	PHAVENT1A011920P1	Petfic_v00_mik.OX345642.1G271.1	Choren_v00_mik.OX359200.1G883.1	Osclob_v00_mik.OX382152.1G726.1	3	2673779	2674429	844	12	6247567	6248961	1019	7	1538265	1540458	311	21	1895285	1897506	368	11	1881039	1883390	357	9	136615	137572	42	b	0	0	0	0	0	0	no	#N/A	0
304	Hpan_g14882.t1	Adami_g3052.t1	PHAVENT1A016768P1	Petfic_v00_mik.OX345642.1G70.1	Choren_v00_mik.OX359200.1G874.1	Osclob_v00_mik.OX382156.1G132.1	7	495279	495739	154	12	6211101	6212103	1009	7	272801	273356	85	21	1792888	1794146	357	11	1811791	1812925	349	9	152060	153133	48	0	0	0	0	0	0	0	no	#N/A	0
305	Hpan_g14883.t1	Adami_g3053.t1	PHAVENT1A009028P1	Petfic_v00_mik.OX345642.1G77.1	Choren_v00_mik.OX359200.1G872.1	Osclob_v00_mik.OX382152.1G818.1	3	2983087	2983911	947	12	6212277	6213516	1010	7	271269	272689	84	21	1794072	1796941	358	11	1813163	1816034	350	9	153331	154455	49	b	0	0	0	0	0	0	no	#N/A	0
306	Hpan_g14897.t1	Adami_g471.t1	PHAVENT1A020476P1	Petfic_v00_mik.OX345645.1G400.1	Choren_v00_mik.OX359194.1G565.1	Osclob_v00_mik.OX382159.1G296.1	10	1039814	1041762	342	6	5013116	5017584	666	10	2534968	2540181	479	22	158248	162392	36	1	3679956	3684059	430	9	206023	208734	66	0	0	0	0	0	0	0	no	#N/A	0
307	Hpan_g14920.t1	Adami_g3382.t1	PHAVENT1A016786P1	Petfic_v00_mik.OX345642.1G290.1	Choren_v00_mik.OX359200.1G617.1	Osclob_v00_mik.OX382152.1G1133.1	3	3943131	3944271	1306	12	4495181	4499606	714	7	1625319	1634698	330	21	2063579	2069764	397	11	4726546	4737487	743	9	388189	390384	91	b	0	0	0	0	0	0	no	#N/A	0
308	Hpan_g14950.t1	Adami_g3375.t1	PHAVENT1A016828P1	Petfic_v00_mik.OX345639.1G593.1	Choren_v00_mik.OX359201.1G782.1	Osclob_v00_mik.OX382153.1G633.1	4	2333155	2334478	729	13	5832174	5833821	932	4	3987315	3988891	702	21	1965960	1968727	382	11	4639602	4655864	735	9	466534	467866	121	a	0	0	0	0	0	0	no	#N/A	0
309	Hpan_g14968.t1	Adami_g3368.t1	PHAVENT1A022573P1	Petfic_v00_mik.OX345642.1G99.1	Choren_v00_mik.OX359200.1G1041.1	Osclob_v00_mik.OX382161.1G432.1	12	1766223	1782179	496	12	7162797	7166513	1209	7	427079	429354	115	21	1001372	1007773	234	11	4413395	4420323	728	9	625235	628182	140	0	0	0	0	0	0	0	no	#N/A	0
310	Hpan_g15003.t1	Adami_g3303.t1	PHAVENT1A014109P1	Petfic_v00_mik.OX345642.1G52.1	Choren_v00_mik.OX359200.1G1111.1	Osclob_v00_mik.OX382152.1G965.1	3	3450170	3450570	1122	12	7490320	7490723	1283	7	190159	191452	60	21	260075	260600	73	11	3740165	3741075	647	9	898262	898815	178	b	0	0	0	0	0	0	no	#N/A	0
311	Hpan_g15007.t1	Adami_g3300.t1	PHAVENT1A010120P1	Petfic_v00_mik.OX345642.1G31.1	Choren_v00_mik.OX359196.1G436.1	Osclob_v00_mik.OX382160.1G320.1	11	961475	962172	349	8	3885894	3886482	516	7	129007	130023	41	21	225256	230702	62	11	3712462	3713065	644	9	921304	921913	182	0	0	0	0	0	0	0	no	#N/A	0
312	Hpan_g15010.t1	Adami_g3297.t1	PHAVENT1A015197P1	Petfic_v00_mik.OX345642.1G44.1	Choren_v00_mik.OX359200.1G618.1	Osclob_v00_mik.OX382152.1G933.1	3	3381734	3382494	1095	12	4499821	4501635	715	7	140147	142286	44	21	205848	209179	57	11	3680718	3684185	641	9	934333	935919	185	b	0	0	0	0	0	0	no	#N/A	0
313	Hpan_g15021.t1	Adami_g3287.t1	PHAVENT1A002037P1	Petfic_v00_mik.OX345642.1G29.1	Choren_v00_mik.OX359192.1G240.1	Osclob_v00_mik.OX382152.1G815.1	3	2983960	2986530	948	4	1482639	1484686	306	7	113792	115003	35	21	155035	157375	42	11	3635811	3638283	631	9	984277	985995	197	0	0	0	0	0	0	0	no	#N/A	0
314	Hpan_g15025.t1	Adami_g3282.t1	PHAVENT1A022420P1	Petfic_v00_mik.OX345641.1G321.1	Choren_v00_mik.OX359195.1G1220.1	Osclob_v00_mik.OX382167.1G190.1	18	549728	550372	205	7	8214233	8215302	1429	6	2198684	2201507	385	21	176850	180529	50	11	3596089	3598503	625	9	990898	992043	201	g	0	0	0	0	0	0	no	#N/A	0
316	Hpan_g15085.t1	Adami_g3333.t1	PHAVENT1A015821P1	Petfic_v00_mik.OX345642.1G359.1	Choren_v00_mik.OX359200.1G600.1	Osclob_v00_mik.OX382152.1G643.1	3	2393316	2394453	752	12	4387775	4396040	693	7	2194886	2216166	418	21	1208693	1217162	273	11	4013041	4024479	687	9	1370077	1372158	275	b	0	0	0	0	0	0	no	#N/A	0
317	Hpan_g15088.t1	Adami_g490.t1	PHAVENT1A011059P1	Petfic_v00_mik.OX345645.1G366.1	Choren_v00_mik.OX359192.1G712.1	Osclob_v00_mik.OX382159.1G359.1	10	1315446	1317088	408	4	5559074	5561366	843	10	2186392	2188833	440	22	263746	266433	74	1	3870073	3872410	450	9	1396161	1397985	278	d	0	0	0	0	0	0	no	#N/A	0
318	Hpan_g15130.t1	Adami_g3264.t1	PHAVENT1A008110P1	Petfic_v00_mik.OX345642.1G231.1	Choren_v00_mik.OX359200.1G1065.1	Osclob_v00_mik.OX382152.1G860.1	3	3141103	3141705	995	12	7326011	7326828	1239	7	1224132	1225179	264	21	317694	318965	87	11	3486061	3488872	602	9	1613761	1615303	323	b	0	0	0	0	0	0	no	#N/A	0
319	Hpan_g15146.t1	Adami_g3267.t1	PHAVENT1A018564P1	Petfic_v00_mik.OX345642.1G225.1	Choren_v00_mik.OX359200.1G341.1	Osclob_v00_mik.OX382152.1G1085.1	3	3847210	3848255	1265	12	1588334	1593144	399	7	1163798	1167932	252	21	321804	324154	92	11	3494646	3499833	606	9	1710173	1712310	340	b	0	0	0	0	0	0	no	#N/A	0
320	Hpan_g15151.t1	Adami_g3087.t1	PHAVENT1A016732P1	Petfic_v00_mik.OX345642.1G259.1	Choren_v00_mik.OX359200.1G1015.1	Osclob_v00_mik.OX382152.1G1125.1	3	3949929	3950542	1309	12	7022072	7023457	1182	7	1494156	1497328	299	21	1918242	1925842	372	11	2076204	2082911	392	9	1724762	1727037	347	b	0	0	0	0	0	0	no	#N/A	0
321	Hpan_g15190.t1	Adami_g3315.t1	PHAVENT1A017540P1	Petfic_v00_mik.OX345642.1G151.1	Choren_v00_mik.OX359200.1G129.1	Osclob_v00_mik.OX382152.1G604.1	3	2242410	2246864	704	12	503660	505988	151	7	734348	736972	181	21	652852	655171	169	11	3833460	3837515	661	9	2193594	2196033	391	b	0	0	0	0	0	0	no	#N/A	0
322	Hpan_g15207.t1	Adami_g3183.t1	PHAVENT1A002028P1	Petfic_v00_mik.OX345642.1G35.1	Choren_v00_mik.OX359200.1G314.1	Osclob_v00_mik.OX382152.1G854.1	3	3127005	3129537	991	12	1424631	1427214	364	7	157892	159150	49	21	122836	125021	33	11	3051486	3053783	506	9	2301306	2305384	409	b	0	0	0	0	0	0	no	#N/A	0
324	Hpan_g15238.t1	Adami_g3254.t1	PHAVENT1A016935P1	Petfic_v00_mik.OX345642.1G19.1	Choren_v00_mik.OX359200.1G344.1	Osclob_v00_mik.OX382152.1G598.1	3	2213455	2215641	693	12	1595838	1603997	401	7	105692	108517	31	21	407867	413915	103	11	3443488	3451077	590	9	2482948	2503239	442	b	0	0	0	0	0	0	no	#N/A	0
325	Hpan_g15247.t1	Adami_g3248.t1	PHAVENT1A013856P1	Petfic_v00_mik.OX345642.1G124.1	Choren_v00_mik.OX359200.1G817.1	Osclob_v00_mik.OX382152.1G984.1	3	3450700	3452070	1123	12	5922813	5925417	940	7	568730	571029	153	21	497380	502172	135	11	3421836	3424737	582	9	2525413	2529703	451	b	0	0	0	0	0	0	no	#N/A	0
326	Hpan_g15253.t1	Adami_g3242.t1	PHAVENT1A021684P1	Petfic_v00_mik.OX345642.1G130.1	Choren_v00_mik.OX359200.1G268.1	Osclob_v00_mik.OX382152.1G937.1	3	3333672	3334151	1072	12	1218530	1218943	313	7	533373	534521	140	21	482876	484118	128	11	3403587	3404102	576	9	2544537	2550037	463	b	0	0	0	0	0	0	no	#N/A	0
327	Hpan_g15286.t1	Adami_g3103.t1	PHAVENT1A000703P1	Petfic_v00_mik.OX345642.1G266.1	Choren_v00_mik.OX359200.1G334.1	Osclob_v00_mik.OX382152.1G757.1	3	2756917	2758918	877	12	1556636	1559207	391	7	1510682	1516762	306	21	3485661	3492672	510	11	2223926	2228987	410	9	2714166	2717884	503	b	0	0	0	0	0	0	no	#N/A	0
328	Hpan_g15304.t1	Adami_g3138.t1	PHAVENT1A002555P2	Petfic_v00_mik.OX345642.1G979.1	Choren_v00_mik.OX359200.1G173.1	Osclob_v00_mik.OX382152.1G552.1	3	2077978	2079664	641	12	771311	773815	204	7	7414280	7416418	1136	21	2704498	2727547	450	11	2576607	2583338	450	9	2838999	2849570	524	b	0	0	0	0	0	0	no	#N/A	0
329	Hpan_g15359.t1	Adami_g3140.t1	PHAVENT1A018958P1	Petfic_v00_mik.OX345642.1G964.1	Choren_v00_mik.OX359200.1G386.1	Osclob_v00_mik.OX382156.1G639.1	7	2637647	2639288	736	12	1844085	1850113	451	7	7409375	7412015	1134	21	2667138	2690336	448	11	2640345	2646934	452	9	3320871	3353045	581	0	0	0	0	0	0	0	no	#N/A	0
337	Hpan_g15464.t1	Adami_g13162.t1	PHAVENT1A017446P1	Petfic_v00_mik.OX345638.1G824.1	Choren_v00_mik.OX359193.1G1481.1	Osclob_v00_mik.OX382163.1G277.1	14	1230520	1233941	336	5	8762576	8765855	1704	3	7292894	7300054	960	20	5882565	5891156	782	5	20070278	20095752	1778	9	4283727	4293405	699	c	0	0	0	0	0	0	no	#N/A	0
338	Hpan_g15465.t1	Adami_g13163.t1	PHAVENT1A022038P1	Petfic_v00_mik.OX345638.1G828.1	Choren_v00_mik.OX359193.1G1480.1	Osclob_v00_mik.OX382163.1G272.1	14	1233997	1234607	337	5	8766113	8766594	1705	3	7289380	7292805	959	20	5881081	5882495	781	5	20096066	20098180	1779	9	4293697	4294153	700	c	0	0	0	0	0	0	no	#N/A	0
339	Hpan_g15486.t1	Adami_g12822.t1	PHAVENT1A005521P1	Petfic_v00_mik.OX345645.1G185.1	Choren_v00_mik.OX359201.1G299.1	Osclob_v00_mik.OX382159.1G422.1	10	1458864	1462145	468	13	1596688	1604017	363	10	1003527	1010742	211	20	159867	164619	40	5	15984736	15991909	1358	9	4381469	4384207	724	0	0	0	0	0	0	0	no	#N/A	0
340	Hpan_g15489.t1	Adami_g12895.t1	PHAVENT1A021205P1	Petfic_v00_mik.OX345638.1G104.1	Choren_v00_mik.OX359193.1G1118.1	Osclob_v00_mik.OX382163.1G506.1	14	2239518	2240349	606	5	7064882	7066499	1275	3	357259	358692	115	20	125033	126383	33	5	16406328	16408086	1459	9	4390758	4391920	727	c	0	0	0	0	0	0	no	#N/A	0
341	Hpan_g15491.t1	Adami_g12827.t1	PHAVENT1A009102P1	Petfic_v00_mik.OX345638.1G92.1	Choren_v00_mik.OX359200.1G306.1	Osclob_v00_mik.OX382163.1G414.1	14	1925424	1926428	495	12	1378572	1379793	354	3	307295	308513	105	20	175237	176115	47	5	16004932	16007270	1363	9	4392836	4393743	729	0	0	0	0	0	0	0	no	#N/A	0
342	Hpan_g15504.t1	Adami_g13082.t1	PHAVENT1A019184P1	Petfic_v00_mik.OX345638.1G1266.1	Choren_v00_mik.OX359193.1G994.1	Osclob_v00_mik.OX382163.1G330.1	14	1522995	1526718	395	5	6412014	6416309	1122	3	10998867	11006100	1433	20	5153223	5159994	661	5	19026292	19033210	1685	9	4437907	4440189	743	c	0	0	0	0	0	0	no	#N/A	0
343	Hpan_g15511.t1	Adami_g12896.t1	PHAVENT1A005425P1	Petfic_v00_mik.OX345638.1G179.1	Choren_v00_mik.OX359193.1G1005.1	Osclob_v00_mik.OX382163.1G436.1	14	2002228	2004308	526	5	6454950	6458945	1135	3	1185956	1195653	221	20	120920	123909	32	5	16408511	16414866	1460	9	4457808	4461135	750	c	0	0	0	0	0	0	no	#N/A	0
344	Hpan_g15525.t1	Adami_g12902.t1	PHAVENT1A010492P1	Petfic_v00_mik.OX345638.1G100.1	Choren_v00_mik.OX359193.1G1245.1	Osclob_v00_mik.OX382163.1G379.1	14	1745298	1753506	451	5	7634646	7641934	1421	3	374149	392005	120	20	94494	107803	27	5	16455133	16468316	1469	9	4507071	4517426	770	c	0	0	0	0	0	0	no	#N/A	0
345	Hpan_g15585.t1	Adami_g13014.t1	PHAVENT1A013139P1	Petfic_v00_mik.OX345638.1G14.1	Choren_v00_mik.OX359193.1G1122.1	Osclob_v00_mik.OX382163.1G458.1	14	2067739	2068177	550	5	7103181	7103828	1287	3	85476	85945	26	20	2956870	2960465	484	5	17743648	17748076	1608	9	4811634	4822409	843	c	0	0	0	0	0	0	no	#N/A	0
346	Hpan_g15610.t1	Adami_g12596.t1	PHAVENT1A022022P1	Petfic_v00_mik.OX345638.1G58.1	Choren_v00_mik.OX359193.1G1012.1	Osclob_v00_mik.OX382163.1G542.1	14	2362000	2363025	648	5	6484593	6486115	1143	3	168747	170225	61	20	970732	972140	262	5	12112441	12116056	1074	9	4931822	4932958	868	c	0	0	0	0	0	0	no	#N/A	0
347	Hpan_g15669.t1	Adami_g12624.t1	PHAVENT1A013587P1	Petfic_v00_mik.OX345638.1G8.1	Choren_v00_mik.OX359193.1G1072.1	Osclob_v00_mik.OX382163.1G319.1	14	1394139	1395445	378	5	6858547	6859615	1215	3	52744	53093	12	20	648882	650975	189	5	12475600	12479346	1105	9	5244434	5244819	933	c	0	0	0	0	0	0	no	#N/A	0
348	Hpan_g15685.t1	Adami_g12591.t1	PHAVENT1A023357P1	Petfic_v00_mik.OX345638.1G21.1	Choren_v00_mik.OX359193.1G1330.1	Osclob_v00_mik.OX382166.1G233.1	NA	715398	717225	262	5	8099622	8105309	1517	3	65989	69071	19	20	955961	959573	259	5	12074416	12088630	1069	9	5287363	5289950	949	0	0	0	0	0	0	0	no	#N/A	0
349	Hpan_g15691.t1	Adami_g12698.t1	PHAVENT1A002024P1	Petfic_v00_mik.OX345638.1G155.1	Choren_v00_mik.OX359193.1G1214.1	Osclob_v00_mik.OX382163.1G383.1	14	1778840	1781199	459	5	7576835	7578764	1400	3	839964	844848	183	20	673904	677293	192	5	13938478	13942834	1196	9	5304460	5306332	956	c	0	0	0	0	0	0	no	#N/A	0
350	Hpan_g15717.t1	Adami_g12952.t1	PHAVENT1A014892P1	Petfic_v00_mik.OX345638.1G1020.1	Choren_v00_mik.OX359193.1G1446.1	Osclob_v00_mik.OX382163.1G310.1	14	1508906	1511684	392	5	8627725	8630905	1667	3	8912612	8919540	1180	20	4585941	4605140	572	5	16942877	16951506	1536	9	5433625	5437122	988	c	0	0	0	0	0	0	no	#N/A	0
351	Hpan_g15733.t1	Adami_g12807.t1	PHAVENT1A000716P1	Petfic_v00_mik.OX345638.1G137.1	Choren_v00_mik.OX359193.1G1084.1	Osclob_v00_mik.OX382163.1G487.1	14	2162204	2169194	582	5	6949629	6958125	1233	3	669549	683028	160	20	1047571	1059784	278	5	15838672	15850432	1334	9	5473121	5482012	1005	c	0	0	0	0	0	0	no	#N/A	0
352	Hpan_g15750.t1	Adami_g12754.t1	PHAVENT1A004645P1	Petfic_v00_mik.OX345638.1G165.1	Choren_v00_mik.OX359193.1G1079.1	Osclob_v00_mik.OX382163.1G180.1	14	843650	844558	221	5	6897923	6899417	1226	3	1039129	1040281	206	20	1671767	1672909	347	5	14977636	14978806	1271	9	5593166	5594363	1024	c	0	0	0	0	0	0	no	#N/A	0
353	Hpan_g15756.t1	Adami_g12770.t1	PHAVENT1A007391P1	Petfic_v00_mik.OX345638.1G148.1	Choren_v00_mik.OX359199.1G574.1	Osclob_v00_mik.OX382154.1G150.1	5	543622	546556	177	11	4386371	4393063	686	3	799539	807665	179	20	1417311	1427715	331	5	15162384	15170398	1289	9	5614097	5619054	1030	0	0	0	0	0	0	0	no	#N/A	0
355	Hpan_g15784.t1	Adami_g12839.t1	PHAVENT1A002552P1	Petfic_v00_mik.OX345638.1G64.1	Choren_v00_mik.OX359193.1G1393.1	Osclob_v00_mik.OX382163.1G439.1	14	2023774	2024140	532	5	8397293	8400635	1598	3	205965	208635	74	20	231509	236282	72	5	16066610	16074396	1377	9	5765008	5767727	1059	c	0	0	0	0	0	0	no	#N/A	0
356	Hpan_g15816.t1	Adami_g13175.t1	PHAVENT1A016551P1	Petfic_v00_mik.OX345638.1G678.1	Choren_v00_mik.OX359193.1G1437.1	Osclob_v00_mik.OX382165.1G230.1	16	1352201	1354857	283	5	8604756	8607416	1660	3	5845428	5850368	798	20	5918322	5921402	790	5	20230725	20236520	1793	9	5920511	5924301	1094	0	0	0	0	0	0	0	no	#N/A	0
357	Hpan_g15817.t1	Adami_g13176.t1	PHAVENT1A023352P1	Petfic_v00_mik.OX345638.1G800.1	Choren_v00_mik.OX359193.1G1466.1	Osclob_v00_mik.OX382163.1G513.1	14	2286726	2292905	623	5	8699782	8705773	1688	3	7072115	7099595	933	20	5921726	5928954	791	5	20236822	20247127	1794	9	5924733	5932078	1095	c	0	0	0	0	0	0	no	#N/A	0
358	Hpan_g15822.t1	Adami_g12972.t1	PHAVENT1A007858P1	Petfic_v00_mik.OX345638.1G1316.1	Choren_v00_mik.OX359193.1G1413.1	Osclob_v00_mik.OX382163.1G551.1	14	2391739	2393252	654	5	8480253	8482536	1632	3	11331603	11333402	1490	20	4400372	4408743	564	5	17167492	17174486	1558	9	5939564	5941419	1100	c	0	0	0	0	0	0	no	#N/A	0
359	Hpan_g15826.t1	Adami_g13179.t1	PHAVENT1A006702P1	Petfic_v00_mik.OX345638.1G1006.1	Choren_v00_mik.OX359193.1G1431.1	Osclob_v00_mik.OX382163.1G561.1	14	2448657	2451641	670	5	8584392	8588540	1653	3	8821298	8830145	1160	20	5931440	5938198	793	5	20254201	20264599	1797	9	5950685	5954030	1104	c	0	0	0	0	0	0	no	#N/A	0
360	Hpan_g1583.t1	Adami_g10907.t1	PHAVENT1A022229P1	Petfic_v00_mik.OX345639.1G375.1	Choren_v00_mik.OX359201.1G215.1	Osclob_v00_mik.OX382153.1G881.1	4	3113532	3114982	997	13	1081021	1084465	261	4	2510086	2513595	447	24	2488210	2500779	350	4	14146233	14152245	1098	10	1691134	1694287	311	a	0	0	0	0	0	0	no	#N/A	0
363	Hpan_g1589.t1	Adami_g10888.t1	PHAVENT1A011700P1	Petfic_v00_mik.OX345639.1G379.1	Choren_v00_mik.OX359201.1G312.1	Osclob_v00_mik.OX382153.1G886.1	4	3151143	3152417	1009	13	1695152	1700549	379	4	2564658	2570107	452	24	3007448	3014707	401	4	13787835	13799192	1077	10	1734981	1737683	318	a	0	0	0	0	0	0	no	#N/A	0
365	Hpan_g15953.t1	Adami_g12663.t1	PHAVENT1A000325P1	Petfic_v00_mik.OX345649.1G640.1	Choren_v00_mik.OX359193.1G27.1	Osclob_v00_mik.OX382163.1G484.1	14	2159175	2162060	581	5	134395	136902	33	14	5134296	5136505	778	20	739419	741317	212	5	13418502	13420380	1152	9	6477051	6479021	1252	c	0	0	0	0	0	0	no	#N/A	0
366	Hpan_g15958.t1	Adami_g12661.t1	PHAVENT1A020469P1	Petfic_v00_mik.OX345639.1G44.1	Choren_v00_mik.OX359189.1G1463.1	Osclob_v00_mik.OX382153.1G43.1	4	182341	184654	59	1	9227201	9229078	1788	4	244115	246320	49	20	862279	863880	233	5	13394834	13396463	1150	9	6495733	6497224	1257	0	0	0	0	0	0	0	no	#N/A	0
368	Hpan_g15988.t1	Adami_g13023.t1	PHAVENT1A000782P1	Petfic_v00_mik.OX345638.1G453.1	Choren_v00_mik.OX359193.1G1178.1	Osclob_v00_mik.OX382163.1G391.1	14	1865089	1866142	473	5	7380794	7382545	1345	3	3703552	3711196	543	20	4001619	4004167	535	5	17878467	17881112	1618	9	6604614	6605677	1290	c	0	0	0	0	0	0	no	#N/A	0
370	Hpan_g16028.t1	Adami_g12873.t1	PHAVENT1A011004P1	Petfic_v00_mik.OX345638.1G72.1	Choren_v00_mik.OX359193.1G1059.1	Osclob_v00_mik.OX382163.1G169.1	14	812130	813759	209	5	6788959	6792258	1202	3	240008	242848	84	20	334239	337212	96	5	16279757	16287472	1427	9	6796560	6799139	1339	c	0	0	0	0	0	0	no	#N/A	0
372	Hpan_g16040.t1	Adami_g12860.t1	PHAVENT1A002878P1	Petfic_v00_mik.OX345638.1G80.1	Choren_v00_mik.OX359193.1G1196.1	Osclob_v00_mik.OX382163.1G412.1	14	1932520	1933994	502	5	7458076	7460072	1361	3	251960	255206	89	20	378563	384579	112	5	16176141	16181483	1407	9	6856116	6857794	1353	c	0	0	0	0	0	0	no	#N/A	0
373	Hpan_g16044.t1	Adami_g12855.t1	PHAVENT1A012946P1	Petfic_v00_mik.OX345638.1G88.1	Choren_v00_mik.OX359193.1G1192.1	Osclob_v00_mik.OX382163.1G255.1	14	1147923	1149333	321	5	7467808	7470274	1366	3	278135	280535	98	20	359066	362135	106	5	16154004	16158222	1400	9	6863898	6865612	1357	c	0	0	0	0	0	0	no	#N/A	0
374	Hpan_g16051.t1	Adami_g12848.t1	PHAVENT1A002912P1	Petfic_v00_mik.OX345638.1G60.1	Choren_v00_mik.OX359193.1G1099.1	Osclob_v00_mik.OX382163.1G425.1	14	1964062	1965511	514	5	7022454	7024981	1256	3	177290	181138	65	20	336772	339803	97	5	16126828	16130469	1393	9	6877603	6880514	1364	c	0	0	0	0	0	0	no	#N/A	0
375	Hpan_g16057.t1	Adami_g15314.t1	PHAVENT1A023021P1	Petfic_v00_mik.OX345638.1G44.1	Choren_v00_mik.OX359193.1G1164.1	Osclob_v00_mik.OX382166.1G225.1	NA	709445	711246	257	5	7305397	7307642	1326	3	157329	159282	55	20	884569	887280	243	7	7381442	7389219	616	9	6893595	6895209	1371	0	0	0	0	0	0	0	no	#N/A	0
376	Hpan_g16072.t1	Adami_g12401.t1	PHAVENT1A019301P1	Petfic_v00_mik.OX345638.1G22.1	Choren_v00_mik.OX359193.1G1211.1	Osclob_v00_mik.OX382167.1G240.1	18	760260	763361	256	5	7552526	7555778	1392	3	70235	73919	21	20	867562	873383	236	5	8235513	8256125	860	9	6947604	6948663	1388	0	0	0	0	0	0	0	no	#N/A	0
377	Hpan_g16085.t1	Adami_g12893.t1	PHAVENT1A020830P1	Petfic_v00_mik.OX345638.1G335.1	Choren_v00_mik.OX359193.1G1204.1	Osclob_v00_mik.OX382163.1G416.1	14	1930378	1932421	501	5	7508351	7511681	1376	3	2413679	2426447	392	20	594615	597999	168	5	16391256	16399597	1456	9	6987045	6989611	1402	c	0	0	0	0	0	0	no	#N/A	0
378	Hpan_g1613.t1	Adami_g10913.t1	PHAVENT1A004453P1	Petfic_v00_mik.OX345639.1G365.1	Choren_v00_mik.OX359201.1G621.1	Osclob_v00_mik.OX382153.1G560.1	4	2097290	2099515	636	13	4722007	4729819	728	4	2361155	2372308	436	24	4130753	4135451	553	4	14202805	14208726	1107	10	1963057	1968289	347	a	0	0	0	0	0	0	no	#N/A	0
380	Hpan_g1653.t1	Adami_g11181.t1	PHAVENT1A000433P1	Petfic_v00_mik.OX345639.1G497.1	Choren_v00_mik.OX359201.1G104.1	Osclob_v00_mik.OX382153.1G664.1	4	2457846	2458968	758	13	517829	521631	124	4	3468523	3471994	585	24	4979385	4982088	705	4	15210715	15213497	1412	10	2218881	2220435	391	a	0	0	0	0	0	0	no	#N/A	0
381	Hpan_g1675.t1	Adami_g11233.t1	PHAVENT1A002085P1	Petfic_v00_mik.OX345639.1G568.1	Choren_v00_mik.OX359201.1G349.1	Osclob_v00_mik.OX382166.1G15.1	NA	47357	48672	14	13	2058429	2063546	431	4	3924856	3926355	684	24	5217170	5219537	760	4	15617771	15620613	1477	10	2558290	2560655	414	0	0	0	0	0	0	0	no	#N/A	0
382	Hpan_g1722.t1	Adami_g10938.t1	PHAVENT1A015320P1	Petfic_v00_mik.OX345639.1G501.1	Choren_v00_mik.OX359201.1G159.1	Osclob_v00_mik.OX382153.1G917.1	4	3300241	3300697	1051	13	780982	781922	195	4	3505345	3506236	593	24	4239672	4241813	573	4	14425911	14427911	1137	10	2752625	2753774	468	a	0	0	0	0	0	0	no	#N/A	0
383	Hpan_g1752.t1	Adami_g10950.t1	PHAVENT1A006425P1	Petfic_v00_mik.OX345639.1G630.1	Choren_v00_mik.OX359201.1G715.1	Osclob_v00_mik.OX382153.1G880.1	4	3104070	3105278	994	13	5349603	5352859	850	4	4121047	4122496	755	24	4327042	4336939	590	4	14508839	14519082	1151	10	2923517	2930953	501	a	0	0	0	0	0	0	no	#N/A	0
384	Hpan_g1759.t1	Adami_g11141.t1	PHAVENT1A013613P1	Petfic_v00_mik.OX345639.1G636.1	Choren_v00_mik.OX359201.1G641.1	Osclob_v00_mik.OX382153.1G1027.1	4	3598136	3601445	1174	13	4877491	4880376	759	4	4065384	4066575	732	24	4494040	4496959	623	4	14971045	14974558	1367	10	2956360	2958498	515	a	0	0	0	0	0	0	no	#N/A	0
385	Hpan_g1761.t1	Adami_g11167.t2	PHAVENT1A012643P1	Petfic_v00_mik.OX345639.1G463.1	Choren_v00_mik.OX359201.1G714.1	Osclob_v00_mik.OX382153.1G449.1	4	1653612	1658380	509	13	5337064	5341056	847	4	3309417	3313820	555	24	4600860	4604948	644	4	15146587	15152061	1396	10	2959942	2963321	517	a	0	0	0	0	0	0	no	#N/A	0
386	Hpan_g1765.t1	Adami_g11147.t1	PHAVENT1A005131P1	Petfic_v00_mik.OX345639.1G651.1	Choren_v00_mik.OX359201.1G346.1	Osclob_v00_mik.OX382153.1G962.1	4	3419300	3420059	1096	13	2031262	2034699	426	4	4146109	4147013	765	24	4577335	4587724	640	4	14998992	15002658	1374	10	2990374	2991061	521	a	0	0	0	0	0	0	no	#N/A	0
387	Hpan_g1772.t1	Adami_g11157.t1	PHAVENT1A010164P1	Petfic_v00_mik.OX345639.1G621.1	Choren_v00_mik.OX359201.1G640.1	Osclob_v00_mik.OX382153.1G1014.1	4	3565832	3566348	1151	13	4871109	4872866	756	4	4068646	4069758	735	24	5092032	5093871	726	4	15044301	15046930	1384	10	3033477	3035427	530	a	0	0	0	0	0	0	no	#N/A	0
388	Hpan_g1818.t1	Adami_g10538.t1	PHAVENT1A000772P1	Petfic_v00_mik.OX345639.1G561.1	Choren_v00_mik.OX359201.1G607.1	Osclob_v00_mik.OX382153.1G611.1	4	2262208	2263133	701	13	4659778	4661503	713	4	3869341	3870627	670	24	2705031	2712743	374	4	8838018	8853033	687	10	3379508	3387002	584	a	0	0	0	0	0	0	no	#N/A	0
389	Hpan_g1844.t1	Adami_g11353.t1	PHAVENT1A023173P1	Petfic_v00_mik.OX345639.1G295.1	Choren_v00_mik.OX359201.1G799.1	Osclob_v00_mik.OX382153.1G644.1	4	2403121	2404253	739	13	5907653	5911584	949	4	1675902	1680574	352	24	1621009	1632528	297	4	16775627	17518086	1628	10	3714342	3733051	612	a	0	0	0	0	0	0	no	#N/A	0
390	Hpan_g1846.t1	Adami_g11346.t1	PHAVENT1A010488P1	Petfic_v00_mik.OX345639.1G305.1	Choren_v00_mik.OX359201.1G977.1	Osclob_v00_mik.OX382153.1G569.1	4	2104334	2104859	639	13	6726689	6727952	1156	4	1723133	1727002	362	24	1637578	1648128	299	4	16534528	16538429	1616	10	3749835	3752725	614	a	0	0	0	0	0	0	no	#N/A	0
391	Hpan_g1891.t1	Adami_g11583.t1	PHAVENT1A023504P1	Petfic_v00_mik.OX345639.1G59.1	Choren_v00_mik.OX359201.1G737.1	Osclob_v00_mik.OX382164.1G88.1	15	312598	317396	95	13	5492933	5499901	878	4	269467	273081	64	24	701117	708855	150	4	19830496	19836984	1923	10	4200799	4210124	666	0	0	0	0	0	0	0	no	#N/A	0
392	Hpan_g1990.t1	Adami_g11522.t1	PHAVENT1A010724P1	Petfic_v00_mik.OX345639.1G191.1	Choren_v00_mik.OX359201.1G991.1	Osclob_v00_mik.OX382153.1G564.1	4	2117964	2119803	643	13	6799560	6803550	1171	4	900302	909653	224	24	976128	987771	202	4	19480717	19492075	1837	10	5165704	5174172	785	a	0	0	0	0	0	0	no	#N/A	0
393	Hpan_g2080.t1	Adami_g11674.t1	PHAVENT1A021321P1	Petfic_v00_mik.OX345639.1G69.1	Choren_v00_mik.OX359201.1G893.1	Osclob_v00_mik.OX382153.1G624.1	4	2290083	2291802	713	13	6366965	6369363	1058	4	321141	323485	78	24	220560	224060	46	4	20421959	20426687	2031	10	5988859	5992336	897	a	0	0	0	0	0	0	no	#N/A	0
394	Hpan_g2083.t1	Adami_g11661.t1	PHAVENT1A014819P1	Petfic_v00_mik.OX345639.1G102.1	Choren_v00_mik.OX359201.1G606.1	Osclob_v00_mik.OX382153.1G54.1	4	190608	199982	62	13	4639789	4652005	710	4	489615	493905	120	24	289318	294872	63	4	20369932	20373910	2018	10	5998699	6020143	901	a	0	0	0	0	0	0	no	#N/A	0
395	Hpan_g2090.t1	Adami_g11656.t1	PHAVENT1A011279P1	Petfic_v00_mik.OX345639.1G110.1	Choren_v00_mik.OX359201.1G840.1	Osclob_v00_mik.OX382153.1G986.1	4	3475612	3477192	1121	13	6094602	6097885	994	4	562117	566851	142	24	310871	314379	68	4	20350678	20354197	2011	10	6029103	6030874	908	a	0	0	0	0	0	0	no	#N/A	0
396	Hpan_g2117.t1	Adami_g11687.t1	PHAVENT1A017552P1	Petfic_v00_mik.OX345639.1G103.1	Choren_v00_mik.OX359201.1G892.1	Osclob_v00_mik.OX382153.1G660.1	4	2445575	2446278	753	13	6363836	6364635	1056	4	498635	499968	123	24	97746	99135	9	4	20499813	20501648	2048	10	6237453	6238585	937	a	0	0	0	0	0	0	no	#N/A	0
397	Hpan_g2125.t1	Adami_g11677.t1	PHAVENT1A018658P1	Petfic_v00_mik.OX345639.1G68.1	Choren_v00_mik.OX359189.1G883.1	Osclob_v00_mik.OX382153.1G857.1	4	3041387	3044039	970	1	5732837	5738211	1039	4	316655	319123	77	24	209642	213523	42	4	20432982	20436299	2034	10	6424858	6426808	945	0	0	0	0	0	0	0	no	#N/A	0
398	Hpan_g2129.t1	Adami_g11681.t1	PHAVENT1A009142P1	Petfic_v00_mik.OX345639.1G72.1	Choren_v00_mik.OX359201.1G66.1	Osclob_v00_mik.OX382153.1G525.1	4	1925749	1926903	601	13	354475	355732	84	4	308149	309416	74	24	199908	201635	38	4	20465936	20467618	2038	10	6437124	6438562	949	a	0	0	0	0	0	0	no	#N/A	0
399	Hpan_g2131.t1	Adami_g11605.t1	PHAVENT1A012095P1	Petfic_v00_mik.OX345639.1G39.1	Choren_v00_mik.OX359201.1G152.1	Osclob_v00_mik.OX382153.1G605.1	4	2243259	2244677	693	13	746304	748460	185	4	219580	221058	42	24	191790	194324	34	4	19997102	20001319	1951	10	6442147	6444047	952	a	0	0	0	0	0	0	no	#N/A	0
400	Hpan_g2143.t1	Adami_g11593.t1	PHAVENT1A006311P1	Petfic_v00_mik.OX345636.1G4123.1	Choren_v00_mik.OX359196.1G700.1	Osclob_v00_mik.OX382158.1G130.1	9	428611	430416	151	8	5324274	5328370	839	1	33655337	33657742	4574	24	618846	622947	136	4	19950375	19953571	1939	10	6616730	6618755	964	0	0	0	0	0	0	0	no	#N/A	0
401	Hpan_g2153.t1	Adami_g11601.t1	PHAVENT1A001423P1	Petfic_v00_mik.OX345639.1G47.1	Choren_v00_mik.OX359201.1G146.1	Osclob_v00_mik.OX382153.1G638.1	4	2328879	2330988	727	13	657970	662125	166	4	256843	259065	55	24	571123	574495	120	4	19984137	19987103	1947	10	6667228	6670526	978	a	0	0	0	0	0	0	no	#N/A	0
402	Hpan_g2172.t1	Adami_g11631.t1	PHAVENT1A015173P1	Petfic_v00_mik.OX345639.1G76.1	Choren_v00_mik.OX359201.1G970.1	Osclob_v00_mik.OX382153.1G573.1	4	2125331	2126326	646	13	6685481	6686553	1142	4	342219	344269	83	24	410392	413200	98	4	20198879	20200111	1982	10	6720154	6721654	999	a	0	0	0	0	0	0	no	#N/A	0
403	Hpan_g2173.t1	Adami_g11632.t1	PHAVENT1A006171P1	Petfic_v00_mik.OX345639.1G75.1	Choren_v00_mik.OX359201.1G957.1	Osclob_v00_mik.OX382153.1G856.1	4	3035419	3036906	968	13	6675267	6676854	1138	4	339604	341933	82	24	413073	417947	99	4	20200608	20203369	1983	10	6721930	6723948	1000	a	0	0	0	0	0	0	no	#N/A	0
404	Hpan_g2176.t1	Adami_g11633.t1	PHAVENT1A001233P2	Petfic_v00_mik.OX345639.1G88.1	Choren_v00_mik.OX359201.1G941.1	Osclob_v00_mik.OX382153.1G850.1	4	3037031	3041336	969	13	6594998	6600186	1117	4	331028	339495	81	24	418004	425310	101	4	20204444	20213355	1984	10	6728325	6735879	1003	a	0	0	0	0	0	0	no	#N/A	0
405	Hpan_g2178.t1	Adami_g11628.t1	PHAVENT1A011710P1	Petfic_v00_mik.OX345639.1G97.1	Choren_v00_mik.OX359201.1G681.1	Osclob_v00_mik.OX382157.1G658.1	8	2689673	2692269	753	13	5084008	5095083	800	4	410143	427950	103	24	479841	491311	111	4	20164423	20173553	1979	10	6738336	6745034	1005	0	0	0	0	0	0	0	no	#N/A	0
406	Hpan_g2180.t1	Adami_g11637.t1	PHAVENT1A003034P1	Petfic_v00_mik.OX345639.1G227.1	Choren_v00_mik.OX359201.1G956.1	Osclob_v00_mik.OX382153.1G663.1	4	2452028	2455211	757	13	6673557	6675114	1137	4	1189304	1201661	275	24	430774	436862	105	4	20234458	20236548	1988	10	6756374	6759144	1008	a	0	0	0	0	0	0	no	#N/A	0
407	Hpan_g2184.t1	Adami_g11578.t1	PHAVENT1A004874P1	Petfic_v00_mik.OX345639.1G42.1	Choren_v00_mik.OX359190.1G1275.1	Osclob_v00_mik.OX382157.1G256.1	8	1040951	1041513	308	2	9172130	9173058	1486	4	225200	227727	45	24	730914	732533	154	4	19808252	19809569	1911	10	6767103	6767923	1012	f	0	0	0	0	0	0	no	#N/A	0
408	Hpan_g2185.t1	Adami_g11649.t1	PHAVENT1A013365P1	Petfic_v00_mik.OX345639.1G93.1	Choren_v00_mik.OX359201.1G93.1	Osclob_v00_mik.OX382153.1G561.1	4	2102255	2104240	638	13	451272	454144	107	4	385007	388537	96	24	351441	354123	78	4	20303706	20307379	2002	10	6768151	6770521	1013	a	0	0	0	0	0	0	no	#N/A	0
409	Hpan_g2201.t1	Adami_g11584.t1	PHAVENT1A021695P1	Petfic_v00_mik.OX345639.1G62.1	Choren_v00_mik.OX359201.1G20.1	Osclob_v00_mik.OX382169.1G290.1	20	1387531	1390905	359	13	85615	88058	22	4	278473	281142	66	24	694868	700199	149	4	19838519	19844214	1924	10	6858368	6861571	1033	0	0	0	0	0	0	0	no	#N/A	0
410	Hpan_g2224.t1	Adami_g11533.t1	PHAVENT1A012424P1	Petfic_v00_mik.OX345639.1G182.1	Choren_v00_mik.OX359201.1G838.1	Osclob_v00_mik.OX382153.1G661.1	4	2446358	2447678	754	13	6083425	6086116	991	4	839510	845955	216	24	1094512	1099262	231	4	19564001	19571819	1851	10	6982331	6986455	1061	a	0	0	0	0	0	0	no	#N/A	0
413	Hpan_g2251.t1	Adami_g4724.t1	PHAVENT1A007523P1	Petfic_v00_mik.OX345653.1G497.1	Choren_v00_mik.OX359190.1G576.1	Osclob_v00_mik.OX382165.1G512.1	16	2424078	2424936	633	2	3733594	3735496	694	18	4041027	4043949	592	17	2514659	2520094	248	12	6820617	6824544	863	11	87388	88277	31	0	0	0	0	0	0	0	no	#N/A	0
415	Hpan_g2322.t1	Adami_g4539.t1	PHAVENT1A005530P1	Petfic_v00_mik.OX345648.1G5.1	Choren_v00_mik.OX359190.1G515.1	Osclob_v00_mik.OX382161.1G573.1	12	2206353	2207075	639	2	3401278	3412641	626	13	50515	51325	6	17	3877986	3885178	325	12	4371665	4376086	631	11	436176	437320	112	f	0	0	0	0	0	0	no	#N/A	0
416	Hpan_g2326.t1	Adami_g4533.t1	PHAVENT1A014901P1	Petfic_v00_mik.OX345648.1G73.1	Choren_v00_mik.OX359190.1G167.1	Osclob_v00_mik.OX382161.1G406.1	12	1667684	1670096	466	2	847055	853396	207	13	357620	360947	87	17	6039839	6047218	550	12	4323396	4329696	625	11	452115	455843	116	f	0	0	0	0	0	0	no	#N/A	0
417	Hpan_g2337.t1	Adami_g4528.t1	PHAVENT1A005981P1	Petfic_v00_mik.OX345648.1G59.1	Choren_v00_mik.OX359190.1G259.1	Osclob_v00_mik.OX382161.1G633.1	12	2481543	2484248	734	2	1731500	1741715	323	13	238050	241699	56	17	5790527	5796342	522	12	4278769	4286743	618	11	503258	506926	129	f	0	0	0	0	0	0	no	#N/A	0
422	Hpan_g2428.t1	Adami_g4510.t1	PHAVENT1A007639P1	Petfic_v00_mik.OX345648.1G85.1	Choren_v00_mik.OX359198.1G218.1	Osclob_v00_mik.OX382161.1G549.1	12	2170875	2175828	624	10	1186446	1194378	266	13	371941	381699	92	17	6285374	6296654	590	12	4128099	4136910	593	11	1296414	1302693	235	f	0	0	0	0	0	0	no	#N/A	0
423	Hpan_g2429.t1	Adami_g4509.t1	PHAVENT1A013097P1	Petfic_v00_mik.OX345648.1G81.1	Choren_v00_mik.OX359197.1G995.1	Osclob_v00_mik.OX382161.1G472.1	12	1860727	1870835	526	9	7066448	7070035	1167	13	366650	368347	90	17	6279099	6285370	589	12	4124627	4127881	592	11	1302935	1305050	236	0	0	0	0	0	0	0	no	#N/A	0
424	Hpan_g2462.t1	Adami_g4492.t1	PHAVENT1A022218P1	Petfic_v00_mik.OX345648.1G105.1	Choren_v00_mik.OX359190.1G520.1	Osclob_v00_mik.OX382161.1G648.1	12	2475612	2477809	731	2	3432393	3441358	630	13	542463	546142	113	17	6532753	6537399	634	12	3974096	3979319	572	11	1453807	1456534	274	f	0	0	0	0	0	0	no	#N/A	0
425	Hpan_g2464.t1	Adami_g4497.t1	PHAVENT1A005397P1	Petfic_v00_mik.OX345648.1G107.1	Choren_v00_mik.OX359190.1G33.1	Osclob_v00_mik.OX382161.1G366.1	12	1569560	1569885	426	2	218305	219084	39	13	552237	552861	116	17	6522699	6524086	631	12	3993871	3995160	578	11	1466011	1466376	276	f	0	0	0	0	0	0	no	#N/A	0
427	Hpan_g2504.t1	Adami_g4776.t1	PHAVENT1A001533P1	Petfic_v00_mik.OX345648.1G199.1	Choren_v00_mik.OX359190.1G1394.1	Osclob_v00_mik.OX382161.1G700.1	12	2722238	2723738	805	2	9769838	9771814	1638	13	1208317	1210841	219	17	373447	375734	74	12	7344159	7347300	932	11	1762424	1763942	320	f	0	0	0	0	0	0	no	#N/A	0
428	Hpan_g2519.t1	Adami_g14818.t1	PHAVENT1A017379P1	Petfic_v00_mik.OX345648.1G122.1	Choren_v00_mik.OX359196.1G1241.1	Osclob_v00_mik.OX382165.1G395.1	16	2053193	2054307	484	8	7992655	7995302	1501	13	649913	651386	135	17	1304046	1313511	161	6	15559766	15566534	2017	11	1897083	1898549	336	0	0	0	0	0	0	0	no	#N/A	0
429	Hpan_g2548.t1	Adami_g4743.t1	PHAVENT1A019629P1	Petfic_v00_mik.OX345648.1G265.1	Choren_v00_mik.OX359190.1G1377.1	Osclob_v00_mik.OX382161.1G594.1	12	2319094	2320538	677	2	9730395	9733463	1622	13	1857823	1860539	297	17	140106	144132	35	12	7029486	7032580	890	11	2279988	2282154	376	f	0	0	0	0	0	0	no	#N/A	0
435	Hpan_g2983.t1	Adami_g2929.t1	PHAVENT1A003621P1	Petfic_v00_mik.OX345642.1G1006.1	Choren_v00_mik.OX359200.1G49.1	Osclob_v00_mik.OX382152.1G931.1	3	3367241	3374100	1091	12	145778	149462	49	7	7494744	7498968	1170	21	5065844	5072256	761	11	795065	801374	199	12	38541	44708	17	b	0	0	0	0	0	0	no	#N/A	0
436	Hpan_g2984.t1	Adami_g2930.t1	PHAVENT1A022372P1	Petfic_v00_mik.OX345642.1G1013.1	Choren_v00_mik.OX359196.1G770.1	Osclob_v00_mik.OX382150.1G166.1	1	535019	537829	200	8	5604193	5607324	917	7	7491371	7494695	1169	21	5049078	5054730	759	11	801489	808679	200	12	44855	47216	18	a	0	0	0	0	0	0	no	#N/A	0
437	Hpan_g2985.t1	Adami_g2875.t1	PHAVENT1A018234P1	Petfic_v00_mik.OX345642.1G615.1	Choren_v00_mik.OX359200.1G1106.1	Osclob_v00_mik.OX382152.1G957.1	3	3412289	3414802	1109	12	7466357	7469006	1271	7	4582351	4592725	705	21	5359523	5364613	849	11	525752	534375	137	12	47361	50788	19	b	0	0	0	0	0	0	no	#N/A	0
438	Hpan_g2995.t1	Adami_g2991.t1	PHAVENT1A000597P1	Petfic_v00_mik.OX345642.1G721.1	Choren_v00_mik.OX359200.1G363.1	Osclob_v00_mik.OX382152.1G893.1	3	3235460	3237653	1027	12	1718840	1719963	423	7	5864325	5865138	840	21	4387516	4388247	633	11	1259234	1259969	272	12	75768	76500	31	b	0	0	0	0	0	0	no	#N/A	0
439	Hpan_g3002.t1	Adami_g2861.t1	PHAVENT1A014563P1	Petfic_v00_mik.OX345642.1G382.1	Choren_v00_mik.OX359200.1G1087.1	Osclob_v00_mik.OX382152.1G847.1	3	3097687	3101076	979	12	7437444	7441343	1257	7	2408992	2417880	446	21	5176155	5182579	793	11	437677	443185	115	12	108463	112679	40	b	0	0	0	0	0	0	no	#N/A	0
440	Hpan_g3022.t1	Adami_g2793.t1	PHAVENT1A018494P1	Petfic_v00_mik.OX345642.1G879.1	Choren_v00_mik.OX359200.1G57.1	Osclob_v00_mik.OX382152.1G941.1	3	3353705	3354824	1083	12	194343	195898	59	7	6959337	6961200	1024	21	5845278	5846334	982	11	142248	143470	34	12	188450	189700	65	b	0	0	0	0	0	0	no	#N/A	0
441	Hpan_g3034.t1	Adami_g2819.t1	PHAVENT1A005242P1	Petfic_v00_mik.OX345642.1G489.1	Choren_v00_mik.OX359200.1G1044.1	Osclob_v00_mik.OX382152.1G553.1	3	2079998	2081572	642	12	7166998	7168672	1210	7	3456769	3462638	562	21	5293300	5296711	824	11	245666	247672	63	12	231395	233633	80	b	0	0	0	0	0	0	no	#N/A	0
442	Hpan_g3037.t1	Adami_g2915.t1	PHAVENT1A021578P1	Petfic_v00_mik.OX345642.1G989.1	Choren_v00_mik.OX359200.1G56.1	Osclob_v00_mik.OX382152.1G1015.1	3	3544765	3549936	1159	12	184245	187811	55	7	7460788	7464734	1155	21	5104560	5110521	775	11	734645	739235	185	12	240127	249882	84	b	0	0	0	0	0	0	no	#N/A	0
443	Hpan_g3040.t1	Adami_g2920.t1	PHAVENT1A012541P1	Petfic_v00_mik.OX345642.1G983.1	Choren_v00_mik.OX359200.1G48.1	Osclob_v00_mik.OX382156.1G515.1	7	2332699	2333419	607	12	143807	144332	47	7	7428203	7429136	1142	21	5092504	5094624	771	11	757453	758800	190	12	254388	255224	88	0	0	0	0	0	0	0	no	#N/A	0
444	Hpan_g3046.t1	Adami_g2912.t1	PHAVENT1A021263P1	Petfic_v00_mik.OX345642.1G857.1	Choren_v00_mik.OX359200.1G1104.1	Osclob_v00_mik.OX382152.1G526.1	3	2001144	2001950	613	12	7515855	7516996	1290	7	6827154	6830338	997	21	5127164	5132380	783	11	724004	727625	181	12	271651	273846	95	b	0	0	0	0	0	0	no	#N/A	0
445	Hpan_g3057.t1	Adami_g2808.t1	PHAVENT1A008079P1	Petfic_v00_mik.OX345642.1G988.1	Choren_v00_mik.OX359200.1G191.1	Osclob_v00_mik.OX382152.1G945.1	3	3383721	3385754	1096	12	814981	820917	221	7	7458717	7460561	1154	21	5820816	5823100	974	11	188767	193322	51	12	305768	308634	107	b	0	0	0	0	0	0	no	#N/A	0
447	Hpan_g3094.t1	Adami_g3486.t1	PHAVENT1A002866P1	Petfic_v00_mik.OX345636.1G2410.1	Choren_v00_mik.OX359200.1G1089.1	Osclob_v00_mik.OX382152.1G600.1	3	2221494	2223335	697	12	7454113	7455036	1263	1	22131291	22136433	2714	21	3777494	3779215	542	11	5944754	5949395	858	12	513698	514611	150	b	0	0	0	0	0	0	no	#N/A	0
448	Hpan_g3119.t1	Adami_g3532.t1	PHAVENT1A018239P1	Petfic_v00_mik.OX345642.1G1007.1	Choren_v00_mik.OX359200.1G367.1	Osclob_v00_mik.OX382152.1G746.1	3	2739122	2741124	868	12	1731109	1735950	426	7	7500246	7502768	1172	21	3560725	3569190	518	11	6773581	6829644	908	12	641064	644698	182	b	0	0	0	0	0	0	no	#N/A	0
449	Hpan_g3132.t1	Adami_g3008.t1	PHAVENT1A003615P2	Petfic_v00_mik.OX345642.1G817.1	Choren_v00_mik.OX359200.1G14.1	Osclob_v00_mik.OX382152.1G1046.1	3	3710320	3711484	1226	12	71298	72882	30	7	6618387	6622339	954	21	4251275	4253315	601	11	1476143	1479138	296	12	696381	698219	195	b	0	0	0	0	0	0	no	#N/A	0
450	Hpan_g3144.t1	Adami_g3003.t1	PHAVENT1A005440P1	Petfic_v00_mik.OX345642.1G637.1	Choren_v00_mik.OX359200.1G136.1	Osclob_v00_mik.OX382152.1G955.1	3	3404886	3406499	1105	12	537275	544176	157	7	5101742	5112347	747	21	4286439	4293385	608	11	1435861	1443087	288	12	814689	818953	209	b	0	0	0	0	0	0	no	#N/A	0
451	Hpan_g3149.t1	Adami_g2907.t1	PHAVENT1A009975P1	Petfic_v00_mik.OX345642.1G918.1	Choren_v00_mik.OX359200.1G36.1	Osclob_v00_mik.OX382152.1G765.1	3	2785063	2788803	882	12	138640	142314	44	7	7162312	7166793	1068	21	5516041	5522542	886	11	705620	710400	175	12	834252	847091	214	b	0	0	0	0	0	0	no	#N/A	0
452	Hpan_g3153.t1	Adami_g2906.t1	PHAVENT1A006261P1	Petfic_v00_mik.OX345642.1G934.1	Choren_v00_mik.OX359200.1G46.1	Osclob_v00_mik.OX382152.1G762.1	3	2788858	2790578	883	12	136788	138592	43	7	7185731	7189282	1074	21	5512039	5515857	885	11	701074	705473	174	12	870145	873658	219	b	0	0	0	0	0	0	no	#N/A	0
453	Hpan_g3154.t1	Adami_g2905.t1	PHAVENT1A002911P1	Petfic_v00_mik.OX345642.1G947.1	Choren_v00_mik.OX359200.1G37.1	Osclob_v00_mik.OX382152.1G1138.1	3	3964024	3964837	1319	12	142845	143665	46	7	7268707	7269523	1103	21	5510527	5511986	884	11	696819	698354	173	12	873871	875391	220	b	0	0	0	0	0	0	no	#N/A	0
454	Hpan_g3173.t1	Adami_g2933.t1	PHAVENT1A009876P1	Petfic_v00_mik.OX345642.1G992.1	Choren_v00_mik.OX359200.1G282.1	Osclob_v00_mik.OX382152.1G1009.1	3	3615445	3619426	1193	12	1279741	1287131	327	7	7474833	7476595	1162	21	5026678	5032359	755	11	817269	825358	203	12	944244	947985	239	b	0	0	0	0	0	0	no	#N/A	0
455	Hpan_g3192.t1	Adami_g2900.t1	PHAVENT1A007943P1	Petfic_v00_mik.OX345642.1G945.1	Choren_v00_mik.OX359200.1G93.1	Osclob_v00_mik.OX382152.1G873.1	3	3204906	3205735	1015	12	320880	322273	101	7	7265200	7266574	1101	21	5486622	5488763	877	11	677778	680642	168	12	1011778	1012521	262	b	0	0	0	0	0	0	no	#N/A	0
456	Hpan_g3260.t1	Adami_g2849.t1	PHAVENT1A003220P1	Petfic_v00_mik.OX345642.1G884.1	Choren_v00_mik.OX359200.1G32.1	Osclob_v00_mik.OX382152.1G1014.1	3	3540938	3543412	1158	12	123741	125455	37	7	6992083	6995150	1030	21	5685404	5687702	928	11	396856	399359	98	12	2020976	2023065	340	b	0	0	0	0	0	0	no	#N/A	0
457	Hpan_g3270.t1	Adami_g2797.t1	PHAVENT1A002182P1	Petfic_v00_mik.OX345649.1G626.1	Choren_v00_mik.OX359200.1G201.1	Osclob_v00_mik.OX382162.1G501.1	13	2125249	2126742	584	12	890980	895427	236	14	5137956	5139869	781	21	5652708	5655017	920	11	150537	152208	38	12	2149833	2152914	350	b	0	0	0	0	0	0	no	#N/A	0
459	Hpan_g3368.t1	Adami_g3158.t1	PHAVENT1A011144P1	Petfic_v00_mik.OX345642.1G253.1	Choren_v00_mik.OX359200.1G133.1	Osclob_v00_mik.OX382152.1G613.1	3	2246933	2249953	705	12	498782	503579	150	7	1478200	1485409	297	21	4113254	4120430	579	11	2893134	2903718	474	12	3050782	3056321	463	b	0	0	0	0	0	0	no	#N/A	0
460	Hpan_g3373.t1	Adami_g2769.t1	PHAVENT1A014213P1	Petfic_v00_mik.OX345642.1G878.1	Choren_v00_mik.OX359200.1G301.1	Osclob_v00_mik.OX382158.1G782.1	9	3283260	3284708	940	12	1383161	1385899	356	7	6949130	6952675	1021	21	5878493	5880553	992	11	48097	49764	7	12	3070445	3072295	469	0	0	0	0	0	0	0	no	#N/A	0
461	Hpan_g3374.t1	Adami_g2774.t1	PHAVENT1A006069P1	Petfic_v00_mik.OX345642.1G997.1	Choren_v00_mik.OX359200.1G423.1	Osclob_v00_mik.OX382152.1G1063.1	3	3721120	3722615	1233	12	2103699	2106570	492	7	7439366	7441005	1149	21	5755057	5757457	949	11	65760	68230	14	12	3072514	3074390	470	b	0	0	0	0	0	0	no	#N/A	0
462	Hpan_g3376.t1	Adami_g2776.t1	PHAVENT1A019669P1	Petfic_v00_mik.OX345642.1G998.1	Choren_v00_mik.OX359200.1G425.1	Osclob_v00_mik.OX382152.1G1068.1	3	3764281	3770151	1243	12	2108634	2139954	493	7	7442580	7449093	1150	21	5759751	5770566	951	11	70655	80140	16	12	3077101	3088969	472	b	0	0	0	0	0	0	no	#N/A	0
463	Hpan_g3382.t1	Adami_g2783.t1	PHAVENT1A020925P1	Petfic_v00_mik.OX345642.1G916.1	Choren_v00_mik.OX359200.1G547.1	Osclob_v00_mik.OX382159.1G164.1	10	589580	592567	190	12	3913868	3920825	624	7	7157722	7162061	1067	21	5790246	5795683	959	11	99461	105135	24	12	3133568	3146206	478	0	0	0	0	0	0	0	no	#N/A	0
464	Hpan_g3384.t1	Adami_g2785.t1	PHAVENT1A010018P1	Petfic_v00_mik.OX345642.1G885.1	Choren_v00_mik.OX359200.1G21.1	Osclob_v00_mik.OX382152.1G755.1	3	2744475	2747316	871	12	32731	34870	11	7	7011814	7016907	1033	21	5797423	5800324	963	11	107678	110408	26	12	3150451	3174824	480	b	0	0	0	0	0	0	no	#N/A	0
477	Hpan_g3822.t1	Adami_g1879.t1	PHAVENT1A006468P1	Petfic_v00_mik.OX345644.1G124.1	Choren_v00_mik.OX359196.1G527.1	Osclob_v00_mik.OX382153.1G813.1	4	2942733	2943520	936	8	4424679	4426000	630	9	535702	536993	138	7	5564941	5568109	558	1	21855228	21857400	2096	13	30857	31955	8	a	0	0	0	0	0	0	no	#N/A	0
478	Hpan_g3829.t1	Adami_g1895.t1	PHAVENT1A004952P1	Petfic_v00_mik.OX345644.1G132.1	Choren_v00_mik.OX359196.1G708.1	Osclob_v00_mik.OX382157.1G110.1	8	506907	507646	128	8	5365590	5366652	854	9	628728	630957	150	7	5249828	5253655	531	1	22001979	22004077	2119	13	53128	53860	18	0	0	0	0	0	0	0	no	#N/A	0
479	Hpan_g3830.t1	Adami_g1896.t1	PHAVENT1A007324P1	Petfic_v00_mik.OX345644.1G134.1	Choren_v00_mik.OX359196.1G320.1	Osclob_v00_mik.OX382153.1G373.1	4	1305197	1306310	420	8	2096209	2103400	388	9	631753	635834	151	7	5241504	5248298	530	1	22004561	22006922	2120	13	54121	54982	19	a	0	0	0	0	0	0	no	#N/A	0
481	Hpan_g3841.t1	Adami_g1794.t1	PHAVENT1A008247P1	Petfic_v00_mik.OX345644.1G210.1	Choren_v00_mik.OX359196.1G89.1	Osclob_v00_mik.OX382153.1G323.1	4	1125297	1125780	364	8	407929	408522	100	9	1000380	1002048	232	7	6220632	6222787	649	1	21153758	21155416	1998	13	94493	95108	33	a	0	0	0	0	0	0	no	#N/A	0
482	Hpan_g3842.t1	Adami_g1793.t1	PHAVENT1A016094P1	Petfic_v00_mik.OX345644.1G209.1	Choren_v00_mik.OX359196.1G140.1	Osclob_v00_mik.OX382157.1G639.1	8	2633931	2634775	736	8	817448	819381	165	9	1002364	1004707	233	7	6222869	6226773	650	1	21151661	21153468	1997	13	95483	96727	34	0	0	0	0	0	0	0	no	#N/A	0
483	Hpan_g3873.t1	Adami_g1787.t1	PHAVENT1A000275P1	Petfic_v00_mik.OX345644.1G200.1	Choren_v00_mik.OX359196.1G718.1	Osclob_v00_mik.OX382153.1G75.1	4	288944	291139	93	8	5411912	5414081	861	9	956181	957943	221	7	6153568	6155980	645	1	21123057	21124821	1990	13	222917	223861	70	a	0	0	0	0	0	0	no	#N/A	0
484	Hpan_g3878.t1	Adami_g1784.t1	PHAVENT1A016908P1	Petfic_v00_mik.OX345644.1G202.1	Choren_v00_mik.OX359196.1G16.1	Osclob_v00_mik.OX382153.1G68.1	4	256642	261708	83	8	106125	113811	14	9	989461	997830	230	7	6110904	6123296	637	1	21090624	21099542	1987	13	240356	246638	77	a	0	0	0	0	0	0	no	#N/A	0
485	Hpan_g3879.t1	Adami_g1839.t1	PHAVENT1A001770P1	Petfic_v00_mik.OX345644.1G188.1	Choren_v00_mik.OX359196.1G132.1	Osclob_v00_mik.OX382157.1G476.1	8	2006578	2007210	552	8	780691	782573	158	9	896400	897443	208	7	6108270	6110798	636	1	21507724	21508671	2049	13	246968	250002	78	0	0	0	0	0	0	0	no	#N/A	0
487	Hpan_g3909.t1	Adami_g1585.t1	PHAVENT1A017883P1	Petfic_v00_mik.OX345644.1G7.1	Choren_v00_mik.OX359196.1G202.1	Osclob_v00_mik.OX382153.1G711.1	4	2599461	2600292	807	8	1246925	1250372	241	9	47314	51779	11	7	4448393	4465807	463	1	18674964	18678731	1748	13	384921	386547	111	a	0	0	0	0	0	0	no	#N/A	0
488	Hpan_g3920.t1	Adami_g1824.t1	PHAVENT1A001992P1	Petfic_v00_mik.OX345644.1G13.1	Choren_v00_mik.OX359196.1G631.1	Osclob_v00_mik.OX382154.1G229.1	5	812583	813059	273	8	4969909	4970592	761	9	92896	93856	26	7	6525823	6530143	696	1	21399219	21401069	2034	13	425131	426027	123	0	0	0	0	0	0	0	no	#N/A	0
490	Hpan_g3967.t1	Adami_g1783.t1	PHAVENT1A002277P1	Petfic_v00_mik.OX345644.1G296.1	Choren_v00_mik.OX359196.1G95.1	Osclob_v00_mik.OX382153.1G287.1	4	1003820	1007471	333	8	443501	449715	106	9	1606950	1617747	342	7	6389271	6400445	672	1	21077635	21089496	1986	13	639851	643740	173	a	0	0	0	0	0	0	no	#N/A	0
491	Hpan_g3968.t1	Adami_g1782.t1	PHAVENT1A020699P1	Petfic_v00_mik.OX345644.1G298.1	Choren_v00_mik.OX359196.1G92.1	Osclob_v00_mik.OX382153.1G703.1	4	2604991	2608289	808	8	450129	456163	107	9	1598130	1606828	341	7	6400269	6409628	673	1	21069797	21077474	1985	13	644032	648617	174	a	0	0	0	0	0	0	no	#N/A	0
492	Hpan_g3972.t1	Adami_g1835.t1	PHAVENT1A018924P1	Petfic_v00_mik.OX345644.1G27.1	Choren_v00_mik.OX359196.1G644.1	Osclob_v00_mik.OX382153.1G797.1	4	2832700	2833237	904	8	5085209	5087438	788	9	60216	60892	14	7	6417447	6420176	677	1	21494541	21496468	2045	13	653001	653850	179	a	0	0	0	0	0	0	no	#N/A	0
493	Hpan_g3996.t1	Adami_g1946.t1	PHAVENT1A018904P1	Petfic_v00_mik.OX345644.1G79.1	Choren_v00_mik.OX359196.1G724.1	Osclob_v00_mik.OX382168.1G456.1	19	2045258	2049322	545	8	5475659	5481198	874	9	331170	341820	87	7	7599113	7607973	921	1	22406343	22417696	2179	13	741766	749355	206	0	0	0	0	0	0	0	no	#N/A	0
494	Hpan_g4005.t1	Adami_g1715.t1	PHAVENT1A004129P1	Petfic_v00_mik.OX345649.1G65.1	Choren_v00_mik.OX359196.1G263.1	Osclob_v00_mik.OX382153.1G374.1	4	1308431	1309140	423	8	1617649	1619418	314	14	300442	301417	76	7	6736394	6738398	745	1	20551298	20554271	1903	13	791970	793092	218	a	0	0	0	0	0	0	no	#N/A	0
495	Hpan_g4006.t1	Adami_g1716.t1	PHAVENT1A006059P1	Petfic_v00_mik.OX345649.1G66.1	Choren_v00_mik.OX359196.1G634.1	Osclob_v00_mik.OX382153.1G223.1	4	815413	817002	252	8	4979541	4982526	765	14	301702	303627	77	7	6731874	6735943	743	1	20554663	20559783	1905	13	793714	796269	219	a	0	0	0	0	0	0	no	#N/A	0
496	Hpan_g4011.t1	Adami_g1694.t1	PHAVENT1A003374P1	Petfic_v00_mik.OX345644.1G36.1	Choren_v00_mik.OX359196.1G753.1	Osclob_v00_mik.OX382153.1G252.1	4	907593	908464	289	8	5583506	5585204	908	9	130956	138545	41	7	6832642	6836871	766	1	20379099	20386258	1877	13	803649	806165	224	a	0	0	0	0	0	0	no	#N/A	0
499	Hpan_g4023.t1	Adami_g1961.t1	PHAVENT1A009282P1	Petfic_v00_mik.OX345644.1G55.1	Choren_v00_mik.OX359198.1G225.1	Osclob_v00_mik.OX382153.1G546.1	4	2022667	2026567	627	10	1220887	1228234	272	9	177376	180379	52	7	7706686	7710892	948	1	22491730	22498905	2195	13	842550	845719	238	0	0	0	0	0	0	0	no	#N/A	0
502	Hpan_g4066.t1	Adami_g1792.t1	PHAVENT1A022751P1	Petfic_v00_mik.OX345644.1G217.1	Choren_v00_mik.OX359196.1G76.1	Osclob_v00_mik.OX382153.1G904.1	4	3227766	3235970	1027	8	365305	370394	84	9	1005106	1013563	234	7	6227357	6237843	651	1	21142691	21150742	1996	13	1010615	1012887	286	a	0	0	0	0	0	0	no	#N/A	0
503	Hpan_g4069.t1	Adami_g1874.t1	PHAVENT1A002608P1	Petfic_v00_mik.OX345644.1G133.1	Choren_v00_mik.OX359196.1G742.1	Osclob_v00_mik.OX382153.1G296.1	4	1007487	1009198	334	8	5545693	5547967	894	9	643345	649599	153	7	5583931	5592633	563	1	21793185	21797800	2091	13	1033220	1035585	289	a	0	0	0	0	0	0	no	#N/A	0
504	Hpan_g4077.t1	Adami_g1863.t1	PHAVENT1A007641P1	Petfic_v00_mik.OX345644.1G177.1	Choren_v00_mik.OX359196.1G264.1	Osclob_v00_mik.OX382153.1G823.1	4	2943627	2945865	937	8	1623765	1630404	315	9	831530	837223	196	7	5918536	5926163	602	1	21703657	21709804	2077	13	1061156	1064209	299	a	0	0	0	0	0	0	no	#N/A	0
511	Hpan_g4183.t1	Adami_g1957.t1	PHAVENT1A017848P1	Petfic_v00_mik.OX345644.1G44.1	Choren_v00_mik.OX359196.1G760.1	Osclob_v00_mik.OX382153.1G80.1	4	317617	319900	102	8	5607341	5610153	918	9	204122	208198	59	7	7646586	7651396	931	1	22458481	22469401	2191	13	1479671	1482713	422	a	0	0	0	0	0	0	no	#N/A	0
512	Hpan_g4186.t1	Adami_g1954.t1	PHAVENT1A009371P1	Petfic_v00_mik.OX345644.1G57.1	Choren_v00_mik.OX359198.1G959.1	Osclob_v00_mik.OX382153.1G99.1	4	319922	321456	103	10	7110454	7111846	1151	9	197195	199316	56	7	7635748	7638006	927	1	22442932	22445816	2188	13	1489338	1491194	426	0	0	0	0	0	0	0	no	#N/A	0
513	Hpan_g4189.t1	Adami_g1950.t1	PHAVENT1A022359P1	Petfic_v00_mik.OX345644.1G72.1	Choren_v00_mik.OX359196.1G574.1	Osclob_v00_mik.OX382153.1G343.1	4	1262188	1263430	405	8	4726644	4729228	691	9	319421	327144	85	7	7615827	7626944	925	1	22427850	22438219	2184	13	1498098	1502777	429	a	0	0	0	0	0	0	no	#N/A	0
515	Hpan_g4270.t1	Adami_g1935.t1	PHAVENT1A019673P1	Petfic_v00_mik.OX345644.1G87.1	Choren_v00_mik.OX359196.1G685.1	Osclob_v00_mik.OX382159.1G312.1	10	1075980	1076604	358	8	5210401	5212603	820	9	372721	376782	97	7	7549438	7554150	909	1	22339751	22342270	2167	13	1990980	1992253	520	0	0	0	0	0	0	0	no	#N/A	0
516	Hpan_g4271.t1	Adami_g1942.t1	PHAVENT1A012474P1	Petfic_v00_mik.OX345644.1G81.1	Choren_v00_mik.OX359196.1G773.1	Osclob_v00_mik.OX382153.1G676.1	4	2447695	2448373	755	8	5622744	5623630	925	9	348644	349602	91	7	7514936	7521140	898	1	22395588	22397564	2175	13	1993113	1993849	521	a	0	0	0	0	0	0	no	#N/A	0
517	Hpan_g4280.t1	Adami_g1712.t1	PHAVENT1A000740P1	Petfic_v00_mik.OX345649.1G64.1	Choren_v00_mik.OX359196.1G150.1	Osclob_v00_mik.OX382153.1G387.1	4	1309340	1311241	424	8	904003	914506	182	14	285921	289798	73	7	6750225	6760833	749	1	20513018	20528530	1899	13	2022671	2029479	531	a	0	0	0	0	0	0	no	#N/A	0
518	Hpan_g4291.t1	Adami_g1969.t1	PHAVENT1A008529P1	Petfic_v00_mik.OX345640.1G188.1	Choren_v00_mik.OX359189.1G57.1	Osclob_v00_mik.OX382157.1G21.1	8	91011	92149	22	1	233662	235615	69	5	1211318	1213471	226	7	7739513	7741431	958	1	22554876	22557814	2208	13	2081901	2083620	542	0	0	0	0	0	0	0	no	#N/A	0
519	Hpan_g4302.t1	Adami_g1746.t1	PHAVENT1A019234P1	Petfic_v00_mik.OX345644.1G480.1	Choren_v00_mik.OX359196.1G273.1	Osclob_v00_mik.OX382153.1G202.1	4	752697	754567	239	8	1728551	1733311	328	9	2686469	2694021	557	7	6944016	6947728	790	1	20826693	20830560	1946	13	2123369	2129119	554	a	0	0	0	0	0	0	no	#N/A	0
520	Hpan_g4315.t1	Adami_g1633.t1	PHAVENT1A019461P1	Petfic_v00_mik.OX345644.1G241.1	Choren_v00_mik.OX359196.1G121.1	Osclob_v00_mik.OX382153.1G20.1	4	50659	54059	17	8	674307	681507	142	9	1118050	1124676	253	7	4717430	4784682	483	1	19313045	19346831	1805	13	2185589	2195669	569	a	0	0	0	0	0	0	no	#N/A	0
521	Hpan_g4320.t1	Adami_g1642.t1	PHAVENT1A019477P1	Petfic_v00_mik.OX345644.1G263.1	Choren_v00_mik.OX359196.1G261.1	Osclob_v00_mik.OX382153.1G812.1	4	2939710	2940051	934	8	1616233	1617268	313	9	1323133	1324460	299	7	7349697	7351296	868	1	19500431	19502480	1815	13	2230543	2231397	577	a	0	0	0	0	0	0	no	#N/A	0
522	Hpan_g4379.t1	Adami_g1756.t1	PHAVENT1A003320P1	Petfic_v00_mik.OX345644.1G387.1	Choren_v00_mik.OX359196.1G749.1	Osclob_v00_mik.OX382153.1G253.1	4	909779	910775	291	8	5577653	5578686	906	9	2145112	2149131	447	7	6869647	6871878	772	1	20907400	20910778	1958	13	2654837	2658315	640	a	0	0	0	0	0	0	no	#N/A	0
523	Hpan_g4395.t1	Adami_g1958.t1	PHAVENT1A000397P1	Petfic_v00_mik.OX345642.1G140.1	Choren_v00_mik.OX359196.1G173.1	Osclob_v00_mik.OX382153.1G98.1	4	316952	317563	101	8	1079447	1081210	206	7	638047	638718	164	7	7651787	7652940	932	1	22475235	22476675	2192	13	2731053	2733731	658	a	0	0	0	0	0	0	no	#N/A	0
524	Hpan_g4401.t1	Adami_g1963.t1	PHAVENT1A012744P1	Petfic_v00_mik.OX345644.1G48.1	Choren_v00_mik.OX359201.1G568.1	Osclob_v00_mik.OX382165.1G168.1	16	1094384	1095264	200	13	4388272	4389595	666	9	227946	228932	66	7	7721386	7722766	950	1	22509572	22511502	2199	13	2763034	2764618	665	0	0	0	0	0	0	0	no	#N/A	0
525	Hpan_g4476.t1	Adami_g1371.t1	PHAVENT1A000736P1	Petfic_v00_mik.OX345644.1G523.1	Choren_v00_mik.OX359196.1G556.1	Osclob_v00_mik.OX382152.1G686.1	3	2551867	2555236	805	8	4595276	4597706	666	9	3069192	3071614	619	7	2057327	2066385	287	1	16295179	16297369	1486	13	3467446	3469633	750	0	0	0	0	0	0	0	no	#N/A	0
526	Hpan_g4490.t1	Adami_g1459.t1	PHAVENT1A023235P1	Petfic_v00_mik.OX345644.1G1007.1	Choren_v00_mik.OX359196.1G4.1	Osclob_v00_mik.OX382150.1G465.1	1	1633318	1634990	555	8	57887	59580	8	9	6976052	6977683	1181	7	1042686	1051334	178	1	17479958	17489470	1589	13	3584528	3592415	767	a	0	0	0	0	0	0	no	#N/A	0
527	Hpan_g4498.t1	Adami_g1467.t1	PHAVENT1A006109P1	Petfic_v00_mik.OX345644.1G1009.1	Choren_v00_mik.OX359196.1G79.1	Osclob_v00_mik.OX382153.1G309.1	4	1046086	1047189	344	8	378116	380237	88	9	6953290	6954493	1174	7	967126	972400	167	1	17559882	17566861	1597	13	3643519	3647166	775	a	0	0	0	0	0	0	no	#N/A	0
528	Hpan_g4500.t1	Adami_g1473.t1	PHAVENT1A021010P1	Petfic_v00_mik.OX345644.1G951.1	Choren_v00_mik.OX359196.1G58.1	Osclob_v00_mik.OX382159.1G262.1	10	953240	956558	310	8	295033	297509	67	9	6765449	6768362	1108	7	938701	940219	161	1	17607529	17610005	1608	13	3654391	3655819	778	0	0	0	0	0	0	0	no	#N/A	0
530	Hpan_g4588.t1	Adami_g1272.t1	PHAVENT1A021214P1	Petfic_v00_mik.OX345644.1G870.1	Choren_v00_mik.OX359196.1G144.1	Osclob_v00_mik.OX382153.1G203.1	4	755853	758149	240	8	841559	848626	171	9	6259151	6265305	1017	7	3406577	3428433	392	1	14413228	14433973	1371	13	4182316	4191826	883	a	0	0	0	0	0	0	no	#N/A	0
531	Hpan_g4642.t1	Adami_g1402.t1	PHAVENT1A019302P1	Petfic_v00_mik.OX345644.1G985.1	Choren_v00_mik.OX359196.1G449.1	Osclob_v00_mik.OX382153.1G365.1	4	1265578	1269400	407	8	3943292	3963150	527	9	6866486	6874568	1145	7	1754559	1784712	256	1	16724738	16763759	1532	13	4465921	4479889	942	a	0	0	0	0	0	0	no	#N/A	0
533	Hpan_g4662.t1	Adami_g1427.t1	PHAVENT1A002366P1	Petfic_v00_mik.OX345644.1G998.1	Choren_v00_mik.OX359196.1G51.1	Osclob_v00_mik.OX382153.1G320.1	4	1085208	1087333	361	8	252778	254918	57	9	6901366	6906169	1160	7	1333558	1335876	212	1	16969852	16972551	1553	13	4592972	4595922	969	a	0	0	0	0	0	0	no	#N/A	0
534	Hpan_g4679.t1	Adami_g1356.t1	PHAVENT1A019463P1	Petfic_v00_mik.OX345644.1G969.1	Choren_v00_mik.OX359196.1G552.1	Osclob_v00_mik.OX382153.1G313.1	4	1074086	1074875	355	8	4588274	4595091	665	9	6851239	6852280	1131	7	2225764	2228689	300	1	16087395	16092062	1470	13	4731075	4732598	987	a	0	0	0	0	0	0	no	#N/A	0
535	Hpan_g4797.t1	Adami_g1511.t1	PHAVENT1A001108P1	Petfic_v00_mik.OX345644.1G707.1	Choren_v00_mik.OX359196.1G44.1	Osclob_v00_mik.OX382153.1G841.1	4	2996256	3000209	954	8	223418	230846	49	9	4454604	4474902	814	7	551090	561785	115	1	18070867	18079699	1656	13	6219736	6232645	1121	a	0	0	0	0	0	0	no	#N/A	0
536	Hpan_g4801.t1	Adami_g1525.t1	PHAVENT1A007028P1	Petfic_v00_mik.OX345644.1G748.1	Choren_v00_mik.OX359196.1G183.1	Osclob_v00_mik.OX382153.1G745.1	4	2720334	2724141	850	8	1132011	1138875	221	9	4973175	5007910	863	7	377241	385675	94	1	18171311	18178671	1673	13	6240209	6248174	1125	a	0	0	0	0	0	0	no	#N/A	0
537	Hpan_g4816.t1	Adami_g1564.t1	PHAVENT1A021362P1	Petfic_v00_mik.OX345644.1G11.1	Choren_v00_mik.OX359196.1G87.1	Osclob_v00_mik.OX382153.1G757.1	4	2745975	2746872	859	8	396944	397948	96	9	74206	75062	21	7	120200	121651	48	1	18458380	18461008	1719	13	6353024	6353883	1144	a	0	0	0	0	0	0	no	#N/A	0
538	Hpan_g4819.t1	Adami_g1535.t1	PHAVENT1A007424P1	Petfic_v00_mik.OX345644.1G692.1	Choren_v00_mik.OX359196.1G41.1	Osclob_v00_mik.OX382153.1G784.1	4	2810801	2812037	893	8	230951	232664	50	9	4358532	4362617	794	7	179930	181341	59	1	18247021	18247900	1685	13	6373562	6375400	1148	a	0	0	0	0	0	0	no	#N/A	0
539	Hpan_g4823.t1	Adami_g1532.t1	PHAVENT1A008072P1	Petfic_v00_mik.OX345644.1G438.1	Choren_v00_mik.OX359196.1G59.1	Osclob_v00_mik.OX382153.1G780.1	4	2807101	2808462	890	8	301395	303476	69	9	2471134	2478215	506	7	160672	164637	56	1	18218010	18222431	1681	13	6413181	6415441	1153	a	0	0	0	0	0	0	no	#N/A	0
540	Hpan_g4837.t1	Adami_g1553.t1	PHAVENT1A003239P1	Petfic_v00_mik.OX345644.1G1005.1	Choren_v00_mik.OX359196.1G7.1	Osclob_v00_mik.OX382158.1G200.1	9	654351	659994	243	8	78177	84133	13	9	6962871	6967425	1179	7	257462	270353	79	1	18363917	18375961	1703	13	6497972	6508213	1168	0	0	0	0	0	0	0	no	#N/A	0
541	Hpan_g4842.t1	Adami_g13605.t1	PHAVENT1A015275P1	Petfic_v00_mik.OX345639.1G1397.1	Choren_v00_mik.OX359202.1G865.1	Osclob_v00_mik.OX382162.1G96.1	13	240641	242565	105	14	6120293	6125281	1014	4	9473898	9475085	1656	15	91753	93758	4	6	3209104	3211406	524	13	6538232	6539138	1174	0	0	0	0	0	0	0	no	#N/A	0
542	Hpan_g4844.t1	Adami_g1572.t1	PHAVENT1A000653P1	Petfic_v00_mik.OX345644.1G29.1	Choren_v00_mik.OX359196.1G30.1	Osclob_v00_mik.OX382153.1G794.1	4	2865024	2867114	913	8	200318	202733	41	9	66945	68934	18	7	78188	80758	38	1	18519333	18523302	1727	13	6545937	6549414	1177	a	0	0	0	0	0	0	no	#N/A	0
544	Hpan_g4870.t1	Adami_g4085.t1	PHAVENT1A020364P1	Petfic_v00_mik.OX345650.1G693.1	Choren_v00_mik.OX359199.1G553.1	Osclob_v00_mik.OX382162.1G1.1	13	1668	2500	1	11	4245795	4247880	658	15	5135262	5137217	828	19	196538	198924	49	12	266039	269375	56	14	75566	76557	26	b	0	0	0	0	0	0	no	#N/A	0
545	Hpan_g4874.t1	Adami_g4080.t1	PHAVENT1A019026P1	Petfic_v00_mik.OX345650.1G640.1	Choren_v00_mik.OX359199.1G373.1	Osclob_v00_mik.OX382162.1G581.1	13	2352380	2357030	684	11	2316222	2322318	466	15	4843097	4849690	759	19	217384	220999	59	12	249707	254063	51	14	80449	83172	30	b	0	0	0	0	0	0	no	#N/A	0
546	Hpan_g4875.t1	Adami_g4079.t1	PHAVENT1A009627P1	Petfic_v00_mik.OX345650.1G636.1	Choren_v00_mik.OX359199.1G371.1	Osclob_v00_mik.OX382162.1G584.1	13	2351731	2352243	683	11	2322583	2324532	467	15	4849719	4863391	761	19	214794	217129	58	12	248259	249379	50	14	83590	84201	31	b	0	0	0	0	0	0	no	#N/A	0
547	Hpan_g4876.t1	Adami_g4078.t1	PHAVENT1A016956P1	Petfic_v00_mik.OX345650.1G661.1	Choren_v00_mik.OX359199.1G668.1	Osclob_v00_mik.OX382162.1G561.1	13	2336189	2338004	676	11	5046389	5055441	802	15	5000578	5004537	796	19	87631	94755	29	12	242295	247588	49	14	84365	86451	32	b	0	0	0	0	0	0	no	#N/A	0
548	Hpan_g4889.t1	Adami_g4285.t1	PHAVENT1A022983P1	Petfic_v00_mik.OX345650.1G724.1	Choren_v00_mik.OX359199.1G610.1	Osclob_v00_mik.OX382162.1G544.1	13	2229087	2231046	635	11	4611680	4615639	728	15	5275809	5277946	852	19	3731751	3748459	420	12	2054662	2059956	313	14	118187	121101	46	b	0	0	0	0	0	0	no	#N/A	0
549	Hpan_g4904.t1	Adami_g4138.t1	PHAVENT1A009150P1	Petfic_v00_mik.OX345650.1G697.1	Choren_v00_mik.OX359199.1G692.1	Osclob_v00_mik.OX382162.1G516.1	13	2178602	2179098	613	11	5137852	5140579	825	15	5154132	5156093	833	19	354637	357306	93	12	681457	683539	124	14	187593	188236	62	b	0	0	0	0	0	0	no	#N/A	0
550	Hpan_g4917.t1	Adami_g7401.t1	PHAVENT1A021870P1	Petfic_v00_mik.OX345641.1G165.1	Choren_v00_mik.OX359195.1G1118.1	Osclob_v00_mik.OX382167.1G354.1	18	1148789	1152614	391	7	7673701	7676557	1297	6	984423	990399	202	5	32596	36828	15	2	9216166	9237546	1112	14	238128	242105	76	g	0	0	0	0	0	0	no	#N/A	0
554	Hpan_g4998.t1	Adami_g4252.t1	PHAVENT1A021829P1	Petfic_v00_mik.OX345650.1G588.1	Choren_v00_mik.OX359199.1G578.1	Osclob_v00_mik.OX382153.1G626.1	4	2296723	2297746	716	11	4415511	4417057	689	15	4391684	4393506	695	19	4372966	4375875	488	12	1773008	1774486	274	14	1217882	1219627	170	0	0	0	0	0	0	0	no	#N/A	0
555	Hpan_g4999.t1	Adami_g4253.t1	PHAVENT1A008322P1	Petfic_v00_mik.OX345650.1G583.1	Choren_v00_mik.OX359199.1G716.1	Osclob_v00_mik.OX382162.1G610.1	13	2467246	2468992	719	11	5272566	5273810	861	15	4389266	4391575	694	19	4366357	4374923	487	12	1774731	1776974	275	14	1220072	1222832	171	b	0	0	0	0	0	0	no	#N/A	0
556	Hpan_g5055.t1	Adami_g4220.t1	PHAVENT1A002596P1	Petfic_v00_mik.OX345650.1G610.1	Choren_v00_mik.OX359192.1G1371.1	Osclob_v00_mik.OX382152.1G742.1	3	2722234	2726307	862	4	8785060	8791831	1634	15	4609306	4617357	723	19	1367258	1380068	245	12	1384643	1392886	231	14	1961561	1969345	236	0	0	0	0	0	0	0	no	#N/A	0
558	Hpan_g5071.t1	Adami_g4211.t1	PHAVENT1A020939P2	Petfic_v00_mik.OX345650.1G732.1	Choren_v00_mik.OX359199.1G217.1	Osclob_v00_mik.OX382162.1G570.1	13	2303292	2306169	664	11	1112360	1119982	266	15	5335762	5338609	870	19	934431	942396	188	12	1269609	1282290	219	14	2027219	2048189	253	b	0	0	0	0	0	0	no	#N/A	0
562	Hpan_g5183.t1	Adami_g4129.t1	PHAVENT1A007344P1	Petfic_v00_mik.OX345650.1G562.1	Choren_v00_mik.OX359199.1G330.1	Osclob_v00_mik.OX382162.1G165.1	13	535332	536531	176	11	2080757	2086796	415	15	4116542	4125498	664	19	404538	406808	102	12	628574	631155	114	14	3020561	3023276	381	b	0	0	0	0	0	0	no	#N/A	0
565	Hpan_g5231.t1	Adami_g4981.t1	PHAVENT1A002002P1	Petfic_v00_mik.OX345650.1G570.1	Choren_v00_mik.OX359199.1G593.1	Osclob_v00_mik.OX382162.1G532.1	13	2177333	2178539	612	11	4578659	4580389	721	15	4192341	4195672	672	19	4042254	4049842	454	12	10803236	10812953	1161	14	3412138	3415451	434	b	0	0	0	0	0	0	no	#N/A	0
566	Hpan_g5237.t1	Adami_g4201.t1	PHAVENT1A000858P1	Petfic_v00_mik.OX345650.1G748.1	Choren_v00_mik.OX359199.1G113.1	Osclob_v00_mik.OX382162.1G612.1	13	2492913	2493825	731	11	529445	533094	135	15	5392071	5393995	888	19	1320984	1326089	240	12	1192518	1197955	208	14	3489631	3495808	441	b	0	0	0	0	0	0	no	#N/A	0
567	Hpan_g5258.t1	Adami_g4187.t1	PHAVENT1A002174P1	Petfic_v00_mik.OX345650.1G755.1	Choren_v00_mik.OX359199.1G7.1	Osclob_v00_mik.OX382157.1G765.1	8	3091661	3095518	874	11	39879	44288	10	15	5405247	5409228	892	19	1276996	1295491	232	12	1082043	1089100	190	14	3641297	3656523	467	0	0	0	0	0	0	0	no	#N/A	0
570	Hpan_g5350.t1	Adami_g587.t1	PHAVENT1A015736P1	Petfic_v00_mik.OX345645.1G347.1	Choren_v00_mik.OX359192.1G763.1	Osclob_v00_mik.OX382159.1G216.1	10	722042	723850	244	4	5834185	5836366	922	10	1992245	1994911	408	22	960097	962401	169	1	4988344	4991013	555	14	4605368	4609519	574	d	0	0	0	0	0	0	no	#N/A	0
571	Hpan_g5362.t1	Adami_g4346.t1	PHAVENT1A018363P1	Petfic_v00_mik.OX345650.1G786.1	Choren_v00_mik.OX359199.1G677.1	Osclob_v00_mik.OX382168.1G339.1	19	1557549	1557986	403	11	5088521	5089874	811	15	5515523	5516172	932	19	4924103	4926803	555	12	2548154	2549565	384	14	4760785	4764107	589	0	0	0	0	0	0	0	no	#N/A	0
574	Hpan_g5544.t1	Adami_g4404.t1	PHAVENT1A020509P1	Petfic_v00_mik.OX345650.1G508.1	Choren_v00_mik.OX359199.1G497.1	Osclob_v00_mik.OX382162.1G522.1	13	2226541	2229039	634	11	3820312	3827236	596	15	3733373	3743500	603	19	5545188	5553651	642	12	3200769	3206304	459	14	6201606	6208067	793	b	0	0	0	0	0	0	no	#N/A	0
575	Hpan_g5549.t1	Adami_g4435.t1	PHAVENT1A007539P1	Petfic_v00_mik.OX345650.1G360.1	Choren_v00_mik.OX359199.1G684.1	Osclob_v00_mik.OX382162.1G61.1	13	147371	149307	66	11	5124018	5126278	820	15	2366324	2368832	430	19	5847771	5852519	700	12	3471249	3474099	496	14	6232809	6236700	798	b	0	0	0	0	0	0	no	#N/A	0
576	Hpan_g5552.t1	Adami_g4432.t1	PHAVENT1A005066P1	Petfic_v00_mik.OX345650.1G452.1	Choren_v00_mik.OX359199.1G17.1	Osclob_v00_mik.OX382157.1G451.1	8	1954198	1956073	532	11	88325	89368	21	15	3266559	3269503	543	19	5721166	5723498	675	12	3455086	3456519	493	14	6244724	6246276	802	0	0	0	0	0	0	0	no	#N/A	0
577	Hpan_g5605.t1	Adami_g4461.t1	PHAVENT1A022687P1	Petfic_v00_mik.OX345650.1G151.1	Choren_v00_mik.OX359198.1G10.1	Osclob_v00_mik.OX382169.1G449.1	20	2074126	2077149	540	10	32832	36007	10	15	718279	729752	185	19	5924574	5930323	714	12	3775276	3783104	532	14	6470583	6475798	860	f	0	0	0	0	0	0	no	#N/A	0
578	Hpan_g5609.t1	Adami_g4474.t1	PHAVENT1A000664P1	Petfic_v00_mik.OX345652.1G545.1	Choren_v00_mik.OX359201.1G846.1	Osclob_v00_mik.OX382166.1G106.1	NA	292029	293630	113	13	6113116	6115793	1001	17	4590011	4592324	646	19	6015994	6018468	736	12	3848852	3851208	552	14	6481198	6482768	865	0	0	0	0	0	0	0	no	#N/A	0
579	Hpan_g5613.t1	Adami_g4481.t1	PHAVENT1A018595P1	Petfic_v00_mik.OX345642.1G850.1	Choren_v00_mik.OX359199.1G35.1	Osclob_v00_mik.OX382156.1G879.1	7	3367629	3370432	1028	11	142828	144428	40	7	6809574	6811268	989	19	5983566	5988792	728	12	3890201	3892568	559	14	6494559	6495561	870	0	0	0	0	0	0	0	no	#N/A	0
580	Hpan_g5614.t1	Adami_g4483.t1	PHAVENT1A011809P1	Petfic_v00_mik.OX345650.1G407.1	Choren_v00_mik.OX359199.1G31.1	Osclob_v00_mik.OX382152.1G300.1	3	942820	943627	340	11	128940	130296	35	15	2924964	2925842	486	19	5982866	5983863	727	12	3895733	3897085	561	14	6495699	6496213	871	b	0	0	0	0	0	0	no	#N/A	0
581	Hpan_g5622.t1	Adami_g13436.t1	PHAVENT1A016130P1	Petfic_v00_mik.OX345639.1G860.1	Choren_v00_mik.OX359202.1G165.1	Osclob_v00_mik.OX382156.1G479.1	7	2155010	2156211	554	14	667881	670037	192	4	5145973	5148490	1014	15	5583115	5585983	774	6	1544956	1546991	323	15	3294	4830	3	e	0	0	0	0	0	0	no	#N/A	0
582	Hpan_g5642.t1	Adami_g13237.t1	PHAVENT1A021772P1	Petfic_v00_mik.OX345639.1G670.1	Choren_v00_mik.OX359202.1G867.1	Osclob_v00_mik.OX382150.1G753.1	1	2522356	2523497	892	14	6168557	6171499	1016	4	4288454	4290764	807	15	6587384	6589889	982	6	315484	317658	65	15	73907	76326	27	0	0	0	0	0	0	0	no	#N/A	0
583	Hpan_g5645.t1	Adami_g13356.t1	PHAVENT1A013070P1	Petfic_v00_mik.OX345639.1G1070.1	Choren_v00_mik.OX359202.1G98.1	Osclob_v00_mik.OX382156.1G915.1	7	3424995	3425721	1054	14	448341	449494	115	4	6739262	6741396	1255	15	6093752	6095141	873	6	1098337	1099988	220	15	83521	84577	30	e	0	0	0	0	0	0	no	#N/A	0
584	Hpan_g5647.t1	Adami_g13358.t1	PHAVENT1A002881P1	Petfic_v00_mik.OX345639.1G1071.1	Choren_v00_mik.OX359202.1G108.1	Osclob_v00_mik.OX382153.1G266.1	4	908915	909700	290	14	469910	471271	123	4	6742300	6743919	1257	15	6092364	6093060	871	6	1100959	1101826	222	15	85119	85741	32	0	0	0	0	0	0	0	no	#N/A	0
585	Hpan_g5654.t1	Adami_g13366.t1	PHAVENT1A009078P1	Petfic_v00_mik.OX345639.1G697.1	Choren_v00_mik.OX359202.1G930.1	Osclob_v00_mik.OX382156.1G201.1	7	738822	739871	237	14	6383272	6384581	1087	4	4355510	4356829	825	15	6076050	6079880	865	6	1155207	1158843	230	15	115055	116980	39	e	0	0	0	0	0	0	no	#N/A	0
587	Hpan_g5683.t1	Adami_g13416.t1	PHAVENT1A019138P1	Petfic_v00_mik.OX345639.1G855.1	Choren_v00_mik.OX359202.1G477.1	Osclob_v00_mik.OX382156.1G363.1	7	1725295	1726122	418	14	2604322	2608122	570	4	5054460	5056124	1001	15	5760169	5763522	803	6	1402449	1403518	294	15	188535	189379	73	e	0	0	0	0	0	0	no	#N/A	0
588	Hpan_g5688.t1	Adami_g13411.t1	PHAVENT1A003273P1	Petfic_v00_mik.OX345639.1G873.1	Choren_v00_mik.OX359202.1G877.1	Osclob_v00_mik.OX382156.1G901.1	7	3395009	3395701	1038	14	6207400	6208959	1026	4	5199213	5201476	1029	15	5815310	5818454	816	6	1344272	1346513	287	15	211265	212070	80	e	0	0	0	0	0	0	no	#N/A	0
589	Hpan_g5690.t1	Adami_g13404.t1	PHAVENT1A007694P1	Petfic_v00_mik.OX345639.1G875.1	Choren_v00_mik.OX359202.1G895.1	Osclob_v00_mik.OX382156.1G36.1	7	204736	205278	44	14	6258126	6258629	1043	4	5220523	5221761	1032	15	5836399	5841455	822	6	1314412	1315031	278	15	215346	215875	82	e	0	0	0	0	0	0	no	#N/A	0
590	Hpan_g5691.t1	Adami_g13424.t1	PHAVENT1A006105P1	Petfic_v00_mik.OX345639.1G850.1	Choren_v00_mik.OX359202.1G730.1	Osclob_v00_mik.OX382156.1G916.1	7	3426907	3427972	1056	14	5230906	5234356	854	4	5048520	5050964	999	15	5764612	5767118	805	6	1433392	1436297	305	15	216007	217130	83	e	0	0	0	0	0	0	no	#N/A	0
591	Hpan_g5733.t1	Adami_g13562.t1	PHAVENT1A019667P1	Petfic_v00_mik.OX345639.1G1001.3	Choren_v00_mik.OX359202.1G58.1	Osclob_v00_mik.OX382156.1G869.1	7	3303229	3303960	1001	14	253533	254739	62	4	6078508	6083125	1170	15	4441921	4444245	597	6	2560035	2564213	472	15	332162	333184	133	e	0	0	0	0	0	0	no	#N/A	0
592	Hpan_g5737.t1	Adami_g13197.t1	PHAVENT1A021153P1	Petfic_v00_mik.OX345639.1G825.1	Choren_v00_mik.OX359202.1G897.1	Osclob_v00_mik.OX382156.1G15.1	7	137903	143099	19	14	6275516	6277702	1048	4	4956610	4958945	972	15	6882676	6883950	1066	6	157767	159669	19	15	345088	346876	137	e	0	0	0	0	0	0	no	#N/A	0
593	Hpan_g5738.t1	Adami_g13195.t1	PHAVENT1A015304P1	Petfic_v00_mik.OX345639.1G799.1	Choren_v00_mik.OX359202.1G788.1	Osclob_v00_mik.OX382156.1G892.1	7	3360066	3363381	1024	14	5599248	5611337	922	4	4843626	4850002	940	15	6885469	6889137	1067	6	149659	156090	16	15	348616	354897	138	e	0	0	0	0	0	0	no	#N/A	0
594	Hpan_g5742.t1	Adami_g13191.t1	PHAVENT1A022618P1	Petfic_v00_mik.OX345639.1G826.1	Choren_v00_mik.OX359202.1G932.1	Osclob_v00_mik.OX382156.1G489.1	7	2188587	2189752	572	14	6387682	6389257	1090	4	4966734	4969969	974	15	6895356	6896785	1071	6	137883	140150	11	15	362363	363843	144	e	0	0	0	0	0	0	no	#N/A	0
595	Hpan_g5745.t1	Adami_g13185.t1	PHAVENT1A016167P1	Petfic_v00_mik.OX345639.1G836.1	Choren_v00_mik.OX359200.1G366.1	Osclob_v00_mik.OX382151.1G1098.1	2	4026257	4028182	1270	12	1724751	1730982	425	4	4996121	5001412	986	15	6910237	6913654	1078	6	99319	112440	5	15	368986	371616	147	0	0	0	0	0	0	0	no	#N/A	0
596	Hpan_g5746.t1	Adami_g13355.t1	PHAVENT1A008035P1	Petfic_v00_mik.OX345639.1G1069.1	Choren_v00_mik.OX359202.1G109.1	Osclob_v00_mik.OX382168.1G402.1	19	1821317	1833631	483	14	471756	473964	124	4	6736624	6738874	1254	15	6095368	6097671	874	6	1095950	1098218	219	15	371883	374184	148	0	0	0	0	0	0	0	no	#N/A	0
598	Hpan_g5765.t1	Adami_g13966.t1	PHAVENT1A004043P1	Petfic_v00_mik.OX345639.1G1502.1	Choren_v00_mik.OX359202.1G34.1	Osclob_v00_mik.OX382156.1G73.1	7	293006	294317	85	14	156303	157837	45	4	9842172	9843411	1781	15	2831189	2923611	508	6	6067475	6071917	993	15	537124	539495	172	e	0	0	0	0	0	0	no	#N/A	0
599	Hpan_g5793.t1	Adami_g13202.t1	PHAVENT1A010712P1	Petfic_v00_mik.OX345639.1G804.1	Choren_v00_mik.OX359202.1G230.1	Osclob_v00_mik.OX382156.1G691.1	7	2787894	2791127	794	14	952562	957852	266	4	4879150	4886349	949	15	6857059	6861080	1054	6	180555	190189	25	15	614294	619184	206	e	0	0	0	0	0	0	no	#N/A	0
600	Hpan_g5796.t1	Adami_g13251.t1	PHAVENT1A003846P1	Petfic_v00_mik.OX345639.1G662.1	Choren_v00_mik.OX359202.1G229.1	Osclob_v00_mik.OX382157.1G684.1	8	2787937	2795904	783	14	941355	952203	265	4	4223656	4233218	787	15	6511089	6523877	964	6	403373	422336	80	15	629074	641858	209	0	0	0	0	0	0	0	no	#N/A	0
601	Hpan_g5798.t1	Adami_g13250.t1	PHAVENT1A013107P1	Petfic_v00_mik.OX345639.1G713.1	Choren_v00_mik.OX359202.1G869.1	Osclob_v00_mik.OX382156.1G478.1	7	2150585	2154835	553	14	6172727	6179230	1017	4	4406846	4414933	843	15	6494464	6504311	962	6	394487	402647	79	15	644325	650696	211	e	0	0	0	0	0	0	no	#N/A	0
602	Hpan_g5799.t1	Adami_g13249.t1	PHAVENT1A006463P1	Petfic_v00_mik.OX345639.1G712.1	Choren_v00_mik.OX359202.1G379.1	Osclob_v00_mik.OX382156.1G694.1	7	2795741	2797661	798	14	1871338	1876344	445	4	4402102	4406346	842	15	6490840	6493865	961	6	386840	393811	78	15	651391	653493	212	e	0	0	0	0	0	0	no	#N/A	0
603	Hpan_g5802.t1	Adami_g13256.t1	PHAVENT1A013712P1	Petfic_v00_mik.OX345639.1G677.1	Choren_v00_mik.OX359202.1G217.1	Osclob_v00_mik.OX382156.1G562.1	7	2423030	2423314	647	14	887706	887998	255	4	4215717	4216056	783	15	6535190	6535558	968	6	448469	449273	87	15	654552	654824	215	e	0	0	0	0	0	0	no	#N/A	0
604	Hpan_g5808.t1	Adami_g13351.t1	PHAVENT1A015469P1	Petfic_v00_mik.OX345639.1G1066.1	Choren_v00_mik.OX359202.1G99.1	Osclob_v00_mik.OX382156.1G909.1	7	3423090	3424992	1053	14	451314	454582	117	4	6688626	6694631	1248	15	6110717	6113432	879	6	1082355	1085293	214	15	667595	670196	222	e	0	0	0	0	0	0	no	#N/A	0
605	Hpan_g5811.t1	Adami_g13342.t1	PHAVENT1A013606P1	Petfic_v00_mik.OX345639.1G845.1	Choren_v00_mik.OX359202.1G882.1	Osclob_v00_mik.OX382156.1G812.1	7	3178812	3182043	951	14	6216843	6222279	1031	4	5023304	5030874	993	15	6146477	6152511	892	6	1040451	1047073	204	15	673370	676510	225	e	0	0	0	0	0	0	no	#N/A	0
606	Hpan_g5833.t1	Adami_g13559.t1	PHAVENT1A000976P1	Petfic_v00_mik.OX345639.1G1063.1	Choren_v00_mik.OX359202.1G57.1	Osclob_v00_mik.OX382162.1G560.1	13	2324750	2325455	672	14	249529	251526	60	4	6671302	6674333	1244	15	4501635	4508999	607	6	2549312	2553563	469	15	826528	827642	250	0	0	0	0	0	0	0	no	#N/A	0
607	Hpan_g5846.t1	Adami_g13597.t1	PHAVENT1A007029P1	Petfic_v00_mik.OX345639.1G343.1	Choren_v00_mik.OX359202.1G940.1	Osclob_v00_mik.OX382156.1G684.1	7	2780645	2782790	791	14	6425358	6427999	1104	4	2031174	2036993	415	15	3002307	3023409	522	6	3154365	3161239	515	15	916735	920025	266	e	0	0	0	0	0	0	no	#N/A	0
608	Hpan_g5884.t1	Adami_g13458.t1	PHAVENT1A020799P2	Petfic_v00_mik.OX345639.1G963.1	Choren_v00_mik.OX359202.1G687.1	Osclob_v00_mik.OX382153.1G102.1	4	338486	342135	111	14	5018029	5030990	808	4	5746997	5756964	1132	15	5488944	5496703	751	6	1637461	1644625	346	15	1219113	1225993	307	0	0	0	0	0	0	0	no	#N/A	0
609	Hpan_g5885.t1	Adami_g13449.t1	PHAVENT1A012217P1	Petfic_v00_mik.OX345639.1G880.1	Choren_v00_mik.OX359202.1G699.1	Osclob_v00_mik.OX382156.1G417.1	7	1889031	1891201	471	14	5090434	5092110	829	4	5295393	5297859	1047	15	5552841	5555121	763	6	1592633	1595847	336	15	1226430	1228574	308	e	0	0	0	0	0	0	no	#N/A	0
610	Hpan_g5896.t1	Adami_g13326.t1	PHAVENT1A018999P1	Petfic_v00_mik.OX345639.1G690.1	Choren_v00_mik.OX359202.1G11.1	Osclob_v00_mik.OX382156.1G644.1	7	2673532	2674839	745	14	51732	52830	13	4	4305125	4306463	811	15	6253979	6256078	912	6	851644	852879	180	15	1381160	1382545	320	e	0	0	0	0	0	0	no	#N/A	0
611	Hpan_g5897.t1	Adami_g13325.t1	PHAVENT1A015865P1	Petfic_v00_mik.OX345639.1G671.1	Choren_v00_mik.OX359202.1G5.1	Osclob_v00_mik.OX382156.1G348.1	7	1693995	1697543	403	14	40969	51516	12	4	4294641	4304369	810	15	6237262	6253859	911	6	833327	850025	179	15	1383267	1397302	321	e	0	0	0	0	0	0	no	#N/A	0
612	Hpan_g5923.t1	Adami_g13481.t1	PHAVENT1A000320P1	Petfic_v00_mik.OX345639.1G945.1	Choren_v00_mik.OX359202.1G298.1	Osclob_v00_mik.OX382156.1G509.1	7	2249023	2249473	587	14	1385500	1387884	351	4	5631929	5632674	1107	15	5359709	5360372	721	6	1791341	1792414	373	15	1541807	1543955	355	e	0	0	0	0	0	0	no	#N/A	0
613	Hpan_g5925.t1	Adami_g13482.t1	PHAVENT1A018501P1	Petfic_v00_mik.OX345639.1G939.1	Choren_v00_mik.OX359202.1G697.1	Osclob_v00_mik.OX382156.1G85.1	7	327631	328684	97	14	5080448	5081271	822	4	5630038	5631736	1106	15	5360536	5363567	722	6	1792937	1795853	374	15	1545711	1549244	357	e	0	0	0	0	0	0	no	#N/A	0
614	Hpan_g5926.t1	Adami_g13483.t1	PHAVENT1A004906P1	Petfic_v00_mik.OX345639.1G944.1	Choren_v00_mik.OX359202.1G704.1	Osclob_v00_mik.OX382156.1G81.1	7	328894	329439	98	14	5071888	5073251	818	4	5628424	5629920	1105	15	5363459	5367893	723	6	1796097	1797489	375	15	1549538	1550553	358	e	0	0	0	0	0	0	no	#N/A	0
615	Hpan_g5967.t1	Adami_g13513.t1	PHAVENT1A015365P1	Petfic_v00_mik.OX345639.1G743.1	Choren_v00_mik.OX359202.1G985.1	Osclob_v00_mik.OX382156.1G117.1	7	456378	459781	138	14	6592488	6595130	1149	4	4544573	4547510	876	15	5190094	5200218	685	6	2020685	2028403	413	15	1969841	1994813	411	e	0	0	0	0	0	0	no	#N/A	0
616	Hpan_g5973.t1	Adami_g13267.t1	PHAVENT1A013170P1	Petfic_v00_mik.OX345639.1G752.1	Choren_v00_mik.OX359202.1G216.1	Osclob_v00_mik.OX382156.1G597.1	7	2539065	2539558	687	14	878570	879414	251	4	4604718	4605573	888	15	6417889	6418984	947	6	511384	512407	101	15	2019064	2020586	417	e	0	0	0	0	0	0	no	#N/A	0
617	Hpan_g5992.t1	Adami_g13286.t1	PHAVENT1A008856P1	Petfic_v00_mik.OX345639.1G729.1	Choren_v00_mik.OX359202.1G15.1	Osclob_v00_mik.OX382156.1G640.1	7	2661817	2663491	741	14	83019	85863	22	4	4462056	4464379	857	15	6717942	6720407	1008	6	605464	608916	127	15	2143179	2146693	440	e	0	0	0	0	0	0	no	#N/A	0
618	Hpan_g5995.t1	Adami_g13289.t1	PHAVENT1A014404P1	Petfic_v00_mik.OX345639.1G731.1	Choren_v00_mik.OX359202.1G114.1	Osclob_v00_mik.OX382156.1G845.1	7	3218476	3219022	967	14	497650	498524	135	4	4474100	4475039	862	15	6722815	6723634	1011	6	611301	612259	130	15	2152524	2153087	444	e	0	0	0	0	0	0	no	#N/A	0
619	Hpan_g5996.t1	Adami_g13290.t1	PHAVENT1A023422P1	Petfic_v00_mik.OX345639.1G727.1	Choren_v00_mik.OX359202.1G106.1	Osclob_v00_mik.OX382150.1G1216.1	1	3951840	3952439	1456	14	494416	497248	134	4	4468128	4473931	861	15	6723314	6731893	1013	6	612480	618951	131	15	2153164	2161076	446	0	0	0	0	0	0	0	no	#N/A	0
620	Hpan_g6000.t1	Adami_g13294.t1	PHAVENT1A013718P1	Petfic_v00_mik.OX345639.1G737.1	Choren_v00_mik.OX359202.1G105.1	Osclob_v00_mik.OX382156.1G834.1	7	3217609	3218289	966	14	490557	492011	132	4	4477005	4478599	864	15	6732639	6736353	1016	6	623140	624584	136	15	2164247	2165226	449	e	0	0	0	0	0	0	no	#N/A	0
621	Hpan_g6001.t1	Adami_g13295.t1	PHAVENT1A008324P1	Petfic_v00_mik.OX345639.1G732.1	Choren_v00_mik.OX359202.1G112.1	Osclob_v00_mik.OX382156.1G844.1	7	3217089	3217574	965	14	490060	490477	131	4	4478708	4479180	865	15	6736359	6737407	1017	6	624780	625388	137	15	2165437	2165903	450	e	0	0	0	0	0	0	no	#N/A	0
622	Hpan_g6068.t1	Adami_g13332.t1	PHAVENT1A018506P1	Petfic_v00_mik.OX345639.1G702.1	Choren_v00_mik.OX359202.1G325.1	Osclob_v00_mik.OX382156.1G692.1	7	2791269	2792771	795	14	1550582	1556173	381	4	4332904	4335131	818	15	6305110	6309127	921	6	942891	948683	188	15	2653451	2655779	525	e	0	0	0	0	0	0	no	#N/A	0
623	Hpan_g6074.t1	Adami_g13471.t1	PHAVENT1A017077P1	Petfic_v00_mik.OX345639.1G957.1	Choren_v00_mik.OX359202.1G86.1	Osclob_v00_mik.OX382156.1G804.1	7	3145622	3146725	936	14	415167	416844	106	4	5694003	5695929	1122	15	5314713	5316862	707	6	1739064	1740377	361	15	2683230	2684801	532	e	0	0	0	0	0	0	no	#N/A	0
624	Hpan_g6084.t1	Adami_g13462.t1	PHAVENT1A016509P1	Petfic_v00_mik.OX345639.1G910.1	Choren_v00_mik.OX359202.1G805.1	Osclob_v00_mik.OX382156.1G54.1	7	235077	235736	60	14	5736198	5739455	941	4	5434751	5437166	1075	15	5246989	5247834	694	6	1659406	1661771	350	15	2741872	2746008	545	e	0	0	0	0	0	0	no	#N/A	0
625	Hpan_g6086.t1	Adami_g13461.t1	PHAVENT1A006219P1	Petfic_v00_mik.OX345639.1G915.1	Choren_v00_mik.OX359202.1G803.1	Osclob_v00_mik.OX382156.1G42.1	7	230723	234363	58	14	5727952	5735378	940	4	5491813	5501573	1084	15	5231787	5240551	691	6	1651453	1658821	349	15	2754741	2766612	547	e	0	0	0	0	0	0	no	#N/A	0
626	Hpan_g6171.t1	Adami_g13969.t1	PHAVENT1A001096P1	Petfic_v00_mik.OX345639.1G1283.1	Choren_v00_mik.OX359202.1G911.1	Osclob_v00_mik.OX382156.1G841.1	7	3236216	3237544	978	14	6329204	6330517	1066	4	8679072	8683600	1509	15	2737961	2754544	496	6	6081658	6091151	996	15	3655061	3657366	642	e	0	0	0	0	0	0	no	#N/A	0
627	Hpan_g6175.t1	Adami_g13950.t1	PHAVENT1A012174P1	Petfic_v00_mik.OX345639.1G1270.1	Choren_v00_mik.OX359202.1G795.1	Osclob_v00_mik.OX382156.1G650.1	7	2696449	2701289	757	14	5664771	5667352	933	4	8615672	8633586	1496	15	2531186	2547257	476	6	5877360	5902201	967	15	3674356	3678341	646	e	0	0	0	0	0	0	no	#N/A	0
628	Hpan_g6193.t1	Adami_g13693.t1	PHAVENT1A017696P1	Petfic_v00_mik.OX345639.1G1225.1	Choren_v00_mik.OX359202.1G172.1	Osclob_v00_mik.OX382156.1G629.1	7	2629291	2629959	732	14	717906	719380	207	4	8173611	8176409	1429	15	494458	496026	124	6	3639858	3641211	628	15	3836392	3838515	668	e	0	0	0	0	0	0	no	#N/A	0
629	Hpan_g6202.t1	Adami_g13789.t1	PHAVENT1A008348P1	Petfic_v00_mik.OX345639.1G1468.1	Choren_v00_mik.OX359202.1G104.2	Osclob_v00_mik.OX382156.1G565.1	7	2443775	2445854	652	14	483287	489893	130	4	9751812	9754468	1740	15	1026449	1030387	257	6	4317631	4321870	754	15	3897756	3903224	678	e	0	0	0	0	0	0	no	#N/A	0
630	Hpan_g6224.t1	Adami_g13791.t1	PHAVENT1A021667P1	Petfic_v00_mik.OX345639.1G1323.1	Choren_v00_mik.OX359202.1G681.1	Osclob_v00_mik.OX382156.1G10.1	7	120785	122156	12	14	4990810	4995608	801	4	8974613	8978706	1562	15	1032582	1036515	259	6	4328907	4331957	756	15	4037627	4042111	704	e	0	0	0	0	0	0	no	#N/A	0
631	Hpan_g6230.t1	Adami_g13793.t1	PHAVENT1A011486P1	Petfic_v00_mik.OX345639.1G1016.1	Choren_v00_mik.OX359202.1G1001.1	Osclob_v00_mik.OX382156.1G19.1	7	111552	112745	9	14	6689706	6690898	1172	4	6213163	6215897	1187	15	1038668	1041607	261	6	4335397	4339326	758	15	4056511	4059748	710	e	0	0	0	0	0	0	no	#N/A	0
632	Hpan_g6239.t1	Adami_g13586.t1	PHAVENT1A014933P1	Petfic_v00_mik.OX345639.1G1338.1	Choren_v00_mik.OX359196.1G1170.1	Osclob_v00_mik.OX382156.1G786.1	7	3054785	3056213	905	8	7643912	7645519	1400	4	9065465	9067422	1582	15	522821	525822	133	6	3009870	3011867	501	15	4095162	4097724	719	0	0	0	0	0	0	0	no	#N/A	0
633	Hpan_g6250.t1	Adami_g13704.t1	PHAVENT1A016705P1	Petfic_v00_mik.OX345639.1G1336.1	Choren_v00_mik.OX359202.1G426.1	Osclob_v00_mik.OX382156.1G187.1	7	707646	710293	229	14	2242541	2253009	507	4	9050413	9060946	1579	15	535850	540457	139	6	3671646	3676895	641	15	4129524	4139222	730	e	0	0	0	0	0	0	no	#N/A	0
634	Hpan_g6304.t1	Adami_g13742.t1	PHAVENT1A003732P1	Petfic_v00_mik.OX345639.1G1501.1	Choren_v00_mik.OX359202.1G29.1	Osclob_v00_mik.OX382156.1G744.1	7	2953909	2954834	858	14	109377	110878	28	4	9836192	9837412	1779	15	792174	795347	192	6	4028539	4031791	687	15	4600066	4601605	790	e	0	0	0	0	0	0	no	#N/A	0
635	Hpan_g6306.t1	Adami_g13740.t1	PHAVENT1A017076P1	Petfic_v00_mik.OX345639.1G1454.1	Choren_v00_mik.OX359202.1G30.1	Osclob_v00_mik.OX382156.1G763.1	7	3056275	3056711	906	14	116622	117087	30	4	9721160	9721924	1730	15	783695	784403	189	6	4018143	4018729	685	15	4609201	4610322	792	e	0	0	0	0	0	0	no	#N/A	0
636	Hpan_g6356.t1	Adami_g13746.t1	PHAVENT1A007054P1	Petfic_v00_mik.OX345639.1G1499.1	Choren_v00_mik.OX359193.1G996.1	Osclob_v00_mik.OX382159.1G318.1	10	1083418	1084826	362	5	6419899	6424954	1125	4	9830977	9832451	1775	15	803383	809030	197	6	4036679	4039281	692	15	4876448	4879840	850	0	0	0	0	0	0	0	no	#N/A	0
637	Hpan_g6375.t1	Adami_g13896.t1	PHAVENT1A020456P1	Petfic_v00_mik.OX345639.1G1433.1	Choren_v00_mik.OX359202.1G966.1	Osclob_v00_mik.OX382156.1G235.1	7	874249	877595	278	14	6526452	6530026	1136	4	9631139	9635353	1706	15	1912520	1926679	405	6	5278346	5297778	894	15	4952601	4965586	871	e	0	0	0	0	0	0	no	#N/A	0
638	Hpan_g6385.t1	Adami_g13845.t1	PHAVENT1A013318P1	Petfic_v00_mik.OX345639.1G1215.1	Choren_v00_mik.OX359202.1G941.1	Osclob_v00_mik.OX382156.1G646.1	7	2685240	2686260	749	14	6431875	6433235	1106	4	8124712	8132645	1420	15	1508604	1512724	332	6	4860791	4864689	826	15	4983004	4984978	881	e	0	0	0	0	0	0	no	#N/A	0
639	Hpan_g6386.t1	Adami_g13846.t1	PHAVENT1A015241P1	Petfic_v00_mik.OX345639.1G1218.1	Choren_v00_mik.OX359202.1G945.1	Osclob_v00_mik.OX382156.1G655.1	7	2682868	2685145	748	14	6428202	6431830	1105	4	8108051	8124531	1419	15	1512657	1519333	333	6	4864909	4870943	827	15	4985777	4989481	882	e	0	0	0	0	0	0	no	#N/A	0
640	Hpan_g6392.t1	Adami_g887.t1	PHAVENT1A013135P1	Petfic_v00_mik.OX345645.1G105.1	Choren_v00_mik.OX359195.1G1110.1	Osclob_v00_mik.OX382159.1G52.1	10	164231	166256	59	7	7641539	7644433	1286	10	363937	365780	110	22	3818132	3823777	488	1	7911345	7916099	921	15	5032153	5034282	889	0	0	0	0	0	0	0	no	#N/A	0
641	Hpan_g6414.t1	Adami_g13655.t1	PHAVENT1A008292P1	Petfic_v00_mik.OX345639.1G1441.1	Choren_v00_mik.OX359202.1G876.1	Osclob_v00_mik.OX382156.1G876.1	7	3352623	3354967	1018	14	6200403	6203994	1024	4	9658180	9660633	1712	15	315292	322163	68	6	3439767	3444736	587	15	5118165	5124951	913	e	0	0	0	0	0	0	no	#N/A	0
642	Hpan_g6417.t1	Adami_g13654.t1	PHAVENT1A015099P1	Petfic_v00_mik.OX345639.1G1460.1	Choren_v00_mik.OX359202.1G801.1	Osclob_v00_mik.OX382156.1G179.1	7	664745	669324	209	14	5714902	5720748	937	4	9683980	9689571	1721	15	303624	312537	65	6	3430577	3437939	586	15	5127356	5134842	916	e	0	0	0	0	0	0	no	#N/A	0
643	Hpan_g6420.t1	Adami_g13652.t1	PHAVENT1A004520P1	Petfic_v00_mik.OX345639.1G1334.1	Choren_v00_mik.OX359202.1G550.1	Osclob_v00_mik.OX382152.1G480.1	3	1670725	1672179	560	14	4042191	4067615	648	4	9030342	9033377	1575	15	294317	297047	63	6	3417766	3420343	584	15	5149728	5152514	919	0	0	0	0	0	0	0	no	#N/A	0
644	Hpan_g6421.t1	Adami_g13667.t1	PHAVENT1A003216P1	Petfic_v00_mik.OX345639.1G1462.1	Choren_v00_mik.OX359196.1G542.1	Osclob_v00_mik.OX382156.1G794.1	7	3094836	3096566	920	8	4508017	4518698	653	4	9714034	9716447	1727	15	372805	380360	88	6	3509797	3513469	601	15	5152722	5161119	920	0	0	0	0	0	0	0	no	#N/A	0
645	Hpan_g6428.t1	Adami_g13883.t1	PHAVENT1A003954P1	Petfic_v00_mik.OX345639.1G1511.1	Choren_v00_mik.OX359202.1G997.1	Osclob_v00_mik.OX382156.1G748.1	7	2968452	2972612	866	14	6676373	6682425	1169	4	9854187	9859957	1790	15	1813953	1833504	392	6	5155125	5170929	875	15	5217329	5226306	927	e	0	0	0	0	0	0	no	#N/A	0
646	Hpan_g6431.t1	Adami_g13886.t1	PHAVENT1A013756P1	Petfic_v00_mik.OX345639.1G1509.1	Choren_v00_mik.OX359202.1G973.1	Osclob_v00_mik.OX382156.1G838.1	7	3227321	3231076	973	14	6559616	6564620	1143	4	9880444	9884233	1795	15	1845063	1855131	396	6	5182117	5191823	878	15	5231348	5237014	931	e	0	0	0	0	0	0	no	#N/A	0
647	Hpan_g6443.t1	Adami_g13889.t1	PHAVENT1A022776P1	Petfic_v00_mik.OX345639.1G1508.1	Choren_v00_mik.OX359202.1G971.1	Osclob_v00_mik.OX382151.1G665.1	2	2473382	2474262	773	14	6548854	6554981	1141	4	9874042	9878540	1793	15	1880404	1901022	400	6	5214363	5235070	881	15	5290016	5296608	945	0	0	0	0	0	0	0	no	#N/A	0
649	Hpan_g6465.t1	Adami_g13617.t1	PHAVENT1A019187P1	Petfic_v00_mik.OX345639.1G1425.1	Choren_v00_mik.OX359202.1G19.1	Osclob_v00_mik.OX382156.1G440.1	7	2022750	2024466	514	14	81867	82981	21	4	9571102	9573069	1681	15	111483	113491	12	6	3246518	3249008	539	15	5381678	5382890	972	e	0	0	0	0	0	0	no	#N/A	0
650	Hpan_g6480.t1	Adami_g13612.t1	PHAVENT1A018492P1	Petfic_v00_mik.OX345639.1G1416.1	Choren_v00_mik.OX359202.1G353.1	Osclob_v00_mik.OX382156.1G119.1	7	467590	469497	142	14	1759217	1764300	416	4	9584111	9586625	1687	15	101072	104364	8	6	3231438	3234720	532	15	5414678	5417246	988	e	0	0	0	0	0	0	no	#N/A	0
651	Hpan_g6499.t1	Adami_g13775.t1	PHAVENT1A001285P1	Petfic_v00_mik.OX345639.1G1473.1	Choren_v00_mik.OX359202.1G987.1	Osclob_v00_mik.OX382156.1G687.1	7	2792850	2794234	796	14	6604914	6607651	1152	4	9774240	9775680	1754	15	924820	929927	233	6	4216023	4218511	726	15	5479873	5482363	1008	e	0	0	0	0	0	0	no	#N/A	0
652	Hpan_g6504.t1	Adami_g13770.t1	PHAVENT1A008364P1	Petfic_v00_mik.OX345639.1G1015.1	Choren_v00_mik.OX359202.1G1000.1	Osclob_v00_mik.OX382156.1G693.1	7	2794315	2795118	797	14	6687489	6688406	1171	4	6208979	6211561	1186	15	909848	912508	227	6	4194992	4197408	721	15	5499357	5500497	1016	e	0	0	0	0	0	0	no	#N/A	0
653	Hpan_g6515.t1	Adami_g13756.t1	PHAVENT1A010221P1	Petfic_v00_mik.OX345639.1G1482.1	Choren_v00_mik.OX359196.1G816.1	Osclob_v00_mik.OX382156.1G861.1	7	3271923	3274299	992	8	5889449	5892947	990	4	9797568	9800515	1762	15	862014	866603	212	6	4082793	4086856	703	15	5551195	5555151	1029	0	0	0	0	0	0	0	no	#N/A	0
654	Hpan_g6518.t1	Adami_g13759.t1	PHAVENT1A018438P1	Petfic_v00_mik.OX345639.1G1495.1	Choren_v00_mik.OX359202.1G644.1	Osclob_v00_mik.OX382156.1G531.1	7	2351629	2354155	617	14	4757828	4763758	757	4	9806537	9809085	1764	15	872211	876362	215	6	4092686	4096096	706	15	5562022	5565395	1032	e	0	0	0	0	0	0	no	#N/A	0
655	Hpan_g6535.t1	Adami_g13639.t1	PHAVENT1A014866P1	Petfic_v00_mik.OX345639.1G1355.1	Choren_v00_mik.OX359202.1G782.1	Osclob_v00_mik.OX382156.1G415.1	7	1925863	1928243	488	14	5582332	5587945	918	4	9130469	9135534	1601	15	247801	252041	49	6	3370967	3374747	568	15	5622652	5625998	1050	e	0	0	0	0	0	0	no	#N/A	0
656	Hpan_g6536.t1	Adami_g13640.t1	PHAVENT1A023158P1	Petfic_v00_mik.OX345639.1G1359.1	Choren_v00_mik.OX359202.1G872.1	Osclob_v00_mik.OX382158.1G29.1	9	62588	71243	35	14	6204208	6207115	1025	4	9127316	9130317	1600	15	243994	247979	48	6	3374996	3377915	569	15	5626369	5631030	1051	0	0	0	0	0	0	0	no	#N/A	0
657	Hpan_g6540.t1	Adami_g13644.t1	PHAVENT1A001403P1	Petfic_v00_mik.OX345639.1G1351.1	Choren_v00_mik.OX359190.1G1363.1	Osclob_v00_mik.OX382156.1G213.1	7	788886	792044	247	2	9646066	9651442	1594	4	9115848	9120818	1596	15	233030	237961	44	6	3385028	3390365	574	15	5635898	5641078	1055	0	0	0	0	0	0	0	no	#N/A	0
659	Hpan_g6585.t1	Adami_g13673.t1	PHAVENT1A021778P1	Petfic_v00_mik.OX345639.1G1381.1	Choren_v00_mik.OX359202.1G623.1	Osclob_v00_mik.OX382166.1G53.1	NA	162934	164881	57	14	4561495	4565210	736	4	9411356	9415157	1643	15	408166	411219	97	6	3546352	3550607	608	15	5861076	5863038	1106	0	0	0	0	0	0	0	no	#N/A	0
660	Hpan_g6586.t1	Adami_g13675.t1	PHAVENT1A009085P1	Petfic_v00_mik.OX345649.1G637.1	Choren_v00_mik.OX359202.1G592.1	Osclob_v00_mik.OX382156.1G740.1	7	2929502	2933314	849	14	4387136	4392338	699	14	5123107	5127438	774	15	418413	425707	99	6	3560349	3565878	610	15	5863302	5868162	1107	e	0	0	0	0	0	0	no	#N/A	0
661	Hpan_g6596.t1	Adami_g13622.t1	PHAVENT1A023312P1	Petfic_v00_mik.OX345639.1G1422.1	Choren_v00_mik.OX359202.1G305.1	Osclob_v00_mik.OX382156.1G218.1	7	841985	844072	262	14	1391639	1397022	353	4	9550723	9554594	1672	15	121329	124986	17	6	3258813	3262832	545	15	5896617	5900218	1117	e	0	0	0	0	0	0	no	#N/A	0
662	Hpan_g6607.t1	Adami_g13435.t1	PHAVENT1A009747P1	Petfic_v00_mik.OX345639.1G866.1	Choren_v00_mik.OX359202.1G163.1	Osclob_v00_mik.OX382156.1G476.1	7	2148903	2150332	552	14	670173	673526	193	4	5141768	5145861	1013	15	5578775	5583062	773	6	1541010	1544729	322	15	5962030	5963240	1128	e	0	0	0	0	0	0	no	#N/A	0
664	Hpan_g6620.t1	Adami_g8408.t1	PHAVENT1A005064P1	Petfic_v00_mik.OX345646.1G37.1	Choren_v00_mik.OX359189.1G207.1	Osclob_v00_mik.OX382160.1G261.1	11	783147	784068	282	1	969201	970907	245	11	139310	140933	50	23	5607691	5609404	727	2	22052172	22054660	2335	16	32904	33781	15	i	0	0	0	0	0	0	no	#N/A	0
665	Hpan_g6628.t1	Adami_g10976.t1	PHAVENT1A007760P1	Petfic_v00_mik.OX345646.1G209.1	Choren_v00_mik.OX359189.1G167.1	Osclob_v00_mik.OX382160.1G770.1	11	3044672	3045398	888	1	777240	778006	192	11	1258608	1262595	258	23	5226871	5228877	631	4	14688424	14688829	1184	16	49470	50260	23	i	0	0	0	0	0	0	no	#N/A	0
666	Hpan_g6639.t1	Adami_g6959.t1	PHAVENT1A001478P1	Petfic_v00_mik.OX345652.1G40.1	Choren_v00_mik.OX359196.1G1266.1	Osclob_v00_mik.OX382150.1G69.1	1	218204	219168	92	8	8072207	8073237	1524	17	196350	197874	54	8	5692648	5696754	802	2	4001529	4008139	580	16	80362	81633	34	a	0	0	0	0	0	0	no	#N/A	0
667	Hpan_g6643.t1	Adami_g6984.t1	PHAVENT1A011264P1	Petfic_v00_mik.OX345652.1G90.1	Choren_v00_mik.OX359196.1G1269.1	Osclob_v00_mik.OX382150.1G1586.1	1	5308050	5309991	1905	8	8087622	8089440	1529	17	451632	454129	108	8	6472486	6481868	882	2	4338281	4342598	608	16	88574	91261	38	a	0	0	0	0	0	0	no	#N/A	0
668	Hpan_g6692.t1	Adami_g6511.t1	PHAVENT1A019582P1	Petfic_v00_mik.OX345652.1G518.1	Choren_v00_mik.OX359196.1G986.1	Osclob_v00_mik.OX382153.1G90.1	4	363426	366560	120	8	6575037	6581392	1176	17	4402066	4408413	607	8	67177	71068	28	2	114711	120025	28	16	320071	323847	97	a	0	0	0	0	0	0	no	#N/A	0
669	Hpan_g6699.t1	Adami_g8057.t1	PHAVENT1A001563P1	Petfic_v00_mik.OX345646.1G120.1	Choren_v00_mik.OX359189.1G33.1	Osclob_v00_mik.OX382151.1G930.1	2	3422491	3426095	1077	1	84929	86186	28	11	458598	461052	141	23	3328204	3331826	312	2	19293153	19309432	1901	16	349252	350723	106	0	0	0	0	0	0	0	no	#N/A	0
670	Hpan_g6705.t1	Adami_g8071.t1	PHAVENT1A010963P1	Petfic_v00_mik.OX345646.1G684.1	Choren_v00_mik.OX359189.1G164.1	Osclob_v00_mik.OX382152.1G619.1	3	2281699	2283350	714	1	764816	772289	190	11	5734644	5743739	816	23	1798574	1816712	214	2	19460988	19474795	1916	16	366889	374559	114	0	0	0	0	0	0	0	no	#N/A	0
671	Hpan_g6708.t1	Adami_g8078.t1	PHAVENT1A004975P1	Petfic_v00_mik.OX345646.1G688.1	Choren_v00_mik.OX359189.1G640.1	Osclob_v00_mik.OX382160.1G36.1	11	113524	114593	39	1	3726793	3738982	769	11	5699757	5701418	807	23	679853	682394	118	2	19515101	19519642	1924	16	378476	379429	117	i	0	0	0	0	0	0	no	#N/A	0
672	Hpan_g6717.t1	Adami_g8326.t1	PHAVENT1A012762P1	Petfic_v00_mik.OX345646.1G81.1	Choren_v00_mik.OX359197.1G992.1	Osclob_v00_mik.OX382160.1G778.1	11	3075502	3077939	900	9	7020936	7024338	1161	11	281958	285356	97	23	4325895	4330292	456	2	21627016	21630311	2216	16	454387	456965	129	0	0	0	0	0	0	0	no	#N/A	0
673	Hpan_g6718.t1	Adami_g8309.t1	PHAVENT1A013604P1	Petfic_v00_mik.OX345646.1G115.1	Choren_v00_mik.OX359201.1G164.1	Osclob_v00_mik.OX382166.1G144.1	NA	400406	404245	163	13	785323	788664	197	11	453770	458488	140	23	4761591	4765410	526	2	21497556	21502830	2194	16	457001	459226	130	0	0	0	0	0	0	0	no	#N/A	0
674	Hpan_g6727.t1	Adami_g6526.t1	PHAVENT1A018316P1	Petfic_v00_mik.OX345652.1G659.1	Choren_v00_mik.OX359196.1G857.1	Osclob_v00_mik.OX382150.1G12.1	1	29713	30272	13	8	6092089	6092964	1036	17	4985151	4985908	759	8	2390552	2395381	449	2	239356	241241	45	16	530273	530917	140	a	0	0	0	0	0	0	no	#N/A	0
675	Hpan_g6729.t1	Adami_g6528.t1	PHAVENT1A006896P1	Petfic_v00_mik.OX345652.1G647.1	Choren_v00_mik.OX359196.1G831.1	Osclob_v00_mik.OX382150.1G7.1	1	30409	31425	14	8	6003382	6004833	1010	17	4994625	4995659	763	8	2410441	2416700	453	2	244349	250470	48	16	536280	537743	142	a	0	0	0	0	0	0	no	#N/A	0
676	Hpan_g6739.t1	Adami_g6552.t1	PHAVENT1A015725P1	Petfic_v00_mik.OX345652.1G676.1	Choren_v00_mik.OX359196.1G782.1	Osclob_v00_mik.OX382150.1G752.1	1	2518395	2521477	890	8	5662453	5666505	937	17	5082111	5085172	790	8	459601	466058	134	2	426926	427665	77	16	581926	586295	154	a	0	0	0	0	0	0	no	#N/A	0
677	Hpan_g6743.t1	Adami_g7101.t1	PHAVENT1A019065P1	Petfic_v00_mik.OX345653.1G11.1	Choren_v00_mik.OX359191.1G934.1	Osclob_v00_mik.OX382165.1G459.1	16	2215229	2216608	541	3	7678694	7681929	1094	18	55906	58292	8	8	5065738	5077769	738	2	5585620	5607211	757	16	599035	601229	158	h	0	0	0	0	0	0	no	#N/A	0
678	Hpan_g6746.t1	Adami_g6517.t1	PHAVENT1A021355P1	Petfic_v00_mik.OX345652.1G581.1	Choren_v00_mik.OX359193.1G1485.1	Osclob_v00_mik.OX382150.1G756.1	1	2532529	2534157	896	5	8792468	8794178	1713	17	4736827	4739017	680	8	1265837	1271909	284	2	149477	152696	35	16	615757	617484	161	0	0	0	0	0	0	0	no	#N/A	0
679	Hpan_g6748.t1	Adami_g6627.t1	PHAVENT1A005989P1	Petfic_v00_mik.OX345652.1G594.1	Choren_v00_mik.OX359196.1G909.1	Osclob_v00_mik.OX382150.1G380.1	1	1361404	1362740	449	8	6305390	6308249	1107	17	4800998	4803267	697	8	133345	134622	50	2	937728	942412	165	16	622052	624653	163	a	0	0	0	0	0	0	no	#N/A	0
680	Hpan_g6750.t1	Adami_g6631.t1	PHAVENT1A004843P1	Petfic_v00_mik.OX345652.1G493.1	Choren_v00_mik.OX359196.1G796.1	Osclob_v00_mik.OX382150.1G386.1	1	1362917	1365580	450	8	5804379	5807937	974	17	4267479	4272821	580	8	151689	155741	57	2	969595	974254	169	16	637424	640797	168	a	0	0	0	0	0	0	no	#N/A	0
681	Hpan_g6753.t1	Adami_g6621.t1	PHAVENT1A011422P1	Petfic_v00_mik.OX345652.1G503.1	Choren_v00_mik.OX359196.1G974.1	Osclob_v00_mik.OX382150.1G487.1	1	1694163	1698504	578	8	6539458	6544780	1172	17	4316238	4326739	587	8	187146	192676	69	2	885841	894212	159	16	643206	647999	172	a	0	0	0	0	0	0	no	#N/A	0
682	Hpan_g6766.t1	Adami_g6610.t1	PHAVENT1A003360P1	Petfic_v00_mik.OX345652.1G508.1	Choren_v00_mik.OX359196.1G1075.1	Osclob_v00_mik.OX382150.1G133.1	1	428778	430867	158	8	7105342	7108510	1290	17	4359911	4363508	596	8	228428	231430	80	2	836720	840238	144	16	685111	687864	188	a	0	0	0	0	0	0	no	#N/A	0
683	Hpan_g6770.t1	Adami_g6823.t1	PHAVENT1A014414P1	Petfic_v00_mik.OX345652.1G339.1	Choren_v00_mik.OX359196.1G995.1	Osclob_v00_mik.OX382150.1G218.1	1	841524	842307	258	8	6647699	6649398	1191	17	2571487	2575161	401	8	91800	92856	36	2	2375039	2378599	408	16	697615	699040	192	a	0	0	0	0	0	0	no	#N/A	0
685	Hpan_g6782.t1	Adami_g6795.t1	PHAVENT1A009268P1	Petfic_v00_mik.OX345652.1G566.1	Choren_v00_mik.OX359196.1G832.1	Osclob_v00_mik.OX382150.1G112.1	1	366801	369671	138	8	6007459	6011660	1012	17	4657332	4669088	662	8	4279266	4305351	677	2	2197187	2210617	372	16	726227	732892	206	a	0	0	0	0	0	0	no	#N/A	0
686	Hpan_g6783.t1	Adami_g6794.t1	PHAVENT1A017107P1	Petfic_v00_mik.OX345652.1G565.1	Choren_v00_mik.OX359196.1G839.1	Osclob_v00_mik.OX382150.1G111.1	1	365192	366373	137	8	6004978	6006256	1011	17	4669349	4672018	663	8	4305377	4308354	678	2	2195144	2196783	371	16	733298	734412	207	a	0	0	0	0	0	0	no	#N/A	0
687	Hpan_g6787.t1	Adami_g8189.t1	PHAVENT1A011956P1	Petfic_v00_mik.OX345646.1G132.1	Choren_v00_mik.OX359194.1G878.1	Osclob_v00_mik.OX382160.1G310.1	11	939935	941926	338	6	7161211	7163173	1038	11	517396	519621	153	23	5436756	5439277	672	2	20549801	20552525	2053	16	741789	743784	212	0	0	0	0	0	0	0	no	#N/A	0
688	Hpan_g6798.t1	Adami_g8199.t1	PHAVENT1A007346P1	Petfic_v00_mik.OX345646.1G6.1	Choren_v00_mik.OX359189.1G2.1	Osclob_v00_mik.OX382160.1G158.1	11	485151	485741	176	1	9380	9894	3	11	44942	45528	7	23	5389300	5394075	663	2	20684295	20686619	2064	16	788547	789440	223	i	0	0	0	0	0	0	no	#N/A	0
689	Hpan_g6811.t1	Adami_g8211.t1	PHAVENT1A022006P1	Petfic_v00_mik.OX345646.1G5.1	Choren_v00_mik.OX359189.1G94.1	Osclob_v00_mik.OX382160.1G1.1	11	77	7129	1	1	363695	370974	105	11	40376	43101	5	23	5314060	5325604	649	2	20821300	20837469	2081	16	837860	842903	236	i	0	0	0	0	0	0	no	#N/A	0
690	Hpan_g6818.t1	Adami_g7021.t1	PHAVENT1A018171P1	Petfic_v00_mik.OX345652.1G86.1	Choren_v00_mik.OX359196.1G1171.1	Osclob_v00_mik.OX382150.1G513.1	1	1782927	1785215	613	8	7647772	7652462	1402	17	413589	417727	100	8	6811510	6819819	931	2	4865851	4893155	649	16	855362	858368	244	a	0	0	0	0	0	0	no	#N/A	0
691	Hpan_g6819.t1	Adami_g7023.t1	PHAVENT1A013017P1	Petfic_v00_mik.OX345652.1G80.1	Choren_v00_mik.OX359196.1G1090.1	Osclob_v00_mik.OX382150.1G512.1	1	1781719	1782676	612	8	7216639	7218451	1310	17	417850	419871	101	8	6804770	6811543	930	2	4893415	4899880	651	16	858491	859643	245	a	0	0	0	0	0	0	no	#N/A	0
692	Hpan_g6826.t1	Adami_g8300.t1	PHAVENT1A015153P1	Petfic_v00_mik.OX345646.1G137.1	Choren_v00_mik.OX359189.1G341.1	Osclob_v00_mik.OX382151.1G680.1	2	2544750	2549698	799	1	1746368	1754102	411	11	559602	566136	161	23	4914696	4922757	552	2	21455715	21463969	2185	16	874220	879619	252	0	0	0	0	0	0	0	no	#N/A	0
693	Hpan_g6829.t1	Adami_g8294.t1	PHAVENT1A022160P1	Petfic_v00_mik.OX345646.1G141.1	Choren_v00_mik.OX359189.1G29.1	Osclob_v00_mik.OX382166.1G64.1	NA	177675	183729	68	1	108181	112160	35	11	640374	644700	169	23	4840364	4842457	542	2	21380377	21382339	2177	16	882710	884908	256	0	0	0	0	0	0	0	no	#N/A	0
694	Hpan_g6837.t1	Adami_g8306.t1	PHAVENT1A012005P1	Petfic_v00_mik.OX345646.1G128.1	Choren_v00_mik.OX359189.1G62.1	Osclob_v00_mik.OX382160.1G95.1	11	263294	265339	103	1	205511	208447	57	11	525640	533912	156	23	4952593	4960869	560	2	21480542	21489608	2191	16	940956	945555	264	i	0	0	0	0	0	0	no	#N/A	0
695	Hpan_g6848.t1	Adami_g8339.t1	PHAVENT1A000294P1	Petfic_v00_mik.OX345646.1G69.1	Choren_v00_mik.OX359189.1G369.1	Osclob_v00_mik.OX382168.1G483.1	19	2117653	2122406	578	1	1956167	1967899	440	11	233795	241989	83	23	4445251	4461577	480	2	21735719	21746042	2232	16	977764	982567	275	0	0	0	0	0	0	0	no	#N/A	0
697	Hpan_g6867.t1	Adami_g8133.t1	PHAVENT1A013400P1	Petfic_v00_mik.OX345646.1G20.1	Choren_v00_mik.OX359189.1G100.1	Osclob_v00_mik.OX382160.1G113.1	11	369646	372242	135	1	415097	421474	119	11	56667	61101	14	23	5541391	5546421	701	2	20040893	20051415	1991	16	1033515	1040161	296	i	0	0	0	0	0	0	no	#N/A	0
701	Hpan_g6889.t1	Adami_g8204.t1	PHAVENT1A002403P1	Petfic_v00_mik.OX345646.1G118.1	Choren_v00_mik.OX359189.1G120.1	Osclob_v00_mik.OX382160.1G141.1	11	351567	353190	126	1	488678	491427	141	11	448163	451139	138	23	5372473	5375346	659	2	20734891	20739593	2074	16	1124697	1126930	321	i	0	0	0	0	0	0	no	#N/A	0
702	Hpan_g6903.t1	Adami_g6684.t1	PHAVENT1A014929P1	Petfic_v00_mik.OX345652.1G542.1	Choren_v00_mik.OX359196.1G992.1	Osclob_v00_mik.OX382150.1G99.1	1	327068	329025	119	8	6632035	6634556	1187	17	4533847	4537373	637	8	1645966	1650569	365	2	1301837	1305724	235	16	1162981	1164994	338	a	0	0	0	0	0	0	no	#N/A	0
703	Hpan_g6909.t1	Adami_g6675.t1	PHAVENT1A014700P1	Petfic_v00_mik.OX345652.1G352.1	Choren_v00_mik.OX359196.1G988.1	Osclob_v00_mik.OX382162.1G181.1	13	588724	590302	193	8	6606604	6608836	1183	17	2778956	2782555	423	8	1520541	1523709	334	2	1233574	1236269	224	16	1186956	1188934	345	0	0	0	0	0	0	0	no	#N/A	0
704	Hpan_g6914.t1	Adami_g6690.t1	PHAVENT1A008294P1	Petfic_v00_mik.OX345652.1G554.1	Choren_v00_mik.OX359196.1G883.1	Osclob_v00_mik.OX382151.1G296.1	2	974849	979664	331	8	6174325	6179345	1060	17	4601191	4609431	650	8	1806503	1816978	380	2	1359457	1369593	243	16	1209272	1215601	350	0	0	0	0	0	0	0	no	#N/A	0
705	Hpan_g6915.t1	Adami_g6691.t1	PHAVENT1A002658P1	Petfic_v00_mik.OX345652.1G575.1	Choren_v00_mik.OX359196.1G875.1	Osclob_v00_mik.OX382150.1G297.1	1	1083778	1085180	349	8	6181458	6183078	1061	17	4713120	4715374	673	8	1816495	1819227	381	2	1369774	1371242	244	16	1215742	1217330	351	a	0	0	0	0	0	0	no	#N/A	0
706	Hpan_g6917.t1	Adami_g6693.t1	PHAVENT1A012679P1	Petfic_v00_mik.OX345652.1G543.1	Choren_v00_mik.OX359196.1G891.1	Osclob_v00_mik.OX382151.1G153.1	2	482716	490872	174	8	6217277	6226771	1076	17	4561966	4579316	642	8	1835727	1855025	384	2	1386315	1404753	246	16	1227643	1236218	353	0	0	0	0	0	0	0	no	#N/A	0
707	Hpan_g6928.t1	Adami_g6499.t1	PHAVENT1A013039P1	Petfic_v00_mik.OX345652.1G602.1	Choren_v00_mik.OX359196.1G788.1	Osclob_v00_mik.OX382150.1G105.1	1	353771	356431	133	8	5721627	5725085	951	17	4845533	4849649	714	8	23934	28186	13	2	56418	62325	12	16	1262310	1265605	365	a	0	0	0	0	0	0	no	#N/A	0
708	Hpan_g6932.t1	Adami_g6503.t1	PHAVENT1A017297P1	Petfic_v00_mik.OX345652.1G605.1	Choren_v00_mik.OX359196.1G848.1	Osclob_v00_mik.OX382162.1G157.1	13	509049	521280	170	8	6047186	6054671	1028	17	4858124	4866916	719	8	33608	41471	19	2	70824	83015	18	16	1271843	1278382	371	0	0	0	0	0	0	0	no	#N/A	0
709	Hpan_g6943.t1	Adami_g6715.t1	PHAVENT1A006971P1	Petfic_v00_mik.OX345652.1G632.1	Choren_v00_mik.OX359196.1G921.1	Osclob_v00_mik.OX382150.1G757.1	1	2534349	2538523	897	8	6320594	6325506	1109	17	4925154	4929790	738	8	1253036	1261207	279	2	1531419	1539117	277	16	1340056	1344515	385	a	0	0	0	0	0	0	no	#N/A	0
710	Hpan_g6950.t1	Adami_g6762.t1	PHAVENT1A000797P1	Petfic_v00_mik.OX345652.1G405.1	Choren_v00_mik.OX359196.1G1017.1	Osclob_v00_mik.OX382150.1G161.1	1	524817	525814	194	8	6765800	6767707	1220	17	3408310	3416656	479	8	2917780	2933399	515	2	1938941	1944481	333	16	1371217	1373120	393	a	0	0	0	0	0	0	no	#N/A	0
711	Hpan_g6955.t1	Adami_g7069.t1	PHAVENT1A003075P1	Petfic_v00_mik.OX345652.1G73.1	Choren_v00_mik.OX359192.1G1020.1	Osclob_v00_mik.OX382167.1G155.1	18	391031	394329	161	4	6974372	6978777	1210	17	343636	357005	85	8	7235475	7247247	987	2	5300629	5314411	717	16	1393870	1398628	399	0	0	0	0	0	0	0	no	#N/A	0
712	Hpan_g6961.t1	Adami_g7071.t1	PHAVENT1A013236P1	Petfic_v00_mik.OX345652.1G58.1	Choren_v00_mik.OX359196.1G924.1	Osclob_v00_mik.OX382153.1G52.1	4	181102	182225	58	8	6336090	6338173	1111	17	285885	287175	74	8	7256026	7260757	989	2	5329623	5333108	719	16	1419599	1420743	407	a	0	0	0	0	0	0	no	#N/A	0
713	Hpan_g6964.t1	Adami_g7062.t1	PHAVENT1A001464P1	Petfic_v00_mik.OX345652.1G59.1	Choren_v00_mik.OX359196.1G1209.1	Osclob_v00_mik.OX382150.1G1585.1	1	5306691	5307900	1904	8	7821372	7823131	1450	17	287328	289168	75	8	7182350	7187657	981	2	5223514	5227068	707	16	1432332	1433957	410	a	0	0	0	0	0	0	no	#N/A	0
714	Hpan_g6998.t1	Adami_g8123.t1	PHAVENT1A013054P1	Petfic_v00_mik.OX345646.1G709.1	Choren_v00_mik.OX359189.1G565.1	Osclob_v00_mik.OX382160.1G210.1	11	650443	657257	223	1	3171704	3182319	680	11	5852258	5863076	840	23	2812064	2829797	279	2	19922601	19932668	1977	16	1685244	1692415	446	i	0	0	0	0	0	0	no	#N/A	0
715	Hpan_g6999.t1	Adami_g6545.t1	PHAVENT1A003288P1	Petfic_v00_mik.OX345652.1G366.1	Choren_v00_mik.OX359196.1G936.1	Osclob_v00_mik.OX382152.1G571.1	3	2116859	2117968	658	8	6393658	6396430	1129	17	2903177	2908242	434	8	431360	433764	124	2	394065	396338	70	16	1692559	1693687	447	0	0	0	0	0	0	0	no	#N/A	0
716	Hpan_g7002.t1	Adami_g8261.t1	PHAVENT1A019738P1	Petfic_v00_mik.OX345646.1G662.1	Choren_v00_mik.OX359189.1G70.1	Osclob_v00_mik.OX382160.1G87.1	11	228007	228655	89	1	238602	239652	72	11	5561875	5563299	783	23	4967758	4969960	563	2	21232605	21234390	2139	16	1697213	1698452	450	i	0	0	0	0	0	0	no	#N/A	0
719	Hpan_g7026.t1	Adami_g8112.t1	PHAVENT1A014955P1	Petfic_v00_mik.OX345646.1G706.1	Choren_v00_mik.OX359189.1G615.1	Osclob_v00_mik.OX382168.1G371.1	19	1719192	1722049	449	1	3550074	3551943	742	11	5826452	5828342	834	23	2763179	2765062	273	2	19819880	19821770	1966	16	1779135	1781019	479	0	0	0	0	0	0	0	no	#N/A	0
720	Hpan_g7045.t1	Adami_g6734.t1	PHAVENT1A003845P1	Petfic_v00_mik.OX345652.1G481.1	Choren_v00_mik.OX359196.1G1023.1	Osclob_v00_mik.OX382159.1G66.1	10	265639	266599	82	8	6885949	6887774	1231	17	4092532	4094444	562	8	2531566	2534497	470	2	1694565	1699248	302	16	1831951	1832978	502	0	0	0	0	0	0	0	no	#N/A	0
722	Hpan_g7076.t1	Adami_g6805.t1	PHAVENT1A008561P2	Petfic_v00_mik.OX345652.1G642.1	Choren_v00_mik.OX359196.1G878.1	Osclob_v00_mik.OX382150.1G215.1	1	840193	841328	257	8	6154136	6156611	1054	17	4946055	4948185	743	8	4403698	4412657	693	2	2262228	2266902	385	16	1939405	1941038	540	a	0	0	0	0	0	0	no	#N/A	0
723	Hpan_g7080.t1	Adami_g6521.t1	PHAVENT1A022684P1	Petfic_v00_mik.OX345653.1G511.1	Choren_v00_mik.OX359196.1G841.1	Osclob_v00_mik.OX382150.1G219.1	1	844422	845239	259	8	6019628	6020488	1016	18	4125899	4133723	617	8	115538	117129	42	2	172270	174089	39	16	1956360	1958559	545	a	0	0	0	0	0	0	no	#N/A	0
724	Hpan_g7090.t1	Adami_g8323.t1	PHAVENT1A000315P1	Petfic_v00_mik.OX345646.1G105.1	Choren_v00_mik.OX359189.1G27.1	Osclob_v00_mik.OX382160.1G399.1	11	1246584	1247585	444	1	102731	103764	32	11	380711	382559	123	23	4619699	4624099	509	2	21619724	21622144	2213	16	2015116	2016157	555	i	0	0	0	0	0	0	no	#N/A	0
725	Hpan_g7092.t1	Adami_g8325.t1	PHAVENT1A011506P1	Petfic_v00_mik.OX345646.1G104.1	Choren_v00_mik.OX359189.1G34.1	Osclob_v00_mik.OX382160.1G28.1	11	89204	89594	29	1	104062	104638	33	11	374364	375382	120	23	4615572	4617535	507	2	21625378	21626381	2215	16	2018054	2018711	557	i	0	0	0	0	0	0	no	#N/A	0
726	Hpan_g7096.t1	Adami_g8355.t1	PHAVENT1A008199P1	Petfic_v00_mik.OX345646.1G82.1	Choren_v00_mik.OX359189.1G19.1	Osclob_v00_mik.OX382160.1G270.1	11	850633	853408	302	1	47281	51815	17	11	285513	291314	98	23	4570763	4581438	503	2	21816448	21820330	2257	16	2033873	2037343	561	i	0	0	0	0	0	0	no	#N/A	0
727	Hpan_g7114.t1	Adami_g6700.t1	PHAVENT1A014453P1	Petfic_v00_mik.OX345652.1G604.1	Choren_v00_mik.OX359196.1G977.1	Osclob_v00_mik.OX382150.1G452.1	1	1596979	1597793	535	8	6536359	6538391	1169	17	4854365	4855659	717	8	1545625	1547956	341	2	1439430	1440661	255	16	2131601	2132909	579	a	0	0	0	0	0	0	no	#N/A	0
728	Hpan_g7136.t1	Adami_g6968.t1	PHAVENT1A004362P1	Petfic_v00_mik.OX345652.1G92.1	Choren_v00_mik.OX359201.1G900.1	Osclob_v00_mik.OX382166.1G124.1	NA	353753	354688	138	13	6398532	6399659	1067	17	459442	460787	111	8	5585009	5595826	782	2	4062190	4065029	589	16	2213568	2214676	605	0	0	0	0	0	0	0	no	#N/A	0
729	Hpan_g7146.t1	Adami_g6867.t1	PHAVENT1A014141P1	Petfic_v00_mik.OX345652.1G19.1	Choren_v00_mik.OX359196.1G1200.1	Osclob_v00_mik.OX382150.1G742.1	1	2516329	2516967	888	8	7776074	7781740	1439	17	79804	80453	26	8	1354232	1359375	295	2	2937174	2945259	457	16	2275228	2275802	615	a	0	0	0	0	0	0	no	#N/A	0
730	Hpan_g7147.t1	Adami_g6607.t1	PHAVENT1A013382P1	Petfic_v00_mik.OX345652.1G197.1	Choren_v00_mik.OX359196.1G962.1	Osclob_v00_mik.OX382150.1G132.1	1	419493	426719	157	8	6475522	6486134	1149	17	1203108	1236689	234	8	236719	249147	83	2	822582	831168	141	16	2276093	2284980	616	a	0	0	0	0	0	0	no	#N/A	0
731	Hpan_g7177.t1	Adami_g6776.t1	PHAVENT1A000942P1	Petfic_v00_mik.OX345652.1G530.1	Choren_v00_mik.OX359196.1G1062.1	Osclob_v00_mik.OX382159.1G335.1	10	1134401	1137040	383	8	7050685	7056467	1274	17	4475550	4481773	623	8	3533201	3543962	585	2	2034880	2040535	349	16	2452931	2457452	659	0	0	0	0	0	0	0	no	#N/A	0
732	Hpan_g7184.t1	Adami_g6768.t1	PHAVENT1A022898P1	Petfic_v00_mik.OX345652.1G560.1	Choren_v00_mik.OX359196.1G1106.1	Osclob_v00_mik.OX382166.1G303.1	NA	947075	948955	341	8	7297909	7305579	1327	17	4623018	4628470	655	8	3146645	3159753	545	2	1977055	1987726	339	16	2474876	2479967	666	0	0	0	0	0	0	0	no	#N/A	0
734	Hpan_g7203.t1	Adami_g6736.t1	PHAVENT1A016819P1	Petfic_v00_mik.OX345652.1G478.1	Choren_v00_mik.OX359196.1G1033.1	Osclob_v00_mik.OX382152.1G599.1	3	2216631	2218149	695	8	6913409	6916251	1238	17	4083038	4088105	560	8	2522520	2527719	467	2	1703926	1707584	304	16	2554272	2556889	688	0	0	0	0	0	0	0	no	#N/A	0
735	Hpan_g7205.t1	Adami_g5124.t1	PHAVENT1A006426P1	Petfic_v00_mik.OX345647.1G562.1	Choren_v00_mik.OX359193.1G979.1	Osclob_v00_mik.OX382157.1G437.1	8	1908808	1909907	507	5	6367320	6368602	1112	12	5326332	5328263	690	10	390699	393121	98	13	253678	255389	67	16	2558409	2559267	690	0	0	0	0	0	0	0	no	#N/A	0
736	Hpan_g7206.t1	Adami_g6833.t1	PHAVENT1A010353P1	Petfic_v00_mik.OX345652.1G562.1	Choren_v00_mik.OX359196.1G1250.1	Osclob_v00_mik.OX382150.1G1851.1	1	6194069	6194763	2214	8	8039699	8040556	1517	17	4634504	4636169	658	8	661086	664413	181	2	2483224	2486814	420	16	2559623	2560572	691	a	0	0	0	0	0	0	no	#N/A	0
737	Hpan_g7208.t1	Adami_g6831.t1	PHAVENT1A008680P1	Petfic_v00_mik.OX345652.1G359.1	Choren_v00_mik.OX359196.1G1255.1	Osclob_v00_mik.OX382150.1G118.1	1	388399	392825	146	8	8023948	8034995	1515	17	2815467	2855116	428	8	681529	715256	185	2	2424353	2463200	418	16	2566076	2577604	693	a	0	0	0	0	0	0	no	#N/A	0
738	Hpan_g7232.t1	Adami_g13549.t1	PHAVENT1A008920P1	Petfic_v00_mik.OX345646.1G186.1	Choren_v00_mik.OX359189.1G151.1	Osclob_v00_mik.OX382160.1G813.1	11	3153229	3154213	938	1	653545	655000	171	11	1014937	1022815	223	23	1214482	1221421	170	6	2391249	2411277	457	16	2667030	2668490	722	i	0	0	0	0	0	0	no	#N/A	0
739	Hpan_g7240.t1	Adami_g8252.t1	PHAVENT1A002905P1	Petfic_v00_mik.OX345646.1G309.1	Choren_v00_mik.OX359202.1G173.1	Osclob_v00_mik.OX382160.1G411.1	11	1277479	1281302	458	14	696630	702481	201	11	2062530	2094937	380	23	5101926	5110134	599	2	21169906	21179017	2127	16	2720936	2725832	733	0	0	0	0	0	0	0	no	#N/A	0
740	Hpan_g7250.t1	Adami_g8246.t1	PHAVENT1A007622P1	Petfic_v00_mik.OX345646.1G311.1	Choren_v00_mik.OX359189.1G16.1	Osclob_v00_mik.OX382160.1G790.1	11	3102884	3106301	912	1	35412	37872	13	11	2145107	2154710	383	23	5139839	5142696	607	2	21103481	21106317	2121	16	2772200	2775444	744	i	0	0	0	0	0	0	no	#N/A	0
741	Hpan_g7258.t1	Adami_g8241.t1	PHAVENT1A011077P1	Petfic_v00_mik.OX345646.1G34.1	Choren_v00_mik.OX359189.1G104.1	Osclob_v00_mik.OX382160.1G46.1	11	151593	152370	56	1	444020	445128	126	11	125067	126043	44	23	5166464	5169383	613	2	21073032	21075637	2115	16	2802529	2803910	754	i	0	0	0	0	0	0	no	#N/A	0
742	Hpan_g7259.t1	Adami_g8238.t1	PHAVENT1A016338P1	Petfic_v00_mik.OX345646.1G197.1	Choren_v00_mik.OX359198.1G804.2	Osclob_v00_mik.OX382160.1G419.1	11	1320798	1322498	469	10	6072723	6075127	970	11	1139093	1142100	238	23	5170651	5173850	614	2	21045523	21048319	2111	16	2804108	2805838	755	0	0	0	0	0	0	0	no	#N/A	0
743	Hpan_g7260.t1	Adami_g8237.t1	PHAVENT1A018484P1	Petfic_v00_mik.OX345646.1G198.1	Choren_v00_mik.OX359189.1G219.1	Osclob_v00_mik.OX382160.1G254.1	11	738464	738801	265	1	1091729	1092130	253	11	1156103	1156404	241	23	5173821	5174530	615	2	21042906	21045363	2110	16	2806107	2806555	756	i	0	0	0	0	0	0	no	#N/A	0
745	Hpan_g7277.t1	Adami_g8368.t1	PHAVENT1A022202P1	Petfic_v00_mik.OX345646.1G88.1	Choren_v00_mik.OX359189.1G5.1	Osclob_v00_mik.OX382160.1G196.1	11	590187	590658	211	1	33954	34388	11	11	337707	338167	108	23	4242833	4244711	443	2	21879804	21881363	2277	16	2872360	2872847	778	i	0	0	0	0	0	0	no	#N/A	0
746	Hpan_g7288.t1	Adami_g8272.t1	PHAVENT1A021478P1	Petfic_v00_mik.OX345646.1G576.1	Choren_v00_mik.OX359189.1G342.1	Osclob_v00_mik.OX382160.1G274.1	11	877640	878481	315	1	1741607	1743134	409	11	4758974	4767363	687	23	5013270	5016669	579	2	21275266	21281254	2151	16	2905468	2907279	791	i	0	0	0	0	0	0	no	#N/A	0
747	Hpan_g7295.t1	Adami_g8274.t1	PHAVENT1A008589P1	Petfic_v00_mik.OX345646.1G578.1	Choren_v00_mik.OX359189.1G328.1	Osclob_v00_mik.OX382160.1G101.1	11	258038	258893	100	1	1684443	1687282	392	11	4770090	4783145	688	23	5019608	5023144	581	2	21286003	21289652	2154	16	2924411	2928565	799	i	0	0	0	0	0	0	no	#N/A	0
748	Hpan_g7297.t1	Adami_g8276.t1	PHAVENT1A018096P1	Petfic_v00_mik.OX345646.1G579.1	Choren_v00_mik.OX359189.1G329.1	Osclob_v00_mik.OX382155.1G167.1	6	542292	543539	201	1	1695453	1697091	394	11	4794477	4795616	691	23	5029727	5030677	583	2	21296531	21297593	2157	16	2931809	2932823	801	0	0	0	0	0	0	0	no	#N/A	0
749	Hpan_g7298.t1	Adami_g8278.t1	PHAVENT1A005229P1	Petfic_v00_mik.OX345646.1G582.1	Choren_v00_mik.OX359189.1G336.1	Osclob_v00_mik.OX382160.1G302.1	11	938507	939766	337	1	1725082	1726489	405	11	4826144	4832114	696	23	5042631	5044693	585	2	21308181	21311478	2159	16	2934276	2939131	802	i	0	0	0	0	0	0	no	#N/A	0
750	Hpan_g7315.t1	Adami_g6929.t1	PHAVENT1A022533P1	Petfic_v00_mik.OX345652.1G22.1	Choren_v00_mik.OX359196.1G1146.1	Osclob_v00_mik.OX382150.1G63.2	1	200924	201994	85	8	7498907	7500360	1375	17	98346	99768	33	8	6151191	6155181	843	2	3702702	3706208	541	16	3064730	3067973	820	a	0	0	0	0	0	0	no	#N/A	0
751	Hpan_g7327.t1	Adami_g6538.t1	PHAVENT1A006393P1	Petfic_v00_mik.OX345652.1G365.1	Choren_v00_mik.OX359196.1G947.1	Osclob_v00_mik.OX382150.1G1780.1	1	5889188	5890091	2133	8	6392902	6393594	1128	17	2906303	2910620	435	8	383934	385492	115	2	344247	346582	60	16	3153193	3157742	835	a	0	0	0	0	0	0	no	#N/A	0
752	Hpan_g7361.t1	Adami_g11698.t1	PHAVENT1A001531P1	Petfic_v00_mik.OX345652.1G162.1	Choren_v00_mik.OX359202.1G68.1	Osclob_v00_mik.OX382150.1G750.1	1	2509820	2516243	887	14	291432	298319	76	17	925464	944581	197	8	7471774	7477186	1029	5	71228	88315	6	16	3563291	3576094	870	0	0	0	0	0	0	0	no	#N/A	0
753	Hpan_g7364.t1	Adami_g6857.t1	PHAVENT1A013284P1	Petfic_v00_mik.OX345652.1G131.2	Choren_v00_mik.OX359196.1G1160.1	Osclob_v00_mik.OX382150.1G1528.1	1	5016607	5017041	1843	8	7622445	7623144	1394	17	740249	741469	159	8	911029	913364	197	2	2761271	2762494	444	16	3595915	3598349	875	a	0	0	0	0	0	0	no	#N/A	0
755	Hpan_g7370.t1	Adami_g6853.t1	PHAVENT1A000975P1	Petfic_v00_mik.OX345652.1G464.1	Choren_v00_mik.OX359196.1G1169.1	Osclob_v00_mik.OX382150.1G518.1	1	1780682	1781357	611	8	7642639	7643624	1399	17	3989904	3992568	543	8	939719	941630	205	2	2734570	2736803	440	16	3629483	3630485	882	a	0	0	0	0	0	0	no	#N/A	0
756	Hpan_g7384.t1	Adami_g8287.t1	PHAVENT1A010312P1	Petfic_v00_mik.OX345646.1G144.1	Choren_v00_mik.OX359189.1G225.1	Osclob_v00_mik.OX382160.1G404.1	11	1273575	1275949	456	1	1131529	1139977	268	11	649593	653981	171	23	4817390	4822239	535	2	21359859	21364313	2169	16	3719258	3724440	899	i	0	0	0	0	0	0	no	#N/A	0
757	Hpan_g7394.t1	Adami_g6651.t1	PHAVENT1A005616P1	Petfic_v00_mik.OX345652.1G672.1	Choren_v00_mik.OX359196.1G1044.1	Osclob_v00_mik.OX382150.1G184.1	1	621680	625922	220	8	6979405	6983772	1254	17	5094957	5099166	795	8	2124317	2138747	427	2	1087161	1096935	192	16	3786569	3794695	910	a	0	0	0	0	0	0	no	#N/A	0
758	Hpan_g7441.t1	Adami_g6885.t1	PHAVENT1A018934P1	Petfic_v00_mik.OX345652.1G3.1	Choren_v00_mik.OX359196.1G1253.1	Osclob_v00_mik.OX382150.1G137.1	1	445001	446750	164	8	8017353	8019957	1512	17	25540	27140	3	8	1213233	1216502	273	2	3146061	3150187	479	16	4158744	4163211	959	a	0	0	0	0	0	0	no	#N/A	0
759	Hpan_g7591.t1	Adami_g7992.t1	PHAVENT1A015213P1	Petfic_v00_mik.OX345646.1G716.1	Choren_v00_mik.OX359189.1G173.1	Osclob_v00_mik.OX382160.1G200.1	11	639370	639930	221	1	817751	818529	202	11	5876893	5877591	844	23	1561614	1568131	200	2	18462052	18463627	1817	16	5267081	5267996	1134	i	0	0	0	0	0	0	no	#N/A	0
760	Hpan_g7632.t1	Adami_g6571.t1	PHAVENT1A011750P1	Petfic_v00_mik.OX345652.1G510.1	Choren_v00_mik.OX359196.1G1078.1	Osclob_v00_mik.OX382156.1G712.1	7	2864096	2865564	825	8	7131710	7133791	1291	17	4381880	4388086	603	8	332240	334920	107	2	529270	532471	98	16	5660602	5666185	1186	0	0	0	0	0	0	0	no	#N/A	0
761	Hpan_g7633.t1	Adami_g6570.t1	PHAVENT1A008215P1	Petfic_v00_mik.OX345652.1G514.1	Choren_v00_mik.OX359196.1G1145.1	Osclob_v00_mik.OX382157.1G82.1	8	257183	257947	97	8	7495965	7498800	1374	17	4388595	4389994	604	8	335135	337465	108	2	527082	528126	97	16	5666420	5667292	1187	0	0	0	0	0	0	0	no	#N/A	0
762	Hpan_g7636.t1	Adami_g6569.t1	PHAVENT1A002439P1	Petfic_v00_mik.OX345652.1G519.1	Choren_v00_mik.OX359196.1G1147.1	Osclob_v00_mik.OX382154.1G418.1	5	1370320	1371838	478	8	7490710	7495925	1373	17	4418588	4423066	610	8	337498	338733	109	2	522711	526939	96	16	5675584	5678493	1190	0	0	0	0	0	0	0	no	#N/A	0
763	Hpan_g7651.t1	Adami_g6882.t1	PHAVENT1A023588P1	Petfic_v00_mik.OX345652.1G1.1	Choren_v00_mik.OX359192.1G1174.1	Osclob_v00_mik.OX382150.1G294.1	1	1107296	1110093	359	4	7791592	7797487	1395	17	12011	23667	1	8	1487550	1493364	326	2	3115475	3121423	476	16	5768978	5775787	1207	0	0	0	0	0	0	0	no	#N/A	0
764	Hpan_g7655.t1	Adami_g7040.t1	PHAVENT1A003569P1	Petfic_v00_mik.OX345652.1G82.1	Choren_v00_mik.OX359196.1G1264.1	Osclob_v00_mik.OX382150.1G279.1	1	1060389	1064440	337	8	8092539	8096468	1533	17	378174	383188	92	8	7129067	7135821	975	2	5017427	5025549	675	16	5791298	5798631	1212	a	0	0	0	0	0	0	no	#N/A	0
765	Hpan_g7656.t1	Adami_g7029.t1	PHAVENT1A021800P1	Petfic_v00_mik.OX345652.1G84.1	Choren_v00_mik.OX359196.1G1198.1	Osclob_v00_mik.OX382150.1G33.1	1	80224	81719	35	8	7784507	7786690	1441	17	397224	404282	96	8	6851956	6862361	938	2	4935059	4938739	660	16	5798817	5800334	1213	a	0	0	0	0	0	0	no	#N/A	0
766	Hpan_g7674.t1	Adami_g14729.t1	PHAVENT1A021752P1	Petfic_v00_mik.OX345643.1G844.1	Choren_v00_mik.OX359192.1G806.1	Osclob_v00_mik.OX382151.1G748.1	2	2812415	2813083	870	4	5958344	5959315	957	8	6897284	6898079	997	16	6326228	6328601	921	6	14868763	14870557	1903	17	29548	30240	13	d	0	0	0	0	0	0	no	#N/A	0
767	Hpan_g7675.t1	Adami_g14730.t1	PHAVENT1A013477P1	Petfic_v00_mik.OX345643.1G835.1	Choren_v00_mik.OX359192.1G795.1	Osclob_v00_mik.OX382151.1G750.1	2	2819023	2819761	876	4	5959416	5960096	958	8	6898181	6899045	998	16	6328724	6330615	922	6	14870714	14872411	1904	17	30391	31070	14	d	0	0	0	0	0	0	no	#N/A	0
768	Hpan_g7678.t1	Adami_g14733.t1	PHAVENT1A023393P1	Petfic_v00_mik.OX345643.1G837.1	Choren_v00_mik.OX359192.1G1150.1	Osclob_v00_mik.OX382151.1G43.1	2	139744	144289	53	4	7707598	7711387	1370	8	6902123	6907920	1001	16	6336749	6343413	927	6	14878352	14886013	1908	17	33676	38826	17	d	0	0	0	0	0	0	no	#N/A	0
769	Hpan_g7684.t1	Adami_g14737.t1	PHAVENT1A014117P1	Petfic_v00_mik.OX345643.1G841.1	Choren_v00_mik.OX359192.1G1291.1	Osclob_v00_mik.OX382151.1G46.1	2	155453	156333	57	4	8318499	8319882	1533	8	6927026	6927806	1008	16	6354981	6357443	934	6	14907883	14909170	1912	17	47188	48043	23	d	0	0	0	0	0	0	no	#N/A	0
770	Hpan_g7690.t1	Adami_g14760.t1	PHAVENT1A017944P1	Petfic_v00_mik.OX345643.1G858.1	Choren_v00_mik.OX359192.1G951.1	Osclob_v00_mik.OX382151.1G879.1	2	3259952	3261724	1022	4	6642005	6643792	1124	8	6949449	6950941	1022	16	6434928	6438482	948	6	15070165	15072842	1943	17	65620	66738	29	d	0	0	0	0	0	0	no	#N/A	0
771	Hpan_g7730.t1	Adami_g14807.t1	PHAVENT1A003756P1	Petfic_v00_mik.OX345640.1G182.1	Choren_v00_mik.OX359192.1G1013.1	Osclob_v00_mik.OX382158.1G80.1	9	227869	233833	95	4	6916891	6923509	1195	5	1200909	1211084	225	16	6672143	6681936	989	6	15478298	15487650	2005	17	201982	209521	77	0	0	0	0	0	0	0	no	#N/A	0
772	Hpan_g7734.t1	Adami_g14813.t1	PHAVENT1A009005P1	Petfic_v00_mik.OX345643.1G810.1	Choren_v00_mik.OX359192.1G1242.1	Osclob_v00_mik.OX382166.1G244.1	NA	736521	739835	272	4	8081614	8087775	1476	8	6815234	6818358	973	16	6709932	6715836	999	6	15513419	15523184	2011	17	221618	225724	81	0	0	0	0	0	0	0	no	#N/A	0
773	Hpan_g7745.t1	Adami_g14801.t1	PHAVENT1A004072P1	Petfic_v00_mik.OX345643.1G794.1	Choren_v00_mik.OX359192.1G1326.1	Osclob_v00_mik.OX382151.1G231.1	2	767512	768406	261	4	8542729	8544014	1577	8	6671665	6673187	944	16	6495128	6496735	962	6	15410477	15412841	1996	17	293812	295199	93	d	0	0	0	0	0	0	no	#N/A	0
774	Hpan_g7774.t1	Adami_g14775.t1	PHAVENT1A022950P1	Petfic_v00_mik.OX345643.1G769.1	Choren_v00_mik.OX359192.1G932.1	Osclob_v00_mik.OX382169.1G196.1	20	996561	1005610	238	4	6577240	6584803	1110	8	6583871	6591378	923	16	6820883	6826064	1033	6	15181138	15187979	1966	17	406101	412048	126	0	0	0	0	0	0	0	no	#N/A	0
775	Hpan_g7777.t1	Adami_g14774.t1	PHAVENT1A004624P1	Petfic_v00_mik.OX345643.1G879.1	Choren_v00_mik.OX359192.1G790.1	Osclob_v00_mik.OX382151.1G946.1	2	3466010	3466349	1090	4	5934958	5935382	949	8	6972983	6973353	1031	16	6828707	6829139	1035	6	15176849	15177295	1965	17	419963	420334	129	d	0	0	0	0	0	0	no	#N/A	0
776	Hpan_g7788.t1	Adami_g14711.t1	PHAVENT1A021827P1	Petfic_v00_mik.OX345643.1G733.1	Choren_v00_mik.OX359192.1G846.1	Osclob_v00_mik.OX382151.1G280.2	2	946854	949726	315	4	6178219	6181649	1008	8	6353228	6358535	874	16	6136061	6140521	889	6	14749313	14754507	1881	17	459656	462744	140	d	0	0	0	0	0	0	no	#N/A	0
777	Hpan_g7843.t1	Adami_g14717.t1	PHAVENT1A017248P1	Petfic_v00_mik.OX345643.1G750.1	Choren_v00_mik.OX359192.1G936.1	Osclob_v00_mik.OX382158.1G756.1	9	3204748	3209629	910	4	6602127	6611736	1118	8	6452605	6464607	892	16	6077406	6099650	882	6	14773184	14799064	1892	17	696428	715016	205	0	0	0	0	0	0	0	no	#N/A	0
778	Hpan_g7844.t1	Adami_g14721.t1	PHAVENT1A022348P1	Petfic_v00_mik.OX345643.1G749.1	Choren_v00_mik.OX359192.1G1264.1	Osclob_v00_mik.OX382151.1G630.1	2	2363311	2364473	739	4	8205988	8207116	1506	8	6445432	6447147	890	16	6075236	6077084	881	6	14799542	14801342	1893	17	715367	717015	206	d	0	0	0	0	0	0	no	#N/A	0
779	Hpan_g7848.t1	Adami_g14714.t1	PHAVENT1A008709P1	Petfic_v00_mik.OX345643.1G756.1	Choren_v00_mik.OX359192.1G1110.1	Osclob_v00_mik.OX382151.1G852.1	2	3160391	3162821	991	4	7552456	7556226	1324	8	6528334	6531248	904	16	6122766	6126091	886	6	14763159	14767190	1885	17	726008	729380	210	d	0	0	0	0	0	0	no	#N/A	0
780	Hpan_g7857.t1	Adami_g14743.t1	PHAVENT1A020642P1	Petfic_v00_mik.OX345643.1G865.1	Choren_v00_mik.OX359192.1G1148.1	Osclob_v00_mik.OX382151.1G89.1	2	277574	281735	96	4	7697970	7703722	1367	8	6961972	6965356	1028	16	6407282	6414482	944	6	14939895	14948651	1920	17	745050	748309	221	d	0	0	0	0	0	0	no	#N/A	0
781	Hpan_g7860.t1	Adami_g14814.t1	PHAVENT1A014313P1	Petfic_v00_mik.OX345643.1G825.1	Choren_v00_mik.OX359199.1G728.1	Osclob_v00_mik.OX382151.1G888.1	2	3283332	3284215	1029	11	5335618	5337055	870	8	6814168	6815053	972	16	6716287	6717895	1000	6	15523800	15525911	2012	17	760020	760939	224	0	0	0	0	0	0	0	no	#N/A	0
782	Hpan_g7865.t1	Adami_g14742.t1	PHAVENT1A005187P1	Petfic_v00_mik.OX345643.1G878.1	Choren_v00_mik.OX359192.1G1108.1	Osclob_v00_mik.OX382151.1G790.1	2	2916580	2919189	918	4	7525966	7530744	1319	8	6965666	6970118	1029	16	6395400	6406393	943	6	14926678	14939347	1919	17	774313	780909	229	d	0	0	0	0	0	0	no	#N/A	0
783	Hpan_g7892.t1	Adami_g14493.t1	PHAVENT1A000023P1	Petfic_v00_mik.OX345643.1G609.1	Choren_v00_mik.OX359192.1G1362.1	Osclob_v00_mik.OX382156.1G504.1	7	2193524	2194465	575	4	8727119	8727771	1617	8	5533244	5534536	729	16	5111381	5115023	713	6	11961844	11962417	1630	17	992063	992932	259	0	0	0	0	0	0	0	no	#N/A	0
784	Hpan_g7919.t1	Adami_g14483.t1	PHAVENT1A000123P1	Petfic_v00_mik.OX345643.1G585.1	Choren_v00_mik.OX359192.1G1284.1	Osclob_v00_mik.OX382151.1G94.1	2	306898	307806	106	4	8328007	8328581	1535	8	5355978	5357430	703	16	5042503	5043656	694	6	11869749	11871154	1620	17	1166258	1166833	296	d	0	0	0	0	0	0	no	#N/A	0
785	Hpan_g7928.t1	Adami_g14465.t1	PHAVENT1A021577P1	Petfic_v00_mik.OX345643.1G622.1	Choren_v00_mik.OX359192.1G1012.1	Osclob_v00_mik.OX382151.1G92.1	2	298398	303668	102	4	6991065	6996732	1214	8	5612518	5625244	744	16	4831014	4848187	675	6	11553884	11567680	1599	17	1227187	1233327	307	d	0	0	0	0	0	0	no	#N/A	0
786	Hpan_g7933.t1	Adami_g14605.t1	PHAVENT1A019094P1	Petfic_v00_mik.OX345643.1G870.1	Choren_v00_mik.OX359192.1G1072.1	Osclob_v00_mik.OX382151.1G743.1	2	2810350	2812340	869	4	7290795	7293781	1272	8	6995818	6997822	1039	16	5924065	5928772	854	6	13238688	13252160	1763	17	1258461	1262040	312	d	0	0	0	0	0	0	no	#N/A	0
787	Hpan_g7959.t1	Adami_g14582.t1	PHAVENT1A016112P1	Petfic_v00_mik.OX345643.1G873.1	Choren_v00_mik.OX359192.1G962.1	Osclob_v00_mik.OX382151.1G451.1	2	1397738	1398856	509	4	6710265	6711270	1146	8	7011338	7012206	1045	16	5851975	5853455	836	6	12888307	12889638	1735	17	1456427	1458087	341	d	0	0	0	0	0	0	no	#N/A	0
788	Hpan_g7960.t1	Adami_g14581.t1	PHAVENT1A022602P1	Petfic_v00_mik.OX345643.1G886.1	Choren_v00_mik.OX359192.1G787.1	Osclob_v00_mik.OX382151.1G444.1	2	1398926	1400124	510	4	5933219	5934560	948	8	7012252	7013487	1046	16	5849053	5851430	835	6	12885564	12887686	1734	17	1458234	1460249	342	d	0	0	0	0	0	0	no	#N/A	0
789	Hpan_g8005.t1	Adami_g14547.t1	PHAVENT1A021963P1	Petfic_v00_mik.OX345643.1G709.1	Choren_v00_mik.OX359192.1G802.1	Osclob_v00_mik.OX382151.1G993.1	2	3658014	3658365	1150	4	6013541	6014114	975	8	6199202	6200402	842	16	5382001	5384138	740	6	12550043	12553134	1693	17	1727360	1728723	394	d	0	0	0	0	0	0	no	#N/A	0
790	Hpan_g8009.t1	Adami_g14553.t1	PHAVENT1A000337P1	Petfic_v00_mik.OX345643.1G712.1	Choren_v00_mik.OX359192.1G894.1	Osclob_v00_mik.OX382151.1G785.1	2	2936114	2940170	920	4	6444528	6449781	1067	8	6223247	6234890	848	16	5337762	5352153	734	6	12577987	12600559	1700	17	1746677	1755319	398	d	0	0	0	0	0	0	no	#N/A	0
791	Hpan_g8012.t1	Adami_g14557.t1	PHAVENT1A014421P1	Petfic_v00_mik.OX345643.1G713.1	Choren_v00_mik.OX359192.1G938.1	Osclob_v00_mik.OX382151.1G289.1	2	964048	967719	323	4	6626653	6630670	1120	8	6235606	6249213	849	16	5258396	5278468	728	6	12634360	12650045	1704	17	1769996	1780174	401	d	0	0	0	0	0	0	no	#N/A	0
792	Hpan_g8028.t1	Adami_g14507.t1	PHAVENT1A016964P1	Petfic_v00_mik.OX345642.1G22.1	Choren_v00_mik.OX359192.1G1054.1	Osclob_v00_mik.OX382151.1G963.1	2	3539414	3554095	1111	4	7210435	7212807	1252	7	113205	113741	34	16	5226930	5234152	723	6	12177499	12184062	1649	17	1860728	1864137	422	d	0	0	0	0	0	0	no	#N/A	0
793	Hpan_g8071.t1	Adami_g14382.t1	PHAVENT1A015278P1	Petfic_v00_mik.OX345643.1G663.1	Choren_v00_mik.OX359192.1G1231.1	Osclob_v00_mik.OX382166.1G50.1	NA	161671	162820	56	4	8065535	8066966	1472	8	5881583	5886568	795	16	3978265	3986528	603	6	10731741	10737378	1503	17	2435128	2439759	471	0	0	0	0	0	0	0	no	#N/A	0
794	Hpan_g8072.t1	Adami_g14381.t1	PHAVENT1A011612P1	Petfic_v00_mik.OX345643.1G660.1	Choren_v00_mik.OX359192.1G834.1	Osclob_v00_mik.OX382166.1G52.1	NA	160304	161569	55	4	6088489	6091371	994	8	5854458	5860234	791	16	3965976	3978198	602	6	10718899	10731232	1502	17	2440269	2445231	472	0	0	0	0	0	0	0	no	#N/A	0
795	Hpan_g8076.t1	Adami_g14365.t1	PHAVENT1A020837P1	Petfic_v00_mik.OX345643.1G668.1	Choren_v00_mik.OX359192.1G942.1	Osclob_v00_mik.OX382150.1G771.1	1	2631553	2632073	922	4	6654119	6654532	1129	8	5907211	5910120	800	16	3922478	3930580	595	6	10616255	10624275	1482	17	2461406	2466446	476	0	0	0	0	0	0	0	no	#N/A	0
797	Hpan_g8079.t1	Adami_g14369.t1	PHAVENT1A013348P1	Petfic_v00_mik.OX345643.1G684.1	Choren_v00_mik.OX359192.1G950.1	Osclob_v00_mik.OX382151.1G909.1	2	3380095	3380555	1062	4	6630776	6631352	1121	8	6022762	6024076	818	16	3913199	3914947	592	6	10643028	10644479	1487	17	2482874	2484016	479	d	0	0	0	0	0	0	no	#N/A	0
798	Hpan_g8094.t1	Adami_g13995.t1	PHAVENT1A003721P1	Petfic_v00_mik.OX345643.1G598.1	Choren_v00_mik.OX359196.1G2.1	Osclob_v00_mik.OX382154.1G64.1	5	302728	303445	90	8	47779	48737	4	8	5455537	5459562	717	16	3589717	3591729	559	6	6308016	6310971	1031	17	2616597	2618911	495	0	0	0	0	0	0	0	no	#N/A	0
800	Hpan_g8127.t1	Adami_g3369.t1	PHAVENT1A012527P1	Petfic_v00_mik.OX345642.1G88.1	Choren_v00_mik.OX359200.1G717.1	Osclob_v00_mik.OX382152.1G1090.1	3	3867749	3873626	1274	12	5160807	5179175	830	7	421087	426929	114	21	948738	997841	231	11	4420791	4439367	729	17	2802529	2814621	531	b	0	0	0	0	0	0	no	#N/A	0
801	Hpan_g8135.t1	Adami_g14273.t1	PHAVENT1A000931P1	Petfic_v00_mik.OX345643.1G435.1	Choren_v00_mik.OX359190.1G1039.1	Osclob_v00_mik.OX382161.1G659.1	12	2518207	2522509	753	2	7454496	7470359	1191	8	3671043	3696399	521	16	3173423	3255531	542	6	9389145	9415803	1374	17	2925578	2944130	540	f	0	0	0	0	0	0	no	#N/A	0
802	Hpan_g8155.t1	Adami_g14311.t1	PHAVENT1A015750P1	Petfic_v00_mik.OX345643.1G122.1	Choren_v00_mik.OX359192.1G1312.1	Osclob_v00_mik.OX382160.1G10.1	11	49309	58301	14	4	8467459	8479278	1564	8	485249	515638	143	16	3084214	3159324	538	6	9783423	9785298	1418	17	3099762	3113488	560	0	0	0	0	0	0	0	no	#N/A	0
803	Hpan_g8167.t1	Adami_g14136.t1	PHAVENT1A009528P1	Petfic_v00_mik.OX345643.1G160.1	Choren_v00_mik.OX359192.1G1200.1	Osclob_v00_mik.OX382151.1G370.1	2	1191921	1197069	418	4	7912041	7915963	1426	8	773607	778418	187	16	931954	937045	217	6	7944369	7949218	1202	17	3175529	3182636	574	d	0	0	0	0	0	0	no	#N/A	0
805	Hpan_g8208.t1	Adami_g14010.t1	PHAVENT1A008797P1	Petfic_v00_mik.OX345643.1G241.1	Choren_v00_mik.OX359192.1G1036.1	Osclob_v00_mik.OX382151.1G3.1	2	17831	23351	8	4	7080461	7088406	1228	8	1529409	1561745	288	16	2238330	2257630	430	6	6525568	6544373	1049	17	3541148	3593235	632	d	0	0	0	0	0	0	no	#N/A	0
806	Hpan_g8239.t1	Adami_g14020.t1	PHAVENT1A017700P1	Petfic_v00_mik.OX345643.1G477.1	Choren_v00_mik.OX359192.1G1178.1	Osclob_v00_mik.OX382151.1G68.1	2	252095	253115	84	4	7835756	7836639	1404	8	4112650	4117314	571	16	2124728	2128972	407	6	6647338	6651435	1061	17	3710883	3714217	667	d	0	0	0	0	0	0	no	#N/A	0
807	Hpan_g8251.t1	Adami_g14034.t1	PHAVENT1A007875P1	Petfic_v00_mik.OX345643.1G491.1	Choren_v00_mik.OX359192.1G1395.1	Osclob_v00_mik.OX382151.1G719.1	2	2674529	2678506	836	4	8817440	8818696	1641	8	4234718	4236457	587	16	1980471	1982537	385	6	6887785	6889261	1078	17	3772365	3773717	683	d	0	0	0	0	0	0	no	#N/A	0
808	Hpan_g8255.t1	Adami_g14067.t1	PHAVENT1A013353P1	Petfic_v00_mik.OX345643.1G63.1	Choren_v00_mik.OX359192.1G1410.1	Osclob_v00_mik.OX382151.1G650.1	2	2421746	2423400	762	4	8910141	8912954	1671	8	241324	243420	68	16	1637834	1642153	353	6	7359094	7368388	1117	17	3812284	3815703	687	d	0	0	0	0	0	0	no	#N/A	0
809	Hpan_g8256.t1	Adami_g14068.t1	PHAVENT1A020004P1	Petfic_v00_mik.OX345643.1G53.1	Choren_v00_mik.OX359192.1G1181.1	Osclob_v00_mik.OX382150.1G351.1	1	1281461	1284360	426	4	7836705	7838641	1405	8	239197	241311	67	16	1639403	1646638	354	6	7368666	7376762	1118	17	3815854	3818517	688	0	0	0	0	0	0	0	no	#N/A	0
810	Hpan_g8298.t1	Adami_g14056.t1	PHAVENT1A017082P1	Petfic_v00_mik.OX345643.1G49.1	Choren_v00_mik.OX359196.1G707.1	Osclob_v00_mik.OX382151.1G310.1	2	1022904	1025472	349	8	5361419	5365471	853	8	209697	214477	58	16	1715308	1723327	358	6	7158010	7165033	1106	17	4126544	4130542	737	0	0	0	0	0	0	0	no	#N/A	0
811	Hpan_g8329.t1	Adami_g14082.t1	PHAVENT1A014829P1	Petfic_v00_mik.OX345643.1G31.1	Choren_v00_mik.OX359192.1G1349.1	Osclob_v00_mik.OX382158.1G148.1	9	488469	489882	177	4	8685072	8694587	1606	8	105786	107994	18	16	1363068	1369175	311	6	7487474	7492671	1132	17	4292904	4296959	769	0	0	0	0	0	0	0	no	#N/A	0
812	Hpan_g8366.t1	Adami_g14119.t1	PHAVENT1A022185P1	Petfic_v00_mik.OX345643.1G171.1	Choren_v00_mik.OX359192.1G1399.1	Osclob_v00_mik.OX382151.1G159.1	2	500655	506801	178	4	8838318	8840938	1645	8	848783	851604	197	16	1102523	1105651	256	6	7820537	7824920	1180	17	4577579	4581766	813	d	0	0	0	0	0	0	no	#N/A	0
813	Hpan_g8391.t1	Adami_g14114.t1	PHAVENT1A016513P1	Petfic_v00_mik.OX345643.1G12.1	Choren_v00_mik.OX359199.1G726.1	Osclob_v00_mik.OX382151.1G342.1	2	1083388	1086443	372	11	5324136	5329587	866	8	72077	74858	7	16	1166256	1176662	271	6	7754066	7766547	1173	17	4776235	4781113	839	0	0	0	0	0	0	0	no	#N/A	0
814	Hpan_g8394.t1	Adami_g14112.t1	PHAVENT1A014545P1	Petfic_v00_mik.OX345643.1G13.1	Choren_v00_mik.OX359192.1G1334.1	Osclob_v00_mik.OX382151.1G1107.1	2	4066974	4067841	1283	4	8628981	8631372	1592	8	76559	77215	9	16	1159810	1161162	268	6	7741033	7745481	1170	17	4787947	4788740	842	d	0	0	0	0	0	0	no	#N/A	0
815	Hpan_g8399.t1	Adami_g14129.t1	PHAVENT1A022838P1	Petfic_v00_mik.OX345643.1G153.1	Choren_v00_mik.OX359192.1G990.1	Osclob_v00_mik.OX382152.1G1033.1	3	3625270	3627603	1197	4	6834080	6835524	1176	8	748299	751293	180	16	960190	962024	224	6	7912546	7913866	1194	17	4796810	4798148	847	0	0	0	0	0	0	0	no	#N/A	0
816	Hpan_g8419.t1	Adami_g14055.t1	PHAVENT1A023088P1	Petfic_v00_mik.OX345643.1G393.1	Choren_v00_mik.OX359192.1G1404.1	Osclob_v00_mik.OX382164.1G20.1	15	91457	93607	33	4	8879037	8881752	1657	8	2995580	3013491	468	16	1884257	1899354	372	6	7128987	7145965	1105	17	4914236	4920356	872	0	0	0	0	0	0	0	no	#N/A	0
817	Hpan_g8420.t1	Adami_g14054.t1	PHAVENT1A000638P1	Petfic_v00_mik.OX345643.1G392.1	Choren_v00_mik.OX359192.1G1398.1	Osclob_v00_mik.OX382151.1G976.1	2	3591382	3599998	1128	4	8828133	8838161	1644	8	3013521	3042865	469	16	1899546	1924220	373	6	7104260	7128505	1104	17	4920927	4934855	873	d	0	0	0	0	0	0	no	#N/A	0
819	Hpan_g8459.t1	Adami_g14226.t1	PHAVENT1A012606P1	Petfic_v00_mik.OX345643.1G269.1	Choren_v00_mik.OX359192.1G1223.1	Osclob_v00_mik.OX382151.1G210.1	2	673161	673547	233	4	7990647	7991619	1453	8	1828216	1830514	323	16	116106	116588	52	6	9136826	9137672	1313	17	5092949	5093296	918	d	0	0	0	0	0	0	no	#N/A	0
820	Hpan_g8480.t1	Adami_g14288.t1	PHAVENT1A002103P1	Petfic_v00_mik.OX345636.1G5146.1	Choren_v00_mik.OX359191.1G917.1	Osclob_v00_mik.OX382152.1G241.1	3	739787	745848	263	3	7531917	7538180	1066	1	43640625	43657022	5747	16	2886599	2894562	512	6	9528285	9535991	1390	17	5155949	5159471	940	0	0	0	0	0	0	0	no	#N/A	0
821	Hpan_g8498.t1	Adami_g14289.t1	PHAVENT1A010237P1	Petfic_v00_mik.OX345643.1G439.1	Choren_v00_mik.OX359192.1G876.1	Osclob_v00_mik.OX382151.1G373.1	2	1199931	1201587	420	4	6335791	6337834	1045	8	3700404	3710888	524	16	2935984	2943886	520	6	9537284	9544170	1391	17	5212887	5214855	959	d	0	0	0	0	0	0	no	#N/A	0
822	Hpan_g8519.t1	Adami_g14257.t1	PHAVENT1A013872P1	Petfic_v00_mik.OX345643.1G70.1	Choren_v00_mik.OX359192.1G1210.1	Osclob_v00_mik.OX382151.1G966.1	2	3561490	3564065	1116	4	7942959	7947086	1436	8	298579	301897	90	16	62570	65469	33	6	9317945	9322102	1355	17	5292581	5295760	982	d	0	0	0	0	0	0	no	#N/A	0
823	Hpan_g8520.t1	Adami_g14258.t1	PHAVENT1A003682P1	Petfic_v00_mik.OX345643.1G69.1	Choren_v00_mik.OX359192.1G1206.1	Osclob_v00_mik.OX382151.1G961.1	2	3560832	3561346	1115	4	7942853	7943410	1435	8	284781	285356	87	16	61637	62477	32	6	9322474	9323863	1356	17	5295977	5296528	983	d	0	0	0	0	0	0	no	#N/A	0
824	Hpan_g8526.t1	Adami_g14264.t1	PHAVENT1A000691P1	Petfic_v00_mik.OX345643.1G74.1	Choren_v00_mik.OX359192.1G1215.1	Osclob_v00_mik.OX382151.1G391.1	2	1247788	1248887	443	4	7957602	7958680	1443	8	339003	341082	102	16	42830	44205	25	6	9342693	9345378	1363	17	5313204	5314464	990	d	0	0	0	0	0	0	no	#N/A	0
825	Hpan_g8532.t1	Adami_g14269.t1	PHAVENT1A023010P1	Petfic_v00_mik.OX345643.1G91.1	Choren_v00_mik.OX359191.1G861.1	Osclob_v00_mik.OX382151.1G379.1	2	1225807	1230590	431	3	7283975	7289773	1007	8	359518	362632	107	16	21347	24118	17	6	9366436	9370127	1370	17	5331173	5334319	996	0	0	0	0	0	0	0	no	#N/A	0
826	Hpan_g8538.t1	Adami_g14179.t1	PHAVENT1A022211P1	Petfic_v00_mik.OX345643.1G180.1	Choren_v00_mik.OX359192.1G812.1	Osclob_v00_mik.OX382151.1G808.1	2	2999617	3003137	943	4	5998454	6004587	971	8	917861	927202	208	16	657814	663938	164	6	8522824	8534193	1253	17	5349096	5352449	1004	d	0	0	0	0	0	0	no	#N/A	0
827	Hpan_g8546.t1	Adami_g14135.t1	PHAVENT1A022325P1	Petfic_v00_mik.OX345643.1G157.1	Choren_v00_mik.OX359192.1G1204.1	Osclob_v00_mik.OX382162.1G479.1	13	2064432	2067161	559	4	7931548	7932903	1432	8	769999	773491	186	16	935140	940055	218	6	7941206	7944291	1201	17	5374471	5376232	1015	0	0	0	0	0	0	0	no	#N/A	0
828	Hpan_g8554.t1	Adami_g14176.t1	PHAVENT1A016209P1	Petfic_v00_mik.OX345643.1G291.1	Choren_v00_mik.OX359192.1G800.1	Osclob_v00_mik.OX382151.1G1065.1	2	3864274	3864960	1219	4	5990208	5992440	968	8	1939558	1944047	345	16	678421	681720	169	6	8501473	8504371	1249	17	5399189	5400343	1024	d	0	0	0	0	0	0	no	#N/A	0
829	Hpan_g8575.t1	Adami_g14209.t1	PHAVENT1A002929P1	Petfic_v00_mik.OX345643.1G274.1	Choren_v00_mik.OX359192.1G1345.1	Osclob_v00_mik.OX382156.1G171.1	7	648967	649419	202	4	8660278	8661245	1602	8	1832485	1834027	324	16	300081	301155	100	6	8996603	8997478	1292	17	5475239	5475802	1047	0	0	0	0	0	0	0	no	#N/A	0
830	Hpan_g8621.t1	Adami_g14239.t1	PHAVENT1A015292P1	Petfic_v00_mik.OX345643.1G111.1	Choren_v00_mik.OX359192.1G1212.1	Osclob_v00_mik.OX382151.1G78.1	2	281824	282345	97	4	7954245	7954781	1440	8	443114	444094	129	16	167181	168198	67	6	9217743	9218710	1333	17	5712707	5713304	1100	d	0	0	0	0	0	0	no	#N/A	0
831	Hpan_g8624.t1	Adami_g14242.t1	PHAVENT1A018536P1	Petfic_v00_mik.OX345643.1G172.1	Choren_v00_mik.OX359192.1G978.1	Osclob_v00_mik.OX382151.1G254.1	2	834110	839358	278	4	6750425	6769360	1164	8	861862	880731	199	16	173145	181650	71	6	9223806	9233937	1337	17	5718080	5722232	1103	d	0	0	0	0	0	0	no	#N/A	0
833	Hpan_g8630.t1	Adami_g11855.t1	PHAVENT1A020653P1	Petfic_v00_mik.OX345640.1G104.1	Choren_v00_mik.OX359197.1G759.1	Osclob_v00_mik.OX382156.1G927.1	7	3454160	3461234	1071	9	5785081	5794411	892	5	681405	695156	135	6	7236015	7247666	882	5	1848090	1860984	193	2	2612	10807	3	0	0	0	0	0	0	0	no	#N/A	0
834	Hpan_g8653.t1	Adami_g12102.t1	PHAVENT1A008587P3	Petfic_v00_mik.OX345640.1G284.1	Choren_v00_mik.OX359199.1G1021.1	Osclob_v00_mik.OX382152.1G116.1	3	360231	361780	131	11	6917937	6920006	1217	5	1861838	1866536	339	6	4533272	4545904	481	5	4230626	4236178	487	2	113263	115493	33	b	0	0	0	0	0	0	no	#N/A	0
835	Hpan_g8658.t1	Adami_g12077.t1	PHAVENT1A019757P1	Petfic_v00_mik.OX345640.1G537.1	Choren_v00_mik.OX359199.1G1070.1	Osclob_v00_mik.OX382152.1G175.1	3	606913	609156	209	11	7129058	7134476	1274	5	4123350	4136498	642	6	4763052	4778519	508	5	3934930	3946870	455	2	125812	130602	39	b	0	0	0	0	0	0	no	#N/A	0
836	Hpan_g8660.t1	Adami_g11739.t1	PHAVENT1A005636P1	Petfic_v00_mik.OX345640.1G132.1	Choren_v00_mik.OX359197.1G789.1	Osclob_v00_mik.OX382150.1G107.1	1	359300	359580	135	9	5914063	5915867	923	5	821657	821977	164	6	7744262	7745840	978	5	383826	384238	55	2	137257	137515	41	0	0	0	0	0	0	0	no	#N/A	0
837	Hpan_g8675.t1	Adami_g12089.t1	PHAVENT1A005248P1	Petfic_v00_mik.OX345640.1G89.1	Choren_v00_mik.OX359199.1G404.1	Osclob_v00_mik.OX382152.1G171.1	3	550806	552748	193	11	2529464	2533493	498	5	546957	552109	102	6	4660531	4666849	495	5	4095908	4102058	471	2	229904	232448	59	b	0	0	0	0	0	0	no	#N/A	0
838	Hpan_g8679.t1	Adami_g12067.t1	PHAVENT1A012023P1	Petfic_v00_mik.OX345640.1G533.1	Choren_v00_mik.OX359199.1G1071.1	Osclob_v00_mik.OX382152.1G152.1	3	503986	505637	175	11	7142778	7145441	1277	5	4044618	4051630	638	6	4930627	4936785	525	5	3871567	3877742	443	2	249828	253161	64	b	0	0	0	0	0	0	no	#N/A	0
839	Hpan_g8683.t1	Adami_g12364.t1	PHAVENT1A021399P1	Petfic_v00_mik.OX345640.1G578.1	Choren_v00_mik.OX359199.1G870.1	Osclob_v00_mik.OX382152.1G60.1	3	237241	238110	80	11	6168298	6170348	1036	5	4538337	4544092	691	6	1221819	1224686	169	5	7658892	7663555	806	2	262541	263544	69	b	0	0	0	0	0	0	no	#N/A	0
840	Hpan_g8693.t1	Adami_g12386.t1	PHAVENT1A017846P1	Petfic_v00_mik.OX345640.1G575.1	Choren_v00_mik.OX359199.1G746.1	Osclob_v00_mik.OX382152.1G364.1	3	1159721	1161818	421	11	5381707	5384991	885	5	4523339	4535135	690	6	1308863	1322951	183	5	7950240	7963409	838	2	305886	308414	82	b	0	0	0	0	0	0	no	#N/A	0
841	Hpan_g8707.t1	Adami_g11912.t1	PHAVENT1A004472P1	Petfic_v00_mik.OX345640.1G395.1	Choren_v00_mik.OX359199.1G1167.1	Osclob_v00_mik.OX382152.1G167.1	3	508298	510187	178	11	7508586	7511111	1383	5	2713138	2721782	470	6	6187191	6195096	705	5	2401230	2411671	265	2	359800	363119	97	b	0	0	0	0	0	0	no	#N/A	0
842	Hpan_g8708.t1	Adami_g11911.t1	PHAVENT1A021542P1	Petfic_v00_mik.OX345640.1G393.1	Choren_v00_mik.OX359199.1G1120.1	Osclob_v00_mik.OX382152.1G154.1	3	510282	513846	179	11	7356647	7360781	1336	5	2721977	2732434	471	6	6178813	6187144	704	5	2394903	2401117	264	2	363277	367764	98	b	0	0	0	0	0	0	no	#N/A	0
843	Hpan_g8715.t1	Adami_g11975.t1	PHAVENT1A004834P1	Petfic_v00_mik.OX345640.1G969.1	Choren_v00_mik.OX359199.1G1055.1	Osclob_v00_mik.OX382152.1G190.1	3	611956	613823	211	11	7075044	7080597	1261	5	8091272	8095833	1141	6	5960090	5966884	664	5	3041958	3047118	334	2	391605	395483	107	b	0	0	0	0	0	0	no	#N/A	0
844	Hpan_g8722.t1	Adami_g11961.t1	PHAVENT1A017042P1	Petfic_v00_mik.OX345640.1G446.1	Choren_v00_mik.OX359199.1G955.1	Osclob_v00_mik.OX382152.1G39.1	3	139525	144041	43	11	6535469	6539474	1133	5	3265632	3278684	530	6	5990563	6003922	669	5	2936427	2946971	316	2	409588	413547	114	b	0	0	0	0	0	0	no	#N/A	0
845	Hpan_g8747.t1	Adami_g11836.t1	PHAVENT1A020924P1	Petfic_v00_mik.OX345640.1G874.1	Choren_v00_mik.OX359199.1G1079.1	Osclob_v00_mik.OX382152.1G7.1	3	56265	56722	8	11	7196864	7197538	1292	5	7562079	7565809	1026	6	7169784	7171517	857	5	1722233	1724722	166	2	518759	519381	144	b	0	0	0	0	0	0	no	#N/A	0
846	Hpan_g8758.t1	Adami_g7215.t1	PHAVENT1A022258P1	Petfic_v00_mik.OX345641.1G996.1	Choren_v00_mik.OX359195.1G862.1	Osclob_v00_mik.OX382167.1G279.1	18	866904	868297	298	7	6376527	6379814	996	6	7918543	7920807	1165	5	7297962	7301302	842	2	6768893	6773522	901	2	568267	570131	158	g	0	0	0	0	0	0	no	#N/A	0
847	Hpan_g8775.t1	Adami_g7593.t1	PHAVENT1A000067P1	Petfic_v00_mik.OX345641.1G947.1	Choren_v00_mik.OX359195.1G843.1	Osclob_v00_mik.OX382167.1G64.1	18	190836	191356	75	7	6310368	6311138	972	6	7664197	7665637	1108	5	6358582	6361838	714	2	12184460	12187837	1327	2	629070	629665	177	g	0	0	0	0	0	0	no	#N/A	0
848	Hpan_g8782.t1	Adami_g7580.t1	PHAVENT1A009287P1	Petfic_v00_mik.OX345641.1G953.1	Choren_v00_mik.OX359195.1G861.1	Osclob_v00_mik.OX382167.1G13.1	18	54415	55931	21	7	6373737	6376345	995	6	7712860	7715939	1121	5	6583842	6588468	739	2	11981669	12009815	1308	2	641841	644727	184	g	0	0	0	0	0	0	no	#N/A	0
849	Hpan_g8802.t1	Adami_g7653.t1	PHAVENT1A013518P1	Petfic_v00_mik.OX345641.1G1017.1	Choren_v00_mik.OX359195.1G887.1	Osclob_v00_mik.OX382167.1G17.1	18	48721	50605	19	7	6457901	6459325	1019	6	7998753	8000486	1187	5	5665455	5672481	638	2	13023284	13029540	1397	2	729810	731249	207	g	0	0	0	0	0	0	no	#N/A	0
851	Hpan_g8834.t1	Adami_g7685.t1	PHAVENT1A004558P1	Petfic_v00_mik.OX345641.1G991.1	Choren_v00_mik.OX359195.1G863.1	Osclob_v00_mik.OX382167.1G290.1	18	920258	924503	315	7	6382815	6396164	998	6	7878958	7890607	1157	5	7546630	7557763	894	2	13401776	13418533	1440	2	841672	851803	242	g	0	0	0	0	0	0	no	#N/A	0
853	Hpan_g8858.t1	Adami_g7531.t1	PHAVENT1A015395P1	Petfic_v00_mik.OX345641.1G11.1	Choren_v00_mik.OX359195.1G996.1	Osclob_v00_mik.OX382167.1G126.1	18	337899	339517	142	7	6994227	6999992	1151	6	73045	75503	13	5	487851	497462	122	2	11169199	11186515	1254	2	958087	961784	278	g	0	0	0	0	0	0	no	#N/A	0
854	Hpan_g8876.t1	Adami_g11803.t1	PHAVENT1A019742P1	Petfic_v00_mik.OX345640.1G295.1	Choren_v00_mik.OX359199.1G1088.1	Osclob_v00_mik.OX382152.1G34.1	3	114248	115072	33	11	7208096	7209408	1295	5	1939102	1940922	359	6	7379350	7381647	900	5	1556629	1558650	129	2	1040165	1041343	296	b	0	0	0	0	0	0	no	#N/A	0
855	Hpan_g8879.t1	Adami_g11924.t1	PHAVENT1A020124P2	Petfic_v00_mik.OX345640.1G346.1	Choren_v00_mik.OX359199.1G1196.1	Osclob_v00_mik.OX382152.1G220.1	3	707830	718802	244	11	7606183	7615297	1414	5	2394734	2429764	413	6	6476049	6485753	743	5	2563167	2583744	277	2	1044070	1065548	300	b	0	0	0	0	0	0	no	#N/A	0
856	Hpan_g8890.t1	Adami_g11942.t1	PHAVENT1A012593P1	Petfic_v00_mik.OX345640.1G343.1	Choren_v00_mik.OX359199.1G1149.1	Osclob_v00_mik.OX382152.1G139.1	3	489808	493738	170	11	7461565	7466736	1361	5	2359955	2369459	410	6	6647674	6657590	766	5	2783435	2789877	296	2	1122623	1126302	313	b	0	0	0	0	0	0	no	#N/A	0
857	Hpan_g8891.t1	Adami_g11943.t1	PHAVENT1A003758P1	Petfic_v00_mik.OX345640.1G344.1	Choren_v00_mik.OX359199.1G1138.1	Osclob_v00_mik.OX382152.1G169.1	3	528805	531423	188	11	7466861	7468621	1362	5	2356586	2359840	409	6	6657630	6663155	767	5	2790100	2793062	297	2	1126523	1128423	314	b	0	0	0	0	0	0	no	#N/A	0
859	Hpan_g8953.t1	Adami_g11983.t1	PHAVENT1A005439P1	Petfic_v00_mik.OX345640.1G998.1	Choren_v00_mik.OX359199.1G943.1	Osclob_v00_mik.OX382152.1G335.1	3	1052092	1052435	387	11	6529963	6530410	1130	5	8310548	8310890	1177	6	5882154	5883360	650	5	3123227	3124377	343	2	1434645	1435195	388	b	0	0	0	0	0	0	no	#N/A	0
860	Hpan_g8954.t1	Adami_g11984.t1	PHAVENT1A012311P1	Petfic_v00_mik.OX345640.1G996.1	Choren_v00_mik.OX359199.1G1035.1	Osclob_v00_mik.OX382152.1G36.1	3	122329	131150	39	11	6967776	6975516	1236	5	8311437	8320355	1178	6	5870212	5882129	649	5	3124528	3133128	344	2	1435342	1439620	389	b	0	0	0	0	0	0	no	#N/A	0
861	Hpan_g8963.t1	Adami_g11882.t1	PHAVENT1A013929P1	Petfic_v00_mik.OX345640.1G216.1	Choren_v00_mik.OX359199.1G968.1	Osclob_v00_mik.OX382152.1G242.1	3	751706	754312	267	11	6667445	6670114	1163	5	1366324	1372480	257	6	6812100	6820590	798	5	2110528	2116758	231	2	1463381	1465689	400	b	0	0	0	0	0	0	no	#N/A	0
863	Hpan_g8978.t1	Adami_g4525.t1	PHAVENT1A010698P1	Petfic_v00_mik.OX345648.1G82.1	Choren_v00_mik.OX359190.1G142.1	Osclob_v00_mik.OX382161.1G414.1	12	1722036	1724804	484	2	701272	704520	166	13	381871	398634	93	17	5832471	5845963	529	12	4258735	4263744	615	2	1528109	1530348	417	f	0	0	0	0	0	0	no	#N/A	0
865	Hpan_g9041.t1	Adami_g12195.t1	PHAVENT1A023004P1	Petfic_v00_mik.OX345640.1G1021.1	Choren_v00_mik.OX359199.1G729.1	Osclob_v00_mik.OX382166.1G284.1	NA	920261	922989	329	11	5329614	5332815	867	5	8442044	8446002	1207	6	219117	227332	38	5	5130638	5141661	607	2	1853460	1858159	493	0	0	0	0	0	0	0	no	#N/A	0
866	Hpan_g9054.t1	Adami_g12127.t1	PHAVENT1A006462P1	Petfic_v00_mik.OX345640.1G75.1	Choren_v00_mik.OX359202.1G445.1	Osclob_v00_mik.OX382152.1G141.1	3	452555	454049	155	14	2407025	2414979	535	5	473015	478556	86	6	4199629	4204810	442	5	4450744	4455328	521	2	1914313	1916146	509	0	0	0	0	0	0	0	no	#N/A	0
867	Hpan_g9057.t1	Adami_g11851.t1	PHAVENT1A020064P1	Petfic_v00_mik.OX345640.1G36.1	Choren_v00_mik.OX359199.1G753.1	Osclob_v00_mik.OX382162.1G90.1	13	222437	226052	98	11	5404736	5407084	894	5	179815	182473	37	6	7051012	7055375	834	5	1829436	1833305	186	2	1918473	1920695	512	b	0	0	0	0	0	0	no	#N/A	0
868	Hpan_g9080.t1	Adami_g12467.t1	PHAVENT1A011894P1	Petfic_v00_mik.OX345640.1G40.1	Choren_v00_mik.OX359199.1G1027.1	Osclob_v00_mik.OX382168.1G420.1	19	1899237	1900850	500	11	6930288	6938494	1222	5	232132	242596	46	6	3629525	3653392	393	5	9941697	9979022	932	2	2086790	2091266	537	0	0	0	0	0	0	0	no	#N/A	0
869	Hpan_g9090.t1	Adami_g12133.t1	PHAVENT1A010106P1	Petfic_v00_mik.OX345640.1G335.1	Choren_v00_mik.OX359199.1G886.1	Osclob_v00_mik.OX382152.1G365.1	3	1162043	1164780	422	11	6271040	6275478	1066	5	2318390	2330323	402	6	3879126	3887677	416	5	4521220	4532561	528	2	2128942	2135232	547	b	0	0	0	0	0	0	no	#N/A	0
870	Hpan_g9110.t1	Adami_g11921.t1	PHAVENT1A005718P1	Petfic_v00_mik.OX345640.1G347.1	Choren_v00_mik.OX359199.1G972.1	Osclob_v00_mik.OX382152.1G151.1	3	498464	500462	173	11	6641965	6646242	1155	5	2434902	2440415	415	6	6422346	6434285	736	5	2528839	2534190	274	2	2250922	2255610	567	b	0	0	0	0	0	0	no	#N/A	0
871	Hpan_g9132.t1	Adami_g12179.t1	PHAVENT1A002184P1	Petfic_v00_mik.OX345640.1G1013.1	Choren_v00_mik.OX359199.1G872.1	Osclob_v00_mik.OX382150.1G385.1	1	1358721	1361303	448	11	6197406	6206594	1045	5	8384089	8389941	1194	6	92897	98109	20	5	5010548	5016231	587	2	2415952	2423083	594	0	0	0	0	0	0	0	no	#N/A	0
876	Hpan_g9193.t1	Adami_g7336.t1	PHAVENT1A015487P1	Petfic_v00_mik.OX345641.1G48.1	Choren_v00_mik.OX359195.1G1131.1	Osclob_v00_mik.OX382167.1G244.1	18	772028	776092	263	7	7767267	7783702	1307	6	264794	291356	58	5	2290068	2347568	386	2	8320216	8356243	1035	2	2849291	2862138	664	g	0	0	0	0	0	0	no	#N/A	0
877	Hpan_g9200.t1	Adami_g7305.t1	PHAVENT1A016661P1	Petfic_v00_mik.OX345641.1G132.1	Choren_v00_mik.OX359195.1G1092.1	Osclob_v00_mik.OX382167.1G122.1	18	310317	312390	133	7	7547237	7552383	1267	6	793057	798236	158	5	1931711	1937504	336	2	7930518	7939117	1000	2	2884750	2889103	672	g	0	0	0	0	0	0	no	#N/A	0
882	Hpan_g9283.t1	Adami_g11764.t1	PHAVENT1A012985P1	Petfic_v00_mik.OX345640.1G111.1	Choren_v00_mik.OX359199.1G1173.1	Osclob_v00_mik.OX382152.1G253.1	3	801874	803326	289	11	7537002	7538686	1389	5	695689	701237	136	6	7604440	7606440	941	5	503560	507085	82	2	5104230	5109724	772	b	0	0	0	0	0	0	no	#N/A	0
883	Hpan_g9293.t1	Adami_g11723.t1	PHAVENT1A022823P1	Petfic_v00_mik.OX345640.1G118.1	Choren_v00_mik.OX359199.1G1115.1	Osclob_v00_mik.OX382161.1G15.1	12	87275	87643	19	11	7337059	7337715	1329	5	743242	743629	146	6	7797175	7799119	993	5	248793	249559	33	2	5184772	5187790	786	0	0	0	0	0	0	0	no	#N/A	0
884	Hpan_g9296.t1	Adami_g11720.t1	PHAVENT1A014116P1	Petfic_v00_mik.OX345640.1G116.1	Choren_v00_mik.OX359199.1G1148.1	Osclob_v00_mik.OX382152.1G354.1	3	1082181	1086563	402	11	7456145	7461377	1360	5	724157	733191	142	6	7809571	7813120	997	5	217801	229355	30	2	5193937	5203884	789	b	0	0	0	0	0	0	no	#N/A	0
885	Hpan_g9299.t1	Adami_g11718.t1	PHAVENT1A019623P1	Petfic_v00_mik.OX345640.1G117.1	Choren_v00_mik.OX359199.1G1185.1	Osclob_v00_mik.OX382152.1G201.1	3	651314	652155	225	11	7538706	7540114	1390	5	734976	738068	144	6	7817766	7819503	1001	5	211729	214253	28	2	5206727	5208017	792	b	0	0	0	0	0	0	no	#N/A	0
886	Hpan_g9305.t1	Adami_g11825.t1	PHAVENT1A019502P1	Petfic_v00_mik.OX345640.1G759.1	Choren_v00_mik.OX359199.1G1057.1	Osclob_v00_mik.OX382152.1G200.1	3	648304	650819	223	11	7084735	7088264	1262	5	6467022	6477343	902	6	7199526	7207950	875	5	1670099	1675824	154	2	5227547	5231891	799	b	0	0	0	0	0	0	no	#N/A	0
887	Hpan_g9311.t1	Adami_g11857.t1	PHAVENT1A015180P1	Petfic_v00_mik.OX345640.1G90.1	Choren_v00_mik.OX359199.1G1112.1	Osclob_v00_mik.OX382152.1G282.1	3	842230	846636	314	11	7313743	7317098	1321	5	563995	568947	105	6	7256023	7260999	884	5	1879105	1885272	196	2	5267275	5273103	806	b	0	0	0	0	0	0	no	#N/A	0
888	Hpan_g9340.t1	Adami_g12012.t1	PHAVENT1A008859P1	Petfic_v00_mik.OX345640.1G889.1	Choren_v00_mik.OX359199.1G1058.1	Osclob_v00_mik.OX382152.1G374.1	3	1168969	1170378	426	11	7089080	7090686	1264	5	7665085	7671219	1043	6	5507579	5512221	600	5	3337260	3340806	377	2	5580048	5593610	837	b	0	0	0	0	0	0	no	#N/A	0
889	Hpan_g9363.t1	Adami_g11709.t1	PHAVENT1A015994P1	Petfic_v00_mik.OX345640.1G600.1	Choren_v00_mik.OX359199.1G773.1	Osclob_v00_mik.OX382152.1G215.1	3	703740	706830	242	11	5560256	5563721	921	5	4712208	4729165	718	6	7838140	7841830	1012	5	177690	182902	18	2	5853357	5859704	864	b	0	0	0	0	0	0	no	#N/A	0
890	Hpan_g9364.t1	Adami_g11707.t1	PHAVENT1A018856P1	Petfic_v00_mik.OX345640.1G155.1	Choren_v00_mik.OX359199.1G1006.1	Osclob_v00_mik.OX382152.1G117.1	3	362509	364197	132	11	6838852	6840317	1195	5	1019201	1020885	189	6	7844748	7846040	1014	5	172807	174142	16	2	5860583	5862017	865	b	0	0	0	0	0	0	no	#N/A	0
891	Hpan_g9365.t1	Adami_g11706.t1	PHAVENT1A000518P1	Petfic_v00_mik.OX345640.1G150.1	Choren_v00_mik.OX359199.1G1001.1	Osclob_v00_mik.OX382151.1G797.1	2	2972043	2975356	939	11	6829773	6838286	1194	5	1010261	1018968	188	6	7847175	7852461	1015	5	156790	171766	15	2	5862955	5872617	866	0	0	0	0	0	0	0	no	#N/A	0
893	Hpan_g9421.t1	Adami_g12042.t1	PHAVENT1A012989P1	Petfic_v00_mik.OX345640.1G649.1	Choren_v00_mik.OX359199.1G1134.1	Osclob_v00_mik.OX382152.1G161.1	3	531537	545505	189	11	7442728	7446079	1354	5	5168399	5207676	777	6	5195589	5214220	563	5	3618358	3627938	411	2	6270089	6275298	933	b	0	0	0	0	0	0	no	#N/A	0
894	Hpan_g9422.t1	Adami_g12041.t1	PHAVENT1A004943P1	Petfic_v00_mik.OX345642.1G368.1	Choren_v00_mik.OX359199.1G1066.1	Osclob_v00_mik.OX382152.1G142.1	3	456265	458685	157	11	7100713	7104959	1269	7	2280757	2295880	425	6	5214317	5224618	564	5	3608160	3618216	410	2	6275458	6281054	934	b	0	0	0	0	0	0	no	#N/A	0
895	Hpan_g9443.t1	Adami_g12055.t1	PHAVENT1A000866P1	Petfic_v00_mik.OX345640.1G565.1	Choren_v00_mik.OX359199.1G949.1	Osclob_v00_mik.OX382159.1G344.1	10	1224980	1228728	393	11	6565426	6571686	1144	5	4371451	4385948	670	6	5047001	5064159	540	5	3721912	3731650	429	2	6386670	6393245	958	0	0	0	0	0	0	0	no	#N/A	0
899	Hpan_g9596.t1	Adami_g7772.t1	PHAVENT1A019362P1	Petfic_v00_mik.OX345641.1G660.1	Choren_v00_mik.OX359195.1G1256.1	Osclob_v00_mik.OX382167.1G330.1	18	1043105	1049630	355	7	8357090	8359789	1477	6	5308168	5345471	770	5	1202579	1215746	235	2	15071864	15090209	1545	2	7163023	7169324	1134	g	0	0	0	0	0	0	no	#N/A	0
904	Hpan_g9653.t1	Adami_g7734.t1	PHAVENT1A003540P1	Petfic_v00_mik.OX345636.1G3743.1	Choren_v00_mik.OX359195.1G944.1	Osclob_v00_mik.OX382167.1G34.1	18	109494	111029	39	7	6740613	6744035	1088	1	30294778	30303091	4155	5	910135	913147	199	2	14038779	14045931	1498	2	7454852	7457335	1198	g	0	0	0	0	0	0	no	#N/A	0
905	Hpan_g9663.t1	Adami_g7228.t1	PHAVENT1A019573P1	Petfic_v00_mik.OX345642.1G636.1	Choren_v00_mik.OX359195.1G811.1	Osclob_v00_mik.OX382167.1G92.1	18	241085	241625	102	7	6180223	6180787	932	7	5092063	5093533	743	5	7253591	7257232	832	2	6871585	6873702	915	2	7494175	7494649	1210	g	0	0	0	0	0	0	no	#N/A	0
910	Hpan_g9689.t1	Adami_g7710.t1	PHAVENT1A014185P1	Petfic_v00_mik.OX345641.1G920.1	Choren_v00_mik.OX359195.1G919.1	Osclob_v00_mik.OX382167.1G3.1	18	14391	18156	5	7	6640347	6642189	1061	6	7491549	7497473	1071	5	4370701	4374084	540	2	13804366	13809262	1470	2	7602542	7604256	1240	g	0	0	0	0	0	0	no	#N/A	0
912	Hpan_g9707.t1	Adami_g7166.t1	PHAVENT1A002979P1	Petfic_v00_mik.OX345641.1G414.1	Choren_v00_mik.OX359195.1G906.1	Osclob_v00_mik.OX382167.1G130.1	18	335117	337570	141	7	6569071	6578669	1042	6	3071864	3078024	490	5	1727028	1733149	313	2	6135280	6150983	840	2	7680013	7684016	1261	g	0	0	0	0	0	0	no	#N/A	0
913	Hpan_g9708.t1	Adami_g7283.t1	PHAVENT1A021432P1	Petfic_v00_mik.OX345641.1G407.1	Choren_v00_mik.OX359195.1G874.1	Osclob_v00_mik.OX382157.1G11.1	8	79653	82741	16	7	6411669	6414838	1009	6	3036889	3039594	481	5	1757238	1758880	317	2	7584142	7588782	976	2	7684590	7685604	1262	0	0	0	0	0	0	0	no	#N/A	0
914	Hpan_g9719.t1	Adami_g7273.t1	PHAVENT1A011187P1	Petfic_v00_mik.OX345641.1G923.1	Choren_v00_mik.OX359195.1G829.1	Osclob_v00_mik.OX382167.1G253.1	18	827058	828037	276	7	6230837	6232387	950	6	7505948	7508891	1076	5	7308268	7311139	844	2	7378703	7389561	966	2	7733901	7735173	1276	g	0	0	0	0	0	0	no	#N/A	0
915	Hpan_g9742.t1	Adami_g7204.t1	PHAVENT1A007711P1	Petfic_v00_mik.OX345641.1G481.1	Choren_v00_mik.OX359195.1G1103.1	Osclob_v00_mik.OX382167.1G205.1	18	621752	622467	230	7	7606341	7616486	1281	6	3600958	3626606	570	5	1370934	1380404	259	2	6679949	6694775	885	2	7949739	7953306	1304	g	0	0	0	0	0	0	no	#N/A	0
917	Hpan_g9765.t1	Adami_g11712.t1	PHAVENT1A001496P1	Petfic_v00_mik.OX345640.1G187.1	Choren_v00_mik.OX359196.1G521.1	Osclob_v00_mik.OX382154.1G407.1	5	1351073	1351994	470	8	4393876	4396823	618	5	1198817	1200828	224	6	7831771	7833919	1009	5	191324	193665	21	2	8053556	8059261	1328	0	0	0	0	0	0	0	no	#N/A	0
918	Hpan_g9770.t1	Adami_g11741.t1	PHAVENT1A012447P1	Petfic_v00_mik.OX345640.1G129.1	Choren_v00_mik.OX359199.1G999.1	Osclob_v00_mik.OX382152.1G193.1	3	630781	633642	218	11	6815360	6817573	1192	5	801420	803751	161	6	7718648	7720811	973	5	388003	389609	57	2	8083812	8085806	1333	b	0	0	0	0	0	0	no	#N/A	0
919	Hpan_g9780.t1	Adami_g11752.t1	PHAVENT1A022222P2	Petfic_v00_mik.OX345640.1G98.1	Choren_v00_mik.OX359199.1G998.1	Osclob_v00_mik.OX382152.1G249.1	3	788336	790175	281	11	6811007	6814057	1190	5	603904	607930	114	6	7659169	7663235	956	5	451429	454664	69	2	8123604	8126435	1343	b	0	0	0	0	0	0	no	#N/A	0
920	Hpan_g9788.t1	Adami_g7132.t1	PHAVENT1A023572P1	Petfic_v00_mik.OX345641.1G323.1	Choren_v00_mik.OX359195.1G1120.1	Osclob_v00_mik.OX382167.1G215.1	18	633448	634685	236	7	7671655	7673543	1296	6	2219873	2231892	390	5	291122	293490	84	2	5932415	5937572	800	2	8164509	8166424	1353	g	0	0	0	0	0	0	no	#N/A	0
921	Hpan_g9794.t1	Adami_g7117.t1	PHAVENT1A019958P1	Petfic_v00_mik.OX345641.1G236.1	Choren_v00_mik.OX359195.1G1093.1	Osclob_v00_mik.OX382167.1G312.1	18	1010158	1012444	340	7	7552547	7561107	1268	6	1576659	1581469	289	5	171013	177377	62	2	5809504	5814410	777	2	8173153	8176480	1362	g	0	0	0	0	0	0	no	#N/A	0
922	Hpan_g9840.t1	Adami_g7385.t1	PHAVENT1A000440P1	Petfic_v00_mik.OX345641.1G130.1	Choren_v00_mik.OX359195.1G1266.1	Osclob_v00_mik.OX382167.1G80.1	18	208129	209353	82	7	8335127	8336137	1472	6	810326	814234	163	5	3194676	3201220	450	2	9022252	9042996	1094	2	8320832	8321841	1412	g	0	0	0	0	0	0	no	#N/A	0
923	Hpan_g9843.t1	Adami_g7129.t1	PHAVENT1A019795P1	Petfic_v00_mik.OX345641.1G279.1	Choren_v00_mik.OX359195.1G1189.1	Osclob_v00_mik.OX382167.1G233.1	18	750223	752234	253	7	8068361	8071754	1391	6	1868414	1880002	339	5	256297	261005	77	2	5906516	5910544	797	2	8332895	8335237	1416	g	0	0	0	0	0	0	no	#N/A	0
925	Hpan_g9846.t1	Adami_g7119.t1	PHAVENT1A021458P1	Petfic_v00_mik.OX345641.1G240.1	Choren_v00_mik.OX359196.1G497.1	Osclob_v00_mik.OX382167.1G159.1	18	421210	421985	172	8	4274780	4275778	588	6	1622671	1626495	296	5	202507	204464	66	2	5853095	5854201	779	2	8341324	8342504	1419	0	0	0	0	0	0	0	no	#N/A	0
926	Hpan_g9847.t1	Adami_g7120.t1	PHAVENT1A021770P1	Petfic_v00_mik.OX345641.1G281.1	Choren_v00_mik.OX359195.1G1065.1	Osclob_v00_mik.OX382167.1G305.1	18	951106	953114	323	7	7438418	7443369	1233	6	1888892	1893219	341	5	205318	214910	67	2	5854661	5864104	780	2	8342900	8345431	1420	g	0	0	0	0	0	0	no	#N/A	0
927	Hpan_g9851.t1	Adami_g7419.t1	PHAVENT1A013025P1	Petfic_v00_mik.OX345641.1G262.1	Choren_v00_mik.OX359195.1G937.1	Osclob_v00_mik.OX382167.1G243.1	18	767254	768139	261	7	6713666	6716233	1081	6	1750696	1755270	319	5	92140	93955	38	2	9656045	9660120	1130	2	8356740	8358130	1424	g	0	0	0	0	0	0	no	#N/A	0
928	Hpan_g9853.t1	Adami_g7426.t1	PHAVENT1A021600P1	Petfic_v00_mik.OX345641.1G319.1	Choren_v00_mik.OX359195.1G1246.1	Osclob_v00_mik.OX382167.1G235.1	18	764796	765814	258	7	8299919	8300995	1459	6	2202188	2204616	386	5	97691	99486	40	2	9699671	9705480	1138	2	8362389	8363309	1426	g	0	0	0	0	0	0	no	#N/A	0
929	Hpan_g9870.t1	Adami_g7138.t1	PHAVENT1A006534P1	Petfic_v00_mik.OX345641.1G260.1	Choren_v00_mik.OX359195.1G1183.1	Osclob_v00_mik.OX382167.1G251.1	18	819642	820749	273	7	7962752	7964871	1375	6	1722265	1726283	314	5	144915	146757	51	2	5978795	5983243	809	2	8413714	8415018	1447	g	0	0	0	0	0	0	no	#N/A	0
930	Hpan_g9884.t1	Adami_g12354.t1	PHAVENT1A001326P1	Petfic_v00_mik.OX345640.1G923.1	Choren_v00_mik.OX359192.1G256.1	Osclob_v00_mik.OX382152.1G245.1	3	766879	768068	273	4	1622558	1629494	324	5	7796566	7800705	1083	6	1146343	1149627	163	5	7532591	7534665	796	2	8479946	8481409	1465	0	0	0	0	0	0	0	no	#N/A	0
931	Hpan_g9885.t1	Adami_g11277.t1	PHAVENT1A019932P1	Petfic_v00_mik.OX345639.1G468.1	Choren_v00_mik.OX359201.1G121.1	Osclob_v00_mik.OX382153.1G1038.1	4	3612056	3612621	1179	13	568322	570064	138	4	3224455	3226294	545	24	4863000	4864934	681	4	15883941	15886273	1529	2	8481566	8482226	1466	a	0	0	0	0	0	0	no	#N/A	0
932	Hpan_g9887.t1	Adami_g12344.t1	PHAVENT1A021099P1	Petfic_v00_mik.OX345643.1G612.1	Choren_v00_mik.OX359199.1G743.1	Osclob_v00_mik.OX382157.1G453.1	8	1961590	1964707	536	11	5360730	5363224	879	8	5572607	5581256	734	6	903856	910983	143	5	7378372	7391305	783	2	8488622	8491008	1468	0	0	0	0	0	0	0	no	#N/A	0
935	Hpan_g9896.t1	Adami_g12350.t1	PHAVENT1A004154P1	Petfic_v00_mik.OX345642.1G361.1	Choren_v00_mik.OX359199.1G740.1	Osclob_v00_mik.OX382152.1G243.1	3	754465	757226	268	11	5374200	5379383	883	7	2265773	2272760	421	6	1026579	1035543	155	5	7485515	7490381	791	2	8530467	8535298	1477	b	0	0	0	0	0	0	no	#N/A	0
936	Hpan_g9906.t1	Adami_g11844.t1	PHAVENT1A003927P1	Petfic_v00_mik.OX345649.1G254.1	Choren_v00_mik.OX359199.1G1095.1	Osclob_v00_mik.OX382152.1G37.1	3	131410	135783	40	11	7261144	7263687	1307	14	1521314	1530665	311	6	7135125	7139759	848	5	1757322	1762052	178	2	8571130	8575610	1488	b	0	0	0	0	0	0	no	#N/A	0
937	Hpan_g9919.t1	Adami_g5582.t1	PHAVENT1A019752P1	Petfic_v00_mik.OX345647.1G102.1	Choren_v00_mik.OX359196.1G780.1	Osclob_v00_mik.OX382152.1G361.1	3	1136215	1138083	416	8	5674687	5677540	941	12	751944	755377	124	10	6934534	6937938	832	13	7261633	7280360	598	3	9070	11029	6	0	0	0	0	0	0	0	hpan	EI2BG	0
938	Hpan_g9931.t1	Adami_g16537.t1	PHAVENT1A019043P1	Petfic_v00_mik.OX345636.1G321.1	Choren_v00_mik.OX359195.1G66.1	Osclob_v00_mik.OX382168.1G223.1	19	1112023	1112570	266	7	463716	465446	75	1	3070974	3076339	343	12	296097	297757	69	9	193850	195257	24	3	53885	54517	18	g	0	0	0	0	0	0	no	#N/A	0
939	Hpan_g9942.t1	Adami_g17143.t1	PHAVENT1A016102P1	Petfic_v00_mik.OX345636.1G2012.1	Choren_v00_mik.OX359195.1G276.1	Osclob_v00_mik.OX382168.1G261.1	19	1299265	1300296	310	7	1832413	1837086	328	1	18622117	18645582	2269	12	1063887	1067021	193	9	9274752	9281525	723	3	259470	261419	29	g	0	0	0	0	0	0	no	#N/A	0
941	Hpan_g9998.t1	Adami_g16527.t1	PHAVENT1A009255P1	Petfic_v00_mik.OX345636.1G501.1	Choren_v00_mik.OX359195.1G573.1	Osclob_v00_mik.OX382168.1G212.1	19	1104501	1105909	260	7	4632747	4643412	652	1	4490898	4503456	538	12	318416	323090	74	9	129027	133464	12	3	625361	627544	98	g	0	0	0	0	0	0	no	#N/A	0
105	Hpan_g12234.t1	Adami_g15155.t1	PHAVENT1A003905P1	Petfic_v00_mik.OX345636.1G2203.1	Choren_v00_mik.OX359197.1G663.1	Osclob_v00_mik.OX382156.1G70.1	7	294407	300351	86	9	5137871	5157111	778	1	19984598	20013075	2482	18	4622506	4664931	473	7	4437341	4495393	434	5	4990304	5020849	584	0	1	0	0	0	0	0	osc	BROMI	1
143	Hpan_g13173.t1	Adami_g873.t1	PHAVENT1A012138P1	Petfic_v00_mik.OX345645.1G565.1	Choren_v00_mik.OX359192.1G711.1	Osclob_v00_mik.OX382157.1G260.1	8	1016412	1018401	299	4	5555419	5557492	841	10	4011673	4013963	674	22	3677678	3679783	458	1	7746509	7748585	906	7	353530	355603	99	0	1	0	0	0	0	0	osc	EI2BE	1
150	Hpan_g13245.t1	Adami_g727.t1	PHAVENT1A017168P1	Petfic_v00_mik.OX345645.1G136.1	Choren_v00_mik.OX359192.1G241.1	Osclob_v00_mik.OX382159.1G141.1	10	463698	466871	161	4	1474386	1482615	305	10	637744	645265	159	22	5199289	5204072	780	1	6520342	6525987	720	7	653340	657496	183	d	1	0	0	0	0	0	osc	TTLL6	1
238	Hpan_g14131.t1	Adami_g8674.t1	PHAVENT1A010608P1	Petfic_v00_mik.OX345649.1G697.1	Choren_v00_mik.OX359193.1G301.1	Osclob_v00_mik.OX382154.1G535.1	5	1722246	1729668	607	5	1596746	1605040	355	14	5473026	5476226	849	13	5738550	5743432	787	3	1629288	1634575	316	8	1580218	1582834	355	c	1	0	0	0	0	0	osc	DRC2	1
271	Hpan_g14648.t1	Adami_g8968.t1	PHAVENT1A006548P1	Petfic_v00_mik.OX345649.1G118.1	Choren_v00_mik.OX359193.1G945.1	Osclob_v00_mik.OX382160.1G574.1	11	2388883	2392146	651	5	6129379	6131843	1067	14	580146	582159	138	13	3007632	3014831	449	3	4465193	4479632	666	8	5844696	5850499	936	0	1	0	0	0	0	0	osc	QORX	1
529	Hpan_g4586.t1	Adami_g1273.t1	PHAVENT1A020126P1	Petfic_v00_mik.OX345644.1G874.1	Choren_v00_mik.OX359196.1G725.1	Osclob_v00_mik.OX382153.1G727.1	4	2694041	2699702	841	8	5483961	5490657	876	9	6240850	6258969	1016	7	3057552	3098654	370	1	14435546	14509269	1372	13	4157850	4174398	881	a	1	0	0	0	0	0	osc	XPOT	1
551	Hpan_g4931.t1	Adami_g4122.t1	PHAVENT1A022780P1	Petfic_v00_mik.OX345650.1G553.1	Choren_v00_mik.OX359199.1G595.1	Osclob_v00_mik.OX382162.1G568.1	13	2293775	2297543	661	11	4521421	4529622	709	15	4050862	4061654	651	19	451127	458364	112	12	562496	572358	105	14	290686	298165	93	b	1	0	0	0	0	0	osc	M3K20	1
718	Hpan_g7018.t1	Adami_g8369.t1	PHAVENT1A023054P1	Petfic_v00_mik.OX345646.1G90.1	Choren_v00_mik.OX359189.1G15.1	Osclob_v00_mik.OX382160.1G191.1	11	590713	595176	212	1	29355	33865	10	11	330029	337633	107	23	4271269	4276922	447	2	21881526	21889637	2278	16	1749551	1755855	470	i	1	0	0	0	0	0	osc	WDR3	1
832	Hpan_g8627.t1	Adami_g14247.t1	PHAVENT1A008338P1	Petfic_v00_mik.OX345643.1G93.1	Choren_v00_mik.OX359192.1G1153.1	Osclob_v00_mik.OX382151.1G205.1	2	667841	669998	231	4	7730387	7733448	1375	8	369909	374173	113	16	197261	203466	77	6	9251479	9256618	1342	17	5724843	5727140	1106	d	1	0	0	0	0	0	osc	SEP12	1
850	Hpan_g8824.t1	Adami_g7682.t1	PHAVENT1A023114P1	Petfic_v00_mik.OX345641.1G987.1	Choren_v00_mik.OX359195.1G805.1	Osclob_v00_mik.OX382167.1G29.1	18	92321	94703	34	7	6143629	6149913	924	6	7862954	7866768	1154	5	7521723	7534259	890	2	13359367	13370939	1437	2	782134	789393	232	g	1	0	0	0	0	0	osc	NDUV1	1
5	Hpan_g10174.t1	Adami_g17097.t1	PHAVENT1A013003P1	Petfic_v00_mik.OX345636.1G1701.1	Choren_v00_mik.OX359195.1G75.1	Osclob_v00_mik.OX382168.1G350.1	19	1609633	1615135	423	7	471294	486991	79	1	15948141	15991716	1916	12	1279887	1289221	226	9	8531186	8550533	672	3	2298092	2310091	295	g	0	0	1	0	0	0	pfici	AP3D1	1
23	Hpan_g10670.t1	Adami_g2630.t1	PHAVENT1A020011P1	Petfic_v00_mik.OX345645.1G897.1	Choren_v00_mik.OX359191.1G880.1	Osclob_v00_mik.OX382165.1G476.1	16	2296110	2302833	575	3	7367304	7372734	1027	10	6819030	6821789	1050	11	3057190	3079346	270	10	10832198	10842010	772	3	6766021	6770566	856	h	0	0	1	0	0	0	pfici	NADK	1
26	Hpan_g10692.t1	Adami_g2114.t1	PHAVENT1A011258P1	Petfic_v00_mik.OX345653.1G215.1	Choren_v00_mik.OX359191.1G1268.1	Osclob_v00_mik.OX382165.1G341.1	16	1894685	1898942	439	3	9399190	9402178	1506	18	1383064	1426072	275	11	6416384	6451270	579	10	1831101	1868176	166	3	6944170	6955314	883	h	0	0	1	0	0	0	pfici	PRS7	1
89	Hpan_g11785.t1	Adami_g14885.t1	PHAVENT1A004113P1	Petfic_v00_mik.OX345636.1G5390.1	Choren_v00_mik.OX359197.1G52.1	Osclob_v00_mik.OX382164.1G94.1	15	336201	337489	106	9	231826	233741	55	1	45826872	45839372	6014	18	587054	591449	135	7	268935	273399	72	5	124971	126479	43	j	0	0	1	0	0	0	pfici	TXNL1	1
95	Hpan_g11863.t1	Adami_g14837.t1	PHAVENT1A022762P1	Petfic_v00_mik.OX345642.1G933.1	Choren_v00_mik.OX359197.1G37.1	Osclob_v00_mik.OX382154.1G450.1	5	1500559	1509144	520	9	167255	171815	40	7	7180138	7185492	1073	18	280165	285282	73	7	50655	55943	16	5	543186	548218	135	0	0	0	1	0	0	0	pfici	DDX24	1
109	Hpan_g12330.t1	Adami_g15071.t1	PHAVENT1A001876P1	Petfic_v00_mik.OX345636.1G4240.1	Choren_v00_mik.OX359197.1G737.1	Osclob_v00_mik.OX382164.1G246.1	15	972431	974523	278	9	5636789	5641497	863	1	34728051	34764192	4718	18	6551378	6555306	665	7	2359959	2364416	337	5	6891558	6895901	693	j	0	0	1	0	0	0	pfici	FAAA	1
155	Hpan_g13295.t1	Adami_g778.t1	PHAVENT1A019141P1	Petfic_v00_mik.OX345645.1G171.1	Choren_v00_mik.OX359192.1G126.1	Osclob_v00_mik.OX382159.1G249.1	10	892991	894405	289	4	670730	673810	153	10	910036	912633	189	22	5257540	5259838	795	1	6847546	6860060	786	7	919592	922624	241	d	0	0	1	0	0	0	pfici	NSA2	1
180	Hpan_g13533.t1	Adami_g777.t1	PHAVENT1A023418P1	Petfic_v00_mik.OX345645.1G168.1	Choren_v00_mik.OX359192.1G3.1	Osclob_v00_mik.OX382159.1G151.1	10	496826	499276	174	4	8398	10435	2	10	912862	919775	190	22	5250158	5257277	794	1	6841520	6847118	785	7	3178360	3182957	527	d	0	0	1	0	0	0	pfici	SNX27	1
217	Hpan_g14004.t1	Adami_g8555.t1	PHAVENT1A023355P1	Petfic_v00_mik.OX345649.1G490.1	Choren_v00_mik.OX359193.1G200.1	Osclob_v00_mik.OX382150.1G774.1	1	2567299	2570097	908	5	917823	924567	241	14	3962528	3970680	604	13	5993411	5997294	839	3	810901	814821	178	8	936456	939927	207	0	0	0	1	0	0	0	pfici	DDX52	1
232	Hpan_g14096.t1	Adami_g8609.t1	PHAVENT1A021483P1	Petfic_v00_mik.OX345649.1G440.1	Choren_v00_mik.OX359193.1G451.1	Osclob_v00_mik.OX382164.1G268.1	15	1082859	1084570	299	5	2509290	2511243	522	14	3586515	3590614	537	13	3855094	3857629	510	3	1122569	1124174	244	8	1396131	1397733	316	0	0	0	1	0	0	0	pfici	-	1
269	Hpan_g14589.t1	Adami_g9094.t1	PHAVENT1A022172P1	Petfic_v00_mik.OX345649.1G413.1	Choren_v00_mik.OX359193.1G227.1	Osclob_v00_mik.OX382160.1G238.1	11	738851	740621	266	5	1020535	1023207	264	14	3244846	3255119	503	13	1018248	1026667	246	3	5854135	5864296	824	8	5456146	5462250	867	0	0	0	1	0	0	0	pfici	PIGT	1
276	Hpan_g14663.t1	Adami_g8908.t1	PHAVENT1A013210P1	Petfic_v00_mik.OX345649.1G98.1	Choren_v00_mik.OX359193.1G1260.1	Osclob_v00_mik.OX382154.1G145.1	5	523923	529686	167	5	7705421	7713058	1441	14	415775	427254	111	13	791085	805778	204	3	3962665	3970931	593	8	5960890	5970183	953	c	0	0	1	0	0	0	pfici	HFM1	1
283	Hpan_g14737.t1	Adami_g8982.t1	PHAVENT1A019219P1	Petfic_v00_mik.OX345649.1G13.1	Choren_v00_mik.OX359193.1G117.1	Osclob_v00_mik.OX382154.1G274.1	5	921632	922981	312	5	459423	461668	136	14	55873	57379	12	13	1740582	1744914	343	3	4570624	4576248	682	8	6508068	6510389	1042	c	0	0	1	0	0	0	pfici	RFC5	1
287	Hpan_g14776.t1	Adami_g8904.t1	PHAVENT1A015052P1	Petfic_v00_mik.OX345649.1G101.1	Choren_v00_mik.OX359193.1G575.1	Osclob_v00_mik.OX382154.1G140.1	5	498971	500766	159	5	3985952	3994714	660	14	435548	438654	117	13	772957	778695	200	3	3947667	3951076	589	8	6803823	6807629	1083	c	0	0	1	0	0	0	pfici	TBL2	1
354	Hpan_g15767.t1	Adami_g12611.t1	PHAVENT1A005860P1	Petfic_v00_mik.OX345638.1G16.1	Choren_v00_mik.OX359193.1G1085.1	Osclob_v00_mik.OX382163.1G381.1	14	1757315	1762099	453	5	6972704	6978130	1237	3	42671	45375	8	20	844331	850126	228	5	12294980	12314936	1092	9	5701072	5703876	1042	c	0	0	1	0	0	0	pfici	PCCB	1
371	Hpan_g16035.t1	Adami_g12442.t1	PHAVENT1A012178P1	Petfic_v00_mik.OX345638.1G327.1	Choren_v00_mik.OX359193.1G1009.1	Osclob_v00_mik.OX382163.1G538.1	14	2345837	2346614	643	5	6481730	6484549	1142	3	2350322	2364835	386	20	911761	919758	250	5	8834354	8864227	903	9	6844974	6849019	1347	c	0	0	1	0	0	0	pfici	RUBIC	1
446	Hpan_g3090.t1	Adami_g3527.t1	PHAVENT1A015597P1	Petfic_v00_mik.OX345642.1G757.1	Choren_v00_mik.OX359200.1G812.1	Osclob_v00_mik.OX382152.1G754.1	3	2741855	2744378	870	12	5916228	5918731	937	7	6173939	6182317	882	21	3585989	3595130	524	11	6686797	6711059	901	12	492595	495145	146	b	0	0	1	0	0	0	pfici	RPB3	1
532	Hpan_g4655.t1	Adami_g1412.t1	PHAVENT1A016676P1	Petfic_v00_mik.OX345653.1G240.1	Choren_v00_mik.OX359198.1G815.1	Osclob_v00_mik.OX382165.1G492.1	16	2336017	2337056	591	10	6145955	6147546	984	18	1571542	1573493	302	7	1453934	1460043	227	1	16784541	16787519	1536	13	4554254	4555994	962	0	0	0	1	0	0	0	pfici	MITD1	1
560	Hpan_g5116.t1	Adami_g4291.t1	PHAVENT1A020112P1	Petfic_v00_mik.OX345650.1G617.1	Choren_v00_mik.OX359196.1G509.1	Osclob_v00_mik.OX382162.1G531.1	13	2172368	2175957	609	8	4348679	4353698	606	15	4711890	4718292	733	19	3541040	3546404	392	12	2094252	2102171	320	14	2289062	2293180	303	0	0	0	1	0	0	0	pfici	-	1
561	Hpan_g5180.t1	Adami_g4112.t1	PHAVENT1A000876P1	Petfic_v00_mik.OX345650.1G572.1	Choren_v00_mik.OX359199.1G712.1	Osclob_v00_mik.OX382157.1G61.1	8	184768	186617	71	11	5231950	5234639	849	15	4215941	4228308	677	19	510340	515672	124	12	512004	519731	93	14	2993535	2998223	377	0	0	1	1	0	0	0	pfici	ENOF1	2
586	Hpan_g5665.t1	Adami_g13382.t1	PHAVENT1A014381P1	Petfic_v00_mik.OX345639.1G785.1	Choren_v00_mik.OX359202.1G226.1	Osclob_v00_mik.OX382156.1G742.1	7	2938363	2943680	854	14	924410	938781	263	4	4778805	4793710	929	15	5903331	5919247	837	6	1213663	1248945	251	15	144832	155092	56	e	0	0	1	0	0	0	pfici	COG2	1
597	Hpan_g5750.t1	Adami_g13572.t1	PHAVENT1A019581P1	Petfic_v00_mik.OX345639.1G1135.1	Choren_v00_mik.OX359202.1G589.1	Osclob_v00_mik.OX382156.1G204.1	7	759046	760947	240	14	4358780	4363581	693	4	7225375	7234041	1329	15	4208505	4221473	573	6	2713358	2717968	483	15	406051	409059	152	e	0	0	1	0	0	0	pfici	KAT5	1
648	Hpan_g6455.t1	Adami_g13665.t1	PHAVENT1A016006P1	Petfic_v00_mik.OX345639.1G1390.1	Choren_v00_mik.OX359202.1G655.1	Osclob_v00_mik.OX382156.1G410.1	7	1919879	1921243	483	14	4796351	4801678	767	4	9398309	9401583	1638	15	366300	370374	86	6	3502754	3506164	599	15	5346099	5348826	959	e	0	0	1	0	0	0	pfici	CCNK	1
658	Hpan_g6546.t1	Adami_g13631.t1	PHAVENT1A011314P1	Petfic_v00_mik.OX345639.1G1235.1	Choren_v00_mik.OX359202.1G241.1	Osclob_v00_mik.OX382160.1G762.1	11	3031060	3033866	882	14	1051397	1062939	282	4	8284701	8313426	1446	15	202068	210839	35	6	3314759	3327822	556	15	5659964	5675772	1062	0	0	0	1	0	0	0	pfici	-	1
684	Hpan_g6772.t1	Adami_g6821.t1	PHAVENT1A019676P1	Petfic_v00_mik.OX345652.1G529.1	Choren_v00_mik.OX359196.1G834.1	Osclob_v00_mik.OX382150.1G222.1	1	845572	846878	260	8	6017120	6019514	1015	17	4470637	4473422	622	8	87256	88869	33	2	2363010	2369859	406	16	701709	703432	194	a	0	0	1	0	0	0	pfici	NIPA2	1
721	Hpan_g7046.t1	Adami_g6733.t1	PHAVENT1A019401P1	Petfic_v00_mik.OX345652.1G479.1	Choren_v00_mik.OX359196.1G1026.1	Osclob_v00_mik.OX382159.1G314.1	10	1071598	1075763	357	8	6877841	6885893	1230	17	4094488	4102032	563	8	2535221	2544090	471	2	1686476	1694377	301	16	1833155	1837290	503	0	0	0	1	0	0	0	pfici	PK3C3	1
744	Hpan_g7267.t1	Adami_g8218.t1	PHAVENT1A007290P1	Petfic_v00_mik.OX345646.1G216.1	Choren_v00_mik.OX359189.1G224.1	Osclob_v00_mik.OX382160.1G198.1	11	598389	609119	214	1	1120063	1127573	266	11	1271391	1281308	261	23	5273038	5285801	641	2	20881819	20892496	2089	16	2824169	2834498	766	i	0	1	1	0	0	0	pfici	ERBB3	2
754	Hpan_g7367.t1	Adami_g6858.t1	PHAVENT1A020045P1	Petfic_v00_mik.OX345652.1G124.1	Choren_v00_mik.OX359196.1G1097.1	Osclob_v00_mik.OX382150.1G677.1	1	2348010	2349471	813	8	7228903	7243457	1313	17	721577	736157	158	8	891862	910191	196	2	2773724	2794026	445	16	3602863	3619831	879	a	0	0	1	0	0	0	pfici	GRAP	1
799	Hpan_g8125.t1	Adami_g13977.t1	PHAVENT1A019208P1	Petfic_v00_mik.OX345643.1G614.1	Choren_v00_mik.OX359192.1G1144.1	Osclob_v00_mik.OX382151.1G1072.1	2	3920004	3924257	1235	4	7683567	7686783	1362	8	5550651	5561696	732	16	3513901	3527536	550	6	6134495	6149739	1006	17	2778491	2795208	529	d	0	0	1	0	0	0	pfici	SUN1	1
804	Hpan_g8183.t1	Adami_g14215.t2	PHAVENT1A017360P1	Petfic_v00_mik.OX345643.1G105.1	Choren_v00_mik.OX359192.1G1132.1	Osclob_v00_mik.OX382151.1G792.1	2	2950263	2952456	924	4	7650335	7653709	1345	8	417691	420675	123	16	258755	262801	89	6	9071778	9076304	1300	17	3362583	3365654	597	d	0	0	1	0	0	0	pfici	PDI2	1
818	Hpan_g8453.t1	Adami_g14224.t1	PHAVENT1A003044P1	Petfic_v00_mik.OX345643.1G109.1	Choren_v00_mik.OX359192.1G1207.1	Osclob_v00_mik.OX382151.1G17.1	2	43787	46613	16	4	7947145	7950306	1437	8	428528	436755	126	16	102799	106785	47	6	9120683	9126791	1311	17	5071363	5074521	909	d	0	0	1	0	0	0	pfici	NPL4	1
862	Hpan_g8974.t1	Adami_g11840.t1	PHAVENT1A008198P1	Petfic_v00_mik.OX345648.1G536.1	Choren_v00_mik.OX359199.1G744.1	Osclob_v00_mik.OX382152.1G232.1	3	757267	758094	269	11	5372532	5374109	882	13	4205924	4209761	602	6	7152041	7153408	852	5	1739916	1741071	171	2	1515138	1515837	413	b	0	0	1	0	0	0	pfici	SEC20	1
864	Hpan_g9005.t1	Adami_g7247.t1	PHAVENT1A016419P1	Petfic_v00_mik.OX345641.1G1027.1	Choren_v00_mik.OX359195.1G885.1	Osclob_v00_mik.OX382167.1G33.1	18	104921	109455	38	7	6444734	6457860	1018	6	8029289	8035831	1198	5	7128477	7149536	815	2	7052988	7083878	935	2	1635654	1646665	450	g	0	0	1	0	0	0	pfici	VPS11	1
924	Hpan_g9844.t1	Adami_g7136.t1	PHAVENT1A002692P1	Petfic_v00_mik.OX345641.1G346.1	Choren_v00_mik.OX359195.1G1152.1	Osclob_v00_mik.OX382167.1G147.1	18	394339	396900	162	7	7851575	7857627	1336	6	2234048	2244323	391	5	150436	155193	54	2	5962687	5974191	806	2	8335543	8339404	1417	g	0	0	1	0	0	0	pfici	TM9S1	1
934	Hpan_g9894.t1	Adami_g12351.t1	PHAVENT1A019383P1	Petfic_v00_mik.OX345640.1G433.1	Choren_v00_mik.OX359199.1G791.1	Osclob_v00_mik.OX382152.1G569.1	3	2137477	2138795	664	11	5606018	5612586	936	5	3132123	3144994	516	6	1075574	1131373	159	5	7490867	7515146	793	2	8519515	8525314	1475	b	0	0	1	0	0	0	pfici	ARMD3	1
940	Hpan_g9991.t1	Adami_g16664.t1	PHAVENT1A001479P1	Petfic_v00_mik.OX345636.1G1089.1	Choren_v00_mik.OX359195.1G654.1	Osclob_v00_mik.OX382168.1G230.1	19	1182614	1184140	289	7	5137770	5141721	746	1	10264177	10281881	1204	12	1802804	1810967	277	9	1732673	1742284	186	3	591739	594041	90	g	0	0	1	0	0	0	pfici	DCAF7	1
