# Supplementary material for: Sponge genomes reveal a pre-metazoan origin of the sex determination toolkit and sex chromosomes
Source: Research Square preprint supplement (doi:10.21203/rs.3.rs-8554461/v1), 2026-02-12
Supplement: Supplementary file 16 [file 8b4ae556cc5e00ae0ee35787.xlsx]

## Sheet: A.Oscarella_lobularis
Enrichment FDR	nGenes	Pathway Genes	Fold Enrichment	Pathway	URL	Genes
0.000531894	33	3073	2.53311	GO:0009605 response to external stimulus	http://amigo.geneontology.org/amigo/term/GO:0009605	CNTN1 ULK2 GGT1 RIPK2 KPTN CNTN6 BOC DSCAM MX2 ROBO2 DAPK3 DAPK1 FGFR2 HDAC4 CD209 TRPA1 PTPRS ZNFX1 FLNB TTC5 RIPK1 PTPRQ HMCN1 RYK TTC8 OXSR1 CSMD1 LRRK2 IRAK4 IPO7 MRC1 ABCC9 EYS
0.000988452	20	1375	3.43108	GO:0018193 peptidyl-amino acid modification	http://amigo.geneontology.org/amigo/term/GO:0018193	ULK2 TPST1 TTLL6 SGF29 MVP FGFR2 HDAC4 JMJD6 RIPK2 RIPK1 BRCA2 OXSR1 LRRK2 CNTN1 TIE1 CSK EYA1 LRRK1 RYK ATRX
0.000988452	9	244	8.70074	GO:0046777 protein autophosphorylation	http://amigo.geneontology.org/amigo/term/GO:0046777	MVP FGFR2 ULK2 RIPK1 DAPK3 OXSR1 LRRK2 DAPK1 CSK
0.00244703	14	753	4.38567	GO:0000904 cell morphogenesis involved in differentiation	http://amigo.geneontology.org/amigo/term/GO:0000904	CNTN1 USH2A ULK2 CNTN6 BOC RYK DSCAM ROBO2 LRRK2 PTPRS FLNB PTPRQ TTC8 FGFR2
0.00247138	9	293	7.24566	GO:0098742 cell-cell adhesion via plasma-membrane adhesion molecules	http://amigo.geneontology.org/amigo/term/GO:0098742	SDK2 PTPRS CNTN6 HMCN1 DSCAM ROBO2 FAT2 FAT4 CD209
0.00324178	12	585	4.8387	GO:0048667 cell morphogenesis involved in neuron differentiation	http://amigo.geneontology.org/amigo/term/GO:0048667	CNTN1 ULK2 CNTN6 BOC RYK DSCAM ROBO2 LRRK2 PTPRS PTPRQ TTC8 FGFR2
0.0035275	7	172	9.60004	GO:0007156 homophilic cell adhesion via plasma membrane adhesion molecules	http://amigo.geneontology.org/amigo/term/GO:0007156	SDK2 CNTN6 HMCN1 DSCAM ROBO2 FAT2 FAT4
0.00374239	16	1071	3.52398	GO:0000902 cell morphogenesis	http://amigo.geneontology.org/amigo/term/GO:0000902	CNTN1 USH2A ULK2 CNTN6 BOC RYK DSCAM ROBO2 LRRK2 PTPRS FLNB PTPRQ TTC8 DAPK3 FGFR2 FGD6
0.00395922	37	4424	1.97283	GO:0006950 response to stress	http://amigo.geneontology.org/amigo/term/GO:0006950	REV3L ULK2 MSH2 GGT1 RIPK2 EYA1 WDR48 KPTN MCM8 MYOF BRCA2 MX2 SGF29 TRPA1 RIPK1 DAPK3 NET1 LRRK2 DAPK1 FGFR2 ATRX CD209 PTPRS ZNFX1 FLNB TTC5 PIF1 OXSR1 IRAK4 MT-CO1 IPO7 MRC1 ABCC9 TMTC3 UBXN1 HDAC4 TPST1
0.00400729	28	2867	2.30374	GO:0009653 anatomical structure morphogenesis	http://amigo.geneontology.org/amigo/term/GO:0009653	CNTN1 USH2A TIE1 SDK2 ULK2 CNTN6 BOC RYK SVEP1 DSCAM ROBO2 LRRK2 FGFR2 JMJD6 ATRX EYA1 PTPRS WDR48 FLNB MYOF FRAS1 PTPRQ TTC8 DAPK3 CSMD1 FAT4 MTCH2 FGD6
0.00435356	34	3932	2.03971	GO:0006464 cellular protein modification process	http://amigo.geneontology.org/amigo/term/GO:0006464	HDAC4 ULK2 EYA1 PTPRS WDR48 TMTC3 TPST1 TTLL6 SGF29 LRRK2 BRCA2 MVP FGFR2 JMJD6 ATG4A RIPK2 NAT10 RIPK1 TAF8 NPC1 UBXN1 DAPK3 ATG4B OXSR1 DAPK1 CNTN1 TIE1 CSK PTPRQ LRRK1 RYK IRAK4 ATRX IPO7
0.00445481	34	3952	2.02939	GO:0036211 protein modification process	http://amigo.geneontology.org/amigo/term/GO:0036211	HDAC4 ULK2 EYA1 PTPRS WDR48 TMTC3 TPST1 TTLL6 SGF29 LRRK2 BRCA2 MVP FGFR2 JMJD6 ATG4A RIPK2 NAT10 RIPK1 TAF8 NPC1 UBXN1 DAPK3 ATG4B OXSR1 DAPK1 CNTN1 TIE1 CSK PTPRQ LRRK1 RYK IRAK4 ATRX IPO7
0.00483995	10	452	5.21873	GO:0007409 axonogenesis	http://amigo.geneontology.org/amigo/term/GO:0007409	CNTN1 ULK2 CNTN6 BOC RYK DSCAM ROBO2 PTPRS TTC8 FGFR2
0.00560934	35	4206	1.96292	GO:0043412 macromolecule modification	http://amigo.geneontology.org/amigo/term/GO:0043412	HDAC4 ULK2 EYA1 PTPRS ELP4 WDR48 NAT10 TMTC3 TPST1 TTLL6 SGF29 LRRK2 BRCA2 MVP FGFR2 JMJD6 ATG4A RIPK2 RIPK1 TAF8 NPC1 UBXN1 DAPK3 ATG4B OXSR1 DAPK1 CNTN1 TIE1 CSK PTPRQ LRRK1 RYK IRAK4 ATRX IPO7
0.00597618	7	210	7.86289	GO:0048839 inner ear development	http://amigo.geneontology.org/amigo/term/GO:0048839	USH2A EYA1 PTPRQ TTC8 FAT4 FGFR2 ATG4B
0.00841015	23	2239	2.42313	GO:0048468 cell development	http://amigo.geneontology.org/amigo/term/GO:0048468	CNTN1 USH2A ULK2 CNTN6 MYOF BOC RYK DSCAM ROBO2 LRRK2 FARP2 HDAC4 JMJD6 ATRX MSH2 PTPRS FLNB PTPRQ BRCA2 LRRK1 TTC8 FAT4 FGFR2
0.00882408	10	501	4.70832	GO:0061564 axon development	http://amigo.geneontology.org/amigo/term/GO:0061564	CNTN1 ULK2 CNTN6 BOC RYK DSCAM ROBO2 PTPRS TTC8 FGFR2
0.00921763	9	407	5.21617	GO:0018212 peptidyl-tyrosine modification	http://amigo.geneontology.org/amigo/term/GO:0018212	TPST1 MVP FGFR2 RIPK2 CNTN1 TIE1 CSK LRRK1 RYK
0.010142	7	245	6.73962	GO:0007411 axon guidance	http://amigo.geneontology.org/amigo/term/GO:0007411	CNTN1 CNTN6 BOC DSCAM ROBO2 RYK TTC8
0.010142	21	1994	2.48426	GO:0016310 phosphorylation	http://amigo.geneontology.org/amigo/term/GO:0016310	TIE1 FGFR2 ULK2 RYK LRRK2 MVP RIPK2 RIPK1 TAF8 FBP1 DAPK3 DSCAM OXSR1 DAPK1 PI4KA CNTN1 HDAC4 CSK LRRK1 IRAK4 IPO7
0.010142	22	2160	2.40255	GO:0033554 cellular response to stress	http://amigo.geneontology.org/amigo/term/GO:0033554	REV3L MSH2 EYA1 WDR48 KPTN MCM8 BRCA2 SGF29 TRPA1 RIPK1 NET1 LRRK2 ATRX RIPK2 PTPRS TTC5 PIF1 OXSR1 IRAK4 TMTC3 UBXN1 DAPK1
0.010142	7	239	6.90881	GO:0043583 ear development	http://amigo.geneontology.org/amigo/term/GO:0043583	USH2A EYA1 PTPRQ TTC8 FAT4 FGFR2 ATG4B
0.010142	8	331	5.70119	GO:0072001 renal system development	http://amigo.geneontology.org/amigo/term/GO:0072001	JMJD6 EYA1 FRAS1 TTC8 LRRK2 FAT4 ROBO2 FGFR2
0.010142	7	246	6.71222	GO:0097485 neuron projection guidance	http://amigo.geneontology.org/amigo/term/GO:0097485	CNTN1 CNTN6 BOC DSCAM ROBO2 RYK TTC8
0.0101426	27	3005	2.11945	GO:0006796 phosphate-containing compound metabolic process	http://amigo.geneontology.org/amigo/term/GO:0006796	TIE1 FGFR2 ULK2 EYA1 PTPRS ABHD8 RYK FBP1 LRRK2 PI4KA MVP RIPK2 RIPK1 TAF8 DAPK3 DSCAM OXSR1 DAPK1 CNTN1 HDAC4 CSK PTPRQ DPYS LRRK1 IRAK4 TPST1 IPO7
0.0101426	11	647	4.01044	GO:0048812 neuron projection morphogenesis	http://amigo.geneontology.org/amigo/term/GO:0048812	CNTN1 ULK2 CNTN6 BOC RYK DSCAM ROBO2 LRRK2 PTPRS TTC8 FGFR2
0.0107682	27	3030	2.10196	GO:0006793 phosphorus metabolic process	http://amigo.geneontology.org/amigo/term/GO:0006793	TIE1 FGFR2 ULK2 EYA1 PTPRS ABHD8 RYK FBP1 LRRK2 PI4KA MVP RIPK2 RIPK1 TAF8 DAPK3 DSCAM OXSR1 DAPK1 CNTN1 HDAC4 CSK PTPRQ DPYS LRRK1 IRAK4 TPST1 IPO7
0.0107682	11	656	3.95542	GO:0048589 developmental growth	http://amigo.geneontology.org/amigo/term/GO:0048589	ULK2 DSCAM FGFR2 ATRX PTPRS WDR48 TAF8 BRCA2 RYK TTC8 EYS
0.0109244	17	1449	2.76748	GO:0030182 neuron differentiation	http://amigo.geneontology.org/amigo/term/GO:0030182	CNTN1 ULK2 CNTN6 BOC RYK DSCAM ROBO2 LRRK2 USH2A FARP2 SDK2 EYA1 PTPRS PTPRQ TTC8 FAT4 FGFR2
0.0109244	11	662	3.91957	GO:0120039 plasma membrane bounded cell projection morphogenesis	http://amigo.geneontology.org/amigo/term/GO:0120039	CNTN1 ULK2 CNTN6 BOC RYK DSCAM ROBO2 LRRK2 PTPRS TTC8 FGFR2
0.0111201	11	667	3.89018	GO:0048858 cell projection morphogenesis	http://amigo.geneontology.org/amigo/term/GO:0048858	CNTN1 ULK2 CNTN6 BOC RYK DSCAM ROBO2 LRRK2 PTPRS TTC8 FGFR2
0.0137659	11	686	3.78244	GO:0032990 cell part morphogenesis	http://amigo.geneontology.org/amigo/term/GO:0032990	CNTN1 ULK2 CNTN6 BOC RYK DSCAM ROBO2 LRRK2 PTPRS TTC8 FGFR2
0.0140533	3	26	27.2177	GO:0006312 mitotic recombination	http://amigo.geneontology.org/amigo/term/GO:0006312	MSH2 TEP1 BRCA2
0.0140533	12	816	3.46892	GO:0007420 brain development	http://amigo.geneontology.org/amigo/term/GO:0007420	CNTN1 ROBO2 ATRX CSK PTPRS BRCA2 RYK TTC8 LRRK2 FAT4 MT-CO1 FGFR2
0.0140533	5	121	9.74738	GO:0034502 protein localization to chromosome	http://amigo.geneontology.org/amigo/term/GO:0034502	BRCA2 ATRX MSH2 MCM8 SGF29
0.0140533	2	5	94.3546	GO:0051697 protein delipidation	http://amigo.geneontology.org/amigo/term/GO:0051697	ATG4A ATG4B
0.0144667	8	373	5.05923	GO:0001655 urogenital system development	http://amigo.geneontology.org/amigo/term/GO:0001655	JMJD6 EYA1 FRAS1 TTC8 LRRK2 FAT4 ROBO2 FGFR2
0.0149412	4	68	13.8757	GO:0060113 inner ear receptor cell differentiation	http://amigo.geneontology.org/amigo/term/GO:0060113	USH2A PTPRQ TTC8 FAT4
0.0151365	17	1522	2.63474	GO:0048699 generation of neurons	http://amigo.geneontology.org/amigo/term/GO:0048699	CNTN1 ULK2 CNTN6 BOC RYK DSCAM ROBO2 LRRK2 USH2A FARP2 SDK2 EYA1 PTPRS PTPRQ TTC8 FAT4 FGFR2
0.0157097	26	2990	2.05119	GO:0007166 cell surface receptor signaling pathway	http://amigo.geneontology.org/amigo/term/GO:0007166	TIE1 FGFR2 CSK EYA1 LRRK1 RYK LRRK2 IRAK4 RIPK1 MVP CENPJ FARP2 CNTN1 JMJD6 RIPK2 TRPA1 CNTN6 BOC GRIA1 SVEP1 DSCAM OXSR1 FAT4 DAPK1 DAPK3 ROBO2
0.0157561	14	1105	2.98861	GO:0009887 animal organ morphogenesis	http://amigo.geneontology.org/amigo/term/GO:0009887	USH2A SDK2 EYA1 WDR48 FRAS1 PTPRQ RYK TTC8 DSCAM CSMD1 LRRK2 FAT4 FGFR2 ROBO2
0.0185141	6	212	6.67604	GO:0001763 morphogenesis of a branching structure	http://amigo.geneontology.org/amigo/term/GO:0001763	TIE1 EYA1 CSMD1 FAT4 LRRK2 FGFR2
0.0185141	10	614	3.8418	GO:0007423 sensory organ development	http://amigo.geneontology.org/amigo/term/GO:0007423	SDK2 USH2A JMJD6 EYA1 PTPRQ TTC8 DSCAM FAT4 FGFR2 ATG4B
0.0185141	12	865	3.27242	GO:0060322 head development	http://amigo.geneontology.org/amigo/term/GO:0060322	CNTN1 ROBO2 ATRX CSK PTPRS BRCA2 RYK TTC8 LRRK2 FAT4 MT-CO1 FGFR2
0.0185141	15	1271	2.78387	GO:0060429 epithelium development	http://amigo.geneontology.org/amigo/term/GO:0060429	BRCA2 USH2A TIE1 ATRX EYA1 PTPRS FLNB FRAS1 PTPRQ RYK TTC8 CSMD1 FAT4 ROBO2 FGFR2
0.0186491	30	3774	1.87509	GO:0048513 animal organ development	http://amigo.geneontology.org/amigo/term/GO:0048513	CNTN1 USH2A SDK2 ROBO2 BRCA2 FARP2 TIE1 FGFR2 HDAC4 JMJD6 ATRX MSH2 CSK RIPK2 EYA1 PTPRS WDR48 FLNB FRAS1 PTPRQ LRRK1 RYK TTC8 DSCAM CSMD1 LRRK2 FAT4 MT-CO1 RIPK1 ATG4B
0.0186491	3	31	22.8277	GO:0060219 camera-type eye photoreceptor cell differentiation	http://amigo.geneontology.org/amigo/term/GO:0060219	SDK2 TTC8 DSCAM
0.019003	13	1006	3.04824	GO:0040007 growth	http://amigo.geneontology.org/amigo/term/GO:0040007	ULK2 FBP1 DSCAM FGFR2 ATRX PTPRS WDR48 TAF8 BRCA2 RYK TTC8 EYS NET1
0.0190106	8	405	4.65949	GO:0018108 peptidyl-tyrosine phosphorylation	http://amigo.geneontology.org/amigo/term/GO:0018108	MVP FGFR2 RIPK2 CNTN1 TIE1 CSK LRRK1 RYK
0.0198213	8	409	4.61392	GO:0030900 forebrain development	http://amigo.geneontology.org/amigo/term/GO:0030900	ATRX PTPRS RYK TTC8 LRRK2 FAT4 FGFR2 ROBO2
0.0198213	4	79	11.9436	GO:0042490 mechanoreceptor differentiation	http://amigo.geneontology.org/amigo/term/GO:0042490	USH2A PTPRQ TTC8 FAT4
0.0208056	18	1757	2.4166	GO:0022008 neurogenesis	http://amigo.geneontology.org/amigo/term/GO:0022008	CNTN1 ULK2 CNTN6 BOC RYK DSCAM ROBO2 LRRK2 USH2A FARP2 SDK2 CSK EYA1 PTPRS PTPRQ TTC8 FAT4 FGFR2
0.0211634	3	34	20.8135	GO:0021772 olfactory bulb development	http://amigo.geneontology.org/amigo/term/GO:0021772	TTC8 LRRK2 ROBO2
0.0211634	14	1169	2.82499	GO:0048666 neuron development	http://amigo.geneontology.org/amigo/term/GO:0048666	CNTN1 ULK2 CNTN6 BOC RYK DSCAM ROBO2 LRRK2 FARP2 PTPRS PTPRQ TTC8 FAT4 FGFR2
0.0215012	14	1173	2.81536	GO:0051276 chromosome organization	http://amigo.geneontology.org/amigo/term/GO:0051276	ZNFX1 TEP1 PIF1 HDAC4 ATRX GRWD1 MCM8 JMJD6 EYA1 BRCA2 DAPK3 SGF29 MSH2 NAT10
0.0217599	10	649	3.63462	GO:0006281 DNA repair	http://amigo.geneontology.org/amigo/term/GO:0006281	REV3L MSH2 EYA1 WDR48 MCM8 BRCA2 SGF29 ATRX TTC5 PIF1
0.0221137	7	322	5.12797	GO:0001822 kidney development	http://amigo.geneontology.org/amigo/term/GO:0001822	JMJD6 EYA1 FRAS1 LRRK2 FAT4 ROBO2 FGFR2
0.0232294	3	36	19.6572	GO:0021988 olfactory lobe development	http://amigo.geneontology.org/amigo/term/GO:0021988	TTC8 LRRK2 ROBO2
0.0234076	6	234	6.04837	GO:0008406 gonad development	http://amigo.geneontology.org/amigo/term/GO:0008406	ATRX MSH2 WDR48 BRCA2 CSMD1 ROBO2
0.0241581	11	789	3.28866	GO:0032989 cellular component morphogenesis	http://amigo.geneontology.org/amigo/term/GO:0032989	CNTN1 ULK2 CNTN6 BOC RYK DSCAM ROBO2 LRRK2 PTPRS TTC8 FGFR2
0.0248973	6	239	5.92184	GO:0045137 development of primary sexual characteristics	http://amigo.geneontology.org/amigo/term/GO:0045137	ATRX MSH2 WDR48 BRCA2 CSMD1 ROBO2
0.0248973	4	88	10.7221	GO:0070301 cellular response to hydrogen peroxide	http://amigo.geneontology.org/amigo/term/GO:0070301	TRPA1 NET1 RIPK1 LRRK2
0.0250395	23	2642	2.05352	GO:0008104 protein localization	http://amigo.geneontology.org/amigo/term/GO:0008104	OXA1L LRRK2 IPO7 CSK TAF8 BRCA2 NPC1 MVP USH2A ATRX ATG4A FRAS1 TTC8 ATG4B PLRG1 MX2 XPOT MSH2 MTCH2 KPTN MCM8 CENPJ SGF29
0.0251678	5	158	7.46477	GO:0050770 regulation of axonogenesis	http://amigo.geneontology.org/amigo/term/GO:0050770	ULK2 DSCAM ROBO2 PTPRS RYK
0.0283403	4	93	10.1457	GO:0001656 metanephros development	http://amigo.geneontology.org/amigo/term/GO:0001656	EYA1 FRAS1 FAT4 ROBO2
0.0283403	17	1684	2.38128	GO:0006468 protein phosphorylation	http://amigo.geneontology.org/amigo/term/GO:0006468	ULK2 LRRK2 MVP FGFR2 RIPK2 RIPK1 TAF8 DAPK3 OXSR1 DAPK1 CNTN1 TIE1 CSK LRRK1 RYK IRAK4 IPO7
0.0283403	24	2847	1.98851	GO:0035556 intracellular signal transduction	http://amigo.geneontology.org/amigo/term/GO:0035556	RIPK2 KPTN RIT1 DAPK3 NET1 LRRK2 DAPK1 IRAK4 PI4KA BRCA2 FARP2 RIPK1 RYK FBP1 OXSR1 HDAC4 ATRX MSH2 CSK AGO3 LRRK1 FAT4 FGFR2 CD209
0.0287632	9	568	3.73764	GO:0010035 response to inorganic substance	http://amigo.geneontology.org/amigo/term/GO:0010035	TRPA1 FBP1 NET1 ATRX RIPK1 NPC1 GRIA1 MT-CO1 LRRK2
0.0287732	7	348	4.74485	GO:0006310 DNA recombination	http://amigo.geneontology.org/amigo/term/GO:0006310	REV3L MSH2 WDR48 MCM8 TEP1 BRCA2 PIF1
0.0287732	5	166	7.10502	GO:0048754 branching morphogenesis of an epithelial tube	http://amigo.geneontology.org/amigo/term/GO:0048754	TIE1 EYA1 CSMD1 FAT4 FGFR2
0.0291465	5	167	7.06247	GO:0000723 telomere maintenance	http://amigo.geneontology.org/amigo/term/GO:0000723	TEP1 PIF1 ATRX BRCA2 NAT10
0.0295204	2	10	47.1773	GO:0016237 lysosomal microautophagy	http://amigo.geneontology.org/amigo/term/GO:0016237	ULK2 ATG4B
0.0295204	2	10	47.1773	GO:0048755 branching morphogenesis of a nerve	http://amigo.geneontology.org/amigo/term/GO:0048755	LRRK2 FGFR2
0.0295204	2	10	47.1773	GO:0071600 otic vesicle morphogenesis	http://amigo.geneontology.org/amigo/term/GO:0071600	EYA1 FGFR2
0.0295204	13	1104	2.77765	GO:0098609 cell-cell adhesion	http://amigo.geneontology.org/amigo/term/GO:0098609	CNTN1 SDK2 FAT2 PTPRS CNTN6 HMCN1 BOC DSCAM ROBO2 FAT4 CD209 RIPK2 CSK
0.0318627	12	977	2.89728	GO:0033365 protein localization to organelle	http://amigo.geneontology.org/amigo/term/GO:0033365	OXA1L LRRK2 IPO7 TAF8 BRCA2 ATRX PLRG1 MSH2 MTCH2 KPTN MCM8 SGF29
0.0318627	28	3630	1.81951	GO:0044085 cellular component biogenesis	http://amigo.geneontology.org/amigo/term/GO:0044085	WDR3 SDK2 ULK2 MDN1 ZNFX1 NAT10 CENPJ OXA1L TTC8 LRRK2 JMJD6 ATRX TRPA1 GRWD1 AGO3 DAPK3 FARP2 CNTN1 TIE1 HDAC4 PTPRS RIPK1 ATG4B TAF8 DSCAM FGD6 ROBO2 RYK
0.0319824	4	101	9.34204	GO:0001657 ureteric bud development	http://amigo.geneontology.org/amigo/term/GO:0001657	EYA1 FAT4 ROBO2 FGFR2
0.0319824	17	1729	2.3193	GO:0007155 cell adhesion	http://amigo.geneontology.org/amigo/term/GO:0007155	CNTN1 USH2A SDK2 FAT2 PTPRS CNTN6 HMCN1 BOC DSCAM ROBO2 FAT4 CD209 DAPK3 FARP2 RIPK2 SVEP1 CSK
0.0319824	13	1123	2.73066	GO:0007417 central nervous system development	http://amigo.geneontology.org/amigo/term/GO:0007417	CNTN1 ROBO2 ATRX CSK PTPRS BRCA2 RYK TTC8 LRRK2 FAT4 MT-CO1 FGFR2 CNTN6
0.0319824	4	102	9.25045	GO:0060993 kidney morphogenesis	http://amigo.geneontology.org/amigo/term/GO:0060993	EYA1 FRAS1 LRRK2 FAT4
0.0319824	4	102	9.25045	GO:0072163 mesonephric epithelium development	http://amigo.geneontology.org/amigo/term/GO:0072163	EYA1 FAT4 ROBO2 FGFR2
0.0319824	4	102	9.25045	GO:0072164 mesonephric tubule development	http://amigo.geneontology.org/amigo/term/GO:0072164	EYA1 FAT4 ROBO2 FGFR2
0.0321258	2	11	42.8885	GO:0048671 negative regulation of collateral sprouting	http://amigo.geneontology.org/amigo/term/GO:0048671	ULK2 PTPRS
0.0324129	5	178	6.62603	GO:0008037 cell recognition	http://amigo.geneontology.org/amigo/term/GO:0008037	CNTN6 DSCAM JMJD6 ROBO2 CD209
0.0324873	33	4617	1.686	GO:0048731 system development	http://amigo.geneontology.org/amigo/term/GO:0048731	CNTN1 TIE1 SDK2 ULK2 MSH2 CNTN6 BOC RYK SVEP1 DSCAM ROBO2 LRRK2 USH2A FARP2 FGFR2 HDAC4 JMJD6 ATRX CSK RIPK2 EYA1 PTPRS WDR48 FRAS1 PTPRQ BRCA2 LRRK1 TTC8 CSMD1 FAT4 MT-CO1 RIPK1 TLL1
0.0331921	13	1138	2.69466	GO:0006259 DNA metabolic process	http://amigo.geneontology.org/amigo/term/GO:0006259	REV3L MSH2 EYA1 WDR48 MCM8 TEP1 BRCA2 PIF1 SGF29 ATRX GRWD1 TTC5 NAT10
0.0343699	12	1001	2.82781	GO:0031175 neuron projection development	http://amigo.geneontology.org/amigo/term/GO:0031175	CNTN1 ULK2 CNTN6 BOC RYK DSCAM ROBO2 LRRK2 PTPRS TTC8 FAT4 FGFR2
0.0344198	4	106	8.90138	GO:0001823 mesonephros development	http://amigo.geneontology.org/amigo/term/GO:0001823	EYA1 FAT4 ROBO2 FGFR2
0.0362035	6	276	5.12797	GO:0021537 telencephalon development	http://amigo.geneontology.org/amigo/term/GO:0021537	PTPRS RYK TTC8 LRRK2 FAT4 ROBO2
0.0367117	3	49	14.442	GO:0008038 neuron recognition	http://amigo.geneontology.org/amigo/term/GO:0008038	CNTN6 DSCAM ROBO2
0.0372008	22	2618	1.98224	GO:0007399 nervous system development	http://amigo.geneontology.org/amigo/term/GO:0007399	CNTN1 SDK2 ULK2 CNTN6 BOC RYK DSCAM ROBO2 LRRK2 USH2A FARP2 ATRX CSK EYA1 PTPRS PTPRQ BRCA2 TTC8 FAT4 MT-CO1 FGFR2 HDAC4
0.0382013	17	1782	2.25032	GO:0034613 cellular protein localization	http://amigo.geneontology.org/amigo/term/GO:0034613	OXA1L LRRK2 IPO7 CSK TAF8 BRCA2 NPC1 ATRX TTC8 PLRG1 XPOT MSH2 MTCH2 KPTN MCM8 ATG4B SGF29
0.0382968	14	1318	2.50562	GO:0042325 regulation of phosphorylation	http://amigo.geneontology.org/amigo/term/GO:0042325	TIE1 FGFR2 RYK LRRK2 MVP RIPK2 FBP1 DSCAM CNTN1 HDAC4 CSK RIPK1 LRRK1 IPO7
0.0382968	7	387	4.26668	GO:0042326 negative regulation of phosphorylation	http://amigo.geneontology.org/amigo/term/GO:0042326	MVP FBP1 HDAC4 CSK LRRK1 LRRK2 IPO7
0.0382968	3	51	13.8757	GO:0060119 inner ear receptor cell development	http://amigo.geneontology.org/amigo/term/GO:0060119	PTPRQ TTC8 FAT4
0.0382968	17	1791	2.23901	GO:0070727 cellular macromolecule localization	http://amigo.geneontology.org/amigo/term/GO:0070727	OXA1L LRRK2 IPO7 CSK TAF8 BRCA2 NPC1 ATRX TTC8 PLRG1 XPOT MSH2 MTCH2 KPTN MCM8 ATG4B SGF29
0.0382968	4	111	8.50042	GO:0090263 positive regulation of canonical Wnt signaling pathway	http://amigo.geneontology.org/amigo/term/GO:0090263	LRRK1 LRRK2 DAPK3 FGFR2
0.0388421	26	3365	1.8226	GO:0022607 cellular component assembly	http://amigo.geneontology.org/amigo/term/GO:0022607	SDK2 ULK2 MDN1 ZNFX1 CENPJ OXA1L TTC8 LRRK2 JMJD6 ATRX TRPA1 GRWD1 AGO3 DAPK3 FARP2 CNTN1 TIE1 HDAC4 PTPRS RIPK1 ATG4B TAF8 DSCAM FGD6 ROBO2 RYK
0.0388421	4	113	8.34997	GO:0061387 regulation of extent of cell growth	http://amigo.geneontology.org/amigo/term/GO:0061387	ULK2 DSCAM PTPRS RYK
0.0389284	3	52	13.6088	GO:0001754 eye photoreceptor cell differentiation	http://amigo.geneontology.org/amigo/term/GO:0001754	SDK2 TTC8 DSCAM
0.0389284	5	193	6.11105	GO:0007416 synapse assembly	http://amigo.geneontology.org/amigo/term/GO:0007416	SDK2 PTPRS DSCAM ROBO2 RYK
0.0410124	2	14	33.6981	GO:0001833 inner cell mass cell proliferation	http://amigo.geneontology.org/amigo/term/GO:0001833	TAF8 BRCA2
0.0410124	6	292	4.84698	GO:0007548 sex differentiation	http://amigo.geneontology.org/amigo/term/GO:0007548	ATRX MSH2 WDR48 BRCA2 CSMD1 ROBO2
0.0410124	3	54	13.1048	GO:0045005 DNA-templated DNA replication maintenance of fidelity	http://amigo.geneontology.org/amigo/term/GO:0045005	MCM8 ATRX BRCA2
0.0410124	2	14	33.6981	GO:0045820 negative regulation of glycolytic process	http://amigo.geneontology.org/amigo/term/GO:0045820	FBP1 HDAC4
0.0410124	5	198	5.95673	GO:0061138 morphogenesis of a branching epithelium	http://amigo.geneontology.org/amigo/term/GO:0061138	TIE1 EYA1 CSMD1 FAT4 FGFR2
0.0410124	6	291	4.86364	GO:0090596 sensory organ morphogenesis	http://amigo.geneontology.org/amigo/term/GO:0090596	SDK2 EYA1 PTPRQ TTC8 DSCAM FGFR2
0.0414236	5	199	5.9268	GO:0032200 telomere organization	http://amigo.geneontology.org/amigo/term/GO:0032200	TEP1 PIF1 ATRX BRCA2 NAT10
0.0418412	32	4552	1.65825	GO:0030154 cell differentiation	http://amigo.geneontology.org/amigo/term/GO:0030154	CNTN1 USH2A ULK2 EYA1 CNTN6 MYOF BOC RYK DSCAM ROBO2 LRRK2 FARP2 TAF8 TLL1 TIE1 FGFR2 HDAC4 SDK2 JMJD6 ATRX MSH2 CSK RIPK2 PTPRS FLNB PTPRQ BRCA2 LRRK1 TTC8 FAT4 RIPK1 MTCH2
0.041878	3	55	12.8665	GO:0071168 protein localization to chromatin	http://amigo.geneontology.org/amigo/term/GO:0071168	MSH2 MCM8 SGF29
0.041878	9	644	3.29655	GO:0120035 regulation of plasma membrane bounded cell projection organization	http://amigo.geneontology.org/amigo/term/GO:0120035	ULK2 LRRK2 DSCAM ROBO2 CNTN1 HDAC4 PTPRS CENPJ RYK
0.0438131	2	15	31.4515	GO:0000722 telomere maintenance via recombination	http://amigo.geneontology.org/amigo/term/GO:0000722	TEP1 BRCA2
0.0438131	2	15	31.4515	GO:0022038 corpus callosum development	http://amigo.geneontology.org/amigo/term/GO:0022038	PTPRS RYK
0.0438131	27	3617	1.76083	GO:0031325 positive regulation of cellular metabolic process	http://amigo.geneontology.org/amigo/term/GO:0031325	TIE1 FGFR2 ULK2 EYA1 RYK LRRK2 SGF29 HDAC4 JMJD6 RIPK2 WDR48 NAT10 RIPK1 TAF8 BRCA2 DSCAM DAPK1 CNTN1 ATRX MSH2 CSK AGO3 TTC5 CENPJ LRRK1 CLPX TMTC3
0.0438131	32	4576	1.64956	GO:0048869 cellular developmental process	http://amigo.geneontology.org/amigo/term/GO:0048869	CNTN1 USH2A ULK2 EYA1 CNTN6 MYOF BOC RYK DSCAM ROBO2 LRRK2 FARP2 TAF8 TLL1 TIE1 FGFR2 HDAC4 SDK2 JMJD6 ATRX MSH2 CSK RIPK2 PTPRS FLNB PTPRQ BRCA2 LRRK1 TTC8 FAT4 RIPK1 MTCH2
0.0438131	2	15	31.4515	GO:0071599 otic vesicle development	http://amigo.geneontology.org/amigo/term/GO:0071599	EYA1 FGFR2
0.044347	6	303	4.67102	GO:0006260 DNA replication	http://amigo.geneontology.org/amigo/term/GO:0006260	PIF1 MCM8 REV3L ATRX GRWD1 BRCA2
0.0453803	30	4206	1.6825	GO:0006996 organelle organization	http://amigo.geneontology.org/amigo/term/GO:0006996	ULK2 MDN1 ZNFX1 TEP1 PIF1 CENPJ OXA1L TTC8 TTLL6 LRRK2 HDAC4 ATRX GRWD1 MCM8 NAT10 DAPK3 FARP2 JMJD6 EYA1 PTPRS KPTN FLNB BRCA2 SGF29 MSH2 HMCN1 NEMP1 ATG4B MTCH2 FGD6
0.0453803	3	58	12.201	GO:0007157 heterophilic cell-cell adhesion via plasma membrane cell adhesion molecules	http://amigo.geneontology.org/amigo/term/GO:0007157	HMCN1 FAT4 CD209
0.0458031	9	660	3.21664	GO:0031344 regulation of cell projection organization	http://amigo.geneontology.org/amigo/term/GO:0031344	ULK2 LRRK2 DSCAM ROBO2 CNTN1 HDAC4 PTPRS CENPJ RYK
0.0460794	4	125	7.54837	GO:0042542 response to hydrogen peroxide	http://amigo.geneontology.org/amigo/term/GO:0042542	TRPA1 NET1 RIPK1 LRRK2
0.0460874	2	16	29.4858	GO:0009886 post-embryonic animal morphogenesis	http://amigo.geneontology.org/amigo/term/GO:0009886	ATRX DSCAM
0.0460874	16	1700	2.22011	GO:0045595 regulation of cell differentiation	http://amigo.geneontology.org/amigo/term/GO:0045595	ULK2 TAF8 DSCAM ROBO2 HDAC4 RIPK2 EYA1 PTPRS BOC RYK FAT4 USH2A RIPK1 LRRK2 FGFR2 MTCH2
0.0460874	9	663	3.20208	GO:0048729 tissue morphogenesis	http://amigo.geneontology.org/amigo/term/GO:0048729	TIE1 FGFR2 EYA1 FRAS1 RYK TTC8 CSMD1 FAT4 ROBO2
0.0460874	2	16	29.4858	GO:0072520 seminiferous tubule development	http://amigo.geneontology.org/amigo/term/GO:0072520	ATRX WDR48
0.0476973	6	312	4.53628	GO:0006302 double-strand break repair	http://amigo.geneontology.org/amigo/term/GO:0006302	REV3L WDR48 MCM8 BRCA2 MSH2 EYA1
0.0476973	12	1088	2.60169	GO:0009894 regulation of catabolic process	http://amigo.geneontology.org/amigo/term/GO:0009894	ULK2 LRRK2 UBXN1 FBP1 HDAC4 RIPK2 AGO3 NPC1 TTC5 TMTC3 DAPK1 DAPK3
0.0488731	4	129	7.31431	GO:0048675 axon extension	http://amigo.geneontology.org/amigo/term/GO:0048675	ULK2 DSCAM PTPRS RYK
0.0504857	2	17	27.7514	GO:0070593 dendrite self-avoidance	http://amigo.geneontology.org/amigo/term/GO:0070593	CNTN6 DSCAM
0.050514	8	550	3.43108	GO:0002009 morphogenesis of an epithelium	http://amigo.geneontology.org/amigo/term/GO:0002009	TIE1 EYA1 FRAS1 RYK TTC8 CSMD1 FAT4 FGFR2
0.050514	15	1563	2.26379	GO:0120036 plasma membrane bounded cell projection organization	http://amigo.geneontology.org/amigo/term/GO:0120036	CNTN1 ULK2 CNTN6 BOC CENPJ RYK TTC8 DSCAM ROBO2 LRRK2 HDAC4 PTPRS FAT4 FGFR2 FGD6
0.0527529	24	3133	1.80698	GO:0033036 macromolecule localization	http://amigo.geneontology.org/amigo/term/GO:0033036	OXA1L XPOT LRRK2 IPO7 CSK TAF8 BRCA2 NPC1 MVP USH2A ATRX ATG4A FRAS1 TTC8 ATG4B PLRG1 MX2 MSH2 MTCH2 KPTN MCM8 CENPJ CPT2 SGF29
0.0559978	20	2427	1.94385	GO:0048584 positive regulation of response to stimulus	http://amigo.geneontology.org/amigo/term/GO:0048584	CSK RIPK2 EYA1 LRRK1 NET1 IRAK4 LRRK2 WDR48 RIPK1 CENPJ RYK DSCAM MSH2 ZNFX1 AGO3 CNTN6 OXSR1 FGFR2 DAPK3 ROBO2
0.0563296	8	562	3.35782	GO:0001501 skeletal system development	http://amigo.geneontology.org/amigo/term/GO:0001501	FGFR2 HDAC4 EYA1 WDR48 LRRK1 RYK FAT4 TLL1
0.0567644	18	2086	2.03545	GO:0009888 tissue development	http://amigo.geneontology.org/amigo/term/GO:0009888	USH2A SVEP1 BRCA2 TIE1 FGFR2 HDAC4 ATRX EYA1 PTPRS FLNB FRAS1 PTPRQ RYK TTC8 CSMD1 FAT4 ROBO2 ATG4B
0.0571883	11	975	2.66128	GO:0022603 regulation of anatomical structure morphogenesis	http://amigo.geneontology.org/amigo/term/GO:0022603	TIE1 ULK2 LRRK2 DSCAM ROBO2 PTPRS RYK DAPK3 FGFR2 MTCH2 FGD6
0.0571883	3	66	10.7221	GO:0050771 negative regulation of axonogenesis	http://amigo.geneontology.org/amigo/term/GO:0050771	ULK2 PTPRS RYK
0.0576833	7	444	3.71893	GO:0010975 regulation of neuron projection development	http://amigo.geneontology.org/amigo/term/GO:0010975	ULK2 LRRK2 DSCAM ROBO2 CNTN1 PTPRS RYK
0.058182	22	2805	1.85009	GO:0009056 catabolic process	http://amigo.geneontology.org/amigo/term/GO:0009056	ULK2 GGT1 PSMD7 SARDH DPYS CPT2 WDR26 CLPX LRRK2 ATG4A AGO3 RIPK1 UBXN1 FBP1 ATG4B HDAC4 RIPK2 NPC1 TTC5 TMTC3 DAPK1 DAPK3
0.058182	3	67	10.5621	GO:0060042 retina morphogenesis in camera-type eye	http://amigo.geneontology.org/amigo/term/GO:0060042	SDK2 TTC8 DSCAM
0.058182	2	19	24.8302	GO:1900543 negative regulation of purine nucleotide metabolic process	http://amigo.geneontology.org/amigo/term/GO:1900543	FBP1 HDAC4
0.0588466	4	140	6.73962	GO:0010977 negative regulation of neuron projection development	http://amigo.geneontology.org/amigo/term/GO:0010977	ULK2 PTPRS RYK LRRK2
0.0588466	8	572	3.29911	GO:0051052 regulation of DNA metabolic process	http://amigo.geneontology.org/amigo/term/GO:0051052	EYA1 SGF29 MSH2 WDR48 PIF1 ATRX BRCA2 NAT10
0.0588886	24	3183	1.7786	GO:0002376 immune system process	http://amigo.geneontology.org/amigo/term/GO:0002376	MSH2 GGT1 CSK RIPK2 CD209 DAPK3 DAPK1 FARP2 JMJD6 ZNFX1 FLNB PTPRQ BRCA2 LRRK1 OXSR1 MX2 LRRK2 IRAK4 IPO7 MRC1 PTPRS RIPK1 FGFR2 HDAC4
0.0588886	15	1606	2.20317	GO:0030030 cell projection organization	http://amigo.geneontology.org/amigo/term/GO:0030030	CNTN1 ULK2 CNTN6 BOC CENPJ RYK TTC8 DSCAM ROBO2 LRRK2 HDAC4 PTPRS FAT4 FGFR2 FGD6
0.0588886	3	68	10.4068	GO:0046530 photoreceptor cell differentiation	http://amigo.geneontology.org/amigo/term/GO:0046530	SDK2 TTC8 DSCAM
0.0590632	7	451	3.66121	GO:0048608 reproductive structure development	http://amigo.geneontology.org/amigo/term/GO:0048608	ATRX MSH2 WDR48 BRCA2 CSMD1 ROBO2 FGFR2
0.0590638	8	576	3.2762	GO:0043068 positive regulation of programmed cell death	http://amigo.geneontology.org/amigo/term/GO:0043068	MTCH2 DAPK3 DAPK1 RIPK1 NET1 LRRK2 HDAC4 RIPK2
0.0590638	30	4338	1.6313	GO:0048583 regulation of response to stimulus	http://amigo.geneontology.org/amigo/term/GO:0048583	GGT1 CSK RIPK2 EYA1 KPTN LRRK1 NET1 LRRK2 IRAK4 BRCA2 SGF29 MVP WDR48 RIPK1 CENPJ RYK FBP1 DSCAM ROBO2 DAPK1 HDAC4 MSH2 PTPRS ZNFX1 AGO3 CNTN6 OXSR1 FGFR2 UBXN1 DAPK3
0.0602222	2	20	23.5887	GO:0045980 negative regulation of nucleotide metabolic process	http://amigo.geneontology.org/amigo/term/GO:0045980	FBP1 HDAC4
0.0603723	7	455	3.62902	GO:0061458 reproductive system development	http://amigo.geneontology.org/amigo/term/GO:0061458	ATRX MSH2 WDR48 BRCA2 CSMD1 ROBO2 FGFR2
0.0607055	7	456	3.62107	GO:0045936 negative regulation of phosphate metabolic process	http://amigo.geneontology.org/amigo/term/GO:0045936	MVP FBP1 HDAC4 CSK LRRK1 LRRK2 IPO7
0.0610412	7	457	3.61314	GO:0010563 negative regulation of phosphorus metabolic process	http://amigo.geneontology.org/amigo/term/GO:0010563	MVP FBP1 HDAC4 CSK LRRK1 LRRK2 IPO7
0.0628023	8	589	3.20389	GO:0006914 autophagy	http://amigo.geneontology.org/amigo/term/GO:0006914	ULK2 LRRK2 ATG4A ATG4B RIPK2 NPC1 DAPK1 DAPK3
0.0628023	2	21	22.4654	GO:0008340 determination of adult lifespan	http://amigo.geneontology.org/amigo/term/GO:0008340	MSH2 LRRK2
0.0628023	4	146	6.46265	GO:0030177 positive regulation of Wnt signaling pathway	http://amigo.geneontology.org/amigo/term/GO:0030177	LRRK1 LRRK2 DAPK3 FGFR2
0.0628023	4	147	6.41868	GO:0034614 cellular response to reactive oxygen species	http://amigo.geneontology.org/amigo/term/GO:0034614	TRPA1 NET1 RIPK1 LRRK2
0.0628023	16	1795	2.10261	GO:0045184 establishment of protein localization	http://amigo.geneontology.org/amigo/term/GO:0045184	OXA1L IPO7 LRRK2 CSK BRCA2 NPC1 MVP USH2A ATG4A FRAS1 TTC8 ATG4B MX2 XPOT CENPJ SGF29
0.0628023	2	21	22.4654	GO:0048670 regulation of collateral sprouting	http://amigo.geneontology.org/amigo/term/GO:0048670	ULK2 PTPRS
0.0628023	8	589	3.20389	GO:0061919 process utilizing autophagic mechanism	http://amigo.geneontology.org/amigo/term/GO:0061919	ULK2 LRRK2 ATG4A ATG4B RIPK2 NPC1 DAPK1 DAPK3
0.0636441	4	148	6.37531	GO:0008584 male gonad development	http://amigo.geneontology.org/amigo/term/GO:0008584	ATRX MSH2 WDR48 CSMD1
0.0636441	4	149	6.33253	GO:0010212 response to ionizing radiation	http://amigo.geneontology.org/amigo/term/GO:0010212	EYA1 NET1 MSH2 BRCA2
0.0636441	14	1478	2.23438	GO:0019220 regulation of phosphate metabolic process	http://amigo.geneontology.org/amigo/term/GO:0019220	TIE1 FGFR2 RYK LRRK2 MVP RIPK2 FBP1 DSCAM CNTN1 HDAC4 CSK RIPK1 LRRK1 IPO7
0.0636441	4	149	6.33253	GO:0046546 development of primary male sexual characteristics	http://amigo.geneontology.org/amigo/term/GO:0046546	ATRX MSH2 WDR48 CSMD1
0.0636441	21	2680	1.84837	GO:0050793 regulation of developmental process	http://amigo.geneontology.org/amigo/term/GO:0050793	TIE1 ULK2 LRRK2 SGF29 TAF8 DSCAM ROBO2 HDAC4 MSH2 RIPK2 EYA1 PTPRS BOC RYK DAPK3 FAT4 USH2A RIPK1 FGFR2 MTCH2 FGD6
0.0636441	14	1479	2.23287	GO:0051174 regulation of phosphorus metabolic process	http://amigo.geneontology.org/amigo/term/GO:0051174	TIE1 FGFR2 RYK LRRK2 MVP RIPK2 FBP1 DSCAM CNTN1 HDAC4 CSK RIPK1 LRRK1 IPO7
0.0639248	2	22	21.4442	GO:0001832 blastocyst growth	http://amigo.geneontology.org/amigo/term/GO:0001832	TAF8 BRCA2
0.0639248	3	74	9.56297	GO:0006278 RNA-templated DNA biosynthetic process	http://amigo.geneontology.org/amigo/term/GO:0006278	PIF1 TEP1 NAT10
0.0639248	2	22	21.4442	GO:0032211 negative regulation of telomere maintenance via telomerase	http://amigo.geneontology.org/amigo/term/GO:0032211	PIF1 NAT10
0.0639248	5	244	4.83374	GO:0060560 developmental growth involved in morphogenesis	http://amigo.geneontology.org/amigo/term/GO:0060560	ULK2 DSCAM PTPRS RYK FGFR2
0.0639248	3	74	9.56297	GO:0061180 mammary gland epithelium development	http://amigo.geneontology.org/amigo/term/GO:0061180	BRCA2 CSMD1 FGFR2
0.064193	4	151	6.24865	GO:0072073 kidney epithelium development	http://amigo.geneontology.org/amigo/term/GO:0072073	EYA1 FAT4 ROBO2 FGFR2
0.0645967	10	876	2.69277	GO:0042327 positive regulation of phosphorylation	http://amigo.geneontology.org/amigo/term/GO:0042327	TIE1 FGFR2 RYK LRRK2 RIPK2 DSCAM CNTN1 CSK RIPK1 LRRK1
0.0645967	3	75	9.43546	GO:0048645 animal organ formation	http://amigo.geneontology.org/amigo/term/GO:0048645	EYA1 FGFR2 ROBO2
0.0645967	4	152	6.20754	GO:0051053 negative regulation of DNA metabolic process	http://amigo.geneontology.org/amigo/term/GO:0051053	MSH2 PIF1 BRCA2 NAT10
0.0648143	17	1992	2.01309	GO:0040011 locomotion	http://amigo.geneontology.org/amigo/term/GO:0040011	CNTN1 USH2A CNTN6 BOC DSCAM ROBO2 FAT2 TIE1 HDAC4 RYK TTC8 DAPK3 TTLL6 OXSR1 NET1 LRRK2 IRAK4
0.0655875	7	476	3.46892	GO:0006979 response to oxidative stress	http://amigo.geneontology.org/amigo/term/GO:0006979	TRPA1 NET1 RIPK1 OXSR1 MT-CO1 LRRK2 DAPK1
0.0655875	9	739	2.87277	GO:0034330 cell junction organization	http://amigo.geneontology.org/amigo/term/GO:0034330	SDK2 CSK PTPRS LRRK2 DAPK3 SVEP1 DSCAM ROBO2 RYK
0.0659841	4	154	6.12692	GO:0010508 positive regulation of autophagy	http://amigo.geneontology.org/amigo/term/GO:0010508	ULK2 LRRK2 RIPK2 DAPK1
0.0659841	2	23	20.5119	GO:0034162 toll-like receptor 9 signaling pathway	http://amigo.geneontology.org/amigo/term/GO:0034162	PTPRS IRAK4
0.0659841	2	23	20.5119	GO:0036303 lymph vessel morphogenesis	http://amigo.geneontology.org/amigo/term/GO:0036303	SVEP1 TIE1
0.0661794	3	77	9.19039	GO:0003151 outflow tract morphogenesis	http://amigo.geneontology.org/amigo/term/GO:0003151	EYA1 FGFR2 ROBO2
0.0661794	3	77	9.19039	GO:0051298 centrosome duplication	http://amigo.geneontology.org/amigo/term/GO:0051298	CENPJ NAT10 BRCA2
0.0704883	4	158	5.97181	GO:0051961 negative regulation of nervous system development	http://amigo.geneontology.org/amigo/term/GO:0051961	ULK2 PTPRS RYK ROBO2
0.0730956	9	756	2.80817	GO:0030855 epithelial cell differentiation	http://amigo.geneontology.org/amigo/term/GO:0030855	USH2A TIE1 ATRX PTPRS FLNB PTPRQ TTC8 FAT4 FGFR2
0.0733624	6	369	3.83555	GO:0010506 regulation of autophagy	http://amigo.geneontology.org/amigo/term/GO:0010506	ULK2 LRRK2 RIPK2 NPC1 DAPK1 DAPK3
0.0733624	6	369	3.83555	GO:0062197 cellular response to chemical stress	http://amigo.geneontology.org/amigo/term/GO:0062197	TRPA1 NET1 RIPK1 OXSR1 LRRK2 DAPK1
0.074536	2	25	18.8709	GO:0003148 outflow tract septum morphogenesis	http://amigo.geneontology.org/amigo/term/GO:0003148	FGFR2 ROBO2
0.074536	2	25	18.8709	GO:1903205 regulation of hydrogen peroxide-induced cell death	http://amigo.geneontology.org/amigo/term/GO:1903205	RIPK1 LRRK2
0.0772182	20	2575	1.83213	GO:0032268 regulation of cellular protein metabolic process	http://amigo.geneontology.org/amigo/term/GO:0032268	ELP4 LRRK2 MVP HDAC4 RIPK2 AGO3 NAT10 UBXN1 DAPK3 DAPK1 CNTN1 CSK WDR48 LRRK1 CLPX ATRX RIPK1 TMTC3 SGF29 IPO7
0.0774469	4	164	5.75333	GO:0006261 DNA-templated DNA replication	http://amigo.geneontology.org/amigo/term/GO:0006261	MCM8 ATRX BRCA2 REV3L
0.0776461	3	83	8.52602	GO:0003407 neural retina development	http://amigo.geneontology.org/amigo/term/GO:0003407	SDK2 TTC8 DSCAM
0.0776461	19	2402	1.86588	GO:0044248 cellular catabolic process	http://amigo.geneontology.org/amigo/term/GO:0044248	ULK2 GGT1 PSMD7 SARDH DPYS CPT2 WDR26 LRRK2 ATG4A AGO3 UBXN1 CLPX ATG4B RIPK2 NPC1 TTC5 TMTC3 DAPK1 DAPK3
0.0776461	4	165	5.71846	GO:0060041 retina development in camera-type eye	http://amigo.geneontology.org/amigo/term/GO:0060041	SDK2 JMJD6 TTC8 DSCAM
0.0776461	4	165	5.71846	GO:0071346 cellular response to interferon-gamma	http://amigo.geneontology.org/amigo/term/GO:0071346	DAPK3 DAPK1 FLNB MRC1
0.0776642	2	26	18.1451	GO:0048668 collateral sprouting	http://amigo.geneontology.org/amigo/term/GO:0048668	ULK2 PTPRS
0.078026	7	501	3.29582	GO:0031331 positive regulation of cellular catabolic process	http://amigo.geneontology.org/amigo/term/GO:0031331	ULK2 LRRK2 RIPK2 AGO3 TTC5 TMTC3 DAPK1
0.078026	3	84	8.42452	GO:0061912 selective autophagy	http://amigo.geneontology.org/amigo/term/GO:0061912	ULK2 RIPK2 ATG4B
0.0783689	10	918	2.56957	GO:0031329 regulation of cellular catabolic process	http://amigo.geneontology.org/amigo/term/GO:0031329	ULK2 LRRK2 UBXN1 RIPK2 AGO3 NPC1 TTC5 TMTC3 DAPK1 DAPK3
0.0807766	2	27	17.4731	GO:0010842 retina layer formation	http://amigo.geneontology.org/amigo/term/GO:0010842	SDK2 DSCAM
0.0807766	2	27	17.4731	GO:0051354 negative regulation of oxidoreductase activity	http://amigo.geneontology.org/amigo/term/GO:0051354	LRRK2 OXA1L
0.0807766	2	27	17.4731	GO:0070199 establishment of protein localization to chromosome	http://amigo.geneontology.org/amigo/term/GO:0070199	BRCA2 SGF29
0.0807766	2	27	17.4731	GO:1903579 negative regulation of ATP metabolic process	http://amigo.geneontology.org/amigo/term/GO:1903579	FBP1 HDAC4
0.081171	5	270	4.36827	GO:1903320 regulation of protein modification by small protein conjugation or removal	http://amigo.geneontology.org/amigo/term/GO:1903320	HDAC4 UBXN1 LRRK2 WDR48 RIPK2
0.0819233	9	782	2.71481	GO:0080135 regulation of cellular response to stress	http://amigo.geneontology.org/amigo/term/GO:0080135	EYA1 BRCA2 SGF29 WDR48 RIPK1 RIPK2 PTPRS UBXN1 LRRK2
0.0831529	4	171	5.51782	GO:0046661 male sex differentiation	http://amigo.geneontology.org/amigo/term/GO:0046661	ATRX MSH2 WDR48 CSMD1
0.0839014	18	2254	1.88374	GO:0006928 movement of cell or subcellular component	http://amigo.geneontology.org/amigo/term/GO:0006928	CNTN1 USH2A CNTN6 BOC DSCAM ROBO2 FAT2 TIE1 HDAC4 ABCC9 RYK TTC8 DAPK3 TTLL6 OXSR1 NET1 LRRK2 IRAK4
0.0867064	8	650	2.90322	GO:0010942 positive regulation of cell death	http://amigo.geneontology.org/amigo/term/GO:0010942	MTCH2 DAPK3 DAPK1 RIPK2 RIPK1 NET1 LRRK2 HDAC4
0.0883729	10	941	2.50677	GO:0048609 multicellular organismal reproductive process	http://amigo.geneontology.org/amigo/term/GO:0048609	HDAC4 ATRX MSH2 WDR48 MCM8 BRCA2 CSMD1 LRRK2 ROBO2 GGT1
0.0897584	4	176	5.36106	GO:0000724 double-strand break repair via homologous recombination	http://amigo.geneontology.org/amigo/term/GO:0000724	REV3L WDR48 MCM8 BRCA2
0.0897584	2	29	16.268	GO:0036474 cell death in response to hydrogen peroxide	http://amigo.geneontology.org/amigo/term/GO:0036474	RIPK1 LRRK2
0.0942058	2	30	15.7258	GO:0001945 lymph vessel development	http://amigo.geneontology.org/amigo/term/GO:0001945	SVEP1 TIE1
0.0942058	28	4181	1.57972	GO:0009893 positive regulation of metabolic process	http://amigo.geneontology.org/amigo/term/GO:0009893	TIE1 FGFR2 ULK2 EYA1 RYK LRRK2 SGF29 HDAC4 JMJD6 RIPK2 WDR48 NAT10 RIPK1 TAF8 BRCA2 DSCAM DAPK1 CNTN1 ATRX MSH2 CSK AGO3 TTC5 CENPJ LRRK1 CPT2 CLPX TMTC3
0.0942058	2	30	15.7258	GO:1904357 negative regulation of telomere maintenance via telomere lengthening	http://amigo.geneontology.org/amigo/term/GO:1904357	PIF1 NAT10
0.0947923	4	180	5.24192	GO:0000725 recombinational repair	http://amigo.geneontology.org/amigo/term/GO:0000725	REV3L WDR48 MCM8 BRCA2
0.0947923	4	180	5.24192	GO:1990138 neuron projection extension	http://amigo.geneontology.org/amigo/term/GO:1990138	ULK2 DSCAM PTPRS RYK
0.0955214	7	530	3.11548	GO:0060284 regulation of cell development	http://amigo.geneontology.org/amigo/term/GO:0060284	ULK2 DSCAM ROBO2 HDAC4 PTPRS RYK LRRK2
0.0972266	10	961	2.4546	GO:0010562 positive regulation of phosphorus metabolic process	http://amigo.geneontology.org/amigo/term/GO:0010562	TIE1 FGFR2 RYK LRRK2 RIPK2 DSCAM CNTN1 CSK RIPK1 LRRK1
0.0972266	10	961	2.4546	GO:0045937 positive regulation of phosphate metabolic process	http://amigo.geneontology.org/amigo/term/GO:0045937	TIE1 FGFR2 RYK LRRK2 RIPK2 DSCAM CNTN1 CSK RIPK1 LRRK1
0.0986297	8	672	2.80817	GO:0006935 chemotaxis	http://amigo.geneontology.org/amigo/term/GO:0006935	CNTN1 CNTN6 BOC DSCAM ROBO2 RYK TTC8 OXSR1
0.0986297	3	95	7.44905	GO:0009791 post-embryonic development	http://amigo.geneontology.org/amigo/term/GO:0009791	ATRX DSCAM FGFR2
0.0986297	10	965	2.44442	GO:0032504 multicellular organism reproduction	http://amigo.geneontology.org/amigo/term/GO:0032504	HDAC4 ATRX MSH2 WDR48 MCM8 BRCA2 CSMD1 LRRK2 ROBO2 GGT1
0.10006	6	411	3.4436	GO:0001701 in utero embryonic development	http://amigo.geneontology.org/amigo/term/GO:0001701	TIE1 MSH2 TAF8 BRCA2 CPT2 FGFR2
0.10006	2	32	14.7429	GO:0010165 response to X-ray	http://amigo.geneontology.org/amigo/term/GO:0010165	MSH2 BRCA2
0.10006	22	3057	1.69758	GO:0010605 negative regulation of macromolecule metabolic process	http://amigo.geneontology.org/amigo/term/GO:0010605	HDAC4 ZNFX1 AGO3 LRRK2 MVP MSH2 RIPK1 PIF1 UBXN1 DAPK3 DAPK1 ATRX CSK BRCA2 LRRK1 FOCAD PTPRS NAT10 TTC5 FBP1 FGFR2 IPO7
0.10006	2	32	14.7429	GO:0035335 peptidyl-tyrosine dephosphorylation	http://amigo.geneontology.org/amigo/term/GO:0035335	EYA1 PTPRS
0.10006	31	4821	1.5168	GO:0042221 response to chemical	http://amigo.geneontology.org/amigo/term/GO:0042221	CNTN1 CNTN6 BOC DSCAM ROBO2 LRRK2 IRAK4 RIPK1 FGFR2 RIPK2 TRPA1 FBP1 DAPK3 NET1 MX2 DAPK1 TIE1 HDAC4 ATRX CSK FLNB NPC1 GRIA1 RYK TTC8 OXSR1 FAT4 MT-CO1 MRC1 ABCC9 UBXN1
0.10006	8	676	2.79156	GO:0042330 taxis	http://amigo.geneontology.org/amigo/term/GO:0042330	CNTN1 CNTN6 BOC DSCAM ROBO2 RYK TTC8 OXSR1
0.10006	4	186	5.07283	GO:0050954 sensory perception of mechanical stimulus	http://amigo.geneontology.org/amigo/term/GO:0050954	USH2A TRPA1 PTPRQ EYA1
0.10006	2	32	14.7429	GO:0070198 protein localization to chromosome telomeric region	http://amigo.geneontology.org/amigo/term/GO:0070198	BRCA2 ATRX
0.101509	7	543	3.0409	GO:0016570 histone modification	http://amigo.geneontology.org/amigo/term/GO:0016570	HDAC4 EYA1 SGF29 BRCA2 JMJD6 LRRK2 ATRX
0.101509	3	98	7.22102	GO:0030516 regulation of axon extension	http://amigo.geneontology.org/amigo/term/GO:0030516	DSCAM PTPRS RYK
0.101509	3	98	7.22102	GO:0032508 DNA duplex unwinding	http://amigo.geneontology.org/amigo/term/GO:0032508	PIF1 MCM8 ATRX
0.10218	2	33	14.2962	GO:0003180 aortic valve morphogenesis	http://amigo.geneontology.org/amigo/term/GO:0003180	TIE1 ROBO2
0.10218	4	189	4.99231	GO:0034341 response to interferon-gamma	http://amigo.geneontology.org/amigo/term/GO:0034341	DAPK3 DAPK1 FLNB MRC1
0.10218	3	99	7.14808	GO:0048661 positive regulation of smooth muscle cell proliferation	http://amigo.geneontology.org/amigo/term/GO:0048661	FGFR2 HDAC4 IRAK4
0.10218	19	2509	1.78631	GO:0051128 regulation of cellular component organization	http://amigo.geneontology.org/amigo/term/GO:0051128	ULK2 LRRK2 CENPJ NAT10 PIF1 FBP1 DAPK3 DSCAM ROBO2 FARP2 CNTN1 TIE1 HDAC4 ATRX PTPRS RYK TTC8 MTCH2 NET1
0.10218	2	33	14.2962	GO:0060603 mammary gland duct morphogenesis	http://amigo.geneontology.org/amigo/term/GO:0060603	CSMD1 FGFR2
0.103241	4	190	4.96603	GO:0031345 negative regulation of cell projection organization	http://amigo.geneontology.org/amigo/term/GO:0031345	ULK2 PTPRS RYK LRRK2
0.103816	4	191	4.94003	GO:0007254 JNK cascade	http://amigo.geneontology.org/amigo/term/GO:0007254	RIPK1 LRRK2 RIPK2 IRAK4
0.103816	4	191	4.94003	GO:0008361 regulation of cell size	http://amigo.geneontology.org/amigo/term/GO:0008361	ULK2 DSCAM PTPRS RYK
0.103816	3	100	7.0766	GO:2001251 negative regulation of chromosome organization	http://amigo.geneontology.org/amigo/term/GO:2001251	PIF1 ATRX NAT10
0.105452	2	34	13.8757	GO:0048841 regulation of axon extension involved in axon guidance	http://amigo.geneontology.org/amigo/term/GO:0048841	DSCAM RYK
0.105452	2	34	13.8757	GO:1901031 regulation of response to reactive oxygen species	http://amigo.geneontology.org/amigo/term/GO:1901031	RIPK1 LRRK2
0.106976	23	3283	1.65257	GO:0009892 negative regulation of metabolic process	http://amigo.geneontology.org/amigo/term/GO:0009892	HDAC4 ZNFX1 AGO3 LRRK2 MVP MSH2 RIPK1 PIF1 UBXN1 FBP1 DAPK3 DAPK1 ATRX CSK BRCA2 NPC1 LRRK1 FOCAD PTPRS NAT10 TTC5 FGFR2 IPO7
0.107001	10	992	2.37789	GO:0006974 cellular response to DNA damage stimulus	http://amigo.geneontology.org/amigo/term/GO:0006974	REV3L MSH2 EYA1 WDR48 MCM8 BRCA2 SGF29 ATRX TTC5 PIF1
0.107135	14	1645	2.00755	GO:0009967 positive regulation of signal transduction	http://amigo.geneontology.org/amigo/term/GO:0009967	RIPK2 LRRK1 NET1 IRAK4 LRRK2 RIPK1 CENPJ RYK CSK AGO3 CNTN6 FGFR2 DAPK3 ROBO2
0.108009	2	35	13.4792	GO:0006301 postreplication repair	http://amigo.geneontology.org/amigo/term/GO:0006301	REV3L MSH2
0.108009	2	35	13.4792	GO:0032607 interferon-alpha production	http://amigo.geneontology.org/amigo/term/GO:0032607	PTPRS RIPK2
0.108009	2	35	13.4792	GO:0032647 regulation of interferon-alpha production	http://amigo.geneontology.org/amigo/term/GO:0032647	PTPRS RIPK2
0.108009	2	35	13.4792	GO:0034260 negative regulation of GTPase activity	http://amigo.geneontology.org/amigo/term/GO:0034260	LRRK2 TTC8
0.108009	2	35	13.4792	GO:0050974 detection of mechanical stimulus involved in sensory perception	http://amigo.geneontology.org/amigo/term/GO:0050974	TRPA1 PTPRQ
0.108481	4	196	4.81401	GO:0007219 Notch signaling pathway	http://amigo.geneontology.org/amigo/term/GO:0007219	CNTN1 CNTN6 FAT4 ROBO2
0.108684	8	701	2.692	GO:0006325 chromatin organization	http://amigo.geneontology.org/amigo/term/GO:0006325	ZNFX1 HDAC4 ATRX GRWD1 JMJD6 EYA1 DAPK3 SGF29
0.108684	3	104	6.80442	GO:0032392 DNA geometric change	http://amigo.geneontology.org/amigo/term/GO:0032392	PIF1 MCM8 ATRX
0.108684	3	104	6.80442	GO:0061326 renal tubule development	http://amigo.geneontology.org/amigo/term/GO:0061326	EYA1 TTC8 FAT4
0.108726	10	1001	2.35651	GO:0030097 hemopoiesis	http://amigo.geneontology.org/amigo/term/GO:0030097	FARP2 JMJD6 MSH2 RIPK2 PTPRQ BRCA2 LRRK1 RIPK1 FGFR2 HDAC4
0.109963	7	563	2.93287	GO:0043065 positive regulation of apoptotic process	http://amigo.geneontology.org/amigo/term/GO:0043065	MTCH2 DAPK3 DAPK1 RIPK1 NET1 HDAC4 RIPK2
0.110235	3	105	6.73962	GO:0008585 female gonad development	http://amigo.geneontology.org/amigo/term/GO:0008585	BRCA2 CSMD1 ROBO2
0.11117	4	199	4.74144	GO:0030308 negative regulation of cell growth	http://amigo.geneontology.org/amigo/term/GO:0030308	ULK2 FBP1 PTPRS RYK
0.111812	3	106	6.67604	GO:0016575 histone deacetylation	http://amigo.geneontology.org/amigo/term/GO:0016575	HDAC4 LRRK2 SGF29
0.111812	3	106	6.67604	GO:0021549 cerebellum development	http://amigo.geneontology.org/amigo/term/GO:0021549	CNTN1 PTPRS MT-CO1
0.112253	4	202	4.67102	GO:0000302 response to reactive oxygen species	http://amigo.geneontology.org/amigo/term/GO:0000302	TRPA1 NET1 RIPK1 LRRK2
0.112253	6	453	3.12433	GO:0001558 regulation of cell growth	http://amigo.geneontology.org/amigo/term/GO:0001558	ULK2 FBP1 DSCAM PTPRS RYK NET1
0.112253	2	38	12.4151	GO:0003176 aortic valve development	http://amigo.geneontology.org/amigo/term/GO:0003176	TIE1 ROBO2
0.112253	1	3	78.6289	GO:0006208 pyrimidine nucleobase catabolic process	http://amigo.geneontology.org/amigo/term/GO:0006208	DPYS
0.112253	1	3	78.6289	GO:0006210 thymine catabolic process	http://amigo.geneontology.org/amigo/term/GO:0006210	DPYS
0.112253	1	3	78.6289	GO:0006409 tRNA export from nucleus	http://amigo.geneontology.org/amigo/term/GO:0006409	XPOT
0.112253	16	2031	1.85829	GO:0006952 defense response	http://amigo.geneontology.org/amigo/term/GO:0006952	GGT1 RIPK2 MX2 DAPK3 DAPK1 CD209 ZNFX1 FLNB RIPK1 LRRK2 IRAK4 IPO7 MRC1 ABCC9 HDAC4 TPST1
0.112253	4	209	4.51458	GO:0007626 locomotory behavior	http://amigo.geneontology.org/amigo/term/GO:0007626	CNTN1 NPC1 DSCAM LRRK2
0.112253	11	1189	2.1823	GO:0009790 embryo development	http://amigo.geneontology.org/amigo/term/GO:0009790	SGF29 TIE1 FGFR2 MSH2 EYA1 WDR48 TAF8 FRAS1 PTPRQ BRCA2 CPT2
0.112253	7	586	2.81776	GO:0009896 positive regulation of catabolic process	http://amigo.geneontology.org/amigo/term/GO:0009896	ULK2 LRRK2 RIPK2 AGO3 TTC5 TMTC3 DAPK1
0.112253	2	37	12.7506	GO:0016242 negative regulation of macroautophagy	http://amigo.geneontology.org/amigo/term/GO:0016242	LRRK2 NPC1
0.112253	3	112	6.31839	GO:0016441 post-transcriptional gene silencing	http://amigo.geneontology.org/amigo/term/GO:0016441	AGO3 RIPK1 FOCAD
0.112253	6	454	3.11744	GO:0018205 peptidyl-lysine modification	http://amigo.geneontology.org/amigo/term/GO:0018205	SGF29 HDAC4 JMJD6 BRCA2 EYA1 ATRX
0.112253	1	3	78.6289	GO:0019344 cysteine biosynthetic process	http://amigo.geneontology.org/amigo/term/GO:0019344	GGT1
0.112253	1	3	78.6289	GO:0019859 thymine metabolic process	http://amigo.geneontology.org/amigo/term/GO:0019859	DPYS
0.112253	1	3	78.6289	GO:0019860 uracil metabolic process	http://amigo.geneontology.org/amigo/term/GO:0019860	DPYS
0.112253	1	3	78.6289	GO:0021769 orbitofrontal cortex development	http://amigo.geneontology.org/amigo/term/GO:0021769	FGFR2
0.112253	1	3	78.6289	GO:0031179 peptide modification	http://amigo.geneontology.org/amigo/term/GO:0031179	GGT1
0.112253	3	113	6.26248	GO:0032204 regulation of telomere maintenance	http://amigo.geneontology.org/amigo/term/GO:0032204	PIF1 ATRX NAT10
0.112253	2	38	12.4151	GO:0032205 negative regulation of telomere maintenance	http://amigo.geneontology.org/amigo/term/GO:0032205	PIF1 NAT10
0.112253	2	38	12.4151	GO:0033260 nuclear DNA replication	http://amigo.geneontology.org/amigo/term/GO:0033260	ATRX BRCA2
0.112253	1	3	78.6289	GO:0034092 negative regulation of maintenance of sister chromatid cohesion	http://amigo.geneontology.org/amigo/term/GO:0034092	ATRX
0.112253	10	1032	2.28572	GO:0034097 response to cytokine	http://amigo.geneontology.org/amigo/term/GO:0034097	IRAK4 RIPK1 DAPK3 MX2 DAPK1 HDAC4 RIPK2 FLNB OXSR1 MRC1
0.112253	1	3	78.6289	GO:0034183 negative regulation of maintenance of mitotic sister chromatid cohesion	http://amigo.geneontology.org/amigo/term/GO:0034183	ATRX
0.112253	5	315	3.74423	GO:0034599 cellular response to oxidative stress	http://amigo.geneontology.org/amigo/term/GO:0034599	TRPA1 NET1 RIPK1 LRRK2 DAPK1
0.112253	1	3	78.6289	GO:0035279 miRNA-mediated gene silencing by mRNA destabilization	http://amigo.geneontology.org/amigo/term/GO:0035279	AGO3
0.112253	1	3	78.6289	GO:0036514 dopaminergic neuron axon guidance	http://amigo.geneontology.org/amigo/term/GO:0036514	RYK
0.112253	2	37	12.7506	GO:0042219 cellular modified amino acid catabolic process	http://amigo.geneontology.org/amigo/term/GO:0042219	GGT1 SARDH
0.112253	3	114	6.20754	GO:0042472 inner ear morphogenesis	http://amigo.geneontology.org/amigo/term/GO:0042472	EYA1 PTPRQ FGFR2
0.112253	4	212	4.45069	GO:0042594 response to starvation	http://amigo.geneontology.org/amigo/term/GO:0042594	ULK2 KPTN TTC5 LRRK2
0.112253	1	3	78.6289	GO:0045299 otolith mineralization	http://amigo.geneontology.org/amigo/term/GO:0045299	ATG4B
0.112253	5	318	3.70891	GO:0046034 ATP metabolic process	http://amigo.geneontology.org/amigo/term/GO:0046034	MT-CO1 FBP1 CLPX HDAC4 MSH2
0.112253	3	109	6.49229	GO:0046545 development of primary female sexual characteristics	http://amigo.geneontology.org/amigo/term/GO:0046545	BRCA2 CSMD1 ROBO2
0.112253	2	40	11.7943	GO:0048333 mesodermal cell differentiation	http://amigo.geneontology.org/amigo/term/GO:0048333	FGFR2 EYA1
0.112253	1	3	78.6289	GO:0048560 establishment of anatomical structure orientation	http://amigo.geneontology.org/amigo/term/GO:0048560	TTC8
0.112253	5	327	3.60683	GO:0048638 regulation of developmental growth	http://amigo.geneontology.org/amigo/term/GO:0048638	ULK2 DSCAM PTPRS RYK FGFR2
0.112253	3	109	6.49229	GO:0048640 negative regulation of developmental growth	http://amigo.geneontology.org/amigo/term/GO:0048640	ULK2 PTPRS RYK
0.112253	2	38	12.4151	GO:0048846 axon extension involved in axon guidance	http://amigo.geneontology.org/amigo/term/GO:0048846	DSCAM RYK
0.112253	19	2582	1.7358	GO:0050790 regulation of catalytic activity	http://amigo.geneontology.org/amigo/term/GO:0050790	TIE1 FGFR2 RYK LRRK2 MVP MSH2 RIPK2 PIF1 UBXN1 DAPK1 FARP2 CSK ELP4 TTC8 CLPX NET1 FGD6 OXA1L IPO7
0.112253	6	454	3.11744	GO:0050808 synapse organization	http://amigo.geneontology.org/amigo/term/GO:0050808	SDK2 PTPRS LRRK2 DSCAM ROBO2 RYK
0.112253	1	3	78.6289	GO:0050968 detection of chemical stimulus involved in sensory perception of pain	http://amigo.geneontology.org/amigo/term/GO:0050968	TRPA1
0.112253	20	2795	1.68792	GO:0051246 regulation of protein metabolic process	http://amigo.geneontology.org/amigo/term/GO:0051246	ELP4 LRRK2 MVP HDAC4 RIPK2 AGO3 NAT10 UBXN1 DAPK3 DAPK1 CNTN1 CSK WDR48 LRRK1 CLPX ATRX RIPK1 TMTC3 SGF29 IPO7
0.112253	5	317	3.72061	GO:0060070 canonical Wnt signaling pathway	http://amigo.geneontology.org/amigo/term/GO:0060070	LRRK1 LRRK2 DAPK3 FGFR2 RYK
0.112253	1	3	78.6289	GO:0060114 vestibular receptor cell differentiation	http://amigo.geneontology.org/amigo/term/GO:0060114	PTPRQ
0.112253	1	3	78.6289	GO:0060118 vestibular receptor cell development	http://amigo.geneontology.org/amigo/term/GO:0060118	PTPRQ
0.112253	2	37	12.7506	GO:0060122 inner ear receptor cell stereocilium organization	http://amigo.geneontology.org/amigo/term/GO:0060122	TTC8 FAT4
0.112253	1	3	78.6289	GO:0060523 prostate epithelial cord elongation	http://amigo.geneontology.org/amigo/term/GO:0060523	FGFR2
0.112253	1	3	78.6289	GO:0060594 mammary gland specification	http://amigo.geneontology.org/amigo/term/GO:0060594	FGFR2
0.112253	1	3	78.6289	GO:0060648 mammary gland bud morphogenesis	http://amigo.geneontology.org/amigo/term/GO:0060648	FGFR2
0.112253	2	40	11.7943	GO:0060914 heart formation	http://amigo.geneontology.org/amigo/term/GO:0060914	EYA1 ROBO2
0.112253	1	3	78.6289	GO:0061364 apoptotic process involved in luteolysis	http://amigo.geneontology.org/amigo/term/GO:0061364	ROBO2
0.112253	23	3356	1.61662	GO:0065009 regulation of molecular function	http://amigo.geneontology.org/amigo/term/GO:0065009	TIE1 FGFR2 RYK LRRK2 MVP MSH2 RIPK2 PIF1 UBXN1 DAPK1 FARP2 ABCC9 CSK ELP4 RIPK1 TTC8 CLPX OXSR1 NET1 FGD6 HDAC4 OXA1L IPO7
0.112253	3	113	6.26248	GO:0071103 DNA conformation change	http://amigo.geneontology.org/amigo/term/GO:0071103	PIF1 MCM8 ATRX
0.112253	4	204	4.62523	GO:0071897 DNA biosynthetic process	http://amigo.geneontology.org/amigo/term/GO:0071897	REV3L PIF1 TEP1 NAT10
0.112253	2	38	12.4151	GO:1902284 neuron projection extension involved in neuron projection guidance	http://amigo.geneontology.org/amigo/term/GO:1902284	DSCAM RYK
0.112253	1	3	78.6289	GO:1902499 positive regulation of protein autoubiquitination	http://amigo.geneontology.org/amigo/term/GO:1902499	LRRK2
0.112253	1	3	78.6289	GO:1902822 regulation of late endosome to lysosome transport	http://amigo.geneontology.org/amigo/term/GO:1902822	LRRK2
0.112253	1	3	78.6289	GO:1903093 regulation of protein K48-linked deubiquitination	http://amigo.geneontology.org/amigo/term/GO:1903093	UBXN1
0.112253	1	3	78.6289	GO:1903335 regulation of vacuolar transport	http://amigo.geneontology.org/amigo/term/GO:1903335	LRRK2
0.112253	1	3	78.6289	GO:1904938 planar cell polarity pathway involved in axon guidance	http://amigo.geneontology.org/amigo/term/GO:1904938	RYK
0.112426	10	1042	2.26379	GO:0048534 hematopoietic or lymphoid organ development	http://amigo.geneontology.org/amigo/term/GO:0048534	FARP2 JMJD6 MSH2 RIPK2 PTPRQ BRCA2 LRRK1 RIPK1 FGFR2 HDAC4
0.113637	2	41	11.5067	GO:0060412 ventricular septum morphogenesis	http://amigo.geneontology.org/amigo/term/GO:0060412	FGFR2 ROBO2
0.113637	2	41	11.5067	GO:2000279 negative regulation of DNA biosynthetic process	http://amigo.geneontology.org/amigo/term/GO:2000279	PIF1 NAT10
0.11393	3	116	6.10052	GO:0000045 autophagosome assembly	http://amigo.geneontology.org/amigo/term/GO:0000045	ULK2 LRRK2 ATG4B
0.11393	3	116	6.10052	GO:0022037 metencephalon development	http://amigo.geneontology.org/amigo/term/GO:0022037	CNTN1 PTPRS MT-CO1
0.11393	6	457	3.09698	GO:0034329 cell junction assembly	http://amigo.geneontology.org/amigo/term/GO:0034329	SDK2 DAPK3 PTPRS DSCAM ROBO2 RYK
0.116222	3	117	6.04837	GO:0031532 actin cytoskeleton reorganization	http://amigo.geneontology.org/amigo/term/GO:0031532	DAPK3 FARP2 HMCN1
0.116487	11	1213	2.13912	GO:0051726 regulation of cell cycle	http://amigo.geneontology.org/amigo/term/GO:0051726	BRCA2 CENPJ NAT10 ATRX MSH2 PLRG1 SGF29 DAPK3 MX2 FGFR2 IPO7
0.116842	2	42	11.2327	GO:0044786 cell cycle DNA replication	http://amigo.geneontology.org/amigo/term/GO:0044786	ATRX BRCA2
0.117708	8	745	2.53301	GO:0051129 negative regulation of cellular component organization	http://amigo.geneontology.org/amigo/term/GO:0051129	ULK2 LRRK2 PIF1 PTPRS RYK ATRX NAT10 ROBO2
0.118474	7	601	2.74743	GO:0010608 post-transcriptional regulation of gene expression	http://amigo.geneontology.org/amigo/term/GO:0010608	AGO3 ELP4 NAT10 RIPK1 DAPK3 DAPK1 FOCAD
0.118474	5	335	3.5207	GO:0016236 macroautophagy	http://amigo.geneontology.org/amigo/term/GO:0016236	ULK2 LRRK2 RIPK2 NPC1 ATG4B
0.118474	23	3403	1.5943	GO:0051173 positive regulation of nitrogen compound metabolic process	http://amigo.geneontology.org/amigo/term/GO:0051173	EYA1 SGF29 LRRK2 HDAC4 JMJD6 RIPK2 WDR48 NAT10 RIPK1 TAF8 BRCA2 DAPK1 CNTN1 ATRX MSH2 CSK AGO3 TTC5 CENPJ LRRK1 CLPX TMTC3 FGFR2
0.120394	2	43	10.9715	GO:1905314 semi-lunar valve development	http://amigo.geneontology.org/amigo/term/GO:1905314	TIE1 ROBO2
0.124145	15	1917	1.84575	GO:0044419 biological process involved in interspecies interaction between organisms	http://amigo.geneontology.org/amigo/term/GO:0044419	RIPK2 MX2 CD209 DAPK3 DAPK1 FGFR2 ZNFX1 FLNB NPC1 HMCN1 IRAK4 IPO7 MRC1 ABCC9 PI4KA
0.124461	1	4	58.9716	GO:0003137 Notch signaling pathway involved in heart induction	http://amigo.geneontology.org/amigo/term/GO:0003137	ROBO2
0.124461	1	4	58.9716	GO:0005985 sucrose metabolic process	http://amigo.geneontology.org/amigo/term/GO:0005985	FBP1
0.124461	2	46	10.2559	GO:0006298 mismatch repair	http://amigo.geneontology.org/amigo/term/GO:0006298	MSH2 MCM8
0.124461	10	1082	2.1801	GO:0006396 RNA processing	http://amigo.geneontology.org/amigo/term/GO:0006396	WDR3 SNRPA ELP4 MDN1 NAT10 PLRG1 SGF29 AGO3 RIPK1 JMJD6
0.124461	1	4	58.9716	GO:0006853 carnitine shuttle	http://amigo.geneontology.org/amigo/term/GO:0006853	CPT2
0.124461	2	44	10.7221	GO:0010092 specification of animal organ identity	http://amigo.geneontology.org/amigo/term/GO:0010092	FGFR2 ROBO2
0.124461	2	44	10.7221	GO:0010463 mesenchymal cell proliferation	http://amigo.geneontology.org/amigo/term/GO:0010463	FAT4 FGFR2
0.124461	2	47	10.0377	GO:0010677 negative regulation of cellular carbohydrate metabolic process	http://amigo.geneontology.org/amigo/term/GO:0010677	FBP1 HDAC4
0.124461	1	4	58.9716	GO:0015988 energy coupled proton transmembrane transport against electrochemical gradient	http://amigo.geneontology.org/amigo/term/GO:0015988	MT-CO1
0.124461	1	4	58.9716	GO:0015990 electron transport coupled proton transport	http://amigo.geneontology.org/amigo/term/GO:0015990	MT-CO1
0.124461	3	124	5.70693	GO:0018107 peptidyl-threonine phosphorylation	http://amigo.geneontology.org/amigo/term/GO:0018107	RIPK2 OXSR1 LRRK2
0.124461	2	46	10.2559	GO:0030517 negative regulation of axon extension	http://amigo.geneontology.org/amigo/term/GO:0030517	PTPRS RYK
0.124461	2	46	10.2559	GO:0031063 regulation of histone deacetylation	http://amigo.geneontology.org/amigo/term/GO:0031063	LRRK2 SGF29
0.124461	2	45	10.4838	GO:0031297 replication fork processing	http://amigo.geneontology.org/amigo/term/GO:0031297	ATRX BRCA2
0.124461	4	228	4.13836	GO:0031396 regulation of protein ubiquitination	http://amigo.geneontology.org/amigo/term/GO:0031396	UBXN1 LRRK2 WDR48 RIPK2
0.124461	2	47	10.0377	GO:0032365 intracellular lipid transport	http://amigo.geneontology.org/amigo/term/GO:0032365	NPC1 CPT2
0.124461	3	127	5.57212	GO:0032760 positive regulation of tumor necrosis factor production	http://amigo.geneontology.org/amigo/term/GO:0032760	RIPK1 RIPK2 LRRK2
0.124461	1	4	58.9716	GO:0032978 protein insertion into membrane from inner side	http://amigo.geneontology.org/amigo/term/GO:0032978	OXA1L
0.124461	1	4	58.9716	GO:0032979 protein insertion into mitochondrial inner membrane from matrix	http://amigo.geneontology.org/amigo/term/GO:0032979	OXA1L
0.124461	1	4	58.9716	GO:0033600 negative regulation of mammary gland epithelial cell proliferation	http://amigo.geneontology.org/amigo/term/GO:0033600	BRCA2
0.124461	6	483	2.93027	GO:0034470 ncRNA processing	http://amigo.geneontology.org/amigo/term/GO:0034470	WDR3 ELP4 MDN1 NAT10 AGO3 RIPK1
0.124461	1	4	58.9716	GO:0035480 regulation of Notch signaling pathway involved in heart induction	http://amigo.geneontology.org/amigo/term/GO:0035480	ROBO2
0.124461	1	4	58.9716	GO:0035481 positive regulation of Notch signaling pathway involved in heart induction	http://amigo.geneontology.org/amigo/term/GO:0035481	ROBO2
0.124461	1	4	58.9716	GO:0035846 oviduct epithelium development	http://amigo.geneontology.org/amigo/term/GO:0035846	CSMD1
0.124461	1	4	58.9716	GO:0038116 chemokine (C-C motif) ligand 21 signaling pathway	http://amigo.geneontology.org/amigo/term/GO:0038116	OXSR1
0.124461	2	47	10.0377	GO:0042551 neuron maturation	http://amigo.geneontology.org/amigo/term/GO:0042551	FARP2 LRRK2
0.124461	2	47	10.0377	GO:0045747 positive regulation of Notch signaling pathway	http://amigo.geneontology.org/amigo/term/GO:0045747	CNTN6 ROBO2
0.124461	1	4	58.9716	GO:0046351 disaccharide biosynthetic process	http://amigo.geneontology.org/amigo/term/GO:0046351	FBP1
0.124461	3	126	5.61635	GO:0046660 female sex differentiation	http://amigo.geneontology.org/amigo/term/GO:0046660	BRCA2 CSMD1 ROBO2
0.124461	1	4	58.9716	GO:0048014 Tie signaling pathway	http://amigo.geneontology.org/amigo/term/GO:0048014	SVEP1
0.124461	1	4	58.9716	GO:0048298 positive regulation of isotype switching to IgA isotypes	http://amigo.geneontology.org/amigo/term/GO:0048298	MSH2
0.124461	4	229	4.12029	GO:0048588 developmental cell growth	http://amigo.geneontology.org/amigo/term/GO:0048588	ULK2 DSCAM PTPRS RYK
0.124461	1	4	58.9716	GO:0050893 sensory processing	http://amigo.geneontology.org/amigo/term/GO:0050893	TTC8
0.124461	1	4	58.9716	GO:0050923 regulation of negative chemotaxis	http://amigo.geneontology.org/amigo/term/GO:0050923	ROBO2
0.124461	1	4	58.9716	GO:0060737 prostate gland morphogenetic growth	http://amigo.geneontology.org/amigo/term/GO:0060737	FGFR2
0.124461	1	4	58.9716	GO:0070105 positive regulation of interleukin-6-mediated signaling pathway	http://amigo.geneontology.org/amigo/term/GO:0070105	RIPK1
0.124461	1	4	58.9716	GO:0071865 regulation of apoptotic process in bone marrow cell	http://amigo.geneontology.org/amigo/term/GO:0071865	FGFR2
0.124461	1	4	58.9716	GO:0071866 negative regulation of apoptotic process in bone marrow cell	http://amigo.geneontology.org/amigo/term/GO:0071866	FGFR2
0.124461	1	4	58.9716	GO:0072137 condensed mesenchymal cell proliferation	http://amigo.geneontology.org/amigo/term/GO:0072137	FAT4
0.124461	1	4	58.9716	GO:0072513 positive regulation of secondary heart field cardioblast proliferation	http://amigo.geneontology.org/amigo/term/GO:0072513	EYA1
0.124461	1	4	58.9716	GO:0090086 negative regulation of protein deubiquitination	http://amigo.geneontology.org/amigo/term/GO:0090086	UBXN1
0.124461	10	1078	2.18819	GO:1902533 positive regulation of intracellular signal transduction	http://amigo.geneontology.org/amigo/term/GO:1902533	RIPK2 NET1 IRAK4 LRRK2 RIPK1 RYK CSK AGO3 LRRK1 FGFR2
0.124461	1	4	58.9716	GO:1903760 regulation of voltage-gated potassium channel activity involved in ventricular cardiac muscle cell action potential repolarization	http://amigo.geneontology.org/amigo/term/GO:1903760	ABCC9
0.124461	1	4	58.9716	GO:1904092 regulation of autophagic cell death	http://amigo.geneontology.org/amigo/term/GO:1904092	DAPK1
0.124461	3	123	5.75333	GO:1905037 autophagosome organization	http://amigo.geneontology.org/amigo/term/GO:1905037	ULK2 LRRK2 ATG4B
0.124461	1	4	58.9716	GO:1905289 regulation of CAMKK-AMPK signaling cascade	http://amigo.geneontology.org/amigo/term/GO:1905289	LRRK2
0.124461	1	4	58.9716	GO:1990708 conditioned place preference	http://amigo.geneontology.org/amigo/term/GO:1990708	CSMD1
0.124461	1	4	58.9716	GO:2000468 regulation of peroxidase activity	http://amigo.geneontology.org/amigo/term/GO:2000468	LRRK2
0.124595	10	1089	2.16608	GO:0032101 regulation of response to external stimulus	http://amigo.geneontology.org/amigo/term/GO:0032101	GGT1 DSCAM ROBO2 RIPK2 PTPRS ZNFX1 RIPK1 RYK OXSR1 LRRK2
0.125161	3	128	5.52859	GO:0006476 protein deacetylation	http://amigo.geneontology.org/amigo/term/GO:0006476	HDAC4 LRRK2 SGF29
0.125161	22	3269	1.58749	GO:0010033 response to organic substance	http://amigo.geneontology.org/amigo/term/GO:0010033	LRRK2 IRAK4 RIPK1 FGFR2 RIPK2 DAPK3 MX2 DAPK1 TIE1 HDAC4 ATRX CSK TRPA1 FLNB NPC1 FBP1 OXSR1 FAT4 MRC1 ROBO2 ABCC9 UBXN1
0.127211	2	48	9.82861	GO:0006110 regulation of glycolytic process	http://amigo.geneontology.org/amigo/term/GO:0006110	FBP1 HDAC4
0.127211	2	48	9.82861	GO:0010824 regulation of centrosome duplication	http://amigo.geneontology.org/amigo/term/GO:0010824	NAT10 CENPJ
0.127211	4	234	4.03225	GO:0048705 skeletal system morphogenesis	http://amigo.geneontology.org/amigo/term/GO:0048705	EYA1 WDR48 RYK FGFR2
0.127211	2	48	9.82861	GO:0060443 mammary gland morphogenesis	http://amigo.geneontology.org/amigo/term/GO:0060443	CSMD1 FGFR2
0.127215	9	935	2.27057	GO:0071345 cellular response to cytokine stimulus	http://amigo.geneontology.org/amigo/term/GO:0071345	IRAK4 RIPK1 DAPK3 DAPK1 HDAC4 RIPK2 FLNB OXSR1 MRC1
0.127736	5	356	3.31301	GO:0060562 epithelial tube morphogenesis	http://amigo.geneontology.org/amigo/term/GO:0060562	TIE1 EYA1 CSMD1 FAT4 FGFR2
0.128801	5	357	3.30373	GO:0031346 positive regulation of cell projection organization	http://amigo.geneontology.org/amigo/term/GO:0031346	DSCAM ROBO2 CNTN1 HDAC4 CENPJ
0.130274	10	1102	2.14053	GO:0045087 innate immune response	http://amigo.geneontology.org/amigo/term/GO:0045087	RIPK2 DAPK3 DAPK1 CD209 ZNFX1 FLNB MX2 IRAK4 IPO7 MRC1
0.130274	2	49	9.62802	GO:1900087 positive regulation of G1/S transition of mitotic cell cycle	http://amigo.geneontology.org/amigo/term/GO:1900087	CENPJ PLRG1
0.130274	3	131	5.40198	GO:1903557 positive regulation of tumor necrosis factor superfamily cytokine production	http://amigo.geneontology.org/amigo/term/GO:1903557	RIPK1 RIPK2 LRRK2
0.133657	10	1108	2.12894	GO:0002520 immune system development	http://amigo.geneontology.org/amigo/term/GO:0002520	MSH2 FARP2 JMJD6 RIPK2 PTPRQ BRCA2 LRRK1 RIPK1 FGFR2 HDAC4
0.133657	3	133	5.32075	GO:0018210 peptidyl-threonine modification	http://amigo.geneontology.org/amigo/term/GO:0018210	RIPK2 OXSR1 LRRK2
0.133657	2	50	9.43546	GO:0050919 negative chemotaxis	http://amigo.geneontology.org/amigo/term/GO:0050919	ROBO2 RYK
0.133657	2	50	9.43546	GO:1901099 negative regulation of signal transduction in absence of ligand	http://amigo.geneontology.org/amigo/term/GO:1901099	EYA1 RIPK1
0.133657	2	50	9.43546	GO:2001240 negative regulation of extrinsic apoptotic signaling pathway in absence of ligand	http://amigo.geneontology.org/amigo/term/GO:2001240	EYA1 RIPK1
0.133958	5	363	3.24913	GO:0009895 negative regulation of catabolic process	http://amigo.geneontology.org/amigo/term/GO:0009895	LRRK2 UBXN1 FBP1 HDAC4 NPC1
0.133958	10	1110	2.1251	GO:0010629 negative regulation of gene expression	http://amigo.geneontology.org/amigo/term/GO:0010629	ZNFX1 AGO3 LRRK2 RIPK1 DAPK3 DAPK1 CSK FOCAD PTPRS TTC5
0.134273	4	241	3.91513	GO:0015931 nucleobase-containing compound transport	http://amigo.geneontology.org/amigo/term/GO:0015931	XPOT MVP MX2 RIPK1
0.134273	3	134	5.28104	GO:0045931 positive regulation of mitotic cell cycle	http://amigo.geneontology.org/amigo/term/GO:0045931	CENPJ BRCA2 PLRG1
0.134273	4	241	3.91513	GO:0050920 regulation of chemotaxis	http://amigo.geneontology.org/amigo/term/GO:0050920	DSCAM ROBO2 RYK OXSR1
0.135474	3	138	5.12797	GO:0002224 toll-like receptor signaling pathway	http://amigo.geneontology.org/amigo/term/GO:0002224	RIPK2 PTPRS IRAK4
0.135474	7	653	2.52865	GO:0002521 leukocyte differentiation	http://amigo.geneontology.org/amigo/term/GO:0002521	FARP2 JMJD6 MSH2 RIPK2 LRRK1 RIPK1 HDAC4
0.135474	1	5	47.1773	GO:0006248 CMP catabolic process	http://amigo.geneontology.org/amigo/term/GO:0006248	DPYS
0.135474	1	5	47.1773	GO:0007231 osmosensory signaling pathway	http://amigo.geneontology.org/amigo/term/GO:0007231	OXSR1
0.135474	1	5	47.1773	GO:0016199 axon midline choice point recognition	http://amigo.geneontology.org/amigo/term/GO:0016199	ROBO2
0.135474	1	5	47.1773	GO:0021869 forebrain ventricular zone progenitor cell division	http://amigo.geneontology.org/amigo/term/GO:0021869	FGFR2
0.135474	1	5	47.1773	GO:0021873 forebrain neuroblast division	http://amigo.geneontology.org/amigo/term/GO:0021873	FGFR2
0.135474	13	1641	1.86869	GO:0031399 regulation of protein modification process	http://amigo.geneontology.org/amigo/term/GO:0031399	LRRK2 MVP HDAC4 RIPK2 UBXN1 CNTN1 CSK WDR48 LRRK1 ATRX RIPK1 SGF29 IPO7
0.135474	7	645	2.56001	GO:0034660 ncRNA metabolic process	http://amigo.geneontology.org/amigo/term/GO:0034660	WDR3 ELP4 MDN1 NAT10 AGO3 RIPK1 ATRX
0.135474	10	1123	2.1005	GO:0035295 tube development	http://amigo.geneontology.org/amigo/term/GO:0035295	TIE1 JMJD6 ATRX EYA1 WDR48 TTC8 CSMD1 FAT4 ROBO2 FGFR2
0.135474	1	5	47.1773	GO:0035513 oxidative RNA demethylation	http://amigo.geneontology.org/amigo/term/GO:0035513	JMJD6
0.135474	3	135	5.24192	GO:0042471 ear morphogenesis	http://amigo.geneontology.org/amigo/term/GO:0042471	EYA1 PTPRQ FGFR2
0.135474	1	5	47.1773	GO:0045875 negative regulation of sister chromatid cohesion	http://amigo.geneontology.org/amigo/term/GO:0045875	ATRX
0.135474	2	52	9.07256	GO:0045912 negative regulation of carbohydrate metabolic process	http://amigo.geneontology.org/amigo/term/GO:0045912	FBP1 HDAC4
0.135474	1	5	47.1773	GO:0046050 UMP catabolic process	http://amigo.geneontology.org/amigo/term/GO:0046050	DPYS
0.135474	1	5	47.1773	GO:0046113 nucleobase catabolic process	http://amigo.geneontology.org/amigo/term/GO:0046113	DPYS
0.135474	1	5	47.1773	GO:0048296 regulation of isotype switching to IgA isotypes	http://amigo.geneontology.org/amigo/term/GO:0048296	MSH2
0.135474	1	5	47.1773	GO:0048496 maintenance of animal organ identity	http://amigo.geneontology.org/amigo/term/GO:0048496	USH2A
0.135474	3	135	5.24192	GO:0048593 camera-type eye morphogenesis	http://amigo.geneontology.org/amigo/term/GO:0048593	SDK2 TTC8 DSCAM
0.135474	1	5	47.1773	GO:0051418 microtubule nucleation by microtubule organizing center	http://amigo.geneontology.org/amigo/term/GO:0051418	CENPJ
0.135474	21	3120	1.5877	GO:0051641 cellular localization	http://amigo.geneontology.org/amigo/term/GO:0051641	OXA1L XPOT LRRK2 IPO7 CSK TAF8 BRCA2 NPC1 USH2A ATRX TRPA1 TTC8 PLRG1 MSH2 MTCH2 KPTN MCM8 ATG4B MX2 CPT2 SGF29
0.135474	1	5	47.1773	GO:0060161 positive regulation of dopamine receptor signaling pathway	http://amigo.geneontology.org/amigo/term/GO:0060161	LRRK2
0.135474	1	5	47.1773	GO:0060501 positive regulation of epithelial cell proliferation involved in lung morphogenesis	http://amigo.geneontology.org/amigo/term/GO:0060501	FGFR2
0.135474	1	5	47.1773	GO:0060545 positive regulation of necroptotic process	http://amigo.geneontology.org/amigo/term/GO:0060545	RIPK1
0.135474	1	5	47.1773	GO:0060664 epithelial cell proliferation involved in salivary gland morphogenesis	http://amigo.geneontology.org/amigo/term/GO:0060664	FGFR2
0.135474	1	5	47.1773	GO:0071242 cellular response to ammonium ion	http://amigo.geneontology.org/amigo/term/GO:0071242	GRIA1
0.135474	1	5	47.1773	GO:0071839 apoptotic process in bone marrow cell	http://amigo.geneontology.org/amigo/term/GO:0071839	FGFR2
0.135474	1	5	47.1773	GO:1902809 regulation of skeletal muscle fiber differentiation	http://amigo.geneontology.org/amigo/term/GO:1902809	HDAC4
0.135474	1	5	47.1773	GO:1903724 positive regulation of centriole elongation	http://amigo.geneontology.org/amigo/term/GO:1903724	CENPJ
0.135474	1	5	47.1773	GO:2000152 regulation of ubiquitin-specific protease activity	http://amigo.geneontology.org/amigo/term/GO:2000152	UBXN1
0.135474	1	5	47.1773	GO:2000172 regulation of branching morphogenesis of a nerve	http://amigo.geneontology.org/amigo/term/GO:2000172	LRRK2
0.135637	3	139	5.09108	GO:0007098 centrosome cycle	http://amigo.geneontology.org/amigo/term/GO:0007098	CENPJ NAT10 BRCA2
0.135637	3	139	5.09108	GO:0035601 protein deacylation	http://amigo.geneontology.org/amigo/term/GO:0035601	HDAC4 LRRK2 SGF29
0.135637	2	53	8.90138	GO:0050982 detection of mechanical stimulus	http://amigo.geneontology.org/amigo/term/GO:0050982	TRPA1 PTPRQ
0.135637	2	53	8.90138	GO:0060147 regulation of post-transcriptional gene silencing	http://amigo.geneontology.org/amigo/term/GO:0060147	RIPK1 FOCAD
0.135637	7	655	2.52093	GO:0097190 apoptotic signaling pathway	http://amigo.geneontology.org/amigo/term/GO:0097190	EYA1 RIPK1 MSH2 BRCA2 DAPK3 DAPK1 LRRK2
0.135637	2	53	8.90138	GO:1903573 negative regulation of response to endoplasmic reticulum stress	http://amigo.geneontology.org/amigo/term/GO:1903573	UBXN1 LRRK2
0.139048	7	659	2.50562	GO:0007610 behavior	http://amigo.geneontology.org/amigo/term/GO:0007610	CNTN1 HDAC4 NPC1 GRIA1 DSCAM CSMD1 LRRK2
0.139048	14	1830	1.8046	GO:0010647 positive regulation of cell communication	http://amigo.geneontology.org/amigo/term/GO:0010647	RIPK2 LRRK1 NET1 IRAK4 LRRK2 RIPK1 CENPJ RYK CSK AGO3 CNTN6 FGFR2 DAPK3 ROBO2
0.139064	3	141	5.01886	GO:0007498 mesoderm development	http://amigo.geneontology.org/amigo/term/GO:0007498	FGFR2 EYA1 TIE1
0.139064	3	141	5.01886	GO:0070585 protein localization to mitochondrion	http://amigo.geneontology.org/amigo/term/GO:0070585	OXA1L LRRK2 MTCH2
0.139064	3	141	5.01886	GO:1903322 positive regulation of protein modification by small protein conjugation or removal	http://amigo.geneontology.org/amigo/term/GO:1903322	HDAC4 LRRK2 RIPK2
0.140439	5	378	3.12019	GO:0045787 positive regulation of cell cycle	http://amigo.geneontology.org/amigo/term/GO:0045787	CENPJ ATRX BRCA2 PLRG1 FGFR2
0.140931	14	1836	1.7987	GO:0023056 positive regulation of signaling	http://amigo.geneontology.org/amigo/term/GO:0023056	RIPK2 LRRK1 NET1 IRAK4 LRRK2 RIPK1 CENPJ RYK CSK AGO3 CNTN6 FGFR2 DAPK3 ROBO2
0.141452	2	57	8.27672	GO:0003179 heart valve morphogenesis	http://amigo.geneontology.org/amigo/term/GO:0003179	TIE1 ROBO2
0.141452	1	6	39.3144	GO:0006249 dCMP catabolic process	http://amigo.geneontology.org/amigo/term/GO:0006249	DPYS
0.141452	5	384	3.07144	GO:0008544 epidermis development	http://amigo.geneontology.org/amigo/term/GO:0008544	SVEP1 USH2A FLNB PTPRQ FGFR2
0.141452	1	6	39.3144	GO:0009175 pyrimidine ribonucleoside monophosphate catabolic process	http://amigo.geneontology.org/amigo/term/GO:0009175	DPYS
0.141452	3	146	4.84698	GO:0009581 detection of external stimulus	http://amigo.geneontology.org/amigo/term/GO:0009581	TRPA1 PTPRQ EYS
0.141452	1	6	39.3144	GO:0010571 positive regulation of nuclear cell cycle DNA replication	http://amigo.geneontology.org/amigo/term/GO:0010571	ATRX
0.141452	6	522	2.71134	GO:0016049 cell growth	http://amigo.geneontology.org/amigo/term/GO:0016049	ULK2 FBP1 DSCAM PTPRS RYK NET1
0.141452	1	6	39.3144	GO:0021891 olfactory bulb interneuron development	http://amigo.geneontology.org/amigo/term/GO:0021891	ROBO2
0.141452	1	6	39.3144	GO:0031033 myosin filament organization	http://amigo.geneontology.org/amigo/term/GO:0031033	DAPK3
0.141452	2	58	8.13402	GO:0032210 regulation of telomere maintenance via telomerase	http://amigo.geneontology.org/amigo/term/GO:0032210	PIF1 NAT10
0.141452	1	6	39.3144	GO:0033091 positive regulation of immature T cell proliferation	http://amigo.geneontology.org/amigo/term/GO:0033091	RIPK2
0.141452	1	6	39.3144	GO:0033092 positive regulation of immature T cell proliferation in thymus	http://amigo.geneontology.org/amigo/term/GO:0033092	RIPK2
0.141452	3	148	4.78149	GO:0035107 appendage morphogenesis	http://amigo.geneontology.org/amigo/term/GO:0035107	ATRX FRAS1 FGFR2
0.141452	3	148	4.78149	GO:0035108 limb morphogenesis	http://amigo.geneontology.org/amigo/term/GO:0035108	ATRX FRAS1 FGFR2
0.141452	1	6	39.3144	GO:0035564 regulation of kidney size	http://amigo.geneontology.org/amigo/term/GO:0035564	LRRK2
0.141452	2	58	8.13402	GO:0035904 aorta development	http://amigo.geneontology.org/amigo/term/GO:0035904	EYA1 ROBO2
0.141452	1	6	39.3144	GO:0038146 chemokine (C-X-C motif) ligand 12 signaling pathway	http://amigo.geneontology.org/amigo/term/GO:0038146	OXSR1
0.141452	2	56	8.42452	GO:0042771 intrinsic apoptotic signaling pathway in response to DNA damage by p53 class mediator	http://amigo.geneontology.org/amigo/term/GO:0042771	MSH2 BRCA2
0.141452	6	528	2.68053	GO:0043410 positive regulation of MAPK cascade	http://amigo.geneontology.org/amigo/term/GO:0043410	LRRK2 RIPK1 RYK CSK RIPK2 FGFR2
0.141452	2	57	8.27672	GO:0043470 regulation of carbohydrate catabolic process	http://amigo.geneontology.org/amigo/term/GO:0043470	FBP1 HDAC4
0.141452	1	6	39.3144	GO:0043570 maintenance of DNA repeat elements	http://amigo.geneontology.org/amigo/term/GO:0043570	MSH2
0.141452	1	6	39.3144	GO:0045627 positive regulation of T-helper 1 cell differentiation	http://amigo.geneontology.org/amigo/term/GO:0045627	RIPK2
0.141452	4	257	3.67139	GO:0045926 negative regulation of growth	http://amigo.geneontology.org/amigo/term/GO:0045926	ULK2 FBP1 PTPRS RYK
0.141452	1	6	39.3144	GO:0046063 dCMP metabolic process	http://amigo.geneontology.org/amigo/term/GO:0046063	DPYS
0.141452	1	6	39.3144	GO:0046079 dUMP catabolic process	http://amigo.geneontology.org/amigo/term/GO:0046079	DPYS
0.141452	2	55	8.57769	GO:0046605 regulation of centrosome cycle	http://amigo.geneontology.org/amigo/term/GO:0046605	NAT10 CENPJ
0.141452	1	6	39.3144	GO:0048290 isotype switching to IgA isotypes	http://amigo.geneontology.org/amigo/term/GO:0048290	MSH2
0.141452	1	6	39.3144	GO:0048752 semicircular canal morphogenesis	http://amigo.geneontology.org/amigo/term/GO:0048752	EYA1
0.141452	5	385	3.06346	GO:0050678 regulation of epithelial cell proliferation	http://amigo.geneontology.org/amigo/term/GO:0050678	BRCA2 TIE1 FGFR2 EYA1 WDR48
0.141452	2	57	8.27672	GO:0050732 negative regulation of peptidyl-tyrosine phosphorylation	http://amigo.geneontology.org/amigo/term/GO:0050732	MVP LRRK1
0.141452	5	386	3.05553	GO:0050767 regulation of neurogenesis	http://amigo.geneontology.org/amigo/term/GO:0050767	ULK2 DSCAM ROBO2 PTPRS RYK
0.141452	1	6	39.3144	GO:0051031 tRNA transport	http://amigo.geneontology.org/amigo/term/GO:0051031	XPOT
0.141452	4	255	3.70018	GO:0051403 stress-activated MAPK cascade	http://amigo.geneontology.org/amigo/term/GO:0051403	RIPK1 LRRK2 RIPK2 IRAK4
0.141452	1	6	39.3144	GO:0060066 oviduct development	http://amigo.geneontology.org/amigo/term/GO:0060066	CSMD1
0.141452	1	6	39.3144	GO:0060359 response to ammonium ion	http://amigo.geneontology.org/amigo/term/GO:0060359	GRIA1
0.141452	1	6	39.3144	GO:0060526 prostate glandular acinus morphogenesis	http://amigo.geneontology.org/amigo/term/GO:0060526	FGFR2
0.141452	1	6	39.3144	GO:0060527 prostate epithelial cord arborization involved in prostate glandular acinus morphogenesis	http://amigo.geneontology.org/amigo/term/GO:0060527	FGFR2
0.141452	1	6	39.3144	GO:0060916 mesenchymal cell proliferation involved in lung development	http://amigo.geneontology.org/amigo/term/GO:0060916	FGFR2
0.141452	1	6	39.3144	GO:0061643 chemorepulsion of axon	http://amigo.geneontology.org/amigo/term/GO:0061643	RYK
0.141452	1	6	39.3144	GO:0062100 positive regulation of programmed necrotic cell death	http://amigo.geneontology.org/amigo/term/GO:0062100	RIPK1
0.141452	1	6	39.3144	GO:0070103 regulation of interleukin-6-mediated signaling pathway	http://amigo.geneontology.org/amigo/term/GO:0070103	RIPK1
0.141452	1	6	39.3144	GO:0070427 nucleotide-binding oligomerization domain containing 1 signaling pathway	http://amigo.geneontology.org/amigo/term/GO:0070427	RIPK2
0.141452	4	261	3.61512	GO:0071695 anatomical structure maturation	http://amigo.geneontology.org/amigo/term/GO:0071695	FARP2 BRCA2 FAT4 LRRK2
0.141452	1	6	39.3144	GO:0071864 positive regulation of cell proliferation in bone marrow	http://amigo.geneontology.org/amigo/term/GO:0071864	FGFR2
0.141452	2	58	8.13402	GO:0090329 regulation of DNA-templated DNA replication	http://amigo.geneontology.org/amigo/term/GO:0090329	ATRX BRCA2
0.141452	1	6	39.3144	GO:1900244 positive regulation of synaptic vesicle endocytosis	http://amigo.geneontology.org/amigo/term/GO:1900244	LRRK2
0.141452	1	6	39.3144	GO:1901727 positive regulation of histone deacetylase activity	http://amigo.geneontology.org/amigo/term/GO:1901727	LRRK2
0.141452	1	6	39.3144	GO:1902498 regulation of protein autoubiquitination	http://amigo.geneontology.org/amigo/term/GO:1902498	LRRK2
0.141452	1	6	39.3144	GO:1902525 regulation of protein monoubiquitination	http://amigo.geneontology.org/amigo/term/GO:1902525	WDR48
0.141452	1	6	39.3144	GO:1903215 negative regulation of protein targeting to mitochondrion	http://amigo.geneontology.org/amigo/term/GO:1903215	LRRK2
0.141452	1	6	39.3144	GO:1904293 negative regulation of ERAD pathway	http://amigo.geneontology.org/amigo/term/GO:1904293	UBXN1
0.142107	4	262	3.60132	GO:0031098 stress-activated protein kinase signaling cascade	http://amigo.geneontology.org/amigo/term/GO:0031098	RIPK1 LRRK2 RIPK2 IRAK4
0.142107	4	262	3.60132	GO:0060828 regulation of canonical Wnt signaling pathway	http://amigo.geneontology.org/amigo/term/GO:0060828	LRRK1 LRRK2 DAPK3 FGFR2
0.142147	3	149	4.74939	GO:0009582 detection of abiotic stimulus	http://amigo.geneontology.org/amigo/term/GO:0009582	TRPA1 PTPRQ EYS
0.142147	7	680	2.42824	GO:0043009 chordate embryonic development	http://amigo.geneontology.org/amigo/term/GO:0043009	TIE1 MSH2 EYA1 TAF8 BRCA2 CPT2 FGFR2
0.142147	8	835	2.25999	GO:0043086 negative regulation of catalytic activity	http://amigo.geneontology.org/amigo/term/GO:0043086	MVP PIF1 UBXN1 LRRK2 CSK TTC8 OXA1L IPO7
0.142718	4	263	3.58763	GO:0003007 heart morphogenesis	http://amigo.geneontology.org/amigo/term/GO:0003007	EYA1 FAT4 FGFR2 ROBO2
0.144012	3	150	4.71773	GO:0030879 mammary gland development	http://amigo.geneontology.org/amigo/term/GO:0030879	BRCA2 CSMD1 FGFR2
0.146204	3	151	4.68649	GO:0007224 smoothened signaling pathway	http://amigo.geneontology.org/amigo/term/GO:0007224	BOC CENPJ FGFR2
0.14641	21	3210	1.54318	GO:0009966 regulation of signal transduction	http://amigo.geneontology.org/amigo/term/GO:0009966	CSK RIPK2 EYA1 KPTN LRRK1 NET1 LRRK2 IRAK4 BRCA2 MVP RIPK1 CENPJ RYK FBP1 AGO3 CNTN6 DAPK1 FGFR2 PTPRS DAPK3 ROBO2
0.14682	4	266	3.54717	GO:0016485 protein processing	http://amigo.geneontology.org/amigo/term/GO:0016485	TLL1 LRRK2 GGT1 RIPK2
0.147138	2	60	7.86289	GO:0060688 regulation of morphogenesis of a branching structure	http://amigo.geneontology.org/amigo/term/GO:0060688	LRRK2 FGFR2
0.147138	2	60	7.86289	GO:2001239 regulation of extrinsic apoptotic signaling pathway in absence of ligand	http://amigo.geneontology.org/amigo/term/GO:2001239	EYA1 RIPK1
0.147263	3	152	4.65566	GO:0031023 microtubule organizing center organization	http://amigo.geneontology.org/amigo/term/GO:0031023	CENPJ NAT10 BRCA2
0.148252	1	7	33.6981	GO:0001554 luteolysis	http://amigo.geneontology.org/amigo/term/GO:0001554	ROBO2
0.148252	1	7	33.6981	GO:0006627 protein processing involved in protein targeting to mitochondrion	http://amigo.geneontology.org/amigo/term/GO:0006627	LRRK2
0.148252	1	7	33.6981	GO:0016198 axon choice point recognition	http://amigo.geneontology.org/amigo/term/GO:0016198	ROBO2
0.148252	1	7	33.6981	GO:0022028 tangential migration from the subventricular zone to the olfactory bulb	http://amigo.geneontology.org/amigo/term/GO:0022028	LRRK2
0.148252	8	857	2.20198	GO:0030029 actin filament-based process	http://amigo.geneontology.org/amigo/term/GO:0030029	DAPK3 FARP2 ABCC9 KPTN FLNB TTC8 HMCN1 FGD6
0.148252	2	61	7.73399	GO:0030490 maturation of SSU-rRNA	http://amigo.geneontology.org/amigo/term/GO:0030490	WDR3 NAT10
0.148252	1	7	33.6981	GO:0032289 central nervous system myelin formation	http://amigo.geneontology.org/amigo/term/GO:0032289	CNTN1
0.148252	4	273	3.45621	GO:0032412 regulation of ion transmembrane transporter activity	http://amigo.geneontology.org/amigo/term/GO:0032412	ABCC9 OXSR1 DAPK1 RIPK1
0.148252	1	7	33.6981	GO:0032808 lacrimal gland development	http://amigo.geneontology.org/amigo/term/GO:0032808	FGFR2
0.148252	1	7	33.6981	GO:0034164 negative regulation of toll-like receptor 9 signaling pathway	http://amigo.geneontology.org/amigo/term/GO:0034164	PTPRS
0.148252	1	7	33.6981	GO:0034727 piecemeal microautophagy of the nucleus	http://amigo.geneontology.org/amigo/term/GO:0034727	ULK2
0.148252	2	61	7.73399	GO:0035196 production of miRNAs involved in gene silencing by miRNA	http://amigo.geneontology.org/amigo/term/GO:0035196	AGO3 RIPK1
0.148252	3	153	4.62523	GO:0035264 multicellular organism growth	http://amigo.geneontology.org/amigo/term/GO:0035264	ATRX WDR48 TTC8
0.148252	2	62	7.60925	GO:0035315 hair cell differentiation	http://amigo.geneontology.org/amigo/term/GO:0035315	USH2A PTPRQ
0.148252	1	7	33.6981	GO:0042473 outer ear morphogenesis	http://amigo.geneontology.org/amigo/term/GO:0042473	EYA1
0.148252	1	7	33.6981	GO:0042997 negative regulation of Golgi to plasma membrane protein transport	http://amigo.geneontology.org/amigo/term/GO:0042997	CSK
0.148252	1	7	33.6981	GO:0043654 recognition of apoptotic cell	http://amigo.geneontology.org/amigo/term/GO:0043654	JMJD6
0.148252	1	7	33.6981	GO:0046035 CMP metabolic process	http://amigo.geneontology.org/amigo/term/GO:0046035	DPYS
0.148252	3	156	4.53628	GO:0048660 regulation of smooth muscle cell proliferation	http://amigo.geneontology.org/amigo/term/GO:0048660	FGFR2 HDAC4 IRAK4
0.148252	1	7	33.6981	GO:0048842 positive regulation of axon extension involved in axon guidance	http://amigo.geneontology.org/amigo/term/GO:0048842	DSCAM
0.148252	3	153	4.62523	GO:0050768 negative regulation of neurogenesis	http://amigo.geneontology.org/amigo/term/GO:0050768	ULK2 PTPRS RYK
0.148252	1	7	33.6981	GO:0050955 thermoception	http://amigo.geneontology.org/amigo/term/GO:0050955	TRPA1
0.148252	1	7	33.6981	GO:0051964 negative regulation of synapse assembly	http://amigo.geneontology.org/amigo/term/GO:0051964	ROBO2
0.148252	1	7	33.6981	GO:0060449 bud elongation involved in lung branching	http://amigo.geneontology.org/amigo/term/GO:0060449	FGFR2
0.148252	1	7	33.6981	GO:0060462 lung lobe development	http://amigo.geneontology.org/amigo/term/GO:0060462	FGFR2
0.148252	1	7	33.6981	GO:0060463 lung lobe morphogenesis	http://amigo.geneontology.org/amigo/term/GO:0060463	FGFR2
0.148252	1	7	33.6981	GO:0060592 mammary gland formation	http://amigo.geneontology.org/amigo/term/GO:0060592	FGFR2
0.148252	1	7	33.6981	GO:0060745 mammary gland branching involved in pregnancy	http://amigo.geneontology.org/amigo/term/GO:0060745	CSMD1
0.148252	3	157	4.50739	GO:0061351 neural precursor cell proliferation	http://amigo.geneontology.org/amigo/term/GO:0061351	RYK LRRK2 FGFR2
0.148252	1	7	33.6981	GO:0070671 response to interleukin-12	http://amigo.geneontology.org/amigo/term/GO:0070671	RIPK2
0.148252	1	7	33.6981	GO:0071224 cellular response to peptidoglycan	http://amigo.geneontology.org/amigo/term/GO:0071224	RIPK2
0.148252	1	7	33.6981	GO:0071286 cellular response to magnesium ion	http://amigo.geneontology.org/amigo/term/GO:0071286	FBP1
0.148252	1	7	33.6981	GO:0071863 regulation of cell proliferation in bone marrow	http://amigo.geneontology.org/amigo/term/GO:0071863	FGFR2
0.148252	1	7	33.6981	GO:0072257 metanephric nephron tubule epithelial cell differentiation	http://amigo.geneontology.org/amigo/term/GO:0072257	FAT4
0.148252	1	7	33.6981	GO:0072307 regulation of metanephric nephron tubule epithelial cell differentiation	http://amigo.geneontology.org/amigo/term/GO:0072307	FAT4
0.148252	11	1355	1.91495	GO:0098542 defense response to other organism	http://amigo.geneontology.org/amigo/term/GO:0098542	RIPK2 MX2 DAPK3 DAPK1 CD209 ZNFX1 FLNB IRAK4 IPO7 MRC1 ABCC9
0.148252	1	7	33.6981	GO:1901033 positive regulation of response to reactive oxygen species	http://amigo.geneontology.org/amigo/term/GO:1901033	RIPK1
0.148252	1	7	33.6981	GO:1902803 regulation of synaptic vesicle transport	http://amigo.geneontology.org/amigo/term/GO:1902803	LRRK2
0.148252	1	7	33.6981	GO:1903722 regulation of centriole elongation	http://amigo.geneontology.org/amigo/term/GO:1903722	CENPJ
0.148252	1	7	33.6981	GO:1905206 positive regulation of hydrogen peroxide-induced cell death	http://amigo.geneontology.org/amigo/term/GO:1905206	RIPK1
0.148252	1	7	33.6981	GO:1905279 regulation of retrograde transport endosome to Golgi	http://amigo.geneontology.org/amigo/term/GO:1905279	LRRK2
0.148252	1	7	33.6981	GO:2000794 regulation of epithelial cell proliferation involved in lung morphogenesis	http://amigo.geneontology.org/amigo/term/GO:2000794	FGFR2
0.148379	2	63	7.48846	GO:0001658 branching involved in ureteric bud morphogenesis	http://amigo.geneontology.org/amigo/term/GO:0001658	EYA1 FAT4
0.149532	7	702	2.35215	GO:0009792 embryo development ending in birth or egg hatching	http://amigo.geneontology.org/amigo/term/GO:0009792	TIE1 MSH2 EYA1 TAF8 BRCA2 CPT2 FGFR2
0.149532	7	702	2.35215	GO:0040008 regulation of growth	http://amigo.geneontology.org/amigo/term/GO:0040008	ULK2 FBP1 DSCAM PTPRS RYK FGFR2 NET1
0.149884	10	1194	1.9756	GO:0009628 response to abiotic stimulus	http://amigo.geneontology.org/amigo/term/GO:0009628	EYA1 NET1 HDAC4 MSH2 TRPA1 PTPRQ BRCA2 OXSR1 MT-CO1 EYS
0.149884	9	1025	2.0712	GO:0044087 regulation of cellular component biogenesis	http://amigo.geneontology.org/amigo/term/GO:0044087	LRRK2 CENPJ DAPK3 FARP2 TIE1 HDAC4 PTPRS TTC8 ROBO2
0.15007	6	552	2.56398	GO:0032103 positive regulation of response to external stimulus	http://amigo.geneontology.org/amigo/term/GO:0032103	DSCAM RIPK2 ZNFX1 RIPK1 OXSR1 LRRK2
0.15007	3	159	4.45069	GO:0070555 response to interleukin-1	http://amigo.geneontology.org/amigo/term/GO:0070555	RIPK2 HDAC4 IRAK4
0.15007	2	64	7.37146	GO:0070918 primary sncRNA processing	http://amigo.geneontology.org/amigo/term/GO:0070918	AGO3 RIPK1
0.15007	3	159	4.45069	GO:0098732 macromolecule deacylation	http://amigo.geneontology.org/amigo/term/GO:0098732	HDAC4 LRRK2 SGF29
0.15007	2	64	7.37146	GO:1901016 regulation of potassium ion transmembrane transporter activity	http://amigo.geneontology.org/amigo/term/GO:1901016	ABCC9 OXSR1
0.15007	2	64	7.37146	GO:1902808 positive regulation of cell cycle G1/S phase transition	http://amigo.geneontology.org/amigo/term/GO:1902808	CENPJ PLRG1
0.150251	4	277	3.4063	GO:0050730 regulation of peptidyl-tyrosine phosphorylation	http://amigo.geneontology.org/amigo/term/GO:0050730	MVP RIPK2 CNTN1 LRRK1
0.150713	13	1728	1.77461	GO:0051707 response to other organism	http://amigo.geneontology.org/amigo/term/GO:0051707	RIPK2 MX2 DAPK3 DAPK1 FGFR2 CD209 ZNFX1 FLNB HMCN1 IRAK4 IPO7 MRC1 ABCC9
0.151187	3	160	4.42287	GO:0030902 hindbrain development	http://amigo.geneontology.org/amigo/term/GO:0030902	CNTN1 PTPRS MT-CO1
0.151187	3	160	4.42287	GO:0048659 smooth muscle cell proliferation	http://amigo.geneontology.org/amigo/term/GO:0048659	FGFR2 HDAC4 IRAK4
0.151762	13	1731	1.77153	GO:0043207 response to external biotic stimulus	http://amigo.geneontology.org/amigo/term/GO:0043207	RIPK2 MX2 DAPK3 DAPK1 FGFR2 CD209 ZNFX1 FLNB HMCN1 IRAK4 IPO7 MRC1 ABCC9
0.152277	2	65	7.25805	GO:0032608 interferon-beta production	http://amigo.geneontology.org/amigo/term/GO:0032608	PTPRS RIPK2
0.152277	2	65	7.25805	GO:0032648 regulation of interferon-beta production	http://amigo.geneontology.org/amigo/term/GO:0032648	PTPRS RIPK2
0.152277	2	65	7.25805	GO:0090311 regulation of protein deacetylation	http://amigo.geneontology.org/amigo/term/GO:0090311	LRRK2 SGF29
0.152653	5	413	2.85577	GO:0045862 positive regulation of proteolysis	http://amigo.geneontology.org/amigo/term/GO:0045862	RIPK2 DAPK1 CLPX LRRK2 TMTC3
0.154434	1	8	29.4858	GO:0003149 membranous septum morphogenesis	http://amigo.geneontology.org/amigo/term/GO:0003149	FGFR2
0.154434	2	67	7.04139	GO:0003170 heart valve development	http://amigo.geneontology.org/amigo/term/GO:0003170	TIE1 ROBO2
0.154434	1	8	29.4858	GO:0006477 protein sulfation	http://amigo.geneontology.org/amigo/term/GO:0006477	TPST1
0.154434	3	165	4.28885	GO:0007605 sensory perception of sound	http://amigo.geneontology.org/amigo/term/GO:0007605	USH2A PTPRQ EYA1
0.154434	1	8	29.4858	GO:0009178 pyrimidine deoxyribonucleoside monophosphate catabolic process	http://amigo.geneontology.org/amigo/term/GO:0009178	DPYS
0.154434	1	8	29.4858	GO:0010989 negative regulation of low-density lipoprotein particle clearance	http://amigo.geneontology.org/amigo/term/GO:0010989	CSK
0.154434	1	8	29.4858	GO:0014041 regulation of neuron maturation	http://amigo.geneontology.org/amigo/term/GO:0014041	LRRK2
0.154434	1	8	29.4858	GO:0016576 histone dephosphorylation	http://amigo.geneontology.org/amigo/term/GO:0016576	EYA1
0.154434	4	283	3.33409	GO:0022898 regulation of transmembrane transporter activity	http://amigo.geneontology.org/amigo/term/GO:0022898	ABCC9 OXSR1 DAPK1 RIPK1
0.154434	1	8	29.4858	GO:0030916 otic vesicle formation	http://amigo.geneontology.org/amigo/term/GO:0030916	FGFR2
0.154434	1	8	29.4858	GO:0033278 cell proliferation in midbrain	http://amigo.geneontology.org/amigo/term/GO:0033278	RYK
0.154434	1	8	29.4858	GO:0034091 regulation of maintenance of sister chromatid cohesion	http://amigo.geneontology.org/amigo/term/GO:0034091	ATRX
0.154434	1	8	29.4858	GO:0034182 regulation of maintenance of mitotic sister chromatid cohesion	http://amigo.geneontology.org/amigo/term/GO:0034182	ATRX
0.154434	1	8	29.4858	GO:0044805 late nucleophagy	http://amigo.geneontology.org/amigo/term/GO:0044805	ULK2
0.154434	1	8	29.4858	GO:0046078 dUMP metabolic process	http://amigo.geneontology.org/amigo/term/GO:0046078	DPYS
0.154434	4	285	3.31069	GO:0051348 negative regulation of transferase activity	http://amigo.geneontology.org/amigo/term/GO:0051348	MVP PIF1 CSK IPO7
0.154434	1	8	29.4858	GO:0060179 male mating behavior	http://amigo.geneontology.org/amigo/term/GO:0060179	HDAC4
0.154434	1	8	29.4858	GO:0060484 lung-associated mesenchyme development	http://amigo.geneontology.org/amigo/term/GO:0060484	FGFR2
0.154434	1	8	29.4858	GO:0060836 lymphatic endothelial cell differentiation	http://amigo.geneontology.org/amigo/term/GO:0060836	TIE1
0.154434	1	8	29.4858	GO:0060872 semicircular canal development	http://amigo.geneontology.org/amigo/term/GO:0060872	EYA1
0.154434	1	8	29.4858	GO:0061511 centriole elongation	http://amigo.geneontology.org/amigo/term/GO:0061511	CENPJ
0.154434	1	8	29.4858	GO:0061762 CAMKK-AMPK signaling cascade	http://amigo.geneontology.org/amigo/term/GO:0061762	LRRK2
0.154434	1	8	29.4858	GO:0071374 cellular response to parathyroid hormone stimulus	http://amigo.geneontology.org/amigo/term/GO:0071374	HDAC4
0.154434	1	8	29.4858	GO:0071447 cellular response to hydroperoxide	http://amigo.geneontology.org/amigo/term/GO:0071447	DAPK1
0.154434	1	8	29.4858	GO:0071838 cell proliferation in bone marrow	http://amigo.geneontology.org/amigo/term/GO:0071838	FGFR2
0.154434	1	8	29.4858	GO:0090045 positive regulation of deacetylase activity	http://amigo.geneontology.org/amigo/term/GO:0090045	LRRK2
0.154434	1	8	29.4858	GO:0098528 skeletal muscle fiber differentiation	http://amigo.geneontology.org/amigo/term/GO:0098528	HDAC4
0.154434	1	8	29.4858	GO:1901748 leukotriene D4 metabolic process	http://amigo.geneontology.org/amigo/term/GO:1901748	GGT1
0.154434	1	8	29.4858	GO:1901750 leukotriene D4 biosynthetic process	http://amigo.geneontology.org/amigo/term/GO:1901750	GGT1
0.154434	1	8	29.4858	GO:1902857 positive regulation of non-motile cilium assembly	http://amigo.geneontology.org/amigo/term/GO:1902857	CENPJ
0.154434	1	8	29.4858	GO:1903423 positive regulation of synaptic vesicle recycling	http://amigo.geneontology.org/amigo/term/GO:1903423	LRRK2
0.154434	2	67	7.04139	GO:1904356 regulation of telomere maintenance via telomere lengthening	http://amigo.geneontology.org/amigo/term/GO:1904356	PIF1 NAT10
0.154434	1	8	29.4858	GO:1905832 positive regulation of spindle assembly	http://amigo.geneontology.org/amigo/term/GO:1905832	CENPJ
0.155468	2	68	6.93784	GO:0007405 neuroblast proliferation	http://amigo.geneontology.org/amigo/term/GO:0007405	LRRK2 FGFR2
0.155468	2	68	6.93784	GO:0045453 bone resorption	http://amigo.geneontology.org/amigo/term/GO:0045453	CSK LRRK1
0.155468	2	68	6.93784	GO:1905515 non-motile cilium assembly	http://amigo.geneontology.org/amigo/term/GO:1905515	TTC8 CENPJ
0.155696	8	883	2.13714	GO:0097435 supramolecular fiber organization	http://amigo.geneontology.org/amigo/term/GO:0097435	CENPJ KPTN PTPRQ TTC8 DAPK3 RIPK1 HMCN1 TLL1
0.156728	10	1222	1.93033	GO:0044092 negative regulation of molecular function	http://amigo.geneontology.org/amigo/term/GO:0044092	MVP PIF1 UBXN1 LRRK2 CSK TTC8 OXSR1 HDAC4 OXA1L IPO7
0.156728	3	167	4.23748	GO:0048592 eye morphogenesis	http://amigo.geneontology.org/amigo/term/GO:0048592	SDK2 TTC8 DSCAM
0.158132	2	69	6.83729	GO:0016925 protein sumoylation	http://amigo.geneontology.org/amigo/term/GO:0016925	HDAC4 EYA1
0.158132	2	69	6.83729	GO:0031638 zymogen activation	http://amigo.geneontology.org/amigo/term/GO:0031638	GGT1 RIPK2
0.158132	21	3300	1.5011	GO:0070887 cellular response to chemical stimulus	http://amigo.geneontology.org/amigo/term/GO:0070887	LRRK2 IRAK4 RIPK1 FGFR2 RIPK2 TRPA1 FBP1 DAPK3 NET1 DAPK1 HDAC4 ATRX CSK FLNB NPC1 GRIA1 RYK OXSR1 FAT4 MRC1 ROBO2
0.159825	14	1964	1.68147	GO:0006508 proteolysis	http://amigo.geneontology.org/amigo/term/GO:0006508	TLL1 PSMD7 WDR48 WDR26 CLPX LRRK2 GGT1 ATG4A RIPK2 UBXN1 ATG4B SGF29 DAPK1 TMTC3
0.159825	1	9	26.2096	GO:0006751 glutathione catabolic process	http://amigo.geneontology.org/amigo/term/GO:0006751	GGT1
0.159825	6	578	2.44865	GO:0007005 mitochondrion organization	http://amigo.geneontology.org/amigo/term/GO:0007005	ULK2 OXA1L LRRK2 PIF1 ATG4B MTCH2
0.159825	12	1594	1.77581	GO:0007010 cytoskeleton organization	http://amigo.geneontology.org/amigo/term/GO:0007010	CENPJ TTLL6 NAT10 DAPK3 FARP2 ATRX KPTN FLNB TTC8 BRCA2 HMCN1 FGD6
0.159825	15	2143	1.6511	GO:0008283 cell population proliferation	http://amigo.geneontology.org/amigo/term/GO:0008283	FGFR2 CD209 BRCA2 TIE1 HDAC4 CSK RIPK2 EYA1 WDR48 AGO3 TAF8 RYK FAT4 IRAK4 LRRK2
0.159825	1	9	26.2096	GO:0009131 pyrimidine nucleoside monophosphate catabolic process	http://amigo.geneontology.org/amigo/term/GO:0009131	DPYS
0.159825	1	9	26.2096	GO:0009222 pyrimidine ribonucleotide catabolic process	http://amigo.geneontology.org/amigo/term/GO:0009222	DPYS
0.159825	13	1771	1.73152	GO:0009607 response to biotic stimulus	http://amigo.geneontology.org/amigo/term/GO:0009607	RIPK2 MX2 DAPK3 DAPK1 FGFR2 CD209 ZNFX1 FLNB HMCN1 IRAK4 IPO7 MRC1 ABCC9
0.159825	1	9	26.2096	GO:0014877 response to muscle inactivity involved in regulation of muscle adaptation	http://amigo.geneontology.org/amigo/term/GO:0014877	HDAC4
0.159825	1	9	26.2096	GO:0014894 response to denervation involved in regulation of muscle adaptation	http://amigo.geneontology.org/amigo/term/GO:0014894	HDAC4
0.159825	3	172	4.1143	GO:0016241 regulation of macroautophagy	http://amigo.geneontology.org/amigo/term/GO:0016241	LRRK2 RIPK2 NPC1
0.159825	3	173	4.09052	GO:0016579 protein deubiquitination	http://amigo.geneontology.org/amigo/term/GO:0016579	WDR48 UBXN1 SGF29
0.159825	1	9	26.2096	GO:0017185 peptidyl-lysine hydroxylation	http://amigo.geneontology.org/amigo/term/GO:0017185	JMJD6
0.159825	1	9	26.2096	GO:0032687 negative regulation of interferon-alpha production	http://amigo.geneontology.org/amigo/term/GO:0032687	PTPRS
0.159825	1	9	26.2096	GO:0033292 T-tubule organization	http://amigo.geneontology.org/amigo/term/GO:0033292	MYOF
0.159825	1	9	26.2096	GO:0033615 mitochondrial proton-transporting ATP synthase complex assembly	http://amigo.geneontology.org/amigo/term/GO:0033615	OXA1L
0.159825	1	9	26.2096	GO:0034983 peptidyl-lysine deacetylation	http://amigo.geneontology.org/amigo/term/GO:0034983	HDAC4
0.159825	1	9	26.2096	GO:0036289 peptidyl-serine autophosphorylation	http://amigo.geneontology.org/amigo/term/GO:0036289	RIPK1
0.159825	1	9	26.2096	GO:0043461 proton-transporting ATP synthase complex assembly	http://amigo.geneontology.org/amigo/term/GO:0043461	OXA1L
0.159825	1	9	26.2096	GO:0046601 positive regulation of centriole replication	http://amigo.geneontology.org/amigo/term/GO:0046601	CENPJ
0.159825	1	9	26.2096	GO:0048102 autophagic cell death	http://amigo.geneontology.org/amigo/term/GO:0048102	DAPK1
0.159825	1	9	26.2096	GO:0048312 intracellular distribution of mitochondria	http://amigo.geneontology.org/amigo/term/GO:0048312	LRRK2
0.159825	1	9	26.2096	GO:0048478 replication fork protection	http://amigo.geneontology.org/amigo/term/GO:0048478	BRCA2
0.159825	3	172	4.1143	GO:0048771 tissue remodeling	http://amigo.geneontology.org/amigo/term/GO:0048771	TIE1 CSK LRRK1
0.159825	2	72	6.55241	GO:0050922 negative regulation of chemotaxis	http://amigo.geneontology.org/amigo/term/GO:0050922	ROBO2 RYK
0.159825	3	170	4.1627	GO:0055088 lipid homeostasis	http://amigo.geneontology.org/amigo/term/GO:0055088	ABHD8 NPC1 MTCH2
0.159825	2	71	6.64469	GO:0060411 cardiac septum morphogenesis	http://amigo.geneontology.org/amigo/term/GO:0060411	FGFR2 ROBO2
0.159825	2	70	6.73962	GO:0060675 ureteric bud morphogenesis	http://amigo.geneontology.org/amigo/term/GO:0060675	EYA1 FAT4
0.159825	1	9	26.2096	GO:0070922 RISC complex assembly	http://amigo.geneontology.org/amigo/term/GO:0070922	AGO3
0.159825	1	9	26.2096	GO:0070933 histone H4 deacetylation	http://amigo.geneontology.org/amigo/term/GO:0070933	HDAC4
0.159825	1	9	26.2096	GO:0070973 protein localization to endoplasmic reticulum exit site	http://amigo.geneontology.org/amigo/term/GO:0070973	LRRK2
0.159825	1	9	26.2096	GO:0071169 establishment of protein localization to chromatin	http://amigo.geneontology.org/amigo/term/GO:0071169	SGF29
0.159825	1	9	26.2096	GO:0071225 cellular response to muramyl dipeptide	http://amigo.geneontology.org/amigo/term/GO:0071225	RIPK2
0.159825	1	9	26.2096	GO:0071476 cellular hypotonic response	http://amigo.geneontology.org/amigo/term/GO:0071476	OXSR1
0.159825	2	71	6.64469	GO:0072171 mesonephric tubule morphogenesis	http://amigo.geneontology.org/amigo/term/GO:0072171	EYA1 FAT4
0.159825	1	9	26.2096	GO:0090394 negative regulation of excitatory postsynaptic potential	http://amigo.geneontology.org/amigo/term/GO:0090394	LRRK2
0.159825	1	9	26.2096	GO:0097064 ncRNA export from nucleus	http://amigo.geneontology.org/amigo/term/GO:0097064	XPOT
0.159825	1	9	26.2096	GO:0099004 calmodulin dependent kinase signaling pathway	http://amigo.geneontology.org/amigo/term/GO:0099004	LRRK2
0.159825	1	9	26.2096	GO:1901725 regulation of histone deacetylase activity	http://amigo.geneontology.org/amigo/term/GO:1901725	LRRK2
0.159825	1	9	26.2096	GO:1903251 multi-ciliated epithelial cell differentiation	http://amigo.geneontology.org/amigo/term/GO:1903251	TTC8
0.159825	1	9	26.2096	GO:1904415 regulation of xenophagy	http://amigo.geneontology.org/amigo/term/GO:1904415	RIPK2
0.159825	1	9	26.2096	GO:1904417 positive regulation of xenophagy	http://amigo.geneontology.org/amigo/term/GO:1904417	RIPK2
0.159825	2	71	6.64469	GO:2000379 positive regulation of reactive oxygen species metabolic process	http://amigo.geneontology.org/amigo/term/GO:2000379	HDAC4 RIPK1
0.160604	5	435	2.71134	GO:0009410 response to xenobiotic stimulus	http://amigo.geneontology.org/amigo/term/GO:0009410	FBP1 HDAC4 TRPA1 NPC1 OXSR1
0.160956	3	174	4.06701	GO:0009267 cellular response to starvation	http://amigo.geneontology.org/amigo/term/GO:0009267	KPTN TTC5 LRRK2
0.162657	2	73	6.46265	GO:0001961 positive regulation of cytokine-mediated signaling pathway	http://amigo.geneontology.org/amigo/term/GO:0001961	RIPK2 RIPK1
0.162657	2	73	6.46265	GO:0007004 telomere maintenance via telomerase	http://amigo.geneontology.org/amigo/term/GO:0007004	PIF1 NAT10
0.162657	2	73	6.46265	GO:0045911 positive regulation of DNA recombination	http://amigo.geneontology.org/amigo/term/GO:0045911	WDR48 MSH2
0.164132	4	300	3.14515	GO:0032409 regulation of transporter activity	http://amigo.geneontology.org/amigo/term/GO:0032409	ABCC9 OXSR1 DAPK1 RIPK1
0.164132	3	176	4.02079	GO:0050657 nucleic acid transport	http://amigo.geneontology.org/amigo/term/GO:0050657	XPOT MVP MX2
0.164132	3	176	4.02079	GO:0050658 RNA transport	http://amigo.geneontology.org/amigo/term/GO:0050658	XPOT MVP MX2
0.165399	18	2748	1.54511	GO:0031324 negative regulation of cellular metabolic process	http://amigo.geneontology.org/amigo/term/GO:0031324	HDAC4 LRRK2 MVP MSH2 AGO3 PIF1 UBXN1 FBP1 DAPK3 DAPK1 ATRX CSK BRCA2 NPC1 LRRK1 NAT10 FGFR2 IPO7
0.167167	9	1081	1.9639	GO:0003006 developmental process involved in reproduction	http://amigo.geneontology.org/amigo/term/GO:0003006	ATRX MSH2 WDR48 BRCA2 CSMD1 LRRK2 ROBO2 FGFR2 GGT1
0.167831	2	75	6.29031	GO:0001736 establishment of planar polarity	http://amigo.geneontology.org/amigo/term/GO:0001736	RYK TTC8
0.167831	1	10	23.5887	GO:0003266 regulation of secondary heart field cardioblast proliferation	http://amigo.geneontology.org/amigo/term/GO:0003266	EYA1
0.167831	2	75	6.29031	GO:0003281 ventricular septum development	http://amigo.geneontology.org/amigo/term/GO:0003281	FGFR2 ROBO2
0.167831	3	180	3.93144	GO:0007009 plasma membrane organization	http://amigo.geneontology.org/amigo/term/GO:0007009	MYOF TIE1 FAT4
0.167831	2	75	6.29031	GO:0007164 establishment of tissue polarity	http://amigo.geneontology.org/amigo/term/GO:0007164	RYK TTC8
0.167831	1	10	23.5887	GO:0014870 response to muscle inactivity	http://amigo.geneontology.org/amigo/term/GO:0014870	HDAC4
0.167831	1	10	23.5887	GO:0030388 fructose 1,6-bisphosphate metabolic process	http://amigo.geneontology.org/amigo/term/GO:0030388	FBP1
0.167831	1	10	23.5887	GO:0038007 netrin-activated signaling pathway	http://amigo.geneontology.org/amigo/term/GO:0038007	DSCAM
0.167831	9	1085	1.95666	GO:0040012 regulation of locomotion	http://amigo.geneontology.org/amigo/term/GO:0040012	DSCAM ROBO2 TIE1 HDAC4 RYK DAPK3 TTLL6 OXSR1 LRRK2
0.167831	1	10	23.5887	GO:0042276 error-prone translesion synthesis	http://amigo.geneontology.org/amigo/term/GO:0042276	REV3L
0.167831	1	10	23.5887	GO:0045625 regulation of T-helper 1 cell differentiation	http://amigo.geneontology.org/amigo/term/GO:0045625	RIPK2
0.167831	1	10	23.5887	GO:0046968 peptide antigen transport	http://amigo.geneontology.org/amigo/term/GO:0046968	CD209
0.167831	1	10	23.5887	GO:0048304 positive regulation of isotype switching to IgG isotypes	http://amigo.geneontology.org/amigo/term/GO:0048304	MSH2
0.167831	1	10	23.5887	GO:0051096 positive regulation of helicase activity	http://amigo.geneontology.org/amigo/term/GO:0051096	MSH2
0.167831	3	179	3.95341	GO:0051236 establishment of RNA localization	http://amigo.geneontology.org/amigo/term/GO:0051236	XPOT MVP MX2
0.167831	1	10	23.5887	GO:0060296 regulation of cilium beat frequency involved in ciliary motility	http://amigo.geneontology.org/amigo/term/GO:0060296	TTLL6
0.167831	1	10	23.5887	GO:0060502 epithelial cell proliferation involved in lung morphogenesis	http://amigo.geneontology.org/amigo/term/GO:0060502	FGFR2
0.167831	1	10	23.5887	GO:0060525 prostate glandular acinus development	http://amigo.geneontology.org/amigo/term/GO:0060525	FGFR2
0.167831	1	10	23.5887	GO:0070391 response to lipoteichoic acid	http://amigo.geneontology.org/amigo/term/GO:0070391	RIPK2
0.167831	1	10	23.5887	GO:0071223 cellular response to lipoteichoic acid	http://amigo.geneontology.org/amigo/term/GO:0071223	RIPK2
0.167831	1	10	23.5887	GO:0099566 regulation of postsynaptic cytosolic calcium ion concentration	http://amigo.geneontology.org/amigo/term/GO:0099566	GRIA1
0.167831	1	10	23.5887	GO:1902884 positive regulation of response to oxidative stress	http://amigo.geneontology.org/amigo/term/GO:1902884	RIPK1
0.167831	1	10	23.5887	GO:1903748 negative regulation of establishment of protein localization to mitochondrion	http://amigo.geneontology.org/amigo/term/GO:1903748	LRRK2
0.167831	1	10	23.5887	GO:1903800 positive regulation of production of miRNAs involved in gene silencing by miRNA	http://amigo.geneontology.org/amigo/term/GO:1903800	RIPK1
0.167831	1	10	23.5887	GO:1903980 positive regulation of microglial cell activation	http://amigo.geneontology.org/amigo/term/GO:1903980	LRRK2
0.167831	1	10	23.5887	GO:1905809 negative regulation of synapse organization	http://amigo.geneontology.org/amigo/term/GO:1905809	ROBO2
0.167831	1	10	23.5887	GO:2000563 positive regulation of CD4-positive alpha-beta T cell proliferation	http://amigo.geneontology.org/amigo/term/GO:2000563	RIPK2
0.168413	6	598	2.36676	GO:0007507 heart development	http://amigo.geneontology.org/amigo/term/GO:0007507	TIE1 JMJD6 EYA1 FAT4 FGFR2 ROBO2
0.170219	5	449	2.6268	GO:0006417 regulation of translation	http://amigo.geneontology.org/amigo/term/GO:0006417	ELP4 AGO3 NAT10 DAPK3 DAPK1
0.17259	3	183	3.86699	GO:0046718 viral entry into host cell	http://amigo.geneontology.org/amigo/term/GO:0046718	CD209 NPC1 MRC1
0.172944	10	1272	1.85445	GO:1901701 cellular response to oxygen-containing compound	http://amigo.geneontology.org/amigo/term/GO:1901701	LRRK2 RIPK2 TRPA1 NET1 FGFR2 CSK RIPK1 FBP1 MRC1 DAPK1
0.173268	2	78	6.04837	GO:0030199 collagen fibril organization	http://amigo.geneontology.org/amigo/term/GO:0030199	PTPRQ TLL1
0.173268	2	78	6.04837	GO:0043462 regulation of ATP-dependent activity	http://amigo.geneontology.org/amigo/term/GO:0043462	MSH2 OXA1L
0.173268	2	78	6.04837	GO:0071479 cellular response to ionizing radiation	http://amigo.geneontology.org/amigo/term/GO:0071479	NET1 BRCA2
0.175759	2	79	5.97181	GO:0001707 mesoderm formation	http://amigo.geneontology.org/amigo/term/GO:0001707	FGFR2 EYA1
0.175759	1	11	21.4442	GO:0003263 cardioblast proliferation	http://amigo.geneontology.org/amigo/term/GO:0003263	EYA1
0.175759	1	11	21.4442	GO:0003264 regulation of cardioblast proliferation	http://amigo.geneontology.org/amigo/term/GO:0003264	EYA1
0.175759	1	11	21.4442	GO:0006002 fructose 6-phosphate metabolic process	http://amigo.geneontology.org/amigo/term/GO:0006002	FBP1
0.175759	1	11	21.4442	GO:0006971 hypotonic response	http://amigo.geneontology.org/amigo/term/GO:0006971	OXSR1
0.175759	22	3602	1.44073	GO:0010646 regulation of cell communication	http://amigo.geneontology.org/amigo/term/GO:0010646	CSK RIPK2 EYA1 KPTN LRRK1 NET1 LRRK2 IRAK4 BRCA2 MVP RIPK1 CENPJ RYK FBP1 PTPRS AGO3 CNTN6 GRIA1 DAPK1 FGFR2 DAPK3 ROBO2
0.175759	1	11	21.4442	GO:0010985 negative regulation of lipoprotein particle clearance	http://amigo.geneontology.org/amigo/term/GO:0010985	CSK
0.175759	1	11	21.4442	GO:0019062 virion attachment to host cell	http://amigo.geneontology.org/amigo/term/GO:0019062	CD209
0.175759	4	315	2.99539	GO:0021700 developmental maturation	http://amigo.geneontology.org/amigo/term/GO:0021700	FARP2 BRCA2 FAT4 LRRK2
0.175759	1	11	21.4442	GO:0021889 olfactory bulb interneuron differentiation	http://amigo.geneontology.org/amigo/term/GO:0021889	ROBO2
0.175759	7	769	2.14721	GO:0030036 actin cytoskeleton organization	http://amigo.geneontology.org/amigo/term/GO:0030036	DAPK3 FARP2 KPTN FLNB TTC8 HMCN1 FGD6
0.175759	2	79	5.97181	GO:0030330 DNA damage response signal transduction by p53 class mediator	http://amigo.geneontology.org/amigo/term/GO:0030330	ATRX BRCA2
0.175759	1	11	21.4442	GO:0030953 astral microtubule organization	http://amigo.geneontology.org/amigo/term/GO:0030953	CENPJ
0.175759	10	1280	1.84286	GO:0043085 positive regulation of catalytic activity	http://amigo.geneontology.org/amigo/term/GO:0043085	TIE1 FGFR2 RYK LRRK2 MSH2 RIPK2 DAPK1 CSK CLPX NET1
0.175759	4	313	3.01453	GO:0043588 skin development	http://amigo.geneontology.org/amigo/term/GO:0043588	WDR48 FLNB FRAS1 FGFR2
0.175759	15	2204	1.6054	GO:0045935 positive regulation of nucleobase-containing compound metabolic process	http://amigo.geneontology.org/amigo/term/GO:0045935	EYA1 SGF29 JMJD6 WDR48 RIPK1 TAF8 BRCA2 HDAC4 ATRX MSH2 AGO3 TTC5 CENPJ FGFR2 RIPK2
0.175759	3	186	3.80462	GO:0048736 appendage development	http://amigo.geneontology.org/amigo/term/GO:0048736	ATRX FRAS1 FGFR2
0.175759	5	455	2.59216	GO:0050673 epithelial cell proliferation	http://amigo.geneontology.org/amigo/term/GO:0050673	BRCA2 TIE1 FGFR2 EYA1 WDR48
0.175759	1	11	21.4442	GO:0051013 microtubule severing	http://amigo.geneontology.org/amigo/term/GO:0051013	TTLL6
0.175759	1	11	21.4442	GO:0060159 regulation of dopamine receptor signaling pathway	http://amigo.geneontology.org/amigo/term/GO:0060159	LRRK2
0.175759	3	186	3.80462	GO:0060173 limb development	http://amigo.geneontology.org/amigo/term/GO:0060173	ATRX FRAS1 FGFR2
0.175759	1	11	21.4442	GO:0060742 epithelial cell differentiation involved in prostate gland development	http://amigo.geneontology.org/amigo/term/GO:0060742	FGFR2
0.175759	1	11	21.4442	GO:0070673 response to interleukin-18	http://amigo.geneontology.org/amigo/term/GO:0070673	RIPK2
0.175759	1	11	21.4442	GO:0071679 commissural neuron axon guidance	http://amigo.geneontology.org/amigo/term/GO:0071679	RYK
0.175759	2	79	5.97181	GO:0072078 nephron tubule morphogenesis	http://amigo.geneontology.org/amigo/term/GO:0072078	EYA1 FAT4
0.175759	1	11	21.4442	GO:0090527 actin filament reorganization	http://amigo.geneontology.org/amigo/term/GO:0090527	HMCN1
0.175759	1	11	21.4442	GO:0150065 regulation of deacetylase activity	http://amigo.geneontology.org/amigo/term/GO:0150065	LRRK2
0.176421	3	188	3.76415	GO:0009451 RNA modification	http://amigo.geneontology.org/amigo/term/GO:0009451	ELP4 NAT10 JMJD6
0.176549	4	317	2.97649	GO:0051054 positive regulation of DNA metabolic process	http://amigo.geneontology.org/amigo/term/GO:0051054	EYA1 WDR48 ATRX MSH2
0.176698	2	81	5.82436	GO:0008543 fibroblast growth factor receptor signaling pathway	http://amigo.geneontology.org/amigo/term/GO:0008543	FGFR2 FAT4
0.176698	2	81	5.82436	GO:0043966 histone H3 acetylation	http://amigo.geneontology.org/amigo/term/GO:0043966	SGF29 BRCA2
0.176698	2	81	5.82436	GO:0048332 mesoderm morphogenesis	http://amigo.geneontology.org/amigo/term/GO:0048332	FGFR2 EYA1
0.176698	2	81	5.82436	GO:0050772 positive regulation of axonogenesis	http://amigo.geneontology.org/amigo/term/GO:0050772	DSCAM ROBO2
0.176698	2	81	5.82436	GO:0060760 positive regulation of response to cytokine stimulus	http://amigo.geneontology.org/amigo/term/GO:0060760	RIPK2 RIPK1
0.176698	2	81	5.82436	GO:0072088 nephron epithelium morphogenesis	http://amigo.geneontology.org/amigo/term/GO:0072088	EYA1 FAT4
0.176811	3	189	3.74423	GO:0072331 signal transduction by p53 class mediator	http://amigo.geneontology.org/amigo/term/GO:0072331	ATRX MSH2 BRCA2
0.177907	17	2609	1.53702	GO:0071310 cellular response to organic substance	http://amigo.geneontology.org/amigo/term/GO:0071310	LRRK2 IRAK4 RIPK1 FGFR2 RIPK2 DAPK3 DAPK1 HDAC4 CSK TRPA1 FLNB NPC1 FBP1 OXSR1 FAT4 MRC1 ROBO2
0.178633	3	190	3.72453	GO:0044409 entry into host	http://amigo.geneontology.org/amigo/term/GO:0044409	CD209 NPC1 MRC1
0.178905	22	3615	1.43555	GO:0023051 regulation of signaling	http://amigo.geneontology.org/amigo/term/GO:0023051	CSK RIPK2 EYA1 KPTN LRRK1 NET1 LRRK2 IRAK4 BRCA2 MVP RIPK1 CENPJ RYK FBP1 PTPRS AGO3 CNTN6 GRIA1 DAPK1 FGFR2 DAPK3 ROBO2
0.18046	3	191	3.70503	GO:0031056 regulation of histone modification	http://amigo.geneontology.org/amigo/term/GO:0031056	LRRK2 ATRX SGF29
0.180574	1	12	19.6572	GO:0002357 defense response to tumor cell	http://amigo.geneontology.org/amigo/term/GO:0002357	DAPK1
0.180574	1	12	19.6572	GO:0005984 disaccharide metabolic process	http://amigo.geneontology.org/amigo/term/GO:0005984	FBP1
0.180574	1	12	19.6572	GO:0006534 cysteine metabolic process	http://amigo.geneontology.org/amigo/term/GO:0006534	GGT1
0.180574	1	12	19.6572	GO:0009176 pyrimidine deoxyribonucleoside monophosphate metabolic process	http://amigo.geneontology.org/amigo/term/GO:0009176	DPYS
0.180574	7	781	2.11422	GO:0010564 regulation of cell cycle process	http://amigo.geneontology.org/amigo/term/GO:0010564	BRCA2 CENPJ NAT10 ATRX MSH2 PLRG1 DAPK3
0.180574	1	12	19.6572	GO:0016446 somatic hypermutation of immunoglobulin genes	http://amigo.geneontology.org/amigo/term/GO:0016446	MSH2
0.180574	3	194	3.64773	GO:0017148 negative regulation of translation	http://amigo.geneontology.org/amigo/term/GO:0017148	AGO3 DAPK3 DAPK1
0.180574	4	324	2.91218	GO:0018105 peptidyl-serine phosphorylation	http://amigo.geneontology.org/amigo/term/GO:0018105	ULK2 RIPK2 RIPK1 LRRK2
0.180574	1	12	19.6572	GO:0021860 pyramidal neuron development	http://amigo.geneontology.org/amigo/term/GO:0021860	FGFR2
0.180574	1	12	19.6572	GO:0031953 negative regulation of protein autophosphorylation	http://amigo.geneontology.org/amigo/term/GO:0031953	MVP
0.180574	1	12	19.6572	GO:0034086 maintenance of sister chromatid cohesion	http://amigo.geneontology.org/amigo/term/GO:0034086	ATRX
0.180574	1	12	19.6572	GO:0034088 maintenance of mitotic sister chromatid cohesion	http://amigo.geneontology.org/amigo/term/GO:0034088	ATRX
0.180574	1	12	19.6572	GO:0042996 regulation of Golgi to plasma membrane protein transport	http://amigo.geneontology.org/amigo/term/GO:0042996	CSK
0.180574	19	3024	1.48209	GO:0051239 regulation of multicellular organismal process	http://amigo.geneontology.org/amigo/term/GO:0051239	TIE1 ULK2 SGF29 RIPK2 RIPK1 BRCA2 DSCAM ROBO2 HDAC4 MSH2 CSK PTPRS CPT2 RYK LRRK2 FAT4 ABCC9 FGFR2 DAPK3
0.180574	5	470	2.50943	GO:0051960 regulation of nervous system development	http://amigo.geneontology.org/amigo/term/GO:0051960	ULK2 DSCAM ROBO2 PTPRS RYK
0.180574	1	12	19.6572	GO:0060368 regulation of Fc receptor mediated stimulatory signaling pathway	http://amigo.geneontology.org/amigo/term/GO:0060368	CSK
0.180574	1	12	19.6572	GO:0060442 branching involved in prostate gland morphogenesis	http://amigo.geneontology.org/amigo/term/GO:0060442	FGFR2
0.180574	1	12	19.6572	GO:0060601 lateral sprouting from an epithelium	http://amigo.geneontology.org/amigo/term/GO:0060601	FGFR2
0.180574	1	12	19.6572	GO:0060736 prostate gland growth	http://amigo.geneontology.org/amigo/term/GO:0060736	FGFR2
0.180574	2	83	5.68401	GO:0061333 renal tubule morphogenesis	http://amigo.geneontology.org/amigo/term/GO:0061333	EYA1 FAT4
0.180574	3	192	3.68573	GO:0070646 protein modification by small protein removal	http://amigo.geneontology.org/amigo/term/GO:0070646	WDR48 UBXN1 SGF29
0.180574	1	12	19.6572	GO:0071107 response to parathyroid hormone	http://amigo.geneontology.org/amigo/term/GO:0071107	HDAC4
0.180574	2	84	5.61635	GO:0072028 nephron morphogenesis	http://amigo.geneontology.org/amigo/term/GO:0072028	EYA1 FAT4
0.180574	1	12	19.6572	GO:0072711 cellular response to hydroxyurea	http://amigo.geneontology.org/amigo/term/GO:0072711	ATRX
0.180574	1	12	19.6572	GO:0090085 regulation of protein deubiquitination	http://amigo.geneontology.org/amigo/term/GO:0090085	UBXN1
0.180574	1	12	19.6572	GO:0090557 establishment of endothelial intestinal barrier	http://amigo.geneontology.org/amigo/term/GO:0090557	PTPRS
0.180574	1	12	19.6572	GO:0099151 regulation of postsynaptic density assembly	http://amigo.geneontology.org/amigo/term/GO:0099151	PTPRS
0.180574	13	1857	1.65133	GO:1902531 regulation of intracellular signal transduction	http://amigo.geneontology.org/amigo/term/GO:1902531	RIPK2 KPTN NET1 IRAK4 BRCA2 LRRK2 RIPK1 RYK FBP1 CSK AGO3 LRRK1 FGFR2
0.180574	1	12	19.6572	GO:1902855 regulation of non-motile cilium assembly	http://amigo.geneontology.org/amigo/term/GO:1902855	CENPJ
0.180574	4	323	2.9212	GO:1903311 regulation of mRNA metabolic process	http://amigo.geneontology.org/amigo/term/GO:1903311	JMJD6 SNRPA AGO3 TTC5
0.180574	11	1483	1.74966	GO:2000026 regulation of multicellular organismal development	http://amigo.geneontology.org/amigo/term/GO:2000026	TIE1 ULK2 SGF29 DSCAM ROBO2 RIPK2 PTPRS RYK FAT4 RIPK1 FGFR2
0.180649	9	1128	1.88207	GO:0051336 regulation of hydrolase activity	http://amigo.geneontology.org/amigo/term/GO:0051336	RIPK2 UBXN1 LRRK2 DAPK1 TTC8 CLPX FGD6 FGFR2 NET1
0.181203	5	471	2.5041	GO:0009314 response to radiation	http://amigo.geneontology.org/amigo/term/GO:0009314	EYA1 NET1 MSH2 BRCA2 EYS
0.181203	8	956	1.97395	GO:0051338 regulation of transferase activity	http://amigo.geneontology.org/amigo/term/GO:0051338	TIE1 FGFR2 RYK LRRK2 MVP PIF1 CSK IPO7
0.181836	5	472	2.4988	GO:0009259 ribonucleotide metabolic process	http://amigo.geneontology.org/amigo/term/GO:0009259	FBP1 LRRK2 HDAC4 DPYS TPST1
0.181836	23	3847	1.41029	GO:0010604 positive regulation of macromolecule metabolic process	http://amigo.geneontology.org/amigo/term/GO:0010604	EYA1 SGF29 LRRK2 HDAC4 JMJD6 RIPK2 WDR48 NAT10 RIPK1 TAF8 BRCA2 DAPK1 CNTN1 ATRX MSH2 CSK AGO3 TTC5 CENPJ LRRK1 CLPX TMTC3 FGFR2
0.181836	2	85	5.55027	GO:0038034 signal transduction in absence of ligand	http://amigo.geneontology.org/amigo/term/GO:0038034	EYA1 RIPK1
0.181836	2	85	5.55027	GO:0051865 protein autoubiquitination	http://amigo.geneontology.org/amigo/term/GO:0051865	BRCA2 LRRK2
0.181836	2	85	5.55027	GO:0097192 extrinsic apoptotic signaling pathway in absence of ligand	http://amigo.geneontology.org/amigo/term/GO:0097192	EYA1 RIPK1
0.182044	3	196	3.61051	GO:0010721 negative regulation of cell development	http://amigo.geneontology.org/amigo/term/GO:0010721	ULK2 PTPRS RYK
0.182044	5	473	2.49352	GO:0016055 Wnt signaling pathway	http://amigo.geneontology.org/amigo/term/GO:0016055	LRRK1 LRRK2 RYK DAPK3 FGFR2
0.182044	3	196	3.61051	GO:0048469 cell maturation	http://amigo.geneontology.org/amigo/term/GO:0048469	FARP2 BRCA2 LRRK2
0.182273	4	328	2.87667	GO:0034504 protein localization to nucleus	http://amigo.geneontology.org/amigo/term/GO:0034504	IPO7 TAF8 PLRG1 LRRK2
0.184027	2	86	5.48573	GO:0010833 telomere maintenance via telomere lengthening	http://amigo.geneontology.org/amigo/term/GO:0010833	PIF1 NAT10
0.184027	5	475	2.48302	GO:0198738 cell-cell signaling by wnt	http://amigo.geneontology.org/amigo/term/GO:0198738	LRRK1 LRRK2 RYK DAPK3 FGFR2
0.184027	2	86	5.48573	GO:1903201 regulation of oxidative stress-induced cell death	http://amigo.geneontology.org/amigo/term/GO:1903201	RIPK1 LRRK2
0.184497	1	13	18.1451	GO:0002566 somatic diversification of immune receptors via somatic mutation	http://amigo.geneontology.org/amigo/term/GO:0002566	MSH2
0.184497	1	13	18.1451	GO:0003353 positive regulation of cilium movement	http://amigo.geneontology.org/amigo/term/GO:0003353	TTLL6
0.184497	2	88	5.36106	GO:0006096 glycolytic process	http://amigo.geneontology.org/amigo/term/GO:0006096	FBP1 HDAC4
0.184497	6	634	2.23237	GO:0006897 endocytosis	http://amigo.geneontology.org/amigo/term/GO:0006897	MRC1 JMJD6 CD209 NPC1 GRIA1 LRRK2
0.184497	1	13	18.1451	GO:0007501 mesodermal cell fate specification	http://amigo.geneontology.org/amigo/term/GO:0007501	EYA1
0.184497	1	13	18.1451	GO:0009437 carnitine metabolic process	http://amigo.geneontology.org/amigo/term/GO:0009437	CPT2
0.184497	14	2068	1.59691	GO:0010557 positive regulation of macromolecule biosynthetic process	http://amigo.geneontology.org/amigo/term/GO:0010557	SGF29 JMJD6 NAT10 RIPK1 TAF8 BRCA2 HDAC4 ATRX EYA1 TTC5 CENPJ LRRK2 FGFR2 RIPK2
0.184497	1	13	18.1451	GO:0010635 regulation of mitochondrial fusion	http://amigo.geneontology.org/amigo/term/GO:0010635	MTCH2
0.184497	1	13	18.1451	GO:0014854 response to inactivity	http://amigo.geneontology.org/amigo/term/GO:0014854	HDAC4
0.184497	1	13	18.1451	GO:0018095 protein polyglutamylation	http://amigo.geneontology.org/amigo/term/GO:0018095	TTLL6
0.184497	11	1504	1.72523	GO:0032270 positive regulation of cellular protein metabolic process	http://amigo.geneontology.org/amigo/term/GO:0032270	LRRK2 HDAC4 RIPK2 NAT10 DAPK1 CNTN1 CSK LRRK1 CLPX RIPK1 TMTC3
0.184497	1	13	18.1451	GO:0033083 regulation of immature T cell proliferation	http://amigo.geneontology.org/amigo/term/GO:0033083	RIPK2
0.184497	1	13	18.1451	GO:0033084 regulation of immature T cell proliferation in thymus	http://amigo.geneontology.org/amigo/term/GO:0033084	RIPK2
0.184497	1	13	18.1451	GO:0033235 positive regulation of protein sumoylation	http://amigo.geneontology.org/amigo/term/GO:0033235	HDAC4
0.184497	1	13	18.1451	GO:0033262 regulation of nuclear cell cycle DNA replication	http://amigo.geneontology.org/amigo/term/GO:0033262	ATRX
0.184497	2	87	5.42268	GO:0042274 ribosomal small subunit biogenesis	http://amigo.geneontology.org/amigo/term/GO:0042274	WDR3 NAT10
0.184497	1	13	18.1451	GO:0044650 adhesion of symbiont to host cell	http://amigo.geneontology.org/amigo/term/GO:0044650	CD209
0.184497	1	13	18.1451	GO:0048742 regulation of skeletal muscle fiber development	http://amigo.geneontology.org/amigo/term/GO:0048742	HDAC4
0.184497	1	13	18.1451	GO:0051451 myoblast migration	http://amigo.geneontology.org/amigo/term/GO:0051451	NET1
0.184497	1	13	18.1451	GO:0051974 negative regulation of telomerase activity	http://amigo.geneontology.org/amigo/term/GO:0051974	PIF1
0.184497	1	13	18.1451	GO:0060174 limb bud formation	http://amigo.geneontology.org/amigo/term/GO:0060174	FGFR2
0.184497	1	13	18.1451	GO:0060670 branching involved in labyrinthine layer morphogenesis	http://amigo.geneontology.org/amigo/term/GO:0060670	FGFR2
0.184497	1	13	18.1451	GO:0061000 negative regulation of dendritic spine development	http://amigo.geneontology.org/amigo/term/GO:0061000	PTPRS
0.184497	1	13	18.1451	GO:0071287 cellular response to manganese ion	http://amigo.geneontology.org/amigo/term/GO:0071287	LRRK2
0.184497	4	332	2.84201	GO:0071496 cellular response to external stimulus	http://amigo.geneontology.org/amigo/term/GO:0071496	KPTN HDAC4 TTC5 LRRK2
0.184497	5	480	2.45715	GO:0072594 establishment of protein localization to organelle	http://amigo.geneontology.org/amigo/term/GO:0072594	OXA1L IPO7 LRRK2 BRCA2 SGF29
0.184497	1	13	18.1451	GO:0072710 response to hydroxyurea	http://amigo.geneontology.org/amigo/term/GO:0072710	ATRX
0.184497	1	13	18.1451	GO:0099150 regulation of postsynaptic specialization assembly	http://amigo.geneontology.org/amigo/term/GO:0099150	PTPRS
0.184497	1	13	18.1451	GO:1900242 regulation of synaptic vesicle endocytosis	http://amigo.geneontology.org/amigo/term/GO:1900242	LRRK2
0.184497	1	13	18.1451	GO:1900363 regulation of mRNA polyadenylation	http://amigo.geneontology.org/amigo/term/GO:1900363	SNRPA
0.184497	2	88	5.36106	GO:1900542 regulation of purine nucleotide metabolic process	http://amigo.geneontology.org/amigo/term/GO:1900542	FBP1 HDAC4
0.185909	5	482	2.44696	GO:0019693 ribose phosphate metabolic process	http://amigo.geneontology.org/amigo/term/GO:0019693	FBP1 LRRK2 HDAC4 DPYS TPST1
0.186872	5	483	2.44189	GO:0002696 positive regulation of leukocyte activation	http://amigo.geneontology.org/amigo/term/GO:0002696	CD209 MSH2 RIPK2 LRRK2 CSK
0.186872	2	89	5.30082	GO:0006757 ATP generation from ADP	http://amigo.geneontology.org/amigo/term/GO:0006757	FBP1 HDAC4
0.186872	7	804	2.05374	GO:0007276 gamete generation	http://amigo.geneontology.org/amigo/term/GO:0007276	ATRX MSH2 WDR48 MCM8 BRCA2 LRRK2 GGT1
0.186872	2	89	5.30082	GO:0033077 T cell differentiation in thymus	http://amigo.geneontology.org/amigo/term/GO:0033077	JMJD6 RIPK2
0.186872	2	89	5.30082	GO:1903578 regulation of ATP metabolic process	http://amigo.geneontology.org/amigo/term/GO:1903578	FBP1 HDAC4
0.187748	4	342	2.75891	GO:0001933 negative regulation of protein phosphorylation	http://amigo.geneontology.org/amigo/term/GO:0001933	MVP LRRK1 LRRK2 IPO7
0.187748	1	14	16.849	GO:0006000 fructose metabolic process	http://amigo.geneontology.org/amigo/term/GO:0006000	FBP1
0.187748	2	90	5.24192	GO:0006140 regulation of nucleotide metabolic process	http://amigo.geneontology.org/amigo/term/GO:0006140	FBP1 HDAC4
0.187748	2	90	5.24192	GO:0006513 protein monoubiquitination	http://amigo.geneontology.org/amigo/term/GO:0006513	BRCA2 WDR48
0.187748	3	205	3.452	GO:0006839 mitochondrial transport	http://amigo.geneontology.org/amigo/term/GO:0006839	OXA1L LRRK2 CPT2
0.187748	6	642	2.20455	GO:0007169 transmembrane receptor protein tyrosine kinase signaling pathway	http://amigo.geneontology.org/amigo/term/GO:0007169	TIE1 FGFR2 RYK MVP SVEP1 FAT4
0.187748	1	14	16.849	GO:0009159 deoxyribonucleoside monophosphate catabolic process	http://amigo.geneontology.org/amigo/term/GO:0009159	DPYS
0.187748	1	14	16.849	GO:0010225 response to UV-C	http://amigo.geneontology.org/amigo/term/GO:0010225	BRCA2
0.187748	2	91	5.18432	GO:0010507 negative regulation of autophagy	http://amigo.geneontology.org/amigo/term/GO:0010507	LRRK2 NPC1
0.187748	1	14	16.849	GO:0010832 negative regulation of myotube differentiation	http://amigo.geneontology.org/amigo/term/GO:0010832	HDAC4
0.187748	4	337	2.79984	GO:0030111 regulation of Wnt signaling pathway	http://amigo.geneontology.org/amigo/term/GO:0030111	LRRK1 LRRK2 DAPK3 FGFR2
0.187748	1	14	16.849	GO:0032494 response to peptidoglycan	http://amigo.geneontology.org/amigo/term/GO:0032494	RIPK2
0.187748	3	204	3.46892	GO:0032640 tumor necrosis factor production	http://amigo.geneontology.org/amigo/term/GO:0032640	RIPK1 RIPK2 LRRK2
0.187748	3	204	3.46892	GO:0032680 regulation of tumor necrosis factor production	http://amigo.geneontology.org/amigo/term/GO:0032680	RIPK1 RIPK2 LRRK2
0.187748	1	14	16.849	GO:0032688 negative regulation of interferon-beta production	http://amigo.geneontology.org/amigo/term/GO:0032688	PTPRS
0.187748	1	14	16.849	GO:0033079 immature T cell proliferation	http://amigo.geneontology.org/amigo/term/GO:0033079	RIPK2
0.187748	1	14	16.849	GO:0033080 immature T cell proliferation in thymus	http://amigo.geneontology.org/amigo/term/GO:0033080	RIPK2
0.187748	1	14	16.849	GO:0034163 regulation of toll-like receptor 9 signaling pathway	http://amigo.geneontology.org/amigo/term/GO:0034163	PTPRS
0.187748	1	14	16.849	GO:0034982 mitochondrial protein processing	http://amigo.geneontology.org/amigo/term/GO:0034982	LRRK2
0.187748	1	14	16.849	GO:0046049 UMP metabolic process	http://amigo.geneontology.org/amigo/term/GO:0046049	DPYS
0.187748	6	645	2.19429	GO:0048232 male gamete generation	http://amigo.geneontology.org/amigo/term/GO:0048232	ATRX WDR48 MCM8 BRCA2 LRRK2 GGT1
0.187748	1	14	16.849	GO:0048302 regulation of isotype switching to IgG isotypes	http://amigo.geneontology.org/amigo/term/GO:0048302	MSH2
0.187748	1	14	16.849	GO:0048681 negative regulation of axon regeneration	http://amigo.geneontology.org/amigo/term/GO:0048681	PTPRS
0.187748	2	91	5.18432	GO:0050805 negative regulation of synaptic transmission	http://amigo.geneontology.org/amigo/term/GO:0050805	GRIA1 LRRK2
0.187748	1	14	16.849	GO:0050966 detection of mechanical stimulus involved in sensory perception of pain	http://amigo.geneontology.org/amigo/term/GO:0050966	TRPA1
0.187748	3	203	3.48601	GO:0051302 regulation of cell division	http://amigo.geneontology.org/amigo/term/GO:0051302	SGF29 BRCA2 FGFR2
0.187748	6	646	2.1909	GO:0051345 positive regulation of hydrolase activity	http://amigo.geneontology.org/amigo/term/GO:0051345	RIPK2 DAPK1 CLPX LRRK2 FGFR2 NET1
0.187748	4	342	2.75891	GO:0051604 protein maturation	http://amigo.geneontology.org/amigo/term/GO:0051604	TLL1 LRRK2 GGT1 RIPK2
0.187748	1	14	16.849	GO:0055057 neuroblast division	http://amigo.geneontology.org/amigo/term/GO:0055057	FGFR2
0.187748	2	91	5.18432	GO:0061515 myeloid cell development	http://amigo.geneontology.org/amigo/term/GO:0061515	JMJD6 LRRK1
0.187748	24	4103	1.37979	GO:0065008 regulation of biological quality	http://amigo.geneontology.org/amigo/term/GO:0065008	ULK2 ABHD8 LRRK2 TRPA1 NPC1 DSCAM USH2A ABCC9 JMJD6 CSK PTPRS WDR48 AGO3 LRRK1 GRIA1 CPT2 RYK DAPK3 TTLL6 CSMD1 MCM8 MTCH2 FGD6 ROBO2
0.187748	1	14	16.849	GO:0070932 histone H3 deacetylation	http://amigo.geneontology.org/amigo/term/GO:0070932	HDAC4
0.187748	1	14	16.849	GO:0072182 regulation of nephron tubule epithelial cell differentiation	http://amigo.geneontology.org/amigo/term/GO:0072182	FAT4
0.187748	1	14	16.849	GO:0098792 xenophagy	http://amigo.geneontology.org/amigo/term/GO:0098792	RIPK2
0.187748	1	14	16.849	GO:1900112 regulation of histone H3-K9 trimethylation	http://amigo.geneontology.org/amigo/term/GO:1900112	ATRX
0.187748	1	14	16.849	GO:1901201 regulation of extracellular matrix assembly	http://amigo.geneontology.org/amigo/term/GO:1901201	TIE1
0.187748	2	91	5.18432	GO:1901379 regulation of potassium ion transmembrane transport	http://amigo.geneontology.org/amigo/term/GO:1901379	ABCC9 OXSR1
0.187748	1	14	16.849	GO:1902969 mitotic DNA replication	http://amigo.geneontology.org/amigo/term/GO:1902969	BRCA2
0.187748	4	341	2.767	GO:2001020 regulation of response to DNA damage stimulus	http://amigo.geneontology.org/amigo/term/GO:2001020	EYA1 BRCA2 SGF29 WDR48
0.187913	3	207	3.41865	GO:0006575 cellular modified amino acid metabolic process	http://amigo.geneontology.org/amigo/term/GO:0006575	GGT1 SARDH CPT2
0.187913	5	491	2.4021	GO:0007389 pattern specification process	http://amigo.geneontology.org/amigo/term/GO:0007389	TLL1 EYA1 TTC8 FGFR2 ROBO2
0.187913	3	207	3.41865	GO:0043123 positive regulation of I-kappaB kinase/NF-kappaB signaling	http://amigo.geneontology.org/amigo/term/GO:0043123	RIPK2 IRAK4 RIPK1
0.18797	2	92	5.12797	GO:0000422 autophagy of mitochondrion	http://amigo.geneontology.org/amigo/term/GO:0000422	ULK2 ATG4B
0.18797	2	92	5.12797	GO:0061726 mitochondrion disassembly	http://amigo.geneontology.org/amigo/term/GO:0061726	ULK2 ATG4B
0.18797	2	92	5.12797	GO:0072332 intrinsic apoptotic signaling pathway by p53 class mediator	http://amigo.geneontology.org/amigo/term/GO:0072332	MSH2 BRCA2
0.189231	3	208	3.40221	GO:0043393 regulation of protein binding	http://amigo.geneontology.org/amigo/term/GO:0043393	LRRK2 HDAC4 RIPK2
0.189313	11	1529	1.69703	GO:0080134 regulation of response to stress	http://amigo.geneontology.org/amigo/term/GO:0080134	GGT1 EYA1 BRCA2 SGF29 WDR48 RIPK1 RIPK2 PTPRS ZNFX1 LRRK2 UBXN1
0.190333	12	1718	1.64764	GO:0044093 positive regulation of molecular function	http://amigo.geneontology.org/amigo/term/GO:0044093	TIE1 FGFR2 RYK LRRK2 MSH2 RIPK2 DAPK1 CSK RIPK1 CLPX HDAC4 NET1
0.190333	3	209	3.38593	GO:0050731 positive regulation of peptidyl-tyrosine phosphorylation	http://amigo.geneontology.org/amigo/term/GO:0050731	RIPK2 CNTN1 LRRK1
0.190333	3	209	3.38593	GO:0071706 tumor necrosis factor superfamily cytokine production	http://amigo.geneontology.org/amigo/term/GO:0071706	RIPK1 RIPK2 LRRK2
0.190333	3	209	3.38593	GO:1903555 regulation of tumor necrosis factor superfamily cytokine production	http://amigo.geneontology.org/amigo/term/GO:1903555	RIPK1 RIPK2 LRRK2
0.191085	4	346	2.72701	GO:0071214 cellular response to abiotic stimulus	http://amigo.geneontology.org/amigo/term/GO:0071214	NET1 HDAC4 OXSR1 BRCA2
0.191085	4	346	2.72701	GO:0104004 cellular response to environmental stimulus	http://amigo.geneontology.org/amigo/term/GO:0104004	NET1 HDAC4 OXSR1 BRCA2
0.191396	7	827	1.99662	GO:0000165 MAPK cascade	http://amigo.geneontology.org/amigo/term/GO:0000165	LRRK2 RIPK1 RYK CSK RIPK2 IRAK4 FGFR2
0.191396	1	15	15.7258	GO:0006206 pyrimidine nucleobase metabolic process	http://amigo.geneontology.org/amigo/term/GO:0006206	DPYS
0.191396	1	15	15.7258	GO:0006750 glutathione biosynthetic process	http://amigo.geneontology.org/amigo/term/GO:0006750	GGT1
0.191396	1	15	15.7258	GO:0009158 ribonucleoside monophosphate catabolic process	http://amigo.geneontology.org/amigo/term/GO:0009158	DPYS
0.191396	1	15	15.7258	GO:0009173 pyrimidine ribonucleoside monophosphate metabolic process	http://amigo.geneontology.org/amigo/term/GO:0009173	DPYS
0.191396	1	15	15.7258	GO:0010501 RNA secondary structure unwinding	http://amigo.geneontology.org/amigo/term/GO:0010501	AGO3
0.191396	1	15	15.7258	GO:0010940 positive regulation of necrotic cell death	http://amigo.geneontology.org/amigo/term/GO:0010940	RIPK1
0.191396	1	15	15.7258	GO:0010988 regulation of low-density lipoprotein particle clearance	http://amigo.geneontology.org/amigo/term/GO:0010988	CSK
0.191396	1	15	15.7258	GO:0014874 response to stimulus involved in regulation of muscle adaptation	http://amigo.geneontology.org/amigo/term/GO:0014874	HDAC4
0.191396	1	15	15.7258	GO:0016322 neuron remodeling	http://amigo.geneontology.org/amigo/term/GO:0016322	FARP2
0.191396	4	347	2.71915	GO:0018209 peptidyl-serine modification	http://amigo.geneontology.org/amigo/term/GO:0018209	ULK2 RIPK2 RIPK1 LRRK2
0.191396	1	15	15.7258	GO:0021859 pyramidal neuron differentiation	http://amigo.geneontology.org/amigo/term/GO:0021859	FGFR2
0.191396	1	15	15.7258	GO:0031054 pre-miRNA processing	http://amigo.geneontology.org/amigo/term/GO:0031054	AGO3
0.191396	2	94	5.01886	GO:0032092 positive regulation of protein binding	http://amigo.geneontology.org/amigo/term/GO:0032092	LRRK2 RIPK2
0.191396	13	1916	1.60048	GO:0042592 homeostatic process	http://amigo.geneontology.org/amigo/term/GO:0042592	ABHD8 TRPA1 NPC1 USH2A JMJD6 CSK WDR48 LRRK1 GRIA1 CPT2 CSMD1 LRRK2 MTCH2
0.191396	7	826	1.99904	GO:0043549 regulation of kinase activity	http://amigo.geneontology.org/amigo/term/GO:0043549	TIE1 FGFR2 RYK LRRK2 MVP CSK IPO7
0.191396	2	94	5.01886	GO:0046849 bone remodeling	http://amigo.geneontology.org/amigo/term/GO:0046849	CSK LRRK1
0.191396	1	15	15.7258	GO:0048291 isotype switching to IgG isotypes	http://amigo.geneontology.org/amigo/term/GO:0048291	MSH2
0.191396	2	95	4.96603	GO:0048704 embryonic skeletal system morphogenesis	http://amigo.geneontology.org/amigo/term/GO:0048704	EYA1 FGFR2
0.191396	1	15	15.7258	GO:0051095 regulation of helicase activity	http://amigo.geneontology.org/amigo/term/GO:0051095	MSH2
0.191396	1	15	15.7258	GO:0060009 Sertoli cell development	http://amigo.geneontology.org/amigo/term/GO:0060009	ATRX
0.191396	1	15	15.7258	GO:0060628 regulation of ER to Golgi vesicle-mediated transport	http://amigo.geneontology.org/amigo/term/GO:0060628	LRRK2
0.191396	1	15	15.7258	GO:0070571 negative regulation of neuron projection regeneration	http://amigo.geneontology.org/amigo/term/GO:0070571	PTPRS
0.191396	8	994	1.89848	GO:0070925 organelle assembly	http://amigo.geneontology.org/amigo/term/GO:0070925	ULK2 MDN1 CENPJ TTC8 LRRK2 FARP2 PTPRS ATG4B
0.191396	2	94	5.01886	GO:0099175 regulation of postsynapse organization	http://amigo.geneontology.org/amigo/term/GO:0099175	LRRK2 PTPRS
0.191396	9	1172	1.81142	GO:1901698 response to nitrogen compound	http://amigo.geneontology.org/amigo/term/GO:1901698	LRRK2 RIPK2 ATRX CSK NPC1 GRIA1 FBP1 ABCC9 UBXN1
0.191396	1	15	15.7258	GO:1904889 regulation of excitatory synapse assembly	http://amigo.geneontology.org/amigo/term/GO:1904889	PTPRS
0.191396	1	15	15.7258	GO:2000104 negative regulation of DNA-templated DNA replication	http://amigo.geneontology.org/amigo/term/GO:2000104	BRCA2
0.191396	1	15	15.7258	GO:2000105 positive regulation of DNA-templated DNA replication	http://amigo.geneontology.org/amigo/term/GO:2000105	ATRX
0.191524	28	4987	1.32441	GO:0051234 establishment of localization	http://amigo.geneontology.org/amigo/term/GO:0051234	ABCC9 JMJD6 OXA1L XPOT LRRK2 MT-CO1 IPO7 MRC1 CSK BRCA2 NPC1 MVP CNTN1 USH2A CD209 ATG4A TRPA1 FRAS1 GRIA1 TTC8 ATG4B OXSR1 MX2 DAPK1 RIPK1 CENPJ CPT2 SGF29
0.193275	15	2312	1.53041	GO:1901575 organic substance catabolic process	http://amigo.geneontology.org/amigo/term/GO:1901575	GGT1 PSMD7 SARDH DPYS CPT2 WDR26 CLPX AGO3 RIPK1 UBXN1 FBP1 HDAC4 LRRK2 TTC5 TMTC3
0.193276	3	214	3.30682	GO:0009060 aerobic respiration	http://amigo.geneontology.org/amigo/term/GO:0009060	MT-CO1 MSH2 OXA1L
0.193276	3	214	3.30682	GO:0042770 signal transduction in response to DNA damage	http://amigo.geneontology.org/amigo/term/GO:0042770	BRCA2 ATRX MSH2
0.193276	2	96	4.9143	GO:0060996 dendritic spine development	http://amigo.geneontology.org/amigo/term/GO:0060996	LRRK2 PTPRS
0.193276	3	214	3.30682	GO:2000113 negative regulation of cellular macromolecule biosynthetic process	http://amigo.geneontology.org/amigo/term/GO:2000113	AGO3 DAPK3 DAPK1
0.19405	1	16	14.7429	GO:0000212 meiotic spindle organization	http://amigo.geneontology.org/amigo/term/GO:0000212	ATRX
0.19405	2	97	4.86364	GO:0001738 morphogenesis of a polarized epithelium	http://amigo.geneontology.org/amigo/term/GO:0001738	RYK TTC8
0.19405	3	218	3.24615	GO:0002221 pattern recognition receptor signaling pathway	http://amigo.geneontology.org/amigo/term/GO:0002221	RIPK2 PTPRS IRAK4
0.19405	1	16	14.7429	GO:0003334 keratinocyte development	http://amigo.geneontology.org/amigo/term/GO:0003334	FLNB
0.19405	3	216	3.2762	GO:0006403 RNA localization	http://amigo.geneontology.org/amigo/term/GO:0006403	XPOT MVP MX2
0.19405	4	354	2.66539	GO:0006913 nucleocytoplasmic transport	http://amigo.geneontology.org/amigo/term/GO:0006913	XPOT IPO7 LRRK2 MX2
0.19405	4	354	2.66539	GO:0006936 muscle contraction	http://amigo.geneontology.org/amigo/term/GO:0006936	HDAC4 ABCC9 MYOF DAPK3
0.19405	13	1937	1.58313	GO:0007049 cell cycle	http://amigo.geneontology.org/amigo/term/GO:0007049	CENPJ BRCA2 NAT10 ATRX MSH2 MCM8 HMCN1 PLRG1 SGF29 DAPK3 MX2 FGFR2 IPO7
0.19405	2	97	4.86364	GO:0008593 regulation of Notch signaling pathway	http://amigo.geneontology.org/amigo/term/GO:0008593	CNTN6 ROBO2
0.19405	3	215	3.29144	GO:0009612 response to mechanical stimulus	http://amigo.geneontology.org/amigo/term/GO:0009612	HDAC4 TRPA1 PTPRQ
0.19405	3	215	3.29144	GO:0010952 positive regulation of peptidase activity	http://amigo.geneontology.org/amigo/term/GO:0010952	RIPK2 DAPK1 CLPX
0.19405	2	97	4.86364	GO:0014812 muscle cell migration	http://amigo.geneontology.org/amigo/term/GO:0014812	HDAC4 NET1
0.19405	2	98	4.81401	GO:0022404 molting cycle process	http://amigo.geneontology.org/amigo/term/GO:0022404	FARP2 FGFR2
0.19405	2	98	4.81401	GO:0022405 hair cycle process	http://amigo.geneontology.org/amigo/term/GO:0022405	FARP2 FGFR2
0.19405	4	355	2.65788	GO:0030198 extracellular matrix organization	http://amigo.geneontology.org/amigo/term/GO:0030198	TIE1 PTPRQ HMCN1 TLL1
0.19405	1	16	14.7429	GO:0032239 regulation of nucleobase-containing compound transport	http://amigo.geneontology.org/amigo/term/GO:0032239	RIPK1
0.19405	3	215	3.29144	GO:0033002 muscle cell proliferation	http://amigo.geneontology.org/amigo/term/GO:0033002	FGFR2 HDAC4 IRAK4
0.19405	3	216	3.2762	GO:0034249 negative regulation of cellular amide metabolic process	http://amigo.geneontology.org/amigo/term/GO:0034249	AGO3 DAPK3 DAPK1
0.19405	2	98	4.81401	GO:0035195 miRNA-mediated gene silencing	http://amigo.geneontology.org/amigo/term/GO:0035195	AGO3 RIPK1
0.19405	1	16	14.7429	GO:0035278 miRNA-mediated gene silencing by inhibition of translation	http://amigo.geneontology.org/amigo/term/GO:0035278	AGO3
0.19405	1	16	14.7429	GO:0035641 locomotory exploration behavior	http://amigo.geneontology.org/amigo/term/GO:0035641	LRRK2
0.19405	4	357	2.64299	GO:0043010 camera-type eye development	http://amigo.geneontology.org/amigo/term/GO:0043010	SDK2 JMJD6 TTC8 DSCAM
0.19405	4	356	2.65041	GO:0043062 extracellular structure organization	http://amigo.geneontology.org/amigo/term/GO:0043062	TIE1 PTPRQ HMCN1 TLL1
0.19405	1	16	14.7429	GO:0044406 adhesion of symbiont to host	http://amigo.geneontology.org/amigo/term/GO:0044406	CD209
0.19405	2	97	4.86364	GO:0046031 ADP metabolic process	http://amigo.geneontology.org/amigo/term/GO:0046031	FBP1 HDAC4
0.19405	1	16	14.7429	GO:0048840 otolith development	http://amigo.geneontology.org/amigo/term/GO:0048840	ATG4B
0.19405	3	218	3.24615	GO:0050679 positive regulation of epithelial cell proliferation	http://amigo.geneontology.org/amigo/term/GO:0050679	EYA1 WDR48 FGFR2
0.19405	5	507	2.3263	GO:0050867 positive regulation of cell activation	http://amigo.geneontology.org/amigo/term/GO:0050867	CD209 MSH2 RIPK2 LRRK2 CSK
0.19405	4	354	2.66539	GO:0051169 nuclear transport	http://amigo.geneontology.org/amigo/term/GO:0051169	XPOT IPO7 LRRK2 MX2
0.19405	1	16	14.7429	GO:0060546 negative regulation of necroptotic process	http://amigo.geneontology.org/amigo/term/GO:0060546	RIPK1
0.19405	1	16	14.7429	GO:0060572 morphogenesis of an epithelial bud	http://amigo.geneontology.org/amigo/term/GO:0060572	FGFR2
0.19405	1	16	14.7429	GO:0061709 reticulophagy	http://amigo.geneontology.org/amigo/term/GO:0061709	ULK2
0.19405	2	98	4.81401	GO:0062014 negative regulation of small molecule metabolic process	http://amigo.geneontology.org/amigo/term/GO:0062014	FBP1 HDAC4
0.19405	1	16	14.7429	GO:0072160 nephron tubule epithelial cell differentiation	http://amigo.geneontology.org/amigo/term/GO:0072160	FAT4
0.19405	1	16	14.7429	GO:0097527 necroptotic signaling pathway	http://amigo.geneontology.org/amigo/term/GO:0097527	RIPK1
0.19405	2	98	4.81401	GO:1900407 regulation of cellular response to oxidative stress	http://amigo.geneontology.org/amigo/term/GO:1900407	RIPK1 LRRK2
0.19405	2	98	4.81401	GO:1901992 positive regulation of mitotic cell cycle phase transition	http://amigo.geneontology.org/amigo/term/GO:1901992	CENPJ PLRG1
0.19405	1	16	14.7429	GO:1904953 Wnt signaling pathway involved in midbrain dopaminergic neuron differentiation	http://amigo.geneontology.org/amigo/term/GO:1904953	RYK
0.19405	2	98	4.81401	GO:1905897 regulation of response to endoplasmic reticulum stress	http://amigo.geneontology.org/amigo/term/GO:1905897	UBXN1 LRRK2
0.195038	3	219	3.23132	GO:0006282 regulation of DNA repair	http://amigo.geneontology.org/amigo/term/GO:0006282	EYA1 SGF29 WDR48
0.195038	2	99	4.76539	GO:0006400 tRNA modification	http://amigo.geneontology.org/amigo/term/GO:0006400	ELP4 NAT10
0.195038	3	219	3.23132	GO:0052126 movement in host environment	http://amigo.geneontology.org/amigo/term/GO:0052126	CD209 NPC1 MRC1
0.195038	2	99	4.76539	GO:0060840 artery development	http://amigo.geneontology.org/amigo/term/GO:0060840	EYA1 ROBO2
0.195136	4	359	2.62826	GO:0044403 biological process involved in symbiotic interaction	http://amigo.geneontology.org/amigo/term/GO:0044403	CD209 NPC1 MRC1 PI4KA
0.195136	4	359	2.62826	GO:0045229 external encapsulating structure organization	http://amigo.geneontology.org/amigo/term/GO:0045229	TIE1 PTPRQ HMCN1 TLL1
0.19533	12	1752	1.61566	GO:1901700 response to oxygen-containing compound	http://amigo.geneontology.org/amigo/term/GO:1901700	LRRK2 RIPK2 TRPA1 NET1 TIE1 FGFR2 CSK RIPK1 FBP1 MRC1 ABCC9 DAPK1
0.196334	3	220	3.21664	GO:0007033 vacuole organization	http://amigo.geneontology.org/amigo/term/GO:0007033	ULK2 LRRK2 ATG4B
0.197791	5	514	2.29462	GO:0034248 regulation of cellular amide metabolic process	http://amigo.geneontology.org/amigo/term/GO:0034248	ELP4 AGO3 NAT10 DAPK3 DAPK1
0.197844	1	17	13.8757	GO:0000097 sulfur amino acid biosynthetic process	http://amigo.geneontology.org/amigo/term/GO:0000097	GGT1
0.197844	1	17	13.8757	GO:0001946 lymphangiogenesis	http://amigo.geneontology.org/amigo/term/GO:0001946	TIE1
0.197844	1	17	13.8757	GO:0003129 heart induction	http://amigo.geneontology.org/amigo/term/GO:0003129	ROBO2
0.197844	1	17	13.8757	GO:0003356 regulation of cilium beat frequency	http://amigo.geneontology.org/amigo/term/GO:0003356	TTLL6
0.197844	1	17	13.8757	GO:0006577 amino-acid betaine metabolic process	http://amigo.geneontology.org/amigo/term/GO:0006577	CPT2
0.197844	1	17	13.8757	GO:0010224 response to UV-B	http://amigo.geneontology.org/amigo/term/GO:0010224	MSH2
0.197844	1	17	13.8757	GO:0010820 positive regulation of T cell chemotaxis	http://amigo.geneontology.org/amigo/term/GO:0010820	OXSR1
0.197844	1	17	13.8757	GO:0019184 nonribosomal peptide biosynthetic process	http://amigo.geneontology.org/amigo/term/GO:0019184	GGT1
0.197844	2	102	4.62523	GO:0030901 midbrain development	http://amigo.geneontology.org/amigo/term/GO:0030901	RYK FGFR2
0.197844	1	17	13.8757	GO:0033194 response to hydroperoxide	http://amigo.geneontology.org/amigo/term/GO:0033194	DAPK1
0.197844	1	17	13.8757	GO:0033599 regulation of mammary gland epithelial cell proliferation	http://amigo.geneontology.org/amigo/term/GO:0033599	BRCA2
0.197844	1	17	13.8757	GO:0033623 regulation of integrin activation	http://amigo.geneontology.org/amigo/term/GO:0033623	FARP2
0.197844	1	17	13.8757	GO:0034134 toll-like receptor 2 signaling pathway	http://amigo.geneontology.org/amigo/term/GO:0034134	RIPK2
0.197844	1	17	13.8757	GO:0035269 protein O-linked mannosylation	http://amigo.geneontology.org/amigo/term/GO:0035269	TMTC3
0.197844	1	17	13.8757	GO:0044804 autophagy of nucleus	http://amigo.geneontology.org/amigo/term/GO:0044804	ULK2
0.197844	1	17	13.8757	GO:0045198 establishment of epithelial cell apical/basal polarity	http://amigo.geneontology.org/amigo/term/GO:0045198	TTC8
0.197844	1	17	13.8757	GO:0045651 positive regulation of macrophage differentiation	http://amigo.geneontology.org/amigo/term/GO:0045651	RIPK1
0.197844	1	17	13.8757	GO:0045779 negative regulation of bone resorption	http://amigo.geneontology.org/amigo/term/GO:0045779	CSK
0.197844	1	17	13.8757	GO:0048311 mitochondrion distribution	http://amigo.geneontology.org/amigo/term/GO:0048311	LRRK2
0.197844	1	17	13.8757	GO:0048557 embryonic digestive tract morphogenesis	http://amigo.geneontology.org/amigo/term/GO:0048557	FGFR2
0.197844	1	17	13.8757	GO:0050910 detection of mechanical stimulus involved in sensory perception of sound	http://amigo.geneontology.org/amigo/term/GO:0050910	PTPRQ
0.197844	1	17	13.8757	GO:0051770 positive regulation of nitric-oxide synthase biosynthetic process	http://amigo.geneontology.org/amigo/term/GO:0051770	LRRK2
0.197844	3	223	3.17336	GO:0061136 regulation of proteasomal protein catabolic process	http://amigo.geneontology.org/amigo/term/GO:0061136	UBXN1 LRRK2 TMTC3
0.197844	1	17	13.8757	GO:0062099 negative regulation of programmed necrotic cell death	http://amigo.geneontology.org/amigo/term/GO:0062099	RIPK1
0.197844	1	17	13.8757	GO:0070200 establishment of protein localization to telomere	http://amigo.geneontology.org/amigo/term/GO:0070200	BRCA2
0.197844	2	101	4.67102	GO:0072080 nephron tubule development	http://amigo.geneontology.org/amigo/term/GO:0072080	EYA1 FAT4
0.197844	1	17	13.8757	GO:1901032 negative regulation of response to reactive oxygen species	http://amigo.geneontology.org/amigo/term/GO:1901032	LRRK2
0.197844	3	221	3.20208	GO:1901888 regulation of cell junction assembly	http://amigo.geneontology.org/amigo/term/GO:1901888	DAPK3 PTPRS ROBO2
0.197844	1	17	13.8757	GO:1902902 negative regulation of autophagosome assembly	http://amigo.geneontology.org/amigo/term/GO:1902902	LRRK2
0.197844	1	17	13.8757	GO:1903206 negative regulation of hydrogen peroxide-induced cell death	http://amigo.geneontology.org/amigo/term/GO:1903206	LRRK2

## Sheet: B.Chondrosia_reniformis
Enrichment FDR	nGenes	Pathway Genes	Fold Enrichment	Pathway	URL	Genes
0.000974243	33	3932	2.31365	GO:0006464 cellular protein modification process	http://amigo.geneontology.org/amigo/term/GO:0006464	CDK13 NEDD4 ITCH TRAF5 PCGF1 LOXL3 NAA50 UBA1 PPT1 TRAF3 CUL4A PTPRF PIGM KDM6A PTPRD CUL4B MGAT2 MOB1B TRAF6 PTPRT KDM4A ABL1 KDM4C NEK11 RIOK2 PTPRQ FEM1A TBCK ROR1 HIF1A CENPE COG7
0.000974243	33	3952	2.30194	GO:0036211 protein modification process	http://amigo.geneontology.org/amigo/term/GO:0036211	CDK13 NEDD4 ITCH TRAF5 PCGF1 LOXL3 NAA50 UBA1 PPT1 TRAF3 CUL4A PTPRF PIGM KDM6A PTPRD CUL4B MGAT2 MOB1B TRAF6 PTPRT KDM4A ABL1 KDM4C NEK11 RIOK2 PTPRQ FEM1A TBCK ROR1 HIF1A CENPE COG7
0.000974243	35	4206	2.29401	GO:0043412 macromolecule modification	http://amigo.geneontology.org/amigo/term/GO:0043412	NSUN2 CDK13 NEDD4 ITCH TRAF5 PCGF1 LOXL3 NAA50 UBA1 PPT1 TRAF3 CUL4A PTPRF PIGM KDM6A PTPRD CUL4B MGAT2 MOB1B TRAF6 PTPRT KDM4A ABL1 KDM4C NEK11 RIOK2 PTPRQ FEM1A TBCK ROR1 HIF1A CENPE COG7 MBD4
0.00112049	23	2160	2.93543	GO:0033554 cellular response to stress	http://amigo.geneontology.org/amigo/term/GO:0033554	TRAF5 HIF1A NEK11 UBA1 TRAF3 CUL4A CUL4B TRAF6 TPR EXD2 ABL1 SCAP MTREX SMC1A ITCH VNN1 MBD4 PIF1 PTPRF FEN1 HAUS7 NEDD4 UBXN4
0.00253054	34	4424	2.11866	GO:0006950 response to stress	http://amigo.geneontology.org/amigo/term/GO:0006950	TRAF5 NLRC4 HIF1A NEK11 LOXL3 UBA1 TRAF3 CUL4A FEM1A CUL4B TRAF6 DMBT1 TPR EXD2 ABL1 SCAP ADA MTREX KDM4A SMC1A ITCH VNN1 ZNFX1 MBD4 PIF1 PTPRF UBXN4 AIMP1 FEN1 RAB43 MT-CO1 HAUS7 VPS35 NEDD4
0.00277752	5	71	19.4137	GO:0070534 protein K63-linked ubiquitination	http://amigo.geneontology.org/amigo/term/GO:0070534	ITCH TRAF5 TRAF3 TRAF6 NEDD4
0.00487055	14	992	3.89057	GO:0006974 cellular response to DNA damage stimulus	http://amigo.geneontology.org/amigo/term/GO:0006974	NEK11 UBA1 CUL4A CUL4B EXD2 ABL1 MTREX SMC1A MBD4 PIF1 FEN1 TRAF6 HAUS7 NEDD4
0.00504385	5	85	16.2162	GO:2000736 regulation of stem cell differentiation	http://amigo.geneontology.org/amigo/term/GO:2000736	NSUN2 CDK13 KDM4C ITCH ABL1
0.0076682	8	327	6.74434	GO:0042254 ribosome biogenesis	http://amigo.geneontology.org/amigo/term/GO:0042254	MTREX RIOK2 RRP15 WDR75 NOM1 BOP1 CUL4A CUL4B
0.0188353	13	1011	3.54478	GO:0032446 protein modification by small protein conjugation	http://amigo.geneontology.org/amigo/term/GO:0032446	NEDD4 ITCH TRAF5 PCGF1 UBA1 TRAF3 CUL4A CUL4B TRAF6 ABL1 FEM1A HIF1A
0.0196065	2	4	137.837	GO:0001922 B-1 B cell homeostasis	http://amigo.geneontology.org/amigo/term/GO:0001922	ABL1 HIF1A
0.0231819	21	2402	2.41015	GO:0044248 cellular catabolic process	http://amigo.geneontology.org/amigo/term/GO:0044248	MTREX NEDD4 ITCH UBA1 SNX14 CUL4A FEM1A CUL4B RAB43 ADA HIF1A FEN1 NSUN2 VPS35 TRAF5 ABL1 PPT1 VPS16 KDM4A UBXN4 MBD4
0.0245189	25	3210	2.147	GO:0009966 regulation of signal transduction	http://amigo.geneontology.org/amigo/term/GO:0009966	TRAF5 TRAF3 PDE3A TRAF6 ROR1 ADA HIF1A HIP1 CDK13 VPS35 PTPRT NEO1 ITCH ABL1 VNN1 LOXL3 RGS3 CUL4A PTPRD NPNT TPR NEDD4 TBCK BOP1 KDM4C
0.0245189	12	937	3.53052	GO:0016567 protein ubiquitination	http://amigo.geneontology.org/amigo/term/GO:0016567	NEDD4 ITCH TRAF5 PCGF1 UBA1 TRAF3 CUL4A CUL4B TRAF6 ABL1 FEM1A
0.0245189	27	3630	2.05047	GO:0044085 cellular component biogenesis	http://amigo.geneontology.org/amigo/term/GO:0044085	MTREX TPR RIOK2 RRP15 WDR75 ZNFX1 HIP1 NOM1 RAB43 HAUS7 BOP1 AP1B1 MED23 VPS16 CENPE PTPRD VPS35 ABL1 CUL4A CUL4B COX15 SOAT1 SMC1A SACS DGAT1 FSIP2 NLRC4
0.0245189	3	28	29.5366	GO:0070076 histone lysine demethylation	http://amigo.geneontology.org/amigo/term/GO:0070076	KDM6A KDM4A KDM4C
0.0256721	3	29	28.5181	GO:0016577 histone demethylation	http://amigo.geneontology.org/amigo/term/GO:0016577	KDM6A KDM4A KDM4C
0.030708	6	238	6.94978	GO:0000819 sister chromatid segregation	http://amigo.geneontology.org/amigo/term/GO:0000819	SMC1A NAA50 CENPE TPR RIOK2 FEN1
0.030708	3	33	25.0613	GO:0001782 B cell homeostasis	http://amigo.geneontology.org/amigo/term/GO:0001782	ABL1 HIF1A ADA
0.030708	3	32	25.8445	GO:0006482 protein demethylation	http://amigo.geneontology.org/amigo/term/GO:0006482	KDM6A KDM4A KDM4C
0.030708	3	32	25.8445	GO:0008214 protein dealkylation	http://amigo.geneontology.org/amigo/term/GO:0008214	KDM6A KDM4A KDM4C
0.0308754	29	4206	1.90075	GO:0006996 organelle organization	http://amigo.geneontology.org/amigo/term/GO:0006996	TPR KDM4A SMC1A KDM4C NAA50 ZNFX1 HIP1 PIF1 FMNL2 FMNL3 COG7 RAB43 HAUS7 VPS16 AP1B1 ABL1 CENPE VPS35 HIF1A PPT1 KDM6A PTPRD PDE3A RIOK2 TBCK FEN1 FSIP2 BOP1 SCAP
0.0308754	2	7	78.7642	GO:0007185 transmembrane receptor protein tyrosine phosphatase signaling pathway	http://amigo.geneontology.org/amigo/term/GO:0007185	PTPRF PTPRD
0.0308754	26	3602	1.98988	GO:0010646 regulation of cell communication	http://amigo.geneontology.org/amigo/term/GO:0010646	TRAF5 TRAF3 PDE3A TRAF6 ROR1 ADA HIF1A HIP1 CDK13 VPS35 PTPRT NEO1 ITCH ABL1 VNN1 LOXL3 RGS3 CUL4A PTPRD NPNT TPR NEDD4 TBCK BOP1 AIMP1 KDM4C
0.0308754	26	3615	1.98272	GO:0023051 regulation of signaling	http://amigo.geneontology.org/amigo/term/GO:0023051	TRAF5 TRAF3 PDE3A TRAF6 ROR1 ADA HIF1A HIP1 CDK13 VPS35 PTPRT NEO1 ITCH ABL1 VNN1 LOXL3 RGS3 CUL4A PTPRD NPNT TPR NEDD4 TBCK BOP1 AIMP1 KDM4C
0.0308754	13	1166	3.07356	GO:0070647 protein modification by small protein conjugation or removal	http://amigo.geneontology.org/amigo/term/GO:0070647	NEDD4 ITCH TRAF5 PCGF1 UBA1 TRAF3 CUL4A CUL4B TRAF6 ABL1 FEM1A HIF1A
0.0308754	17	1857	2.52368	GO:1902531 regulation of intracellular signal transduction	http://amigo.geneontology.org/amigo/term/GO:1902531	TRAF5 TRAF3 PDE3A TRAF6 ROR1 HIP1 HIF1A ITCH ABL1 VNN1 CUL4A NPNT ADA TPR NEDD4 TBCK BOP1
0.0308754	2	7	78.7642	GO:2000197 regulation of ribonucleoprotein complex localization	http://amigo.geneontology.org/amigo/term/GO:2000197	NSUN2 RIOK2
0.0332335	6	257	6.43599	GO:0048863 stem cell differentiation	http://amigo.geneontology.org/amigo/term/GO:0048863	NSUN2 CDK13 HIF1A KDM4C ITCH ABL1
0.0332335	2	8	68.9187	GO:1900113 negative regulation of histone H3-K9 trimethylation	http://amigo.geneontology.org/amigo/term/GO:1900113	KDM4A KDM4C
0.0343023	3	39	21.2057	GO:0000460 maturation of 5.8S rRNA	http://amigo.geneontology.org/amigo/term/GO:0000460	MTREX RRP15 BOP1
0.0363303	29	4338	1.84292	GO:0048583 regulation of response to stimulus	http://amigo.geneontology.org/amigo/term/GO:0048583	TRAF5 TRAF3 FEM1A PDE3A TRAF6 ROR1 ADA NLRC4 HIF1A HIP1 CDK13 VPS35 ABL1 PTPRT NEO1 ITCH VNN1 LOXL3 ZNFX1 RGS3 CUL4A PTPRF PTPRD NPNT TPR NEDD4 TBCK BOP1 KDM4C
0.0363303	4	97	11.368	GO:0048708 astrocyte differentiation	http://amigo.geneontology.org/amigo/term/GO:0048708	KDM4A ABL1 CUL4B ROR1
0.0365384	21	2680	2.16014	GO:0050793 regulation of developmental process	http://amigo.geneontology.org/amigo/term/GO:0050793	NEDD4 FMNL2 FMNL3 PDE3A HIF1A TRAF6 NSUN2 CDK13 KDM4A ABL1 KDM4C VNN1 LOXL3 CUL4A PTPRF PTPRD NPNT ROR1 ADA VPS35 ITCH
0.0365384	2	9	61.261	GO:0071166 ribonucleoprotein complex localization	http://amigo.geneontology.org/amigo/term/GO:0071166	NSUN2 RIOK2
0.0367819	9	649	3.82292	GO:0006281 DNA repair	http://amigo.geneontology.org/amigo/term/GO:0006281	EXD2 CUL4B SMC1A ABL1 MBD4 CUL4A PIF1 FEN1 HAUS7
0.0367819	17	1937	2.41945	GO:0007049 cell cycle	http://amigo.geneontology.org/amigo/term/GO:0007049	TPR SMC1A NEK11 NAA50 DCTN3 CENPE HAUS7 NSUN2 RIOK2 CDK13 ABL1 CUL4A CUL4B PDE3A LMLN FEN1 BOP1
0.0367819	7	395	4.88537	GO:0007059 chromosome segregation	http://amigo.geneontology.org/amigo/term/GO:0007059	SMC1A NEK11 NAA50 CENPE TPR RIOK2 FEN1
0.0367819	4	100	11.027	GO:0014020 primary neural tube formation	http://amigo.geneontology.org/amigo/term/GO:0014020	ABL1 HIF1A KDM6A TRAF6
0.0367819	8	509	4.3328	GO:0022613 ribonucleoprotein complex biogenesis	http://amigo.geneontology.org/amigo/term/GO:0022613	MTREX RIOK2 RRP15 WDR75 NOM1 BOP1 CUL4A CUL4B
0.0367819	13	1263	2.83751	GO:0044265 cellular macromolecule catabolic process	http://amigo.geneontology.org/amigo/term/GO:0044265	MTREX NEDD4 ITCH UBA1 CUL4A FEM1A CUL4B FEN1 NSUN2 VPS35 TRAF5 PPT1 UBXN4
0.0367819	2	10	55.1349	GO:0070244 negative regulation of thymocyte apoptotic process	http://amigo.geneontology.org/amigo/term/GO:0070244	HIF1A ADA
0.0367819	2	10	55.1349	GO:0070544 histone H3-K36 demethylation	http://amigo.geneontology.org/amigo/term/GO:0070544	KDM4A KDM4C
0.0367819	2	10	55.1349	GO:0097400 interleukin-17-mediated signaling pathway	http://amigo.geneontology.org/amigo/term/GO:0097400	TRAF5 TRAF6
0.0367819	2	10	55.1349	GO:2000234 positive regulation of rRNA processing	http://amigo.geneontology.org/amigo/term/GO:2000234	WDR75 RIOK2
0.0391134	4	108	10.2102	GO:0001841 neural tube formation	http://amigo.geneontology.org/amigo/term/GO:0001841	ABL1 HIF1A KDM6A TRAF6
0.0405124	2	11	50.1227	GO:0033089 positive regulation of T cell differentiation in thymus	http://amigo.geneontology.org/amigo/term/GO:0033089	VNN1 ADA
0.0405124	2	11	50.1227	GO:0034379 very-low-density lipoprotein particle assembly	http://amigo.geneontology.org/amigo/term/GO:0034379	SOAT1 DGAT1
0.041766	7	411	4.69519	GO:0001701 in utero embryonic development	http://amigo.geneontology.org/amigo/term/GO:0001701	NSUN2 HIF1A KDM4C CUL4A KDM6A TRAF6 ADA
0.042086	15	1645	2.51375	GO:0009967 positive regulation of signal transduction	http://amigo.geneontology.org/amigo/term/GO:0009967	TRAF5 TRAF3 TRAF6 ROR1 HIF1A HIP1 VPS35 NEO1 ABL1 VNN1 LOXL3 NPNT ADA TPR NEDD4
0.042086	4	113	9.7584	GO:0046822 regulation of nucleocytoplasmic transport	http://amigo.geneontology.org/amigo/term/GO:0046822	NSUN2 TPR NEDD4 RIOK2
0.0424254	16	1830	2.41027	GO:0010647 positive regulation of cell communication	http://amigo.geneontology.org/amigo/term/GO:0010647	TRAF5 TRAF3 TRAF6 ROR1 HIF1A HIP1 VPS35 NEO1 ABL1 VNN1 LOXL3 NPNT ADA TPR NEDD4 AIMP1
0.0431142	16	1836	2.40239	GO:0023056 positive regulation of signaling	http://amigo.geneontology.org/amigo/term/GO:0023056	TRAF5 TRAF3 TRAF6 ROR1 HIF1A HIP1 VPS35 NEO1 ABL1 VNN1 LOXL3 NPNT ADA TPR NEDD4 AIMP1
0.0431929	21	2805	2.06387	GO:0009056 catabolic process	http://amigo.geneontology.org/amigo/term/GO:0009056	MTREX NEDD4 ITCH UBA1 PPT1 SNX14 CUL4A FEM1A CUL4B RAB43 ADA HIF1A FEN1 NSUN2 VPS35 TRAF5 ABL1 VPS16 KDM4A UBXN4 MBD4
0.0456544	13	1321	2.71292	GO:0022402 cell cycle process	http://amigo.geneontology.org/amigo/term/GO:0022402	TPR SMC1A NEK11 NAA50 DCTN3 HAUS7 CENPE NSUN2 CUL4A CUL4B PDE3A RIOK2 FEN1
0.0481547	5	209	6.59509	GO:0000070 mitotic sister chromatid segregation	http://amigo.geneontology.org/amigo/term/GO:0000070	NAA50 CENPE SMC1A TPR RIOK2
0.0481547	2	13	42.4115	GO:0046831 regulation of RNA export from nucleus	http://amigo.geneontology.org/amigo/term/GO:0046831	NSUN2 TPR
0.0491501	2	14	39.3821	GO:0033169 histone H3-K9 demethylation	http://amigo.geneontology.org/amigo/term/GO:0033169	KDM4C KDM4A
0.0491501	2	14	39.3821	GO:0034085 establishment of sister chromatid cohesion	http://amigo.geneontology.org/amigo/term/GO:0034085	SMC1A NAA50
0.0491501	15	1700	2.43242	GO:0045595 regulation of cell differentiation	http://amigo.geneontology.org/amigo/term/GO:0045595	PDE3A HIF1A TRAF6 NSUN2 CDK13 KDM4A ABL1 KDM4C VNN1 LOXL3 CUL4A PTPRD NPNT ADA ITCH
0.0491501	12	1173	2.8202	GO:0051276 chromosome organization	http://amigo.geneontology.org/amigo/term/GO:0051276	KDM4A SMC1A KDM4C NAA50 ZNFX1 PIF1 ABL1 CENPE KDM6A TPR RIOK2 FEN1
0.0491501	2	14	39.3821	GO:0051573 negative regulation of histone H3-K9 methylation	http://amigo.geneontology.org/amigo/term/GO:0051573	KDM4A KDM4C
0.0491501	14	1529	2.52416	GO:0080134 regulation of response to stress	http://amigo.geneontology.org/amigo/term/GO:0080134	TRAF5 TRAF3 FEM1A TRAF6 NLRC4 ABL1 HIF1A ITCH VNN1 ZNFX1 CUL4A PTPRF ADA VPS35
0.0491501	2	14	39.3821	GO:0097398 cellular response to interleukin-17	http://amigo.geneontology.org/amigo/term/GO:0097398	TRAF5 TRAF6
0.0491501	2	14	39.3821	GO:1900112 regulation of histone H3-K9 trimethylation	http://amigo.geneontology.org/amigo/term/GO:1900112	KDM4A KDM4C
0.0499544	4	130	8.4823	GO:0001838 embryonic epithelial tube formation	http://amigo.geneontology.org/amigo/term/GO:0001838	ABL1 HIF1A KDM6A TRAF6
0.0499544	8	589	3.74431	GO:0006914 autophagy	http://amigo.geneontology.org/amigo/term/GO:0006914	SNX14 RAB43 ABL1 HIF1A VPS16 KDM4A VPS35 NEDD4
0.0499544	3	58	14.259	GO:0007062 sister chromatid cohesion	http://amigo.geneontology.org/amigo/term/GO:0007062	SMC1A NAA50 FEN1
0.0499544	6	335	4.93746	GO:0016236 macroautophagy	http://amigo.geneontology.org/amigo/term/GO:0016236	SNX14 RAB43 HIF1A VPS16 VPS35 NEDD4
0.0499544	2	15	36.7566	GO:0035791 platelet-derived growth factor receptor-beta signaling pathway	http://amigo.geneontology.org/amigo/term/GO:0035791	ABL1 HIP1
0.0499544	2	15	36.7566	GO:0048820 hair follicle maturation	http://amigo.geneontology.org/amigo/term/GO:0048820	NSUN2 NOM1
0.0499544	12	1213	2.7272	GO:0051726 regulation of cell cycle	http://amigo.geneontology.org/amigo/term/GO:0051726	TPR NEK11 NSUN2 CDK13 ABL1 CUL4A CUL4B PDE3A RIOK2 CENPE FEN1 BOP1
0.0499544	8	589	3.74431	GO:0061919 process utilizing autophagic mechanism	http://amigo.geneontology.org/amigo/term/GO:0061919	SNX14 RAB43 ABL1 HIF1A VPS16 KDM4A VPS35 NEDD4
0.0499544	2	15	36.7566	GO:0070243 regulation of thymocyte apoptotic process	http://amigo.geneontology.org/amigo/term/GO:0070243	HIF1A ADA
0.0499544	2	15	36.7566	GO:0097396 response to interleukin-17	http://amigo.geneontology.org/amigo/term/GO:0097396	TRAF5 TRAF6
0.0499544	6	333	4.96711	GO:0098813 nuclear chromosome segregation	http://amigo.geneontology.org/amigo/term/GO:0098813	SMC1A NAA50 CENPE TPR RIOK2 FEN1
0.0499544	7	457	4.22259	GO:1903706 regulation of hemopoiesis	http://amigo.geneontology.org/amigo/term/GO:1903706	HIF1A TRAF6 ABL1 VNN1 LOXL3 CUL4A ADA
0.0530768	2	16	34.4593	GO:0032239 regulation of nucleobase-containing compound transport	http://amigo.geneontology.org/amigo/term/GO:0032239	NSUN2 TPR
0.0530768	2	16	34.4593	GO:2000232 regulation of rRNA processing	http://amigo.geneontology.org/amigo/term/GO:2000232	WDR75 RIOK2
0.0544493	5	232	5.94127	GO:0050803 regulation of synapse structure or activity	http://amigo.geneontology.org/amigo/term/GO:0050803	NEDD4 PTPRD ABL1 VPS35 PPT1
0.0560079	4	139	7.93308	GO:0007041 lysosomal transport	http://amigo.geneontology.org/amigo/term/GO:0007041	NEDD4 VPS35 VPS53 VPS16
0.0560079	3	64	12.9223	GO:0046824 positive regulation of nucleocytoplasmic transport	http://amigo.geneontology.org/amigo/term/GO:0046824	NEDD4 TPR RIOK2
0.0561469	7	474	4.07115	GO:1901987 regulation of cell cycle phase transition	http://amigo.geneontology.org/amigo/term/GO:1901987	NEK11 NSUN2 CUL4A CUL4B TPR RIOK2 CENPE
0.0564401	2	17	32.4323	GO:1902036 regulation of hematopoietic stem cell differentiation	http://amigo.geneontology.org/amigo/term/GO:1902036	ITCH ABL1
0.0568711	11	1078	2.81301	GO:1902533 positive regulation of intracellular signal transduction	http://amigo.geneontology.org/amigo/term/GO:1902533	TRAF5 TRAF3 TRAF6 ROR1 HIP1 ABL1 VNN1 NPNT ADA TPR NEDD4
0.0585615	4	143	7.71118	GO:0072175 epithelial tube formation	http://amigo.geneontology.org/amigo/term/GO:0072175	ABL1 HIF1A KDM6A TRAF6
0.0585615	6	354	4.67245	GO:1902105 regulation of leukocyte differentiation	http://amigo.geneontology.org/amigo/term/GO:1902105	TRAF6 ABL1 VNN1 LOXL3 CUL4A ADA
0.0591227	2	18	30.6305	GO:0016045 detection of bacterium	http://amigo.geneontology.org/amigo/term/GO:0016045	NLRC4 DMBT1
0.0591227	2	18	30.6305	GO:0033631 cell-cell adhesion mediated by integrin	http://amigo.geneontology.org/amigo/term/GO:0033631	ADA NPNT
0.0591227	6	357	4.63319	GO:1901990 regulation of mitotic cell cycle phase transition	http://amigo.geneontology.org/amigo/term/GO:1901990	NEK11 CUL4A CUL4B TPR RIOK2 CENPE
0.0605416	5	248	5.55796	GO:0006364 rRNA processing	http://amigo.geneontology.org/amigo/term/GO:0006364	MTREX RIOK2 RRP15 WDR75 BOP1
0.0605416	21	3005	1.92651	GO:0006796 phosphate-containing compound metabolic process	http://amigo.geneontology.org/amigo/term/GO:0006796	CDK13 PTPRF PIGM PTPRD MOB1B ROR1 PTPRT HIF1A ABL1 NEK11 TRAF6 RIOK2 PTPRQ TBCK COX11 NPNT DGAT1 ADA CENPE MBD4 PPT1
0.0605416	9	781	3.17679	GO:0010564 regulation of cell cycle process	http://amigo.geneontology.org/amigo/term/GO:0010564	TPR NEK11 NSUN2 CUL4A CUL4B PDE3A RIOK2 CENPE FEN1
0.0605416	15	1810	2.2846	GO:0010941 regulation of cell death	http://amigo.geneontology.org/amigo/term/GO:0010941	ABL1 NLRC4 HIF1A HIP1 PPT1 KDM4A VPS35 TRAF5 VNN1 TRAF3 PDE3A TRAF6 ADA ITCH DDX42
0.0605416	28	4552	1.69571	GO:0030154 cell differentiation	http://amigo.geneontology.org/amigo/term/GO:0030154	NEO1 NEDD4 PDE3A ROR1 HIF1A LOXL3 TRAF6 NSUN2 CDK13 KDM4A ABL1 KDM4C VNN1 HIP1 PTPRQ CUL4A PTPRF KDM6A PTPRD CUL4B SIM2 NPNT DMBT1 ADA SOAT1 FSIP2 ITCH PPT1
0.0605416	2	19	29.0184	GO:0036124 histone H3-K9 trimethylation	http://amigo.geneontology.org/amigo/term/GO:0036124	KDM4A KDM4C
0.0605416	9	782	3.17273	GO:0080135 regulation of cellular response to stress	http://amigo.geneontology.org/amigo/term/GO:0080135	TRAF5 TRAF3 TRAF6 ABL1 HIF1A ITCH VNN1 CUL4A PTPRF
0.0605416	11	1104	2.74676	GO:0098609 cell-cell adhesion	http://amigo.geneontology.org/amigo/term/GO:0098609	NEO1 PTPRF PTPRD PTPRT ADA ITCH ABL1 VNN1 LOXL3 NPNT TRAF6
0.0628593	21	3030	1.91062	GO:0006793 phosphorus metabolic process	http://amigo.geneontology.org/amigo/term/GO:0006793	CDK13 PTPRF PIGM PTPRD MOB1B ROR1 PTPRT HIF1A ABL1 NEK11 TRAF6 RIOK2 PTPRQ TBCK COX11 NPNT DGAT1 ADA CENPE MBD4 PPT1
0.0628896	3	72	11.4864	GO:0002260 lymphocyte homeostasis	http://amigo.geneontology.org/amigo/term/GO:0002260	ABL1 HIF1A ADA
0.0628896	4	152	7.2546	GO:0046328 regulation of JNK cascade	http://amigo.geneontology.org/amigo/term/GO:0046328	TRAF5 TRAF3 TRAF6 ITCH
0.0628896	28	4576	1.68682	GO:0048869 cellular developmental process	http://amigo.geneontology.org/amigo/term/GO:0048869	NEO1 NEDD4 PDE3A ROR1 HIF1A LOXL3 TRAF6 NSUN2 CDK13 KDM4A ABL1 KDM4C VNN1 HIP1 PTPRQ CUL4A PTPRF KDM6A PTPRD CUL4B SIM2 NPNT DMBT1 ADA SOAT1 FSIP2 ITCH PPT1
0.0640885	18	2427	2.04456	GO:0048584 positive regulation of response to stimulus	http://amigo.geneontology.org/amigo/term/GO:0048584	TRAF5 TRAF3 TRAF6 ROR1 NLRC4 HIF1A HIP1 VPS35 NEO1 ABL1 VNN1 LOXL3 ZNFX1 NPNT ADA TPR NEDD4 FEM1A
0.0656561	4	155	7.11419	GO:0009411 response to UV	http://amigo.geneontology.org/amigo/term/GO:0009411	CUL4A CUL4B NEDD4 FEN1
0.0659617	20	2847	1.9366	GO:0035556 intracellular signal transduction	http://amigo.geneontology.org/amigo/term/GO:0035556	TRAF5 NEK11 TRAF3 PDE3A MOB1B TRAF6 ROR1 HIP1 ABL1 HIF1A NSUN2 ITCH VNN1 CUL4A NPNT ADA TPR NEDD4 TBCK BOP1
0.0665325	4	157	7.02356	GO:0016331 morphogenesis of embryonic epithelium	http://amigo.geneontology.org/amigo/term/GO:0016331	ABL1 HIF1A KDM6A TRAF6
0.0665325	4	157	7.02356	GO:0035148 tube formation	http://amigo.geneontology.org/amigo/term/GO:0035148	ABL1 HIF1A KDM6A TRAF6
0.0665325	2	21	26.2547	GO:0070242 thymocyte apoptotic process	http://amigo.geneontology.org/amigo/term/GO:0070242	HIF1A ADA
0.0665325	2	21	26.2547	GO:0098543 detection of other organism	http://amigo.geneontology.org/amigo/term/GO:0098543	NLRC4 DMBT1
0.0697901	16	2065	2.13598	GO:0006915 apoptotic process	http://amigo.geneontology.org/amigo/term/GO:0006915	ABL1 NLRC4 HIF1A HIP1 PPT1 ITCH TRAF5 VNN1 TRAF3 AIMP1 PDE3A TRAF6 ADA VPS35 DDX42 CUL4A
0.0697901	3	77	10.7406	GO:0070988 demethylation	http://amigo.geneontology.org/amigo/term/GO:0070988	KDM6A KDM4A KDM4C
0.0704316	5	266	5.18186	GO:0000209 protein polyubiquitination	http://amigo.geneontology.org/amigo/term/GO:0000209	NEDD4 ITCH TRAF5 TRAF3 TRAF6
0.0707668	3	78	10.6029	GO:0002218 activation of innate immune response	http://amigo.geneontology.org/amigo/term/GO:0002218	ZNFX1 NLRC4 TRAF6
0.0742223	13	1514	2.36709	GO:0009057 macromolecule catabolic process	http://amigo.geneontology.org/amigo/term/GO:0009057	MTREX NEDD4 ITCH UBA1 PPT1 CUL4A FEM1A CUL4B FEN1 NSUN2 VPS35 TRAF5 UBXN4
0.0770856	10	996	2.76782	GO:0000278 mitotic cell cycle	http://amigo.geneontology.org/amigo/term/GO:0000278	TPR NEK11 NAA50 CENPE SMC1A ABL1 CUL4A CUL4B RIOK2 DCTN3
0.07753	7	534	3.61371	GO:0007346 regulation of mitotic cell cycle	http://amigo.geneontology.org/amigo/term/GO:0007346	NEK11 ABL1 CUL4A CUL4B TPR RIOK2 CENPE
0.07753	8	680	3.24323	GO:0043009 chordate embryonic development	http://amigo.geneontology.org/amigo/term/GO:0043009	NSUN2 ABL1 HIF1A KDM4C CUL4A KDM6A TRAF6 ADA
0.0778529	10	1001	2.75399	GO:0030097 hemopoiesis	http://amigo.geneontology.org/amigo/term/GO:0030097	HIF1A TRAF6 ABL1 VNN1 LOXL3 PTPRQ CUL4A ADA CDK13 ITCH
0.0783074	4	169	6.52484	GO:0021915 neural tube development	http://amigo.geneontology.org/amigo/term/GO:0021915	ABL1 HIF1A KDM6A TRAF6
0.0783432	2	24	22.9729	GO:0006123 mitochondrial electron transport cytochrome c to oxygen	http://amigo.geneontology.org/amigo/term/GO:0006123	MT-CO1 COX15
0.0783432	18	2509	1.97774	GO:0051128 regulation of cellular component organization	http://amigo.geneontology.org/amigo/term/GO:0051128	TPR NEDD4 ROR1 VPS16 PIF1 PTPRD VPS35 ABL1 HIF1A HIP1 PTPRF PDE3A RIOK2 PPT1 CENPE SACS FEN1 ITCH
0.0786362	5	279	4.94041	GO:0043122 regulation of I-kappaB kinase/NF-kappaB signaling	http://amigo.geneontology.org/amigo/term/GO:0043122	TRAF5 TRAF3 TRAF6 ROR1 ABL1
0.0786362	22	3356	1.80716	GO:0065009 regulation of molecular function	http://amigo.geneontology.org/amigo/term/GO:0065009	NEDD4 TRAF5 HIP1 TRAF3 TBCK TRAF6 ROR1 NLRC4 ABL1 PIF1 PDE3A PTPRT ITCH HIF1A PPT1 RGS3 COX11 NPNT MOB1B CENPE PTPRF FEM1A
0.0786906	17	2320	2.02003	GO:0008219 cell death	http://amigo.geneontology.org/amigo/term/GO:0008219	ABL1 NLRC4 HIF1A HIP1 PPT1 KDM4A VPS35 ITCH TRAF5 VNN1 TRAF3 AIMP1 PDE3A TRAF6 ADA DDX42 CUL4A
0.0786906	3	85	9.7297	GO:0008306 associative learning	http://amigo.geneontology.org/amigo/term/GO:0008306	ABL1 HIF1A PPT1
0.0786906	11	1189	2.5504	GO:0009790 embryo development	http://amigo.geneontology.org/amigo/term/GO:0009790	NSUN2 ABL1 HIF1A KDM4C LOXL3 PTPRQ CUL4A KDM6A SIM2 TRAF6 ADA
0.0786906	7	543	3.55382	GO:0016570 histone modification	http://amigo.geneontology.org/amigo/term/GO:0016570	PCGF1 NAA50 KDM6A KDM4A KDM4C CUL4B NEK11
0.0786906	5	281	4.90524	GO:0033044 regulation of chromosome organization	http://amigo.geneontology.org/amigo/term/GO:0033044	PIF1 TPR RIOK2 CENPE FEN1
0.0786906	8	689	3.20087	GO:0051301 cell division	http://amigo.geneontology.org/amigo/term/GO:0051301	DCTN3 NSUN2 TPR CDK13 SMC1A CENPE LMLN HAUS7
0.0786906	2	25	22.054	GO:0099637 neurotransmitter receptor transport	http://amigo.geneontology.org/amigo/term/GO:0099637	VPS35 HIP1
0.0786906	2	25	22.054	GO:1904893 negative regulation of receptor signaling pathway via STAT	http://amigo.geneontology.org/amigo/term/GO:1904893	PTPRT PTPRD
0.0787361	16	2127	2.07372	GO:0012501 programmed cell death	http://amigo.geneontology.org/amigo/term/GO:0012501	ABL1 NLRC4 HIF1A HIP1 PPT1 ITCH TRAF5 VNN1 TRAF3 AIMP1 PDE3A TRAF6 ADA VPS35 DDX42 CUL4A
0.0792199	3	86	9.61656	GO:1903201 regulation of oxidative stress-induced cell death	http://amigo.geneontology.org/amigo/term/GO:1903201	HIF1A ABL1 VNN1
0.0794055	11	1194	2.53972	GO:0009628 response to abiotic stimulus	http://amigo.geneontology.org/amigo/term/GO:0009628	HIF1A CUL4A CUL4B TPR ADA SCAP PTPRQ MT-CO1 SMC1A NEDD4 FEN1
0.0798007	10	1025	2.68951	GO:0007167 enzyme linked receptor protein signaling pathway	http://amigo.geneontology.org/amigo/term/GO:0007167	HIF1A NEO1 ABL1 NPNT ROR1 HIP1 PTPRT NEDD4 PTPRF PTPRD
0.0798007	8	702	3.14159	GO:0009792 embryo development ending in birth or egg hatching	http://amigo.geneontology.org/amigo/term/GO:0009792	NSUN2 ABL1 HIF1A KDM4C CUL4A KDM6A TRAF6 ADA
0.0798007	5	288	4.78602	GO:0016072 rRNA metabolic process	http://amigo.geneontology.org/amigo/term/GO:0016072	MTREX RIOK2 RRP15 WDR75 BOP1
0.0798007	2	26	21.2057	GO:0031061 negative regulation of histone methylation	http://amigo.geneontology.org/amigo/term/GO:0031061	KDM4A KDM4C
0.0798007	2	26	21.2057	GO:0070233 negative regulation of T cell apoptotic process	http://amigo.geneontology.org/amigo/term/GO:0070233	HIF1A ADA
0.0800738	4	178	6.19494	GO:0007034 vacuolar transport	http://amigo.geneontology.org/amigo/term/GO:0007034	NEDD4 VPS35 VPS53 VPS16
0.0822778	3	89	9.29241	GO:0033077 T cell differentiation in thymus	http://amigo.geneontology.org/amigo/term/GO:0033077	ABL1 VNN1 ADA
0.0841661	2	27	20.4203	GO:0051570 regulation of histone H3-K9 methylation	http://amigo.geneontology.org/amigo/term/GO:0051570	KDM4A KDM4C
0.0848758	7	564	3.42149	GO:0048285 organelle fission	http://amigo.geneontology.org/amigo/term/GO:0048285	TPR NAA50 SMC1A CENPE PDE3A RIOK2 VPS35
0.0848758	10	1042	2.64563	GO:0048534 hematopoietic or lymphoid organ development	http://amigo.geneontology.org/amigo/term/GO:0048534	HIF1A TRAF6 ABL1 VNN1 LOXL3 PTPRQ CUL4A ADA CDK13 ITCH
0.0855884	2	28	19.691	GO:0007064 mitotic sister chromatid cohesion	http://amigo.geneontology.org/amigo/term/GO:0007064	NAA50 SMC1A
0.0855884	2	28	19.691	GO:0009264 deoxyribonucleotide catabolic process	http://amigo.geneontology.org/amigo/term/GO:0009264	ADA MBD4
0.0855884	2	28	19.691	GO:0032801 receptor catabolic process	http://amigo.geneontology.org/amigo/term/GO:0032801	NEDD4 ITCH
0.0855884	2	28	19.691	GO:0033081 regulation of T cell differentiation in thymus	http://amigo.geneontology.org/amigo/term/GO:0033081	VNN1 ADA
0.0855884	3	92	8.98939	GO:0034644 cellular response to UV	http://amigo.geneontology.org/amigo/term/GO:0034644	CUL4A CUL4B NEDD4
0.0855884	16	2175	2.02795	GO:0071705 nitrogen compound transport	http://amigo.geneontology.org/amigo/term/GO:0071705	TPR VPS35 RHBG RAB43 AP1B1 NSUN2 HIF1A SNX14 VPS53 COG7 DMBT1 VPS16 PPT1 NEDD4 AIMP1 HIP1
0.0855884	2	28	19.691	GO:0099560 synaptic membrane adhesion	http://amigo.geneontology.org/amigo/term/GO:0099560	PTPRF PTPRD
0.085936	3	94	8.79813	GO:0001843 neural tube closure	http://amigo.geneontology.org/amigo/term/GO:0001843	ABL1 KDM6A TRAF6
0.085936	9	892	2.78147	GO:0006954 inflammatory response	http://amigo.geneontology.org/amigo/term/GO:0006954	LOXL3 FEM1A NLRC4 HIF1A VNN1 AIMP1 ADA VPS35 ITCH
0.085936	3	95	8.70552	GO:0030071 regulation of mitotic metaphase/anaphase transition	http://amigo.geneontology.org/amigo/term/GO:0030071	TPR RIOK2 CENPE
0.085936	2	29	19.012	GO:0030947 regulation of vascular endothelial growth factor receptor signaling pathway	http://amigo.geneontology.org/amigo/term/GO:0030947	HIF1A NEDD4
0.085936	8	731	3.01696	GO:0031347 regulation of defense response	http://amigo.geneontology.org/amigo/term/GO:0031347	FEM1A NLRC4 ITCH ZNFX1 TRAF3 ADA VPS35 TRAF6
0.085936	2	29	19.012	GO:0035518 histone H2A monoubiquitination	http://amigo.geneontology.org/amigo/term/GO:0035518	PCGF1 CUL4B
0.085936	13	1594	2.24829	GO:0042981 regulation of apoptotic process	http://amigo.geneontology.org/amigo/term/GO:0042981	ABL1 NLRC4 HIF1A HIP1 PPT1 TRAF5 VNN1 TRAF3 PDE3A TRAF6 ADA ITCH DDX42
0.085936	14	1795	2.15011	GO:0045184 establishment of protein localization	http://amigo.geneontology.org/amigo/term/GO:0045184	VPS35 RAB43 AP1B1 TPR HIF1A SNX14 VPS53 COG7 NPNT DMBT1 VPS16 PPT1 NEDD4 HIP1
0.085936	2	29	19.012	GO:0046386 deoxyribose phosphate catabolic process	http://amigo.geneontology.org/amigo/term/GO:0046386	ADA MBD4
0.085936	3	95	8.70552	GO:0060606 tube closure	http://amigo.geneontology.org/amigo/term/GO:0060606	ABL1 KDM6A TRAF6
0.085936	2	29	19.012	GO:1902175 regulation of oxidative stress-induced intrinsic apoptotic signaling pathway	http://amigo.geneontology.org/amigo/term/GO:1902175	HIF1A VNN1
0.0882105	4	191	5.77329	GO:0007254 JNK cascade	http://amigo.geneontology.org/amigo/term/GO:0007254	TRAF5 TRAF3 TRAF6 ITCH
0.0888718	3	97	8.52602	GO:0007091 metaphase/anaphase transition of mitotic cell cycle	http://amigo.geneontology.org/amigo/term/GO:0007091	TPR RIOK2 CENPE
0.0888718	3	97	8.52602	GO:0007589 body fluid secretion	http://amigo.geneontology.org/amigo/term/GO:0007589	CSN3 HIF1A ADA
0.0888718	2	30	18.3783	GO:0098581 detection of external biotic stimulus	http://amigo.geneontology.org/amigo/term/GO:0098581	NLRC4 DMBT1
0.0893032	4	193	5.71347	GO:0051092 positive regulation of NF-kappaB transcription factor activity	http://amigo.geneontology.org/amigo/term/GO:0051092	TRAF5 TRAF6 NLRC4 ROR1
0.0898179	3	98	8.43902	GO:1900407 regulation of cellular response to oxidative stress	http://amigo.geneontology.org/amigo/term/GO:1900407	HIF1A ABL1 VNN1
0.0898179	3	98	8.43902	GO:1902099 regulation of metaphase/anaphase transition of cell cycle	http://amigo.geneontology.org/amigo/term/GO:1902099	TPR RIOK2 CENPE
0.0911941	3	99	8.35378	GO:0010965 regulation of mitotic sister chromatid separation	http://amigo.geneontology.org/amigo/term/GO:0010965	TPR RIOK2 CENPE
0.0911941	13	1627	2.20269	GO:0043067 regulation of programmed cell death	http://amigo.geneontology.org/amigo/term/GO:0043067	ABL1 NLRC4 HIF1A HIP1 PPT1 TRAF5 VNN1 TRAF3 PDE3A TRAF6 ADA ITCH DDX42
0.0911941	2	31	17.7855	GO:0045987 positive regulation of smooth muscle contraction	http://amigo.geneontology.org/amigo/term/GO:0045987	NPNT ADA
0.0927998	3	100	8.27024	GO:0044784 metaphase/anaphase transition of cell cycle	http://amigo.geneontology.org/amigo/term/GO:0044784	TPR RIOK2 CENPE
0.0937355	4	198	5.56919	GO:0045580 regulation of T cell differentiation	http://amigo.geneontology.org/amigo/term/GO:0045580	ABL1 VNN1 LOXL3 ADA
0.0941259	2	32	17.2297	GO:0000470 maturation of LSU-rRNA	http://amigo.geneontology.org/amigo/term/GO:0000470	RRP15 BOP1
0.0941259	5	318	4.33451	GO:0007249 I-kappaB kinase/NF-kappaB signaling	http://amigo.geneontology.org/amigo/term/GO:0007249	TRAF5 TRAF3 TRAF6 ROR1 ABL1
0.0941259	2	32	17.2297	GO:0035335 peptidyl-tyrosine dephosphorylation	http://amigo.geneontology.org/amigo/term/GO:0035335	PTPRF PTPRT
0.0941259	7	598	3.22696	GO:0044770 cell cycle phase transition	http://amigo.geneontology.org/amigo/term/GO:0044770	NEK11 NSUN2 CUL4A CUL4B TPR RIOK2 CENPE
0.0942177	3	102	8.10808	GO:0051306 mitotic sister chromatid separation	http://amigo.geneontology.org/amigo/term/GO:0051306	TPR RIOK2 CENPE
0.0942177	11	1271	2.38585	GO:0060429 epithelium development	http://amigo.geneontology.org/amigo/term/GO:0060429	NSUN2 ABL1 HIF1A LOXL3 PTPRQ NOM1 KDM6A NPNT TRAF6 ROR1 DMBT1
0.0962332	5	321	4.294	GO:0090287 regulation of cellular response to growth factor stimulus	http://amigo.geneontology.org/amigo/term/GO:0090287	HIF1A NEO1 ABL1 NPNT NEDD4
0.0972187	4	203	5.43201	GO:0032872 regulation of stress-activated MAPK cascade	http://amigo.geneontology.org/amigo/term/GO:0032872	TRAF5 TRAF3 TRAF6 ITCH
0.0972187	2	33	16.7076	GO:0034377 plasma lipoprotein particle assembly	http://amigo.geneontology.org/amigo/term/GO:0034377	SOAT1 DGAT1
0.0986441	10	1108	2.48804	GO:0002520 immune system development	http://amigo.geneontology.org/amigo/term/GO:0002520	HIF1A TRAF6 ITCH ABL1 VNN1 LOXL3 PTPRQ CUL4A ADA CDK13
0.0986441	6	462	3.58019	GO:0034655 nucleobase-containing compound catabolic process	http://amigo.geneontology.org/amigo/term/GO:0034655	MTREX ADA FEN1 NSUN2 TRAF5 MBD4
0.0986441	3	106	7.80211	GO:0036473 cell death in response to oxidative stress	http://amigo.geneontology.org/amigo/term/GO:0036473	HIF1A ABL1 VNN1
0.0986441	4	207	5.32705	GO:0043123 positive regulation of I-kappaB kinase/NF-kappaB signaling	http://amigo.geneontology.org/amigo/term/GO:0043123	ROR1 TRAF6 TRAF5 ABL1
0.0986441	9	933	2.65924	GO:0045597 positive regulation of cell differentiation	http://amigo.geneontology.org/amigo/term/GO:0045597	PDE3A HIF1A TRAF6 KDM4A VNN1 PTPRD NPNT ADA ABL1
0.0986441	3	105	7.87642	GO:0046330 positive regulation of JNK cascade	http://amigo.geneontology.org/amigo/term/GO:0046330	TRAF5 TRAF3 TRAF6
0.0986441	4	207	5.32705	GO:0046631 alpha-beta T cell activation	http://amigo.geneontology.org/amigo/term/GO:0046631	ITCH ABL1 LOXL3 ADA
0.0986441	3	105	7.87642	GO:0050773 regulation of dendrite development	http://amigo.geneontology.org/amigo/term/GO:0050773	NEDD4 ABL1 PTPRD
0.0986441	4	206	5.35291	GO:0070302 regulation of stress-activated protein kinase signaling cascade	http://amigo.geneontology.org/amigo/term/GO:0070302	TRAF5 TRAF3 TRAF6 ITCH
0.0986441	2	34	16.2162	GO:1903209 positive regulation of oxidative stress-induced cell death	http://amigo.geneontology.org/amigo/term/GO:1903209	ABL1 VNN1
0.10042	5	331	4.16427	GO:0009416 response to light stimulus	http://amigo.geneontology.org/amigo/term/GO:0009416	CUL4A CUL4B HIF1A NEDD4 FEN1
0.10042	3	108	7.65763	GO:0033045 regulation of sister chromatid segregation	http://amigo.geneontology.org/amigo/term/GO:0033045	TPR RIOK2 CENPE
0.10042	2	35	15.7528	GO:0099174 regulation of presynapse organization	http://amigo.geneontology.org/amigo/term/GO:0099174	PTPRD VPS35
0.10042	3	108	7.65763	GO:1902882 regulation of response to oxidative stress	http://amigo.geneontology.org/amigo/term/GO:1902882	HIF1A ABL1 VNN1
0.10042	2	35	15.7528	GO:1905606 regulation of presynapse assembly	http://amigo.geneontology.org/amigo/term/GO:1905606	PTPRD VPS35
0.101481	6	471	3.51178	GO:0009314 response to radiation	http://amigo.geneontology.org/amigo/term/GO:0009314	CUL4A CUL4B HIF1A SMC1A NEDD4 FEN1
0.101481	13	1680	2.1332	GO:0015031 protein transport	http://amigo.geneontology.org/amigo/term/GO:0015031	VPS35 RAB43 AP1B1 TPR HIF1A SNX14 VPS53 COG7 DMBT1 VPS16 PPT1 NEDD4 HIP1
0.101481	10	1123	2.45481	GO:0035295 tube development	http://amigo.geneontology.org/amigo/term/GO:0035295	HIF1A ABL1 LOXL3 KDM6A SIM2 FMNL3 AIMP1 NPNT TRAF6 ADA
0.101959	2	36	15.3153	GO:0032743 positive regulation of interleukin-2 production	http://amigo.geneontology.org/amigo/term/GO:0032743	ABL1 TRAF6
0.101959	20	3133	1.75981	GO:0033036 macromolecule localization	http://amigo.geneontology.org/amigo/term/GO:0033036	TPR VPS35 RAB43 AP1B1 NSUN2 DDX42 HIF1A SNX14 VPS53 COG7 NPNT DGAT1 DMBT1 VPS16 SOAT1 ABL1 PPT1 FSIP2 NEDD4 HIP1
0.101959	2	36	15.3153	GO:0051567 histone H3-K9 methylation	http://amigo.geneontology.org/amigo/term/GO:0051567	KDM4A KDM4C
0.101959	2	36	15.3153	GO:0060218 hematopoietic stem cell differentiation	http://amigo.geneontology.org/amigo/term/GO:0060218	ITCH ABL1
0.101959	2	36	15.3153	GO:0065005 protein-lipid complex assembly	http://amigo.geneontology.org/amigo/term/GO:0065005	SOAT1 DGAT1
0.103257	6	476	3.47489	GO:0044772 mitotic cell cycle phase transition	http://amigo.geneontology.org/amigo/term/GO:0044772	NEK11 CUL4A CUL4B TPR RIOK2 CENPE
0.103257	9	956	2.59526	GO:0051338 regulation of transferase activity	http://amigo.geneontology.org/amigo/term/GO:0051338	ROR1 ABL1 PIF1 TRAF6 PTPRT COX11 MOB1B CENPE FEM1A
0.103366	4	215	5.12883	GO:0007051 spindle organization	http://amigo.geneontology.org/amigo/term/GO:0007051	TPR HAUS7 SMC1A CENPE
0.103366	13	1695	2.11432	GO:0016192 vesicle-mediated transport	http://amigo.geneontology.org/amigo/term/GO:0016192	VPS35 NEDD4 AP1B1 HIP1 PPT1 VPS53 COG7 VPS16 ABL1 LOXL3 DMBT1 RAB43 SCAP
0.103969	3	112	7.38414	GO:1905818 regulation of chromosome separation	http://amigo.geneontology.org/amigo/term/GO:1905818	TPR RIOK2 CENPE
0.107376	4	218	5.05825	GO:0002221 pattern recognition receptor signaling pathway	http://amigo.geneontology.org/amigo/term/GO:0002221	NLRC4 TRAF3 ITCH TRAF6
0.107496	6	483	3.42453	GO:0034470 ncRNA processing	http://amigo.geneontology.org/amigo/term/GO:0034470	NSUN2 MTREX RIOK2 RRP15 WDR75 BOP1
0.107555	4	219	5.03515	GO:0000075 cell cycle checkpoint signaling	http://amigo.geneontology.org/amigo/term/GO:0000075	NEK11 NSUN2 CUL4A TPR
0.107555	16	2312	1.90778	GO:1901575 organic substance catabolic process	http://amigo.geneontology.org/amigo/term/GO:1901575	MTREX NEDD4 ITCH UBA1 PPT1 CUL4A FEM1A CUL4B ADA HIF1A FEN1 NSUN2 VPS35 TRAF5 UBXN4 MBD4
0.107999	2	38	14.5092	GO:0070229 negative regulation of lymphocyte apoptotic process	http://amigo.geneontology.org/amigo/term/GO:0070229	HIF1A ADA
0.108101	4	220	5.01227	GO:0007033 vacuole organization	http://amigo.geneontology.org/amigo/term/GO:0007033	RAB43 VPS16 VPS35 PPT1
0.108101	6	486	3.40339	GO:1903037 regulation of leukocyte cell-cell adhesion	http://amigo.geneontology.org/amigo/term/GO:1903037	ITCH ABL1 VNN1 LOXL3 TRAF6 ADA
0.108158	5	346	3.98374	GO:0140014 mitotic nuclear division	http://amigo.geneontology.org/amigo/term/GO:0140014	TPR NAA50 CENPE SMC1A RIOK2
0.108688	6	488	3.38944	GO:0050863 regulation of T cell activation	http://amigo.geneontology.org/amigo/term/GO:0050863	ITCH ABL1 VNN1 LOXL3 TRAF6 ADA
0.108688	9	973	2.54992	GO:0051050 positive regulation of transport	http://amigo.geneontology.org/amigo/term/GO:0051050	NEDD4 VPS35 ABL1 HIF1A HIP1 TPR RIOK2 PPT1 AIMP1
0.109028	2	39	14.1372	GO:0019068 virion assembly	http://amigo.geneontology.org/amigo/term/GO:0019068	NEDD4 RAB43
0.109028	9	975	2.54469	GO:0022603 regulation of anatomical structure morphogenesis	http://amigo.geneontology.org/amigo/term/GO:0022603	NEDD4 FMNL2 FMNL3 HIF1A ABL1 PTPRD ROR1 ADA VPS35
0.109028	2	39	14.1372	GO:0033522 histone H2A ubiquitination	http://amigo.geneontology.org/amigo/term/GO:0033522	PCGF1 CUL4B
0.109028	2	39	14.1372	GO:1901532 regulation of hematopoietic progenitor cell differentiation	http://amigo.geneontology.org/amigo/term/GO:1901532	ITCH ABL1
0.111088	5	351	3.92699	GO:0032386 regulation of intracellular transport	http://amigo.geneontology.org/amigo/term/GO:0032386	NSUN2 TPR NEDD4 RIOK2 VPS35
0.111155	3	118	7.00868	GO:0001776 leukocyte homeostasis	http://amigo.geneontology.org/amigo/term/GO:0001776	ABL1 HIF1A ADA
0.111155	1	3	91.8916	GO:0006157 deoxyadenosine catabolic process	http://amigo.geneontology.org/amigo/term/GO:0006157	ADA
0.111155	1	3	91.8916	GO:0006784 heme A biosynthetic process	http://amigo.geneontology.org/amigo/term/GO:0006784	COX15
0.111155	2	43	12.8221	GO:0009394 2-deoxyribonucleotide metabolic process	http://amigo.geneontology.org/amigo/term/GO:0009394	ADA MBD4
0.111155	2	41	13.4475	GO:0009595 detection of biotic stimulus	http://amigo.geneontology.org/amigo/term/GO:0009595	NLRC4 DMBT1
0.111155	2	41	13.4475	GO:0010390 histone monoubiquitination	http://amigo.geneontology.org/amigo/term/GO:0010390	PCGF1 CUL4B
0.111155	1	3	91.8916	GO:0021502 neural fold elevation formation	http://amigo.geneontology.org/amigo/term/GO:0021502	HIF1A
0.111155	1	3	91.8916	GO:0032240 negative regulation of nucleobase-containing compound transport	http://amigo.geneontology.org/amigo/term/GO:0032240	TPR
0.111155	3	124	6.66955	GO:0033209 tumor necrosis factor-mediated signaling pathway	http://amigo.geneontology.org/amigo/term/GO:0033209	TRAF5 TRAF3 TRAF6
0.111155	1	3	91.8916	GO:0043096 purine nucleobase salvage	http://amigo.geneontology.org/amigo/term/GO:0043096	ADA
0.111155	6	496	3.33477	GO:0043161 proteasome-mediated ubiquitin-dependent protein catabolic process	http://amigo.geneontology.org/amigo/term/GO:0043161	NEDD4 ITCH CUL4A CUL4B FEM1A UBXN4
0.111155	6	512	3.23056	GO:0044270 cellular nitrogen compound catabolic process	http://amigo.geneontology.org/amigo/term/GO:0044270	MTREX ADA FEN1 NSUN2 TRAF5 MBD4
0.111155	4	229	4.81528	GO:0045619 regulation of lymphocyte differentiation	http://amigo.geneontology.org/amigo/term/GO:0045619	ABL1 VNN1 LOXL3 ADA
0.111155	1	3	91.8916	GO:0046060 dATP metabolic process	http://amigo.geneontology.org/amigo/term/GO:0046060	ADA
0.111155	1	3	91.8916	GO:0046090 deoxyadenosine metabolic process	http://amigo.geneontology.org/amigo/term/GO:0046090	ADA
0.111155	1	3	91.8916	GO:0046101 hypoxanthine biosynthetic process	http://amigo.geneontology.org/amigo/term/GO:0046101	ADA
0.111155	1	3	91.8916	GO:0046103 inosine biosynthetic process	http://amigo.geneontology.org/amigo/term/GO:0046103	ADA
0.111155	1	3	91.8916	GO:0046160 heme a metabolic process	http://amigo.geneontology.org/amigo/term/GO:0046160	COX15
0.111155	3	124	6.66955	GO:0046632 alpha-beta T cell differentiation	http://amigo.geneontology.org/amigo/term/GO:0046632	ABL1 LOXL3 ADA
0.111155	6	505	3.27534	GO:0046700 heterocycle catabolic process	http://amigo.geneontology.org/amigo/term/GO:0046700	MTREX ADA FEN1 NSUN2 TRAF5 MBD4
0.111155	26	4617	1.55242	GO:0048731 system development	http://amigo.geneontology.org/amigo/term/GO:0048731	NEO1 NEDD4 PPT1 KDM6A ROR1 HIF1A PTPRD TRAF6 KDM4A VPS35 ITCH ABL1 AP1B1 VNN1 LOXL3 PTPRQ CUL4A PTPRF CUL4B SIM2 FMNL3 AIMP1 NPNT ADA MT-CO1 CDK13
0.111155	17	2582	1.81505	GO:0050790 regulation of catalytic activity	http://amigo.geneontology.org/amigo/term/GO:0050790	HIP1 TBCK ROR1 NLRC4 ABL1 PIF1 PDE3A TRAF6 PTPRT HIF1A PPT1 RGS3 COX11 NPNT MOB1B CENPE FEM1A
0.111155	4	226	4.8792	GO:0050807 regulation of synapse organization	http://amigo.geneontology.org/amigo/term/GO:0050807	NEDD4 PTPRD ABL1 VPS35
0.111155	18	2795	1.77536	GO:0051246 regulation of protein metabolic process	http://amigo.geneontology.org/amigo/term/GO:0051246	NEDD4 ITCH HIP1 MOB1B VPS35 NLRC4 ABL1 TRAF6 PTPRT KDM4A KDM4C TRAF3 CUL4A CUL4B TPR SOAT1 HIF1A CENPE
0.111155	1	3	91.8916	GO:0060114 vestibular receptor cell differentiation	http://amigo.geneontology.org/amigo/term/GO:0060114	PTPRQ
0.111155	1	3	91.8916	GO:0060118 vestibular receptor cell development	http://amigo.geneontology.org/amigo/term/GO:0060118	PTPRQ
0.111155	1	3	91.8916	GO:0060281 regulation of oocyte development	http://amigo.geneontology.org/amigo/term/GO:0060281	PDE3A
0.111155	5	356	3.87184	GO:0060562 epithelial tube morphogenesis	http://amigo.geneontology.org/amigo/term/GO:0060562	ABL1 HIF1A KDM6A NPNT TRAF6
0.111155	1	3	91.8916	GO:0061357 positive regulation of Wnt protein secretion	http://amigo.geneontology.org/amigo/term/GO:0061357	VPS35
0.111155	1	3	91.8916	GO:0070094 positive regulation of glucagon secretion	http://amigo.geneontology.org/amigo/term/GO:0070094	AIMP1
0.111155	1	3	91.8916	GO:0070101 positive regulation of chemokine-mediated signaling pathway	http://amigo.geneontology.org/amigo/term/GO:0070101	HIF1A
0.111155	1	3	91.8916	GO:0070634 transepithelial ammonium transport	http://amigo.geneontology.org/amigo/term/GO:0070634	RHBG
0.111155	9	994	2.49605	GO:0070925 organelle assembly	http://amigo.geneontology.org/amigo/term/GO:0070925	TPR RAB43 HAUS7 AP1B1 CENPE PTPRD SMC1A FSIP2 BOP1
0.111155	1	3	91.8916	GO:0097195 pilomotor reflex	http://amigo.geneontology.org/amigo/term/GO:0097195	NPNT
0.111155	1	3	91.8916	GO:0099074 mitochondrion to lysosome transport	http://amigo.geneontology.org/amigo/term/GO:0099074	VPS35
0.111155	1	3	91.8916	GO:0099075 mitochondrion-derived vesicle mediated transport	http://amigo.geneontology.org/amigo/term/GO:0099075	VPS35
0.111155	1	3	91.8916	GO:1902822 regulation of late endosome to lysosome transport	http://amigo.geneontology.org/amigo/term/GO:1902822	VPS35
0.111155	8	825	2.67321	GO:1903047 mitotic cell cycle process	http://amigo.geneontology.org/amigo/term/GO:1903047	TPR NEK11 NAA50 CENPE SMC1A CUL4A CUL4B RIOK2
0.111155	1	3	91.8916	GO:1903179 regulation of dopamine biosynthetic process	http://amigo.geneontology.org/amigo/term/GO:1903179	VPS35
0.111155	1	3	91.8916	GO:1903335 regulation of vacuolar transport	http://amigo.geneontology.org/amigo/term/GO:1903335	VPS35
0.111155	1	3	91.8916	GO:1904529 regulation of actin filament binding	http://amigo.geneontology.org/amigo/term/GO:1904529	ABL1
0.111155	1	3	91.8916	GO:1905555 positive regulation of blood vessel branching	http://amigo.geneontology.org/amigo/term/GO:1905555	ABL1
0.111155	1	3	91.8916	GO:1905879 regulation of oogenesis	http://amigo.geneontology.org/amigo/term/GO:1905879	PDE3A
0.111155	1	3	91.8916	GO:2000329 negative regulation of T-helper 17 cell lineage commitment	http://amigo.geneontology.org/amigo/term/GO:2000329	LOXL3
0.111155	1	3	91.8916	GO:2000588 positive regulation of platelet-derived growth factor receptor-beta signaling pathway	http://amigo.geneontology.org/amigo/term/GO:2000588	HIP1
0.111755	6	514	3.21799	GO:0000280 nuclear division	http://amigo.geneontology.org/amigo/term/GO:0000280	TPR NAA50 SMC1A CENPE PDE3A RIOK2
0.111755	6	514	3.21799	GO:0051090 regulation of DNA-binding transcription factor activity	http://amigo.geneontology.org/amigo/term/GO:0051090	TRAF5 TRAF3 TRAF6 NLRC4 ITCH ROR1
0.112053	5	369	3.73543	GO:0010506 regulation of autophagy	http://amigo.geneontology.org/amigo/term/GO:0010506	HIF1A KDM4A VPS35 NEDD4 ABL1
0.112152	2	44	12.5307	GO:0009262 deoxyribonucleotide metabolic process	http://amigo.geneontology.org/amigo/term/GO:0009262	ADA MBD4
0.112152	2	44	12.5307	GO:0034661 ncRNA catabolic process	http://amigo.geneontology.org/amigo/term/GO:0034661	NSUN2 MTREX
0.116252	2	45	12.2522	GO:0008631 intrinsic apoptotic signaling pathway in response to oxidative stress	http://amigo.geneontology.org/amigo/term/GO:0008631	HIF1A VNN1
0.116252	2	45	12.2522	GO:0019692 deoxyribose phosphate metabolic process	http://amigo.geneontology.org/amigo/term/GO:0019692	ADA MBD4
0.118605	17	2618	1.7901	GO:0007399 nervous system development	http://amigo.geneontology.org/amigo/term/GO:0007399	NEO1 NEDD4 PPT1 ROR1 PTPRD KDM4A VPS35 ABL1 HIF1A LOXL3 PTPRQ PTPRF KDM6A CUL4B SIM2 TRAF6 MT-CO1
0.11891	2	46	11.9859	GO:0001825 blastocyst formation	http://amigo.geneontology.org/amigo/term/GO:0001825	KDM4C ADA
0.11891	6	525	3.15057	GO:0007159 leukocyte cell-cell adhesion	http://amigo.geneontology.org/amigo/term/GO:0007159	ITCH ABL1 VNN1 LOXL3 TRAF6 ADA
0.11891	6	526	3.14458	GO:0019439 aromatic compound catabolic process	http://amigo.geneontology.org/amigo/term/GO:0019439	MTREX ADA FEN1 NSUN2 TRAF5 MBD4
0.11891	5	378	3.64649	GO:0045787 positive regulation of cell cycle	http://amigo.geneontology.org/amigo/term/GO:0045787	ABL1 CUL4A CUL4B TPR FEN1
0.11891	2	46	11.9859	GO:0070232 regulation of T cell apoptotic process	http://amigo.geneontology.org/amigo/term/GO:0070232	HIF1A ADA
0.11891	3	131	6.31316	GO:0071482 cellular response to light stimulus	http://amigo.geneontology.org/amigo/term/GO:0071482	CUL4A CUL4B NEDD4
0.119322	3	138	5.99293	GO:0002244 hematopoietic progenitor cell differentiation	http://amigo.geneontology.org/amigo/term/GO:0002244	PTPRQ ITCH ABL1
0.119322	1	4	68.9187	GO:0002901 mature B cell apoptotic process	http://amigo.geneontology.org/amigo/term/GO:0002901	ADA
0.119322	1	4	68.9187	GO:0002905 regulation of mature B cell apoptotic process	http://amigo.geneontology.org/amigo/term/GO:0002905	ADA
0.119322	1	4	68.9187	GO:0002906 negative regulation of mature B cell apoptotic process	http://amigo.geneontology.org/amigo/term/GO:0002906	ADA
0.119322	1	4	68.9187	GO:0006154 adenosine catabolic process	http://amigo.geneontology.org/amigo/term/GO:0006154	ADA
0.119322	2	47	11.7308	GO:0006284 base-excision repair	http://amigo.geneontology.org/amigo/term/GO:0006284	FEN1 MBD4
0.119322	1	4	68.9187	GO:0006404 RNA import into nucleus	http://amigo.geneontology.org/amigo/term/GO:0006404	TPR
0.119322	14	2031	1.90027	GO:0006952 defense response	http://amigo.geneontology.org/amigo/term/GO:0006952	NLRC4 LOXL3 FEM1A DMBT1 TRAF3 HIF1A ITCH VNN1 ZNFX1 AIMP1 RAB43 ADA VPS35 TRAF6
0.119322	1	4	68.9187	GO:0007079 mitotic chromosome movement towards spindle pole	http://amigo.geneontology.org/amigo/term/GO:0007079	CENPE
0.119322	2	48	11.4864	GO:0007595 lactation	http://amigo.geneontology.org/amigo/term/GO:0007595	CSN3 HIF1A
0.119322	17	2642	1.77383	GO:0008104 protein localization	http://amigo.geneontology.org/amigo/term/GO:0008104	VPS35 RAB43 AP1B1 DDX42 TPR HIF1A SNX14 VPS53 COG7 NPNT DMBT1 VPS16 ABL1 PPT1 FSIP2 NEDD4 HIP1
0.119322	1	4	68.9187	GO:0009217 purine deoxyribonucleoside triphosphate catabolic process	http://amigo.geneontology.org/amigo/term/GO:0009217	ADA
0.119322	4	249	4.42851	GO:0010001 glial cell differentiation	http://amigo.geneontology.org/amigo/term/GO:0010001	KDM4A ABL1 CUL4B ROR1
0.119322	1	4	68.9187	GO:0015939 pantothenate metabolic process	http://amigo.geneontology.org/amigo/term/GO:0015939	VNN1
0.119322	1	4	68.9187	GO:0015988 energy coupled proton transmembrane transport against electrochemical gradient	http://amigo.geneontology.org/amigo/term/GO:0015988	MT-CO1
0.119322	1	4	68.9187	GO:0015990 electron transport coupled proton transport	http://amigo.geneontology.org/amigo/term/GO:0015990	MT-CO1
0.119322	1	4	68.9187	GO:0016076 snRNA catabolic process	http://amigo.geneontology.org/amigo/term/GO:0016076	MTREX
0.119322	2	48	11.4864	GO:0030866 cortical actin cytoskeleton organization	http://amigo.geneontology.org/amigo/term/GO:0030866	FMNL2 FMNL3
0.119322	1	4	68.9187	GO:0032462 regulation of protein homooligomerization	http://amigo.geneontology.org/amigo/term/GO:0032462	VPS35
0.119322	3	137	6.03667	GO:0032874 positive regulation of stress-activated MAPK cascade	http://amigo.geneontology.org/amigo/term/GO:0032874	TRAF5 TRAF3 TRAF6
0.119322	3	139	5.94981	GO:0034968 histone lysine methylation	http://amigo.geneontology.org/amigo/term/GO:0034968	KDM6A KDM4A KDM4C
0.119322	2	47	11.7308	GO:0035337 fatty-acyl-CoA metabolic process	http://amigo.geneontology.org/amigo/term/GO:0035337	DGAT1 PPT1
0.119322	1	4	68.9187	GO:0038189 neuropilin signaling pathway	http://amigo.geneontology.org/amigo/term/GO:0038189	ABL1
0.119322	1	4	68.9187	GO:0042986 positive regulation of amyloid precursor protein biosynthetic process	http://amigo.geneontology.org/amigo/term/GO:0042986	SOAT1
0.119322	1	4	68.9187	GO:0043137 DNA replication removal of RNA primer	http://amigo.geneontology.org/amigo/term/GO:0043137	FEN1
0.119322	3	134	6.17182	GO:0045931 positive regulation of mitotic cell cycle	http://amigo.geneontology.org/amigo/term/GO:0045931	ABL1 CUL4A CUL4B
0.119322	2	49	11.252	GO:0045933 positive regulation of muscle contraction	http://amigo.geneontology.org/amigo/term/GO:0045933	NPNT ADA
0.119322	1	4	68.9187	GO:0046059 dAMP catabolic process	http://amigo.geneontology.org/amigo/term/GO:0046059	ADA
0.119322	1	4	68.9187	GO:0046100 hypoxanthine metabolic process	http://amigo.geneontology.org/amigo/term/GO:0046100	ADA
0.119322	1	4	68.9187	GO:0046124 purine deoxyribonucleoside catabolic process	http://amigo.geneontology.org/amigo/term/GO:0046124	ADA
0.119322	15	2239	1.84686	GO:0048468 cell development	http://amigo.geneontology.org/amigo/term/GO:0048468	NEO1 NEDD4 PDE3A ROR1 NSUN2 KDM4A ABL1 HIF1A PTPRQ PTPRF PTPRD CUL4B TRAF6 FSIP2 PPT1
0.119322	9	1054	2.35396	GO:0050776 regulation of immune response	http://amigo.geneontology.org/amigo/term/GO:0050776	NLRC4 ABL1 LOXL3 ZNFX1 TRAF3 PTPRD ADA TRAF6 ITCH
0.119322	3	136	6.08106	GO:0051304 chromosome separation	http://amigo.geneontology.org/amigo/term/GO:0051304	TPR RIOK2 CENPE
0.119322	4	255	4.32431	GO:0051403 stress-activated MAPK cascade	http://amigo.geneontology.org/amigo/term/GO:0051403	TRAF5 TRAF3 TRAF6 ITCH
0.119322	3	133	6.21823	GO:0051983 regulation of chromosome segregation	http://amigo.geneontology.org/amigo/term/GO:0051983	TPR RIOK2 CENPE
0.119322	1	4	68.9187	GO:0060167 regulation of adenosine receptor signaling pathway	http://amigo.geneontology.org/amigo/term/GO:0060167	ADA
0.119322	1	4	68.9187	GO:0060574 intestinal epithelial cell maturation	http://amigo.geneontology.org/amigo/term/GO:0060574	HIF1A
0.119322	1	4	68.9187	GO:0061030 epithelial cell differentiation involved in mammary gland alveolus development	http://amigo.geneontology.org/amigo/term/GO:0061030	HIF1A
0.119322	1	4	68.9187	GO:0061356 regulation of Wnt protein secretion	http://amigo.geneontology.org/amigo/term/GO:0061356	VPS35
0.119322	2	48	11.4864	GO:0061647 histone H3-K9 modification	http://amigo.geneontology.org/amigo/term/GO:0061647	KDM4A KDM4C
0.119322	3	139	5.94981	GO:0070304 positive regulation of stress-activated protein kinase signaling cascade	http://amigo.geneontology.org/amigo/term/GO:0070304	TRAF5 TRAF3 TRAF6
0.119322	1	4	68.9187	GO:0071962 mitotic sister chromatid cohesion centromeric	http://amigo.geneontology.org/amigo/term/GO:0071962	NAA50
0.119322	1	4	68.9187	GO:0110010 basolateral protein secretion	http://amigo.geneontology.org/amigo/term/GO:0110010	AP1B1
0.119322	2	49	11.252	GO:1900087 positive regulation of G1/S transition of mitotic cell cycle	http://amigo.geneontology.org/amigo/term/GO:1900087	CUL4A CUL4B
0.119322	1	4	68.9187	GO:1903210 glomerular visceral epithelial cell apoptotic process	http://amigo.geneontology.org/amigo/term/GO:1903210	ABL1
0.119322	1	4	68.9187	GO:1903905 positive regulation of establishment of T cell polarity	http://amigo.geneontology.org/amigo/term/GO:1903905	ABL1
0.119322	1	4	68.9187	GO:1904351 negative regulation of protein catabolic process in the vacuole	http://amigo.geneontology.org/amigo/term/GO:1904351	VPS35
0.119322	1	4	68.9187	GO:1904616 regulation of actin binding	http://amigo.geneontology.org/amigo/term/GO:1904616	ABL1
0.119322	1	4	68.9187	GO:1905166 negative regulation of lysosomal protein catabolic process	http://amigo.geneontology.org/amigo/term/GO:1905166	VPS35
0.119322	1	4	68.9187	GO:1905553 regulation of blood vessel branching	http://amigo.geneontology.org/amigo/term/GO:1905553	ABL1
0.119322	2	48	11.4864	GO:2000515 negative regulation of CD4-positive alpha-beta T cell activation	http://amigo.geneontology.org/amigo/term/GO:2000515	ITCH LOXL3
0.121579	6	549	3.01284	GO:0002764 immune response-regulating signaling pathway	http://amigo.geneontology.org/amigo/term/GO:0002764	NLRC4 ABL1 TRAF3 ADA TRAF6 ITCH
0.121579	2	51	10.8108	GO:0031146 SCF-dependent proteasomal ubiquitin-dependent protein catabolic process	http://amigo.geneontology.org/amigo/term/GO:0031146	CUL4A CUL4B
0.12221	6	550	3.00736	GO:0002009 morphogenesis of an epithelium	http://amigo.geneontology.org/amigo/term/GO:0002009	ABL1 HIF1A KDM6A NPNT TRAF6 ROR1
0.123004	4	261	4.2249	GO:0071695 anatomical structure maturation	http://amigo.geneontology.org/amigo/term/GO:0071695	PDE3A NSUN2 HIF1A NOM1
0.123673	11	1449	2.09277	GO:0030182 neuron differentiation	http://amigo.geneontology.org/amigo/term/GO:0030182	NEO1 NEDD4 ROR1 KDM4A ABL1 HIF1A PTPRQ PTPRF PTPRD CUL4B PPT1
0.123673	4	262	4.20877	GO:0031098 stress-activated protein kinase signaling cascade	http://amigo.geneontology.org/amigo/term/GO:0031098	TRAF5 TRAF3 TRAF6 ITCH
0.123673	2	52	10.6029	GO:0032968 positive regulation of transcription elongation from RNA polymerase II promoter	http://amigo.geneontology.org/amigo/term/GO:0032968	CDK13 MED23
0.123673	27	4987	1.49252	GO:0051234 establishment of localization	http://amigo.geneontology.org/amigo/term/GO:0051234	TPR SOAT1 VPS35 NEDD4 AP1B1 HIP1 PPT1 RHBG VPS53 COG7 CSN3 RAB43 MT-CO1 VPS16 NSUN2 CENPE ABL1 HIF1A LOXL3 SNX14 NPNT DMBT1 ADA COX15 RIOK2 SCAP AIMP1
0.123673	2	52	10.6029	GO:0099054 presynapse assembly	http://amigo.geneontology.org/amigo/term/GO:0099054	PTPRD VPS35
0.123673	6	554	2.98565	GO:1901361 organic cyclic compound catabolic process	http://amigo.geneontology.org/amigo/term/GO:1901361	MTREX ADA FEN1 NSUN2 TRAF5 MBD4
0.124477	3	144	5.74322	GO:0051225 spindle assembly	http://amigo.geneontology.org/amigo/term/GO:0051225	TPR HAUS7 SMC1A
0.12499	5	403	3.42028	GO:0016311 dephosphorylation	http://amigo.geneontology.org/amigo/term/GO:0016311	PTPRF PTPRD PTPRT PTPRQ NPNT
0.125432	20	3365	1.63848	GO:0022607 cellular component assembly	http://amigo.geneontology.org/amigo/term/GO:0022607	TPR ZNFX1 HIP1 RAB43 HAUS7 AP1B1 MED23 VPS16 CENPE PTPRD VPS35 ABL1 COX15 SOAT1 SMC1A SACS DGAT1 FSIP2 BOP1 NLRC4
0.125432	2	53	10.4028	GO:0043536 positive regulation of blood vessel endothelial cell migration	http://amigo.geneontology.org/amigo/term/GO:0043536	ABL1 HIF1A
0.125432	2	53	10.4028	GO:0060071 Wnt signaling pathway planar cell polarity pathway	http://amigo.geneontology.org/amigo/term/GO:0060071	ABL1 ROR1
0.125432	2	53	10.4028	GO:0071827 plasma lipoprotein particle organization	http://amigo.geneontology.org/amigo/term/GO:0071827	SOAT1 DGAT1
0.126327	5	406	3.39501	GO:0002253 activation of immune response	http://amigo.geneontology.org/amigo/term/GO:0002253	ABL1 ZNFX1 ADA TRAF6 NLRC4
0.126327	1	5	55.1349	GO:0006196 AMP catabolic process	http://amigo.geneontology.org/amigo/term/GO:0006196	ADA
0.126327	9	1082	2.29304	GO:0006396 RNA processing	http://amigo.geneontology.org/amigo/term/GO:0006396	NSUN2 MTREX RIOK2 RRP15 RBM41 WDR75 RNPC3 BOP1 CDK13
0.126327	3	151	5.47698	GO:0007052 mitotic spindle organization	http://amigo.geneontology.org/amigo/term/GO:0007052	TPR SMC1A CENPE
0.126327	1	5	55.1349	GO:0009146 purine nucleoside triphosphate catabolic process	http://amigo.geneontology.org/amigo/term/GO:0009146	ADA
0.126327	9	1088	2.2804	GO:0009894 regulation of catabolic process	http://amigo.geneontology.org/amigo/term/GO:0009894	NEDD4 ITCH HIF1A NSUN2 VPS35 TRAF5 CUL4B KDM4A ABL1
0.126327	1	5	55.1349	GO:0010641 positive regulation of platelet-derived growth factor receptor signaling pathway	http://amigo.geneontology.org/amigo/term/GO:0010641	HIP1
0.126327	1	5	55.1349	GO:0018057 peptidyl-lysine oxidation	http://amigo.geneontology.org/amigo/term/GO:0018057	LOXL3
0.126327	1	5	55.1349	GO:0030035 microspike assembly	http://amigo.geneontology.org/amigo/term/GO:0030035	ABL1
0.126327	2	55	10.0245	GO:0031057 negative regulation of histone modification	http://amigo.geneontology.org/amigo/term/GO:0031057	KDM4A KDM4C
0.126327	9	1089	2.2783	GO:0032101 regulation of response to external stimulus	http://amigo.geneontology.org/amigo/term/GO:0032101	FEM1A NLRC4 ITCH ZNFX1 TRAF3 PTPRF TRAF6 ADA VPS35
0.126327	1	5	55.1349	GO:0032263 GMP salvage	http://amigo.geneontology.org/amigo/term/GO:0032263	ADA
0.126327	10	1269	2.17238	GO:0033043 regulation of organelle organization	http://amigo.geneontology.org/amigo/term/GO:0033043	TPR PIF1 ABL1 HIF1A PTPRD PDE3A VPS35 RIOK2 CENPE FEN1
0.126327	1	5	55.1349	GO:0033132 negative regulation of glucokinase activity	http://amigo.geneontology.org/amigo/term/GO:0033132	COX11
0.126327	1	5	55.1349	GO:0042494 detection of bacterial lipoprotein	http://amigo.geneontology.org/amigo/term/GO:0042494	DMBT1
0.126327	10	1280	2.15371	GO:0043085 positive regulation of catalytic activity	http://amigo.geneontology.org/amigo/term/GO:0043085	HIP1 TBCK ROR1 NLRC4 ABL1 TRAF6 NPNT MOB1B CENPE HIF1A
0.126327	1	5	55.1349	GO:0044209 AMP salvage	http://amigo.geneontology.org/amigo/term/GO:0044209	ADA
0.126327	8	910	2.42351	GO:0044257 cellular protein catabolic process	http://amigo.geneontology.org/amigo/term/GO:0044257	NEDD4 ITCH UBA1 CUL4A FEM1A CUL4B VPS35 UBXN4
0.126327	1	5	55.1349	GO:0045541 negative regulation of cholesterol biosynthetic process	http://amigo.geneontology.org/amigo/term/GO:0045541	SCAP
0.126327	4	267	4.12996	GO:0045732 positive regulation of protein catabolic process	http://amigo.geneontology.org/amigo/term/GO:0045732	NEDD4 ITCH CUL4B VPS35
0.126327	1	5	55.1349	GO:0046102 inosine metabolic process	http://amigo.geneontology.org/amigo/term/GO:0046102	ADA
0.126327	1	5	55.1349	GO:0046122 purine deoxyribonucleoside metabolic process	http://amigo.geneontology.org/amigo/term/GO:0046122	ADA
0.126327	3	150	5.51349	GO:0046634 regulation of alpha-beta T cell activation	http://amigo.geneontology.org/amigo/term/GO:0046634	ITCH LOXL3 ADA
0.126327	2	55	10.0245	GO:0048010 vascular endothelial growth factor receptor signaling pathway	http://amigo.geneontology.org/amigo/term/GO:0048010	HIF1A NEDD4
0.126327	3	152	5.44095	GO:0050728 negative regulation of inflammatory response	http://amigo.geneontology.org/amigo/term/GO:0050728	FEM1A ADA VPS35
0.126327	2	55	10.0245	GO:0050885 neuromuscular process controlling balance	http://amigo.geneontology.org/amigo/term/GO:0050885	ABL1 PTPRQ
0.126327	1	5	55.1349	GO:0060161 positive regulation of dopamine receptor signaling pathway	http://amigo.geneontology.org/amigo/term/GO:0060161	VPS35
0.126327	1	5	55.1349	GO:0061355 Wnt protein secretion	http://amigo.geneontology.org/amigo/term/GO:0061355	VPS35
0.126327	7	726	2.65802	GO:0070848 response to growth factor	http://amigo.geneontology.org/amigo/term/GO:0070848	HIF1A TPR NEO1 ABL1 NPNT PDE3A NEDD4
0.126327	4	272	4.05404	GO:0071356 cellular response to tumor necrosis factor	http://amigo.geneontology.org/amigo/term/GO:0071356	TRAF5 TRAF3 TRAF6 NPNT
0.126327	1	5	55.1349	GO:0071557 histone H3-K27 demethylation	http://amigo.geneontology.org/amigo/term/GO:0071557	KDM6A
0.126327	2	56	9.84552	GO:0071825 protein-lipid complex subunit organization	http://amigo.geneontology.org/amigo/term/GO:0071825	SOAT1 DGAT1
0.126327	4	274	4.02445	GO:0090068 positive regulation of cell cycle process	http://amigo.geneontology.org/amigo/term/GO:0090068	CUL4A CUL4B TPR FEN1
0.126327	1	5	55.1349	GO:0090206 negative regulation of cholesterol metabolic process	http://amigo.geneontology.org/amigo/term/GO:0090206	SCAP
0.126327	1	5	55.1349	GO:0090325 regulation of locomotion involved in locomotory behavior	http://amigo.geneontology.org/amigo/term/GO:0090325	VPS35
0.126327	1	5	55.1349	GO:0097411 hypoxia-inducible factor-1alpha signaling pathway	http://amigo.geneontology.org/amigo/term/GO:0097411	HIF1A
0.126327	2	55	10.0245	GO:0099172 presynapse organization	http://amigo.geneontology.org/amigo/term/GO:0099172	PTPRD VPS35
0.126327	1	5	55.1349	GO:0106119 negative regulation of sterol biosynthetic process	http://amigo.geneontology.org/amigo/term/GO:0106119	SCAP
0.126327	5	417	3.30545	GO:0140694 non-membrane-bounded organelle assembly	http://amigo.geneontology.org/amigo/term/GO:0140694	TPR HAUS7 CENPE SMC1A BOP1
0.126327	1	5	55.1349	GO:1901300 positive regulation of hydrogen peroxide-mediated programmed cell death	http://amigo.geneontology.org/amigo/term/GO:1901300	ABL1
0.126327	1	5	55.1349	GO:1903300 negative regulation of hexokinase activity	http://amigo.geneontology.org/amigo/term/GO:1903300	COX11
0.126327	4	270	4.08407	GO:1903320 regulation of protein modification by small protein conjugation or removal	http://amigo.geneontology.org/amigo/term/GO:1903320	ABL1 ITCH HIF1A TRAF6
0.126327	1	5	55.1349	GO:1903377 negative regulation of oxidative stress-induced neuron intrinsic apoptotic signaling pathway	http://amigo.geneontology.org/amigo/term/GO:1903377	HIF1A
0.126327	1	5	55.1349	GO:1990051 activation of protein kinase C activity	http://amigo.geneontology.org/amigo/term/GO:1990051	ABL1
0.127115	8	918	2.40239	GO:0031329 regulation of cellular catabolic process	http://amigo.geneontology.org/amigo/term/GO:0031329	HIF1A NSUN2 VPS35 TRAF5 KDM4A ITCH NEDD4 ABL1
0.127293	2	57	9.6728	GO:0090175 regulation of establishment of planar polarity	http://amigo.geneontology.org/amigo/term/GO:0090175	ABL1 ROR1
0.129229	3	154	5.37029	GO:0032147 activation of protein kinase activity	http://amigo.geneontology.org/amigo/term/GO:0032147	ABL1 TRAF6 MOB1B
0.129495	3	155	5.33564	GO:0007612 learning	http://amigo.geneontology.org/amigo/term/GO:0007612	ABL1 HIF1A PPT1
0.129495	3	155	5.33564	GO:0018022 peptidyl-lysine methylation	http://amigo.geneontology.org/amigo/term/GO:0018022	KDM6A KDM4A KDM4C
0.129495	2	58	9.50602	GO:0043618 regulation of transcription from RNA polymerase II promoter in response to stress	http://amigo.geneontology.org/amigo/term/GO:0043618	HIF1A NEDD4
0.129495	2	58	9.50602	GO:0048008 platelet-derived growth factor receptor signaling pathway	http://amigo.geneontology.org/amigo/term/GO:0048008	ABL1 HIP1
0.129495	2	58	9.50602	GO:0051438 regulation of ubiquitin-protein transferase activity	http://amigo.geneontology.org/amigo/term/GO:0051438	ABL1 FEM1A
0.129495	2	58	9.50602	GO:2000107 negative regulation of leukocyte apoptotic process	http://amigo.geneontology.org/amigo/term/GO:2000107	HIF1A ADA
0.131401	7	751	2.56954	GO:0006511 ubiquitin-dependent protein catabolic process	http://amigo.geneontology.org/amigo/term/GO:0006511	NEDD4 ITCH UBA1 CUL4A FEM1A CUL4B UBXN4
0.131401	5	425	3.24323	GO:0045786 negative regulation of cell cycle	http://amigo.geneontology.org/amigo/term/GO:0045786	NEK11 NSUN2 ABL1 CUL4A TPR
0.132178	2	59	9.34491	GO:0018023 peptidyl-lysine trimethylation	http://amigo.geneontology.org/amigo/term/GO:0018023	KDM4A KDM4C
0.132178	2	59	9.34491	GO:0048260 positive regulation of receptor-mediated endocytosis	http://amigo.geneontology.org/amigo/term/GO:0048260	HIP1 PPT1
0.132633	6	585	2.82743	GO:0010498 proteasomal protein catabolic process	http://amigo.geneontology.org/amigo/term/GO:0010498	NEDD4 ITCH CUL4A CUL4B FEM1A UBXN4
0.132633	2	60	9.18916	GO:0016574 histone ubiquitination	http://amigo.geneontology.org/amigo/term/GO:0016574	PCGF1 CUL4B
0.132633	4	284	3.88274	GO:0031330 negative regulation of cellular catabolic process	http://amigo.geneontology.org/amigo/term/GO:0031330	NSUN2 VPS35 TRAF5 KDM4A
0.132633	4	285	3.86912	GO:0031348 negative regulation of defense response	http://amigo.geneontology.org/amigo/term/GO:0031348	FEM1A ITCH ADA VPS35
0.132633	2	60	9.18916	GO:0046636 negative regulation of alpha-beta T cell activation	http://amigo.geneontology.org/amigo/term/GO:0046636	ITCH LOXL3
0.132633	12	1709	1.93569	GO:0046907 intracellular transport	http://amigo.geneontology.org/amigo/term/GO:0046907	TPR VPS35 VPS53 RAB43 VPS16 NSUN2 NEDD4 AP1B1 COG7 RIOK2 HIF1A SCAP
0.132633	9	1118	2.21921	GO:0051130 positive regulation of cellular component organization	http://amigo.geneontology.org/amigo/term/GO:0051130	ROR1 ABL1 HIF1A HIP1 PTPRD TPR VPS35 PPT1 FEN1
0.132633	4	285	3.86912	GO:0051348 negative regulation of transferase activity	http://amigo.geneontology.org/amigo/term/GO:0051348	ABL1 PIF1 PTPRT COX11
0.132633	8	935	2.35871	GO:0071345 cellular response to cytokine stimulus	http://amigo.geneontology.org/amigo/term/GO:0071345	TRAF5 TRAF3 TRAF6 HIF1A PTPRT TPR NPNT RAB43
0.132633	4	283	3.89646	GO:0090305 nucleic acid phosphodiester bond hydrolysis	http://amigo.geneontology.org/amigo/term/GO:0090305	EXD2 FEN1 HAUS7 BOP1
0.132633	2	60	9.18916	GO:1901976 regulation of cell cycle checkpoint	http://amigo.geneontology.org/amigo/term/GO:1901976	CUL4A TPR
0.132633	4	285	3.86912	GO:1901988 negative regulation of cell cycle phase transition	http://amigo.geneontology.org/amigo/term/GO:1901988	NEK11 NSUN2 CUL4A TPR
0.133328	11	1510	2.00823	GO:1901565 organonitrogen compound catabolic process	http://amigo.geneontology.org/amigo/term/GO:1901565	NEDD4 ITCH UBA1 PPT1 CUL4A FEM1A CUL4B ADA VPS35 UBXN4 MBD4
0.133758	1	6	45.9458	GO:0002248 connective tissue replacement involved in inflammatory response wound healing	http://amigo.geneontology.org/amigo/term/GO:0002248	HIF1A
0.133758	1	6	45.9458	GO:0002322 B cell proliferation involved in immune response	http://amigo.geneontology.org/amigo/term/GO:0002322	ABL1
0.133758	1	6	45.9458	GO:0002669 positive regulation of T cell anergy	http://amigo.geneontology.org/amigo/term/GO:0002669	ITCH
0.133758	1	6	45.9458	GO:0002913 positive regulation of lymphocyte anergy	http://amigo.geneontology.org/amigo/term/GO:0002913	ITCH
0.133758	2	62	8.89273	GO:0006940 regulation of smooth muscle contraction	http://amigo.geneontology.org/amigo/term/GO:0006940	NPNT ADA
0.133758	4	291	3.78934	GO:0007611 learning or memory	http://amigo.geneontology.org/amigo/term/GO:0007611	ABL1 HIF1A PPT1 FEN1
0.133758	1	6	45.9458	GO:0009172 purine deoxyribonucleoside monophosphate catabolic process	http://amigo.geneontology.org/amigo/term/GO:0009172	ADA
0.133758	1	6	45.9458	GO:0010694 positive regulation of alkaline phosphatase activity	http://amigo.geneontology.org/amigo/term/GO:0010694	NPNT
0.133758	1	6	45.9458	GO:0010793 regulation of mRNA export from nucleus	http://amigo.geneontology.org/amigo/term/GO:0010793	NSUN2
0.133758	7	761	2.53577	GO:0019941 modification-dependent protein catabolic process	http://amigo.geneontology.org/amigo/term/GO:0019941	NEDD4 ITCH UBA1 CUL4A FEM1A CUL4B UBXN4
0.133758	9	1124	2.20736	GO:0030163 protein catabolic process	http://amigo.geneontology.org/amigo/term/GO:0030163	NEDD4 ITCH UBA1 PPT1 CUL4A FEM1A CUL4B VPS35 UBXN4
0.133758	2	61	9.03851	GO:0032387 negative regulation of intracellular transport	http://amigo.geneontology.org/amigo/term/GO:0032387	TPR VPS35
0.133758	1	6	45.9458	GO:0032459 regulation of protein oligomerization	http://amigo.geneontology.org/amigo/term/GO:0032459	VPS35
0.133758	1	6	45.9458	GO:0034089 establishment of meiotic sister chromatid cohesion	http://amigo.geneontology.org/amigo/term/GO:0034089	SMC1A
0.133758	1	6	45.9458	GO:0043152 induction of bacterial agglutination	http://amigo.geneontology.org/amigo/term/GO:0043152	DMBT1
0.133758	1	6	45.9458	GO:0046121 deoxyribonucleoside catabolic process	http://amigo.geneontology.org/amigo/term/GO:0046121	ADA
0.133758	11	1522	1.99239	GO:0048699 generation of neurons	http://amigo.geneontology.org/amigo/term/GO:0048699	NEO1 NEDD4 ROR1 KDM4A ABL1 HIF1A PTPRQ PTPRF PTPRD CUL4B PPT1
0.133758	3	162	5.10509	GO:0050852 T cell receptor signaling pathway	http://amigo.geneontology.org/amigo/term/GO:0050852	ABL1 ADA TRAF6
0.133758	3	162	5.10509	GO:0050905 neuromuscular process	http://amigo.geneontology.org/amigo/term/GO:0050905	VPS35 ABL1 PTPRQ
0.133758	1	6	45.9458	GO:0061419 positive regulation of transcription from RNA polymerase II promoter in response to hypoxia	http://amigo.geneontology.org/amigo/term/GO:0061419	HIF1A
0.133758	1	6	45.9458	GO:0071321 cellular response to cGMP	http://amigo.geneontology.org/amigo/term/GO:0071321	PDE3A
0.133758	2	61	9.03851	GO:0097352 autophagosome maturation	http://amigo.geneontology.org/amigo/term/GO:0097352	SNX14 VPS16
0.133758	1	6	45.9458	GO:1903903 regulation of establishment of T cell polarity	http://amigo.geneontology.org/amigo/term/GO:1903903	ABL1
0.133758	1	6	45.9458	GO:1904528 positive regulation of microtubule binding	http://amigo.geneontology.org/amigo/term/GO:1904528	ABL1
0.133758	1	6	45.9458	GO:1904825 protein localization to microtubule plus-end	http://amigo.geneontology.org/amigo/term/GO:1904825	ABL1
0.133758	1	6	45.9458	GO:1905725 protein localization to microtubule end	http://amigo.geneontology.org/amigo/term/GO:1905725	ABL1
0.134603	12	1729	1.9133	GO:0007155 cell adhesion	http://amigo.geneontology.org/amigo/term/GO:0007155	NEO1 PTPRF PTPRD PTPRT ADA ITCH ABL1 VNN1 LOXL3 NPNT TRAF6 LMLN
0.135256	9	1138	2.1802	GO:0006259 DNA metabolic process	http://amigo.geneontology.org/amigo/term/GO:0006259	PIF1 EXD2 CUL4B FEN1 SMC1A ABL1 MBD4 CUL4A HAUS7
0.135256	7	772	2.49964	GO:0043632 modification-dependent macromolecule catabolic process	http://amigo.geneontology.org/amigo/term/GO:0043632	NEDD4 ITCH UBA1 CUL4A FEM1A CUL4B UBXN4
0.135256	2	63	8.75158	GO:0070231 T cell apoptotic process	http://amigo.geneontology.org/amigo/term/GO:0070231	HIF1A ADA
0.136664	12	1735	1.90668	GO:0002682 regulation of immune system process	http://amigo.geneontology.org/amigo/term/GO:0002682	NLRC4 HIF1A TRAF6 ITCH ABL1 VNN1 LOXL3 ZNFX1 TRAF3 CUL4A PTPRD ADA
0.138681	2	64	8.61483	GO:1902808 positive regulation of cell cycle G1/S phase transition	http://amigo.geneontology.org/amigo/term/GO:1902808	CUL4A CUL4B
0.1388	5	444	3.10444	GO:0010975 regulation of neuron projection development	http://amigo.geneontology.org/amigo/term/GO:0010975	NEDD4 ROR1 ABL1 PTPRF PTPRD
0.14028	5	447	3.08361	GO:0002831 regulation of response to biotic stimulus	http://amigo.geneontology.org/amigo/term/GO:0002831	ITCH ZNFX1 TRAF3 TRAF6 NLRC4
0.14028	24	4433	1.49249	GO:0019219 regulation of nucleobase-containing compound metabolic process	http://amigo.geneontology.org/amigo/term/GO:0019219	CDK13 TRAF5 HIF1A MED23 PCGF1 WDR75 TRAF3 SIM2 TRAF6 RIOK2 KDM4A NLRC4 KDM4C LOXL3 PIF1 PDE3A NSUN2 ITCH CUL4A NPNT TPR NEDD4 ROR1 ABL1
0.14028	4	298	3.70033	GO:0030522 intracellular receptor signaling pathway	http://amigo.geneontology.org/amigo/term/GO:0030522	NEDD4 ITCH KDM4C TRAF6
0.14028	4	298	3.70033	GO:0034612 response to tumor necrosis factor	http://amigo.geneontology.org/amigo/term/GO:0034612	TRAF5 TRAF3 TRAF6 NPNT
0.14028	2	65	8.4823	GO:0043112 receptor metabolic process	http://amigo.geneontology.org/amigo/term/GO:0043112	NEDD4 ITCH
0.14028	2	65	8.4823	GO:0043620 regulation of DNA-templated transcription in response to stress	http://amigo.geneontology.org/amigo/term/GO:0043620	HIF1A NEDD4
0.14028	2	65	8.4823	GO:0051353 positive regulation of oxidoreductase activity	http://amigo.geneontology.org/amigo/term/GO:0051353	ABL1 HIF1A
0.140612	9	1151	2.15558	GO:1901135 carbohydrate derivative metabolic process	http://amigo.geneontology.org/amigo/term/GO:1901135	PIGM MGAT2 ADA HIF1A DGAT1 SOAT1 COG7 MBD4 PPT1
0.140697	25	4676	1.47388	GO:1901362 organic cyclic compound biosynthetic process	http://amigo.geneontology.org/amigo/term/GO:1901362	COX15 CDK13 TRAF5 HIF1A MED23 PCGF1 WDR75 TRAF3 SIM2 TRAF6 ADA KDM4A NLRC4 KDM4C SCAP LOXL3 PIF1 VPS35 ITCH NPNT TPR NEDD4 ROR1 ABL1 PPT1
0.140697	1	7	39.3821	GO:0001842 neural fold formation	http://amigo.geneontology.org/amigo/term/GO:0001842	HIF1A
0.140697	4	301	3.66345	GO:0006470 protein dephosphorylation	http://amigo.geneontology.org/amigo/term/GO:0006470	PTPRF PTPRD PTPRT PTPRQ
0.140697	1	7	39.3821	GO:0009204 deoxyribonucleoside triphosphate catabolic process	http://amigo.geneontology.org/amigo/term/GO:0009204	ADA
0.140697	1	7	39.3821	GO:0009215 purine deoxyribonucleoside triphosphate metabolic process	http://amigo.geneontology.org/amigo/term/GO:0009215	ADA
0.140697	5	450	3.06305	GO:0009615 response to virus	http://amigo.geneontology.org/amigo/term/GO:0009615	TRAF3 HIF1A ITCH ZNFX1 DMBT1
0.140697	19	3283	1.59544	GO:0009892 negative regulation of metabolic process	http://amigo.geneontology.org/amigo/term/GO:0009892	PCGF1 ZNFX1 KDM4A ABL1 LOXL3 PIF1 PTPRT NSUN2 VPS35 TRAF5 HIF1A KDM4C SIM2 COX11 TPR NEDD4 TRAF6 SCAP ITCH
0.140697	3	172	4.80828	GO:0016241 regulation of macroautophagy	http://amigo.geneontology.org/amigo/term/GO:0016241	HIF1A VPS35 NEDD4
0.140697	5	454	3.03606	GO:0018205 peptidyl-lysine modification	http://amigo.geneontology.org/amigo/term/GO:0018205	LOXL3 NAA50 KDM6A KDM4A KDM4C
0.140697	6	616	2.68514	GO:0022407 regulation of cell-cell adhesion	http://amigo.geneontology.org/amigo/term/GO:0022407	ADA ITCH ABL1 VNN1 LOXL3 TRAF6
0.140697	1	7	39.3821	GO:0032364 oxygen homeostasis	http://amigo.geneontology.org/amigo/term/GO:0032364	HIF1A
0.140697	2	67	8.2291	GO:0032786 positive regulation of DNA-templated transcription elongation	http://amigo.geneontology.org/amigo/term/GO:0032786	CDK13 MED23
0.140697	1	7	39.3821	GO:0035519 protein K29-linked ubiquitination	http://amigo.geneontology.org/amigo/term/GO:0035519	ITCH
0.140697	1	7	39.3821	GO:0035666 TRIF-dependent toll-like receptor signaling pathway	http://amigo.geneontology.org/amigo/term/GO:0035666	TRAF3
0.140697	1	7	39.3821	GO:0045915 positive regulation of catecholamine metabolic process	http://amigo.geneontology.org/amigo/term/GO:0045915	VPS35
0.140697	1	7	39.3821	GO:0045964 positive regulation of dopamine metabolic process	http://amigo.geneontology.org/amigo/term/GO:0045964	VPS35
0.140697	1	7	39.3821	GO:0046053 dAMP metabolic process	http://amigo.geneontology.org/amigo/term/GO:0046053	ADA
0.140697	1	7	39.3821	GO:0046130 purine ribonucleoside catabolic process	http://amigo.geneontology.org/amigo/term/GO:0046130	ADA
0.140697	1	7	39.3821	GO:0048549 positive regulation of pinocytosis	http://amigo.geneontology.org/amigo/term/GO:0048549	PPT1
0.140697	5	454	3.03606	GO:0050808 synapse organization	http://amigo.geneontology.org/amigo/term/GO:0050808	NEDD4 PTPRF PTPRD VPS35 ABL1
0.140697	1	7	39.3821	GO:0050882 voluntary musculoskeletal movement	http://amigo.geneontology.org/amigo/term/GO:0050882	VPS35
0.140697	1	7	39.3821	GO:0051305 chromosome movement towards spindle pole	http://amigo.geneontology.org/amigo/term/GO:0051305	CENPE
0.140697	15	2388	1.73162	GO:0051649 establishment of localization in cell	http://amigo.geneontology.org/amigo/term/GO:0051649	TPR VPS35 VPS53 RAB43 VPS16 NSUN2 NEDD4 CENPE ABL1 AP1B1 HIF1A PPT1 COG7 RIOK2 SCAP
0.140697	1	7	39.3821	GO:0060405 regulation of penile erection	http://amigo.geneontology.org/amigo/term/GO:0060405	ADA
0.140697	2	66	8.35378	GO:0070228 regulation of lymphocyte apoptotic process	http://amigo.geneontology.org/amigo/term/GO:0070228	HIF1A ADA
0.140697	1	7	39.3821	GO:0070305 response to cGMP	http://amigo.geneontology.org/amigo/term/GO:0070305	PDE3A
0.140697	1	7	39.3821	GO:0072553 terminal button organization	http://amigo.geneontology.org/amigo/term/GO:0072553	VPS35
0.140697	1	7	39.3821	GO:0097272 ammonium homeostasis	http://amigo.geneontology.org/amigo/term/GO:0097272	RHBG
0.140697	1	7	39.3821	GO:1901033 positive regulation of response to reactive oxygen species	http://amigo.geneontology.org/amigo/term/GO:1901033	ABL1
0.140697	1	7	39.3821	GO:1902177 positive regulation of oxidative stress-induced intrinsic apoptotic signaling pathway	http://amigo.geneontology.org/amigo/term/GO:1902177	VNN1
0.140697	1	7	39.3821	GO:1905206 positive regulation of hydrogen peroxide-induced cell death	http://amigo.geneontology.org/amigo/term/GO:1905206	ABL1
0.140697	1	7	39.3821	GO:2000328 regulation of T-helper 17 cell lineage commitment	http://amigo.geneontology.org/amigo/term/GO:2000328	LOXL3
0.140697	1	7	39.3821	GO:2000646 positive regulation of receptor catabolic process	http://amigo.geneontology.org/amigo/term/GO:2000646	ITCH
0.141254	2	68	8.10808	GO:0010517 regulation of phospholipase activity	http://amigo.geneontology.org/amigo/term/GO:0010517	PPT1 ABL1
0.141254	2	68	8.10808	GO:0035567 non-canonical Wnt signaling pathway	http://amigo.geneontology.org/amigo/term/GO:0035567	ABL1 ROR1
0.141254	2	68	8.10808	GO:0048814 regulation of dendrite morphogenesis	http://amigo.geneontology.org/amigo/term/GO:0048814	NEDD4 PTPRD
0.141585	18	3073	1.61476	GO:0009605 response to external stimulus	http://amigo.geneontology.org/amigo/term/GO:0009605	NEO1 NLRC4 FEM1A DMBT1 TRAF3 HIF1A TRAF6 KDM4A ITCH ABL1 VNN1 ZNFX1 PTPRQ PTPRF NPNT RAB43 ADA VPS35
0.141871	9	1169	2.12239	GO:0048666 neuron development	http://amigo.geneontology.org/amigo/term/GO:0048666	NEO1 NEDD4 ROR1 ABL1 PTPRQ PTPRF PTPRD CUL4B PPT1
0.14398	2	69	7.99057	GO:0032623 interleukin-2 production	http://amigo.geneontology.org/amigo/term/GO:0032623	ABL1 TRAF6
0.14398	2	69	7.99057	GO:0032663 regulation of interleukin-2 production	http://amigo.geneontology.org/amigo/term/GO:0032663	ABL1 TRAF6
0.144799	12	1777	1.86162	GO:0048585 negative regulation of response to stimulus	http://amigo.geneontology.org/amigo/term/GO:0048585	FEM1A PDE3A ADA HIF1A PTPRT ITCH ABL1 LOXL3 RGS3 PTPRD VPS35 NEDD4
0.145723	8	986	2.23671	GO:0007017 microtubule-based process	http://amigo.geneontology.org/amigo/term/GO:0007017	TPR CENPE HAUS7 DCTN3 SMC1A ABL1 HIF1A FSIP2
0.146715	2	70	7.87642	GO:0030865 cortical cytoskeleton organization	http://amigo.geneontology.org/amigo/term/GO:0030865	FMNL2 FMNL3
0.146715	6	629	2.62965	GO:0051249 regulation of lymphocyte activation	http://amigo.geneontology.org/amigo/term/GO:0051249	ITCH ABL1 VNN1 LOXL3 TRAF6 ADA
0.147431	1	8	34.4593	GO:0002246 wound healing involved in inflammatory response	http://amigo.geneontology.org/amigo/term/GO:0002246	HIF1A
0.147431	1	8	34.4593	GO:0002314 germinal center B cell differentiation	http://amigo.geneontology.org/amigo/term/GO:0002314	ADA
0.147431	1	8	34.4593	GO:0002634 regulation of germinal center formation	http://amigo.geneontology.org/amigo/term/GO:0002634	ADA
0.147431	1	8	34.4593	GO:0006640 monoacylglycerol biosynthetic process	http://amigo.geneontology.org/amigo/term/GO:0006640	DGAT1
0.147431	6	634	2.60891	GO:0006897 endocytosis	http://amigo.geneontology.org/amigo/term/GO:0006897	NEDD4 HIP1 PPT1 ABL1 LOXL3 DMBT1
0.147431	1	8	34.4593	GO:0006975 DNA damage induced protein phosphorylation	http://amigo.geneontology.org/amigo/term/GO:0006975	ABL1
0.147431	1	8	34.4593	GO:0008063 Toll signaling pathway	http://amigo.geneontology.org/amigo/term/GO:0008063	TRAF3
0.147431	1	8	34.4593	GO:0010519 negative regulation of phospholipase activity	http://amigo.geneontology.org/amigo/term/GO:0010519	ABL1
0.147431	4	316	3.48955	GO:0010720 positive regulation of cell development	http://amigo.geneontology.org/amigo/term/GO:0010720	PDE3A HIF1A PTPRD ABL1
0.147431	3	181	4.56919	GO:0016571 histone methylation	http://amigo.geneontology.org/amigo/term/GO:0016571	KDM6A KDM4A KDM4C
0.147431	24	4513	1.46603	GO:0019438 aromatic compound biosynthetic process	http://amigo.geneontology.org/amigo/term/GO:0019438	COX15 CDK13 TRAF5 HIF1A MED23 PCGF1 WDR75 TRAF3 SIM2 TRAF6 ADA KDM4A NLRC4 KDM4C LOXL3 PIF1 VPS35 ITCH NPNT TPR NEDD4 ROR1 ABL1 PPT1
0.147431	4	315	3.50063	GO:0021700 developmental maturation	http://amigo.geneontology.org/amigo/term/GO:0021700	PDE3A NSUN2 HIF1A NOM1
0.147431	1	8	34.4593	GO:0030853 negative regulation of granulocyte differentiation	http://amigo.geneontology.org/amigo/term/GO:0030853	CUL4A
0.147431	3	179	4.62025	GO:0031503 protein-containing complex localization	http://amigo.geneontology.org/amigo/term/GO:0031503	VPS35 RIOK2 HIP1
0.147431	1	8	34.4593	GO:0032489 regulation of Cdc42 protein signal transduction	http://amigo.geneontology.org/amigo/term/GO:0032489	ABL1
0.147431	1	8	34.4593	GO:0032493 response to bacterial lipoprotein	http://amigo.geneontology.org/amigo/term/GO:0032493	DMBT1
0.147431	1	8	34.4593	GO:0033313 meiotic cell cycle checkpoint signaling	http://amigo.geneontology.org/amigo/term/GO:0033313	NSUN2
0.147431	2	71	7.76548	GO:0043489 RNA stabilization	http://amigo.geneontology.org/amigo/term/GO:0043489	NSUN2 TRAF5
0.147431	1	8	34.4593	GO:0045008 depyrimidination	http://amigo.geneontology.org/amigo/term/GO:0045008	MBD4
0.147431	1	8	34.4593	GO:0045542 positive regulation of cholesterol biosynthetic process	http://amigo.geneontology.org/amigo/term/GO:0045542	SCAP
0.147431	3	179	4.62025	GO:0051168 nuclear export	http://amigo.geneontology.org/amigo/term/GO:0051168	TPR NSUN2 RIOK2
0.147431	1	8	34.4593	GO:0051541 elastin metabolic process	http://amigo.geneontology.org/amigo/term/GO:0051541	HIF1A
0.147431	1	8	34.4593	GO:0070255 regulation of mucus secretion	http://amigo.geneontology.org/amigo/term/GO:0070255	ADA
0.147431	1	8	34.4593	GO:0072396 response to cell cycle checkpoint signaling	http://amigo.geneontology.org/amigo/term/GO:0072396	SMC1A
0.147431	1	8	34.4593	GO:0072402 response to DNA integrity checkpoint signaling	http://amigo.geneontology.org/amigo/term/GO:0072402	SMC1A
0.147431	1	8	34.4593	GO:0072423 response to DNA damage checkpoint signaling	http://amigo.geneontology.org/amigo/term/GO:0072423	SMC1A
0.147431	3	178	4.6462	GO:0090501 RNA phosphodiester bond hydrolysis	http://amigo.geneontology.org/amigo/term/GO:0090501	EXD2 FEN1 BOP1
0.147431	4	317	3.47855	GO:0097193 intrinsic apoptotic signaling pathway	http://amigo.geneontology.org/amigo/term/GO:0097193	HIF1A VNN1 ABL1 CUL4A
0.147431	1	8	34.4593	GO:0106120 positive regulation of sterol biosynthetic process	http://amigo.geneontology.org/amigo/term/GO:0106120	SCAP
0.147431	1	8	34.4593	GO:0106380 purine ribonucleotide salvage	http://amigo.geneontology.org/amigo/term/GO:0106380	ADA
0.147431	3	182	4.54409	GO:1902850 microtubule cytoskeleton organization involved in mitosis	http://amigo.geneontology.org/amigo/term/GO:1902850	TPR SMC1A CENPE
0.147431	1	8	34.4593	GO:1990264 peptidyl-tyrosine dephosphorylation involved in inactivation of protein kinase activity	http://amigo.geneontology.org/amigo/term/GO:1990264	PTPRT
0.147431	1	8	34.4593	GO:2000586 regulation of platelet-derived growth factor receptor-beta signaling pathway	http://amigo.geneontology.org/amigo/term/GO:2000586	HIP1
0.148026	2	73	7.55273	GO:0006406 mRNA export from nucleus	http://amigo.geneontology.org/amigo/term/GO:0006406	TPR NSUN2
0.148026	4	319	3.45674	GO:0030217 T cell differentiation	http://amigo.geneontology.org/amigo/term/GO:0030217	ABL1 VNN1 LOXL3 ADA
0.148026	2	73	7.55273	GO:0035019 somatic stem cell population maintenance	http://amigo.geneontology.org/amigo/term/GO:0035019	SMC1A CUL4A
0.149098	6	642	2.5764	GO:0007169 transmembrane receptor protein tyrosine kinase signaling pathway	http://amigo.geneontology.org/amigo/term/GO:0007169	HIF1A ABL1 ROR1 HIP1 PTPRT NEDD4
0.150024	4	321	3.4352	GO:0051091 positive regulation of DNA-binding transcription factor activity	http://amigo.geneontology.org/amigo/term/GO:0051091	TRAF5 TRAF6 NLRC4 ROR1
0.15051	6	644	2.5684	GO:0120035 regulation of plasma membrane bounded cell projection organization	http://amigo.geneontology.org/amigo/term/GO:0120035	NEDD4 ROR1 ABL1 PTPRF PTPRD VPS35
0.150675	2	74	7.45067	GO:0038093 Fc receptor signaling pathway	http://amigo.geneontology.org/amigo/term/GO:0038093	ABL1 TRAF6
0.150942	6	645	2.56442	GO:0034660 ncRNA metabolic process	http://amigo.geneontology.org/amigo/term/GO:0034660	NSUN2 MTREX RIOK2 RRP15 WDR75 BOP1
0.151533	1	9	30.6305	GO:0000056 ribosomal small subunit export from nucleus	http://amigo.geneontology.org/amigo/term/GO:0000056	RIOK2
0.151533	1	9	30.6305	GO:0000255 allantoin metabolic process	http://amigo.geneontology.org/amigo/term/GO:0000255	ADA
0.151533	1	9	30.6305	GO:0000301 retrograde transport vesicle recycling within Golgi	http://amigo.geneontology.org/amigo/term/GO:0000301	COG7
0.151533	2	75	7.35133	GO:0001736 establishment of planar polarity	http://amigo.geneontology.org/amigo/term/GO:0001736	ABL1 ROR1
0.151533	1	9	30.6305	GO:0002071 glandular epithelial cell maturation	http://amigo.geneontology.org/amigo/term/GO:0002071	HIF1A
0.151533	1	9	30.6305	GO:0002249 lymphocyte anergy	http://amigo.geneontology.org/amigo/term/GO:0002249	ITCH
0.151533	6	653	2.533	GO:0002521 leukocyte differentiation	http://amigo.geneontology.org/amigo/term/GO:0002521	TRAF6 ABL1 VNN1 LOXL3 CUL4A ADA
0.151533	1	9	30.6305	GO:0002667 regulation of T cell anergy	http://amigo.geneontology.org/amigo/term/GO:0002667	ITCH
0.151533	2	76	7.2546	GO:0002753 cytoplasmic pattern recognition receptor signaling pathway	http://amigo.geneontology.org/amigo/term/GO:0002753	ITCH TRAF6
0.151533	1	9	30.6305	GO:0002870 T cell anergy	http://amigo.geneontology.org/amigo/term/GO:0002870	ITCH
0.151533	1	9	30.6305	GO:0002911 regulation of lymphocyte anergy	http://amigo.geneontology.org/amigo/term/GO:0002911	ITCH
0.151533	1	9	30.6305	GO:0006152 purine nucleoside catabolic process	http://amigo.geneontology.org/amigo/term/GO:0006152	ADA
0.151533	4	330	3.34151	GO:0006401 RNA catabolic process	http://amigo.geneontology.org/amigo/term/GO:0006401	MTREX FEN1 NSUN2 TRAF5
0.151533	2	75	7.35133	GO:0007164 establishment of tissue polarity	http://amigo.geneontology.org/amigo/term/GO:0007164	ABL1 ROR1
0.151533	2	77	7.16038	GO:0007585 respiratory gaseous exchange by respiratory system	http://amigo.geneontology.org/amigo/term/GO:0007585	KDM6A COX15
0.151533	2	77	7.16038	GO:0009166 nucleotide catabolic process	http://amigo.geneontology.org/amigo/term/GO:0009166	ADA MBD4
0.151533	2	76	7.2546	GO:0009880 embryonic pattern specification	http://amigo.geneontology.org/amigo/term/GO:0009880	KDM6A SIM2
0.151533	1	9	30.6305	GO:0010692 regulation of alkaline phosphatase activity	http://amigo.geneontology.org/amigo/term/GO:0010692	NPNT
0.151533	5	478	2.88363	GO:0016032 viral process	http://amigo.geneontology.org/amigo/term/GO:0016032	ZNFX1 NEDD4 RAB43 ITCH MGAT2
0.151533	4	330	3.34151	GO:0022604 regulation of cell morphogenesis	http://amigo.geneontology.org/amigo/term/GO:0022604	FMNL2 FMNL3 PTPRD ABL1
0.151533	1	9	30.6305	GO:0032201 telomere maintenance via semi-conservative replication	http://amigo.geneontology.org/amigo/term/GO:0032201	FEN1
0.151533	1	9	30.6305	GO:0032906 transforming growth factor beta2 production	http://amigo.geneontology.org/amigo/term/GO:0032906	HIF1A
0.151533	1	9	30.6305	GO:0032909 regulation of transforming growth factor beta2 production	http://amigo.geneontology.org/amigo/term/GO:0032909	HIF1A
0.151533	1	9	30.6305	GO:0033240 positive regulation of cellular amine metabolic process	http://amigo.geneontology.org/amigo/term/GO:0033240	VPS35
0.151533	1	9	30.6305	GO:0034433 steroid esterification	http://amigo.geneontology.org/amigo/term/GO:0034433	SOAT1
0.151533	1	9	30.6305	GO:0034434 sterol esterification	http://amigo.geneontology.org/amigo/term/GO:0034434	SOAT1
0.151533	1	9	30.6305	GO:0034435 cholesterol esterification	http://amigo.geneontology.org/amigo/term/GO:0034435	SOAT1
0.151533	1	9	30.6305	GO:0036353 histone H2A-K119 monoubiquitination	http://amigo.geneontology.org/amigo/term/GO:0036353	PCGF1
0.151533	1	9	30.6305	GO:0036480 neuron intrinsic apoptotic signaling pathway in response to oxidative stress	http://amigo.geneontology.org/amigo/term/GO:0036480	HIF1A
0.151533	7	826	2.33623	GO:0043549 regulation of kinase activity	http://amigo.geneontology.org/amigo/term/GO:0043549	ROR1 ABL1 TRAF6 PTPRT COX11 MOB1B CENPE
0.151533	1	9	30.6305	GO:0045876 positive regulation of sister chromatid cohesion	http://amigo.geneontology.org/amigo/term/GO:0045876	FEN1
0.151533	1	9	30.6305	GO:0048537 mucosa-associated lymphoid tissue development	http://amigo.geneontology.org/amigo/term/GO:0048537	ADA
0.151533	1	9	30.6305	GO:0048541 Peyers patch development	http://amigo.geneontology.org/amigo/term/GO:0048541	ADA
0.151533	1	9	30.6305	GO:0050847 progesterone receptor signaling pathway	http://amigo.geneontology.org/amigo/term/GO:0050847	NEDD4
0.151533	11	1618	1.87418	GO:0051247 positive regulation of protein metabolic process	http://amigo.geneontology.org/amigo/term/GO:0051247	NEDD4 ITCH HIP1 MOB1B NLRC4 ABL1 TRAF6 CUL4B VPS35 SOAT1 CENPE
0.151533	1	9	30.6305	GO:0061072 iris morphogenesis	http://amigo.geneontology.org/amigo/term/GO:0061072	HIF1A
0.151533	6	655	2.52526	GO:0097190 apoptotic signaling pathway	http://amigo.geneontology.org/amigo/term/GO:0097190	HIF1A HIP1 VNN1 PDE3A ABL1 CUL4A
0.151533	1	9	30.6305	GO:0099545 trans-synaptic signaling by trans-synaptic complex	http://amigo.geneontology.org/amigo/term/GO:0099545	PTPRD
0.151533	1	9	30.6305	GO:0140627 ubiquitin-dependent protein catabolic process via the C-end degron rule pathway	http://amigo.geneontology.org/amigo/term/GO:0140627	FEM1A
0.151533	1	9	30.6305	GO:1903376 regulation of oxidative stress-induced neuron intrinsic apoptotic signaling pathway	http://amigo.geneontology.org/amigo/term/GO:1903376	HIF1A
0.151533	1	9	30.6305	GO:1905244 regulation of modification of synaptic structure	http://amigo.geneontology.org/amigo/term/GO:1905244	ABL1
0.151533	1	9	30.6305	GO:2000096 positive regulation of Wnt signaling pathway planar cell polarity pathway	http://amigo.geneontology.org/amigo/term/GO:2000096	ABL1
0.153121	6	659	2.50994	GO:0007610 behavior	http://amigo.geneontology.org/amigo/term/GO:0007610	VPS35 ABL1 HIF1A PPT1 FEN1 ADA
0.153361	2	78	7.06858	GO:0030199 collagen fibril organization	http://amigo.geneontology.org/amigo/term/GO:0030199	LOXL3 PTPRQ
0.153571	6	660	2.50613	GO:0031344 regulation of cell projection organization	http://amigo.geneontology.org/amigo/term/GO:0031344	NEDD4 ROR1 ABL1 PTPRF PTPRD VPS35
0.154353	10	1424	1.93592	GO:0051094 positive regulation of developmental process	http://amigo.geneontology.org/amigo/term/GO:0051094	PDE3A HIF1A TRAF6 KDM4A ABL1 VNN1 PTPRD NPNT ADA VPS35
0.154373	25	4823	1.42896	GO:0006810 transport	http://amigo.geneontology.org/amigo/term/GO:0006810	TPR SOAT1 VPS35 NEDD4 AP1B1 HIP1 PPT1 RHBG VPS53 COG7 CSN3 RAB43 MT-CO1 VPS16 NSUN2 ABL1 HIF1A LOXL3 SNX14 DMBT1 ADA COX15 RIOK2 SCAP AIMP1
0.154373	8	1032	2.13701	GO:0034097 response to cytokine	http://amigo.geneontology.org/amigo/term/GO:0034097	TRAF5 TRAF3 TRAF6 HIF1A PTPRT TPR NPNT RAB43
0.154373	6	662	2.49856	GO:0042110 T cell activation	http://amigo.geneontology.org/amigo/term/GO:0042110	ADA ITCH ABL1 VNN1 LOXL3 TRAF6
0.154373	2	79	6.97911	GO:0042273 ribosomal large subunit biogenesis	http://amigo.geneontology.org/amigo/term/GO:0042273	RRP15 BOP1
0.154373	2	79	6.97911	GO:0046637 regulation of alpha-beta T cell differentiation	http://amigo.geneontology.org/amigo/term/GO:0046637	LOXL3 ADA
0.154373	6	663	2.49479	GO:0048729 tissue morphogenesis	http://amigo.geneontology.org/amigo/term/GO:0048729	ABL1 HIF1A KDM6A NPNT TRAF6 ROR1
0.154373	22	4103	1.47815	GO:0065008 regulation of biological quality	http://amigo.geneontology.org/amigo/term/GO:0065008	NEDD4 RHBG FMNL2 FMNL3 CSN3 HIF1A HIP1 PTPRD COX11 NSUN2 SOAT1 NEO1 VPS35 TRAF5 ABL1 PPT1 TRAF6 DGAT1 ADA COG7 PDE3A AIMP1
0.154373	2	79	6.97911	GO:0097006 regulation of plasma lipoprotein particle levels	http://amigo.geneontology.org/amigo/term/GO:0097006	SOAT1 DGAT1
0.154947	3	194	4.26301	GO:0022900 electron transport chain	http://amigo.geneontology.org/amigo/term/GO:0022900	MT-CO1 COX11 COX15
0.157042	22	4112	1.47491	GO:0051252 regulation of RNA metabolic process	http://amigo.geneontology.org/amigo/term/GO:0051252	CDK13 TRAF5 HIF1A MED23 PCGF1 WDR75 TRAF3 SIM2 TRAF6 RIOK2 KDM4A NLRC4 KDM4C LOXL3 PDE3A NSUN2 ITCH NPNT TPR NEDD4 ROR1 ABL1
0.157149	4	341	3.23372	GO:0000377 RNA splicing via transesterification reactions with bulged adenosine as nucleophile	http://amigo.geneontology.org/amigo/term/GO:0000377	RBM41 RNPC3 MTREX CDK13
0.157149	4	341	3.23372	GO:0000398 mRNA splicing via spliceosome	http://amigo.geneontology.org/amigo/term/GO:0000398	RBM41 RNPC3 MTREX CDK13
0.157149	1	10	27.5675	GO:0002084 protein depalmitoylation	http://amigo.geneontology.org/amigo/term/GO:0002084	PPT1
0.157149	18	3183	1.55895	GO:0002376 immune system process	http://amigo.geneontology.org/amigo/term/GO:0002376	ADA NLRC4 HIF1A TRAF3 AIMP1 TRAF6 ITCH ABL1 VNN1 SCAP LOXL3 ZNFX1 PTPRQ CUL4A PTPRD RAB43 CDK13 DMBT1
0.157149	1	10	27.5675	GO:0009128 purine nucleoside monophosphate catabolic process	http://amigo.geneontology.org/amigo/term/GO:0009128	ADA
0.157149	1	10	27.5675	GO:0009155 purine deoxyribonucleotide catabolic process	http://amigo.geneontology.org/amigo/term/GO:0009155	ADA
0.157149	1	10	27.5675	GO:0009169 purine ribonucleoside monophosphate catabolic process	http://amigo.geneontology.org/amigo/term/GO:0009169	ADA
0.157149	1	10	27.5675	GO:0009170 purine deoxyribonucleoside monophosphate metabolic process	http://amigo.geneontology.org/amigo/term/GO:0009170	ADA
0.157149	2	81	6.80678	GO:0010822 positive regulation of mitochondrion organization	http://amigo.geneontology.org/amigo/term/GO:0010822	HIF1A VPS35
0.157149	4	337	3.2721	GO:0010948 negative regulation of cell cycle process	http://amigo.geneontology.org/amigo/term/GO:0010948	NEK11 NSUN2 CUL4A TPR
0.157149	1	10	27.5675	GO:0031666 positive regulation of lipopolysaccharide-mediated signaling pathway	http://amigo.geneontology.org/amigo/term/GO:0031666	TRAF6
0.157149	1	10	27.5675	GO:0032261 purine nucleotide salvage	http://amigo.geneontology.org/amigo/term/GO:0032261	ADA
0.157149	1	10	27.5675	GO:0033131 regulation of glucokinase activity	http://amigo.geneontology.org/amigo/term/GO:0033131	COX11
0.157149	1	10	27.5675	GO:0033483 gas homeostasis	http://amigo.geneontology.org/amigo/term/GO:0033483	HIF1A
0.157149	1	10	27.5675	GO:0043653 mitochondrial fragmentation involved in apoptotic process	http://amigo.geneontology.org/amigo/term/GO:0043653	VPS35
0.157149	13	2069	1.73213	GO:0043933 protein-containing complex organization	http://amigo.geneontology.org/amigo/term/GO:0043933	HIP1 SNX14 MED23 VPS16 CENPE VPS35 ABL1 COX15 TPR SOAT1 DGAT1 BOP1 NLRC4
0.157149	1	10	27.5675	GO:0046886 positive regulation of hormone biosynthetic process	http://amigo.geneontology.org/amigo/term/GO:0046886	HIF1A
0.157149	4	341	3.23372	GO:0051607 defense response to virus	http://amigo.geneontology.org/amigo/term/GO:0051607	TRAF3 ITCH ZNFX1 DMBT1
0.157149	7	852	2.26493	GO:0060341 regulation of cellular localization	http://amigo.geneontology.org/amigo/term/GO:0060341	NSUN2 TPR NEDD4 ABL1 HIF1A RIOK2 VPS35
0.157149	1	10	27.5675	GO:0070091 glucagon secretion	http://amigo.geneontology.org/amigo/term/GO:0070091	AIMP1
0.157149	1	10	27.5675	GO:0070092 regulation of glucagon secretion	http://amigo.geneontology.org/amigo/term/GO:0070092	AIMP1
0.157149	1	10	27.5675	GO:0098887 neurotransmitter receptor transport endosome to postsynaptic membrane	http://amigo.geneontology.org/amigo/term/GO:0098887	VPS35
0.157149	1	10	27.5675	GO:0099639 neurotransmitter receptor transport endosome to plasma membrane	http://amigo.geneontology.org/amigo/term/GO:0099639	VPS35
0.157149	1	10	27.5675	GO:1902884 positive regulation of response to oxidative stress	http://amigo.geneontology.org/amigo/term/GO:1902884	ABL1
0.157149	1	10	27.5675	GO:1904526 regulation of microtubule binding	http://amigo.geneontology.org/amigo/term/GO:1904526	ABL1
0.157149	1	10	27.5675	GO:1905165 regulation of lysosomal protein catabolic process	http://amigo.geneontology.org/amigo/term/GO:1905165	VPS35
0.157149	1	10	27.5675	GO:2001054 negative regulation of mesenchymal cell apoptotic process	http://amigo.geneontology.org/amigo/term/GO:2001054	HIF1A
0.157254	3	199	4.1559	GO:0019827 stem cell population maintenance	http://amigo.geneontology.org/amigo/term/GO:0019827	SMC1A KDM4C CUL4A
0.157254	2	82	6.72377	GO:0032456 endocytic recycling	http://amigo.geneontology.org/amigo/term/GO:0032456	VPS53 VPS35
0.157254	4	342	3.22427	GO:0140546 defense response to symbiont	http://amigo.geneontology.org/amigo/term/GO:0140546	TRAF3 ITCH ZNFX1 DMBT1
0.158595	3	200	4.13512	GO:0030324 lung development	http://amigo.geneontology.org/amigo/term/GO:0030324	LOXL3 SIM2 ADA
0.158595	3	200	4.13512	GO:0071478 cellular response to radiation	http://amigo.geneontology.org/amigo/term/GO:0071478	CUL4A CUL4B NEDD4
0.159155	2	83	6.64276	GO:0010770 positive regulation of cell morphogenesis involved in differentiation	http://amigo.geneontology.org/amigo/term/GO:0010770	PTPRD ABL1
0.159155	2	83	6.64276	GO:0031507 heterochromatin assembly	http://amigo.geneontology.org/amigo/term/GO:0031507	ZNFX1 TPR
0.159155	2	83	6.64276	GO:1902369 negative regulation of RNA catabolic process	http://amigo.geneontology.org/amigo/term/GO:1902369	NSUN2 TRAF5
0.159553	4	345	3.19623	GO:0000375 RNA splicing via transesterification reactions	http://amigo.geneontology.org/amigo/term/GO:0000375	RBM41 RNPC3 MTREX CDK13
0.159553	16	2748	1.60509	GO:0031324 negative regulation of cellular metabolic process	http://amigo.geneontology.org/amigo/term/GO:0031324	PCGF1 KDM4A ABL1 LOXL3 PIF1 PTPRT NSUN2 VPS35 TRAF5 HIF1A KDM4C SIM2 COX11 TPR NEDD4 TRAF6
0.159553	4	345	3.19623	GO:0042063 gliogenesis	http://amigo.geneontology.org/amigo/term/GO:0042063	KDM4A ABL1 CUL4B ROR1
0.160644	5	507	2.71869	GO:1903131 mononuclear cell differentiation	http://amigo.geneontology.org/amigo/term/GO:1903131	ABL1 VNN1 LOXL3 TRAF6 ADA
0.161147	2	84	6.56368	GO:0031060 regulation of histone methylation	http://amigo.geneontology.org/amigo/term/GO:0031060	KDM4A KDM4C
0.161147	2	84	6.56368	GO:0050688 regulation of defense response to virus	http://amigo.geneontology.org/amigo/term/GO:0050688	ITCH TRAF3
0.161424	4	347	3.17781	GO:0050890 cognition	http://amigo.geneontology.org/amigo/term/GO:0050890	ABL1 HIF1A PPT1 FEN1
0.161816	3	203	4.07401	GO:0098727 maintenance of cell number	http://amigo.geneontology.org/amigo/term/GO:0098727	SMC1A KDM4C CUL4A
0.162362	4	348	3.16867	GO:0050870 positive regulation of T cell activation	http://amigo.geneontology.org/amigo/term/GO:0050870	ABL1 VNN1 TRAF6 ADA
0.162754	6	689	2.40065	GO:0000226 microtubule cytoskeleton organization	http://amigo.geneontology.org/amigo/term/GO:0000226	TPR HAUS7 SMC1A ABL1 CENPE FSIP2
0.162754	1	11	25.0613	GO:0009120 deoxyribonucleoside metabolic process	http://amigo.geneontology.org/amigo/term/GO:0009120	ADA
0.162754	3	204	4.05404	GO:0030323 respiratory tube development	http://amigo.geneontology.org/amigo/term/GO:0030323	LOXL3 SIM2 ADA
0.162754	1	11	25.0613	GO:0031987 locomotion involved in locomotory behavior	http://amigo.geneontology.org/amigo/term/GO:0031987	VPS35
0.162754	1	11	25.0613	GO:0032429 regulation of phospholipase A2 activity	http://amigo.geneontology.org/amigo/term/GO:0032429	PPT1
0.162754	1	11	25.0613	GO:0034058 endosomal vesicle fusion	http://amigo.geneontology.org/amigo/term/GO:0034058	VPS16
0.162754	1	11	25.0613	GO:0043084 penile erection	http://amigo.geneontology.org/amigo/term/GO:0043084	ADA
0.162754	3	205	4.03426	GO:0045089 positive regulation of innate immune response	http://amigo.geneontology.org/amigo/term/GO:0045089	ZNFX1 NLRC4 TRAF6
0.162754	1	11	25.0613	GO:0046085 adenosine metabolic process	http://amigo.geneontology.org/amigo/term/GO:0046085	ADA
0.162754	1	11	25.0613	GO:0048570 notochord morphogenesis	http://amigo.geneontology.org/amigo/term/GO:0048570	KDM6A
0.162754	2	85	6.48646	GO:0051865 protein autoubiquitination	http://amigo.geneontology.org/amigo/term/GO:0051865	TRAF6 ITCH
0.162754	1	11	25.0613	GO:0060020 Bergmann glial cell differentiation	http://amigo.geneontology.org/amigo/term/GO:0060020	ABL1
0.162754	1	11	25.0613	GO:0060159 regulation of dopamine receptor signaling pathway	http://amigo.geneontology.org/amigo/term/GO:0060159	VPS35
0.162754	1	11	25.0613	GO:0070099 regulation of chemokine-mediated signaling pathway	http://amigo.geneontology.org/amigo/term/GO:0070099	HIF1A
0.162754	2	85	6.48646	GO:0070227 lymphocyte apoptotic process	http://amigo.geneontology.org/amigo/term/GO:0070227	HIF1A ADA
0.162754	1	11	25.0613	GO:0097709 connective tissue replacement	http://amigo.geneontology.org/amigo/term/GO:0097709	HIF1A
0.162754	1	11	25.0613	GO:1901298 regulation of hydrogen peroxide-mediated programmed cell death	http://amigo.geneontology.org/amigo/term/GO:1901298	ABL1
0.162754	1	11	25.0613	GO:1902950 regulation of dendritic spine maintenance	http://amigo.geneontology.org/amigo/term/GO:1902950	VPS35
0.162754	1	11	25.0613	GO:1903299 regulation of hexokinase activity	http://amigo.geneontology.org/amigo/term/GO:1903299	COX11
0.162754	1	11	25.0613	GO:2000320 negative regulation of T-helper 17 cell differentiation	http://amigo.geneontology.org/amigo/term/GO:2000320	LOXL3
0.162754	1	11	25.0613	GO:2000644 regulation of receptor catabolic process	http://amigo.geneontology.org/amigo/term/GO:2000644	ITCH
0.164289	2	87	6.33735	GO:0002312 B cell activation involved in immune response	http://amigo.geneontology.org/amigo/term/GO:0002312	ABL1 ADA
0.164289	4	354	3.11497	GO:0006913 nucleocytoplasmic transport	http://amigo.geneontology.org/amigo/term/GO:0006913	TPR NSUN2 NEDD4 RIOK2
0.164289	2	87	6.33735	GO:0014068 positive regulation of phosphatidylinositol 3-kinase signaling	http://amigo.geneontology.org/amigo/term/GO:0014068	ROR1 NEDD4
0.164289	2	87	6.33735	GO:0042274 ribosomal small subunit biogenesis	http://amigo.geneontology.org/amigo/term/GO:0042274	RIOK2 NOM1
0.164289	4	354	3.11497	GO:0051169 nuclear transport	http://amigo.geneontology.org/amigo/term/GO:0051169	TPR NSUN2 NEDD4 RIOK2
0.164289	2	87	6.33735	GO:1901292 nucleoside phosphate catabolic process	http://amigo.geneontology.org/amigo/term/GO:1901292	ADA MBD4
0.164555	3	208	3.97608	GO:0050851 antigen receptor-mediated signaling pathway	http://amigo.geneontology.org/amigo/term/GO:0050851	ABL1 ADA TRAF6
0.164984	22	4181	1.45057	GO:0009893 positive regulation of metabolic process	http://amigo.geneontology.org/amigo/term/GO:0009893	CDK13 NEDD4 ITCH MED23 WDR75 HIP1 MOB1B ROR1 NLRC4 HIF1A RIOK2 VPS35 ABL1 SCAP TRAF6 KDM4A TRAF5 KDM6A CUL4B NPNT SOAT1 CENPE
0.164984	4	355	3.10619	GO:0030198 extracellular matrix organization	http://amigo.geneontology.org/amigo/term/GO:0030198	LOXL3 ABL1 PTPRQ NPNT
0.165483	1	12	22.9729	GO:0002069 columnar/cuboidal epithelial cell maturation	http://amigo.geneontology.org/amigo/term/GO:0002069	HIF1A
0.165483	1	12	22.9729	GO:0006285 base-excision repair AP site formation	http://amigo.geneontology.org/amigo/term/GO:0006285	MBD4
0.165483	2	90	6.1261	GO:0006513 protein monoubiquitination	http://amigo.geneontology.org/amigo/term/GO:0006513	PCGF1 CUL4B
0.165483	2	91	6.05878	GO:0006919 activation of cysteine-type endopeptidase activity involved in apoptotic process	http://amigo.geneontology.org/amigo/term/GO:0006919	HIP1 NLRC4
0.165483	3	214	3.8646	GO:0009060 aerobic respiration	http://amigo.geneontology.org/amigo/term/GO:0009060	MT-CO1 HIF1A COX15
0.165483	1	12	22.9729	GO:0009113 purine nucleobase biosynthetic process	http://amigo.geneontology.org/amigo/term/GO:0009113	ADA
0.165483	1	12	22.9729	GO:0009143 nucleoside triphosphate catabolic process	http://amigo.geneontology.org/amigo/term/GO:0009143	ADA
0.165483	1	12	22.9729	GO:0009650 UV protection	http://amigo.geneontology.org/amigo/term/GO:0009650	FEN1
0.165483	4	363	3.03774	GO:0009895 negative regulation of catabolic process	http://amigo.geneontology.org/amigo/term/GO:0009895	NSUN2 VPS35 TRAF5 KDM4A
0.165483	1	12	22.9729	GO:0030948 negative regulation of vascular endothelial growth factor receptor signaling pathway	http://amigo.geneontology.org/amigo/term/GO:0030948	NEDD4
0.165483	4	361	3.05457	GO:0031647 regulation of protein stability	http://amigo.geneontology.org/amigo/term/GO:0031647	CSN3 HIP1 VPS35 COG7
0.165483	3	210	3.93821	GO:0032388 positive regulation of intracellular transport	http://amigo.geneontology.org/amigo/term/GO:0032388	NEDD4 TPR RIOK2
0.165483	1	12	22.9729	GO:0032525 somite rostral/caudal axis specification	http://amigo.geneontology.org/amigo/term/GO:0032525	KDM6A
0.165483	2	91	6.05878	GO:0033627 cell adhesion mediated by integrin	http://amigo.geneontology.org/amigo/term/GO:0033627	ADA NPNT
0.165483	1	12	22.9729	GO:0033632 regulation of cell-cell adhesion mediated by integrin	http://amigo.geneontology.org/amigo/term/GO:0033632	ADA
0.165483	5	528	2.61056	GO:0033674 positive regulation of kinase activity	http://amigo.geneontology.org/amigo/term/GO:0033674	ROR1 ABL1 TRAF6 MOB1B CENPE
0.165483	1	12	22.9729	GO:0042416 dopamine biosynthetic process	http://amigo.geneontology.org/amigo/term/GO:0042416	VPS35
0.165483	1	12	22.9729	GO:0042451 purine nucleoside biosynthetic process	http://amigo.geneontology.org/amigo/term/GO:0042451	ADA
0.165483	1	12	22.9729	GO:0042455 ribonucleoside biosynthetic process	http://amigo.geneontology.org/amigo/term/GO:0042455	ADA
0.165483	3	214	3.8646	GO:0042770 signal transduction in response to DNA damage	http://amigo.geneontology.org/amigo/term/GO:0042770	NEK11 ABL1 CUL4A
0.165483	4	356	3.09747	GO:0043062 extracellular structure organization	http://amigo.geneontology.org/amigo/term/GO:0043062	LOXL3 ABL1 PTPRQ NPNT
0.165483	5	528	2.61056	GO:0043410 positive regulation of MAPK cascade	http://amigo.geneontology.org/amigo/term/GO:0043410	TRAF5 TRAF3 TRAF6 ABL1 NPNT
0.165483	1	12	22.9729	GO:0043619 regulation of transcription from RNA polymerase II promoter in response to oxidative stress	http://amigo.geneontology.org/amigo/term/GO:0043619	HIF1A
0.165483	4	359	3.07158	GO:0045229 external encapsulating structure organization	http://amigo.geneontology.org/amigo/term/GO:0045229	LOXL3 ABL1 PTPRQ NPNT
0.165483	1	12	22.9729	GO:0046129 purine ribonucleoside biosynthetic process	http://amigo.geneontology.org/amigo/term/GO:0046129	ADA
0.165483	1	12	22.9729	GO:0048548 regulation of pinocytosis	http://amigo.geneontology.org/amigo/term/GO:0048548	PPT1
0.165483	7	880	2.19287	GO:0051603 proteolysis involved in cellular protein catabolic process	http://amigo.geneontology.org/amigo/term/GO:0051603	NEDD4 ITCH UBA1 CUL4A FEM1A CUL4B UBXN4
0.165483	2	89	6.19494	GO:0055072 iron ion homeostasis	http://amigo.geneontology.org/amigo/term/GO:0055072	NEO1 HIF1A
0.165483	2	90	6.1261	GO:0060191 regulation of lipase activity	http://amigo.geneontology.org/amigo/term/GO:0060191	PPT1 ABL1
0.165483	2	90	6.1261	GO:0061053 somite development	http://amigo.geneontology.org/amigo/term/GO:0061053	LOXL3 KDM6A
0.165483	1	12	22.9729	GO:0070601 centromeric sister chromatid cohesion	http://amigo.geneontology.org/amigo/term/GO:0070601	NAA50
0.165483	2	91	6.05878	GO:0070828 heterochromatin organization	http://amigo.geneontology.org/amigo/term/GO:0070828	ZNFX1 TPR
0.165483	6	697	2.3731	GO:0071363 cellular response to growth factor stimulus	http://amigo.geneontology.org/amigo/term/GO:0071363	HIF1A NEO1 ABL1 NPNT PDE3A NEDD4
0.165483	1	12	22.9729	GO:0072488 ammonium transmembrane transport	http://amigo.geneontology.org/amigo/term/GO:0072488	RHBG
0.165483	1	12	22.9729	GO:0090085 regulation of protein deubiquitination	http://amigo.geneontology.org/amigo/term/GO:0090085	ITCH
0.165483	1	12	22.9729	GO:0090232 positive regulation of spindle checkpoint	http://amigo.geneontology.org/amigo/term/GO:0090232	TPR
0.165483	1	12	22.9729	GO:0090267 positive regulation of mitotic cell cycle spindle assembly checkpoint	http://amigo.geneontology.org/amigo/term/GO:0090267	TPR
0.165483	2	90	6.1261	GO:0090307 mitotic spindle assembly	http://amigo.geneontology.org/amigo/term/GO:0090307	TPR SMC1A
0.165483	1	12	22.9729	GO:0099151 regulation of postsynaptic density assembly	http://amigo.geneontology.org/amigo/term/GO:0099151	PTPRD
0.165483	1	12	22.9729	GO:1900121 negative regulation of receptor binding	http://amigo.geneontology.org/amigo/term/GO:1900121	PTPRF
0.165483	6	701	2.35956	GO:1901137 carbohydrate derivative biosynthetic process	http://amigo.geneontology.org/amigo/term/GO:1901137	PIGM MGAT2 ADA SOAT1 COG7 PPT1
0.165483	2	88	6.26533	GO:1901568 fatty acid derivative metabolic process	http://amigo.geneontology.org/amigo/term/GO:1901568	DGAT1 PPT1
0.165483	3	214	3.8646	GO:1902107 positive regulation of leukocyte differentiation	http://amigo.geneontology.org/amigo/term/GO:1902107	TRAF6 VNN1 ADA
0.165483	2	89	6.19494	GO:1903350 response to dopamine	http://amigo.geneontology.org/amigo/term/GO:1903350	VPS35 ABL1
0.165483	2	88	6.26533	GO:1903351 cellular response to dopamine	http://amigo.geneontology.org/amigo/term/GO:1903351	VPS35 ABL1
0.165483	3	214	3.8646	GO:1903708 positive regulation of hemopoiesis	http://amigo.geneontology.org/amigo/term/GO:1903708	TRAF6 VNN1 ADA
0.165483	1	12	22.9729	GO:1904350 regulation of protein catabolic process in the vacuole	http://amigo.geneontology.org/amigo/term/GO:1904350	VPS35
0.165483	1	12	22.9729	GO:2000317 negative regulation of T-helper 17 type immune response	http://amigo.geneontology.org/amigo/term/GO:2000317	LOXL3
0.166099	4	364	3.02939	GO:1901214 regulation of neuron death	http://amigo.geneontology.org/amigo/term/GO:1901214	HIF1A VPS35 ABL1 PPT1
0.166361	18	3269	1.51794	GO:0010033 response to organic substance	http://amigo.geneontology.org/amigo/term/GO:0010033	TRAF5 TRAF3 TRAF6 DMBT1 HIF1A TPR VPS35 NEDD4 PDE3A PTPRT ADA NEO1 ABL1 SCAP UBXN4 NPNT RAB43 KDM4C
0.166361	5	530	2.6007	GO:0060284 regulation of cell development	http://amigo.geneontology.org/amigo/term/GO:0060284	PDE3A KDM4A HIF1A PTPRD ABL1
0.16827	1	13	21.2057	GO:0001973 G protein-coupled adenosine receptor signaling pathway	http://amigo.geneontology.org/amigo/term/GO:0001973	ADA
0.16827	1	13	21.2057	GO:0002327 immature B cell differentiation	http://amigo.geneontology.org/amigo/term/GO:0002327	ABL1
0.16827	3	217	3.81117	GO:0002822 regulation of adaptive immune response based on somatic recombination of immune receptors built from immunoglobulin superfamily domains	http://amigo.geneontology.org/amigo/term/GO:0002822	LOXL3 ADA TRAF6
0.16827	1	13	21.2057	GO:0010421 hydrogen peroxide-mediated programmed cell death	http://amigo.geneontology.org/amigo/term/GO:0010421	ABL1
0.16827	1	13	21.2057	GO:0010454 negative regulation of cell fate commitment	http://amigo.geneontology.org/amigo/term/GO:0010454	LOXL3
0.16827	17	3057	1.53303	GO:0010605 negative regulation of macromolecule metabolic process	http://amigo.geneontology.org/amigo/term/GO:0010605	PCGF1 ZNFX1 KDM4A ABL1 LOXL3 PIF1 PTPRT NSUN2 VPS35 TRAF5 KDM4C SIM2 TPR NEDD4 HIF1A TRAF6 ITCH
0.16827	1	13	21.2057	GO:0016078 tRNA catabolic process	http://amigo.geneontology.org/amigo/term/GO:0016078	NSUN2
0.16827	4	367	3.00463	GO:0019058 viral life cycle	http://amigo.geneontology.org/amigo/term/GO:0019058	ZNFX1 NEDD4 RAB43 ITCH
0.16827	2	94	5.86542	GO:0019915 lipid storage	http://amigo.geneontology.org/amigo/term/GO:0019915	DGAT1 SOAT1
0.16827	3	220	3.7592	GO:0030100 regulation of endocytosis	http://amigo.geneontology.org/amigo/term/GO:0030100	HIP1 PPT1 ABL1
0.16827	23	4482	1.41466	GO:0031326 regulation of cellular biosynthetic process	http://amigo.geneontology.org/amigo/term/GO:0031326	CDK13 TRAF5 HIF1A MED23 PCGF1 WDR75 TRAF3 SIM2 TRAF6 KDM4A NLRC4 KDM4C LOXL3 PIF1 VPS35 ITCH SCAP NPNT TPR SOAT1 NEDD4 ROR1 ABL1
0.16827	1	13	21.2057	GO:0033690 positive regulation of osteoblast proliferation	http://amigo.geneontology.org/amigo/term/GO:0033690	ABL1
0.16827	2	94	5.86542	GO:0034243 regulation of transcription elongation from RNA polymerase II promoter	http://amigo.geneontology.org/amigo/term/GO:0034243	CDK13 MED23
0.16827	7	902	2.13938	GO:0035239 tube morphogenesis	http://amigo.geneontology.org/amigo/term/GO:0035239	HIF1A ABL1 KDM6A FMNL3 AIMP1 NPNT TRAF6
0.16827	1	13	21.2057	GO:0035542 regulation of SNARE complex assembly	http://amigo.geneontology.org/amigo/term/GO:0035542	VPS16
0.16827	1	13	21.2057	GO:0035588 G protein-coupled purinergic receptor signaling pathway	http://amigo.geneontology.org/amigo/term/GO:0035588	ADA
0.16827	1	13	21.2057	GO:0042541 hemoglobin biosynthetic process	http://amigo.geneontology.org/amigo/term/GO:0042541	HIF1A
0.16827	1	13	21.2057	GO:0042921 glucocorticoid receptor signaling pathway	http://amigo.geneontology.org/amigo/term/GO:0042921	NEDD4
0.16827	4	368	2.99646	GO:0043414 macromolecule methylation	http://amigo.geneontology.org/amigo/term/GO:0043414	NSUN2 KDM6A KDM4A KDM4C
0.16827	1	13	21.2057	GO:0043951 negative regulation of cAMP-mediated signaling	http://amigo.geneontology.org/amigo/term/GO:0043951	PDE3A
0.16827	11	1718	1.76509	GO:0044093 positive regulation of molecular function	http://amigo.geneontology.org/amigo/term/GO:0044093	TRAF5 HIP1 TBCK TRAF6 ROR1 NLRC4 ABL1 NPNT MOB1B HIF1A CENPE
0.16827	1	13	21.2057	GO:0051974 negative regulation of telomerase activity	http://amigo.geneontology.org/amigo/term/GO:0051974	PIF1
0.16827	1	13	21.2057	GO:0060700 regulation of ribonuclease activity	http://amigo.geneontology.org/amigo/term/GO:0060700	PDE3A
0.16827	1	13	21.2057	GO:0070254 mucus secretion	http://amigo.geneontology.org/amigo/term/GO:0070254	ADA
0.16827	1	13	21.2057	GO:0097105 presynaptic membrane assembly	http://amigo.geneontology.org/amigo/term/GO:0097105	PTPRD
0.16827	1	13	21.2057	GO:0097576 vacuole fusion	http://amigo.geneontology.org/amigo/term/GO:0097576	VPS16
0.16827	1	13	21.2057	GO:0099150 regulation of postsynaptic specialization assembly	http://amigo.geneontology.org/amigo/term/GO:0099150	PTPRD
0.16827	2	94	5.86542	GO:0099175 regulation of postsynapse organization	http://amigo.geneontology.org/amigo/term/GO:0099175	PTPRD VPS35
0.16827	1	13	21.2057	GO:1902931 negative regulation of alcohol biosynthetic process	http://amigo.geneontology.org/amigo/term/GO:1902931	SCAP
0.16827	1	13	21.2057	GO:1903599 positive regulation of autophagy of mitochondrion	http://amigo.geneontology.org/amigo/term/GO:1903599	HIF1A
0.16827	1	13	21.2057	GO:2000650 negative regulation of sodium ion transmembrane transporter activity	http://amigo.geneontology.org/amigo/term/GO:2000650	NEDD4
0.16827	1	13	21.2057	GO:2001046 positive regulation of integrin-mediated signaling pathway	http://amigo.geneontology.org/amigo/term/GO:2001046	LOXL3
0.16827	1	13	21.2057	GO:2001053 regulation of mesenchymal cell apoptotic process	http://amigo.geneontology.org/amigo/term/GO:2001053	HIF1A
0.168584	8	1102	2.00127	GO:0045087 innate immune response	http://amigo.geneontology.org/amigo/term/GO:0045087	TRAF3 ITCH NLRC4 VNN1 ZNFX1 RAB43 TRAF6 DMBT1
0.168893	6	719	2.30048	GO:0043408 regulation of MAPK cascade	http://amigo.geneontology.org/amigo/term/GO:0043408	TRAF5 TRAF3 TRAF6 ITCH ABL1 NPNT
0.168893	3	221	3.74219	GO:1901888 regulation of cell junction assembly	http://amigo.geneontology.org/amigo/term/GO:1901888	PTPRD ABL1 VPS35
0.169222	2	95	5.80368	GO:0001942 hair follicle development	http://amigo.geneontology.org/amigo/term/GO:0001942	NSUN2 NOM1
0.169222	2	95	5.80368	GO:0006405 RNA export from nucleus	http://amigo.geneontology.org/amigo/term/GO:0006405	TPR NSUN2
0.170519	2	97	5.68401	GO:0001738 morphogenesis of a polarized epithelium	http://amigo.geneontology.org/amigo/term/GO:0001738	ABL1 ROR1
0.170519	3	226	3.6594	GO:0002285 lymphocyte activation involved in immune response	http://amigo.geneontology.org/amigo/term/GO:0002285	ABL1 LOXL3 ADA
0.170519	1	14	19.691	GO:0002467 germinal center formation	http://amigo.geneontology.org/amigo/term/GO:0002467	ADA
0.170519	6	724	2.2846	GO:0002694 regulation of leukocyte activation	http://amigo.geneontology.org/amigo/term/GO:0002694	ITCH ABL1 VNN1 LOXL3 TRAF6 ADA
0.170519	1	14	19.691	GO:0002903 negative regulation of B cell apoptotic process	http://amigo.geneontology.org/amigo/term/GO:0002903	ADA
0.170519	1	14	19.691	GO:0006287 base-excision repair gap-filling	http://amigo.geneontology.org/amigo/term/GO:0006287	FEN1
0.170519	3	224	3.69207	GO:0006479 protein methylation	http://amigo.geneontology.org/amigo/term/GO:0006479	KDM6A KDM4A KDM4C
0.170519	1	14	19.691	GO:0006999 nuclear pore organization	http://amigo.geneontology.org/amigo/term/GO:0006999	TPR
0.170519	3	224	3.69207	GO:0008213 protein alkylation	http://amigo.geneontology.org/amigo/term/GO:0008213	KDM6A KDM4A KDM4C
0.170519	1	14	19.691	GO:0009159 deoxyribonucleoside monophosphate catabolic process	http://amigo.geneontology.org/amigo/term/GO:0009159	ADA
0.170519	9	1312	1.89106	GO:0010628 positive regulation of gene expression	http://amigo.geneontology.org/amigo/term/GO:0010628	MED23 NLRC4 VPS35 HIF1A KDM4A TRAF5 ABL1 KDM6A TRAF6
0.170519	23	4503	1.40807	GO:0018130 heterocycle biosynthetic process	http://amigo.geneontology.org/amigo/term/GO:0018130	COX15 CDK13 TRAF5 HIF1A MED23 PCGF1 WDR75 TRAF3 SIM2 TRAF6 ADA KDM4A NLRC4 KDM4C LOXL3 PIF1 ITCH NPNT TPR NEDD4 ROR1 ABL1 PPT1
0.170519	1	14	19.691	GO:0018158 protein oxidation	http://amigo.geneontology.org/amigo/term/GO:0018158	LOXL3
0.170519	2	98	5.62601	GO:0022404 molting cycle process	http://amigo.geneontology.org/amigo/term/GO:0022404	NSUN2 NOM1
0.170519	2	98	5.62601	GO:0022405 hair cycle process	http://amigo.geneontology.org/amigo/term/GO:0022405	NSUN2 NOM1
0.170519	1	14	19.691	GO:0030949 positive regulation of vascular endothelial growth factor receptor signaling pathway	http://amigo.geneontology.org/amigo/term/GO:0030949	HIF1A
0.170519	4	377	2.92493	GO:0031349 positive regulation of defense response	http://amigo.geneontology.org/amigo/term/GO:0031349	NLRC4 ZNFX1 FEM1A TRAF6
0.170519	1	14	19.691	GO:0031958 corticosteroid receptor signaling pathway	http://amigo.geneontology.org/amigo/term/GO:0031958	NEDD4
0.170519	4	378	2.91719	GO:0032943 mononuclear cell proliferation	http://amigo.geneontology.org/amigo/term/GO:0032943	ITCH ABL1 TRAF6 ADA
0.170519	1	14	19.691	GO:0042983 amyloid precursor protein biosynthetic process	http://amigo.geneontology.org/amigo/term/GO:0042983	SOAT1
0.170519	1	14	19.691	GO:0042984 regulation of amyloid precursor protein biosynthetic process	http://amigo.geneontology.org/amigo/term/GO:0042984	SOAT1
0.170519	1	14	19.691	GO:0043101 purine-containing compound salvage	http://amigo.geneontology.org/amigo/term/GO:0043101	ADA
0.170519	3	227	3.64328	GO:0043523 regulation of neuron apoptotic process	http://amigo.geneontology.org/amigo/term/GO:0043523	HIF1A ABL1 PPT1
0.170519	2	96	5.74322	GO:0045814 negative regulation of gene expression epigenetic	http://amigo.geneontology.org/amigo/term/GO:0045814	ZNFX1 TPR
0.170519	4	374	2.94839	GO:0046651 lymphocyte proliferation	http://amigo.geneontology.org/amigo/term/GO:0046651	ITCH ABL1 TRAF6 ADA
0.170519	20	3774	1.46092	GO:0048513 animal organ development	http://amigo.geneontology.org/amigo/term/GO:0048513	KDM6A CSN3 HIF1A LOXL3 TRAF6 NSUN2 ABL1 AP1B1 VNN1 PTPRQ CUL4A NOM1 SIM2 NPNT ROR1 ADA MT-CO1 CDK13 PPT1 ITCH
0.170519	1	14	19.691	GO:0048712 negative regulation of astrocyte differentiation	http://amigo.geneontology.org/amigo/term/GO:0048712	KDM4A
0.170519	3	225	3.67566	GO:0060541 respiratory system development	http://amigo.geneontology.org/amigo/term/GO:0060541	LOXL3 SIM2 ADA
0.170519	8	1112	1.98327	GO:0060548 negative regulation of cell death	http://amigo.geneontology.org/amigo/term/GO:0060548	HIF1A PPT1 KDM4A VPS35 ABL1 PDE3A ADA ITCH
0.170519	1	14	19.691	GO:0060576 intestinal epithelial cell development	http://amigo.geneontology.org/amigo/term/GO:0060576	HIF1A
0.170519	1	14	19.691	GO:0061418 regulation of transcription from RNA polymerase II promoter in response to hypoxia	http://amigo.geneontology.org/amigo/term/GO:0061418	HIF1A
0.170519	1	14	19.691	GO:0070914 UV-damage excision repair	http://amigo.geneontology.org/amigo/term/GO:0070914	CUL4B
0.170519	15	2618	1.5795	GO:0071702 organic substance transport	http://amigo.geneontology.org/amigo/term/GO:0071702	TPR VPS35 RAB43 AP1B1 NSUN2 HIF1A SNX14 VPS53 COG7 DMBT1 VPS16 PPT1 NEDD4 AIMP1 HIP1
0.170519	1	14	19.691	GO:0072540 T-helper 17 cell lineage commitment	http://amigo.geneontology.org/amigo/term/GO:0072540	LOXL3
0.170519	1	14	19.691	GO:0090205 positive regulation of cholesterol metabolic process	http://amigo.geneontology.org/amigo/term/GO:0090205	SCAP
0.170519	2	97	5.68401	GO:0090277 positive regulation of peptide hormone secretion	http://amigo.geneontology.org/amigo/term/GO:0090277	HIF1A AIMP1
0.170519	2	98	5.62601	GO:0090502 RNA phosphodiester bond hydrolysis endonucleolytic	http://amigo.geneontology.org/amigo/term/GO:0090502	FEN1 BOP1
0.170519	1	14	19.691	GO:0097090 presynaptic membrane organization	http://amigo.geneontology.org/amigo/term/GO:0097090	PTPRD
0.170519	1	14	19.691	GO:0097468 programmed cell death in response to reactive oxygen species	http://amigo.geneontology.org/amigo/term/GO:0097468	ABL1
0.170519	2	98	5.62601	GO:1901992 positive regulation of mitotic cell cycle phase transition	http://amigo.geneontology.org/amigo/term/GO:1901992	CUL4A CUL4B
0.170519	1	14	19.691	GO:1902306 negative regulation of sodium ion transmembrane transport	http://amigo.geneontology.org/amigo/term/GO:1902306	NEDD4
0.170519	4	378	2.91719	GO:1903039 positive regulation of leukocyte cell-cell adhesion	http://amigo.geneontology.org/amigo/term/GO:1903039	ABL1 VNN1 TRAF6 ADA
0.172143	3	228	3.6273	GO:1903046 meiotic cell cycle process	http://amigo.geneontology.org/amigo/term/GO:1903046	SMC1A NSUN2 PDE3A
0.172283	2	99	5.56919	GO:0002793 positive regulation of peptide secretion	http://amigo.geneontology.org/amigo/term/GO:0002793	HIF1A AIMP1
0.173344	8	1123	1.96384	GO:0007417 central nervous system development	http://amigo.geneontology.org/amigo/term/GO:0007417	KDM4A ABL1 HIF1A LOXL3 CUL4B ROR1 MT-CO1 PPT1
0.173344	3	229	3.61146	GO:0022408 negative regulation of cell-cell adhesion	http://amigo.geneontology.org/amigo/term/GO:0022408	ITCH ABL1 LOXL3
0.173682	2	100	5.51349	GO:0007040 lysosome organization	http://amigo.geneontology.org/amigo/term/GO:0007040	VPS35 PPT1
0.173682	16	2867	1.53847	GO:0009653 anatomical structure morphogenesis	http://amigo.geneontology.org/amigo/term/GO:0009653	NEO1 NEDD4 FMNL2 FMNL3 HIF1A ABL1 KDM4C PTPRQ KDM6A PTPRD AIMP1 NPNT TRAF6 ROR1 ADA VPS35
0.173682	7	927	2.08169	GO:0030155 regulation of cell adhesion	http://amigo.geneontology.org/amigo/term/GO:0030155	ADA ITCH ABL1 VNN1 LOXL3 NPNT TRAF6
0.173682	2	100	5.51349	GO:0080171 lytic vacuole organization	http://amigo.geneontology.org/amigo/term/GO:0080171	VPS35 PPT1
0.173682	2	100	5.51349	GO:0098773 skin epidermis development	http://amigo.geneontology.org/amigo/term/GO:0098773	NSUN2 NOM1
0.173682	2	100	5.51349	GO:2001251 negative regulation of chromosome organization	http://amigo.geneontology.org/amigo/term/GO:2001251	PIF1 TPR
0.173794	5	555	2.48356	GO:0010638 positive regulation of organelle organization	http://amigo.geneontology.org/amigo/term/GO:0010638	HIF1A TPR VPS35 ABL1 FEN1
0.174108	13	2190	1.63643	GO:0006955 immune response	http://amigo.geneontology.org/amigo/term/GO:0006955	NLRC4 TRAF3 ITCH ABL1 VNN1 SCAP LOXL3 ZNFX1 PTPRD RAB43 TRAF6 ADA DMBT1
0.175085	1	15	18.3783	GO:0001768 establishment of T cell polarity	http://amigo.geneontology.org/amigo/term/GO:0001768	ABL1
0.175085	1	15	18.3783	GO:0002756 MyD88-independent toll-like receptor signaling pathway	http://amigo.geneontology.org/amigo/term/GO:0002756	TRAF3
0.175085	1	15	18.3783	GO:0006167 AMP biosynthetic process	http://amigo.geneontology.org/amigo/term/GO:0006167	ADA
0.175085	1	15	18.3783	GO:0006177 GMP biosynthetic process	http://amigo.geneontology.org/amigo/term/GO:0006177	ADA
0.175085	7	934	2.06608	GO:0006886 intracellular protein transport	http://amigo.geneontology.org/amigo/term/GO:0006886	VPS35 RAB43 TPR AP1B1 COG7 VPS16 NEDD4
0.175085	1	15	18.3783	GO:0009158 ribonucleoside monophosphate catabolic process	http://amigo.geneontology.org/amigo/term/GO:0009158	ADA
0.175085	1	15	18.3783	GO:0009200 deoxyribonucleoside triphosphate metabolic process	http://amigo.geneontology.org/amigo/term/GO:0009200	ADA
0.175085	23	4545	1.39505	GO:0009889 regulation of biosynthetic process	http://amigo.geneontology.org/amigo/term/GO:0009889	CDK13 TRAF5 HIF1A MED23 PCGF1 WDR75 TRAF3 SIM2 TRAF6 KDM4A NLRC4 KDM4C SCAP LOXL3 PIF1 VPS35 ITCH NPNT TPR SOAT1 NEDD4 ROR1 ABL1
0.175085	2	102	5.40539	GO:0010769 regulation of cell morphogenesis involved in differentiation	http://amigo.geneontology.org/amigo/term/GO:0010769	PTPRD ABL1
0.175085	11	1757	1.72591	GO:0022008 neurogenesis	http://amigo.geneontology.org/amigo/term/GO:0022008	NEO1 NEDD4 ROR1 KDM4A ABL1 HIF1A PTPRQ PTPRF PTPRD CUL4B PPT1
0.175085	1	15	18.3783	GO:0031453 positive regulation of heterochromatin assembly	http://amigo.geneontology.org/amigo/term/GO:0031453	TPR
0.175085	1	15	18.3783	GO:0032352 positive regulation of hormone metabolic process	http://amigo.geneontology.org/amigo/term/GO:0032352	HIF1A
0.175085	1	15	18.3783	GO:0032933 SREBP signaling pathway	http://amigo.geneontology.org/amigo/term/GO:0032933	SCAP
0.175085	2	102	5.40539	GO:0043535 regulation of blood vessel endothelial cell migration	http://amigo.geneontology.org/amigo/term/GO:0043535	ABL1 HIF1A
0.175085	3	233	3.54946	GO:0045637 regulation of myeloid cell differentiation	http://amigo.geneontology.org/amigo/term/GO:0045637	HIF1A TRAF6 CUL4A
0.175085	1	15	18.3783	GO:0090110 COPII-coated vesicle cargo loading	http://amigo.geneontology.org/amigo/term/GO:0090110	SCAP
0.175085	1	15	18.3783	GO:0097152 mesenchymal cell apoptotic process	http://amigo.geneontology.org/amigo/term/GO:0097152	HIF1A
0.175085	1	15	18.3783	GO:0099638 endosome to plasma membrane protein transport	http://amigo.geneontology.org/amigo/term/GO:0099638	VPS35
0.175085	1	15	18.3783	GO:0120263 positive regulation of heterochromatin organization	http://amigo.geneontology.org/amigo/term/GO:0120263	TPR
0.175085	1	15	18.3783	GO:1904889 regulation of excitatory synapse assembly	http://amigo.geneontology.org/amigo/term/GO:1904889	PTPRD
0.175085	1	15	18.3783	GO:2000052 positive regulation of non-canonical Wnt signaling pathway	http://amigo.geneontology.org/amigo/term/GO:2000052	ABL1
0.177835	2	103	5.35291	GO:0042147 retrograde transport endosome to Golgi	http://amigo.geneontology.org/amigo/term/GO:0042147	VPS35 VPS53
0.179806	1	16	17.2297	GO:0000054 ribosomal subunit export from nucleus	http://amigo.geneontology.org/amigo/term/GO:0000054	RIOK2
0.179806	1	16	17.2297	GO:0001767 establishment of lymphocyte polarity	http://amigo.geneontology.org/amigo/term/GO:0001767	ABL1
0.179806	3	239	3.46035	GO:0002819 regulation of adaptive immune response	http://amigo.geneontology.org/amigo/term/GO:0002819	LOXL3 ADA TRAF6
0.179806	2	104	5.30144	GO:0006637 acyl-CoA metabolic process	http://amigo.geneontology.org/amigo/term/GO:0006637	DGAT1 PPT1
0.179806	2	104	5.30144	GO:0007173 epidermal growth factor receptor signaling pathway	http://amigo.geneontology.org/amigo/term/GO:0007173	ABL1 HIP1
0.179806	1	16	17.2297	GO:0009163 nucleoside biosynthetic process	http://amigo.geneontology.org/amigo/term/GO:0009163	ADA
0.179806	11	1771	1.71227	GO:0009607 response to biotic stimulus	http://amigo.geneontology.org/amigo/term/GO:0009607	NLRC4 DMBT1 TRAF3 SMC1A HIF1A TRAF6 ITCH ABL1 VNN1 ZNFX1 RAB43
0.179806	9	1354	1.8324	GO:0009968 negative regulation of signal transduction	http://amigo.geneontology.org/amigo/term/GO:0009968	PDE3A ADA HIF1A PTPRT ITCH ABL1 RGS3 PTPRD NEDD4
0.179806	5	568	2.42671	GO:0010035 response to inorganic substance	http://amigo.geneontology.org/amigo/term/GO:0010035	ABL1 ADA MT-CO1 HIF1A NEDD4
0.179806	20	3847	1.43319	GO:0010604 positive regulation of macromolecule metabolic process	http://amigo.geneontology.org/amigo/term/GO:0010604	CDK13 NEDD4 ITCH MED23 WDR75 HIP1 MOB1B NLRC4 RIOK2 VPS35 ABL1 HIF1A TRAF6 KDM4A TRAF5 KDM6A CUL4B NPNT SOAT1 CENPE
0.179806	12	1994	1.65903	GO:0016310 phosphorylation	http://amigo.geneontology.org/amigo/term/GO:0016310	CDK13 MOB1B ROR1 HIF1A ABL1 NEK11 TRAF6 PTPRT RIOK2 TBCK COX11 CENPE
0.179806	1	16	17.2297	GO:0030852 regulation of granulocyte differentiation	http://amigo.geneontology.org/amigo/term/GO:0030852	CUL4A
0.179806	1	16	17.2297	GO:0032488 Cdc42 protein signal transduction	http://amigo.geneontology.org/amigo/term/GO:0032488	ABL1
0.179806	1	16	17.2297	GO:0032490 detection of molecule of bacterial origin	http://amigo.geneontology.org/amigo/term/GO:0032490	DMBT1
0.179806	1	16	17.2297	GO:0033750 ribosome localization	http://amigo.geneontology.org/amigo/term/GO:0033750	RIOK2
0.179806	1	16	17.2297	GO:0034404 nucleobase-containing small molecule biosynthetic process	http://amigo.geneontology.org/amigo/term/GO:0034404	ADA
0.179806	2	104	5.30144	GO:0035383 thioester metabolic process	http://amigo.geneontology.org/amigo/term/GO:0035383	DGAT1 PPT1
0.179806	1	16	17.2297	GO:0042159 lipoprotein catabolic process	http://amigo.geneontology.org/amigo/term/GO:0042159	PPT1
0.179806	1	16	17.2297	GO:0050862 positive regulation of T cell receptor signaling pathway	http://amigo.geneontology.org/amigo/term/GO:0050862	ADA
0.179806	1	16	17.2297	GO:0055089 fatty acid homeostasis	http://amigo.geneontology.org/amigo/term/GO:0055089	DGAT1
0.179806	1	16	17.2297	GO:0060192 negative regulation of lipase activity	http://amigo.geneontology.org/amigo/term/GO:0060192	ABL1
0.179806	1	16	17.2297	GO:0071501 cellular response to sterol depletion	http://amigo.geneontology.org/amigo/term/GO:0071501	SCAP
0.179806	2	105	5.25095	GO:0071868 cellular response to monoamine stimulus	http://amigo.geneontology.org/amigo/term/GO:0071868	VPS35 ABL1
0.179806	2	105	5.25095	GO:0071870 cellular response to catecholamine stimulus	http://amigo.geneontology.org/amigo/term/GO:0071870	VPS35 ABL1
0.179806	1	16	17.2297	GO:0080009 mRNA methylation	http://amigo.geneontology.org/amigo/term/GO:0080009	NSUN2
0.179806	2	105	5.25095	GO:0090288 negative regulation of cellular response to growth factor stimulus	http://amigo.geneontology.org/amigo/term/GO:0090288	ABL1 NEDD4
0.179806	1	16	17.2297	GO:0090594 inflammatory response to wounding	http://amigo.geneontology.org/amigo/term/GO:0090594	HIF1A
0.179806	1	16	17.2297	GO:0098969 neurotransmitter receptor transport to postsynaptic membrane	http://amigo.geneontology.org/amigo/term/GO:0098969	VPS35
0.179806	1	16	17.2297	GO:2000095 regulation of Wnt signaling pathway planar cell polarity pathway	http://amigo.geneontology.org/amigo/term/GO:2000095	ABL1
0.179806	2	104	5.30144	GO:2000514 regulation of CD4-positive alpha-beta T cell activation	http://amigo.geneontology.org/amigo/term/GO:2000514	ITCH LOXL3
0.180261	2	106	5.20141	GO:0021549 cerebellum development	http://amigo.geneontology.org/amigo/term/GO:0021549	ABL1 MT-CO1
0.180261	2	106	5.20141	GO:0042100 B cell proliferation	http://amigo.geneontology.org/amigo/term/GO:0042100	ABL1 ADA
0.182855	2	107	5.1528	GO:0010595 positive regulation of endothelial cell migration	http://amigo.geneontology.org/amigo/term/GO:0010595	ABL1 HIF1A
0.182855	2	107	5.1528	GO:0030510 regulation of BMP signaling pathway	http://amigo.geneontology.org/amigo/term/GO:0030510	NEO1 ABL1
0.183758	1	17	16.2162	GO:0000463 maturation of LSU-rRNA from tricistronic rRNA transcript (SSU-rRNA 5.8S rRNA LSU-rRNA)	http://amigo.geneontology.org/amigo/term/GO:0000463	BOP1
0.183758	1	17	16.2162	GO:0000478 endonucleolytic cleavage involved in rRNA processing	http://amigo.geneontology.org/amigo/term/GO:0000478	BOP1
0.183758	1	17	16.2162	GO:0000479 endonucleolytic cleavage of tricistronic rRNA transcript (SSU-rRNA 5.8S rRNA LSU-rRNA)	http://amigo.geneontology.org/amigo/term/GO:0000479	BOP1
0.183758	4	404	2.72945	GO:0009100 glycoprotein metabolic process	http://amigo.geneontology.org/amigo/term/GO:0009100	MGAT2 HIF1A SOAT1 COG7
0.183758	5	578	2.38473	GO:0009117 nucleotide metabolic process	http://amigo.geneontology.org/amigo/term/GO:0009117	HIF1A DGAT1 ADA MBD4 PPT1
0.183758	1	17	16.2162	GO:0009151 purine deoxyribonucleotide metabolic process	http://amigo.geneontology.org/amigo/term/GO:0009151	ADA
0.183758	7	961	2.00804	GO:0010562 positive regulation of phosphorus metabolic process	http://amigo.geneontology.org/amigo/term/GO:0010562	MOB1B ROR1 HIF1A ABL1 TRAF6 NPNT CENPE
0.183758	2	108	5.10509	GO:0019646 aerobic electron transport chain	http://amigo.geneontology.org/amigo/term/GO:0019646	MT-CO1 COX15
0.183758	2	108	5.10509	GO:0032006 regulation of TOR signaling	http://amigo.geneontology.org/amigo/term/GO:0032006	HIF1A TBCK
0.183758	2	109	5.05825	GO:0032088 negative regulation of NF-kappaB transcription factor activity	http://amigo.geneontology.org/amigo/term/GO:0032088	TRAF3 ITCH
0.183758	1	17	16.2162	GO:0045144 meiotic sister chromatid segregation	http://amigo.geneontology.org/amigo/term/GO:0045144	SMC1A
0.183758	2	109	5.05825	GO:0045807 positive regulation of endocytosis	http://amigo.geneontology.org/amigo/term/GO:0045807	HIP1 PPT1
0.183758	7	961	2.00804	GO:0045937 positive regulation of phosphate metabolic process	http://amigo.geneontology.org/amigo/term/GO:0045937	MOB1B ROR1 HIF1A ABL1 TRAF6 NPNT CENPE
0.183758	3	244	3.38944	GO:0046777 protein autophosphorylation	http://amigo.geneontology.org/amigo/term/GO:0046777	ABL1 MOB1B RIOK2
0.183758	1	17	16.2162	GO:0048268 clathrin coat assembly	http://amigo.geneontology.org/amigo/term/GO:0048268	HIP1
0.183758	4	403	2.73623	GO:0050727 regulation of inflammatory response	http://amigo.geneontology.org/amigo/term/GO:0050727	FEM1A NLRC4 ADA VPS35
0.183758	1	17	16.2162	GO:0050910 detection of mechanical stimulus involved in sensory perception of sound	http://amigo.geneontology.org/amigo/term/GO:0050910	PTPRQ
0.183758	1	17	16.2162	GO:0051177 meiotic sister chromatid cohesion	http://amigo.geneontology.org/amigo/term/GO:0051177	SMC1A
0.183758	2	108	5.10509	GO:0051963 regulation of synapse assembly	http://amigo.geneontology.org/amigo/term/GO:0051963	PTPRD VPS35
0.183758	2	108	5.10509	GO:0071867 response to monoamine	http://amigo.geneontology.org/amigo/term/GO:0071867	VPS35 ABL1
0.183758	2	108	5.10509	GO:0071869 response to catecholamine	http://amigo.geneontology.org/amigo/term/GO:0071869	VPS35 ABL1
0.183758	1	17	16.2162	GO:0071871 response to epinephrine	http://amigo.geneontology.org/amigo/term/GO:0071871	ABL1
0.183758	1	17	16.2162	GO:0098877 neurotransmitter receptor transport to plasma membrane	http://amigo.geneontology.org/amigo/term/GO:0098877	VPS35
0.183758	1	17	16.2162	GO:1900006 positive regulation of dendrite development	http://amigo.geneontology.org/amigo/term/GO:1900006	ABL1
0.183758	1	17	16.2162	GO:1900272 negative regulation of long-term synaptic potentiation	http://amigo.geneontology.org/amigo/term/GO:1900272	ABL1
0.183758	3	243	3.40339	GO:1901215 negative regulation of neuron death	http://amigo.geneontology.org/amigo/term/GO:1901215	HIF1A VPS35 PPT1
0.183758	1	17	16.2162	GO:1903540 establishment of protein localization to postsynaptic membrane	http://amigo.geneontology.org/amigo/term/GO:1903540	VPS35
0.183758	1	17	16.2162	GO:1905269 positive regulation of chromatin organization	http://amigo.geneontology.org/amigo/term/GO:1905269	TPR
0.183758	1	17	16.2162	GO:2000562 negative regulation of CD4-positive alpha-beta T cell proliferation	http://amigo.geneontology.org/amigo/term/GO:2000562	ITCH
0.184471	3	246	3.36189	GO:0033673 negative regulation of kinase activity	http://amigo.geneontology.org/amigo/term/GO:0033673	ABL1 PTPRT COX11
0.184471	4	406	2.71601	GO:0070997 neuron death	http://amigo.geneontology.org/amigo/term/GO:0070997	HIF1A VPS35 ABL1 PPT1
0.186063	3	247	3.34828	GO:0050821 protein stabilization	http://amigo.geneontology.org/amigo/term/GO:0050821	CSN3 HIP1 COG7
0.187565	2	111	4.96711	GO:0006939 smooth muscle contraction	http://amigo.geneontology.org/amigo/term/GO:0006939	NPNT ADA
0.187565	5	585	2.35619	GO:0048667 cell morphogenesis involved in neuron differentiation	http://amigo.geneontology.org/amigo/term/GO:0048667	NEO1 NEDD4 PTPRQ PTPRD ABL1
0.187565	2	111	4.96711	GO:0051341 regulation of oxidoreductase activity	http://amigo.geneontology.org/amigo/term/GO:0051341	ABL1 HIF1A
0.18831	5	586	2.35217	GO:0009896 positive regulation of catabolic process	http://amigo.geneontology.org/amigo/term/GO:0009896	NEDD4 ITCH HIF1A CUL4B VPS35
0.188399	1	18	15.3153	GO:0002295 T-helper cell lineage commitment	http://amigo.geneontology.org/amigo/term/GO:0002295	LOXL3
0.188399	1	18	15.3153	GO:0006474 N-terminal protein amino acid acetylation	http://amigo.geneontology.org/amigo/term/GO:0006474	NAA50
0.188399	5	588	2.34417	GO:0006753 nucleoside phosphate metabolic process	http://amigo.geneontology.org/amigo/term/GO:0006753	HIF1A DGAT1 ADA MBD4 PPT1
0.188399	1	18	15.3153	GO:0006991 response to sterol depletion	http://amigo.geneontology.org/amigo/term/GO:0006991	SCAP
0.188399	10	1594	1.72945	GO:0007010 cytoskeleton organization	http://amigo.geneontology.org/amigo/term/GO:0007010	TPR HIP1 FMNL2 FMNL3 HAUS7 ABL1 SMC1A CENPE TBCK FSIP2
0.188399	1	18	15.3153	GO:0007135 meiosis II	http://amigo.geneontology.org/amigo/term/GO:0007135	SMC1A
0.188399	1	18	15.3153	GO:0007250 activation of NF-kappaB-inducing kinase activity	http://amigo.geneontology.org/amigo/term/GO:0007250	TRAF6
0.188399	1	18	15.3153	GO:0009223 pyrimidine deoxyribonucleotide catabolic process	http://amigo.geneontology.org/amigo/term/GO:0009223	MBD4
0.188399	1	18	15.3153	GO:0020027 hemoglobin metabolic process	http://amigo.geneontology.org/amigo/term/GO:0020027	HIF1A
0.188399	1	18	15.3153	GO:0043117 positive regulation of vascular permeability	http://amigo.geneontology.org/amigo/term/GO:0043117	PDE3A
0.188399	1	18	15.3153	GO:0045540 regulation of cholesterol biosynthetic process	http://amigo.geneontology.org/amigo/term/GO:0045540	SCAP
0.188399	1	18	15.3153	GO:0045623 negative regulation of T-helper cell differentiation	http://amigo.geneontology.org/amigo/term/GO:0045623	LOXL3
0.188399	1	18	15.3153	GO:0060644 mammary gland epithelial cell differentiation	http://amigo.geneontology.org/amigo/term/GO:0060644	HIF1A
0.188399	1	18	15.3153	GO:0061298 retina vasculature development in camera-type eye	http://amigo.geneontology.org/amigo/term/GO:0061298	HIF1A
0.188399	1	18	15.3153	GO:0061983 meiosis II cell cycle process	http://amigo.geneontology.org/amigo/term/GO:0061983	SMC1A
0.188399	1	18	15.3153	GO:0106118 regulation of sterol biosynthetic process	http://amigo.geneontology.org/amigo/term/GO:0106118	SCAP
0.188399	5	590	2.33623	GO:1901615 organic hydroxy compound metabolic process	http://amigo.geneontology.org/amigo/term/GO:1901615	SOAT1 SCAP VPS35 HIF1A DGAT1
0.188399	1	18	15.3153	GO:1901978 positive regulation of cell cycle checkpoint	http://amigo.geneontology.org/amigo/term/GO:1901978	TPR
0.188399	1	18	15.3153	GO:1905146 lysosomal protein catabolic process	http://amigo.geneontology.org/amigo/term/GO:1905146	VPS35
0.188399	1	18	15.3153	GO:1905874 regulation of postsynaptic density organization	http://amigo.geneontology.org/amigo/term/GO:1905874	PTPRD
0.188399	2	112	4.92276	GO:2000106 regulation of leukocyte apoptotic process	http://amigo.geneontology.org/amigo/term/GO:2000106	HIF1A ADA
0.188766	2	113	4.8792	GO:0071103 DNA conformation change	http://amigo.geneontology.org/amigo/term/GO:0071103	PIF1 ABL1
0.189532	3	252	3.28184	GO:0016358 dendrite development	http://amigo.geneontology.org/amigo/term/GO:0016358	NEDD4 ABL1 PTPRD
0.19048	4	415	2.65711	GO:0070661 leukocyte proliferation	http://amigo.geneontology.org/amigo/term/GO:0070661	ITCH ABL1 TRAF6 ADA
0.190915	3	253	3.26887	GO:0045930 negative regulation of mitotic cell cycle	http://amigo.geneontology.org/amigo/term/GO:0045930	NEK11 ABL1 TPR
0.193338	1	19	14.5092	GO:0001829 trophectodermal cell differentiation	http://amigo.geneontology.org/amigo/term/GO:0001829	ADA
0.193338	1	19	14.5092	GO:0006089 lactate metabolic process	http://amigo.geneontology.org/amigo/term/GO:0006089	HIF1A
0.193338	1	19	14.5092	GO:0009125 nucleoside monophosphate catabolic process	http://amigo.geneontology.org/amigo/term/GO:0009125	ADA
0.193338	1	19	14.5092	GO:0010766 negative regulation of sodium ion transport	http://amigo.geneontology.org/amigo/term/GO:0010766	NEDD4
0.193338	2	116	4.75301	GO:0022037 metencephalon development	http://amigo.geneontology.org/amigo/term/GO:0022037	ABL1 MT-CO1
0.193338	4	418	2.63804	GO:0032259 methylation	http://amigo.geneontology.org/amigo/term/GO:0032259	NSUN2 KDM6A KDM4A KDM4C
0.193338	2	116	4.75301	GO:0032784 regulation of DNA-templated transcription elongation	http://amigo.geneontology.org/amigo/term/GO:0032784	CDK13 MED23
0.193338	1	19	14.5092	GO:0035372 protein localization to microtubule	http://amigo.geneontology.org/amigo/term/GO:0035372	ABL1
0.193338	2	116	4.75301	GO:0042773 ATP synthesis coupled electron transport	http://amigo.geneontology.org/amigo/term/GO:0042773	MT-CO1 COX15
0.193338	2	116	4.75301	GO:0042775 mitochondrial ATP synthesis coupled electron transport	http://amigo.geneontology.org/amigo/term/GO:0042775	MT-CO1 COX15
0.193338	1	19	14.5092	GO:0043116 negative regulation of vascular permeability	http://amigo.geneontology.org/amigo/term/GO:0043116	PDE3A
0.193338	1	19	14.5092	GO:0043173 nucleotide salvage	http://amigo.geneontology.org/amigo/term/GO:0043173	ADA
0.193338	2	115	4.79434	GO:0045639 positive regulation of myeloid cell differentiation	http://amigo.geneontology.org/amigo/term/GO:0045639	HIF1A TRAF6
0.193338	1	19	14.5092	GO:0046827 positive regulation of protein export from nucleus	http://amigo.geneontology.org/amigo/term/GO:0046827	TPR
0.193338	6	788	2.09905	GO:0050865 regulation of cell activation	http://amigo.geneontology.org/amigo/term/GO:0050865	ITCH ABL1 VNN1 LOXL3 TRAF6 ADA
0.193338	1	19	14.5092	GO:0051382 kinetochore assembly	http://amigo.geneontology.org/amigo/term/GO:0051382	CENPE
0.193338	1	19	14.5092	GO:0090084 negative regulation of inclusion body assembly	http://amigo.geneontology.org/amigo/term/GO:0090084	SACS
0.193338	1	19	14.5092	GO:0097107 postsynaptic density assembly	http://amigo.geneontology.org/amigo/term/GO:0097107	PTPRD
0.193338	2	116	4.75301	GO:1901890 positive regulation of cell junction assembly	http://amigo.geneontology.org/amigo/term/GO:1901890	PTPRD ABL1
0.193338	1	19	14.5092	GO:1902176 negative regulation of oxidative stress-induced intrinsic apoptotic signaling pathway	http://amigo.geneontology.org/amigo/term/GO:1902176	HIF1A
0.193338	2	116	4.75301	GO:1904892 regulation of receptor signaling pathway via STAT	http://amigo.geneontology.org/amigo/term/GO:1904892	PTPRT PTPRD
0.1934	3	257	3.21799	GO:0002833 positive regulation of response to biotic stimulus	http://amigo.geneontology.org/amigo/term/GO:0002833	ZNFX1 TRAF6 NLRC4
0.1934	3	257	3.21799	GO:0016197 endosomal transport	http://amigo.geneontology.org/amigo/term/GO:0016197	VPS35 VPS53 VPS16
0.193624	5	600	2.29729	GO:0045785 positive regulation of cell adhesion	http://amigo.geneontology.org/amigo/term/GO:0045785	ABL1 VNN1 NPNT TRAF6 ADA
0.194549	2	117	4.71239	GO:0014066 regulation of phosphatidylinositol 3-kinase signaling	http://amigo.geneontology.org/amigo/term/GO:0014066	ROR1 NEDD4
0.194549	2	117	4.71239	GO:0048259 regulation of receptor-mediated endocytosis	http://amigo.geneontology.org/amigo/term/GO:0048259	HIP1 PPT1
0.196156	3	259	3.19314	GO:0070085 glycosylation	http://amigo.geneontology.org/amigo/term/GO:0070085	MGAT2 PIGM COG7
0.196679	2	118	4.67245	GO:0006368 transcription elongation from RNA polymerase II promoter	http://amigo.geneontology.org/amigo/term/GO:0006368	CDK13 MED23
0.196679	22	4425	1.37059	GO:0034654 nucleobase-containing compound biosynthetic process	http://amigo.geneontology.org/amigo/term/GO:0034654	CDK13 TRAF5 HIF1A MED23 PCGF1 WDR75 TRAF3 SIM2 TRAF6 ADA KDM4A NLRC4 KDM4C LOXL3 PIF1 ITCH NPNT TPR NEDD4 ROR1 ABL1 PPT1
0.196679	6	794	2.08318	GO:0055080 cation homeostasis	http://amigo.geneontology.org/amigo/term/GO:0055080	RHBG COX11 NEO1 ABL1 HIF1A PPT1
0.197129	3	260	3.18086	GO:0045333 cellular respiration	http://amigo.geneontology.org/amigo/term/GO:0045333	MT-CO1 HIF1A COX15
0.198597	1	20	13.7837	GO:0002666 positive regulation of T cell tolerance induction	http://amigo.geneontology.org/amigo/term/GO:0002666	ITCH
0.198597	16	2990	1.47518	GO:0007166 cell surface receptor signaling pathway	http://amigo.geneontology.org/amigo/term/GO:0007166	TRAF5 TRAF3 TRAF6 ADA HIF1A PTPRT NEO1 VPS35 ABL1 LOXL3 PTPRD NPNT ROR1 HIP1 NEDD4 PTPRF
0.198597	1	20	13.7837	GO:0010878 cholesterol storage	http://amigo.geneontology.org/amigo/term/GO:0010878	SOAT1
0.198597	1	20	13.7837	GO:0019896 axonal transport of mitochondrion	http://amigo.geneontology.org/amigo/term/GO:0019896	HIF1A
0.198597	1	20	13.7837	GO:0045947 negative regulation of translational initiation	http://amigo.geneontology.org/amigo/term/GO:0045947	TPR
0.198597	1	20	13.7837	GO:0046112 nucleobase biosynthetic process	http://amigo.geneontology.org/amigo/term/GO:0046112	ADA
0.198597	1	20	13.7837	GO:0097062 dendritic spine maintenance	http://amigo.geneontology.org/amigo/term/GO:0097062	VPS35
0.198597	1	20	13.7837	GO:0097202 activation of cysteine-type endopeptidase activity	http://amigo.geneontology.org/amigo/term/GO:0097202	NLRC4
0.198597	1	20	13.7837	GO:0099563 modification of synaptic structure	http://amigo.geneontology.org/amigo/term/GO:0099563	ABL1
0.198597	1	20	13.7837	GO:1901659 glycosyl compound biosynthetic process	http://amigo.geneontology.org/amigo/term/GO:1901659	ADA
0.198597	1	20	13.7837	GO:2000251 positive regulation of actin cytoskeleton reorganization	http://amigo.geneontology.org/amigo/term/GO:2000251	ABL1
0.198597	1	20	13.7837	GO:2000434 regulation of protein neddylation	http://amigo.geneontology.org/amigo/term/GO:2000434	HIF1A
0.198963	2	120	4.59458	GO:0032479 regulation of type I interferon production	http://amigo.geneontology.org/amigo/term/GO:0032479	TRAF3 ITCH
0.198963	2	120	4.59458	GO:0032606 type I interferon production	http://amigo.geneontology.org/amigo/term/GO:0032606	TRAF3 ITCH
0.198963	2	120	4.59458	GO:1902106 negative regulation of leukocyte differentiation	http://amigo.geneontology.org/amigo/term/GO:1902106	LOXL3 CUL4A
0.198963	2	120	4.59458	GO:2001252 positive regulation of chromosome organization	http://amigo.geneontology.org/amigo/term/GO:2001252	TPR FEN1
0.199031	3	263	3.14458	GO:0051402 neuron apoptotic process	http://amigo.geneontology.org/amigo/term/GO:0051402	HIF1A ABL1 PPT1
0.199054	1	21	13.1274	GO:0002223 stimulatory C-type lectin receptor signaling pathway	http://amigo.geneontology.org/amigo/term/GO:0002223	TRAF6
0.199054	1	21	13.1274	GO:0002902 regulation of B cell apoptotic process	http://amigo.geneontology.org/amigo/term/GO:0002902	ADA
0.199054	1	21	13.1274	GO:0007042 lysosomal lumen acidification	http://amigo.geneontology.org/amigo/term/GO:0007042	PPT1
0.199054	1	21	13.1274	GO:0007063 regulation of sister chromatid cohesion	http://amigo.geneontology.org/amigo/term/GO:0007063	FEN1
0.199054	1	21	13.1274	GO:0007625 grooming behavior	http://amigo.geneontology.org/amigo/term/GO:0007625	PPT1
0.199054	1	21	13.1274	GO:0009168 purine ribonucleoside monophosphate biosynthetic process	http://amigo.geneontology.org/amigo/term/GO:0009168	ADA
0.199054	1	21	13.1274	GO:0009713 catechol-containing compound biosynthetic process	http://amigo.geneontology.org/amigo/term/GO:0009713	VPS35
0.199054	12	2086	1.58586	GO:0009888 tissue development	http://amigo.geneontology.org/amigo/term/GO:0009888	LOXL3 NSUN2 ABL1 HIF1A PTPRQ NOM1 KDM6A NPNT TRAF6 ROR1 ADA DMBT1
0.199054	4	434	2.54078	GO:0022409 positive regulation of cell-cell adhesion	http://amigo.geneontology.org/amigo/term/GO:0022409	ABL1 VNN1 TRAF6 ADA
0.199054	1	21	13.1274	GO:0030903 notochord development	http://amigo.geneontology.org/amigo/term/GO:0030903	KDM6A
0.199054	7	1001	1.9278	GO:0031175 neuron projection development	http://amigo.geneontology.org/amigo/term/GO:0031175	NEO1 NEDD4 ROR1 ABL1 PTPRF PTPRD CUL4B
0.199054	2	122	4.51926	GO:0038127 ERBB signaling pathway	http://amigo.geneontology.org/amigo/term/GO:0038127	ABL1 HIP1
0.199054	1	21	13.1274	GO:0042053 regulation of dopamine metabolic process	http://amigo.geneontology.org/amigo/term/GO:0042053	VPS35
0.199054	1	21	13.1274	GO:0042069 regulation of catecholamine metabolic process	http://amigo.geneontology.org/amigo/term/GO:0042069	VPS35

## Sheet: C.Petrosia_ficiformis
Enrichment FDR	nGenes	Pathway Genes	Fold Enrichment	Pathway	URL	Genes
5.15444e-05	14	276	7.03412	GO:0021537 telencephalon development	http://amigo.geneontology.org/amigo/term/GO:0021537	CDON PTPRS KAT2A FOXP1 EGFR RYK PTEN FUT10 BBS1 H2AX LRRK2 FAT4 FOXP2 ROBO2
8.90806e-05	16	409	5.42485	GO:0030900 forebrain development	http://amigo.geneontology.org/amigo/term/GO:0030900	CDON PTPRS KAT2A FOXP1 EGFR WNT4 RYK UBB PTEN FUT10 BBS1 H2AX LRRK2 FAT4 FOXP2 ROBO2
0.00084759	45	2990	2.08705	GO:0007166 cell surface receptor signaling pathway	http://amigo.geneontology.org/amigo/term/GO:0007166	MUSK CASP8 ERBB3 TRAF5 AAK1 GRM4 TRAF2 TRAF3 LRP4 EGFR WNT4 RYK DTX3L LRRK2 HEY1 TBK1 PLCG1 PTEN GAS6 CDON NEO1 IFT27 TTC23 TRPA1 TBX2 PTPRA KCP WDR12 CNOT9 DGKI SENP2 ABCA1 SVEP1 GRB2 FAT4 ANXA4 LRIG2 FOXP1 RAC1 CASP1 NEDD4 LRP1 ROBO2 PLD2 FURIN
0.00084759	41	2618	2.17173	GO:0007399 nervous system development	http://amigo.geneontology.org/amigo/term/GO:0007399	CDON ERBB3 NEO1 SDK2 NEDD4 LRP4 RAC1 SDK1 WNT4 RYK HEY1 ROBO2 LRRK2 USH2A PTPRM IFT27 PTPRS KAT2A UBE3A FOXP1 TBX2 LIAS PIGT EGFR CUL4B UBB PTEN FUT10 KAT5 RAPH1 BBS1 GAS6 H2AX FAT4 LRIG2 FOXP2 PRPS1 DCTN1 MUSK LRP1 TRIM3
0.00084759	39	2427	2.22836	GO:0048584 positive regulation of response to stimulus	http://amigo.geneontology.org/amigo/term/GO:0048584	TRAF4 TRAF5 AAK1 TRAF2 TRAF3 CASP1 LRRK2 PLCG1 GRM4 SLF1 EGFR RYK UBB KAT5 GAS6 CDON ERBB3 NEO1 TTC23 UBE3A FOXP1 KCP DGKI NLRP3 PTEN ATR TBK1 CASP8 PTBP1 NEDD4 VAMP7 PCNA RAC1 CNOT9 MRNIP DTX3L ROBO2 H2AX PLD2
0.00158208	52	3932	1.83392	GO:0006464 cellular protein modification process	http://amigo.geneontology.org/amigo/term/GO:0006464	POMT2 NEDD4 TRAF5 PTPRS KAT2A DPH1 TRIM2 TRIM3 UBE3A AAK1 PIGT TRAF2 TRAF3 MGAT1 PTPRA DPH2 CUL4B SENP3 DTX3L SENP2 UBB PTEN ALG14 PTPRM ATR TBK1 UBE2F LRRK2 SLF1 KAT5 TRAF4 EGFR GAS6 MUSK CDON ERBB3 LIAS LRP4 DCAF7 DCAF6 NEK8 EXTL2 RYK ABCA1 FUT10 LTN1 ZBED1 PTBP1 RAC1 CNOT9 MRNIP LRP1
0.00158208	29	1645	2.44469	GO:0009967 positive regulation of signal transduction	http://amigo.geneontology.org/amigo/term/GO:0009967	TRAF4 TRAF5 AAK1 TRAF2 TRAF3 LRRK2 GRM4 EGFR RYK UBB GAS6 CDON ERBB3 NEO1 TTC23 UBE3A KCP DGKI PTEN TBK1 CASP8 CASP1 PTBP1 NEDD4 FOXP1 CNOT9 ATR ROBO2 RAC1
0.00158208	8	134	8.27897	GO:0021987 cerebral cortex development	http://amigo.geneontology.org/amigo/term/GO:0021987	CDON PTPRS EGFR FUT10 BBS1 H2AX FAT4 FOXP2
0.00158208	49	3615	1.87966	GO:0023051 regulation of signaling	http://amigo.geneontology.org/amigo/term/GO:0023051	TRAF4 TRAF5 NPRL2 AAK1 GRM4 TRAF2 TRAF3 LRP4 DGKI PTEN LRRK2 ERBB3 NSF FOXP1 EGFR ITPR1 NEK8 RYK HEY1 UBB GAS6 CDON NEO1 TTC23 PTPRS KAT2A UBE3A HELLS PTPRA KCP FURIN WNT4 GRB2 TBK1 NBR1 LRIG2 CASP8 CASP1 PTBP1 NEDD4 PLCG1 VAMP7 CNOT9 ABCA1 ATR LRP1 ROBO2 SENP2 RAC1
0.00158208	31	1836	2.34142	GO:0023056 positive regulation of signaling	http://amigo.geneontology.org/amigo/term/GO:0023056	TRAF4 TRAF5 AAK1 TRAF2 TRAF3 LRRK2 NSF GRM4 EGFR RYK UBB GAS6 CDON ERBB3 NEO1 TTC23 UBE3A KCP DGKI PTEN TBK1 CASP8 CASP1 PTBP1 NEDD4 FOXP1 VAMP7 CNOT9 ATR ROBO2 RAC1
0.00158208	52	3952	1.82464	GO:0036211 protein modification process	http://amigo.geneontology.org/amigo/term/GO:0036211	POMT2 NEDD4 TRAF5 PTPRS KAT2A DPH1 TRIM2 TRIM3 UBE3A AAK1 PIGT TRAF2 TRAF3 MGAT1 PTPRA DPH2 CUL4B SENP3 DTX3L SENP2 UBB PTEN ALG14 PTPRM ATR TBK1 UBE2F LRRK2 SLF1 KAT5 TRAF4 EGFR GAS6 MUSK CDON ERBB3 LIAS LRP4 DCAF7 DCAF6 NEK8 EXTL2 RYK ABCA1 FUT10 LTN1 ZBED1 PTBP1 RAC1 CNOT9 MRNIP LRP1
0.00158208	54	4206	1.78039	GO:0043412 macromolecule modification	http://amigo.geneontology.org/amigo/term/GO:0043412	POMT2 NSUN2 NEDD4 TRAF5 PTPRS KAT2A DPH1 TRIM2 TRIM3 UBE3A AAK1 HELLS PIGT TRAF2 TRAF3 MGAT1 PTPRA DPH2 CUL4B SENP3 DTX3L SENP2 UBB PTEN ALG14 PTPRM ATR TBK1 UBE2F LRRK2 SLF1 KAT5 TRAF4 EGFR GAS6 MUSK CDON ERBB3 LIAS LRP4 DCAF7 DCAF6 NEK8 EXTL2 RYK ABCA1 FUT10 LTN1 ZBED1 PTBP1 RAC1 CNOT9 MRNIP LRP1
0.00158208	56	4338	1.79015	GO:0048583 regulation of response to stimulus	http://amigo.geneontology.org/amigo/term/GO:0048583	TRAF4 TRAF5 NPRL2 AAK1 TRAF2 TRAF3 LRP4 CASP1 PTEN LRRK2 KAT2A KAT5 ATR ERBB3 FOXP1 PLCG1 GRM4 SLF1 EGFR ITPR1 NEK8 RYK HEY1 UBB GAS6 ROBO2 CDON NEO1 TTC23 PTPRS UBE3A HELLS KCP FURIN DGKI WNT4 NLRP3 GRB2 TBK1 NBR1 LRIG2 CASP8 DTX3L PTBP1 NEDD4 ABCB1 VAMP7 PCNA RAC1 CNOT9 MRNIP ABCA1 LRP1 SENP2 H2AX PLD2
0.00158208	29	1618	2.48548	GO:0051247 positive regulation of protein metabolic process	http://amigo.geneontology.org/amigo/term/GO:0051247	CASP8 NEDD4 FURIN LRRK2 TRAF4 UBE3A TRAF2 EGFR UBB PTEN KAT5 GAS6 POMT2 CDON KAT2A LRP4 CASP1 CUL4B NLRP3 PTBP1 MUSK ERBB3 NSF LRP1 RAC1 CNOT9 MRNIP SENP2 TBK1
0.00158208	28	1529	2.53946	GO:0080134 regulation of response to stress	http://amigo.geneontology.org/amigo/term/GO:0080134	TRAF4 TRAF5 TRAF2 TRAF3 CASP1 KAT2A KAT5 ATR FOXP1 SLF1 EGFR PTPRS WNT4 NLRP3 PTEN TBK1 NBR1 LRRK2 LRIG2 DTX3L ABCB1 VAMP7 PCNA MRNIP CASP8 H2AX PLCG1 FURIN
0.00158208	19	782	3.36929	GO:0080135 regulation of cellular response to stress	http://amigo.geneontology.org/amigo/term/GO:0080135	TRAF4 TRAF5 TRAF2 TRAF3 KAT2A KAT5 ATR SLF1 EGFR PTPRS FOXP1 PTEN NBR1 LRIG2 PCNA MRNIP DTX3L LRRK2 H2AX
0.00173041	30	1757	2.36778	GO:0022008 neurogenesis	http://amigo.geneontology.org/amigo/term/GO:0022008	NEO1 NEDD4 LRP4 RAC1 WNT4 RYK HEY1 ROBO2 LRRK2 USH2A PTPRM CDON ERBB3 SDK2 IFT27 PTPRS UBE3A TBX2 PIGT SDK1 CUL4B UBB PTEN KAT5 RAPH1 BBS1 GAS6 FAT4 LRIG2 LRP1
0.00184869	48	3602	1.84794	GO:0010646 regulation of cell communication	http://amigo.geneontology.org/amigo/term/GO:0010646	TRAF4 TRAF5 NPRL2 AAK1 GRM4 TRAF2 TRAF3 LRP4 DGKI PTEN LRRK2 ERBB3 FOXP1 EGFR ITPR1 NEK8 RYK HEY1 UBB GAS6 CDON NEO1 TTC23 PTPRS KAT2A UBE3A HELLS PTPRA KCP FURIN WNT4 GRB2 TBK1 NBR1 LRIG2 CASP8 CASP1 PTBP1 NEDD4 PLCG1 VAMP7 CNOT9 ABCA1 ATR LRP1 ROBO2 SENP2 RAC1
0.00184869	9	192	6.50028	GO:0021543 pallium development	http://amigo.geneontology.org/amigo/term/GO:0021543	CDON PTPRS EGFR PTEN FUT10 BBS1 H2AX FAT4 FOXP2
0.00184869	34	2160	2.18281	GO:0033554 cellular response to stress	http://amigo.geneontology.org/amigo/term/GO:0033554	JKAMP MCM2 TRAF4 TRAF5 NPRL2 TRAF2 TRAF3 PCNA XPR1 CUL4B MRNIP ATR H2AX KAT2A SLF1 CASP1 KAT5 TRPA1 TBX2 EGFR LRRK2 TIPIN PTPRS FOXP1 PIF1 ITPR1 WNT4 DTX3L PTEN GAS6 NBR1 LRIG2 NEDD4 GRB2
0.00184869	57	4617	1.71201	GO:0048731 system development	http://amigo.geneontology.org/amigo/term/GO:0048731	CASP8 CDON ERBB3 NEO1 SDK2 NEDD4 LRP4 RAC1 SDK1 WNT4 DPPA2 RYK HEY1 SVEP1 ROBO2 LRRK2 USH2A FOXP1 PLCG1 KAT5 PTPRM GAS6 IFT27 PTPRS KAT2A UBE3A HELLS TBX2 LIAS PIGT PCNA KCP FRAS1 EGFR CUL4B NEK8 MATN1 NLRP3 SANBR UBB PTEN FUT10 RAPH1 BBS1 GRB2 H2AX FAT4 LRIG2 FOXP2 BTG1 PRPS1 DCTN1 MUSK LRP1 GLRX5 ATG9A TRIM3
0.00184869	22	1078	2.83006	GO:1902533 positive regulation of intracellular signal transduction	http://amigo.geneontology.org/amigo/term/GO:1902533	TRAF4 TRAF5 TRAF2 TRAF3 LRRK2 GRM4 EGFR RYK UBB GAS6 CDON ERBB3 UBE3A DGKI PTEN CASP8 CASP1 TBK1 PTBP1 NEDD4 ATR RAC1
0.00217561	44	3210	1.90081	GO:0009966 regulation of signal transduction	http://amigo.geneontology.org/amigo/term/GO:0009966	TRAF4 TRAF5 NPRL2 AAK1 TRAF2 TRAF3 LRP4 PTEN LRRK2 ERBB3 FOXP1 GRM4 EGFR ITPR1 NEK8 RYK HEY1 UBB GAS6 CDON NEO1 TTC23 UBE3A HELLS KCP FURIN DGKI WNT4 GRB2 TBK1 NBR1 LRIG2 CASP8 CASP1 PTBP1 NEDD4 PTPRS CNOT9 ABCA1 ATR LRP1 ROBO2 SENP2 RAC1
0.00233633	40	2805	1.97751	GO:0009056 catabolic process	http://amigo.geneontology.org/amigo/term/GO:0009056	JKAMP NEDD4 TRIM2 TRIM3 UBE3A NPRL2 GALE LRP1 HELZ2 SNX14 EI24 CUL4B NEMF UBB NBR1 LRRK2 LTN1 ATG9A SMG5 FURIN CNOT9 EGFR PTEN KAT5 TBK1 NSUN2 TRAF4 TRAF5 PLCG1 TRAF2 PLD2 MGAT1 NAAA LRIG2 CASP8 NSF LRP4 DTX3L FUT10 ITPR1
0.00239295	16	642	3.45602	GO:0007169 transmembrane receptor protein tyrosine kinase signaling pathway	http://amigo.geneontology.org/amigo/term/GO:0007169	MUSK ERBB3 EGFR RYK TBX2 PTPRA WNT4 SVEP1 GRB2 FAT4 LRIG2 PLCG1 RAC1 CNOT9 NEDD4 LRP1
0.00239295	30	1830	2.27332	GO:0010647 positive regulation of cell communication	http://amigo.geneontology.org/amigo/term/GO:0010647	TRAF4 TRAF5 AAK1 TRAF2 TRAF3 LRRK2 GRM4 EGFR RYK UBB GAS6 CDON ERBB3 NEO1 TTC23 UBE3A KCP DGKI PTEN TBK1 CASP8 CASP1 PTBP1 NEDD4 FOXP1 VAMP7 CNOT9 ATR ROBO2 RAC1
0.00239295	4	22	25.2132	GO:0021756 striatum development	http://amigo.geneontology.org/amigo/term/GO:0021756	FOXP1 BBS1 LRRK2 FOXP2
0.00318895	5	48	14.4451	GO:0007528 neuromuscular junction development	http://amigo.geneontology.org/amigo/term/GO:0007528	NEDD4 MUSK LRP4 LRRK2 DCTN1
0.00322095	40	2867	1.93474	GO:0009653 anatomical structure morphogenesis	http://amigo.geneontology.org/amigo/term/GO:0009653	USH2A NEO1 SDK2 NEDD4 RAC1 SDK1 NEK8 RYK SVEP1 ROBO2 LRRK2 PLCG1 PTPRM CDON PTPRS KAT2A UBE3A TBX2 LIAS LRP4 FRAS1 FURIN EGFR ITPR1 MATN1 WNT4 PTEN RAPH1 BBS1 GRB2 FAT4 HEY1 FOXP1 BTG1 ZMYM3 UBB INF2 CASP8 LRP1 ATG9A
0.00338495	21	1064	2.73696	GO:0031401 positive regulation of protein modification process	http://amigo.geneontology.org/amigo/term/GO:0031401	LRRK2 TRAF4 UBE3A TRAF2 EGFR UBB PTEN KAT5 GAS6 POMT2 CDON KAT2A LRP4 PTBP1 MUSK ERBB3 RAC1 CNOT9 MRNIP SENP2 TBK1
0.00338495	26	1504	2.39727	GO:0032270 positive regulation of cellular protein metabolic process	http://amigo.geneontology.org/amigo/term/GO:0032270	CASP8 FURIN LRRK2 TRAF4 UBE3A TRAF2 EGFR UBB PTEN KAT5 GAS6 POMT2 CDON KAT2A LRP4 CASP1 NLRP3 PTBP1 MUSK ERBB3 LRP1 RAC1 CNOT9 MRNIP SENP2 TBK1
0.00340589	9	219	5.69888	GO:0006282 regulation of DNA repair	http://amigo.geneontology.org/amigo/term/GO:0006282	KAT2A KAT5 ATR SLF1 EGFR PCNA MRNIP DTX3L H2AX
0.00340589	26	1514	2.38143	GO:0009057 macromolecule catabolic process	http://amigo.geneontology.org/amigo/term/GO:0009057	JKAMP NEDD4 TRIM2 TRIM3 UBE3A HELZ2 CUL4B NEMF UBB LTN1 SMG5 FURIN CNOT9 EGFR PTEN NSUN2 TRAF4 TRAF5 TRAF2 LRRK2 LRIG2 CASP8 NSF LRP1 DTX3L KAT5
0.00340589	32	2086	2.12729	GO:0009888 tissue development	http://amigo.geneontology.org/amigo/term/GO:0009888	USH2A SVEP1 WNT4 GAS6 NSUN2 CDON ERBB3 TLL2 PTPRS KAT2A FOXP1 TBX2 LIAS LRP4 FRAS1 EGFR MATN1 RYK UBB PTEN KAT5 BBS1 GRB2 NBR1 FAT4 PCNA ANXA4 BTG1 ROBO2 HEY1 RAC1 DMBT1
0.00340589	3	9	46.2242	GO:0048312 intracellular distribution of mitochondria	http://amigo.geneontology.org/amigo/term/GO:0048312	KAT2A ARMC1 LRRK2
0.00340589	8	170	6.52578	GO:2001022 positive regulation of response to DNA damage stimulus	http://amigo.geneontology.org/amigo/term/GO:2001022	SLF1 EGFR KAT5 PCNA MRNIP DTX3L ATR H2AX
0.00346835	26	1522	2.36892	GO:0048699 generation of neurons	http://amigo.geneontology.org/amigo/term/GO:0048699	NEO1 NEDD4 LRP4 RAC1 WNT4 RYK HEY1 ROBO2 LRRK2 USH2A PTPRM CDON SDK2 IFT27 PTPRS UBE3A PIGT SDK1 CUL4B UBB PTEN RAPH1 BBS1 GAS6 FAT4 LRIG2
0.00376963	23	1263	2.52531	GO:0044265 cellular macromolecule catabolic process	http://amigo.geneontology.org/amigo/term/GO:0044265	JKAMP NEDD4 TRIM2 TRIM3 UBE3A HELZ2 CUL4B NEMF UBB LTN1 SMG5 CNOT9 FURIN PTEN NSUN2 TRAF4 TRAF5 TRAF2 LRRK2 CASP8 LRP1 DTX3L KAT5
0.00376963	9	226	5.52237	GO:0050807 regulation of synapse organization	http://amigo.geneontology.org/amigo/term/GO:0050807	NEDD4 LRRK2 PTPRS UBE3A LRP4 PTEN DCTN1 MUSK ROBO2
0.00389544	25	1449	2.39256	GO:0030182 neuron differentiation	http://amigo.geneontology.org/amigo/term/GO:0030182	NEO1 NEDD4 RAC1 WNT4 RYK HEY1 ROBO2 LRRK2 USH2A PTPRM CDON SDK2 IFT27 PTPRS UBE3A PIGT LRP4 SDK1 CUL4B UBB PTEN RAPH1 BBS1 FAT4 LRIG2
0.00389544	23	1271	2.50942	GO:0060429 epithelium development	http://amigo.geneontology.org/amigo/term/GO:0060429	WNT4 NSUN2 USH2A PTPRS KAT2A TBX2 LIAS LRP4 FRAS1 EGFR RYK KAT5 GRB2 FAT4 PCNA ANXA4 FOXP1 BTG1 PTEN ROBO2 HEY1 RAC1 DMBT1
0.00401013	21	1105	2.63541	GO:0009887 animal organ morphogenesis	http://amigo.geneontology.org/amigo/term/GO:0009887	USH2A SDK2 SDK1 NEK8 CDON TBX2 LRP4 FRAS1 EGFR MATN1 WNT4 RYK PTEN BBS1 LRRK2 FAT4 PTPRM HEY1 ROBO2 ATG9A RAC1
0.00401013	4	28	19.8104	GO:0021544 subpallium development	http://amigo.geneontology.org/amigo/term/GO:0021544	FOXP1 BBS1 LRRK2 FOXP2
0.00401013	7	132	7.35386	GO:0045739 positive regulation of DNA repair	http://amigo.geneontology.org/amigo/term/GO:0045739	SLF1 EGFR KAT5 PCNA MRNIP DTX3L H2AX
0.00401013	9	232	5.37955	GO:0050803 regulation of synapse structure or activity	http://amigo.geneontology.org/amigo/term/GO:0050803	NEDD4 LRRK2 PTPRS UBE3A LRP4 PTEN DCTN1 MUSK ROBO2
0.00409415	20	1025	2.70581	GO:0007167 enzyme linked receptor protein signaling pathway	http://amigo.geneontology.org/amigo/term/GO:0007167	MUSK ERBB3 EGFR RYK NEO1 TBX2 PTPRA KCP WNT4 SVEP1 GRB2 GAS6 FAT4 LRIG2 PLCG1 RAC1 CNOT9 NEDD4 LRP1 FURIN
0.00457618	18	869	2.87239	GO:0061024 membrane organization	http://amigo.geneontology.org/amigo/term/GO:0061024	ABCB1 GOSR2 VAMP7 RAC1 MITD1 STX8 ABCA1 GAS6 LRP4 STAR PTEN FAT4 ATG9A DCTN1 MUSK NSF AAK1 EGFR
0.00458964	29	1857	2.16559	GO:1902531 regulation of intracellular signal transduction	http://amigo.geneontology.org/amigo/term/GO:1902531	TRAF4 TRAF5 NPRL2 TRAF2 TRAF3 PTEN LRRK2 GRM4 EGFR ITPR1 NEK8 RYK UBB GAS6 CDON ERBB3 UBE3A HELLS DGKI GRB2 NBR1 CASP8 CASP1 TBK1 PTBP1 NEDD4 ABCA1 ATR RAC1
0.00459402	21	1124	2.59086	GO:0030163 protein catabolic process	http://amigo.geneontology.org/amigo/term/GO:0030163	JKAMP NEDD4 TRIM2 TRIM3 UBE3A CUL4B NEMF UBB LTN1 FURIN EGFR PTEN TRAF4 TRAF2 LRRK2 LRIG2 CASP8 NSF LRP1 DTX3L KAT5
0.00511005	37	2680	1.91451	GO:0050793 regulation of developmental process	http://amigo.geneontology.org/amigo/term/GO:0050793	PTBP1 NEDD4 RAC1 HEY1 LRRK2 FOXP1 PLCG1 BTG1 WNT4 KAT5 GAS6 ROBO2 NSUN2 CDON ERBB3 TLL2 PTPRS KAT2A UBE3A TBX2 LRP4 SDK1 MATN1 NLRP3 RYK PTEN NBR1 FAT4 LRIG2 USH2A CASP8 EGFR ZMYM3 PTPRM INF2 MUSK ABCA1
0.00513894	7	140	6.93364	GO:0010977 negative regulation of neuron projection development	http://amigo.geneontology.org/amigo/term/GO:0010977	PTPRS UBE3A LRP4 RYK PTEN LRRK2 LRIG2
0.00542241	3	12	34.6682	GO:0002182 cytoplasmic translational elongation	http://amigo.geneontology.org/amigo/term/GO:0002182	DPH1 DPH2 NEMF
0.00566559	8	193	5.74809	GO:0007416 synapse assembly	http://amigo.geneontology.org/amigo/term/GO:0007416	SDK2 SDK1 PTPRS LRP4 PTEN MUSK ROBO2 RYK
0.00590513	8	196	5.66011	GO:0007219 Notch signaling pathway	http://amigo.geneontology.org/amigo/term/GO:0007219	AAK1 DTX3L HEY1 TBX2 WDR12 FAT4 ANXA4 ROBO2
0.00590513	17	816	2.88902	GO:0007420 brain development	http://amigo.geneontology.org/amigo/term/GO:0007420	ROBO2 CDON PTPRS KAT2A FOXP1 EGFR WNT4 RYK UBB PTEN FUT10 BBS1 H2AX LRRK2 FAT4 FOXP2 UBE3A
0.00590513	16	739	3.00239	GO:0034330 cell junction organization	http://amigo.geneontology.org/amigo/term/GO:0034330	SDK2 NEDD4 PTPRS LRP4 SDK1 LRRK2 MUSK RAC1 UBE3A PTPRA WNT4 SVEP1 PTEN DCTN1 ROBO2 RYK
0.00590513	34	2402	1.96289	GO:0044248 cellular catabolic process	http://amigo.geneontology.org/amigo/term/GO:0044248	JKAMP NEDD4 TRIM2 TRIM3 UBE3A NPRL2 LRP1 HELZ2 SNX14 EI24 CUL4B NEMF UBB NBR1 LRRK2 LTN1 ATG9A SMG5 FURIN CNOT9 PTEN KAT5 TBK1 NSUN2 TRAF4 TRAF5 PLCG1 TRAF2 MGAT1 LRIG2 CASP8 LRP4 DTX3L ITPR1
0.00590513	35	2509	1.93445	GO:0051128 regulation of cellular component organization	http://amigo.geneontology.org/amigo/term/GO:0051128	NEDD4 ASAP3 AAK1 KANK4 RAC1 MIEN1 LRRK2 SLF1 KAT2A PIF1 EGFR EI24 KAT5 ROBO2 DCTN1 MCM2 PTPRS UBE3A FOXP1 PTPRA LRP4 WNT4 RYK ABCA1 PTEN ATR GRB2 LRIG2 LRP1 TRAF2 SACS SMG5 INF2 MUSK BTG1
0.00592671	15	663	3.13739	GO:0048729 tissue morphogenesis	http://amigo.geneontology.org/amigo/term/GO:0048729	KAT2A TBX2 LIAS FRAS1 EGFR MATN1 WNT4 RYK GRB2 FAT4 FOXP1 PTEN HEY1 ROBO2 RAC1
0.00607689	3	13	32.0014	GO:0061000 negative regulation of dendritic spine development	http://amigo.geneontology.org/amigo/term/GO:0061000	PTPRS UBE3A PTEN
0.00618853	21	1166	2.49754	GO:0070647 protein modification by small protein conjugation or removal	http://amigo.geneontology.org/amigo/term/GO:0070647	NEDD4 TRAF5 TRIM2 TRIM3 UBE3A TRAF2 TRAF3 CUL4B SENP3 DTX3L SENP2 UBB UBE2F SLF1 KAT2A PTEN LRRK2 DCAF7 DCAF6 LTN1 ZBED1
0.00632724	33	2320	1.9725	GO:0008219 cell death	http://amigo.geneontology.org/amigo/term/GO:0008219	CASP8 MIEN1 EGFR API5 CASP1 KAT5 FOXP1 TRAF2 UBB GAS6 LRRK2 ERBB3 TRAF4 TRAF5 HELLS TBX2 PIGT TRAF3 EI24 ITPR1 WNT4 NGB PTEN ROBO2 LRP1 MCM2 PLCG1 BTG1 TRIM2 ATG9A TBK1 GRM4 ANXA4
0.0064245	20	1088	2.54913	GO:0009894 regulation of catabolic process	http://amigo.geneontology.org/amigo/term/GO:0009894	NEDD4 UBE3A NPRL2 LRRK2 FURIN CNOT9 EGFR UBB PTEN KAT5 TBK1 NSUN2 TRAF5 TRAF2 CUL4B LRIG2 NSF LRP1 DTX3L ITPR1
0.0064245	19	1001	2.63215	GO:0031175 neuron projection development	http://amigo.geneontology.org/amigo/term/GO:0031175	NEO1 NEDD4 RAC1 RYK ROBO2 LRRK2 PTPRM IFT27 PTPRS UBE3A LRP4 SDK1 CUL4B PTEN RAPH1 BBS1 FAT4 LRIG2 UBB
0.0064245	38	2847	1.85092	GO:0035556 intracellular signal transduction	http://amigo.geneontology.org/amigo/term/GO:0035556	TIPIN TRAF4 TRAF5 NPRL2 TRAF2 TRAF3 RAC1 DGKI MRNIP PTEN ATR GAS6 LRRK2 CASP1 ERBB3 GRM4 EGFR ITPR1 NEK8 RYK UBB KAT5 H2AX NSUN2 CDON UBE3A HELLS PLCG1 PLD2 GRB2 NBR1 FAT4 CASP8 TBK1 PTBP1 NEDD4 ABCA1 GRAP
0.0064245	12	454	3.66536	GO:0050808 synapse organization	http://amigo.geneontology.org/amigo/term/GO:0050808	SDK2 NEDD4 PTPRS LRP4 SDK1 LRRK2 MUSK UBE3A PTEN DCTN1 ROBO2 RYK
0.0064245	19	1002	2.62952	GO:0051093 negative regulation of developmental process	http://amigo.geneontology.org/amigo/term/GO:0051093	HEY1 PTBP1 GAS6 TLL2 PTPRS UBE3A FOXP1 TBX2 LRP4 WNT4 RYK PTEN NBR1 LRIG2 USH2A EGFR PTPRM ROBO2 ABCA1
0.00668982	52	4424	1.62997	GO:0006950 response to stress	http://amigo.geneontology.org/amigo/term/GO:0006950	JKAMP MCM2 TRAF4 TRAF5 NPRL2 TRAF2 TRAF3 PCNA CASP1 XPR1 CUL4B MRNIP ATR DMBT1 H2AX KAT2A SLF1 KAT5 TBK1 TRPA1 FOXP1 TBX2 EGFR ITPR1 ABCA1 LRRK2 CASP8 TIPIN PTPRS UBE3A LIAS RAB2B PIF1 DGKI WNT4 NLRP3 DTX3L STX8 PTEN GAS6 NBR1 LRIG2 NEDD4 ABCB1 VAMP7 GRB2 LRP1 ERBB3 FUT10 PLCG1 RAC1 FURIN
0.00668982	3	14	29.7156	GO:0048681 negative regulation of axon regeneration	http://amigo.geneontology.org/amigo/term/GO:0048681	PTPRS PTEN LRIG2
0.00683782	19	1011	2.60611	GO:0032446 protein modification by small protein conjugation	http://amigo.geneontology.org/amigo/term/GO:0032446	NEDD4 TRAF5 TRIM2 TRIM3 UBE3A TRAF2 TRAF3 CUL4B DTX3L UBB UBE2F SLF1 SENP2 PTEN LRRK2 DCAF7 DCAF6 LTN1 ZBED1
0.00775599	20	1110	2.49861	GO:0010629 negative regulation of gene expression	http://amigo.geneontology.org/amigo/term/GO:0010629	HELLS HELZ2 CNOT9 HELZ SMG5 LRRK2 PTBP1 FOXP1 RAC1 WNT4 KAT5 GAS6 TRAF5 TRAF2 TBK1 PTPRS FURIN EGFR ANXA4 LRP1
0.00775599	19	1025	2.57052	GO:0044087 regulation of cellular component biogenesis	http://amigo.geneontology.org/amigo/term/GO:0044087	ASAP3 KANK4 MIEN1 LRRK2 KAT2A RAC1 DCTN1 PTPRS PTPRA WNT4 ABCA1 PTEN GRB2 TRAF2 SLF1 SACS ATR MUSK ROBO2
0.00775599	46	3774	1.69023	GO:0048513 animal organ development	http://amigo.geneontology.org/amigo/term/GO:0048513	USH2A CASP8 SDK2 SDK1 NEK8 ROBO2 HEY1 FOXP1 LRP4 WNT4 KAT5 GAS6 NSUN2 CDON ERBB3 TRAF4 TLL2 IFT27 PTPRS KAT2A UBE3A HELLS TBX2 PCNA KCP FRAS1 EGFR MATN1 NLRP3 RYK UBB PTEN FUT10 BBS1 GRB2 H2AX NBR1 LRRK2 FAT4 FOXP2 MCM2 PTPRM DCTN1 GLRX5 ATG9A RAC1
0.00775599	3	15	27.7345	GO:0070571 negative regulation of neuron projection regeneration	http://amigo.geneontology.org/amigo/term/GO:0070571	PTPRS PTEN LRIG2
0.00788984	30	2065	2.01462	GO:0006915 apoptotic process	http://amigo.geneontology.org/amigo/term/GO:0006915	CASP8 MIEN1 EGFR API5 KAT5 FOXP1 TRAF2 UBB GAS6 ERBB3 TRAF4 TRAF5 HELLS TBX2 PIGT TRAF3 CASP1 EI24 ITPR1 WNT4 NGB PTEN ROBO2 MCM2 PLCG1 BTG1 LRRK2 TRIM2 GRM4 ANXA4
0.00836395	20	1123	2.46968	GO:0007417 central nervous system development	http://amigo.geneontology.org/amigo/term/GO:0007417	ROBO2 CDON PTPRS KAT2A FOXP1 EGFR CUL4B WNT4 RYK UBB PTEN FUT10 BBS1 H2AX LRRK2 FAT4 FOXP2 DCTN1 LRP1 UBE3A
0.00836395	16	781	2.84093	GO:0010564 regulation of cell cycle process	http://amigo.geneontology.org/amigo/term/GO:0010564	TIPIN MRNIP ATR SUSD2 KAT2A PTEN KAT5 H2AX NSUN2 TBX2 ECD CUL4B WNT4 SLF1 EGFR DCTN1
0.00836395	17	865	2.72536	GO:0060322 head development	http://amigo.geneontology.org/amigo/term/GO:0060322	ROBO2 CDON PTPRS KAT2A FOXP1 EGFR WNT4 RYK UBB PTEN FUT10 BBS1 H2AX LRRK2 FAT4 FOXP2 UBE3A
0.00899434	4	40	13.8673	GO:0006891 intra-Golgi vesicle-mediated transport	http://amigo.geneontology.org/amigo/term/GO:0006891	NSF GOSR2 COG8 COG4
0.00928074	26	1695	2.12713	GO:0016192 vesicle-mediated transport	http://amigo.geneontology.org/amigo/term/GO:0016192	NEDD4 NSF AP4E1 COG4 GOSR2 AAK1 LRP1 VAMP7 RAC1 STX8 LRRK2 COG8 EGFR ABCA1 GAS6 UBE3A RAB2B LRP4 DGKI PTEN DMBT1 DTX3L BBS1 GRB2 DCTN1 PLD2
0.00965084	22	1321	2.30946	GO:0022402 cell cycle process	http://amigo.geneontology.org/amigo/term/GO:0022402	MCM2 TIPIN MITD1 MRNIP HFM1 ATR DCTN1 ABCB1 SUSD2 KAT2A PTEN KAT5 H2AX NSUN2 TBX2 ECD PCNA CUL4B WNT4 UBB SLF1 EGFR
0.0102254	3	17	24.4717	GO:0048311 mitochondrion distribution	http://amigo.geneontology.org/amigo/term/GO:0048311	KAT2A ARMC1 LRRK2
0.0102254	32	2312	1.91935	GO:1901575 organic substance catabolic process	http://amigo.geneontology.org/amigo/term/GO:1901575	JKAMP NEDD4 TRIM2 TRIM3 UBE3A GALE HELZ2 CUL4B NEMF UBB LTN1 SMG5 FURIN CNOT9 EGFR PTEN NSUN2 TRAF4 TRAF5 PLCG1 TRAF2 PLD2 MGAT1 NAAA LRRK2 LRIG2 CASP8 NSF LRP1 DTX3L KAT5 FUT10
0.0115775	19	1071	2.46011	GO:0000902 cell morphogenesis	http://amigo.geneontology.org/amigo/term/GO:0000902	USH2A NEO1 NEDD4 RAC1 RYK ROBO2 LRRK2 PTPRM PTPRS UBE3A LRP4 EGFR ITPR1 MATN1 PTEN RAPH1 BBS1 ZMYM3 UBB
0.0115775	30	2127	1.95589	GO:0012501 programmed cell death	http://amigo.geneontology.org/amigo/term/GO:0012501	CASP8 MIEN1 EGFR API5 CASP1 KAT5 FOXP1 TRAF2 UBB GAS6 LRRK2 ERBB3 TRAF4 TRAF5 HELLS TBX2 PIGT TRAF3 EI24 ITPR1 WNT4 NGB PTEN ROBO2 MCM2 PLCG1 BTG1 TRIM2 GRM4 ANXA4
0.0115775	13	572	3.15165	GO:0051052 regulation of DNA metabolic process	http://amigo.geneontology.org/amigo/term/GO:0051052	TIPIN MCM2 KAT2A SLF1 KAT5 ATR PCNA PIF1 EGFR MRNIP DTX3L SMG5 H2AX
0.0119292	6	124	6.70997	GO:0033209 tumor necrosis factor-mediated signaling pathway	http://amigo.geneontology.org/amigo/term/GO:0033209	TRAF5 TRAF2 TRAF3 GAS6 CASP1 CASP8
0.0124685	28	1937	2.00456	GO:0007049 cell cycle	http://amigo.geneontology.org/amigo/term/GO:0007049	MCM2 TIPIN BTG1 MITD1 MRNIP HFM1 ATR DCTN1 ABCB1 SUSD2 KAT2A PTEN KAT5 H2AX NSUN2 HELLS TBX2 ECD PCNA HMCN1 POC5 CUL4B WNT4 UBB LMLN SLF1 WDR12 EGFR
0.0132303	17	910	2.59059	GO:0044257 cellular protein catabolic process	http://amigo.geneontology.org/amigo/term/GO:0044257	JKAMP NEDD4 TRIM2 TRIM3 UBE3A CUL4B NEMF UBB LTN1 FURIN PTEN TRAF4 LRRK2 CASP8 LRP1 DTX3L KAT5
0.0132962	3	19	21.8957	GO:2000269 regulation of fibroblast apoptotic process	http://amigo.geneontology.org/amigo/term/GO:2000269	GAS6 API5 BTG1
0.0133259	19	1089	2.41945	GO:0032101 regulation of response to external stimulus	http://amigo.geneontology.org/amigo/term/GO:0032101	CASP1 FOXP1 GAS6 ROBO2 PTPRS TRAF3 WNT4 NLRP3 RYK PTEN TBK1 LRRK2 LRIG2 DTX3L VAMP7 RAC1 CASP8 PLCG1 FURIN
0.0133259	13	585	3.08162	GO:0048667 cell morphogenesis involved in neuron differentiation	http://amigo.geneontology.org/amigo/term/GO:0048667	NEO1 NEDD4 RAC1 RYK ROBO2 LRRK2 PTPRM PTPRS UBE3A LRP4 PTEN RAPH1 BBS1
0.0137723	39	3120	1.73341	GO:0051641 cellular localization	http://amigo.geneontology.org/amigo/term/GO:0051641	NSF VAMP7 STAR STX8 BBS1 LRRK2 ATG9A DCTN1 AP4E1 IFT27 ATR NSUN2 NEDD4 SLF1 EGFR MRNIP ABCA1 UBB KAT5 GAS6 USH2A TRPA1 KAT2A LRP4 ITPR1 DGKI PTEN LRIG2 LRP1 DTX3L ARMC1 PLCG1 RAC1 NEMF MUSK FUT10 GRM4 PLD2 SMG5
0.0138498	17	918	2.56801	GO:0031329 regulation of cellular catabolic process	http://amigo.geneontology.org/amigo/term/GO:0031329	UBE3A NPRL2 LRRK2 FURIN CNOT9 UBB PTEN KAT5 TBK1 NSUN2 TRAF5 TRAF2 LRIG2 LRP1 DTX3L NEDD4 ITPR1
0.0143782	15	753	2.7624	GO:0000904 cell morphogenesis involved in differentiation	http://amigo.geneontology.org/amigo/term/GO:0000904	USH2A NEO1 NEDD4 RAC1 RYK ROBO2 LRRK2 PTPRM PTPRS UBE3A LRP4 MATN1 PTEN RAPH1 BBS1
0.0143782	5	85	8.15722	GO:0051865 protein autoubiquitination	http://amigo.geneontology.org/amigo/term/GO:0051865	UBE3A TRAF2 LRRK2 LTN1 DTX3L
0.0147674	10	373	3.71777	GO:0001655 urogenital system development	http://amigo.geneontology.org/amigo/term/GO:0001655	LRP4 IFT27 UBE3A HELLS FRAS1 WNT4 PTEN LRRK2 FAT4 ROBO2
0.0159833	4	49	11.3202	GO:0003197 endocardial cushion development	http://amigo.geneontology.org/amigo/term/GO:0003197	ERBB3 TBX2 HEY1 ROBO2
0.0163962	48	4181	1.59203	GO:0009893 positive regulation of metabolic process	http://amigo.geneontology.org/amigo/term/GO:0009893	MUSK CASP8 ERBB3 NEDD4 KAT2A NPRL2 DCAF6 EGFR RYK KAT5 LRRK2 CASP1 FURIN CNOT9 NSF TRAF4 UBE3A ECD TRAF2 HELZ2 PCNA SLF1 STAR WNT4 UBB PTEN GAS6 TBK1 ZBED1 POMT2 CDON TRAF5 TBX2 RAB2B LRP4 CUL4B NLRP3 DTX3L PTBP1 LRP1 RAC1 MRNIP SENP2 GRB2 FOXP1 HEY1 ATR H2AX
0.0163962	11	451	3.38226	GO:0042176 regulation of protein catabolic process	http://amigo.geneontology.org/amigo/term/GO:0042176	NEDD4 UBE3A FURIN EGFR UBB PTEN CUL4B LRRK2 LRIG2 NSF LRP1
0.0169779	7	190	5.109	GO:0031345 negative regulation of cell projection organization	http://amigo.geneontology.org/amigo/term/GO:0031345	PTPRS UBE3A LRP4 RYK PTEN LRRK2 LRIG2
0.0170843	43	3617	1.64858	GO:0031325 positive regulation of cellular metabolic process	http://amigo.geneontology.org/amigo/term/GO:0031325	MUSK CASP8 ERBB3 KAT2A NPRL2 DCAF6 EGFR RYK KAT5 LRRK2 FURIN CNOT9 NSF TRAF4 UBE3A ECD TRAF2 HELZ2 PCNA SLF1 STAR WNT4 UBB PTEN GAS6 TBK1 ZBED1 POMT2 CDON TBX2 LRP4 CASP1 NLRP3 DTX3L PTBP1 LRP1 RAC1 MRNIP SENP2 GRB2 HEY1 ATR H2AX
0.0174955	8	252	4.40231	GO:0016358 dendrite development	http://amigo.geneontology.org/amigo/term/GO:0016358	NEDD4 LRRK2 PTPRS UBE3A LRP4 SDK1 PTEN BBS1
0.0174955	11	457	3.33786	GO:0034329 cell junction assembly	http://amigo.geneontology.org/amigo/term/GO:0034329	SDK2 SDK1 RAC1 PTPRS PTPRA LRP4 WNT4 PTEN MUSK ROBO2 RYK
0.0174955	41	3403	1.67076	GO:0051173 positive regulation of nitrogen compound metabolic process	http://amigo.geneontology.org/amigo/term/GO:0051173	CASP8 NEDD4 KAT2A DCAF6 KAT5 FURIN CNOT9 LRRK2 TRAF4 UBE3A ECD TRAF2 HELZ2 PCNA SLF1 EGFR WNT4 UBB PTEN GAS6 TBK1 ZBED1 POMT2 CDON TBX2 LRP4 CASP1 CUL4B NLRP3 DTX3L PTBP1 MUSK ERBB3 NSF LRP1 RAC1 MRNIP SENP2 HEY1 ATR H2AX
0.0174955	2	5	55.4691	GO:0099039 sphingolipid translocation	http://amigo.geneontology.org/amigo/term/GO:0099039	ABCB1 ABCA1
0.0174955	2	5	55.4691	GO:1990116 ribosome-associated ubiquitin-dependent protein catabolic process	http://amigo.geneontology.org/amigo/term/GO:1990116	NEMF LTN1
0.0176866	6	139	5.98587	GO:0007041 lysosomal transport	http://amigo.geneontology.org/amigo/term/GO:0007041	VAMP7 NEDD4 STX8 DTX3L LRP1 LRRK2
0.0186705	26	1810	1.99198	GO:0010941 regulation of cell death	http://amigo.geneontology.org/amigo/term/GO:0010941	MIEN1 EGFR API5 KAT5 CASP8 FOXP1 TRAF2 UBB GAS6 LRRK2 ERBB3 TRAF4 TRAF5 HELLS TRAF3 CASP1 WNT4 PTEN LRP1 PLCG1 BTG1 TRIM2 ATG9A TBK1 GRM4 ANXA4
0.0192448	4	53	10.4659	GO:0051646 mitochondrion localization	http://amigo.geneontology.org/amigo/term/GO:0051646	UBB KAT2A ARMC1 LRRK2
0.0217459	5	96	7.22254	GO:0060996 dendritic spine development	http://amigo.geneontology.org/amigo/term/GO:0060996	LRRK2 PTPRS UBE3A SDK1 PTEN
0.0217826	12	550	3.02559	GO:0002009 morphogenesis of an epithelium	http://amigo.geneontology.org/amigo/term/GO:0002009	KAT2A TBX2 LIAS FRAS1 EGFR WNT4 RYK GRB2 FAT4 FOXP1 PTEN RAC1
0.021887	11	474	3.21814	GO:1901987 regulation of cell cycle phase transition	http://amigo.geneontology.org/amigo/term/GO:1901987	TIPIN MRNIP ATR SUSD2 PTEN H2AX NSUN2 TBX2 ECD CUL4B EGFR
0.0225129	17	975	2.41788	GO:0022603 regulation of anatomical structure morphogenesis	http://amigo.geneontology.org/amigo/term/GO:0022603	NEDD4 RAC1 LRRK2 PLCG1 ROBO2 PTPRS UBE3A TBX2 LRP4 WNT4 RYK PTEN FOXP1 BTG1 ZMYM3 PTPRM INF2
0.0225628	8	266	4.17061	GO:0000209 protein polyubiquitination	http://amigo.geneontology.org/amigo/term/GO:0000209	NEDD4 TRAF5 TRIM2 TRIM3 UBE3A TRAF2 TRAF3 DTX3L
0.0225628	13	634	2.84345	GO:0006897 endocytosis	http://amigo.geneontology.org/amigo/term/GO:0006897	NEDD4 AP4E1 AAK1 LRP1 RAC1 EGFR UBE3A LRP4 ABCA1 DMBT1 LRRK2 GRB2 VAMP7
0.0234668	3	25	16.6407	GO:0044346 fibroblast apoptotic process	http://amigo.geneontology.org/amigo/term/GO:0044346	GAS6 API5 BTG1
0.0234668	4	57	9.73142	GO:0060998 regulation of dendritic spine development	http://amigo.geneontology.org/amigo/term/GO:0060998	PTPRS UBE3A SDK1 PTEN
0.0234668	2	6	46.2242	GO:1904396 regulation of neuromuscular junction development	http://amigo.geneontology.org/amigo/term/GO:1904396	DCTN1 MUSK
0.0241452	19	1169	2.25388	GO:0048666 neuron development	http://amigo.geneontology.org/amigo/term/GO:0048666	NEO1 NEDD4 RAC1 RYK ROBO2 LRRK2 PTPRM IFT27 PTPRS UBE3A LRP4 SDK1 CUL4B UBB PTEN RAPH1 BBS1 FAT4 LRIG2
0.0246505	4	58	9.56364	GO:0035904 aorta development	http://amigo.geneontology.org/amigo/term/GO:0035904	TBX2 LRP1 HEY1 ROBO2
0.0247902	8	272	4.07861	GO:0071356 cellular response to tumor necrosis factor	http://amigo.geneontology.org/amigo/term/GO:0071356	TRAF5 TRAF2 TRAF3 GAS6 KAT2A FOXP1 CASP1 CASP8
0.0250575	27	1964	1.9064	GO:0006508 proteolysis	http://amigo.geneontology.org/amigo/term/GO:0006508	JKAMP CASP8 NEDD4 TLL2 TRIM2 TRIM3 UBE3A FURIN CUL4B SENP3 SENP2 NEMF UBB LTN1 LRP1 LRRK2 KAT2A CASP1 PTEN GAS6 TRAF4 TRAF3 NLRP3 LMLN LRIG2 DTX3L KAT5
0.0250824	13	647	2.78631	GO:0048812 neuron projection morphogenesis	http://amigo.geneontology.org/amigo/term/GO:0048812	NEO1 NEDD4 RAC1 RYK ROBO2 LRRK2 PTPRM PTPRS UBE3A LRP4 PTEN RAPH1 UBB
0.0250824	9	341	3.65998	GO:2001020 regulation of response to DNA damage stimulus	http://amigo.geneontology.org/amigo/term/GO:2001020	KAT2A KAT5 ATR SLF1 EGFR PCNA MRNIP DTX3L H2AX
0.0262949	6	155	5.36798	GO:0009411 response to UV	http://amigo.geneontology.org/amigo/term/GO:0009411	CUL4B PCNA EGFR TIPIN NEDD4 ATR
0.0262949	44	3847	1.58607	GO:0010604 positive regulation of macromolecule metabolic process	http://amigo.geneontology.org/amigo/term/GO:0010604	CASP8 NEDD4 KAT2A DCAF6 KAT5 CASP1 FURIN CNOT9 LRRK2 NSF TRAF4 UBE3A ECD TRAF2 HELZ2 PCNA SLF1 EGFR WNT4 UBB PTEN GAS6 TBK1 ZBED1 POMT2 CDON ERBB3 TRAF5 TBX2 RAB2B LRP4 CUL4B NLRP3 DTX3L PTBP1 MUSK LRP1 RAC1 MRNIP SENP2 FOXP1 HEY1 ATR H2AX
0.0262949	37	3057	1.67841	GO:0010605 negative regulation of macromolecule metabolic process	http://amigo.geneontology.org/amigo/term/GO:0010605	TIPIN FOXP1 HELLS FOXP2 HELZ2 FOXP4 CNOT9 KAT5 MAF1 HELZ SMG5 LRP1 LRRK2 PTBP1 TBX2 ZMYM2 RAC1 PIF1 FURIN EGFR WNT4 SENP2 HEY1 PTEN GAS6 NSUN2 TRAF5 TRAF2 PCNA PCBP3 TBK1 LRIG2 NEDD4 PTPRS DTX3L ATR ANXA4
0.0262949	3	27	15.4081	GO:0010842 retina layer formation	http://amigo.geneontology.org/amigo/term/GO:0010842	SDK2 SDK1 PTPRM
0.0262949	21	1375	2.11791	GO:0018193 peptidyl-amino acid modification	http://amigo.geneontology.org/amigo/term/GO:0018193	KAT2A DPH1 DPH2 SENP3 SENP2 TBK1 SLF1 KAT5 MGAT1 EGFR ATR GAS6 LRRK2 MUSK ERBB3 LIAS LRP4 RYK ZBED1 CNOT9 PTEN
0.0262949	9	346	3.60709	GO:0071214 cellular response to abiotic stimulus	http://amigo.geneontology.org/amigo/term/GO:0071214	CASP1 CUL4B PCNA ATR H2AX CASP8 NEDD4 PTEN GRB2
0.0262949	9	346	3.60709	GO:0104004 cellular response to environmental stimulus	http://amigo.geneontology.org/amigo/term/GO:0104004	CASP1 CUL4B PCNA ATR H2AX CASP8 NEDD4 PTEN GRB2
0.027012	17	1006	2.34338	GO:0040007 growth	http://amigo.geneontology.org/amigo/term/GO:0040007	EGFR EI24 TLL2 PTPRS KAT2A UBE3A FOXP1 TBX2 LRP4 MATN1 RYK PTEN KAT5 RAPH1 GAS6 MUSK BTG1
0.027012	42	3630	1.60448	GO:0044085 cellular component biogenesis	http://amigo.geneontology.org/amigo/term/GO:0044085	RRP12 SDK2 ASAP3 COG4 HELLS KANK4 RAC1 WDR12 MIEN1 SDK1 NSA2 TEKT1 BBS1 LRRK2 ATG9A IFT27 GLRX5 TRPA1 KAT2A DCTN1 MCM2 PTPRS UTP20 TRAF2 PTPRA LRP4 CUL4B WNT4 NLRP3 ABCA1 PTEN GRB2 GAS6 SLF1 SACS NEMF ATR MUSK ROBO2 RYK H2AX MATN1
0.0271303	16	922	2.40647	GO:0001817 regulation of cytokine production	http://amigo.geneontology.org/amigo/term/GO:0001817	CASP1 FOXP1 RAC1 FURIN KAT5 GAS6 TBK1 KAT2A RAB2B TRAF3 NLRP3 LRRK2 CASP8 PTPRS TRAF2 ANXA4
0.0271303	2	7	39.6208	GO:0017182 peptidyl-diphthamide metabolic process	http://amigo.geneontology.org/amigo/term/GO:0017182	DPH1 DPH2
0.0271303	2	7	39.6208	GO:0017183 peptidyl-diphthamide biosynthetic process from peptidyl-histidine	http://amigo.geneontology.org/amigo/term/GO:0017183	DPH1 DPH2
0.0271303	3	28	14.8578	GO:0032801 receptor catabolic process	http://amigo.geneontology.org/amigo/term/GO:0032801	NEDD4 FURIN DTX3L
0.0271303	2	7	39.6208	GO:0051124 synaptic assembly at neuromuscular junction	http://amigo.geneontology.org/amigo/term/GO:0051124	LRP4 MUSK
0.0271303	14	745	2.60593	GO:0051129 negative regulation of cellular component organization	http://amigo.geneontology.org/amigo/term/GO:0051129	KANK4 LRRK2 KAT2A PIF1 MCM2 PTPRS UBE3A LRP4 RYK PTEN LRIG2 SACS ROBO2 RAC1
0.0271303	2	7	39.6208	GO:0061002 negative regulation of dendritic spine morphogenesis	http://amigo.geneontology.org/amigo/term/GO:0061002	UBE3A PTEN
0.0271303	13	662	2.72318	GO:0120039 plasma membrane bounded cell projection morphogenesis	http://amigo.geneontology.org/amigo/term/GO:0120039	NEO1 NEDD4 RAC1 RYK ROBO2 LRRK2 PTPRM PTPRS UBE3A LRP4 PTEN RAPH1 UBB
0.0271303	2	7	39.6208	GO:2000270 negative regulation of fibroblast apoptotic process	http://amigo.geneontology.org/amigo/term/GO:2000270	GAS6 API5
0.0280841	16	930	2.38577	GO:0001816 cytokine production	http://amigo.geneontology.org/amigo/term/GO:0001816	CASP1 FOXP1 RAC1 FURIN KAT5 GAS6 TBK1 KAT2A RAB2B TRAF3 NLRP3 LRRK2 CASP8 PTPRS TRAF2 ANXA4
0.0280841	12	586	2.83971	GO:0009896 positive regulation of catabolic process	http://amigo.geneontology.org/amigo/term/GO:0009896	NEDD4 NPRL2 LRRK2 FURIN CNOT9 PTEN KAT5 TBK1 CUL4B NSF LRP1 DTX3L
0.0280841	4	63	8.80462	GO:0010803 regulation of tumor necrosis factor-mediated signaling pathway	http://amigo.geneontology.org/amigo/term/GO:0010803	GAS6 TRAF2 CASP1 CASP8
0.0280841	23	1594	2.00092	GO:0042981 regulation of apoptotic process	http://amigo.geneontology.org/amigo/term/GO:0042981	MIEN1 EGFR API5 KAT5 FOXP1 TRAF2 UBB GAS6 CASP8 ERBB3 TRAF4 TRAF5 HELLS TRAF3 CASP1 WNT4 PTEN PLCG1 BTG1 LRRK2 TRIM2 GRM4 ANXA4
0.0280841	24	1700	1.95773	GO:0045595 regulation of cell differentiation	http://amigo.geneontology.org/amigo/term/GO:0045595	PTBP1 HEY1 FOXP1 BTG1 RAC1 WNT4 KAT5 GAS6 ROBO2 NSUN2 CDON PTPRS KAT2A LRP4 NLRP3 RYK PTEN NBR1 FAT4 USH2A CASP8 EGFR LRRK2 ABCA1
0.0280841	5	108	6.42003	GO:0048144 fibroblast proliferation	http://amigo.geneontology.org/amigo/term/GO:0048144	GAS6 KAT2A DPH1 ECD EGFR
0.0280841	5	109	6.36113	GO:0048640 negative regulation of developmental growth	http://amigo.geneontology.org/amigo/term/GO:0048640	TLL2 PTPRS FOXP1 RYK PTEN
0.0280841	3	29	14.3455	GO:0048679 regulation of axon regeneration	http://amigo.geneontology.org/amigo/term/GO:0048679	PTPRS PTEN LRIG2
0.0280841	13	667	2.70277	GO:0048858 cell projection morphogenesis	http://amigo.geneontology.org/amigo/term/GO:0048858	NEO1 NEDD4 RAC1 RYK ROBO2 LRRK2 PTPRM PTPRS UBE3A LRP4 PTEN RAPH1 UBB
0.0280841	7	221	4.39235	GO:1901888 regulation of cell junction assembly	http://amigo.geneontology.org/amigo/term/GO:1901888	RAC1 PTPRS PTPRA WNT4 PTEN MUSK ROBO2
0.0290229	16	937	2.36794	GO:0016567 protein ubiquitination	http://amigo.geneontology.org/amigo/term/GO:0016567	NEDD4 TRAF5 TRIM2 TRIM3 UBE3A TRAF2 TRAF3 CUL4B DTX3L UBB SENP2 PTEN LRRK2 DCAF7 DCAF6 LTN1
0.0290229	23	1606	1.98597	GO:0030030 cell projection organization	http://amigo.geneontology.org/amigo/term/GO:0030030	NEO1 NEDD4 RAC1 MIEN1 RYK TEKT1 BBS1 ROBO2 LRRK2 IFT27 PTPRM PTPRS KAT2A UBE3A LRP4 SDK1 CUL4B PTEN RAPH1 FAT4 LRIG2 UBB DCTN1
0.0290229	4	65	8.53371	GO:0043112 receptor metabolic process	http://amigo.geneontology.org/amigo/term/GO:0043112	NEDD4 NSF FURIN DTX3L
0.0290229	4	65	8.53371	GO:0051893 regulation of focal adhesion assembly	http://amigo.geneontology.org/amigo/term/GO:0051893	RAC1 PTPRA WNT4 PTEN
0.0290229	4	65	8.53371	GO:0090109 regulation of cell-substrate junction assembly	http://amigo.geneontology.org/amigo/term/GO:0090109	RAC1 PTPRA WNT4 PTEN
0.0291603	14	761	2.55114	GO:0019941 modification-dependent protein catabolic process	http://amigo.geneontology.org/amigo/term/GO:0019941	JKAMP NEDD4 TRIM2 TRIM3 UBE3A CUL4B NEMF UBB LTN1 PTEN TRAF4 LRRK2 DTX3L KAT5
0.0291875	18	1123	2.22272	GO:0035295 tube development	http://amigo.geneontology.org/amigo/term/GO:0035295	PLCG1 TRAF4 KAT2A TBX2 LIAS EGFR WNT4 UBB PTEN KAT5 FAT4 HEY1 FOXP1 BTG1 PTPRM ROBO2 CASP8 LRP1
0.0299116	4	66	8.40441	GO:0050771 negative regulation of axonogenesis	http://amigo.geneontology.org/amigo/term/GO:0050771	PTPRS LRP4 RYK PTEN
0.0299116	5	112	6.19075	GO:0070167 regulation of biomineral tissue development	http://amigo.geneontology.org/amigo/term/GO:0070167	WNT4 GAS6 MATN1 NBR1 HEY1
0.0304963	12	598	2.78273	GO:0007507 heart development	http://amigo.geneontology.org/amigo/term/GO:0007507	HEY1 ERBB3 KAT2A FOXP1 TBX2 PCNA NEK8 PTEN FAT4 EGFR CASP8 ROBO2
0.0304963	12	598	2.78273	GO:0044770 cell cycle phase transition	http://amigo.geneontology.org/amigo/term/GO:0044770	TIPIN MRNIP ATR ABCB1 SUSD2 PTEN H2AX NSUN2 TBX2 ECD CUL4B EGFR
0.0309364	4	67	8.27897	GO:0060042 retina morphogenesis in camera-type eye	http://amigo.geneontology.org/amigo/term/GO:0060042	SDK2 SDK1 CDON PTPRM
0.0309364	2	8	34.6682	GO:0150094 amyloid-beta clearance by cellular catabolic process	http://amigo.geneontology.org/amigo/term/GO:0150094	LRP1 LRP4
0.0310638	18	1138	2.19342	GO:0006259 DNA metabolic process	http://amigo.geneontology.org/amigo/term/GO:0006259	MCM2 TIPIN TOP3B HELLS PCNA PIF1 HFM1 ATR KAT2A SLF1 KAT5 EGFR CUL4B MRNIP SANBR DTX3L H2AX SMG5
0.0310638	13	686	2.62791	GO:0032990 cell part morphogenesis	http://amigo.geneontology.org/amigo/term/GO:0032990	NEO1 NEDD4 RAC1 RYK ROBO2 LRRK2 PTPRM PTPRS UBE3A LRP4 PTEN RAPH1 UBB
0.0310638	37	3133	1.63769	GO:0033036 macromolecule localization	http://amigo.geneontology.org/amigo/term/GO:0033036	NSF ABCB1 STAR ABCA1 STX8 BBS1 LRRK2 ATG9A AP4E1 ATR NSUN2 AAK1 SLF1 EGFR MRNIP GAS6 USH2A IFT27 COG4 GOSR2 TRIM3 VAMP7 RAB2B LRP4 SNX14 FRAS1 FURIN DTX3L SENP2 DMBT1 LRIG2 COG8 LRP1 NEDD4 MUSK FUT10 SMG5
0.0310638	8	298	3.72276	GO:0034612 response to tumor necrosis factor	http://amigo.geneontology.org/amigo/term/GO:0034612	TRAF5 TRAF2 TRAF3 GAS6 KAT2A FOXP1 CASP8 CASP1
0.0310638	23	1627	1.96034	GO:0043067 regulation of programmed cell death	http://amigo.geneontology.org/amigo/term/GO:0043067	MIEN1 EGFR API5 KAT5 CASP8 FOXP1 TRAF2 UBB GAS6 LRRK2 ERBB3 TRAF4 TRAF5 HELLS TRAF3 CASP1 WNT4 PTEN PLCG1 BTG1 TRIM2 GRM4 ANXA4
0.0310638	14	772	2.51479	GO:0043632 modification-dependent macromolecule catabolic process	http://amigo.geneontology.org/amigo/term/GO:0043632	JKAMP NEDD4 TRIM2 TRIM3 UBE3A CUL4B NEMF UBB LTN1 PTEN TRAF4 LRRK2 DTX3L KAT5
0.0310638	34	2795	1.6869	GO:0051246 regulation of protein metabolic process	http://amigo.geneontology.org/amigo/term/GO:0051246	CASP8 NEDD4 DPH1 UBE3A DPH2 CNOT9 LRP1 FURIN LRRK2 TRAF4 TRAF2 EGFR SENP2 UBB PTEN KAT5 GAS6 POMT2 CDON KAT2A TRAF3 LRP4 CASP1 CUL4B NLRP3 LRIG2 PTBP1 MUSK ERBB3 NSF RAC1 MRNIP DTX3L TBK1
0.0310638	3	31	13.4199	GO:0099068 postsynapse assembly	http://amigo.geneontology.org/amigo/term/GO:0099068	PTPRS LRP4 PTEN
0.0310638	5	114	6.08214	GO:0110149 regulation of biomineralization	http://amigo.geneontology.org/amigo/term/GO:0110149	WNT4 GAS6 MATN1 NBR1 HEY1
0.0321264	4	69	8.039	GO:0006414 translational elongation	http://amigo.geneontology.org/amigo/term/GO:0006414	DPH1 DPH2 NEMF LTN1
0.0321264	3	32	13.0006	GO:0035909 aorta morphogenesis	http://amigo.geneontology.org/amigo/term/GO:0035909	TBX2 LRP1 HEY1
0.0321264	3	32	13.0006	GO:0070570 regulation of neuron projection regeneration	http://amigo.geneontology.org/amigo/term/GO:0070570	PTPRS PTEN LRIG2
0.032221	6	172	4.83742	GO:0007156 homophilic cell adhesion via plasma membrane adhesion molecules	http://amigo.geneontology.org/amigo/term/GO:0007156	SDK2 HMCN1 SDK1 PTPRM ROBO2 FAT4
0.0325185	5	117	5.92618	GO:0014066 regulation of phosphatidylinositol 3-kinase signaling	http://amigo.geneontology.org/amigo/term/GO:0014066	UBE3A NEDD4 EGFR PTEN ERBB3
0.0325185	11	528	2.88902	GO:0043410 positive regulation of MAPK cascade	http://amigo.geneontology.org/amigo/term/GO:0043410	TRAF4 TRAF5 TRAF2 TRAF3 LRRK2 GRM4 EGFR RYK GAS6 CDON PTEN
0.0327053	6	174	4.78182	GO:0009267 cellular response to starvation	http://amigo.geneontology.org/amigo/term/GO:0009267	NPRL2 XPR1 KAT5 WNT4 GAS6 LRRK2
0.0327053	49	4552	1.49274	GO:0030154 cell differentiation	http://amigo.geneontology.org/amigo/term/GO:0030154	PTBP1 USH2A CASP8 NEO1 NEDD4 TBX2 LRP4 RAC1 EGFR WNT4 RYK HEY1 ROBO2 LRRK2 FOXP1 BTG1 KAT5 PTPRM GAS6 MUSK NSUN2 CDON ERBB3 SDK2 TLL2 IFT27 PTPRS KAT2A UBE3A PIGT KCP SDK1 CUL4B MATN1 NLRP3 UBB PTEN RAPH1 BBS1 GRB2 DMBT1 NBR1 FAT4 LRIG2 PCNA ANXA4 LRP1 SENP2 ABCA1
0.0327053	23	1641	1.94362	GO:0031399 regulation of protein modification process	http://amigo.geneontology.org/amigo/term/GO:0031399	LRRK2 TRAF4 UBE3A TRAF2 EGFR SENP2 UBB PTEN KAT5 GAS6 POMT2 CDON KAT2A LRP4 PTBP1 MUSK ERBB3 RAC1 CNOT9 MRNIP DTX3L LRP1 TBK1
0.0327053	13	697	2.58644	GO:0071363 cellular response to growth factor stimulus	http://amigo.geneontology.org/amigo/term/GO:0071363	PLCG1 NEO1 KAT2A UBE3A TBX2 KCP EGFR WNT4 GRB2 GAS6 FAT4 NEDD4 FURIN
0.0327053	18	1150	2.17053	GO:0072359 circulatory system development	http://amigo.geneontology.org/amigo/term/GO:0072359	HEY1 SVEP1 PLCG1 ERBB3 KAT2A FOXP1 TBX2 PCNA NEK8 PTEN FAT4 BTG1 EGFR WNT4 PTPRM CASP8 LRP1 ROBO2
0.0327053	4	70	7.92416	GO:0150116 regulation of cell-substrate junction organization	http://amigo.geneontology.org/amigo/term/GO:0150116	RAC1 PTPRA WNT4 PTEN
0.033794	4	71	7.81255	GO:0070534 protein K63-linked ubiquitination	http://amigo.geneontology.org/amigo/term/GO:0070534	TRAF5 TRAF2 TRAF3 NEDD4
0.0339636	2	9	30.8162	GO:0000301 retrograde transport vesicle recycling within Golgi	http://amigo.geneontology.org/amigo/term/GO:0000301	COG4 COG8
0.0339636	2	9	30.8162	GO:0050847 progesterone receptor signaling pathway	http://amigo.geneontology.org/amigo/term/GO:0050847	NEDD4 UBE3A
0.0339636	15	880	2.36374	GO:0051603 proteolysis involved in cellular protein catabolic process	http://amigo.geneontology.org/amigo/term/GO:0051603	JKAMP NEDD4 TRIM2 TRIM3 UBE3A CUL4B NEMF UBB LTN1 PTEN TRAF4 LRRK2 CASP8 DTX3L KAT5
0.0339636	32	2609	1.70085	GO:0071310 cellular response to organic substance	http://amigo.geneontology.org/amigo/term/GO:0071310	TRAF5 TRAF2 TRAF3 LRRK2 TBK1 NEDD4 UBE3A FOXP1 PLCG1 CASP1 EGFR KAT5 GAS6 CASP8 NEO1 MCM2 TRPA1 KAT2A HELLS TBX2 PTPRA KCP CNOT9 WNT4 NLRP3 ABCA1 STX8 GRB2 FAT4 ROBO2 LRP1 FURIN
0.0339636	2	9	30.8162	GO:0072344 rescue of stalled ribosome	http://amigo.geneontology.org/amigo/term/GO:0072344	NEMF LTN1
0.0339636	2	9	30.8162	GO:0090394 negative regulation of excitatory postsynaptic potential	http://amigo.geneontology.org/amigo/term/GO:0090394	PTEN LRRK2
0.0339636	6	176	4.72748	GO:0099173 postsynapse organization	http://amigo.geneontology.org/amigo/term/GO:0099173	LRRK2 PTPRS UBE3A LRP4 PTEN MUSK
0.0340702	38	3283	1.60511	GO:0009892 negative regulation of metabolic process	http://amigo.geneontology.org/amigo/term/GO:0009892	TIPIN FOXP1 HELLS FOXP2 HELZ2 FOXP4 CNOT9 KAT5 MAF1 LRRK2 HELZ SMG5 LRP1 PTBP1 NPRL2 TBX2 ZMYM2 RAC1 PIF1 FURIN EGFR WNT4 SENP2 HEY1 PTEN GAS6 NSUN2 TRAF5 TRAF2 PCNA PCBP3 TBK1 LRIG2 NEDD4 PTPRS DTX3L ATR ANXA4
0.0345316	49	4576	1.48491	GO:0048869 cellular developmental process	http://amigo.geneontology.org/amigo/term/GO:0048869	PTBP1 USH2A CASP8 NEO1 NEDD4 TBX2 LRP4 RAC1 EGFR WNT4 RYK HEY1 ROBO2 LRRK2 FOXP1 BTG1 KAT5 PTPRM GAS6 MUSK NSUN2 CDON ERBB3 SDK2 TLL2 IFT27 PTPRS KAT2A UBE3A PIGT KCP SDK1 CUL4B MATN1 NLRP3 UBB PTEN RAPH1 BBS1 GRB2 DMBT1 NBR1 FAT4 LRIG2 PCNA ANXA4 LRP1 SENP2 ABCA1
0.0346478	6	178	4.67436	GO:0007034 vacuolar transport	http://amigo.geneontology.org/amigo/term/GO:0007034	VAMP7 NEDD4 STX8 DTX3L LRP1 LRRK2
0.0348883	4	73	7.59851	GO:0001961 positive regulation of cytokine-mediated signaling pathway	http://amigo.geneontology.org/amigo/term/GO:0001961	TRAF2 TBK1 CASP1 GAS6
0.0348883	5	122	5.68331	GO:0031398 positive regulation of protein ubiquitination	http://amigo.geneontology.org/amigo/term/GO:0031398	UBE3A UBB PTEN LRRK2 SENP2
0.0348883	5	122	5.68331	GO:0038127 ERBB signaling pathway	http://amigo.geneontology.org/amigo/term/GO:0038127	EGFR ERBB3 GRB2 PLCG1 CNOT9
0.0348883	12	622	2.67536	GO:0051347 positive regulation of transferase activity	http://amigo.geneontology.org/amigo/term/GO:0051347	MUSK ERBB3 EGFR RYK LRRK2 TRAF4 TRAF2 DTX3L PTEN GAS6 PCNA MRNIP
0.0356505	22	1563	1.95189	GO:0120036 plasma membrane bounded cell projection organization	http://amigo.geneontology.org/amigo/term/GO:0120036	NEO1 NEDD4 RAC1 MIEN1 RYK TEKT1 BBS1 ROBO2 LRRK2 IFT27 PTPRM PTPRS UBE3A LRP4 SDK1 CUL4B PTEN RAPH1 FAT4 LRIG2 UBB DCTN1
0.0384186	5	125	5.54691	GO:0042542 response to hydrogen peroxide	http://amigo.geneontology.org/amigo/term/GO:0042542	TRPA1 UBE3A FOXP1 PCNA LRRK2
0.0385704	16	992	2.23666	GO:0006974 cellular response to DNA damage stimulus	http://amigo.geneontology.org/amigo/term/GO:0006974	MCM2 PCNA CUL4B MRNIP ATR H2AX KAT2A SLF1 KAT5 EGFR TIPIN PIF1 DTX3L NEDD4 FOXP1 GRB2
0.0385704	32	2642	1.67961	GO:0008104 protein localization	http://amigo.geneontology.org/amigo/term/GO:0008104	NSF STX8 BBS1 LRRK2 ATG9A AP4E1 AAK1 SLF1 EGFR MRNIP GAS6 USH2A IFT27 COG4 GOSR2 TRIM3 VAMP7 RAB2B LRP4 SNX14 FRAS1 DTX3L SENP2 ABCA1 DMBT1 LRIG2 COG8 LRP1 ATR NEDD4 MUSK FUT10
0.0385704	2	10	27.7345	GO:0016926 protein desumoylation	http://amigo.geneontology.org/amigo/term/GO:0016926	SENP3 SENP2
0.0385704	2	10	27.7345	GO:0034351 negative regulation of glial cell apoptotic process	http://amigo.geneontology.org/amigo/term/GO:0034351	GAS6 TRAF2
0.0385704	13	719	2.5073	GO:0043408 regulation of MAPK cascade	http://amigo.geneontology.org/amigo/term/GO:0043408	TRAF4 TRAF5 TRAF2 TRAF3 LRRK2 GRM4 EGFR RYK GAS6 CDON PTEN GRB2 NBR1
0.0385704	8	317	3.49963	GO:0051054 positive regulation of DNA metabolic process	http://amigo.geneontology.org/amigo/term/GO:0051054	PCNA SLF1 EGFR KAT5 MRNIP DTX3L ATR H2AX
0.0385704	2	10	27.7345	GO:0097400 interleukin-17-mediated signaling pathway	http://amigo.geneontology.org/amigo/term/GO:0097400	TRAF5 TRAF2
0.0385704	2	10	27.7345	GO:1900247 regulation of cytoplasmic translational elongation	http://amigo.geneontology.org/amigo/term/GO:1900247	DPH1 DPH2
0.0390414	10	471	2.94422	GO:0009314 response to radiation	http://amigo.geneontology.org/amigo/term/GO:0009314	CUL4B PCNA EGFR KAT5 ATR TIPIN H2AX NEDD4 MRNIP GRB2
0.0407451	13	726	2.48312	GO:0070848 response to growth factor	http://amigo.geneontology.org/amigo/term/GO:0070848	PLCG1 NEO1 KAT2A UBE3A TBX2 KCP EGFR WNT4 GRB2 GAS6 FAT4 NEDD4 FURIN
0.0407998	8	322	3.44529	GO:0001822 kidney development	http://amigo.geneontology.org/amigo/term/GO:0001822	LRP4 IFT27 HELLS FRAS1 WNT4 LRRK2 FAT4 ROBO2
0.0410138	24	1795	1.85412	GO:0045184 establishment of protein localization	http://amigo.geneontology.org/amigo/term/GO:0045184	NSF STX8 AP4E1 LRRK2 GAS6 USH2A IFT27 COG4 GOSR2 TRIM3 VAMP7 RAB2B SNX14 FRAS1 DTX3L SENP2 ABCA1 BBS1 DMBT1 COG8 NEDD4 LRP1 FUT10 EGFR
0.043029	3	38	10.9478	GO:0003203 endocardial cushion morphogenesis	http://amigo.geneontology.org/amigo/term/GO:0003203	TBX2 HEY1 ROBO2
0.043029	3	38	10.9478	GO:0033260 nuclear DNA replication	http://amigo.geneontology.org/amigo/term/GO:0033260	MCM2 PCNA TIPIN
0.043029	7	255	3.8067	GO:0051403 stress-activated MAPK cascade	http://amigo.geneontology.org/amigo/term/GO:0051403	TRAF4 TRAF5 TRAF2 TRAF3 LRRK2 NBR1 EGFR
0.0438106	12	649	2.56406	GO:0006281 DNA repair	http://amigo.geneontology.org/amigo/term/GO:0006281	MCM2 PCNA KAT2A SLF1 KAT5 ATR EGFR CUL4B PIF1 MRNIP DTX3L H2AX
0.0438106	6	191	4.35621	GO:0007254 JNK cascade	http://amigo.geneontology.org/amigo/term/GO:0007254	TRAF4 TRAF5 TRAF2 TRAF3 LRRK2 EGFR
0.0438106	2	11	25.2132	GO:0018202 peptidyl-histidine modification	http://amigo.geneontology.org/amigo/term/GO:0018202	DPH1 DPH2
0.0438106	2	11	25.2132	GO:0036462 TRAIL-activated apoptotic signaling pathway	http://amigo.geneontology.org/amigo/term/GO:0036462	CASP8 PTEN
0.0438106	7	257	3.77708	GO:0045926 negative regulation of growth	http://amigo.geneontology.org/amigo/term/GO:0045926	EI24 TLL2 PTPRS FOXP1 RYK PTEN BTG1
0.0438106	6	191	4.35621	GO:0048017 inositol lipid-mediated signaling	http://amigo.geneontology.org/amigo/term/GO:0048017	PTEN ERBB3 UBE3A PLD2 NEDD4 EGFR
0.0438106	2	11	25.2132	GO:0071340 skeletal muscle acetylcholine-gated channel clustering	http://amigo.geneontology.org/amigo/term/GO:0071340	LRP4 MUSK
0.0438106	2	11	25.2132	GO:2000644 regulation of receptor catabolic process	http://amigo.geneontology.org/amigo/term/GO:2000644	FURIN DTX3L
0.044355	3	39	10.6671	GO:0000460 maturation of 5.8S rRNA	http://amigo.geneontology.org/amigo/term/GO:0000460	WDR12 NSA2 UTP20
0.044355	4	81	6.84804	GO:0008543 fibroblast growth factor receptor signaling pathway	http://amigo.geneontology.org/amigo/term/GO:0008543	TBX2 WNT4 GRB2 FAT4
0.044355	4	81	6.84804	GO:0060760 positive regulation of response to cytokine stimulus	http://amigo.geneontology.org/amigo/term/GO:0060760	TRAF2 TBK1 CASP1 GAS6
0.044355	7	259	3.74791	GO:0070085 glycosylation	http://amigo.geneontology.org/amigo/term/GO:0070085	POMT2 MGAT1 ALG14 FUT10 EXTL2 COG4 COG8
0.044355	9	406	3.07403	GO:0070997 neuron death	http://amigo.geneontology.org/amigo/term/GO:0070997	UBB CASP8 ERBB3 PIGT LRRK2 TRIM2 TBK1 GRM4 TRAF2
0.04438	11	568	2.68556	GO:0010035 response to inorganic substance	http://amigo.geneontology.org/amigo/term/GO:0010035	CPNE8 MIEN1 TRPA1 CASP8 UBE3A FOXP1 TRAF2 PCNA EGFR LRRK2 NEDD4
0.04438	8	331	3.35161	GO:0072001 renal system development	http://amigo.geneontology.org/amigo/term/GO:0072001	LRP4 IFT27 HELLS FRAS1 WNT4 LRRK2 FAT4 ROBO2
0.0448653	8	332	3.34151	GO:0071496 cellular response to external stimulus	http://amigo.geneontology.org/amigo/term/GO:0071496	NPRL2 XPR1 KAT5 GAS6 WNT4 CASP8 CASP1 LRRK2
0.0448653	21	1510	1.92856	GO:1901565 organonitrogen compound catabolic process	http://amigo.geneontology.org/amigo/term/GO:1901565	JKAMP NEDD4 TRIM2 TRIM3 UBE3A CUL4B NEMF UBB LTN1 FURIN EGFR PTEN TRAF4 TRAF2 LRRK2 LRIG2 CASP8 NSF LRP1 DTX3L KAT5
0.0452848	12	656	2.5367	GO:0048589 developmental growth	http://amigo.geneontology.org/amigo/term/GO:0048589	TLL2 PTPRS KAT2A UBE3A FOXP1 TBX2 LRP4 MATN1 RYK PTEN RAPH1 MUSK
0.0453786	18	1213	2.0578	GO:0051726 regulation of cell cycle	http://amigo.geneontology.org/amigo/term/GO:0051726	TIPIN BTG1 MRNIP ATR SUSD2 KAT2A PTEN KAT5 H2AX NSUN2 TBX2 ECD CUL4B WNT4 SLF1 WDR12 EGFR DCTN1
0.0455812	7	262	3.705	GO:0031098 stress-activated protein kinase signaling cascade	http://amigo.geneontology.org/amigo/term/GO:0031098	TRAF4 TRAF5 TRAF2 TRAF3 LRRK2 NBR1 EGFR
0.0455812	5	135	5.13603	GO:0048593 camera-type eye morphogenesis	http://amigo.geneontology.org/amigo/term/GO:0048593	SDK2 SDK1 CDON TBX2 PTPRM
0.0462763	9	411	3.03663	GO:0001701 in utero embryonic development	http://amigo.geneontology.org/amigo/term/GO:0001701	NSUN2 KAT2A MGAT1 FURIN EGFR GRB2 PLCG1 HEY1 CASP8
0.0463826	4	83	6.68302	GO:0030301 cholesterol transport	http://amigo.geneontology.org/amigo/term/GO:0030301	STAR FURIN ABCA1 LRP1
0.0463826	12	660	2.52132	GO:0031344 regulation of cell projection organization	http://amigo.geneontology.org/amigo/term/GO:0031344	NEDD4 MIEN1 LRRK2 RAC1 ROBO2 PTPRS KAT2A UBE3A LRP4 RYK PTEN LRIG2
0.0469753	37	3269	1.56956	GO:0010033 response to organic substance	http://amigo.geneontology.org/amigo/term/GO:0010033	JKAMP TRAF5 TRAF2 TRAF3 DMBT1 LRRK2 TBK1 NEDD4 UBE3A FOXP1 PLCG1 CASP1 EGFR KAT5 GAS6 CASP8 NEO1 MCM2 TRPA1 KAT2A HELLS TBX2 LIAS PCNA PTPRA KCP CNOT9 SDK1 WNT4 NLRP3 ABCA1 STX8 GRB2 FAT4 ROBO2 LRP1 FURIN
0.047277	8	337	3.29193	GO:0010948 negative regulation of cell cycle process	http://amigo.geneontology.org/amigo/term/GO:0010948	TIPIN MRNIP ATR SUSD2 KAT2A PTEN H2AX NSUN2
0.047343	13	751	2.40046	GO:0006511 ubiquitin-dependent protein catabolic process	http://amigo.geneontology.org/amigo/term/GO:0006511	JKAMP NEDD4 TRIM2 TRIM3 UBE3A CUL4B NEMF LTN1 PTEN TRAF4 LRRK2 DTX3L KAT5
0.0478936	2	12	23.1121	GO:0034350 regulation of glial cell apoptotic process	http://amigo.geneontology.org/amigo/term/GO:0034350	GAS6 TRAF2
0.0478936	2	12	23.1121	GO:0060736 prostate gland growth	http://amigo.geneontology.org/amigo/term/GO:0060736	UBE3A PTEN
0.0483268	10	496	2.79582	GO:0043161 proteasome-mediated ubiquitin-dependent protein catabolic process	http://amigo.geneontology.org/amigo/term/GO:0043161	JKAMP NEDD4 TRIM2 TRIM3 CUL4B NEMF LTN1 TRAF4 LRRK2 KAT5
0.0484397	7	267	3.63561	GO:0045732 positive regulation of protein catabolic process	http://amigo.geneontology.org/amigo/term/GO:0045732	NEDD4 FURIN PTEN CUL4B LRRK2 NSF LRP1
0.0487988	6	200	4.16018	GO:0071478 cellular response to radiation	http://amigo.geneontology.org/amigo/term/GO:0071478	CUL4B PCNA ATR H2AX NEDD4 GRB2
0.0498278	3	42	9.90519	GO:0044786 cell cycle DNA replication	http://amigo.geneontology.org/amigo/term/GO:0044786	MCM2 PCNA TIPIN
0.050776	6	202	4.11899	GO:0000302 response to reactive oxygen species	http://amigo.geneontology.org/amigo/term/GO:0000302	TRPA1 UBE3A FOXP1 PCNA EGFR LRRK2
0.050776	11	585	2.60752	GO:0010498 proteasomal protein catabolic process	http://amigo.geneontology.org/amigo/term/GO:0010498	JKAMP NEDD4 TRIM2 TRIM3 CUL4B NEMF LTN1 UBB TRAF4 LRRK2 KAT5
0.050776	10	501	2.76792	GO:0061564 axon development	http://amigo.geneontology.org/amigo/term/GO:0061564	NEO1 RAC1 RYK ROBO2 PTPRM PTPRS LRP4 PTEN RAPH1 LRIG2
0.0507881	14	852	2.27866	GO:0060341 regulation of cellular localization	http://amigo.geneontology.org/amigo/term/GO:0060341	LRRK2 NSUN2 NEDD4 EGFR STX8 KAT5 GAS6 LRP4 PTEN LRIG2 LRP1 DTX3L PLCG1 VAMP7
0.0508845	6	203	4.0987	GO:0032872 regulation of stress-activated MAPK cascade	http://amigo.geneontology.org/amigo/term/GO:0032872	TRAF4 TRAF5 TRAF2 TRAF3 NBR1 EGFR
0.0508845	5	141	4.91747	GO:1903322 positive regulation of protein modification by small protein conjugation or removal	http://amigo.geneontology.org/amigo/term/GO:1903322	UBE3A UBB PTEN LRRK2 SENP2
0.0508845	5	141	4.91747	GO:2000779 regulation of double-strand break repair	http://amigo.geneontology.org/amigo/term/GO:2000779	KAT5 ATR SLF1 MRNIP DTX3L
0.0517501	37	3300	1.55482	GO:0070887 cellular response to chemical stimulus	http://amigo.geneontology.org/amigo/term/GO:0070887	TRAF5 TRAF2 TRAF3 CPNE8 LRRK2 CASP1 TBK1 NEDD4 TRPA1 UBE3A FOXP1 PLCG1 EGFR KAT5 GAS6 CASP8 NEO1 MCM2 KAT2A HELLS TBX2 PCNA PTPRA KCP CNOT9 WNT4 NLRP3 RYK ABCA1 STX8 PTEN GRB2 FAT4 ROBO2 RAC1 LRP1 FURIN
0.0527203	7	274	3.54273	GO:0006898 receptor-mediated endocytosis	http://amigo.geneontology.org/amigo/term/GO:0006898	NEDD4 AP4E1 AAK1 LRP1 EGFR GRB2 RAC1
0.0527203	9	425	2.9366	GO:0045786 negative regulation of cell cycle	http://amigo.geneontology.org/amigo/term/GO:0045786	TIPIN BTG1 MRNIP ATR SUSD2 KAT2A PTEN H2AX NSUN2
0.0527203	4	88	6.30331	GO:0048041 focal adhesion assembly	http://amigo.geneontology.org/amigo/term/GO:0048041	RAC1 PTPRA WNT4 PTEN
0.0527203	4	88	6.30331	GO:0070301 cellular response to hydrogen peroxide	http://amigo.geneontology.org/amigo/term/GO:0070301	TRPA1 FOXP1 PCNA LRRK2
0.0527203	2	13	21.3343	GO:0097105 presynaptic membrane assembly	http://amigo.geneontology.org/amigo/term/GO:0097105	LRP4 PTEN
0.0528424	8	348	3.18788	GO:0006310 DNA recombination	http://amigo.geneontology.org/amigo/term/GO:0006310	MCM2 HFM1 SLF1 KAT5 PIF1 SANBR H2AX MRNIP
0.0530039	6	206	4.03901	GO:0070302 regulation of stress-activated protein kinase signaling cascade	http://amigo.geneontology.org/amigo/term/GO:0070302	TRAF4 TRAF5 TRAF2 TRAF3 NBR1 EGFR
0.0539027	4	89	6.23248	GO:0001892 embryonic placenta development	http://amigo.geneontology.org/amigo/term/GO:0001892	EGFR GRB2 HEY1 CASP8
0.0551406	6	208	4.00017	GO:1902806 regulation of cell cycle G1/S phase transition	http://amigo.geneontology.org/amigo/term/GO:1902806	SUSD2 PTEN TBX2 ECD CUL4B EGFR
0.0559418	15	961	2.16451	GO:0010562 positive regulation of phosphorus metabolic process	http://amigo.geneontology.org/amigo/term/GO:0010562	MUSK ERBB3 EGFR RYK LRRK2 TRAF4 TRAF2 GAS6 CDON LRP4 PTBP1 RAC1 CNOT9 MRNIP TBK1
0.0559418	15	961	2.16451	GO:0045937 positive regulation of phosphate metabolic process	http://amigo.geneontology.org/amigo/term/GO:0045937	MUSK ERBB3 EGFR RYK LRRK2 TRAF4 TRAF2 GAS6 CDON LRP4 PTBP1 RAC1 CNOT9 MRNIP TBK1
0.0561858	5	146	4.74907	GO:0048813 dendrite morphogenesis	http://amigo.geneontology.org/amigo/term/GO:0048813	NEDD4 LRRK2 UBE3A LRP4 PTEN
0.0563846	7	279	3.47924	GO:0043122 regulation of I-kappaB kinase/NF-kappaB signaling	http://amigo.geneontology.org/amigo/term/GO:0043122	TRAF4 TRAF5 TRAF2 TRAF3 CASP8 CASP1 TBK1
0.0570751	4	91	6.0955	GO:0106027 neuron projection organization	http://amigo.geneontology.org/amigo/term/GO:0106027	LRRK2 UBE3A PTEN DCTN1
0.0572013	5	147	4.71676	GO:0034614 cellular response to reactive oxygen species	http://amigo.geneontology.org/amigo/term/GO:0034614	TRPA1 FOXP1 PCNA EGFR LRRK2
0.0576835	4	92	6.02925	GO:0034644 cellular response to UV	http://amigo.geneontology.org/amigo/term/GO:0034644	CUL4B PCNA NEDD4 ATR
0.0576835	6	212	3.9247	GO:0042594 response to starvation	http://amigo.geneontology.org/amigo/term/GO:0042594	NPRL2 XPR1 KAT5 WNT4 GAS6 LRRK2
0.0576835	3	46	9.04387	GO:0045663 positive regulation of myoblast differentiation	http://amigo.geneontology.org/amigo/term/GO:0045663	BTG1 KAT5 CDON
0.0576835	3	46	9.04387	GO:0061001 regulation of dendritic spine morphogenesis	http://amigo.geneontology.org/amigo/term/GO:0061001	LRRK2 UBE3A PTEN
0.0576835	2	14	19.8104	GO:0097090 presynaptic membrane organization	http://amigo.geneontology.org/amigo/term/GO:0097090	LRP4 PTEN
0.0576835	2	14	19.8104	GO:0097398 cellular response to interleukin-17	http://amigo.geneontology.org/amigo/term/GO:0097398	TRAF5 TRAF2
0.0576835	4	92	6.02925	GO:2000781 positive regulation of double-strand break repair	http://amigo.geneontology.org/amigo/term/GO:2000781	SLF1 KAT5 MRNIP DTX3L
0.0582306	5	149	4.65345	GO:0010212 response to ionizing radiation	http://amigo.geneontology.org/amigo/term/GO:0010212	KAT5 ATR H2AX MRNIP GRB2
0.0582306	6	213	3.90627	GO:0031334 positive regulation of protein-containing complex assembly	http://amigo.geneontology.org/amigo/term/GO:0031334	DCTN1 ABCA1 GRB2 SLF1 RAC1 ATR
0.0582306	5	149	4.65345	GO:0033135 regulation of peptidyl-serine phosphorylation	http://amigo.geneontology.org/amigo/term/GO:0033135	GAS6 CNOT9 EGFR PTEN TBK1
0.0582306	14	876	2.21623	GO:0042327 positive regulation of phosphorylation	http://amigo.geneontology.org/amigo/term/GO:0042327	MUSK ERBB3 EGFR RYK LRRK2 TRAF4 TRAF2 GAS6 CDON LRP4 RAC1 CNOT9 MRNIP TBK1
0.058871	4	93	5.96442	GO:0001656 metanephros development	http://amigo.geneontology.org/amigo/term/GO:0001656	FRAS1 WNT4 FAT4 ROBO2
0.0591004	6	214	3.88802	GO:0042770 signal transduction in response to DNA damage	http://amigo.geneontology.org/amigo/term/GO:0042770	MRNIP ATR KAT5 H2AX TIPIN GRB2
0.0593917	22	1680	1.81595	GO:0015031 protein transport	http://amigo.geneontology.org/amigo/term/GO:0015031	NSF STX8 AP4E1 LRRK2 GAS6 IFT27 COG4 GOSR2 TRIM3 VAMP7 RAB2B SNX14 FRAS1 DTX3L SENP2 ABCA1 BBS1 DMBT1 COG8 NEDD4 LRP1 FUT10
0.0593917	3	47	8.85145	GO:0060711 labyrinthine layer development	http://amigo.geneontology.org/amigo/term/GO:0060711	GRB2 HEY1 CASP8
0.0593917	7	285	3.406	GO:1901988 negative regulation of cell cycle phase transition	http://amigo.geneontology.org/amigo/term/GO:1901988	TIPIN MRNIP ATR SUSD2 PTEN H2AX NSUN2
0.0600367	13	789	2.28485	GO:0032989 cellular component morphogenesis	http://amigo.geneontology.org/amigo/term/GO:0032989	NEO1 NEDD4 RAC1 RYK ROBO2 LRRK2 PTPRM PTPRS UBE3A LRP4 PTEN RAPH1 UBB
0.0600367	4	94	5.90097	GO:0099175 regulation of postsynapse organization	http://amigo.geneontology.org/amigo/term/GO:0099175	LRRK2 PTPRS UBE3A PTEN
0.0610921	13	791	2.27907	GO:0001934 positive regulation of protein phosphorylation	http://amigo.geneontology.org/amigo/term/GO:0001934	LRRK2 TRAF4 TRAF2 EGFR GAS6 CDON LRP4 MUSK ERBB3 RAC1 CNOT9 MRNIP TBK1
0.0613926	5	152	4.5616	GO:0046328 regulation of JNK cascade	http://amigo.geneontology.org/amigo/term/GO:0046328	TRAF4 TRAF5 TRAF2 TRAF3 EGFR
0.0614847	5	153	4.53179	GO:0006275 regulation of DNA replication	http://amigo.geneontology.org/amigo/term/GO:0006275	TIPIN MCM2 EGFR PCNA ATR
0.0614847	9	444	2.81093	GO:0010975 regulation of neuron projection development	http://amigo.geneontology.org/amigo/term/GO:0010975	NEDD4 LRRK2 ROBO2 PTPRS UBE3A LRP4 RYK PTEN LRIG2
0.0614847	5	153	4.53179	GO:0014065 phosphatidylinositol 3-kinase signaling	http://amigo.geneontology.org/amigo/term/GO:0014065	PTEN ERBB3 UBE3A NEDD4 EGFR
0.0614847	2	15	18.4897	GO:0022038 corpus callosum development	http://amigo.geneontology.org/amigo/term/GO:0022038	PTPRS RYK
0.0614847	37	3365	1.52478	GO:0022607 cellular component assembly	http://amigo.geneontology.org/amigo/term/GO:0022607	SDK2 ASAP3 COG4 HELLS KANK4 RAC1 MIEN1 SDK1 TEKT1 BBS1 LRRK2 ATG9A IFT27 GLRX5 TRPA1 KAT2A DCTN1 MCM2 PTPRS TRAF2 PTPRA LRP4 WNT4 NLRP3 ABCA1 PTEN GRB2 GAS6 SLF1 SACS NEMF ATR MUSK ROBO2 RYK H2AX MATN1
0.0614847	12	702	2.37047	GO:0040008 regulation of growth	http://amigo.geneontology.org/amigo/term/GO:0040008	EGFR EI24 TLL2 PTPRS FOXP1 TBX2 RYK PTEN KAT5 GAS6 MUSK BTG1
0.0614847	2	15	18.4897	GO:0097396 response to interleukin-17	http://amigo.geneontology.org/amigo/term/GO:0097396	TRAF5 TRAF2
0.0614847	8	364	3.04775	GO:1901214 regulation of neuron death	http://amigo.geneontology.org/amigo/term/GO:1901214	UBB CASP8 ERBB3 LRRK2 TRIM2 TBK1 GRM4 TRAF2
0.0616134	20	1483	1.87016	GO:2000026 regulation of multicellular organismal development	http://amigo.geneontology.org/amigo/term/GO:2000026	HEY1 FOXP1 PLCG1 WNT4 KAT5 GAS6 ROBO2 PTPRS KAT2A TBX2 LRP4 MATN1 NLRP3 RYK PTEN NBR1 FAT4 CASP8 BTG1 PTPRM
0.0619898	4	96	5.77803	GO:0050848 regulation of calcium-mediated signaling	http://amigo.geneontology.org/amigo/term/GO:0050848	ITPR1 ERBB3 PTBP1 LRRK2
0.0623156	5	154	4.50236	GO:0032612 interleukin-1 production	http://amigo.geneontology.org/amigo/term/GO:0032612	CASP1 FOXP1 GAS6 NLRP3 CASP8
0.0623156	5	154	4.50236	GO:0032652 regulation of interleukin-1 production	http://amigo.geneontology.org/amigo/term/GO:0032652	CASP1 FOXP1 GAS6 NLRP3 CASP8
0.0624989	34	3024	1.55915	GO:0051239 regulation of multicellular organismal process	http://amigo.geneontology.org/amigo/term/GO:0051239	PLCG1 HEY1 CASP1 FOXP1 RAC1 FURIN WNT4 KAT5 GAS6 TBK1 ROBO2 ERBB3 PTPRS KAT2A TBX2 RAB2B TRAF3 LRP4 MATN1 NLRP3 RYK ABCA1 PTEN NBR1 LRRK2 FAT4 ANXA4 CASP8 VAMP7 TRAF2 BTG1 EGFR PTPRM LRP1
0.0634669	4	97	5.71846	GO:1903035 negative regulation of response to wounding	http://amigo.geneontology.org/amigo/term/GO:1903035	PTPRS WNT4 PTEN LRIG2
0.0634966	27	2239	1.67225	GO:0048468 cell development	http://amigo.geneontology.org/amigo/term/GO:0048468	USH2A NEO1 NEDD4 RAC1 RYK HEY1 ROBO2 LRRK2 FOXP1 PTPRM NSUN2 IFT27 PTPRS UBE3A LRP4 SDK1 CUL4B MATN1 WNT4 UBB PTEN KAT5 RAPH1 BBS1 FAT4 LRIG2 LRP1
0.0637627	34	3030	1.55606	GO:0006793 phosphorus metabolic process	http://amigo.geneontology.org/amigo/term/GO:0006793	MUSK ERBB3 PTPRS AAK1 PIGT DCTD PTPRA EGFR PRPS1 DGKI RYK PTEN PTPRM ATR TBK1 LRRK2 TRAF4 NPRL2 TRAF2 NAAA EXTL2 GAS6 CDON PLCG1 PLD2 MGAT1 LRP4 NEK8 PTBP1 RAC1 CNOT9 MRNIP SMG5 LRP1
0.0637627	30	2575	1.6156	GO:0032268 regulation of cellular protein metabolic process	http://amigo.geneontology.org/amigo/term/GO:0032268	CASP8 DPH1 UBE3A DPH2 CNOT9 LRP1 FURIN LRRK2 TRAF4 TRAF2 EGFR SENP2 UBB PTEN KAT5 GAS6 POMT2 CDON KAT2A LRP4 CASP1 NLRP3 LRIG2 PTBP1 MUSK ERBB3 RAC1 MRNIP DTX3L TBK1
0.063993	7	293	3.313	GO:0098742 cell-cell adhesion via plasma-membrane adhesion molecules	http://amigo.geneontology.org/amigo/term/GO:0098742	SDK2 PTPRS HMCN1 SDK1 PTPRM ROBO2 FAT4
0.0646143	4	98	5.66011	GO:0007044 cell-substrate junction assembly	http://amigo.geneontology.org/amigo/term/GO:0007044	RAC1 PTPRA WNT4 PTEN
0.0646143	9	451	2.7673	GO:0048608 reproductive structure development	http://amigo.geneontology.org/amigo/term/GO:0048608	UBE3A EGFR WNT4 UBB PTEN GRB2 ROBO2 HEY1 CASP8
0.0653223	9	452	2.76118	GO:0007409 axonogenesis	http://amigo.geneontology.org/amigo/term/GO:0007409	NEO1 RAC1 RYK ROBO2 PTPRM PTPRS LRP4 PTEN RAPH1
0.0664685	14	902	2.15235	GO:0035239 tube morphogenesis	http://amigo.geneontology.org/amigo/term/GO:0035239	PLCG1 KAT2A TBX2 LIAS EGFR WNT4 PTEN FAT4 HEY1 FOXP1 BTG1 PTPRM CASP8 LRP1
0.0664685	2	16	17.3341	GO:0035641 locomotory exploration behavior	http://amigo.geneontology.org/amigo/term/GO:0035641	UBE3A LRRK2
0.0664685	5	158	4.38838	GO:0050770 regulation of axonogenesis	http://amigo.geneontology.org/amigo/term/GO:0050770	ROBO2 PTPRS LRP4 RYK PTEN
0.0664685	5	158	4.38838	GO:0051961 negative regulation of nervous system development	http://amigo.geneontology.org/amigo/term/GO:0051961	PTPRS LRP4 RYK PTEN ROBO2
0.0664685	4	99	5.60294	GO:0060840 artery development	http://amigo.geneontology.org/amigo/term/GO:0060840	TBX2 LRP1 HEY1 ROBO2
0.0668503	9	455	2.74298	GO:0061458 reproductive system development	http://amigo.geneontology.org/amigo/term/GO:0061458	UBE3A EGFR WNT4 UBB PTEN GRB2 ROBO2 HEY1 CASP8
0.0669886	6	225	3.69794	GO:0048738 cardiac muscle tissue development	http://amigo.geneontology.org/amigo/term/GO:0048738	ERBB3 KAT2A FOXP1 TBX2 PTEN HEY1
0.0670585	3	51	8.15722	GO:0090102 cochlea development	http://amigo.geneontology.org/amigo/term/GO:0090102	IFT27 TBX2 MCM2
0.0671667	4	100	5.54691	GO:0015918 sterol transport	http://amigo.geneontology.org/amigo/term/GO:0015918	STAR FURIN ABCA1 LRP1
0.0688181	5	160	4.33352	GO:0035265 organ growth	http://amigo.geneontology.org/amigo/term/GO:0035265	UBE3A FOXP1 TBX2 MATN1 PTEN
0.0701428	3	52	8.00035	GO:0031103 axon regeneration	http://amigo.geneontology.org/amigo/term/GO:0031103	PTPRS PTEN LRIG2
0.070247	6	228	3.64928	GO:0031396 regulation of protein ubiquitination	http://amigo.geneontology.org/amigo/term/GO:0031396	UBE3A SENP2 UBB PTEN LRRK2 DTX3L
0.0705312	19	1409	1.86997	GO:0071495 cellular response to endogenous stimulus	http://amigo.geneontology.org/amigo/term/GO:0071495	LRRK2 NEDD4 UBE3A FOXP1 PLCG1 NEO1 KAT2A TBX2 PTPRA KCP EGFR WNT4 NLRP3 GRB2 FAT4 ROBO2 CNOT9 LRP1 FURIN
0.0708999	4	102	5.43815	GO:0060993 kidney morphogenesis	http://amigo.geneontology.org/amigo/term/GO:0060993	FRAS1 WNT4 LRRK2 FAT4
0.0721324	2	17	16.3144	GO:0034349 glial cell apoptotic process	http://amigo.geneontology.org/amigo/term/GO:0034349	GAS6 TRAF2
0.0721324	50	4987	1.39034	GO:0051234 establishment of localization	http://amigo.geneontology.org/amigo/term/GO:0051234	NEDD4 NSF AP4E1 ABCB1 COG4 GOSR2 AAK1 LRP1 VAMP7 RAC1 XPR1 STAR ABCA1 STX8 LRRK2 DCTN1 COG8 IFT27 ATR NSUN2 ERBB3 FURIN EGFR UBB KAT5 GAS6 USH2A TRPA1 TRIM3 UBE3A RAB2B LRP4 SNX14 FRAS1 ITPR1 DGKI DTX3L SENP2 NGB PTEN BBS1 DMBT1 ATG9A PLCG1 NEMF GRB2 FUT10 GRM4 PLD2 SMG5
0.072289	22	1729	1.76449	GO:0007155 cell adhesion	http://amigo.geneontology.org/amigo/term/GO:0007155	USH2A CDON NEO1 SDK2 PTPRS HMCN1 SDK1 ROBO2 FAT4 ERBB3 RAC1 KAT5 PTPRM PTPRA HMCN2 WNT4 NLRP3 SVEP1 PTEN GAS6 LMLN EGFR
0.0733828	6	231	3.60189	GO:0031669 cellular response to nutrient levels	http://amigo.geneontology.org/amigo/term/GO:0031669	NPRL2 XPR1 KAT5 GAS6 WNT4 LRRK2
0.0745171	4	104	5.33357	GO:0007173 epidermal growth factor receptor signaling pathway	http://amigo.geneontology.org/amigo/term/GO:0007173	EGFR GRB2 PLCG1 CNOT9
0.0745171	4	104	5.33357	GO:0150115 cell-substrate junction organization	http://amigo.geneontology.org/amigo/term/GO:0150115	RAC1 PTPRA WNT4 PTEN
0.0750084	13	825	2.18515	GO:1903047 mitotic cell cycle process	http://amigo.geneontology.org/amigo/term/GO:1903047	MCM2 MITD1 MRNIP DCTN1 ABCB1 PTEN KAT5 ECD PCNA CUL4B TIPIN SLF1 EGFR
0.075147	3	54	7.70404	GO:0045005 DNA-templated DNA replication maintenance of fidelity	http://amigo.geneontology.org/amigo/term/GO:0045005	TIPIN PCNA ATR
0.075147	3	54	7.70404	GO:0045332 phospholipid translocation	http://amigo.geneontology.org/amigo/term/GO:0045332	ABCB1 ABCA1 ATG9A
0.0756899	13	827	2.17986	GO:0000165 MAPK cascade	http://amigo.geneontology.org/amigo/term/GO:0000165	TRAF4 TRAF5 TRAF2 TRAF3 LRRK2 GRM4 EGFR RYK GAS6 CDON PTEN GRB2 NBR1
0.0756899	4	105	5.28277	GO:0008585 female gonad development	http://amigo.geneontology.org/amigo/term/GO:0008585	UBE3A WNT4 UBB ROBO2
0.0756899	4	105	5.28277	GO:0046330 positive regulation of JNK cascade	http://amigo.geneontology.org/amigo/term/GO:0046330	TRAF4 TRAF5 TRAF2 TRAF3
0.0763698	11	644	2.36863	GO:0120035 regulation of plasma membrane bounded cell projection organization	http://amigo.geneontology.org/amigo/term/GO:0120035	NEDD4 MIEN1 LRRK2 RAC1 ROBO2 PTPRS UBE3A LRP4 RYK PTEN LRIG2
0.0768019	5	167	4.15188	GO:0000723 telomere maintenance	http://amigo.geneontology.org/amigo/term/GO:0000723	ATR SLF1 PIF1 PCNA SMG5
0.0768019	2	18	15.4081	GO:0003184 pulmonary valve morphogenesis	http://amigo.geneontology.org/amigo/term/GO:0003184	HEY1 ROBO2
0.0768019	2	18	15.4081	GO:0007250 activation of NF-kappaB-inducing kinase activity	http://amigo.geneontology.org/amigo/term/GO:0007250	TRAF4 TRAF2
0.0768019	2	18	15.4081	GO:0038128 ERBB2 signaling pathway	http://amigo.geneontology.org/amigo/term/GO:0038128	EGFR ERBB3
0.0768019	5	167	4.15188	GO:0048592 eye morphogenesis	http://amigo.geneontology.org/amigo/term/GO:0048592	SDK2 SDK1 CDON TBX2 PTPRM
0.0768019	3	55	7.56397	GO:0055021 regulation of cardiac muscle tissue growth	http://amigo.geneontology.org/amigo/term/GO:0055021	FOXP1 TBX2 PTEN
0.0784577	9	473	2.63859	GO:0016055 Wnt signaling pathway	http://amigo.geneontology.org/amigo/term/GO:0016055	LRP4 WNT4 LRRK2 PTEN RYK SENP2 EGFR LRP1 RAC1
0.0787433	4	107	5.18403	GO:0044344 cellular response to fibroblast growth factor stimulus	http://amigo.geneontology.org/amigo/term/GO:0044344	TBX2 WNT4 GRB2 FAT4
0.0792843	7	312	3.11125	GO:0006302 double-strand break repair	http://amigo.geneontology.org/amigo/term/GO:0006302	MCM2 SLF1 KAT5 ATR H2AX MRNIP DTX3L
0.0796324	3	56	7.4289	GO:0072132 mesenchyme morphogenesis	http://amigo.geneontology.org/amigo/term/GO:0072132	TBX2 HEY1 ROBO2
0.0796324	9	475	2.62748	GO:0198738 cell-cell signaling by wnt	http://amigo.geneontology.org/amigo/term/GO:0198738	LRP4 WNT4 LRRK2 PTEN RYK SENP2 EGFR LRP1 RAC1
0.0830092	4	109	5.08891	GO:0046545 development of primary female sexual characteristics	http://amigo.geneontology.org/amigo/term/GO:0046545	UBE3A WNT4 UBB ROBO2
0.0835501	12	748	2.2247	GO:0045596 negative regulation of cell differentiation	http://amigo.geneontology.org/amigo/term/GO:0045596	HEY1 PTBP1 PTPRS FOXP1 LRP4 WNT4 RYK PTEN NBR1 USH2A EGFR ABCA1
0.0835501	2	19	14.5971	GO:0097107 postsynaptic density assembly	http://amigo.geneontology.org/amigo/term/GO:0097107	PTPRS PTEN
0.0851407	6	242	3.43817	GO:0014706 striated muscle tissue development	http://amigo.geneontology.org/amigo/term/GO:0014706	ERBB3 KAT2A FOXP1 TBX2 PTEN HEY1
0.0854938	5	173	4.00788	GO:0001959 regulation of cytokine-mediated signaling pathway	http://amigo.geneontology.org/amigo/term/GO:0001959	GAS6 TRAF2 TBK1 CASP1 CASP8
0.0854938	7	318	3.05254	GO:0007249 I-kappaB kinase/NF-kappaB signaling	http://amigo.geneontology.org/amigo/term/GO:0007249	TRAF4 TRAF5 TRAF2 TRAF3 CASP8 CASP1 TBK1
0.0854938	21	1660	1.75429	GO:0009719 response to endogenous stimulus	http://amigo.geneontology.org/amigo/term/GO:0009719	LRRK2 NEDD4 UBE3A FOXP1 PLCG1 NEO1 KAT2A TBX2 PCNA PTPRA KCP EGFR WNT4 NLRP3 GRB2 FAT4 ROBO2 CNOT9 LRP1 ABCA1 FURIN
0.0854938	3	58	7.17273	GO:0032210 regulation of telomere maintenance via telomerase	http://amigo.geneontology.org/amigo/term/GO:0032210	PIF1 ATR SMG5
0.0854938	3	58	7.17273	GO:0090329 regulation of DNA-templated DNA replication	http://amigo.geneontology.org/amigo/term/GO:0090329	TIPIN MCM2 PCNA
0.0893581	3	59	7.05116	GO:0031102 neuron projection regeneration	http://amigo.geneontology.org/amigo/term/GO:0031102	PTPRS PTEN LRIG2
0.0896625	22	1777	1.71683	GO:0048585 negative regulation of response to stimulus	http://amigo.geneontology.org/amigo/term/GO:0048585	NPRL2 LRP4 ERBB3 FOXP1 ITPR1 HEY1 GAS6 ROBO2 PTPRS HELLS WNT4 RYK PTEN LRRK2 LRIG2 CASP8 CNOT9 NEDD4 LRP1 PLCG1 FURIN EGFR
0.0897136	2	20	13.8673	GO:0006448 regulation of translational elongation	http://amigo.geneontology.org/amigo/term/GO:0006448	DPH1 DPH2
0.0897136	2	20	13.8673	GO:1903265 positive regulation of tumor necrosis factor-mediated signaling pathway	http://amigo.geneontology.org/amigo/term/GO:1903265	TRAF2 CASP1
0.0899233	5	176	3.93957	GO:0000724 double-strand break repair via homologous recombination	http://amigo.geneontology.org/amigo/term/GO:0000724	MCM2 SLF1 KAT5 H2AX MRNIP
0.0899233	4	113	4.90877	GO:0032204 regulation of telomere maintenance	http://amigo.geneontology.org/amigo/term/GO:0032204	SLF1 PIF1 SMG5 ATR
0.0899233	4	113	4.90877	GO:0071103 DNA conformation change	http://amigo.geneontology.org/amigo/term/GO:0071103	MCM2 TOP3B PIF1 HFM1
0.0899233	4	113	4.90877	GO:0071774 response to fibroblast growth factor	http://amigo.geneontology.org/amigo/term/GO:0071774	TBX2 WNT4 GRB2 FAT4
0.0910691	7	324	2.99602	GO:0018105 peptidyl-serine phosphorylation	http://amigo.geneontology.org/amigo/term/GO:0018105	TBK1 ATR GAS6 LRRK2 CNOT9 EGFR PTEN
0.0910691	3	60	6.93364	GO:0034204 lipid translocation	http://amigo.geneontology.org/amigo/term/GO:0034204	ABCB1 ABCA1 ATG9A
0.0910691	3	60	6.93364	GO:0060997 dendritic spine morphogenesis	http://amigo.geneontology.org/amigo/term/GO:0060997	LRRK2 UBE3A PTEN
0.092536	14	956	2.03077	GO:0051338 regulation of transferase activity	http://amigo.geneontology.org/amigo/term/GO:0051338	MUSK ERBB3 EGFR RYK LRRK2 TRAF4 NPRL2 TRAF2 PIF1 DTX3L PTEN GAS6 PCNA MRNIP
0.0929933	10	580	2.39091	GO:1905114 cell surface receptor signaling pathway involved in cell-cell signaling	http://amigo.geneontology.org/amigo/term/GO:1905114	LRP4 WNT4 LRRK2 PTEN DGKI RYK SENP2 EGFR LRP1 RAC1
0.09353	5	179	3.87354	GO:0001764 neuron migration	http://amigo.geneontology.org/amigo/term/GO:0001764	NEO1 BBS1 GAS6 LRIG2 RAC1
0.09353	4	115	4.8234	GO:0021761 limbic system development	http://amigo.geneontology.org/amigo/term/GO:0021761	PTPRS UBB PTEN BBS1
0.09353	4	115	4.8234	GO:0045445 myoblast differentiation	http://amigo.geneontology.org/amigo/term/GO:0045445	BTG1 KAT5 CDON TBX2
0.09353	7	327	2.96853	GO:0048638 regulation of developmental growth	http://amigo.geneontology.org/amigo/term/GO:0048638	TLL2 PTPRS FOXP1 TBX2 RYK PTEN MUSK
0.09353	3	61	6.81997	GO:0051145 smooth muscle cell differentiation	http://amigo.geneontology.org/amigo/term/GO:0051145	HEY1 TBX2 WNT4
0.0948157	2	21	13.2069	GO:0002902 regulation of B cell apoptotic process	http://amigo.geneontology.org/amigo/term/GO:0002902	FOXP1 PTEN
0.0948495	5	180	3.85202	GO:0000725 recombinational repair	http://amigo.geneontology.org/amigo/term/GO:0000725	MCM2 SLF1 KAT5 H2AX MRNIP
0.0950304	4	116	4.78182	GO:0033138 positive regulation of peptidyl-serine phosphorylation	http://amigo.geneontology.org/amigo/term/GO:0033138	GAS6 CNOT9 EGFR TBK1
0.0950931	21	1687	1.72622	GO:0051240 positive regulation of multicellular organismal process	http://amigo.geneontology.org/amigo/term/GO:0051240	CASP1 PLCG1 FURIN WNT4 KAT5 GAS6 TBK1 ROBO2 ERBB3 KAT2A TBX2 RAB2B NLRP3 ABCA1 LRRK2 CASP8 VAMP7 TRAF2 BTG1 FOXP1 LRP1
0.096258	3	62	6.70997	GO:0043277 apoptotic cell clearance	http://amigo.geneontology.org/amigo/term/GO:0043277	RAC1 GAS6 LRP1
0.096258	3	62	6.70997	GO:0060420 regulation of heart growth	http://amigo.geneontology.org/amigo/term/GO:0060420	FOXP1 TBX2 PTEN
0.096898	19	1478	1.78267	GO:0019220 regulation of phosphate metabolic process	http://amigo.geneontology.org/amigo/term/GO:0019220	MUSK ERBB3 EGFR RYK LRRK2 TRAF4 NPRL2 TRAF2 PTEN GAS6 CDON LRP4 PTBP1 RAC1 CNOT9 MRNIP SMG5 LRP1 TBK1
0.096898	17	1269	1.85771	GO:0033043 regulation of organelle organization	http://amigo.geneontology.org/amigo/term/GO:0033043	ASAP3 KANK4 RAC1 LRRK2 SLF1 KAT2A PIF1 KAT5 DCTN1 MCM2 PTPRS WNT4 GRB2 SMG5 INF2 LRP1 ATR
0.0972849	19	1479	1.78146	GO:0051174 regulation of phosphorus metabolic process	http://amigo.geneontology.org/amigo/term/GO:0051174	MUSK ERBB3 EGFR RYK LRRK2 TRAF4 NPRL2 TRAF2 PTEN GAS6 CDON LRP4 PTBP1 RAC1 CNOT9 MRNIP SMG5 LRP1 TBK1
0.0982647	11	680	2.24324	GO:0043009 chordate embryonic development	http://amigo.geneontology.org/amigo/term/GO:0043009	NSUN2 KAT2A LIAS MGAT1 FURIN EGFR KAT5 GRB2 PLCG1 HEY1 CASP8
0.0983818	10	589	2.35438	GO:0006914 autophagy	http://amigo.geneontology.org/amigo/term/GO:0006914	NPRL2 SNX14 EI24 NBR1 LRRK2 ATG9A KAT5 TBK1 NEDD4 ITPR1
0.0983818	10	589	2.35438	GO:0061919 process utilizing autophagic mechanism	http://amigo.geneontology.org/amigo/term/GO:0061919	NPRL2 SNX14 EI24 NBR1 LRRK2 ATG9A KAT5 TBK1 NEDD4 ITPR1
0.098451	3	63	6.60346	GO:0006911 phagocytosis engulfment	http://amigo.geneontology.org/amigo/term/GO:0006911	RAC1 ABCA1 VAMP7
0.098451	9	501	2.49113	GO:0031331 positive regulation of cellular catabolic process	http://amigo.geneontology.org/amigo/term/GO:0031331	NPRL2 LRRK2 FURIN CNOT9 PTEN KAT5 TBK1 LRP1 DTX3L
0.098451	7	333	2.91504	GO:0048193 Golgi vesicle transport	http://amigo.geneontology.org/amigo/term/GO:0048193	NSF COG4 GOSR2 COG8 LRRK2 BBS1 VAMP7
0.098451	11	681	2.23994	GO:0061061 muscle structure development	http://amigo.geneontology.org/amigo/term/GO:0061061	PTBP1 BTG1 HEY1 KAT5 CDON ERBB3 TLL2 KAT2A FOXP1 TBX2 WNT4
0.0991359	2	22	12.6066	GO:0003177 pulmonary valve development	http://amigo.geneontology.org/amigo/term/GO:0003177	HEY1 ROBO2
0.0991359	2	22	12.6066	GO:0031290 retinal ganglion cell axon guidance	http://amigo.geneontology.org/amigo/term/GO:0031290	PTPRM ROBO2
0.0991359	2	22	12.6066	GO:0098698 postsynaptic specialization assembly	http://amigo.geneontology.org/amigo/term/GO:0098698	PTPRS PTEN
0.0998969	8	417	2.66039	GO:0060537 muscle tissue development	http://amigo.geneontology.org/amigo/term/GO:0060537	CDON ERBB3 TLL2 KAT2A FOXP1 TBX2 PTEN HEY1
0.100168	7	335	2.89764	GO:0016236 macroautophagy	http://amigo.geneontology.org/amigo/term/GO:0016236	SNX14 EI24 NBR1 LRRK2 ATG9A TBK1 NEDD4
0.100277	5	185	3.74791	GO:0060759 regulation of response to cytokine stimulus	http://amigo.geneontology.org/amigo/term/GO:0060759	GAS6 TRAF2 TBK1 CASP1 CASP8
0.100277	3	64	6.50028	GO:0061098 positive regulation of protein tyrosine kinase activity	http://amigo.geneontology.org/amigo/term/GO:0061098	GAS6 EGFR ERBB3
0.100277	3	64	6.50028	GO:1902808 positive regulation of cell cycle G1/S phase transition	http://amigo.geneontology.org/amigo/term/GO:1902808	TBX2 CUL4B EGFR
0.100375	4	120	4.62242	GO:0032479 regulation of type I interferon production	http://amigo.geneontology.org/amigo/term/GO:0032479	TBK1 RAB2B TRAF3 PTPRS
0.100375	4	120	4.62242	GO:0032606 type I interferon production	http://amigo.geneontology.org/amigo/term/GO:0032606	TBK1 RAB2B TRAF3 PTPRS
0.100375	17	1280	1.84175	GO:0043085 positive regulation of catalytic activity	http://amigo.geneontology.org/amigo/term/GO:0043085	MUSK CASP8 ERBB3 EGFR RYK LRRK2 TRAF4 ASAP3 TRAF2 PCNA DTX3L PTEN GAS6 CASP1 WNT4 NLRP3 MRNIP
0.103055	3	65	6.40028	GO:0032608 interferon-beta production	http://amigo.geneontology.org/amigo/term/GO:0032608	TBK1 TRAF3 PTPRS
0.103055	3	65	6.40028	GO:0032648 regulation of interferon-beta production	http://amigo.geneontology.org/amigo/term/GO:0032648	TBK1 TRAF3 PTPRS
0.103055	5	187	3.70783	GO:0048015 phosphatidylinositol-mediated signaling	http://amigo.geneontology.org/amigo/term/GO:0048015	PTEN ERBB3 UBE3A NEDD4 EGFR
0.103552	15	1081	1.92423	GO:0003006 developmental process involved in reproduction	http://amigo.geneontology.org/amigo/term/GO:0003006	NSUN2 IFT27 UBE3A EGFR WNT4 UBB PTEN KAT5 GRB2 H2AX LRRK2 ROBO2 HEY1 CASP8 CNOT9
0.103798	33	3073	1.48916	GO:0009605 response to external stimulus	http://amigo.geneontology.org/amigo/term/GO:0009605	NEO1 NPRL2 RAC1 CASP1 XPR1 ROBO2 DMBT1 TRAF3 TBK1 FOXP1 KAT5 PTPRM GAS6 CASP8 TRAF4 TRPA1 PTPRS KAT2A LIAS RAB2B HMCN1 WNT4 NLRP3 RYK DTX3L ABCA1 STX8 PTEN LRRK2 LRIG2 VAMP7 PLCG1 FURIN
0.104413	2	23	12.0585	GO:0023019 signal transduction involved in regulation of gene expression	http://amigo.geneontology.org/amigo/term/GO:0023019	TRAF5 TRAF2
0.105345	16	1189	1.86608	GO:0009790 embryo development	http://amigo.geneontology.org/amigo/term/GO:0009790	WNT4 NSUN2 CDON KAT2A TBX2 LIAS MGAT1 LRP4 FRAS1 FURIN EGFR KAT5 GRB2 PLCG1 HEY1 CASP8
0.105345	5	189	3.66859	GO:0031214 biomineral tissue development	http://amigo.geneontology.org/amigo/term/GO:0031214	WNT4 GAS6 MATN1 NBR1 HEY1
0.105345	6	263	3.16364	GO:0031668 cellular response to extracellular stimulus	http://amigo.geneontology.org/amigo/term/GO:0031668	NPRL2 XPR1 KAT5 GAS6 WNT4 LRRK2
0.105345	4	123	4.50968	GO:0032355 response to estradiol	http://amigo.geneontology.org/amigo/term/GO:0032355	EGFR KAT5 CASP8 PCNA
0.105345	15	1085	1.91713	GO:0040012 regulation of locomotion	http://amigo.geneontology.org/amigo/term/GO:0040012	PLCG1 RAC1 MIEN1 GAS6 ROBO2 WNT4 RYK BBS1 LRIG2 FOXP1 EGFR PTEN PTPRM LRRK2 LRP1
0.105345	29	2613	1.53904	GO:0051172 negative regulation of nitrogen compound metabolic process	http://amigo.geneontology.org/amigo/term/GO:0051172	TIPIN FOXP1 FOXP2 FOXP4 CNOT9 KAT5 MAF1 LRP1 LRRK2 PTBP1 TBX2 ZMYM2 PIF1 FURIN EGFR SENP2 HEY1 PTEN GAS6 NSUN2 TRAF5 TRAF2 PCNA WNT4 PCBP3 LRIG2 NEDD4 DTX3L ATR
0.105345	7	342	2.83833	GO:0051604 protein maturation	http://amigo.geneontology.org/amigo/term/GO:0051604	TLL2 FURIN LRRK2 CASP8 CASP1 LIAS GLRX5
0.105345	7	341	2.84665	GO:0051607 defense response to virus	http://amigo.geneontology.org/amigo/term/GO:0051607	TRAF3 CASP1 TBK1 RAB2B NLRP3 DTX3L DMBT1
0.105345	27	2388	1.56791	GO:0051649 establishment of localization in cell	http://amigo.geneontology.org/amigo/term/GO:0051649	VAMP7 STAR STX8 LRRK2 DCTN1 AP4E1 IFT27 NSUN2 NEDD4 ABCA1 UBB KAT5 GAS6 USH2A TRPA1 ITPR1 DGKI PTEN NSF PLCG1 DTX3L NEMF LRP1 FUT10 GRM4 PLD2 SMG5
0.105345	5	189	3.66859	GO:0061025 membrane fusion	http://amigo.geneontology.org/amigo/term/GO:0061025	GOSR2 VAMP7 STX8 GAS6 NSF
0.105345	7	342	2.83833	GO:0140546 defense response to symbiont	http://amigo.geneontology.org/amigo/term/GO:0140546	TRAF3 CASP1 TBK1 RAB2B NLRP3 DTX3L DMBT1
0.106909	4	124	4.47331	GO:0001952 regulation of cell-matrix adhesion	http://amigo.geneontology.org/amigo/term/GO:0001952	RAC1 PTPRA WNT4 PTEN
0.106909	4	124	4.47331	GO:0030518 intracellular steroid hormone receptor signaling pathway	http://amigo.geneontology.org/amigo/term/GO:0030518	NEDD4 UBE3A FOXP1 CNOT9
0.106909	3	67	6.20923	GO:0048016 inositol phosphate-mediated signaling	http://amigo.geneontology.org/amigo/term/GO:0048016	ERBB3 ITPR1 PTBP1
0.106909	3	67	6.20923	GO:0097035 regulation of membrane lipid distribution	http://amigo.geneontology.org/amigo/term/GO:0097035	ABCB1 ABCA1 ATG9A
0.106909	3	67	6.20923	GO:1904356 regulation of telomere maintenance via telomere lengthening	http://amigo.geneontology.org/amigo/term/GO:1904356	PIF1 ATR SMG5
0.107398	16	1194	1.85826	GO:0009628 response to abiotic stimulus	http://amigo.geneontology.org/amigo/term/GO:0009628	CASP1 CUL4B PCNA EGFR ITPR1 KAT5 ATR CASP8 TIPIN TRPA1 PTEN H2AX NEDD4 ABCB1 MRNIP GRB2
0.107898	2	24	11.5561	GO:0010640 regulation of platelet-derived growth factor receptor signaling pathway	http://amigo.geneontology.org/amigo/term/GO:0010640	LRIG2 LRP1
0.107898	2	24	11.5561	GO:0055022 negative regulation of cardiac muscle tissue growth	http://amigo.geneontology.org/amigo/term/GO:0055022	FOXP1 PTEN
0.107898	2	24	11.5561	GO:0061117 negative regulation of heart growth	http://amigo.geneontology.org/amigo/term/GO:0061117	FOXP1 PTEN
0.107898	2	24	11.5561	GO:0072170 metanephric tubule development	http://amigo.geneontology.org/amigo/term/GO:0072170	WNT4 FAT4
0.10923	11	702	2.17293	GO:0009792 embryo development ending in birth or egg hatching	http://amigo.geneontology.org/amigo/term/GO:0009792	NSUN2 KAT2A LIAS MGAT1 FURIN EGFR KAT5 GRB2 PLCG1 HEY1 CASP8
0.10923	3	68	6.11791	GO:0035567 non-canonical Wnt signaling pathway	http://amigo.geneontology.org/amigo/term/GO:0035567	WNT4 RYK RAC1
0.10923	3	68	6.11791	GO:0060113 inner ear receptor cell differentiation	http://amigo.geneontology.org/amigo/term/GO:0060113	USH2A IFT27 FAT4
0.109315	14	996	1.94922	GO:0000278 mitotic cell cycle	http://amigo.geneontology.org/amigo/term/GO:0000278	MCM2 BTG1 MITD1 MRNIP DCTN1 ABCB1 PTEN KAT5 ECD PCNA CUL4B TIPIN SLF1 EGFR
0.109315	7	347	2.79743	GO:0018209 peptidyl-serine modification	http://amigo.geneontology.org/amigo/term/GO:0018209	TBK1 ATR GAS6 LRRK2 CNOT9 EGFR PTEN
0.109315	4	126	4.40231	GO:0046660 female sex differentiation	http://amigo.geneontology.org/amigo/term/GO:0046660	UBE3A WNT4 UBB ROBO2
0.109315	25	2175	1.59394	GO:0071705 nitrogen compound transport	http://amigo.geneontology.org/amigo/term/GO:0071705	NSF ABCB1 STX8 AP4E1 LRRK2 NSUN2 GAS6 IFT27 COG4 GOSR2 TRIM3 VAMP7 RAB2B SNX14 FRAS1 DTX3L SENP2 ABCA1 BBS1 DMBT1 COG8 NEDD4 LRP1 FUT10 SMG5
0.110583	5	194	3.57404	GO:0031099 regeneration	http://amigo.geneontology.org/amigo/term/GO:0031099	PTPRS PCNA PTEN GAS6 LRIG2
0.112066	3	69	6.02925	GO:0070265 necrotic cell death	http://amigo.geneontology.org/amigo/term/GO:0070265	CASP8 TRAF2 ATG9A
0.113005	6	270	3.08162	GO:1903320 regulation of protein modification by small protein conjugation or removal	http://amigo.geneontology.org/amigo/term/GO:1903320	UBE3A SENP2 UBB PTEN LRRK2 DTX3L
0.11309	2	25	11.0938	GO:0003148 outflow tract septum morphogenesis	http://amigo.geneontology.org/amigo/term/GO:0003148	TBX2 ROBO2
0.11309	10	614	2.25851	GO:0007423 sensory organ development	http://amigo.geneontology.org/amigo/term/GO:0007423	SDK2 SDK1 USH2A CDON IFT27 TBX2 EGFR FAT4 MCM2 PTPRM
0.11309	2	25	11.0938	GO:0072202 cell differentiation involved in metanephros development	http://amigo.geneontology.org/amigo/term/GO:0072202	FAT4 WNT4
0.11309	2	25	11.0938	GO:1903205 regulation of hydrogen peroxide-induced cell death	http://amigo.geneontology.org/amigo/term/GO:1903205	FOXP1 LRRK2
0.113358	5	196	3.53757	GO:0110148 biomineralization	http://amigo.geneontology.org/amigo/term/GO:0110148	WNT4 GAS6 MATN1 NBR1 HEY1
0.114898	20	1635	1.6963	GO:0022414 reproductive process	http://amigo.geneontology.org/amigo/term/GO:0022414	HFM1 NSUN2 IFT27 UBE3A PCNA EGFR WNT4 TEKT1 UBB PTEN KAT5 BBS1 GRB2 H2AX LRRK2 ROBO2 HEY1 FUT10 CASP8 CNOT9
0.114998	6	272	3.05896	GO:0006909 phagocytosis	http://amigo.geneontology.org/amigo/term/GO:0006909	LRP1 RAC1 GAS6 ABCA1 VAMP7 PLD2
0.115275	10	620	2.23666	GO:0001819 positive regulation of cytokine production	http://amigo.geneontology.org/amigo/term/GO:0001819	CASP1 FURIN TBK1 KAT2A RAB2B NLRP3 LRRK2 CASP8 TRAF2 FOXP1
0.115275	32	3005	1.47671	GO:0006796 phosphate-containing compound metabolic process	http://amigo.geneontology.org/amigo/term/GO:0006796	MUSK ERBB3 PTPRS AAK1 PIGT DCTD PTPRA EGFR PRPS1 DGKI RYK PTEN PTPRM ATR TBK1 LRRK2 TRAF4 NPRL2 TRAF2 NAAA GAS6 CDON PLCG1 PLD2 LRP4 NEK8 PTBP1 RAC1 CNOT9 MRNIP SMG5 LRP1
0.115275	47	4823	1.35136	GO:0006810 transport	http://amigo.geneontology.org/amigo/term/GO:0006810	NEDD4 NSF AP4E1 ABCB1 COG4 GOSR2 AAK1 LRP1 VAMP7 RAC1 XPR1 STAR ABCA1 STX8 LRRK2 DCTN1 COG8 IFT27 NSUN2 ERBB3 FURIN EGFR UBB GAS6 TRPA1 TRIM3 UBE3A RAB2B LRP4 SNX14 FRAS1 ITPR1 DGKI DTX3L SENP2 NGB PTEN BBS1 DMBT1 ATG9A PLCG1 NEMF GRB2 FUT10 GRM4 PLD2 SMG5
0.115275	3	71	5.85941	GO:0008333 endosome to lysosome transport	http://amigo.geneontology.org/amigo/term/GO:0008333	VAMP7 STX8 DTX3L
0.115275	10	620	2.23666	GO:0010256 endomembrane system organization	http://amigo.geneontology.org/amigo/term/GO:0010256	COG4 LRRK2 RAB2B PTEN FAT4 ATG9A ABCA1 DCTN1 COG8 NSF
0.115275	9	528	2.36374	GO:0033674 positive regulation of kinase activity	http://amigo.geneontology.org/amigo/term/GO:0033674	MUSK ERBB3 EGFR RYK LRRK2 TRAF4 TRAF2 GAS6 MRNIP
0.115275	17	1318	1.78865	GO:0042325 regulation of phosphorylation	http://amigo.geneontology.org/amigo/term/GO:0042325	MUSK ERBB3 EGFR RYK LRRK2 TRAF4 NPRL2 TRAF2 PTEN GAS6 CDON LRP4 RAC1 CNOT9 MRNIP LRP1 TBK1
0.115275	8	438	2.53284	GO:0043254 regulation of protein-containing complex assembly	http://amigo.geneontology.org/amigo/term/GO:0043254	KANK4 DCTN1 ABCA1 GRB2 TRAF2 SLF1 RAC1 ATR
0.115275	3	71	5.85941	GO:0043489 RNA stabilization	http://amigo.geneontology.org/amigo/term/GO:0043489	NSUN2 TRAF5 TRAF2
0.115275	3	71	5.85941	GO:0048844 artery morphogenesis	http://amigo.geneontology.org/amigo/term/GO:0048844	TBX2 LRP1 HEY1
0.115275	3	71	5.85941	GO:0060411 cardiac septum morphogenesis	http://amigo.geneontology.org/amigo/term/GO:0060411	TBX2 HEY1 ROBO2
0.115275	6	274	3.03663	GO:0090068 positive regulation of cell cycle process	http://amigo.geneontology.org/amigo/term/GO:0090068	KAT5 TBX2 CUL4B WNT4 SLF1 EGFR
0.115275	4	130	4.26685	GO:0090398 cellular senescence	http://amigo.geneontology.org/amigo/term/GO:0090398	TBX2 PTEN H2AX KAT5
0.115275	4	130	4.26685	GO:2000278 regulation of DNA biosynthetic process	http://amigo.geneontology.org/amigo/term/GO:2000278	PIF1 PCNA ATR SMG5
0.115509	20	1644	1.68702	GO:0000003 reproduction	http://amigo.geneontology.org/amigo/term/GO:0000003	HFM1 NSUN2 IFT27 UBE3A PCNA EGFR WNT4 TEKT1 UBB PTEN KAT5 BBS1 GRB2 H2AX LRRK2 ROBO2 HEY1 FUT10 CASP8 CNOT9
0.115509	2	26	10.6671	GO:0001783 B cell apoptotic process	http://amigo.geneontology.org/amigo/term/GO:0001783	FOXP1 PTEN
0.115509	5	199	3.48424	GO:0030308 negative regulation of cell growth	http://amigo.geneontology.org/amigo/term/GO:0030308	EI24 PTPRS FOXP1 RYK BTG1
0.115509	5	199	3.48424	GO:0032200 telomere organization	http://amigo.geneontology.org/amigo/term/GO:0032200	ATR SLF1 PIF1 PCNA SMG5
0.115509	6	275	3.02559	GO:0044843 cell cycle G1/S phase transition	http://amigo.geneontology.org/amigo/term/GO:0044843	SUSD2 PTEN TBX2 ECD CUL4B EGFR
0.115509	2	26	10.6671	GO:0051894 positive regulation of focal adhesion assembly	http://amigo.geneontology.org/amigo/term/GO:0051894	RAC1 WNT4
0.115509	6	275	3.02559	GO:1903362 regulation of cellular protein catabolic process	http://amigo.geneontology.org/amigo/term/GO:1903362	UBE3A FURIN UBB PTEN LRRK2 LRP1
0.115509	2	26	10.6671	GO:2000773 negative regulation of cellular senescence	http://amigo.geneontology.org/amigo/term/GO:2000773	TBX2 PTEN
0.11576	4	131	4.23428	GO:0071482 cellular response to light stimulus	http://amigo.geneontology.org/amigo/term/GO:0071482	CUL4B PCNA NEDD4 ATR
0.1169	3	72	5.77803	GO:0055017 cardiac muscle tissue growth	http://amigo.geneontology.org/amigo/term/GO:0055017	FOXP1 TBX2 PTEN
0.1169	3	72	5.77803	GO:0099024 plasma membrane invagination	http://amigo.geneontology.org/amigo/term/GO:0099024	RAC1 ABCA1 VAMP7
0.117979	4	132	4.2022	GO:0030278 regulation of ossification	http://amigo.geneontology.org/amigo/term/GO:0030278	WNT4 MATN1 NBR1 LRP4
0.12002	3	73	5.69888	GO:0007004 telomere maintenance via telomerase	http://amigo.geneontology.org/amigo/term/GO:0007004	PIF1 ATR SMG5
0.12002	3	73	5.69888	GO:0022029 telencephalon cell migration	http://amigo.geneontology.org/amigo/term/GO:0022029	EGFR FUT10 LRRK2
0.12002	3	73	5.69888	GO:0070059 intrinsic apoptotic signaling pathway in response to endoplasmic reticulum stress	http://amigo.geneontology.org/amigo/term/GO:0070059	ITPR1 LRRK2 TRAF2
0.12002	3	73	5.69888	GO:1905330 regulation of morphogenesis of an epithelium	http://amigo.geneontology.org/amigo/term/GO:1905330	TBX2 WNT4 FOXP1
0.121099	2	27	10.2721	GO:0000466 maturation of 5.8S rRNA from tricistronic rRNA transcript (SSU-rRNA 5.8S rRNA LSU-rRNA)	http://amigo.geneontology.org/amigo/term/GO:0000466	WDR12 UTP20
0.121099	2	27	10.2721	GO:0002726 positive regulation of T cell cytokine production	http://amigo.geneontology.org/amigo/term/GO:0002726	NLRP3 TRAF2
0.121099	2	27	10.2721	GO:0010893 positive regulation of steroid biosynthetic process	http://amigo.geneontology.org/amigo/term/GO:0010893	STAR WNT4
0.121099	2	27	10.2721	GO:1905207 regulation of cardiocyte differentiation	http://amigo.geneontology.org/amigo/term/GO:1905207	KAT2A EGFR
0.123064	3	74	5.62187	GO:0006278 RNA-templated DNA biosynthetic process	http://amigo.geneontology.org/amigo/term/GO:0006278	PIF1 ATR SMG5
0.123064	7	363	2.67413	GO:0009895 negative regulation of catabolic process	http://amigo.geneontology.org/amigo/term/GO:0009895	LRRK2 FURIN EGFR NSUN2 TRAF5 TRAF2 LRIG2
0.123064	6	281	2.96098	GO:0033044 regulation of chromosome organization	http://amigo.geneontology.org/amigo/term/GO:0033044	SLF1 PIF1 KAT5 MCM2 SMG5 ATR
0.123355	8	450	2.46529	GO:0009615 response to virus	http://amigo.geneontology.org/amigo/term/GO:0009615	TRAF3 CASP1 TBK1 RAB2B XPR1 NLRP3 DTX3L DMBT1
0.123355	23	1994	1.59953	GO:0016310 phosphorylation	http://amigo.geneontology.org/amigo/term/GO:0016310	MUSK ERBB3 AAK1 EGFR DGKI RYK ATR TBK1 LRRK2 TRAF4 NPRL2 TRAF2 PTEN GAS6 CDON PTPRA LRP4 PRPS1 NEK8 RAC1 CNOT9 MRNIP LRP1
0.123355	4	135	4.10882	GO:0032611 interleukin-1 beta production	http://amigo.geneontology.org/amigo/term/GO:0032611	CASP1 FOXP1 NLRP3 CASP8
0.123355	4	135	4.10882	GO:0032651 regulation of interleukin-1 beta production	http://amigo.geneontology.org/amigo/term/GO:0032651	CASP1 FOXP1 NLRP3 CASP8
0.124592	15	1130	1.84079	GO:0051241 negative regulation of multicellular organismal process	http://amigo.geneontology.org/amigo/term/GO:0051241	RAC1 KAT5 GAS6 PTPRS FOXP1 LRP4 RYK PTEN ANXA4 FURIN EGFR WNT4 PTPRM HEY1 ROBO2
0.12554	2	28	9.90519	GO:0002862 negative regulation of inflammatory response to antigenic stimulus	http://amigo.geneontology.org/amigo/term/GO:0002862	PLCG1 FURIN
0.12554	2	28	9.90519	GO:0003272 endocardial cushion formation	http://amigo.geneontology.org/amigo/term/GO:0003272	TBX2 ROBO2
0.12554	2	28	9.90519	GO:0010875 positive regulation of cholesterol efflux	http://amigo.geneontology.org/amigo/term/GO:0010875	ABCA1 LRP1
0.12554	6	284	2.92971	GO:0031330 negative regulation of cellular catabolic process	http://amigo.geneontology.org/amigo/term/GO:0031330	LRRK2 FURIN NSUN2 TRAF5 TRAF2 LRIG2
0.12554	11	731	2.08673	GO:0031347 regulation of defense response	http://amigo.geneontology.org/amigo/term/GO:0031347	CASP1 FOXP1 TRAF3 NLRP3 TBK1 LRRK2 DTX3L VAMP7 CASP8 PLCG1 FURIN
0.12554	5	207	3.34958	GO:0043123 positive regulation of I-kappaB kinase/NF-kappaB signaling	http://amigo.geneontology.org/amigo/term/GO:0043123	TRAF2 TRAF5 CASP8 CASP1 TBK1
0.12554	16	1237	1.79367	GO:0048646 anatomical structure formation involved in morphogenesis	http://amigo.geneontology.org/amigo/term/GO:0048646	SDK2 SDK1 PLCG1 CDON KAT2A TBX2 LIAS FURIN WNT4 PTEN GRB2 HEY1 BTG1 PTPRM CASP8 ROBO2
0.12554	2	28	9.90519	GO:0070269 pyroptosis	http://amigo.geneontology.org/amigo/term/GO:0070269	CASP1 CASP8
0.12554	2	28	9.90519	GO:0072207 metanephric epithelium development	http://amigo.geneontology.org/amigo/term/GO:0072207	WNT4 FAT4
0.126537	4	137	4.04884	GO:0032874 positive regulation of stress-activated MAPK cascade	http://amigo.geneontology.org/amigo/term/GO:0032874	TRAF4 TRAF5 TRAF2 TRAF3
0.126706	12	831	2.00249	GO:0030162 regulation of proteolysis	http://amigo.geneontology.org/amigo/term/GO:0030162	CASP8 UBE3A LRP1 FURIN LRRK2 UBB PTEN GAS6 TRAF3 CASP1 NLRP3 LRIG2
0.126974	3	76	5.47392	GO:0021885 forebrain cell migration	http://amigo.geneontology.org/amigo/term/GO:0021885	EGFR FUT10 LRRK2
0.126974	5	208	3.33348	GO:0043393 regulation of protein binding	http://amigo.geneontology.org/amigo/term/GO:0043393	LRRK2 CDON LRP1 MITD1 DTX3L
0.12833	7	369	2.63065	GO:0040013 negative regulation of locomotion	http://amigo.geneontology.org/amigo/term/GO:0040013	RAC1 ROBO2 WNT4 RYK PTEN PTPRM LRP1
0.12833	20	1674	1.65678	GO:0045934 negative regulation of nucleobase-containing compound metabolic process	http://amigo.geneontology.org/amigo/term/GO:0045934	TIPIN FOXP1 FOXP2 FOXP4 KAT5 MAF1 PTBP1 TBX2 ZMYM2 PIF1 HEY1 GAS6 NSUN2 TRAF5 TRAF2 PCNA WNT4 PCBP3 NEDD4 ATR
0.129702	17	1354	1.74109	GO:0009968 negative regulation of signal transduction	http://amigo.geneontology.org/amigo/term/GO:0009968	NPRL2 LRP4 ERBB3 FOXP1 ITPR1 HEY1 GAS6 HELLS WNT4 PTEN LRRK2 CASP8 PTPRS CNOT9 NEDD4 LRP1 EGFR
0.129702	2	29	9.56364	GO:0032367 intracellular cholesterol transport	http://amigo.geneontology.org/amigo/term/GO:0032367	STAR ABCA1
0.129702	2	29	9.56364	GO:0035640 exploration behavior	http://amigo.geneontology.org/amigo/term/GO:0035640	UBE3A LRRK2
0.129702	2	29	9.56364	GO:0036474 cell death in response to hydrogen peroxide	http://amigo.geneontology.org/amigo/term/GO:0036474	FOXP1 LRRK2
0.129702	5	210	3.30173	GO:0048839 inner ear development	http://amigo.geneontology.org/amigo/term/GO:0048839	USH2A IFT27 TBX2 FAT4 MCM2
0.129702	4	139	3.99058	GO:0070304 positive regulation of stress-activated protein kinase signaling cascade	http://amigo.geneontology.org/amigo/term/GO:0070304	TRAF4 TRAF5 TRAF2 TRAF3
0.129702	2	29	9.56364	GO:0070886 positive regulation of calcineurin-NFAT signaling cascade	http://amigo.geneontology.org/amigo/term/GO:0070886	ERBB3 PTBP1
0.129702	13	935	1.92807	GO:0071345 cellular response to cytokine stimulus	http://amigo.geneontology.org/amigo/term/GO:0071345	TRAF5 TRAF2 TRAF3 TBK1 GAS6 MCM2 KAT2A FOXP1 HELLS CNOT9 STX8 CASP1 CASP8
0.129702	2	29	9.56364	GO:0106058 positive regulation of calcineurin-mediated signaling	http://amigo.geneontology.org/amigo/term/GO:0106058	ERBB3 PTBP1
0.129702	2	29	9.56364	GO:1904861 excitatory synapse assembly	http://amigo.geneontology.org/amigo/term/GO:1904861	PTPRS PTEN
0.129702	4	139	3.99058	GO:2000027 regulation of animal organ morphogenesis	http://amigo.geneontology.org/amigo/term/GO:2000027	WNT4 RYK ROBO2 RAC1
0.132079	3	78	5.33357	GO:0045661 regulation of myoblast differentiation	http://amigo.geneontology.org/amigo/term/GO:0045661	BTG1 KAT5 CDON
0.132079	3	78	5.33357	GO:0071479 cellular response to ionizing radiation	http://amigo.geneontology.org/amigo/term/GO:0071479	ATR H2AX GRB2
0.132147	5	212	3.27058	GO:0001763 morphogenesis of a branching structure	http://amigo.geneontology.org/amigo/term/GO:0001763	TBX2 WNT4 GRB2 FAT4 LRRK2
0.132147	20	1684	1.64694	GO:0006468 protein phosphorylation	http://amigo.geneontology.org/amigo/term/GO:0006468	AAK1 ATR TBK1 LRRK2 TRAF4 TRAF2 EGFR PTEN GAS6 MUSK CDON ERBB3 PTPRA LRP4 NEK8 RYK RAC1 CNOT9 MRNIP LRP1
0.133014	5	219	3.16604	GO:0000075 cell cycle checkpoint signaling	http://amigo.geneontology.org/amigo/term/GO:0000075	TIPIN MRNIP ATR H2AX NSUN2
0.133014	15	1165	1.78549	GO:0001932 regulation of protein phosphorylation	http://amigo.geneontology.org/amigo/term/GO:0001932	LRRK2 TRAF4 TRAF2 EGFR PTEN GAS6 CDON LRP4 MUSK ERBB3 RAC1 CNOT9 MRNIP LRP1 TBK1
0.133014	1	3	46.2242	GO:0003104 positive regulation of glomerular filtration	http://amigo.geneontology.org/amigo/term/GO:0003104	GAS6
0.133014	2	31	8.94663	GO:0006221 pyrimidine nucleotide biosynthetic process	http://amigo.geneontology.org/amigo/term/GO:0006221	DCTD PRPS1
0.133014	10	659	2.10429	GO:0007610 behavior	http://amigo.geneontology.org/amigo/term/GO:0007610	KAT2A UBE3A SDK1 DGKI PTEN BBS1 LRRK2 DCTN1 MUSK EGFR
0.133014	6	291	2.85923	GO:0007611 learning or memory	http://amigo.geneontology.org/amigo/term/GO:0007611	KAT2A UBE3A DGKI PTEN MUSK EGFR
0.133014	2	31	8.94663	GO:0008211 glucocorticoid metabolic process	http://amigo.geneontology.org/amigo/term/GO:0008211	WNT4 STAR
0.133014	24	2143	1.55303	GO:0008283 cell population proliferation	http://amigo.geneontology.org/amigo/term/GO:0008283	ERBB3 HELLS BTG1 EGFR PTEN GAS6 CDON TRAF5 KAT2A DPH1 TBX2 ECD WNT4 RYK BBS1 TBK1 FAT4 TIPIN ABCB1 FOXP1 PLCG1 PTPRM LRRK2 UTP20
0.133014	1	3	46.2242	GO:0009227 nucleotide-sugar catabolic process	http://amigo.geneontology.org/amigo/term/GO:0009227	MGAT1
0.133014	3	81	5.13603	GO:0010324 membrane invagination	http://amigo.geneontology.org/amigo/term/GO:0010324	RAC1 ABCA1 VAMP7
0.133014	18	1483	1.68315	GO:0010648 negative regulation of cell communication	http://amigo.geneontology.org/amigo/term/GO:0010648	NPRL2 LRP4 ERBB3 FOXP1 ITPR1 HEY1 GAS6 HELLS DGKI WNT4 PTEN LRRK2 CASP8 PTPRS CNOT9 NEDD4 LRP1 EGFR
0.133014	10	650	2.13343	GO:0010942 positive regulation of cell death	http://amigo.geneontology.org/amigo/term/GO:0010942	UBB LRRK2 CASP8 FOXP1 PTEN LRP1 PLCG1 TRAF2 BTG1 ATG9A
0.133014	1	3	46.2242	GO:0016480 negative regulation of transcription by RNA polymerase III	http://amigo.geneontology.org/amigo/term/GO:0016480	MAF1
[truncated: 463 more rows]

## Sheet: D.Geodia_barretti
Enrichment FDR	nGenes	Pathway Genes	Fold Enrichment	Pathway	URL	Genes
0.00012761	10	403	9.78908	GO:0044282 small molecule catabolic process	http://amigo.geneontology.org/amigo/term/GO:0044282	ETFA PCCB PCCA ETFB XDH NUDT5 DPYD AADAT ACMSD AMACR
[truncated: 603 more rows]

## Sheet: E.Geodia_hentscheli
Enrichment FDR	nGenes	Pathway Genes	Fold Enrichment	Pathway	URL	Genes
[truncated: 822 more rows]

## Sheet: F.Phakellia_ventilabrum
Enrichment FDR	nGenes	Pathway Genes	Fold Enrichment	Pathway	URL	Genes
[truncated: 602 more rows]

[truncated: 2 more sheets: G.Axinella_damicornis, H.Halichondria_panicea]
