# Supplementary material for: Sponge genomes reveal a pre-metazoan origin of the sex determination toolkit and sex chromosomes
Source: Research Square preprint supplement (doi:10.21203/rs.3.rs-8554461/v1), 2026-02-12
Supplement: Supplementary file 17 [file c559267c127be3526c11433a.xlsx]

## Sheet: A. Summary
RADSEX summary	n F	n M	in F	in M	N sex-specific loci	N total markers	Sexual system
Oscarella lobularis	4	3	0	3	634	4217600	XX/XY
			4	0	0
Chondrosia reniformis	13	7	0	5	144	6275916	ZZ/ZW
			0	6	19
			0	7	3
			5	0	192
			6	0	60
			7	0	191
Petrosia ficiformis	7	5	0	5	139	4958532	ZZ/ZW
			0	4	604
			7	0	439
			6	0	1704
Geodia hentscheli	6	4	0	4	1085	4289445	XX/XY
			6	0	32
Geodia barretti	6	4	0	4	1154	7044900	XX/XY
			6	0	203
Phakellia ventilabrum	5	3	0	3	473	1498758	XX/XY
			5	0	53
Axinella damicornis	5	3	0	3	178	3690224	XX/XY
			4	0	8
Halichondria panicea	4	8	0	8	0	8994200	ZZ/ZW
			0	7	12
			4	0	24
			3	0	306

## Sheet: B. Markers accumulation
Chi square tests fot accumulation of loci by chromosome
Chondrosia reniformis
Chrom	Count	Length	Freq
1	14	10413042	1.34447
2	17	10288994	1.65225
3	5	9415654	0.531031
4	24	8959380	2.67876
5	12	8804818	1.36289
6	14	8731016	1.60348
7	12	8459200	1.41857
8	4	8125224	0.492294
9	9	7704672	1.16812
10	6	7657449	0.783551
11	61	7633987	7.99058
12	13	7521688	1.72834
13	15	6903244	2.17289
14	7	6754398	1.03636
15	0	17451	0
Chi-squared test for given probabilities
data: frequencies
X-squared = 24.339, df = 13, p-value = 0.02815
> # standarized residues
[1] -0.38869351 -0.15415250 -1.00855989 0.62807925 -0.37465507 -0.19131842 -0.33222224 -1.03807835 -0.52307462 -0.81613106
[11] 4.67586761 -0.09617356 0.24259298 -0.62348061
Oscarella lobularis
Chrom	Count	Length	Freq
1	48	7397985	6.48825
2	12	4122402	2.91092
3	13	4000095	3.24992
4	11	3662450	3.00345
5	95	3616715	26.2669
6	9	3595068	2.50343
7	13	3501993	3.71217
8	7	3475296	2.01422
9	27	3311771	8.15274
10	16	3220065	4.96884
11	15	3219028	4.65979
12	7	2738375	2.55626
13	7	2691851	2.60044
14	11	2577018	4.2685
15	8	2484334	3.22018
16	9	2474678	3.63684
17	8	2385626	3.35342
18	12	2328717	5.15305
19	10	2167890	4.61278
20	8	2097693	3.81371
Chi-squared test for given probabilities
data: frequencies
X-squared = 101.69, df = 19, p-value = 2.641e-13
> # standarized residues
[1] 0.65284002 -0.97922714 -0.82456750 -0.93701277 9.67636828 -1.16513638 -0.61367788 -1.38832751 1.41221953 -0.04035265
[11] -0.18134996 -1.14103362 -1.12087734 -0.35986729 -0.83813741 -0.64804764 -0.77735063 0.04368779 -0.20279781 -0.56735208
Axinella damicornis
Chrom	Count	Lenght	Freq
1	7	22596834	0.309778
2	10	22185644	0.450742
3	12	20832181	0.576032
4	8	20563187	0.389045
5	14	20298512	0.689706
6	4	15688314	0.254967
7	5	14512404	0.344533
8	5	14211960	0.351816
9	7	13254158	0.528136
10	12	13047636	0.919707
11	4	12904918	0.309959
12	4	12445515	0.321401
13	2	11004821	0.181739
14	7	10761689	0.650456
Chi-squared test for given probabilities
data: frequencies
X-squared = 1.183, df = 13, p-value = 1
> # standarized residues
[1] -0.21486743 0.00358327 0.19774397 -0.09202830 0.37390336 -0.29980765 -0.16100800 -0.14972082 0.12352041 0.73033405
[11] -0.21458626 -0.19685535 -0.41328893 0.31307766
Halichondria panicea
Chrom	Count	Length	Freq
Chr1	41	18138809	2.26035
Chr2	13	8642571	1.50418
Chr3	12	8483533	1.41451
Chr4	19	7813905	2.43156
Chr5	16	7597148	2.10605
Chr6	15	7592338	1.97568
Chr7	6	7363180	0.814865
Chr8	12	7091591	1.69214
Chr9	15	7054234	2.12638
Chr10	9	6998024	1.28608
Chr11	18	6808682	2.64368
Chr12	18	6759720	2.66283
Chr13	12	6571531	1.82606
Chr14	14	6511711	2.14997
Chr15	5	5981790	0.83587
Chr16	10	5828375	1.71574
Chr17	13	5741248	2.26432
Chi-squared test for given probabilities
data: frequencies
X-squared = 2.6716, df = 16, p-value = 0.9999
> # standarized residues
[1] 0.29814419 -0.27255258 -0.34023409 0.42736513 0.18169506 0.08329587 -0.79279738 -0.13069219 0.19703792 -0.43716173
[11] 0.58745804 0.60191007 -0.02962425 0.21484191 -0.77694446 -0.11288133 0.30113983
Petrosia ficiformis
Chrom	Count	Length	Freq
1	234	63279122	3.6979
2	71	15999405	4.43767
3	56	11427112	4.90063
4	54	9942894	5.43101
5	26	8526170	3.04943
6	21	8186180	2.5653
7	23	7587133	3.03145
8	28	7091006	3.94866
9	83	7016685	11.8289
10	20	6870705	2.91091
11	21	6121522	3.43052
12	17	6113113	2.78091
13	30	6033917	4.97189
14	32	6019071	5.31644
15	34	5615395	6.05478
16	35	5393497	6.4893
17	10	5111720	1.95629
18	18	4740285	3.79724
19	1
	814
Chi-squared test for given probabilities
data: frequencies
X-squared = 18.88, df = 17, p-value = 0.3355
> # standarized residues
[1] -0.37921492 -0.01948627 0.20564026 0.46355527 -0.69454873 -0.92997214 -0.70329524 -0.25727555 3.57471414 -0.76191026
[11] -0.50923661 -0.82512717 0.24029659 0.40783814 0.76687889 0.97817194 -1.22611903 -0.33090931
Petrosia ficiformis
Chrom	Count	Length	Freq
CHR1	23	17765667	1.29463
CHR2	14	9138298	1.53201
CHR3	11	9380658	1.17263
CHR4	16	7746905	2.06534
CHR5	7	7712199	0.907653
CHR6	4	7959531	0.502542
CHR7	6	7828989	0.766382
CHR8	7	7566979	0.925072
CHR9	12	7148111	1.67877
CHR10	7	7068862	0.990258
CHR11	12	7120715	1.68522
CHR12	8	6760026	1.18343
CHR13	5	6950038	0.719421
CHR14	3	6518446	0.460232
CHR15	7	6937180	1.00906
CHR16	9	6918591	1.30084
CHR17	8	6570977	1.21747
CHR18	12	6632576	1.80925
CHR19	8	6109635	1.30941
CHR20	12	5977719	2.00745
CHR21	6	5913535	1.01462
CHR22	6	5629729	1.06577
CHR23	3	5659230	0.530107
CHR24	12	5337433	2.24827
CHR25	35	5391640	6.49153
Chi-squared test for given probabilities
data: frequencies
X-squared = 22.492, df = 24, p-value = 0.5499
> # standarized residues
[1] -0.11999446 0.08221958 -0.22392563 0.53653457 -0.44964283 -0.79473673 -0.56998417 -0.43480443 0.20722974 -0.37927529
[11] 0.21273170 -0.21472414 -0.60998874 -0.83077835 -0.36326293 -0.11470365 -0.18572069 0.31838484 -0.10740816 0.48722412
[21] -0.35852154 -0.31495012 -0.77125523 0.69236435 4.30698820

## Sheet: C. Chondrosia reniformis
RADSEX_tag	N of M	N of F	p_value	Corrected p_value	BLAST both in genome/transcriptome	Gene_ID	Transcript_ID in trinity transcriptome
195093	M:0	F:12	p:0.000399051	pcorr:0.000399051	-	Choren_v00_mik.OX359194.1G410.1	TRINITY_DN1829_c2_g1_i14
195093	M:0	F:12	p:0.000399051	pcorr:0.000399051	-	Choren_v00_mik.OX359194.1G410.1	TRINITY_DN1829_c2_g1_i20
195093	M:0	F:12	p:0.000399051	pcorr:0.000399051	-	Choren_v00_mik.OX359194.1G410.1	TRINITY_DN1829_c2_g1_i2
195093	M:0	F:12	p:0.000399051	pcorr:0.000399051	-	Choren_v00_mik.OX359194.1G410.1	TRINITY_DN96266_c0_g1_i5
195093	M:0	F:12	p:0.000399051	pcorr:0.000399051	-	Choren_v00_mik.OX359194.1G410.1	TRINITY_DN52364_c0_g3_i1
197906	M:4	F:0	p:0.0138458	pcorr:0.0138458	LOXH1_MOUSELipoxygenase homology domain-containing protein 1 OS=Mus musculus OX=10090 GN=Loxhd1 PE=2 SV=1	#N/A	TRINITY_DN3211_c0_g1_i14
197906	M:4	F:0	p:0.0138458	pcorr:0.0138458	LOXH1_MOUSELipoxygenase homology domain-containing protein 1 OS=Mus musculus OX=10090 GN=Loxhd1 PE=2 SV=1	#N/A	TRINITY_DN3211_c0_g1_i13
197906	M:4	F:0	p:0.0138458	pcorr:0.0138458	LOXH1_MOUSELipoxygenase homology domain-containing protein 1 OS=Mus musculus OX=10090 GN=Loxhd1 PE=2 SV=1	#N/A	TRINITY_DN3211_c0_g1_i3
197906	M:4	F:0	p:0.0138458	pcorr:0.0138458	LOXH1_MOUSELipoxygenase homology domain-containing protein 1 OS=Mus musculus OX=10090 GN=Loxhd1 PE=2 SV=1	#N/A	TRINITY_DN3211_c0_g1_i11
197906	M:4	F:0	p:0.0138458	pcorr:0.0138458	LOXH1_MOUSELipoxygenase homology domain-containing protein 1 OS=Mus musculus OX=10090 GN=Loxhd1 PE=2 SV=1	#N/A	TRINITY_DN3211_c0_g1_i6
198747	M:6	F:3	p:0.0267948	pcorr:0.0267948	Y9853_DICDIProbable serine/threonine-protein kinase DDB_G0271538 OS=Dictyostelium discoideum OX=44689 GN=DDB_G0271538 PE=3 SV=1	Choren_v00_mik.OX359197.1G650.1	TRINITY_DN39511_c0_g1_i3
198747	M:6	F:3	p:0.0267948	pcorr:0.0267948	Y9853_DICDIProbable serine/threonine-protein kinase DDB_G0271538 OS=Dictyostelium discoideum OX=44689 GN=DDB_G0271538 PE=3 SV=1	Choren_v00_mik.OX359197.1G650.1	TRINITY_DN39511_c0_g1_i7
198747	M:6	F:3	p:0.0267948	pcorr:0.0267948	Y9871_DICDIProbable serine/threonine-protein kinase DDB_G0271682 OS=Dictyostelium discoideum OX=44689 GN=DDB_G0271682 PE=3 SV=2	Choren_v00_mik.OX359197.1G650.1	TRINITY_DN12945_c0_g1_i11
198747	M:6	F:3	p:0.0267948	pcorr:0.0267948	Y9871_DICDIProbable serine/threonine-protein kinase DDB_G0271682 OS=Dictyostelium discoideum OX=44689 GN=DDB_G0271682 PE=3 SV=2	Choren_v00_mik.OX359197.1G650.1	TRINITY_DN12945_c0_g1_i6
198747	M:6	F:3	p:0.0267948	pcorr:0.0267948	Y9871_DICDIProbable serine/threonine-protein kinase DDB_G0271682 OS=Dictyostelium discoideum OX=44689 GN=DDB_G0271682 PE=3 SV=2	Choren_v00_mik.OX359197.1G650.1	TRINITY_DN12945_c0_g1_i4
199760	M:6	F:3	p:0.0267948	pcorr:0.0267948	-	#N/A	TRINITY_DN24840_c0_g1_i9
199760	M:6	F:3	p:0.0267948	pcorr:0.0267948	TENA_CHICKTenascin OS=Gallus gallus OX=9031 GN=TNC PE=1 SV=2	#N/A	TRINITY_DN24840_c0_g1_i5
199760	M:6	F:3	p:0.0267948	pcorr:0.0267948	-	#N/A	TRINITY_DN24840_c0_g1_i2
199760	M:6	F:3	p:0.0267948	pcorr:0.0267948	-	#N/A	TRINITY_DN24840_c0_g1_i6
199760	M:6	F:3	p:0.0267948	pcorr:0.0267948	-	#N/A	TRINITY_DN24840_c0_g1_i11
206499	M:4	F:0	p:0.0138458	pcorr:0.0138458	RS27A_DROMEUbiquitin-40S ribosomal protein S27a OS=Drosophila melanogaster OX=7227 GN=RpS27A PE=1 SV=2	#N/A	TRINITY_DN15191_c0_g1_i3
206499	M:4	F:0	p:0.0138458	pcorr:0.0138458	RS27A_DROMEUbiquitin-40S ribosomal protein S27a OS=Drosophila melanogaster OX=7227 GN=RpS27A PE=1 SV=2	#N/A	TRINITY_DN15191_c0_g1_i5
206499	M:4	F:0	p:0.0138458	pcorr:0.0138458	RS27A_SOLLCUbiquitin-40S ribosomal protein S27a OS=Solanum lycopersicum OX=4081 GN=UBI3 PE=1 SV=2	#N/A	TRINITY_DN15191_c0_g1_i1
210102	M:5	F:1	p:0.0140786	pcorr:0.0140786	-	#N/A	TRINITY_DN110403_c1_g1_i1
210545	M:0	F:11	p:0.00159493	pcorr:0.00159493	-	#N/A	TRINITY_DN6844_c0_g1_i7
210545	M:0	F:11	p:0.00159493	pcorr:0.00159493	-	#N/A	TRINITY_DN6844_c0_g1_i12
210545	M:0	F:11	p:0.00159493	pcorr:0.00159493	-	#N/A	TRINITY_DN6844_c0_g1_i1
213386	M:6	F:3	p:0.0267948	pcorr:0.0267948	-	#N/A	TRINITY_DN145991_c0_g1_i1
215957	M:3	F:13	p:0.0138458	pcorr:0.0138458	-	Choren_v00_mik.OX359200.1G527.1	TRINITY_DN8336_c0_g1_i4
215957	M:3	F:13	p:0.0138458	pcorr:0.0138458	-	Choren_v00_mik.OX359200.1G527.1	TRINITY_DN48324_c0_g1_i2
215957	M:3	F:13	p:0.0138458	pcorr:0.0138458	-	Choren_v00_mik.OX359200.1G527.1	TRINITY_DN74952_c0_g1_i1
215957	M:3	F:13	p:0.0138458	pcorr:0.0138458	-	Choren_v00_mik.OX359200.1G527.1	TRINITY_DN74952_c0_g1_i3
217977	M:5	F:1	p:0.0140786	pcorr:0.0140786	-	#N/A	TRINITY_DN1829_c2_g1_i8
217977	M:5	F:1	p:0.0140786	pcorr:0.0140786	-	#N/A	TRINITY_DN1829_c2_g1_i14
217977	M:5	F:1	p:0.0140786	pcorr:0.0140786	-	#N/A	TRINITY_DN1829_c2_g1_i19
217977	M:5	F:1	p:0.0140786	pcorr:0.0140786	-	#N/A	TRINITY_DN1829_c2_g1_i4
217977	M:5	F:1	p:0.0140786	pcorr:0.0140786	-	#N/A	TRINITY_DN1829_c2_g1_i20
219228	M:5	F:1	p:0.0140786	pcorr:0.0140786	-	Choren_v00_mik.OX359189.1G1487.2	TRINITY_DN22166_c0_g1_i5
219228	M:5	F:1	p:0.0140786	pcorr:0.0140786	-	Choren_v00_mik.OX359189.1G1487.2	TRINITY_DN22166_c0_g1_i4
219228	M:5	F:1	p:0.0140786	pcorr:0.0140786	-	Choren_v00_mik.OX359189.1G1487.2	TRINITY_DN22166_c0_g1_i3
219228	M:5	F:1	p:0.0140786	pcorr:0.0140786	-	Choren_v00_mik.OX359189.1G1487.2	TRINITY_DN61614_c0_g2_i5
219228	M:5	F:1	p:0.0140786	pcorr:0.0140786	-	Choren_v00_mik.OX359189.1G1487.2	TRINITY_DN22166_c0_g1_i1
223550	M:5	F:1	p:0.0140786	pcorr:0.0140786	-	#N/A	TRINITY_DN116466_c0_g1_i1
224667	M:0	F:8	p:0.0277373	pcorr:0.0277373	TPR_MOUSENucleoprotein TPR OS=Mus musculus OX=10090 GN=Tpr PE=1 SV=1	#N/A	TRINITY_DN528_c1_g1_i4
224667	M:0	F:8	p:0.0277373	pcorr:0.0277373	TPR_MOUSENucleoprotein TPR OS=Mus musculus OX=10090 GN=Tpr PE=1 SV=1	#N/A	TRINITY_DN528_c1_g1_i7
224667	M:0	F:8	p:0.0277373	pcorr:0.0277373	TPR_MOUSENucleoprotein TPR OS=Mus musculus OX=10090 GN=Tpr PE=1 SV=1	#N/A	TRINITY_DN528_c1_g1_i11
224667	M:0	F:8	p:0.0277373	pcorr:0.0277373	TPR_MOUSENucleoprotein TPR OS=Mus musculus OX=10090 GN=Tpr PE=1 SV=1	#N/A	TRINITY_DN528_c1_g1_i5
224667	M:0	F:8	p:0.0277373	pcorr:0.0277373	LMLN_CAEBRLeishmanolysin-like peptidase OS=Caenorhabditis briggsae OX=6238 GN=CBG03556 PE=3 SV=2	#N/A	TRINITY_DN528_c1_g1_i10
234455	M:6	F:2	p:0.00977293	pcorr:0.00977293	-	Choren_v00_mik.OX359192.1G235.1	TRINITY_DN2928_c2_g1_i1
234455	M:6	F:2	p:0.00977293	pcorr:0.00977293	-	Choren_v00_mik.OX359192.1G235.1	TRINITY_DN2928_c2_g1_i3
234455	M:6	F:2	p:0.00977293	pcorr:0.00977293	-	Choren_v00_mik.OX359192.1G235.1	TRINITY_DN2928_c2_g1_i2
234455	M:6	F:2	p:0.00977293	pcorr:0.00977293	SLX1_MOUSEStructure-specific endonuclease subunit SLX1 OS=Mus musculus OX=10090 GN=Slx1b PE=2 SV=1	Choren_v00_mik.OX359192.1G235.1	TRINITY_DN29139_c0_g1_i2
234455	M:6	F:2	p:0.00977293	pcorr:0.00977293	SLX1_XENLAStructure-specific endonuclease subunit slx1 OS=Xenopus laevis OX=8355 GN=slx1a PE=2 SV=1	Choren_v00_mik.OX359192.1G235.1	TRINITY_DN29139_c0_g1_i3
237401	M:2	F:11	p:0.0439132	pcorr:0.0439132	-	#N/A	TRINITY_DN5193_c0_g1_i4
237401	M:2	F:11	p:0.0439132	pcorr:0.0439132	-	#N/A	TRINITY_DN5193_c0_g1_i10
237401	M:2	F:11	p:0.0439132	pcorr:0.0439132	-	#N/A	TRINITY_DN5193_c0_g1_i7
237401	M:2	F:11	p:0.0439132	pcorr:0.0439132	-	#N/A	TRINITY_DN5193_c0_g1_i1
237401	M:2	F:11	p:0.0439132	pcorr:0.0439132	-	#N/A	TRINITY_DN5193_c0_g1_i2
246169	M:5	F:2	p:0.0439132	pcorr:0.0439132	GRPE_ALKCKProtein GrpE OS=Alkalihalobacillus clausii (strain KSM-K16) OX=66692 GN=grpE PE=3 SV=1	#N/A	TRINITY_DN176878_c0_g1_i2
246169	M:5	F:2	p:0.0439132	pcorr:0.0439132	GRPE_CLOP1Protein GrpE OS=Clostridium perfringens (strain ATCC 13124 / DSM 756 / JCM 1290 / NCIMB 6125 / NCTC 8237 / Type A) OX=195103 GN=grpE PE=3 SV=1	#N/A	TRINITY_DN176878_c0_g1_i1
260110	M:4	F:0	p:0.0138458	pcorr:0.0138458	-	Choren_v00_mik.OX359192.1G577.1	TRINITY_DN1011_c0_g1_i2
260110	M:4	F:0	p:0.0138458	pcorr:0.0138458	-	Choren_v00_mik.OX359192.1G577.1	TRINITY_DN1011_c0_g1_i1
260110	M:4	F:0	p:0.0138458	pcorr:0.0138458	-	Choren_v00_mik.OX359192.1G577.1	TRINITY_DN1011_c0_g1_i4
260110	M:4	F:0	p:0.0138458	pcorr:0.0138458	-	Choren_v00_mik.OX359192.1G577.1	TRINITY_DN1011_c0_g1_i12
260110	M:4	F:0	p:0.0138458	pcorr:0.0138458	-	Choren_v00_mik.OX359192.1G577.1	TRINITY_DN1011_c0_g1_i5
269465	M:5	F:1	p:0.0140786	pcorr:0.0140786	GLCP_STAESGlucose transporter GlcP OS=Staphylococcus epidermidis (strain ATCC 12228 / FDA PCI 1200) OX=176280 GN=glcP PE=1 SV=2	Choren_v00_mik.OX359195.1G890.1	TRINITY_DN2765_c0_g1_i34
269465	M:5	F:1	p:0.0140786	pcorr:0.0140786	ERDL6_ARATHSugar transporter ERD6-like 6 OS=Arabidopsis thaliana OX=3702 GN=At1g75220 PE=1 SV=1	Choren_v00_mik.OX359195.1G890.1	TRINITY_DN2765_c0_g1_i15
269465	M:5	F:1	p:0.0140786	pcorr:0.0140786	GTR8_MOUSESolute carrier family 2, facilitated glucose transporter member 8 OS=Mus musculus OX=10090 GN=Slc2a8 PE=1 SV=2	Choren_v00_mik.OX359195.1G890.1	TRINITY_DN2765_c0_g1_i19
269465	M:5	F:1	p:0.0140786	pcorr:0.0140786	GTR8_MOUSESolute carrier family 2, facilitated glucose transporter member 8 OS=Mus musculus OX=10090 GN=Slc2a8 PE=1 SV=2	Choren_v00_mik.OX359195.1G890.1	TRINITY_DN2765_c0_g1_i19
269465	M:5	F:1	p:0.0140786	pcorr:0.0140786	ERDL6_ARATHSugar transporter ERD6-like 6 OS=Arabidopsis thaliana OX=3702 GN=At1g75220 PE=1 SV=1	Choren_v00_mik.OX359195.1G890.1	TRINITY_DN2765_c0_g1_i26
279841	M:5	F:1	p:0.0140786	pcorr:0.0140786	-	#N/A	TRINITY_DN6916_c1_g1_i4
279841	M:5	F:1	p:0.0140786	pcorr:0.0140786	-	#N/A	TRINITY_DN6916_c1_g1_i1
279841	M:5	F:1	p:0.0140786	pcorr:0.0140786	-	#N/A	TRINITY_DN6916_c1_g1_i3
285003	M:1	F:11	p:0.00977293	pcorr:0.00977293	-	#N/A	TRINITY_DN61661_c0_g1_i7
285003	M:1	F:11	p:0.00977293	pcorr:0.00977293	-	#N/A	TRINITY_DN61661_c0_g1_i1
301683	M:7	F:3	p:0.00491056	pcorr:0.00491056	-	#N/A	TRINITY_DN50402_c0_g2_i10
301683	M:7	F:3	p:0.00491056	pcorr:0.00491056	-	#N/A	TRINITY_DN50402_c0_g2_i6
301683	M:7	F:3	p:0.00491056	pcorr:0.00491056	-	#N/A	TRINITY_DN50402_c0_g2_i2
301683	M:7	F:3	p:0.00491056	pcorr:0.00491056	-	#N/A	TRINITY_DN50402_c0_g2_i9
301683	M:7	F:3	p:0.00491056	pcorr:0.00491056	-	#N/A	TRINITY_DN50402_c0_g1_i1
315118	M:4	F:0	p:0.0138458	pcorr:0.0138458	CH601_ROSCSChaperonin GroEL 1 OS=Roseiflexus castenholzii (strain DSM 13941 / HLO8) OX=383372 GN=groEL1 PE=3 SV=1	#N/A	TRINITY_DN36278_c0_g2_i2
315118	M:4	F:0	p:0.0138458	pcorr:0.0138458	CH601_ROSCSChaperonin GroEL 1 OS=Roseiflexus castenholzii (strain DSM 13941 / HLO8) OX=383372 GN=groEL1 PE=3 SV=1	#N/A	TRINITY_DN36278_c0_g2_i1
331646	M:5	F:1	p:0.0140786	pcorr:0.0140786	-	#N/A	TRINITY_DN24883_c0_g1_i1
331877	M:5	F:1	p:0.0140786	pcorr:0.0140786	-	#N/A	TRINITY_DN76_c0_g3_i5
331877	M:5	F:1	p:0.0140786	pcorr:0.0140786	-	#N/A	TRINITY_DN76_c0_g3_i5
331877	M:5	F:1	p:0.0140786	pcorr:0.0140786	-	#N/A	TRINITY_DN76_c0_g3_i7
331877	M:5	F:1	p:0.0140786	pcorr:0.0140786	-	#N/A	TRINITY_DN76_c0_g3_i7
331877	M:5	F:1	p:0.0140786	pcorr:0.0140786	-	#N/A	TRINITY_DN19072_c0_g4_i1
331877	M:5	F:1	p:0.0140786	pcorr:0.0140786	-	#N/A	TRINITY_DN36590_c0_g2_i1
331877	M:5	F:1	p:0.0140786	pcorr:0.0140786	-	#N/A	TRINITY_DN36590_c0_g1_i4
356378	M:7	F:4	p:0.012518	pcorr:0.012518	FAF1_HUMANFAS-associated factor 1 OS=Homo sapiens OX=9606 GN=FAF1 PE=1 SV=2	#N/A	TRINITY_DN4297_c0_g1_i7
356378	M:7	F:4	p:0.012518	pcorr:0.012518	FAF1_HUMANFAS-associated factor 1 OS=Homo sapiens OX=9606 GN=FAF1 PE=1 SV=2	#N/A	TRINITY_DN4297_c0_g1_i3
356378	M:7	F:4	p:0.012518	pcorr:0.012518	FAF1_HUMANFAS-associated factor 1 OS=Homo sapiens OX=9606 GN=FAF1 PE=1 SV=2	#N/A	TRINITY_DN4297_c0_g1_i6
379140	M:1	F:11	p:0.00977293	pcorr:0.00977293	-	Choren_v00_mik.OX359192.1G235.1	TRINITY_DN65366_c0_g1_i5
379140	M:1	F:11	p:0.00977293	pcorr:0.00977293	-	Choren_v00_mik.OX359192.1G235.1	TRINITY_DN65366_c0_g1_i10
379140	M:1	F:11	p:0.00977293	pcorr:0.00977293	-	Choren_v00_mik.OX359192.1G235.1	TRINITY_DN65_c0_g1_i8
379140	M:1	F:11	p:0.00977293	pcorr:0.00977293	-	Choren_v00_mik.OX359192.1G235.1	TRINITY_DN65_c0_g1_i2
379140	M:1	F:11	p:0.00977293	pcorr:0.00977293	-	Choren_v00_mik.OX359192.1G235.1	TRINITY_DN2449_c0_g1_i8
387931	M:0	F:9	p:0.012518	pcorr:0.012518	-	Choren_v00_mik.OX359194.1G562.2	TRINITY_DN55832_c0_g1_i1
405966	M:5	F:1	p:0.0140786	pcorr:0.0140786	YG31B_YEASTTransposon Ty3-G Gag-Pol polyprotein OS=Saccharomyces cerevisiae (strain ATCC 204508 / S288c) OX=559292 GN=TY3B-G PE=1 SV=3	Choren_v00_mik.OX359190.1G1097.1	TRINITY_DN266705_c0_g1_i1
405966	M:5	F:1	p:0.0140786	pcorr:0.0140786	-	Choren_v00_mik.OX359190.1G1097.1	TRINITY_DN3224_c0_g1_i6
405966	M:5	F:1	p:0.0140786	pcorr:0.0140786	-	Choren_v00_mik.OX359190.1G1097.1	TRINITY_DN15704_c0_g1_i5
405966	M:5	F:1	p:0.0140786	pcorr:0.0140786	-	Choren_v00_mik.OX359190.1G1097.1	TRINITY_DN79759_c0_g2_i1
405966	M:5	F:1	p:0.0140786	pcorr:0.0140786	-	Choren_v00_mik.OX359190.1G1097.1	TRINITY_DN117346_c0_g1_i2
408966	M:1	F:11	p:0.00977293	pcorr:0.00977293	KLDC1_MOUSEKelch domain-containing protein 1 OS=Mus musculus OX=10090 GN=Klhdc1 PE=2 SV=1	Choren_v00_mik.OX359193.1G1313.1	TRINITY_DN1776_c0_g3_i4
408966	M:1	F:11	p:0.00977293	pcorr:0.00977293	KLDC1_MOUSEKelch domain-containing protein 1 OS=Mus musculus OX=10090 GN=Klhdc1 PE=2 SV=1	Choren_v00_mik.OX359193.1G1313.1	TRINITY_DN1776_c0_g3_i1
408966	M:1	F:11	p:0.00977293	pcorr:0.00977293	KLDC1_MOUSEKelch domain-containing protein 1 OS=Mus musculus OX=10090 GN=Klhdc1 PE=2 SV=1	Choren_v00_mik.OX359193.1G1313.1	TRINITY_DN1776_c0_g1_i1
408966	M:1	F:11	p:0.00977293	pcorr:0.00977293	-	Choren_v00_mik.OX359193.1G1313.1	TRINITY_DN15423_c0_g1_i2
408966	M:1	F:11	p:0.00977293	pcorr:0.00977293	-	Choren_v00_mik.OX359193.1G1313.1	TRINITY_DN15423_c0_g1_i1
411987	M:0	F:11	p:0.00159493	pcorr:0.00159493	-	#N/A	TRINITY_DN2928_c2_g1_i1
411987	M:0	F:11	p:0.00159493	pcorr:0.00159493	-	#N/A	TRINITY_DN2928_c2_g1_i3
411987	M:0	F:11	p:0.00159493	pcorr:0.00159493	-	#N/A	TRINITY_DN2928_c2_g1_i2
411987	M:0	F:11	p:0.00159493	pcorr:0.00159493	-	#N/A	TRINITY_DN79240_c1_g1_i2
411987	M:0	F:11	p:0.00159493	pcorr:0.00159493	MBTP1_CRIGRMembrane-bound transcription factor site-1 protease OS=Cricetulus griseus OX=10029 GN=MBTPS1 PE=1 SV=2	#N/A	TRINITY_DN2356_c1_g1_i3
417468	M:2	F:11	p:0.0439132	pcorr:0.0439132	-	#N/A	TRINITY_DN307064_c0_g1_i1
419957	M:7	F:5	p:0.0277373	pcorr:0.0277373	-	#N/A	TRINITY_DN102736_c0_g3_i3
419957	M:7	F:5	p:0.0277373	pcorr:0.0277373	-	#N/A	TRINITY_DN102736_c0_g3_i4
419957	M:7	F:5	p:0.0277373	pcorr:0.0277373	-	#N/A	TRINITY_DN102736_c0_g3_i1
419957	M:7	F:5	p:0.0277373	pcorr:0.0277373	-	#N/A	TRINITY_DN102736_c0_g3_i2
421211	M:4	F:0	p:0.0138458	pcorr:0.0138458	POL2_DROMERetrovirus-related Pol polyprotein from transposon 297 OS=Drosophila melanogaster OX=7227 GN=pol PE=4 SV=1	Choren_v00_mik.OX359194.1G561.1	TRINITY_DN13427_c0_g1_i6
421211	M:4	F:0	p:0.0138458	pcorr:0.0138458	POL2_DROMERetrovirus-related Pol polyprotein from transposon 297 OS=Drosophila melanogaster OX=7227 GN=pol PE=4 SV=1	Choren_v00_mik.OX359194.1G561.1	TRINITY_DN13427_c0_g1_i7
421211	M:4	F:0	p:0.0138458	pcorr:0.0138458	POL2_DROMERetrovirus-related Pol polyprotein from transposon 297 OS=Drosophila melanogaster OX=7227 GN=pol PE=4 SV=1	Choren_v00_mik.OX359194.1G561.1	TRINITY_DN13427_c0_g1_i4
422539	M:0	F:13	p:6.87148e-05	pcorr:6.87148e-05	P20D2_MOUSEXaa-Arg dipeptidase OS=Mus musculus OX=10090 GN=Pm20d2 PE=1 SV=1	Choren_v00_mik.OX359196.1G218.1	TRINITY_DN1345_c0_g1_i5
422539	M:0	F:13	p:6.87148e-05	pcorr:6.87148e-05	P20D2_MOUSEXaa-Arg dipeptidase OS=Mus musculus OX=10090 GN=Pm20d2 PE=1 SV=1	Choren_v00_mik.OX359196.1G218.1	TRINITY_DN1345_c0_g1_i2
422539	M:0	F:13	p:6.87148e-05	pcorr:6.87148e-05	P20D2_MOUSEXaa-Arg dipeptidase OS=Mus musculus OX=10090 GN=Pm20d2 PE=1 SV=1	Choren_v00_mik.OX359196.1G218.1	TRINITY_DN1345_c0_g1_i7
422539	M:0	F:13	p:6.87148e-05	pcorr:6.87148e-05	P20D2_MOUSEXaa-Arg dipeptidase OS=Mus musculus OX=10090 GN=Pm20d2 PE=1 SV=1	Choren_v00_mik.OX359196.1G218.1	TRINITY_DN1345_c0_g1_i15
422539	M:0	F:13	p:6.87148e-05	pcorr:6.87148e-05	P20D2_MOUSEXaa-Arg dipeptidase OS=Mus musculus OX=10090 GN=Pm20d2 PE=1 SV=1	Choren_v00_mik.OX359196.1G218.1	TRINITY_DN1345_c0_g1_i14
424010	M:5	F:0	p:0.00290775	pcorr:0.00290775	-	#N/A	TRINITY_DN31857_c1_g1_i1
424010	M:5	F:0	p:0.00290775	pcorr:0.00290775	-	#N/A	TRINITY_DN20194_c0_g3_i1
424010	M:5	F:0	p:0.00290775	pcorr:0.00290775	-	#N/A	TRINITY_DN5915_c1_g1_i1
424010	M:5	F:0	p:0.00290775	pcorr:0.00290775	-	#N/A	TRINITY_DN10993_c1_g1_i4
424010	M:5	F:0	p:0.00290775	pcorr:0.00290775	-	#N/A	TRINITY_DN10993_c1_g1_i1
439856	M:0	F:13	p:6.87148e-05	pcorr:6.87148e-05	PO21_NASVIRetrovirus-related Pol polyprotein from type-1 retrotransposable element R2 (Fragment) OS=Nasonia vitripennis OX=7425 PE=4 SV=2	Choren_v00_mik.OX359196.1G1139.1	TRINITY_DN1825_c1_g1_i12
439856	M:0	F:13	p:6.87148e-05	pcorr:6.87148e-05	PO21_NASVIRetrovirus-related Pol polyprotein from type-1 retrotransposable element R2 (Fragment) OS=Nasonia vitripennis OX=7425 PE=4 SV=2	Choren_v00_mik.OX359196.1G1139.1	TRINITY_DN1825_c1_g1_i4
439856	M:0	F:13	p:6.87148e-05	pcorr:6.87148e-05	PO21_NASVIRetrovirus-related Pol polyprotein from type-1 retrotransposable element R2 (Fragment) OS=Nasonia vitripennis OX=7425 PE=4 SV=2	Choren_v00_mik.OX359196.1G1139.1	TRINITY_DN1825_c1_g1_i15
439856	M:0	F:13	p:6.87148e-05	pcorr:6.87148e-05	PO21_NASVIRetrovirus-related Pol polyprotein from type-1 retrotransposable element R2 (Fragment) OS=Nasonia vitripennis OX=7425 PE=4 SV=2	Choren_v00_mik.OX359196.1G1139.1	TRINITY_DN1825_c1_g1_i6
439856	M:0	F:13	p:6.87148e-05	pcorr:6.87148e-05	-	Choren_v00_mik.OX359196.1G1139.1	TRINITY_DN98110_c0_g3_i1
448935	M:6	F:3	p:0.0267948	pcorr:0.0267948	-	#N/A	TRINITY_DN9015_c1_g2_i1
448935	M:6	F:3	p:0.0267948	pcorr:0.0267948	-	#N/A	TRINITY_DN82241_c0_g3_i2
448935	M:6	F:3	p:0.0267948	pcorr:0.0267948	-	#N/A	TRINITY_DN9015_c1_g1_i1
448935	M:6	F:3	p:0.0267948	pcorr:0.0267948	-	#N/A	TRINITY_DN187436_c0_g1_i1
448935	M:6	F:3	p:0.0267948	pcorr:0.0267948	-	#N/A	TRINITY_DN19484_c0_g1_i2
458775	M:4	F:0	p:0.0138458	pcorr:0.0138458	-	#N/A	TRINITY_DN12673_c0_g1_i2
458775	M:4	F:0	p:0.0138458	pcorr:0.0138458	PTPRQ_RATPhosphatidylinositol phosphatase PTPRQ OS=Rattus norvegicus OX=10116 GN=Ptprq PE=1 SV=1	#N/A	TRINITY_DN12673_c0_g1_i1
458775	M:4	F:0	p:0.0138458	pcorr:0.0138458	PTPRQ_MOUSEPhosphatidylinositol phosphatase PTPRQ OS=Mus musculus OX=10090 GN=Ptprq PE=1 SV=1	#N/A	TRINITY_DN12673_c0_g1_i4
458775	M:4	F:0	p:0.0138458	pcorr:0.0138458	PTPRD_HUMANReceptor-type tyrosine-protein phosphatase delta OS=Homo sapiens OX=9606 GN=PTPRD PE=1 SV=2	#N/A	TRINITY_DN4788_c1_g1_i10
458775	M:4	F:0	p:0.0138458	pcorr:0.0138458	PTPRD_HUMANReceptor-type tyrosine-protein phosphatase delta OS=Homo sapiens OX=9606 GN=PTPRD PE=1 SV=2	#N/A	TRINITY_DN4788_c1_g1_i6
462047	M:4	F:0	p:0.0138458	pcorr:0.0138458	-	#N/A	TRINITY_DN2223_c3_g1_i2
462047	M:4	F:0	p:0.0138458	pcorr:0.0138458	-	#N/A	TRINITY_DN2223_c3_g1_i1
462047	M:4	F:0	p:0.0138458	pcorr:0.0138458	-	#N/A	TRINITY_DN35531_c0_g2_i1
464361	M:5	F:1	p:0.0140786	pcorr:0.0140786	-	Choren_v00_mik.OX359201.1G371.1	TRINITY_DN12613_c0_g1_i16
464361	M:5	F:1	p:0.0140786	pcorr:0.0140786	-	Choren_v00_mik.OX359201.1G371.1	TRINITY_DN12613_c0_g1_i4
464361	M:5	F:1	p:0.0140786	pcorr:0.0140786	-	Choren_v00_mik.OX359201.1G371.1	TRINITY_DN12613_c0_g1_i11
464361	M:5	F:1	p:0.0140786	pcorr:0.0140786	-	Choren_v00_mik.OX359201.1G371.1	TRINITY_DN7674_c0_g1_i12
464361	M:5	F:1	p:0.0140786	pcorr:0.0140786	-	Choren_v00_mik.OX359201.1G371.1	TRINITY_DN21381_c0_g1_i6
477307	M:4	F:0	p:0.0138458	pcorr:0.0138458	-	#N/A	TRINITY_DN22640_c0_g1_i7
483032	M:0	F:13	p:6.87148e-05	pcorr:6.87148e-05	-	#N/A	TRINITY_DN2928_c2_g1_i1
483032	M:0	F:13	p:6.87148e-05	pcorr:6.87148e-05	-	#N/A	TRINITY_DN2928_c2_g1_i3
483032	M:0	F:13	p:6.87148e-05	pcorr:6.87148e-05	-	#N/A	TRINITY_DN2928_c2_g1_i2
483032	M:0	F:13	p:6.87148e-05	pcorr:6.87148e-05	-	#N/A	TRINITY_DN19107_c2_g1_i1
483032	M:0	F:13	p:6.87148e-05	pcorr:6.87148e-05	-	#N/A	TRINITY_DN86338_c0_g2_i2
483291	M:0	F:10	p:0.00491056	pcorr:0.00491056	PO21_NASVIRetrovirus-related Pol polyprotein from type-1 retrotransposable element R2 (Fragment) OS=Nasonia vitripennis OX=7425 PE=4 SV=2	Choren_v00_mik.OX359201.1G463.1	TRINITY_DN1825_c1_g1_i12
483291	M:0	F:10	p:0.00491056	pcorr:0.00491056	PO21_NASVIRetrovirus-related Pol polyprotein from type-1 retrotransposable element R2 (Fragment) OS=Nasonia vitripennis OX=7425 PE=4 SV=2	Choren_v00_mik.OX359201.1G463.1	TRINITY_DN1825_c1_g1_i4
483291	M:0	F:10	p:0.00491056	pcorr:0.00491056	PO21_NASVIRetrovirus-related Pol polyprotein from type-1 retrotransposable element R2 (Fragment) OS=Nasonia vitripennis OX=7425 PE=4 SV=2	Choren_v00_mik.OX359201.1G463.1	TRINITY_DN1825_c1_g1_i15
483291	M:0	F:10	p:0.00491056	pcorr:0.00491056	PO21_NASVIRetrovirus-related Pol polyprotein from type-1 retrotransposable element R2 (Fragment) OS=Nasonia vitripennis OX=7425 PE=4 SV=2	Choren_v00_mik.OX359201.1G463.1	TRINITY_DN1825_c1_g1_i6
483291	M:0	F:10	p:0.00491056	pcorr:0.00491056	-	Choren_v00_mik.OX359201.1G463.1	TRINITY_DN98110_c0_g3_i1
487855	M:5	F:2	p:0.0439132	pcorr:0.0439132	-	#N/A	TRINITY_DN67949_c0_g1_i1
505722	M:7	F:4	p:0.012518	pcorr:0.012518	-	#N/A	TRINITY_DN63690_c0_g1_i1
505722	M:7	F:4	p:0.012518	pcorr:0.012518	-	#N/A	TRINITY_DN63690_c0_g1_i2
508538	M:0	F:13	p:6.87148e-05	pcorr:6.87148e-05	-	#N/A	TRINITY_DN10333_c1_g1_i1
508538	M:0	F:13	p:6.87148e-05	pcorr:6.87148e-05	-	#N/A	TRINITY_DN30152_c0_g1_i1
508538	M:0	F:13	p:6.87148e-05	pcorr:6.87148e-05	-	#N/A	TRINITY_DN30152_c0_g1_i2
508538	M:0	F:13	p:6.87148e-05	pcorr:6.87148e-05	-	#N/A	TRINITY_DN17346_c0_g2_i1
508538	M:0	F:13	p:6.87148e-05	pcorr:6.87148e-05	-	#N/A	TRINITY_DN54132_c0_g1_i2
509396	M:5	F:2	p:0.0439132	pcorr:0.0439132	-	#N/A	TRINITY_DN118023_c1_g1_i1
520304	M:5	F:2	p:0.0439132	pcorr:0.0439132	MALT1_HUMANMucosa-associated lymphoid tissue lymphoma translocation protein 1 OS=Homo sapiens OX=9606 GN=MALT1 PE=1 SV=1	#N/A	TRINITY_DN18233_c0_g1_i9
520304	M:5	F:2	p:0.0439132	pcorr:0.0439132	MALT1_HUMANMucosa-associated lymphoid tissue lymphoma translocation protein 1 OS=Homo sapiens OX=9606 GN=MALT1 PE=1 SV=1	#N/A	TRINITY_DN18233_c0_g1_i5
520304	M:5	F:2	p:0.0439132	pcorr:0.0439132	MALT1_HUMANMucosa-associated lymphoid tissue lymphoma translocation protein 1 OS=Homo sapiens OX=9606 GN=MALT1 PE=1 SV=1	#N/A	TRINITY_DN18233_c0_g1_i12
520304	M:5	F:2	p:0.0439132	pcorr:0.0439132	MALT1_HUMANMucosa-associated lymphoid tissue lymphoma translocation protein 1 OS=Homo sapiens OX=9606 GN=MALT1 PE=1 SV=1	#N/A	TRINITY_DN18233_c0_g1_i13
520304	M:5	F:2	p:0.0439132	pcorr:0.0439132	MALT1_HUMANMucosa-associated lymphoid tissue lymphoma translocation protein 1 OS=Homo sapiens OX=9606 GN=MALT1 PE=1 SV=1	#N/A	TRINITY_DN18233_c0_g1_i4
522484	M:7	F:2	p:0.00159493	pcorr:0.00159493	TRIP4_HUMANActivating signal cointegrator 1 OS=Homo sapiens OX=9606 GN=TRIP4 PE=1 SV=4	Choren_v00_mik.OX359192.1G318.1	TRINITY_DN139_c0_g1_i11
522484	M:7	F:2	p:0.00159493	pcorr:0.00159493	TRIP4_HUMANActivating signal cointegrator 1 OS=Homo sapiens OX=9606 GN=TRIP4 PE=1 SV=4	Choren_v00_mik.OX359192.1G318.1	TRINITY_DN139_c0_g1_i1
522484	M:7	F:2	p:0.00159493	pcorr:0.00159493	TRIP4_HUMANActivating signal cointegrator 1 OS=Homo sapiens OX=9606 GN=TRIP4 PE=1 SV=4	Choren_v00_mik.OX359192.1G318.1	TRINITY_DN139_c0_g1_i13
522484	M:7	F:2	p:0.00159493	pcorr:0.00159493	TRIP4_HUMANActivating signal cointegrator 1 OS=Homo sapiens OX=9606 GN=TRIP4 PE=1 SV=4	Choren_v00_mik.OX359192.1G318.1	TRINITY_DN139_c0_g1_i9
522484	M:7	F:2	p:0.00159493	pcorr:0.00159493	TRIP4_HUMANActivating signal cointegrator 1 OS=Homo sapiens OX=9606 GN=TRIP4 PE=1 SV=4	Choren_v00_mik.OX359192.1G318.1	TRINITY_DN139_c0_g1_i15
530724	M:2	F:13	p:0.00290775	pcorr:0.00290775	GLCSF_BACTNN-acetylglucosamine-6-O-sulfatase OS=Bacteroides thetaiotaomicron (strain ATCC 29148 / DSM 2079 / JCM 5827 / CCUG 10774 / NCTC 10582 / VPI-5482 / E50) OX=226186 GN=BT_4656 PE=1 SV=1	Choren_v00_mik.OX359189.1G963.1	TRINITY_DN114766_c0_g1_i1
530724	M:2	F:13	p:0.00290775	pcorr:0.00290775	-	Choren_v00_mik.OX359189.1G963.1	TRINITY_DN114766_c0_g1_i2
553441	M:0	F:13	p:6.87148e-05	pcorr:6.87148e-05	PO21_NASVIRetrovirus-related Pol polyprotein from type-1 retrotransposable element R2 (Fragment) OS=Nasonia vitripennis OX=7425 PE=4 SV=2	Choren_v00_mik.OX359191.1G405.1	TRINITY_DN1825_c1_g1_i12
553441	M:0	F:13	p:6.87148e-05	pcorr:6.87148e-05	PO21_NASVIRetrovirus-related Pol polyprotein from type-1 retrotransposable element R2 (Fragment) OS=Nasonia vitripennis OX=7425 PE=4 SV=2	Choren_v00_mik.OX359191.1G405.1	TRINITY_DN1825_c1_g1_i4
553441	M:0	F:13	p:6.87148e-05	pcorr:6.87148e-05	PO21_NASVIRetrovirus-related Pol polyprotein from type-1 retrotransposable element R2 (Fragment) OS=Nasonia vitripennis OX=7425 PE=4 SV=2	Choren_v00_mik.OX359191.1G405.1	TRINITY_DN1825_c1_g1_i15
553441	M:0	F:13	p:6.87148e-05	pcorr:6.87148e-05	PO21_NASVIRetrovirus-related Pol polyprotein from type-1 retrotransposable element R2 (Fragment) OS=Nasonia vitripennis OX=7425 PE=4 SV=2	Choren_v00_mik.OX359191.1G405.1	TRINITY_DN1825_c1_g1_i6
553441	M:0	F:13	p:6.87148e-05	pcorr:6.87148e-05	-	Choren_v00_mik.OX359191.1G405.1	TRINITY_DN10660_c0_g1_i11
565686	M:2	F:11	p:0.0439132	pcorr:0.0439132	-	#N/A	TRINITY_DN45364_c0_g1_i1
565686	M:2	F:11	p:0.0439132	pcorr:0.0439132	-	#N/A	TRINITY_DN4387_c0_g1_i2
565686	M:2	F:11	p:0.0439132	pcorr:0.0439132	-	#N/A	TRINITY_DN4387_c0_g1_i1
565686	M:2	F:11	p:0.0439132	pcorr:0.0439132	-	#N/A	TRINITY_DN4387_c0_g1_i4
565686	M:2	F:11	p:0.0439132	pcorr:0.0439132	-	#N/A	TRINITY_DN4387_c0_g1_i3
574469	M:5	F:2	p:0.0439132	pcorr:0.0439132	PO21_NASVIRetrovirus-related Pol polyprotein from type-1 retrotransposable element R2 (Fragment) OS=Nasonia vitripennis OX=7425 PE=4 SV=2	Choren_v00_mik.OX359196.1G410.1	TRINITY_DN1825_c1_g1_i12
574469	M:5	F:2	p:0.0439132	pcorr:0.0439132	PO21_NASVIRetrovirus-related Pol polyprotein from type-1 retrotransposable element R2 (Fragment) OS=Nasonia vitripennis OX=7425 PE=4 SV=2	Choren_v00_mik.OX359196.1G410.1	TRINITY_DN1825_c1_g1_i4
574469	M:5	F:2	p:0.0439132	pcorr:0.0439132	PO21_NASVIRetrovirus-related Pol polyprotein from type-1 retrotransposable element R2 (Fragment) OS=Nasonia vitripennis OX=7425 PE=4 SV=2	Choren_v00_mik.OX359196.1G410.1	TRINITY_DN1825_c1_g1_i15
574469	M:5	F:2	p:0.0439132	pcorr:0.0439132	PO21_NASVIRetrovirus-related Pol polyprotein from type-1 retrotransposable element R2 (Fragment) OS=Nasonia vitripennis OX=7425 PE=4 SV=2	Choren_v00_mik.OX359196.1G410.1	TRINITY_DN1825_c1_g1_i6
574469	M:5	F:2	p:0.0439132	pcorr:0.0439132	-	Choren_v00_mik.OX359196.1G410.1	TRINITY_DN98110_c0_g3_i1
605006	M:4	F:0	p:0.0138458	pcorr:0.0138458	-	#N/A	TRINITY_DN4860_c0_g1_i14
605006	M:4	F:0	p:0.0138458	pcorr:0.0138458	-	#N/A	TRINITY_DN4860_c0_g1_i2
605006	M:4	F:0	p:0.0138458	pcorr:0.0138458	-	#N/A	TRINITY_DN4860_c0_g1_i1
605006	M:4	F:0	p:0.0138458	pcorr:0.0138458	-	#N/A	TRINITY_DN9383_c0_g1_i8
605006	M:4	F:0	p:0.0138458	pcorr:0.0138458	-	#N/A	TRINITY_DN45145_c0_g1_i10
607515	M:0	F:13	p:6.87148e-05	pcorr:6.87148e-05	-	Choren_v00_mik.OX359192.1G235.1	TRINITY_DN127673_c0_g2_i1
607515	M:0	F:13	p:6.87148e-05	pcorr:6.87148e-05	-	Choren_v00_mik.OX359192.1G235.1	TRINITY_DN71646_c0_g2_i1
607515	M:0	F:13	p:6.87148e-05	pcorr:6.87148e-05	-	Choren_v00_mik.OX359192.1G235.1	TRINITY_DN19107_c2_g1_i1
607515	M:0	F:13	p:6.87148e-05	pcorr:6.87148e-05	-	Choren_v00_mik.OX359192.1G235.1	TRINITY_DN2928_c2_g1_i1
607515	M:0	F:13	p:6.87148e-05	pcorr:6.87148e-05	-	Choren_v00_mik.OX359192.1G235.1	TRINITY_DN63597_c0_g1_i8
613265	M:7	F:5	p:0.0277373	pcorr:0.0277373	-	#N/A	TRINITY_DN223821_c0_g1_i1
613265	M:7	F:5	p:0.0277373	pcorr:0.0277373	-	#N/A	TRINITY_DN180128_c0_g1_i1
613604	M:5	F:2	p:0.0439132	pcorr:0.0439132	-	#N/A	TRINITY_DN235404_c0_g1_i1
622531	M:5	F:2	p:0.0439132	pcorr:0.0439132	-	#N/A	TRINITY_DN39030_c0_g3_i1
622531	M:5	F:2	p:0.0439132	pcorr:0.0439132	-	#N/A	TRINITY_DN79095_c0_g1_i2
622531	M:5	F:2	p:0.0439132	pcorr:0.0439132	-	#N/A	TRINITY_DN7500_c1_g2_i1
622531	M:5	F:2	p:0.0439132	pcorr:0.0439132	-	#N/A	TRINITY_DN30782_c0_g1_i1
622531	M:5	F:2	p:0.0439132	pcorr:0.0439132	-	#N/A	TRINITY_DN3715_c0_g1_i21
635046	M:0	F:13	p:6.87148e-05	pcorr:6.87148e-05	-	Choren_v00_mik.OX359192.1G511.1	TRINITY_DN1162_c0_g1_i5
635046	M:0	F:13	p:6.87148e-05	pcorr:6.87148e-05	-	Choren_v00_mik.OX359192.1G511.1	TRINITY_DN1162_c0_g1_i9
635046	M:0	F:13	p:6.87148e-05	pcorr:6.87148e-05	-	Choren_v00_mik.OX359192.1G511.1	TRINITY_DN41078_c0_g1_i1
641142	M:7	F:5	p:0.0277373	pcorr:0.0277373	-	#N/A	TRINITY_DN26735_c0_g1_i1
641142	M:7	F:5	p:0.0277373	pcorr:0.0277373	RBM39_HUMANRNA-binding protein 39 OS=Homo sapiens OX=9606 GN=RBM39 PE=1 SV=2	#N/A	TRINITY_DN2048_c2_g1_i1
641142	M:7	F:5	p:0.0277373	pcorr:0.0277373	-	#N/A	TRINITY_DN15232_c0_g1_i2
641142	M:7	F:5	p:0.0277373	pcorr:0.0277373	-	#N/A	TRINITY_DN35119_c0_g2_i1
641142	M:7	F:5	p:0.0277373	pcorr:0.0277373	-	#N/A	TRINITY_DN25220_c0_g1_i2
642307	M:0	F:10	p:0.00491056	pcorr:0.00491056	-	#N/A	TRINITY_DN30036_c0_g1_i2
646268	M:4	F:0	p:0.0138458	pcorr:0.0138458	-	#N/A	TRINITY_DN72919_c0_g1_i5
651032	M:5	F:2	p:0.0439132	pcorr:0.0439132	IP6K3_MOUSEInositol hexakisphosphate kinase 3 OS=Mus musculus OX=10090 GN=Ip6k3 PE=2 SV=1	Choren_v00_mik.OX359199.1G240.1	TRINITY_DN4855_c0_g1_i1
651032	M:5	F:2	p:0.0439132	pcorr:0.0439132	IP6K3_MOUSEInositol hexakisphosphate kinase 3 OS=Mus musculus OX=10090 GN=Ip6k3 PE=2 SV=1	Choren_v00_mik.OX359199.1G240.1	TRINITY_DN4855_c0_g1_i8
651032	M:5	F:2	p:0.0439132	pcorr:0.0439132	IP6K3_MOUSEInositol hexakisphosphate kinase 3 OS=Mus musculus OX=10090 GN=Ip6k3 PE=2 SV=1	Choren_v00_mik.OX359199.1G240.1	TRINITY_DN4855_c0_g1_i6
651032	M:5	F:2	p:0.0439132	pcorr:0.0439132	IP6K3_MOUSEInositol hexakisphosphate kinase 3 OS=Mus musculus OX=10090 GN=Ip6k3 PE=2 SV=1	Choren_v00_mik.OX359199.1G240.1	TRINITY_DN4855_c0_g1_i7
651032	M:5	F:2	p:0.0439132	pcorr:0.0439132	IP6K3_MOUSEInositol hexakisphosphate kinase 3 OS=Mus musculus OX=10090 GN=Ip6k3 PE=2 SV=1	Choren_v00_mik.OX359199.1G240.1	TRINITY_DN4855_c0_g1_i4
655064	M:5	F:2	p:0.0439132	pcorr:0.0439132	-	#N/A	TRINITY_DN65_c0_g1_i8
655064	M:5	F:2	p:0.0439132	pcorr:0.0439132	-	#N/A	TRINITY_DN65_c0_g1_i3
655064	M:5	F:2	p:0.0439132	pcorr:0.0439132	-	#N/A	TRINITY_DN65_c0_g1_i4
655064	M:5	F:2	p:0.0439132	pcorr:0.0439132	-	#N/A	TRINITY_DN65_c0_g1_i2
655064	M:5	F:2	p:0.0439132	pcorr:0.0439132	-	#N/A	TRINITY_DN2449_c0_g1_i8
657036	M:6	F:3	p:0.0267948	pcorr:0.0267948	P2R3A_HUMANSerine/threonine-protein phosphatase 2A regulatory subunit B'' subunit alpha OS=Homo sapiens OX=9606 GN=PPP2R3A PE=1 SV=1	#N/A	TRINITY_DN988_c0_g1_i1
657036	M:6	F:3	p:0.0267948	pcorr:0.0267948	P2R3B_HUMANSerine/threonine-protein phosphatase 2A regulatory subunit B'' subunit beta OS=Homo sapiens OX=9606 GN=PPP2R3B PE=1 SV=2	#N/A	TRINITY_DN988_c0_g1_i3
657036	M:6	F:3	p:0.0267948	pcorr:0.0267948	P2R3A_HUMANSerine/threonine-protein phosphatase 2A regulatory subunit B'' subunit alpha OS=Homo sapiens OX=9606 GN=PPP2R3A PE=1 SV=1	#N/A	TRINITY_DN988_c0_g1_i2
661923	M:0	F:8	p:0.0277373	pcorr:0.0277373	-	#N/A	TRINITY_DN50615_c0_g1_i4
661923	M:0	F:8	p:0.0277373	pcorr:0.0277373	-	#N/A	TRINITY_DN50615_c0_g1_i3
661923	M:0	F:8	p:0.0277373	pcorr:0.0277373	-	#N/A	TRINITY_DN50615_c0_g1_i2
661923	M:0	F:8	p:0.0277373	pcorr:0.0277373	-	#N/A	TRINITY_DN50615_c0_g1_i1
661923	M:0	F:8	p:0.0277373	pcorr:0.0277373	-	#N/A	TRINITY_DN50615_c0_g1_i1
674943	M:0	F:13	p:6.87148e-05	pcorr:6.87148e-05	PO21_NASVIRetrovirus-related Pol polyprotein from type-1 retrotransposable element R2 (Fragment) OS=Nasonia vitripennis OX=7425 PE=4 SV=2	Choren_v00_mik.OX359192.1G520.1	TRINITY_DN1825_c1_g1_i12
674943	M:0	F:13	p:6.87148e-05	pcorr:6.87148e-05	PO21_NASVIRetrovirus-related Pol polyprotein from type-1 retrotransposable element R2 (Fragment) OS=Nasonia vitripennis OX=7425 PE=4 SV=2	Choren_v00_mik.OX359192.1G520.1	TRINITY_DN1825_c1_g1_i4
674943	M:0	F:13	p:6.87148e-05	pcorr:6.87148e-05	PO21_NASVIRetrovirus-related Pol polyprotein from type-1 retrotransposable element R2 (Fragment) OS=Nasonia vitripennis OX=7425 PE=4 SV=2	Choren_v00_mik.OX359192.1G520.1	TRINITY_DN1825_c1_g1_i15
674943	M:0	F:13	p:6.87148e-05	pcorr:6.87148e-05	PO21_NASVIRetrovirus-related Pol polyprotein from type-1 retrotransposable element R2 (Fragment) OS=Nasonia vitripennis OX=7425 PE=4 SV=2	Choren_v00_mik.OX359192.1G520.1	TRINITY_DN1825_c1_g1_i6
674943	M:0	F:13	p:6.87148e-05	pcorr:6.87148e-05	-	Choren_v00_mik.OX359192.1G520.1	TRINITY_DN98110_c0_g3_i1
674968	M:0	F:8	p:0.0277373	pcorr:0.0277373	P2OX_LYOSHPyranose 2-oxidase OS=Lyophyllum shimeji OX=47721 GN=p2ox PE=2 SV=1	#N/A	TRINITY_DN251_c0_g2_i10
674968	M:0	F:8	p:0.0277373	pcorr:0.0277373	PCGF1_DANREPolycomb group RING finger protein 1 OS=Danio rerio OX=7955 GN=pcgf1 PE=3 SV=1	#N/A	TRINITY_DN251_c0_g1_i12
674968	M:0	F:8	p:0.0277373	pcorr:0.0277373	-	#N/A	TRINITY_DN56408_c0_g1_i1
680144	M:7	F:5	p:0.0277373	pcorr:0.0277373	CERT_BOVINCeramide transfer protein OS=Bos taurus OX=9913 GN=CERT1 PE=2 SV=1	#N/A	TRINITY_DN1306_c0_g1_i9
680144	M:7	F:5	p:0.0277373	pcorr:0.0277373	CERT_BOVINCeramide transfer protein OS=Bos taurus OX=9913 GN=CERT1 PE=2 SV=1	#N/A	TRINITY_DN1306_c0_g1_i7
680144	M:7	F:5	p:0.0277373	pcorr:0.0277373	CERT_XENTRCeramide transfer protein OS=Xenopus tropicalis OX=8364 GN=cert1 PE=2 SV=1	#N/A	TRINITY_DN1306_c0_g1_i3
680144	M:7	F:5	p:0.0277373	pcorr:0.0277373	CERT_BOVINCeramide transfer protein OS=Bos taurus OX=9913 GN=CERT1 PE=2 SV=1	#N/A	TRINITY_DN1306_c0_g1_i1
680144	M:7	F:5	p:0.0277373	pcorr:0.0277373	CERT_XENTRCeramide transfer protein OS=Xenopus tropicalis OX=8364 GN=cert1 PE=2 SV=1	#N/A	TRINITY_DN1306_c0_g1_i8
701247	M:4	F:0	p:0.0138458	pcorr:0.0138458	-	#N/A	TRINITY_DN187436_c0_g1_i1
701247	M:4	F:0	p:0.0138458	pcorr:0.0138458	-	#N/A	TRINITY_DN50085_c0_g1_i2
701247	M:4	F:0	p:0.0138458	pcorr:0.0138458	-	#N/A	TRINITY_DN50085_c0_g1_i1
701247	M:4	F:0	p:0.0138458	pcorr:0.0138458	-	#N/A	TRINITY_DN13926_c0_g2_i2
701247	M:4	F:0	p:0.0138458	pcorr:0.0138458	-	#N/A	TRINITY_DN1035_c0_g1_i3
707481	M:7	F:5	p:0.0277373	pcorr:0.0277373	-	Choren_v00_mik.OX359192.1G235.1	TRINITY_DN2928_c2_g1_i1
707481	M:7	F:5	p:0.0277373	pcorr:0.0277373	-	Choren_v00_mik.OX359192.1G235.1	TRINITY_DN2928_c2_g1_i3
707481	M:7	F:5	p:0.0277373	pcorr:0.0277373	-	Choren_v00_mik.OX359192.1G235.1	TRINITY_DN2928_c2_g1_i2
707481	M:7	F:5	p:0.0277373	pcorr:0.0277373	SLX1_MOUSEStructure-specific endonuclease subunit SLX1 OS=Mus musculus OX=10090 GN=Slx1b PE=2 SV=1	Choren_v00_mik.OX359192.1G235.1	TRINITY_DN29139_c0_g1_i2
707481	M:7	F:5	p:0.0277373	pcorr:0.0277373	SLX1_XENLAStructure-specific endonuclease subunit slx1 OS=Xenopus laevis OX=8355 GN=slx1a PE=2 SV=1	Choren_v00_mik.OX359192.1G235.1	TRINITY_DN29139_c0_g1_i3
718196	M:0	F:12	p:0.000399051	pcorr:0.000399051	-	#N/A	TRINITY_DN2298_c0_g1_i1
718196	M:0	F:12	p:0.000399051	pcorr:0.000399051	-	#N/A	TRINITY_DN2298_c0_g1_i11
718196	M:0	F:12	p:0.000399051	pcorr:0.000399051	-	#N/A	TRINITY_DN2298_c0_g1_i5
718196	M:0	F:12	p:0.000399051	pcorr:0.000399051	-	#N/A	TRINITY_DN2298_c0_g1_i14
718196	M:0	F:12	p:0.000399051	pcorr:0.000399051	-	#N/A	TRINITY_DN2298_c0_g1_i9
718426	M:4	F:0	p:0.0138458	pcorr:0.0138458	ARK1_CAEELAck-related non-receptor tyrosine kinase OS=Caenorhabditis elegans OX=6239 GN=ark-1 PE=2 SV=1	#N/A	TRINITY_DN1245_c0_g1_i19
718426	M:4	F:0	p:0.0138458	pcorr:0.0138458	ABL1_MOUSETyrosine-protein kinase ABL1 OS=Mus musculus OX=10090 GN=Abl1 PE=1 SV=3	#N/A	TRINITY_DN1245_c0_g1_i22
718426	M:4	F:0	p:0.0138458	pcorr:0.0138458	ABL1_MOUSETyrosine-protein kinase ABL1 OS=Mus musculus OX=10090 GN=Abl1 PE=1 SV=3	#N/A	TRINITY_DN1245_c0_g1_i1
718426	M:4	F:0	p:0.0138458	pcorr:0.0138458	-	#N/A	TRINITY_DN1245_c0_g1_i14
718426	M:4	F:0	p:0.0138458	pcorr:0.0138458	ABL1_MOUSETyrosine-protein kinase ABL1 OS=Mus musculus OX=10090 GN=Abl1 PE=1 SV=3	#N/A	TRINITY_DN1245_c0_g1_i13
724556	M:5	F:0	p:0.00290775	pcorr:0.00290775	SOAT1_RATSterol O-acyltransferase 1 OS=Rattus norvegicus OX=10116 GN=Soat1 PE=2 SV=1	Choren_v00_mik.OX359199.1G315.1	TRINITY_DN3083_c0_g1_i10
724556	M:5	F:0	p:0.00290775	pcorr:0.00290775	SOAT1_MOUSESterol O-acyltransferase 1 OS=Mus musculus OX=10090 GN=Soat1 PE=1 SV=2	Choren_v00_mik.OX359199.1G315.1	TRINITY_DN3083_c0_g1_i7
728215	M:5	F:1	p:0.0140786	pcorr:0.0140786	-	Choren_v00_mik.OX359191.1G489.1	TRINITY_DN9070_c0_g1_i11
728215	M:5	F:1	p:0.0140786	pcorr:0.0140786	-	Choren_v00_mik.OX359191.1G489.1	TRINITY_DN9070_c0_g1_i6
733160	M:1	F:10	p:0.0267948	pcorr:0.0267948	MP2K2_XENLADual specificity mitogen-activated protein kinase kinase 2 (Fragment) OS=Xenopus laevis OX=8355 GN=map2k2 PE=1 SV=1	Choren_v00_mik.OX359192.1G988.1	TRINITY_DN6012_c0_g1_i26
733160	M:1	F:10	p:0.0267948	pcorr:0.0267948	COX11_HUMANCytochrome c oxidase assembly protein COX11, mitochondrial OS=Homo sapiens OX=9606 GN=COX11 PE=1 SV=3	Choren_v00_mik.OX359192.1G988.1	TRINITY_DN6012_c0_g1_i12
733160	M:1	F:10	p:0.0267948	pcorr:0.0267948	RN157_XENLAE3 ubiquitin ligase Rnf157 OS=Xenopus laevis OX=8355 GN=rnf157 PE=2 SV=1	Choren_v00_mik.OX359192.1G988.1	TRINITY_DN6012_c0_g1_i19
733160	M:1	F:10	p:0.0267948	pcorr:0.0267948	COX11_HUMANCytochrome c oxidase assembly protein COX11, mitochondrial OS=Homo sapiens OX=9606 GN=COX11 PE=1 SV=3	Choren_v00_mik.OX359192.1G988.1	TRINITY_DN6012_c0_g1_i31
733160	M:1	F:10	p:0.0267948	pcorr:0.0267948	COX11_HUMANCytochrome c oxidase assembly protein COX11, mitochondrial OS=Homo sapiens OX=9606 GN=COX11 PE=1 SV=3	Choren_v00_mik.OX359192.1G988.1	TRINITY_DN6012_c0_g1_i17
757250	M:0	F:10	p:0.00491056	pcorr:0.00491056	-	#N/A	TRINITY_DN8548_c0_g1_i2
757250	M:0	F:10	p:0.00491056	pcorr:0.00491056	-	#N/A	TRINITY_DN8548_c0_g1_i3
757250	M:0	F:10	p:0.00491056	pcorr:0.00491056	-	#N/A	TRINITY_DN81188_c0_g1_i2
757250	M:0	F:10	p:0.00491056	pcorr:0.00491056	-	#N/A	TRINITY_DN34511_c1_g1_i3
757250	M:0	F:10	p:0.00491056	pcorr:0.00491056	-	#N/A	TRINITY_DN34511_c1_g1_i4
758030	M:6	F:3	p:0.0267948	pcorr:0.0267948	-	#N/A	TRINITY_DN6567_c1_g1_i6
758030	M:6	F:3	p:0.0267948	pcorr:0.0267948	-	#N/A	TRINITY_DN6567_c1_g1_i8
758030	M:6	F:3	p:0.0267948	pcorr:0.0267948	-	#N/A	TRINITY_DN6567_c1_g1_i2
758030	M:6	F:3	p:0.0267948	pcorr:0.0267948	-	#N/A	TRINITY_DN6567_c1_g1_i7
758030	M:6	F:3	p:0.0267948	pcorr:0.0267948	-	#N/A	TRINITY_DN88478_c0_g1_i1
765067	M:0	F:11	p:0.00159493	pcorr:0.00159493	-	#N/A	TRINITY_DN2298_c0_g1_i1
765067	M:0	F:11	p:0.00159493	pcorr:0.00159493	-	#N/A	TRINITY_DN2298_c0_g1_i11
765067	M:0	F:11	p:0.00159493	pcorr:0.00159493	-	#N/A	TRINITY_DN2298_c0_g1_i5
765067	M:0	F:11	p:0.00159493	pcorr:0.00159493	-	#N/A	TRINITY_DN2298_c0_g1_i14
765067	M:0	F:11	p:0.00159493	pcorr:0.00159493	-	#N/A	TRINITY_DN2298_c0_g1_i9
767982	M:4	F:0	p:0.0138458	pcorr:0.0138458	-	#N/A	TRINITY_DN18663_c0_g1_i2
767982	M:4	F:0	p:0.0138458	pcorr:0.0138458	-	#N/A	TRINITY_DN18663_c0_g1_i1
767997	M:5	F:1	p:0.0140786	pcorr:0.0140786	-	Choren_v00_mik.OX359193.1G728.1	TRINITY_DN51879_c0_g2_i1
767997	M:5	F:1	p:0.0140786	pcorr:0.0140786	VPS53_PONABVacuolar protein sorting-associated protein 53 homolog OS=Pongo abelii OX=9601 GN=VPS53 PE=2 SV=2	Choren_v00_mik.OX359193.1G728.1	TRINITY_DN874_c0_g1_i14
767997	M:5	F:1	p:0.0140786	pcorr:0.0140786	VPS53_CHICKVacuolar protein sorting-associated protein 53 homolog OS=Gallus gallus OX=9031 GN=VPS53 PE=2 SV=1	Choren_v00_mik.OX359193.1G728.1	TRINITY_DN874_c0_g1_i1
767997	M:5	F:1	p:0.0140786	pcorr:0.0140786	VPS53_CHICKVacuolar protein sorting-associated protein 53 homolog OS=Gallus gallus OX=9031 GN=VPS53 PE=2 SV=1	Choren_v00_mik.OX359193.1G728.1	TRINITY_DN874_c0_g1_i12
767997	M:5	F:1	p:0.0140786	pcorr:0.0140786	HIP1_MOUSEHuntingtin-interacting protein 1 OS=Mus musculus OX=10090 GN=Hip1 PE=1 SV=2	Choren_v00_mik.OX359193.1G728.1	TRINITY_DN874_c0_g1_i9
770573	M:0	F:13	p:6.87148e-05	pcorr:6.87148e-05	-	Choren_v00_mik.OX359198.1G487.1	TRINITY_DN86408_c0_g1_i1
770573	M:0	F:13	p:6.87148e-05	pcorr:6.87148e-05	-	Choren_v00_mik.OX359198.1G487.1	TRINITY_DN86408_c0_g1_i5
770573	M:0	F:13	p:6.87148e-05	pcorr:6.87148e-05	-	Choren_v00_mik.OX359198.1G487.1	TRINITY_DN86408_c0_g1_i3
770573	M:0	F:13	p:6.87148e-05	pcorr:6.87148e-05	-	Choren_v00_mik.OX359198.1G487.1	TRINITY_DN86408_c0_g1_i4
770573	M:0	F:13	p:6.87148e-05	pcorr:6.87148e-05	-	Choren_v00_mik.OX359198.1G487.1	TRINITY_DN86408_c0_g1_i2
776177	M:4	F:0	p:0.0138458	pcorr:0.0138458	-	#N/A	TRINITY_DN139839_c0_g1_i1
776261	M:5	F:2	p:0.0439132	pcorr:0.0439132	-	#N/A	TRINITY_DN2788_c0_g3_i1
776261	M:5	F:2	p:0.0439132	pcorr:0.0439132	-	#N/A	TRINITY_DN167828_c0_g1_i1
777995	M:0	F:8	p:0.0277373	pcorr:0.0277373	CHEC_CHAGBChaetoglobosin A biosynthesis cluster protein C OS=Chaetomium globosum (strain ATCC 6205 / CBS 148.51 / DSM 1962 / NBRC 6347 / NRRL 1970) OX=306901 GN=cheC PE=2 SV=1	Choren_v00_mik.OX359198.1G181.1	TRINITY_DN22572_c0_g4_i4
777995	M:0	F:8	p:0.0277373	pcorr:0.0277373	CHEC_CHAGBChaetoglobosin A biosynthesis cluster protein C OS=Chaetomium globosum (strain ATCC 6205 / CBS 148.51 / DSM 1962 / NBRC 6347 / NRRL 1970) OX=306901 GN=cheC PE=2 SV=1	Choren_v00_mik.OX359198.1G181.1	TRINITY_DN22572_c0_g4_i3
777995	M:0	F:8	p:0.0277373	pcorr:0.0277373	CHEC_CHAGBChaetoglobosin A biosynthesis cluster protein C OS=Chaetomium globosum (strain ATCC 6205 / CBS 148.51 / DSM 1962 / NBRC 6347 / NRRL 1970) OX=306901 GN=cheC PE=2 SV=1	Choren_v00_mik.OX359198.1G181.1	TRINITY_DN22572_c0_g4_i2
777995	M:0	F:8	p:0.0277373	pcorr:0.0277373	CHEC_CHAGBChaetoglobosin A biosynthesis cluster protein C OS=Chaetomium globosum (strain ATCC 6205 / CBS 148.51 / DSM 1962 / NBRC 6347 / NRRL 1970) OX=306901 GN=cheC PE=2 SV=1	Choren_v00_mik.OX359198.1G181.1	TRINITY_DN22572_c0_g4_i1
779918	M:0	F:13	p:6.87148e-05	pcorr:6.87148e-05	-	#N/A	TRINITY_DN37990_c0_g1_i1
779918	M:0	F:13	p:6.87148e-05	pcorr:6.87148e-05	-	#N/A	TRINITY_DN1829_c2_g1_i8
779918	M:0	F:13	p:6.87148e-05	pcorr:6.87148e-05	-	#N/A	TRINITY_DN37990_c0_g1_i4
779918	M:0	F:13	p:6.87148e-05	pcorr:6.87148e-05	-	#N/A	TRINITY_DN78040_c1_g4_i2
779918	M:0	F:13	p:6.87148e-05	pcorr:6.87148e-05	-	#N/A	TRINITY_DN1829_c2_g1_i14
783140	M:0	F:8	p:0.0277373	pcorr:0.0277373	-	Choren_v00_mik.OX359192.1G235.1	TRINITY_DN9254_c0_g2_i4
783140	M:0	F:8	p:0.0277373	pcorr:0.0277373	-	Choren_v00_mik.OX359192.1G235.1	TRINITY_DN9254_c0_g2_i10
783140	M:0	F:8	p:0.0277373	pcorr:0.0277373	PIGM_CHICKGPI mannosyltransferase 1 OS=Gallus gallus OX=9031 GN=PIGM PE=2 SV=2	Choren_v00_mik.OX359192.1G235.1	TRINITY_DN16912_c0_g1_i4
783140	M:0	F:8	p:0.0277373	pcorr:0.0277373	PIGM_XENTRGPI mannosyltransferase 1 OS=Xenopus tropicalis OX=8364 GN=pigm PE=2 SV=1	Choren_v00_mik.OX359192.1G235.1	TRINITY_DN16912_c0_g1_i5
783140	M:0	F:8	p:0.0277373	pcorr:0.0277373	PTPRT_HUMANReceptor-type tyrosine-protein phosphatase T OS=Homo sapiens OX=9606 GN=PTPRT PE=1 SV=6	Choren_v00_mik.OX359192.1G235.1	TRINITY_DN1562_c0_g1_i16
785572	M:5	F:1	p:0.0140786	pcorr:0.0140786	SUBV_BACSUMinor extracellular protease vpr OS=Bacillus subtilis (strain 168) OX=224308 GN=vpr PE=1 SV=1	#N/A	TRINITY_DN61279_c0_g1_i10
785572	M:5	F:1	p:0.0140786	pcorr:0.0140786	-	#N/A	TRINITY_DN61279_c0_g1_i6
785957	M:5	F:2	p:0.0439132	pcorr:0.0439132	RFC4_MOUSEReplication factor C subunit 4 OS=Mus musculus OX=10090 GN=Rfc4 PE=1 SV=1	#N/A	TRINITY_DN2375_c0_g1_i12
785957	M:5	F:2	p:0.0439132	pcorr:0.0439132	FAT4_MOUSEProtocadherin Fat 4 OS=Mus musculus OX=10090 GN=Fat4 PE=1 SV=2	#N/A	TRINITY_DN2375_c0_g1_i22
785957	M:5	F:2	p:0.0439132	pcorr:0.0439132	FAT4_MOUSEProtocadherin Fat 4 OS=Mus musculus OX=10090 GN=Fat4 PE=1 SV=2	#N/A	TRINITY_DN2375_c0_g1_i11
785957	M:5	F:2	p:0.0439132	pcorr:0.0439132	FAT4_MOUSEProtocadherin Fat 4 OS=Mus musculus OX=10090 GN=Fat4 PE=1 SV=2	#N/A	TRINITY_DN2375_c0_g1_i9
785957	M:5	F:2	p:0.0439132	pcorr:0.0439132	FAT4_MOUSEProtocadherin Fat 4 OS=Mus musculus OX=10090 GN=Fat4 PE=1 SV=2	#N/A	TRINITY_DN2375_c0_g1_i17
790114	M:6	F:2	p:0.00977293	pcorr:0.00977293	GPTC3_MOUSEG patch domain-containing protein 3 OS=Mus musculus OX=10090 GN=Gpatch3 PE=2 SV=1	#N/A	TRINITY_DN946_c0_g1_i19
790114	M:6	F:2	p:0.00977293	pcorr:0.00977293	GPTC3_MOUSEG patch domain-containing protein 3 OS=Mus musculus OX=10090 GN=Gpatch3 PE=2 SV=1	#N/A	TRINITY_DN946_c0_g1_i37
790114	M:6	F:2	p:0.00977293	pcorr:0.00977293	GPTC3_MOUSEG patch domain-containing protein 3 OS=Mus musculus OX=10090 GN=Gpatch3 PE=2 SV=1	#N/A	TRINITY_DN946_c0_g1_i28
790114	M:6	F:2	p:0.00977293	pcorr:0.00977293	NCLX_CHICKMitochondrial sodium/calcium exchanger protein OS=Gallus gallus OX=9031 GN=SLC8B1 PE=3 SV=4	#N/A	TRINITY_DN946_c0_g1_i17
790114	M:6	F:2	p:0.00977293	pcorr:0.00977293	NCLX_CHICKMitochondrial sodium/calcium exchanger protein OS=Gallus gallus OX=9031 GN=SLC8B1 PE=3 SV=4	#N/A	TRINITY_DN946_c0_g1_i11
847620	M:7	F:4	p:0.012518	pcorr:0.012518	-	#N/A	TRINITY_DN32386_c0_g1_i1
850216	M:4	F:0	p:0.0138458	pcorr:0.0138458	-	Choren_v00_mik.OX359196.1G230.1	TRINITY_DN12472_c2_g1_i2
850216	M:4	F:0	p:0.0138458	pcorr:0.0138458	-	Choren_v00_mik.OX359196.1G230.1	TRINITY_DN12472_c2_g1_i1
850216	M:4	F:0	p:0.0138458	pcorr:0.0138458	-	Choren_v00_mik.OX359196.1G230.1	TRINITY_DN84846_c0_g1_i1
850216	M:4	F:0	p:0.0138458	pcorr:0.0138458	-	Choren_v00_mik.OX359196.1G230.1	TRINITY_DN84846_c0_g1_i1
850216	M:4	F:0	p:0.0138458	pcorr:0.0138458	-	Choren_v00_mik.OX359196.1G230.1	TRINITY_DN84846_c0_g1_i1
850216	M:4	F:0	p:0.0138458	pcorr:0.0138458	-	Choren_v00_mik.OX359196.1G230.1	TRINITY_DN9260_c0_g2_i1
850216	M:4	F:0	p:0.0138458	pcorr:0.0138458	-	Choren_v00_mik.OX359196.1G230.1	TRINITY_DN9260_c0_g2_i3
851441	M:4	F:0	p:0.0138458	pcorr:0.0138458	-	#N/A	TRINITY_DN34960_c1_g1_i1
851441	M:4	F:0	p:0.0138458	pcorr:0.0138458	HAUS7_HUMANHAUS augmin-like complex subunit 7 OS=Homo sapiens OX=9606 GN=HAUS7 PE=1 SV=4	#N/A	TRINITY_DN647_c3_g1_i5
851441	M:4	F:0	p:0.0138458	pcorr:0.0138458	-	#N/A	TRINITY_DN647_c3_g1_i1
851441	M:4	F:0	p:0.0138458	pcorr:0.0138458	-	#N/A	TRINITY_DN8181_c1_g1_i1
851441	M:4	F:0	p:0.0138458	pcorr:0.0138458	-	#N/A	TRINITY_DN78260_c0_g1_i2
867909	M:0	F:9	p:0.012518	pcorr:0.012518	-	Choren_v00_mik.OX359192.1G235.1	TRINITY_DN8482_c0_g2_i2
867909	M:0	F:9	p:0.012518	pcorr:0.012518	-	Choren_v00_mik.OX359192.1G235.1	TRINITY_DN10360_c0_g2_i4
867909	M:0	F:9	p:0.012518	pcorr:0.012518	-	Choren_v00_mik.OX359192.1G235.1	TRINITY_DN10360_c0_g2_i1
867909	M:0	F:9	p:0.012518	pcorr:0.012518	-	Choren_v00_mik.OX359192.1G235.1	TRINITY_DN52948_c0_g2_i2
867909	M:0	F:9	p:0.012518	pcorr:0.012518	-	Choren_v00_mik.OX359192.1G235.1	TRINITY_DN5364_c0_g1_i14
879193	M:5	F:2	p:0.0439132	pcorr:0.0439132	-	Choren_v00_mik.OX359200.1G113.2	TRINITY_DN2705_c0_g2_i13
879193	M:5	F:2	p:0.0439132	pcorr:0.0439132	-	Choren_v00_mik.OX359200.1G113.2	TRINITY_DN2705_c0_g2_i10
879193	M:5	F:2	p:0.0439132	pcorr:0.0439132	-	Choren_v00_mik.OX359200.1G113.2	TRINITY_DN2705_c0_g2_i6
879193	M:5	F:2	p:0.0439132	pcorr:0.0439132	-	Choren_v00_mik.OX359200.1G113.2	TRINITY_DN2705_c0_g2_i14
879193	M:5	F:2	p:0.0439132	pcorr:0.0439132	-	Choren_v00_mik.OX359200.1G113.2	TRINITY_DN2705_c0_g2_i5
881619	M:0	F:13	p:6.87148e-05	pcorr:6.87148e-05	-	#N/A	TRINITY_DN133883_c0_g1_i1
881619	M:0	F:13	p:6.87148e-05	pcorr:6.87148e-05	-	#N/A	TRINITY_DN133883_c0_g3_i1
881619	M:0	F:13	p:6.87148e-05	pcorr:6.87148e-05	-	#N/A	TRINITY_DN9463_c0_g2_i1
881619	M:0	F:13	p:6.87148e-05	pcorr:6.87148e-05	-	#N/A	TRINITY_DN9463_c0_g2_i2
881619	M:0	F:13	p:6.87148e-05	pcorr:6.87148e-05	-	#N/A	TRINITY_DN69524_c0_g1_i4
900067	M:6	F:1	p:0.00271931	pcorr:0.00271931	-	Choren_v00_mik.OX359201.1G394.1	TRINITY_DN4978_c0_g1_i16
900067	M:6	F:1	p:0.00271931	pcorr:0.00271931	-	Choren_v00_mik.OX359201.1G394.1	TRINITY_DN33683_c0_g1_i10
900067	M:6	F:1	p:0.00271931	pcorr:0.00271931	-	Choren_v00_mik.OX359201.1G394.1	TRINITY_DN33683_c0_g1_i7
900067	M:6	F:1	p:0.00271931	pcorr:0.00271931	-	Choren_v00_mik.OX359201.1G394.1	TRINITY_DN18012_c0_g1_i4
900067	M:6	F:1	p:0.00271931	pcorr:0.00271931	-	Choren_v00_mik.OX359201.1G394.1	TRINITY_DN18012_c0_g1_i2
903315	M:5	F:1	p:0.0140786	pcorr:0.0140786	-	#N/A	TRINITY_DN829_c5_g1_i1
903315	M:5	F:1	p:0.0140786	pcorr:0.0140786	-	#N/A	TRINITY_DN7078_c1_g1_i2
903315	M:5	F:1	p:0.0140786	pcorr:0.0140786	-	#N/A	TRINITY_DN7078_c1_g1_i1
903315	M:5	F:1	p:0.0140786	pcorr:0.0140786	-	#N/A	TRINITY_DN2048_c0_g1_i10
903315	M:5	F:1	p:0.0140786	pcorr:0.0140786	-	#N/A	TRINITY_DN35480_c0_g1_i2
909235	M:5	F:1	p:0.0140786	pcorr:0.0140786	ATPI1_ACTTEActinia tenebrosa protease inhibitors OS=Actinia tenebrosa OX=6105 PE=1 SV=1	#N/A	TRINITY_DN94_c0_g1_i19
909235	M:5	F:1	p:0.0140786	pcorr:0.0140786	ATPI1_ACTTEActinia tenebrosa protease inhibitors OS=Actinia tenebrosa OX=6105 PE=1 SV=1	#N/A	TRINITY_DN94_c0_g1_i3
909235	M:5	F:1	p:0.0140786	pcorr:0.0140786	ATPI1_ACTTEActinia tenebrosa protease inhibitors OS=Actinia tenebrosa OX=6105 PE=1 SV=1	#N/A	TRINITY_DN94_c0_g1_i21
909235	M:5	F:1	p:0.0140786	pcorr:0.0140786	ATPI1_ACTTEActinia tenebrosa protease inhibitors OS=Actinia tenebrosa OX=6105 PE=1 SV=1	#N/A	TRINITY_DN94_c0_g1_i11
909235	M:5	F:1	p:0.0140786	pcorr:0.0140786	ATPI1_ACTTEActinia tenebrosa protease inhibitors OS=Actinia tenebrosa OX=6105 PE=1 SV=1	#N/A	TRINITY_DN94_c0_g1_i14
910536	M:2	F:12	p:0.0140786	pcorr:0.0140786	-	#N/A	TRINITY_DN8632_c0_g1_i8
910536	M:2	F:12	p:0.0140786	pcorr:0.0140786	-	#N/A	TRINITY_DN8632_c0_g1_i7
910536	M:2	F:12	p:0.0140786	pcorr:0.0140786	-	#N/A	TRINITY_DN8632_c0_g1_i9
910536	M:2	F:12	p:0.0140786	pcorr:0.0140786	-	#N/A	TRINITY_DN8632_c0_g1_i2
910536	M:2	F:12	p:0.0140786	pcorr:0.0140786	-	#N/A	TRINITY_DN8632_c0_g1_i4
912889	M:4	F:0	p:0.0138458	pcorr:0.0138458	-	#N/A	TRINITY_DN2757_c2_g1_i1
923346	M:5	F:0	p:0.00290775	pcorr:0.00290775	-	Choren_v00_mik.OX359190.1G426.2	TRINITY_DN12727_c0_g1_i1
923346	M:5	F:0	p:0.00290775	pcorr:0.00290775	-	Choren_v00_mik.OX359190.1G426.2	TRINITY_DN7308_c0_g1_i14
923346	M:5	F:0	p:0.00290775	pcorr:0.00290775	-	Choren_v00_mik.OX359190.1G426.2	TRINITY_DN33456_c0_g1_i1
923346	M:5	F:0	p:0.00290775	pcorr:0.00290775	KLH15_HUMANKelch-like protein 15 OS=Homo sapiens OX=9606 GN=KLHL15 PE=1 SV=2	Choren_v00_mik.OX359190.1G426.2	TRINITY_DN33456_c0_g1_i3
923346	M:5	F:0	p:0.00290775	pcorr:0.00290775	-	Choren_v00_mik.OX359190.1G426.2	TRINITY_DN5861_c0_g1_i12
928792	M:5	F:1	p:0.0140786	pcorr:0.0140786	-	#N/A	TRINITY_DN175104_c0_g1_i2
941646	M:7	F:5	p:0.0277373	pcorr:0.0277373	-	#N/A	TRINITY_DN46495_c0_g1_i6
941646	M:7	F:5	p:0.0277373	pcorr:0.0277373	-	#N/A	TRINITY_DN46495_c0_g1_i9
941646	M:7	F:5	p:0.0277373	pcorr:0.0277373	-	#N/A	TRINITY_DN46495_c0_g1_i2
941646	M:7	F:5	p:0.0277373	pcorr:0.0277373	-	#N/A	TRINITY_DN46495_c0_g1_i3
941646	M:7	F:5	p:0.0277373	pcorr:0.0277373	-	#N/A	TRINITY_DN46495_c0_g1_i10
943774	M:7	F:4	p:0.012518	pcorr:0.012518	-	#N/A	TRINITY_DN89756_c0_g2_i4
943774	M:7	F:4	p:0.012518	pcorr:0.012518	-	#N/A	TRINITY_DN89756_c0_g2_i2
943774	M:7	F:4	p:0.012518	pcorr:0.012518	-	#N/A	TRINITY_DN89756_c0_g2_i3
963795	M:1	F:10	p:0.0267948	pcorr:0.0267948	-	Choren_v00_mik.OX359192.1G235.1	TRINITY_DN9254_c0_g2_i10
963795	M:1	F:10	p:0.0267948	pcorr:0.0267948	-	Choren_v00_mik.OX359192.1G235.1	TRINITY_DN9254_c0_g2_i4
963795	M:1	F:10	p:0.0267948	pcorr:0.0267948	PTPRT_HUMANReceptor-type tyrosine-protein phosphatase T OS=Homo sapiens OX=9606 GN=PTPRT PE=1 SV=6	Choren_v00_mik.OX359192.1G235.1	TRINITY_DN1562_c0_g1_i16
963795	M:1	F:10	p:0.0267948	pcorr:0.0267948	PTPRT_HUMANReceptor-type tyrosine-protein phosphatase T OS=Homo sapiens OX=9606 GN=PTPRT PE=1 SV=6	Choren_v00_mik.OX359192.1G235.1	TRINITY_DN1562_c0_g1_i12
963795	M:1	F:10	p:0.0267948	pcorr:0.0267948	PTPRT_HUMANReceptor-type tyrosine-protein phosphatase T OS=Homo sapiens OX=9606 GN=PTPRT PE=1 SV=6	Choren_v00_mik.OX359192.1G235.1	TRINITY_DN1562_c0_g1_i15
972609	M:0	F:11	p:0.00159493	pcorr:0.00159493	-	#N/A	TRINITY_DN38649_c0_g1_i5
972609	M:0	F:11	p:0.00159493	pcorr:0.00159493	DGAT1_MOUSEDiacylglycerol O-acyltransferase 1 OS=Mus musculus OX=10090 GN=Dgat1 PE=1 SV=1	#N/A	TRINITY_DN6318_c0_g1_i9
972609	M:0	F:11	p:0.00159493	pcorr:0.00159493	DGAT1_MOUSEDiacylglycerol O-acyltransferase 1 OS=Mus musculus OX=10090 GN=Dgat1 PE=1 SV=1	#N/A	TRINITY_DN6318_c0_g1_i16
972609	M:0	F:11	p:0.00159493	pcorr:0.00159493	DGAT1_MOUSEDiacylglycerol O-acyltransferase 1 OS=Mus musculus OX=10090 GN=Dgat1 PE=1 SV=1	#N/A	TRINITY_DN6318_c0_g1_i27
972609	M:0	F:11	p:0.00159493	pcorr:0.00159493	DGAT1_MOUSEDiacylglycerol O-acyltransferase 1 OS=Mus musculus OX=10090 GN=Dgat1 PE=1 SV=1	#N/A	TRINITY_DN6318_c0_g1_i20
990119	M:0	F:8	p:0.0277373	pcorr:0.0277373	-	#N/A	TRINITY_DN96266_c0_g1_i5
990119	M:0	F:8	p:0.0277373	pcorr:0.0277373	-	#N/A	TRINITY_DN1829_c2_g1_i8
990119	M:0	F:8	p:0.0277373	pcorr:0.0277373	-	#N/A	TRINITY_DN1829_c2_g1_i14
990119	M:0	F:8	p:0.0277373	pcorr:0.0277373	-	#N/A	TRINITY_DN1829_c2_g1_i19
990119	M:0	F:8	p:0.0277373	pcorr:0.0277373	-	#N/A	TRINITY_DN1829_c2_g1_i4
1031437	M:5	F:2	p:0.0439132	pcorr:0.0439132	-	Choren_v00_mik.OX359197.1G511.1	TRINITY_DN76_c0_g2_i8
1031437	M:5	F:2	p:0.0439132	pcorr:0.0439132	-	Choren_v00_mik.OX359197.1G511.1	TRINITY_DN76_c0_g2_i8
1031437	M:5	F:2	p:0.0439132	pcorr:0.0439132	-	Choren_v00_mik.OX359197.1G511.1	TRINITY_DN44842_c0_g1_i1
1031437	M:5	F:2	p:0.0439132	pcorr:0.0439132	-	Choren_v00_mik.OX359197.1G511.1	TRINITY_DN44842_c0_g1_i3
1031437	M:5	F:2	p:0.0439132	pcorr:0.0439132	-	Choren_v00_mik.OX359197.1G511.1	TRINITY_DN44842_c0_g1_i4
1031437	M:5	F:2	p:0.0439132	pcorr:0.0439132	-	Choren_v00_mik.OX359197.1G511.1	TRINITY_DN23024_c0_g1_i1
1034535	M:0	F:8	p:0.0277373	pcorr:0.0277373	-	Choren_v00_mik.OX359190.1G983.1	TRINITY_DN2794_c0_g1_i5
1034535	M:0	F:8	p:0.0277373	pcorr:0.0277373	-	Choren_v00_mik.OX359190.1G983.1	TRINITY_DN2794_c0_g1_i1
1034535	M:0	F:8	p:0.0277373	pcorr:0.0277373	-	Choren_v00_mik.OX359190.1G983.1	TRINITY_DN2794_c0_g1_i13
1034535	M:0	F:8	p:0.0277373	pcorr:0.0277373	-	Choren_v00_mik.OX359190.1G983.1	TRINITY_DN202715_c0_g1_i5
1034535	M:0	F:8	p:0.0277373	pcorr:0.0277373	-	Choren_v00_mik.OX359190.1G983.1	TRINITY_DN202715_c0_g1_i1
1045518	M:5	F:2	p:0.0439132	pcorr:0.0439132	RAS2_PHYPORas-like protein 2 OS=Physarum polycephalum OX=5791 GN=RAS-2 PE=2 SV=1	#N/A	TRINITY_DN1073_c2_g1_i11
1045518	M:5	F:2	p:0.0439132	pcorr:0.0439132	RAS2_PHYPORas-like protein 2 OS=Physarum polycephalum OX=5791 GN=RAS-2 PE=2 SV=1	#N/A	TRINITY_DN1073_c2_g1_i4
1045518	M:5	F:2	p:0.0439132	pcorr:0.0439132	RAS2_PHYPORas-like protein 2 OS=Physarum polycephalum OX=5791 GN=RAS-2 PE=2 SV=1	#N/A	TRINITY_DN1073_c2_g1_i5
1045518	M:5	F:2	p:0.0439132	pcorr:0.0439132	RAS2_PHYPORas-like protein 2 OS=Physarum polycephalum OX=5791 GN=RAS-2 PE=2 SV=1	#N/A	TRINITY_DN1073_c2_g1_i10
1045518	M:5	F:2	p:0.0439132	pcorr:0.0439132	RAS2_PHYPORas-like protein 2 OS=Physarum polycephalum OX=5791 GN=RAS-2 PE=2 SV=1	#N/A	TRINITY_DN1073_c2_g1_i8
1051426	M:4	F:0	p:0.0138458	pcorr:0.0138458	-	#N/A	TRINITY_DN53942_c0_g1_i5
1051426	M:4	F:0	p:0.0138458	pcorr:0.0138458	-	#N/A	TRINITY_DN53942_c0_g1_i7
1051426	M:4	F:0	p:0.0138458	pcorr:0.0138458	-	#N/A	TRINITY_DN53942_c0_g1_i8
1051426	M:4	F:0	p:0.0138458	pcorr:0.0138458	-	#N/A	TRINITY_DN4081_c0_g2_i6
1051426	M:4	F:0	p:0.0138458	pcorr:0.0138458	-	#N/A	TRINITY_DN4081_c0_g2_i1
1061254	M:5	F:1	p:0.0140786	pcorr:0.0140786	CH60_HAHCHChaperonin GroEL OS=Hahella chejuensis (strain KCTC 2396) OX=349521 GN=groEL PE=3 SV=1	#N/A	TRINITY_DN128525_c0_g1_i1
1065742	M:7	F:5	p:0.0277373	pcorr:0.0277373	-	Choren_v00_mik.OX359191.1G625.1	TRINITY_DN41920_c0_g1_i2
1065742	M:7	F:5	p:0.0277373	pcorr:0.0277373	-	Choren_v00_mik.OX359191.1G625.1	TRINITY_DN41920_c0_g1_i8
1065742	M:7	F:5	p:0.0277373	pcorr:0.0277373	-	Choren_v00_mik.OX359191.1G625.1	TRINITY_DN41920_c0_g1_i4
1065742	M:7	F:5	p:0.0277373	pcorr:0.0277373	-	Choren_v00_mik.OX359191.1G625.1	TRINITY_DN41920_c0_g1_i11
1065742	M:7	F:5	p:0.0277373	pcorr:0.0277373	-	Choren_v00_mik.OX359191.1G625.1	TRINITY_DN41920_c0_g1_i3
1087579	M:5	F:2	p:0.0439132	pcorr:0.0439132	TMED1_HUMANTransmembrane emp24 domain-containing protein 1 OS=Homo sapiens OX=9606 GN=TMED1 PE=1 SV=1	Choren_v00_mik.OX359195.1G756.1	TRINITY_DN18069_c0_g2_i3
1087579	M:5	F:2	p:0.0439132	pcorr:0.0439132	TMED1_MOUSETransmembrane emp24 domain-containing protein 1 OS=Mus musculus OX=10090 GN=Tmed1 PE=1 SV=1	Choren_v00_mik.OX359195.1G756.1	TRINITY_DN18069_c0_g2_i4
1087579	M:5	F:2	p:0.0439132	pcorr:0.0439132	TMED5_RATTransmembrane emp24 domain-containing protein 5 OS=Rattus norvegicus OX=10116 GN=Tmed5 PE=2 SV=1	Choren_v00_mik.OX359195.1G756.1	TRINITY_DN18069_c0_g2_i7
1087579	M:5	F:2	p:0.0439132	pcorr:0.0439132	TMED1_XENTRTransmembrane emp24 domain-containing protein 1 OS=Xenopus tropicalis OX=8364 GN=tmed1 PE=2 SV=1	Choren_v00_mik.OX359195.1G756.1	TRINITY_DN18069_c0_g2_i2
1087579	M:5	F:2	p:0.0439132	pcorr:0.0439132	TMED1_MOUSETransmembrane emp24 domain-containing protein 1 OS=Mus musculus OX=10090 GN=Tmed1 PE=1 SV=1	Choren_v00_mik.OX359195.1G756.1	TRINITY_DN18069_c0_g2_i10
1091279	M:5	F:1	p:0.0140786	pcorr:0.0140786	NOLG_RHIMENodulation protein NolG OS=Rhizobium meliloti (strain 1021) OX=266834 GN=nolG PE=3 SV=2	#N/A	TRINITY_DN166548_c0_g1_i7
1091279	M:5	F:1	p:0.0140786	pcorr:0.0140786	MACA_YERPEMacrolide export protein MacA OS=Yersinia pestis OX=632 GN=macA PE=3 SV=1	#N/A	TRINITY_DN166548_c0_g1_i5
1091279	M:5	F:1	p:0.0140786	pcorr:0.0140786	MACA_YERPEMacrolide export protein MacA OS=Yersinia pestis OX=632 GN=macA PE=3 SV=1	#N/A	TRINITY_DN166548_c0_g1_i4
1091279	M:5	F:1	p:0.0140786	pcorr:0.0140786	NOLG_RHIMENodulation protein NolG OS=Rhizobium meliloti (strain 1021) OX=266834 GN=nolG PE=3 SV=2	#N/A	TRINITY_DN166548_c0_g1_i1
1091279	M:5	F:1	p:0.0140786	pcorr:0.0140786	MDTC_PHOLLMultidrug resistance protein MdtC OS=Photorhabdus laumondii subsp. laumondii (strain DSM 15139 / CIP 105565 / TT01) OX=243265 GN=mdtC PE=3 SV=1	#N/A	TRINITY_DN166548_c0_g1_i2
1091516	M:6	F:3	p:0.0267948	pcorr:0.0267948	-	Choren_v00_mik.OX359193.1G886.1	TRINITY_DN16038_c0_g1_i2
1091516	M:6	F:3	p:0.0267948	pcorr:0.0267948	-	Choren_v00_mik.OX359193.1G886.1	TRINITY_DN6261_c1_g2_i10
1091516	M:6	F:3	p:0.0267948	pcorr:0.0267948	-	Choren_v00_mik.OX359193.1G886.1	TRINITY_DN6261_c1_g2_i3
1091516	M:6	F:3	p:0.0267948	pcorr:0.0267948	-	Choren_v00_mik.OX359193.1G886.1	TRINITY_DN16038_c0_g1_i10
1091516	M:6	F:3	p:0.0267948	pcorr:0.0267948	-	Choren_v00_mik.OX359193.1G886.1	TRINITY_DN16038_c0_g1_i8
1096310	M:6	F:1	p:0.00271931	pcorr:0.00271931	-	#N/A	TRINITY_DN12206_c2_g1_i1
1096310	M:6	F:1	p:0.00271931	pcorr:0.00271931	-	#N/A	TRINITY_DN12206_c2_g1_i7
1096310	M:6	F:1	p:0.00271931	pcorr:0.00271931	-	#N/A	TRINITY_DN12206_c2_g1_i3
1096310	M:6	F:1	p:0.00271931	pcorr:0.00271931	-	#N/A	TRINITY_DN12206_c2_g1_i4
1096310	M:6	F:1	p:0.00271931	pcorr:0.00271931	-	#N/A	TRINITY_DN12206_c2_g1_i2
1101701	M:6	F:3	p:0.0267948	pcorr:0.0267948	-	#N/A	TRINITY_DN6498_c0_g2_i1
1106717	M:0	F:8	p:0.0277373	pcorr:0.0277373	-	Choren_v00_mik.OX359200.1G565.1	TRINITY_DN38827_c0_g2_i3
1106717	M:0	F:8	p:0.0277373	pcorr:0.0277373	-	Choren_v00_mik.OX359200.1G565.1	TRINITY_DN38827_c0_g2_i7
1106717	M:0	F:8	p:0.0277373	pcorr:0.0277373	-	Choren_v00_mik.OX359200.1G565.1	TRINITY_DN38827_c0_g2_i1
1106717	M:0	F:8	p:0.0277373	pcorr:0.0277373	-	Choren_v00_mik.OX359200.1G565.1	TRINITY_DN14058_c2_g1_i1
1106717	M:0	F:8	p:0.0277373	pcorr:0.0277373	-	Choren_v00_mik.OX359200.1G565.1	TRINITY_DN38827_c0_g2_i2
1111330	M:5	F:2	p:0.0439132	pcorr:0.0439132	-	Choren_v00_mik.OX359192.1G235.1	TRINITY_DN2928_c2_g1_i1
1111330	M:5	F:2	p:0.0439132	pcorr:0.0439132	-	Choren_v00_mik.OX359192.1G235.1	TRINITY_DN2928_c2_g1_i3
1111330	M:5	F:2	p:0.0439132	pcorr:0.0439132	-	Choren_v00_mik.OX359192.1G235.1	TRINITY_DN2928_c2_g1_i2
1111330	M:5	F:2	p:0.0439132	pcorr:0.0439132	SLX1_MOUSEStructure-specific endonuclease subunit SLX1 OS=Mus musculus OX=10090 GN=Slx1b PE=2 SV=1	Choren_v00_mik.OX359192.1G235.1	TRINITY_DN29139_c0_g1_i2
1111330	M:5	F:2	p:0.0439132	pcorr:0.0439132	SLX1_XENLAStructure-specific endonuclease subunit slx1 OS=Xenopus laevis OX=8355 GN=slx1a PE=2 SV=1	Choren_v00_mik.OX359192.1G235.1	TRINITY_DN29139_c0_g1_i3
1126847	M:5	F:1	p:0.0140786	pcorr:0.0140786	-	#N/A	TRINITY_DN48973_c0_g1_i5
1126847	M:5	F:1	p:0.0140786	pcorr:0.0140786	-	#N/A	TRINITY_DN48973_c0_g1_i7
1126847	M:5	F:1	p:0.0140786	pcorr:0.0140786	-	#N/A	TRINITY_DN48973_c0_g1_i3
1126847	M:5	F:1	p:0.0140786	pcorr:0.0140786	-	#N/A	TRINITY_DN48973_c0_g1_i6
1126847	M:5	F:1	p:0.0140786	pcorr:0.0140786	-	#N/A	TRINITY_DN48973_c0_g1_i8
1140894	M:6	F:2	p:0.00977293	pcorr:0.00977293	FAT1_HUMANProtocadherin Fat 1 OS=Homo sapiens OX=9606 GN=FAT1 PE=1 SV=2	Choren_v00_mik.OX359200.1G829.1	TRINITY_DN2431_c0_g1_i19
1140894	M:6	F:2	p:0.00977293	pcorr:0.00977293	FAT4_MOUSEProtocadherin Fat 4 OS=Mus musculus OX=10090 GN=Fat4 PE=1 SV=2	Choren_v00_mik.OX359200.1G829.1	TRINITY_DN2431_c0_g1_i18
1140894	M:6	F:2	p:0.00977293	pcorr:0.00977293	FAT4_MOUSEProtocadherin Fat 4 OS=Mus musculus OX=10090 GN=Fat4 PE=1 SV=2	Choren_v00_mik.OX359200.1G829.1	TRINITY_DN2431_c0_g1_i11
1140894	M:6	F:2	p:0.00977293	pcorr:0.00977293	FAT4_HUMANProtocadherin Fat 4 OS=Homo sapiens OX=9606 GN=FAT4 PE=1 SV=2	Choren_v00_mik.OX359200.1G829.1	TRINITY_DN2431_c0_g1_i1
1140894	M:6	F:2	p:0.00977293	pcorr:0.00977293	FAT4_MOUSEProtocadherin Fat 4 OS=Mus musculus OX=10090 GN=Fat4 PE=1 SV=2	Choren_v00_mik.OX359200.1G829.1	TRINITY_DN2431_c0_g1_i10
1147752	M:0	F:9	p:0.012518	pcorr:0.012518	PTPRF_DANREReceptor-type tyrosine-protein phosphatase F OS=Danio rerio OX=7955 GN=ptprf PE=2 SV=1	Choren_v00_mik.OX359194.1G553.2	TRINITY_DN203_c0_g1_i9
1147752	M:0	F:9	p:0.012518	pcorr:0.012518	PTPRF_DANREReceptor-type tyrosine-protein phosphatase F OS=Danio rerio OX=7955 GN=ptprf PE=2 SV=1	Choren_v00_mik.OX359194.1G553.2	TRINITY_DN203_c0_g1_i6
1147752	M:0	F:9	p:0.012518	pcorr:0.012518	PTPRF_DANREReceptor-type tyrosine-protein phosphatase F OS=Danio rerio OX=7955 GN=ptprf PE=2 SV=1	Choren_v00_mik.OX359194.1G553.2	TRINITY_DN203_c0_g1_i8
1147752	M:0	F:9	p:0.012518	pcorr:0.012518	PTPRF_DANREReceptor-type tyrosine-protein phosphatase F OS=Danio rerio OX=7955 GN=ptprf PE=2 SV=1	Choren_v00_mik.OX359194.1G553.2	TRINITY_DN203_c0_g1_i1
1147752	M:0	F:9	p:0.012518	pcorr:0.012518	DSCL1_MOUSECell adhesion molecule DSCAML1 OS=Mus musculus OX=10090 GN=Dscaml1 PE=1 SV=2	Choren_v00_mik.OX359194.1G553.2	TRINITY_DN203_c0_g1_i3
1166805	M:1	F:11	p:0.00977293	pcorr:0.00977293	-	#N/A	TRINITY_DN4234_c0_g1_i13
1166805	M:1	F:11	p:0.00977293	pcorr:0.00977293	-	#N/A	TRINITY_DN4234_c0_g1_i7
1166805	M:1	F:11	p:0.00977293	pcorr:0.00977293	-	#N/A	TRINITY_DN4234_c0_g1_i18
1166805	M:1	F:11	p:0.00977293	pcorr:0.00977293	-	#N/A	TRINITY_DN4234_c0_g1_i17
1166805	M:1	F:11	p:0.00977293	pcorr:0.00977293	-	#N/A	TRINITY_DN56_c1_g1_i1
1186182	M:0	F:13	p:6.87148e-05	pcorr:6.87148e-05	-	#N/A	TRINITY_DN7763_c0_g1_i1
1186182	M:0	F:13	p:6.87148e-05	pcorr:6.87148e-05	-	#N/A	TRINITY_DN7763_c0_g1_i2
1186182	M:0	F:13	p:6.87148e-05	pcorr:6.87148e-05	-	#N/A	TRINITY_DN6164_c7_g1_i1
1186182	M:0	F:13	p:6.87148e-05	pcorr:6.87148e-05	-	#N/A	TRINITY_DN7763_c0_g1_i4
1186182	M:0	F:13	p:6.87148e-05	pcorr:6.87148e-05	-	#N/A	TRINITY_DN76964_c0_g1_i1
1193267	M:2	F:12	p:0.0140786	pcorr:0.0140786	-	#N/A	TRINITY_DN163974_c0_g1_i2
1193267	M:2	F:12	p:0.0140786	pcorr:0.0140786	-	#N/A	TRINITY_DN163974_c0_g1_i1
1193267	M:2	F:12	p:0.0140786	pcorr:0.0140786	-	#N/A	TRINITY_DN838_c1_g1_i3
1193267	M:2	F:12	p:0.0140786	pcorr:0.0140786	-	#N/A	TRINITY_DN838_c1_g1_i5
1193267	M:2	F:12	p:0.0140786	pcorr:0.0140786	-	#N/A	TRINITY_DN14168_c1_g1_i4
1201444	M:5	F:2	p:0.0439132	pcorr:0.0439132	DPOG1_RATDNA polymerase subunit gamma-1 OS=Rattus norvegicus OX=10116 GN=Polg PE=2 SV=1	#N/A	TRINITY_DN9017_c0_g1_i8
1201444	M:5	F:2	p:0.0439132	pcorr:0.0439132	DPOG1_RATDNA polymerase subunit gamma-1 OS=Rattus norvegicus OX=10116 GN=Polg PE=2 SV=1	#N/A	TRINITY_DN9017_c0_g1_i9
1201444	M:5	F:2	p:0.0439132	pcorr:0.0439132	DPOG1_RATDNA polymerase subunit gamma-1 OS=Rattus norvegicus OX=10116 GN=Polg PE=2 SV=1	#N/A	TRINITY_DN9017_c0_g1_i11
1201444	M:5	F:2	p:0.0439132	pcorr:0.0439132	DPOG1_HUMANDNA polymerase subunit gamma-1 OS=Homo sapiens OX=9606 GN=POLG PE=1 SV=1	#N/A	TRINITY_DN9017_c0_g1_i5
1201444	M:5	F:2	p:0.0439132	pcorr:0.0439132	DPOG1_RATDNA polymerase subunit gamma-1 OS=Rattus norvegicus OX=10116 GN=Polg PE=2 SV=1	#N/A	TRINITY_DN9017_c0_g1_i1
1212691	M:6	F:3	p:0.0267948	pcorr:0.0267948	-	#N/A	TRINITY_DN135953_c0_g1_i1
1212691	M:6	F:3	p:0.0267948	pcorr:0.0267948	Y4JD_SINFNUncharacterized protein y4jD OS=Sinorhizobium fredii (strain NBRC 101917 / NGR234) OX=394 GN=NGR_a03120 PE=3 SV=1	#N/A	TRINITY_DN8211_c0_g2_i3
1247285	M:0	F:13	p:6.87148e-05	pcorr:6.87148e-05	-	#N/A	TRINITY_DN84668_c0_g1_i1
1250221	M:5	F:2	p:0.0439132	pcorr:0.0439132	-	Choren_v00_mik.OX359194.1G515.1	TRINITY_DN2447_c0_g1_i13
1250221	M:5	F:2	p:0.0439132	pcorr:0.0439132	-	Choren_v00_mik.OX359194.1G515.1	TRINITY_DN70733_c0_g4_i1
1250221	M:5	F:2	p:0.0439132	pcorr:0.0439132	TIGD4_MOUSETigger transposable element-derived protein 4 OS=Mus musculus OX=10090 GN=Tigd4 PE=2 SV=1	Choren_v00_mik.OX359194.1G515.1	TRINITY_DN70733_c0_g3_i1
1250635	M:5	F:0	p:0.00290775	pcorr:0.00290775	-	Choren_v00_mik.OX359197.1G725.1	TRINITY_DN195286_c0_g2_i1
1250635	M:5	F:0	p:0.00290775	pcorr:0.00290775	-	Choren_v00_mik.OX359197.1G725.1	TRINITY_DN210784_c0_g1_i1
1266299	M:4	F:0	p:0.0138458	pcorr:0.0138458	-	#N/A	TRINITY_DN103366_c0_g1_i1
1266299	M:4	F:0	p:0.0138458	pcorr:0.0138458	-	#N/A	TRINITY_DN2928_c3_g1_i1
1266299	M:4	F:0	p:0.0138458	pcorr:0.0138458	-	#N/A	TRINITY_DN3629_c0_g3_i1
1266299	M:4	F:0	p:0.0138458	pcorr:0.0138458	-	#N/A	TRINITY_DN39714_c0_g1_i1
1266299	M:4	F:0	p:0.0138458	pcorr:0.0138458	-	#N/A	TRINITY_DN39714_c0_g1_i6
1272523	M:5	F:0	p:0.00290775	pcorr:0.00290775	-	#N/A	TRINITY_DN313_c2_g1_i12
1272523	M:5	F:0	p:0.00290775	pcorr:0.00290775	-	#N/A	TRINITY_DN313_c2_g1_i7
1272523	M:5	F:0	p:0.00290775	pcorr:0.00290775	-	#N/A	TRINITY_DN313_c2_g1_i15
1272523	M:5	F:0	p:0.00290775	pcorr:0.00290775	-	#N/A	TRINITY_DN313_c2_g1_i16
1272523	M:5	F:0	p:0.00290775	pcorr:0.00290775	-	#N/A	TRINITY_DN35679_c0_g2_i3
1297146	M:7	F:3	p:0.00491056	pcorr:0.00491056	-	#N/A	TRINITY_DN8721_c0_g1_i1
1297231	M:2	F:13	p:0.00290775	pcorr:0.00290775	ATPA_PIGATP synthase subunit alpha, mitochondrial OS=Sus scrofa OX=9823 GN=ATP5F1A PE=1 SV=2	Choren_v00_mik.OX359192.1G644.1	TRINITY_DN1362_c1_g1_i14
1297231	M:2	F:13	p:0.00290775	pcorr:0.00290775	ATPA_PIGATP synthase subunit alpha, mitochondrial OS=Sus scrofa OX=9823 GN=ATP5F1A PE=1 SV=2	Choren_v00_mik.OX359192.1G644.1	TRINITY_DN1362_c1_g1_i12
1297231	M:2	F:13	p:0.00290775	pcorr:0.00290775	ATPA_XENLAATP synthase subunit alpha, mitochondrial OS=Xenopus laevis OX=8355 GN=atp5f1a PE=2 SV=1	Choren_v00_mik.OX359192.1G644.1	TRINITY_DN1362_c1_g1_i11
1297231	M:2	F:13	p:0.00290775	pcorr:0.00290775	ATPA_XENLAATP synthase subunit alpha, mitochondrial OS=Xenopus laevis OX=8355 GN=atp5f1a PE=2 SV=1	Choren_v00_mik.OX359192.1G644.1	TRINITY_DN1362_c1_g1_i15
1297231	M:2	F:13	p:0.00290775	pcorr:0.00290775	ATPA_PIGATP synthase subunit alpha, mitochondrial OS=Sus scrofa OX=9823 GN=ATP5F1A PE=1 SV=2	Choren_v00_mik.OX359192.1G644.1	TRINITY_DN1362_c1_g1_i4
1304852	M:5	F:2	p:0.0439132	pcorr:0.0439132	-	Choren_v00_mik.OX359192.1G235.1	TRINITY_DN2928_c2_g1_i1
1304852	M:5	F:2	p:0.0439132	pcorr:0.0439132	-	Choren_v00_mik.OX359192.1G235.1	TRINITY_DN2928_c2_g1_i3
1304852	M:5	F:2	p:0.0439132	pcorr:0.0439132	-	Choren_v00_mik.OX359192.1G235.1	TRINITY_DN2928_c2_g1_i2
1304852	M:5	F:2	p:0.0439132	pcorr:0.0439132	SLX1_MOUSEStructure-specific endonuclease subunit SLX1 OS=Mus musculus OX=10090 GN=Slx1b PE=2 SV=1	Choren_v00_mik.OX359192.1G235.1	TRINITY_DN29139_c0_g1_i2
1304852	M:5	F:2	p:0.0439132	pcorr:0.0439132	SLX1_XENLAStructure-specific endonuclease subunit slx1 OS=Xenopus laevis OX=8355 GN=slx1a PE=2 SV=1	Choren_v00_mik.OX359192.1G235.1	TRINITY_DN29139_c0_g1_i3
1305740	M:5	F:1	p:0.0140786	pcorr:0.0140786	PAE5_ARATHPectin acetylesterase 5 OS=Arabidopsis thaliana OX=3702 GN=PAE5 PE=2 SV=1	Choren_v00_mik.OX359193.1G1349.1	TRINITY_DN240_c0_g1_i3
1305740	M:5	F:1	p:0.0140786	pcorr:0.0140786	PAE9_ARATHPectin acetylesterase 9 OS=Arabidopsis thaliana OX=3702 GN=PAE9 PE=2 SV=1	Choren_v00_mik.OX359193.1G1349.1	TRINITY_DN240_c0_g1_i21
1305740	M:5	F:1	p:0.0140786	pcorr:0.0140786	PAE5_ARATHPectin acetylesterase 5 OS=Arabidopsis thaliana OX=3702 GN=PAE5 PE=2 SV=1	Choren_v00_mik.OX359193.1G1349.1	TRINITY_DN240_c0_g1_i7
1305740	M:5	F:1	p:0.0140786	pcorr:0.0140786	PAE9_ARATHPectin acetylesterase 9 OS=Arabidopsis thaliana OX=3702 GN=PAE9 PE=2 SV=1	Choren_v00_mik.OX359193.1G1349.1	TRINITY_DN240_c0_g1_i12
1305740	M:5	F:1	p:0.0140786	pcorr:0.0140786	PAE9_ARATHPectin acetylesterase 9 OS=Arabidopsis thaliana OX=3702 GN=PAE9 PE=2 SV=1	Choren_v00_mik.OX359193.1G1349.1	TRINITY_DN240_c0_g1_i1
1306549	M:1	F:13	p:0.000504657	pcorr:0.000504657	-	Choren_v00_mik.OX359191.1G476.1	TRINITY_DN9070_c0_g1_i11
1306549	M:1	F:13	p:0.000504657	pcorr:0.000504657	-	Choren_v00_mik.OX359191.1G476.1	TRINITY_DN9070_c0_g1_i6
1306818	M:0	F:8	p:0.0277373	pcorr:0.0277373	-	#N/A	TRINITY_DN186417_c0_g1_i1
1306818	M:0	F:8	p:0.0277373	pcorr:0.0277373	PAR14_HUMANProtein mono-ADP-ribosyltransferase PARP14 OS=Homo sapiens OX=9606 GN=PARP14 PE=1 SV=3	#N/A	TRINITY_DN372_c0_g1_i9
1306818	M:0	F:8	p:0.0277373	pcorr:0.0277373	PAR14_HUMANProtein mono-ADP-ribosyltransferase PARP14 OS=Homo sapiens OX=9606 GN=PARP14 PE=1 SV=3	#N/A	TRINITY_DN372_c0_g1_i4
1306818	M:0	F:8	p:0.0277373	pcorr:0.0277373	PAR14_HUMANProtein mono-ADP-ribosyltransferase PARP14 OS=Homo sapiens OX=9606 GN=PARP14 PE=1 SV=3	#N/A	TRINITY_DN372_c0_g1_i3
1306818	M:0	F:8	p:0.0277373	pcorr:0.0277373	PAR14_HUMANProtein mono-ADP-ribosyltransferase PARP14 OS=Homo sapiens OX=9606 GN=PARP14 PE=1 SV=3	#N/A	TRINITY_DN372_c0_g1_i13
1309498	M:0	F:13	p:6.87148e-05	pcorr:6.87148e-05	-	Choren_v00_mik.OX359192.1G235.1	TRINITY_DN2928_c2_g1_i1
1309498	M:0	F:13	p:6.87148e-05	pcorr:6.87148e-05	-	Choren_v00_mik.OX359192.1G235.1	TRINITY_DN2928_c2_g1_i3
1309498	M:0	F:13	p:6.87148e-05	pcorr:6.87148e-05	-	Choren_v00_mik.OX359192.1G235.1	TRINITY_DN2928_c2_g1_i2
1309498	M:0	F:13	p:6.87148e-05	pcorr:6.87148e-05	SLX1_MOUSEStructure-specific endonuclease subunit SLX1 OS=Mus musculus OX=10090 GN=Slx1b PE=2 SV=1	Choren_v00_mik.OX359192.1G235.1	TRINITY_DN29139_c0_g1_i2
1309498	M:0	F:13	p:6.87148e-05	pcorr:6.87148e-05	SLX1_XENLAStructure-specific endonuclease subunit slx1 OS=Xenopus laevis OX=8355 GN=slx1a PE=2 SV=1	Choren_v00_mik.OX359192.1G235.1	TRINITY_DN29139_c0_g1_i3
1319566	M:0	F:13	p:6.87148e-05	pcorr:6.87148e-05	-	#N/A	TRINITY_DN24553_c0_g1_i5
1319566	M:0	F:13	p:6.87148e-05	pcorr:6.87148e-05	-	#N/A	TRINITY_DN24553_c0_g1_i3
1319566	M:0	F:13	p:6.87148e-05	pcorr:6.87148e-05	-	#N/A	TRINITY_DN24553_c0_g1_i1
1319566	M:0	F:13	p:6.87148e-05	pcorr:6.87148e-05	-	#N/A	TRINITY_DN24553_c0_g1_i7
1319566	M:0	F:13	p:6.87148e-05	pcorr:6.87148e-05	-	#N/A	TRINITY_DN24553_c0_g1_i12
1324055	M:4	F:0	p:0.0138458	pcorr:0.0138458	-	Choren_v00_mik.OX359198.1G818.1	TRINITY_DN53641_c0_g1_i2
1324055	M:4	F:0	p:0.0138458	pcorr:0.0138458	-	Choren_v00_mik.OX359198.1G818.1	TRINITY_DN53641_c0_g1_i4
1324055	M:4	F:0	p:0.0138458	pcorr:0.0138458	-	Choren_v00_mik.OX359198.1G818.1	TRINITY_DN53641_c0_g1_i1
1324284	M:6	F:3	p:0.0267948	pcorr:0.0267948	-	Choren_v00_mik.OX359196.1G475.1	TRINITY_DN3577_c1_g1_i13
1324284	M:6	F:3	p:0.0267948	pcorr:0.0267948	-	Choren_v00_mik.OX359196.1G475.1	TRINITY_DN3577_c1_g1_i18
1324284	M:6	F:3	p:0.0267948	pcorr:0.0267948	-	Choren_v00_mik.OX359196.1G475.1	TRINITY_DN3577_c1_g1_i9
1324284	M:6	F:3	p:0.0267948	pcorr:0.0267948	-	Choren_v00_mik.OX359196.1G475.1	TRINITY_DN3577_c1_g1_i6
1324284	M:6	F:3	p:0.0267948	pcorr:0.0267948	-	Choren_v00_mik.OX359196.1G475.1	TRINITY_DN3577_c1_g1_i3
1330071	M:5	F:2	p:0.0439132	pcorr:0.0439132	MALT1_HUMANMucosa-associated lymphoid tissue lymphoma translocation protein 1 OS=Homo sapiens OX=9606 GN=MALT1 PE=1 SV=1	#N/A	TRINITY_DN18233_c0_g1_i9
1330071	M:5	F:2	p:0.0439132	pcorr:0.0439132	MALT1_HUMANMucosa-associated lymphoid tissue lymphoma translocation protein 1 OS=Homo sapiens OX=9606 GN=MALT1 PE=1 SV=1	#N/A	TRINITY_DN18233_c0_g1_i5
1330071	M:5	F:2	p:0.0439132	pcorr:0.0439132	MALT1_HUMANMucosa-associated lymphoid tissue lymphoma translocation protein 1 OS=Homo sapiens OX=9606 GN=MALT1 PE=1 SV=1	#N/A	TRINITY_DN18233_c0_g1_i12
1330071	M:5	F:2	p:0.0439132	pcorr:0.0439132	MALT1_HUMANMucosa-associated lymphoid tissue lymphoma translocation protein 1 OS=Homo sapiens OX=9606 GN=MALT1 PE=1 SV=1	#N/A	TRINITY_DN18233_c0_g1_i13
1330071	M:5	F:2	p:0.0439132	pcorr:0.0439132	MALT1_HUMANMucosa-associated lymphoid tissue lymphoma translocation protein 1 OS=Homo sapiens OX=9606 GN=MALT1 PE=1 SV=1	#N/A	TRINITY_DN18233_c0_g1_i4
1334803	M:4	F:0	p:0.0138458	pcorr:0.0138458	-	#N/A	TRINITY_DN57817_c0_g1_i5
1334803	M:4	F:0	p:0.0138458	pcorr:0.0138458	-	#N/A	TRINITY_DN57817_c0_g1_i3
1334803	M:4	F:0	p:0.0138458	pcorr:0.0138458	-	#N/A	TRINITY_DN57817_c0_g1_i4
1334803	M:4	F:0	p:0.0138458	pcorr:0.0138458	-	#N/A	TRINITY_DN57817_c0_g1_i11
1334803	M:4	F:0	p:0.0138458	pcorr:0.0138458	-	#N/A	TRINITY_DN57817_c0_g1_i2
1336102	M:4	F:0	p:0.0138458	pcorr:0.0138458	PDE3A_RATcGMP-inhibited 3',5'-cyclic phosphodiesterase 3A OS=Rattus norvegicus OX=10116 GN=Pde3a PE=1 SV=1	#N/A	TRINITY_DN10129_c0_g1_i5
1343716	M:6	F:2	p:0.00977293	pcorr:0.00977293	PO21_NASVIRetrovirus-related Pol polyprotein from type-1 retrotransposable element R2 (Fragment) OS=Nasonia vitripennis OX=7425 PE=4 SV=2	Choren_v00_mik.OX359191.1G405.1	TRINITY_DN1825_c1_g1_i12
1343716	M:6	F:2	p:0.00977293	pcorr:0.00977293	PO21_NASVIRetrovirus-related Pol polyprotein from type-1 retrotransposable element R2 (Fragment) OS=Nasonia vitripennis OX=7425 PE=4 SV=2	Choren_v00_mik.OX359191.1G405.1	TRINITY_DN1825_c1_g1_i4
1343716	M:6	F:2	p:0.00977293	pcorr:0.00977293	PO21_NASVIRetrovirus-related Pol polyprotein from type-1 retrotransposable element R2 (Fragment) OS=Nasonia vitripennis OX=7425 PE=4 SV=2	Choren_v00_mik.OX359191.1G405.1	TRINITY_DN1825_c1_g1_i15
1343716	M:6	F:2	p:0.00977293	pcorr:0.00977293	PO21_NASVIRetrovirus-related Pol polyprotein from type-1 retrotransposable element R2 (Fragment) OS=Nasonia vitripennis OX=7425 PE=4 SV=2	Choren_v00_mik.OX359191.1G405.1	TRINITY_DN1825_c1_g1_i6
1343716	M:6	F:2	p:0.00977293	pcorr:0.00977293	-	Choren_v00_mik.OX359191.1G405.1	TRINITY_DN98110_c0_g3_i1
1346300	M:5	F:1	p:0.0140786	pcorr:0.0140786	-	#N/A	TRINITY_DN59069_c0_g1_i1
1348078	M:5	F:2	p:0.0439132	pcorr:0.0439132	-	#N/A	TRINITY_DN37990_c0_g1_i1
1348078	M:5	F:2	p:0.0439132	pcorr:0.0439132	-	#N/A	TRINITY_DN1829_c2_g1_i14
1348078	M:5	F:2	p:0.0439132	pcorr:0.0439132	-	#N/A	TRINITY_DN1829_c2_g1_i19
1348078	M:5	F:2	p:0.0439132	pcorr:0.0439132	-	#N/A	TRINITY_DN1829_c2_g1_i4
1348078	M:5	F:2	p:0.0439132	pcorr:0.0439132	-	#N/A	TRINITY_DN1829_c2_g1_i8
1350163	M:7	F:4	p:0.012518	pcorr:0.012518	COX1_METSECytochrome c oxidase subunit 1 OS=Metridium senile OX=6116 GN=COI PE=3 SV=1	#N/A	TRINITY_DN1768_c0_g1_i1
1350163	M:7	F:4	p:0.012518	pcorr:0.012518	COX1_METSECytochrome c oxidase subunit 1 OS=Metridium senile OX=6116 GN=COI PE=3 SV=1	#N/A	TRINITY_DN1768_c0_g1_i2
1350163	M:7	F:4	p:0.012518	pcorr:0.012518	-	#N/A	TRINITY_DN129542_c0_g1_i1
1379423	M:5	F:2	p:0.0439132	pcorr:0.0439132	-	#N/A	TRINITY_DN19641_c0_g1_i7
1379423	M:5	F:2	p:0.0439132	pcorr:0.0439132	-	#N/A	TRINITY_DN19641_c0_g1_i13
1379423	M:5	F:2	p:0.0439132	pcorr:0.0439132	-	#N/A	TRINITY_DN25253_c0_g1_i3
1379423	M:5	F:2	p:0.0439132	pcorr:0.0439132	-	#N/A	TRINITY_DN25253_c0_g1_i1
1379423	M:5	F:2	p:0.0439132	pcorr:0.0439132	-	#N/A	TRINITY_DN25253_c0_g1_i2
1382090	M:4	F:0	p:0.0138458	pcorr:0.0138458	-	#N/A	TRINITY_DN51181_c0_g1_i1
1382461	M:7	F:4	p:0.012518	pcorr:0.012518	-	#N/A	TRINITY_DN6273_c0_g2_i1
1382461	M:7	F:4	p:0.012518	pcorr:0.012518	-	#N/A	TRINITY_DN1056_c17_g1_i2
1382461	M:7	F:4	p:0.012518	pcorr:0.012518	-	#N/A	TRINITY_DN1056_c17_g1_i5
1382461	M:7	F:4	p:0.012518	pcorr:0.012518	-	#N/A	TRINITY_DN69086_c0_g1_i12
1382461	M:7	F:4	p:0.012518	pcorr:0.012518	-	#N/A	TRINITY_DN6273_c1_g1_i2
1383825	M:4	F:0	p:0.0138458	pcorr:0.0138458	-	#N/A	TRINITY_DN8403_c1_g1_i2
1383825	M:4	F:0	p:0.0138458	pcorr:0.0138458	-	#N/A	TRINITY_DN169303_c0_g1_i2
1383825	M:4	F:0	p:0.0138458	pcorr:0.0138458	-	#N/A	TRINITY_DN169303_c0_g1_i3
1383825	M:4	F:0	p:0.0138458	pcorr:0.0138458	-	#N/A	TRINITY_DN147214_c0_g1_i1
1383825	M:4	F:0	p:0.0138458	pcorr:0.0138458	-	#N/A	TRINITY_DN147214_c0_g1_i4
1383839	M:6	F:3	p:0.0267948	pcorr:0.0267948	-	Choren_v00_mik.OX359191.1G405.1	TRINITY_DN120840_c1_g1_i6
1383839	M:6	F:3	p:0.0267948	pcorr:0.0267948	-	Choren_v00_mik.OX359191.1G405.1	TRINITY_DN120840_c1_g1_i4
1384130	M:0	F:13	p:6.87148e-05	pcorr:6.87148e-05	PO21_NASVIRetrovirus-related Pol polyprotein from type-1 retrotransposable element R2 (Fragment) OS=Nasonia vitripennis OX=7425 PE=4 SV=2	Choren_v00_mik.OX359197.1G454.1	TRINITY_DN1825_c1_g1_i12
1384130	M:0	F:13	p:6.87148e-05	pcorr:6.87148e-05	PO21_NASVIRetrovirus-related Pol polyprotein from type-1 retrotransposable element R2 (Fragment) OS=Nasonia vitripennis OX=7425 PE=4 SV=2	Choren_v00_mik.OX359197.1G454.1	TRINITY_DN1825_c1_g1_i4
1384130	M:0	F:13	p:6.87148e-05	pcorr:6.87148e-05	PO21_NASVIRetrovirus-related Pol polyprotein from type-1 retrotransposable element R2 (Fragment) OS=Nasonia vitripennis OX=7425 PE=4 SV=2	Choren_v00_mik.OX359197.1G454.1	TRINITY_DN1825_c1_g1_i15
1384130	M:0	F:13	p:6.87148e-05	pcorr:6.87148e-05	PO21_NASVIRetrovirus-related Pol polyprotein from type-1 retrotransposable element R2 (Fragment) OS=Nasonia vitripennis OX=7425 PE=4 SV=2	Choren_v00_mik.OX359197.1G454.1	TRINITY_DN1825_c1_g1_i6
1384130	M:0	F:13	p:6.87148e-05	pcorr:6.87148e-05	-	Choren_v00_mik.OX359197.1G454.1	TRINITY_DN98110_c0_g3_i1
1385654	M:5	F:1	p:0.0140786	pcorr:0.0140786	-	#N/A	TRINITY_DN127752_c0_g1_i3
1385654	M:5	F:1	p:0.0140786	pcorr:0.0140786	-	#N/A	TRINITY_DN4423_c0_g1_i8
1385654	M:5	F:1	p:0.0140786	pcorr:0.0140786	MAT1_MARGLCDK-activating kinase assembly factor MAT1 OS=Marthasterias glacialis OX=7609 PE=1 SV=1	#N/A	TRINITY_DN4423_c0_g1_i1
1385654	M:5	F:1	p:0.0140786	pcorr:0.0140786	MAT1_HUMANCDK-activating kinase assembly factor MAT1 OS=Homo sapiens OX=9606 GN=MNAT1 PE=1 SV=1	#N/A	TRINITY_DN4423_c0_g1_i13
1385654	M:5	F:1	p:0.0140786	pcorr:0.0140786	MAT1_HUMANCDK-activating kinase assembly factor MAT1 OS=Homo sapiens OX=9606 GN=MNAT1 PE=1 SV=1	#N/A	TRINITY_DN4423_c0_g1_i2
1391239	M:4	F:0	p:0.0138458	pcorr:0.0138458	-	#N/A	TRINITY_DN12048_c0_g2_i11
1391239	M:4	F:0	p:0.0138458	pcorr:0.0138458	-	#N/A	TRINITY_DN12048_c0_g2_i4
1391239	M:4	F:0	p:0.0138458	pcorr:0.0138458	-	#N/A	TRINITY_DN12048_c0_g2_i12
1391239	M:4	F:0	p:0.0138458	pcorr:0.0138458	-	#N/A	TRINITY_DN12048_c0_g2_i6
1391239	M:4	F:0	p:0.0138458	pcorr:0.0138458	-	#N/A	TRINITY_DN12048_c0_g2_i10
1392470	M:6	F:2	p:0.00977293	pcorr:0.00977293	-	#N/A	TRINITY_DN44901_c1_g1_i1
1394463	M:0	F:13	p:6.87148e-05	pcorr:6.87148e-05	-	Choren_v00_mik.OX359191.1G476.1	TRINITY_DN9070_c0_g1_i11
1394463	M:0	F:13	p:6.87148e-05	pcorr:6.87148e-05	-	Choren_v00_mik.OX359191.1G476.1	TRINITY_DN9070_c0_g1_i6
1396420	M:7	F:5	p:0.0277373	pcorr:0.0277373	RYK_HUMANTyrosine-protein kinase RYK OS=Homo sapiens OX=9606 GN=RYK PE=1 SV=3	#N/A	TRINITY_DN1168_c0_g1_i4
1396420	M:7	F:5	p:0.0277373	pcorr:0.0277373	RYK_HUMANTyrosine-protein kinase RYK OS=Homo sapiens OX=9606 GN=RYK PE=1 SV=3	#N/A	TRINITY_DN1168_c0_g1_i8
1396420	M:7	F:5	p:0.0277373	pcorr:0.0277373	RYK_HUMANTyrosine-protein kinase RYK OS=Homo sapiens OX=9606 GN=RYK PE=1 SV=3	#N/A	TRINITY_DN1168_c0_g1_i19
1396420	M:7	F:5	p:0.0277373	pcorr:0.0277373	RYK_HUMANTyrosine-protein kinase RYK OS=Homo sapiens OX=9606 GN=RYK PE=1 SV=3	#N/A	TRINITY_DN1168_c0_g1_i25
1396420	M:7	F:5	p:0.0277373	pcorr:0.0277373	RYK_HUMANTyrosine-protein kinase RYK OS=Homo sapiens OX=9606 GN=RYK PE=1 SV=3	#N/A	TRINITY_DN1168_c0_g1_i17
1396674	M:0	F:8	p:0.0277373	pcorr:0.0277373	-	#N/A	TRINITY_DN142627_c0_g1_i1
1402667	M:4	F:0	p:0.0138458	pcorr:0.0138458	-	#N/A	TRINITY_DN78635_c0_g1_i3
1402667	M:4	F:0	p:0.0138458	pcorr:0.0138458	-	#N/A	TRINITY_DN78635_c0_g1_i1
1407618	M:0	F:13	p:6.87148e-05	pcorr:6.87148e-05	PPT1_BOVINPalmitoyl-protein thioesterase 1 OS=Bos taurus OX=9913 GN=PPT1 PE=1 SV=1	#N/A	TRINITY_DN1041_c0_g1_i12
1407618	M:0	F:13	p:6.87148e-05	pcorr:6.87148e-05	-	#N/A	TRINITY_DN41260_c1_g1_i2
1410863	M:5	F:2	p:0.0439132	pcorr:0.0439132	M3K9_HUMANMitogen-activated protein kinase kinase kinase 9 OS=Homo sapiens OX=9606 GN=MAP3K9 PE=1 SV=3	#N/A	TRINITY_DN2579_c0_g1_i12
1417188	M:6	F:3	p:0.0267948	pcorr:0.0267948	FUT11_ORYLAAlpha-(1,3)-fucosyltransferase 11 OS=Oryzias latipes OX=8090 GN=fut11 PE=2 SV=1	Choren_v00_mik.OX359194.1G78.1	TRINITY_DN12803_c0_g1_i5
1417188	M:6	F:3	p:0.0267948	pcorr:0.0267948	FUT11_ORYLAAlpha-(1,3)-fucosyltransferase 11 OS=Oryzias latipes OX=8090 GN=fut11 PE=2 SV=1	Choren_v00_mik.OX359194.1G78.1	TRINITY_DN12803_c0_g1_i1
1417188	M:6	F:3	p:0.0267948	pcorr:0.0267948	FUT11_ORYLAAlpha-(1,3)-fucosyltransferase 11 OS=Oryzias latipes OX=8090 GN=fut11 PE=2 SV=1	Choren_v00_mik.OX359194.1G78.1	TRINITY_DN12803_c0_g1_i3
1417188	M:6	F:3	p:0.0267948	pcorr:0.0267948	FUT10_XENLAAlpha-(1,3)-fucosyltransferase 10 OS=Xenopus laevis OX=8355 GN=fut10 PE=2 SV=2	Choren_v00_mik.OX359194.1G78.1	TRINITY_DN12803_c0_g1_i6
1417188	M:6	F:3	p:0.0267948	pcorr:0.0267948	FUT10_XENLAAlpha-(1,3)-fucosyltransferase 10 OS=Xenopus laevis OX=8355 GN=fut10 PE=2 SV=2	Choren_v00_mik.OX359194.1G78.1	TRINITY_DN12803_c0_g1_i4
1418146	M:5	F:2	p:0.0439132	pcorr:0.0439132	-	#N/A	TRINITY_DN175863_c0_g1_i2
1418146	M:5	F:2	p:0.0439132	pcorr:0.0439132	ARK1_CAEELAck-related non-receptor tyrosine kinase OS=Caenorhabditis elegans OX=6239 GN=ark-1 PE=2 SV=1	#N/A	TRINITY_DN1245_c0_g1_i19
1418146	M:5	F:2	p:0.0439132	pcorr:0.0439132	ARK1_CAEELAck-related non-receptor tyrosine kinase OS=Caenorhabditis elegans OX=6239 GN=ark-1 PE=2 SV=1	#N/A	TRINITY_DN1245_c0_g1_i19
1418146	M:5	F:2	p:0.0439132	pcorr:0.0439132	ABL1_MOUSETyrosine-protein kinase ABL1 OS=Mus musculus OX=10090 GN=Abl1 PE=1 SV=3	#N/A	TRINITY_DN1245_c0_g1_i22
1418146	M:5	F:2	p:0.0439132	pcorr:0.0439132	ABL1_MOUSETyrosine-protein kinase ABL1 OS=Mus musculus OX=10090 GN=Abl1 PE=1 SV=3	#N/A	TRINITY_DN1245_c0_g1_i22
1418146	M:5	F:2	p:0.0439132	pcorr:0.0439132	ABL1_MOUSETyrosine-protein kinase ABL1 OS=Mus musculus OX=10090 GN=Abl1 PE=1 SV=3	#N/A	TRINITY_DN1245_c0_g1_i1
1418146	M:5	F:2	p:0.0439132	pcorr:0.0439132	ABL1_MOUSETyrosine-protein kinase ABL1 OS=Mus musculus OX=10090 GN=Abl1 PE=1 SV=3	#N/A	TRINITY_DN1245_c0_g1_i1
1418146	M:5	F:2	p:0.0439132	pcorr:0.0439132	-	#N/A	TRINITY_DN1245_c0_g1_i14
1418146	M:5	F:2	p:0.0439132	pcorr:0.0439132	-	#N/A	TRINITY_DN1245_c0_g1_i14
1419834	M:0	F:10	p:0.00491056	pcorr:0.00491056	-	Choren_v00_mik.OX359191.1G489.1	TRINITY_DN9070_c0_g1_i11
1419834	M:0	F:10	p:0.00491056	pcorr:0.00491056	-	Choren_v00_mik.OX359191.1G489.1	TRINITY_DN9070_c0_g1_i6
1420290	M:5	F:1	p:0.0140786	pcorr:0.0140786	SYAC_BOMMOAlanine--tRNA ligase, cytoplasmic OS=Bombyx mori OX=7091 PE=1 SV=1	#N/A	TRINITY_DN3376_c0_g1_i1
1420290	M:5	F:1	p:0.0140786	pcorr:0.0140786	SYAC_BOMMOAlanine--tRNA ligase, cytoplasmic OS=Bombyx mori OX=7091 PE=1 SV=1	#N/A	TRINITY_DN3376_c0_g1_i6
1420290	M:5	F:1	p:0.0140786	pcorr:0.0140786	SYAC_BOMMOAlanine--tRNA ligase, cytoplasmic OS=Bombyx mori OX=7091 PE=1 SV=1	#N/A	TRINITY_DN3376_c0_g1_i16
1420290	M:5	F:1	p:0.0140786	pcorr:0.0140786	SYAC_BOMMOAlanine--tRNA ligase, cytoplasmic OS=Bombyx mori OX=7091 PE=1 SV=1	#N/A	TRINITY_DN3376_c0_g1_i3
1420290	M:5	F:1	p:0.0140786	pcorr:0.0140786	SYAC_BOMMOAlanine--tRNA ligase, cytoplasmic OS=Bombyx mori OX=7091 PE=1 SV=1	#N/A	TRINITY_DN3376_c0_g1_i15
1423105	M:5	F:1	p:0.0140786	pcorr:0.0140786	-	Choren_v00_mik.OX359197.1G452.1	TRINITY_DN2447_c0_g1_i16
1423105	M:5	F:1	p:0.0140786	pcorr:0.0140786	-	Choren_v00_mik.OX359197.1G452.1	TRINITY_DN2447_c0_g1_i13
1423105	M:5	F:1	p:0.0140786	pcorr:0.0140786	-	Choren_v00_mik.OX359197.1G452.1	TRINITY_DN2447_c0_g1_i12
1423105	M:5	F:1	p:0.0140786	pcorr:0.0140786	-	Choren_v00_mik.OX359197.1G452.1	TRINITY_DN2447_c0_g1_i1
1423105	M:5	F:1	p:0.0140786	pcorr:0.0140786	-	Choren_v00_mik.OX359197.1G452.1	TRINITY_DN2447_c0_g1_i5
1428933	M:6	F:1	p:0.00271931	pcorr:0.00271931	-	#N/A	TRINITY_DN2328_c0_g1_i3
1428933	M:6	F:1	p:0.00271931	pcorr:0.00271931	-	#N/A	TRINITY_DN2328_c0_g3_i1
1428933	M:6	F:1	p:0.00271931	pcorr:0.00271931	-	#N/A	TRINITY_DN1272_c1_g1_i10
1428933	M:6	F:1	p:0.00271931	pcorr:0.00271931	-	#N/A	TRINITY_DN1272_c1_g1_i3
1428933	M:6	F:1	p:0.00271931	pcorr:0.00271931	-	#N/A	TRINITY_DN2328_c0_g3_i2
1431239	M:5	F:1	p:0.0140786	pcorr:0.0140786	TRAF5_MOUSETNF receptor-associated factor 5 OS=Mus musculus OX=10090 GN=Traf5 PE=1 SV=1	Choren_v00_mik.OX359195.1G867.1	TRINITY_DN22202_c0_g1_i8
1431239	M:5	F:1	p:0.0140786	pcorr:0.0140786	TRAF5_MOUSETNF receptor-associated factor 5 OS=Mus musculus OX=10090 GN=Traf5 PE=1 SV=1	Choren_v00_mik.OX359195.1G867.1	TRINITY_DN8798_c0_g1_i14
1431239	M:5	F:1	p:0.0140786	pcorr:0.0140786	TRAF5_MOUSETNF receptor-associated factor 5 OS=Mus musculus OX=10090 GN=Traf5 PE=1 SV=1	Choren_v00_mik.OX359195.1G867.1	TRINITY_DN22202_c0_g1_i7
1431239	M:5	F:1	p:0.0140786	pcorr:0.0140786	TRAF5_MOUSETNF receptor-associated factor 5 OS=Mus musculus OX=10090 GN=Traf5 PE=1 SV=1	Choren_v00_mik.OX359195.1G867.1	TRINITY_DN22202_c0_g1_i4
1431239	M:5	F:1	p:0.0140786	pcorr:0.0140786	TRAF5_MOUSETNF receptor-associated factor 5 OS=Mus musculus OX=10090 GN=Traf5 PE=1 SV=1	Choren_v00_mik.OX359195.1G867.1	TRINITY_DN8798_c0_g1_i11
1433480	M:0	F:11	p:0.00159493	pcorr:0.00159493	PO21_NASVIRetrovirus-related Pol polyprotein from type-1 retrotransposable element R2 (Fragment) OS=Nasonia vitripennis OX=7425 PE=4 SV=2	Choren_v00_mik.OX359192.1G520.1	TRINITY_DN1825_c1_g1_i12
1433480	M:0	F:11	p:0.00159493	pcorr:0.00159493	PO21_NASVIRetrovirus-related Pol polyprotein from type-1 retrotransposable element R2 (Fragment) OS=Nasonia vitripennis OX=7425 PE=4 SV=2	Choren_v00_mik.OX359192.1G520.1	TRINITY_DN1825_c1_g1_i4
1433480	M:0	F:11	p:0.00159493	pcorr:0.00159493	PO21_NASVIRetrovirus-related Pol polyprotein from type-1 retrotransposable element R2 (Fragment) OS=Nasonia vitripennis OX=7425 PE=4 SV=2	Choren_v00_mik.OX359192.1G520.1	TRINITY_DN1825_c1_g1_i15
1433480	M:0	F:11	p:0.00159493	pcorr:0.00159493	PO21_NASVIRetrovirus-related Pol polyprotein from type-1 retrotransposable element R2 (Fragment) OS=Nasonia vitripennis OX=7425 PE=4 SV=2	Choren_v00_mik.OX359192.1G520.1	TRINITY_DN1825_c1_g1_i6
1433480	M:0	F:11	p:0.00159493	pcorr:0.00159493	-	Choren_v00_mik.OX359192.1G520.1	TRINITY_DN98110_c0_g3_i1
1434626	M:0	F:8	p:0.0277373	pcorr:0.0277373	-	#N/A	TRINITY_DN86344_c0_g1_i1
1434626	M:0	F:8	p:0.0277373	pcorr:0.0277373	PUB70_ORYSJU-box domain-containing protein 70 OS=Oryza sativa subsp. japonica OX=39947 GN=PUB70 PE=1 SV=1	#N/A	TRINITY_DN6075_c1_g1_i4
1434626	M:0	F:8	p:0.0277373	pcorr:0.0277373	PUB70_ORYSJU-box domain-containing protein 70 OS=Oryza sativa subsp. japonica OX=39947 GN=PUB70 PE=1 SV=1	#N/A	TRINITY_DN6075_c1_g1_i11
1436623	M:4	F:0	p:0.0138458	pcorr:0.0138458	2AAA_BOVINSerine/threonine-protein phosphatase 2A 65 kDa regulatory subunit A alpha isoform OS=Bos taurus OX=9913 GN=PPP2R1A PE=1 SV=1	Choren_v00_mik.OX359189.1G1530.1	TRINITY_DN3001_c0_g1_i2
1436623	M:4	F:0	p:0.0138458	pcorr:0.0138458	2AAA_BOVINSerine/threonine-protein phosphatase 2A 65 kDa regulatory subunit A alpha isoform OS=Bos taurus OX=9913 GN=PPP2R1A PE=1 SV=1	Choren_v00_mik.OX359189.1G1530.1	TRINITY_DN3001_c0_g1_i11
1436623	M:4	F:0	p:0.0138458	pcorr:0.0138458	YNG2_YARLIChromatin modification-related protein YNG2 OS=Yarrowia lipolytica (strain CLIB 122 / E 150) OX=284591 GN=YNG2 PE=3 SV=1	Choren_v00_mik.OX359189.1G1530.1	TRINITY_DN3001_c0_g1_i5
1436623	M:4	F:0	p:0.0138458	pcorr:0.0138458	-	Choren_v00_mik.OX359189.1G1530.1	TRINITY_DN96540_c0_g1_i2
1436623	M:4	F:0	p:0.0138458	pcorr:0.0138458	-	Choren_v00_mik.OX359189.1G1530.1	TRINITY_DN83424_c0_g1_i1
1437402	M:7	F:5	p:0.0277373	pcorr:0.0277373	MK15_XENLAMitogen-activated protein kinase 15 OS=Xenopus laevis OX=8355 GN=mapk15 PE=1 SV=1	#N/A	TRINITY_DN78_c0_g1_i20
1437402	M:7	F:5	p:0.0277373	pcorr:0.0277373	MK15_XENLAMitogen-activated protein kinase 15 OS=Xenopus laevis OX=8355 GN=mapk15 PE=1 SV=1	#N/A	TRINITY_DN78_c0_g1_i11
1437402	M:7	F:5	p:0.0277373	pcorr:0.0277373	MK15_XENLAMitogen-activated protein kinase 15 OS=Xenopus laevis OX=8355 GN=mapk15 PE=1 SV=1	#N/A	TRINITY_DN78_c0_g1_i2
1437402	M:7	F:5	p:0.0277373	pcorr:0.0277373	MK15_XENLAMitogen-activated protein kinase 15 OS=Xenopus laevis OX=8355 GN=mapk15 PE=1 SV=1	#N/A	TRINITY_DN78_c0_g1_i14
1437402	M:7	F:5	p:0.0277373	pcorr:0.0277373	MK15_XENLAMitogen-activated protein kinase 15 OS=Xenopus laevis OX=8355 GN=mapk15 PE=1 SV=1	#N/A	TRINITY_DN78_c0_g1_i1
1441671	M:5	F:1	p:0.0140786	pcorr:0.0140786	PIF1_BDEBAATP-dependent DNA helicase pif1 OS=Bdellovibrio bacteriovorus (strain ATCC 15356 / DSM 50701 / NCIMB 9529 / HD100) OX=264462 GN=pif1 PE=3 SV=1	Choren_v00_mik.OX359190.1G469.1	TRINITY_DN4782_c0_g2_i11
1441671	M:5	F:1	p:0.0140786	pcorr:0.0140786	PIF1_BDEBAATP-dependent DNA helicase pif1 OS=Bdellovibrio bacteriovorus (strain ATCC 15356 / DSM 50701 / NCIMB 9529 / HD100) OX=264462 GN=pif1 PE=3 SV=1	Choren_v00_mik.OX359190.1G469.1	TRINITY_DN4782_c0_g2_i3
1441671	M:5	F:1	p:0.0140786	pcorr:0.0140786	-	Choren_v00_mik.OX359190.1G469.1	TRINITY_DN37914_c0_g1_i1
1441671	M:5	F:1	p:0.0140786	pcorr:0.0140786	-	Choren_v00_mik.OX359190.1G469.1	TRINITY_DN37914_c0_g1_i2
1442682	M:0	F:12	p:0.000399051	pcorr:0.000399051	-	Choren_v00_mik.OX359199.1G307.1	TRINITY_DN59868_c0_g1_i1
1442682	M:0	F:12	p:0.000399051	pcorr:0.000399051	CENPE_HUMANCentromere-associated protein E OS=Homo sapiens OX=9606 GN=CENPE PE=1 SV=2	Choren_v00_mik.OX359199.1G307.1	TRINITY_DN3658_c0_g1_i6
1442682	M:0	F:12	p:0.000399051	pcorr:0.000399051	CENPE_HUMANCentromere-associated protein E OS=Homo sapiens OX=9606 GN=CENPE PE=1 SV=2	Choren_v00_mik.OX359199.1G307.1	TRINITY_DN3658_c0_g1_i10
1442682	M:0	F:12	p:0.000399051	pcorr:0.000399051	CENPE_HUMANCentromere-associated protein E OS=Homo sapiens OX=9606 GN=CENPE PE=1 SV=2	Choren_v00_mik.OX359199.1G307.1	TRINITY_DN3658_c0_g1_i11
1442682	M:0	F:12	p:0.000399051	pcorr:0.000399051	CENPE_HUMANCentromere-associated protein E OS=Homo sapiens OX=9606 GN=CENPE PE=1 SV=2	Choren_v00_mik.OX359199.1G307.1	TRINITY_DN3658_c0_g1_i12
1444060	M:4	F:0	p:0.0138458	pcorr:0.0138458	-	#N/A	TRINITY_DN65_c5_g1_i1
1444060	M:4	F:0	p:0.0138458	pcorr:0.0138458	-	#N/A	TRINITY_DN65_c5_g1_i4
1444060	M:4	F:0	p:0.0138458	pcorr:0.0138458	-	#N/A	TRINITY_DN65_c5_g1_i3
1444060	M:4	F:0	p:0.0138458	pcorr:0.0138458	-	#N/A	TRINITY_DN65_c5_g1_i2
1444060	M:4	F:0	p:0.0138458	pcorr:0.0138458	-	#N/A	TRINITY_DN8068_c1_g1_i2
1450109	M:0	F:13	p:6.87148e-05	pcorr:6.87148e-05	-	Choren_v00_mik.OX359192.1G235.1	TRINITY_DN2928_c2_g1_i3
1450109	M:0	F:13	p:6.87148e-05	pcorr:6.87148e-05	-	Choren_v00_mik.OX359192.1G235.1	TRINITY_DN2928_c2_g1_i1
1450109	M:0	F:13	p:6.87148e-05	pcorr:6.87148e-05	-	Choren_v00_mik.OX359192.1G235.1	TRINITY_DN2928_c2_g1_i2
1450109	M:0	F:13	p:6.87148e-05	pcorr:6.87148e-05	-	Choren_v00_mik.OX359192.1G235.1	TRINITY_DN79240_c1_g1_i2
1450109	M:0	F:13	p:6.87148e-05	pcorr:6.87148e-05	-	Choren_v00_mik.OX359192.1G235.1	TRINITY_DN15232_c0_g1_i2
1450395	M:5	F:1	p:0.0140786	pcorr:0.0140786	-	Choren_v00_mik.OX359195.1G773.1	TRINITY_DN1587_c0_g1_i11
1450395	M:5	F:1	p:0.0140786	pcorr:0.0140786	-	Choren_v00_mik.OX359195.1G773.1	TRINITY_DN1587_c0_g1_i7
1450395	M:5	F:1	p:0.0140786	pcorr:0.0140786	-	Choren_v00_mik.OX359195.1G773.1	TRINITY_DN1587_c0_g1_i12
1450395	M:5	F:1	p:0.0140786	pcorr:0.0140786	-	Choren_v00_mik.OX359195.1G773.1	TRINITY_DN1587_c0_g1_i2
1450395	M:5	F:1	p:0.0140786	pcorr:0.0140786	-	Choren_v00_mik.OX359195.1G773.1	TRINITY_DN1587_c0_g1_i9
1451312	M:7	F:5	p:0.0277373	pcorr:0.0277373	Y4HO_SINFNUncharacterized protein y4hO OS=Sinorhizobium fredii (strain NBRC 101917 / NGR234) OX=394 GN=NGR_a03350 PE=3 SV=2	#N/A	TRINITY_DN59203_c0_g3_i1
1453135	M:7	F:4	p:0.012518	pcorr:0.012518	-	#N/A	TRINITY_DN53274_c0_g1_i1
1453135	M:7	F:4	p:0.012518	pcorr:0.012518	-	#N/A	TRINITY_DN53274_c0_g1_i4
1457273	M:5	F:2	p:0.0439132	pcorr:0.0439132	-	#N/A	TRINITY_DN2992_c2_g1_i1
1457273	M:5	F:2	p:0.0439132	pcorr:0.0439132	-	#N/A	TRINITY_DN5924_c0_g1_i9
1457273	M:5	F:2	p:0.0439132	pcorr:0.0439132	-	#N/A	TRINITY_DN2992_c0_g1_i1
1457273	M:5	F:2	p:0.0439132	pcorr:0.0439132	-	#N/A	TRINITY_DN5924_c0_g1_i1
1457273	M:5	F:2	p:0.0439132	pcorr:0.0439132	-	#N/A	TRINITY_DN5924_c0_g1_i6
1457731	M:0	F:10	p:0.00491056	pcorr:0.00491056	PO21_NASVIRetrovirus-related Pol polyprotein from type-1 retrotransposable element R2 (Fragment) OS=Nasonia vitripennis OX=7425 PE=4 SV=2	Choren_v00_mik.OX359191.1G405.1	TRINITY_DN1825_c1_g1_i12
1457731	M:0	F:10	p:0.00491056	pcorr:0.00491056	PO21_NASVIRetrovirus-related Pol polyprotein from type-1 retrotransposable element R2 (Fragment) OS=Nasonia vitripennis OX=7425 PE=4 SV=2	Choren_v00_mik.OX359191.1G405.1	TRINITY_DN1825_c1_g1_i4
1457731	M:0	F:10	p:0.00491056	pcorr:0.00491056	PO21_NASVIRetrovirus-related Pol polyprotein from type-1 retrotransposable element R2 (Fragment) OS=Nasonia vitripennis OX=7425 PE=4 SV=2	Choren_v00_mik.OX359191.1G405.1	TRINITY_DN1825_c1_g1_i15
1457731	M:0	F:10	p:0.00491056	pcorr:0.00491056	PO21_NASVIRetrovirus-related Pol polyprotein from type-1 retrotransposable element R2 (Fragment) OS=Nasonia vitripennis OX=7425 PE=4 SV=2	Choren_v00_mik.OX359191.1G405.1	TRINITY_DN1825_c1_g1_i6
1457731	M:0	F:10	p:0.00491056	pcorr:0.00491056	-	Choren_v00_mik.OX359191.1G405.1	TRINITY_DN26464_c0_g1_i5
1461411	M:7	F:4	p:0.012518	pcorr:0.012518	-	#N/A	TRINITY_DN4565_c7_g1_i1
1461411	M:7	F:4	p:0.012518	pcorr:0.012518	-	#N/A	TRINITY_DN17736_c2_g2_i1
1463424	M:6	F:3	p:0.0267948	pcorr:0.0267948	-	#N/A	TRINITY_DN21265_c0_g2_i3
1463424	M:6	F:3	p:0.0267948	pcorr:0.0267948	-	#N/A	TRINITY_DN21265_c0_g2_i4
1464555	M:5	F:1	p:0.0140786	pcorr:0.0140786	NOM1_HUMANNucleolar MIF4G domain-containing protein 1 OS=Homo sapiens OX=9606 GN=NOM1 PE=1 SV=1	#N/A	TRINITY_DN3580_c0_g2_i3
1464555	M:5	F:1	p:0.0140786	pcorr:0.0140786	NOM1_HUMANNucleolar MIF4G domain-containing protein 1 OS=Homo sapiens OX=9606 GN=NOM1 PE=1 SV=1	#N/A	TRINITY_DN3580_c0_g2_i5
1464555	M:5	F:1	p:0.0140786	pcorr:0.0140786	-	#N/A	TRINITY_DN21182_c0_g1_i4
1464555	M:5	F:1	p:0.0140786	pcorr:0.0140786	-	#N/A	TRINITY_DN21182_c0_g1_i1
1464555	M:5	F:1	p:0.0140786	pcorr:0.0140786	-	#N/A	TRINITY_DN21182_c0_g1_i3
1464618	M:6	F:2	p:0.00977293	pcorr:0.00977293	-	#N/A	TRINITY_DN7613_c0_g2_i3
1464618	M:6	F:2	p:0.00977293	pcorr:0.00977293	-	#N/A	TRINITY_DN7613_c0_g2_i2
1464618	M:6	F:2	p:0.00977293	pcorr:0.00977293	-	#N/A	TRINITY_DN7613_c0_g2_i1
1464618	M:6	F:2	p:0.00977293	pcorr:0.00977293	-	#N/A	TRINITY_DN7613_c0_g2_i4
1464618	M:6	F:2	p:0.00977293	pcorr:0.00977293	-	#N/A	TRINITY_DN3408_c10_g1_i3
1465551	M:0	F:10	p:0.00491056	pcorr:0.00491056	PO21_NASVIRetrovirus-related Pol polyprotein from type-1 retrotransposable element R2 (Fragment) OS=Nasonia vitripennis OX=7425 PE=4 SV=2	Choren_v00_mik.OX359192.1G520.1	TRINITY_DN1825_c1_g1_i12
1465551	M:0	F:10	p:0.00491056	pcorr:0.00491056	PO21_NASVIRetrovirus-related Pol polyprotein from type-1 retrotransposable element R2 (Fragment) OS=Nasonia vitripennis OX=7425 PE=4 SV=2	Choren_v00_mik.OX359192.1G520.1	TRINITY_DN1825_c1_g1_i4
1465551	M:0	F:10	p:0.00491056	pcorr:0.00491056	PO21_NASVIRetrovirus-related Pol polyprotein from type-1 retrotransposable element R2 (Fragment) OS=Nasonia vitripennis OX=7425 PE=4 SV=2	Choren_v00_mik.OX359192.1G520.1	TRINITY_DN1825_c1_g1_i15
1465551	M:0	F:10	p:0.00491056	pcorr:0.00491056	PO21_NASVIRetrovirus-related Pol polyprotein from type-1 retrotransposable element R2 (Fragment) OS=Nasonia vitripennis OX=7425 PE=4 SV=2	Choren_v00_mik.OX359192.1G520.1	TRINITY_DN1825_c1_g1_i6
1465551	M:0	F:10	p:0.00491056	pcorr:0.00491056	-	Choren_v00_mik.OX359192.1G520.1	TRINITY_DN10660_c0_g1_i11
1480904	M:6	F:2	p:0.00977293	pcorr:0.00977293	-	#N/A	TRINITY_DN7613_c0_g2_i3
1480904	M:6	F:2	p:0.00977293	pcorr:0.00977293	-	#N/A	TRINITY_DN7613_c0_g2_i2
1480904	M:6	F:2	p:0.00977293	pcorr:0.00977293	-	#N/A	TRINITY_DN7613_c0_g2_i1
1480904	M:6	F:2	p:0.00977293	pcorr:0.00977293	-	#N/A	TRINITY_DN7613_c0_g2_i4
1480904	M:6	F:2	p:0.00977293	pcorr:0.00977293	-	#N/A	TRINITY_DN3408_c10_g1_i3
1494032	M:6	F:1	p:0.00271931	pcorr:0.00271931	-	Choren_v00_mik.OX359189.1G889.1	TRINITY_DN112729_c0_g1_i1
1494032	M:6	F:1	p:0.00271931	pcorr:0.00271931	TRAF3_MOUSETNF receptor-associated factor 3 OS=Mus musculus OX=10090 GN=Traf3 PE=1 SV=2	Choren_v00_mik.OX359189.1G889.1	TRINITY_DN1354_c1_g1_i12
1494032	M:6	F:1	p:0.00271931	pcorr:0.00271931	-	Choren_v00_mik.OX359189.1G889.1	TRINITY_DN1354_c1_g1_i8
1494032	M:6	F:1	p:0.00271931	pcorr:0.00271931	-	Choren_v00_mik.OX359189.1G889.1	TRINITY_DN1354_c1_g1_i1
1494032	M:6	F:1	p:0.00271931	pcorr:0.00271931	-	Choren_v00_mik.OX359189.1G889.1	TRINITY_DN1354_c1_g1_i3
1495392	M:4	F:0	p:0.0138458	pcorr:0.0138458	-	Choren_v00_mik.OX359195.1G21.1	TRINITY_DN21844_c0_g1_i6
1495392	M:4	F:0	p:0.0138458	pcorr:0.0138458	-	Choren_v00_mik.OX359195.1G21.1	TRINITY_DN21844_c0_g1_i1
1495392	M:4	F:0	p:0.0138458	pcorr:0.0138458	-	Choren_v00_mik.OX359195.1G21.1	TRINITY_DN48438_c0_g1_i1
1495392	M:4	F:0	p:0.0138458	pcorr:0.0138458	-	Choren_v00_mik.OX359195.1G21.1	TRINITY_DN48438_c0_g1_i2
1495392	M:4	F:0	p:0.0138458	pcorr:0.0138458	-	Choren_v00_mik.OX359195.1G21.1	TRINITY_DN1009_c0_g1_i8
1495673	M:2	F:12	p:0.0140786	pcorr:0.0140786	-	Choren_v00_mik.OX359191.1G619.1	TRINITY_DN310_c0_g1_i19
1495673	M:2	F:12	p:0.0140786	pcorr:0.0140786	-	Choren_v00_mik.OX359191.1G619.1	TRINITY_DN310_c0_g1_i3
1495673	M:2	F:12	p:0.0140786	pcorr:0.0140786	-	Choren_v00_mik.OX359191.1G619.1	TRINITY_DN310_c0_g1_i9
1495673	M:2	F:12	p:0.0140786	pcorr:0.0140786	-	Choren_v00_mik.OX359191.1G619.1	TRINITY_DN310_c0_g1_i6
1495673	M:2	F:12	p:0.0140786	pcorr:0.0140786	-	Choren_v00_mik.OX359191.1G619.1	TRINITY_DN310_c0_g1_i14
1497827	M:7	F:5	p:0.0277373	pcorr:0.0277373	-	#N/A	TRINITY_DN4551_c0_g3_i2
1498029	M:5	F:2	p:0.0439132	pcorr:0.0439132	DGLB_HUMANDiacylglycerol lipase-beta OS=Homo sapiens OX=9606 GN=DAGLB PE=1 SV=2	Choren_v00_mik.OX359193.1G1152.1	TRINITY_DN4166_c0_g1_i2
1499709	M:1	F:13	p:0.000504657	pcorr:0.000504657	LORF2_HUMANLINE-1 retrotransposable element ORF2 protein OS=Homo sapiens OX=9606 PE=1 SV=1	Choren_v00_mik.OX359191.1G545.1	TRINITY_DN2643_c0_g2_i9
1499709	M:1	F:13	p:0.000504657	pcorr:0.000504657	LORF2_HUMANLINE-1 retrotransposable element ORF2 protein OS=Homo sapiens OX=9606 PE=1 SV=1	Choren_v00_mik.OX359191.1G545.1	TRINITY_DN2643_c0_g2_i1
1499709	M:1	F:13	p:0.000504657	pcorr:0.000504657	LORF2_HUMANLINE-1 retrotransposable element ORF2 protein OS=Homo sapiens OX=9606 PE=1 SV=1	Choren_v00_mik.OX359191.1G545.1	TRINITY_DN2643_c0_g2_i2
1499709	M:1	F:13	p:0.000504657	pcorr:0.000504657	CFDP2_BOVINCraniofacial development protein 2 OS=Bos taurus OX=9913 GN=CFDP2 PE=1 SV=2	Choren_v00_mik.OX359191.1G545.1	TRINITY_DN2643_c0_g2_i11
1499709	M:1	F:13	p:0.000504657	pcorr:0.000504657	CFDP2_BOVINCraniofacial development protein 2 OS=Bos taurus OX=9913 GN=CFDP2 PE=1 SV=2	Choren_v00_mik.OX359191.1G545.1	TRINITY_DN2643_c0_g2_i12
1500176	M:5	F:1	p:0.0140786	pcorr:0.0140786	-	#N/A	TRINITY_DN12336_c1_g1_i2
1500176	M:5	F:1	p:0.0140786	pcorr:0.0140786	-	#N/A	TRINITY_DN12336_c1_g1_i1
1500176	M:5	F:1	p:0.0140786	pcorr:0.0140786	-	#N/A	TRINITY_DN82791_c0_g3_i1
1500176	M:5	F:1	p:0.0140786	pcorr:0.0140786	-	#N/A	TRINITY_DN23881_c2_g1_i1
1500176	M:5	F:1	p:0.0140786	pcorr:0.0140786	-	#N/A	TRINITY_DN104850_c0_g1_i1
1501367	M:5	F:2	p:0.0439132	pcorr:0.0439132	-	Choren_v00_mik.OX359192.1G235.1	TRINITY_DN65_c0_g1_i8
1501367	M:5	F:2	p:0.0439132	pcorr:0.0439132	-	Choren_v00_mik.OX359192.1G235.1	TRINITY_DN26574_c0_g1_i4
1501367	M:5	F:2	p:0.0439132	pcorr:0.0439132	-	Choren_v00_mik.OX359192.1G235.1	TRINITY_DN5364_c0_g1_i14
1501367	M:5	F:2	p:0.0439132	pcorr:0.0439132	-	Choren_v00_mik.OX359192.1G235.1	TRINITY_DN65_c0_g1_i3
1501367	M:5	F:2	p:0.0439132	pcorr:0.0439132	-	Choren_v00_mik.OX359192.1G235.1	TRINITY_DN65_c0_g1_i4
1505761	M:7	F:5	p:0.0277373	pcorr:0.0277373	-	#N/A	TRINITY_DN5171_c0_g1_i1
1505761	M:7	F:5	p:0.0277373	pcorr:0.0277373	-	#N/A	TRINITY_DN2099_c0_g1_i9
1505761	M:7	F:5	p:0.0277373	pcorr:0.0277373	VPS8_MOUSEVacuolar protein sorting-associated protein 8 homolog OS=Mus musculus OX=10090 GN=Vps8 PE=1 SV=1	#N/A	TRINITY_DN2099_c0_g1_i11
1505761	M:7	F:5	p:0.0277373	pcorr:0.0277373	-	#N/A	TRINITY_DN2099_c0_g1_i14
1505761	M:7	F:5	p:0.0277373	pcorr:0.0277373	-	#N/A	TRINITY_DN2099_c0_g1_i17
1511236	M:7	F:4	p:0.012518	pcorr:0.012518	MRFL_MOUSEMyelin regulatory factor-like protein OS=Mus musculus OX=10090 GN=Myrfl PE=2 SV=1	#N/A	TRINITY_DN1974_c2_g1_i14
1511236	M:7	F:4	p:0.012518	pcorr:0.012518	MRFL_MOUSEMyelin regulatory factor-like protein OS=Mus musculus OX=10090 GN=Myrfl PE=2 SV=1	#N/A	TRINITY_DN1974_c2_g1_i4
1511236	M:7	F:4	p:0.012518	pcorr:0.012518	MRFL_MOUSEMyelin regulatory factor-like protein OS=Mus musculus OX=10090 GN=Myrfl PE=2 SV=1	#N/A	TRINITY_DN1974_c2_g1_i3
1511236	M:7	F:4	p:0.012518	pcorr:0.012518	MRFL_MOUSEMyelin regulatory factor-like protein OS=Mus musculus OX=10090 GN=Myrfl PE=2 SV=1	#N/A	TRINITY_DN1974_c2_g1_i2
1511236	M:7	F:4	p:0.012518	pcorr:0.012518	MRFL_MOUSEMyelin regulatory factor-like protein OS=Mus musculus OX=10090 GN=Myrfl PE=2 SV=1	#N/A	TRINITY_DN1974_c2_g1_i6
1512381	M:0	F:10	p:0.00491056	pcorr:0.00491056	-	#N/A	TRINITY_DN8983_c0_g1_i1
1517964	M:0	F:13	p:6.87148e-05	pcorr:6.87148e-05	-	#N/A	TRINITY_DN7763_c0_g1_i1
1517964	M:0	F:13	p:6.87148e-05	pcorr:6.87148e-05	-	#N/A	TRINITY_DN7763_c0_g1_i2
1517964	M:0	F:13	p:6.87148e-05	pcorr:6.87148e-05	-	#N/A	TRINITY_DN7763_c0_g1_i4
1517964	M:0	F:13	p:6.87148e-05	pcorr:6.87148e-05	-	#N/A	TRINITY_DN76851_c1_g1_i1
1517964	M:0	F:13	p:6.87148e-05	pcorr:6.87148e-05	-	#N/A	TRINITY_DN76851_c1_g1_i2
1520211	M:5	F:2	p:0.0439132	pcorr:0.0439132	-	Choren_v00_mik.OX359199.1G995.1	TRINITY_DN64_c0_g1_i4
1520211	M:5	F:2	p:0.0439132	pcorr:0.0439132	-	Choren_v00_mik.OX359199.1G995.1	TRINITY_DN64_c0_g1_i11
1520211	M:5	F:2	p:0.0439132	pcorr:0.0439132	LDB2_MOUSELIM domain-binding protein 2 OS=Mus musculus OX=10090 GN=Ldb2 PE=1 SV=2	Choren_v00_mik.OX359199.1G995.1	TRINITY_DN64_c0_g1_i9
1520211	M:5	F:2	p:0.0439132	pcorr:0.0439132	LDB2_CHICKLIM domain-binding protein 2 OS=Gallus gallus OX=9031 GN=LDB2 PE=2 SV=1	Choren_v00_mik.OX359199.1G995.1	TRINITY_DN64_c0_g1_i1
1520211	M:5	F:2	p:0.0439132	pcorr:0.0439132	-	Choren_v00_mik.OX359199.1G995.1	TRINITY_DN64_c0_g1_i2
1522785	M:5	F:2	p:0.0439132	pcorr:0.0439132	-	#N/A	TRINITY_DN3695_c0_g1_i9
1522785	M:5	F:2	p:0.0439132	pcorr:0.0439132	-	#N/A	TRINITY_DN3695_c0_g1_i5
1526799	M:4	F:0	p:0.0138458	pcorr:0.0138458	-	#N/A	TRINITY_DN892_c3_g1_i3
1526799	M:4	F:0	p:0.0138458	pcorr:0.0138458	-	#N/A	TRINITY_DN892_c3_g1_i2
1526799	M:4	F:0	p:0.0138458	pcorr:0.0138458	-	#N/A	TRINITY_DN15483_c1_g1_i7
1526799	M:4	F:0	p:0.0138458	pcorr:0.0138458	-	#N/A	TRINITY_DN15483_c1_g1_i2
1526799	M:4	F:0	p:0.0138458	pcorr:0.0138458	-	#N/A	TRINITY_DN13609_c0_g2_i1
1533387	M:6	F:3	p:0.0267948	pcorr:0.0267948	-	#N/A	TRINITY_DN67665_c0_g1_i4
1533387	M:6	F:3	p:0.0267948	pcorr:0.0267948	-	#N/A	TRINITY_DN67665_c0_g1_i2
1538597	M:6	F:3	p:0.0267948	pcorr:0.0267948	-	#N/A	TRINITY_DN5774_c2_g1_i8
1538597	M:6	F:3	p:0.0267948	pcorr:0.0267948	IGDC3_HUMANImmunoglobulin superfamily DCC subclass member 3 OS=Homo sapiens OX=9606 GN=IGDCC3 PE=2 SV=2	#N/A	TRINITY_DN5774_c2_g1_i15
1538597	M:6	F:3	p:0.0267948	pcorr:0.0267948	IGDC3_HUMANImmunoglobulin superfamily DCC subclass member 3 OS=Homo sapiens OX=9606 GN=IGDCC3 PE=2 SV=2	#N/A	TRINITY_DN5774_c2_g1_i11
1538597	M:6	F:3	p:0.0267948	pcorr:0.0267948	-	#N/A	TRINITY_DN5774_c2_g1_i13
1538597	M:6	F:3	p:0.0267948	pcorr:0.0267948	-	#N/A	TRINITY_DN5774_c2_g1_i17
1545949	M:7	F:5	p:0.0277373	pcorr:0.0277373	-	#N/A	TRINITY_DN602_c0_g1_i10
1545949	M:7	F:5	p:0.0277373	pcorr:0.0277373	-	#N/A	TRINITY_DN602_c0_g1_i6
1545949	M:7	F:5	p:0.0277373	pcorr:0.0277373	-	#N/A	TRINITY_DN602_c0_g1_i7
1545949	M:7	F:5	p:0.0277373	pcorr:0.0277373	-	#N/A	TRINITY_DN602_c0_g1_i8
1545949	M:7	F:5	p:0.0277373	pcorr:0.0277373	-	#N/A	TRINITY_DN14918_c0_g1_i7
1546257	M:5	F:2	p:0.0439132	pcorr:0.0439132	-	#N/A	TRINITY_DN59883_c0_g1_i8
1546257	M:5	F:2	p:0.0439132	pcorr:0.0439132	-	#N/A	TRINITY_DN59883_c0_g1_i7
1546257	M:5	F:2	p:0.0439132	pcorr:0.0439132	-	#N/A	TRINITY_DN59883_c0_g1_i6
1546257	M:5	F:2	p:0.0439132	pcorr:0.0439132	-	#N/A	TRINITY_DN59883_c0_g1_i2
1546257	M:5	F:2	p:0.0439132	pcorr:0.0439132	-	#N/A	TRINITY_DN59883_c0_g1_i1
1562001	M:4	F:0	p:0.0138458	pcorr:0.0138458	-	#N/A	TRINITY_DN1828_c7_g1_i3
1562001	M:4	F:0	p:0.0138458	pcorr:0.0138458	-	#N/A	TRINITY_DN1828_c7_g1_i4
1562001	M:4	F:0	p:0.0138458	pcorr:0.0138458	-	#N/A	TRINITY_DN1828_c7_g1_i6
1562001	M:4	F:0	p:0.0138458	pcorr:0.0138458	-	#N/A	TRINITY_DN1828_c7_g1_i7
1563042	M:4	F:0	p:0.0138458	pcorr:0.0138458	-	#N/A	TRINITY_DN78040_c1_g1_i3
1563042	M:4	F:0	p:0.0138458	pcorr:0.0138458	-	#N/A	TRINITY_DN78040_c1_g1_i2
1563042	M:4	F:0	p:0.0138458	pcorr:0.0138458	-	#N/A	TRINITY_DN1829_c2_g1_i14
1563042	M:4	F:0	p:0.0138458	pcorr:0.0138458	-	#N/A	TRINITY_DN1829_c2_g1_i19
1563042	M:4	F:0	p:0.0138458	pcorr:0.0138458	-	#N/A	TRINITY_DN1829_c2_g1_i4
1568879	M:0	F:8	p:0.0277373	pcorr:0.0277373	-	Choren_v00_mik.OX359200.1G755.1	TRINITY_DN1740_c0_g2_i2
1568879	M:0	F:8	p:0.0277373	pcorr:0.0277373	-	Choren_v00_mik.OX359200.1G755.1	TRINITY_DN48486_c0_g1_i1
1568879	M:0	F:8	p:0.0277373	pcorr:0.0277373	-	Choren_v00_mik.OX359200.1G755.1	TRINITY_DN48486_c0_g1_i2
1568879	M:0	F:8	p:0.0277373	pcorr:0.0277373	-	Choren_v00_mik.OX359200.1G755.1	TRINITY_DN48486_c0_g1_i3
1568879	M:0	F:8	p:0.0277373	pcorr:0.0277373	-	Choren_v00_mik.OX359200.1G755.1	TRINITY_DN5339_c0_g2_i1
1575018	M:5	F:2	p:0.0439132	pcorr:0.0439132	-	Choren_v00_mik.OX359190.1G922.1	TRINITY_DN28986_c0_g1_i6
1575018	M:5	F:2	p:0.0439132	pcorr:0.0439132	BOP1_XENTRRibosome biogenesis protein bop1 OS=Xenopus tropicalis OX=8364 GN=bop1 PE=2 SV=1	Choren_v00_mik.OX359190.1G922.1	TRINITY_DN3728_c0_g1_i18
1575018	M:5	F:2	p:0.0439132	pcorr:0.0439132	BOP1_XENTRRibosome biogenesis protein bop1 OS=Xenopus tropicalis OX=8364 GN=bop1 PE=2 SV=1	Choren_v00_mik.OX359190.1G922.1	TRINITY_DN3728_c0_g1_i10
1575018	M:5	F:2	p:0.0439132	pcorr:0.0439132	BOP1_XENTRRibosome biogenesis protein bop1 OS=Xenopus tropicalis OX=8364 GN=bop1 PE=2 SV=1	Choren_v00_mik.OX359190.1G922.1	TRINITY_DN3728_c0_g1_i13
1575018	M:5	F:2	p:0.0439132	pcorr:0.0439132	-	Choren_v00_mik.OX359190.1G922.1	TRINITY_DN3728_c0_g1_i19
1584008	M:0	F:13	p:6.87148e-05	pcorr:6.87148e-05	-	#N/A	TRINITY_DN666_c0_g1_i2
1584008	M:0	F:13	p:6.87148e-05	pcorr:6.87148e-05	-	#N/A	TRINITY_DN666_c0_g1_i9
1584008	M:0	F:13	p:6.87148e-05	pcorr:6.87148e-05	-	#N/A	TRINITY_DN666_c0_g1_i20
1584008	M:0	F:13	p:6.87148e-05	pcorr:6.87148e-05	-	#N/A	TRINITY_DN666_c0_g1_i23
1584008	M:0	F:13	p:6.87148e-05	pcorr:6.87148e-05	-	#N/A	TRINITY_DN666_c0_g1_i15
1585186	M:7	F:5	p:0.0277373	pcorr:0.0277373	TTC8_CAEELTetratricopeptide repeat protein 8 OS=Caenorhabditis elegans OX=6239 GN=bbs-8 PE=2 SV=2	#N/A	TRINITY_DN3139_c0_g1_i9
1585186	M:7	F:5	p:0.0277373	pcorr:0.0277373	TTC8_CAEELTetratricopeptide repeat protein 8 OS=Caenorhabditis elegans OX=6239 GN=bbs-8 PE=2 SV=2	#N/A	TRINITY_DN3139_c0_g1_i12
1585186	M:7	F:5	p:0.0277373	pcorr:0.0277373	TTC8_CAEELTetratricopeptide repeat protein 8 OS=Caenorhabditis elegans OX=6239 GN=bbs-8 PE=2 SV=2	#N/A	TRINITY_DN3139_c0_g1_i4
1585219	M:5	F:2	p:0.0439132	pcorr:0.0439132	-	Choren_v00_mik.OX359189.1G1494.1	TRINITY_DN6013_c0_g1_i8
1585219	M:5	F:2	p:0.0439132	pcorr:0.0439132	-	Choren_v00_mik.OX359189.1G1494.1	TRINITY_DN6013_c0_g1_i16
1585219	M:5	F:2	p:0.0439132	pcorr:0.0439132	-	Choren_v00_mik.OX359189.1G1494.1	TRINITY_DN65825_c0_g1_i1
1585219	M:5	F:2	p:0.0439132	pcorr:0.0439132	-	Choren_v00_mik.OX359189.1G1494.1	TRINITY_DN65825_c0_g1_i2
1585219	M:5	F:2	p:0.0439132	pcorr:0.0439132	-	Choren_v00_mik.OX359189.1G1494.1	TRINITY_DN31868_c0_g1_i4
1588414	M:0	F:13	p:6.87148e-05	pcorr:6.87148e-05	PO21_NASVIRetrovirus-related Pol polyprotein from type-1 retrotransposable element R2 (Fragment) OS=Nasonia vitripennis OX=7425 PE=4 SV=2	Choren_v00_mik.OX359194.1G969.1	TRINITY_DN1825_c1_g1_i12
1588414	M:0	F:13	p:6.87148e-05	pcorr:6.87148e-05	PO21_NASVIRetrovirus-related Pol polyprotein from type-1 retrotransposable element R2 (Fragment) OS=Nasonia vitripennis OX=7425 PE=4 SV=2	Choren_v00_mik.OX359194.1G969.1	TRINITY_DN1825_c1_g1_i4
1588414	M:0	F:13	p:6.87148e-05	pcorr:6.87148e-05	PO21_NASVIRetrovirus-related Pol polyprotein from type-1 retrotransposable element R2 (Fragment) OS=Nasonia vitripennis OX=7425 PE=4 SV=2	Choren_v00_mik.OX359194.1G969.1	TRINITY_DN1825_c1_g1_i15
1588414	M:0	F:13	p:6.87148e-05	pcorr:6.87148e-05	PO21_NASVIRetrovirus-related Pol polyprotein from type-1 retrotransposable element R2 (Fragment) OS=Nasonia vitripennis OX=7425 PE=4 SV=2	Choren_v00_mik.OX359194.1G969.1	TRINITY_DN1825_c1_g1_i6
1588414	M:0	F:13	p:6.87148e-05	pcorr:6.87148e-05	-	Choren_v00_mik.OX359194.1G969.1	TRINITY_DN98110_c0_g3_i1
1589581	M:5	F:2	p:0.0439132	pcorr:0.0439132	-	#N/A	TRINITY_DN37990_c0_g1_i1
1589581	M:5	F:2	p:0.0439132	pcorr:0.0439132	-	#N/A	TRINITY_DN1829_c2_g1_i8
1589581	M:5	F:2	p:0.0439132	pcorr:0.0439132	-	#N/A	TRINITY_DN37990_c0_g1_i4
1589581	M:5	F:2	p:0.0439132	pcorr:0.0439132	-	#N/A	TRINITY_DN78040_c1_g4_i2
1589581	M:5	F:2	p:0.0439132	pcorr:0.0439132	-	#N/A	TRINITY_DN78040_c1_g4_i1
1589785	M:5	F:0	p:0.00290775	pcorr:0.00290775	-	Choren_v00_mik.OX359192.1G235.1	TRINITY_DN2928_c2_g1_i1
1589785	M:5	F:0	p:0.00290775	pcorr:0.00290775	-	Choren_v00_mik.OX359192.1G235.1	TRINITY_DN2928_c2_g1_i3
1589785	M:5	F:0	p:0.00290775	pcorr:0.00290775	-	Choren_v00_mik.OX359192.1G235.1	TRINITY_DN2928_c2_g1_i2
1589785	M:5	F:0	p:0.00290775	pcorr:0.00290775	-	Choren_v00_mik.OX359192.1G235.1	TRINITY_DN65_c0_g1_i2
1589785	M:5	F:0	p:0.00290775	pcorr:0.00290775	-	Choren_v00_mik.OX359192.1G235.1	TRINITY_DN15232_c0_g1_i2
1591449	M:1	F:11	p:0.00977293	pcorr:0.00977293	PO21_NASVIRetrovirus-related Pol polyprotein from type-1 retrotransposable element R2 (Fragment) OS=Nasonia vitripennis OX=7425 PE=4 SV=2	Choren_v00_mik.OX359198.1G921.1	TRINITY_DN1825_c1_g1_i12
1591449	M:1	F:11	p:0.00977293	pcorr:0.00977293	PO21_NASVIRetrovirus-related Pol polyprotein from type-1 retrotransposable element R2 (Fragment) OS=Nasonia vitripennis OX=7425 PE=4 SV=2	Choren_v00_mik.OX359198.1G921.1	TRINITY_DN1825_c1_g1_i4
1591449	M:1	F:11	p:0.00977293	pcorr:0.00977293	PO21_NASVIRetrovirus-related Pol polyprotein from type-1 retrotransposable element R2 (Fragment) OS=Nasonia vitripennis OX=7425 PE=4 SV=2	Choren_v00_mik.OX359198.1G921.1	TRINITY_DN1825_c1_g1_i15
1591449	M:1	F:11	p:0.00977293	pcorr:0.00977293	PO21_NASVIRetrovirus-related Pol polyprotein from type-1 retrotransposable element R2 (Fragment) OS=Nasonia vitripennis OX=7425 PE=4 SV=2	Choren_v00_mik.OX359198.1G921.1	TRINITY_DN1825_c1_g1_i6
1591449	M:1	F:11	p:0.00977293	pcorr:0.00977293	-	Choren_v00_mik.OX359198.1G921.1	TRINITY_DN98110_c0_g3_i1
1595353	M:5	F:2	p:0.0439132	pcorr:0.0439132	-	#N/A	TRINITY_DN73674_c0_g1_i2
1595353	M:5	F:2	p:0.0439132	pcorr:0.0439132	-	#N/A	TRINITY_DN73674_c0_g1_i3
1595353	M:5	F:2	p:0.0439132	pcorr:0.0439132	-	#N/A	TRINITY_DN63130_c0_g2_i1
1595353	M:5	F:2	p:0.0439132	pcorr:0.0439132	PLAP_HUMANPhospholipase A-2-activating protein OS=Homo sapiens OX=9606 GN=PLAA PE=1 SV=2	#N/A	TRINITY_DN1647_c0_g1_i3
1595353	M:5	F:2	p:0.0439132	pcorr:0.0439132	PLAP_HUMANPhospholipase A-2-activating protein OS=Homo sapiens OX=9606 GN=PLAA PE=1 SV=2	#N/A	TRINITY_DN1647_c0_g1_i1
1595526	M:5	F:2	p:0.0439132	pcorr:0.0439132	PO21_NASVIRetrovirus-related Pol polyprotein from type-1 retrotransposable element R2 (Fragment) OS=Nasonia vitripennis OX=7425 PE=4 SV=2	Choren_v00_mik.OX359201.1G463.1	TRINITY_DN1825_c1_g1_i12
1595526	M:5	F:2	p:0.0439132	pcorr:0.0439132	PO21_NASVIRetrovirus-related Pol polyprotein from type-1 retrotransposable element R2 (Fragment) OS=Nasonia vitripennis OX=7425 PE=4 SV=2	Choren_v00_mik.OX359201.1G463.1	TRINITY_DN1825_c1_g1_i4
1595526	M:5	F:2	p:0.0439132	pcorr:0.0439132	PO21_NASVIRetrovirus-related Pol polyprotein from type-1 retrotransposable element R2 (Fragment) OS=Nasonia vitripennis OX=7425 PE=4 SV=2	Choren_v00_mik.OX359201.1G463.1	TRINITY_DN1825_c1_g1_i15
1595526	M:5	F:2	p:0.0439132	pcorr:0.0439132	PO21_NASVIRetrovirus-related Pol polyprotein from type-1 retrotransposable element R2 (Fragment) OS=Nasonia vitripennis OX=7425 PE=4 SV=2	Choren_v00_mik.OX359201.1G463.1	TRINITY_DN1825_c1_g1_i6
1595526	M:5	F:2	p:0.0439132	pcorr:0.0439132	-	Choren_v00_mik.OX359201.1G463.1	TRINITY_DN555_c1_g1_i6
1596097	M:4	F:0	p:0.0138458	pcorr:0.0138458	-	Choren_v00_mik.OX359192.1G235.1	TRINITY_DN1874_c9_g1_i1
1596097	M:4	F:0	p:0.0138458	pcorr:0.0138458	DDX42_XENLAATP-dependent RNA helicase DDX42 OS=Xenopus laevis OX=8355 GN=ddx42 PE=2 SV=1	Choren_v00_mik.OX359192.1G235.1	TRINITY_DN2638_c0_g2_i6
1596097	M:4	F:0	p:0.0138458	pcorr:0.0138458	DDX42_XENLAATP-dependent RNA helicase DDX42 OS=Xenopus laevis OX=8355 GN=ddx42 PE=2 SV=1	Choren_v00_mik.OX359192.1G235.1	TRINITY_DN2638_c0_g2_i9
1596097	M:4	F:0	p:0.0138458	pcorr:0.0138458	DDX42_XENLAATP-dependent RNA helicase DDX42 OS=Xenopus laevis OX=8355 GN=ddx42 PE=2 SV=1	Choren_v00_mik.OX359192.1G235.1	TRINITY_DN2638_c0_g2_i7
1596097	M:4	F:0	p:0.0138458	pcorr:0.0138458	DDX42_CHICKATP-dependent RNA helicase DDX42 OS=Gallus gallus OX=9031 GN=DDX42 PE=2 SV=1	Choren_v00_mik.OX359192.1G235.1	TRINITY_DN2638_c0_g2_i8
1596829	M:2	F:12	p:0.0140786	pcorr:0.0140786	-	#N/A	TRINITY_DN81791_c0_g1_i5
1596829	M:2	F:12	p:0.0140786	pcorr:0.0140786	-	#N/A	TRINITY_DN97669_c0_g3_i1
1596829	M:2	F:12	p:0.0140786	pcorr:0.0140786	-	#N/A	TRINITY_DN56487_c0_g1_i3
1596829	M:2	F:12	p:0.0140786	pcorr:0.0140786	-	#N/A	TRINITY_DN56487_c0_g1_i1
1596829	M:2	F:12	p:0.0140786	pcorr:0.0140786	-	#N/A	TRINITY_DN56487_c0_g1_i2
1600303	M:4	F:0	p:0.0138458	pcorr:0.0138458	-	Choren_v00_mik.OX359190.1G1362.1	TRINITY_DN180555_c0_g1_i1
1600303	M:4	F:0	p:0.0138458	pcorr:0.0138458	LPLT2_CAEELLatrophilin-like protein LAT-2 OS=Caenorhabditis elegans OX=6239 GN=lat-2 PE=2 SV=1	Choren_v00_mik.OX359190.1G1362.1	TRINITY_DN2195_c0_g1_i3
1600303	M:4	F:0	p:0.0138458	pcorr:0.0138458	LPLT2_CAEELLatrophilin-like protein LAT-2 OS=Caenorhabditis elegans OX=6239 GN=lat-2 PE=2 SV=1	Choren_v00_mik.OX359190.1G1362.1	TRINITY_DN2195_c0_g1_i1
1600303	M:4	F:0	p:0.0138458	pcorr:0.0138458	LPLT2_CAEELLatrophilin-like protein LAT-2 OS=Caenorhabditis elegans OX=6239 GN=lat-2 PE=2 SV=1	Choren_v00_mik.OX359190.1G1362.1	TRINITY_DN2195_c0_g1_i11
1600303	M:4	F:0	p:0.0138458	pcorr:0.0138458	LPLT2_CAEELLatrophilin-like protein LAT-2 OS=Caenorhabditis elegans OX=6239 GN=lat-2 PE=2 SV=1	Choren_v00_mik.OX359190.1G1362.1	TRINITY_DN2195_c0_g1_i2
1600837	M:2	F:12	p:0.0140786	pcorr:0.0140786	-	#N/A	TRINITY_DN5246_c0_g1_i6
1600837	M:2	F:12	p:0.0140786	pcorr:0.0140786	-	#N/A	TRINITY_DN5246_c0_g1_i13
1600837	M:2	F:12	p:0.0140786	pcorr:0.0140786	-	#N/A	TRINITY_DN5246_c0_g1_i8
1600837	M:2	F:12	p:0.0140786	pcorr:0.0140786	-	#N/A	TRINITY_DN126722_c0_g1_i1
1600837	M:2	F:12	p:0.0140786	pcorr:0.0140786	-	#N/A	TRINITY_DN5246_c0_g1_i5
1601657	M:5	F:2	p:0.0439132	pcorr:0.0439132	-	Choren_v00_mik.OX359198.1G817.1	TRINITY_DN111901_c0_g1_i2
1604679	M:5	F:2	p:0.0439132	pcorr:0.0439132	-	#N/A	TRINITY_DN16718_c0_g1_i2
1604679	M:5	F:2	p:0.0439132	pcorr:0.0439132	-	#N/A	TRINITY_DN16718_c0_g1_i8
1604679	M:5	F:2	p:0.0439132	pcorr:0.0439132	-	#N/A	TRINITY_DN16718_c0_g1_i1
1604679	M:5	F:2	p:0.0439132	pcorr:0.0439132	-	#N/A	TRINITY_DN16718_c0_g1_i6
1604679	M:5	F:2	p:0.0439132	pcorr:0.0439132	-	#N/A	TRINITY_DN16718_c0_g1_i7
1605132	M:0	F:8	p:0.0277373	pcorr:0.0277373	-	#N/A	TRINITY_DN54864_c0_g1_i1
1605366	M:5	F:2	p:0.0439132	pcorr:0.0439132	-	Choren_v00_mik.OX359200.1G527.1	TRINITY_DN74952_c0_g1_i3
1605366	M:5	F:2	p:0.0439132	pcorr:0.0439132	-	Choren_v00_mik.OX359200.1G527.1	TRINITY_DN74952_c0_g1_i1
1605366	M:5	F:2	p:0.0439132	pcorr:0.0439132	-	Choren_v00_mik.OX359200.1G527.1	TRINITY_DN8336_c0_g1_i4
1605366	M:5	F:2	p:0.0439132	pcorr:0.0439132	-	Choren_v00_mik.OX359200.1G527.1	TRINITY_DN8336_c0_g1_i11
1605366	M:5	F:2	p:0.0439132	pcorr:0.0439132	-	Choren_v00_mik.OX359200.1G527.1	TRINITY_DN8336_c0_g1_i2
1606354	M:7	F:5	p:0.0277373	pcorr:0.0277373	-	Choren_v00_mik.OX359192.1G620.1	TRINITY_DN14871_c0_g1_i8
1606354	M:7	F:5	p:0.0277373	pcorr:0.0277373	-	Choren_v00_mik.OX359192.1G620.1	TRINITY_DN14871_c0_g1_i13
1606354	M:7	F:5	p:0.0277373	pcorr:0.0277373	-	Choren_v00_mik.OX359192.1G620.1	TRINITY_DN14871_c0_g1_i9
1606354	M:7	F:5	p:0.0277373	pcorr:0.0277373	-	Choren_v00_mik.OX359192.1G620.1	TRINITY_DN14871_c0_g1_i10
1606354	M:7	F:5	p:0.0277373	pcorr:0.0277373	-	Choren_v00_mik.OX359192.1G620.1	TRINITY_DN14871_c0_g1_i11
1610823	M:5	F:0	p:0.00290775	pcorr:0.00290775	-	#N/A	TRINITY_DN37913_c0_g1_i2
1610823	M:5	F:0	p:0.00290775	pcorr:0.00290775	-	#N/A	TRINITY_DN181417_c1_g1_i1
1610823	M:5	F:0	p:0.00290775	pcorr:0.00290775	-	#N/A	TRINITY_DN69086_c0_g1_i12
1610823	M:5	F:0	p:0.00290775	pcorr:0.00290775	-	#N/A	TRINITY_DN69086_c0_g1_i3
1610823	M:5	F:0	p:0.00290775	pcorr:0.00290775	-	#N/A	TRINITY_DN69086_c0_g1_i2
1612331	M:5	F:1	p:0.0140786	pcorr:0.0140786	-	#N/A	TRINITY_DN22910_c1_g1_i2
1612331	M:5	F:1	p:0.0140786	pcorr:0.0140786	-	#N/A	TRINITY_DN22910_c1_g1_i8
1612331	M:5	F:1	p:0.0140786	pcorr:0.0140786	-	#N/A	TRINITY_DN22910_c1_g1_i6
1620742	M:5	F:0	p:0.00290775	pcorr:0.00290775	-	#N/A	TRINITY_DN255046_c0_g1_i1
1622689	M:4	F:0	p:0.0138458	pcorr:0.0138458	-	#N/A	TRINITY_DN1829_c2_g1_i8
1622689	M:4	F:0	p:0.0138458	pcorr:0.0138458	-	#N/A	TRINITY_DN1829_c2_g1_i14
1622689	M:4	F:0	p:0.0138458	pcorr:0.0138458	-	#N/A	TRINITY_DN1829_c2_g1_i19
1622689	M:4	F:0	p:0.0138458	pcorr:0.0138458	-	#N/A	TRINITY_DN1829_c2_g1_i4
1622689	M:4	F:0	p:0.0138458	pcorr:0.0138458	-	#N/A	TRINITY_DN1829_c2_g1_i20
1626218	M:2	F:11	p:0.0439132	pcorr:0.0439132	-	#N/A	TRINITY_DN16525_c0_g1_i5
1626218	M:2	F:11	p:0.0439132	pcorr:0.0439132	TPRKB_DANREEKC/KEOPS complex subunit TPRKB OS=Danio rerio OX=7955 GN=tprkb PE=2 SV=1	#N/A	TRINITY_DN826_c0_g1_i5
1626218	M:2	F:11	p:0.0439132	pcorr:0.0439132	TPRKB_DANREEKC/KEOPS complex subunit TPRKB OS=Danio rerio OX=7955 GN=tprkb PE=2 SV=1	#N/A	TRINITY_DN826_c0_g1_i6
1626218	M:2	F:11	p:0.0439132	pcorr:0.0439132	TPRKB_DANREEKC/KEOPS complex subunit TPRKB OS=Danio rerio OX=7955 GN=tprkb PE=2 SV=1	#N/A	TRINITY_DN826_c0_g1_i4
1626218	M:2	F:11	p:0.0439132	pcorr:0.0439132	-	#N/A	TRINITY_DN16525_c0_g1_i2
1631810	M:5	F:1	p:0.0140786	pcorr:0.0140786	-	Choren_v00_mik.OX359197.1G645.1	TRINITY_DN32276_c0_g1_i5
1631810	M:5	F:1	p:0.0140786	pcorr:0.0140786	YR826_MIMIVPutative serine/threonine-protein kinase/receptor R826 OS=Acanthamoeba polyphaga mimivirus OX=212035 GN=MIMI_R826 PE=3 SV=2	Choren_v00_mik.OX359197.1G645.1	TRINITY_DN4249_c1_g1_i4
1631810	M:5	F:1	p:0.0140786	pcorr:0.0140786	RRP15_HUMANRRP15-like protein OS=Homo sapiens OX=9606 GN=RRP15 PE=1 SV=2	Choren_v00_mik.OX359197.1G645.1	TRINITY_DN4249_c1_g1_i10
1631810	M:5	F:1	p:0.0140786	pcorr:0.0140786	YR826_MIMIVPutative serine/threonine-protein kinase/receptor R826 OS=Acanthamoeba polyphaga mimivirus OX=212035 GN=MIMI_R826 PE=3 SV=2	Choren_v00_mik.OX359197.1G645.1	TRINITY_DN4249_c1_g1_i2
1631810	M:5	F:1	p:0.0140786	pcorr:0.0140786	YR826_MIMIVPutative serine/threonine-protein kinase/receptor R826 OS=Acanthamoeba polyphaga mimivirus OX=212035 GN=MIMI_R826 PE=3 SV=2	Choren_v00_mik.OX359197.1G645.1	TRINITY_DN4249_c1_g1_i8
1633041	M:5	F:1	p:0.0140786	pcorr:0.0140786	-	#N/A	TRINITY_DN1313_c1_g1_i1
1633041	M:5	F:1	p:0.0140786	pcorr:0.0140786	-	#N/A	TRINITY_DN1313_c1_g1_i6
1633041	M:5	F:1	p:0.0140786	pcorr:0.0140786	-	#N/A	TRINITY_DN25589_c0_g1_i3
1633041	M:5	F:1	p:0.0140786	pcorr:0.0140786	-	#N/A	TRINITY_DN25589_c0_g1_i1
1633041	M:5	F:1	p:0.0140786	pcorr:0.0140786	-	#N/A	TRINITY_DN36833_c0_g1_i3
1634401	M:4	F:0	p:0.0138458	pcorr:0.0138458	RH39_ORYSJDEAD-box ATP-dependent RNA helicase 39 OS=Oryza sativa subsp. japonica OX=39947 GN=Os01g0184500 PE=2 SV=1	Choren_v00_mik.OX359202.1G1010.1	TRINITY_DN386_c0_g1_i20
1634401	M:4	F:0	p:0.0138458	pcorr:0.0138458	RH39_ORYSJDEAD-box ATP-dependent RNA helicase 39 OS=Oryza sativa subsp. japonica OX=39947 GN=Os01g0184500 PE=2 SV=1	Choren_v00_mik.OX359202.1G1010.1	TRINITY_DN386_c0_g1_i1
1634401	M:4	F:0	p:0.0138458	pcorr:0.0138458	PSN2_DANREPresenilin-2 OS=Danio rerio OX=7955 GN=psen2 PE=2 SV=2	Choren_v00_mik.OX359202.1G1010.1	TRINITY_DN386_c0_g1_i18
1634401	M:4	F:0	p:0.0138458	pcorr:0.0138458	PSN2_DANREPresenilin-2 OS=Danio rerio OX=7955 GN=psen2 PE=2 SV=2	Choren_v00_mik.OX359202.1G1010.1	TRINITY_DN386_c0_g1_i10
1634401	M:4	F:0	p:0.0138458	pcorr:0.0138458	RH39_ORYSJDEAD-box ATP-dependent RNA helicase 39 OS=Oryza sativa subsp. japonica OX=39947 GN=Os01g0184500 PE=2 SV=1	Choren_v00_mik.OX359202.1G1010.1	TRINITY_DN386_c0_g1_i9
1635797	M:4	F:0	p:0.0138458	pcorr:0.0138458	-	#N/A	TRINITY_DN71170_c0_g1_i1
1649439	M:6	F:1	p:0.00271931	pcorr:0.00271931	YDCC_ECOLIH repeat-associated putative transposase YdcC OS=Escherichia coli (strain K12) OX=83333 GN=ydcC PE=3 SV=1	#N/A	TRINITY_DN49547_c0_g1_i1
1649439	M:6	F:1	p:0.00271931	pcorr:0.00271931	YDCC_ECOLIH repeat-associated putative transposase YdcC OS=Escherichia coli (strain K12) OX=83333 GN=ydcC PE=3 SV=1	#N/A	TRINITY_DN49547_c0_g1_i3
1649439	M:6	F:1	p:0.00271931	pcorr:0.00271931	YDCC_ECOLIH repeat-associated putative transposase YdcC OS=Escherichia coli (strain K12) OX=83333 GN=ydcC PE=3 SV=1	#N/A	TRINITY_DN49547_c0_g1_i5
1649439	M:6	F:1	p:0.00271931	pcorr:0.00271931	YDCC_ECOLIH repeat-associated putative transposase YdcC OS=Escherichia coli (strain K12) OX=83333 GN=ydcC PE=3 SV=1	#N/A	TRINITY_DN49547_c0_g1_i6
1649439	M:6	F:1	p:0.00271931	pcorr:0.00271931	YDCC_ECOLIH repeat-associated putative transposase YdcC OS=Escherichia coli (strain K12) OX=83333 GN=ydcC PE=3 SV=1	#N/A	TRINITY_DN49547_c0_g1_i7
1650074	M:0	F:9	p:0.012518	pcorr:0.012518	-	#N/A	TRINITY_DN5767_c0_g1_i3
1650074	M:0	F:9	p:0.012518	pcorr:0.012518	-	#N/A	TRINITY_DN5767_c0_g1_i5
1650074	M:0	F:9	p:0.012518	pcorr:0.012518	-	#N/A	TRINITY_DN5767_c0_g1_i12
1650074	M:0	F:9	p:0.012518	pcorr:0.012518	-	#N/A	TRINITY_DN5767_c0_g1_i7
1650074	M:0	F:9	p:0.012518	pcorr:0.012518	-	#N/A	TRINITY_DN173715_c0_g4_i2
1650828	M:6	F:3	p:0.0267948	pcorr:0.0267948	-	Choren_v00_mik.OX359199.1G375.1	TRINITY_DN224852_c0_g1_i1
1650828	M:6	F:3	p:0.0267948	pcorr:0.0267948	NU205_HUMANNuclear pore complex protein Nup205 OS=Homo sapiens OX=9606 GN=NUP205 PE=1 SV=3	Choren_v00_mik.OX359199.1G375.1	TRINITY_DN3140_c1_g2_i4
1650828	M:6	F:3	p:0.0267948	pcorr:0.0267948	NU205_HUMANNuclear pore complex protein Nup205 OS=Homo sapiens OX=9606 GN=NUP205 PE=1 SV=3	Choren_v00_mik.OX359199.1G375.1	TRINITY_DN3140_c1_g2_i6
1650828	M:6	F:3	p:0.0267948	pcorr:0.0267948	NU205_HUMANNuclear pore complex protein Nup205 OS=Homo sapiens OX=9606 GN=NUP205 PE=1 SV=3	Choren_v00_mik.OX359199.1G375.1	TRINITY_DN3140_c1_g2_i5
1653719	M:5	F:2	p:0.0439132	pcorr:0.0439132	-	#N/A	TRINITY_DN1829_c2_g1_i14
1653719	M:5	F:2	p:0.0439132	pcorr:0.0439132	-	#N/A	TRINITY_DN1829_c2_g1_i19
1653719	M:5	F:2	p:0.0439132	pcorr:0.0439132	-	#N/A	TRINITY_DN1829_c2_g1_i4
1653719	M:5	F:2	p:0.0439132	pcorr:0.0439132	-	#N/A	TRINITY_DN1829_c2_g1_i20
1653719	M:5	F:2	p:0.0439132	pcorr:0.0439132	-	#N/A	TRINITY_DN1829_c2_g1_i18
1660672	M:5	F:1	p:0.0140786	pcorr:0.0140786	-	#N/A	TRINITY_DN43756_c0_g1_i1
1663116	M:1	F:10	p:0.0267948	pcorr:0.0267948	-	#N/A	TRINITY_DN14791_c1_g2_i2
1663116	M:1	F:10	p:0.0267948	pcorr:0.0267948	-	#N/A	TRINITY_DN102911_c0_g2_i2
1663116	M:1	F:10	p:0.0267948	pcorr:0.0267948	-	#N/A	TRINITY_DN102911_c0_g2_i1
1663877	M:0	F:13	p:6.87148e-05	pcorr:6.87148e-05	AP1B1_MOUSEAP-1 complex subunit beta-1 OS=Mus musculus OX=10090 GN=Ap1b1 PE=1 SV=2	Choren_v00_mik.OX359191.1G457.1	TRINITY_DN345_c0_g2_i4
1663877	M:0	F:13	p:6.87148e-05	pcorr:6.87148e-05	AP1B1_MOUSEAP-1 complex subunit beta-1 OS=Mus musculus OX=10090 GN=Ap1b1 PE=1 SV=2	Choren_v00_mik.OX359191.1G457.1	TRINITY_DN345_c0_g2_i2
1663877	M:0	F:13	p:6.87148e-05	pcorr:6.87148e-05	AP1B1_MOUSEAP-1 complex subunit beta-1 OS=Mus musculus OX=10090 GN=Ap1b1 PE=1 SV=2	Choren_v00_mik.OX359191.1G457.1	TRINITY_DN345_c0_g2_i5
1663877	M:0	F:13	p:6.87148e-05	pcorr:6.87148e-05	AP1B1_MOUSEAP-1 complex subunit beta-1 OS=Mus musculus OX=10090 GN=Ap1b1 PE=1 SV=2	Choren_v00_mik.OX359191.1G457.1	TRINITY_DN345_c0_g2_i3
1663877	M:0	F:13	p:6.87148e-05	pcorr:6.87148e-05	PAR15_HUMANProtein mono-ADP-ribosyltransferase PARP15 OS=Homo sapiens OX=9606 GN=PARP15 PE=1 SV=2	Choren_v00_mik.OX359191.1G457.1	TRINITY_DN14304_c0_g1_i2
1669743	M:5	F:2	p:0.0439132	pcorr:0.0439132	-	#N/A	TRINITY_DN52120_c0_g1_i3
1669743	M:5	F:2	p:0.0439132	pcorr:0.0439132	GARS_HUMANGlycine--tRNA ligase OS=Homo sapiens OX=9606 GN=GARS1 PE=1 SV=3	#N/A	TRINITY_DN2389_c1_g1_i7
1669743	M:5	F:2	p:0.0439132	pcorr:0.0439132	GARS_HUMANGlycine--tRNA ligase OS=Homo sapiens OX=9606 GN=GARS1 PE=1 SV=3	#N/A	TRINITY_DN2389_c1_g1_i2
1669743	M:5	F:2	p:0.0439132	pcorr:0.0439132	GARS_HUMANGlycine--tRNA ligase OS=Homo sapiens OX=9606 GN=GARS1 PE=1 SV=3	#N/A	TRINITY_DN2389_c1_g1_i14
1669743	M:5	F:2	p:0.0439132	pcorr:0.0439132	GARS_HUMANGlycine--tRNA ligase OS=Homo sapiens OX=9606 GN=GARS1 PE=1 SV=3	#N/A	TRINITY_DN2389_c1_g1_i12
1673961	M:0	F:13	p:6.87148e-05	pcorr:6.87148e-05	-	Choren_v00_mik.OX359201.1G531.1	TRINITY_DN1126_c0_g1_i7
1673961	M:0	F:13	p:6.87148e-05	pcorr:6.87148e-05	-	Choren_v00_mik.OX359201.1G531.1	TRINITY_DN26024_c0_g1_i2
1673961	M:0	F:13	p:6.87148e-05	pcorr:6.87148e-05	-	Choren_v00_mik.OX359201.1G531.1	TRINITY_DN26024_c0_g1_i3
1673961	M:0	F:13	p:6.87148e-05	pcorr:6.87148e-05	-	Choren_v00_mik.OX359201.1G531.1	TRINITY_DN26024_c0_g1_i1
1681481	M:6	F:3	p:0.0267948	pcorr:0.0267948	PLXA3_HUMANPlexin-A3 OS=Homo sapiens OX=9606 GN=PLXNA3 PE=1 SV=3	Choren_v00_mik.OX359192.1G181.1	TRINITY_DN3711_c0_g2_i20
1681481	M:6	F:3	p:0.0267948	pcorr:0.0267948	PLXA4_MOUSEPlexin-A4 OS=Mus musculus OX=10090 GN=Plxna4 PE=1 SV=3	Choren_v00_mik.OX359192.1G181.1	TRINITY_DN3711_c0_g2_i7
1681481	M:6	F:3	p:0.0267948	pcorr:0.0267948	PLXA3_HUMANPlexin-A3 OS=Homo sapiens OX=9606 GN=PLXNA3 PE=1 SV=3	Choren_v00_mik.OX359192.1G181.1	TRINITY_DN3711_c0_g2_i21
1681481	M:6	F:3	p:0.0267948	pcorr:0.0267948	PLXB1_MOUSEPlexin-B1 OS=Mus musculus OX=10090 GN=Plxnb1 PE=1 SV=2	Choren_v00_mik.OX359192.1G181.1	TRINITY_DN3711_c0_g2_i19
1681481	M:6	F:3	p:0.0267948	pcorr:0.0267948	PLXA3_HUMANPlexin-A3 OS=Homo sapiens OX=9606 GN=PLXNA3 PE=1 SV=3	Choren_v00_mik.OX359192.1G181.1	TRINITY_DN3711_c0_g2_i6
1683566	M:6	F:3	p:0.0267948	pcorr:0.0267948	-	#N/A	TRINITY_DN24273_c0_g1_i4
1683566	M:6	F:3	p:0.0267948	pcorr:0.0267948	-	#N/A	TRINITY_DN24273_c0_g1_i2
1683566	M:6	F:3	p:0.0267948	pcorr:0.0267948	-	#N/A	TRINITY_DN24273_c0_g1_i1
1683566	M:6	F:3	p:0.0267948	pcorr:0.0267948	-	#N/A	TRINITY_DN24273_c0_g1_i1
1683566	M:6	F:3	p:0.0267948	pcorr:0.0267948	-	#N/A	TRINITY_DN3229_c24_g1_i1
1683566	M:6	F:3	p:0.0267948	pcorr:0.0267948	-	#N/A	TRINITY_DN3229_c24_g1_i2
1688681	M:5	F:0	p:0.00290775	pcorr:0.00290775	-	#N/A	TRINITY_DN3140_c1_g2_i1
1688681	M:5	F:0	p:0.00290775	pcorr:0.00290775	NU205_HUMANNuclear pore complex protein Nup205 OS=Homo sapiens OX=9606 GN=NUP205 PE=1 SV=3	#N/A	TRINITY_DN3140_c1_g2_i4
1688681	M:5	F:0	p:0.00290775	pcorr:0.00290775	-	#N/A	TRINITY_DN3140_c1_g2_i2
1688681	M:5	F:0	p:0.00290775	pcorr:0.00290775	NU205_HUMANNuclear pore complex protein Nup205 OS=Homo sapiens OX=9606 GN=NUP205 PE=1 SV=3	#N/A	TRINITY_DN3140_c1_g2_i5
1689415	M:5	F:1	p:0.0140786	pcorr:0.0140786	-	#N/A	TRINITY_DN285363_c0_g1_i1
1693200	M:5	F:2	p:0.0439132	pcorr:0.0439132	-	#N/A	TRINITY_DN1304_c2_g1_i9
1693200	M:5	F:2	p:0.0439132	pcorr:0.0439132	-	#N/A	TRINITY_DN4264_c4_g1_i1
1693200	M:5	F:2	p:0.0439132	pcorr:0.0439132	-	#N/A	TRINITY_DN1304_c2_g1_i10
1693200	M:5	F:2	p:0.0439132	pcorr:0.0439132	-	#N/A	TRINITY_DN67664_c1_g4_i1
1693200	M:5	F:2	p:0.0439132	pcorr:0.0439132	-	#N/A	TRINITY_DN1304_c2_g1_i2
1694253	M:6	F:2	p:0.00977293	pcorr:0.00977293	-	#N/A	TRINITY_DN1044_c0_g1_i8
1694253	M:6	F:2	p:0.00977293	pcorr:0.00977293	FAT4_MOUSEProtocadherin Fat 4 OS=Mus musculus OX=10090 GN=Fat4 PE=1 SV=2	#N/A	TRINITY_DN1044_c0_g1_i1
1694253	M:6	F:2	p:0.00977293	pcorr:0.00977293	FAT4_MOUSEProtocadherin Fat 4 OS=Mus musculus OX=10090 GN=Fat4 PE=1 SV=2	#N/A	TRINITY_DN1044_c0_g1_i6
1697734	M:5	F:2	p:0.0439132	pcorr:0.0439132	DALD3_DANREDALR anticodon-binding domain-containing protein 3 OS=Danio rerio OX=7955 GN=dalrd3 PE=2 SV=1	#N/A	TRINITY_DN1055_c0_g1_i4
1697734	M:5	F:2	p:0.0439132	pcorr:0.0439132	GPKOW_DANREG-patch domain and KOW motifs-containing protein OS=Danio rerio OX=7955 GN=gpkow PE=2 SV=2	#N/A	TRINITY_DN1055_c0_g1_i16
1698440	M:5	F:1	p:0.0140786	pcorr:0.0140786	-	Choren_v00_mik.OX359196.1G145.1	TRINITY_DN45235_c0_g1_i1
1698440	M:5	F:1	p:0.0140786	pcorr:0.0140786	-	Choren_v00_mik.OX359196.1G145.1	TRINITY_DN45235_c0_g1_i2
1698781	M:2	F:13	p:0.00290775	pcorr:0.00290775	-	#N/A	TRINITY_DN258743_c0_g1_i1
1711027	M:0	F:8	p:0.0277373	pcorr:0.0277373	-	#N/A	TRINITY_DN38649_c0_g1_i3
1711027	M:0	F:8	p:0.0277373	pcorr:0.0277373	-	#N/A	TRINITY_DN38649_c0_g1_i5
1711027	M:0	F:8	p:0.0277373	pcorr:0.0277373	-	#N/A	TRINITY_DN8862_c0_g1_i8
1711027	M:0	F:8	p:0.0277373	pcorr:0.0277373	DGAT1_MOUSEDiacylglycerol O-acyltransferase 1 OS=Mus musculus OX=10090 GN=Dgat1 PE=1 SV=1	#N/A	TRINITY_DN6318_c0_g1_i9
1711027	M:0	F:8	p:0.0277373	pcorr:0.0277373	DGAT1_MOUSEDiacylglycerol O-acyltransferase 1 OS=Mus musculus OX=10090 GN=Dgat1 PE=1 SV=1	#N/A	TRINITY_DN6318_c0_g1_i16
1713024	M:4	F:0	p:0.0138458	pcorr:0.0138458	MED23_XENLAMediator of RNA polymerase II transcription subunit 23 OS=Xenopus laevis OX=8355 GN=med23 PE=2 SV=1	#N/A	TRINITY_DN7469_c0_g1_i18
1713024	M:4	F:0	p:0.0138458	pcorr:0.0138458	MED23_XENLAMediator of RNA polymerase II transcription subunit 23 OS=Xenopus laevis OX=8355 GN=med23 PE=2 SV=1	#N/A	TRINITY_DN7469_c0_g1_i10
1713024	M:4	F:0	p:0.0138458	pcorr:0.0138458	MED23_XENLAMediator of RNA polymerase II transcription subunit 23 OS=Xenopus laevis OX=8355 GN=med23 PE=2 SV=1	#N/A	TRINITY_DN7469_c0_g1_i2
1713024	M:4	F:0	p:0.0138458	pcorr:0.0138458	MED23_XENLAMediator of RNA polymerase II transcription subunit 23 OS=Xenopus laevis OX=8355 GN=med23 PE=2 SV=1	#N/A	TRINITY_DN7469_c0_g1_i19
1713024	M:4	F:0	p:0.0138458	pcorr:0.0138458	MED23_XENLAMediator of RNA polymerase II transcription subunit 23 OS=Xenopus laevis OX=8355 GN=med23 PE=2 SV=1	#N/A	TRINITY_DN7469_c0_g1_i26
1716143	M:6	F:2	p:0.00977293	pcorr:0.00977293	-	Choren_v00_mik.OX359197.1G645.1	TRINITY_DN32276_c0_g1_i5
1716143	M:6	F:2	p:0.00977293	pcorr:0.00977293	YR826_MIMIVPutative serine/threonine-protein kinase/receptor R826 OS=Acanthamoeba polyphaga mimivirus OX=212035 GN=MIMI_R826 PE=3 SV=2	Choren_v00_mik.OX359197.1G645.1	TRINITY_DN4249_c1_g1_i4
1716143	M:6	F:2	p:0.00977293	pcorr:0.00977293	RRP15_HUMANRRP15-like protein OS=Homo sapiens OX=9606 GN=RRP15 PE=1 SV=2	Choren_v00_mik.OX359197.1G645.1	TRINITY_DN4249_c1_g1_i10
1716143	M:6	F:2	p:0.00977293	pcorr:0.00977293	YR826_MIMIVPutative serine/threonine-protein kinase/receptor R826 OS=Acanthamoeba polyphaga mimivirus OX=212035 GN=MIMI_R826 PE=3 SV=2	Choren_v00_mik.OX359197.1G645.1	TRINITY_DN4249_c1_g1_i2
1716143	M:6	F:2	p:0.00977293	pcorr:0.00977293	YR826_MIMIVPutative serine/threonine-protein kinase/receptor R826 OS=Acanthamoeba polyphaga mimivirus OX=212035 GN=MIMI_R826 PE=3 SV=2	Choren_v00_mik.OX359197.1G645.1	TRINITY_DN4249_c1_g1_i8
1718148	M:5	F:2	p:0.0439132	pcorr:0.0439132	-	Choren_v00_mik.OX359193.1G311.1	TRINITY_DN4112_c0_g2_i8
1718148	M:5	F:2	p:0.0439132	pcorr:0.0439132	-	Choren_v00_mik.OX359193.1G311.1	TRINITY_DN4112_c0_g2_i9
1718148	M:5	F:2	p:0.0439132	pcorr:0.0439132	-	Choren_v00_mik.OX359193.1G311.1	TRINITY_DN4112_c0_g2_i2
1718148	M:5	F:2	p:0.0439132	pcorr:0.0439132	-	Choren_v00_mik.OX359193.1G311.1	TRINITY_DN4112_c0_g2_i3
1718148	M:5	F:2	p:0.0439132	pcorr:0.0439132	-	Choren_v00_mik.OX359193.1G311.1	TRINITY_DN4112_c0_g2_i1
1722085	M:4	F:0	p:0.0138458	pcorr:0.0138458	RSMI_SYNY3Ribosomal RNA small subunit methyltransferase I OS=Synechocystis sp. (strain PCC 6803 / Kazusa) OX=1111708 GN=rsmI PE=3 SV=1	#N/A	TRINITY_DN119549_c0_g2_i1
1723052	M:5	F:1	p:0.0140786	pcorr:0.0140786	-	#N/A	TRINITY_DN42457_c0_g1_i4
1723052	M:5	F:1	p:0.0140786	pcorr:0.0140786	-	#N/A	TRINITY_DN42457_c0_g1_i1
1723052	M:5	F:1	p:0.0140786	pcorr:0.0140786	-	#N/A	TRINITY_DN42457_c0_g1_i7
1723052	M:5	F:1	p:0.0140786	pcorr:0.0140786	-	#N/A	TRINITY_DN42457_c0_g1_i2
1723052	M:5	F:1	p:0.0140786	pcorr:0.0140786	-	#N/A	TRINITY_DN42457_c0_g1_i3
1724700	M:5	F:1	p:0.0140786	pcorr:0.0140786	-	#N/A	TRINITY_DN23829_c1_g1_i1
1724700	M:5	F:1	p:0.0140786	pcorr:0.0140786	-	#N/A	TRINITY_DN3894_c0_g1_i2
1724700	M:5	F:1	p:0.0140786	pcorr:0.0140786	-	#N/A	TRINITY_DN3894_c0_g1_i9
1724700	M:5	F:1	p:0.0140786	pcorr:0.0140786	-	#N/A	TRINITY_DN3894_c0_g1_i6
1724700	M:5	F:1	p:0.0140786	pcorr:0.0140786	-	#N/A	TRINITY_DN3894_c0_g1_i19
1730792	M:4	F:0	p:0.0138458	pcorr:0.0138458	-	Choren_v00_mik.OX359198.1G1024.1	TRINITY_DN3048_c1_g1_i2
1733044	M:5	F:2	p:0.0439132	pcorr:0.0439132	PO21_NASVIRetrovirus-related Pol polyprotein from type-1 retrotransposable element R2 (Fragment) OS=Nasonia vitripennis OX=7425 PE=4 SV=2	Choren_v00_mik.OX359192.1G520.1	TRINITY_DN1825_c1_g1_i12
1733044	M:5	F:2	p:0.0439132	pcorr:0.0439132	PO21_NASVIRetrovirus-related Pol polyprotein from type-1 retrotransposable element R2 (Fragment) OS=Nasonia vitripennis OX=7425 PE=4 SV=2	Choren_v00_mik.OX359192.1G520.1	TRINITY_DN1825_c1_g1_i4
1733044	M:5	F:2	p:0.0439132	pcorr:0.0439132	PO21_NASVIRetrovirus-related Pol polyprotein from type-1 retrotransposable element R2 (Fragment) OS=Nasonia vitripennis OX=7425 PE=4 SV=2	Choren_v00_mik.OX359192.1G520.1	TRINITY_DN1825_c1_g1_i15
1733044	M:5	F:2	p:0.0439132	pcorr:0.0439132	PO21_NASVIRetrovirus-related Pol polyprotein from type-1 retrotransposable element R2 (Fragment) OS=Nasonia vitripennis OX=7425 PE=4 SV=2	Choren_v00_mik.OX359192.1G520.1	TRINITY_DN1825_c1_g1_i6
1733044	M:5	F:2	p:0.0439132	pcorr:0.0439132	-	Choren_v00_mik.OX359192.1G520.1	TRINITY_DN555_c1_g1_i6
1740038	M:5	F:1	p:0.0140786	pcorr:0.0140786	-	#N/A	TRINITY_DN4804_c1_g1_i6
1740038	M:5	F:1	p:0.0140786	pcorr:0.0140786	-	#N/A	TRINITY_DN4804_c1_g1_i3
1740038	M:5	F:1	p:0.0140786	pcorr:0.0140786	-	#N/A	TRINITY_DN1829_c2_g1_i8
1740038	M:5	F:1	p:0.0140786	pcorr:0.0140786	-	#N/A	TRINITY_DN1829_c2_g1_i14
1740038	M:5	F:1	p:0.0140786	pcorr:0.0140786	-	#N/A	TRINITY_DN1829_c2_g1_i19
1742352	M:0	F:13	p:6.87148e-05	pcorr:6.87148e-05	-	Choren_v00_mik.OX359194.1G410.1	TRINITY_DN32231_c0_g1_i7
1742352	M:0	F:13	p:6.87148e-05	pcorr:6.87148e-05	-	Choren_v00_mik.OX359194.1G410.1	TRINITY_DN84741_c0_g1_i2
1742352	M:0	F:13	p:6.87148e-05	pcorr:6.87148e-05	-	Choren_v00_mik.OX359194.1G410.1	TRINITY_DN84741_c0_g1_i1
1742352	M:0	F:13	p:6.87148e-05	pcorr:6.87148e-05	-	Choren_v00_mik.OX359194.1G410.1	TRINITY_DN27194_c2_g1_i8
1742352	M:0	F:13	p:6.87148e-05	pcorr:6.87148e-05	-	Choren_v00_mik.OX359194.1G410.1	TRINITY_DN27194_c2_g1_i4
1744698	M:0	F:13	p:6.87148e-05	pcorr:6.87148e-05	Y8045_DICDIProbable poly	#N/A	TRINITY_DN1126_c0_g1_i12
1744698	M:0	F:13	p:6.87148e-05	pcorr:6.87148e-05	-	#N/A	TRINITY_DN235856_c0_g1_i1
1745159	M:5	F:1	p:0.0140786	pcorr:0.0140786	-	#N/A	TRINITY_DN278955_c0_g1_i1
1745305	M:6	F:3	p:0.0267948	pcorr:0.0267948	-	#N/A	TRINITY_DN71288_c0_g1_i1
1747843	M:1	F:11	p:0.00977293	pcorr:0.00977293	-	Choren_v00_mik.OX359193.1G915.1	TRINITY_DN4051_c0_g1_i5
1747843	M:1	F:11	p:0.00977293	pcorr:0.00977293	-	Choren_v00_mik.OX359193.1G915.1	TRINITY_DN4051_c0_g1_i1
1747843	M:1	F:11	p:0.00977293	pcorr:0.00977293	-	Choren_v00_mik.OX359193.1G915.1	TRINITY_DN4051_c0_g1_i11
1747843	M:1	F:11	p:0.00977293	pcorr:0.00977293	-	Choren_v00_mik.OX359193.1G915.1	TRINITY_DN4051_c0_g1_i7
1747843	M:1	F:11	p:0.00977293	pcorr:0.00977293	-	Choren_v00_mik.OX359193.1G915.1	TRINITY_DN4051_c0_g1_i10
1748519	M:6	F:3	p:0.0267948	pcorr:0.0267948	-	#N/A	TRINITY_DN31293_c0_g1_i4
1748519	M:6	F:3	p:0.0267948	pcorr:0.0267948	-	#N/A	TRINITY_DN374_c0_g1_i11
1748519	M:6	F:3	p:0.0267948	pcorr:0.0267948	-	#N/A	TRINITY_DN374_c0_g1_i3
1748519	M:6	F:3	p:0.0267948	pcorr:0.0267948	-	#N/A	TRINITY_DN29924_c0_g2_i3
1748519	M:6	F:3	p:0.0267948	pcorr:0.0267948	-	#N/A	TRINITY_DN29924_c0_g2_i2
1749399	M:6	F:3	p:0.0267948	pcorr:0.0267948	-	#N/A	TRINITY_DN20773_c0_g1_i3
1749399	M:6	F:3	p:0.0267948	pcorr:0.0267948	-	#N/A	TRINITY_DN20773_c0_g1_i7
1749399	M:6	F:3	p:0.0267948	pcorr:0.0267948	-	#N/A	TRINITY_DN20773_c0_g1_i2
1749399	M:6	F:3	p:0.0267948	pcorr:0.0267948	-	#N/A	TRINITY_DN20773_c0_g1_i1
1749399	M:6	F:3	p:0.0267948	pcorr:0.0267948	-	#N/A	TRINITY_DN20773_c0_g1_i6
1750848	M:4	F:0	p:0.0138458	pcorr:0.0138458	-	Choren_v00_mik.OX359195.1G986.1	TRINITY_DN25081_c0_g1_i3
1750848	M:4	F:0	p:0.0138458	pcorr:0.0138458	-	Choren_v00_mik.OX359195.1G986.1	TRINITY_DN25081_c0_g1_i1
1750848	M:4	F:0	p:0.0138458	pcorr:0.0138458	-	Choren_v00_mik.OX359195.1G986.1	TRINITY_DN3954_c0_g1_i17
1750848	M:4	F:0	p:0.0138458	pcorr:0.0138458	TRAF6_DANRETNF receptor-associated factor 6 OS=Danio rerio OX=7955 GN=traf6 PE=1 SV=2	Choren_v00_mik.OX359195.1G986.1	TRINITY_DN3954_c0_g1_i22
1750848	M:4	F:0	p:0.0138458	pcorr:0.0138458	TRAF6_DANRETNF receptor-associated factor 6 OS=Danio rerio OX=7955 GN=traf6 PE=1 SV=2	Choren_v00_mik.OX359195.1G986.1	TRINITY_DN3954_c0_g1_i21
1754052	M:6	F:3	p:0.0267948	pcorr:0.0267948	-	#N/A	TRINITY_DN255046_c0_g1_i1
1754553	M:6	F:3	p:0.0267948	pcorr:0.0267948	DHRS4_HUMANDehydrogenase/reductase SDR family member 4 OS=Homo sapiens OX=9606 GN=DHRS4 PE=1 SV=3	#N/A	TRINITY_DN160864_c0_g1_i1
1754553	M:6	F:3	p:0.0267948	pcorr:0.0267948	DHRS4_RABITDehydrogenase/reductase SDR family member 4 (Fragment) OS=Oryctolagus cuniculus OX=9986 GN=DHRS4 PE=1 SV=1	#N/A	TRINITY_DN160864_c0_g1_i6
1754553	M:6	F:3	p:0.0267948	pcorr:0.0267948	DHRS4_HUMANDehydrogenase/reductase SDR family member 4 OS=Homo sapiens OX=9606 GN=DHRS4 PE=1 SV=3	#N/A	TRINITY_DN160864_c0_g1_i2
1754889	M:5	F:2	p:0.0439132	pcorr:0.0439132	-	Choren_v00_mik.OX359190.1G612.1	TRINITY_DN118890_c0_g1_i2
1760041	M:5	F:1	p:0.0140786	pcorr:0.0140786	GCP5_MOUSEGamma-tubulin complex component 5 OS=Mus musculus OX=10090 GN=Tubgcp5 PE=2 SV=2	Choren_v00_mik.OX359201.1G860.1	TRINITY_DN1163_c0_g1_i7
1760041	M:5	F:1	p:0.0140786	pcorr:0.0140786	GCP5_MOUSEGamma-tubulin complex component 5 OS=Mus musculus OX=10090 GN=Tubgcp5 PE=2 SV=2	Choren_v00_mik.OX359201.1G860.1	TRINITY_DN1163_c0_g1_i7
1760041	M:5	F:1	p:0.0140786	pcorr:0.0140786	GCP5_MOUSEGamma-tubulin complex component 5 OS=Mus musculus OX=10090 GN=Tubgcp5 PE=2 SV=2	Choren_v00_mik.OX359201.1G860.1	TRINITY_DN1163_c0_g1_i2
1760041	M:5	F:1	p:0.0140786	pcorr:0.0140786	GCP5_MOUSEGamma-tubulin complex component 5 OS=Mus musculus OX=10090 GN=Tubgcp5 PE=2 SV=2	Choren_v00_mik.OX359201.1G860.1	TRINITY_DN1163_c0_g1_i2
1760041	M:5	F:1	p:0.0140786	pcorr:0.0140786	GCP5_MOUSEGamma-tubulin complex component 5 OS=Mus musculus OX=10090 GN=Tubgcp5 PE=2 SV=2	Choren_v00_mik.OX359201.1G860.1	TRINITY_DN1163_c0_g1_i10
1760041	M:5	F:1	p:0.0140786	pcorr:0.0140786	GCP5_MOUSEGamma-tubulin complex component 5 OS=Mus musculus OX=10090 GN=Tubgcp5 PE=2 SV=2	Choren_v00_mik.OX359201.1G860.1	TRINITY_DN1163_c0_g1_i10
1760041	M:5	F:1	p:0.0140786	pcorr:0.0140786	GCP5_MOUSEGamma-tubulin complex component 5 OS=Mus musculus OX=10090 GN=Tubgcp5 PE=2 SV=2	Choren_v00_mik.OX359201.1G860.1	TRINITY_DN1163_c0_g1_i8
1760041	M:5	F:1	p:0.0140786	pcorr:0.0140786	GCP5_MOUSEGamma-tubulin complex component 5 OS=Mus musculus OX=10090 GN=Tubgcp5 PE=2 SV=2	Choren_v00_mik.OX359201.1G860.1	TRINITY_DN1163_c0_g1_i8
1760041	M:5	F:1	p:0.0140786	pcorr:0.0140786	GCP5_MOUSEGamma-tubulin complex component 5 OS=Mus musculus OX=10090 GN=Tubgcp5 PE=2 SV=2	Choren_v00_mik.OX359201.1G860.1	TRINITY_DN1163_c0_g1_i4
1760041	M:5	F:1	p:0.0140786	pcorr:0.0140786	GCP5_MOUSEGamma-tubulin complex component 5 OS=Mus musculus OX=10090 GN=Tubgcp5 PE=2 SV=2	Choren_v00_mik.OX359201.1G860.1	TRINITY_DN1163_c0_g1_i4
1761555	M:4	F:0	p:0.0138458	pcorr:0.0138458	-	#N/A	TRINITY_DN63897_c0_g1_i1
1761555	M:4	F:0	p:0.0138458	pcorr:0.0138458	-	#N/A	TRINITY_DN2076_c1_g3_i1
1765786	M:5	F:1	p:0.0140786	pcorr:0.0140786	-	Choren_v00_mik.OX359200.1G113.2	TRINITY_DN2705_c0_g2_i13
1765786	M:5	F:1	p:0.0140786	pcorr:0.0140786	-	Choren_v00_mik.OX359200.1G113.2	TRINITY_DN2705_c0_g2_i10
1765786	M:5	F:1	p:0.0140786	pcorr:0.0140786	-	Choren_v00_mik.OX359200.1G113.2	TRINITY_DN2705_c0_g2_i6
1765786	M:5	F:1	p:0.0140786	pcorr:0.0140786	-	Choren_v00_mik.OX359200.1G113.2	TRINITY_DN2705_c0_g2_i14
1765786	M:5	F:1	p:0.0140786	pcorr:0.0140786	-	Choren_v00_mik.OX359200.1G113.2	TRINITY_DN2705_c0_g2_i5
1765944	M:5	F:1	p:0.0140786	pcorr:0.0140786	-	#N/A	TRINITY_DN6071_c0_g1_i7
1765944	M:5	F:1	p:0.0140786	pcorr:0.0140786	-	#N/A	TRINITY_DN6071_c0_g1_i7
1765944	M:5	F:1	p:0.0140786	pcorr:0.0140786	-	#N/A	TRINITY_DN70322_c0_g1_i1
1765944	M:5	F:1	p:0.0140786	pcorr:0.0140786	-	#N/A	TRINITY_DN39194_c0_g1_i2
1765944	M:5	F:1	p:0.0140786	pcorr:0.0140786	-	#N/A	TRINITY_DN70322_c0_g1_i7
1765944	M:5	F:1	p:0.0140786	pcorr:0.0140786	-	#N/A	TRINITY_DN34810_c0_g1_i5
1767355	M:0	F:13	p:6.87148e-05	pcorr:6.87148e-05	PO21_NASVIRetrovirus-related Pol polyprotein from type-1 retrotransposable element R2 (Fragment) OS=Nasonia vitripennis OX=7425 PE=4 SV=2	Choren_v00_mik.OX359194.1G526.1	TRINITY_DN1825_c1_g1_i12
1767355	M:0	F:13	p:6.87148e-05	pcorr:6.87148e-05	PO21_NASVIRetrovirus-related Pol polyprotein from type-1 retrotransposable element R2 (Fragment) OS=Nasonia vitripennis OX=7425 PE=4 SV=2	Choren_v00_mik.OX359194.1G526.1	TRINITY_DN1825_c1_g1_i4
1767355	M:0	F:13	p:6.87148e-05	pcorr:6.87148e-05	PO21_NASVIRetrovirus-related Pol polyprotein from type-1 retrotransposable element R2 (Fragment) OS=Nasonia vitripennis OX=7425 PE=4 SV=2	Choren_v00_mik.OX359194.1G526.1	TRINITY_DN1825_c1_g1_i15
1767355	M:0	F:13	p:6.87148e-05	pcorr:6.87148e-05	PO21_NASVIRetrovirus-related Pol polyprotein from type-1 retrotransposable element R2 (Fragment) OS=Nasonia vitripennis OX=7425 PE=4 SV=2	Choren_v00_mik.OX359194.1G526.1	TRINITY_DN1825_c1_g1_i6
1767355	M:0	F:13	p:6.87148e-05	pcorr:6.87148e-05	-	Choren_v00_mik.OX359194.1G526.1	TRINITY_DN98110_c0_g1_i1
1768234	M:0	F:8	p:0.0277373	pcorr:0.0277373	-	#N/A	TRINITY_DN97669_c0_g3_i1
1768234	M:0	F:8	p:0.0277373	pcorr:0.0277373	-	#N/A	TRINITY_DN81791_c0_g1_i5
1768234	M:0	F:8	p:0.0277373	pcorr:0.0277373	-	#N/A	TRINITY_DN56487_c0_g1_i3
1768234	M:0	F:8	p:0.0277373	pcorr:0.0277373	-	#N/A	TRINITY_DN56487_c0_g1_i1
1768234	M:0	F:8	p:0.0277373	pcorr:0.0277373	-	#N/A	TRINITY_DN56487_c0_g1_i2
1768344	M:6	F:3	p:0.0267948	pcorr:0.0267948	-	#N/A	TRINITY_DN95668_c0_g1_i1
1768344	M:6	F:3	p:0.0267948	pcorr:0.0267948	-	#N/A	TRINITY_DN20777_c1_g1_i1
1774176	M:5	F:2	p:0.0439132	pcorr:0.0439132	-	Choren_v00_mik.OX359200.1G487.1	TRINITY_DN21863_c0_g1_i3
1774176	M:5	F:2	p:0.0439132	pcorr:0.0439132	-	Choren_v00_mik.OX359200.1G487.1	TRINITY_DN21863_c0_g1_i3
1774176	M:5	F:2	p:0.0439132	pcorr:0.0439132	-	Choren_v00_mik.OX359200.1G487.1	TRINITY_DN21863_c0_g1_i3
1774176	M:5	F:2	p:0.0439132	pcorr:0.0439132	-	Choren_v00_mik.OX359200.1G487.1	TRINITY_DN21863_c0_g1_i3
1774176	M:5	F:2	p:0.0439132	pcorr:0.0439132	-	Choren_v00_mik.OX359200.1G487.1	TRINITY_DN21863_c0_g1_i2
1774176	M:5	F:2	p:0.0439132	pcorr:0.0439132	-	Choren_v00_mik.OX359200.1G487.1	TRINITY_DN21863_c0_g1_i2
1774176	M:5	F:2	p:0.0439132	pcorr:0.0439132	-	Choren_v00_mik.OX359200.1G487.1	TRINITY_DN21863_c0_g1_i2
1774176	M:5	F:2	p:0.0439132	pcorr:0.0439132	-	Choren_v00_mik.OX359200.1G487.1	TRINITY_DN21863_c0_g1_i2
1774176	M:5	F:2	p:0.0439132	pcorr:0.0439132	-	Choren_v00_mik.OX359200.1G487.1	TRINITY_DN21863_c0_g1_i2
1774176	M:5	F:2	p:0.0439132	pcorr:0.0439132	-	Choren_v00_mik.OX359200.1G487.1	TRINITY_DN21863_c0_g1_i1
1774176	M:5	F:2	p:0.0439132	pcorr:0.0439132	-	Choren_v00_mik.OX359200.1G487.1	TRINITY_DN21863_c0_g1_i1
1774176	M:5	F:2	p:0.0439132	pcorr:0.0439132	-	Choren_v00_mik.OX359200.1G487.1	TRINITY_DN21863_c0_g1_i1
1774176	M:5	F:2	p:0.0439132	pcorr:0.0439132	-	Choren_v00_mik.OX359200.1G487.1	TRINITY_DN21863_c0_g1_i1
1774176	M:5	F:2	p:0.0439132	pcorr:0.0439132	-	Choren_v00_mik.OX359200.1G487.1	TRINITY_DN21863_c0_g1_i1
1774176	M:5	F:2	p:0.0439132	pcorr:0.0439132	-	Choren_v00_mik.OX359200.1G487.1	TRINITY_DN21863_c0_g1_i1
1774176	M:5	F:2	p:0.0439132	pcorr:0.0439132	-	Choren_v00_mik.OX359200.1G487.1	TRINITY_DN21863_c0_g1_i4
1774176	M:5	F:2	p:0.0439132	pcorr:0.0439132	-	Choren_v00_mik.OX359200.1G487.1	TRINITY_DN21863_c0_g1_i4
1774176	M:5	F:2	p:0.0439132	pcorr:0.0439132	-	Choren_v00_mik.OX359200.1G487.1	TRINITY_DN21863_c0_g1_i4
1774176	M:5	F:2	p:0.0439132	pcorr:0.0439132	-	Choren_v00_mik.OX359200.1G487.1	TRINITY_DN21863_c0_g1_i4
1774176	M:5	F:2	p:0.0439132	pcorr:0.0439132	-	Choren_v00_mik.OX359200.1G487.1	TRINITY_DN21863_c0_g1_i4
1774176	M:5	F:2	p:0.0439132	pcorr:0.0439132	-	Choren_v00_mik.OX359200.1G487.1	TRINITY_DN21863_c0_g1_i4
1774176	M:5	F:2	p:0.0439132	pcorr:0.0439132	-	Choren_v00_mik.OX359200.1G487.1	TRINITY_DN180555_c0_g1_i1
1774176	M:5	F:2	p:0.0439132	pcorr:0.0439132	-	Choren_v00_mik.OX359200.1G487.1	TRINITY_DN180555_c0_g1_i1
1776036	M:5	F:2	p:0.0439132	pcorr:0.0439132	-	#N/A	TRINITY_DN74500_c0_g2_i1
1776036	M:5	F:2	p:0.0439132	pcorr:0.0439132	-	#N/A	TRINITY_DN28986_c0_g1_i6
1776115	M:5	F:2	p:0.0439132	pcorr:0.0439132	PIF1_DANREATP-dependent DNA helicase PIF1 OS=Danio rerio OX=7955 GN=pif1 PE=2 SV=1	Choren_v00_mik.OX359192.1G580.1	TRINITY_DN38728_c0_g4_i1
1778422	M:5	F:1	p:0.0140786	pcorr:0.0140786	COX1_METSECytochrome c oxidase subunit 1 OS=Metridium senile OX=6116 GN=COI PE=3 SV=1	#N/A	TRINITY_DN1768_c0_g1_i1
1778422	M:5	F:1	p:0.0140786	pcorr:0.0140786	COX1_METSECytochrome c oxidase subunit 1 OS=Metridium senile OX=6116 GN=COI PE=3 SV=1	#N/A	TRINITY_DN1768_c0_g1_i2
1782962	M:5	F:2	p:0.0439132	pcorr:0.0439132	LRMDA_MOUSELeucine-rich melanocyte differentiation-associated protein OS=Mus musculus OX=10090 GN=Lrmda PE=1 SV=1	Choren_v00_mik.OX359197.1G385.1	TRINITY_DN11581_c0_g2_i2
1782962	M:5	F:2	p:0.0439132	pcorr:0.0439132	LRMDA_MOUSELeucine-rich melanocyte differentiation-associated protein OS=Mus musculus OX=10090 GN=Lrmda PE=1 SV=1	Choren_v00_mik.OX359197.1G385.1	TRINITY_DN11581_c0_g2_i1
1782962	M:5	F:2	p:0.0439132	pcorr:0.0439132	LRMDA_MOUSELeucine-rich melanocyte differentiation-associated protein OS=Mus musculus OX=10090 GN=Lrmda PE=1 SV=1	Choren_v00_mik.OX359197.1G385.1	TRINITY_DN11581_c0_g2_i3
1782962	M:5	F:2	p:0.0439132	pcorr:0.0439132	-	Choren_v00_mik.OX359197.1G385.1	TRINITY_DN11581_c0_g1_i1
1783390	M:5	F:2	p:0.0439132	pcorr:0.0439132	-	#N/A	TRINITY_DN69086_c0_g1_i3
1783390	M:5	F:2	p:0.0439132	pcorr:0.0439132	-	#N/A	TRINITY_DN69086_c0_g1_i2
1783390	M:5	F:2	p:0.0439132	pcorr:0.0439132	-	#N/A	TRINITY_DN69086_c0_g1_i1
1783390	M:5	F:2	p:0.0439132	pcorr:0.0439132	-	#N/A	TRINITY_DN6273_c1_g3_i2
1783390	M:5	F:2	p:0.0439132	pcorr:0.0439132	-	#N/A	TRINITY_DN69086_c0_g1_i12
1783442	M:5	F:2	p:0.0439132	pcorr:0.0439132	PO21_NASVIRetrovirus-related Pol polyprotein from type-1 retrotransposable element R2 (Fragment) OS=Nasonia vitripennis OX=7425 PE=4 SV=2	Choren_v00_mik.OX359192.1G520.1	TRINITY_DN1825_c1_g1_i12
1783442	M:5	F:2	p:0.0439132	pcorr:0.0439132	PO21_NASVIRetrovirus-related Pol polyprotein from type-1 retrotransposable element R2 (Fragment) OS=Nasonia vitripennis OX=7425 PE=4 SV=2	Choren_v00_mik.OX359192.1G520.1	TRINITY_DN1825_c1_g1_i4
1783442	M:5	F:2	p:0.0439132	pcorr:0.0439132	PO21_NASVIRetrovirus-related Pol polyprotein from type-1 retrotransposable element R2 (Fragment) OS=Nasonia vitripennis OX=7425 PE=4 SV=2	Choren_v00_mik.OX359192.1G520.1	TRINITY_DN1825_c1_g1_i15
1783442	M:5	F:2	p:0.0439132	pcorr:0.0439132	PO21_NASVIRetrovirus-related Pol polyprotein from type-1 retrotransposable element R2 (Fragment) OS=Nasonia vitripennis OX=7425 PE=4 SV=2	Choren_v00_mik.OX359192.1G520.1	TRINITY_DN1825_c1_g1_i6
1783442	M:5	F:2	p:0.0439132	pcorr:0.0439132	-	Choren_v00_mik.OX359192.1G520.1	TRINITY_DN98110_c0_g3_i1
1794496	M:2	F:11	p:0.0439132	pcorr:0.0439132	-	#N/A	TRINITY_DN37763_c0_g1_i2
1794496	M:2	F:11	p:0.0439132	pcorr:0.0439132	-	#N/A	TRINITY_DN37763_c0_g1_i1
1794496	M:2	F:11	p:0.0439132	pcorr:0.0439132	-	#N/A	TRINITY_DN37763_c0_g1_i3
1794496	M:2	F:11	p:0.0439132	pcorr:0.0439132	-	#N/A	TRINITY_DN256241_c0_g1_i1
1794496	M:2	F:11	p:0.0439132	pcorr:0.0439132	-	#N/A	TRINITY_DN294318_c0_g1_i1
1795725	M:5	F:2	p:0.0439132	pcorr:0.0439132	DCUP_PONABUroporphyrinogen decarboxylase OS=Pongo abelii OX=9601 GN=UROD PE=2 SV=1	Choren_v00_mik.OX359201.1G762.1	TRINITY_DN2545_c0_g1_i14
1795725	M:5	F:2	p:0.0439132	pcorr:0.0439132	DCUP_PONABUroporphyrinogen decarboxylase OS=Pongo abelii OX=9601 GN=UROD PE=2 SV=1	Choren_v00_mik.OX359201.1G762.1	TRINITY_DN2545_c0_g1_i9
1795725	M:5	F:2	p:0.0439132	pcorr:0.0439132	-	Choren_v00_mik.OX359201.1G762.1	TRINITY_DN2545_c0_g1_i8
1795725	M:5	F:2	p:0.0439132	pcorr:0.0439132	DCUP_PONABUroporphyrinogen decarboxylase OS=Pongo abelii OX=9601 GN=UROD PE=2 SV=1	Choren_v00_mik.OX359201.1G762.1	TRINITY_DN2545_c0_g1_i5
1795725	M:5	F:2	p:0.0439132	pcorr:0.0439132	-	Choren_v00_mik.OX359201.1G762.1	TRINITY_DN2545_c0_g1_i2
1802390	M:6	F:3	p:0.0267948	pcorr:0.0267948	AAPK2_PONAB5'-AMP-activated protein kinase catalytic subunit alpha-2 OS=Pongo abelii OX=9601 GN=PRKAA2 PE=2 SV=1	Choren_v00_mik.OX359197.1G1132.1	TRINITY_DN1804_c0_g1_i26
1802390	M:6	F:3	p:0.0267948	pcorr:0.0267948	AAPK2_PONAB5'-AMP-activated protein kinase catalytic subunit alpha-2 OS=Pongo abelii OX=9601 GN=PRKAA2 PE=2 SV=1	Choren_v00_mik.OX359197.1G1132.1	TRINITY_DN1804_c0_g1_i14
1802390	M:6	F:3	p:0.0267948	pcorr:0.0267948	AAPK2_PONAB5'-AMP-activated protein kinase catalytic subunit alpha-2 OS=Pongo abelii OX=9601 GN=PRKAA2 PE=2 SV=1	Choren_v00_mik.OX359197.1G1132.1	TRINITY_DN1804_c0_g1_i25
1802390	M:6	F:3	p:0.0267948	pcorr:0.0267948	AAPK2_PONAB5'-AMP-activated protein kinase catalytic subunit alpha-2 OS=Pongo abelii OX=9601 GN=PRKAA2 PE=2 SV=1	Choren_v00_mik.OX359197.1G1132.1	TRINITY_DN1804_c0_g1_i33
1802390	M:6	F:3	p:0.0267948	pcorr:0.0267948	AAPK2_PONAB5'-AMP-activated protein kinase catalytic subunit alpha-2 OS=Pongo abelii OX=9601 GN=PRKAA2 PE=2 SV=1	Choren_v00_mik.OX359197.1G1132.1	TRINITY_DN1804_c0_g1_i4
1804619	M:5	F:2	p:0.0439132	pcorr:0.0439132	LPAT2_BRANA1-acyl-sn-glycerol-3-phosphate acyltransferase 2 OS=Brassica napus OX=3708 GN=LPAT2 PE=2 SV=1	#N/A	TRINITY_DN80_c0_g1_i12
1804619	M:5	F:2	p:0.0439132	pcorr:0.0439132	-	#N/A	TRINITY_DN34948_c0_g1_i1
1804957	M:5	F:2	p:0.0439132	pcorr:0.0439132	PKDCC_HUMANExtracellular tyrosine-protein kinase PKDCC OS=Homo sapiens OX=9606 GN=PKDCC PE=1 SV=2	#N/A	TRINITY_DN2314_c0_g1_i4
1804957	M:5	F:2	p:0.0439132	pcorr:0.0439132	PKDCC_HUMANExtracellular tyrosine-protein kinase PKDCC OS=Homo sapiens OX=9606 GN=PKDCC PE=1 SV=2	#N/A	TRINITY_DN2314_c0_g1_i17
1804957	M:5	F:2	p:0.0439132	pcorr:0.0439132	PKDCC_HUMANExtracellular tyrosine-protein kinase PKDCC OS=Homo sapiens OX=9606 GN=PKDCC PE=1 SV=2	#N/A	TRINITY_DN2314_c0_g1_i2
1804957	M:5	F:2	p:0.0439132	pcorr:0.0439132	MOX12_DROMEMOXD1 homolog 2 OS=Drosophila melanogaster OX=7227 GN=olf413 PE=2 SV=1	#N/A	TRINITY_DN2314_c0_g1_i15
1804957	M:5	F:2	p:0.0439132	pcorr:0.0439132	PKDCC_HUMANExtracellular tyrosine-protein kinase PKDCC OS=Homo sapiens OX=9606 GN=PKDCC PE=1 SV=2	#N/A	TRINITY_DN2314_c0_g1_i32
1806310	M:6	F:3	p:0.0267948	pcorr:0.0267948	-	#N/A	TRINITY_DN141486_c0_g1_i1
1817472	M:0	F:10	p:0.00491056	pcorr:0.00491056	-	#N/A	TRINITY_DN23599_c0_g1_i4
1817472	M:0	F:10	p:0.00491056	pcorr:0.00491056	-	#N/A	TRINITY_DN23599_c0_g1_i7
1817472	M:0	F:10	p:0.00491056	pcorr:0.00491056	-	#N/A	TRINITY_DN30307_c0_g1_i1
1817472	M:0	F:10	p:0.00491056	pcorr:0.00491056	-	#N/A	TRINITY_DN151657_c0_g2_i3
1817472	M:0	F:10	p:0.00491056	pcorr:0.00491056	-	#N/A	TRINITY_DN151657_c0_g2_i1
1817931	M:7	F:5	p:0.0277373	pcorr:0.0277373	TXND3_HELCRThioredoxin domain-containing protein 3 homolog OS=Heliocidaris crassispina OX=1043166 GN=NME8 PE=1 SV=1	#N/A	TRINITY_DN3750_c0_g1_i27
1817931	M:7	F:5	p:0.0277373	pcorr:0.0277373	TXND3_HELCRThioredoxin domain-containing protein 3 homolog OS=Heliocidaris crassispina OX=1043166 GN=NME8 PE=1 SV=1	#N/A	TRINITY_DN3750_c0_g1_i19
1817931	M:7	F:5	p:0.0277373	pcorr:0.0277373	TXND3_HELCRThioredoxin domain-containing protein 3 homolog OS=Heliocidaris crassispina OX=1043166 GN=NME8 PE=1 SV=1	#N/A	TRINITY_DN3750_c0_g1_i10
1817931	M:7	F:5	p:0.0277373	pcorr:0.0277373	TXND3_HELCRThioredoxin domain-containing protein 3 homolog OS=Heliocidaris crassispina OX=1043166 GN=NME8 PE=1 SV=1	#N/A	TRINITY_DN3750_c0_g1_i28
1818024	M:6	F:3	p:0.0267948	pcorr:0.0267948	-	#N/A	TRINITY_DN32179_c0_g1_i1
1818024	M:6	F:3	p:0.0267948	pcorr:0.0267948	-	#N/A	TRINITY_DN32179_c0_g1_i2
1818024	M:6	F:3	p:0.0267948	pcorr:0.0267948	-	#N/A	TRINITY_DN32179_c0_g2_i1
1819550	M:2	F:11	p:0.0439132	pcorr:0.0439132	SNF5_BOVINSWI/SNF-related matrix-associated actin-dependent regulator of chromatin subfamily B member 1 OS=Bos taurus OX=9913 GN=SMARCB1 PE=2 SV=1	Choren_v00_mik.OX359202.1G877.2	TRINITY_DN2881_c0_g1_i15
1819550	M:2	F:11	p:0.0439132	pcorr:0.0439132	SNF5_XENLASWI/SNF-related matrix-associated actin-dependent regulator of chromatin subfamily B member 1 OS=Xenopus laevis OX=8355 GN=smarcb1 PE=2 SV=1	Choren_v00_mik.OX359202.1G877.2	TRINITY_DN2881_c0_g1_i17
1819550	M:2	F:11	p:0.0439132	pcorr:0.0439132	SNF5_XENLASWI/SNF-related matrix-associated actin-dependent regulator of chromatin subfamily B member 1 OS=Xenopus laevis OX=8355 GN=smarcb1 PE=2 SV=1	Choren_v00_mik.OX359202.1G877.2	TRINITY_DN2881_c0_g1_i10
1819550	M:2	F:11	p:0.0439132	pcorr:0.0439132	SNF5_BOVINSWI/SNF-related matrix-associated actin-dependent regulator of chromatin subfamily B member 1 OS=Bos taurus OX=9913 GN=SMARCB1 PE=2 SV=1	Choren_v00_mik.OX359202.1G877.2	TRINITY_DN2881_c0_g1_i12
1819550	M:2	F:11	p:0.0439132	pcorr:0.0439132	-	Choren_v00_mik.OX359202.1G877.2	TRINITY_DN142815_c0_g1_i1
1826192	M:5	F:2	p:0.0439132	pcorr:0.0439132	-	#N/A	TRINITY_DN1829_c2_g1_i2
1826192	M:5	F:2	p:0.0439132	pcorr:0.0439132	-	#N/A	TRINITY_DN1829_c2_g1_i21
1826192	M:5	F:2	p:0.0439132	pcorr:0.0439132	-	#N/A	TRINITY_DN4081_c0_g2_i1
1826192	M:5	F:2	p:0.0439132	pcorr:0.0439132	-	#N/A	TRINITY_DN4081_c0_g2_i2
1826192	M:5	F:2	p:0.0439132	pcorr:0.0439132	-	#N/A	TRINITY_DN32231_c0_g1_i7
1827366	M:5	F:1	p:0.0140786	pcorr:0.0140786	SYV_SOLUEValine--tRNA ligase OS=Solibacter usitatus (strain Ellin6076) OX=234267 GN=valS PE=3 SV=1	Choren_v00_mik.OX359201.1G975.1	TRINITY_DN87413_c0_g2_i2
1836236	M:5	F:1	p:0.0140786	pcorr:0.0140786	SPT48_HUMANSpermatogenesis-associated protein 48 OS=Homo sapiens OX=9606 GN=SPATA48 PE=2 SV=2	Choren_v00_mik.OX359199.1G14.1	TRINITY_DN4537_c0_g1_i13
1836236	M:5	F:1	p:0.0140786	pcorr:0.0140786	SPT48_HUMANSpermatogenesis-associated protein 48 OS=Homo sapiens OX=9606 GN=SPATA48 PE=2 SV=2	Choren_v00_mik.OX359199.1G14.1	TRINITY_DN4537_c0_g1_i10
1836236	M:5	F:1	p:0.0140786	pcorr:0.0140786	SPT48_HUMANSpermatogenesis-associated protein 48 OS=Homo sapiens OX=9606 GN=SPATA48 PE=2 SV=2	Choren_v00_mik.OX359199.1G14.1	TRINITY_DN4537_c0_g1_i8
1836236	M:5	F:1	p:0.0140786	pcorr:0.0140786	SPT48_HUMANSpermatogenesis-associated protein 48 OS=Homo sapiens OX=9606 GN=SPATA48 PE=2 SV=2	Choren_v00_mik.OX359199.1G14.1	TRINITY_DN4537_c0_g1_i2
1836236	M:5	F:1	p:0.0140786	pcorr:0.0140786	SPT48_HUMANSpermatogenesis-associated protein 48 OS=Homo sapiens OX=9606 GN=SPATA48 PE=2 SV=2	Choren_v00_mik.OX359199.1G14.1	TRINITY_DN4537_c0_g1_i12
1836998	M:5	F:2	p:0.0439132	pcorr:0.0439132	-	#N/A	TRINITY_DN86996_c0_g1_i2
1836998	M:5	F:2	p:0.0439132	pcorr:0.0439132	-	#N/A	TRINITY_DN86996_c0_g1_i5
1836998	M:5	F:2	p:0.0439132	pcorr:0.0439132	-	#N/A	TRINITY_DN86996_c0_g1_i1
1836998	M:5	F:2	p:0.0439132	pcorr:0.0439132	-	#N/A	TRINITY_DN143466_c0_g1_i1
1838054	M:5	F:2	p:0.0439132	pcorr:0.0439132	-	#N/A	TRINITY_DN5132_c0_g1_i1
1838054	M:5	F:2	p:0.0439132	pcorr:0.0439132	-	#N/A	TRINITY_DN5132_c0_g1_i2
1838054	M:5	F:2	p:0.0439132	pcorr:0.0439132	-	#N/A	TRINITY_DN21572_c0_g3_i1
1838054	M:5	F:2	p:0.0439132	pcorr:0.0439132	-	#N/A	TRINITY_DN47729_c0_g1_i1
1838054	M:5	F:2	p:0.0439132	pcorr:0.0439132	ATGA1_DANREAutophagy-related protein 101 OS=Danio rerio OX=7955 GN=atg101 PE=2 SV=1	#N/A	TRINITY_DN1725_c0_g1_i3
1839423	M:5	F:2	p:0.0439132	pcorr:0.0439132	Y1491_CALS4DegV domain-containing protein TTE1491 OS=Caldanaerobacter subterraneus subsp. tengcongensis (strain DSM 15242 / JCM 11007 / NBRC 100824 / MB4) OX=273068 GN=TTE1491 PE=3 SV=1	#N/A	TRINITY_DN45812_c0_g1_i1
1839833	M:5	F:0	p:0.00290775	pcorr:0.00290775	LMBD2_HUMANG-protein coupled receptor-associated protein LMBRD2 OS=Homo sapiens OX=9606 GN=LMBRD2 PE=1 SV=1	#N/A	TRINITY_DN2549_c0_g1_i1
1839833	M:5	F:0	p:0.00290775	pcorr:0.00290775	LMBD2_HUMANG-protein coupled receptor-associated protein LMBRD2 OS=Homo sapiens OX=9606 GN=LMBRD2 PE=1 SV=1	#N/A	TRINITY_DN2549_c0_g1_i13
1839833	M:5	F:0	p:0.00290775	pcorr:0.00290775	LMBD2_HUMANG-protein coupled receptor-associated protein LMBRD2 OS=Homo sapiens OX=9606 GN=LMBRD2 PE=1 SV=1	#N/A	TRINITY_DN2549_c0_g1_i9
1839833	M:5	F:0	p:0.00290775	pcorr:0.00290775	LMBD2_XENLAG-protein coupled receptor-associated protein LMBRD2 OS=Xenopus laevis OX=8355 GN=lmbrd2 PE=2 SV=1	#N/A	TRINITY_DN2549_c0_g1_i2
1839833	M:5	F:0	p:0.00290775	pcorr:0.00290775	LMBD2_CHICKG-protein coupled receptor-associated protein LMBRD2 OS=Gallus gallus OX=9031 GN=LMBRD2 PE=2 SV=1	#N/A	TRINITY_DN2549_c0_g1_i3
1841967	M:4	F:0	p:0.0138458	pcorr:0.0138458	RIOK2_HUMANSerine/threonine-protein kinase RIO2 OS=Homo sapiens OX=9606 GN=RIOK2 PE=1 SV=2	Choren_v00_mik.OX359192.1G680.1	TRINITY_DN2763_c0_g2_i5
1841967	M:4	F:0	p:0.0138458	pcorr:0.0138458	RIOK2_HUMANSerine/threonine-protein kinase RIO2 OS=Homo sapiens OX=9606 GN=RIOK2 PE=1 SV=2	Choren_v00_mik.OX359192.1G680.1	TRINITY_DN2763_c0_g2_i6
1841967	M:4	F:0	p:0.0138458	pcorr:0.0138458	RIOK2_HUMANSerine/threonine-protein kinase RIO2 OS=Homo sapiens OX=9606 GN=RIOK2 PE=1 SV=2	Choren_v00_mik.OX359192.1G680.1	TRINITY_DN2763_c0_g2_i2
1841967	M:4	F:0	p:0.0138458	pcorr:0.0138458	RIOK2_HUMANSerine/threonine-protein kinase RIO2 OS=Homo sapiens OX=9606 GN=RIOK2 PE=1 SV=2	Choren_v00_mik.OX359192.1G680.1	TRINITY_DN2763_c0_g2_i1
1846286	M:2	F:12	p:0.0140786	pcorr:0.0140786	-	Choren_v00_mik.OX359192.1G235.1	TRINITY_DN65_c0_g1_i8
1846286	M:2	F:12	p:0.0140786	pcorr:0.0140786	-	Choren_v00_mik.OX359192.1G235.1	TRINITY_DN52484_c1_g1_i2
1846286	M:2	F:12	p:0.0140786	pcorr:0.0140786	-	Choren_v00_mik.OX359192.1G235.1	TRINITY_DN52484_c1_g1_i1
1846286	M:2	F:12	p:0.0140786	pcorr:0.0140786	-	Choren_v00_mik.OX359192.1G235.1	TRINITY_DN52484_c1_g1_i5
1846286	M:2	F:12	p:0.0140786	pcorr:0.0140786	-	Choren_v00_mik.OX359192.1G235.1	TRINITY_DN52484_c1_g1_i9
1847337	M:5	F:2	p:0.0439132	pcorr:0.0439132	-	Choren_v00_mik.OX359194.1G787.1	TRINITY_DN4109_c0_g2_i4
1847337	M:5	F:2	p:0.0439132	pcorr:0.0439132	-	Choren_v00_mik.OX359194.1G787.1	TRINITY_DN4109_c0_g2_i13
1847337	M:5	F:2	p:0.0439132	pcorr:0.0439132	-	Choren_v00_mik.OX359194.1G787.1	TRINITY_DN4109_c0_g2_i5
1847337	M:5	F:2	p:0.0439132	pcorr:0.0439132	-	Choren_v00_mik.OX359194.1G787.1	TRINITY_DN4109_c0_g2_i9
1847337	M:5	F:2	p:0.0439132	pcorr:0.0439132	-	Choren_v00_mik.OX359194.1G787.1	TRINITY_DN4109_c0_g2_i3
1848365	M:2	F:13	p:0.00290775	pcorr:0.00290775	-	#N/A	TRINITY_DN65536_c1_g1_i1
1854770	M:5	F:2	p:0.0439132	pcorr:0.0439132	CKAP5_MOUSECytoskeleton-associated protein 5 OS=Mus musculus OX=10090 GN=Ckap5 PE=1 SV=1	Choren_v00_mik.OX359189.1G871.1	TRINITY_DN3191_c0_g1_i15
1854770	M:5	F:2	p:0.0439132	pcorr:0.0439132	CKAP5_MOUSECytoskeleton-associated protein 5 OS=Mus musculus OX=10090 GN=Ckap5 PE=1 SV=1	Choren_v00_mik.OX359189.1G871.1	TRINITY_DN3191_c0_g1_i6
1854770	M:5	F:2	p:0.0439132	pcorr:0.0439132	CKAP5_MOUSECytoskeleton-associated protein 5 OS=Mus musculus OX=10090 GN=Ckap5 PE=1 SV=1	Choren_v00_mik.OX359189.1G871.1	TRINITY_DN3191_c0_g1_i14
1854770	M:5	F:2	p:0.0439132	pcorr:0.0439132	CKAP5_MOUSECytoskeleton-associated protein 5 OS=Mus musculus OX=10090 GN=Ckap5 PE=1 SV=1	Choren_v00_mik.OX359189.1G871.1	TRINITY_DN3191_c0_g1_i3
1854770	M:5	F:2	p:0.0439132	pcorr:0.0439132	CKAP5_MOUSECytoskeleton-associated protein 5 OS=Mus musculus OX=10090 GN=Ckap5 PE=1 SV=1	Choren_v00_mik.OX359189.1G871.1	TRINITY_DN3191_c0_g1_i4
1858451	M:0	F:13	p:6.87148e-05	pcorr:6.87148e-05	-	Choren_v00_mik.OX359194.1G538.1	TRINITY_DN86408_c0_g1_i1
1858451	M:0	F:13	p:6.87148e-05	pcorr:6.87148e-05	-	Choren_v00_mik.OX359194.1G538.1	TRINITY_DN86408_c0_g1_i5
1858451	M:0	F:13	p:6.87148e-05	pcorr:6.87148e-05	-	Choren_v00_mik.OX359194.1G538.1	TRINITY_DN86408_c0_g1_i3
1859748	M:0	F:13	p:6.87148e-05	pcorr:6.87148e-05	-	Choren_v00_mik.OX359192.1G235.1	TRINITY_DN65_c0_g1_i8
1859748	M:0	F:13	p:6.87148e-05	pcorr:6.87148e-05	-	Choren_v00_mik.OX359192.1G235.1	TRINITY_DN26574_c0_g1_i4
1859748	M:0	F:13	p:6.87148e-05	pcorr:6.87148e-05	-	Choren_v00_mik.OX359192.1G235.1	TRINITY_DN65_c0_g1_i2
1859748	M:0	F:13	p:6.87148e-05	pcorr:6.87148e-05	-	Choren_v00_mik.OX359192.1G235.1	TRINITY_DN2928_c2_g1_i1
1859748	M:0	F:13	p:6.87148e-05	pcorr:6.87148e-05	GPTC3_MOUSEG patch domain-containing protein 3 OS=Mus musculus OX=10090 GN=Gpatch3 PE=2 SV=1	Choren_v00_mik.OX359192.1G235.1	TRINITY_DN946_c0_g1_i19
1860205	M:5	F:2	p:0.0439132	pcorr:0.0439132	POL4_DROMERetrovirus-related Pol polyprotein from transposon 412 OS=Drosophila melanogaster OX=7227 GN=POL PE=4 SV=1	Choren_v00_mik.OX359200.1G514.1	TRINITY_DN9160_c0_g2_i6
1860205	M:5	F:2	p:0.0439132	pcorr:0.0439132	YI31B_YEASTTransposon Ty3-I Gag-Pol polyprotein OS=Saccharomyces cerevisiae (strain ATCC 204508 / S288c) OX=559292 GN=TY3B-I PE=1 SV=2	Choren_v00_mik.OX359200.1G514.1	TRINITY_DN9160_c0_g2_i5
1860205	M:5	F:2	p:0.0439132	pcorr:0.0439132	POL4_DROMERetrovirus-related Pol polyprotein from transposon 412 OS=Drosophila melanogaster OX=7227 GN=POL PE=4 SV=1	Choren_v00_mik.OX359200.1G514.1	TRINITY_DN9160_c0_g2_i9
1860205	M:5	F:2	p:0.0439132	pcorr:0.0439132	-	Choren_v00_mik.OX359200.1G514.1	TRINITY_DN85643_c0_g1_i1
1860205	M:5	F:2	p:0.0439132	pcorr:0.0439132	-	Choren_v00_mik.OX359200.1G514.1	TRINITY_DN6624_c0_g1_i1
1864035	M:4	F:0	p:0.0138458	pcorr:0.0138458	-	#N/A	TRINITY_DN78058_c0_g1_i7
1864035	M:4	F:0	p:0.0138458	pcorr:0.0138458	-	#N/A	TRINITY_DN78058_c0_g1_i6
1864035	M:4	F:0	p:0.0138458	pcorr:0.0138458	-	#N/A	TRINITY_DN1928_c2_g1_i3
1864035	M:4	F:0	p:0.0138458	pcorr:0.0138458	-	#N/A	TRINITY_DN78058_c0_g1_i3
1864035	M:4	F:0	p:0.0138458	pcorr:0.0138458	-	#N/A	TRINITY_DN1928_c2_g1_i2
1865807	M:5	F:2	p:0.0439132	pcorr:0.0439132	-	Choren_v00_mik.OX359192.1G235.1	TRINITY_DN2928_c2_g1_i1
1865807	M:5	F:2	p:0.0439132	pcorr:0.0439132	-	Choren_v00_mik.OX359192.1G235.1	TRINITY_DN2928_c2_g1_i3
1865807	M:5	F:2	p:0.0439132	pcorr:0.0439132	-	Choren_v00_mik.OX359192.1G235.1	TRINITY_DN2928_c2_g1_i2
1865807	M:5	F:2	p:0.0439132	pcorr:0.0439132	SLX1_MOUSEStructure-specific endonuclease subunit SLX1 OS=Mus musculus OX=10090 GN=Slx1b PE=2 SV=1	Choren_v00_mik.OX359192.1G235.1	TRINITY_DN29139_c0_g1_i2
1865807	M:5	F:2	p:0.0439132	pcorr:0.0439132	SLX1_XENLAStructure-specific endonuclease subunit slx1 OS=Xenopus laevis OX=8355 GN=slx1a PE=2 SV=1	Choren_v00_mik.OX359192.1G235.1	TRINITY_DN29139_c0_g1_i3
1869977	M:1	F:10	p:0.0267948	pcorr:0.0267948	-	Choren_v00_mik.OX359192.1G235.1	TRINITY_DN195682_c0_g1_i3
1869977	M:1	F:10	p:0.0267948	pcorr:0.0267948	-	Choren_v00_mik.OX359192.1G235.1	TRINITY_DN195682_c0_g1_i1
1869977	M:1	F:10	p:0.0267948	pcorr:0.0267948	PTPRT_HUMANReceptor-type tyrosine-protein phosphatase T OS=Homo sapiens OX=9606 GN=PTPRT PE=1 SV=6	Choren_v00_mik.OX359192.1G235.1	TRINITY_DN1562_c0_g1_i16
1869977	M:1	F:10	p:0.0267948	pcorr:0.0267948	PTPRT_HUMANReceptor-type tyrosine-protein phosphatase T OS=Homo sapiens OX=9606 GN=PTPRT PE=1 SV=6	Choren_v00_mik.OX359192.1G235.1	TRINITY_DN1562_c0_g1_i12
1869977	M:1	F:10	p:0.0267948	pcorr:0.0267948	PTPRT_HUMANReceptor-type tyrosine-protein phosphatase T OS=Homo sapiens OX=9606 GN=PTPRT PE=1 SV=6	Choren_v00_mik.OX359192.1G235.1	TRINITY_DN1562_c0_g1_i15
1873679	M:5	F:1	p:0.0140786	pcorr:0.0140786	-	Choren_v00_mik.OX359197.1G745.1	TRINITY_DN66901_c0_g1_i1
1873679	M:5	F:1	p:0.0140786	pcorr:0.0140786	-	Choren_v00_mik.OX359197.1G745.1	TRINITY_DN7208_c0_g1_i5
1873679	M:5	F:1	p:0.0140786	pcorr:0.0140786	NAC2_MOUSESodium/calcium exchanger 2 OS=Mus musculus OX=10090 GN=Slc8a2 PE=1 SV=1	Choren_v00_mik.OX359197.1G745.1	TRINITY_DN7208_c0_g1_i8
1873679	M:5	F:1	p:0.0140786	pcorr:0.0140786	NAC2_MOUSESodium/calcium exchanger 2 OS=Mus musculus OX=10090 GN=Slc8a2 PE=1 SV=1	Choren_v00_mik.OX359197.1G745.1	TRINITY_DN7208_c0_g1_i7
1876338	M:2	F:12	p:0.0140786	pcorr:0.0140786	-	Choren_v00_mik.OX359197.1G128.1	TRINITY_DN65_c0_g2_i2
1876338	M:2	F:12	p:0.0140786	pcorr:0.0140786	-	Choren_v00_mik.OX359197.1G128.1	TRINITY_DN65_c0_g2_i3
1876338	M:2	F:12	p:0.0140786	pcorr:0.0140786	-	Choren_v00_mik.OX359197.1G128.1	TRINITY_DN63588_c0_g1_i7
1876338	M:2	F:12	p:0.0140786	pcorr:0.0140786	-	Choren_v00_mik.OX359197.1G128.1	TRINITY_DN63588_c0_g1_i8
1876338	M:2	F:12	p:0.0140786	pcorr:0.0140786	-	Choren_v00_mik.OX359197.1G128.1	TRINITY_DN93135_c2_g1_i1
1877186	M:7	F:5	p:0.0277373	pcorr:0.0277373	-	Choren_v00_mik.OX359192.1G235.1	TRINITY_DN5390_c0_g1_i8
1877186	M:7	F:5	p:0.0277373	pcorr:0.0277373	-	Choren_v00_mik.OX359192.1G235.1	TRINITY_DN5390_c0_g1_i3
1877186	M:7	F:5	p:0.0277373	pcorr:0.0277373	-	Choren_v00_mik.OX359192.1G235.1	TRINITY_DN3078_c0_g1_i1
1877186	M:7	F:5	p:0.0277373	pcorr:0.0277373	EPS15_DICDIEpidermal growth factor receptor substrate 15 homolog OS=Dictyostelium discoideum OX=44689 GN=eps15 PE=1 SV=1	Choren_v00_mik.OX359192.1G235.1	TRINITY_DN3078_c0_g1_i19
1877186	M:7	F:5	p:0.0277373	pcorr:0.0277373	EPS15_DICDIEpidermal growth factor receptor substrate 15 homolog OS=Dictyostelium discoideum OX=44689 GN=eps15 PE=1 SV=1	Choren_v00_mik.OX359192.1G235.1	TRINITY_DN3078_c0_g1_i15
1877348	M:6	F:3	p:0.0267948	pcorr:0.0267948	-	#N/A	TRINITY_DN70528_c0_g3_i1
1881185	M:0	F:13	p:6.87148e-05	pcorr:6.87148e-05	-	Choren_v00_mik.OX359189.1G1708.1	TRINITY_DN2298_c0_g1_i1
1881185	M:0	F:13	p:6.87148e-05	pcorr:6.87148e-05	-	Choren_v00_mik.OX359189.1G1708.1	TRINITY_DN2298_c0_g1_i11
1881185	M:0	F:13	p:6.87148e-05	pcorr:6.87148e-05	-	Choren_v00_mik.OX359189.1G1708.1	TRINITY_DN2298_c0_g1_i5
1881185	M:0	F:13	p:6.87148e-05	pcorr:6.87148e-05	-	Choren_v00_mik.OX359189.1G1708.1	TRINITY_DN2298_c0_g1_i14
1881185	M:0	F:13	p:6.87148e-05	pcorr:6.87148e-05	-	Choren_v00_mik.OX359189.1G1708.1	TRINITY_DN2298_c0_g1_i9
1884476	M:5	F:0	p:0.00290775	pcorr:0.00290775	-	#N/A	TRINITY_DN160768_c0_g1_i1
1885339	M:5	F:1	p:0.0140786	pcorr:0.0140786	-	#N/A	TRINITY_DN8215_c0_g1_i6
1885339	M:5	F:1	p:0.0140786	pcorr:0.0140786	-	#N/A	TRINITY_DN8215_c0_g1_i3
1886611	M:6	F:3	p:0.0267948	pcorr:0.0267948	-	#N/A	TRINITY_DN38896_c0_g1_i5
1886611	M:6	F:3	p:0.0267948	pcorr:0.0267948	-	#N/A	TRINITY_DN38896_c0_g1_i2
1886644	M:1	F:10	p:0.0267948	pcorr:0.0267948	PLXA3_HUMANPlexin-A3 OS=Homo sapiens OX=9606 GN=PLXNA3 PE=1 SV=3	Choren_v00_mik.OX359192.1G181.1	TRINITY_DN3711_c0_g2_i20
1886644	M:1	F:10	p:0.0267948	pcorr:0.0267948	PLXA4_MOUSEPlexin-A4 OS=Mus musculus OX=10090 GN=Plxna4 PE=1 SV=3	Choren_v00_mik.OX359192.1G181.1	TRINITY_DN3711_c0_g2_i7
1886644	M:1	F:10	p:0.0267948	pcorr:0.0267948	PLXA3_HUMANPlexin-A3 OS=Homo sapiens OX=9606 GN=PLXNA3 PE=1 SV=3	Choren_v00_mik.OX359192.1G181.1	TRINITY_DN3711_c0_g2_i21
1886644	M:1	F:10	p:0.0267948	pcorr:0.0267948	PLXB1_MOUSEPlexin-B1 OS=Mus musculus OX=10090 GN=Plxnb1 PE=1 SV=2	Choren_v00_mik.OX359192.1G181.1	TRINITY_DN3711_c0_g2_i19
1886644	M:1	F:10	p:0.0267948	pcorr:0.0267948	PLXA3_HUMANPlexin-A3 OS=Homo sapiens OX=9606 GN=PLXNA3 PE=1 SV=3	Choren_v00_mik.OX359192.1G181.1	TRINITY_DN3711_c0_g2_i6
1887272	M:0	F:13	p:6.87148e-05	pcorr:6.87148e-05	PEAM2_ARATHPhosphomethylethanolamine N-methyltransferase OS=Arabidopsis thaliana OX=3702 GN=NMT2 PE=1 SV=2	#N/A	TRINITY_DN10665_c0_g1_i6
1887272	M:0	F:13	p:6.87148e-05	pcorr:6.87148e-05	-	#N/A	TRINITY_DN10665_c0_g1_i3
1887272	M:0	F:13	p:6.87148e-05	pcorr:6.87148e-05	PEAM2_ARATHPhosphomethylethanolamine N-methyltransferase OS=Arabidopsis thaliana OX=3702 GN=NMT2 PE=1 SV=2	#N/A	TRINITY_DN10665_c0_g1_i7
1887272	M:0	F:13	p:6.87148e-05	pcorr:6.87148e-05	-	#N/A	TRINITY_DN15237_c0_g1_i10
1887272	M:0	F:13	p:6.87148e-05	pcorr:6.87148e-05	-	#N/A	TRINITY_DN15237_c0_g1_i5
1888093	M:0	F:12	p:0.000399051	pcorr:0.000399051	-	Choren_v00_mik.OX359191.1G421.1	TRINITY_DN51938_c0_g1_i4
1888093	M:0	F:12	p:0.000399051	pcorr:0.000399051	-	Choren_v00_mik.OX359191.1G421.1	TRINITY_DN51938_c0_g1_i6
1888093	M:0	F:12	p:0.000399051	pcorr:0.000399051	-	Choren_v00_mik.OX359191.1G421.1	TRINITY_DN51938_c0_g1_i3
1889935	M:5	F:2	p:0.0439132	pcorr:0.0439132	-	#N/A	TRINITY_DN7742_c1_g1_i1
1889935	M:5	F:2	p:0.0439132	pcorr:0.0439132	-	#N/A	TRINITY_DN6273_c0_g1_i2
1891220	M:5	F:2	p:0.0439132	pcorr:0.0439132	-	#N/A	TRINITY_DN175104_c0_g1_i2
1891858	M:5	F:1	p:0.0140786	pcorr:0.0140786	-	#N/A	TRINITY_DN48530_c0_g1_i3
1891858	M:5	F:1	p:0.0140786	pcorr:0.0140786	-	#N/A	TRINITY_DN48530_c0_g1_i6
1891858	M:5	F:1	p:0.0140786	pcorr:0.0140786	-	#N/A	TRINITY_DN48530_c0_g1_i9
1891858	M:5	F:1	p:0.0140786	pcorr:0.0140786	-	#N/A	TRINITY_DN48530_c0_g1_i2
1891858	M:5	F:1	p:0.0140786	pcorr:0.0140786	-	#N/A	TRINITY_DN48530_c0_g1_i1
1893638	M:5	F:2	p:0.0439132	pcorr:0.0439132	-	#N/A	TRINITY_DN64577_c0_g1_i1
1893638	M:5	F:2	p:0.0439132	pcorr:0.0439132	-	#N/A	TRINITY_DN64577_c0_g1_i6
1893638	M:5	F:2	p:0.0439132	pcorr:0.0439132	-	#N/A	TRINITY_DN64577_c0_g1_i4
1893638	M:5	F:2	p:0.0439132	pcorr:0.0439132	-	#N/A	TRINITY_DN64577_c0_g1_i2
1893638	M:5	F:2	p:0.0439132	pcorr:0.0439132	-	#N/A	TRINITY_DN64577_c0_g1_i5
1894328	M:0	F:13	p:6.87148e-05	pcorr:6.87148e-05	-	Choren_v00_mik.OX359197.1G452.1	TRINITY_DN2447_c0_g1_i12
1894328	M:0	F:13	p:6.87148e-05	pcorr:6.87148e-05	-	Choren_v00_mik.OX359197.1G452.1	TRINITY_DN2447_c0_g1_i1
1894328	M:0	F:13	p:6.87148e-05	pcorr:6.87148e-05	-	Choren_v00_mik.OX359197.1G452.1	TRINITY_DN2447_c0_g1_i5
1894328	M:0	F:13	p:6.87148e-05	pcorr:6.87148e-05	-	Choren_v00_mik.OX359197.1G452.1	TRINITY_DN2447_c0_g1_i8
1894328	M:0	F:13	p:6.87148e-05	pcorr:6.87148e-05	-	Choren_v00_mik.OX359197.1G452.1	TRINITY_DN2447_c0_g1_i20
1901093	M:6	F:3	p:0.0267948	pcorr:0.0267948	-	Choren_v00_mik.OX359192.1G235.1	TRINITY_DN61302_c0_g1_i5
1901093	M:6	F:3	p:0.0267948	pcorr:0.0267948	-	Choren_v00_mik.OX359192.1G235.1	TRINITY_DN61302_c0_g1_i3
1901093	M:6	F:3	p:0.0267948	pcorr:0.0267948	-	Choren_v00_mik.OX359192.1G235.1	TRINITY_DN96606_c0_g1_i6
1901093	M:6	F:3	p:0.0267948	pcorr:0.0267948	-	Choren_v00_mik.OX359192.1G235.1	TRINITY_DN96606_c0_g1_i5
1901093	M:6	F:3	p:0.0267948	pcorr:0.0267948	-	Choren_v00_mik.OX359192.1G235.1	TRINITY_DN96606_c0_g1_i10
1901645	M:0	F:13	p:6.87148e-05	pcorr:6.87148e-05	-	#N/A	TRINITY_DN2298_c0_g1_i1
1901645	M:0	F:13	p:6.87148e-05	pcorr:6.87148e-05	-	#N/A	TRINITY_DN2298_c0_g1_i11
1901645	M:0	F:13	p:6.87148e-05	pcorr:6.87148e-05	-	#N/A	TRINITY_DN2298_c0_g1_i5
1901645	M:0	F:13	p:6.87148e-05	pcorr:6.87148e-05	-	#N/A	TRINITY_DN2298_c0_g1_i14
1901645	M:0	F:13	p:6.87148e-05	pcorr:6.87148e-05	-	#N/A	TRINITY_DN2298_c0_g1_i9
1901740	M:5	F:2	p:0.0439132	pcorr:0.0439132	-	#N/A	TRINITY_DN784_c1_g1_i11
1901740	M:5	F:2	p:0.0439132	pcorr:0.0439132	-	#N/A	TRINITY_DN784_c1_g1_i5
1901740	M:5	F:2	p:0.0439132	pcorr:0.0439132	-	#N/A	TRINITY_DN784_c1_g1_i2
1901740	M:5	F:2	p:0.0439132	pcorr:0.0439132	-	#N/A	TRINITY_DN784_c1_g1_i4
1901740	M:5	F:2	p:0.0439132	pcorr:0.0439132	-	#N/A	TRINITY_DN784_c1_g1_i12
1902296	M:5	F:2	p:0.0439132	pcorr:0.0439132	-	#N/A	TRINITY_DN210659_c0_g1_i1
1902296	M:5	F:2	p:0.0439132	pcorr:0.0439132	-	#N/A	TRINITY_DN210659_c0_g1_i1
1902296	M:5	F:2	p:0.0439132	pcorr:0.0439132	CJ067_HUMANUncharacterized protein C10orf67, mitochondrial OS=Homo sapiens OX=9606 GN=C10orf67 PE=1 SV=3	#N/A	TRINITY_DN701_c0_g2_i4
1902296	M:5	F:2	p:0.0439132	pcorr:0.0439132	CJ067_HUMANUncharacterized protein C10orf67, mitochondrial OS=Homo sapiens OX=9606 GN=C10orf67 PE=1 SV=3	#N/A	TRINITY_DN701_c0_g2_i5
1902296	M:5	F:2	p:0.0439132	pcorr:0.0439132	CJ067_HUMANUncharacterized protein C10orf67, mitochondrial OS=Homo sapiens OX=9606 GN=C10orf67 PE=1 SV=3	#N/A	TRINITY_DN701_c0_g2_i10
1902296	M:5	F:2	p:0.0439132	pcorr:0.0439132	-	#N/A	TRINITY_DN701_c0_g2_i7
1907446	M:6	F:3	p:0.0267948	pcorr:0.0267948	MAP1D_ARATHMethionine aminopeptidase 1D, chloroplastic/mitochondrial OS=Arabidopsis thaliana OX=3702 GN=MAP1D PE=1 SV=1	Choren_v00_mik.OX359196.1G1150.1	TRINITY_DN220919_c0_g1_i1
1910740	M:5	F:1	p:0.0140786	pcorr:0.0140786	-	Choren_v00_mik.OX359190.1G519.1	TRINITY_DN2265_c1_g1_i3
1910740	M:5	F:1	p:0.0140786	pcorr:0.0140786	-	Choren_v00_mik.OX359190.1G519.1	TRINITY_DN79960_c0_g1_i2
1910740	M:5	F:1	p:0.0140786	pcorr:0.0140786	-	Choren_v00_mik.OX359190.1G519.1	TRINITY_DN79960_c0_g2_i1
1910740	M:5	F:1	p:0.0140786	pcorr:0.0140786	-	Choren_v00_mik.OX359190.1G519.1	TRINITY_DN2265_c1_g1_i1
1910740	M:5	F:1	p:0.0140786	pcorr:0.0140786	-	Choren_v00_mik.OX359190.1G519.1	TRINITY_DN2265_c1_g1_i2
1913636	M:7	F:5	p:0.0277373	pcorr:0.0277373	-	Choren_v00_mik.OX359199.1G311.1	TRINITY_DN168244_c0_g1_i1
1913636	M:7	F:5	p:0.0277373	pcorr:0.0277373	CENPE_MOUSECentromere-associated protein E OS=Mus musculus OX=10090 GN=Cenpe PE=1 SV=1	Choren_v00_mik.OX359199.1G311.1	TRINITY_DN77604_c0_g1_i1
1913636	M:7	F:5	p:0.0277373	pcorr:0.0277373	CENPE_HUMANCentromere-associated protein E OS=Homo sapiens OX=9606 GN=CENPE PE=1 SV=2	Choren_v00_mik.OX359199.1G311.1	TRINITY_DN3658_c0_g1_i6
1913636	M:7	F:5	p:0.0277373	pcorr:0.0277373	CENPE_HUMANCentromere-associated protein E OS=Homo sapiens OX=9606 GN=CENPE PE=1 SV=2	Choren_v00_mik.OX359199.1G311.1	TRINITY_DN3658_c0_g1_i12
1913636	M:7	F:5	p:0.0277373	pcorr:0.0277373	CENPE_HUMANCentromere-associated protein E OS=Homo sapiens OX=9606 GN=CENPE PE=1 SV=2	Choren_v00_mik.OX359199.1G311.1	TRINITY_DN3658_c0_g1_i10
1914158	M:6	F:3	p:0.0267948	pcorr:0.0267948	PIWL1_DANREPiwi-like protein 1 OS=Danio rerio OX=7955 GN=piwil1 PE=1 SV=1	#N/A	TRINITY_DN1482_c0_g1_i10
1914158	M:6	F:3	p:0.0267948	pcorr:0.0267948	PIWL1_DANREPiwi-like protein 1 OS=Danio rerio OX=7955 GN=piwil1 PE=1 SV=1	#N/A	TRINITY_DN1482_c0_g1_i25
1914158	M:6	F:3	p:0.0267948	pcorr:0.0267948	PIWL1_DANREPiwi-like protein 1 OS=Danio rerio OX=7955 GN=piwil1 PE=1 SV=1	#N/A	TRINITY_DN1482_c0_g1_i4
1914158	M:6	F:3	p:0.0267948	pcorr:0.0267948	PIWL1_DANREPiwi-like protein 1 OS=Danio rerio OX=7955 GN=piwil1 PE=1 SV=1	#N/A	TRINITY_DN1482_c0_g1_i15
1914158	M:6	F:3	p:0.0267948	pcorr:0.0267948	PIWL1_DANREPiwi-like protein 1 OS=Danio rerio OX=7955 GN=piwil1 PE=1 SV=1	#N/A	TRINITY_DN1482_c0_g1_i2
1915415	M:5	F:2	p:0.0439132	pcorr:0.0439132	COX1_METSECytochrome c oxidase subunit 1 OS=Metridium senile OX=6116 GN=COI PE=3 SV=1	#N/A	TRINITY_DN1768_c0_g1_i1
1915415	M:5	F:2	p:0.0439132	pcorr:0.0439132	COX1_METSECytochrome c oxidase subunit 1 OS=Metridium senile OX=6116 GN=COI PE=3 SV=1	#N/A	TRINITY_DN1768_c0_g1_i2
1915415	M:5	F:2	p:0.0439132	pcorr:0.0439132	-	#N/A	TRINITY_DN129542_c0_g1_i1
1917162	M:5	F:1	p:0.0140786	pcorr:0.0140786	-	#N/A	TRINITY_DN9707_c0_g1_i4
1917162	M:5	F:1	p:0.0140786	pcorr:0.0140786	-	#N/A	TRINITY_DN5639_c0_g1_i8
1917162	M:5	F:1	p:0.0140786	pcorr:0.0140786	-	#N/A	TRINITY_DN5639_c0_g1_i1
1917162	M:5	F:1	p:0.0140786	pcorr:0.0140786	-	#N/A	TRINITY_DN5639_c0_g1_i6
1917162	M:5	F:1	p:0.0140786	pcorr:0.0140786	-	#N/A	TRINITY_DN5639_c0_g1_i3
1925521	M:2	F:13	p:0.00290775	pcorr:0.00290775	-	Choren_v00_mik.OX359192.1G235.1	TRINITY_DN2928_c2_g1_i1
1925521	M:2	F:13	p:0.00290775	pcorr:0.00290775	-	Choren_v00_mik.OX359192.1G235.1	TRINITY_DN2928_c2_g1_i3
1925521	M:2	F:13	p:0.00290775	pcorr:0.00290775	-	Choren_v00_mik.OX359192.1G235.1	TRINITY_DN2928_c2_g1_i2
1925521	M:2	F:13	p:0.00290775	pcorr:0.00290775	-	Choren_v00_mik.OX359192.1G235.1	TRINITY_DN79240_c1_g1_i2
1925521	M:2	F:13	p:0.00290775	pcorr:0.00290775	SLX1_MOUSEStructure-specific endonuclease subunit SLX1 OS=Mus musculus OX=10090 GN=Slx1b PE=2 SV=1	Choren_v00_mik.OX359192.1G235.1	TRINITY_DN29139_c0_g1_i2
1925673	M:0	F:10	p:0.00491056	pcorr:0.00491056	-	Choren_v00_mik.OX359199.1G358.1	TRINITY_DN71313_c0_g1_i4
1925673	M:0	F:10	p:0.00491056	pcorr:0.00491056	-	Choren_v00_mik.OX359199.1G358.1	TRINITY_DN2708_c1_g1_i3
1925673	M:0	F:10	p:0.00491056	pcorr:0.00491056	-	Choren_v00_mik.OX359199.1G358.1	TRINITY_DN65982_c0_g1_i2
1925673	M:0	F:10	p:0.00491056	pcorr:0.00491056	-	Choren_v00_mik.OX359199.1G358.1	TRINITY_DN71313_c0_g1_i3
1925673	M:0	F:10	p:0.00491056	pcorr:0.00491056	-	Choren_v00_mik.OX359199.1G358.1	TRINITY_DN71313_c0_g1_i7
1926436	M:2	F:11	p:0.0439132	pcorr:0.0439132	-	#N/A	TRINITY_DN95376_c0_g2_i1
1926436	M:2	F:11	p:0.0439132	pcorr:0.0439132	-	#N/A	TRINITY_DN11022_c0_g1_i5
1926436	M:2	F:11	p:0.0439132	pcorr:0.0439132	-	#N/A	TRINITY_DN11022_c0_g1_i3
1926436	M:2	F:11	p:0.0439132	pcorr:0.0439132	SHAN2_HUMANSH3 and multiple ankyrin repeat domains protein 2 OS=Homo sapiens OX=9606 GN=SHANK2 PE=1 SV=4	#N/A	TRINITY_DN11022_c0_g1_i2
1926436	M:2	F:11	p:0.0439132	pcorr:0.0439132	-	#N/A	TRINITY_DN42933_c0_g1_i1
1927110	M:5	F:2	p:0.0439132	pcorr:0.0439132	-	#N/A	TRINITY_DN561_c0_g1_i11
1927110	M:5	F:2	p:0.0439132	pcorr:0.0439132	-	#N/A	TRINITY_DN561_c0_g1_i15
1927110	M:5	F:2	p:0.0439132	pcorr:0.0439132	-	#N/A	TRINITY_DN561_c0_g1_i4
1927110	M:5	F:2	p:0.0439132	pcorr:0.0439132	-	#N/A	TRINITY_DN561_c0_g1_i8
1927110	M:5	F:2	p:0.0439132	pcorr:0.0439132	-	#N/A	TRINITY_DN58623_c1_g2_i1
1927133	M:6	F:0	p:0.000504657	pcorr:0.000504657	-	#N/A	TRINITY_DN79953_c0_g5_i2
1927133	M:6	F:0	p:0.000504657	pcorr:0.000504657	-	#N/A	TRINITY_DN79953_c0_g3_i1
1927133	M:6	F:0	p:0.000504657	pcorr:0.000504657	-	#N/A	TRINITY_DN79953_c0_g3_i2
1927628	M:1	F:10	p:0.0267948	pcorr:0.0267948	-	Choren_v00_mik.OX359191.1G185.1	TRINITY_DN3313_c0_g1_i8
1927628	M:1	F:10	p:0.0267948	pcorr:0.0267948	-	Choren_v00_mik.OX359191.1G185.1	TRINITY_DN3313_c0_g1_i14
1927628	M:1	F:10	p:0.0267948	pcorr:0.0267948	-	Choren_v00_mik.OX359191.1G185.1	TRINITY_DN3313_c0_g1_i4
1927628	M:1	F:10	p:0.0267948	pcorr:0.0267948	-	Choren_v00_mik.OX359191.1G185.1	TRINITY_DN3313_c0_g1_i3
1927628	M:1	F:10	p:0.0267948	pcorr:0.0267948	-	Choren_v00_mik.OX359191.1G185.1	TRINITY_DN3313_c0_g1_i17
1927776	M:0	F:10	p:0.00491056	pcorr:0.00491056	-	#N/A	TRINITY_DN80941_c0_g1_i1
1927776	M:0	F:10	p:0.00491056	pcorr:0.00491056	-	#N/A	TRINITY_DN80941_c0_g2_i1
1927776	M:0	F:10	p:0.00491056	pcorr:0.00491056	-	#N/A	TRINITY_DN151132_c1_g1_i1
1927776	M:0	F:10	p:0.00491056	pcorr:0.00491056	CF206_HUMANCilia- and flagella-associated protein 206 OS=Homo sapiens OX=9606 GN=CFAP206 PE=1 SV=2	#N/A	TRINITY_DN9253_c0_g1_i10
1927776	M:0	F:10	p:0.00491056	pcorr:0.00491056	CF206_BOVINCilia- and flagella-associated protein 206 OS=Bos taurus OX=9913 GN=CFAP206 PE=2 SV=2	#N/A	TRINITY_DN9253_c0_g1_i11
1929472	M:5	F:2	p:0.0439132	pcorr:0.0439132	-	#N/A	TRINITY_DN65_c0_g1_i3
1929472	M:5	F:2	p:0.0439132	pcorr:0.0439132	-	#N/A	TRINITY_DN65_c0_g1_i4
1929472	M:5	F:2	p:0.0439132	pcorr:0.0439132	-	#N/A	TRINITY_DN65_c0_g1_i8
1929472	M:5	F:2	p:0.0439132	pcorr:0.0439132	-	#N/A	TRINITY_DN65_c0_g1_i7
1929472	M:5	F:2	p:0.0439132	pcorr:0.0439132	-	#N/A	TRINITY_DN26574_c0_g1_i4
1936459	M:0	F:13	p:6.87148e-05	pcorr:6.87148e-05	-	Choren_v00_mik.OX359192.1G537.1	TRINITY_DN168507_c0_g1_i1
1936459	M:0	F:13	p:6.87148e-05	pcorr:6.87148e-05	-	Choren_v00_mik.OX359192.1G537.1	TRINITY_DN9070_c0_g1_i11
1936459	M:0	F:13	p:6.87148e-05	pcorr:6.87148e-05	-	Choren_v00_mik.OX359192.1G537.1	TRINITY_DN9070_c0_g1_i6
1936459	M:0	F:13	p:6.87148e-05	pcorr:6.87148e-05	-	Choren_v00_mik.OX359192.1G537.1	TRINITY_DN168507_c0_g1_i2
1942049	M:4	F:0	p:0.0138458	pcorr:0.0138458	-	#N/A	TRINITY_DN5712_c0_g1_i4
1942049	M:4	F:0	p:0.0138458	pcorr:0.0138458	-	#N/A	TRINITY_DN5712_c0_g1_i5
1942049	M:4	F:0	p:0.0138458	pcorr:0.0138458	-	#N/A	TRINITY_DN5712_c0_g1_i1
1942049	M:4	F:0	p:0.0138458	pcorr:0.0138458	-	#N/A	TRINITY_DN5712_c0_g1_i1
1942049	M:4	F:0	p:0.0138458	pcorr:0.0138458	-	#N/A	TRINITY_DN195682_c0_g1_i1
1942049	M:4	F:0	p:0.0138458	pcorr:0.0138458	-	#N/A	TRINITY_DN195682_c0_g1_i3
1948363	M:5	F:1	p:0.0140786	pcorr:0.0140786	-	Choren_v00_mik.OX359194.1G428.1	TRINITY_DN180_c0_g1_i22
1948363	M:5	F:1	p:0.0140786	pcorr:0.0140786	-	Choren_v00_mik.OX359194.1G428.1	TRINITY_DN180_c0_g1_i10
1948363	M:5	F:1	p:0.0140786	pcorr:0.0140786	-	Choren_v00_mik.OX359194.1G428.1	TRINITY_DN180_c0_g1_i23
1948363	M:5	F:1	p:0.0140786	pcorr:0.0140786	-	Choren_v00_mik.OX359194.1G428.1	TRINITY_DN180_c0_g1_i19
1948363	M:5	F:1	p:0.0140786	pcorr:0.0140786	-	Choren_v00_mik.OX359194.1G428.1	TRINITY_DN180_c0_g1_i2
1949810	M:7	F:3	p:0.00491056	pcorr:0.00491056	-	#N/A	TRINITY_DN27193_c0_g1_i5
1949810	M:7	F:3	p:0.00491056	pcorr:0.00491056	-	#N/A	TRINITY_DN27193_c0_g1_i11
1949810	M:7	F:3	p:0.00491056	pcorr:0.00491056	MAUG_METEAMethylamine utilization protein MauG OS=Methylorubrum extorquens (strain ATCC 14718 / DSM 1338 / JCM 2805 / NCIMB 9133 / AM1) OX=272630 GN=mauG PE=3 SV=1	#N/A	TRINITY_DN27193_c0_g1_i2
1949810	M:7	F:3	p:0.00491056	pcorr:0.00491056	-	#N/A	TRINITY_DN27193_c0_g1_i3
1949810	M:7	F:3	p:0.00491056	pcorr:0.00491056	-	#N/A	TRINITY_DN27193_c0_g1_i9
1955256	M:0	F:13	p:6.87148e-05	pcorr:6.87148e-05	-	Choren_v00_mik.OX359192.1G235.1	TRINITY_DN2928_c2_g1_i1
1955256	M:0	F:13	p:6.87148e-05	pcorr:6.87148e-05	-	Choren_v00_mik.OX359192.1G235.1	TRINITY_DN2928_c2_g1_i3
1955256	M:0	F:13	p:6.87148e-05	pcorr:6.87148e-05	-	Choren_v00_mik.OX359192.1G235.1	TRINITY_DN2928_c2_g1_i2
1955256	M:0	F:13	p:6.87148e-05	pcorr:6.87148e-05	SLX1_MOUSEStructure-specific endonuclease subunit SLX1 OS=Mus musculus OX=10090 GN=Slx1b PE=2 SV=1	Choren_v00_mik.OX359192.1G235.1	TRINITY_DN29139_c0_g1_i2
1955256	M:0	F:13	p:6.87148e-05	pcorr:6.87148e-05	SLX1_XENLAStructure-specific endonuclease subunit slx1 OS=Xenopus laevis OX=8355 GN=slx1a PE=2 SV=1	Choren_v00_mik.OX359192.1G235.1	TRINITY_DN29139_c0_g1_i3
1957143	M:6	F:2	p:0.00977293	pcorr:0.00977293	-	#N/A	TRINITY_DN175104_c0_g1_i2
1958039	M:5	F:1	p:0.0140786	pcorr:0.0140786	-	Choren_v00_mik.OX359189.1G1494.1	TRINITY_DN6013_c0_g1_i15
1958039	M:5	F:1	p:0.0140786	pcorr:0.0140786	-	Choren_v00_mik.OX359189.1G1494.1	TRINITY_DN65825_c0_g1_i1
1958039	M:5	F:1	p:0.0140786	pcorr:0.0140786	-	Choren_v00_mik.OX359189.1G1494.1	TRINITY_DN65825_c0_g1_i2
1958039	M:5	F:1	p:0.0140786	pcorr:0.0140786	-	Choren_v00_mik.OX359189.1G1494.1	TRINITY_DN6013_c0_g1_i19
1958039	M:5	F:1	p:0.0140786	pcorr:0.0140786	-	Choren_v00_mik.OX359189.1G1494.1	TRINITY_DN31868_c0_g1_i2
1958580	M:7	F:3	p:0.00491056	pcorr:0.00491056	ORC4_XENLAOrigin recognition complex subunit 4 OS=Xenopus laevis OX=8355 GN=orc4 PE=2 SV=1	Choren_v00_mik.OX359190.1G178.1	TRINITY_DN124_c0_g1_i16
1958580	M:7	F:3	p:0.00491056	pcorr:0.00491056	ORC4_XENLAOrigin recognition complex subunit 4 OS=Xenopus laevis OX=8355 GN=orc4 PE=2 SV=1	Choren_v00_mik.OX359190.1G178.1	TRINITY_DN124_c0_g1_i16
1958580	M:7	F:3	p:0.00491056	pcorr:0.00491056	ORC4_XENLAOrigin recognition complex subunit 4 OS=Xenopus laevis OX=8355 GN=orc4 PE=2 SV=1	Choren_v00_mik.OX359190.1G178.1	TRINITY_DN124_c0_g1_i2
1958580	M:7	F:3	p:0.00491056	pcorr:0.00491056	ORC4_XENLAOrigin recognition complex subunit 4 OS=Xenopus laevis OX=8355 GN=orc4 PE=2 SV=1	Choren_v00_mik.OX359190.1G178.1	TRINITY_DN124_c0_g1_i2
1958580	M:7	F:3	p:0.00491056	pcorr:0.00491056	ORC4_XENLAOrigin recognition complex subunit 4 OS=Xenopus laevis OX=8355 GN=orc4 PE=2 SV=1	Choren_v00_mik.OX359190.1G178.1	TRINITY_DN124_c0_g1_i19
1958580	M:7	F:3	p:0.00491056	pcorr:0.00491056	ORC4_XENLAOrigin recognition complex subunit 4 OS=Xenopus laevis OX=8355 GN=orc4 PE=2 SV=1	Choren_v00_mik.OX359190.1G178.1	TRINITY_DN124_c0_g1_i19
1958580	M:7	F:3	p:0.00491056	pcorr:0.00491056	ORC4_XENLAOrigin recognition complex subunit 4 OS=Xenopus laevis OX=8355 GN=orc4 PE=2 SV=1	Choren_v00_mik.OX359190.1G178.1	TRINITY_DN124_c0_g1_i21
1958580	M:7	F:3	p:0.00491056	pcorr:0.00491056	ORC4_XENLAOrigin recognition complex subunit 4 OS=Xenopus laevis OX=8355 GN=orc4 PE=2 SV=1	Choren_v00_mik.OX359190.1G178.1	TRINITY_DN124_c0_g1_i21
1958580	M:7	F:3	p:0.00491056	pcorr:0.00491056	ORC4_XENLAOrigin recognition complex subunit 4 OS=Xenopus laevis OX=8355 GN=orc4 PE=2 SV=1	Choren_v00_mik.OX359190.1G178.1	TRINITY_DN124_c0_g1_i25
1958580	M:7	F:3	p:0.00491056	pcorr:0.00491056	ORC4_XENLAOrigin recognition complex subunit 4 OS=Xenopus laevis OX=8355 GN=orc4 PE=2 SV=1	Choren_v00_mik.OX359190.1G178.1	TRINITY_DN124_c0_g1_i25
1966290	M:5	F:1	p:0.0140786	pcorr:0.0140786	-	#N/A	TRINITY_DN256170_c0_g1_i1
1968610	M:2	F:11	p:0.0439132	pcorr:0.0439132	-	Choren_v00_mik.OX359194.1G410.1	TRINITY_DN1829_c2_g1_i6
1968610	M:2	F:11	p:0.0439132	pcorr:0.0439132	-	Choren_v00_mik.OX359194.1G410.1	TRINITY_DN1829_c2_g1_i15
1968610	M:2	F:11	p:0.0439132	pcorr:0.0439132	-	Choren_v00_mik.OX359194.1G410.1	TRINITY_DN1829_c2_g1_i5
1968610	M:2	F:11	p:0.0439132	pcorr:0.0439132	-	Choren_v00_mik.OX359194.1G410.1	TRINITY_DN1829_c2_g1_i23
1968610	M:2	F:11	p:0.0439132	pcorr:0.0439132	-	Choren_v00_mik.OX359194.1G410.1	TRINITY_DN1829_c2_g1_i21
1969146	M:2	F:12	p:0.0140786	pcorr:0.0140786	-	#N/A	TRINITY_DN6875_c0_g1_i11
1969146	M:2	F:12	p:0.0140786	pcorr:0.0140786	-	#N/A	TRINITY_DN6875_c0_g1_i10
1969146	M:2	F:12	p:0.0140786	pcorr:0.0140786	-	#N/A	TRINITY_DN6875_c0_g1_i4
1971585	M:7	F:4	p:0.012518	pcorr:0.012518	CMTR1_XENLACap-specific mRNA (nucleoside-2'-O-)-methyltransferase 1 OS=Xenopus laevis OX=8355 GN=cmtr1 PE=2 SV=1	Choren_v00_mik.OX359189.1G1155.1	TRINITY_DN5394_c0_g1_i17
1971585	M:7	F:4	p:0.012518	pcorr:0.012518	CMTR1_XENLACap-specific mRNA (nucleoside-2'-O-)-methyltransferase 1 OS=Xenopus laevis OX=8355 GN=cmtr1 PE=2 SV=1	Choren_v00_mik.OX359189.1G1155.1	TRINITY_DN5394_c0_g1_i13
1971585	M:7	F:4	p:0.012518	pcorr:0.012518	CMTR1_XENLACap-specific mRNA (nucleoside-2'-O-)-methyltransferase 1 OS=Xenopus laevis OX=8355 GN=cmtr1 PE=2 SV=1	Choren_v00_mik.OX359189.1G1155.1	TRINITY_DN5394_c0_g1_i15
1971585	M:7	F:4	p:0.012518	pcorr:0.012518	CMTR1_XENLACap-specific mRNA (nucleoside-2'-O-)-methyltransferase 1 OS=Xenopus laevis OX=8355 GN=cmtr1 PE=2 SV=1	Choren_v00_mik.OX359189.1G1155.1	TRINITY_DN5394_c0_g1_i10
1971585	M:7	F:4	p:0.012518	pcorr:0.012518	CMTR1_XENLACap-specific mRNA (nucleoside-2'-O-)-methyltransferase 1 OS=Xenopus laevis OX=8355 GN=cmtr1 PE=2 SV=1	Choren_v00_mik.OX359189.1G1155.1	TRINITY_DN5394_c0_g1_i5
1971594	M:5	F:1	p:0.0140786	pcorr:0.0140786	-	#N/A	TRINITY_DN127673_c0_g2_i1
1971594	M:5	F:1	p:0.0140786	pcorr:0.0140786	-	#N/A	TRINITY_DN50351_c0_g1_i1
1971594	M:5	F:1	p:0.0140786	pcorr:0.0140786	PEAM2_ARATHPhosphomethylethanolamine N-methyltransferase OS=Arabidopsis thaliana OX=3702 GN=NMT2 PE=1 SV=2	#N/A	TRINITY_DN10665_c0_g1_i10
1971594	M:5	F:1	p:0.0140786	pcorr:0.0140786	PEAM2_ARATHPhosphomethylethanolamine N-methyltransferase OS=Arabidopsis thaliana OX=3702 GN=NMT2 PE=1 SV=2	#N/A	TRINITY_DN10665_c0_g1_i11
1971594	M:5	F:1	p:0.0140786	pcorr:0.0140786	NLRC4_XENTRNLR family CARD domain-containing protein 4 OS=Xenopus tropicalis OX=8364 GN=nlrc4 PE=2 SV=2	#N/A	TRINITY_DN4930_c0_g2_i9
1972490	M:1	F:10	p:0.0267948	pcorr:0.0267948	-	#N/A	TRINITY_DN22692_c0_g1_i2
1972490	M:1	F:10	p:0.0267948	pcorr:0.0267948	-	#N/A	TRINITY_DN22692_c0_g1_i4
1972490	M:1	F:10	p:0.0267948	pcorr:0.0267948	-	#N/A	TRINITY_DN3811_c0_g2_i5
1972490	M:1	F:10	p:0.0267948	pcorr:0.0267948	-	#N/A	TRINITY_DN3811_c0_g2_i9
1972490	M:1	F:10	p:0.0267948	pcorr:0.0267948	-	#N/A	TRINITY_DN3811_c0_g2_i11
1972525	M:1	F:10	p:0.0267948	pcorr:0.0267948	-	#N/A	TRINITY_DN79239_c0_g1_i4
1972525	M:1	F:10	p:0.0267948	pcorr:0.0267948	-	#N/A	TRINITY_DN17344_c5_g1_i1
1972525	M:1	F:10	p:0.0267948	pcorr:0.0267948	-	#N/A	TRINITY_DN87246_c0_g1_i2
1972525	M:1	F:10	p:0.0267948	pcorr:0.0267948	-	#N/A	TRINITY_DN87246_c0_g1_i1
1972525	M:1	F:10	p:0.0267948	pcorr:0.0267948	-	#N/A	TRINITY_DN6733_c0_g1_i2
1976996	M:6	F:2	p:0.00977293	pcorr:0.00977293	COX1_METSECytochrome c oxidase subunit 1 OS=Metridium senile OX=6116 GN=COI PE=3 SV=1	#N/A	TRINITY_DN1768_c0_g1_i1
1976996	M:6	F:2	p:0.00977293	pcorr:0.00977293	COX1_METSECytochrome c oxidase subunit 1 OS=Metridium senile OX=6116 GN=COI PE=3 SV=1	#N/A	TRINITY_DN1768_c0_g1_i2
1977772	M:2	F:11	p:0.0439132	pcorr:0.0439132	FCNV1_CERRYRyncolin-1 OS=Cerberus rynchops OX=46267 PE=1 SV=1	Choren_v00_mik.OX359192.1G235.1	TRINITY_DN4858_c0_g1_i8
1977772	M:2	F:11	p:0.0439132	pcorr:0.0439132	FCNV1_CERRYRyncolin-1 OS=Cerberus rynchops OX=46267 PE=1 SV=1	Choren_v00_mik.OX359192.1G235.1	TRINITY_DN4858_c0_g1_i4
1977772	M:2	F:11	p:0.0439132	pcorr:0.0439132	FCNV1_CERRYRyncolin-1 OS=Cerberus rynchops OX=46267 PE=1 SV=1	Choren_v00_mik.OX359192.1G235.1	TRINITY_DN4858_c0_g1_i10
1977772	M:2	F:11	p:0.0439132	pcorr:0.0439132	-	Choren_v00_mik.OX359192.1G235.1	TRINITY_DN5712_c0_g1_i1
1977772	M:2	F:11	p:0.0439132	pcorr:0.0439132	-	Choren_v00_mik.OX359192.1G235.1	TRINITY_DN5364_c0_g1_i14
1978379	M:1	F:10	p:0.0267948	pcorr:0.0267948	-	#N/A	TRINITY_DN12206_c1_g1_i1
1978379	M:1	F:10	p:0.0267948	pcorr:0.0267948	RL15_CYPCA60S ribosomal protein L15 OS=Cyprinus carpio OX=7962 GN=rpl15 PE=2 SV=3	#N/A	TRINITY_DN542_c0_g1_i14
1978379	M:1	F:10	p:0.0267948	pcorr:0.0267948	RL15_CYPCA60S ribosomal protein L15 OS=Cyprinus carpio OX=7962 GN=rpl15 PE=2 SV=3	#N/A	TRINITY_DN542_c0_g1_i10
1978379	M:1	F:10	p:0.0267948	pcorr:0.0267948	RL15_CYPCA60S ribosomal protein L15 OS=Cyprinus carpio OX=7962 GN=rpl15 PE=2 SV=3	#N/A	TRINITY_DN542_c0_g1_i20
1978379	M:1	F:10	p:0.0267948	pcorr:0.0267948	RL15_CYPCA60S ribosomal protein L15 OS=Cyprinus carpio OX=7962 GN=rpl15 PE=2 SV=3	#N/A	TRINITY_DN542_c0_g1_i9
1982920	M:4	F:0	p:0.0138458	pcorr:0.0138458	PTAS_THETCPhosphate acetyltransferase OS=Thermoanaerobacterium thermosaccharolyticum (strain ATCC 7956 / DSM 571 / NCIMB 9385 / NCA 3814 / NCTC 13789 / WDCM 00135 / 2032) OX=580327 GN=pta PE=3 SV=2	#N/A	TRINITY_DN35509_c0_g1_i2
1982920	M:4	F:0	p:0.0138458	pcorr:0.0138458	PTAS_THETCPhosphate acetyltransferase OS=Thermoanaerobacterium thermosaccharolyticum (strain ATCC 7956 / DSM 571 / NCIMB 9385 / NCA 3814 / NCTC 13789 / WDCM 00135 / 2032) OX=580327 GN=pta PE=3 SV=2	#N/A	TRINITY_DN35509_c0_g1_i12
1983826	M:4	F:0	p:0.0138458	pcorr:0.0138458	-	#N/A	TRINITY_DN6243_c1_g1_i4
1983826	M:4	F:0	p:0.0138458	pcorr:0.0138458	-	#N/A	TRINITY_DN6243_c1_g1_i3
1983826	M:4	F:0	p:0.0138458	pcorr:0.0138458	-	#N/A	TRINITY_DN6243_c1_g1_i6
1983826	M:4	F:0	p:0.0138458	pcorr:0.0138458	-	#N/A	TRINITY_DN6243_c1_g1_i7
1983826	M:4	F:0	p:0.0138458	pcorr:0.0138458	-	#N/A	TRINITY_DN6243_c1_g1_i1
1985650	M:4	F:0	p:0.0138458	pcorr:0.0138458	-	#N/A	TRINITY_DN40156_c0_g1_i12
1985650	M:4	F:0	p:0.0138458	pcorr:0.0138458	-	#N/A	TRINITY_DN40156_c0_g1_i8
1985650	M:4	F:0	p:0.0138458	pcorr:0.0138458	-	#N/A	TRINITY_DN6026_c0_g1_i5
1985650	M:4	F:0	p:0.0138458	pcorr:0.0138458	-	#N/A	TRINITY_DN6026_c0_g1_i1
1985650	M:4	F:0	p:0.0138458	pcorr:0.0138458	-	#N/A	TRINITY_DN2048_c0_g1_i10
1986351	M:0	F:8	p:0.0277373	pcorr:0.0277373	CIPKB_ORYSJCBL-interacting protein kinase 11 OS=Oryza sativa subsp. japonica OX=39947 GN=CIPK11 PE=2 SV=1	Choren_v00_mik.OX359194.1G836.1	TRINITY_DN2848_c0_g1_i17
1986351	M:0	F:8	p:0.0277373	pcorr:0.0277373	KDM4C_HUMANLysine-specific demethylase 4C OS=Homo sapiens OX=9606 GN=KDM4C PE=1 SV=2	Choren_v00_mik.OX359194.1G836.1	TRINITY_DN2848_c0_g1_i14
1986351	M:0	F:8	p:0.0277373	pcorr:0.0277373	KDM4A_PONABLysine-specific demethylase 4A OS=Pongo abelii OX=9601 GN=KDM4A PE=2 SV=1	Choren_v00_mik.OX359194.1G836.1	TRINITY_DN2848_c0_g1_i16
1986351	M:0	F:8	p:0.0277373	pcorr:0.0277373	KDM4C_HUMANLysine-specific demethylase 4C OS=Homo sapiens OX=9606 GN=KDM4C PE=1 SV=2	Choren_v00_mik.OX359194.1G836.1	TRINITY_DN2848_c0_g1_i1
1986351	M:0	F:8	p:0.0277373	pcorr:0.0277373	KDM4A_PONABLysine-specific demethylase 4A OS=Pongo abelii OX=9601 GN=KDM4A PE=2 SV=1	Choren_v00_mik.OX359194.1G836.1	TRINITY_DN2848_c0_g1_i2
1987109	M:1	F:11	p:0.00977293	pcorr:0.00977293	PPZD_METRR2-oxoglutarate-Fe(II) type oxidoreductase ppzD OS=Metarhizium rileyi (strain RCEF 4871) OX=1081105 GN=ppzD PE=3 SV=1	Choren_v00_mik.OX359198.1G905.1	TRINITY_DN239_c0_g1_i7
1987109	M:1	F:11	p:0.00977293	pcorr:0.00977293	PPZD_METRR2-oxoglutarate-Fe(II) type oxidoreductase ppzD OS=Metarhizium rileyi (strain RCEF 4871) OX=1081105 GN=ppzD PE=3 SV=1	Choren_v00_mik.OX359198.1G905.1	TRINITY_DN239_c0_g1_i20
1987109	M:1	F:11	p:0.00977293	pcorr:0.00977293	S35F5_BOVINSolute carrier family 35 member F5 OS=Bos taurus OX=9913 GN=SLC35F5 PE=2 SV=1	Choren_v00_mik.OX359198.1G905.1	TRINITY_DN239_c0_g1_i16
1987109	M:1	F:11	p:0.00977293	pcorr:0.00977293	S35F5_PONABSolute carrier family 35 member F5 OS=Pongo abelii OX=9601 GN=SLC35F5 PE=2 SV=1	Choren_v00_mik.OX359198.1G905.1	TRINITY_DN239_c0_g1_i4
1987109	M:1	F:11	p:0.00977293	pcorr:0.00977293	S35F5_PONABSolute carrier family 35 member F5 OS=Pongo abelii OX=9601 GN=SLC35F5 PE=2 SV=1	Choren_v00_mik.OX359198.1G905.1	TRINITY_DN239_c0_g1_i6
1988844	M:7	F:5	p:0.0277373	pcorr:0.0277373	-	Choren_v00_mik.OX359199.1G307.1	TRINITY_DN59868_c0_g1_i1
1988844	M:7	F:5	p:0.0277373	pcorr:0.0277373	CENPE_HUMANCentromere-associated protein E OS=Homo sapiens OX=9606 GN=CENPE PE=1 SV=2	Choren_v00_mik.OX359199.1G307.1	TRINITY_DN3658_c0_g1_i6
1988844	M:7	F:5	p:0.0277373	pcorr:0.0277373	CENPE_HUMANCentromere-associated protein E OS=Homo sapiens OX=9606 GN=CENPE PE=1 SV=2	Choren_v00_mik.OX359199.1G307.1	TRINITY_DN3658_c0_g1_i10
1988844	M:7	F:5	p:0.0277373	pcorr:0.0277373	CENPE_HUMANCentromere-associated protein E OS=Homo sapiens OX=9606 GN=CENPE PE=1 SV=2	Choren_v00_mik.OX359199.1G307.1	TRINITY_DN3658_c0_g1_i11
1988844	M:7	F:5	p:0.0277373	pcorr:0.0277373	CENPE_HUMANCentromere-associated protein E OS=Homo sapiens OX=9606 GN=CENPE PE=1 SV=2	Choren_v00_mik.OX359199.1G307.1	TRINITY_DN3658_c0_g1_i12
1994808	M:4	F:0	p:0.0138458	pcorr:0.0138458	-	Choren_v00_mik.OX359201.1G266.1	TRINITY_DN331_c1_g2_i1
1995394	M:5	F:2	p:0.0439132	pcorr:0.0439132	-	#N/A	TRINITY_DN42494_c0_g2_i4
1995394	M:5	F:2	p:0.0439132	pcorr:0.0439132	-	#N/A	TRINITY_DN42494_c0_g2_i3
1995394	M:5	F:2	p:0.0439132	pcorr:0.0439132	-	#N/A	TRINITY_DN42494_c0_g2_i5
2004544	M:0	F:13	p:6.87148e-05	pcorr:6.87148e-05	-	Choren_v00_mik.OX359191.1G405.1	TRINITY_DN10660_c0_g1_i11
2004544	M:0	F:13	p:6.87148e-05	pcorr:6.87148e-05	-	Choren_v00_mik.OX359191.1G405.1	TRINITY_DN10660_c0_g1_i9
2004544	M:0	F:13	p:6.87148e-05	pcorr:6.87148e-05	-	Choren_v00_mik.OX359191.1G405.1	TRINITY_DN10660_c0_g1_i2
2004544	M:0	F:13	p:6.87148e-05	pcorr:6.87148e-05	-	Choren_v00_mik.OX359191.1G405.1	TRINITY_DN10660_c0_g1_i6
2004544	M:0	F:13	p:6.87148e-05	pcorr:6.87148e-05	PO21_NASVIRetrovirus-related Pol polyprotein from type-1 retrotransposable element R2 (Fragment) OS=Nasonia vitripennis OX=7425 PE=4 SV=2	Choren_v00_mik.OX359191.1G405.1	TRINITY_DN1825_c1_g1_i12
2005560	M:5	F:2	p:0.0439132	pcorr:0.0439132	ESTD_RATS-formylglutathione hydrolase OS=Rattus norvegicus OX=10116 GN=Esd PE=2 SV=1	#N/A	TRINITY_DN3379_c0_g1_i8
2005560	M:5	F:2	p:0.0439132	pcorr:0.0439132	ESTD_RATS-formylglutathione hydrolase OS=Rattus norvegicus OX=10116 GN=Esd PE=2 SV=1	#N/A	TRINITY_DN3379_c0_g1_i25
2005560	M:5	F:2	p:0.0439132	pcorr:0.0439132	ESTD_RATS-formylglutathione hydrolase OS=Rattus norvegicus OX=10116 GN=Esd PE=2 SV=1	#N/A	TRINITY_DN3379_c0_g1_i20
2005560	M:5	F:2	p:0.0439132	pcorr:0.0439132	ESTD_RATS-formylglutathione hydrolase OS=Rattus norvegicus OX=10116 GN=Esd PE=2 SV=1	#N/A	TRINITY_DN3379_c0_g1_i18
2005560	M:5	F:2	p:0.0439132	pcorr:0.0439132	ESTD_RATS-formylglutathione hydrolase OS=Rattus norvegicus OX=10116 GN=Esd PE=2 SV=1	#N/A	TRINITY_DN3379_c0_g1_i23
2011670	M:7	F:2	p:0.00159493	pcorr:0.00159493	-	#N/A	TRINITY_DN41419_c0_g2_i1
2011670	M:7	F:2	p:0.00159493	pcorr:0.00159493	MGAT2_RATAlpha-1,6-mannosyl-glycoprotein 2-beta-N-acetylglucosaminyltransferase OS=Rattus norvegicus OX=10116 GN=Mgat2 PE=1 SV=1	#N/A	TRINITY_DN2770_c0_g1_i13
2011670	M:7	F:2	p:0.00159493	pcorr:0.00159493	-	#N/A	TRINITY_DN2770_c0_g1_i6
2011741	M:7	F:4	p:0.012518	pcorr:0.012518	WDR89_PONABWD repeat-containing protein 89 OS=Pongo abelii OX=9601 GN=WDR89 PE=2 SV=1	Choren_v00_mik.OX359200.1G313.1	TRINITY_DN4089_c0_g1_i30
2011741	M:7	F:4	p:0.012518	pcorr:0.012518	WDR89_RATWD repeat-containing protein 89 OS=Rattus norvegicus OX=10116 GN=Wdr89 PE=2 SV=1	Choren_v00_mik.OX359200.1G313.1	TRINITY_DN4089_c0_g1_i8
2011741	M:7	F:4	p:0.012518	pcorr:0.012518	WDR89_RATWD repeat-containing protein 89 OS=Rattus norvegicus OX=10116 GN=Wdr89 PE=2 SV=1	Choren_v00_mik.OX359200.1G313.1	TRINITY_DN4089_c0_g1_i9
2011741	M:7	F:4	p:0.012518	pcorr:0.012518	WDR89_RATWD repeat-containing protein 89 OS=Rattus norvegicus OX=10116 GN=Wdr89 PE=2 SV=1	Choren_v00_mik.OX359200.1G313.1	TRINITY_DN4089_c0_g1_i4
2011741	M:7	F:4	p:0.012518	pcorr:0.012518	-	Choren_v00_mik.OX359200.1G313.1	TRINITY_DN15996_c0_g1_i1
2012631	M:5	F:2	p:0.0439132	pcorr:0.0439132	TCAIM_RATT-cell activation inhibitor, mitochondrial OS=Rattus norvegicus OX=10116 GN=Tcaim PE=2 SV=1	Choren_v00_mik.OX359200.1G358.1	TRINITY_DN597_c0_g1_i3
2012631	M:5	F:2	p:0.0439132	pcorr:0.0439132	TCAIM_RATT-cell activation inhibitor, mitochondrial OS=Rattus norvegicus OX=10116 GN=Tcaim PE=2 SV=1	Choren_v00_mik.OX359200.1G358.1	TRINITY_DN597_c0_g1_i4
2012631	M:5	F:2	p:0.0439132	pcorr:0.0439132	TCAIM_RATT-cell activation inhibitor, mitochondrial OS=Rattus norvegicus OX=10116 GN=Tcaim PE=2 SV=1	Choren_v00_mik.OX359200.1G358.1	TRINITY_DN597_c0_g1_i2
2013818	M:0	F:9	p:0.012518	pcorr:0.012518	PR38A_DANREPre-mRNA-splicing factor 38A OS=Danio rerio OX=7955 GN=prpf38a PE=2 SV=1	Choren_v00_mik.OX359194.1G562.2	TRINITY_DN2932_c0_g1_i5
2013818	M:0	F:9	p:0.012518	pcorr:0.012518	PR38A_DANREPre-mRNA-splicing factor 38A OS=Danio rerio OX=7955 GN=prpf38a PE=2 SV=1	Choren_v00_mik.OX359194.1G562.2	TRINITY_DN2932_c0_g1_i13
2013818	M:0	F:9	p:0.012518	pcorr:0.012518	-	Choren_v00_mik.OX359194.1G562.2	TRINITY_DN2932_c0_g1_i9
2013818	M:0	F:9	p:0.012518	pcorr:0.012518	PR38A_DANREPre-mRNA-splicing factor 38A OS=Danio rerio OX=7955 GN=prpf38a PE=2 SV=1	Choren_v00_mik.OX359194.1G562.2	TRINITY_DN2932_c0_g1_i10
2013818	M:0	F:9	p:0.012518	pcorr:0.012518	PR38A_BOVINPre-mRNA-splicing factor 38A OS=Bos taurus OX=9913 GN=PRPF38A PE=2 SV=1	Choren_v00_mik.OX359194.1G562.2	TRINITY_DN2932_c0_g1_i12
2013969	M:0	F:9	p:0.012518	pcorr:0.012518	PO21_NASVIRetrovirus-related Pol polyprotein from type-1 retrotransposable element R2 (Fragment) OS=Nasonia vitripennis OX=7425 PE=4 SV=2	Choren_v00_mik.OX359197.1G451.1	TRINITY_DN1825_c1_g1_i12
2013969	M:0	F:9	p:0.012518	pcorr:0.012518	PO21_NASVIRetrovirus-related Pol polyprotein from type-1 retrotransposable element R2 (Fragment) OS=Nasonia vitripennis OX=7425 PE=4 SV=2	Choren_v00_mik.OX359197.1G451.1	TRINITY_DN1825_c1_g1_i4
2013969	M:0	F:9	p:0.012518	pcorr:0.012518	PO21_NASVIRetrovirus-related Pol polyprotein from type-1 retrotransposable element R2 (Fragment) OS=Nasonia vitripennis OX=7425 PE=4 SV=2	Choren_v00_mik.OX359197.1G451.1	TRINITY_DN1825_c1_g1_i15
2013969	M:0	F:9	p:0.012518	pcorr:0.012518	PO21_NASVIRetrovirus-related Pol polyprotein from type-1 retrotransposable element R2 (Fragment) OS=Nasonia vitripennis OX=7425 PE=4 SV=2	Choren_v00_mik.OX359197.1G451.1	TRINITY_DN1825_c1_g1_i6
2013969	M:0	F:9	p:0.012518	pcorr:0.012518	-	Choren_v00_mik.OX359197.1G451.1	TRINITY_DN6727_c0_g1_i8
2017267	M:6	F:3	p:0.0267948	pcorr:0.0267948	-	Choren_v00_mik.OX359201.1G53.1	TRINITY_DN105742_c0_g2_i3
2017267	M:6	F:3	p:0.0267948	pcorr:0.0267948	-	Choren_v00_mik.OX359201.1G53.1	TRINITY_DN2794_c0_g1_i5
2017267	M:6	F:3	p:0.0267948	pcorr:0.0267948	-	Choren_v00_mik.OX359201.1G53.1	TRINITY_DN2794_c0_g1_i13
2017267	M:6	F:3	p:0.0267948	pcorr:0.0267948	-	Choren_v00_mik.OX359201.1G53.1	TRINITY_DN7309_c0_g1_i4
2017267	M:6	F:3	p:0.0267948	pcorr:0.0267948	-	Choren_v00_mik.OX359201.1G53.1	TRINITY_DN23913_c0_g1_i1
2019218	M:6	F:3	p:0.0267948	pcorr:0.0267948	PTPRA_HUMANReceptor-type tyrosine-protein phosphatase alpha OS=Homo sapiens OX=9606 GN=PTPRA PE=1 SV=3	Choren_v00_mik.OX359201.1G330.1	TRINITY_DN6803_c0_g1_i3
2019218	M:6	F:3	p:0.0267948	pcorr:0.0267948	PTPRS_HUMANReceptor-type tyrosine-protein phosphatase S OS=Homo sapiens OX=9606 GN=PTPRS PE=1 SV=3	Choren_v00_mik.OX359201.1G330.1	TRINITY_DN6803_c0_g1_i6
2019218	M:6	F:3	p:0.0267948	pcorr:0.0267948	-	Choren_v00_mik.OX359201.1G330.1	TRINITY_DN59589_c1_g1_i1
2019218	M:6	F:3	p:0.0267948	pcorr:0.0267948	-	Choren_v00_mik.OX359201.1G330.1	TRINITY_DN59589_c1_g1_i4
2019218	M:6	F:3	p:0.0267948	pcorr:0.0267948	-	Choren_v00_mik.OX359201.1G330.1	TRINITY_DN59589_c1_g1_i6
2020949	M:5	F:2	p:0.0439132	pcorr:0.0439132	YDH2_XANAUUncharacterized protein in dhlA 3'region (Fragment) OS=Xanthobacter autotrophicus OX=280 PE=4 SV=2	#N/A	TRINITY_DN69335_c0_g1_i1
2024408	M:0	F:8	p:0.0277373	pcorr:0.0277373	PO21_NASVIRetrovirus-related Pol polyprotein from type-1 retrotransposable element R2 (Fragment) OS=Nasonia vitripennis OX=7425 PE=4 SV=2	Choren_v00_mik.OX359194.1G274.1	TRINITY_DN1825_c1_g1_i12
2024408	M:0	F:8	p:0.0277373	pcorr:0.0277373	PO21_NASVIRetrovirus-related Pol polyprotein from type-1 retrotransposable element R2 (Fragment) OS=Nasonia vitripennis OX=7425 PE=4 SV=2	Choren_v00_mik.OX359194.1G274.1	TRINITY_DN1825_c1_g1_i4
2024408	M:0	F:8	p:0.0277373	pcorr:0.0277373	PO21_NASVIRetrovirus-related Pol polyprotein from type-1 retrotransposable element R2 (Fragment) OS=Nasonia vitripennis OX=7425 PE=4 SV=2	Choren_v00_mik.OX359194.1G274.1	TRINITY_DN1825_c1_g1_i15
2024408	M:0	F:8	p:0.0277373	pcorr:0.0277373	PO21_NASVIRetrovirus-related Pol polyprotein from type-1 retrotransposable element R2 (Fragment) OS=Nasonia vitripennis OX=7425 PE=4 SV=2	Choren_v00_mik.OX359194.1G274.1	TRINITY_DN1825_c1_g1_i6
2024408	M:0	F:8	p:0.0277373	pcorr:0.0277373	-	Choren_v00_mik.OX359194.1G274.1	TRINITY_DN43729_c0_g1_i3
2025575	M:5	F:2	p:0.0439132	pcorr:0.0439132	-	#N/A	TRINITY_DN89756_c0_g2_i4
2025575	M:5	F:2	p:0.0439132	pcorr:0.0439132	-	#N/A	TRINITY_DN89756_c0_g2_i2
2026259	M:7	F:4	p:0.012518	pcorr:0.012518	-	#N/A	TRINITY_DN43406_c0_g1_i6
2026752	M:6	F:3	p:0.0267948	pcorr:0.0267948	-	#N/A	TRINITY_DN16193_c1_g1_i4
2026752	M:6	F:3	p:0.0267948	pcorr:0.0267948	ATPI1_ACTTEActinia tenebrosa protease inhibitors OS=Actinia tenebrosa OX=6105 PE=1 SV=1	#N/A	TRINITY_DN94_c0_g1_i14
2026752	M:6	F:3	p:0.0267948	pcorr:0.0267948	ATPI1_ACTTEActinia tenebrosa protease inhibitors OS=Actinia tenebrosa OX=6105 PE=1 SV=1	#N/A	TRINITY_DN94_c0_g1_i13
2026752	M:6	F:3	p:0.0267948	pcorr:0.0267948	ATPI1_ACTTEActinia tenebrosa protease inhibitors OS=Actinia tenebrosa OX=6105 PE=1 SV=1	#N/A	TRINITY_DN94_c0_g1_i7
2026752	M:6	F:3	p:0.0267948	pcorr:0.0267948	ATPI1_ACTTEActinia tenebrosa protease inhibitors OS=Actinia tenebrosa OX=6105 PE=1 SV=1	#N/A	TRINITY_DN94_c0_g1_i21
2027298	M:0	F:13	p:6.87148e-05	pcorr:6.87148e-05	-	#N/A	TRINITY_DN106731_c0_g1_i1
2027298	M:0	F:13	p:6.87148e-05	pcorr:6.87148e-05	-	#N/A	TRINITY_DN106731_c0_g1_i2
2027298	M:0	F:13	p:6.87148e-05	pcorr:6.87148e-05	-	#N/A	TRINITY_DN29397_c0_g1_i8
2027298	M:0	F:13	p:6.87148e-05	pcorr:6.87148e-05	-	#N/A	TRINITY_DN23274_c0_g1_i1
2027298	M:0	F:13	p:6.87148e-05	pcorr:6.87148e-05	-	#N/A	TRINITY_DN53548_c0_g1_i1
2028200	M:7	F:5	p:0.0277373	pcorr:0.0277373	CYFP2_XENLACytoplasmic FMR1-interacting protein 2 OS=Xenopus laevis OX=8355 GN=cyfip2 PE=2 SV=1	#N/A	TRINITY_DN459_c0_g1_i12
2028200	M:7	F:5	p:0.0277373	pcorr:0.0277373	CYFP2_XENLACytoplasmic FMR1-interacting protein 2 OS=Xenopus laevis OX=8355 GN=cyfip2 PE=2 SV=1	#N/A	TRINITY_DN459_c0_g1_i21
2028200	M:7	F:5	p:0.0277373	pcorr:0.0277373	CYFP1_HUMANCytoplasmic FMR1-interacting protein 1 OS=Homo sapiens OX=9606 GN=CYFIP1 PE=1 SV=1	#N/A	TRINITY_DN459_c0_g1_i17
2028200	M:7	F:5	p:0.0277373	pcorr:0.0277373	CYFP1_HUMANCytoplasmic FMR1-interacting protein 1 OS=Homo sapiens OX=9606 GN=CYFIP1 PE=1 SV=1	#N/A	TRINITY_DN459_c0_g1_i1
2028200	M:7	F:5	p:0.0277373	pcorr:0.0277373	CYFP2_XENLACytoplasmic FMR1-interacting protein 2 OS=Xenopus laevis OX=8355 GN=cyfip2 PE=2 SV=1	#N/A	TRINITY_DN459_c0_g1_i7
2034435	M:0	F:9	p:0.012518	pcorr:0.012518	-	Choren_v00_mik.OX359190.1G304.1	TRINITY_DN47962_c0_g1_i4
2034435	M:0	F:9	p:0.012518	pcorr:0.012518	-	Choren_v00_mik.OX359190.1G304.1	TRINITY_DN14669_c0_g1_i2
2034435	M:0	F:9	p:0.012518	pcorr:0.012518	-	Choren_v00_mik.OX359190.1G304.1	TRINITY_DN14669_c0_g1_i4
2034435	M:0	F:9	p:0.012518	pcorr:0.012518	-	Choren_v00_mik.OX359190.1G304.1	TRINITY_DN14669_c0_g1_i5
2034435	M:0	F:9	p:0.012518	pcorr:0.012518	-	Choren_v00_mik.OX359190.1G304.1	TRINITY_DN104828_c0_g1_i1
2034868	M:6	F:2	p:0.00977293	pcorr:0.00977293	PRDX1_GEKJAPeroxiredoxin-1 OS=Gekko japonicus OX=146911 GN=PRDX1 PE=2 SV=1	#N/A	TRINITY_DN356_c0_g1_i5
2034868	M:6	F:2	p:0.00977293	pcorr:0.00977293	CBPC6_MOUSECytosolic carboxypeptidase 6 OS=Mus musculus OX=10090 GN=Agbl4 PE=1 SV=1	#N/A	TRINITY_DN356_c0_g1_i7
2034868	M:6	F:2	p:0.00977293	pcorr:0.00977293	CBPC6_MOUSECytosolic carboxypeptidase 6 OS=Mus musculus OX=10090 GN=Agbl4 PE=1 SV=1	#N/A	TRINITY_DN356_c0_g1_i6
2034868	M:6	F:2	p:0.00977293	pcorr:0.00977293	PRDX1_GEKJAPeroxiredoxin-1 OS=Gekko japonicus OX=146911 GN=PRDX1 PE=2 SV=1	#N/A	TRINITY_DN356_c0_g1_i8
2034868	M:6	F:2	p:0.00977293	pcorr:0.00977293	CBPC6_MOUSECytosolic carboxypeptidase 6 OS=Mus musculus OX=10090 GN=Agbl4 PE=1 SV=1	#N/A	TRINITY_DN356_c0_g1_i9
2035441	M:0	F:13	p:6.87148e-05	pcorr:6.87148e-05	PO21_NASVIRetrovirus-related Pol polyprotein from type-1 retrotransposable element R2 (Fragment) OS=Nasonia vitripennis OX=7425 PE=4 SV=2	Choren_v00_mik.OX359197.1G451.1	TRINITY_DN1825_c1_g1_i12
2035441	M:0	F:13	p:6.87148e-05	pcorr:6.87148e-05	PO21_NASVIRetrovirus-related Pol polyprotein from type-1 retrotransposable element R2 (Fragment) OS=Nasonia vitripennis OX=7425 PE=4 SV=2	Choren_v00_mik.OX359197.1G451.1	TRINITY_DN1825_c1_g1_i4
2035441	M:0	F:13	p:6.87148e-05	pcorr:6.87148e-05	PO21_NASVIRetrovirus-related Pol polyprotein from type-1 retrotransposable element R2 (Fragment) OS=Nasonia vitripennis OX=7425 PE=4 SV=2	Choren_v00_mik.OX359197.1G451.1	TRINITY_DN1825_c1_g1_i15
2035441	M:0	F:13	p:6.87148e-05	pcorr:6.87148e-05	PO21_NASVIRetrovirus-related Pol polyprotein from type-1 retrotransposable element R2 (Fragment) OS=Nasonia vitripennis OX=7425 PE=4 SV=2	Choren_v00_mik.OX359197.1G451.1	TRINITY_DN1825_c1_g1_i6
2035441	M:0	F:13	p:6.87148e-05	pcorr:6.87148e-05	-	Choren_v00_mik.OX359197.1G451.1	TRINITY_DN6727_c0_g1_i8
2036150	M:0	F:12	p:0.000399051	pcorr:0.000399051	POL4_DROMERetrovirus-related Pol polyprotein from transposon 412 OS=Drosophila melanogaster OX=7227 GN=POL PE=4 SV=1	Choren_v00_mik.OX359200.1G623.1	TRINITY_DN5152_c0_g2_i5
2036150	M:0	F:12	p:0.000399051	pcorr:0.000399051	POL4_DROMERetrovirus-related Pol polyprotein from transposon 412 OS=Drosophila melanogaster OX=7227 GN=POL PE=4 SV=1	Choren_v00_mik.OX359200.1G623.1	TRINITY_DN5152_c0_g2_i3
2036150	M:0	F:12	p:0.000399051	pcorr:0.000399051	POL4_DROMERetrovirus-related Pol polyprotein from transposon 412 OS=Drosophila melanogaster OX=7227 GN=POL PE=4 SV=1	Choren_v00_mik.OX359200.1G623.1	TRINITY_DN5152_c0_g2_i4
2036150	M:0	F:12	p:0.000399051	pcorr:0.000399051	POL4_DROMERetrovirus-related Pol polyprotein from transposon 412 OS=Drosophila melanogaster OX=7227 GN=POL PE=4 SV=1	Choren_v00_mik.OX359200.1G623.1	TRINITY_DN5152_c0_g2_i10
2036150	M:0	F:12	p:0.000399051	pcorr:0.000399051	POL3_DROMERetrovirus-related Pol polyprotein from transposon 17.6 OS=Drosophila melanogaster OX=7227 GN=pol PE=4 SV=1	Choren_v00_mik.OX359200.1G623.1	TRINITY_DN45256_c0_g1_i1
2036642	M:0	F:9	p:0.012518	pcorr:0.012518	SECA_SOLUEProtein translocase subunit SecA OS=Solibacter usitatus (strain Ellin6076) OX=234267 GN=secA PE=3 SV=1	#N/A	TRINITY_DN69349_c0_g1_i9
2037552	M:0	F:13	p:6.87148e-05	pcorr:6.87148e-05	-	Choren_v00_mik.OX359189.1G802.1	TRINITY_DN3140_c1_g2_i9
2037552	M:0	F:13	p:6.87148e-05	pcorr:6.87148e-05	-	Choren_v00_mik.OX359189.1G802.1	TRINITY_DN3140_c1_g2_i1
2037552	M:0	F:13	p:6.87148e-05	pcorr:6.87148e-05	-	Choren_v00_mik.OX359189.1G802.1	TRINITY_DN3140_c1_g2_i7
2037552	M:0	F:13	p:6.87148e-05	pcorr:6.87148e-05	-	Choren_v00_mik.OX359189.1G802.1	TRINITY_DN3140_c1_g2_i2
2037552	M:0	F:13	p:6.87148e-05	pcorr:6.87148e-05	-	Choren_v00_mik.OX359189.1G802.1	TRINITY_DN16500_c0_g1_i1
2038922	M:7	F:5	p:0.0277373	pcorr:0.0277373	ABCGO_DICDIABC transporter G family member 24 OS=Dictyostelium discoideum OX=44689 GN=abcG24 PE=3 SV=1	Choren_v00_mik.OX359190.1G1472.1	TRINITY_DN3962_c0_g1_i1
2038922	M:7	F:5	p:0.0277373	pcorr:0.0277373	ADP1_YEASTProbable ATP-dependent permease OS=Saccharomyces cerevisiae (strain ATCC 204508 / S288c) OX=559292 GN=ADP1 PE=1 SV=2	Choren_v00_mik.OX359190.1G1472.1	TRINITY_DN3962_c0_g1_i4
2038922	M:7	F:5	p:0.0277373	pcorr:0.0277373	ABCGO_DICDIABC transporter G family member 24 OS=Dictyostelium discoideum OX=44689 GN=abcG24 PE=3 SV=1	Choren_v00_mik.OX359190.1G1472.1	TRINITY_DN3962_c0_g1_i14
2038922	M:7	F:5	p:0.0277373	pcorr:0.0277373	ABCGO_DICDIABC transporter G family member 24 OS=Dictyostelium discoideum OX=44689 GN=abcG24 PE=3 SV=1	Choren_v00_mik.OX359190.1G1472.1	TRINITY_DN3962_c0_g1_i16
2038922	M:7	F:5	p:0.0277373	pcorr:0.0277373	ABCGO_DICDIABC transporter G family member 24 OS=Dictyostelium discoideum OX=44689 GN=abcG24 PE=3 SV=1	Choren_v00_mik.OX359190.1G1472.1	TRINITY_DN3962_c0_g1_i17
2039293	M:5	F:1	p:0.0140786	pcorr:0.0140786	-	Choren_v00_mik.OX359193.1G904.1	TRINITY_DN2168_c0_g1_i3
2039293	M:5	F:1	p:0.0140786	pcorr:0.0140786	-	Choren_v00_mik.OX359193.1G904.1	TRINITY_DN2168_c0_g1_i4
2039293	M:5	F:1	p:0.0140786	pcorr:0.0140786	-	Choren_v00_mik.OX359193.1G904.1	TRINITY_DN2168_c0_g1_i6
2039293	M:5	F:1	p:0.0140786	pcorr:0.0140786	-	Choren_v00_mik.OX359193.1G904.1	TRINITY_DN2168_c0_g1_i1
2039293	M:5	F:1	p:0.0140786	pcorr:0.0140786	-	Choren_v00_mik.OX359193.1G904.1	TRINITY_DN2168_c0_g1_i2
2040436	M:5	F:2	p:0.0439132	pcorr:0.0439132	-	#N/A	TRINITY_DN14110_c0_g1_i2
2040436	M:5	F:2	p:0.0439132	pcorr:0.0439132	-	#N/A	TRINITY_DN14110_c0_g1_i8
2040436	M:5	F:2	p:0.0439132	pcorr:0.0439132	-	#N/A	TRINITY_DN14110_c0_g1_i3
2040436	M:5	F:2	p:0.0439132	pcorr:0.0439132	-	#N/A	TRINITY_DN14110_c0_g1_i10
2040436	M:5	F:2	p:0.0439132	pcorr:0.0439132	-	#N/A	TRINITY_DN14110_c0_g1_i11
2042089	M:5	F:1	p:0.0140786	pcorr:0.0140786	-	Choren_v00_mik.OX359190.1G1378.1	TRINITY_DN1944_c0_g1_i3
2042089	M:5	F:1	p:0.0140786	pcorr:0.0140786	-	Choren_v00_mik.OX359190.1G1378.1	TRINITY_DN1944_c0_g1_i8
2042089	M:5	F:1	p:0.0140786	pcorr:0.0140786	-	Choren_v00_mik.OX359190.1G1378.1	TRINITY_DN1944_c0_g1_i16
2042089	M:5	F:1	p:0.0140786	pcorr:0.0140786	-	Choren_v00_mik.OX359190.1G1378.1	TRINITY_DN1944_c0_g1_i4
2042089	M:5	F:1	p:0.0140786	pcorr:0.0140786	-	Choren_v00_mik.OX359190.1G1378.1	TRINITY_DN1944_c0_g1_i7
2042844	M:6	F:2	p:0.00977293	pcorr:0.00977293	-	#N/A	TRINITY_DN4884_c2_g1_i2
2042844	M:6	F:2	p:0.00977293	pcorr:0.00977293	-	#N/A	TRINITY_DN4884_c2_g1_i11
2042844	M:6	F:2	p:0.00977293	pcorr:0.00977293	-	#N/A	TRINITY_DN4884_c2_g1_i5
2042844	M:6	F:2	p:0.00977293	pcorr:0.00977293	-	#N/A	TRINITY_DN18258_c0_g2_i1
2042844	M:6	F:2	p:0.00977293	pcorr:0.00977293	-	#N/A	TRINITY_DN18258_c0_g1_i1
2043664	M:4	F:0	p:0.0138458	pcorr:0.0138458	-	#N/A	TRINITY_DN84829_c0_g1_i1
2043984	M:1	F:11	p:0.00977293	pcorr:0.00977293	PAR14_HUMANProtein mono-ADP-ribosyltransferase PARP14 OS=Homo sapiens OX=9606 GN=PARP14 PE=1 SV=3	Choren_v00_mik.OX359201.1G307.1	TRINITY_DN2852_c0_g1_i13
2043984	M:1	F:11	p:0.00977293	pcorr:0.00977293	PAR14_HUMANProtein mono-ADP-ribosyltransferase PARP14 OS=Homo sapiens OX=9606 GN=PARP14 PE=1 SV=3	Choren_v00_mik.OX359201.1G307.1	TRINITY_DN2852_c0_g1_i12
2043984	M:1	F:11	p:0.00977293	pcorr:0.00977293	PAR14_HUMANProtein mono-ADP-ribosyltransferase PARP14 OS=Homo sapiens OX=9606 GN=PARP14 PE=1 SV=3	Choren_v00_mik.OX359201.1G307.1	TRINITY_DN2852_c0_g1_i6
2043984	M:1	F:11	p:0.00977293	pcorr:0.00977293	PAR14_HUMANProtein mono-ADP-ribosyltransferase PARP14 OS=Homo sapiens OX=9606 GN=PARP14 PE=1 SV=3	Choren_v00_mik.OX359201.1G307.1	TRINITY_DN2852_c0_g1_i5
2043984	M:1	F:11	p:0.00977293	pcorr:0.00977293	PAR14_HUMANProtein mono-ADP-ribosyltransferase PARP14 OS=Homo sapiens OX=9606 GN=PARP14 PE=1 SV=3	Choren_v00_mik.OX359201.1G307.1	TRINITY_DN2852_c0_g1_i8
2044210	M:1	F:11	p:0.00977293	pcorr:0.00977293	-	Choren_v00_mik.OX359192.1G181.1	TRINITY_DN20596_c2_g1_i1
2044210	M:1	F:11	p:0.00977293	pcorr:0.00977293	PLXA3_HUMANPlexin-A3 OS=Homo sapiens OX=9606 GN=PLXNA3 PE=1 SV=3	Choren_v00_mik.OX359192.1G181.1	TRINITY_DN3711_c0_g2_i20
2044210	M:1	F:11	p:0.00977293	pcorr:0.00977293	PLXA4_MOUSEPlexin-A4 OS=Mus musculus OX=10090 GN=Plxna4 PE=1 SV=3	Choren_v00_mik.OX359192.1G181.1	TRINITY_DN3711_c0_g2_i7
2044210	M:1	F:11	p:0.00977293	pcorr:0.00977293	PLXA3_HUMANPlexin-A3 OS=Homo sapiens OX=9606 GN=PLXNA3 PE=1 SV=3	Choren_v00_mik.OX359192.1G181.1	TRINITY_DN3711_c0_g2_i21
2044210	M:1	F:11	p:0.00977293	pcorr:0.00977293	PLXB1_MOUSEPlexin-B1 OS=Mus musculus OX=10090 GN=Plxnb1 PE=1 SV=2	Choren_v00_mik.OX359192.1G181.1	TRINITY_DN3711_c0_g2_i19
2044929	M:0	F:8	p:0.0277373	pcorr:0.0277373	-	#N/A	TRINITY_DN4804_c1_g1_i6
2044929	M:0	F:8	p:0.0277373	pcorr:0.0277373	-	#N/A	TRINITY_DN4804_c1_g1_i3
2044929	M:0	F:8	p:0.0277373	pcorr:0.0277373	-	#N/A	TRINITY_DN96266_c0_g1_i5
2044929	M:0	F:8	p:0.0277373	pcorr:0.0277373	-	#N/A	TRINITY_DN1829_c2_g1_i8
2044929	M:0	F:8	p:0.0277373	pcorr:0.0277373	-	#N/A	TRINITY_DN1829_c2_g1_i14
2045070	M:5	F:2	p:0.0439132	pcorr:0.0439132	TBC13_HUMANTBC1 domain family member 13 OS=Homo sapiens OX=9606 GN=TBC1D13 PE=1 SV=3	Choren_v00_mik.OX359192.1G1046.1	TRINITY_DN345_c0_g1_i4
2045070	M:5	F:2	p:0.0439132	pcorr:0.0439132	TBC13_HUMANTBC1 domain family member 13 OS=Homo sapiens OX=9606 GN=TBC1D13 PE=1 SV=3	Choren_v00_mik.OX359192.1G1046.1	TRINITY_DN345_c0_g1_i16
2045070	M:5	F:2	p:0.0439132	pcorr:0.0439132	LORF2_HUMANLINE-1 retrotransposable element ORF2 protein OS=Homo sapiens OX=9606 PE=1 SV=1	Choren_v00_mik.OX359192.1G1046.1	TRINITY_DN345_c0_g1_i19
2045070	M:5	F:2	p:0.0439132	pcorr:0.0439132	LORF2_HUMANLINE-1 retrotransposable element ORF2 protein OS=Homo sapiens OX=9606 PE=1 SV=1	Choren_v00_mik.OX359192.1G1046.1	TRINITY_DN345_c0_g1_i15
2045070	M:5	F:2	p:0.0439132	pcorr:0.0439132	TBC13_HUMANTBC1 domain family member 13 OS=Homo sapiens OX=9606 GN=TBC1D13 PE=1 SV=3	Choren_v00_mik.OX359192.1G1046.1	TRINITY_DN345_c0_g1_i20
2048939	M:1	F:10	p:0.0267948	pcorr:0.0267948	-	#N/A	TRINITY_DN3085_c0_g1_i5
2048939	M:1	F:10	p:0.0267948	pcorr:0.0267948	-	#N/A	TRINITY_DN40404_c0_g3_i1
2048939	M:1	F:10	p:0.0267948	pcorr:0.0267948	S39A9_HUMANZinc transporter ZIP9 OS=Homo sapiens OX=9606 GN=SLC39A9 PE=1 SV=2	#N/A	TRINITY_DN3247_c0_g1_i5
2048939	M:1	F:10	p:0.0267948	pcorr:0.0267948	-	#N/A	TRINITY_DN3247_c0_g1_i13
2048939	M:1	F:10	p:0.0267948	pcorr:0.0267948	RAB43_HUMANRas-related protein Rab-43 OS=Homo sapiens OX=9606 GN=RAB43 PE=1 SV=1	#N/A	TRINITY_DN8545_c0_g1_i11
2049809	M:0	F:13	p:6.87148e-05	pcorr:6.87148e-05	-	Choren_v00_mik.OX359201.1G549.1	TRINITY_DN26024_c0_g1_i2
2049809	M:0	F:13	p:6.87148e-05	pcorr:6.87148e-05	-	Choren_v00_mik.OX359201.1G549.1	TRINITY_DN26024_c0_g1_i3
2049809	M:0	F:13	p:6.87148e-05	pcorr:6.87148e-05	-	Choren_v00_mik.OX359201.1G549.1	TRINITY_DN26024_c0_g1_i1
2049809	M:0	F:13	p:6.87148e-05	pcorr:6.87148e-05	Y8045_DICDIProbable poly	Choren_v00_mik.OX359201.1G549.1	TRINITY_DN1126_c0_g1_i8
2049809	M:0	F:13	p:6.87148e-05	pcorr:6.87148e-05	SACS_HUMANSacsin OS=Homo sapiens OX=9606 GN=SACS PE=1 SV=2	Choren_v00_mik.OX359201.1G549.1	TRINITY_DN1126_c0_g1_i13
2051802	M:0	F:11	p:0.00159493	pcorr:0.00159493	PO21_NASVIRetrovirus-related Pol polyprotein from type-1 retrotransposable element R2 (Fragment) OS=Nasonia vitripennis OX=7425 PE=4 SV=2	Choren_v00_mik.OX359192.1G520.1	TRINITY_DN1825_c1_g1_i12
2051802	M:0	F:11	p:0.00159493	pcorr:0.00159493	PO21_NASVIRetrovirus-related Pol polyprotein from type-1 retrotransposable element R2 (Fragment) OS=Nasonia vitripennis OX=7425 PE=4 SV=2	Choren_v00_mik.OX359192.1G520.1	TRINITY_DN1825_c1_g1_i4
2051802	M:0	F:11	p:0.00159493	pcorr:0.00159493	PO21_NASVIRetrovirus-related Pol polyprotein from type-1 retrotransposable element R2 (Fragment) OS=Nasonia vitripennis OX=7425 PE=4 SV=2	Choren_v00_mik.OX359192.1G520.1	TRINITY_DN1825_c1_g1_i15
2051802	M:0	F:11	p:0.00159493	pcorr:0.00159493	PO21_NASVIRetrovirus-related Pol polyprotein from type-1 retrotransposable element R2 (Fragment) OS=Nasonia vitripennis OX=7425 PE=4 SV=2	Choren_v00_mik.OX359192.1G520.1	TRINITY_DN1825_c1_g1_i6
2051802	M:0	F:11	p:0.00159493	pcorr:0.00159493	-	Choren_v00_mik.OX359192.1G520.1	TRINITY_DN98110_c0_g3_i1
2053625	M:3	F:13	p:0.0138458	pcorr:0.0138458	B4GN3_HUMANBeta-1,4-N-acetylgalactosaminyltransferase 3 OS=Homo sapiens OX=9606 GN=B4GALNT3 PE=1 SV=2	#N/A	TRINITY_DN4107_c0_g1_i1
2053625	M:3	F:13	p:0.0138458	pcorr:0.0138458	B4GN3_HUMANBeta-1,4-N-acetylgalactosaminyltransferase 3 OS=Homo sapiens OX=9606 GN=B4GALNT3 PE=1 SV=2	#N/A	TRINITY_DN4107_c0_g1_i16
2054357	M:0	F:13	p:6.87148e-05	pcorr:6.87148e-05	-	Choren_v00_mik.OX359192.1G511.1	TRINITY_DN1162_c0_g1_i5
2054357	M:0	F:13	p:6.87148e-05	pcorr:6.87148e-05	-	Choren_v00_mik.OX359192.1G511.1	TRINITY_DN1162_c0_g1_i9
2054357	M:0	F:13	p:6.87148e-05	pcorr:6.87148e-05	-	Choren_v00_mik.OX359192.1G511.1	TRINITY_DN41078_c0_g1_i1
2054776	M:1	F:11	p:0.00977293	pcorr:0.00977293	-	Choren_v00_mik.OX359194.1G66.1	TRINITY_DN1150_c0_g2_i1
2055100	M:5	F:1	p:0.0140786	pcorr:0.0140786	-	#N/A	TRINITY_DN86370_c0_g2_i3
2055100	M:5	F:1	p:0.0140786	pcorr:0.0140786	-	#N/A	TRINITY_DN2319_c0_g1_i10
2055100	M:5	F:1	p:0.0140786	pcorr:0.0140786	-	#N/A	TRINITY_DN2319_c0_g1_i11
2055100	M:5	F:1	p:0.0140786	pcorr:0.0140786	-	#N/A	TRINITY_DN2319_c0_g1_i16
2055100	M:5	F:1	p:0.0140786	pcorr:0.0140786	-	#N/A	TRINITY_DN2319_c0_g1_i14
2056881	M:7	F:3	p:0.00491056	pcorr:0.00491056	SD11_ARATHG-type lectin S-receptor-like serine/threonine-protein kinase SD1-1 OS=Arabidopsis thaliana OX=3702 GN=SD11 PE=1 SV=1	Choren_v00_mik.OX359197.1G650.1	TRINITY_DN267_c0_g1_i12
2056881	M:7	F:3	p:0.00491056	pcorr:0.00491056	EMS1_ARATHLeucine-rich repeat receptor protein kinase EMS1 OS=Arabidopsis thaliana OX=3702 GN=EMS1 PE=1 SV=1	Choren_v00_mik.OX359197.1G650.1	TRINITY_DN267_c0_g1_i13
2056881	M:7	F:3	p:0.00491056	pcorr:0.00491056	TRK1_LYMSTPutative neurotrophin receptor LTRK 1 OS=Lymnaea stagnalis OX=6523 PE=2 SV=1	Choren_v00_mik.OX359197.1G650.1	TRINITY_DN39511_c0_g1_i8
2056881	M:7	F:3	p:0.00491056	pcorr:0.00491056	Y9853_DICDIProbable serine/threonine-protein kinase DDB_G0271538 OS=Dictyostelium discoideum OX=44689 GN=DDB_G0271538 PE=3 SV=1	Choren_v00_mik.OX359197.1G650.1	TRINITY_DN39511_c0_g1_i5
2056881	M:7	F:3	p:0.00491056	pcorr:0.00491056	Y9853_DICDIProbable serine/threonine-protein kinase DDB_G0271538 OS=Dictyostelium discoideum OX=44689 GN=DDB_G0271538 PE=3 SV=1	Choren_v00_mik.OX359197.1G650.1	TRINITY_DN39511_c0_g1_i3
2057394	M:3	F:13	p:0.0138458	pcorr:0.0138458	-	#N/A	TRINITY_DN139670_c0_g1_i1
2058930	M:6	F:1	p:0.00271931	pcorr:0.00271931	YRD6_CAEELUncharacterized protein K02A2.6 OS=Caenorhabditis elegans OX=6239 GN=K02A2.6 PE=4 SV=1	#N/A	TRINITY_DN10233_c1_g2_i4
2058930	M:6	F:1	p:0.00271931	pcorr:0.00271931	TF212_SCHPOTransposon Tf2-12 polyprotein OS=Schizosaccharomyces pombe (strain 972 / ATCC 24843) OX=284812 GN=Tf2-12 PE=3 SV=1	#N/A	TRINITY_DN10233_c1_g2_i7
2058930	M:6	F:1	p:0.00271931	pcorr:0.00271931	YRD6_CAEELUncharacterized protein K02A2.6 OS=Caenorhabditis elegans OX=6239 GN=K02A2.6 PE=4 SV=1	#N/A	TRINITY_DN10233_c1_g2_i1
2058930	M:6	F:1	p:0.00271931	pcorr:0.00271931	YRD6_CAEELUncharacterized protein K02A2.6 OS=Caenorhabditis elegans OX=6239 GN=K02A2.6 PE=4 SV=1	#N/A	TRINITY_DN10233_c1_g2_i3
2058930	M:6	F:1	p:0.00271931	pcorr:0.00271931	TF212_SCHPOTransposon Tf2-12 polyprotein OS=Schizosaccharomyces pombe (strain 972 / ATCC 24843) OX=284812 GN=Tf2-12 PE=3 SV=1	#N/A	TRINITY_DN10233_c1_g2_i6
2060526	M:3	F:13	p:0.0138458	pcorr:0.0138458	ZMYM1_HUMANZinc finger MYM-type protein 1 OS=Homo sapiens OX=9606 GN=ZMYM1 PE=1 SV=1	#N/A	TRINITY_DN27425_c0_g1_i9
2060526	M:3	F:13	p:0.0138458	pcorr:0.0138458	ZMYM1_HUMANZinc finger MYM-type protein 1 OS=Homo sapiens OX=9606 GN=ZMYM1 PE=1 SV=1	#N/A	TRINITY_DN27425_c0_g1_i8
2061485	M:0	F:13	p:6.87148e-05	pcorr:6.87148e-05	-	#N/A	TRINITY_DN81791_c0_g1_i5
2061485	M:0	F:13	p:6.87148e-05	pcorr:6.87148e-05	-	#N/A	TRINITY_DN56487_c0_g1_i3
2061485	M:0	F:13	p:6.87148e-05	pcorr:6.87148e-05	-	#N/A	TRINITY_DN56487_c0_g1_i1
2061485	M:0	F:13	p:6.87148e-05	pcorr:6.87148e-05	-	#N/A	TRINITY_DN56487_c0_g1_i2
2061485	M:0	F:13	p:6.87148e-05	pcorr:6.87148e-05	-	#N/A	TRINITY_DN58800_c0_g5_i1
2062851	M:5	F:2	p:0.0439132	pcorr:0.0439132	SCP2_RABITSterol carrier protein 2 OS=Oryctolagus cuniculus OX=9986 GN=SCP2 PE=1 SV=1	Choren_v00_mik.OX359194.1G777.1	TRINITY_DN1782_c0_g1_i4
2062851	M:5	F:2	p:0.0439132	pcorr:0.0439132	SCP2_RABITSterol carrier protein 2 OS=Oryctolagus cuniculus OX=9986 GN=SCP2 PE=1 SV=1	Choren_v00_mik.OX359194.1G777.1	TRINITY_DN1782_c0_g1_i25
2062851	M:5	F:2	p:0.0439132	pcorr:0.0439132	SCP2_RABITSterol carrier protein 2 OS=Oryctolagus cuniculus OX=9986 GN=SCP2 PE=1 SV=1	Choren_v00_mik.OX359194.1G777.1	TRINITY_DN1782_c0_g1_i10
2062851	M:5	F:2	p:0.0439132	pcorr:0.0439132	SCP2_RABITSterol carrier protein 2 OS=Oryctolagus cuniculus OX=9986 GN=SCP2 PE=1 SV=1	Choren_v00_mik.OX359194.1G777.1	TRINITY_DN1782_c0_g1_i8
2062851	M:5	F:2	p:0.0439132	pcorr:0.0439132	SCP2_RABITSterol carrier protein 2 OS=Oryctolagus cuniculus OX=9986 GN=SCP2 PE=1 SV=1	Choren_v00_mik.OX359194.1G777.1	TRINITY_DN1782_c0_g1_i24
2066020	M:5	F:2	p:0.0439132	pcorr:0.0439132	YWRD_BACSUGlutathione hydrolase-like YwrD proenzyme OS=Bacillus subtilis (strain 168) OX=224308 GN=ywrD PE=1 SV=1	#N/A	TRINITY_DN46850_c0_g1_i1
2066020	M:5	F:2	p:0.0439132	pcorr:0.0439132	YWRD_BACSUGlutathione hydrolase-like YwrD proenzyme OS=Bacillus subtilis (strain 168) OX=224308 GN=ywrD PE=1 SV=1	#N/A	TRINITY_DN46850_c0_g1_i4
2067788	M:0	F:13	p:6.87148e-05	pcorr:6.87148e-05	-	Choren_v00_mik.OX359192.1G506.1	TRINITY_DN9070_c0_g1_i11
2067788	M:0	F:13	p:6.87148e-05	pcorr:6.87148e-05	-	Choren_v00_mik.OX359192.1G506.1	TRINITY_DN9070_c0_g1_i6
2069072	M:1	F:11	p:0.00977293	pcorr:0.00977293	-	#N/A	TRINITY_DN95668_c0_g1_i1
2070006	M:0	F:8	p:0.0277373	pcorr:0.0277373	-	Choren_v00_mik.OX359201.1G140.4	TRINITY_DN16928_c0_g2_i5
2070006	M:0	F:8	p:0.0277373	pcorr:0.0277373	-	Choren_v00_mik.OX359201.1G140.4	TRINITY_DN16928_c0_g2_i5
2070006	M:0	F:8	p:0.0277373	pcorr:0.0277373	-	Choren_v00_mik.OX359201.1G140.4	TRINITY_DN16928_c0_g2_i5
2070006	M:0	F:8	p:0.0277373	pcorr:0.0277373	-	Choren_v00_mik.OX359201.1G140.4	TRINITY_DN16928_c0_g2_i4
2070006	M:0	F:8	p:0.0277373	pcorr:0.0277373	-	Choren_v00_mik.OX359201.1G140.4	TRINITY_DN16928_c0_g2_i3
2070006	M:0	F:8	p:0.0277373	pcorr:0.0277373	-	Choren_v00_mik.OX359201.1G140.4	TRINITY_DN16928_c0_g2_i3
2070006	M:0	F:8	p:0.0277373	pcorr:0.0277373	-	Choren_v00_mik.OX359201.1G140.4	TRINITY_DN4286_c1_g1_i5
2070006	M:0	F:8	p:0.0277373	pcorr:0.0277373	-	Choren_v00_mik.OX359201.1G140.4	TRINITY_DN4286_c1_g1_i5
2070006	M:0	F:8	p:0.0277373	pcorr:0.0277373	-	Choren_v00_mik.OX359201.1G140.4	TRINITY_DN4286_c1_g1_i5
2070006	M:0	F:8	p:0.0277373	pcorr:0.0277373	-	Choren_v00_mik.OX359201.1G140.4	TRINITY_DN47936_c0_g1_i6
2070006	M:0	F:8	p:0.0277373	pcorr:0.0277373	-	Choren_v00_mik.OX359201.1G140.4	TRINITY_DN47936_c0_g1_i6
2070916	M:0	F:13	p:6.87148e-05	pcorr:6.87148e-05	-	Choren_v00_mik.OX359192.1G235.1	TRINITY_DN26574_c0_g1_i4
2070916	M:0	F:13	p:6.87148e-05	pcorr:6.87148e-05	-	Choren_v00_mik.OX359192.1G235.1	TRINITY_DN7826_c2_g1_i1
2070916	M:0	F:13	p:6.87148e-05	pcorr:6.87148e-05	-	Choren_v00_mik.OX359192.1G235.1	TRINITY_DN2449_c0_g1_i8
2070916	M:0	F:13	p:6.87148e-05	pcorr:6.87148e-05	-	Choren_v00_mik.OX359192.1G235.1	TRINITY_DN2449_c0_g1_i10
2070916	M:0	F:13	p:6.87148e-05	pcorr:6.87148e-05	-	Choren_v00_mik.OX359192.1G235.1	TRINITY_DN2449_c0_g1_i6
2072383	M:5	F:2	p:0.0439132	pcorr:0.0439132	-	#N/A	TRINITY_DN106830_c0_g1_i1
2072630	M:0	F:8	p:0.0277373	pcorr:0.0277373	-	Choren_v00_mik.OX359190.1G437.1	TRINITY_DN31811_c0_g1_i12
2072630	M:0	F:8	p:0.0277373	pcorr:0.0277373	-	Choren_v00_mik.OX359190.1G437.1	TRINITY_DN31811_c0_g1_i5
2072630	M:0	F:8	p:0.0277373	pcorr:0.0277373	-	Choren_v00_mik.OX359190.1G437.1	TRINITY_DN31811_c0_g1_i11
2072630	M:0	F:8	p:0.0277373	pcorr:0.0277373	-	Choren_v00_mik.OX359190.1G437.1	TRINITY_DN4358_c0_g1_i15
2072630	M:0	F:8	p:0.0277373	pcorr:0.0277373	-	Choren_v00_mik.OX359190.1G437.1	TRINITY_DN4358_c0_g1_i15
2072630	M:0	F:8	p:0.0277373	pcorr:0.0277373	-	Choren_v00_mik.OX359190.1G437.1	TRINITY_DN4358_c0_g1_i15
2072630	M:0	F:8	p:0.0277373	pcorr:0.0277373	-	Choren_v00_mik.OX359190.1G437.1	TRINITY_DN4358_c0_g1_i10
2072630	M:0	F:8	p:0.0277373	pcorr:0.0277373	-	Choren_v00_mik.OX359190.1G437.1	TRINITY_DN4358_c0_g1_i10
2072630	M:0	F:8	p:0.0277373	pcorr:0.0277373	-	Choren_v00_mik.OX359190.1G437.1	TRINITY_DN4358_c0_g1_i10
2072692	M:5	F:2	p:0.0439132	pcorr:0.0439132	-	#N/A	TRINITY_DN9990_c1_g1_i4
2072692	M:5	F:2	p:0.0439132	pcorr:0.0439132	-	#N/A	TRINITY_DN9990_c1_g1_i7
2072692	M:5	F:2	p:0.0439132	pcorr:0.0439132	-	#N/A	TRINITY_DN9990_c1_g1_i1
2072692	M:5	F:2	p:0.0439132	pcorr:0.0439132	-	#N/A	TRINITY_DN19164_c0_g2_i1
2072692	M:5	F:2	p:0.0439132	pcorr:0.0439132	-	#N/A	TRINITY_DN385_c1_g1_i3
2072925	M:2	F:11	p:0.0439132	pcorr:0.0439132	-	#N/A	TRINITY_DN67601_c0_g1_i1
2073207	M:6	F:3	p:0.0267948	pcorr:0.0267948	-	#N/A	TRINITY_DN17526_c0_g1_i8
2073207	M:6	F:3	p:0.0267948	pcorr:0.0267948	-	#N/A	TRINITY_DN17526_c0_g1_i7
2073338	M:2	F:13	p:0.00290775	pcorr:0.00290775	TIGD4_MOUSETigger transposable element-derived protein 4 OS=Mus musculus OX=10090 GN=Tigd4 PE=2 SV=1	Choren_v00_mik.OX359199.1G370.1	TRINITY_DN356_c0_g2_i5
2073338	M:2	F:13	p:0.00290775	pcorr:0.00290775	TIGD4_MOUSETigger transposable element-derived protein 4 OS=Mus musculus OX=10090 GN=Tigd4 PE=2 SV=1	Choren_v00_mik.OX359199.1G370.1	TRINITY_DN356_c0_g2_i8
2073338	M:2	F:13	p:0.00290775	pcorr:0.00290775	TIGD4_MOUSETigger transposable element-derived protein 4 OS=Mus musculus OX=10090 GN=Tigd4 PE=2 SV=1	Choren_v00_mik.OX359199.1G370.1	TRINITY_DN356_c0_g2_i4
2073338	M:2	F:13	p:0.00290775	pcorr:0.00290775	TIGD4_MOUSETigger transposable element-derived protein 4 OS=Mus musculus OX=10090 GN=Tigd4 PE=2 SV=1	Choren_v00_mik.OX359199.1G370.1	TRINITY_DN356_c0_g2_i14
2073338	M:2	F:13	p:0.00290775	pcorr:0.00290775	TIGD4_MOUSETigger transposable element-derived protein 4 OS=Mus musculus OX=10090 GN=Tigd4 PE=2 SV=1	Choren_v00_mik.OX359199.1G370.1	TRINITY_DN356_c0_g2_i10
2073517	M:0	F:13	p:6.87148e-05	pcorr:6.87148e-05	-	Choren_v00_mik.OX359192.1G235.1	TRINITY_DN2928_c2_g1_i1
2073517	M:0	F:13	p:6.87148e-05	pcorr:6.87148e-05	-	Choren_v00_mik.OX359192.1G235.1	TRINITY_DN2928_c2_g1_i3
2073517	M:0	F:13	p:6.87148e-05	pcorr:6.87148e-05	-	Choren_v00_mik.OX359192.1G235.1	TRINITY_DN2928_c2_g1_i2
2073517	M:0	F:13	p:6.87148e-05	pcorr:6.87148e-05	SLX1_MOUSEStructure-specific endonuclease subunit SLX1 OS=Mus musculus OX=10090 GN=Slx1b PE=2 SV=1	Choren_v00_mik.OX359192.1G235.1	TRINITY_DN29139_c0_g1_i2
2073517	M:0	F:13	p:6.87148e-05	pcorr:6.87148e-05	SLX1_XENLAStructure-specific endonuclease subunit slx1 OS=Xenopus laevis OX=8355 GN=slx1a PE=2 SV=1	Choren_v00_mik.OX359192.1G235.1	TRINITY_DN29139_c0_g1_i3
2074600	M:0	F:8	p:0.0277373	pcorr:0.0277373	-	Choren_v00_mik.OX359199.1G311.1	TRINITY_DN666_c0_g1_i1
2074600	M:0	F:8	p:0.0277373	pcorr:0.0277373	-	Choren_v00_mik.OX359199.1G311.1	TRINITY_DN666_c0_g1_i1
2074600	M:0	F:8	p:0.0277373	pcorr:0.0277373	-	Choren_v00_mik.OX359199.1G311.1	TRINITY_DN666_c0_g1_i19
2074600	M:0	F:8	p:0.0277373	pcorr:0.0277373	-	Choren_v00_mik.OX359199.1G311.1	TRINITY_DN666_c0_g1_i19
2074600	M:0	F:8	p:0.0277373	pcorr:0.0277373	-	Choren_v00_mik.OX359199.1G311.1	TRINITY_DN666_c0_g1_i20
2074600	M:0	F:8	p:0.0277373	pcorr:0.0277373	-	Choren_v00_mik.OX359199.1G311.1	TRINITY_DN666_c0_g1_i20
2074600	M:0	F:8	p:0.0277373	pcorr:0.0277373	-	Choren_v00_mik.OX359199.1G311.1	TRINITY_DN666_c0_g1_i8
2074600	M:0	F:8	p:0.0277373	pcorr:0.0277373	-	Choren_v00_mik.OX359199.1G311.1	TRINITY_DN666_c0_g1_i8
2074600	M:0	F:8	p:0.0277373	pcorr:0.0277373	-	Choren_v00_mik.OX359199.1G311.1	TRINITY_DN666_c0_g1_i21
2074600	M:0	F:8	p:0.0277373	pcorr:0.0277373	-	Choren_v00_mik.OX359199.1G311.1	TRINITY_DN666_c0_g1_i21
2075099	M:0	F:13	p:6.87148e-05	pcorr:6.87148e-05	CFDP2_BOVINCraniofacial development protein 2 OS=Bos taurus OX=9913 GN=CFDP2 PE=1 SV=2	Choren_v00_mik.OX359198.1G474.1	TRINITY_DN14755_c0_g1_i6
2075099	M:0	F:13	p:6.87148e-05	pcorr:6.87148e-05	CFDP2_BOVINCraniofacial development protein 2 OS=Bos taurus OX=9913 GN=CFDP2 PE=1 SV=2	Choren_v00_mik.OX359198.1G474.1	TRINITY_DN14755_c0_g1_i9
2075099	M:0	F:13	p:6.87148e-05	pcorr:6.87148e-05	CFDP2_BOVINCraniofacial development protein 2 OS=Bos taurus OX=9913 GN=CFDP2 PE=1 SV=2	Choren_v00_mik.OX359198.1G474.1	TRINITY_DN14755_c0_g1_i8
2075801	M:2	F:11	p:0.0439132	pcorr:0.0439132	-	#N/A	TRINITY_DN211056_c0_g1_i1
2076268	M:5	F:2	p:0.0439132	pcorr:0.0439132	-	#N/A	TRINITY_DN90_c3_g2_i2
2076268	M:5	F:2	p:0.0439132	pcorr:0.0439132	-	#N/A	TRINITY_DN90_c3_g2_i3
2076268	M:5	F:2	p:0.0439132	pcorr:0.0439132	-	#N/A	TRINITY_DN90_c3_g2_i1
2076268	M:5	F:2	p:0.0439132	pcorr:0.0439132	-	#N/A	TRINITY_DN40166_c0_g1_i11
2076268	M:5	F:2	p:0.0439132	pcorr:0.0439132	-	#N/A	TRINITY_DN40166_c0_g1_i1
2076704	M:2	F:11	p:0.0439132	pcorr:0.0439132	-	#N/A	TRINITY_DN8659_c0_g1_i3
2076704	M:2	F:11	p:0.0439132	pcorr:0.0439132	-	#N/A	TRINITY_DN8659_c0_g1_i2
2076704	M:2	F:11	p:0.0439132	pcorr:0.0439132	-	#N/A	TRINITY_DN5574_c0_g1_i3
2076704	M:2	F:11	p:0.0439132	pcorr:0.0439132	-	#N/A	TRINITY_DN5574_c0_g1_i5
2076704	M:2	F:11	p:0.0439132	pcorr:0.0439132	-	#N/A	TRINITY_DN5574_c0_g1_i2
2081067	M:2	F:11	p:0.0439132	pcorr:0.0439132	CHST9_MOUSECarbohydrate sulfotransferase 9 OS=Mus musculus OX=10090 GN=Chst9 PE=2 SV=1	Choren_v00_mik.OX359195.1G585.1	TRINITY_DN4034_c1_g1_i3
2081067	M:2	F:11	p:0.0439132	pcorr:0.0439132	CHST9_MOUSECarbohydrate sulfotransferase 9 OS=Mus musculus OX=10090 GN=Chst9 PE=2 SV=1	Choren_v00_mik.OX359195.1G585.1	TRINITY_DN4034_c1_g1_i8
2081067	M:2	F:11	p:0.0439132	pcorr:0.0439132	CHSTE_HUMANCarbohydrate sulfotransferase 14 OS=Homo sapiens OX=9606 GN=CHST14 PE=1 SV=2	Choren_v00_mik.OX359195.1G585.1	TRINITY_DN4034_c1_g1_i9
2081067	M:2	F:11	p:0.0439132	pcorr:0.0439132	CHST9_MOUSECarbohydrate sulfotransferase 9 OS=Mus musculus OX=10090 GN=Chst9 PE=2 SV=1	Choren_v00_mik.OX359195.1G585.1	TRINITY_DN4034_c1_g1_i4
2081067	M:2	F:11	p:0.0439132	pcorr:0.0439132	CHSTE_HUMANCarbohydrate sulfotransferase 14 OS=Homo sapiens OX=9606 GN=CHST14 PE=1 SV=2	Choren_v00_mik.OX359195.1G585.1	TRINITY_DN4034_c1_g1_i5
2082110	M:0	F:13	p:6.87148e-05	pcorr:6.87148e-05	PTPRF_DANREReceptor-type tyrosine-protein phosphatase F OS=Danio rerio OX=7955 GN=ptprf PE=2 SV=1	#N/A	TRINITY_DN4246_c0_g1_i7
2082110	M:0	F:13	p:6.87148e-05	pcorr:6.87148e-05	PTPRF_MOUSEReceptor-type tyrosine-protein phosphatase F OS=Mus musculus OX=10090 GN=Ptprf PE=1 SV=1	#N/A	TRINITY_DN4246_c0_g1_i10
2082110	M:0	F:13	p:6.87148e-05	pcorr:6.87148e-05	PTPRF_MOUSEReceptor-type tyrosine-protein phosphatase F OS=Mus musculus OX=10090 GN=Ptprf PE=1 SV=1	#N/A	TRINITY_DN4246_c0_g1_i1
2082110	M:0	F:13	p:6.87148e-05	pcorr:6.87148e-05	PTPRF_MOUSEReceptor-type tyrosine-protein phosphatase F OS=Mus musculus OX=10090 GN=Ptprf PE=1 SV=1	#N/A	TRINITY_DN4246_c0_g1_i13
2082110	M:0	F:13	p:6.87148e-05	pcorr:6.87148e-05	PTPRF_MOUSEReceptor-type tyrosine-protein phosphatase F OS=Mus musculus OX=10090 GN=Ptprf PE=1 SV=1	#N/A	TRINITY_DN4246_c0_g1_i29
2084147	M:5	F:2	p:0.0439132	pcorr:0.0439132	CBPC6_MOUSECytosolic carboxypeptidase 6 OS=Mus musculus OX=10090 GN=Agbl4 PE=1 SV=1	#N/A	TRINITY_DN356_c0_g1_i4
2084147	M:5	F:2	p:0.0439132	pcorr:0.0439132	-	#N/A	TRINITY_DN356_c0_g1_i3
2084885	M:0	F:11	p:0.00159493	pcorr:0.00159493	-	Choren_v00_mik.OX359190.1G968.1	TRINITY_DN55058_c0_g1_i3
2084885	M:0	F:11	p:0.00159493	pcorr:0.00159493	-	Choren_v00_mik.OX359190.1G968.1	TRINITY_DN1162_c0_g1_i5
2084885	M:0	F:11	p:0.00159493	pcorr:0.00159493	-	Choren_v00_mik.OX359190.1G968.1	TRINITY_DN1162_c0_g1_i9
2084885	M:0	F:11	p:0.00159493	pcorr:0.00159493	-	Choren_v00_mik.OX359190.1G968.1	TRINITY_DN55058_c0_g1_i2
2085369	M:0	F:12	p:0.000399051	pcorr:0.000399051	-	Choren_v00_mik.OX359192.1G556.1	TRINITY_DN51938_c0_g1_i4
2085369	M:0	F:12	p:0.000399051	pcorr:0.000399051	-	Choren_v00_mik.OX359192.1G556.1	TRINITY_DN51938_c0_g1_i6
2085369	M:0	F:12	p:0.000399051	pcorr:0.000399051	-	Choren_v00_mik.OX359192.1G556.1	TRINITY_DN51938_c0_g1_i3
2086113	M:0	F:9	p:0.012518	pcorr:0.012518	-	#N/A	TRINITY_DN11441_c0_g1_i3
2086113	M:0	F:9	p:0.012518	pcorr:0.012518	-	#N/A	TRINITY_DN7771_c0_g1_i5
2086113	M:0	F:9	p:0.012518	pcorr:0.012518	-	#N/A	TRINITY_DN72825_c0_g1_i1
2086113	M:0	F:9	p:0.012518	pcorr:0.012518	-	#N/A	TRINITY_DN28929_c0_g2_i3
2086113	M:0	F:9	p:0.012518	pcorr:0.012518	-	#N/A	TRINITY_DN28929_c0_g2_i1
2093547	M:4	F:0	p:0.0138458	pcorr:0.0138458	-	#N/A	TRINITY_DN25866_c0_g1_i19
2093547	M:4	F:0	p:0.0138458	pcorr:0.0138458	-	#N/A	TRINITY_DN25866_c0_g1_i11
2093547	M:4	F:0	p:0.0138458	pcorr:0.0138458	-	#N/A	TRINITY_DN25866_c0_g1_i4
2093547	M:4	F:0	p:0.0138458	pcorr:0.0138458	-	#N/A	TRINITY_DN25866_c0_g1_i24
2093547	M:4	F:0	p:0.0138458	pcorr:0.0138458	-	#N/A	TRINITY_DN12144_c0_g1_i21
2094136	M:6	F:2	p:0.00977293	pcorr:0.00977293	UBP4_BOVINUbiquitin carboxyl-terminal hydrolase 4 OS=Bos taurus OX=9913 GN=USP4 PE=2 SV=1	Choren_v00_mik.OX359198.1G275.1	TRINITY_DN15765_c0_g1_i2
2094136	M:6	F:2	p:0.00977293	pcorr:0.00977293	UBP15_BOVINUbiquitin carboxyl-terminal hydrolase 15 OS=Bos taurus OX=9913 GN=USP15 PE=2 SV=1	Choren_v00_mik.OX359198.1G275.1	TRINITY_DN15765_c0_g1_i8
2094136	M:6	F:2	p:0.00977293	pcorr:0.00977293	SIS8_ARATHProbable serine/threonine-protein kinase SIS8 OS=Arabidopsis thaliana OX=3702 GN=SIS8 PE=1 SV=1	Choren_v00_mik.OX359198.1G275.1	TRINITY_DN2862_c0_g1_i2
2094136	M:6	F:2	p:0.00977293	pcorr:0.00977293	SIS8_ARATHProbable serine/threonine-protein kinase SIS8 OS=Arabidopsis thaliana OX=3702 GN=SIS8 PE=1 SV=1	Choren_v00_mik.OX359198.1G275.1	TRINITY_DN2862_c0_g1_i20
2094136	M:6	F:2	p:0.00977293	pcorr:0.00977293	UBP15_MOUSEUbiquitin carboxyl-terminal hydrolase 15 OS=Mus musculus OX=10090 GN=Usp15 PE=1 SV=1	Choren_v00_mik.OX359198.1G275.1	TRINITY_DN2862_c0_g1_i18
2095036	M:5	F:2	p:0.0439132	pcorr:0.0439132	-	Choren_v00_mik.OX359189.1G1461.1	TRINITY_DN17055_c0_g1_i4
2095036	M:5	F:2	p:0.0439132	pcorr:0.0439132	-	Choren_v00_mik.OX359189.1G1461.1	TRINITY_DN17055_c0_g1_i6
2095036	M:5	F:2	p:0.0439132	pcorr:0.0439132	-	Choren_v00_mik.OX359189.1G1461.1	TRINITY_DN17055_c0_g1_i10
2095036	M:5	F:2	p:0.0439132	pcorr:0.0439132	-	Choren_v00_mik.OX359189.1G1461.1	TRINITY_DN17055_c0_g1_i8
2095036	M:5	F:2	p:0.0439132	pcorr:0.0439132	-	Choren_v00_mik.OX359189.1G1461.1	TRINITY_DN3255_c0_g1_i2
2095934	M:4	F:0	p:0.0138458	pcorr:0.0138458	-	#N/A	TRINITY_DN4387_c0_g1_i2
2095934	M:4	F:0	p:0.0138458	pcorr:0.0138458	-	#N/A	TRINITY_DN4387_c0_g1_i1
2095934	M:4	F:0	p:0.0138458	pcorr:0.0138458	-	#N/A	TRINITY_DN4387_c0_g1_i4
2095934	M:4	F:0	p:0.0138458	pcorr:0.0138458	-	#N/A	TRINITY_DN4387_c0_g1_i3
2095934	M:4	F:0	p:0.0138458	pcorr:0.0138458	-	#N/A	TRINITY_DN50877_c0_g1_i1
2097973	M:5	F:1	p:0.0140786	pcorr:0.0140786	-	#N/A	TRINITY_DN32237_c0_g1_i1
2097973	M:5	F:1	p:0.0140786	pcorr:0.0140786	-	#N/A	TRINITY_DN32237_c0_g1_i1
2097973	M:5	F:1	p:0.0140786	pcorr:0.0140786	-	#N/A	TRINITY_DN32237_c0_g1_i1
2097973	M:5	F:1	p:0.0140786	pcorr:0.0140786	-	#N/A	TRINITY_DN32237_c0_g1_i1
2097973	M:5	F:1	p:0.0140786	pcorr:0.0140786	-	#N/A	TRINITY_DN32237_c0_g1_i10
2097973	M:5	F:1	p:0.0140786	pcorr:0.0140786	-	#N/A	TRINITY_DN32237_c0_g1_i10
2097973	M:5	F:1	p:0.0140786	pcorr:0.0140786	-	#N/A	TRINITY_DN32237_c0_g1_i10
2097973	M:5	F:1	p:0.0140786	pcorr:0.0140786	-	#N/A	TRINITY_DN32237_c0_g1_i10
2097973	M:5	F:1	p:0.0140786	pcorr:0.0140786	-	#N/A	TRINITY_DN32237_c0_g1_i10
2097973	M:5	F:1	p:0.0140786	pcorr:0.0140786	-	#N/A	TRINITY_DN1806_c0_g2_i2
2097973	M:5	F:1	p:0.0140786	pcorr:0.0140786	-	#N/A	TRINITY_DN1806_c0_g2_i2
2097973	M:5	F:1	p:0.0140786	pcorr:0.0140786	-	#N/A	TRINITY_DN32237_c0_g1_i6
2097973	M:5	F:1	p:0.0140786	pcorr:0.0140786	-	#N/A	TRINITY_DN32237_c0_g1_i6
2097973	M:5	F:1	p:0.0140786	pcorr:0.0140786	-	#N/A	TRINITY_DN32237_c0_g1_i6
2097973	M:5	F:1	p:0.0140786	pcorr:0.0140786	-	#N/A	TRINITY_DN32237_c0_g1_i11
2097973	M:5	F:1	p:0.0140786	pcorr:0.0140786	-	#N/A	TRINITY_DN32237_c0_g1_i11
2098682	M:1	F:10	p:0.0267948	pcorr:0.0267948	NAC1_FELCASodium/calcium exchanger 1 OS=Felis catus OX=9685 GN=SLC8A1 PE=1 SV=1	Choren_v00_mik.OX359197.1G724.1	TRINITY_DN8565_c0_g1_i2
2099967	M:5	F:2	p:0.0439132	pcorr:0.0439132	-	Choren_v00_mik.OX359189.1G1708.1	TRINITY_DN2298_c0_g1_i1
2099967	M:5	F:2	p:0.0439132	pcorr:0.0439132	-	Choren_v00_mik.OX359189.1G1708.1	TRINITY_DN2298_c0_g1_i11
2099967	M:5	F:2	p:0.0439132	pcorr:0.0439132	-	Choren_v00_mik.OX359189.1G1708.1	TRINITY_DN2298_c0_g1_i5
2099967	M:5	F:2	p:0.0439132	pcorr:0.0439132	-	Choren_v00_mik.OX359189.1G1708.1	TRINITY_DN2298_c0_g1_i14
2099967	M:5	F:2	p:0.0439132	pcorr:0.0439132	-	Choren_v00_mik.OX359189.1G1708.1	TRINITY_DN2298_c0_g1_i9
2100196	M:5	F:2	p:0.0439132	pcorr:0.0439132	PESC_NEMVEPescadillo homolog OS=Nematostella vectensis OX=45351 GN=v1g194255 PE=3 SV=1	Choren_v00_mik.OX359189.1G914.1	TRINITY_DN2026_c1_g1_i9
2100196	M:5	F:2	p:0.0439132	pcorr:0.0439132	PESC_NEMVEPescadillo homolog OS=Nematostella vectensis OX=45351 GN=v1g194255 PE=3 SV=1	Choren_v00_mik.OX359189.1G914.1	TRINITY_DN2026_c1_g1_i14
2100196	M:5	F:2	p:0.0439132	pcorr:0.0439132	PESC_NEMVEPescadillo homolog OS=Nematostella vectensis OX=45351 GN=v1g194255 PE=3 SV=1	Choren_v00_mik.OX359189.1G914.1	TRINITY_DN2026_c1_g1_i13
2100196	M:5	F:2	p:0.0439132	pcorr:0.0439132	PESC_NEMVEPescadillo homolog OS=Nematostella vectensis OX=45351 GN=v1g194255 PE=3 SV=1	Choren_v00_mik.OX359189.1G914.1	TRINITY_DN2026_c1_g1_i10
2100196	M:5	F:2	p:0.0439132	pcorr:0.0439132	PESC_NEMVEPescadillo homolog OS=Nematostella vectensis OX=45351 GN=v1g194255 PE=3 SV=1	Choren_v00_mik.OX359189.1G914.1	TRINITY_DN2026_c1_g1_i3
2101052	M:3	F:13	p:0.0138458	pcorr:0.0138458	SOAT1_RATSterol O-acyltransferase 1 OS=Rattus norvegicus OX=10116 GN=Soat1 PE=2 SV=1	Choren_v00_mik.OX359199.1G315.1	TRINITY_DN3083_c0_g1_i10
2101052	M:3	F:13	p:0.0138458	pcorr:0.0138458	SOAT1_MOUSESterol O-acyltransferase 1 OS=Mus musculus OX=10090 GN=Soat1 PE=1 SV=2	Choren_v00_mik.OX359199.1G315.1	TRINITY_DN3083_c0_g1_i7
2102846	M:0	F:11	p:0.00159493	pcorr:0.00159493	-	#N/A	TRINITY_DN2298_c0_g1_i1
2102846	M:0	F:11	p:0.00159493	pcorr:0.00159493	-	#N/A	TRINITY_DN2298_c0_g1_i11
2102846	M:0	F:11	p:0.00159493	pcorr:0.00159493	-	#N/A	TRINITY_DN2298_c0_g1_i5
2102846	M:0	F:11	p:0.00159493	pcorr:0.00159493	-	#N/A	TRINITY_DN2298_c0_g1_i14
2102846	M:0	F:11	p:0.00159493	pcorr:0.00159493	-	#N/A	TRINITY_DN2298_c0_g1_i9
2103687	M:0	F:13	p:6.87148e-05	pcorr:6.87148e-05	PO21_NASVIRetrovirus-related Pol polyprotein from type-1 retrotransposable element R2 (Fragment) OS=Nasonia vitripennis OX=7425 PE=4 SV=2	Choren_v00_mik.OX359194.1G274.1	TRINITY_DN1825_c1_g1_i12
2103687	M:0	F:13	p:6.87148e-05	pcorr:6.87148e-05	PO21_NASVIRetrovirus-related Pol polyprotein from type-1 retrotransposable element R2 (Fragment) OS=Nasonia vitripennis OX=7425 PE=4 SV=2	Choren_v00_mik.OX359194.1G274.1	TRINITY_DN1825_c1_g1_i4
2103687	M:0	F:13	p:6.87148e-05	pcorr:6.87148e-05	PO21_NASVIRetrovirus-related Pol polyprotein from type-1 retrotransposable element R2 (Fragment) OS=Nasonia vitripennis OX=7425 PE=4 SV=2	Choren_v00_mik.OX359194.1G274.1	TRINITY_DN1825_c1_g1_i15
2103687	M:0	F:13	p:6.87148e-05	pcorr:6.87148e-05	PO21_NASVIRetrovirus-related Pol polyprotein from type-1 retrotransposable element R2 (Fragment) OS=Nasonia vitripennis OX=7425 PE=4 SV=2	Choren_v00_mik.OX359194.1G274.1	TRINITY_DN1825_c1_g1_i6
2103687	M:0	F:13	p:6.87148e-05	pcorr:6.87148e-05	-	Choren_v00_mik.OX359194.1G274.1	TRINITY_DN555_c1_g1_i6
2110817	M:6	F:1	p:0.00271931	pcorr:0.00271931	-	Choren_v00_mik.OX359199.1G387.1	TRINITY_DN1759_c0_g1_i16
2110817	M:6	F:1	p:0.00271931	pcorr:0.00271931	-	Choren_v00_mik.OX359199.1G387.1	TRINITY_DN1759_c0_g1_i6
2110817	M:6	F:1	p:0.00271931	pcorr:0.00271931	-	Choren_v00_mik.OX359199.1G387.1	TRINITY_DN1759_c0_g1_i4
2110817	M:6	F:1	p:0.00271931	pcorr:0.00271931	-	Choren_v00_mik.OX359199.1G387.1	TRINITY_DN1759_c0_g1_i5
2110817	M:6	F:1	p:0.00271931	pcorr:0.00271931	-	Choren_v00_mik.OX359199.1G387.1	TRINITY_DN1759_c0_g1_i17
2111004	M:1	F:13	p:0.000504657	pcorr:0.000504657	-	#N/A	TRINITY_DN69449_c0_g2_i3
2111004	M:1	F:13	p:0.000504657	pcorr:0.000504657	-	#N/A	TRINITY_DN69449_c0_g2_i1
2111004	M:1	F:13	p:0.000504657	pcorr:0.000504657	-	#N/A	TRINITY_DN69449_c0_g2_i5
2111004	M:1	F:13	p:0.000504657	pcorr:0.000504657	-	#N/A	TRINITY_DN69449_c0_g2_i6
2111004	M:1	F:13	p:0.000504657	pcorr:0.000504657	GDT2_DICDIProbable serine/threonine-protein kinase gdt2 OS=Dictyostelium discoideum OX=44689 GN=gdt2 PE=2 SV=1	#N/A	TRINITY_DN1304_c1_g1_i12
2111304	M:6	F:3	p:0.0267948	pcorr:0.0267948	FMT_HUMANMethionyl-tRNA formyltransferase, mitochondrial OS=Homo sapiens OX=9606 GN=MTFMT PE=1 SV=2	Choren_v00_mik.OX359199.1G851.1	TRINITY_DN1486_c0_g1_i3
2111304	M:6	F:3	p:0.0267948	pcorr:0.0267948	FMT_HUMANMethionyl-tRNA formyltransferase, mitochondrial OS=Homo sapiens OX=9606 GN=MTFMT PE=1 SV=2	Choren_v00_mik.OX359199.1G851.1	TRINITY_DN1486_c0_g1_i1
2111304	M:6	F:3	p:0.0267948	pcorr:0.0267948	SUSD2_MOUSESushi domain-containing protein 2 OS=Mus musculus OX=10090 GN=Susd2 PE=1 SV=1	Choren_v00_mik.OX359199.1G851.1	TRINITY_DN1486_c0_g1_i2
2111304	M:6	F:3	p:0.0267948	pcorr:0.0267948	SUSD2_MOUSESushi domain-containing protein 2 OS=Mus musculus OX=10090 GN=Susd2 PE=1 SV=1	Choren_v00_mik.OX359199.1G851.1	TRINITY_DN1486_c0_g1_i6
2111304	M:6	F:3	p:0.0267948	pcorr:0.0267948	FMT_HUMANMethionyl-tRNA formyltransferase, mitochondrial OS=Homo sapiens OX=9606 GN=MTFMT PE=1 SV=2	Choren_v00_mik.OX359199.1G851.1	TRINITY_DN1486_c0_g1_i4
2111354	M:6	F:1	p:0.00271931	pcorr:0.00271931	NCHL1_HUMANNeural cell adhesion molecule L1-like protein OS=Homo sapiens OX=9606 GN=CHL1 PE=1 SV=4	Choren_v00_mik.OX359194.1G1033.1	TRINITY_DN32833_c0_g1_i9
2111354	M:6	F:1	p:0.00271931	pcorr:0.00271931	-	Choren_v00_mik.OX359194.1G1033.1	TRINITY_DN46352_c0_g1_i5
2111354	M:6	F:1	p:0.00271931	pcorr:0.00271931	-	Choren_v00_mik.OX359194.1G1033.1	TRINITY_DN32833_c0_g1_i10
2111354	M:6	F:1	p:0.00271931	pcorr:0.00271931	NCHL1_HUMANNeural cell adhesion molecule L1-like protein OS=Homo sapiens OX=9606 GN=CHL1 PE=1 SV=4	Choren_v00_mik.OX359194.1G1033.1	TRINITY_DN32833_c0_g1_i6
2111354	M:6	F:1	p:0.00271931	pcorr:0.00271931	-	Choren_v00_mik.OX359194.1G1033.1	TRINITY_DN32833_c0_g1_i7
2111617	M:0	F:13	p:6.87148e-05	pcorr:6.87148e-05	-	#N/A	TRINITY_DN78040_c1_g1_i3
2111617	M:0	F:13	p:6.87148e-05	pcorr:6.87148e-05	-	#N/A	TRINITY_DN78040_c1_g1_i2
2111617	M:0	F:13	p:6.87148e-05	pcorr:6.87148e-05	-	#N/A	TRINITY_DN171443_c0_g1_i8
2111617	M:0	F:13	p:6.87148e-05	pcorr:6.87148e-05	-	#N/A	TRINITY_DN171443_c0_g1_i8
2111617	M:0	F:13	p:6.87148e-05	pcorr:6.87148e-05	-	#N/A	TRINITY_DN1829_c2_g1_i14
2111617	M:0	F:13	p:6.87148e-05	pcorr:6.87148e-05	-	#N/A	TRINITY_DN1829_c2_g1_i19
2114717	M:2	F:11	p:0.0439132	pcorr:0.0439132	-	#N/A	TRINITY_DN12048_c0_g2_i11
2114717	M:2	F:11	p:0.0439132	pcorr:0.0439132	-	#N/A	TRINITY_DN12048_c0_g2_i10
2114717	M:2	F:11	p:0.0439132	pcorr:0.0439132	-	#N/A	TRINITY_DN12048_c0_g2_i6
2114717	M:2	F:11	p:0.0439132	pcorr:0.0439132	-	#N/A	TRINITY_DN23848_c0_g2_i9
2114717	M:2	F:11	p:0.0439132	pcorr:0.0439132	-	#N/A	TRINITY_DN23848_c0_g2_i5
2115500	M:5	F:2	p:0.0439132	pcorr:0.0439132	-	Choren_v00_mik.OX359197.1G452.1	TRINITY_DN2447_c0_g1_i12
2115500	M:5	F:2	p:0.0439132	pcorr:0.0439132	-	Choren_v00_mik.OX359197.1G452.1	TRINITY_DN2447_c0_g1_i1
2115500	M:5	F:2	p:0.0439132	pcorr:0.0439132	-	Choren_v00_mik.OX359197.1G452.1	TRINITY_DN2447_c0_g1_i5
2115500	M:5	F:2	p:0.0439132	pcorr:0.0439132	-	Choren_v00_mik.OX359197.1G452.1	TRINITY_DN2447_c0_g1_i8
2115500	M:5	F:2	p:0.0439132	pcorr:0.0439132	-	Choren_v00_mik.OX359197.1G452.1	TRINITY_DN2447_c0_g1_i20
2118135	M:0	F:13	p:6.87148e-05	pcorr:6.87148e-05	-	Choren_v00_mik.OX359190.1G792.1	TRINITY_DN287915_c0_g1_i1
2119477	M:5	F:2	p:0.0439132	pcorr:0.0439132	-	Choren_v00_mik.OX359189.1G671.1	TRINITY_DN2208_c1_g1_i17
2119477	M:5	F:2	p:0.0439132	pcorr:0.0439132	-	Choren_v00_mik.OX359189.1G671.1	TRINITY_DN2208_c1_g1_i9
2119477	M:5	F:2	p:0.0439132	pcorr:0.0439132	-	Choren_v00_mik.OX359189.1G671.1	TRINITY_DN44770_c0_g1_i11
2119477	M:5	F:2	p:0.0439132	pcorr:0.0439132	-	Choren_v00_mik.OX359189.1G671.1	TRINITY_DN44770_c0_g1_i1
2119477	M:5	F:2	p:0.0439132	pcorr:0.0439132	-	Choren_v00_mik.OX359189.1G671.1	TRINITY_DN44770_c0_g1_i4
2120691	M:5	F:2	p:0.0439132	pcorr:0.0439132	-	#N/A	TRINITY_DN7822_c0_g2_i1
2120691	M:5	F:2	p:0.0439132	pcorr:0.0439132	-	#N/A	TRINITY_DN7822_c0_g2_i9
2120691	M:5	F:2	p:0.0439132	pcorr:0.0439132	-	#N/A	TRINITY_DN7822_c0_g2_i6
2120691	M:5	F:2	p:0.0439132	pcorr:0.0439132	-	#N/A	TRINITY_DN7822_c0_g2_i4
2120691	M:5	F:2	p:0.0439132	pcorr:0.0439132	-	#N/A	TRINITY_DN7822_c0_g2_i8
2123126	M:5	F:2	p:0.0439132	pcorr:0.0439132	VP13C_HUMANIntermembrane lipid transfer protein VPS13C OS=Homo sapiens OX=9606 GN=VPS13C PE=1 SV=1	Choren_v00_mik.OX359194.1G997.1	TRINITY_DN1212_c0_g1_i17
2123126	M:5	F:2	p:0.0439132	pcorr:0.0439132	VP13C_HUMANIntermembrane lipid transfer protein VPS13C OS=Homo sapiens OX=9606 GN=VPS13C PE=1 SV=1	Choren_v00_mik.OX359194.1G997.1	TRINITY_DN1212_c0_g1_i9
2123126	M:5	F:2	p:0.0439132	pcorr:0.0439132	VP13C_HUMANIntermembrane lipid transfer protein VPS13C OS=Homo sapiens OX=9606 GN=VPS13C PE=1 SV=1	Choren_v00_mik.OX359194.1G997.1	TRINITY_DN1212_c0_g1_i20
2123126	M:5	F:2	p:0.0439132	pcorr:0.0439132	VP13C_HUMANIntermembrane lipid transfer protein VPS13C OS=Homo sapiens OX=9606 GN=VPS13C PE=1 SV=1	Choren_v00_mik.OX359194.1G997.1	TRINITY_DN1212_c0_g1_i10
2123126	M:5	F:2	p:0.0439132	pcorr:0.0439132	VP13C_HUMANIntermembrane lipid transfer protein VPS13C OS=Homo sapiens OX=9606 GN=VPS13C PE=1 SV=1	Choren_v00_mik.OX359194.1G997.1	TRINITY_DN1212_c0_g1_i3
2123808	M:5	F:2	p:0.0439132	pcorr:0.0439132	-	#N/A	TRINITY_DN304863_c0_g1_i1
2125538	M:4	F:0	p:0.0138458	pcorr:0.0138458	-	#N/A	TRINITY_DN2803_c0_g1_i8
2125538	M:4	F:0	p:0.0138458	pcorr:0.0138458	-	#N/A	TRINITY_DN2803_c0_g1_i9
2125538	M:4	F:0	p:0.0138458	pcorr:0.0138458	UBXN4_MOUSEUBX domain-containing protein 4 OS=Mus musculus OX=10090 GN=Ubxn4 PE=1 SV=1	#N/A	TRINITY_DN2803_c0_g1_i2
2125538	M:4	F:0	p:0.0138458	pcorr:0.0138458	UBXN4_RATUBX domain-containing protein 4 OS=Rattus norvegicus OX=10116 GN=Ubxn4 PE=1 SV=1	#N/A	TRINITY_DN2803_c0_g1_i1
2126171	M:5	F:2	p:0.0439132	pcorr:0.0439132	YH24_CAEELPutative aminopeptidase W07G4.4 OS=Caenorhabditis elegans OX=6239 GN=lap-2 PE=3 SV=1	#N/A	TRINITY_DN447_c0_g1_i8
2126171	M:5	F:2	p:0.0439132	pcorr:0.0439132	ERGI1_HUMANEndoplasmic reticulum-Golgi intermediate compartment protein 1 OS=Homo sapiens OX=9606 GN=ERGIC1 PE=1 SV=1	#N/A	TRINITY_DN447_c0_g1_i26
2126171	M:5	F:2	p:0.0439132	pcorr:0.0439132	YH24_CAEELPutative aminopeptidase W07G4.4 OS=Caenorhabditis elegans OX=6239 GN=lap-2 PE=3 SV=1	#N/A	TRINITY_DN447_c0_g1_i2
2126171	M:5	F:2	p:0.0439132	pcorr:0.0439132	ERGI1_HUMANEndoplasmic reticulum-Golgi intermediate compartment protein 1 OS=Homo sapiens OX=9606 GN=ERGIC1 PE=1 SV=1	#N/A	TRINITY_DN447_c0_g1_i5
2126171	M:5	F:2	p:0.0439132	pcorr:0.0439132	ERGI1_HUMANEndoplasmic reticulum-Golgi intermediate compartment protein 1 OS=Homo sapiens OX=9606 GN=ERGIC1 PE=1 SV=1	#N/A	TRINITY_DN447_c0_g1_i29
2126846	M:5	F:2	p:0.0439132	pcorr:0.0439132	-	#N/A	TRINITY_DN640_c4_g1_i1
2127700	M:0	F:13	p:6.87148e-05	pcorr:6.87148e-05	-	#N/A	TRINITY_DN10333_c1_g1_i1
2127700	M:0	F:13	p:6.87148e-05	pcorr:6.87148e-05	-	#N/A	TRINITY_DN30152_c0_g1_i1
2127700	M:0	F:13	p:6.87148e-05	pcorr:6.87148e-05	-	#N/A	TRINITY_DN30152_c0_g1_i2
2127700	M:0	F:13	p:6.87148e-05	pcorr:6.87148e-05	-	#N/A	TRINITY_DN17346_c0_g2_i1
2127700	M:0	F:13	p:6.87148e-05	pcorr:6.87148e-05	-	#N/A	TRINITY_DN54132_c0_g1_i2
2128380	M:4	F:0	p:0.0138458	pcorr:0.0138458	-	#N/A	TRINITY_DN277129_c0_g1_i1
2129529	M:0	F:8	p:0.0277373	pcorr:0.0277373	EXD2_HUMANExonuclease 3'-5' domain-containing protein 2 OS=Homo sapiens OX=9606 GN=EXD2 PE=1 SV=2	#N/A	TRINITY_DN4819_c0_g1_i18
2129529	M:0	F:8	p:0.0277373	pcorr:0.0277373	EXD2_HUMANExonuclease 3'-5' domain-containing protein 2 OS=Homo sapiens OX=9606 GN=EXD2 PE=1 SV=2	#N/A	TRINITY_DN4819_c0_g1_i11
2134308	M:5	F:1	p:0.0140786	pcorr:0.0140786	RGS3_HUMANRegulator of G-protein signaling 3 OS=Homo sapiens OX=9606 GN=RGS3 PE=1 SV=2	Choren_v00_mik.OX359201.1G42.1	TRINITY_DN6069_c0_g1_i5
2134308	M:5	F:1	p:0.0140786	pcorr:0.0140786	RGS3_HUMANRegulator of G-protein signaling 3 OS=Homo sapiens OX=9606 GN=RGS3 PE=1 SV=2	Choren_v00_mik.OX359201.1G42.1	TRINITY_DN6069_c0_g1_i6
2134308	M:5	F:1	p:0.0140786	pcorr:0.0140786	RGS3_HUMANRegulator of G-protein signaling 3 OS=Homo sapiens OX=9606 GN=RGS3 PE=1 SV=2	Choren_v00_mik.OX359201.1G42.1	TRINITY_DN6069_c0_g1_i15
2134308	M:5	F:1	p:0.0140786	pcorr:0.0140786	RGS3_HUMANRegulator of G-protein signaling 3 OS=Homo sapiens OX=9606 GN=RGS3 PE=1 SV=2	Choren_v00_mik.OX359201.1G42.1	TRINITY_DN6069_c0_g1_i16
2134308	M:5	F:1	p:0.0140786	pcorr:0.0140786	RGS3_HUMANRegulator of G-protein signaling 3 OS=Homo sapiens OX=9606 GN=RGS3 PE=1 SV=2	Choren_v00_mik.OX359201.1G42.1	TRINITY_DN6069_c0_g1_i1
2135754	M:4	F:0	p:0.0138458	pcorr:0.0138458	-	#N/A	TRINITY_DN167_c2_g2_i4
2135754	M:4	F:0	p:0.0138458	pcorr:0.0138458	-	#N/A	TRINITY_DN167_c2_g2_i6
2135754	M:4	F:0	p:0.0138458	pcorr:0.0138458	-	#N/A	TRINITY_DN167_c2_g2_i1
2135754	M:4	F:0	p:0.0138458	pcorr:0.0138458	-	#N/A	TRINITY_DN167_c2_g2_i8
2135754	M:4	F:0	p:0.0138458	pcorr:0.0138458	-	#N/A	TRINITY_DN167_c2_g2_i9
2136759	M:5	F:2	p:0.0439132	pcorr:0.0439132	-	#N/A	TRINITY_DN56926_c0_g2_i2
2137006	M:0	F:11	p:0.00159493	pcorr:0.00159493	PO21_NASVIRetrovirus-related Pol polyprotein from type-1 retrotransposable element R2 (Fragment) OS=Nasonia vitripennis OX=7425 PE=4 SV=2	Choren_v00_mik.OX359196.1G410.1	TRINITY_DN1825_c1_g1_i12
2137006	M:0	F:11	p:0.00159493	pcorr:0.00159493	PO21_NASVIRetrovirus-related Pol polyprotein from type-1 retrotransposable element R2 (Fragment) OS=Nasonia vitripennis OX=7425 PE=4 SV=2	Choren_v00_mik.OX359196.1G410.1	TRINITY_DN1825_c1_g1_i4
2137006	M:0	F:11	p:0.00159493	pcorr:0.00159493	PO21_NASVIRetrovirus-related Pol polyprotein from type-1 retrotransposable element R2 (Fragment) OS=Nasonia vitripennis OX=7425 PE=4 SV=2	Choren_v00_mik.OX359196.1G410.1	TRINITY_DN1825_c1_g1_i15
2137006	M:0	F:11	p:0.00159493	pcorr:0.00159493	PO21_NASVIRetrovirus-related Pol polyprotein from type-1 retrotransposable element R2 (Fragment) OS=Nasonia vitripennis OX=7425 PE=4 SV=2	Choren_v00_mik.OX359196.1G410.1	TRINITY_DN1825_c1_g1_i6
2137006	M:0	F:11	p:0.00159493	pcorr:0.00159493	-	Choren_v00_mik.OX359196.1G410.1	TRINITY_DN10660_c0_g1_i2
2138662	M:1	F:10	p:0.0267948	pcorr:0.0267948	SUCB2_MOUSESuccinate--CoA ligase	#N/A	TRINITY_DN2874_c0_g1_i13
2138662	M:1	F:10	p:0.0267948	pcorr:0.0267948	SUCB2_MOUSESuccinate--CoA ligase	#N/A	TRINITY_DN2874_c0_g1_i6
2138662	M:1	F:10	p:0.0267948	pcorr:0.0267948	SUCB2_MOUSESuccinate--CoA ligase	#N/A	TRINITY_DN2874_c0_g1_i18
2138662	M:1	F:10	p:0.0267948	pcorr:0.0267948	SUCB2_MOUSESuccinate--CoA ligase	#N/A	TRINITY_DN2874_c0_g1_i3
2138662	M:1	F:10	p:0.0267948	pcorr:0.0267948	SUCB2_MOUSESuccinate--CoA ligase	#N/A	TRINITY_DN2874_c0_g1_i3
2138662	M:1	F:10	p:0.0267948	pcorr:0.0267948	SUCB2_MOUSESuccinate--CoA ligase	#N/A	TRINITY_DN2874_c0_g1_i1
2141785	M:3	F:13	p:0.0138458	pcorr:0.0138458	-	#N/A	TRINITY_DN63749_c0_g1_i6
2141785	M:3	F:13	p:0.0138458	pcorr:0.0138458	-	#N/A	TRINITY_DN63749_c0_g1_i3
2141785	M:3	F:13	p:0.0138458	pcorr:0.0138458	-	#N/A	TRINITY_DN63749_c0_g1_i2
2141785	M:3	F:13	p:0.0138458	pcorr:0.0138458	-	#N/A	TRINITY_DN63749_c0_g1_i1
2141785	M:3	F:13	p:0.0138458	pcorr:0.0138458	-	#N/A	TRINITY_DN730_c4_g2_i2
[truncated: 3,491 more rows]

## Sheet: D. Oscarella lobularis
RADSEX_tag	N of M	N of F	p_value	Corrected p_value	BLAST both in genome/transcriptome	Gene_ID	Transcript_ID in trinity transcriptome
868658	F:0	M:3	p:0.0472209	pcorr:0.0472209	-	Osclob_v00_mik.OX382150.1G1727.1	TRINITY_DN52076_c0_g2_i9
868658	F:0	M:3	p:0.0472209	pcorr:0.0472209	-	Osclob_v00_mik.OX382150.1G1727.1	TRINITY_DN52076_c0_g2_i4
868658	F:0	M:3	p:0.0472209	pcorr:0.0472209	-	Osclob_v00_mik.OX382150.1G1727.1	TRINITY_DN52076_c0_g2_i6
868658	F:0	M:3	p:0.0472209	pcorr:0.0472209	-	Osclob_v00_mik.OX382150.1G1727.1	TRINITY_DN52076_c0_g2_i7
868658	F:0	M:3	p:0.0472209	pcorr:0.0472209	-	Osclob_v00_mik.OX382150.1G1727.1	TRINITY_DN148830_c0_g1_i1
907501	F:0	M:3	p:0.0472209	pcorr:0.0472209	-	Osclob_v00_mik.OX382167.1G208.1	TRINITY_DN4516_c0_g1_i6
907501	F:0	M:3	p:0.0472209	pcorr:0.0472209	-	Osclob_v00_mik.OX382167.1G208.1	TRINITY_DN4516_c0_g1_i13
907501	F:0	M:3	p:0.0472209	pcorr:0.0472209	-	Osclob_v00_mik.OX382167.1G208.1	TRINITY_DN4516_c0_g1_i5
907501	F:0	M:3	p:0.0472209	pcorr:0.0472209	-	Osclob_v00_mik.OX382167.1G208.1	TRINITY_DN4516_c0_g1_i9
907501	F:0	M:3	p:0.0472209	pcorr:0.0472209	-	Osclob_v00_mik.OX382167.1G208.1	TRINITY_DN4516_c0_g1_i3
922794	F:0	M:3	p:0.0472209	pcorr:0.0472209	RAB7L_RATRas-related protein Rab-7L1 OS=Rattus norvegicus OX=10116 GN=Rab29 PE=1 SV=1	Osclob_v00_mik.OX382153.1G308.1	TRINITY_DN1923_c0_g1_i37
922794	F:0	M:3	p:0.0472209	pcorr:0.0472209	RAB7L_RATRas-related protein Rab-7L1 OS=Rattus norvegicus OX=10116 GN=Rab29 PE=1 SV=1	Osclob_v00_mik.OX382153.1G308.1	TRINITY_DN1923_c0_g1_i20
922794	F:0	M:3	p:0.0472209	pcorr:0.0472209	LRRK1_HUMANLeucine-rich repeat serine/threonine-protein kinase 1 OS=Homo sapiens OX=9606 GN=LRRK1 PE=1 SV=3	Osclob_v00_mik.OX382153.1G301.1	TRINITY_DN1923_c0_g1_i31
922794	F:0	M:3	p:0.0472209	pcorr:0.0472209	LRRK1_HUMANLeucine-rich repeat serine/threonine-protein kinase 1 OS=Homo sapiens OX=9606 GN=LRRK1 PE=1 SV=3	Osclob_v00_mik.OX382153.1G301.1	TRINITY_DN1923_c0_g1_i27
922794	F:0	M:3	p:0.0472209	pcorr:0.0472209	LRRK1_HUMANLeucine-rich repeat serine/threonine-protein kinase 1 OS=Homo sapiens OX=9606 GN=LRRK1 PE=1 SV=3	Osclob_v00_mik.OX382153.1G301.1	TRINITY_DN1923_c0_g1_i35
934883	F:0	M:3	p:0.0472209	pcorr:0.0472209	MTCH2_HUMANMitochondrial carrier homolog 2 OS=Homo sapiens OX=9606 GN=MTCH2 PE=1 SV=1	Osclob_v00_mik.OX382152.1G291.1	TRINITY_DN3166_c0_g1_i15
934883	F:0	M:3	p:0.0472209	pcorr:0.0472209	MTCH2_HUMANMitochondrial carrier homolog 2 OS=Homo sapiens OX=9606 GN=MTCH2 PE=1 SV=1	Osclob_v00_mik.OX382152.1G291.1	TRINITY_DN3166_c0_g1_i13
934883	F:0	M:3	p:0.0472209	pcorr:0.0472209	MTCH2_HUMANMitochondrial carrier homolog 2 OS=Homo sapiens OX=9606 GN=MTCH2 PE=1 SV=1	Osclob_v00_mik.OX382152.1G291.1	TRINITY_DN3166_c0_g1_i4
934883	F:0	M:3	p:0.0472209	pcorr:0.0472209	MTCH2_HUMANMitochondrial carrier homolog 2 OS=Homo sapiens OX=9606 GN=MTCH2 PE=1 SV=1	Osclob_v00_mik.OX382152.1G291.1	TRINITY_DN3166_c0_g1_i12
934883	F:0	M:3	p:0.0472209	pcorr:0.0472209	MTCH2_HUMANMitochondrial carrier homolog 2 OS=Homo sapiens OX=9606 GN=MTCH2 PE=1 SV=1	Osclob_v00_mik.OX382152.1G291.1	TRINITY_DN3166_c0_g1_i14
937793	F:0	M:3	p:0.0472209	pcorr:0.0472209	AGRE5_BOVINAdhesion G protein-coupled receptor E5 OS=Bos taurus OX=9913 GN=ADGRE5 PE=2 SV=1	Osclob_v00_mik.OX382169.1G367.1	TRINITY_DN72_c0_g2_i6
937793	F:0	M:3	p:0.0472209	pcorr:0.0472209	AGRE5_BOVINAdhesion G protein-coupled receptor E5 OS=Bos taurus OX=9913 GN=ADGRE5 PE=2 SV=1	Osclob_v00_mik.OX382169.1G367.1	TRINITY_DN72_c0_g2_i12
937793	F:0	M:3	p:0.0472209	pcorr:0.0472209	AGRE5_BOVINAdhesion G protein-coupled receptor E5 OS=Bos taurus OX=9913 GN=ADGRE5 PE=2 SV=1	Osclob_v00_mik.OX382169.1G367.1	TRINITY_DN72_c0_g2_i4
937793	F:0	M:3	p:0.0472209	pcorr:0.0472209	AGRE5_BOVINAdhesion G protein-coupled receptor E5 OS=Bos taurus OX=9913 GN=ADGRE5 PE=2 SV=1	Osclob_v00_mik.OX382169.1G367.1	TRINITY_DN72_c0_g2_i7
937793	F:0	M:3	p:0.0472209	pcorr:0.0472209	AGRE5_BOVINAdhesion G protein-coupled receptor E5 OS=Bos taurus OX=9913 GN=ADGRE5 PE=2 SV=1	Osclob_v00_mik.OX382169.1G367.1	TRINITY_DN72_c0_g2_i1
987003	F:0	M:3	p:0.0472209	pcorr:0.0472209	FLNB_HUMANFilamin-B OS=Homo sapiens OX=9606 GN=FLNB PE=1 SV=2	Osclob_v00_mik.OX382163.1G461.1	TRINITY_DN329_c0_g2_i6
987003	F:0	M:3	p:0.0472209	pcorr:0.0472209	FLNB_HUMANFilamin-B OS=Homo sapiens OX=9606 GN=FLNB PE=1 SV=2	Osclob_v00_mik.OX382163.1G461.1	TRINITY_DN329_c0_g2_i1
987003	F:0	M:3	p:0.0472209	pcorr:0.0472209	FLNB_HUMANFilamin-B OS=Homo sapiens OX=9606 GN=FLNB PE=1 SV=2	Osclob_v00_mik.OX382163.1G461.1	TRINITY_DN329_c0_g2_i4
987003	F:0	M:3	p:0.0472209	pcorr:0.0472209	FLNB_HUMANFilamin-B OS=Homo sapiens OX=9606 GN=FLNB PE=1 SV=2	Osclob_v00_mik.OX382163.1G461.1	TRINITY_DN329_c0_g2_i5
987003	F:0	M:3	p:0.0472209	pcorr:0.0472209	FLNB_HUMANFilamin-B OS=Homo sapiens OX=9606 GN=FLNB PE=1 SV=2	Osclob_v00_mik.OX382163.1G461.1	TRINITY_DN329_c0_g2_i2
1018960	F:0	M:3	p:0.0472209	pcorr:0.0472209	-	*	TRINITY_DN51962_c0_g1_i7
1018960	F:0	M:3	p:0.0472209	pcorr:0.0472209	-	Osclob_v00_mik.OX382166.1G72.1	TRINITY_DN1320_c1_g1_i7
1018960	F:0	M:3	p:0.0472209	pcorr:0.0472209	-	Osclob_v00_mik.OX382166.1G72.1	TRINITY_DN1320_c1_g1_i6
1018960	F:0	M:3	p:0.0472209	pcorr:0.0472209	-	Osclob_v00_mik.OX382150.1G1740.1	TRINITY_DN29291_c1_g1_i4
1018960	F:0	M:3	p:0.0472209	pcorr:0.0472209	-	Osclob_v00_mik.OX382150.1G849.1	TRINITY_DN1320_c1_g1_i10
1066310	F:0	M:3	p:0.0472209	pcorr:0.0472209	ULK2_HUMANSerine/threonine-protein kinase ULK2 OS=Homo sapiens OX=9606 GN=ULK2 PE=1 SV=3	Osclob_v00_mik.OX382168.1G367.2	TRINITY_DN455_c0_g1_i8
1066310	F:0	M:3	p:0.0472209	pcorr:0.0472209	ULK2_HUMANSerine/threonine-protein kinase ULK2 OS=Homo sapiens OX=9606 GN=ULK2 PE=1 SV=3	Osclob_v00_mik.OX382168.1G367.2	TRINITY_DN455_c0_g1_i12
1066310	F:0	M:3	p:0.0472209	pcorr:0.0472209	ULK2_HUMANSerine/threonine-protein kinase ULK2 OS=Homo sapiens OX=9606 GN=ULK2 PE=1 SV=3	Osclob_v00_mik.OX382168.1G367.2	TRINITY_DN455_c0_g1_i21
1066310	F:0	M:3	p:0.0472209	pcorr:0.0472209	ULK2_HUMANSerine/threonine-protein kinase ULK2 OS=Homo sapiens OX=9606 GN=ULK2 PE=1 SV=3	Osclob_v00_mik.OX382168.1G367.2	TRINITY_DN455_c0_g1_i14
1066310	F:0	M:3	p:0.0472209	pcorr:0.0472209	ULK2_HUMANSerine/threonine-protein kinase ULK2 OS=Homo sapiens OX=9606 GN=ULK2 PE=1 SV=3	Osclob_v00_mik.OX382168.1G367.2	TRINITY_DN455_c0_g1_i1
1085458	F:0	M:3	p:0.0472209	pcorr:0.0472209	MCM8_HUMANDNA helicase MCM8 OS=Homo sapiens OX=9606 GN=MCM8 PE=1 SV=2	Osclob_v00_mik.OX382157.1G80.1	TRINITY_DN18480_c0_g1_i11
1085458	F:0	M:3	p:0.0472209	pcorr:0.0472209	MCM8_HUMANDNA helicase MCM8 OS=Homo sapiens OX=9606 GN=MCM8 PE=1 SV=2	Osclob_v00_mik.OX382157.1G80.1	TRINITY_DN18480_c0_g1_i1
1085458	F:0	M:3	p:0.0472209	pcorr:0.0472209	MCM8_RATDNA helicase MCM8 OS=Rattus norvegicus OX=10116 GN=Mcm8 PE=3 SV=1	Osclob_v00_mik.OX382157.1G80.1	TRINITY_DN18480_c0_g1_i10
1085458	F:0	M:3	p:0.0472209	pcorr:0.0472209	MCM8_HUMANDNA helicase MCM8 OS=Homo sapiens OX=9606 GN=MCM8 PE=1 SV=2	Osclob_v00_mik.OX382157.1G80.1	TRINITY_DN18480_c0_g1_i15
1085458	F:0	M:3	p:0.0472209	pcorr:0.0472209	MCM8_RATDNA helicase MCM8 OS=Rattus norvegicus OX=10116 GN=Mcm8 PE=3 SV=1	Osclob_v00_mik.OX382157.1G80.1	TRINITY_DN18480_c0_g1_i9
1097477	F:0	M:3	p:0.0472209	pcorr:0.0472209	HMCN1_MOUSEHemicentin-1 OS=Mus musculus OX=10090 GN=Hmcn1 PE=1 SV=1	Osclob_v00_mik.OX382153.1G887.1	TRINITY_DN3258_c0_g1_i10
1097477	F:0	M:3	p:0.0472209	pcorr:0.0472209	HMCN1_HUMANHemicentin-1 OS=Homo sapiens OX=9606 GN=HMCN1 PE=1 SV=2	Osclob_v00_mik.OX382153.1G887.1	TRINITY_DN3258_c0_g1_i11
1097477	F:0	M:3	p:0.0472209	pcorr:0.0472209	HMCN1_MOUSEHemicentin-1 OS=Mus musculus OX=10090 GN=Hmcn1 PE=1 SV=1	Osclob_v00_mik.OX382153.1G887.1	TRINITY_DN3258_c0_g1_i9
1097477	F:0	M:3	p:0.0472209	pcorr:0.0472209	HMCN1_MOUSEHemicentin-1 OS=Mus musculus OX=10090 GN=Hmcn1 PE=1 SV=1	Osclob_v00_mik.OX382153.1G887.1	TRINITY_DN3258_c0_g1_i5
1097477	F:0	M:3	p:0.0472209	pcorr:0.0472209	HMCN1_MOUSEHemicentin-1 OS=Mus musculus OX=10090 GN=Hmcn1 PE=1 SV=1	Osclob_v00_mik.OX382153.1G887.1	TRINITY_DN3258_c0_g1_i6
1112068	F:0	M:3	p:0.0472209	pcorr:0.0472209	-	Osclob_v00_mik.OX382158.1G402.1	TRINITY_DN48404_c0_g1_i3
1120309	F:0	M:3	p:0.0472209	pcorr:0.0472209	-	Osclob_v00_mik.OX382165.1G123.1	TRINITY_DN13453_c0_g1_i3
1120309	F:0	M:3	p:0.0472209	pcorr:0.0472209	-	Osclob_v00_mik.OX382165.1G123.1	TRINITY_DN13453_c0_g1_i8
1120309	F:0	M:3	p:0.0472209	pcorr:0.0472209	-	Osclob_v00_mik.OX382165.1G123.1	TRINITY_DN13453_c0_g1_i4
1122026	F:0	M:3	p:0.0472209	pcorr:0.0472209	-	*	TRINITY_DN128752_c0_g1_i4
1122026	F:0	M:3	p:0.0472209	pcorr:0.0472209	-	*	TRINITY_DN45779_c0_g1_i6
1122026	F:0	M:3	p:0.0472209	pcorr:0.0472209	-	*	TRINITY_DN45779_c0_g1_i8
1122026	F:0	M:3	p:0.0472209	pcorr:0.0472209	-	*	TRINITY_DN5707_c1_g1_i5
1122026	F:0	M:3	p:0.0472209	pcorr:0.0472209	GPTC4_BOVING patch domain-containing protein 4 OS=Bos taurus OX=9913 GN=GPATCH4 PE=2 SV=1	Osclob_v00_mik.OX382163.1G489.1	TRINITY_DN5707_c1_g1_i6
1192200	F:0	M:3	p:0.0472209	pcorr:0.0472209	-	Osclob_v00_mik.OX382154.1G556.2	TRINITY_DN18869_c0_g1_i5
1192200	F:0	M:3	p:0.0472209	pcorr:0.0472209	-	*	TRINITY_DN18869_c0_g1_i2
1192200	F:0	M:3	p:0.0472209	pcorr:0.0472209	-	*	TRINITY_DN18869_c0_g1_i4
1237725	F:0	M:3	p:0.0472209	pcorr:0.0472209	-	Osclob_v00_mik.OX382164.1G520.1	TRINITY_DN6729_c0_g1_i9
1237725	F:0	M:3	p:0.0472209	pcorr:0.0472209	-	Osclob_v00_mik.OX382164.1G520.1	TRINITY_DN6729_c0_g1_i1
1237725	F:0	M:3	p:0.0472209	pcorr:0.0472209	CHM4C_DANRECharged multivesicular body protein 4c OS=Danio rerio OX=7955 GN=chmp4c PE=2 SV=1	Osclob_v00_mik.OX382164.1G520.1	TRINITY_DN6729_c0_g1_i2
1237725	F:0	M:3	p:0.0472209	pcorr:0.0472209	CHM4C_DANRECharged multivesicular body protein 4c OS=Danio rerio OX=7955 GN=chmp4c PE=2 SV=1	Osclob_v00_mik.OX382164.1G520.1	TRINITY_DN6729_c0_g1_i4
1237725	F:0	M:3	p:0.0472209	pcorr:0.0472209	-	Osclob_v00_mik.OX382164.1G507.1	TRINITY_DN111166_c0_g1_i1
1246377	F:0	M:3	p:0.0472209	pcorr:0.0472209	-	Osclob_v00_mik.OX382152.1G308.1	TRINITY_DN6193_c0_g1_i3
1246377	F:0	M:3	p:0.0472209	pcorr:0.0472209	-	Osclob_v00_mik.OX382152.1G308.1	TRINITY_DN6193_c0_g1_i13
1246377	F:0	M:3	p:0.0472209	pcorr:0.0472209	-	Osclob_v00_mik.OX382152.1G308.1	TRINITY_DN10230_c0_g1_i4
1246377	F:0	M:3	p:0.0472209	pcorr:0.0472209	-	Osclob_v00_mik.OX382152.1G308.1	TRINITY_DN10230_c0_g1_i2
1252182	F:0	M:3	p:0.0472209	pcorr:0.0472209	-	Osclob_v00_mik.OX382151.1G663.1	TRINITY_DN2669_c4_g1_i4
1252182	F:0	M:3	p:0.0472209	pcorr:0.0472209	-	Osclob_v00_mik.OX382151.1G663.1	TRINITY_DN2669_c4_g1_i3
1252182	F:0	M:3	p:0.0472209	pcorr:0.0472209	-	Osclob_v00_mik.OX382151.1G663.1	TRINITY_DN2669_c4_g1_i5
1252182	F:0	M:3	p:0.0472209	pcorr:0.0472209	-	Osclob_v00_mik.OX382151.1G663.1	TRINITY_DN2669_c4_g1_i7
1252182	F:0	M:3	p:0.0472209	pcorr:0.0472209	-	Osclob_v00_mik.OX382151.1G663.1	TRINITY_DN2669_c4_g1_i2
1256544	F:0	M:3	p:0.0472209	pcorr:0.0472209	NMP1B_XENLANuclear envelope integral membrane protein 1b OS=Xenopus laevis OX=8355 GN=nemp1b PE=1 SV=1	Osclob_v00_mik.OX382161.1G540.1	TRINITY_DN2166_c0_g2_i12
1256544	F:0	M:3	p:0.0472209	pcorr:0.0472209	NMP1B_XENLANuclear envelope integral membrane protein 1b OS=Xenopus laevis OX=8355 GN=nemp1b PE=1 SV=1	Osclob_v00_mik.OX382161.1G540.1	TRINITY_DN2166_c0_g2_i8
1256544	F:0	M:3	p:0.0472209	pcorr:0.0472209	NMP1B_XENLANuclear envelope integral membrane protein 1b OS=Xenopus laevis OX=8355 GN=nemp1b PE=1 SV=1	Osclob_v00_mik.OX382161.1G540.1	TRINITY_DN2166_c0_g2_i11
1256544	F:0	M:3	p:0.0472209	pcorr:0.0472209	-	Osclob_v00_mik.OX382161.1G541.1	TRINITY_DN2166_c0_g2_i13
1256544	F:0	M:3	p:0.0472209	pcorr:0.0472209	NEMP1_XENTRNuclear envelope integral membrane protein 1 OS=Xenopus tropicalis OX=8364 GN=nemp1 PE=2 SV=1	Osclob_v00_mik.OX382161.1G540.1	TRINITY_DN2166_c0_g2_i5
1306546	F:0	M:3	p:0.0472209	pcorr:0.0472209	-	Osclob_v00_mik.OX382161.1G223.1	TRINITY_DN6145_c0_g1_i1
1306546	F:0	M:3	p:0.0472209	pcorr:0.0472209	-	Osclob_v00_mik.OX382161.1G223.1	TRINITY_DN6145_c0_g1_i3
1312568	F:0	M:3	p:0.0472209	pcorr:0.0472209	UFO_HUMANTyrosine-protein kinase receptor UFO OS=Homo sapiens OX=9606 GN=AXL PE=1 SV=4	Osclob_v00_mik.OX382168.1G313.1	TRINITY_DN4934_c0_g1_i27
1312568	F:0	M:3	p:0.0472209	pcorr:0.0472209	UFO_HUMANTyrosine-protein kinase receptor UFO OS=Homo sapiens OX=9606 GN=AXL PE=1 SV=4	Osclob_v00_mik.OX382168.1G313.1	TRINITY_DN4934_c0_g1_i16
1312568	F:0	M:3	p:0.0472209	pcorr:0.0472209	UFO_HUMANTyrosine-protein kinase receptor UFO OS=Homo sapiens OX=9606 GN=AXL PE=1 SV=4	Osclob_v00_mik.OX382168.1G313.1	TRINITY_DN4934_c0_g1_i8
1312568	F:0	M:3	p:0.0472209	pcorr:0.0472209	UFO_HUMANTyrosine-protein kinase receptor UFO OS=Homo sapiens OX=9606 GN=AXL PE=1 SV=4	Osclob_v00_mik.OX382168.1G313.1	TRINITY_DN4934_c0_g1_i19
1312568	F:0	M:3	p:0.0472209	pcorr:0.0472209	UFO_HUMANTyrosine-protein kinase receptor UFO OS=Homo sapiens OX=9606 GN=AXL PE=1 SV=4	Osclob_v00_mik.OX382168.1G313.1	TRINITY_DN4934_c0_g1_i25
1340293	F:0	M:3	p:0.0472209	pcorr:0.0472209	-	Osclob_v00_mik.OX382150.1G1893.1	TRINITY_DN13539_c0_g1_i3
1340293	F:0	M:3	p:0.0472209	pcorr:0.0472209	-	Osclob_v00_mik.OX382150.1G1900.1	TRINITY_DN13539_c0_g1_i1
1340293	F:0	M:3	p:0.0472209	pcorr:0.0472209	-	Osclob_v00_mik.OX382150.1G1893.1	TRINITY_DN13539_c0_g1_i13
1340293	F:0	M:3	p:0.0472209	pcorr:0.0472209	-	Osclob_v00_mik.OX382150.1G1893.1	TRINITY_DN13539_c0_g1_i17
1340293	F:0	M:3	p:0.0472209	pcorr:0.0472209	-	Osclob_v00_mik.OX382150.1G1893.1	TRINITY_DN13539_c0_g1_i9
1358175	F:0	M:3	p:0.0472209	pcorr:0.0472209	-	Osclob_v00_mik.OX382162.1G568.1	TRINITY_DN31969_c0_g1_i1
1358175	F:0	M:3	p:0.0472209	pcorr:0.0472209	OXSR1_PONABSerine/threonine-protein kinase OSR1 OS=Pongo abelii OX=9601 GN=OXSR1 PE=2 SV=1	Osclob_v00_mik.OX382162.1G568.1	TRINITY_DN566_c0_g1_i5
1358175	F:0	M:3	p:0.0472209	pcorr:0.0472209	OXSR1_PONABSerine/threonine-protein kinase OSR1 OS=Pongo abelii OX=9601 GN=OXSR1 PE=2 SV=1	Osclob_v00_mik.OX382162.1G569.1	TRINITY_DN566_c0_g1_i1
1358175	F:0	M:3	p:0.0472209	pcorr:0.0472209	OXSR1_PONABSerine/threonine-protein kinase OSR1 OS=Pongo abelii OX=9601 GN=OXSR1 PE=2 SV=1	Osclob_v00_mik.OX382162.1G568.1	TRINITY_DN566_c0_g1_i3
1358175	F:0	M:3	p:0.0472209	pcorr:0.0472209	M3K20_HUMANMitogen-activated protein kinase kinase kinase 20 OS=Homo sapiens OX=9606 GN=MAP3K20 PE=1 SV=3	Osclob_v00_mik.OX382162.1G568.1	TRINITY_DN566_c0_g1_i6
1376246	F:0	M:3	p:0.0472209	pcorr:0.0472209	MK07_BOVINMitogen-activated protein kinase 7 OS=Bos taurus OX=9913 GN=MAPK7 PE=2 SV=1	Osclob_v00_mik.OX382154.1G349.1	TRINITY_DN1504_c0_g1_i1
1376246	F:0	M:3	p:0.0472209	pcorr:0.0472209	MK07_BOVINMitogen-activated protein kinase 7 OS=Bos taurus OX=9913 GN=MAPK7 PE=2 SV=1	Osclob_v00_mik.OX382154.1G348.1	TRINITY_DN1504_c0_g1_i2
1376246	F:0	M:3	p:0.0472209	pcorr:0.0472209	ABCC9_RATATP-binding cassette sub-family C member 9 OS=Rattus norvegicus OX=10116 GN=Abcc9 PE=1 SV=1	Osclob_v00_mik.OX382154.1G349.1	TRINITY_DN1504_c0_g1_i8
1376246	F:0	M:3	p:0.0472209	pcorr:0.0472209	ABCC9_RATATP-binding cassette sub-family C member 9 OS=Rattus norvegicus OX=10116 GN=Abcc9 PE=1 SV=1	Osclob_v00_mik.OX382154.1G349.1	TRINITY_DN1504_c0_g1_i7
1376246	F:0	M:3	p:0.0472209	pcorr:0.0472209	ABCC9_RATATP-binding cassette sub-family C member 9 OS=Rattus norvegicus OX=10116 GN=Abcc9 PE=1 SV=1	Osclob_v00_mik.OX382154.1G349.1	TRINITY_DN1504_c0_g1_i16
1390985	F:0	M:3	p:0.0472209	pcorr:0.0472209	LZIC_MOUSEProtein LZIC OS=Mus musculus OX=10090 GN=Lzic PE=1 SV=1	Osclob_v00_mik.OX382165.1G456.1	TRINITY_DN1993_c0_g1_i9
1390985	F:0	M:3	p:0.0472209	pcorr:0.0472209	LZIC_MOUSEProtein LZIC OS=Mus musculus OX=10090 GN=Lzic PE=1 SV=1	Osclob_v00_mik.OX382165.1G456.1	TRINITY_DN1993_c0_g1_i1
1390985	F:0	M:3	p:0.0472209	pcorr:0.0472209	LZIC_MOUSEProtein LZIC OS=Mus musculus OX=10090 GN=Lzic PE=1 SV=1	Osclob_v00_mik.OX382165.1G456.1	TRINITY_DN1993_c0_g1_i5
1390985	F:0	M:3	p:0.0472209	pcorr:0.0472209	LZIC_MOUSEProtein LZIC OS=Mus musculus OX=10090 GN=Lzic PE=1 SV=1	Osclob_v00_mik.OX382165.1G456.1	TRINITY_DN1993_c0_g1_i6
1390985	F:0	M:3	p:0.0472209	pcorr:0.0472209	LZIC_MOUSEProtein LZIC OS=Mus musculus OX=10090 GN=Lzic PE=1 SV=1	Osclob_v00_mik.OX382165.1G456.1	TRINITY_DN1993_c0_g1_i7
1440734	F:0	M:3	p:0.0472209	pcorr:0.0472209	-	Osclob_v00_mik.OX382166.1G510.1	TRINITY_DN2805_c0_g1_i1
1440734	F:0	M:3	p:0.0472209	pcorr:0.0472209	-	Osclob_v00_mik.OX382166.1G510.1	TRINITY_DN2805_c0_g1_i6
1440734	F:0	M:3	p:0.0472209	pcorr:0.0472209	-	Osclob_v00_mik.OX382166.1G510.1	TRINITY_DN2805_c0_g1_i3
1440734	F:0	M:3	p:0.0472209	pcorr:0.0472209	-	Osclob_v00_mik.OX382166.1G510.1	TRINITY_DN1622_c0_g1_i7
1440734	F:0	M:3	p:0.0472209	pcorr:0.0472209	-	Osclob_v00_mik.OX382166.1G510.1	TRINITY_DN1622_c0_g1_i9
1464935	F:0	M:3	p:0.0472209	pcorr:0.0472209	ZNFX1_HUMANNFX1-type zinc finger-containing protein 1 OS=Homo sapiens OX=9606 GN=ZNFX1 PE=1 SV=2	Osclob_v00_mik.OX382164.1G258.1	TRINITY_DN992_c1_g1_i6
1464935	F:0	M:3	p:0.0472209	pcorr:0.0472209	ZNFX1_HUMANNFX1-type zinc finger-containing protein 1 OS=Homo sapiens OX=9606 GN=ZNFX1 PE=1 SV=2	Osclob_v00_mik.OX382164.1G258.1	TRINITY_DN992_c1_g1_i4
1464935	F:0	M:3	p:0.0472209	pcorr:0.0472209	ZNFX1_HUMANNFX1-type zinc finger-containing protein 1 OS=Homo sapiens OX=9606 GN=ZNFX1 PE=1 SV=2	Osclob_v00_mik.OX382164.1G258.1	TRINITY_DN992_c1_g1_i5
1464935	F:0	M:3	p:0.0472209	pcorr:0.0472209	ZNFX1_MOUSENFX1-type zinc finger-containing protein 1 OS=Mus musculus OX=10090 GN=Znfx1 PE=1 SV=3	Osclob_v00_mik.OX382164.1G258.1	TRINITY_DN992_c1_g1_i1
1469010	F:0	M:3	p:0.0472209	pcorr:0.0472209	MX2_ONCMYInterferon-induced GTP-binding protein Mx2 OS=Oncorhynchus mykiss OX=8022 GN=mx2 PE=2 SV=1	Osclob_v00_mik.OX382159.1G57.1	TRINITY_DN793_c0_g1_i8
1469010	F:0	M:3	p:0.0472209	pcorr:0.0472209	MX2_ONCMYInterferon-induced GTP-binding protein Mx2 OS=Oncorhynchus mykiss OX=8022 GN=mx2 PE=2 SV=1	Osclob_v00_mik.OX382159.1G57.1	TRINITY_DN793_c0_g1_i3
1469010	F:0	M:3	p:0.0472209	pcorr:0.0472209	MX2_ONCMYInterferon-induced GTP-binding protein Mx2 OS=Oncorhynchus mykiss OX=8022 GN=mx2 PE=2 SV=1	Osclob_v00_mik.OX382159.1G57.1	TRINITY_DN793_c0_g1_i11
1469010	F:0	M:3	p:0.0472209	pcorr:0.0472209	MX2_ONCMYInterferon-induced GTP-binding protein Mx2 OS=Oncorhynchus mykiss OX=8022 GN=mx2 PE=2 SV=1	Osclob_v00_mik.OX382159.1G57.1	TRINITY_DN793_c0_g1_i2
1469010	F:0	M:3	p:0.0472209	pcorr:0.0472209	MX2_ONCMYInterferon-induced GTP-binding protein Mx2 OS=Oncorhynchus mykiss OX=8022 GN=mx2 PE=2 SV=1	Osclob_v00_mik.OX382159.1G57.1	TRINITY_DN793_c0_g1_i7
1484706	F:0	M:3	p:0.0472209	pcorr:0.0472209	-	*	TRINITY_DN102951_c0_g1_i2
1484706	F:0	M:3	p:0.0472209	pcorr:0.0472209	-	*	TRINITY_DN102951_c0_g1_i3
1484706	F:0	M:3	p:0.0472209	pcorr:0.0472209	-	*	TRINITY_DN102951_c0_g1_i1
1489826	F:0	M:3	p:0.0472209	pcorr:0.0472209	FXL19_MOUSEF-box/LRR-repeat protein 19 OS=Mus musculus OX=10090 GN=Fbxl19 PE=2 SV=1	Osclob_v00_mik.OX382164.1G382.1	TRINITY_DN4396_c0_g1_i9
1489826	F:0	M:3	p:0.0472209	pcorr:0.0472209	-	Osclob_v00_mik.OX382155.1G246.1	TRINITY_DN33389_c0_g1_i2
1503176	F:0	M:3	p:0.0472209	pcorr:0.0472209	-	Osclob_v00_mik.OX382152.1G293.1	TRINITY_DN11859_c1_g1_i11
1519647	F:0	M:3	p:0.0472209	pcorr:0.0472209	-	*	TRINITY_DN23730_c0_g2_i9
1519647	F:0	M:3	p:0.0472209	pcorr:0.0472209	-	*	TRINITY_DN23730_c0_g2_i19
1519647	F:0	M:3	p:0.0472209	pcorr:0.0472209	-	*	TRINITY_DN23730_c0_g2_i12
1520946	F:0	M:3	p:0.0472209	pcorr:0.0472209	RIPK1_MOUSEReceptor-interacting serine/threonine-protein kinase 1 OS=Mus musculus OX=10090 GN=Ripk1 PE=1 SV=1	Osclob_v00_mik.OX382158.1G629.1	TRINITY_DN5954_c0_g1_i4
1520946	F:0	M:3	p:0.0472209	pcorr:0.0472209	RIPK1_MOUSEReceptor-interacting serine/threonine-protein kinase 1 OS=Mus musculus OX=10090 GN=Ripk1 PE=1 SV=1	Osclob_v00_mik.OX382158.1G629.1	TRINITY_DN5954_c0_g1_i7
1520946	F:0	M:3	p:0.0472209	pcorr:0.0472209	RIPK1_MOUSEReceptor-interacting serine/threonine-protein kinase 1 OS=Mus musculus OX=10090 GN=Ripk1 PE=1 SV=1	Osclob_v00_mik.OX382158.1G629.1	TRINITY_DN5954_c0_g1_i6
1520946	F:0	M:3	p:0.0472209	pcorr:0.0472209	RIPK1_MOUSEReceptor-interacting serine/threonine-protein kinase 1 OS=Mus musculus OX=10090 GN=Ripk1 PE=1 SV=1	Osclob_v00_mik.OX382158.1G629.1	TRINITY_DN5954_c0_g1_i3
1544187	F:0	M:3	p:0.0472209	pcorr:0.0472209	SGF29_RATSAGA-associated factor 29 OS=Rattus norvegicus OX=10116 GN=Sgf29 PE=1 SV=1	Osclob_v00_mik.OX382154.1G444.1	TRINITY_DN3534_c1_g1_i13
1544187	F:0	M:3	p:0.0472209	pcorr:0.0472209	TRM11_RATtRNA (guanine(10)-N2)-methyltransferase homolog OS=Rattus norvegicus OX=10116 GN=Trmt11 PE=2 SV=1	Osclob_v00_mik.OX382167.1G327.1	TRINITY_DN3534_c1_g1_i14
1544187	F:0	M:3	p:0.0472209	pcorr:0.0472209	TRM11_RATtRNA (guanine(10)-N2)-methyltransferase homolog OS=Rattus norvegicus OX=10116 GN=Trmt11 PE=2 SV=1	Osclob_v00_mik.OX382167.1G327.1	TRINITY_DN3534_c1_g1_i16
1544187	F:0	M:3	p:0.0472209	pcorr:0.0472209	SGF29_RATSAGA-associated factor 29 OS=Rattus norvegicus OX=10116 GN=Sgf29 PE=1 SV=1	Osclob_v00_mik.OX382154.1G444.1	TRINITY_DN3534_c1_g1_i20
1544187	F:0	M:3	p:0.0472209	pcorr:0.0472209	SGF29_RATSAGA-associated factor 29 OS=Rattus norvegicus OX=10116 GN=Sgf29 PE=1 SV=1	Osclob_v00_mik.OX382155.1G127.2	TRINITY_DN3534_c1_g1_i21
1548224	F:0	M:3	p:0.0472209	pcorr:0.0472209	-	*	TRINITY_DN22113_c0_g1_i1
1548224	F:0	M:3	p:0.0472209	pcorr:0.0472209	-	*	TRINITY_DN22113_c0_g1_i1
1548224	F:0	M:3	p:0.0472209	pcorr:0.0472209	-	*	TRINITY_DN3884_c1_g3_i2
1548224	F:0	M:3	p:0.0472209	pcorr:0.0472209	-	*	TRINITY_DN3884_c1_g3_i1
1548224	F:0	M:3	p:0.0472209	pcorr:0.0472209	FGFR2_MOUSEFibroblast growth factor receptor 2 OS=Mus musculus OX=10090 GN=Fgfr2 PE=1 SV=4	Osclob_v00_mik.OX382158.1G181.1	TRINITY_DN3884_c1_g2_i1
1549442	F:0	M:3	p:0.0472209	pcorr:0.0472209	GTPB2_MOUSEGTP-binding protein 2 OS=Mus musculus OX=10090 GN=Gtpbp2 PE=1 SV=1	Osclob_v00_mik.OX382156.1G613.1	TRINITY_DN6971_c0_g1_i2
1549442	F:0	M:3	p:0.0472209	pcorr:0.0472209	GTPB2_MOUSEGTP-binding protein 2 OS=Mus musculus OX=10090 GN=Gtpbp2 PE=1 SV=1	Osclob_v00_mik.OX382156.1G613.1	TRINITY_DN6971_c0_g1_i6
1549442	F:0	M:3	p:0.0472209	pcorr:0.0472209	GTPB2_MOUSEGTP-binding protein 2 OS=Mus musculus OX=10090 GN=Gtpbp2 PE=1 SV=1	Osclob_v00_mik.OX382156.1G613.1	TRINITY_DN6971_c0_g1_i12
1549442	F:0	M:3	p:0.0472209	pcorr:0.0472209	GTPB2_MOUSEGTP-binding protein 2 OS=Mus musculus OX=10090 GN=Gtpbp2 PE=1 SV=1	Osclob_v00_mik.OX382156.1G613.1	TRINITY_DN6971_c0_g1_i10
1549442	F:0	M:3	p:0.0472209	pcorr:0.0472209	GTPB2_MOUSEGTP-binding protein 2 OS=Mus musculus OX=10090 GN=Gtpbp2 PE=1 SV=1	Osclob_v00_mik.OX382156.1G613.1	TRINITY_DN6971_c0_g1_i7
1553753	F:0	M:3	p:0.0472209	pcorr:0.0472209	CAD23_HUMANCadherin-23 OS=Homo sapiens OX=9606 GN=CDH23 PE=1 SV=2	Osclob_v00_mik.OX382160.1G346.1	TRINITY_DN9305_c0_g1_i3
1553753	F:0	M:3	p:0.0472209	pcorr:0.0472209	FAT2_DROMEFat-like cadherin-related tumor suppressor homolog OS=Drosophila melanogaster OX=7227 GN=kug PE=2 SV=3	Osclob_v00_mik.OX382160.1G346.1	TRINITY_DN9305_c0_g1_i5
1556307	F:0	M:3	p:0.0472209	pcorr:0.0472209	MDN1_HUMANMidasin OS=Homo sapiens OX=9606 GN=MDN1 PE=1 SV=2	Osclob_v00_mik.OX382168.1G184.1	TRINITY_DN950_c0_g2_i1
1556307	F:0	M:3	p:0.0472209	pcorr:0.0472209	MDN1_HUMANMidasin OS=Homo sapiens OX=9606 GN=MDN1 PE=1 SV=2	Osclob_v00_mik.OX382168.1G131.1	TRINITY_DN950_c0_g1_i1
1556307	F:0	M:3	p:0.0472209	pcorr:0.0472209	MDN1_HUMANMidasin OS=Homo sapiens OX=9606 GN=MDN1 PE=1 SV=2	Osclob_v00_mik.OX382168.1G131.1	TRINITY_DN950_c0_g1_i13
1556307	F:0	M:3	p:0.0472209	pcorr:0.0472209	-	Osclob_v00_mik.OX382168.1G132.1	TRINITY_DN27325_c0_g2_i2
1556307	F:0	M:3	p:0.0472209	pcorr:0.0472209	-	Osclob_v00_mik.OX382168.1G132.1	TRINITY_DN27325_c0_g2_i1
1562516	F:0	M:3	p:0.0472209	pcorr:0.0472209	-	Osclob_v00_mik.OX382150.1G1727.1	TRINITY_DN52076_c0_g2_i9
1562516	F:0	M:3	p:0.0472209	pcorr:0.0472209	-	Osclob_v00_mik.OX382150.1G1727.1	TRINITY_DN52076_c0_g2_i4
1562516	F:0	M:3	p:0.0472209	pcorr:0.0472209	-	Osclob_v00_mik.OX382150.1G1727.1	TRINITY_DN52076_c0_g2_i7
1562516	F:0	M:3	p:0.0472209	pcorr:0.0472209	-	Osclob_v00_mik.OX382150.1G1727.1	TRINITY_DN52076_c0_g2_i6
1562516	F:0	M:3	p:0.0472209	pcorr:0.0472209	-	Osclob_v00_mik.OX382150.1G1727.1	TRINITY_DN2912_c0_g1_i3
1565865	F:0	M:3	p:0.0472209	pcorr:0.0472209	CAD23_HUMANCadherin-23 OS=Homo sapiens OX=9606 GN=CDH23 PE=1 SV=2	Osclob_v00_mik.OX382160.1G346.1	TRINITY_DN9305_c0_g1_i3
1565865	F:0	M:3	p:0.0472209	pcorr:0.0472209	FAT2_DROMEFat-like cadherin-related tumor suppressor homolog OS=Drosophila melanogaster OX=7227 GN=kug PE=2 SV=3	Osclob_v00_mik.OX382160.1G346.1	TRINITY_DN9305_c0_g1_i5
1566647	F:0	M:3	p:0.0472209	pcorr:0.0472209	-	*	TRINITY_DN32949_c0_g1_i6
1566647	F:0	M:3	p:0.0472209	pcorr:0.0472209	-	*	TRINITY_DN32949_c0_g1_i6
1566647	F:0	M:3	p:0.0472209	pcorr:0.0472209	-	*	TRINITY_DN32949_c0_g1_i6
1566647	F:0	M:3	p:0.0472209	pcorr:0.0472209	-	*	TRINITY_DN31614_c0_g1_i2
1566647	F:0	M:3	p:0.0472209	pcorr:0.0472209	-	*	TRINITY_DN31614_c0_g1_i2
1566647	F:0	M:3	p:0.0472209	pcorr:0.0472209	-	*	TRINITY_DN31614_c0_g1_i2
1566647	F:0	M:3	p:0.0472209	pcorr:0.0472209	-	*	TRINITY_DN31614_c0_g1_i1
1566647	F:0	M:3	p:0.0472209	pcorr:0.0472209	-	*	TRINITY_DN31614_c0_g1_i1
1566647	F:0	M:3	p:0.0472209	pcorr:0.0472209	-	Osclob_v00_mik.OX382150.1G309.1	TRINITY_DN15046_c4_g1_i2
1566647	F:0	M:3	p:0.0472209	pcorr:0.0472209	-	Osclob_v00_mik.OX382150.1G309.1	TRINITY_DN15046_c4_g1_i2
1566647	F:0	M:3	p:0.0472209	pcorr:0.0472209	-	Osclob_v00_mik.OX382150.1G309.1	TRINITY_DN15046_c4_g1_i2
1566647	F:0	M:3	p:0.0472209	pcorr:0.0472209	-	*	TRINITY_DN97789_c0_g1_i2
1566647	F:0	M:3	p:0.0472209	pcorr:0.0472209	-	*	TRINITY_DN97789_c0_g1_i2
1567258	F:0	M:3	p:0.0472209	pcorr:0.0472209	-	Osclob_v00_mik.OX382155.1G160.2	TRINITY_DN8441_c0_g1_i1
1567258	F:0	M:3	p:0.0472209	pcorr:0.0472209	-	Osclob_v00_mik.OX382155.1G160.2	TRINITY_DN8441_c0_g1_i8
1567258	F:0	M:3	p:0.0472209	pcorr:0.0472209	-	Osclob_v00_mik.OX382155.1G160.2	TRINITY_DN8441_c0_g1_i9
1567258	F:0	M:3	p:0.0472209	pcorr:0.0472209	-	Osclob_v00_mik.OX382155.1G160.2	TRINITY_DN8441_c0_g1_i10
1567258	F:0	M:3	p:0.0472209	pcorr:0.0472209	-	Osclob_v00_mik.OX382155.1G160.2	TRINITY_DN8441_c0_g1_i6
1569047	F:0	M:3	p:0.0472209	pcorr:0.0472209	TORSO_BOMMOTyrosine-protein kinase receptor torso OS=Bombyx mori OX=7091 GN=tor PE=1 SV=1	Osclob_v00_mik.OX382154.1G791.1	TRINITY_DN20364_c0_g1_i1
1569047	F:0	M:3	p:0.0472209	pcorr:0.0472209	-	Osclob_v00_mik.OX382154.1G744.1	TRINITY_DN20364_c0_g1_i3
1571004	F:0	M:3	p:0.0472209	pcorr:0.0472209	-	*	TRINITY_DN32949_c0_g1_i6
1571004	F:0	M:3	p:0.0472209	pcorr:0.0472209	-	*	TRINITY_DN32949_c0_g1_i6
1571004	F:0	M:3	p:0.0472209	pcorr:0.0472209	-	*	TRINITY_DN32949_c0_g1_i6
1571004	F:0	M:3	p:0.0472209	pcorr:0.0472209	-	*	TRINITY_DN32949_c0_g1_i6
1571004	F:0	M:3	p:0.0472209	pcorr:0.0472209	-	*	TRINITY_DN32949_c0_g1_i6
1571004	F:0	M:3	p:0.0472209	pcorr:0.0472209	-	Osclob_v00_mik.OX382150.1G309.1	TRINITY_DN15046_c4_g1_i2
1571004	F:0	M:3	p:0.0472209	pcorr:0.0472209	-	Osclob_v00_mik.OX382150.1G309.1	TRINITY_DN15046_c4_g1_i2
1571004	F:0	M:3	p:0.0472209	pcorr:0.0472209	-	Osclob_v00_mik.OX382150.1G309.1	TRINITY_DN15046_c4_g1_i2
1571004	F:0	M:3	p:0.0472209	pcorr:0.0472209	-	Osclob_v00_mik.OX382150.1G309.1	TRINITY_DN15046_c4_g1_i2
1571004	F:0	M:3	p:0.0472209	pcorr:0.0472209	-	*	TRINITY_DN31614_c0_g1_i2
1571004	F:0	M:3	p:0.0472209	pcorr:0.0472209	-	*	TRINITY_DN31614_c0_g1_i2
1571004	F:0	M:3	p:0.0472209	pcorr:0.0472209	-	*	TRINITY_DN31614_c0_g1_i2
1571004	F:0	M:3	p:0.0472209	pcorr:0.0472209	-	*	TRINITY_DN31614_c0_g1_i2
1571004	F:0	M:3	p:0.0472209	pcorr:0.0472209	-	*	TRINITY_DN31614_c0_g1_i2
1571004	F:0	M:3	p:0.0472209	pcorr:0.0472209	-	*	TRINITY_DN31614_c0_g1_i2
1571004	F:0	M:3	p:0.0472209	pcorr:0.0472209	-	*	TRINITY_DN31614_c0_g1_i1
1571004	F:0	M:3	p:0.0472209	pcorr:0.0472209	-	*	TRINITY_DN31614_c0_g1_i1
1571004	F:0	M:3	p:0.0472209	pcorr:0.0472209	-	*	TRINITY_DN31614_c0_g1_i1
1571004	F:0	M:3	p:0.0472209	pcorr:0.0472209	-	*	TRINITY_DN31614_c0_g1_i1
1571004	F:0	M:3	p:0.0472209	pcorr:0.0472209	-	*	TRINITY_DN31614_c0_g1_i1
1571004	F:0	M:3	p:0.0472209	pcorr:0.0472209	-	*	TRINITY_DN49153_c0_g1_i2
1571004	F:0	M:3	p:0.0472209	pcorr:0.0472209	-	*	TRINITY_DN49153_c0_g1_i2
1571004	F:0	M:3	p:0.0472209	pcorr:0.0472209	-	*	TRINITY_DN49153_c0_g1_i2
1571004	F:0	M:3	p:0.0472209	pcorr:0.0472209	-	*	TRINITY_DN49153_c0_g1_i2
1571004	F:0	M:3	p:0.0472209	pcorr:0.0472209	-	*	TRINITY_DN49153_c0_g1_i2
1572717	F:0	M:3	p:0.0472209	pcorr:0.0472209	-	Osclob_v00_mik.OX382161.1G226.1	TRINITY_DN9239_c0_g1_i4
1572717	F:0	M:3	p:0.0472209	pcorr:0.0472209	-	Osclob_v00_mik.OX382161.1G226.1	TRINITY_DN9239_c0_g1_i4
1572717	F:0	M:3	p:0.0472209	pcorr:0.0472209	-	Osclob_v00_mik.OX382161.1G226.1	TRINITY_DN9239_c0_g1_i8
1572717	F:0	M:3	p:0.0472209	pcorr:0.0472209	-	Osclob_v00_mik.OX382161.1G226.1	TRINITY_DN9239_c0_g1_i8
1572717	F:0	M:3	p:0.0472209	pcorr:0.0472209	-	Osclob_v00_mik.OX382161.1G226.1	TRINITY_DN9239_c0_g1_i9
1572717	F:0	M:3	p:0.0472209	pcorr:0.0472209	-	Osclob_v00_mik.OX382161.1G226.1	TRINITY_DN9239_c0_g1_i9
1572717	F:0	M:3	p:0.0472209	pcorr:0.0472209	-	Osclob_v00_mik.OX382161.1G226.1	TRINITY_DN9239_c0_g1_i15
1572717	F:0	M:3	p:0.0472209	pcorr:0.0472209	-	Osclob_v00_mik.OX382161.1G226.1	TRINITY_DN9239_c0_g1_i15
1572717	F:0	M:3	p:0.0472209	pcorr:0.0472209	-	Osclob_v00_mik.OX382161.1G226.1	TRINITY_DN9239_c0_g1_i14
1572717	F:0	M:3	p:0.0472209	pcorr:0.0472209	-	Osclob_v00_mik.OX382161.1G226.1	TRINITY_DN9239_c0_g1_i14
1577557	F:0	M:3	p:0.0472209	pcorr:0.0472209	-	Osclob_v00_mik.OX382169.1G433.1	TRINITY_DN76908_c0_g1_i1
1577557	F:0	M:3	p:0.0472209	pcorr:0.0472209	PLXA1_MOUSEPlexin-A1 OS=Mus musculus OX=10090 GN=Plxna1 PE=1 SV=1	Osclob_v00_mik.OX382158.1G182.1	TRINITY_DN8601_c0_g1_i2
1577557	F:0	M:3	p:0.0472209	pcorr:0.0472209	PLXA1_MOUSEPlexin-A1 OS=Mus musculus OX=10090 GN=Plxna1 PE=1 SV=1	Osclob_v00_mik.OX382158.1G182.1	TRINITY_DN8601_c0_g1_i1
1577557	F:0	M:3	p:0.0472209	pcorr:0.0472209	PLXA3_DANREPlexin A3 OS=Danio rerio OX=7955 GN=plxna3 PE=2 SV=2	Osclob_v00_mik.OX382169.1G433.1	TRINITY_DN1442_c0_g1_i11
1577557	F:0	M:3	p:0.0472209	pcorr:0.0472209	PLXA4_DANREPlexin-A4 OS=Danio rerio OX=7955 GN=plxna4 PE=2 SV=1	Osclob_v00_mik.OX382169.1G433.1	TRINITY_DN1442_c0_g1_i12
1578156	F:0	M:3	p:0.0472209	pcorr:0.0472209	-	Osclob_v00_mik.OX382154.1G556.2	TRINITY_DN2129_c0_g1_i17
1578156	F:0	M:3	p:0.0472209	pcorr:0.0472209	BRX1_BOVINRibosome biogenesis protein BRX1 homolog OS=Bos taurus OX=9913 GN=BRIX1 PE=2 SV=1	Osclob_v00_mik.OX382154.1G555.1	TRINITY_DN2129_c0_g1_i4
1578156	F:0	M:3	p:0.0472209	pcorr:0.0472209	BRX1_BOVINRibosome biogenesis protein BRX1 homolog OS=Bos taurus OX=9913 GN=BRIX1 PE=2 SV=1	Osclob_v00_mik.OX382154.1G555.1	TRINITY_DN2129_c0_g1_i9
1578156	F:0	M:3	p:0.0472209	pcorr:0.0472209	-	Osclob_v00_mik.OX382154.1G554.1	TRINITY_DN6881_c0_g1_i5
1582498	F:0	M:3	p:0.0472209	pcorr:0.0472209	-	*	TRINITY_DN45813_c0_g1_i3
1582498	F:0	M:3	p:0.0472209	pcorr:0.0472209	-	*	TRINITY_DN45813_c0_g1_i9
1582498	F:0	M:3	p:0.0472209	pcorr:0.0472209	-	*	TRINITY_DN45813_c0_g1_i4
1582498	F:0	M:3	p:0.0472209	pcorr:0.0472209	-	*	TRINITY_DN45813_c0_g1_i1
1582635	F:0	M:3	p:0.0472209	pcorr:0.0472209	-	*	TRINITY_DN39964_c0_g2_i4
1582635	F:0	M:3	p:0.0472209	pcorr:0.0472209	-	*	TRINITY_DN39964_c0_g1_i1
1582887	F:0	M:3	p:0.0472209	pcorr:0.0472209	AMT2_CAEELPutative ammonium transporter 2 OS=Caenorhabditis elegans OX=6239 GN=amt-2 PE=3 SV=3	Osclob_v00_mik.OX382153.1G511.1	TRINITY_DN3558_c0_g1_i2
1582887	F:0	M:3	p:0.0472209	pcorr:0.0472209	AMT2_CAEELPutative ammonium transporter 2 OS=Caenorhabditis elegans OX=6239 GN=amt-2 PE=3 SV=3	Osclob_v00_mik.OX382153.1G511.1	TRINITY_DN3558_c0_g1_i17
1582887	F:0	M:3	p:0.0472209	pcorr:0.0472209	AMT2_CAEELPutative ammonium transporter 2 OS=Caenorhabditis elegans OX=6239 GN=amt-2 PE=3 SV=3	Osclob_v00_mik.OX382153.1G511.1	TRINITY_DN3558_c0_g1_i11
1582887	F:0	M:3	p:0.0472209	pcorr:0.0472209	AMT2_CAEELPutative ammonium transporter 2 OS=Caenorhabditis elegans OX=6239 GN=amt-2 PE=3 SV=3	Osclob_v00_mik.OX382153.1G511.1	TRINITY_DN3558_c0_g1_i3
1582887	F:0	M:3	p:0.0472209	pcorr:0.0472209	AMT2_CAEELPutative ammonium transporter 2 OS=Caenorhabditis elegans OX=6239 GN=amt-2 PE=3 SV=3	Osclob_v00_mik.OX382153.1G511.1	TRINITY_DN3558_c0_g1_i16
1587122	F:0	M:3	p:0.0472209	pcorr:0.0472209	YRD6_CAEELUncharacterized protein K02A2.6 OS=Caenorhabditis elegans OX=6239 GN=K02A2.6 PE=4 SV=1	Osclob_v00_mik.OX382154.1G660.1	TRINITY_DN17154_c0_g1_i9
1587122	F:0	M:3	p:0.0472209	pcorr:0.0472209	YRD6_CAEELUncharacterized protein K02A2.6 OS=Caenorhabditis elegans OX=6239 GN=K02A2.6 PE=4 SV=1	Osclob_v00_mik.OX382154.1G660.1	TRINITY_DN17154_c0_g1_i1
1587122	F:0	M:3	p:0.0472209	pcorr:0.0472209	YRD6_CAEELUncharacterized protein K02A2.6 OS=Caenorhabditis elegans OX=6239 GN=K02A2.6 PE=4 SV=1	Osclob_v00_mik.OX382154.1G660.1	TRINITY_DN17154_c0_g1_i7
1587122	F:0	M:3	p:0.0472209	pcorr:0.0472209	-	Osclob_v00_mik.OX382154.1G660.1	TRINITY_DN17154_c0_g1_i2
1587122	F:0	M:3	p:0.0472209	pcorr:0.0472209	-	Osclob_v00_mik.OX382154.1G660.1	TRINITY_DN17154_c0_g1_i11
1590006	F:0	M:3	p:0.0472209	pcorr:0.0472209	-	Osclob_v00_mik.OX382169.1G391.1	TRINITY_DN12320_c0_g1_i5
1590006	F:0	M:3	p:0.0472209	pcorr:0.0472209	RHGBA_HUMANRho GTPase-activating protein 11A OS=Homo sapiens OX=9606 GN=ARHGAP11A PE=1 SV=2	Osclob_v00_mik.OX382169.1G391.1	TRINITY_DN12320_c0_g1_i4
1590006	F:0	M:3	p:0.0472209	pcorr:0.0472209	RHGBA_HUMANRho GTPase-activating protein 11A OS=Homo sapiens OX=9606 GN=ARHGAP11A PE=1 SV=2	Osclob_v00_mik.OX382169.1G391.1	TRINITY_DN12320_c0_g1_i2
1590006	F:0	M:3	p:0.0472209	pcorr:0.0472209	-	Osclob_v00_mik.OX382169.1G391.1	TRINITY_DN12320_c0_g1_i6
1590006	F:0	M:3	p:0.0472209	pcorr:0.0472209	RHGBA_HUMANRho GTPase-activating protein 11A OS=Homo sapiens OX=9606 GN=ARHGAP11A PE=1 SV=2	Osclob_v00_mik.OX382169.1G391.1	TRINITY_DN12320_c0_g1_i1
1590132	F:0	M:3	p:0.0472209	pcorr:0.0472209	RIPK2_MOUSEReceptor-interacting serine/threonine-protein kinase 2 OS=Mus musculus OX=10090 GN=Ripk2 PE=1 SV=1	Osclob_v00_mik.OX382150.1G1678.1	TRINITY_DN7588_c0_g2_i12
1590132	F:0	M:3	p:0.0472209	pcorr:0.0472209	RIPK2_MOUSEReceptor-interacting serine/threonine-protein kinase 2 OS=Mus musculus OX=10090 GN=Ripk2 PE=1 SV=1	Osclob_v00_mik.OX382150.1G1676.1	TRINITY_DN7588_c0_g2_i1
1590132	F:0	M:3	p:0.0472209	pcorr:0.0472209	RIPK2_MOUSEReceptor-interacting serine/threonine-protein kinase 2 OS=Mus musculus OX=10090 GN=Ripk2 PE=1 SV=1	Osclob_v00_mik.OX382150.1G1676.1	TRINITY_DN7588_c0_g2_i1
1590132	F:0	M:3	p:0.0472209	pcorr:0.0472209	RIPK2_BOVINReceptor-interacting serine/threonine-protein kinase 2 OS=Bos taurus OX=9913 GN=RIPK2 PE=2 SV=1	Osclob_v00_mik.OX382150.1G1190.2	TRINITY_DN7588_c0_g2_i10
1590132	F:0	M:3	p:0.0472209	pcorr:0.0472209	RIPK2_BOVINReceptor-interacting serine/threonine-protein kinase 2 OS=Bos taurus OX=9913 GN=RIPK2 PE=2 SV=1	Osclob_v00_mik.OX382150.1G1190.2	TRINITY_DN7588_c0_g2_i11
1590132	F:0	M:3	p:0.0472209	pcorr:0.0472209	RIPK2_BOVINReceptor-interacting serine/threonine-protein kinase 2 OS=Bos taurus OX=9913 GN=RIPK2 PE=2 SV=1	Osclob_v00_mik.OX382150.1G1678.1	TRINITY_DN7588_c0_g2_i8
1596884	F:0	M:3	p:0.0472209	pcorr:0.0472209	ATG4B_XENLACysteine protease ATG4B OS=Xenopus laevis OX=8355 GN=atg4b PE=2 SV=1	Osclob_v00_mik.OX382163.1G404.1	TRINITY_DN1169_c0_g1_i6
1596884	F:0	M:3	p:0.0472209	pcorr:0.0472209	ATG4B_XENLACysteine protease ATG4B OS=Xenopus laevis OX=8355 GN=atg4b PE=2 SV=1	Osclob_v00_mik.OX382163.1G404.1	TRINITY_DN1169_c0_g1_i11
1596884	F:0	M:3	p:0.0472209	pcorr:0.0472209	ATG4A_MOUSECysteine protease ATG4A OS=Mus musculus OX=10090 GN=Atg4a PE=2 SV=2	Osclob_v00_mik.OX382163.1G403.1	TRINITY_DN1169_c0_g1_i12
1596884	F:0	M:3	p:0.0472209	pcorr:0.0472209	ATG4B_XENLACysteine protease ATG4B OS=Xenopus laevis OX=8355 GN=atg4b PE=2 SV=1	Osclob_v00_mik.OX382163.1G404.1	TRINITY_DN1169_c0_g1_i14
1596884	F:0	M:3	p:0.0472209	pcorr:0.0472209	ATG4A_MOUSECysteine protease ATG4A OS=Mus musculus OX=10090 GN=Atg4a PE=2 SV=2	Osclob_v00_mik.OX382163.1G404.1	TRINITY_DN1169_c0_g1_i19
1600504	F:0	M:3	p:0.0472209	pcorr:0.0472209	-	*	TRINITY_DN45813_c0_g1_i3
1600504	F:0	M:3	p:0.0472209	pcorr:0.0472209	-	*	TRINITY_DN45813_c0_g1_i9
1600504	F:0	M:3	p:0.0472209	pcorr:0.0472209	-	*	TRINITY_DN45813_c0_g1_i4
1602696	F:0	M:3	p:0.0472209	pcorr:0.0472209	-	Osclob_v00_mik.OX382154.1G852.1	TRINITY_DN63854_c0_g1_i1
1602696	F:0	M:3	p:0.0472209	pcorr:0.0472209	FUCL1_ANGJAFucolectin-1 OS=Anguilla japonica OX=7937 PE=2 SV=1	Osclob_v00_mik.OX382154.1G852.1	TRINITY_DN467_c3_g1_i6
1602696	F:0	M:3	p:0.0472209	pcorr:0.0472209	FUCL1_ANGJAFucolectin-1 OS=Anguilla japonica OX=7937 PE=2 SV=1	Osclob_v00_mik.OX382154.1G852.1	TRINITY_DN467_c3_g1_i14
1602696	F:0	M:3	p:0.0472209	pcorr:0.0472209	FUCL6_ANGJAFucolectin-6 OS=Anguilla japonica OX=7937 PE=2 SV=1	Osclob_v00_mik.OX382154.1G723.1	TRINITY_DN21114_c0_g2_i3
1602696	F:0	M:3	p:0.0472209	pcorr:0.0472209	-	Osclob_v00_mik.OX382154.1G847.1	TRINITY_DN10338_c0_g2_i5
1603109	F:0	M:3	p:0.0472209	pcorr:0.0472209	OXA1L_HUMANMitochondrial inner membrane protein OXA1L OS=Homo sapiens OX=9606 GN=OXA1L PE=1 SV=3	Osclob_v00_mik.OX382152.1G852.1	TRINITY_DN8318_c0_g1_i7
1603109	F:0	M:3	p:0.0472209	pcorr:0.0472209	TTC5_HUMANTetratricopeptide repeat protein 5 OS=Homo sapiens OX=9606 GN=TTC5 PE=1 SV=2	Osclob_v00_mik.OX382152.1G845.1	TRINITY_DN8318_c0_g1_i8
1603109	F:0	M:3	p:0.0472209	pcorr:0.0472209	TTC5_HUMANTetratricopeptide repeat protein 5 OS=Homo sapiens OX=9606 GN=TTC5 PE=1 SV=2	Osclob_v00_mik.OX382152.1G845.1	TRINITY_DN8318_c0_g1_i2
1603109	F:0	M:3	p:0.0472209	pcorr:0.0472209	TTC5_HUMANTetratricopeptide repeat protein 5 OS=Homo sapiens OX=9606 GN=TTC5 PE=1 SV=2	Osclob_v00_mik.OX382152.1G845.1	TRINITY_DN8318_c0_g1_i3
1605290	F:0	M:3	p:0.0472209	pcorr:0.0472209	-	Osclob_v00_mik.OX382161.1G72.1	TRINITY_DN5382_c0_g1_i13
1605290	F:0	M:3	p:0.0472209	pcorr:0.0472209	-	Osclob_v00_mik.OX382161.1G72.1	TRINITY_DN5382_c0_g1_i13
1605290	F:0	M:3	p:0.0472209	pcorr:0.0472209	-	Osclob_v00_mik.OX382161.1G72.1	TRINITY_DN5382_c0_g1_i1
1605290	F:0	M:3	p:0.0472209	pcorr:0.0472209	-	Osclob_v00_mik.OX382161.1G72.1	TRINITY_DN5382_c0_g1_i1
1605290	F:0	M:3	p:0.0472209	pcorr:0.0472209	-	Osclob_v00_mik.OX382161.1G72.1	TRINITY_DN5382_c0_g1_i3
1605290	F:0	M:3	p:0.0472209	pcorr:0.0472209	-	Osclob_v00_mik.OX382161.1G72.1	TRINITY_DN5382_c0_g1_i3
1605290	F:0	M:3	p:0.0472209	pcorr:0.0472209	-	Osclob_v00_mik.OX382161.1G72.1	TRINITY_DN5382_c0_g1_i8
1605290	F:0	M:3	p:0.0472209	pcorr:0.0472209	-	Osclob_v00_mik.OX382161.1G72.1	TRINITY_DN5382_c0_g1_i8
1606053	F:0	M:3	p:0.0472209	pcorr:0.0472209	-	Osclob_v00_mik.OX382150.1G247.1	TRINITY_DN7848_c1_g1_i7
1606053	F:0	M:3	p:0.0472209	pcorr:0.0472209	-	Osclob_v00_mik.OX382150.1G247.1	TRINITY_DN7848_c1_g1_i19
1606053	F:0	M:3	p:0.0472209	pcorr:0.0472209	CC134_RATCoiled-coil domain-containing protein 134 OS=Rattus norvegicus OX=10116 GN=Ccdc134 PE=2 SV=1	Osclob_v00_mik.OX382150.1G247.1	TRINITY_DN7848_c1_g1_i18
1608951	F:0	M:3	p:0.0472209	pcorr:0.0472209	IPO7_HUMANImportin-7 OS=Homo sapiens OX=9606 GN=IPO7 PE=1 SV=1	Osclob_v00_mik.OX382158.1G258.1	TRINITY_DN5618_c0_g1_i5
1608951	F:0	M:3	p:0.0472209	pcorr:0.0472209	IPO7_HUMANImportin-7 OS=Homo sapiens OX=9606 GN=IPO7 PE=1 SV=1	Osclob_v00_mik.OX382158.1G258.1	TRINITY_DN5618_c0_g1_i2
1608951	F:0	M:3	p:0.0472209	pcorr:0.0472209	IPO7_HUMANImportin-7 OS=Homo sapiens OX=9606 GN=IPO7 PE=1 SV=1	Osclob_v00_mik.OX382158.1G258.1	TRINITY_DN5618_c0_g1_i1
1608951	F:0	M:3	p:0.0472209	pcorr:0.0472209	IPO7_HUMANImportin-7 OS=Homo sapiens OX=9606 GN=IPO7 PE=1 SV=1	Osclob_v00_mik.OX382158.1G258.1	TRINITY_DN5618_c0_g1_i6
1609188	F:0	M:3	p:0.0472209	pcorr:0.0472209	-	Osclob_v00_mik.OX382155.1G337.1	TRINITY_DN70352_c0_g1_i1
1611581	F:0	M:3	p:0.0472209	pcorr:0.0472209	-	Osclob_v00_mik.OX382158.1G529.1	TRINITY_DN26267_c0_g1_i2
1611581	F:0	M:3	p:0.0472209	pcorr:0.0472209	-	Osclob_v00_mik.OX382158.1G529.1	TRINITY_DN1597_c0_g1_i5
1611581	F:0	M:3	p:0.0472209	pcorr:0.0472209	-	Osclob_v00_mik.OX382158.1G529.1	TRINITY_DN1597_c0_g1_i3
1611581	F:0	M:3	p:0.0472209	pcorr:0.0472209	-	Osclob_v00_mik.OX382158.1G529.1	TRINITY_DN1597_c0_g1_i16
1611581	F:0	M:3	p:0.0472209	pcorr:0.0472209	-	Osclob_v00_mik.OX382158.1G529.1	TRINITY_DN1597_c0_g1_i13
1613537	F:0	M:3	p:0.0472209	pcorr:0.0472209	-	*	TRINITY_DN45813_c0_g1_i3
1613537	F:0	M:3	p:0.0472209	pcorr:0.0472209	-	*	TRINITY_DN45813_c0_g1_i9
1613537	F:0	M:3	p:0.0472209	pcorr:0.0472209	-	*	TRINITY_DN45813_c0_g1_i4
1613700	F:0	M:3	p:0.0472209	pcorr:0.0472209	XYLT_DROPSXylosyltransferase oxt OS=Drosophila pseudoobscura pseudoobscura OX=46245 GN=oxt PE=2 SV=1	Osclob_v00_mik.OX382162.1G209.1	TRINITY_DN6287_c0_g3_i1
1613700	F:0	M:3	p:0.0472209	pcorr:0.0472209	-	Osclob_v00_mik.OX382162.1G209.1	TRINITY_DN18922_c0_g1_i1
1613700	F:0	M:3	p:0.0472209	pcorr:0.0472209	-	Osclob_v00_mik.OX382162.1G209.1	TRINITY_DN5447_c0_g2_i5
1613700	F:0	M:3	p:0.0472209	pcorr:0.0472209	-	Osclob_v00_mik.OX382162.1G208.1	TRINITY_DN5447_c0_g2_i4
1613848	F:0	M:3	p:0.0472209	pcorr:0.0472209	-	*	TRINITY_DN45813_c0_g1_i3
1613848	F:0	M:3	p:0.0472209	pcorr:0.0472209	-	*	TRINITY_DN45813_c0_g1_i9
1613848	F:0	M:3	p:0.0472209	pcorr:0.0472209	-	*	TRINITY_DN45813_c0_g1_i4
1617810	F:0	M:3	p:0.0472209	pcorr:0.0472209	-	Osclob_v00_mik.OX382150.1G990.1	TRINITY_DN12981_c0_g1_i14
1617810	F:0	M:3	p:0.0472209	pcorr:0.0472209	-	*	TRINITY_DN12981_c0_g1_i12
1617810	F:0	M:3	p:0.0472209	pcorr:0.0472209	-	*	TRINITY_DN12981_c0_g1_i11
1617810	F:0	M:3	p:0.0472209	pcorr:0.0472209	-	Osclob_v00_mik.OX382150.1G990.1	TRINITY_DN12981_c0_g1_i10
1617810	F:0	M:3	p:0.0472209	pcorr:0.0472209	-	Osclob_v00_mik.OX382150.1G990.1	TRINITY_DN12981_c0_g1_i16
1618299	F:0	M:3	p:0.0472209	pcorr:0.0472209	-	*	TRINITY_DN37903_c0_g1_i9
1618299	F:0	M:3	p:0.0472209	pcorr:0.0472209	-	*	TRINITY_DN37903_c0_g1_i14
1618299	F:0	M:3	p:0.0472209	pcorr:0.0472209	-	Osclob_v00_mik.OX382169.1G433.1	TRINITY_DN37903_c0_g1_i15
1618299	F:0	M:3	p:0.0472209	pcorr:0.0472209	-	*	TRINITY_DN37903_c0_g1_i4
1618299	F:0	M:3	p:0.0472209	pcorr:0.0472209	-	Osclob_v00_mik.OX382151.1G405.1	TRINITY_DN37903_c0_g1_i12
1618650	F:0	M:3	p:0.0472209	pcorr:0.0472209	-	*	TRINITY_DN2840_c1_g1_i1
1618650	F:0	M:3	p:0.0472209	pcorr:0.0472209	-	*	TRINITY_DN2840_c1_g1_i2
1620518	F:0	M:3	p:0.0472209	pcorr:0.0472209	FAT4_HUMANProtocadherin Fat 4 OS=Homo sapiens OX=9606 GN=FAT4 PE=1 SV=2	Osclob_v00_mik.OX382159.1G154.2	TRINITY_DN1021_c0_g1_i2
1620518	F:0	M:3	p:0.0472209	pcorr:0.0472209	FAT4_HUMANProtocadherin Fat 4 OS=Homo sapiens OX=9606 GN=FAT4 PE=1 SV=2	Osclob_v00_mik.OX382159.1G154.2	TRINITY_DN1021_c0_g1_i1
1620518	F:0	M:3	p:0.0472209	pcorr:0.0472209	FAT4_HUMANProtocadherin Fat 4 OS=Homo sapiens OX=9606 GN=FAT4 PE=1 SV=2	Osclob_v00_mik.OX382159.1G154.2	TRINITY_DN1021_c0_g1_i5
1620829	F:0	M:3	p:0.0472209	pcorr:0.0472209	TAF6L_MOUSETAF6-like RNA polymerase II p300/CBP-associated factor-associated factor 65 kDa subunit 6L OS=Mus musculus OX=10090 GN=Taf6l PE=1 SV=1	Osclob_v00_mik.OX382156.1G431.1	TRINITY_DN2975_c0_g1_i17
1620829	F:0	M:3	p:0.0472209	pcorr:0.0472209	TAF6L_MOUSETAF6-like RNA polymerase II p300/CBP-associated factor-associated factor 65 kDa subunit 6L OS=Mus musculus OX=10090 GN=Taf6l PE=1 SV=1	Osclob_v00_mik.OX382156.1G431.1	TRINITY_DN2975_c0_g1_i3
1620829	F:0	M:3	p:0.0472209	pcorr:0.0472209	UBXN1_HUMANUBX domain-containing protein 1 OS=Homo sapiens OX=9606 GN=UBXN1 PE=1 SV=2	Osclob_v00_mik.OX382156.1G434.1	TRINITY_DN2975_c0_g1_i19
1620829	F:0	M:3	p:0.0472209	pcorr:0.0472209	TAF6L_MOUSETAF6-like RNA polymerase II p300/CBP-associated factor-associated factor 65 kDa subunit 6L OS=Mus musculus OX=10090 GN=Taf6l PE=1 SV=1	Osclob_v00_mik.OX382156.1G431.1	TRINITY_DN2975_c0_g1_i24
1620829	F:0	M:3	p:0.0472209	pcorr:0.0472209	TAF6L_HUMANTAF6-like RNA polymerase II p300/CBP-associated factor-associated factor 65 kDa subunit 6L OS=Homo sapiens OX=9606 GN=TAF6L PE=1 SV=1	Osclob_v00_mik.OX382156.1G431.1	TRINITY_DN2975_c0_g1_i25
1621223	F:0	M:3	p:0.0472209	pcorr:0.0472209	TRM1_MOUSEtRNA (guanine(26)-N(2))-dimethyltransferase OS=Mus musculus OX=10090 GN=Trmt1 PE=1 SV=2	Osclob_v00_mik.OX382151.1G99.1	TRINITY_DN8933_c0_g1_i10
1621223	F:0	M:3	p:0.0472209	pcorr:0.0472209	TRM1_MOUSEtRNA (guanine(26)-N(2))-dimethyltransferase OS=Mus musculus OX=10090 GN=Trmt1 PE=1 SV=2	Osclob_v00_mik.OX382151.1G99.1	TRINITY_DN8933_c0_g1_i14
1621223	F:0	M:3	p:0.0472209	pcorr:0.0472209	TRM1_MOUSEtRNA (guanine(26)-N(2))-dimethyltransferase OS=Mus musculus OX=10090 GN=Trmt1 PE=1 SV=2	Osclob_v00_mik.OX382151.1G99.1	TRINITY_DN8933_c0_g1_i7
1621223	F:0	M:3	p:0.0472209	pcorr:0.0472209	TRM1_MOUSEtRNA (guanine(26)-N(2))-dimethyltransferase OS=Mus musculus OX=10090 GN=Trmt1 PE=1 SV=2	Osclob_v00_mik.OX382151.1G99.1	TRINITY_DN8933_c0_g1_i5
1621223	F:0	M:3	p:0.0472209	pcorr:0.0472209	TRM1_MOUSEtRNA (guanine(26)-N(2))-dimethyltransferase OS=Mus musculus OX=10090 GN=Trmt1 PE=1 SV=2	Osclob_v00_mik.OX382151.1G99.1	TRINITY_DN8933_c0_g1_i3
1621613	F:0	M:3	p:0.0472209	pcorr:0.0472209	-	*	TRINITY_DN16290_c0_g1_i1
1621613	F:0	M:3	p:0.0472209	pcorr:0.0472209	-	Osclob_v00_mik.OX382150.1G993.1	TRINITY_DN16290_c0_g1_i2
1621613	F:0	M:3	p:0.0472209	pcorr:0.0472209	-	*	TRINITY_DN16290_c0_g1_i3
1622044	F:0	M:3	p:0.0472209	pcorr:0.0472209	ERC6L_MOUSEDNA excision repair protein ERCC-6-like OS=Mus musculus OX=10090 GN=Ercc6l PE=1 SV=1	Osclob_v00_mik.OX382154.1G751.1	TRINITY_DN127_c1_g1_i9
1622044	F:0	M:3	p:0.0472209	pcorr:0.0472209	ERC6L_MOUSEDNA excision repair protein ERCC-6-like OS=Mus musculus OX=10090 GN=Ercc6l PE=1 SV=1	Osclob_v00_mik.OX382154.1G751.1	TRINITY_DN127_c1_g1_i13
1622044	F:0	M:3	p:0.0472209	pcorr:0.0472209	ERC6L_MOUSEDNA excision repair protein ERCC-6-like OS=Mus musculus OX=10090 GN=Ercc6l PE=1 SV=1	Osclob_v00_mik.OX382154.1G751.1	TRINITY_DN127_c1_g1_i6
1622044	F:0	M:3	p:0.0472209	pcorr:0.0472209	ERC6L_MOUSEDNA excision repair protein ERCC-6-like OS=Mus musculus OX=10090 GN=Ercc6l PE=1 SV=1	Osclob_v00_mik.OX382154.1G751.1	TRINITY_DN127_c1_g1_i8
1622044	F:0	M:3	p:0.0472209	pcorr:0.0472209	ERC6L_MOUSEDNA excision repair protein ERCC-6-like OS=Mus musculus OX=10090 GN=Ercc6l PE=1 SV=1	Osclob_v00_mik.OX382154.1G751.1	TRINITY_DN127_c1_g1_i1
1623627	F:0	M:3	p:0.0472209	pcorr:0.0472209	-	*	TRINITY_DN45813_c0_g1_i3
1623627	F:0	M:3	p:0.0472209	pcorr:0.0472209	-	*	TRINITY_DN45813_c0_g1_i9
1623627	F:0	M:3	p:0.0472209	pcorr:0.0472209	-	*	TRINITY_DN45813_c0_g1_i4
1626095	F:0	M:3	p:0.0472209	pcorr:0.0472209	SNR40_MOUSEU5 small nuclear ribonucleoprotein 40 kDa protein OS=Mus musculus OX=10090 GN=Snrnp40 PE=1 SV=1	Osclob_v00_mik.OX382154.1G542.1	TRINITY_DN4544_c0_g1_i20
1626095	F:0	M:3	p:0.0472209	pcorr:0.0472209	SNR40_MOUSEU5 small nuclear ribonucleoprotein 40 kDa protein OS=Mus musculus OX=10090 GN=Snrnp40 PE=1 SV=1	Osclob_v00_mik.OX382154.1G542.1	TRINITY_DN4544_c0_g1_i20
1626095	F:0	M:3	p:0.0472209	pcorr:0.0472209	SNR40_MOUSEU5 small nuclear ribonucleoprotein 40 kDa protein OS=Mus musculus OX=10090 GN=Snrnp40 PE=1 SV=1	Osclob_v00_mik.OX382154.1G531.1	TRINITY_DN4544_c0_g1_i15
1626095	F:0	M:3	p:0.0472209	pcorr:0.0472209	SNR40_MOUSEU5 small nuclear ribonucleoprotein 40 kDa protein OS=Mus musculus OX=10090 GN=Snrnp40 PE=1 SV=1	Osclob_v00_mik.OX382154.1G531.1	TRINITY_DN4544_c0_g1_i15
1626095	F:0	M:3	p:0.0472209	pcorr:0.0472209	SNR40_MOUSEU5 small nuclear ribonucleoprotein 40 kDa protein OS=Mus musculus OX=10090 GN=Snrnp40 PE=1 SV=1	Osclob_v00_mik.OX382154.1G542.1	TRINITY_DN4544_c0_g1_i13
1626095	F:0	M:3	p:0.0472209	pcorr:0.0472209	SNR40_MOUSEU5 small nuclear ribonucleoprotein 40 kDa protein OS=Mus musculus OX=10090 GN=Snrnp40 PE=1 SV=1	Osclob_v00_mik.OX382154.1G542.1	TRINITY_DN4544_c0_g1_i13
1626095	F:0	M:3	p:0.0472209	pcorr:0.0472209	TB10A_MOUSETBC1 domain family member 10A OS=Mus musculus OX=10090 GN=Tbc1d10a PE=1 SV=1	Osclob_v00_mik.OX382154.1G542.1	TRINITY_DN4544_c0_g1_i5
1626095	F:0	M:3	p:0.0472209	pcorr:0.0472209	TB10A_MOUSETBC1 domain family member 10A OS=Mus musculus OX=10090 GN=Tbc1d10a PE=1 SV=1	Osclob_v00_mik.OX382154.1G542.1	TRINITY_DN4544_c0_g1_i5
1626095	F:0	M:3	p:0.0472209	pcorr:0.0472209	SNR40_MOUSEU5 small nuclear ribonucleoprotein 40 kDa protein OS=Mus musculus OX=10090 GN=Snrnp40 PE=1 SV=1	Osclob_v00_mik.OX382154.1G532.1	TRINITY_DN4544_c0_g1_i12
1626095	F:0	M:3	p:0.0472209	pcorr:0.0472209	SNR40_MOUSEU5 small nuclear ribonucleoprotein 40 kDa protein OS=Mus musculus OX=10090 GN=Snrnp40 PE=1 SV=1	Osclob_v00_mik.OX382154.1G532.1	TRINITY_DN4544_c0_g1_i12
1630071	F:0	M:3	p:0.0472209	pcorr:0.0472209	-	*	TRINITY_DN45813_c0_g1_i3
1630071	F:0	M:3	p:0.0472209	pcorr:0.0472209	-	*	TRINITY_DN45813_c0_g1_i9
1630071	F:0	M:3	p:0.0472209	pcorr:0.0472209	-	*	TRINITY_DN45813_c0_g1_i4
1630173	F:0	M:3	p:0.0472209	pcorr:0.0472209	-	*	TRINITY_DN67605_c0_g3_i1
1630173	F:0	M:3	p:0.0472209	pcorr:0.0472209	-	*	TRINITY_DN67605_c0_g1_i6
1630173	F:0	M:3	p:0.0472209	pcorr:0.0472209	-	*	TRINITY_DN67605_c0_g1_i4
1630173	F:0	M:3	p:0.0472209	pcorr:0.0472209	-	*	TRINITY_DN7074_c1_g1_i1
1630173	F:0	M:3	p:0.0472209	pcorr:0.0472209	-	*	TRINITY_DN67605_c0_g1_i2
1630885	F:0	M:3	p:0.0472209	pcorr:0.0472209	-	*	TRINITY_DN45813_c0_g1_i3
1630885	F:0	M:3	p:0.0472209	pcorr:0.0472209	-	*	TRINITY_DN45813_c0_g1_i9
1630885	F:0	M:3	p:0.0472209	pcorr:0.0472209	-	*	TRINITY_DN45813_c0_g1_i4
1632424	F:0	M:3	p:0.0472209	pcorr:0.0472209	RXLT1_DANRERibitol-5-phosphate xylosyltransferase 1 OS=Danio rerio OX=7955 GN=rxylt1 PE=2 SV=2	Osclob_v00_mik.OX382161.1G438.1	TRINITY_DN663_c3_g1_i11
1632424	F:0	M:3	p:0.0472209	pcorr:0.0472209	RXLT1_DANRERibitol-5-phosphate xylosyltransferase 1 OS=Danio rerio OX=7955 GN=rxylt1 PE=2 SV=2	Osclob_v00_mik.OX382161.1G438.1	TRINITY_DN663_c3_g1_i13
1632424	F:0	M:3	p:0.0472209	pcorr:0.0472209	RXLT1_DANRERibitol-5-phosphate xylosyltransferase 1 OS=Danio rerio OX=7955 GN=rxylt1 PE=2 SV=2	Osclob_v00_mik.OX382161.1G438.1	TRINITY_DN663_c3_g1_i8
1632424	F:0	M:3	p:0.0472209	pcorr:0.0472209	RXLT1_DANRERibitol-5-phosphate xylosyltransferase 1 OS=Danio rerio OX=7955 GN=rxylt1 PE=2 SV=2	Osclob_v00_mik.OX382161.1G438.1	TRINITY_DN663_c3_g1_i3
1632472	F:0	M:3	p:0.0472209	pcorr:0.0472209	TMTC3_MOUSEProtein O-mannosyl-transferase TMTC3 OS=Mus musculus OX=10090 GN=Tmtc3 PE=1 SV=2	Osclob_v00_mik.OX382157.1G167.1	TRINITY_DN12795_c0_g1_i14
1632472	F:0	M:3	p:0.0472209	pcorr:0.0472209	TMTC3_MOUSEProtein O-mannosyl-transferase TMTC3 OS=Mus musculus OX=10090 GN=Tmtc3 PE=1 SV=2	Osclob_v00_mik.OX382157.1G167.1	TRINITY_DN12795_c0_g1_i24
1632472	F:0	M:3	p:0.0472209	pcorr:0.0472209	TMTC3_MOUSEProtein O-mannosyl-transferase TMTC3 OS=Mus musculus OX=10090 GN=Tmtc3 PE=1 SV=2	Osclob_v00_mik.OX382157.1G167.1	TRINITY_DN12795_c0_g1_i41
1632472	F:0	M:3	p:0.0472209	pcorr:0.0472209	TMTC3_MOUSEProtein O-mannosyl-transferase TMTC3 OS=Mus musculus OX=10090 GN=Tmtc3 PE=1 SV=2	Osclob_v00_mik.OX382157.1G167.1	TRINITY_DN12795_c0_g1_i4
1632472	F:0	M:3	p:0.0472209	pcorr:0.0472209	TMTC3_MOUSEProtein O-mannosyl-transferase TMTC3 OS=Mus musculus OX=10090 GN=Tmtc3 PE=1 SV=2	Osclob_v00_mik.OX382157.1G167.1	TRINITY_DN12795_c0_g1_i6
1632933	F:0	M:3	p:0.0472209	pcorr:0.0472209	-	*	TRINITY_DN92203_c0_g1_i1
1632933	F:0	M:3	p:0.0472209	pcorr:0.0472209	-	*	TRINITY_DN92203_c0_g1_i3
1632933	F:0	M:3	p:0.0472209	pcorr:0.0472209	APN1_CAEELApurinic-apyrimidinic endonuclease OS=Caenorhabditis elegans OX=6239 GN=apn-1 PE=2 SV=2	Osclob_v00_mik.OX382151.1G725.1	TRINITY_DN92203_c0_g1_i4
1632933	F:0	M:3	p:0.0472209	pcorr:0.0472209	APN1_CAEELApurinic-apyrimidinic endonuclease OS=Caenorhabditis elegans OX=6239 GN=apn-1 PE=2 SV=2	Osclob_v00_mik.OX382151.1G725.1	TRINITY_DN92203_c0_g1_i4
1632933	F:0	M:3	p:0.0472209	pcorr:0.0472209	APN1_CAEELApurinic-apyrimidinic endonuclease OS=Caenorhabditis elegans OX=6239 GN=apn-1 PE=2 SV=2	Osclob_v00_mik.OX382151.1G725.1	TRINITY_DN92203_c0_g1_i2
1632933	F:0	M:3	p:0.0472209	pcorr:0.0472209	APN1_CAEELApurinic-apyrimidinic endonuclease OS=Caenorhabditis elegans OX=6239 GN=apn-1 PE=2 SV=2	Osclob_v00_mik.OX382151.1G725.1	TRINITY_DN92203_c0_g1_i2
1635300	F:0	M:3	p:0.0472209	pcorr:0.0472209	OXND1_MOUSEOxidoreductase NAD-binding domain-containing protein 1 OS=Mus musculus OX=10090 GN=Oxnad1 PE=1 SV=2	Osclob_v00_mik.OX382167.1G416.1	TRINITY_DN5003_c0_g2_i13
1635300	F:0	M:3	p:0.0472209	pcorr:0.0472209	OXND1_MOUSEOxidoreductase NAD-binding domain-containing protein 1 OS=Mus musculus OX=10090 GN=Oxnad1 PE=1 SV=2	Osclob_v00_mik.OX382167.1G416.1	TRINITY_DN5003_c0_g2_i19
1635300	F:0	M:3	p:0.0472209	pcorr:0.0472209	OXND1_MOUSEOxidoreductase NAD-binding domain-containing protein 1 OS=Mus musculus OX=10090 GN=Oxnad1 PE=1 SV=2	Osclob_v00_mik.OX382167.1G416.1	TRINITY_DN5003_c0_g2_i12
1635300	F:0	M:3	p:0.0472209	pcorr:0.0472209	OXND1_MOUSEOxidoreductase NAD-binding domain-containing protein 1 OS=Mus musculus OX=10090 GN=Oxnad1 PE=1 SV=2	Osclob_v00_mik.OX382167.1G416.1	TRINITY_DN5003_c0_g2_i18
1635300	F:0	M:3	p:0.0472209	pcorr:0.0472209	OXND1_MOUSEOxidoreductase NAD-binding domain-containing protein 1 OS=Mus musculus OX=10090 GN=Oxnad1 PE=1 SV=2	Osclob_v00_mik.OX382167.1G416.1	TRINITY_DN5003_c0_g2_i17
1636428	F:0	M:3	p:0.0472209	pcorr:0.0472209	PAR14_HUMANProtein mono-ADP-ribosyltransferase PARP14 OS=Homo sapiens OX=9606 GN=PARP14 PE=1 SV=3	Osclob_v00_mik.OX382151.1G35.1	TRINITY_DN2444_c0_g2_i1
1636428	F:0	M:3	p:0.0472209	pcorr:0.0472209	PAR14_HUMANProtein mono-ADP-ribosyltransferase PARP14 OS=Homo sapiens OX=9606 GN=PARP14 PE=1 SV=3	Osclob_v00_mik.OX382151.1G35.1	TRINITY_DN2444_c0_g2_i1
1638807	F:0	M:3	p:0.0472209	pcorr:0.0472209	-	Osclob_v00_mik.OX382168.1G131.1	TRINITY_DN74494_c0_g1_i2
1638807	F:0	M:3	p:0.0472209	pcorr:0.0472209	-	Osclob_v00_mik.OX382168.1G131.1	TRINITY_DN74494_c0_g1_i1
1648489	F:0	M:3	p:0.0472209	pcorr:0.0472209	-	Osclob_v00_mik.OX382159.1G308.2	TRINITY_DN58028_c0_g1_i1
1648489	F:0	M:3	p:0.0472209	pcorr:0.0472209	DEN4B_HUMANDENN domain-containing protein 4B OS=Homo sapiens OX=9606 GN=DENND4B PE=1 SV=4	Osclob_v00_mik.OX382159.1G306.1	TRINITY_DN208_c0_g1_i7
1648489	F:0	M:3	p:0.0472209	pcorr:0.0472209	DEN4B_HUMANDENN domain-containing protein 4B OS=Homo sapiens OX=9606 GN=DENND4B PE=1 SV=4	Osclob_v00_mik.OX382159.1G306.1	TRINITY_DN208_c0_g1_i4
1648489	F:0	M:3	p:0.0472209	pcorr:0.0472209	DEN4B_HUMANDENN domain-containing protein 4B OS=Homo sapiens OX=9606 GN=DENND4B PE=1 SV=4	Osclob_v00_mik.OX382159.1G306.1	TRINITY_DN208_c0_g1_i5
1648489	F:0	M:3	p:0.0472209	pcorr:0.0472209	DEN4B_HUMANDENN domain-containing protein 4B OS=Homo sapiens OX=9606 GN=DENND4B PE=1 SV=4	Osclob_v00_mik.OX382159.1G306.1	TRINITY_DN208_c0_g1_i2
1650301	F:0	M:3	p:0.0472209	pcorr:0.0472209	SETB1_XENLAHistone-lysine N-methyltransferase SETDB1 OS=Xenopus laevis OX=8355 GN=setdb1 PE=2 SV=1	Osclob_v00_mik.OX382165.1G419.1	TRINITY_DN5252_c1_g1_i13
1650301	F:0	M:3	p:0.0472209	pcorr:0.0472209	SETB1_XENLAHistone-lysine N-methyltransferase SETDB1 OS=Xenopus laevis OX=8355 GN=setdb1 PE=2 SV=1	Osclob_v00_mik.OX382165.1G419.1	TRINITY_DN5252_c1_g1_i10
1650301	F:0	M:3	p:0.0472209	pcorr:0.0472209	-	Osclob_v00_mik.OX382165.1G419.1	TRINITY_DN5252_c1_g1_i15
1650301	F:0	M:3	p:0.0472209	pcorr:0.0472209	SETB1_XENLAHistone-lysine N-methyltransferase SETDB1 OS=Xenopus laevis OX=8355 GN=setdb1 PE=2 SV=1	Osclob_v00_mik.OX382165.1G419.1	TRINITY_DN5252_c1_g1_i16
1650301	F:0	M:3	p:0.0472209	pcorr:0.0472209	SETB1_XENLAHistone-lysine N-methyltransferase SETDB1 OS=Xenopus laevis OX=8355 GN=setdb1 PE=2 SV=1	Osclob_v00_mik.OX382165.1G419.1	TRINITY_DN5252_c1_g1_i8
1663546	F:0	M:3	p:0.0472209	pcorr:0.0472209	FUCL1_ANGJAFucolectin-1 OS=Anguilla japonica OX=7937 PE=2 SV=1	Osclob_v00_mik.OX382154.1G852.1	TRINITY_DN467_c3_g1_i6
1663546	F:0	M:3	p:0.0472209	pcorr:0.0472209	FUCL1_ANGJAFucolectin-1 OS=Anguilla japonica OX=7937 PE=2 SV=1	Osclob_v00_mik.OX382154.1G852.1	TRINITY_DN467_c3_g1_i14
1663546	F:0	M:3	p:0.0472209	pcorr:0.0472209	-	Osclob_v00_mik.OX382154.1G852.1	TRINITY_DN63854_c0_g1_i1
1663546	F:0	M:3	p:0.0472209	pcorr:0.0472209	FUCL_ANGANFucolectin OS=Anguilla anguilla OX=7936 PE=1 SV=1	Osclob_v00_mik.OX382154.1G851.1	TRINITY_DN114275_c0_g2_i2
1663546	F:0	M:3	p:0.0472209	pcorr:0.0472209	FUCL_ANGANFucolectin OS=Anguilla anguilla OX=7936 PE=1 SV=1	Osclob_v00_mik.OX382154.1G851.1	TRINITY_DN114275_c0_g2_i4
1669480	F:0	M:3	p:0.0472209	pcorr:0.0472209	RGPA1_HUMANRal GTPase-activating protein subunit alpha-1 OS=Homo sapiens OX=9606 GN=RALGAPA1 PE=1 SV=1	Osclob_v00_mik.OX382156.1G429.1	TRINITY_DN2690_c0_g2_i1
1669480	F:0	M:3	p:0.0472209	pcorr:0.0472209	RGPA1_HUMANRal GTPase-activating protein subunit alpha-1 OS=Homo sapiens OX=9606 GN=RALGAPA1 PE=1 SV=1	Osclob_v00_mik.OX382156.1G429.1	TRINITY_DN2690_c0_g2_i2
1672961	F:0	M:3	p:0.0472209	pcorr:0.0472209	-	Osclob_v00_mik.OX382152.1G309.1	TRINITY_DN18379_c0_g1_i5
1672961	F:0	M:3	p:0.0472209	pcorr:0.0472209	-	Osclob_v00_mik.OX382152.1G309.1	TRINITY_DN18379_c0_g1_i4
1672961	F:0	M:3	p:0.0472209	pcorr:0.0472209	-	Osclob_v00_mik.OX382152.1G309.1	TRINITY_DN18379_c0_g1_i7
1672961	F:0	M:3	p:0.0472209	pcorr:0.0472209	-	Osclob_v00_mik.OX382152.1G309.1	TRINITY_DN18379_c0_g1_i3
1672961	F:0	M:3	p:0.0472209	pcorr:0.0472209	-	Osclob_v00_mik.OX382152.1G309.1	TRINITY_DN18379_c0_g1_i2
1676326	F:0	M:3	p:0.0472209	pcorr:0.0472209	QORX_HUMANQuinone oxidoreductase PIG3 OS=Homo sapiens OX=9606 GN=TP53I3 PE=1 SV=2	Osclob_v00_mik.OX382160.1G574.1	TRINITY_DN8062_c1_g2_i11
1676326	F:0	M:3	p:0.0472209	pcorr:0.0472209	QORX_HUMANQuinone oxidoreductase PIG3 OS=Homo sapiens OX=9606 GN=TP53I3 PE=1 SV=2	Osclob_v00_mik.OX382160.1G572.1	TRINITY_DN8062_c1_g2_i7
1676326	F:0	M:3	p:0.0472209	pcorr:0.0472209	QORX_HUMANQuinone oxidoreductase PIG3 OS=Homo sapiens OX=9606 GN=TP53I3 PE=1 SV=2	Osclob_v00_mik.OX382160.1G572.1	TRINITY_DN8062_c1_g1_i3
1676326	F:0	M:3	p:0.0472209	pcorr:0.0472209	QORX_HUMANQuinone oxidoreductase PIG3 OS=Homo sapiens OX=9606 GN=TP53I3 PE=1 SV=2	Osclob_v00_mik.OX382160.1G574.1	TRINITY_DN8062_c1_g2_i13
1676326	F:0	M:3	p:0.0472209	pcorr:0.0472209	-	Osclob_v00_mik.OX382160.1G574.1	TRINITY_DN19415_c0_g1_i1
1682675	F:0	M:3	p:0.0472209	pcorr:0.0472209	HMCN1_MOUSEHemicentin-1 OS=Mus musculus OX=10090 GN=Hmcn1 PE=1 SV=1	Osclob_v00_mik.OX382153.1G887.1	TRINITY_DN3258_c0_g1_i10
1682675	F:0	M:3	p:0.0472209	pcorr:0.0472209	HMCN1_HUMANHemicentin-1 OS=Homo sapiens OX=9606 GN=HMCN1 PE=1 SV=2	Osclob_v00_mik.OX382153.1G887.1	TRINITY_DN3258_c0_g1_i11
1682675	F:0	M:3	p:0.0472209	pcorr:0.0472209	HMCN1_MOUSEHemicentin-1 OS=Mus musculus OX=10090 GN=Hmcn1 PE=1 SV=1	Osclob_v00_mik.OX382153.1G887.1	TRINITY_DN3258_c0_g1_i9
1682675	F:0	M:3	p:0.0472209	pcorr:0.0472209	HMCN1_MOUSEHemicentin-1 OS=Mus musculus OX=10090 GN=Hmcn1 PE=1 SV=1	Osclob_v00_mik.OX382153.1G887.1	TRINITY_DN3258_c0_g1_i5
1682675	F:0	M:3	p:0.0472209	pcorr:0.0472209	HMCN1_MOUSEHemicentin-1 OS=Mus musculus OX=10090 GN=Hmcn1 PE=1 SV=1	Osclob_v00_mik.OX382153.1G887.1	TRINITY_DN3258_c0_g1_i6
1685114	F:0	M:3	p:0.0472209	pcorr:0.0472209	-	*	TRINITY_DN45813_c0_g1_i3
1685114	F:0	M:3	p:0.0472209	pcorr:0.0472209	-	*	TRINITY_DN45813_c0_g1_i9
1685114	F:0	M:3	p:0.0472209	pcorr:0.0472209	-	*	TRINITY_DN45813_c0_g1_i4
1707559	F:0	M:3	p:0.0472209	pcorr:0.0472209	-	*	TRINITY_DN141813_c0_g1_i1
1707559	F:0	M:3	p:0.0472209	pcorr:0.0472209	-	*	TRINITY_DN119500_c0_g1_i1
1709342	F:0	M:3	p:0.0472209	pcorr:0.0472209	-	Osclob_v00_mik.OX382161.1G298.1	TRINITY_DN3668_c1_g2_i1
1709342	F:0	M:3	p:0.0472209	pcorr:0.0472209	ACSA_MOUSEAcetyl-coenzyme A synthetase, cytoplasmic OS=Mus musculus OX=10090 GN=Acss2 PE=1 SV=2	Osclob_v00_mik.OX382161.1G298.1	TRINITY_DN3668_c1_g2_i2
1709427	F:0	M:3	p:0.0472209	pcorr:0.0472209	-	Osclob_v00_mik.OX382158.1G414.1	TRINITY_DN94404_c0_g1_i1
1712399	F:0	M:3	p:0.0472209	pcorr:0.0472209	-	Osclob_v00_mik.OX382162.1G259.1	TRINITY_DN689_c0_g1_i2
1712399	F:0	M:3	p:0.0472209	pcorr:0.0472209	-	Osclob_v00_mik.OX382162.1G259.1	TRINITY_DN689_c0_g1_i1
1712399	F:0	M:3	p:0.0472209	pcorr:0.0472209	-	Osclob_v00_mik.OX382162.1G263.1	TRINITY_DN13388_c0_g1_i1
1712399	F:0	M:3	p:0.0472209	pcorr:0.0472209	-	Osclob_v00_mik.OX382162.1G259.1	TRINITY_DN13388_c0_g1_i2
1723723	F:0	M:3	p:0.0472209	pcorr:0.0472209	-	Osclob_v00_mik.OX382160.1G619.1	TRINITY_DN69638_c0_g1_i1
1724987	F:0	M:3	p:0.0472209	pcorr:0.0472209	MSH2_MOUSEDNA mismatch repair protein Msh2 OS=Mus musculus OX=10090 GN=Msh2 PE=1 SV=1	Osclob_v00_mik.OX382160.1G364.2	TRINITY_DN5130_c2_g1_i24
1724987	F:0	M:3	p:0.0472209	pcorr:0.0472209	MSH2_MOUSEDNA mismatch repair protein Msh2 OS=Mus musculus OX=10090 GN=Msh2 PE=1 SV=1	Osclob_v00_mik.OX382160.1G364.2	TRINITY_DN5130_c2_g1_i6
1724987	F:0	M:3	p:0.0472209	pcorr:0.0472209	MSH2_MOUSEDNA mismatch repair protein Msh2 OS=Mus musculus OX=10090 GN=Msh2 PE=1 SV=1	Osclob_v00_mik.OX382160.1G364.2	TRINITY_DN5130_c2_g1_i14
1724987	F:0	M:3	p:0.0472209	pcorr:0.0472209	MSH2_MOUSEDNA mismatch repair protein Msh2 OS=Mus musculus OX=10090 GN=Msh2 PE=1 SV=1	Osclob_v00_mik.OX382160.1G364.2	TRINITY_DN5130_c2_g1_i5
1724987	F:0	M:3	p:0.0472209	pcorr:0.0472209	MSH2_MOUSEDNA mismatch repair protein Msh2 OS=Mus musculus OX=10090 GN=Msh2 PE=1 SV=1	Osclob_v00_mik.OX382160.1G364.1	TRINITY_DN5130_c2_g1_i19
1730873	F:0	M:3	p:0.0472209	pcorr:0.0472209	RIPK1_MOUSEReceptor-interacting serine/threonine-protein kinase 1 OS=Mus musculus OX=10090 GN=Ripk1 PE=1 SV=1	Osclob_v00_mik.OX382158.1G629.1	TRINITY_DN5954_c0_g1_i4
1730873	F:0	M:3	p:0.0472209	pcorr:0.0472209	RIPK1_MOUSEReceptor-interacting serine/threonine-protein kinase 1 OS=Mus musculus OX=10090 GN=Ripk1 PE=1 SV=1	Osclob_v00_mik.OX382158.1G629.1	TRINITY_DN5954_c0_g1_i7
1730873	F:0	M:3	p:0.0472209	pcorr:0.0472209	RIPK1_MOUSEReceptor-interacting serine/threonine-protein kinase 1 OS=Mus musculus OX=10090 GN=Ripk1 PE=1 SV=1	Osclob_v00_mik.OX382158.1G629.1	TRINITY_DN5954_c0_g1_i6
1730873	F:0	M:3	p:0.0472209	pcorr:0.0472209	RIPK1_MOUSEReceptor-interacting serine/threonine-protein kinase 1 OS=Mus musculus OX=10090 GN=Ripk1 PE=1 SV=1	Osclob_v00_mik.OX382158.1G629.1	TRINITY_DN5954_c0_g1_i3
1732135	F:0	M:3	p:0.0472209	pcorr:0.0472209	-	*	TRINITY_DN21661_c2_g1_i1
1732135	F:0	M:3	p:0.0472209	pcorr:0.0472209	-	*	TRINITY_DN21661_c2_g1_i2
1732135	F:0	M:3	p:0.0472209	pcorr:0.0472209	-	*	TRINITY_DN21661_c2_g1_i3
1732135	F:0	M:3	p:0.0472209	pcorr:0.0472209	-	*	TRINITY_DN21661_c2_g1_i4
1732135	F:0	M:3	p:0.0472209	pcorr:0.0472209	-	Osclob_v00_mik.OX382167.1G417.1	TRINITY_DN75247_c0_g1_i5
1740685	F:0	M:3	p:0.0472209	pcorr:0.0472209	SNRPA_DROMEU1 small nuclear ribonucleoprotein A OS=Drosophila melanogaster OX=7227 GN=snf PE=1 SV=1	Osclob_v00_mik.OX382168.1G452.1	TRINITY_DN6080_c0_g1_i13
1740685	F:0	M:3	p:0.0472209	pcorr:0.0472209	SNRPA_DROMEU1 small nuclear ribonucleoprotein A OS=Drosophila melanogaster OX=7227 GN=snf PE=1 SV=1	Osclob_v00_mik.OX382168.1G452.1	TRINITY_DN6080_c0_g1_i11
1740685	F:0	M:3	p:0.0472209	pcorr:0.0472209	SNRPA_XENLAU1 small nuclear ribonucleoprotein A OS=Xenopus laevis OX=8355 GN=snrpa PE=2 SV=1	Osclob_v00_mik.OX382168.1G452.1	TRINITY_DN6080_c0_g1_i17
1740685	F:0	M:3	p:0.0472209	pcorr:0.0472209	SNRPA_DROMEU1 small nuclear ribonucleoprotein A OS=Drosophila melanogaster OX=7227 GN=snf PE=1 SV=1	Osclob_v00_mik.OX382168.1G452.1	TRINITY_DN6080_c0_g1_i14
1740685	F:0	M:3	p:0.0472209	pcorr:0.0472209	TM104_DROMETransmembrane protein 104 homolog OS=Drosophila melanogaster OX=7227 GN=CG5262 PE=2 SV=2	Osclob_v00_mik.OX382168.1G452.1	TRINITY_DN6080_c0_g1_i8
1744966	F:0	M:3	p:0.0472209	pcorr:0.0472209	-	Osclob_v00_mik.OX382159.1G30.1	TRINITY_DN20959_c0_g1_i1
1745932	F:0	M:3	p:0.0472209	pcorr:0.0472209	-	*	TRINITY_DN45813_c0_g1_i3
1745932	F:0	M:3	p:0.0472209	pcorr:0.0472209	-	*	TRINITY_DN45813_c0_g1_i9
1745932	F:0	M:3	p:0.0472209	pcorr:0.0472209	-	*	TRINITY_DN45813_c0_g1_i4
1746229	F:0	M:3	p:0.0472209	pcorr:0.0472209	-	Osclob_v00_mik.OX382154.1G784.1	TRINITY_DN24259_c0_g2_i2
1747923	F:0	M:3	p:0.0472209	pcorr:0.0472209	-	Osclob_v00_mik.OX382165.1G387.1	TRINITY_DN12537_c0_g1_i10
1747923	F:0	M:3	p:0.0472209	pcorr:0.0472209	-	Osclob_v00_mik.OX382165.1G387.1	TRINITY_DN12537_c0_g1_i10
1747923	F:0	M:3	p:0.0472209	pcorr:0.0472209	-	Osclob_v00_mik.OX382165.1G387.1	TRINITY_DN12537_c0_g1_i4
1747923	F:0	M:3	p:0.0472209	pcorr:0.0472209	-	Osclob_v00_mik.OX382165.1G387.1	TRINITY_DN12537_c0_g1_i4
1747923	F:0	M:3	p:0.0472209	pcorr:0.0472209	-	Osclob_v00_mik.OX382165.1G387.1	TRINITY_DN12537_c0_g1_i8
1747923	F:0	M:3	p:0.0472209	pcorr:0.0472209	-	Osclob_v00_mik.OX382165.1G387.1	TRINITY_DN12537_c0_g1_i8
1747923	F:0	M:3	p:0.0472209	pcorr:0.0472209	-	Osclob_v00_mik.OX382165.1G387.1	TRINITY_DN12537_c0_g1_i9
1747923	F:0	M:3	p:0.0472209	pcorr:0.0472209	-	Osclob_v00_mik.OX382165.1G387.1	TRINITY_DN12537_c0_g1_i9
1753723	F:0	M:3	p:0.0472209	pcorr:0.0472209	POL2_DROMERetrovirus-related Pol polyprotein from transposon 297 OS=Drosophila melanogaster OX=7227 GN=pol PE=4 SV=1	Osclob_v00_mik.OX382154.1G647.1	TRINITY_DN10701_c0_g1_i16
1753723	F:0	M:3	p:0.0472209	pcorr:0.0472209	POL2_DROMERetrovirus-related Pol polyprotein from transposon 297 OS=Drosophila melanogaster OX=7227 GN=pol PE=4 SV=1	Osclob_v00_mik.OX382154.1G647.1	TRINITY_DN10701_c0_g1_i2
1753723	F:0	M:3	p:0.0472209	pcorr:0.0472209	POL2_DROMERetrovirus-related Pol polyprotein from transposon 297 OS=Drosophila melanogaster OX=7227 GN=pol PE=4 SV=1	Osclob_v00_mik.OX382154.1G647.1	TRINITY_DN10701_c0_g1_i5
1753723	F:0	M:3	p:0.0472209	pcorr:0.0472209	POL2_DROMERetrovirus-related Pol polyprotein from transposon 297 OS=Drosophila melanogaster OX=7227 GN=pol PE=4 SV=1	Osclob_v00_mik.OX382154.1G647.1	TRINITY_DN10701_c0_g1_i6
1753723	F:0	M:3	p:0.0472209	pcorr:0.0472209	POL2_DROMERetrovirus-related Pol polyprotein from transposon 297 OS=Drosophila melanogaster OX=7227 GN=pol PE=4 SV=1	Osclob_v00_mik.OX382154.1G647.1	TRINITY_DN10701_c0_g1_i7
1768649	F:0	M:3	p:0.0472209	pcorr:0.0472209	-	*	TRINITY_DN13067_c1_g1_i13
1769883	F:0	M:3	p:0.0472209	pcorr:0.0472209	ATLA1_BOVINAtlastin-1 OS=Bos taurus OX=9913 GN=ATL1 PE=2 SV=2	Osclob_v00_mik.OX382156.1G378.1	TRINITY_DN3384_c0_g1_i2
1769883	F:0	M:3	p:0.0472209	pcorr:0.0472209	ATLA2_MACFAAtlastin-2 OS=Macaca fascicularis OX=9541 GN=ATL2 PE=2 SV=1	Osclob_v00_mik.OX382156.1G376.2	TRINITY_DN3384_c0_g1_i17
1769883	F:0	M:3	p:0.0472209	pcorr:0.0472209	ATLA2_HUMANAtlastin-2 OS=Homo sapiens OX=9606 GN=ATL2 PE=1 SV=2	Osclob_v00_mik.OX382156.1G378.1	TRINITY_DN3384_c0_g1_i3
1769883	F:0	M:3	p:0.0472209	pcorr:0.0472209	ATLA2_MACFAAtlastin-2 OS=Macaca fascicularis OX=9541 GN=ATL2 PE=2 SV=1	Osclob_v00_mik.OX382156.1G376.2	TRINITY_DN3384_c0_g1_i11
1769883	F:0	M:3	p:0.0472209	pcorr:0.0472209	ATLA2_MACFAAtlastin-2 OS=Macaca fascicularis OX=9541 GN=ATL2 PE=2 SV=1	Osclob_v00_mik.OX382156.1G376.2	TRINITY_DN3384_c0_g1_i16
1770920	F:0	M:3	p:0.0472209	pcorr:0.0472209	-	Osclob_v00_mik.OX382161.1G63.1	TRINITY_DN1109_c0_g1_i5
1770920	F:0	M:3	p:0.0472209	pcorr:0.0472209	-	Osclob_v00_mik.OX382161.1G63.1	TRINITY_DN1109_c0_g1_i7
1770920	F:0	M:3	p:0.0472209	pcorr:0.0472209	-	Osclob_v00_mik.OX382161.1G63.1	TRINITY_DN1109_c0_g1_i12
1770920	F:0	M:3	p:0.0472209	pcorr:0.0472209	-	Osclob_v00_mik.OX382161.1G63.1	TRINITY_DN1109_c0_g1_i6
1771397	F:0	M:3	p:0.0472209	pcorr:0.0472209	-	*	TRINITY_DN45813_c0_g1_i3
1771397	F:0	M:3	p:0.0472209	pcorr:0.0472209	-	*	TRINITY_DN45813_c0_g1_i9
1771397	F:0	M:3	p:0.0472209	pcorr:0.0472209	-	*	TRINITY_DN45813_c0_g1_i4
1775347	F:0	M:3	p:0.0472209	pcorr:0.0472209	-	Osclob_v00_mik.OX382165.1G456.1	TRINITY_DN14032_c0_g3_i2
1775347	F:0	M:3	p:0.0472209	pcorr:0.0472209	-	Osclob_v00_mik.OX382165.1G452.1	TRINITY_DN1993_c2_g1_i6
1775347	F:0	M:3	p:0.0472209	pcorr:0.0472209	-	Osclob_v00_mik.OX382165.1G454.1	TRINITY_DN1993_c2_g1_i14
1775347	F:0	M:3	p:0.0472209	pcorr:0.0472209	-	Osclob_v00_mik.OX382165.1G452.1	TRINITY_DN1993_c2_g1_i11
1775347	F:0	M:3	p:0.0472209	pcorr:0.0472209	-	Osclob_v00_mik.OX382165.1G452.1	TRINITY_DN1993_c2_g1_i7
1788823	F:0	M:3	p:0.0472209	pcorr:0.0472209	-	Osclob_v00_mik.OX382158.1G627.1	TRINITY_DN6259_c0_g1_i10
1788823	F:0	M:3	p:0.0472209	pcorr:0.0472209	-	Osclob_v00_mik.OX382158.1G627.1	TRINITY_DN6259_c0_g1_i1
1788823	F:0	M:3	p:0.0472209	pcorr:0.0472209	-	Osclob_v00_mik.OX382158.1G626.1	TRINITY_DN6259_c0_g1_i5
1788823	F:0	M:3	p:0.0472209	pcorr:0.0472209	-	Osclob_v00_mik.OX382158.1G626.1	TRINITY_DN6259_c0_g1_i12
1788823	F:0	M:3	p:0.0472209	pcorr:0.0472209	-	Osclob_v00_mik.OX382158.1G627.1	TRINITY_DN13582_c0_g1_i12
1795813	F:0	M:3	p:0.0472209	pcorr:0.0472209	BOC_MOUSEBrother of CDO OS=Mus musculus OX=10090 GN=Boc PE=1 SV=2	Osclob_v00_mik.OX382169.1G260.1	TRINITY_DN11128_c0_g1_i4
1795813	F:0	M:3	p:0.0472209	pcorr:0.0472209	BOC_MOUSEBrother of CDO OS=Mus musculus OX=10090 GN=Boc PE=1 SV=2	Osclob_v00_mik.OX382169.1G260.1	TRINITY_DN11128_c0_g1_i14
1795813	F:0	M:3	p:0.0472209	pcorr:0.0472209	BOC_MOUSEBrother of CDO OS=Mus musculus OX=10090 GN=Boc PE=1 SV=2	Osclob_v00_mik.OX382169.1G260.1	TRINITY_DN11128_c0_g1_i13
1795813	F:0	M:3	p:0.0472209	pcorr:0.0472209	BOC_MOUSEBrother of CDO OS=Mus musculus OX=10090 GN=Boc PE=1 SV=2	Osclob_v00_mik.OX382169.1G260.1	TRINITY_DN11128_c0_g1_i3
1795813	F:0	M:3	p:0.0472209	pcorr:0.0472209	BOC_MOUSEBrother of CDO OS=Mus musculus OX=10090 GN=Boc PE=1 SV=2	Osclob_v00_mik.OX382169.1G260.1	TRINITY_DN11128_c0_g1_i9
1800500	F:0	M:3	p:0.0472209	pcorr:0.0472209	YRD6_CAEELUncharacterized protein K02A2.6 OS=Caenorhabditis elegans OX=6239 GN=K02A2.6 PE=4 SV=1	Osclob_v00_mik.OX382151.1G1075.1	TRINITY_DN443_c0_g1_i12
1800500	F:0	M:3	p:0.0472209	pcorr:0.0472209	YRD6_CAEELUncharacterized protein K02A2.6 OS=Caenorhabditis elegans OX=6239 GN=K02A2.6 PE=4 SV=1	Osclob_v00_mik.OX382151.1G1075.1	TRINITY_DN443_c0_g1_i12
1800500	F:0	M:3	p:0.0472209	pcorr:0.0472209	YRD6_CAEELUncharacterized protein K02A2.6 OS=Caenorhabditis elegans OX=6239 GN=K02A2.6 PE=4 SV=1	Osclob_v00_mik.OX382154.1G650.1	TRINITY_DN443_c0_g1_i5
1800500	F:0	M:3	p:0.0472209	pcorr:0.0472209	YRD6_CAEELUncharacterized protein K02A2.6 OS=Caenorhabditis elegans OX=6239 GN=K02A2.6 PE=4 SV=1	Osclob_v00_mik.OX382151.1G1075.1	TRINITY_DN443_c0_g1_i1
1800500	F:0	M:3	p:0.0472209	pcorr:0.0472209	YRD6_CAEELUncharacterized protein K02A2.6 OS=Caenorhabditis elegans OX=6239 GN=K02A2.6 PE=4 SV=1	Osclob_v00_mik.OX382151.1G1075.1	TRINITY_DN443_c0_g1_i1
1806979	F:0	M:3	p:0.0472209	pcorr:0.0472209	-	Osclob_v00_mik.OX382158.1G760.1	TRINITY_DN10088_c1_g1_i4
1806979	F:0	M:3	p:0.0472209	pcorr:0.0472209	-	Osclob_v00_mik.OX382158.1G760.1	TRINITY_DN10088_c1_g1_i5
1806979	F:0	M:3	p:0.0472209	pcorr:0.0472209	-	Osclob_v00_mik.OX382158.1G759.1	TRINITY_DN10088_c1_g1_i11
1806979	F:0	M:3	p:0.0472209	pcorr:0.0472209	-	Osclob_v00_mik.OX382158.1G760.1	TRINITY_DN10088_c1_g1_i7
1806979	F:0	M:3	p:0.0472209	pcorr:0.0472209	-	Osclob_v00_mik.OX382158.1G760.1	TRINITY_DN10088_c1_g1_i17
1809298	F:0	M:3	p:0.0472209	pcorr:0.0472209	-	Osclob_v00_mik.OX382164.1G137.1	TRINITY_DN80323_c0_g1_i1
1809298	F:0	M:3	p:0.0472209	pcorr:0.0472209	RBGPR_MOUSERab3 GTPase-activating protein non-catalytic subunit OS=Mus musculus OX=10090 GN=Rab3gap2 PE=1 SV=2	Osclob_v00_mik.OX382164.1G137.1	TRINITY_DN154_c0_g1_i6
1809298	F:0	M:3	p:0.0472209	pcorr:0.0472209	RBGPR_MOUSERab3 GTPase-activating protein non-catalytic subunit OS=Mus musculus OX=10090 GN=Rab3gap2 PE=1 SV=2	Osclob_v00_mik.OX382164.1G137.1	TRINITY_DN154_c0_g1_i8
1809298	F:0	M:3	p:0.0472209	pcorr:0.0472209	RBGPR_MOUSERab3 GTPase-activating protein non-catalytic subunit OS=Mus musculus OX=10090 GN=Rab3gap2 PE=1 SV=2	Osclob_v00_mik.OX382164.1G137.1	TRINITY_DN154_c0_g1_i2
1809298	F:0	M:3	p:0.0472209	pcorr:0.0472209	RBGPR_MOUSERab3 GTPase-activating protein non-catalytic subunit OS=Mus musculus OX=10090 GN=Rab3gap2 PE=1 SV=2	Osclob_v00_mik.OX382164.1G137.1	TRINITY_DN154_c0_g1_i1
1813897	F:0	M:3	p:0.0472209	pcorr:0.0472209	-	Osclob_v00_mik.OX382165.1G387.1	TRINITY_DN12537_c0_g1_i10
1813897	F:0	M:3	p:0.0472209	pcorr:0.0472209	-	Osclob_v00_mik.OX382165.1G387.1	TRINITY_DN12537_c0_g1_i10
1813897	F:0	M:3	p:0.0472209	pcorr:0.0472209	-	Osclob_v00_mik.OX382165.1G387.1	TRINITY_DN12537_c0_g1_i4
1813897	F:0	M:3	p:0.0472209	pcorr:0.0472209	-	Osclob_v00_mik.OX382165.1G387.1	TRINITY_DN12537_c0_g1_i4
1813897	F:0	M:3	p:0.0472209	pcorr:0.0472209	-	Osclob_v00_mik.OX382165.1G387.1	TRINITY_DN12537_c0_g1_i8
1813897	F:0	M:3	p:0.0472209	pcorr:0.0472209	-	Osclob_v00_mik.OX382165.1G387.1	TRINITY_DN12537_c0_g1_i8
1813897	F:0	M:3	p:0.0472209	pcorr:0.0472209	-	Osclob_v00_mik.OX382165.1G387.1	TRINITY_DN12537_c0_g1_i9
1813897	F:0	M:3	p:0.0472209	pcorr:0.0472209	-	Osclob_v00_mik.OX382165.1G387.1	TRINITY_DN12537_c0_g1_i9
1817803	F:0	M:3	p:0.0472209	pcorr:0.0472209	COX1_METSECytochrome c oxidase subunit 1 OS=Metridium senile OX=6116 GN=COI PE=3 SV=1	*	TRINITY_DN7227_c0_g2_i4
1817803	F:0	M:3	p:0.0472209	pcorr:0.0472209	COX1_METSECytochrome c oxidase subunit 1 OS=Metridium senile OX=6116 GN=COI PE=3 SV=1	*	TRINITY_DN7227_c0_g2_i5
1817803	F:0	M:3	p:0.0472209	pcorr:0.0472209	COX1_METSECytochrome c oxidase subunit 1 OS=Metridium senile OX=6116 GN=COI PE=3 SV=1	Osclob_v00_mik.OX382150.1G2169.1	TRINITY_DN7227_c0_g2_i9
1817803	F:0	M:3	p:0.0472209	pcorr:0.0472209	COX1_METSECytochrome c oxidase subunit 1 OS=Metridium senile OX=6116 GN=COI PE=3 SV=1	Osclob_v00_mik.OX382161.1G328.1	TRINITY_DN7227_c0_g2_i14
1820506	F:0	M:3	p:0.0472209	pcorr:0.0472209	-	Osclob_v00_mik.OX382165.1G123.1	TRINITY_DN125491_c0_g1_i5
1820506	F:0	M:3	p:0.0472209	pcorr:0.0472209	-	Osclob_v00_mik.OX382162.1G356.1	TRINITY_DN125491_c0_g1_i2
1820506	F:0	M:3	p:0.0472209	pcorr:0.0472209	-	*	TRINITY_DN125491_c0_g2_i1
1823671	F:0	M:3	p:0.0472209	pcorr:0.0472209	XPO6A_XENLAExportin-6-A OS=Xenopus laevis OX=8355 GN=xpo6-a PE=1 SV=1	Osclob_v00_mik.OX382158.1G681.1	TRINITY_DN4305_c0_g1_i30
1823671	F:0	M:3	p:0.0472209	pcorr:0.0472209	PPA5_HUMANTartrate-resistant acid phosphatase type 5 OS=Homo sapiens OX=9606 GN=ACP5 PE=1 SV=3	Osclob_v00_mik.OX382158.1G681.1	TRINITY_DN4305_c0_g1_i35
1823671	F:0	M:3	p:0.0472209	pcorr:0.0472209	PPA5_HUMANTartrate-resistant acid phosphatase type 5 OS=Homo sapiens OX=9606 GN=ACP5 PE=1 SV=3	Osclob_v00_mik.OX382151.1G354.1	TRINITY_DN4305_c0_g1_i33
1823671	F:0	M:3	p:0.0472209	pcorr:0.0472209	PPA5_HUMANTartrate-resistant acid phosphatase type 5 OS=Homo sapiens OX=9606 GN=ACP5 PE=1 SV=3	Osclob_v00_mik.OX382151.1G354.1	TRINITY_DN4305_c0_g1_i12
1823671	F:0	M:3	p:0.0472209	pcorr:0.0472209	PPA5_HUMANTartrate-resistant acid phosphatase type 5 OS=Homo sapiens OX=9606 GN=ACP5 PE=1 SV=3	Osclob_v00_mik.OX382158.1G681.1	TRINITY_DN4305_c0_g1_i31
1826167	F:0	M:3	p:0.0472209	pcorr:0.0472209	CNTN6_MOUSEContactin-6 OS=Mus musculus OX=10090 GN=Cntn6 PE=1 SV=2	Osclob_v00_mik.OX382154.1G704.1	TRINITY_DN5779_c1_g1_i16
1826167	F:0	M:3	p:0.0472209	pcorr:0.0472209	CNTN6_MOUSEContactin-6 OS=Mus musculus OX=10090 GN=Cntn6 PE=1 SV=2	Osclob_v00_mik.OX382154.1G704.1	TRINITY_DN5779_c1_g1_i10
1826167	F:0	M:3	p:0.0472209	pcorr:0.0472209	CNTN6_MOUSEContactin-6 OS=Mus musculus OX=10090 GN=Cntn6 PE=1 SV=2	Osclob_v00_mik.OX382154.1G704.1	TRINITY_DN5779_c1_g1_i5
1826167	F:0	M:3	p:0.0472209	pcorr:0.0472209	CNTN6_MOUSEContactin-6 OS=Mus musculus OX=10090 GN=Cntn6 PE=1 SV=2	Osclob_v00_mik.OX382154.1G704.1	TRINITY_DN5779_c1_g1_i4
1826167	F:0	M:3	p:0.0472209	pcorr:0.0472209	CNTN6_MOUSEContactin-6 OS=Mus musculus OX=10090 GN=Cntn6 PE=1 SV=2	Osclob_v00_mik.OX382154.1G704.1	TRINITY_DN5779_c1_g1_i2
1848575	F:0	M:3	p:0.0472209	pcorr:0.0472209	-	Osclob_v00_mik.OX382151.1G112.1	TRINITY_DN7719_c0_g1_i7
1848575	F:0	M:3	p:0.0472209	pcorr:0.0472209	CE112_HUMANCentrosomal protein of 112 kDa OS=Homo sapiens OX=9606 GN=CEP112 PE=1 SV=2	Osclob_v00_mik.OX382151.1G112.1	TRINITY_DN7719_c0_g1_i8
1848575	F:0	M:3	p:0.0472209	pcorr:0.0472209	CE112_HUMANCentrosomal protein of 112 kDa OS=Homo sapiens OX=9606 GN=CEP112 PE=1 SV=2	Osclob_v00_mik.OX382151.1G112.1	TRINITY_DN7719_c0_g1_i29
1848575	F:0	M:3	p:0.0472209	pcorr:0.0472209	CE112_HUMANCentrosomal protein of 112 kDa OS=Homo sapiens OX=9606 GN=CEP112 PE=1 SV=2	Osclob_v00_mik.OX382151.1G112.1	TRINITY_DN7719_c0_g1_i24
1848575	F:0	M:3	p:0.0472209	pcorr:0.0472209	CE112_HUMANCentrosomal protein of 112 kDa OS=Homo sapiens OX=9606 GN=CEP112 PE=1 SV=2	Osclob_v00_mik.OX382151.1G112.1	TRINITY_DN7719_c0_g1_i6
1849314	F:0	M:3	p:0.0472209	pcorr:0.0472209	APC1_HUMANAnaphase-promoting complex subunit 1 OS=Homo sapiens OX=9606 GN=ANAPC1 PE=1 SV=1	Osclob_v00_mik.OX382151.1G123.1	TRINITY_DN2973_c0_g1_i7
1849314	F:0	M:3	p:0.0472209	pcorr:0.0472209	APC1_HUMANAnaphase-promoting complex subunit 1 OS=Homo sapiens OX=9606 GN=ANAPC1 PE=1 SV=1	Osclob_v00_mik.OX382151.1G123.1	TRINITY_DN2973_c0_g1_i7
1849314	F:0	M:3	p:0.0472209	pcorr:0.0472209	APC1_HUMANAnaphase-promoting complex subunit 1 OS=Homo sapiens OX=9606 GN=ANAPC1 PE=1 SV=1	Osclob_v00_mik.OX382151.1G123.1	TRINITY_DN2973_c0_g1_i3
1849314	F:0	M:3	p:0.0472209	pcorr:0.0472209	APC1_HUMANAnaphase-promoting complex subunit 1 OS=Homo sapiens OX=9606 GN=ANAPC1 PE=1 SV=1	Osclob_v00_mik.OX382151.1G123.1	TRINITY_DN2973_c0_g1_i3
1849314	F:0	M:3	p:0.0472209	pcorr:0.0472209	APC1_HUMANAnaphase-promoting complex subunit 1 OS=Homo sapiens OX=9606 GN=ANAPC1 PE=1 SV=1	Osclob_v00_mik.OX382151.1G123.1	TRINITY_DN2973_c0_g1_i8
1849314	F:0	M:3	p:0.0472209	pcorr:0.0472209	APC1_HUMANAnaphase-promoting complex subunit 1 OS=Homo sapiens OX=9606 GN=ANAPC1 PE=1 SV=1	Osclob_v00_mik.OX382151.1G123.1	TRINITY_DN2973_c0_g1_i8
1852279	F:0	M:3	p:0.0472209	pcorr:0.0472209	-	*	TRINITY_DN45813_c0_g1_i3
1852279	F:0	M:3	p:0.0472209	pcorr:0.0472209	-	*	TRINITY_DN45813_c0_g1_i9
1852279	F:0	M:3	p:0.0472209	pcorr:0.0472209	-	*	TRINITY_DN45813_c0_g1_i4
1854615	F:0	M:3	p:0.0472209	pcorr:0.0472209	-	Osclob_v00_mik.OX382158.1G239.1	TRINITY_DN23670_c0_g1_i11
1854615	F:0	M:3	p:0.0472209	pcorr:0.0472209	-	Osclob_v00_mik.OX382158.1G239.1	TRINITY_DN23670_c0_g1_i1
1854615	F:0	M:3	p:0.0472209	pcorr:0.0472209	-	Osclob_v00_mik.OX382158.1G239.1	TRINITY_DN23670_c0_g1_i2
1854615	F:0	M:3	p:0.0472209	pcorr:0.0472209	-	Osclob_v00_mik.OX382158.1G239.1	TRINITY_DN23670_c0_g1_i6
1854615	F:0	M:3	p:0.0472209	pcorr:0.0472209	-	Osclob_v00_mik.OX382158.1G239.1	TRINITY_DN23670_c0_g1_i3
1873428	F:0	M:3	p:0.0472209	pcorr:0.0472209	-	Osclob_v00_mik.OX382151.1G458.1	TRINITY_DN8503_c0_g1_i6
1873428	F:0	M:3	p:0.0472209	pcorr:0.0472209	-	Osclob_v00_mik.OX382151.1G458.1	TRINITY_DN8503_c0_g1_i5
1873428	F:0	M:3	p:0.0472209	pcorr:0.0472209	-	Osclob_v00_mik.OX382151.1G465.1	TRINITY_DN8503_c0_g1_i9
1873428	F:0	M:3	p:0.0472209	pcorr:0.0472209	-	Osclob_v00_mik.OX382151.1G458.1	TRINITY_DN8503_c0_g1_i14
1873428	F:0	M:3	p:0.0472209	pcorr:0.0472209	-	Osclob_v00_mik.OX382151.1G458.1	TRINITY_DN8503_c0_g1_i12
1878910	F:0	M:3	p:0.0472209	pcorr:0.0472209	TGFR1_RATTGF-beta receptor type-1 OS=Rattus norvegicus OX=10116 GN=Tgfbr1 PE=1 SV=1	Osclob_v00_mik.OX382157.1G90.2	TRINITY_DN3034_c0_g1_i3
1878910	F:0	M:3	p:0.0472209	pcorr:0.0472209	TGFR1_RATTGF-beta receptor type-1 OS=Rattus norvegicus OX=10116 GN=Tgfbr1 PE=1 SV=1	Osclob_v00_mik.OX382157.1G90.2	TRINITY_DN3034_c0_g1_i31
1878910	F:0	M:3	p:0.0472209	pcorr:0.0472209	TGFR1_RATTGF-beta receptor type-1 OS=Rattus norvegicus OX=10116 GN=Tgfbr1 PE=1 SV=1	Osclob_v00_mik.OX382157.1G90.2	TRINITY_DN3034_c0_g1_i26
1878910	F:0	M:3	p:0.0472209	pcorr:0.0472209	TGFR1_RATTGF-beta receptor type-1 OS=Rattus norvegicus OX=10116 GN=Tgfbr1 PE=1 SV=1	Osclob_v00_mik.OX382157.1G90.2	TRINITY_DN3034_c0_g1_i1
1878910	F:0	M:3	p:0.0472209	pcorr:0.0472209	TGFR1_RATTGF-beta receptor type-1 OS=Rattus norvegicus OX=10116 GN=Tgfbr1 PE=1 SV=1	Osclob_v00_mik.OX382157.1G90.2	TRINITY_DN3034_c0_g1_i23
1884636	F:0	M:3	p:0.0472209	pcorr:0.0472209	-	*	TRINITY_DN39659_c1_g1_i1
1907353	F:0	M:3	p:0.0472209	pcorr:0.0472209	-	*	TRINITY_DN91583_c1_g1_i1
1907353	F:0	M:3	p:0.0472209	pcorr:0.0472209	-	*	TRINITY_DN118143_c0_g1_i1
1911621	F:0	M:3	p:0.0472209	pcorr:0.0472209	-	Osclob_v00_mik.OX382158.1G321.1	TRINITY_DN13877_c0_g2_i5
1911621	F:0	M:3	p:0.0472209	pcorr:0.0472209	-	Osclob_v00_mik.OX382158.1G321.1	TRINITY_DN13877_c0_g2_i2
1911621	F:0	M:3	p:0.0472209	pcorr:0.0472209	-	Osclob_v00_mik.OX382158.1G321.1	TRINITY_DN13877_c0_g2_i6
1911621	F:0	M:3	p:0.0472209	pcorr:0.0472209	-	Osclob_v00_mik.OX382158.1G321.1	TRINITY_DN13877_c0_g2_i1
1911621	F:0	M:3	p:0.0472209	pcorr:0.0472209	-	Osclob_v00_mik.OX382158.1G320.1	TRINITY_DN13877_c0_g1_i2
1931185	F:0	M:3	p:0.0472209	pcorr:0.0472209	-	Osclob_v00_mik.OX382164.1G520.1	TRINITY_DN19749_c0_g1_i3
1931185	F:0	M:3	p:0.0472209	pcorr:0.0472209	-	Osclob_v00_mik.OX382164.1G520.1	TRINITY_DN19749_c0_g1_i1
1931185	F:0	M:3	p:0.0472209	pcorr:0.0472209	-	Osclob_v00_mik.OX382164.1G520.1	TRINITY_DN19749_c0_g1_i2
1931409	F:0	M:3	p:0.0472209	pcorr:0.0472209	XPOT_HUMANExportin-T OS=Homo sapiens OX=9606 GN=XPOT PE=1 SV=2	Osclob_v00_mik.OX382153.1G727.1	TRINITY_DN3594_c0_g1_i2
1931409	F:0	M:3	p:0.0472209	pcorr:0.0472209	XPOT_DANREExportin-T OS=Danio rerio OX=7955 GN=xpot PE=3 SV=1	Osclob_v00_mik.OX382153.1G726.1	TRINITY_DN3594_c0_g1_i10
1931409	F:0	M:3	p:0.0472209	pcorr:0.0472209	XPOT_HUMANExportin-T OS=Homo sapiens OX=9606 GN=XPOT PE=1 SV=2	Osclob_v00_mik.OX382153.1G740.1	TRINITY_DN3594_c0_g1_i7
1931409	F:0	M:3	p:0.0472209	pcorr:0.0472209	XPOT_HUMANExportin-T OS=Homo sapiens OX=9606 GN=XPOT PE=1 SV=2	Osclob_v00_mik.OX382153.1G740.1	TRINITY_DN3594_c0_g1_i4
1931409	F:0	M:3	p:0.0472209	pcorr:0.0472209	XPOT_HUMANExportin-T OS=Homo sapiens OX=9606 GN=XPOT PE=1 SV=2	Osclob_v00_mik.OX382153.1G727.1	TRINITY_DN3594_c0_g1_i9
1941932	F:0	M:3	p:0.0472209	pcorr:0.0472209	MLRP2_ACRMIMAM and LDL-receptor class A domain-containing protein 2 (Fragment) OS=Acropora millepora OX=45264 PE=1 SV=1	Osclob_v00_mik.OX382161.1G464.1	TRINITY_DN1601_c0_g1_i7
1941932	F:0	M:3	p:0.0472209	pcorr:0.0472209	MLRP2_ACRMIMAM and LDL-receptor class A domain-containing protein 2 (Fragment) OS=Acropora millepora OX=45264 PE=1 SV=1	Osclob_v00_mik.OX382161.1G464.1	TRINITY_DN1601_c0_g1_i4
1941932	F:0	M:3	p:0.0472209	pcorr:0.0472209	MLRP2_ACRMIMAM and LDL-receptor class A domain-containing protein 2 (Fragment) OS=Acropora millepora OX=45264 PE=1 SV=1	Osclob_v00_mik.OX382161.1G464.1	TRINITY_DN1601_c0_g1_i9
1941932	F:0	M:3	p:0.0472209	pcorr:0.0472209	MLRP2_ACRMIMAM and LDL-receptor class A domain-containing protein 2 (Fragment) OS=Acropora millepora OX=45264 PE=1 SV=1	Osclob_v00_mik.OX382161.1G464.1	TRINITY_DN1601_c0_g1_i2
1941932	F:0	M:3	p:0.0472209	pcorr:0.0472209	MLRP2_ACRMIMAM and LDL-receptor class A domain-containing protein 2 (Fragment) OS=Acropora millepora OX=45264 PE=1 SV=1	Osclob_v00_mik.OX382161.1G464.1	TRINITY_DN1601_c0_g1_i14
1949578	F:0	M:3	p:0.0472209	pcorr:0.0472209	CELR_CAEELCadherin EGF LAG seven-pass G-type receptor fmi-1 OS=Caenorhabditis elegans OX=6239 GN=fmi-1 PE=1 SV=1	Osclob_v00_mik.OX382167.1G286.1	TRINITY_DN15253_c0_g1_i3
1949578	F:0	M:3	p:0.0472209	pcorr:0.0472209	CELR_CAEELCadherin EGF LAG seven-pass G-type receptor fmi-1 OS=Caenorhabditis elegans OX=6239 GN=fmi-1 PE=1 SV=1	Osclob_v00_mik.OX382167.1G286.1	TRINITY_DN15253_c0_g1_i1
1949578	F:0	M:3	p:0.0472209	pcorr:0.0472209	FBP1_STRPUFibropellin-1 OS=Strongylocentrotus purpuratus OX=7668 GN=EGF1 PE=1 SV=2	Osclob_v00_mik.OX382167.1G419.1	TRINITY_DN1128_c0_g1_i6
1949578	F:0	M:3	p:0.0472209	pcorr:0.0472209	EYS_DANREProtein eyes shut homolog OS=Danio rerio OX=7955 GN=eys PE=1 SV=2	Osclob_v00_mik.OX382150.1G393.1	TRINITY_DN15253_c0_g1_i2
1949578	F:0	M:3	p:0.0472209	pcorr:0.0472209	DL_DROMENeurogenic locus protein delta OS=Drosophila melanogaster OX=7227 GN=Dl PE=1 SV=2	Osclob_v00_mik.OX382167.1G419.1	TRINITY_DN1128_c0_g1_i7
1956245	F:0	M:3	p:0.0472209	pcorr:0.0472209	AGRE5_BOVINAdhesion G protein-coupled receptor E5 OS=Bos taurus OX=9913 GN=ADGRE5 PE=2 SV=1	Osclob_v00_mik.OX382169.1G367.1	TRINITY_DN72_c0_g2_i6
1956245	F:0	M:3	p:0.0472209	pcorr:0.0472209	AGRE5_BOVINAdhesion G protein-coupled receptor E5 OS=Bos taurus OX=9913 GN=ADGRE5 PE=2 SV=1	Osclob_v00_mik.OX382169.1G367.1	TRINITY_DN72_c0_g2_i12
1956245	F:0	M:3	p:0.0472209	pcorr:0.0472209	AGRE5_BOVINAdhesion G protein-coupled receptor E5 OS=Bos taurus OX=9913 GN=ADGRE5 PE=2 SV=1	Osclob_v00_mik.OX382169.1G367.1	TRINITY_DN72_c0_g2_i4
1956245	F:0	M:3	p:0.0472209	pcorr:0.0472209	AGRE5_BOVINAdhesion G protein-coupled receptor E5 OS=Bos taurus OX=9913 GN=ADGRE5 PE=2 SV=1	Osclob_v00_mik.OX382169.1G367.1	TRINITY_DN72_c0_g2_i7
1956245	F:0	M:3	p:0.0472209	pcorr:0.0472209	AGRE5_BOVINAdhesion G protein-coupled receptor E5 OS=Bos taurus OX=9913 GN=ADGRE5 PE=2 SV=1	Osclob_v00_mik.OX382169.1G367.1	TRINITY_DN72_c0_g2_i1
1959340	F:0	M:3	p:0.0472209	pcorr:0.0472209	TLL1_DANREDorsal-ventral patterning tolloid-like protein 1 OS=Danio rerio OX=7955 GN=tll1 PE=2 SV=1	Osclob_v00_mik.OX382156.1G575.1	TRINITY_DN1143_c0_g1_i9
1959340	F:0	M:3	p:0.0472209	pcorr:0.0472209	KPTN_MOUSEKICSTOR complex protein kaptin OS=Mus musculus OX=10090 GN=Kptn PE=2 SV=1	Osclob_v00_mik.OX382156.1G881.1	TRINITY_DN1143_c0_g1_i11
1959340	F:0	M:3	p:0.0472209	pcorr:0.0472209	TLL1_DANREDorsal-ventral patterning tolloid-like protein 1 OS=Danio rerio OX=7955 GN=tll1 PE=2 SV=1	Osclob_v00_mik.OX382156.1G575.1	TRINITY_DN1143_c0_g1_i10
1959340	F:0	M:3	p:0.0472209	pcorr:0.0472209	KPTN_MOUSEKICSTOR complex protein kaptin OS=Mus musculus OX=10090 GN=Kptn PE=2 SV=1	Osclob_v00_mik.OX382156.1G881.1	TRINITY_DN1143_c0_g1_i6
1959340	F:0	M:3	p:0.0472209	pcorr:0.0472209	TLL1_DANREDorsal-ventral patterning tolloid-like protein 1 OS=Danio rerio OX=7955 GN=tll1 PE=2 SV=1	Osclob_v00_mik.OX382156.1G575.1	TRINITY_DN1143_c0_g1_i2
1976365	F:0	M:3	p:0.0472209	pcorr:0.0472209	-	Osclob_v00_mik.OX382167.1G454.1	TRINITY_DN151679_c0_g1_i1
1982627	F:0	M:3	p:0.0472209	pcorr:0.0472209	CTHR1_HUMANCollagen triple helix repeat-containing protein 1 OS=Homo sapiens OX=9606 GN=CTHRC1 PE=1 SV=1	Osclob_v00_mik.OX382158.1G335.1	TRINITY_DN820_c1_g2_i2
1982627	F:0	M:3	p:0.0472209	pcorr:0.0472209	CTHR1_HUMANCollagen triple helix repeat-containing protein 1 OS=Homo sapiens OX=9606 GN=CTHRC1 PE=1 SV=1	Osclob_v00_mik.OX382158.1G378.1	TRINITY_DN24449_c0_g1_i2
1982627	F:0	M:3	p:0.0472209	pcorr:0.0472209	CTHR1_HUMANCollagen triple helix repeat-containing protein 1 OS=Homo sapiens OX=9606 GN=CTHRC1 PE=1 SV=1	Osclob_v00_mik.OX382158.1G378.1	TRINITY_DN24449_c0_g1_i1
1982627	F:0	M:3	p:0.0472209	pcorr:0.0472209	CTHR1_HUMANCollagen triple helix repeat-containing protein 1 OS=Homo sapiens OX=9606 GN=CTHRC1 PE=1 SV=1	Osclob_v00_mik.OX382158.1G378.1	TRINITY_DN24449_c0_g1_i6
1982627	F:0	M:3	p:0.0472209	pcorr:0.0472209	CTHR1_HUMANCollagen triple helix repeat-containing protein 1 OS=Homo sapiens OX=9606 GN=CTHRC1 PE=1 SV=1	Osclob_v00_mik.OX382158.1G378.1	TRINITY_DN24449_c0_g1_i16
1983876	F:0	M:3	p:0.0472209	pcorr:0.0472209	-	Osclob_v00_mik.OX382157.1G562.1	TRINITY_DN6614_c0_g1_i4
1983876	F:0	M:3	p:0.0472209	pcorr:0.0472209	-	Osclob_v00_mik.OX382157.1G562.1	TRINITY_DN6614_c0_g1_i5
1983876	F:0	M:3	p:0.0472209	pcorr:0.0472209	-	Osclob_v00_mik.OX382157.1G562.1	TRINITY_DN6614_c0_g1_i1
1983876	F:0	M:3	p:0.0472209	pcorr:0.0472209	-	Osclob_v00_mik.OX382157.1G562.1	TRINITY_DN6614_c0_g1_i3
1983876	F:0	M:3	p:0.0472209	pcorr:0.0472209	-	Osclob_v00_mik.OX382157.1G562.1	TRINITY_DN6614_c0_g1_i6
1986757	F:0	M:3	p:0.0472209	pcorr:0.0472209	-	Osclob_v00_mik.OX382163.1G113.1	TRINITY_DN52221_c0_g1_i10
1986757	F:0	M:3	p:0.0472209	pcorr:0.0472209	-	Osclob_v00_mik.OX382150.1G1578.1	TRINITY_DN52221_c0_g1_i12
1986757	F:0	M:3	p:0.0472209	pcorr:0.0472209	-	Osclob_v00_mik.OX382150.1G1578.1	TRINITY_DN52221_c0_g1_i2
1986757	F:0	M:3	p:0.0472209	pcorr:0.0472209	-	Osclob_v00_mik.OX382150.1G1578.1	TRINITY_DN52221_c0_g1_i7
1986757	F:0	M:3	p:0.0472209	pcorr:0.0472209	-	Osclob_v00_mik.OX382163.1G113.1	TRINITY_DN52221_c0_g1_i6
1992424	F:0	M:3	p:0.0472209	pcorr:0.0472209	MRC1_MOUSEMacrophage mannose receptor 1 OS=Mus musculus OX=10090 GN=Mrc1 PE=1 SV=2	Osclob_v00_mik.OX382168.1G33.1	TRINITY_DN7391_c0_g2_i5
1992424	F:0	M:3	p:0.0472209	pcorr:0.0472209	MRC1_HUMANMacrophage mannose receptor 1 OS=Homo sapiens OX=9606 GN=MRC1 PE=1 SV=1	Osclob_v00_mik.OX382168.1G29.1	TRINITY_DN7391_c0_g2_i4
1992424	F:0	M:3	p:0.0472209	pcorr:0.0472209	SLB_PHIOLSnaclec subunit B OS=Philodryas olfersii OX=120305 PE=2 SV=1	Osclob_v00_mik.OX382168.1G33.1	TRINITY_DN18008_c0_g1_i2
1992424	F:0	M:3	p:0.0472209	pcorr:0.0472209	SLB_PHIOLSnaclec subunit B OS=Philodryas olfersii OX=120305 PE=2 SV=1	Osclob_v00_mik.OX382168.1G22.1	TRINITY_DN18008_c0_g1_i9
1992424	F:0	M:3	p:0.0472209	pcorr:0.0472209	MRC1_HUMANMacrophage mannose receptor 1 OS=Homo sapiens OX=9606 GN=MRC1 PE=1 SV=1	Osclob_v00_mik.OX382168.1G23.2	TRINITY_DN7391_c0_g2_i2
1995771	F:0	M:3	p:0.0472209	pcorr:0.0472209	PTPRQ_MOUSEPhosphatidylinositol phosphatase PTPRQ OS=Mus musculus OX=10090 GN=Ptprq PE=1 SV=1	Osclob_v00_mik.OX382157.1G678.1	TRINITY_DN5457_c0_g1_i5
1995771	F:0	M:3	p:0.0472209	pcorr:0.0472209	PTPRQ_MOUSEPhosphatidylinositol phosphatase PTPRQ OS=Mus musculus OX=10090 GN=Ptprq PE=1 SV=1	Osclob_v00_mik.OX382157.1G678.1	TRINITY_DN5457_c0_g1_i17
1995771	F:0	M:3	p:0.0472209	pcorr:0.0472209	PTPRQ_MOUSEPhosphatidylinositol phosphatase PTPRQ OS=Mus musculus OX=10090 GN=Ptprq PE=1 SV=1	Osclob_v00_mik.OX382157.1G678.1	TRINITY_DN5457_c0_g1_i2
1995771	F:0	M:3	p:0.0472209	pcorr:0.0472209	ROBO2_HUMANRoundabout homolog 2 OS=Homo sapiens OX=9606 GN=ROBO2 PE=1 SV=2	Osclob_v00_mik.OX382157.1G678.1	TRINITY_DN86841_c0_g1_i1
1995771	F:0	M:3	p:0.0472209	pcorr:0.0472209	PTPRS_MOUSEReceptor-type tyrosine-protein phosphatase S OS=Mus musculus OX=10090 GN=Ptprs PE=1 SV=1	Osclob_v00_mik.OX382157.1G678.1	TRINITY_DN64821_c0_g1_i2
1999919	F:0	M:3	p:0.0472209	pcorr:0.0472209	-	Osclob_v00_mik.OX382168.1G20.1	TRINITY_DN9541_c0_g1_i12
1999919	F:0	M:3	p:0.0472209	pcorr:0.0472209	-	Osclob_v00_mik.OX382168.1G20.1	TRINITY_DN781_c0_g2_i6
1999919	F:0	M:3	p:0.0472209	pcorr:0.0472209	-	Osclob_v00_mik.OX382168.1G20.1	TRINITY_DN781_c0_g2_i2
1999919	F:0	M:3	p:0.0472209	pcorr:0.0472209	-	Osclob_v00_mik.OX382168.1G20.1	TRINITY_DN781_c0_g2_i1
1999919	F:0	M:3	p:0.0472209	pcorr:0.0472209	-	Osclob_v00_mik.OX382168.1G20.1	TRINITY_DN9541_c0_g1_i1
2010655	F:0	M:3	p:0.0472209	pcorr:0.0472209	RGPA1_HUMANRal GTPase-activating protein subunit alpha-1 OS=Homo sapiens OX=9606 GN=RALGAPA1 PE=1 SV=1	Osclob_v00_mik.OX382156.1G429.1	TRINITY_DN2690_c0_g2_i1
2010655	F:0	M:3	p:0.0472209	pcorr:0.0472209	RGPA1_HUMANRal GTPase-activating protein subunit alpha-1 OS=Homo sapiens OX=9606 GN=RALGAPA1 PE=1 SV=1	Osclob_v00_mik.OX382156.1G429.1	TRINITY_DN2690_c0_g2_i2
2011471	F:0	M:3	p:0.0472209	pcorr:0.0472209	LZIC_MOUSEProtein LZIC OS=Mus musculus OX=10090 GN=Lzic PE=1 SV=1	Osclob_v00_mik.OX382165.1G456.1	TRINITY_DN1993_c0_g1_i9
2011471	F:0	M:3	p:0.0472209	pcorr:0.0472209	LZIC_MOUSEProtein LZIC OS=Mus musculus OX=10090 GN=Lzic PE=1 SV=1	Osclob_v00_mik.OX382165.1G456.1	TRINITY_DN1993_c0_g1_i9
2011471	F:0	M:3	p:0.0472209	pcorr:0.0472209	LZIC_MOUSEProtein LZIC OS=Mus musculus OX=10090 GN=Lzic PE=1 SV=1	Osclob_v00_mik.OX382165.1G456.1	TRINITY_DN1993_c0_g1_i1
2011471	F:0	M:3	p:0.0472209	pcorr:0.0472209	LZIC_MOUSEProtein LZIC OS=Mus musculus OX=10090 GN=Lzic PE=1 SV=1	Osclob_v00_mik.OX382165.1G456.1	TRINITY_DN1993_c0_g1_i1
2011471	F:0	M:3	p:0.0472209	pcorr:0.0472209	LZIC_MOUSEProtein LZIC OS=Mus musculus OX=10090 GN=Lzic PE=1 SV=1	Osclob_v00_mik.OX382165.1G456.1	TRINITY_DN1993_c0_g1_i5
2011471	F:0	M:3	p:0.0472209	pcorr:0.0472209	LZIC_MOUSEProtein LZIC OS=Mus musculus OX=10090 GN=Lzic PE=1 SV=1	Osclob_v00_mik.OX382165.1G456.1	TRINITY_DN1993_c0_g1_i5
2011471	F:0	M:3	p:0.0472209	pcorr:0.0472209	LZIC_MOUSEProtein LZIC OS=Mus musculus OX=10090 GN=Lzic PE=1 SV=1	Osclob_v00_mik.OX382165.1G456.1	TRINITY_DN1993_c0_g1_i6
2011471	F:0	M:3	p:0.0472209	pcorr:0.0472209	LZIC_MOUSEProtein LZIC OS=Mus musculus OX=10090 GN=Lzic PE=1 SV=1	Osclob_v00_mik.OX382165.1G456.1	TRINITY_DN1993_c0_g1_i6
2011471	F:0	M:3	p:0.0472209	pcorr:0.0472209	LZIC_MOUSEProtein LZIC OS=Mus musculus OX=10090 GN=Lzic PE=1 SV=1	Osclob_v00_mik.OX382165.1G456.1	TRINITY_DN1993_c0_g1_i7
2011471	F:0	M:3	p:0.0472209	pcorr:0.0472209	LZIC_MOUSEProtein LZIC OS=Mus musculus OX=10090 GN=Lzic PE=1 SV=1	Osclob_v00_mik.OX382165.1G456.1	TRINITY_DN1993_c0_g1_i7
2013230	F:0	M:3	p:0.0472209	pcorr:0.0472209	-	Osclob_v00_mik.OX382154.1G641.1	TRINITY_DN116780_c0_g1_i1
2026407	F:0	M:3	p:0.0472209	pcorr:0.0472209	-	Osclob_v00_mik.OX382162.1G596.1	TRINITY_DN22639_c0_g1_i1
2026407	F:0	M:3	p:0.0472209	pcorr:0.0472209	CY561_BOVINTransmembrane ascorbate-dependent reductase CYB561 OS=Bos taurus OX=9913 GN=CYB561 PE=1 SV=2	Osclob_v00_mik.OX382162.1G596.1	TRINITY_DN1732_c0_g1_i3
2026407	F:0	M:3	p:0.0472209	pcorr:0.0472209	CY561_SHEEPTransmembrane ascorbate-dependent reductase CYB561 OS=Ovis aries OX=9940 GN=CYB561 PE=2 SV=1	Osclob_v00_mik.OX382162.1G596.1	TRINITY_DN1732_c0_g1_i8
2026407	F:0	M:3	p:0.0472209	pcorr:0.0472209	CY561_BOVINTransmembrane ascorbate-dependent reductase CYB561 OS=Bos taurus OX=9913 GN=CYB561 PE=1 SV=2	Osclob_v00_mik.OX382162.1G596.1	TRINITY_DN1732_c0_g1_i1
2026407	F:0	M:3	p:0.0472209	pcorr:0.0472209	CY561_BOVINTransmembrane ascorbate-dependent reductase CYB561 OS=Bos taurus OX=9913 GN=CYB561 PE=1 SV=2	Osclob_v00_mik.OX382162.1G596.1	TRINITY_DN1732_c0_g1_i6
2026595	F:0	M:3	p:0.0472209	pcorr:0.0472209	-	Osclob_v00_mik.OX382167.1G527.1	TRINITY_DN14324_c0_g1_i2
2026595	F:0	M:3	p:0.0472209	pcorr:0.0472209	-	Osclob_v00_mik.OX382156.1G356.1	TRINITY_DN14324_c0_g1_i3
2027128	F:0	M:3	p:0.0472209	pcorr:0.0472209	PKHL1_HUMANFibrocystin-L OS=Homo sapiens OX=9606 GN=PKHD1L1 PE=2 SV=2	Osclob_v00_mik.OX382163.1G279.1	TRINITY_DN56_c2_g1_i5
2027128	F:0	M:3	p:0.0472209	pcorr:0.0472209	PKHL1_HUMANFibrocystin-L OS=Homo sapiens OX=9606 GN=PKHD1L1 PE=2 SV=2	Osclob_v00_mik.OX382163.1G375.2	TRINITY_DN56_c2_g1_i17
2027128	F:0	M:3	p:0.0472209	pcorr:0.0472209	PKHL1_HUMANFibrocystin-L OS=Homo sapiens OX=9606 GN=PKHD1L1 PE=2 SV=2	Osclob_v00_mik.OX382163.1G279.1	TRINITY_DN56_c2_g1_i4
2028402	F:0	M:3	p:0.0472209	pcorr:0.0472209	-	Osclob_v00_mik.OX382161.1G598.2	TRINITY_DN10036_c0_g1_i19
2028402	F:0	M:3	p:0.0472209	pcorr:0.0472209	-	Osclob_v00_mik.OX382161.1G666.1	TRINITY_DN10036_c0_g1_i13
2028402	F:0	M:3	p:0.0472209	pcorr:0.0472209	LRRK2_MOUSELeucine-rich repeat serine/threonine-protein kinase 2 OS=Mus musculus OX=10090 GN=Lrrk2 PE=1 SV=2	Osclob_v00_mik.OX382161.1G669.1	TRINITY_DN11295_c0_g1_i12
2028402	F:0	M:3	p:0.0472209	pcorr:0.0472209	LRRK2_MOUSELeucine-rich repeat serine/threonine-protein kinase 2 OS=Mus musculus OX=10090 GN=Lrrk2 PE=1 SV=2	Osclob_v00_mik.OX382161.1G584.2	TRINITY_DN54170_c0_g3_i3
2028402	F:0	M:3	p:0.0472209	pcorr:0.0472209	LRRK2_MOUSELeucine-rich repeat serine/threonine-protein kinase 2 OS=Mus musculus OX=10090 GN=Lrrk2 PE=1 SV=2	Osclob_v00_mik.OX382161.1G665.1	TRINITY_DN54170_c0_g3_i1
2046187	F:0	M:3	p:0.0472209	pcorr:0.0472209	TSP2_CHICKThrombospondin-2 OS=Gallus gallus OX=9031 GN=THBS2 PE=2 SV=1	Osclob_v00_mik.OX382163.1G245.1	TRINITY_DN5839_c0_g1_i7
2046187	F:0	M:3	p:0.0472209	pcorr:0.0472209	TSP2_CHICKThrombospondin-2 OS=Gallus gallus OX=9031 GN=THBS2 PE=2 SV=1	Osclob_v00_mik.OX382163.1G245.1	TRINITY_DN5839_c0_g1_i7
2046187	F:0	M:3	p:0.0472209	pcorr:0.0472209	TSP2_CHICKThrombospondin-2 OS=Gallus gallus OX=9031 GN=THBS2 PE=2 SV=1	Osclob_v00_mik.OX382163.1G245.1	TRINITY_DN5839_c0_g1_i9
2046187	F:0	M:3	p:0.0472209	pcorr:0.0472209	TSP2_CHICKThrombospondin-2 OS=Gallus gallus OX=9031 GN=THBS2 PE=2 SV=1	Osclob_v00_mik.OX382163.1G245.1	TRINITY_DN5839_c0_g1_i9
2046187	F:0	M:3	p:0.0472209	pcorr:0.0472209	TSP2_CHICKThrombospondin-2 OS=Gallus gallus OX=9031 GN=THBS2 PE=2 SV=1	Osclob_v00_mik.OX382163.1G245.1	TRINITY_DN5839_c0_g1_i8
2046187	F:0	M:3	p:0.0472209	pcorr:0.0472209	TSP2_CHICKThrombospondin-2 OS=Gallus gallus OX=9031 GN=THBS2 PE=2 SV=1	Osclob_v00_mik.OX382163.1G245.1	TRINITY_DN5839_c0_g1_i8
2046187	F:0	M:3	p:0.0472209	pcorr:0.0472209	TSP2_CHICKThrombospondin-2 OS=Gallus gallus OX=9031 GN=THBS2 PE=2 SV=1	Osclob_v00_mik.OX382163.1G245.1	TRINITY_DN5839_c0_g1_i4
2046187	F:0	M:3	p:0.0472209	pcorr:0.0472209	TSP2_CHICKThrombospondin-2 OS=Gallus gallus OX=9031 GN=THBS2 PE=2 SV=1	Osclob_v00_mik.OX382163.1G245.1	TRINITY_DN5839_c0_g1_i4
2046187	F:0	M:3	p:0.0472209	pcorr:0.0472209	TSP2_CHICKThrombospondin-2 OS=Gallus gallus OX=9031 GN=THBS2 PE=2 SV=1	Osclob_v00_mik.OX382163.1G245.1	TRINITY_DN5839_c0_g1_i17
2046187	F:0	M:3	p:0.0472209	pcorr:0.0472209	TSP2_CHICKThrombospondin-2 OS=Gallus gallus OX=9031 GN=THBS2 PE=2 SV=1	Osclob_v00_mik.OX382163.1G245.1	TRINITY_DN5839_c0_g1_i17
2056155	F:0	M:3	p:0.0472209	pcorr:0.0472209	-	*	TRINITY_DN170577_c0_g1_i1
2075649	F:0	M:3	p:0.0472209	pcorr:0.0472209	-	Osclob_v00_mik.OX382159.1G668.1	TRINITY_DN14564_c0_g1_i8
2075649	F:0	M:3	p:0.0472209	pcorr:0.0472209	KLD8A_HUMANKelch domain-containing protein 8A OS=Homo sapiens OX=9606 GN=KLHDC8A PE=1 SV=2	Osclob_v00_mik.OX382159.1G668.1	TRINITY_DN14564_c0_g1_i5
2075649	F:0	M:3	p:0.0472209	pcorr:0.0472209	KLD8A_HUMANKelch domain-containing protein 8A OS=Homo sapiens OX=9606 GN=KLHDC8A PE=1 SV=2	Osclob_v00_mik.OX382159.1G668.1	TRINITY_DN14564_c0_g1_i6
2075649	F:0	M:3	p:0.0472209	pcorr:0.0472209	KLH38_DANREKelch-like protein 38 OS=Danio rerio OX=7955 GN=klhl38 PE=4 SV=1	Osclob_v00_mik.OX382159.1G668.1	TRINITY_DN14564_c0_g1_i1
2081637	F:0	M:3	p:0.0472209	pcorr:0.0472209	-	Osclob_v00_mik.OX382159.1G323.1	TRINITY_DN255_c0_g1_i10
2081637	F:0	M:3	p:0.0472209	pcorr:0.0472209	OSTF1_RATOsteoclast-stimulating factor 1 OS=Rattus norvegicus OX=10116 GN=Ostf1 PE=1 SV=1	Osclob_v00_mik.OX382159.1G328.1	TRINITY_DN255_c0_g1_i7
2081637	F:0	M:3	p:0.0472209	pcorr:0.0472209	OSTF1_RATOsteoclast-stimulating factor 1 OS=Rattus norvegicus OX=10116 GN=Ostf1 PE=1 SV=1	Osclob_v00_mik.OX382159.1G328.1	TRINITY_DN255_c0_g1_i3
2081637	F:0	M:3	p:0.0472209	pcorr:0.0472209	-	Osclob_v00_mik.OX382159.1G323.1	TRINITY_DN255_c0_g1_i2
2081637	F:0	M:3	p:0.0472209	pcorr:0.0472209	OSTF1_BOVINOsteoclast-stimulating factor 1 OS=Bos taurus OX=9913 GN=OSTF1 PE=2 SV=1	Osclob_v00_mik.OX382159.1G323.1	TRINITY_DN255_c0_g1_i5
2087741	F:0	M:3	p:0.0472209	pcorr:0.0472209	-	Osclob_v00_mik.OX382168.1G163.1	TRINITY_DN23550_c0_g1_i2
2087741	F:0	M:3	p:0.0472209	pcorr:0.0472209	-	Osclob_v00_mik.OX382168.1G163.1	TRINITY_DN23550_c0_g1_i8
2087741	F:0	M:3	p:0.0472209	pcorr:0.0472209	-	Osclob_v00_mik.OX382168.1G163.1	TRINITY_DN23550_c0_g1_i6
2087741	F:0	M:3	p:0.0472209	pcorr:0.0472209	-	Osclob_v00_mik.OX382168.1G163.1	TRINITY_DN23550_c0_g1_i4
2087741	F:0	M:3	p:0.0472209	pcorr:0.0472209	-	Osclob_v00_mik.OX382168.1G163.1	TRINITY_DN23550_c0_g1_i3
2094619	F:0	M:3	p:0.0472209	pcorr:0.0472209	WDR48_MOUSEWD repeat-containing protein 48 OS=Mus musculus OX=10090 GN=Wdr48 PE=1 SV=1	Osclob_v00_mik.OX382167.1G41.1	TRINITY_DN2211_c0_g1_i15
2094619	F:0	M:3	p:0.0472209	pcorr:0.0472209	WDR48_CAEBRWD repeat-containing protein 48 homolog OS=Caenorhabditis briggsae OX=6238 GN=wdr-48 PE=3 SV=3	Osclob_v00_mik.OX382167.1G41.1	TRINITY_DN2211_c0_g1_i13
2094619	F:0	M:3	p:0.0472209	pcorr:0.0472209	WDR48_MOUSEWD repeat-containing protein 48 OS=Mus musculus OX=10090 GN=Wdr48 PE=1 SV=1	Osclob_v00_mik.OX382167.1G41.3	TRINITY_DN2211_c0_g1_i25
2094619	F:0	M:3	p:0.0472209	pcorr:0.0472209	WDR48_HUMANWD repeat-containing protein 48 OS=Homo sapiens OX=9606 GN=WDR48 PE=1 SV=1	Osclob_v00_mik.OX382167.1G41.2	TRINITY_DN2211_c0_g1_i5
2094619	F:0	M:3	p:0.0472209	pcorr:0.0472209	WDR48_HUMANWD repeat-containing protein 48 OS=Homo sapiens OX=9606 GN=WDR48 PE=1 SV=1	Osclob_v00_mik.OX382167.1G41.3	TRINITY_DN2211_c0_g1_i6
2117311	F:0	M:3	p:0.0472209	pcorr:0.0472209	-	Osclob_v00_mik.OX382158.1G335.1	TRINITY_DN25315_c0_g1_i3
2117311	F:0	M:3	p:0.0472209	pcorr:0.0472209	-	Osclob_v00_mik.OX382158.1G335.1	TRINITY_DN25315_c0_g1_i2
2117311	F:0	M:3	p:0.0472209	pcorr:0.0472209	-	Osclob_v00_mik.OX382158.1G335.1	TRINITY_DN25315_c0_g1_i1
2117311	F:0	M:3	p:0.0472209	pcorr:0.0472209	-	Osclob_v00_mik.OX382158.1G335.1	TRINITY_DN25315_c0_g1_i5
2117311	F:0	M:3	p:0.0472209	pcorr:0.0472209	-	Osclob_v00_mik.OX382158.1G335.1	TRINITY_DN25315_c0_g1_i7
2117438	F:0	M:3	p:0.0472209	pcorr:0.0472209	KI21A_MOUSEKinesin-like protein KIF21A OS=Mus musculus OX=10090 GN=Kif21a PE=1 SV=2	Osclob_v00_mik.OX382168.1G384.1	TRINITY_DN7488_c1_g2_i4
2117438	F:0	M:3	p:0.0472209	pcorr:0.0472209	KI21B_RATKinesin-like protein KIF21B OS=Rattus norvegicus OX=10116 GN=Kif21b PE=1 SV=2	Osclob_v00_mik.OX382168.1G384.1	TRINITY_DN7488_c1_g2_i1
2117438	F:0	M:3	p:0.0472209	pcorr:0.0472209	KI21A_MOUSEKinesin-like protein KIF21A OS=Mus musculus OX=10090 GN=Kif21a PE=1 SV=2	Osclob_v00_mik.OX382168.1G384.1	TRINITY_DN7488_c1_g2_i2
2119807	F:0	M:3	p:0.0472209	pcorr:0.0472209	-	*	TRINITY_DN4591_c2_g1_i2
2119807	F:0	M:3	p:0.0472209	pcorr:0.0472209	BIN3D_CAEELProbable RNA methyltransferase Y17G7B.18 OS=Caenorhabditis elegans OX=6239 GN=Y17G7B.18 PE=3 SV=1	Osclob_v00_mik.OX382152.1G260.1	TRINITY_DN6245_c0_g2_i2
2119807	F:0	M:3	p:0.0472209	pcorr:0.0472209	BIN3D_CAEELProbable RNA methyltransferase Y17G7B.18 OS=Caenorhabditis elegans OX=6239 GN=Y17G7B.18 PE=3 SV=1	Osclob_v00_mik.OX382152.1G260.1	TRINITY_DN6245_c0_g2_i7
2119807	F:0	M:3	p:0.0472209	pcorr:0.0472209	BIN3D_CAEELProbable RNA methyltransferase Y17G7B.18 OS=Caenorhabditis elegans OX=6239 GN=Y17G7B.18 PE=3 SV=1	Osclob_v00_mik.OX382152.1G260.1	TRINITY_DN6245_c0_g2_i5
2119807	F:0	M:3	p:0.0472209	pcorr:0.0472209	POL3_DROMERetrovirus-related Pol polyprotein from transposon 17.6 OS=Drosophila melanogaster OX=7227 GN=pol PE=4 SV=1	Osclob_v00_mik.OX382160.1G621.1	TRINITY_DN5058_c0_g1_i4
2122748	F:0	M:3	p:0.0472209	pcorr:0.0472209	-	Osclob_v00_mik.OX382150.1G211.1	TRINITY_DN2936_c0_g1_i7
2122748	F:0	M:3	p:0.0472209	pcorr:0.0472209	-	Osclob_v00_mik.OX382150.1G211.1	TRINITY_DN2936_c0_g1_i10
2122748	F:0	M:3	p:0.0472209	pcorr:0.0472209	-	Osclob_v00_mik.OX382150.1G211.1	TRINITY_DN2936_c0_g1_i3
2122748	F:0	M:3	p:0.0472209	pcorr:0.0472209	-	Osclob_v00_mik.OX382150.1G211.1	TRINITY_DN2936_c0_g1_i16
2122748	F:0	M:3	p:0.0472209	pcorr:0.0472209	-	Osclob_v00_mik.OX382150.1G211.1	TRINITY_DN2936_c0_g1_i8
2139095	F:0	M:3	p:0.0472209	pcorr:0.0472209	-	Osclob_v00_mik.OX382161.1G97.1	TRINITY_DN9749_c0_g2_i1
2139395	F:0	M:3	p:0.0472209	pcorr:0.0472209	-	Osclob_v00_mik.OX382165.1G123.1	TRINITY_DN13453_c0_g1_i8
2140160	F:0	M:3	p:0.0472209	pcorr:0.0472209	-	Osclob_v00_mik.OX382165.1G115.1	TRINITY_DN128861_c0_g1_i1
2143120	F:0	M:3	p:0.0472209	pcorr:0.0472209	-	*	TRINITY_DN21969_c0_g1_i1
2145551	F:0	M:3	p:0.0472209	pcorr:0.0472209	-	Osclob_v00_mik.OX382154.1G802.1	TRINITY_DN4612_c1_g2_i1
2145551	F:0	M:3	p:0.0472209	pcorr:0.0472209	-	Osclob_v00_mik.OX382154.1G802.1	TRINITY_DN4612_c1_g2_i3
2145551	F:0	M:3	p:0.0472209	pcorr:0.0472209	-	Osclob_v00_mik.OX382154.1G802.1	TRINITY_DN4612_c1_g2_i2
2147581	F:0	M:3	p:0.0472209	pcorr:0.0472209	-	Osclob_v00_mik.OX382150.1G990.1	TRINITY_DN3308_c0_g3_i1
2147581	F:0	M:3	p:0.0472209	pcorr:0.0472209	-	Osclob_v00_mik.OX382150.1G990.1	TRINITY_DN3308_c0_g3_i3
2147581	F:0	M:3	p:0.0472209	pcorr:0.0472209	-	Osclob_v00_mik.OX382150.1G990.1	TRINITY_DN3308_c0_g1_i1
2147581	F:0	M:3	p:0.0472209	pcorr:0.0472209	-	Osclob_v00_mik.OX382150.1G990.1	TRINITY_DN15997_c1_g1_i2
2147581	F:0	M:3	p:0.0472209	pcorr:0.0472209	-	Osclob_v00_mik.OX382150.1G1020.1	TRINITY_DN15997_c1_g1_i1
2162226	F:0	M:3	p:0.0472209	pcorr:0.0472209	-	Osclob_v00_mik.OX382151.1G423.1	TRINITY_DN2847_c0_g2_i5
2162226	F:0	M:3	p:0.0472209	pcorr:0.0472209	-	Osclob_v00_mik.OX382151.1G409.1	TRINITY_DN2847_c0_g2_i10
2162226	F:0	M:3	p:0.0472209	pcorr:0.0472209	-	Osclob_v00_mik.OX382151.1G409.1	TRINITY_DN2847_c0_g2_i6
2162226	F:0	M:3	p:0.0472209	pcorr:0.0472209	-	Osclob_v00_mik.OX382151.1G423.1	TRINITY_DN2847_c0_g2_i9
2163792	F:0	M:3	p:0.0472209	pcorr:0.0472209	ITA7_RATIntegrin alpha-7 OS=Rattus norvegicus OX=10116 GN=Itga7 PE=1 SV=2	Osclob_v00_mik.OX382150.1G1128.1	TRINITY_DN2979_c0_g1_i22
2163792	F:0	M:3	p:0.0472209	pcorr:0.0472209	ITA7_RATIntegrin alpha-7 OS=Rattus norvegicus OX=10116 GN=Itga7 PE=1 SV=2	Osclob_v00_mik.OX382150.1G1128.1	TRINITY_DN2979_c0_g1_i23
2163792	F:0	M:3	p:0.0472209	pcorr:0.0472209	ITAV_MOUSEIntegrin alpha-V OS=Mus musculus OX=10090 GN=Itgav PE=1 SV=2	Osclob_v00_mik.OX382150.1G1128.1	TRINITY_DN2979_c0_g1_i17
2163792	F:0	M:3	p:0.0472209	pcorr:0.0472209	ITAV_MOUSEIntegrin alpha-V OS=Mus musculus OX=10090 GN=Itgav PE=1 SV=2	Osclob_v00_mik.OX382150.1G1128.1	TRINITY_DN2979_c0_g1_i21
2163792	F:0	M:3	p:0.0472209	pcorr:0.0472209	ITAV_MOUSEIntegrin alpha-V OS=Mus musculus OX=10090 GN=Itgav PE=1 SV=2	Osclob_v00_mik.OX382150.1G1128.1	TRINITY_DN2979_c0_g1_i2
2168700	F:0	M:3	p:0.0472209	pcorr:0.0472209	HEM6_DROMEOxygen-dependent coproporphyrinogen-III oxidase OS=Drosophila melanogaster OX=7227 GN=Coprox PE=2 SV=1	Osclob_v00_mik.OX382164.1G194.1	TRINITY_DN6387_c0_g2_i13
2168700	F:0	M:3	p:0.0472209	pcorr:0.0472209	HEM6_HUMANOxygen-dependent coproporphyrinogen-III oxidase, mitochondrial OS=Homo sapiens OX=9606 GN=CPOX PE=1 SV=3	Osclob_v00_mik.OX382164.1G194.1	TRINITY_DN6387_c0_g2_i12
2168700	F:0	M:3	p:0.0472209	pcorr:0.0472209	HEM6_HUMANOxygen-dependent coproporphyrinogen-III oxidase, mitochondrial OS=Homo sapiens OX=9606 GN=CPOX PE=1 SV=3	Osclob_v00_mik.OX382164.1G194.1	TRINITY_DN6387_c0_g2_i6
2168700	F:0	M:3	p:0.0472209	pcorr:0.0472209	HEM6_HUMANOxygen-dependent coproporphyrinogen-III oxidase, mitochondrial OS=Homo sapiens OX=9606 GN=CPOX PE=1 SV=3	Osclob_v00_mik.OX382164.1G194.1	TRINITY_DN6387_c0_g2_i11
2168700	F:0	M:3	p:0.0472209	pcorr:0.0472209	HEM6_HUMANOxygen-dependent coproporphyrinogen-III oxidase, mitochondrial OS=Homo sapiens OX=9606 GN=CPOX PE=1 SV=3	Osclob_v00_mik.OX382164.1G194.1	TRINITY_DN6387_c0_g2_i3
2174918	F:0	M:3	p:0.0472209	pcorr:0.0472209	TPPC9_BOVINTrafficking protein particle complex subunit 9 OS=Bos taurus OX=9913 GN=TRAPPC9 PE=1 SV=1	Osclob_v00_mik.OX382167.1G45.1	TRINITY_DN833_c0_g1_i11
2174918	F:0	M:3	p:0.0472209	pcorr:0.0472209	TPPC9_BOVINTrafficking protein particle complex subunit 9 OS=Bos taurus OX=9913 GN=TRAPPC9 PE=1 SV=1	Osclob_v00_mik.OX382167.1G45.1	TRINITY_DN833_c0_g1_i8
2174918	F:0	M:3	p:0.0472209	pcorr:0.0472209	-	Osclob_v00_mik.OX382167.1G44.1	TRINITY_DN833_c0_g1_i1
2190412	F:0	M:3	p:0.0472209	pcorr:0.0472209	NDUV1_GORGONADH dehydrogenase	Osclob_v00_mik.OX382167.1G29.1	TRINITY_DN2992_c1_g1_i7
2190412	F:0	M:3	p:0.0472209	pcorr:0.0472209	NDUV1_MOUSENADH dehydrogenase	Osclob_v00_mik.OX382167.1G29.1	TRINITY_DN2992_c1_g1_i14
2190412	F:0	M:3	p:0.0472209	pcorr:0.0472209	NDUV1_MOUSENADH dehydrogenase	Osclob_v00_mik.OX382167.1G29.1	TRINITY_DN2992_c1_g1_i4
2190412	F:0	M:3	p:0.0472209	pcorr:0.0472209	NDUV1_MOUSENADH dehydrogenase	Osclob_v00_mik.OX382167.1G29.1	TRINITY_DN2992_c1_g1_i13
2190412	F:0	M:3	p:0.0472209	pcorr:0.0472209	NDUV1_MOUSENADH dehydrogenase	Osclob_v00_mik.OX382167.1G29.1	TRINITY_DN2992_c1_g1_i5
2201548	F:0	M:3	p:0.0472209	pcorr:0.0472209	-	Osclob_v00_mik.OX382166.1G372.1	TRINITY_DN4302_c0_g3_i1
2201548	F:0	M:3	p:0.0472209	pcorr:0.0472209	-	Osclob_v00_mik.OX382166.1G372.1	TRINITY_DN4302_c0_g3_i12
2201548	F:0	M:3	p:0.0472209	pcorr:0.0472209	-	Osclob_v00_mik.OX382166.1G372.1	TRINITY_DN4302_c0_g3_i11
2201548	F:0	M:3	p:0.0472209	pcorr:0.0472209	-	Osclob_v00_mik.OX382166.1G372.1	TRINITY_DN4302_c0_g3_i10
2201548	F:0	M:3	p:0.0472209	pcorr:0.0472209	-	*	TRINITY_DN4302_c0_g1_i2
2203860	F:0	M:3	p:0.0472209	pcorr:0.0472209	TRM1_MOUSEtRNA (guanine(26)-N(2))-dimethyltransferase OS=Mus musculus OX=10090 GN=Trmt1 PE=1 SV=2	Osclob_v00_mik.OX382151.1G99.1	TRINITY_DN8933_c0_g1_i10
2203860	F:0	M:3	p:0.0472209	pcorr:0.0472209	TRM1_MOUSEtRNA (guanine(26)-N(2))-dimethyltransferase OS=Mus musculus OX=10090 GN=Trmt1 PE=1 SV=2	Osclob_v00_mik.OX382151.1G99.1	TRINITY_DN8933_c0_g1_i14
2203860	F:0	M:3	p:0.0472209	pcorr:0.0472209	TRM1_MOUSEtRNA (guanine(26)-N(2))-dimethyltransferase OS=Mus musculus OX=10090 GN=Trmt1 PE=1 SV=2	Osclob_v00_mik.OX382151.1G99.1	TRINITY_DN8933_c0_g1_i7
2203860	F:0	M:3	p:0.0472209	pcorr:0.0472209	TRM1_MOUSEtRNA (guanine(26)-N(2))-dimethyltransferase OS=Mus musculus OX=10090 GN=Trmt1 PE=1 SV=2	Osclob_v00_mik.OX382151.1G99.1	TRINITY_DN8933_c0_g1_i5
2203860	F:0	M:3	p:0.0472209	pcorr:0.0472209	TRM1_MOUSEtRNA (guanine(26)-N(2))-dimethyltransferase OS=Mus musculus OX=10090 GN=Trmt1 PE=1 SV=2	Osclob_v00_mik.OX382151.1G99.1	TRINITY_DN8933_c0_g1_i3
2217639	F:0	M:3	p:0.0472209	pcorr:0.0472209	GTDC1_MOUSEGlycosyltransferase-like domain-containing protein 1 OS=Mus musculus OX=10090 GN=Gtdc1 PE=2 SV=2	Osclob_v00_mik.OX382153.1G799.1	TRINITY_DN6440_c0_g1_i19
2217639	F:0	M:3	p:0.0472209	pcorr:0.0472209	GTDC1_MOUSEGlycosyltransferase-like domain-containing protein 1 OS=Mus musculus OX=10090 GN=Gtdc1 PE=2 SV=2	Osclob_v00_mik.OX382153.1G799.1	TRINITY_DN6440_c0_g1_i19
2217639	F:0	M:3	p:0.0472209	pcorr:0.0472209	GTDC1_BOVINGlycosyltransferase-like domain-containing protein 1 OS=Bos taurus OX=9913 GN=GTDC1 PE=2 SV=1	Osclob_v00_mik.OX382153.1G792.1	TRINITY_DN6440_c0_g1_i21
2217639	F:0	M:3	p:0.0472209	pcorr:0.0472209	GTDC1_BOVINGlycosyltransferase-like domain-containing protein 1 OS=Bos taurus OX=9913 GN=GTDC1 PE=2 SV=1	Osclob_v00_mik.OX382153.1G792.1	TRINITY_DN6440_c0_g1_i21
2217639	F:0	M:3	p:0.0472209	pcorr:0.0472209	GTDC1_DANREGlycosyltransferase-like domain-containing protein 1 OS=Danio rerio OX=7955 GN=gtdc1 PE=2 SV=2	Osclob_v00_mik.OX382153.1G792.1	TRINITY_DN6440_c0_g1_i24
2217639	F:0	M:3	p:0.0472209	pcorr:0.0472209	GTDC1_DANREGlycosyltransferase-like domain-containing protein 1 OS=Danio rerio OX=7955 GN=gtdc1 PE=2 SV=2	Osclob_v00_mik.OX382153.1G792.1	TRINITY_DN6440_c0_g1_i24
2217639	F:0	M:3	p:0.0472209	pcorr:0.0472209	GTDC1_XENLAGlycosyltransferase-like domain-containing protein 1 OS=Xenopus laevis OX=8355 GN=gtdc1 PE=2 SV=1	Osclob_v00_mik.OX382153.1G792.1	TRINITY_DN6440_c0_g1_i13
2217639	F:0	M:3	p:0.0472209	pcorr:0.0472209	GTDC1_XENLAGlycosyltransferase-like domain-containing protein 1 OS=Xenopus laevis OX=8355 GN=gtdc1 PE=2 SV=1	Osclob_v00_mik.OX382153.1G792.1	TRINITY_DN6440_c0_g1_i13
2217639	F:0	M:3	p:0.0472209	pcorr:0.0472209	GTDC1_DANREGlycosyltransferase-like domain-containing protein 1 OS=Danio rerio OX=7955 GN=gtdc1 PE=2 SV=2	Osclob_v00_mik.OX382153.1G792.1	TRINITY_DN6440_c0_g1_i3
2217639	F:0	M:3	p:0.0472209	pcorr:0.0472209	GTDC1_DANREGlycosyltransferase-like domain-containing protein 1 OS=Danio rerio OX=7955 GN=gtdc1 PE=2 SV=2	Osclob_v00_mik.OX382153.1G792.1	TRINITY_DN6440_c0_g1_i3
2231261	F:0	M:3	p:0.0472209	pcorr:0.0472209	SVEP1_RATSushi, von Willebrand factor type A, EGF and pentraxin domain-containing protein 1 OS=Rattus norvegicus OX=10116 GN=Svep1 PE=1 SV=1	Osclob_v00_mik.OX382169.1G395.1	TRINITY_DN20073_c0_g1_i9
2231261	F:0	M:3	p:0.0472209	pcorr:0.0472209	SVEP1_RATSushi, von Willebrand factor type A, EGF and pentraxin domain-containing protein 1 OS=Rattus norvegicus OX=10116 GN=Svep1 PE=1 SV=1	Osclob_v00_mik.OX382169.1G395.1	TRINITY_DN20073_c0_g1_i3
2231261	F:0	M:3	p:0.0472209	pcorr:0.0472209	SVEP1_RATSushi, von Willebrand factor type A, EGF and pentraxin domain-containing protein 1 OS=Rattus norvegicus OX=10116 GN=Svep1 PE=1 SV=1	Osclob_v00_mik.OX382169.1G395.1	TRINITY_DN20073_c0_g1_i4
2231261	F:0	M:3	p:0.0472209	pcorr:0.0472209	CSMD1_HUMANCUB and sushi domain-containing protein 1 OS=Homo sapiens OX=9606 GN=CSMD1 PE=1 SV=3	Osclob_v00_mik.OX382169.1G395.1	TRINITY_DN10329_c0_g1_i7
2231261	F:0	M:3	p:0.0472209	pcorr:0.0472209	SVEP1_RATSushi, von Willebrand factor type A, EGF and pentraxin domain-containing protein 1 OS=Rattus norvegicus OX=10116 GN=Svep1 PE=1 SV=1	Osclob_v00_mik.OX382169.1G395.1	TRINITY_DN20073_c0_g1_i5
2248583	F:0	M:3	p:0.0472209	pcorr:0.0472209	G3P_DROHYGlyceraldehyde-3-phosphate dehydrogenase OS=Drosophila hydei OX=7224 GN=Gapdh1 PE=3 SV=1	Osclob_v00_mik.OX382165.1G351.1	TRINITY_DN223457_c0_g1_i1
2258757	F:0	M:3	p:0.0472209	pcorr:0.0472209	-	*	TRINITY_DN21969_c0_g1_i1
2259267	F:0	M:3	p:0.0472209	pcorr:0.0472209	PI4KA_BOVINPhosphatidylinositol 4-kinase alpha OS=Bos taurus OX=9913 GN=PI4KA PE=2 SV=2	Osclob_v00_mik.OX382163.1G325.1	TRINITY_DN2557_c0_g1_i8
2259267	F:0	M:3	p:0.0472209	pcorr:0.0472209	PI4KA_BOVINPhosphatidylinositol 4-kinase alpha OS=Bos taurus OX=9913 GN=PI4KA PE=2 SV=2	Osclob_v00_mik.OX382163.1G325.1	TRINITY_DN2557_c0_g1_i3
2259267	F:0	M:3	p:0.0472209	pcorr:0.0472209	PI4KA_BOVINPhosphatidylinositol 4-kinase alpha OS=Bos taurus OX=9913 GN=PI4KA PE=2 SV=2	Osclob_v00_mik.OX382163.1G325.1	TRINITY_DN2557_c0_g1_i4
2259267	F:0	M:3	p:0.0472209	pcorr:0.0472209	PI4KA_BOVINPhosphatidylinositol 4-kinase alpha OS=Bos taurus OX=9913 GN=PI4KA PE=2 SV=2	Osclob_v00_mik.OX382163.1G325.1	TRINITY_DN2557_c0_g1_i10
2259267	F:0	M:3	p:0.0472209	pcorr:0.0472209	PI4KA_BOVINPhosphatidylinositol 4-kinase alpha OS=Bos taurus OX=9913 GN=PI4KA PE=2 SV=2	Osclob_v00_mik.OX382163.1G325.1	TRINITY_DN2557_c0_g1_i20
2272560	F:0	M:3	p:0.0472209	pcorr:0.0472209	LZIC_MOUSEProtein LZIC OS=Mus musculus OX=10090 GN=Lzic PE=1 SV=1	Osclob_v00_mik.OX382165.1G456.1	TRINITY_DN1993_c0_g1_i9
2272560	F:0	M:3	p:0.0472209	pcorr:0.0472209	LZIC_MOUSEProtein LZIC OS=Mus musculus OX=10090 GN=Lzic PE=1 SV=1	Osclob_v00_mik.OX382165.1G456.1	TRINITY_DN1993_c0_g1_i9
2272560	F:0	M:3	p:0.0472209	pcorr:0.0472209	LZIC_MOUSEProtein LZIC OS=Mus musculus OX=10090 GN=Lzic PE=1 SV=1	Osclob_v00_mik.OX382165.1G456.1	TRINITY_DN1993_c0_g1_i1
2272560	F:0	M:3	p:0.0472209	pcorr:0.0472209	LZIC_MOUSEProtein LZIC OS=Mus musculus OX=10090 GN=Lzic PE=1 SV=1	Osclob_v00_mik.OX382165.1G456.1	TRINITY_DN1993_c0_g1_i1
2272560	F:0	M:3	p:0.0472209	pcorr:0.0472209	LZIC_MOUSEProtein LZIC OS=Mus musculus OX=10090 GN=Lzic PE=1 SV=1	Osclob_v00_mik.OX382165.1G456.1	TRINITY_DN1993_c0_g1_i5
2272560	F:0	M:3	p:0.0472209	pcorr:0.0472209	LZIC_MOUSEProtein LZIC OS=Mus musculus OX=10090 GN=Lzic PE=1 SV=1	Osclob_v00_mik.OX382165.1G456.1	TRINITY_DN1993_c0_g1_i5
2272560	F:0	M:3	p:0.0472209	pcorr:0.0472209	LZIC_MOUSEProtein LZIC OS=Mus musculus OX=10090 GN=Lzic PE=1 SV=1	Osclob_v00_mik.OX382165.1G456.1	TRINITY_DN1993_c0_g1_i6
2272560	F:0	M:3	p:0.0472209	pcorr:0.0472209	LZIC_MOUSEProtein LZIC OS=Mus musculus OX=10090 GN=Lzic PE=1 SV=1	Osclob_v00_mik.OX382165.1G456.1	TRINITY_DN1993_c0_g1_i6
2272560	F:0	M:3	p:0.0472209	pcorr:0.0472209	LZIC_MOUSEProtein LZIC OS=Mus musculus OX=10090 GN=Lzic PE=1 SV=1	Osclob_v00_mik.OX382165.1G456.1	TRINITY_DN1993_c0_g1_i7
2272560	F:0	M:3	p:0.0472209	pcorr:0.0472209	LZIC_MOUSEProtein LZIC OS=Mus musculus OX=10090 GN=Lzic PE=1 SV=1	Osclob_v00_mik.OX382165.1G456.1	TRINITY_DN1993_c0_g1_i7
2275694	F:0	M:3	p:0.0472209	pcorr:0.0472209	SGF29_RATSAGA-associated factor 29 OS=Rattus norvegicus OX=10116 GN=Sgf29 PE=1 SV=1	Osclob_v00_mik.OX382154.1G444.1	TRINITY_DN3534_c1_g1_i13
2275694	F:0	M:3	p:0.0472209	pcorr:0.0472209	TRM11_RATtRNA (guanine(10)-N2)-methyltransferase homolog OS=Rattus norvegicus OX=10116 GN=Trmt11 PE=2 SV=1	Osclob_v00_mik.OX382167.1G327.1	TRINITY_DN3534_c1_g1_i14
2275694	F:0	M:3	p:0.0472209	pcorr:0.0472209	TRM11_RATtRNA (guanine(10)-N2)-methyltransferase homolog OS=Rattus norvegicus OX=10116 GN=Trmt11 PE=2 SV=1	Osclob_v00_mik.OX382167.1G327.1	TRINITY_DN3534_c1_g1_i16
2275694	F:0	M:3	p:0.0472209	pcorr:0.0472209	SGF29_RATSAGA-associated factor 29 OS=Rattus norvegicus OX=10116 GN=Sgf29 PE=1 SV=1	Osclob_v00_mik.OX382154.1G444.1	TRINITY_DN3534_c1_g1_i20
2275694	F:0	M:3	p:0.0472209	pcorr:0.0472209	SGF29_RATSAGA-associated factor 29 OS=Rattus norvegicus OX=10116 GN=Sgf29 PE=1 SV=1	Osclob_v00_mik.OX382155.1G127.2	TRINITY_DN3534_c1_g1_i21
2278530	F:0	M:3	p:0.0472209	pcorr:0.0472209	-	Osclob_v00_mik.OX382166.1G442.1	TRINITY_DN29047_c0_g1_i9
2278530	F:0	M:3	p:0.0472209	pcorr:0.0472209	-	Osclob_v00_mik.OX382166.1G442.1	TRINITY_DN29047_c0_g1_i3
2288441	F:0	M:3	p:0.0472209	pcorr:0.0472209	GRWD1_RATGlutamate-rich WD repeat-containing protein 1 OS=Rattus norvegicus OX=10116 GN=Grwd1 PE=2 SV=1	Osclob_v00_mik.OX382154.1G231.1	TRINITY_DN1019_c0_g2_i5
2288441	F:0	M:3	p:0.0472209	pcorr:0.0472209	GRWD1_RATGlutamate-rich WD repeat-containing protein 1 OS=Rattus norvegicus OX=10116 GN=Grwd1 PE=2 SV=1	Osclob_v00_mik.OX382154.1G230.1	TRINITY_DN1019_c0_g2_i8
2288441	F:0	M:3	p:0.0472209	pcorr:0.0472209	-	Osclob_v00_mik.OX382154.1G230.1	TRINITY_DN1019_c0_g2_i4
2288441	F:0	M:3	p:0.0472209	pcorr:0.0472209	-	Osclob_v00_mik.OX382154.1G230.1	TRINITY_DN1019_c0_g1_i10
2288441	F:0	M:3	p:0.0472209	pcorr:0.0472209	TM104_DROMETransmembrane protein 104 homolog OS=Drosophila melanogaster OX=7227 GN=CG5262 PE=2 SV=2	Osclob_v00_mik.OX382154.1G230.1	TRINITY_DN1019_c0_g1_i3
2291549	F:0	M:3	p:0.0472209	pcorr:0.0472209	WDR3_HUMANWD repeat-containing protein 3 OS=Homo sapiens OX=9606 GN=WDR3 PE=1 SV=1	Osclob_v00_mik.OX382160.1G191.1	TRINITY_DN7839_c0_g1_i18
2291549	F:0	M:3	p:0.0472209	pcorr:0.0472209	WDR3_HUMANWD repeat-containing protein 3 OS=Homo sapiens OX=9606 GN=WDR3 PE=1 SV=1	Osclob_v00_mik.OX382160.1G191.1	TRINITY_DN7839_c0_g1_i19
2291549	F:0	M:3	p:0.0472209	pcorr:0.0472209	WDR3_HUMANWD repeat-containing protein 3 OS=Homo sapiens OX=9606 GN=WDR3 PE=1 SV=1	Osclob_v00_mik.OX382160.1G191.1	TRINITY_DN7839_c0_g1_i6
2291549	F:0	M:3	p:0.0472209	pcorr:0.0472209	WDR3_HUMANWD repeat-containing protein 3 OS=Homo sapiens OX=9606 GN=WDR3 PE=1 SV=1	Osclob_v00_mik.OX382160.1G191.1	TRINITY_DN7839_c0_g1_i12
2291549	F:0	M:3	p:0.0472209	pcorr:0.0472209	WDR3_MOUSEWD repeat-containing protein 3 OS=Mus musculus OX=10090 GN=Wdr3 PE=1 SV=1	Osclob_v00_mik.OX382160.1G191.1	TRINITY_DN7839_c0_g1_i11
2293419	F:0	M:3	p:0.0472209	pcorr:0.0472209	PLXA1_MOUSEPlexin-A1 OS=Mus musculus OX=10090 GN=Plxna1 PE=1 SV=1	Osclob_v00_mik.OX382158.1G182.1	TRINITY_DN8601_c0_g1_i2
2293419	F:0	M:3	p:0.0472209	pcorr:0.0472209	PLXA1_MOUSEPlexin-A1 OS=Mus musculus OX=10090 GN=Plxna1 PE=1 SV=1	Osclob_v00_mik.OX382158.1G182.1	TRINITY_DN8601_c0_g1_i1
2293419	F:0	M:3	p:0.0472209	pcorr:0.0472209	PLXA3_DANREPlexin A3 OS=Danio rerio OX=7955 GN=plxna3 PE=2 SV=2	Osclob_v00_mik.OX382169.1G433.1	TRINITY_DN1442_c0_g1_i11
2293419	F:0	M:3	p:0.0472209	pcorr:0.0472209	PLXA4_DANREPlexin-A4 OS=Danio rerio OX=7955 GN=plxna4 PE=2 SV=1	Osclob_v00_mik.OX382169.1G433.1	TRINITY_DN1442_c0_g1_i12
2293419	F:0	M:3	p:0.0472209	pcorr:0.0472209	PLXA3_DANREPlexin A3 OS=Danio rerio OX=7955 GN=plxna3 PE=2 SV=2	Osclob_v00_mik.OX382169.1G433.1	TRINITY_DN1442_c0_g1_i5
2296146	F:0	M:3	p:0.0472209	pcorr:0.0472209	ANR26_HUMANAnkyrin repeat domain-containing protein 26 OS=Homo sapiens OX=9606 GN=ANKRD26 PE=1 SV=4	Osclob_v00_mik.OX382154.1G535.1	TRINITY_DN3088_c0_g1_i7
2296146	F:0	M:3	p:0.0472209	pcorr:0.0472209	AR11_XENLAApoptosis regulator R11 OS=Xenopus laevis OX=8355 PE=2 SV=1	Osclob_v00_mik.OX382153.1G328.1	TRINITY_DN3088_c0_g1_i6
2296146	F:0	M:3	p:0.0472209	pcorr:0.0472209	ANR26_HUMANAnkyrin repeat domain-containing protein 26 OS=Homo sapiens OX=9606 GN=ANKRD26 PE=1 SV=4	Osclob_v00_mik.OX382153.1G328.1	TRINITY_DN3088_c0_g1_i8
2296146	F:0	M:3	p:0.0472209	pcorr:0.0472209	ANR26_HUMANAnkyrin repeat domain-containing protein 26 OS=Homo sapiens OX=9606 GN=ANKRD26 PE=1 SV=4	Osclob_v00_mik.OX382153.1G328.1	TRINITY_DN3088_c0_g1_i3
2296146	F:0	M:3	p:0.0472209	pcorr:0.0472209	AR11_XENLAApoptosis regulator R11 OS=Xenopus laevis OX=8355 PE=2 SV=1	Osclob_v00_mik.OX382153.1G328.1	TRINITY_DN3088_c0_g1_i4
2300709	F:0	M:3	p:0.0472209	pcorr:0.0472209	-	Osclob_v00_mik.OX382154.1G744.1	TRINITY_DN20364_c0_g1_i3
2300709	F:0	M:3	p:0.0472209	pcorr:0.0472209	TORSO_BOMMOTyrosine-protein kinase receptor torso OS=Bombyx mori OX=7091 GN=tor PE=1 SV=1	Osclob_v00_mik.OX382154.1G791.1	TRINITY_DN20364_c0_g1_i1
2300709	F:0	M:3	p:0.0472209	pcorr:0.0472209	TORSO_BOMMOTyrosine-protein kinase receptor torso OS=Bombyx mori OX=7091 GN=tor PE=1 SV=1	Osclob_v00_mik.OX382154.1G796.1	TRINITY_DN5587_c0_g1_i2
2300709	F:0	M:3	p:0.0472209	pcorr:0.0472209	FGFR_HALROFibroblast growth factor receptor OS=Halocynthia roretzi OX=7729 GN=FGFR PE=2 SV=1	Osclob_v00_mik.OX382154.1G796.1	TRINITY_DN5587_c0_g1_i1
2300709	F:0	M:3	p:0.0472209	pcorr:0.0472209	FGFR_HALROFibroblast growth factor receptor OS=Halocynthia roretzi OX=7729 GN=FGFR PE=2 SV=1	Osclob_v00_mik.OX382154.1G796.1	TRINITY_DN5587_c0_g1_i3
2301795	F:0	M:3	p:0.0472209	pcorr:0.0472209	RYK_AVIR3Tyrosine-protein kinase transforming protein RYK OS=Avian retrovirus RPL30 OX=31671 GN=V-RYK PE=2 SV=1	Osclob_v00_mik.OX382169.1G333.1	TRINITY_DN535_c0_g2_i5
2301795	F:0	M:3	p:0.0472209	pcorr:0.0472209	SEA_AVIETTyrosine-protein kinase transforming protein SEA OS=Avian erythroblastosis virus (strain S13) OX=11863 GN=V-SEA PE=3 SV=2	Osclob_v00_mik.OX382169.1G333.1	TRINITY_DN535_c0_g2_i2
2301795	F:0	M:3	p:0.0472209	pcorr:0.0472209	RYK_AVIR3Tyrosine-protein kinase transforming protein RYK OS=Avian retrovirus RPL30 OX=31671 GN=V-RYK PE=2 SV=1	Osclob_v00_mik.OX382169.1G333.1	TRINITY_DN535_c0_g2_i9
2301795	F:0	M:3	p:0.0472209	pcorr:0.0472209	RYK_AVIR3Tyrosine-protein kinase transforming protein RYK OS=Avian retrovirus RPL30 OX=31671 GN=V-RYK PE=2 SV=1	Osclob_v00_mik.OX382169.1G333.1	TRINITY_DN535_c0_g2_i3
2301795	F:0	M:3	p:0.0472209	pcorr:0.0472209	RYK_AVIR3Tyrosine-protein kinase transforming protein RYK OS=Avian retrovirus RPL30 OX=31671 GN=V-RYK PE=2 SV=1	Osclob_v00_mik.OX382169.1G333.1	TRINITY_DN535_c0_g2_i4
2306426	F:0	M:3	p:0.0472209	pcorr:0.0472209	-	Osclob_v00_mik.OX382152.1G293.1	TRINITY_DN11859_c1_g1_i9
2306426	F:0	M:3	p:0.0472209	pcorr:0.0472209	-	Osclob_v00_mik.OX382152.1G293.1	TRINITY_DN11859_c1_g1_i8
2306426	F:0	M:3	p:0.0472209	pcorr:0.0472209	-	Osclob_v00_mik.OX382152.1G293.1	TRINITY_DN11859_c1_g1_i5
2307168	F:0	M:3	p:0.0472209	pcorr:0.0472209	-	Osclob_v00_mik.OX382154.1G652.1	TRINITY_DN143648_c0_g1_i1
2308743	F:0	M:3	p:0.0472209	pcorr:0.0472209	DAPK1_HUMANDeath-associated protein kinase 1 OS=Homo sapiens OX=9606 GN=DAPK1 PE=1 SV=6	Osclob_v00_mik.OX382154.1G678.1	TRINITY_DN4036_c0_g2_i2
2308743	F:0	M:3	p:0.0472209	pcorr:0.0472209	DAPK1_HUMANDeath-associated protein kinase 1 OS=Homo sapiens OX=9606 GN=DAPK1 PE=1 SV=6	Osclob_v00_mik.OX382154.1G678.1	TRINITY_DN4036_c0_g2_i7
2308743	F:0	M:3	p:0.0472209	pcorr:0.0472209	DAPK1_HUMANDeath-associated protein kinase 1 OS=Homo sapiens OX=9606 GN=DAPK1 PE=1 SV=6	Osclob_v00_mik.OX382154.1G678.1	TRINITY_DN4036_c0_g2_i8
2308743	F:0	M:3	p:0.0472209	pcorr:0.0472209	DAPK1_HUMANDeath-associated protein kinase 1 OS=Homo sapiens OX=9606 GN=DAPK1 PE=1 SV=6	Osclob_v00_mik.OX382154.1G678.1	TRINITY_DN4036_c0_g2_i13
2308743	F:0	M:3	p:0.0472209	pcorr:0.0472209	DAPK1_HUMANDeath-associated protein kinase 1 OS=Homo sapiens OX=9606 GN=DAPK1 PE=1 SV=6	Osclob_v00_mik.OX382154.1G678.1	TRINITY_DN4036_c0_g2_i17
2308898	F:0	M:3	p:0.0472209	pcorr:0.0472209	-	*	TRINITY_DN7206_c0_g1_i3
2308898	F:0	M:3	p:0.0472209	pcorr:0.0472209	-	*	TRINITY_DN7206_c0_g1_i6
2308898	F:0	M:3	p:0.0472209	pcorr:0.0472209	RECQ5_RATATP-dependent DNA helicase Q5 OS=Rattus norvegicus OX=10116 GN=Recql5 PE=1 SV=1	Osclob_v00_mik.OX382156.1G268.1	TRINITY_DN7206_c0_g1_i11
2308898	F:0	M:3	p:0.0472209	pcorr:0.0472209	RECQ5_RATATP-dependent DNA helicase Q5 OS=Rattus norvegicus OX=10116 GN=Recql5 PE=1 SV=1	Osclob_v00_mik.OX382156.1G268.1	TRINITY_DN7206_c0_g1_i9
2309876	F:0	M:3	p:0.0472209	pcorr:0.0472209	USH2A_RATUsherin OS=Rattus norvegicus OX=10116 GN=Ush2a PE=1 SV=2	Osclob_v00_mik.OX382158.1G66.1	TRINITY_DN793_c0_g2_i2
2309876	F:0	M:3	p:0.0472209	pcorr:0.0472209	USH2A_MOUSEUsherin OS=Mus musculus OX=10090 GN=Ush2A PE=1 SV=2	Osclob_v00_mik.OX382159.1G57.1	TRINITY_DN137709_c0_g1_i1
2309876	F:0	M:3	p:0.0472209	pcorr:0.0472209	NET1_CHICKNetrin-1 OS=Gallus gallus OX=9031 GN=NTN1 PE=1 SV=1	Osclob_v00_mik.OX382158.1G695.1	TRINITY_DN4518_c0_g1_i2
2310534	F:0	M:3	p:0.0472209	pcorr:0.0472209	-	Osclob_v00_mik.OX382164.1G285.1	TRINITY_DN13944_c0_g1_i8
2310534	F:0	M:3	p:0.0472209	pcorr:0.0472209	-	Osclob_v00_mik.OX382164.1G285.1	TRINITY_DN13944_c0_g1_i2
2310534	F:0	M:3	p:0.0472209	pcorr:0.0472209	BARK_DROMEProtein bark beetle OS=Drosophila melanogaster OX=7227 GN=bark PE=1 SV=1	Osclob_v00_mik.OX382159.1G440.1	TRINITY_DN108_c1_g2_i4
2310534	F:0	M:3	p:0.0472209	pcorr:0.0472209	BARK_DROMEProtein bark beetle OS=Drosophila melanogaster OX=7227 GN=bark PE=1 SV=1	Osclob_v00_mik.OX382159.1G440.1	TRINITY_DN108_c1_g2_i1
2310534	F:0	M:3	p:0.0472209	pcorr:0.0472209	BARK_DROMEProtein bark beetle OS=Drosophila melanogaster OX=7227 GN=bark PE=1 SV=1	Osclob_v00_mik.OX382159.1G440.1	TRINITY_DN108_c1_g2_i5
2311357	F:0	M:3	p:0.0472209	pcorr:0.0472209	RAE1L_XENTRmRNA export factor OS=Xenopus tropicalis OX=8364 GN=rae1 PE=2 SV=1	Osclob_v00_mik.OX382166.1G105.1	TRINITY_DN5958_c0_g1_i12
2311357	F:0	M:3	p:0.0472209	pcorr:0.0472209	RAE1L_XENTRmRNA export factor OS=Xenopus tropicalis OX=8364 GN=rae1 PE=2 SV=1	Osclob_v00_mik.OX382166.1G105.1	TRINITY_DN5958_c0_g1_i7
2311357	F:0	M:3	p:0.0472209	pcorr:0.0472209	EYA1_HUMANEyes absent homolog 1 OS=Homo sapiens OX=9606 GN=EYA1 PE=1 SV=2	Osclob_v00_mik.OX382166.1G105.1	TRINITY_DN5958_c0_g1_i6
2311357	F:0	M:3	p:0.0472209	pcorr:0.0472209	EYA1_MOUSEEyes absent homolog 1 OS=Mus musculus OX=10090 GN=Eya1 PE=1 SV=3	Osclob_v00_mik.OX382166.1G99.1	TRINITY_DN5958_c0_g1_i1
2311357	F:0	M:3	p:0.0472209	pcorr:0.0472209	EYA1_HUMANEyes absent homolog 1 OS=Homo sapiens OX=9606 GN=EYA1 PE=1 SV=2	Osclob_v00_mik.OX382166.1G99.1	TRINITY_DN5958_c0_g1_i8
2312698	F:0	M:3	p:0.0472209	pcorr:0.0472209	FARP2_MOUSEFERM, ARHGEF and pleckstrin domain-containing protein 2 OS=Mus musculus OX=10090 GN=Farp2 PE=1 SV=2	Osclob_v00_mik.OX382163.1G340.1	TRINITY_DN1580_c1_g1_i22
2312698	F:0	M:3	p:0.0472209	pcorr:0.0472209	FARP2_HUMANFERM, ARHGEF and pleckstrin domain-containing protein 2 OS=Homo sapiens OX=9606 GN=FARP2 PE=1 SV=3	Osclob_v00_mik.OX382163.1G340.1	TRINITY_DN1580_c1_g1_i17
2312698	F:0	M:3	p:0.0472209	pcorr:0.0472209	FARP2_HUMANFERM, ARHGEF and pleckstrin domain-containing protein 2 OS=Homo sapiens OX=9606 GN=FARP2 PE=1 SV=3	Osclob_v00_mik.OX382163.1G340.1	TRINITY_DN1580_c1_g1_i30
2312698	F:0	M:3	p:0.0472209	pcorr:0.0472209	FGD6_MOUSEFYVE, RhoGEF and PH domain-containing protein 6 OS=Mus musculus OX=10090 GN=Fgd6 PE=1 SV=2	Osclob_v00_mik.OX382163.1G340.1	TRINITY_DN1580_c1_g1_i11
2312698	F:0	M:3	p:0.0472209	pcorr:0.0472209	FARP2_MOUSEFERM, ARHGEF and pleckstrin domain-containing protein 2 OS=Mus musculus OX=10090 GN=Farp2 PE=1 SV=2	Osclob_v00_mik.OX382163.1G340.1	TRINITY_DN1580_c1_g1_i7
2319038	F:0	M:3	p:0.0472209	pcorr:0.0472209	MINP1_CHICKMultiple inositol polyphosphate phosphatase 1 OS=Gallus gallus OX=9031 GN=MINPP1 PE=1 SV=3	Osclob_v00_mik.OX382158.1G784.1	TRINITY_DN904_c0_g1_i15
2319038	F:0	M:3	p:0.0472209	pcorr:0.0472209	MINP1_CHICKMultiple inositol polyphosphate phosphatase 1 OS=Gallus gallus OX=9031 GN=MINPP1 PE=1 SV=3	Osclob_v00_mik.OX382158.1G784.1	TRINITY_DN904_c0_g1_i5
2319038	F:0	M:3	p:0.0472209	pcorr:0.0472209	MINP1_CHICKMultiple inositol polyphosphate phosphatase 1 OS=Gallus gallus OX=9031 GN=MINPP1 PE=1 SV=3	Osclob_v00_mik.OX382158.1G784.1	TRINITY_DN904_c0_g1_i2
2319038	F:0	M:3	p:0.0472209	pcorr:0.0472209	MINP1_CHICKMultiple inositol polyphosphate phosphatase 1 OS=Gallus gallus OX=9031 GN=MINPP1 PE=1 SV=3	Osclob_v00_mik.OX382158.1G784.1	TRINITY_DN904_c0_g1_i18
2319038	F:0	M:3	p:0.0472209	pcorr:0.0472209	MINP1_CHICKMultiple inositol polyphosphate phosphatase 1 OS=Gallus gallus OX=9031 GN=MINPP1 PE=1 SV=3	Osclob_v00_mik.OX382158.1G784.1	TRINITY_DN904_c0_g1_i11
2320156	F:0	M:3	p:0.0472209	pcorr:0.0472209	-	Osclob_v00_mik.OX382158.1G402.1	TRINITY_DN176188_c0_g1_i1
2320576	F:0	M:3	p:0.0472209	pcorr:0.0472209	DYH10_HUMANDynein axonemal heavy chain 10 OS=Homo sapiens OX=9606 GN=DNAH10 PE=1 SV=4	Osclob_v00_mik.OX382154.1G760.1	TRINITY_DN4539_c0_g1_i1
2320576	F:0	M:3	p:0.0472209	pcorr:0.0472209	DYH10_HUMANDynein axonemal heavy chain 10 OS=Homo sapiens OX=9606 GN=DNAH10 PE=1 SV=4	Osclob_v00_mik.OX382154.1G760.1	TRINITY_DN4539_c0_g1_i5
2320576	F:0	M:3	p:0.0472209	pcorr:0.0472209	DYH10_HUMANDynein axonemal heavy chain 10 OS=Homo sapiens OX=9606 GN=DNAH10 PE=1 SV=4	Osclob_v00_mik.OX382154.1G760.1	TRINITY_DN4539_c0_g1_i4
2320576	F:0	M:3	p:0.0472209	pcorr:0.0472209	DYH10_HUMANDynein axonemal heavy chain 10 OS=Homo sapiens OX=9606 GN=DNAH10 PE=1 SV=4	Osclob_v00_mik.OX382154.1G760.1	TRINITY_DN4539_c0_g1_i6
2320576	F:0	M:3	p:0.0472209	pcorr:0.0472209	DYH10_HUMANDynein axonemal heavy chain 10 OS=Homo sapiens OX=9606 GN=DNAH10 PE=1 SV=4	Osclob_v00_mik.OX382154.1G760.1	TRINITY_DN4539_c0_g1_i3
2321844	F:0	M:3	p:0.0472209	pcorr:0.0472209	LZIC_HUMANProtein LZIC OS=Homo sapiens OX=9606 GN=LZIC PE=1 SV=1	Osclob_v00_mik.OX382165.1G453.1	TRINITY_DN27023_c0_g1_i1
2321844	F:0	M:3	p:0.0472209	pcorr:0.0472209	-	Osclob_v00_mik.OX382165.1G453.1	TRINITY_DN27023_c0_g1_i2
2321844	F:0	M:3	p:0.0472209	pcorr:0.0472209	LZIC_MOUSEProtein LZIC OS=Mus musculus OX=10090 GN=Lzic PE=1 SV=1	Osclob_v00_mik.OX382165.1G456.1	TRINITY_DN1993_c0_g1_i9
2321844	F:0	M:3	p:0.0472209	pcorr:0.0472209	LZIC_MOUSEProtein LZIC OS=Mus musculus OX=10090 GN=Lzic PE=1 SV=1	Osclob_v00_mik.OX382165.1G456.1	TRINITY_DN1993_c0_g1_i1
2321844	F:0	M:3	p:0.0472209	pcorr:0.0472209	LZIC_MOUSEProtein LZIC OS=Mus musculus OX=10090 GN=Lzic PE=1 SV=1	Osclob_v00_mik.OX382165.1G456.1	TRINITY_DN1993_c0_g1_i5
2323493	F:0	M:3	p:0.0472209	pcorr:0.0472209	-	Osclob_v00_mik.OX382157.1G346.1	TRINITY_DN105878_c1_g1_i3
2325938	F:0	M:3	p:0.0472209	pcorr:0.0472209	-	Osclob_v00_mik.OX382150.1G1477.1	TRINITY_DN265654_c0_g1_i1
2328545	F:0	M:3	p:0.0472209	pcorr:0.0472209	-	*	TRINITY_DN119349_c0_g1_i2
2329183	F:0	M:3	p:0.0472209	pcorr:0.0472209	-	*	TRINITY_DN45813_c0_g1_i3
2329183	F:0	M:3	p:0.0472209	pcorr:0.0472209	-	*	TRINITY_DN45813_c0_g1_i9
2329183	F:0	M:3	p:0.0472209	pcorr:0.0472209	-	*	TRINITY_DN45813_c0_g1_i4
2329676	F:0	M:3	p:0.0472209	pcorr:0.0472209	-	Osclob_v00_mik.OX382150.1G2107.1	TRINITY_DN32264_c0_g1_i1
2329676	F:0	M:3	p:0.0472209	pcorr:0.0472209	-	Osclob_v00_mik.OX382150.1G2107.1	TRINITY_DN32264_c0_g1_i2
2329676	F:0	M:3	p:0.0472209	pcorr:0.0472209	BARK_DROMEProtein bark beetle OS=Drosophila melanogaster OX=7227 GN=bark PE=1 SV=1	Osclob_v00_mik.OX382159.1G440.1	TRINITY_DN108_c1_g2_i4
2329676	F:0	M:3	p:0.0472209	pcorr:0.0472209	BARK_DROMEProtein bark beetle OS=Drosophila melanogaster OX=7227 GN=bark PE=1 SV=1	Osclob_v00_mik.OX382159.1G440.1	TRINITY_DN108_c1_g2_i1
2329676	F:0	M:3	p:0.0472209	pcorr:0.0472209	BARK_DROMEProtein bark beetle OS=Drosophila melanogaster OX=7227 GN=bark PE=1 SV=1	Osclob_v00_mik.OX382159.1G440.1	TRINITY_DN108_c1_g2_i5
2329992	F:0	M:3	p:0.0472209	pcorr:0.0472209	M3K7_BOVINMitogen-activated protein kinase kinase kinase 7 OS=Bos taurus OX=9913 GN=MAP3K7 PE=2 SV=1	Osclob_v00_mik.OX382160.1G228.1	TRINITY_DN5739_c0_g1_i15
2329992	F:0	M:3	p:0.0472209	pcorr:0.0472209	M3K7_BOVINMitogen-activated protein kinase kinase kinase 7 OS=Bos taurus OX=9913 GN=MAP3K7 PE=2 SV=1	Osclob_v00_mik.OX382160.1G228.1	TRINITY_DN5739_c0_g1_i13
2329992	F:0	M:3	p:0.0472209	pcorr:0.0472209	M3K7_BOVINMitogen-activated protein kinase kinase kinase 7 OS=Bos taurus OX=9913 GN=MAP3K7 PE=2 SV=1	Osclob_v00_mik.OX382160.1G229.1	TRINITY_DN5739_c0_g1_i9
2329992	F:0	M:3	p:0.0472209	pcorr:0.0472209	M3K7_MOUSEMitogen-activated protein kinase kinase kinase 7 OS=Mus musculus OX=10090 GN=Map3k7 PE=1 SV=1	Osclob_v00_mik.OX382160.1G229.1	TRINITY_DN5739_c0_g1_i8
2329992	F:0	M:3	p:0.0472209	pcorr:0.0472209	M3K7_MOUSEMitogen-activated protein kinase kinase kinase 7 OS=Mus musculus OX=10090 GN=Map3k7 PE=1 SV=1	Osclob_v00_mik.OX382160.1G228.1	TRINITY_DN5739_c0_g1_i3
2332064	F:0	M:3	p:0.0472209	pcorr:0.0472209	-	Osclob_v00_mik.OX382161.1G598.2	TRINITY_DN10036_c0_g1_i19
2332064	F:0	M:3	p:0.0472209	pcorr:0.0472209	-	Osclob_v00_mik.OX382161.1G666.1	TRINITY_DN10036_c0_g1_i13
2332064	F:0	M:3	p:0.0472209	pcorr:0.0472209	-	Osclob_v00_mik.OX382161.1G584.2	TRINITY_DN10036_c0_g1_i16
2332064	F:0	M:3	p:0.0472209	pcorr:0.0472209	-	Osclob_v00_mik.OX382161.1G666.1	TRINITY_DN10036_c0_g1_i11
2332064	F:0	M:3	p:0.0472209	pcorr:0.0472209	-	Osclob_v00_mik.OX382155.1G514.1	TRINITY_DN10036_c0_g1_i7
2332806	F:0	M:3	p:0.0472209	pcorr:0.0472209	TITIN_HUMANTitin OS=Homo sapiens OX=9606 GN=TTN PE=1 SV=4	Osclob_v00_mik.OX382150.1G909.1	TRINITY_DN15636_c0_g1_i1
2332806	F:0	M:3	p:0.0472209	pcorr:0.0472209	SDK2_HUMANProtein sidekick-2 OS=Homo sapiens OX=9606 GN=SDK2 PE=1 SV=3	Osclob_v00_mik.OX382150.1G909.1	TRINITY_DN4679_c0_g1_i17
2332806	F:0	M:3	p:0.0472209	pcorr:0.0472209	CNTN1_HUMANContactin-1 OS=Homo sapiens OX=9606 GN=CNTN1 PE=1 SV=1	Osclob_v00_mik.OX382150.1G909.1	TRINITY_DN4679_c0_g1_i7
2332806	F:0	M:3	p:0.0472209	pcorr:0.0472209	SDK2_HUMANProtein sidekick-2 OS=Homo sapiens OX=9606 GN=SDK2 PE=1 SV=3	Osclob_v00_mik.OX382150.1G909.1	TRINITY_DN4679_c0_g1_i12
2332806	F:0	M:3	p:0.0472209	pcorr:0.0472209	SDK2_HUMANProtein sidekick-2 OS=Homo sapiens OX=9606 GN=SDK2 PE=1 SV=3	Osclob_v00_mik.OX382150.1G909.1	TRINITY_DN4679_c0_g1_i5
2333617	F:0	M:3	p:0.0472209	pcorr:0.0472209	MRP7_MOUSEATP-binding cassette sub-family C member 10 OS=Mus musculus OX=10090 GN=Abcc10 PE=1 SV=1	Osclob_v00_mik.OX382153.1G919.1	TRINITY_DN628_c0_g1_i3
2333617	F:0	M:3	p:0.0472209	pcorr:0.0472209	MRP7_MOUSEATP-binding cassette sub-family C member 10 OS=Mus musculus OX=10090 GN=Abcc10 PE=1 SV=1	Osclob_v00_mik.OX382153.1G919.1	TRINITY_DN628_c0_g1_i3
2333617	F:0	M:3	p:0.0472209	pcorr:0.0472209	MRP7_MOUSEATP-binding cassette sub-family C member 10 OS=Mus musculus OX=10090 GN=Abcc10 PE=1 SV=1	Osclob_v00_mik.OX382153.1G919.2	TRINITY_DN628_c0_g1_i12
2333617	F:0	M:3	p:0.0472209	pcorr:0.0472209	MRP7_MOUSEATP-binding cassette sub-family C member 10 OS=Mus musculus OX=10090 GN=Abcc10 PE=1 SV=1	Osclob_v00_mik.OX382153.1G919.2	TRINITY_DN628_c0_g1_i12
2333617	F:0	M:3	p:0.0472209	pcorr:0.0472209	MRP7_MOUSEATP-binding cassette sub-family C member 10 OS=Mus musculus OX=10090 GN=Abcc10 PE=1 SV=1	Osclob_v00_mik.OX382153.1G919.2	TRINITY_DN628_c0_g1_i14
2333617	F:0	M:3	p:0.0472209	pcorr:0.0472209	MRP7_MOUSEATP-binding cassette sub-family C member 10 OS=Mus musculus OX=10090 GN=Abcc10 PE=1 SV=1	Osclob_v00_mik.OX382153.1G919.2	TRINITY_DN628_c0_g1_i14
2333617	F:0	M:3	p:0.0472209	pcorr:0.0472209	MRP7_MOUSEATP-binding cassette sub-family C member 10 OS=Mus musculus OX=10090 GN=Abcc10 PE=1 SV=1	Osclob_v00_mik.OX382153.1G919.1	TRINITY_DN628_c0_g1_i10
2333617	F:0	M:3	p:0.0472209	pcorr:0.0472209	MRP7_MOUSEATP-binding cassette sub-family C member 10 OS=Mus musculus OX=10090 GN=Abcc10 PE=1 SV=1	Osclob_v00_mik.OX382153.1G919.1	TRINITY_DN628_c0_g1_i10
2333617	F:0	M:3	p:0.0472209	pcorr:0.0472209	MRP7_HUMANATP-binding cassette sub-family C member 10 OS=Homo sapiens OX=9606 GN=ABCC10 PE=1 SV=1	Osclob_v00_mik.OX382153.1G919.1	TRINITY_DN628_c0_g1_i18
2333617	F:0	M:3	p:0.0472209	pcorr:0.0472209	MRP7_HUMANATP-binding cassette sub-family C member 10 OS=Homo sapiens OX=9606 GN=ABCC10 PE=1 SV=1	Osclob_v00_mik.OX382153.1G919.1	TRINITY_DN628_c0_g1_i18
2335046	F:0	M:3	p:0.0472209	pcorr:0.0472209	SEPT3_MOUSENeuronal-specific septin-3 OS=Mus musculus OX=10090 GN=Septin3 PE=1 SV=2	Osclob_v00_mik.OX382151.1G205.1	TRINITY_DN10255_c0_g1_i8
2335046	F:0	M:3	p:0.0472209	pcorr:0.0472209	SEPT3_BOVINNeuronal-specific septin-3 OS=Bos taurus OX=9913 GN=SEPTIN3 PE=2 SV=3	Osclob_v00_mik.OX382151.1G205.1	TRINITY_DN10255_c0_g1_i13
2335046	F:0	M:3	p:0.0472209	pcorr:0.0472209	SEPT3_BOVINNeuronal-specific septin-3 OS=Bos taurus OX=9913 GN=SEPTIN3 PE=2 SV=3	Osclob_v00_mik.OX382151.1G205.1	TRINITY_DN10255_c0_g1_i9
2335046	F:0	M:3	p:0.0472209	pcorr:0.0472209	SEPT3_MOUSENeuronal-specific septin-3 OS=Mus musculus OX=10090 GN=Septin3 PE=1 SV=2	Osclob_v00_mik.OX382151.1G205.1	TRINITY_DN10255_c0_g1_i2
2335046	F:0	M:3	p:0.0472209	pcorr:0.0472209	SEPT3_BOVINNeuronal-specific septin-3 OS=Bos taurus OX=9913 GN=SEPTIN3 PE=2 SV=3	Osclob_v00_mik.OX382151.1G205.1	TRINITY_DN10255_c0_g1_i4
2335554	F:0	M:3	p:0.0472209	pcorr:0.0472209	HIPL2_HUMANHHIP-like protein 2 OS=Homo sapiens OX=9606 GN=HHIPL2 PE=1 SV=1	Osclob_v00_mik.OX382150.1G200.2	TRINITY_DN3756_c0_g1_i17
2335554	F:0	M:3	p:0.0472209	pcorr:0.0472209	HIPL2_HUMANHHIP-like protein 2 OS=Homo sapiens OX=9606 GN=HHIPL2 PE=1 SV=1	Osclob_v00_mik.OX382150.1G200.1	TRINITY_DN3756_c0_g1_i1
2335554	F:0	M:3	p:0.0472209	pcorr:0.0472209	HIPL2_HUMANHHIP-like protein 2 OS=Homo sapiens OX=9606 GN=HHIPL2 PE=1 SV=1	Osclob_v00_mik.OX382150.1G200.1	TRINITY_DN3756_c0_g1_i12
2335554	F:0	M:3	p:0.0472209	pcorr:0.0472209	HIPL2_HUMANHHIP-like protein 2 OS=Homo sapiens OX=9606 GN=HHIPL2 PE=1 SV=1	Osclob_v00_mik.OX382150.1G200.1	TRINITY_DN3756_c0_g1_i19
2335554	F:0	M:3	p:0.0472209	pcorr:0.0472209	HIPL1_HUMANHHIP-like protein 1 OS=Homo sapiens OX=9606 GN=HHIPL1 PE=1 SV=2	Osclob_v00_mik.OX382150.1G200.2	TRINITY_DN3756_c0_g1_i14
2337561	F:0	M:3	p:0.0472209	pcorr:0.0472209	-	Osclob_v00_mik.OX382153.1G322.1	TRINITY_DN28046_c0_g2_i1
2340251	F:0	M:3	p:0.0472209	pcorr:0.0472209	CTHR1_HUMANCollagen triple helix repeat-containing protein 1 OS=Homo sapiens OX=9606 GN=CTHRC1 PE=1 SV=1	Osclob_v00_mik.OX382158.1G378.1	TRINITY_DN2184_c0_g1_i3
2340251	F:0	M:3	p:0.0472209	pcorr:0.0472209	CTHR1_HUMANCollagen triple helix repeat-containing protein 1 OS=Homo sapiens OX=9606 GN=CTHRC1 PE=1 SV=1	Osclob_v00_mik.OX382154.1G779.2	TRINITY_DN2184_c0_g1_i13
2340251	F:0	M:3	p:0.0472209	pcorr:0.0472209	CTHR1_HUMANCollagen triple helix repeat-containing protein 1 OS=Homo sapiens OX=9606 GN=CTHRC1 PE=1 SV=1	Osclob_v00_mik.OX382166.1G66.1	TRINITY_DN2184_c0_g1_i5
2340251	F:0	M:3	p:0.0472209	pcorr:0.0472209	-	Osclob_v00_mik.OX382166.1G72.1	TRINITY_DN2184_c0_g1_i15
2340251	F:0	M:3	p:0.0472209	pcorr:0.0472209	-	Osclob_v00_mik.OX382150.1G1609.1	TRINITY_DN2184_c0_g1_i6
2341144	F:0	M:3	p:0.0472209	pcorr:0.0472209	TTLL6_DANRETubulin polyglutamylase ttll6 OS=Danio rerio OX=7955 GN=ttll6 PE=2 SV=1	Osclob_v00_mik.OX382159.1G141.1	TRINITY_DN1791_c0_g1_i5
2341144	F:0	M:3	p:0.0472209	pcorr:0.0472209	TTLL6_DANRETubulin polyglutamylase ttll6 OS=Danio rerio OX=7955 GN=ttll6 PE=2 SV=1	Osclob_v00_mik.OX382159.1G141.1	TRINITY_DN1791_c0_g1_i2
2352805	F:0	M:3	p:0.0472209	pcorr:0.0472209	OXA1L_HUMANMitochondrial inner membrane protein OXA1L OS=Homo sapiens OX=9606 GN=OXA1L PE=1 SV=3	Osclob_v00_mik.OX382152.1G852.1	TRINITY_DN8318_c0_g1_i10
2352805	F:0	M:3	p:0.0472209	pcorr:0.0472209	OXA1L_HUMANMitochondrial inner membrane protein OXA1L OS=Homo sapiens OX=9606 GN=OXA1L PE=1 SV=3	Osclob_v00_mik.OX382152.1G852.1	TRINITY_DN8318_c0_g1_i7
2352805	F:0	M:3	p:0.0472209	pcorr:0.0472209	OXA1L_HUMANMitochondrial inner membrane protein OXA1L OS=Homo sapiens OX=9606 GN=OXA1L PE=1 SV=3	Osclob_v00_mik.OX382152.1G852.1	TRINITY_DN8318_c0_g1_i13
2352805	F:0	M:3	p:0.0472209	pcorr:0.0472209	TTC5_HUMANTetratricopeptide repeat protein 5 OS=Homo sapiens OX=9606 GN=TTC5 PE=1 SV=2	Osclob_v00_mik.OX382152.1G845.1	TRINITY_DN8318_c0_g1_i8
2352805	F:0	M:3	p:0.0472209	pcorr:0.0472209	TTC5_HUMANTetratricopeptide repeat protein 5 OS=Homo sapiens OX=9606 GN=TTC5 PE=1 SV=2	Osclob_v00_mik.OX382152.1G845.1	TRINITY_DN8318_c0_g1_i2
2356175	F:0	M:3	p:0.0472209	pcorr:0.0472209	BOC_MOUSEBrother of CDO OS=Mus musculus OX=10090 GN=Boc PE=1 SV=2	Osclob_v00_mik.OX382169.1G260.1	TRINITY_DN11128_c0_g1_i4
2356175	F:0	M:3	p:0.0472209	pcorr:0.0472209	BOC_MOUSEBrother of CDO OS=Mus musculus OX=10090 GN=Boc PE=1 SV=2	Osclob_v00_mik.OX382169.1G260.1	TRINITY_DN11128_c0_g1_i10
2356175	F:0	M:3	p:0.0472209	pcorr:0.0472209	BOC_MOUSEBrother of CDO OS=Mus musculus OX=10090 GN=Boc PE=1 SV=2	Osclob_v00_mik.OX382169.1G260.1	TRINITY_DN11128_c0_g1_i7
2356175	F:0	M:3	p:0.0472209	pcorr:0.0472209	BOC_MOUSEBrother of CDO OS=Mus musculus OX=10090 GN=Boc PE=1 SV=2	Osclob_v00_mik.OX382169.1G260.1	TRINITY_DN11128_c0_g1_i5
2356175	F:0	M:3	p:0.0472209	pcorr:0.0472209	BOC_MOUSEBrother of CDO OS=Mus musculus OX=10090 GN=Boc PE=1 SV=2	Osclob_v00_mik.OX382169.1G260.1	TRINITY_DN11128_c0_g1_i3
2358990	F:0	M:3	p:0.0472209	pcorr:0.0472209	-	Osclob_v00_mik.OX382156.1G354.1	TRINITY_DN6430_c1_g1_i3
2359940	F:0	M:3	p:0.0472209	pcorr:0.0472209	DSCAM_CHICKCell adhesion molecule DSCAM OS=Gallus gallus OX=9031 GN=DSCAM PE=1 SV=3	Osclob_v00_mik.OX382150.1G1443.2	TRINITY_DN5714_c1_g1_i2
2359940	F:0	M:3	p:0.0472209	pcorr:0.0472209	DSCAM_CHICKCell adhesion molecule DSCAM OS=Gallus gallus OX=9031 GN=DSCAM PE=1 SV=3	Osclob_v00_mik.OX382150.1G1443.2	TRINITY_DN5714_c1_g1_i1
2362599	F:0	M:3	p:0.0472209	pcorr:0.0472209	AGRE5_BOVINAdhesion G protein-coupled receptor E5 OS=Bos taurus OX=9913 GN=ADGRE5 PE=2 SV=1	Osclob_v00_mik.OX382169.1G367.1	TRINITY_DN72_c0_g2_i6
2362599	F:0	M:3	p:0.0472209	pcorr:0.0472209	AGRE5_BOVINAdhesion G protein-coupled receptor E5 OS=Bos taurus OX=9913 GN=ADGRE5 PE=2 SV=1	Osclob_v00_mik.OX382169.1G367.1	TRINITY_DN72_c0_g2_i12
2362599	F:0	M:3	p:0.0472209	pcorr:0.0472209	AGRE5_BOVINAdhesion G protein-coupled receptor E5 OS=Bos taurus OX=9913 GN=ADGRE5 PE=2 SV=1	Osclob_v00_mik.OX382169.1G367.1	TRINITY_DN72_c0_g2_i4
2362599	F:0	M:3	p:0.0472209	pcorr:0.0472209	AGRE5_BOVINAdhesion G protein-coupled receptor E5 OS=Bos taurus OX=9913 GN=ADGRE5 PE=2 SV=1	Osclob_v00_mik.OX382169.1G367.1	TRINITY_DN72_c0_g2_i7
2362599	F:0	M:3	p:0.0472209	pcorr:0.0472209	AGRE5_BOVINAdhesion G protein-coupled receptor E5 OS=Bos taurus OX=9913 GN=ADGRE5 PE=2 SV=1	Osclob_v00_mik.OX382169.1G367.1	TRINITY_DN72_c0_g2_i1
2362974	F:0	M:3	p:0.0472209	pcorr:0.0472209	-	Osclob_v00_mik.OX382161.1G63.1	TRINITY_DN2344_c0_g1_i13
2362974	F:0	M:3	p:0.0472209	pcorr:0.0472209	HS12B_MOUSEHeat shock 70 kDa protein 12B OS=Mus musculus OX=10090 GN=Hspa12b PE=1 SV=1	Osclob_v00_mik.OX382161.1G63.1	TRINITY_DN2344_c0_g1_i5
2362974	F:0	M:3	p:0.0472209	pcorr:0.0472209	HS12B_MOUSEHeat shock 70 kDa protein 12B OS=Mus musculus OX=10090 GN=Hspa12b PE=1 SV=1	Osclob_v00_mik.OX382161.1G63.1	TRINITY_DN2344_c0_g1_i11
2362974	F:0	M:3	p:0.0472209	pcorr:0.0472209	HS12B_MOUSEHeat shock 70 kDa protein 12B OS=Mus musculus OX=10090 GN=Hspa12b PE=1 SV=1	Osclob_v00_mik.OX382161.1G72.1	TRINITY_DN2344_c0_g1_i10
2362974	F:0	M:3	p:0.0472209	pcorr:0.0472209	-	Osclob_v00_mik.OX382161.1G63.1	TRINITY_DN2344_c0_g1_i3
2364895	F:0	M:3	p:0.0472209	pcorr:0.0472209	PIF1_DANREATP-dependent DNA helicase PIF1 OS=Danio rerio OX=7955 GN=pif1 PE=2 SV=1	Osclob_v00_mik.OX382150.1G1221.1	TRINITY_DN6283_c0_g1_i6
2364895	F:0	M:3	p:0.0472209	pcorr:0.0472209	PIF1_MOUSEATP-dependent DNA helicase PIF1 OS=Mus musculus OX=10090 GN=Pif1 PE=1 SV=2	Osclob_v00_mik.OX382164.1G273.1	TRINITY_DN6283_c0_g1_i8
2364895	F:0	M:3	p:0.0472209	pcorr:0.0472209	PIF1_MOUSEATP-dependent DNA helicase PIF1 OS=Mus musculus OX=10090 GN=Pif1 PE=1 SV=2	Osclob_v00_mik.OX382164.1G273.1	TRINITY_DN6283_c0_g1_i14
[truncated: 667 more rows]

## Sheet: E. Petrosia ficiformis
RADSEX_tag	N of M	N of F	p_value	Corrected p_value	BLAST both in genome/transcriptome	Gene_ID	Transcript_ID in trinity transcriptome
[truncated: 8,407 more rows]

## Sheet: F. Phakellia ventilabrum
RADSEX_tag	N of M	N of F	p_value	Corrected p_value	BLAST both in genome/transcriptome	Gene_ID	Transcript_ID in trinity transcriptome
[truncated: 2,084 more rows]

[truncated: 4 more sheets: G. Halichondria panicea, H. Axinella damicornis, I. Geodia barretti, J. Geodia hentscheli]
