# Supplementary material for: Sponge genomes reveal a pre-metazoan origin of the sex determination toolkit and sex chromosomes
Source: Research Square preprint supplement (doi:10.21203/rs.3.rs-8554461/v1), 2026-02-12
Supplement: Supplementary file 18 [file de6b84e7aeec98adc9a9dd02.xlsx]

## Sheet: Summary
Welch two-sample T-test to test for differences in gene expression between males and females in genes with sex-specific loci with and without isoforms
	with isoforms					without isoforms
	t	df	p-value	mean Exp females	mean Exp males	t	df	p-value	mean Exp females	mean Exp males
Chondrosia reniformis	2.865	223.29	0.004568	1454.29	758.954	1.1856	446.99	0.2364	2785.12	1677.09
Oscarella lobularis	-0.064919	1807.3	0.9947	3414.9	3474.82	-1.3435	109.22	0.1819	3138.82	6618.19
Petrosia ficiformis	1.5929	3419.9	0.1113	319.303	268.615	-1.1663	557.9	0.244	381.232	583.163
Axinella damicornis	-0.10293	922.99	0.918	326.78	332.963	-0.22252	75.969	0.8245	620.701	703.231
Phakellia ventilabrum	-0.32439	562.47	0.7458	482.928	528.291	-0.9296	128	0.3543	450	670.256
Halichondria panicea	-1.2177	414.87	0.224	65.5124	83.5396	-0.95554	53.764	0.3436	149.225	215.225

## Sheet: A. Oscarella lobularis
					Female (TPMs)				Male (TPMs)
Chr	Gene_ID	Transcript_ID	Exon_ID	ref_gene_id	Osc_10_nap_F	Osc_11_nap_F	Osc_13_nap_M	Osc_4_nap_F	Olob1_M	Olob2_M	Olob5_nap_M	Osc3_M	Osc5_M	AVERAGE_F	AVERAGE_M	Sex-specific	RADSEX_loci	BLAST
OX382150.1	MSTRG.49	Osclob_v00_mik.OX382150.1G53.1	MSTRG.49.1	Osclob_v00_mik.OX382150.1G53	315	80	0	75	1208	14	634	754	924	117.5	706.8	MALE	3013276	BRCA2_HUMANBreast cancer type 2 susceptibility protein OS=Homo sapiens OX=9606 GN=BRCA2 PE=1 SV=4
OX382150.1	MSTRG.49	Osclob_v00_mik.OX382150.1G53.1	MSTRG.49.2	Osclob_v00_mik.OX382150.1G53	4949	6801	9258	5752	22098	13413	10456	14436	11313	6690	14343.2	MALE	3013276	BRCA2_HUMANBreast cancer type 2 susceptibility protein OS=Homo sapiens OX=9606 GN=BRCA2 PE=1 SV=4
OX382150.1	MSTRG.49	Osclob_v00_mik.OX382150.1G53.1	MSTRG.49.3	Osclob_v00_mik.OX382150.1G53	4	0	0	0	2252	0	37	1209	529	1	805.4	MALE	3013276	BRCA2_HUMANBreast cancer type 2 susceptibility protein OS=Homo sapiens OX=9606 GN=BRCA2 PE=1 SV=4
OX382150.1	MSTRG.49	Osclob_v00_mik.OX382150.1G53.1	MSTRG.49.4	Osclob_v00_mik.OX382150.1G53	0	18	35	0	63	2	318	59	739	13.25	236.2	MALE	3013276	BRCA2_HUMANBreast cancer type 2 susceptibility protein OS=Homo sapiens OX=9606 GN=BRCA2 PE=1 SV=4
OX382150.1	MSTRG.49	Osclob_v00_mik.OX382150.1G53.1	MSTRG.49.5	Osclob_v00_mik.OX382150.1G53	61	0	0	3	153	0	176	1475	134	16	387.6	MALE	3013276	BRCA2_HUMANBreast cancer type 2 susceptibility protein OS=Homo sapiens OX=9606 GN=BRCA2 PE=1 SV=4
OX382150.1	MSTRG.49	Osclob_v00_mik.OX382150.1G53.1	MSTRG.49.6	Osclob_v00_mik.OX382150.1G53	0	0	0	0	166	0	56	371	163	0	151.2	MALE	3013276	BRCA2_HUMANBreast cancer type 2 susceptibility protein OS=Homo sapiens OX=9606 GN=BRCA2 PE=1 SV=4
OX382150.1	MSTRG.49	Osclob_v00_mik.OX382150.1G53.1	MSTRG.49.7	Osclob_v00_mik.OX382150.1G53	0	10	1	0	20	0	136	42	382	2.75	116	MALE	3013276	BRCA2_HUMANBreast cancer type 2 susceptibility protein OS=Homo sapiens OX=9606 GN=BRCA2 PE=1 SV=4
OX382150.1	MSTRG.49	Osclob_v00_mik.OX382150.1G53.1	MSTRG.49.8	Osclob_v00_mik.OX382150.1G53	33	24	25	27	1376	0	24	525	212	27.25	427.4	MALE	3013276	BRCA2_HUMANBreast cancer type 2 susceptibility protein OS=Homo sapiens OX=9606 GN=BRCA2 PE=1 SV=4
OX382150.1	MSTRG.49	Osclob_v00_mik.OX382150.1G53.1	MSTRG.49.11	Osclob_v00_mik.OX382150.1G53	1	2	30	0	2	0	5	10	17	8.25	6.8	MALE	3013276	BRCA2_HUMANBreast cancer type 2 susceptibility protein OS=Homo sapiens OX=9606 GN=BRCA2 PE=1 SV=4
OX382150.1	MSTRG.49	Osclob_v00_mik.OX382150.1G53.1	MSTRG.49.12	Osclob_v00_mik.OX382150.1G53	0	0	41	3	13	0	1	20	29	11	12.6	MALE	3013276	BRCA2_HUMANBreast cancer type 2 susceptibility protein OS=Homo sapiens OX=9606 GN=BRCA2 PE=1 SV=4
OX382150.1	MSTRG.49	Osclob_v00_mik.OX382150.1G53.1	MSTRG.49.16	Osclob_v00_mik.OX382150.1G53	0	250	0	797	179	152	324	160	0	261.75	163	MALE	3013276	BRCA2_HUMANBreast cancer type 2 susceptibility protein OS=Homo sapiens OX=9606 GN=BRCA2 PE=1 SV=4
OX382150.1	MSTRG.49	Osclob_v00_mik.OX382150.1G53.1	MSTRG.49.19	Osclob_v00_mik.OX382150.1G53	17	4	16	9	0	0	0	13	111	11.5	24.8	MALE	3013276	BRCA2_HUMANBreast cancer type 2 susceptibility protein OS=Homo sapiens OX=9606 GN=BRCA2 PE=1 SV=4
OX382150.1	MSTRG.49	Osclob_v00_mik.OX382150.1G53.1	MSTRG.49.20	Osclob_v00_mik.OX382150.1G53	0	11	0	1	1237	0	36	72	125	3	294	MALE	3013276	BRCA2_HUMANBreast cancer type 2 susceptibility protein OS=Homo sapiens OX=9606 GN=BRCA2 PE=1 SV=4
OX382150.1	MSTRG.49	Osclob_v00_mik.OX382150.1G53.1	MSTRG.49.21	Osclob_v00_mik.OX382150.1G53	0	0	0	0	588	0	19	65	73	0	149	MALE	3013276	BRCA2_HUMANBreast cancer type 2 susceptibility protein OS=Homo sapiens OX=9606 GN=BRCA2 PE=1 SV=4
OX382150.1	MSTRG.49	Osclob_v00_mik.OX382150.1G53.1	MSTRG.49.22	Osclob_v00_mik.OX382150.1G53	1	0	0	0	2229	0	102	1633	2817	0.25	1356.2	MALE	3013276	BRCA2_HUMANBreast cancer type 2 susceptibility protein OS=Homo sapiens OX=9606 GN=BRCA2 PE=1 SV=4
OX382150.1	MSTRG.49	Osclob_v00_mik.OX382150.1G53.1	MSTRG.49.23	Osclob_v00_mik.OX382150.1G53	190	0	5	0	5	391	0	3	5	48.75	80.8	MALE	3013276	BRCA2_HUMANBreast cancer type 2 susceptibility protein OS=Homo sapiens OX=9606 GN=BRCA2 PE=1 SV=4
OX382150.1	MSTRG.49	Osclob_v00_mik.OX382150.1G53.1	MSTRG.49.24	Osclob_v00_mik.OX382150.1G53	3	0	5	0	25	744	1	5	10	2	157	MALE	3013276	BRCA2_HUMANBreast cancer type 2 susceptibility protein OS=Homo sapiens OX=9606 GN=BRCA2 PE=1 SV=4
OX382150.1	MSTRG.49	Osclob_v00_mik.OX382150.1G53.1	MSTRG.49.25	Osclob_v00_mik.OX382150.1G53	7	37	3	0	72	45	12	69	6	11.75	40.8	MALE	3013276	BRCA2_HUMANBreast cancer type 2 susceptibility protein OS=Homo sapiens OX=9606 GN=BRCA2 PE=1 SV=4
OX382150.1	MSTRG.49	Osclob_v00_mik.OX382150.1G53.1	MSTRG.49.26	Osclob_v00_mik.OX382150.1G53	5	2	4	0	81	6	0	28	9	2.75	24.8	MALE	3013276	BRCA2_HUMANBreast cancer type 2 susceptibility protein OS=Homo sapiens OX=9606 GN=BRCA2 PE=1 SV=4
OX382150.1	MSTRG.49	Osclob_v00_mik.OX382150.1G53.1	MSTRG.49.27	Osclob_v00_mik.OX382150.1G53	6	3	9	20	60	22	0	14	102	9.5	39.6	MALE	3013276	BRCA2_HUMANBreast cancer type 2 susceptibility protein OS=Homo sapiens OX=9606 GN=BRCA2 PE=1 SV=4
OX382150.1	MSTRG.49	Osclob_v00_mik.OX382150.1G53.1	MSTRG.49.28	Osclob_v00_mik.OX382150.1G53	28	12	27	15	6	17	0	68	139	20.5	46	MALE	3013276	BRCA2_HUMANBreast cancer type 2 susceptibility protein OS=Homo sapiens OX=9606 GN=BRCA2 PE=1 SV=4
OX382150.1	MSTRG.49	Osclob_v00_mik.OX382150.1G53.1	MSTRG.49.29	Osclob_v00_mik.OX382150.1G53	68	39	122	0	10	0	0	48	166	57.25	44.8	MALE	3013276	BRCA2_HUMANBreast cancer type 2 susceptibility protein OS=Homo sapiens OX=9606 GN=BRCA2 PE=1 SV=4
OX382150.1	MSTRG.49	Osclob_v00_mik.OX382150.1G53.1	MSTRG.49.30	Osclob_v00_mik.OX382150.1G53	28	1	20	1	1	1	1	7	3	12.5	2.6	MALE	3013276	BRCA2_HUMANBreast cancer type 2 susceptibility protein OS=Homo sapiens OX=9606 GN=BRCA2 PE=1 SV=4
OX382150.1	MSTRG.49	Osclob_v00_mik.OX382150.1G53.1	MSTRG.49.31	Osclob_v00_mik.OX382150.1G53	0	0	684	201	830	408	812	220	1009	221.25	655.8	MALE	3013276	BRCA2_HUMANBreast cancer type 2 susceptibility protein OS=Homo sapiens OX=9606 GN=BRCA2 PE=1 SV=4
OX382150.1	MSTRG.49	Osclob_v00_mik.OX382150.1G53.1	MSTRG.49.32	Osclob_v00_mik.OX382150.1G53	68	64	100	74	475	2902	838	1234	211	76.5	1132	MALE	3013276	BRCA2_HUMANBreast cancer type 2 susceptibility protein OS=Homo sapiens OX=9606 GN=BRCA2 PE=1 SV=4
OX382150.1	MSTRG.49	Osclob_v00_mik.OX382150.1G53.1	MSTRG.49.33	Osclob_v00_mik.OX382150.1G53	2	2	0	1	72	41	468	16	20	1.25	123.4	MALE	3013276	BRCA2_HUMANBreast cancer type 2 susceptibility protein OS=Homo sapiens OX=9606 GN=BRCA2 PE=1 SV=4
OX382150.1	MSTRG.49	Osclob_v00_mik.OX382150.1G53.1	MSTRG.49.34	Osclob_v00_mik.OX382150.1G53	0	4	1	0	141	223	93	37	32	1.25	105.2	MALE	3013276	BRCA2_HUMANBreast cancer type 2 susceptibility protein OS=Homo sapiens OX=9606 GN=BRCA2 PE=1 SV=4
OX382150.1	MSTRG.70	Osclob_v00_mik.OX382150.1G74.1	MSTRG.70.1	Osclob_v00_mik.OX382150.1G74	193	1195	1865	1450	3871	2500	1434	5924	2123	1175.75	3170.4	MALE	2729364	IRAK4_HUMANInterleukin-1 receptor-associated kinase 4 OS=Homo sapiens OX=9606 GN=IRAK4 PE=1 SV=1
OX382150.1	MSTRG.70	Osclob_v00_mik.OX382150.1G74.1	MSTRG.70.2	Osclob_v00_mik.OX382150.1G74	0	0	0	0	0	0	0	0	0	0	0	MALE	2729364	IRAK4_HUMANInterleukin-1 receptor-associated kinase 4 OS=Homo sapiens OX=9606 GN=IRAK4 PE=1 SV=1
OX382150.1	MSTRG.70	Osclob_v00_mik.OX382150.1G74.1	MSTRG.70.3	Osclob_v00_mik.OX382150.1G74	0	0	0	0	148	0	0	46	943	0	227.4	MALE	2729364	IRAK4_HUMANInterleukin-1 receptor-associated kinase 4 OS=Homo sapiens OX=9606 GN=IRAK4 PE=1 SV=1
OX382150.1	MSTRG.70	Osclob_v00_mik.OX382150.1G74.1	MSTRG.70.4	Osclob_v00_mik.OX382150.1G74	1351	481	7143	1085	10719	1411	2084	6799	496	2515	4301.8	MALE	2729364	IRAK4_HUMANInterleukin-1 receptor-associated kinase 4 OS=Homo sapiens OX=9606 GN=IRAK4 PE=1 SV=1
OX382150.1	MSTRG.70	Osclob_v00_mik.OX382150.1G74.1	MSTRG.70.5	Osclob_v00_mik.OX382150.1G74	1976	0	2	0	584	11	2027	7	0	494.5	525.8	MALE	2729364	IRAK4_HUMANInterleukin-1 receptor-associated kinase 4 OS=Homo sapiens OX=9606 GN=IRAK4 PE=1 SV=1
OX382150.1	MSTRG.70	Osclob_v00_mik.OX382150.1G74.1	MSTRG.70.6	Osclob_v00_mik.OX382150.1G74	39	0	229	0	79	72	89	151	28	67	83.8	MALE	2729364	IRAK4_HUMANInterleukin-1 receptor-associated kinase 4 OS=Homo sapiens OX=9606 GN=IRAK4 PE=1 SV=1
OX382150.1	MSTRG.70	Osclob_v00_mik.OX382150.1G74.1	MSTRG.70.10	Osclob_v00_mik.OX382150.1G74	83	171	1667	51	609	0	521	1357	86	493	514.6	MALE	2729364	IRAK4_HUMANInterleukin-1 receptor-associated kinase 4 OS=Homo sapiens OX=9606 GN=IRAK4 PE=1 SV=1
OX382150.1	MSTRG.70	Osclob_v00_mik.OX382150.1G74.1	MSTRG.70.11	Osclob_v00_mik.OX382150.1G74	0	0	78	0	920	0	0	1544	892	19.5	671.2	MALE	2729364	IRAK4_HUMANInterleukin-1 receptor-associated kinase 4 OS=Homo sapiens OX=9606 GN=IRAK4 PE=1 SV=1
OX382150.1	MSTRG.70	Osclob_v00_mik.OX382150.1G74.1	MSTRG.70.12	Osclob_v00_mik.OX382150.1G74	846	289	0	1400	3722	1901	0	3302	2409	633.75	2266.8	MALE	2729364	IRAK4_HUMANInterleukin-1 receptor-associated kinase 4 OS=Homo sapiens OX=9606 GN=IRAK4 PE=1 SV=1
OX382150.1	MSTRG.70	Osclob_v00_mik.OX382150.1G74.1	MSTRG.70.13	Osclob_v00_mik.OX382150.1G74	213	212	56	95	155	458	80	419	393	144	301	MALE	2729364	IRAK4_HUMANInterleukin-1 receptor-associated kinase 4 OS=Homo sapiens OX=9606 GN=IRAK4 PE=1 SV=1
OX382150.1	MSTRG.70	Osclob_v00_mik.OX382150.1G74.1	MSTRG.70.14	Osclob_v00_mik.OX382150.1G74	0	8	31	4	338	55	242	361	28	10.75	204.8	MALE	2729364	IRAK4_HUMANInterleukin-1 receptor-associated kinase 4 OS=Homo sapiens OX=9606 GN=IRAK4 PE=1 SV=1
OX382150.1	MSTRG.70	Osclob_v00_mik.OX382150.1G74.1	MSTRG.70.16	Osclob_v00_mik.OX382150.1G74	0	0	602	0	818	214	2623	1097	56	150.5	961.6	MALE	2729364	IRAK4_HUMANInterleukin-1 receptor-associated kinase 4 OS=Homo sapiens OX=9606 GN=IRAK4 PE=1 SV=1
OX382150.1	MSTRG.70	Osclob_v00_mik.OX382150.1G74.1	MSTRG.70.17	Osclob_v00_mik.OX382150.1G74	6	21	0	0	11462	0	42	7516	7	6.75	3805.4	MALE	2729364	IRAK4_HUMANInterleukin-1 receptor-associated kinase 4 OS=Homo sapiens OX=9606 GN=IRAK4 PE=1 SV=1
OX382150.1	MSTRG.70	Osclob_v00_mik.OX382150.1G74.1	MSTRG.70.18	Osclob_v00_mik.OX382150.1G74	0	0	1289	0	5939	0	0	3975	0	322.25	1982.8	MALE	2729364	IRAK4_HUMANInterleukin-1 receptor-associated kinase 4 OS=Homo sapiens OX=9606 GN=IRAK4 PE=1 SV=1
OX382150.1	MSTRG.70	Osclob_v00_mik.OX382150.1G74.1	MSTRG.70.19	Osclob_v00_mik.OX382150.1G74	0	0	0	0	10072	0	328	7907	0	0	3661.4	MALE	2729364	IRAK4_HUMANInterleukin-1 receptor-associated kinase 4 OS=Homo sapiens OX=9606 GN=IRAK4 PE=1 SV=1
OX382150.1	MSTRG.70	Osclob_v00_mik.OX382150.1G74.1	MSTRG.70.20	Osclob_v00_mik.OX382150.1G74	77	0	370	0	38	0	58	41	0	111.75	27.4	MALE	2729364	IRAK4_HUMANInterleukin-1 receptor-associated kinase 4 OS=Homo sapiens OX=9606 GN=IRAK4 PE=1 SV=1
OX382150.1	MSTRG.70	Osclob_v00_mik.OX382150.1G74.1	MSTRG.70.23	Osclob_v00_mik.OX382150.1G74	0	0	0	0	425	0	0	22	0	0	89.4	MALE	2729364	IRAK4_HUMANInterleukin-1 receptor-associated kinase 4 OS=Homo sapiens OX=9606 GN=IRAK4 PE=1 SV=1
OX382150.1	MSTRG.70	Osclob_v00_mik.OX382150.1G74.1	MSTRG.70.25	Osclob_v00_mik.OX382150.1G74	0	0	0	0	676	0	0	276	0	0	190.4	MALE	2729364	IRAK4_HUMANInterleukin-1 receptor-associated kinase 4 OS=Homo sapiens OX=9606 GN=IRAK4 PE=1 SV=1
OX382150.1	MSTRG.70	Osclob_v00_mik.OX382150.1G74.1	MSTRG.70.26	Osclob_v00_mik.OX382150.1G74	578	455	4	1456	1848	3520	10	1325	2971	623.25	1934.8	MALE	2729364	IRAK4_HUMANInterleukin-1 receptor-associated kinase 4 OS=Homo sapiens OX=9606 GN=IRAK4 PE=1 SV=1
OX382150.1	MSTRG.70	Osclob_v00_mik.OX382150.1G74.1	MSTRG.70.29	Osclob_v00_mik.OX382150.1G74	0	13	0	53	0	47	0	0	74	16.5	24.2	MALE	2729364	IRAK4_HUMANInterleukin-1 receptor-associated kinase 4 OS=Homo sapiens OX=9606 GN=IRAK4 PE=1 SV=1
OX382150.1	MSTRG.70	Osclob_v00_mik.OX382150.1G74.1	MSTRG.70.30	Osclob_v00_mik.OX382150.1G74	0	0	0	0	13538	122	0	13549	284	0	5498.6	MALE	2729364	IRAK4_HUMANInterleukin-1 receptor-associated kinase 4 OS=Homo sapiens OX=9606 GN=IRAK4 PE=1 SV=1
OX382150.1	MSTRG.70	Osclob_v00_mik.OX382150.1G84.1	MSTRG.70.1	Osclob_v00_mik.OX382150.1G84	193	1195	1865	1450	3871	2500	1434	5924	2123	1175.75	3170.4	MALE	#N/A	#N/A
OX382150.1	MSTRG.70	Osclob_v00_mik.OX382150.1G84.1	MSTRG.70.2	Osclob_v00_mik.OX382150.1G84	0	0	0	0	0	0	0	0	0	0	0	MALE	#N/A	#N/A
OX382150.1	MSTRG.70	Osclob_v00_mik.OX382150.1G84.1	MSTRG.70.3	Osclob_v00_mik.OX382150.1G84	0	0	0	0	148	0	0	46	943	0	227.4	MALE	#N/A	#N/A
OX382150.1	MSTRG.70	Osclob_v00_mik.OX382150.1G84.1	MSTRG.70.4	Osclob_v00_mik.OX382150.1G84	1351	481	7143	1085	10719	1411	2084	6799	496	2515	4301.8	MALE	#N/A	#N/A
OX382150.1	MSTRG.70	Osclob_v00_mik.OX382150.1G84.1	MSTRG.70.5	Osclob_v00_mik.OX382150.1G84	1976	0	2	0	584	11	2027	7	0	494.5	525.8	MALE	#N/A	#N/A
OX382150.1	MSTRG.70	Osclob_v00_mik.OX382150.1G84.1	MSTRG.70.6	Osclob_v00_mik.OX382150.1G84	39	0	229	0	79	72	89	151	28	67	83.8	MALE	#N/A	#N/A
OX382150.1	MSTRG.70	Osclob_v00_mik.OX382150.1G84.1	MSTRG.70.10	Osclob_v00_mik.OX382150.1G84	83	171	1667	51	609	0	521	1357	86	493	514.6	MALE	#N/A	#N/A
OX382150.1	MSTRG.70	Osclob_v00_mik.OX382150.1G84.1	MSTRG.70.11	Osclob_v00_mik.OX382150.1G84	0	0	78	0	920	0	0	1544	892	19.5	671.2	MALE	#N/A	#N/A
OX382150.1	MSTRG.70	Osclob_v00_mik.OX382150.1G84.1	MSTRG.70.12	Osclob_v00_mik.OX382150.1G84	846	289	0	1400	3722	1901	0	3302	2409	633.75	2266.8	MALE	#N/A	#N/A
OX382150.1	MSTRG.70	Osclob_v00_mik.OX382150.1G84.1	MSTRG.70.13	Osclob_v00_mik.OX382150.1G84	213	212	56	95	155	458	80	419	393	144	301	MALE	#N/A	#N/A
OX382150.1	MSTRG.70	Osclob_v00_mik.OX382150.1G84.1	MSTRG.70.14	Osclob_v00_mik.OX382150.1G84	0	8	31	4	338	55	242	361	28	10.75	204.8	MALE	#N/A	#N/A
OX382150.1	MSTRG.70	Osclob_v00_mik.OX382150.1G84.1	MSTRG.70.16	Osclob_v00_mik.OX382150.1G84	0	0	602	0	818	214	2623	1097	56	150.5	961.6	MALE	#N/A	#N/A
OX382150.1	MSTRG.70	Osclob_v00_mik.OX382150.1G84.1	MSTRG.70.17	Osclob_v00_mik.OX382150.1G84	6	21	0	0	11462	0	42	7516	7	6.75	3805.4	MALE	#N/A	#N/A
OX382150.1	MSTRG.70	Osclob_v00_mik.OX382150.1G84.1	MSTRG.70.18	Osclob_v00_mik.OX382150.1G84	0	0	1289	0	5939	0	0	3975	0	322.25	1982.8	MALE	#N/A	#N/A
OX382150.1	MSTRG.70	Osclob_v00_mik.OX382150.1G84.1	MSTRG.70.19	Osclob_v00_mik.OX382150.1G84	0	0	0	0	10072	0	328	7907	0	0	3661.4	MALE	#N/A	#N/A
OX382150.1	MSTRG.70	Osclob_v00_mik.OX382150.1G84.1	MSTRG.70.20	Osclob_v00_mik.OX382150.1G84	77	0	370	0	38	0	58	41	0	111.75	27.4	MALE	#N/A	#N/A
OX382150.1	MSTRG.70	Osclob_v00_mik.OX382150.1G84.1	MSTRG.70.23	Osclob_v00_mik.OX382150.1G84	0	0	0	0	425	0	0	22	0	0	89.4	MALE	#N/A	#N/A
OX382150.1	MSTRG.70	Osclob_v00_mik.OX382150.1G84.1	MSTRG.70.25	Osclob_v00_mik.OX382150.1G84	0	0	0	0	676	0	0	276	0	0	190.4	MALE	#N/A	#N/A
OX382150.1	MSTRG.70	Osclob_v00_mik.OX382150.1G84.1	MSTRG.70.26	Osclob_v00_mik.OX382150.1G84	578	455	4	1456	1848	3520	10	1325	2971	623.25	1934.8	MALE	#N/A	#N/A
OX382150.1	MSTRG.70	Osclob_v00_mik.OX382150.1G84.1	MSTRG.70.29	Osclob_v00_mik.OX382150.1G84	0	13	0	53	0	47	0	0	74	16.5	24.2	MALE	#N/A	#N/A
OX382150.1	MSTRG.70	Osclob_v00_mik.OX382150.1G87.1	MSTRG.70.1	Osclob_v00_mik.OX382150.1G87	193	1195	1865	1450	3871	2500	1434	5924	2123	1175.75	3170.4	MALE	#N/A	#N/A
OX382150.1	MSTRG.70	Osclob_v00_mik.OX382150.1G87.1	MSTRG.70.2	Osclob_v00_mik.OX382150.1G87	0	0	0	0	0	0	0	0	0	0	0	MALE	#N/A	#N/A
OX382150.1	MSTRG.70	Osclob_v00_mik.OX382150.1G87.1	MSTRG.70.3	Osclob_v00_mik.OX382150.1G87	0	0	0	0	148	0	0	46	943	0	227.4	MALE	#N/A	#N/A
OX382150.1	MSTRG.70	Osclob_v00_mik.OX382150.1G87.1	MSTRG.70.4	Osclob_v00_mik.OX382150.1G87	1351	481	7143	1085	10719	1411	2084	6799	496	2515	4301.8	MALE	#N/A	#N/A
OX382150.1	MSTRG.70	Osclob_v00_mik.OX382150.1G87.1	MSTRG.70.5	Osclob_v00_mik.OX382150.1G87	1976	0	2	0	584	11	2027	7	0	494.5	525.8	MALE	#N/A	#N/A
OX382150.1	MSTRG.70	Osclob_v00_mik.OX382150.1G87.1	MSTRG.70.6	Osclob_v00_mik.OX382150.1G87	39	0	229	0	79	72	89	151	28	67	83.8	MALE	#N/A	#N/A
OX382150.1	MSTRG.70	Osclob_v00_mik.OX382150.1G87.1	MSTRG.70.10	Osclob_v00_mik.OX382150.1G87	83	171	1667	51	609	0	521	1357	86	493	514.6	MALE	#N/A	#N/A
OX382150.1	MSTRG.70	Osclob_v00_mik.OX382150.1G87.1	MSTRG.70.11	Osclob_v00_mik.OX382150.1G87	0	0	78	0	920	0	0	1544	892	19.5	671.2	MALE	#N/A	#N/A
OX382150.1	MSTRG.70	Osclob_v00_mik.OX382150.1G87.1	MSTRG.70.12	Osclob_v00_mik.OX382150.1G87	846	289	0	1400	3722	1901	0	3302	2409	633.75	2266.8	MALE	#N/A	#N/A
OX382150.1	MSTRG.70	Osclob_v00_mik.OX382150.1G87.1	MSTRG.70.13	Osclob_v00_mik.OX382150.1G87	213	212	56	95	155	458	80	419	393	144	301	MALE	#N/A	#N/A
OX382150.1	MSTRG.70	Osclob_v00_mik.OX382150.1G87.1	MSTRG.70.14	Osclob_v00_mik.OX382150.1G87	0	8	31	4	338	55	242	361	28	10.75	204.8	MALE	#N/A	#N/A
OX382150.1	MSTRG.70	Osclob_v00_mik.OX382150.1G87.1	MSTRG.70.16	Osclob_v00_mik.OX382150.1G87	0	0	602	0	818	214	2623	1097	56	150.5	961.6	MALE	#N/A	#N/A
OX382150.1	MSTRG.70	Osclob_v00_mik.OX382150.1G87.1	MSTRG.70.17	Osclob_v00_mik.OX382150.1G87	6	21	0	0	11462	0	42	7516	7	6.75	3805.4	MALE	#N/A	#N/A
OX382150.1	MSTRG.70	Osclob_v00_mik.OX382150.1G87.1	MSTRG.70.18	Osclob_v00_mik.OX382150.1G87	0	0	1289	0	5939	0	0	3975	0	322.25	1982.8	MALE	#N/A	#N/A
OX382150.1	MSTRG.144	Osclob_v00_mik.OX382150.1G165.1	MSTRG.144.1	Osclob_v00_mik.OX382150.1G165	0	0	0	0	8896	0	11	2206	0	0	2222.6	MALE	3502967	SC5A8_XENTRSodium-coupled monocarboxylate transporter 1 OS=Xenopus tropicalis OX=8364 GN=slc5a8 PE=2 SV=1
OX382150.1	MSTRG.144	Osclob_v00_mik.OX382150.1G165.1	MSTRG.144.2	Osclob_v00_mik.OX382150.1G165	1637	938	1317	2063	634	4806	2893	4872	4835	1488.75	3608	MALE	3502967	SC5A8_XENTRSodium-coupled monocarboxylate transporter 1 OS=Xenopus tropicalis OX=8364 GN=slc5a8 PE=2 SV=1
OX382150.1	MSTRG.144	Osclob_v00_mik.OX382150.1G165.1	MSTRG.144.3	Osclob_v00_mik.OX382150.1G165	0	0	0	0	1	0	75	1	0	0	15.4	MALE	3502967	SC5A8_XENTRSodium-coupled monocarboxylate transporter 1 OS=Xenopus tropicalis OX=8364 GN=slc5a8 PE=2 SV=1
OX382150.1	MSTRG.159	Osclob_v00_mik.OX382150.1G211.1	MSTRG.159.1	Osclob_v00_mik.OX382150.1G211	290	0	0	241	517	218	21	704	502	132.75	392.4	MALE	#N/A	#N/A
OX382150.1	MSTRG.163	Osclob_v00_mik.OX382150.1G200.1	MSTRG.163.1	Osclob_v00_mik.OX382150.1G200	71	39	44	471	68	284	42	90	97	156.25	116.2	MALE	#N/A	#N/A
OX382150.1	MSTRG.163	Osclob_v00_mik.OX382150.1G200.2	MSTRG.163.1	Osclob_v00_mik.OX382150.1G200	71	39	44	471	68	284	42	90	97	156.25	116.2	MALE	2335554	#N/A
OX382150.1	MSTRG.206	Osclob_v00_mik.OX382150.1G240.1	MSTRG.206.1	Osclob_v00_mik.OX382150.1G240	7958	9286	5939	16212	28255	32535	12707	16713	19169	9848.75	21875.8	MALE	#N/A	#N/A
OX382150.1	MSTRG.206	Osclob_v00_mik.OX382150.1G240.1	MSTRG.206.2	Osclob_v00_mik.OX382150.1G240	8115	96	11153	0	37549	0	987	6073	19563	4841	12834.4	MALE	#N/A	#N/A
OX382150.1	MSTRG.206	Osclob_v00_mik.OX382150.1G240.1	MSTRG.206.3	Osclob_v00_mik.OX382150.1G240	10522	0	3702	0	0	0	0	33836	23019	3556	11371	MALE	#N/A	#N/A
OX382150.1	MSTRG.206	Osclob_v00_mik.OX382150.1G240.1	MSTRG.206.4	Osclob_v00_mik.OX382150.1G240	1510	315	54	0	4682	1505	1811	42	5945	469.75	2797	MALE	#N/A	#N/A
OX382150.1	MSTRG.206	Osclob_v00_mik.OX382150.1G240.2	MSTRG.206.1	Osclob_v00_mik.OX382150.1G240	7958	9286	5939	16212	28255	32535	12707	16713	19169	9848.75	21875.8	MALE	2503878	MYCB2_HUMANE3 ubiquitin-protein ligase MYCBP2 OS=Homo sapiens OX=9606 GN=MYCBP2 PE=1 SV=4
OX382150.1	MSTRG.206	Osclob_v00_mik.OX382150.1G240.2	MSTRG.206.2	Osclob_v00_mik.OX382150.1G240	8115	96	11153	0	37549	0	987	6073	19563	4841	12834.4	MALE	2503878	MYCB2_HUMANE3 ubiquitin-protein ligase MYCBP2 OS=Homo sapiens OX=9606 GN=MYCBP2 PE=1 SV=4
OX382150.1	MSTRG.206	Osclob_v00_mik.OX382150.1G240.2	MSTRG.206.3	Osclob_v00_mik.OX382150.1G240	10522	0	3702	0	0	0	0	33836	23019	3556	11371	MALE	2503878	MYCB2_HUMANE3 ubiquitin-protein ligase MYCBP2 OS=Homo sapiens OX=9606 GN=MYCBP2 PE=1 SV=4
OX382150.1	MSTRG.206	Osclob_v00_mik.OX382150.1G240.2	MSTRG.206.4	Osclob_v00_mik.OX382150.1G240	1510	315	54	0	4682	1505	1811	42	5945	469.75	2797	MALE	2503878	MYCB2_HUMANE3 ubiquitin-protein ligase MYCBP2 OS=Homo sapiens OX=9606 GN=MYCBP2 PE=1 SV=4
OX382150.1	MSTRG.210	Osclob_v00_mik.OX382150.1G306.1	MSTRG.210.1	Osclob_v00_mik.OX382150.1G306	2153	978	1167	70	757	81	420	6449	2470	1092	2035.4	MALE	#N/A	#N/A
OX382150.1	MSTRG.210	Osclob_v00_mik.OX382150.1G306.1	MSTRG.210.2	Osclob_v00_mik.OX382150.1G306	331	423	5010	500	1030	1393	204	2385	4563	1566	1915	MALE	#N/A	#N/A
OX382150.1	MSTRG.210	Osclob_v00_mik.OX382150.1G306.1	MSTRG.210.4	Osclob_v00_mik.OX382150.1G306	146	36	0	1326	3868	38	0	101	398	377	881	MALE	#N/A	#N/A
OX382150.1	MSTRG.210	Osclob_v00_mik.OX382150.1G306.1	MSTRG.210.5	Osclob_v00_mik.OX382150.1G306	18	0	0	3	2	4062	0	2	11	5.25	815.4	MALE	#N/A	#N/A
OX382150.1	MSTRG.210	Osclob_v00_mik.OX382150.1G306.1	MSTRG.210.6	Osclob_v00_mik.OX382150.1G306	76	141	1203	332	1229	317	189	29	2949	438	942.6	MALE	#N/A	#N/A
OX382150.1	MSTRG.210	Osclob_v00_mik.OX382150.1G306.1	MSTRG.210.7	Osclob_v00_mik.OX382150.1G306	900	1	0	2396	2720	1890	0	3549	0	824.25	1631.8	MALE	#N/A	#N/A
OX382150.1	MSTRG.210	Osclob_v00_mik.OX382150.1G306.1	MSTRG.210.8	Osclob_v00_mik.OX382150.1G306	961	0	0	1352	0	0	0	21	0	578.25	4.2	MALE	#N/A	#N/A
OX382150.1	MSTRG.210	Osclob_v00_mik.OX382150.1G306.1	MSTRG.210.9	Osclob_v00_mik.OX382150.1G306	957	524	0	123	0	0	0	0	511	401	102.2	MALE	#N/A	#N/A
OX382150.1	MSTRG.210	Osclob_v00_mik.OX382150.1G306.1	MSTRG.210.10	Osclob_v00_mik.OX382150.1G306	0	0	0	0	0	0	0	0	181	0	36.2	MALE	#N/A	#N/A
OX382150.1	MSTRG.210	Osclob_v00_mik.OX382150.1G306.1	MSTRG.210.11	Osclob_v00_mik.OX382150.1G306	72	0	0	0	0	0	0	0	650	18	130	MALE	#N/A	#N/A
OX382150.1	MSTRG.210	Osclob_v00_mik.OX382150.1G306.1	MSTRG.210.16	Osclob_v00_mik.OX382150.1G306	1709	1428	3750	1802	3032	2241	1987	3522	5376	2172.25	3231.6	MALE	#N/A	#N/A
OX382150.1	MSTRG.210	Osclob_v00_mik.OX382150.1G309.1	MSTRG.210.1	Osclob_v00_mik.OX382150.1G309	2153	978	1167	70	757	81	420	6449	2470	1092	2035.4	MALE	#N/A	#N/A
OX382150.1	MSTRG.210	Osclob_v00_mik.OX382150.1G309.1	MSTRG.210.2	Osclob_v00_mik.OX382150.1G309	331	423	5010	500	1030	1393	204	2385	4563	1566	1915	MALE	#N/A	#N/A
OX382150.1	MSTRG.210	Osclob_v00_mik.OX382150.1G309.1	MSTRG.210.4	Osclob_v00_mik.OX382150.1G309	146	36	0	1326	3868	38	0	101	398	377	881	MALE	#N/A	#N/A
OX382150.1	MSTRG.210	Osclob_v00_mik.OX382150.1G309.1	MSTRG.210.5	Osclob_v00_mik.OX382150.1G309	18	0	0	3	2	4062	0	2	11	5.25	815.4	MALE	#N/A	#N/A
OX382150.1	MSTRG.210	Osclob_v00_mik.OX382150.1G309.1	MSTRG.210.6	Osclob_v00_mik.OX382150.1G309	76	141	1203	332	1229	317	189	29	2949	438	942.6	MALE	#N/A	#N/A
OX382150.1	MSTRG.210	Osclob_v00_mik.OX382150.1G309.1	MSTRG.210.7	Osclob_v00_mik.OX382150.1G309	900	1	0	2396	2720	1890	0	3549	0	824.25	1631.8	MALE	#N/A	#N/A
OX382150.1	MSTRG.210	Osclob_v00_mik.OX382150.1G309.1	MSTRG.210.8	Osclob_v00_mik.OX382150.1G309	961	0	0	1352	0	0	0	21	0	578.25	4.2	MALE	#N/A	#N/A
OX382150.1	MSTRG.210	Osclob_v00_mik.OX382150.1G309.1	MSTRG.210.9	Osclob_v00_mik.OX382150.1G309	957	524	0	123	0	0	0	0	511	401	102.2	MALE	#N/A	#N/A
OX382150.1	MSTRG.210	Osclob_v00_mik.OX382150.1G309.1	MSTRG.210.10	Osclob_v00_mik.OX382150.1G309	0	0	0	0	0	0	0	0	181	0	36.2	MALE	#N/A	#N/A
OX382150.1	MSTRG.210	Osclob_v00_mik.OX382150.1G309.1	MSTRG.210.11	Osclob_v00_mik.OX382150.1G309	72	0	0	0	0	0	0	0	650	18	130	MALE	#N/A	#N/A
OX382150.1	MSTRG.218	Osclob_v00_mik.OX382150.1G312.1	MSTRG.218.1	Osclob_v00_mik.OX382150.1G312	0	0	11	240	151	0	5	225	1782	62.75	432.6	MALE	#N/A	#N/A
OX382150.1	MSTRG.244	Osclob_v00_mik.OX382150.1G254.1	MSTRG.244.1	Osclob_v00_mik.OX382150.1G254	1097	849	718	630	5700	2786	2172	3914	878	823.5	3090	MALE	2609266	-
OX382150.1	MSTRG.244	Osclob_v00_mik.OX382150.1G254.1	MSTRG.244.2	Osclob_v00_mik.OX382150.1G254	0	0	0	0	0	0	0	520	1057	0	315.4	MALE	2609266	-
OX382150.1	MSTRG.244	Osclob_v00_mik.OX382150.1G254.1	MSTRG.244.5	Osclob_v00_mik.OX382150.1G254	5	2	0	0	37	0	18	15	0	1.75	14	MALE	2609266	-
OX382150.1	MSTRG.244	Osclob_v00_mik.OX382150.1G254.1	MSTRG.244.7	Osclob_v00_mik.OX382150.1G254	0	0	0	150	4444	139	3	5771	2	37.5	2071.8	MALE	2609266	-
OX382150.1	MSTRG.244	Osclob_v00_mik.OX382150.1G261.1	MSTRG.244.1	Osclob_v00_mik.OX382150.1G261	1097	849	718	630	5700	2786	2172	3914	878	823.5	3090	MALE	2417384	-
OX382150.1	MSTRG.244	Osclob_v00_mik.OX382150.1G261.1	MSTRG.244.2	Osclob_v00_mik.OX382150.1G261	0	0	0	0	0	0	0	520	1057	0	315.4	MALE	2417384	-
OX382150.1	MSTRG.244	Osclob_v00_mik.OX382150.1G261.1	MSTRG.244.5	Osclob_v00_mik.OX382150.1G261	5	2	0	0	37	0	18	15	0	1.75	14	MALE	2417384	-
OX382150.1	MSTRG.260	Osclob_v00_mik.OX382150.1G275.2	MSTRG.260.2	Osclob_v00_mik.OX382150.1G275	40	0	0	0	0	0	0	0	0	10	0	MALE	#N/A	#N/A
OX382150.1	MSTRG.260	Osclob_v00_mik.OX382150.1G275.2	MSTRG.260.3	Osclob_v00_mik.OX382150.1G275	123	0	20	0	3703	3	0	151	10	35.75	773.4	MALE	#N/A	#N/A
OX382150.1	MSTRG.260	Osclob_v00_mik.OX382150.1G275.2	MSTRG.260.4	Osclob_v00_mik.OX382150.1G275	0	4	48	0	951	74	1742	6154	202	13	1824.6	MALE	#N/A	#N/A
OX382150.1	MSTRG.260	Osclob_v00_mik.OX382150.1G275.2	MSTRG.260.7	Osclob_v00_mik.OX382150.1G275	0	0	3803	0	8333	502	2504	25009	8883	950.75	9046.2	MALE	#N/A	#N/A
OX382150.1	MSTRG.260	Osclob_v00_mik.OX382150.1G275.2	MSTRG.260.8	Osclob_v00_mik.OX382150.1G275	2387	0	0	25	0	86	0	328	183	603	119.4	MALE	#N/A	#N/A
OX382150.1	MSTRG.260	Osclob_v00_mik.OX382150.1G275.2	MSTRG.260.9	Osclob_v00_mik.OX382150.1G275	0	0	672	0	1730	10595	0	0	6750	168	3815	MALE	#N/A	#N/A
OX382150.1	MSTRG.260	Osclob_v00_mik.OX382150.1G275.2	MSTRG.260.10	Osclob_v00_mik.OX382150.1G275	0	0	9874	1979	10453	0	0	3558	9835	2963.25	4769.2	MALE	#N/A	#N/A
OX382150.1	MSTRG.344	Osclob_v00_mik.OX382150.1G619.1	MSTRG.344.1	Osclob_v00_mik.OX382150.1G619	264	0	186	0	0	303	191	0	1189	112.5	336.6	MALE	#N/A	#N/A
OX382150.1	MSTRG.395	Osclob_v00_mik.OX382150.1G609.1	MSTRG.395.1	Osclob_v00_mik.OX382150.1G609	967	662	845	1377	3383	1984	1222	1999	1973	962.75	2112.2	MALE	#N/A	#N/A
OX382150.1	MSTRG.395	Osclob_v00_mik.OX382150.1G609.1	MSTRG.395.3	Osclob_v00_mik.OX382150.1G609	0	0	0	0	156	259	0	0	0	0	83	MALE	#N/A	#N/A
OX382150.1	MSTRG.457	Osclob_v00_mik.OX382150.1G393.1	MSTRG.457.1	Osclob_v00_mik.OX382150.1G393	12861	3363	10466	10028	30042	27619	3634	14963	25398	9179.5	20331.2	MALE	1949578	FAT3_RATProtocadherin Fat 3 OS=Rattus norvegicus OX=10116 GN=Fat3 PE=1 SV=1
OX382150.1	MSTRG.553	Osclob_v00_mik.OX382150.1G496.1	MSTRG.553.1	Osclob_v00_mik.OX382150.1G496	98	118	110	59	465	311	387	635	904	96.25	540.4	MALE	2483425	MGT4A_CHICKAlpha-1,3-mannosyl-glycoprotein 4-beta-N-acetylglucosaminyltransferase A OS=Gallus gallus OX=9031 GN=MGAT4A PE=2 SV=1
OX382150.1	MSTRG.553	Osclob_v00_mik.OX382150.1G496.1	MSTRG.553.3	Osclob_v00_mik.OX382150.1G496	2902	1729	2571	3771	5613	6106	1979	6175	4285	2743.25	4831.6	MALE	2483425	MGT4A_CHICKAlpha-1,3-mannosyl-glycoprotein 4-beta-N-acetylglucosaminyltransferase A OS=Gallus gallus OX=9031 GN=MGAT4A PE=2 SV=1
OX382150.1	MSTRG.553	Osclob_v00_mik.OX382150.1G496.1	MSTRG.553.4	Osclob_v00_mik.OX382150.1G496	548	1052	1800	0	1596	1071	1876	322	2918	850	1556.6	MALE	2483425	MGT4A_CHICKAlpha-1,3-mannosyl-glycoprotein 4-beta-N-acetylglucosaminyltransferase A OS=Gallus gallus OX=9031 GN=MGAT4A PE=2 SV=1
OX382150.1	MSTRG.555	Osclob_v00_mik.OX382150.1G494.2	MSTRG.555.1	Osclob_v00_mik.OX382150.1G494	2862	1065	2354	3381	23	0	0	5482	2037	2415.5	1508.4	MALE	#N/A	#N/A
OX382150.1	MSTRG.555	Osclob_v00_mik.OX382150.1G494.2	MSTRG.555.4	Osclob_v00_mik.OX382150.1G494	1765	956	265	0	7415	370	1405	931	2162	746.5	2456.6	MALE	#N/A	#N/A
OX382150.1	MSTRG.555	Osclob_v00_mik.OX382150.1G494.2	MSTRG.555.5	Osclob_v00_mik.OX382150.1G494	0	0	0	182	0	0	0	61	0	45.5	12.2	MALE	#N/A	#N/A
OX382150.1	MSTRG.555	Osclob_v00_mik.OX382150.1G494.1	MSTRG.555.1	Osclob_v00_mik.OX382150.1G494	2862	1065	2354	3381	23	0	0	5482	2037	2415.5	1508.4	MALE	2438310	-
OX382150.1	MSTRG.555	Osclob_v00_mik.OX382150.1G494.1	MSTRG.555.4	Osclob_v00_mik.OX382150.1G494	1765	956	265	0	7415	370	1405	931	2162	746.5	2456.6	MALE	2438310	-
OX382150.1	MSTRG.555	Osclob_v00_mik.OX382150.1G494.1	MSTRG.555.5	Osclob_v00_mik.OX382150.1G494	0	0	0	182	0	0	0	61	0	45.5	12.2	MALE	2438310	-
OX382150.1	MSTRG.556	Osclob_v00_mik.OX382150.1G497.1	MSTRG.556.2	Osclob_v00_mik.OX382150.1G497	1698	654	1106	476	2325	210	304	1735	3215	983.5	1557.8	MALE	2094619	ATRX_HUMANTranscriptional regulator ATRX OS=Homo sapiens OX=9606 GN=ATRX PE=1 SV=6
OX382150.1	MSTRG.565	Osclob_v00_mik.OX382150.1G508.1	MSTRG.565.1	Osclob_v00_mik.OX382150.1G508	29	0	0	0	206	0	0	0	0	7.25	41.2	MALE	#N/A	#N/A
OX382150.1	MSTRG.565	Osclob_v00_mik.OX382150.1G508.1	MSTRG.565.2	Osclob_v00_mik.OX382150.1G508	0	0	0	0	65	2	0	50	0	0	23.4	MALE	#N/A	#N/A
OX382150.1	MSTRG.591	Osclob_v00_mik.OX382150.1G803.1	MSTRG.591.1	Osclob_v00_mik.OX382150.1G803	127	356	39	66	133	53	73	208	42	147	101.8	MALE	#N/A	#N/A
OX382150.1	MSTRG.591	Osclob_v00_mik.OX382150.1G803.1	MSTRG.591.3	Osclob_v00_mik.OX382150.1G803	1	0	5	12	0	0	41	0	6	4.5	9.4	MALE	#N/A	#N/A
OX382150.1	MSTRG.591	Osclob_v00_mik.OX382150.1G812.1	MSTRG.591.1	Osclob_v00_mik.OX382150.1G812	127	356	39	66	133	53	73	208	42	147	101.8	MALE	#N/A	#N/A
OX382150.1	MSTRG.679	Osclob_v00_mik.OX382150.1G702.1	MSTRG.679.1	Osclob_v00_mik.OX382150.1G702	817	705	452	522	2430	395	1197	2275	1618	624	1583	MALE	2440652	KPEL_DROMESerine/threonine-protein kinase pelle OS=Drosophila melanogaster OX=7227 GN=pll PE=1 SV=1
OX382150.1	MSTRG.695	Osclob_v00_mik.OX382150.1G722.1	MSTRG.695.1	Osclob_v00_mik.OX382150.1G722	834	164	6472	1019	5328	2012	3694	87	3004	2122.25	2825	MALE	2630215	SC5A8_HUMANSodium-coupled monocarboxylate transporter 1 OS=Homo sapiens OX=9606 GN=SLC5A8 PE=1 SV=2
OX382150.1	MSTRG.695	Osclob_v00_mik.OX382150.1G722.1	MSTRG.695.2	Osclob_v00_mik.OX382150.1G722	65	552	0	0	4765	0	1068	12370	213	154.25	3683.2	MALE	2630215	SC5A8_HUMANSodium-coupled monocarboxylate transporter 1 OS=Homo sapiens OX=9606 GN=SLC5A8 PE=1 SV=2
OX382150.1	MSTRG.695	Osclob_v00_mik.OX382150.1G722.1	MSTRG.695.3	Osclob_v00_mik.OX382150.1G722	0	31	0	0	297	0	0	0	0	7.75	59.4	MALE	2630215	SC5A8_HUMANSodium-coupled monocarboxylate transporter 1 OS=Homo sapiens OX=9606 GN=SLC5A8 PE=1 SV=2
OX382150.1	MSTRG.730	Osclob_v00_mik.OX382150.1G837.1	MSTRG.730.2	Osclob_v00_mik.OX382150.1G837	593	1378	2030	971	5214	2232	6027	4048	6208	1243	4745.8	MALE	2637256	VATA_ANOGAV-type proton ATPase catalytic subunit A OS=Anopheles gambiae OX=7165 GN=Vha68-2 PE=3 SV=1
OX382150.1	MSTRG.730	Osclob_v00_mik.OX382150.1G837.1	MSTRG.730.3	Osclob_v00_mik.OX382150.1G837	3797	2461	6035	4903	10775	3026	3212	16207	3339	4299	7311.8	MALE	2637256	VATA_ANOGAV-type proton ATPase catalytic subunit A OS=Anopheles gambiae OX=7165 GN=Vha68-2 PE=3 SV=1
OX382150.1	MSTRG.730	Osclob_v00_mik.OX382150.1G837.1	MSTRG.730.5	Osclob_v00_mik.OX382150.1G837	0	1	0	0	0	106	0	0	0	0.25	21.2	MALE	2637256	VATA_ANOGAV-type proton ATPase catalytic subunit A OS=Anopheles gambiae OX=7165 GN=Vha68-2 PE=3 SV=1
OX382150.1	MSTRG.738	Osclob_v00_mik.OX382150.1G849.1	MSTRG.738.1	Osclob_v00_mik.OX382150.1G849	756	104	709	1355	510	46	0	880	1313	731	549.8	MALE	#N/A	#N/A
OX382150.1	MSTRG.738	Osclob_v00_mik.OX382150.1G849.1	MSTRG.738.5	Osclob_v00_mik.OX382150.1G849	140	13	218	119	322	120	463	250	0	122.5	231	MALE	#N/A	#N/A
OX382150.1	MSTRG.738	Osclob_v00_mik.OX382150.1G849.1	MSTRG.738.6	Osclob_v00_mik.OX382150.1G849	20	0	48	0	0	0	0	165	0	17	33	MALE	#N/A	#N/A
OX382150.1	MSTRG.807	Osclob_v00_mik.OX382150.1G910.1	MSTRG.807.1	Osclob_v00_mik.OX382150.1G910	897	323	208	1350	561	585	0	289	2278	694.5	742.6	MALE	#N/A	#N/A
OX382150.1	MSTRG.807	Osclob_v00_mik.OX382150.1G910.1	MSTRG.807.2	Osclob_v00_mik.OX382150.1G910	0	0	1983	0	0	0	38	0	1666	495.75	340.8	MALE	#N/A	#N/A
OX382150.1	MSTRG.841	Osclob_v00_mik.OX382150.1G954.2	MSTRG.841.2	Osclob_v00_mik.OX382150.1G954	38	32	2	47	20	7	17	16	17	29.75	15.4	MALE	#N/A	#N/A
OX382150.1	MSTRG.842	Osclob_v00_mik.OX382150.1G956.1	MSTRG.842.1	Osclob_v00_mik.OX382150.1G956	0	0	0	0	122	0	457	255	142	0	195.2	MALE	#N/A	#N/A
OX382150.1	MSTRG.842	Osclob_v00_mik.OX382150.1G956.1	MSTRG.842.2	Osclob_v00_mik.OX382150.1G956	31	35	0	0	294	2	9	41	1	16.5	69.4	MALE	#N/A	#N/A
OX382150.1	MSTRG.842	Osclob_v00_mik.OX382150.1G956.1	MSTRG.842.4	Osclob_v00_mik.OX382150.1G956	674	284	926	421	2009	1029	637	2202	1627	576.25	1500.8	MALE	#N/A	#N/A
OX382150.1	MSTRG.842	Osclob_v00_mik.OX382150.1G956.1	MSTRG.842.7	Osclob_v00_mik.OX382150.1G956	0	12	1	3	0	1	46	0	4	4	10.2	MALE	#N/A	#N/A
OX382150.1	MSTRG.850	Osclob_v00_mik.OX382150.1G990.1	MSTRG.850.1	Osclob_v00_mik.OX382150.1G990	16	24	50	221	1081	170	3	1082	407	77.75	548.6	MALE	2147581	-
OX382150.1	MSTRG.895	Osclob_v00_mik.OX382150.1G993.1	MSTRG.895.1	Osclob_v00_mik.OX382150.1G993	65	152	85	230	208	10	134	261	147	133	152	MALE	#N/A	#N/A
OX382150.1	MSTRG.895	Osclob_v00_mik.OX382150.1G993.1	MSTRG.895.2	Osclob_v00_mik.OX382150.1G993	27	22	55	17	42	135	83	39	212	30.25	102.2	MALE	#N/A	#N/A
OX382150.1	MSTRG.895	Osclob_v00_mik.OX382150.1G993.1	MSTRG.895.3	Osclob_v00_mik.OX382150.1G993	0	0	8	0	48	10	142	19	0	2	43.8	MALE	#N/A	#N/A
OX382150.1	MSTRG.895	Osclob_v00_mik.OX382150.1G993.1	MSTRG.895.4	Osclob_v00_mik.OX382150.1G993	4	0	1	0	126	35	312	13	24	1.25	102	MALE	#N/A	#N/A
OX382150.1	MSTRG.895	Osclob_v00_mik.OX382150.1G993.1	MSTRG.895.5	Osclob_v00_mik.OX382150.1G993	6	0	9	0	152	207	117	139	342	3.75	191.4	MALE	#N/A	#N/A
OX382150.1	MSTRG.895	Osclob_v00_mik.OX382150.1G993.1	MSTRG.895.6	Osclob_v00_mik.OX382150.1G993	0	0	0	0	0	165	69	0	3	0	47.4	MALE	#N/A	#N/A
OX382150.1	MSTRG.895	Osclob_v00_mik.OX382150.1G993.1	MSTRG.895.8	Osclob_v00_mik.OX382150.1G993	0	0	0	0	516	0	77	575	899	0	413.4	MALE	#N/A	#N/A
OX382150.1	MSTRG.895	Osclob_v00_mik.OX382150.1G996.1	MSTRG.895.1	Osclob_v00_mik.OX382150.1G996	65	152	85	230	208	10	134	261	147	133	152	MALE	2410031	PRS6B_HUMAN26S proteasome regulatory subunit 6B OS=Homo sapiens OX=9606 GN=PSMC4 PE=1 SV=2
OX382150.1	MSTRG.895	Osclob_v00_mik.OX382150.1G996.1	MSTRG.895.2	Osclob_v00_mik.OX382150.1G996	27	22	55	17	42	135	83	39	212	30.25	102.2	MALE	2410031	PRS6B_HUMAN26S proteasome regulatory subunit 6B OS=Homo sapiens OX=9606 GN=PSMC4 PE=1 SV=2
OX382150.1	MSTRG.895	Osclob_v00_mik.OX382150.1G996.1	MSTRG.895.3	Osclob_v00_mik.OX382150.1G996	0	0	8	0	48	10	142	19	0	2	43.8	MALE	2410031	PRS6B_HUMAN26S proteasome regulatory subunit 6B OS=Homo sapiens OX=9606 GN=PSMC4 PE=1 SV=2
OX382150.1	MSTRG.895	Osclob_v00_mik.OX382150.1G996.1	MSTRG.895.4	Osclob_v00_mik.OX382150.1G996	4	0	1	0	126	35	312	13	24	1.25	102	MALE	2410031	PRS6B_HUMAN26S proteasome regulatory subunit 6B OS=Homo sapiens OX=9606 GN=PSMC4 PE=1 SV=2
OX382150.1	MSTRG.895	Osclob_v00_mik.OX382150.1G996.1	MSTRG.895.5	Osclob_v00_mik.OX382150.1G996	6	0	9	0	152	207	117	139	342	3.75	191.4	MALE	2410031	PRS6B_HUMAN26S proteasome regulatory subunit 6B OS=Homo sapiens OX=9606 GN=PSMC4 PE=1 SV=2
OX382150.1	MSTRG.895	Osclob_v00_mik.OX382150.1G996.1	MSTRG.895.6	Osclob_v00_mik.OX382150.1G996	0	0	0	0	0	165	69	0	3	0	47.4	MALE	2410031	PRS6B_HUMAN26S proteasome regulatory subunit 6B OS=Homo sapiens OX=9606 GN=PSMC4 PE=1 SV=2
OX382150.1	MSTRG.895	Osclob_v00_mik.OX382150.1G996.1	MSTRG.895.8	Osclob_v00_mik.OX382150.1G996	0	0	0	0	516	0	77	575	899	0	413.4	MALE	2410031	PRS6B_HUMAN26S proteasome regulatory subunit 6B OS=Homo sapiens OX=9606 GN=PSMC4 PE=1 SV=2
OX382150.1	MSTRG.895	Osclob_v00_mik.OX382150.1G996.1	MSTRG.895.9	Osclob_v00_mik.OX382150.1G996	0	0	0	22	0	760	204	292	91	5.5	269.4	MALE	2410031	PRS6B_HUMAN26S proteasome regulatory subunit 6B OS=Homo sapiens OX=9606 GN=PSMC4 PE=1 SV=2
OX382150.1	MSTRG.895	Osclob_v00_mik.OX382150.1G1009.2	MSTRG.895.1	Osclob_v00_mik.OX382150.1G1009	65	152	85	230	208	10	134	261	147	133	152	MALE	#N/A	#N/A
OX382150.1	MSTRG.895	Osclob_v00_mik.OX382150.1G1009.2	MSTRG.895.2	Osclob_v00_mik.OX382150.1G1009	27	22	55	17	42	135	83	39	212	30.25	102.2	MALE	#N/A	#N/A
OX382150.1	MSTRG.895	Osclob_v00_mik.OX382150.1G1009.2	MSTRG.895.3	Osclob_v00_mik.OX382150.1G1009	0	0	8	0	48	10	142	19	0	2	43.8	MALE	#N/A	#N/A
OX382150.1	MSTRG.895	Osclob_v00_mik.OX382150.1G1009.2	MSTRG.895.4	Osclob_v00_mik.OX382150.1G1009	4	0	1	0	126	35	312	13	24	1.25	102	MALE	#N/A	#N/A
OX382150.1	MSTRG.935	Osclob_v00_mik.OX382150.1G1020.1	MSTRG.935.1	Osclob_v00_mik.OX382150.1G1020	40	23	21	51	213	53	71	130	54	33.75	104.2	MALE	#N/A	#N/A
OX382150.1	MSTRG.1054	Osclob_v00_mik.OX382150.1G1128.1	MSTRG.1054.1	Osclob_v00_mik.OX382150.1G1128	11	12	10	20	13	62	0	15	181	13.25	54.2	MALE	2163792	ITA7_RATIntegrin alpha-7 OS=Rattus norvegicus OX=10116 GN=Itga7 PE=1 SV=2
OX382150.1	MSTRG.1054	Osclob_v00_mik.OX382150.1G1128.1	MSTRG.1054.2	Osclob_v00_mik.OX382150.1G1128	13	2	73	32	109	62	95	191	158	30	123	MALE	2163792	ITA7_RATIntegrin alpha-7 OS=Rattus norvegicus OX=10116 GN=Itga7 PE=1 SV=2
OX382150.1	MSTRG.1054	Osclob_v00_mik.OX382150.1G1128.1	MSTRG.1054.3	Osclob_v00_mik.OX382150.1G1128	2	28	0	2	17	3	10	26	17	8	14.6	MALE	2163792	ITA7_RATIntegrin alpha-7 OS=Rattus norvegicus OX=10116 GN=Itga7 PE=1 SV=2
OX382150.1	MSTRG.1054	Osclob_v00_mik.OX382150.1G1128.1	MSTRG.1054.4	Osclob_v00_mik.OX382150.1G1128	253	119	369	267	0	0	0	2860	0	252	572	MALE	2163792	ITA7_RATIntegrin alpha-7 OS=Rattus norvegicus OX=10116 GN=Itga7 PE=1 SV=2
OX382150.1	MSTRG.1054	Osclob_v00_mik.OX382150.1G1128.1	MSTRG.1054.5	Osclob_v00_mik.OX382150.1G1128	4	13	0	0	0	0	0	391	35	4.25	85.2	MALE	2163792	ITA7_RATIntegrin alpha-7 OS=Rattus norvegicus OX=10116 GN=Itga7 PE=1 SV=2
OX382150.1	MSTRG.1054	Osclob_v00_mik.OX382150.1G1128.1	MSTRG.1054.6	Osclob_v00_mik.OX382150.1G1128	49	880	29	22	674	957	883	837	297	245	729.6	MALE	2163792	ITA7_RATIntegrin alpha-7 OS=Rattus norvegicus OX=10116 GN=Itga7 PE=1 SV=2
OX382150.1	MSTRG.1054	Osclob_v00_mik.OX382150.1G1128.1	MSTRG.1054.7	Osclob_v00_mik.OX382150.1G1128	1	305	1	1	7	32	38	6	2247	77	466	MALE	2163792	ITA7_RATIntegrin alpha-7 OS=Rattus norvegicus OX=10116 GN=Itga7 PE=1 SV=2
OX382150.1	MSTRG.1054	Osclob_v00_mik.OX382150.1G1128.1	MSTRG.1054.8	Osclob_v00_mik.OX382150.1G1128	274	247	229	416	484	513	522	434	1308	291.5	652.2	MALE	2163792	ITA7_RATIntegrin alpha-7 OS=Rattus norvegicus OX=10116 GN=Itga7 PE=1 SV=2
OX382150.1	MSTRG.1054	Osclob_v00_mik.OX382150.1G1128.1	MSTRG.1054.9	Osclob_v00_mik.OX382150.1G1128	5151	875	6151	4599	15340	9361	6676	9632	14857	4194	11173.2	MALE	2163792	ITA7_RATIntegrin alpha-7 OS=Rattus norvegicus OX=10116 GN=Itga7 PE=1 SV=2
OX382150.1	MSTRG.1054	Osclob_v00_mik.OX382150.1G1128.1	MSTRG.1054.10	Osclob_v00_mik.OX382150.1G1128	1	0	2	1	1595	0	0	86	0	1	336.2	MALE	2163792	ITA7_RATIntegrin alpha-7 OS=Rattus norvegicus OX=10116 GN=Itga7 PE=1 SV=2
OX382150.1	MSTRG.1054	Osclob_v00_mik.OX382150.1G1128.1	MSTRG.1054.11	Osclob_v00_mik.OX382150.1G1128	0	0	0	0	1234	0	822	1103	210	0	673.8	MALE	2163792	ITA7_RATIntegrin alpha-7 OS=Rattus norvegicus OX=10116 GN=Itga7 PE=1 SV=2
OX382150.1	MSTRG.1054	Osclob_v00_mik.OX382150.1G1128.1	MSTRG.1054.12	Osclob_v00_mik.OX382150.1G1128	0	0	492	1014	13	0	0	14	303	376.5	66	MALE	2163792	ITA7_RATIntegrin alpha-7 OS=Rattus norvegicus OX=10116 GN=Itga7 PE=1 SV=2
OX382150.1	MSTRG.1054	Osclob_v00_mik.OX382150.1G1128.1	MSTRG.1054.13	Osclob_v00_mik.OX382150.1G1128	0	0	0	0	0	1366	0	0	0	0	273.2	MALE	2163792	ITA7_RATIntegrin alpha-7 OS=Rattus norvegicus OX=10116 GN=Itga7 PE=1 SV=2
OX382150.1	MSTRG.1054	Osclob_v00_mik.OX382150.1G1128.1	MSTRG.1054.14	Osclob_v00_mik.OX382150.1G1128	0	0	0	0	0	820	0	0	3	0	164.6	MALE	2163792	ITA7_RATIntegrin alpha-7 OS=Rattus norvegicus OX=10116 GN=Itga7 PE=1 SV=2
OX382150.1	MSTRG.1054	Osclob_v00_mik.OX382150.1G1128.1	MSTRG.1054.15	Osclob_v00_mik.OX382150.1G1128	1	0	2	0	217	190	178	306	16	0.75	181.4	MALE	2163792	ITA7_RATIntegrin alpha-7 OS=Rattus norvegicus OX=10116 GN=Itga7 PE=1 SV=2
OX382150.1	MSTRG.1054	Osclob_v00_mik.OX382150.1G1128.1	MSTRG.1054.16	Osclob_v00_mik.OX382150.1G1128	2136	0	820	49	33	0	24	9	453	751.25	103.8	MALE	2163792	ITA7_RATIntegrin alpha-7 OS=Rattus norvegicus OX=10116 GN=Itga7 PE=1 SV=2
OX382150.1	MSTRG.1054	Osclob_v00_mik.OX382150.1G1128.1	MSTRG.1054.17	Osclob_v00_mik.OX382150.1G1128	256	2317	0	51	0	183	0	0	28	656	42.2	MALE	2163792	ITA7_RATIntegrin alpha-7 OS=Rattus norvegicus OX=10116 GN=Itga7 PE=1 SV=2
OX382150.1	MSTRG.1054	Osclob_v00_mik.OX382150.1G1128.1	MSTRG.1054.21	Osclob_v00_mik.OX382150.1G1128	2572	581	896	1814	1894	1114	0	2737	5902	1465.75	2329.4	MALE	2163792	ITA7_RATIntegrin alpha-7 OS=Rattus norvegicus OX=10116 GN=Itga7 PE=1 SV=2
OX382150.1	MSTRG.1144	Osclob_v00_mik.OX382150.1G1190.2	MSTRG.1144.1	Osclob_v00_mik.OX382150.1G1190	0	80	0	0	0	0	155	78	14	20	49.4	MALE	#N/A	#N/A
OX382150.1	MSTRG.1144	Osclob_v00_mik.OX382150.1G1190.2	MSTRG.1144.2	Osclob_v00_mik.OX382150.1G1190	13	149	3289	211	1165	31	827	1757	1133	915.5	982.6	MALE	#N/A	#N/A
OX382150.1	MSTRG.1144	Osclob_v00_mik.OX382150.1G1190.2	MSTRG.1144.4	Osclob_v00_mik.OX382150.1G1190	78	1296	647	215	0	278	0	9	261	559	109.6	MALE	#N/A	#N/A
OX382150.1	MSTRG.1144	Osclob_v00_mik.OX382150.1G1190.2	MSTRG.1144.5	Osclob_v00_mik.OX382150.1G1190	0	0	0	0	0	2254	0	0	0	0	450.8	MALE	#N/A	#N/A
OX382150.1	MSTRG.1144	Osclob_v00_mik.OX382150.1G1190.2	MSTRG.1144.6	Osclob_v00_mik.OX382150.1G1190	2750	0	0	0	0	0	0	0	0	687.5	0	MALE	#N/A	#N/A
OX382150.1	MSTRG.1144	Osclob_v00_mik.OX382150.1G1190.2	MSTRG.1144.7	Osclob_v00_mik.OX382150.1G1190	593	108	534	67	0	115	0	0	0	325.5	23	MALE	#N/A	#N/A
OX382150.1	MSTRG.1144	Osclob_v00_mik.OX382150.1G1190.2	MSTRG.1144.10	Osclob_v00_mik.OX382150.1G1190	82	291	533	178	267	322	271	1084	98	271	408.4	MALE	#N/A	#N/A
OX382150.1	MSTRG.1144	Osclob_v00_mik.OX382150.1G1190.2	MSTRG.1144.11	Osclob_v00_mik.OX382150.1G1190	1797	597	183	1051	34	2927	793	124	1315	907	1038.6	MALE	#N/A	#N/A
OX382150.1	MSTRG.1144	Osclob_v00_mik.OX382150.1G1190.2	MSTRG.1144.12	Osclob_v00_mik.OX382150.1G1190	303	14	0	1	14	18	0	9	10	79.5	10.2	MALE	#N/A	#N/A
OX382150.1	MSTRG.1144	Osclob_v00_mik.OX382150.1G1190.2	MSTRG.1144.14	Osclob_v00_mik.OX382150.1G1190	439	152	0	0	709	18	126	1096	8	147.75	391.4	MALE	#N/A	#N/A
OX382150.1	MSTRG.1144	Osclob_v00_mik.OX382150.1G1190.2	MSTRG.1144.15	Osclob_v00_mik.OX382150.1G1190	107	1	768	442	1566	622	1336	3806	95	329.5	1485	MALE	#N/A	#N/A
OX382150.1	MSTRG.1144	Osclob_v00_mik.OX382150.1G1190.2	MSTRG.1144.16	Osclob_v00_mik.OX382150.1G1190	0	3	241	232	97	0	0	548	0	119	129	MALE	#N/A	#N/A
OX382150.1	MSTRG.1144	Osclob_v00_mik.OX382150.1G1190.2	MSTRG.1144.17	Osclob_v00_mik.OX382150.1G1190	702	646	1217	599	2862	2107	507	1774	368	791	1523.6	MALE	#N/A	#N/A
OX382150.1	MSTRG.1144	Osclob_v00_mik.OX382150.1G1190.2	MSTRG.1144.18	Osclob_v00_mik.OX382150.1G1190	0	24	0	0	0	0	0	0	0	6	0	MALE	#N/A	#N/A
OX382150.1	MSTRG.1144	Osclob_v00_mik.OX382150.1G1190.2	MSTRG.1144.19	Osclob_v00_mik.OX382150.1G1190	0	0	466	0	0	0	0	0	0	116.5	0	MALE	#N/A	#N/A
OX382150.1	MSTRG.1144	Osclob_v00_mik.OX382150.1G1190.2	MSTRG.1144.21	Osclob_v00_mik.OX382150.1G1190	686	0	247	0	149	60	0	453	63	233.25	145	MALE	#N/A	#N/A
OX382150.1	MSTRG.1144	Osclob_v00_mik.OX382150.1G1190.2	MSTRG.1144.22	Osclob_v00_mik.OX382150.1G1190	12	175	5463	414	3985	28	4457	3542	41805	1516	10763.4	MALE	#N/A	#N/A
OX382150.1	MSTRG.1144	Osclob_v00_mik.OX382150.1G1190.2	MSTRG.1144.23	Osclob_v00_mik.OX382150.1G1190	0	72	0	0	0	0	0	0	3423	18	684.6	MALE	#N/A	#N/A
OX382150.1	MSTRG.1144	Osclob_v00_mik.OX382150.1G1190.2	MSTRG.1144.25	Osclob_v00_mik.OX382150.1G1190	68	63	46	0	0	222	0	0	27	44.25	49.8	MALE	#N/A	#N/A
OX382150.1	MSTRG.1144	Osclob_v00_mik.OX382150.1G1190.2	MSTRG.1144.27	Osclob_v00_mik.OX382150.1G1190	25	0	1234	195	5	607	0	0	158	363.5	154	MALE	#N/A	#N/A
OX382150.1	MSTRG.1164	Osclob_v00_mik.OX382150.1G1221.1	MSTRG.1164.1	Osclob_v00_mik.OX382150.1G1221	197	118	375	350	336	388	464	174	75	260	287.4	MALE	2364895	-
OX382150.1	MSTRG.1164	Osclob_v00_mik.OX382150.1G1221.1	MSTRG.1164.2	Osclob_v00_mik.OX382150.1G1221	0	0	84	0	445	0	0	607	0	21	210.4	MALE	2364895	-
OX382150.1	MSTRG.1164	Osclob_v00_mik.OX382150.1G1221.1	MSTRG.1164.3	Osclob_v00_mik.OX382150.1G1221	7	32	15	311	97	343	14	73	806	91.25	266.6	MALE	2364895	-
OX382150.1	MSTRG.1164	Osclob_v00_mik.OX382150.1G1221.1	MSTRG.1164.4	Osclob_v00_mik.OX382150.1G1221	0	0	0	0	0	0	0	0	845	0	169	MALE	2364895	-
OX382150.1	MSTRG.1164	Osclob_v00_mik.OX382150.1G1221.1	MSTRG.1164.5	Osclob_v00_mik.OX382150.1G1221	73	6	123	184	425	300	59	660	911	96.5	471	MALE	2364895	-
OX382150.1	MSTRG.1164	Osclob_v00_mik.OX382150.1G1221.1	MSTRG.1164.6	Osclob_v00_mik.OX382150.1G1221	75	749	0	0	94	23	0	81	290	206	97.6	MALE	2364895	-
OX382150.1	MSTRG.1318	Osclob_v00_mik.OX382150.1G1479.1	MSTRG.1318.1	Osclob_v00_mik.OX382150.1G1479	275	64	124	208	31	45	333	0	858	167.75	253.4	MALE	2424720	-
OX382150.1	MSTRG.1341	Osclob_v00_mik.OX382150.1G1476.1	MSTRG.1341.1	Osclob_v00_mik.OX382150.1G1476	2248	3545	9978	4263	16763	872	5838	3352	2683	5008.5	5901.6	MALE	2508443	FBX11_RATF-box only protein 11 OS=Rattus norvegicus OX=10116 GN=Fbxo11 PE=2 SV=1
OX382150.1	MSTRG.1341	Osclob_v00_mik.OX382150.1G1476.1	MSTRG.1341.3	Osclob_v00_mik.OX382150.1G1476	359	839	2	603	0	0	20	0	488	450.75	101.6	MALE	2508443	FBX11_RATF-box only protein 11 OS=Rattus norvegicus OX=10116 GN=Fbxo11 PE=2 SV=1
OX382150.1	MSTRG.1341	Osclob_v00_mik.OX382150.1G1476.1	MSTRG.1341.4	Osclob_v00_mik.OX382150.1G1476	148	107	0	106	0	75	0	0	5	90.25	16	MALE	2508443	FBX11_RATF-box only protein 11 OS=Rattus norvegicus OX=10116 GN=Fbxo11 PE=2 SV=1
OX382150.1	MSTRG.1341	Osclob_v00_mik.OX382150.1G1476.1	MSTRG.1341.5	Osclob_v00_mik.OX382150.1G1476	3586	0	147	0	2513	0	859	10786	0	933.25	2831.6	MALE	2508443	FBX11_RATF-box only protein 11 OS=Rattus norvegicus OX=10116 GN=Fbxo11 PE=2 SV=1
OX382150.1	MSTRG.1341	Osclob_v00_mik.OX382150.1G1476.1	MSTRG.1341.6	Osclob_v00_mik.OX382150.1G1476	679	1339	2	2400	3	159	5	3	5	1105	35	MALE	2508443	FBX11_RATF-box only protein 11 OS=Rattus norvegicus OX=10116 GN=Fbxo11 PE=2 SV=1
OX382150.1	MSTRG.1341	Osclob_v00_mik.OX382150.1G1476.1	MSTRG.1341.8	Osclob_v00_mik.OX382150.1G1476	12	604	0	1	0	0	0	1	194	154.25	39	MALE	2508443	FBX11_RATF-box only protein 11 OS=Rattus norvegicus OX=10116 GN=Fbxo11 PE=2 SV=1
OX382150.1	MSTRG.1344	Osclob_v00_mik.OX382150.1G1477.1	MSTRG.1344.1	Osclob_v00_mik.OX382150.1G1477	20085	9374	20116	17542	43501	49780	7221	36533	40250	16779.2	35457	MALE	#N/A	#N/A
OX382150.1	MSTRG.1344	Osclob_v00_mik.OX382150.1G1477.1	MSTRG.1344.2	Osclob_v00_mik.OX382150.1G1477	1305	2754	707	763	3119	1941	110	1076	8178	1382.25	2884.8	MALE	#N/A	#N/A
OX382150.1	MSTRG.1344	Osclob_v00_mik.OX382150.1G1477.1	MSTRG.1344.3	Osclob_v00_mik.OX382150.1G1477	383	0	155	206	602	232	36	129	10304	186	2260.6	MALE	#N/A	#N/A
OX382150.1	MSTRG.1395	Osclob_v00_mik.OX382150.1G1609.1	MSTRG.1395.1	Osclob_v00_mik.OX382150.1G1609	38	0	0	46	2	474	0	7	31	21	102.8	MALE	#N/A	#N/A
OX382150.1	MSTRG.1395	Osclob_v00_mik.OX382150.1G1609.1	MSTRG.1395.2	Osclob_v00_mik.OX382150.1G1609	0	0	14	1	0	140	0	0	12	3.75	30.4	MALE	#N/A	#N/A
OX382150.1	MSTRG.1398	Osclob_v00_mik.OX382150.1G1614.1	MSTRG.1398.1	Osclob_v00_mik.OX382150.1G1614	7323	898	23293	34208	2318	32058	590	1060	1717	16430.5	7548.6	MALE	2444664	MATN2_MOUSEMatrilin-2 OS=Mus musculus OX=10090 GN=Matn2 PE=2 SV=2
OX382150.1	MSTRG.1401	Osclob_v00_mik.OX382150.1G1615.1	MSTRG.1401.1	Osclob_v00_mik.OX382150.1G1615	145	175	312	39	160	79	96	226	819	167.75	276	MALE	#N/A	#N/A
OX382150.1	MSTRG.1546	Osclob_v00_mik.OX382150.1G1676.1	MSTRG.1546.1	Osclob_v00_mik.OX382150.1G1676	11	7	156	129	546	847	20	47	882	75.75	468.4	MALE	#N/A	#N/A
OX382150.1	MSTRG.1546	Osclob_v00_mik.OX382150.1G1676.1	MSTRG.1546.2	Osclob_v00_mik.OX382150.1G1676	23	35	72	278	0	21	0	0	380	102	80.2	MALE	#N/A	#N/A
OX382150.1	MSTRG.1546	Osclob_v00_mik.OX382150.1G1676.1	MSTRG.1546.4	Osclob_v00_mik.OX382150.1G1676	8	0	19	0	0	4	305	0	0	6.75	61.8	MALE	#N/A	#N/A
OX382150.1	MSTRG.1546	Osclob_v00_mik.OX382150.1G1676.1	MSTRG.1546.6	Osclob_v00_mik.OX382150.1G1676	0	0	0	0	593	0	0	768	0	0	272.2	MALE	#N/A	#N/A
OX382150.1	MSTRG.1546	Osclob_v00_mik.OX382150.1G1676.1	MSTRG.1546.7	Osclob_v00_mik.OX382150.1G1676	0	0	0	0	0	0	663	32	117	0	162.4	MALE	#N/A	#N/A
OX382150.1	MSTRG.1552	Osclob_v00_mik.OX382150.1G1678.1	MSTRG.1552.1	Osclob_v00_mik.OX382150.1G1678	0	345	228	73	927	474	1141	915	97	161.5	710.8	MALE	1590132	RIPK2_MOUSEReceptor-interacting serine/threonine-protein kinase 2 OS=Mus musculus OX=10090 GN=Ripk2 PE=1 SV=1
OX382150.1	MSTRG.1552	Osclob_v00_mik.OX382150.1G1678.1	MSTRG.1552.3	Osclob_v00_mik.OX382150.1G1678	0	0	0	0	94	0	39	0	564	0	139.4	MALE	1590132	RIPK2_MOUSEReceptor-interacting serine/threonine-protein kinase 2 OS=Mus musculus OX=10090 GN=Ripk2 PE=1 SV=1
OX382150.1	MSTRG.1596	Osclob_v00_mik.OX382150.1G1727.1	MSTRG.1596.1	Osclob_v00_mik.OX382150.1G1727	297	0	299	710	864	652	18	669	9	326.5	442.4	MALE	868658	-
OX382150.1	MSTRG.1596	Osclob_v00_mik.OX382150.1G1727.1	MSTRG.1596.2	Osclob_v00_mik.OX382150.1G1727	68	282	122	0	65	26	1463	0	135	118	337.8	MALE	868658	-
OX382150.1	MSTRG.1596	Osclob_v00_mik.OX382150.1G1727.1	MSTRG.1596.3	Osclob_v00_mik.OX382150.1G1727	69	238	397	13	39	0	11	66	231	179.25	69.4	MALE	868658	-
OX382150.1	MSTRG.1596	Osclob_v00_mik.OX382150.1G1727.1	MSTRG.1596.4	Osclob_v00_mik.OX382150.1G1727	0	0	0	0	0	0	0	172	0	0	34.4	MALE	868658	-
OX382150.1	MSTRG.1697	Osclob_v00_mik.OX382150.1G1900.1	MSTRG.1697.1	Osclob_v00_mik.OX382150.1G1900	313	405	346	545	421	328	237	451	454	402.25	378.2	MALE	#N/A	#N/A
OX382150.1	MSTRG.1852	Osclob_v00_mik.OX382150.1G2051.1	MSTRG.1852.1	Osclob_v00_mik.OX382150.1G2051	101	103	213	896	857	1162	1839	772	767	328.25	1079.4	MALE	#N/A	#N/A
OX382150.1	MSTRG.1852	Osclob_v00_mik.OX382150.1G2051.1	MSTRG.1852.2	Osclob_v00_mik.OX382150.1G2051	71	23	327	101	600	787	775	1567	161	130.5	778	MALE	#N/A	#N/A
OX382150.1	MSTRG.1852	Osclob_v00_mik.OX382150.1G2051.1	MSTRG.1852.3	Osclob_v00_mik.OX382150.1G2051	5	4	35	0	1499	5	6	427	49	11	397.2	MALE	#N/A	#N/A
OX382150.1	MSTRG.1852	Osclob_v00_mik.OX382150.1G2051.1	MSTRG.1852.5	Osclob_v00_mik.OX382150.1G2051	275	747	2154	0	2034	0	0	2922	1285	794	1248.2	MALE	#N/A	#N/A
OX382150.1	MSTRG.1852	Osclob_v00_mik.OX382150.1G2051.1	MSTRG.1852.6	Osclob_v00_mik.OX382150.1G2051	200	35	524	619	1026	655	1623	90	1927	344.5	1064.2	MALE	#N/A	#N/A
OX382150.1	MSTRG.1852	Osclob_v00_mik.OX382150.1G2052.1	MSTRG.1852.1	Osclob_v00_mik.OX382150.1G2052	101	103	213	896	857	1162	1839	772	767	328.25	1079.4	MALE	#N/A	#N/A
OX382150.1	MSTRG.1852	Osclob_v00_mik.OX382150.1G2052.1	MSTRG.1852.2	Osclob_v00_mik.OX382150.1G2052	71	23	327	101	600	787	775	1567	161	130.5	778	MALE	#N/A	#N/A
OX382150.1	MSTRG.1852	Osclob_v00_mik.OX382150.1G2052.1	MSTRG.1852.3	Osclob_v00_mik.OX382150.1G2052	5	4	35	0	1499	5	6	427	49	11	397.2	MALE	#N/A	#N/A
OX382150.1	MSTRG.1852	Osclob_v00_mik.OX382150.1G2052.1	MSTRG.1852.5	Osclob_v00_mik.OX382150.1G2052	275	747	2154	0	2034	0	0	2922	1285	794	1248.2	MALE	#N/A	#N/A
OX382150.1	MSTRG.1852	Osclob_v00_mik.OX382150.1G2052.1	MSTRG.1852.6	Osclob_v00_mik.OX382150.1G2052	200	35	524	619	1026	655	1623	90	1927	344.5	1064.2	MALE	#N/A	#N/A
OX382150.1	MSTRG.1852	Osclob_v00_mik.OX382150.1G2052.1	MSTRG.1852.9	Osclob_v00_mik.OX382150.1G2052	0	0	0	312	2	0	0	1	0	78	0.6	MALE	#N/A	#N/A
OX382150.1	MSTRG.1925	Osclob_v00_mik.OX382150.1G2137.1	MSTRG.1925.3	Osclob_v00_mik.OX382150.1G2137	0	0	0	0	0	0	0	294	0	0	58.8	MALE	#N/A	#N/A
OX382150.1	MSTRG.1925	Osclob_v00_mik.OX382150.1G2137.2	MSTRG.1925.3	Osclob_v00_mik.OX382150.1G2137	0	0	0	0	0	0	0	294	0	0	58.8	MALE	#N/A	#N/A
OX382150.1	MSTRG.1927	Osclob_v00_mik.OX382150.1G2107.1	MSTRG.1927.1	Osclob_v00_mik.OX382150.1G2107	0	0	2606	0	0	91	0	7877	0	651.5	1593.6	MALE	2329676	BARK_DROMEProtein bark beetle OS=Drosophila melanogaster OX=7227 GN=bark PE=1 SV=1
OX382150.1	MSTRG.1927	Osclob_v00_mik.OX382150.1G2107.1	MSTRG.1927.2	Osclob_v00_mik.OX382150.1G2107	93	1144	0	1912	2093	0	1309	0	5288	787.25	1738	MALE	2329676	BARK_DROMEProtein bark beetle OS=Drosophila melanogaster OX=7227 GN=bark PE=1 SV=1
OX382150.1	MSTRG.1927	Osclob_v00_mik.OX382150.1G2107.1	MSTRG.1927.3	Osclob_v00_mik.OX382150.1G2107	209	8	1335	0	5977	5770	2	3	6	388	2351.6	MALE	2329676	BARK_DROMEProtein bark beetle OS=Drosophila melanogaster OX=7227 GN=bark PE=1 SV=1
OX382150.1	MSTRG.1927	Osclob_v00_mik.OX382150.1G2107.1	MSTRG.1927.5	Osclob_v00_mik.OX382150.1G2107	0	0	0	0	0	0	0	0	3933	0	786.6	MALE	2329676	BARK_DROMEProtein bark beetle OS=Drosophila melanogaster OX=7227 GN=bark PE=1 SV=1
OX382150.1	MSTRG.1927	Osclob_v00_mik.OX382150.1G2107.1	MSTRG.1927.6	Osclob_v00_mik.OX382150.1G2107	1	0	0	3	0	433	171	0	3	1	121.4	MALE	2329676	BARK_DROMEProtein bark beetle OS=Drosophila melanogaster OX=7227 GN=bark PE=1 SV=1
OX382150.1	MSTRG.1927	Osclob_v00_mik.OX382150.1G2107.1	MSTRG.1927.7	Osclob_v00_mik.OX382150.1G2107	226	69	164	0	2	6	175	3	3	114.75	37.8	MALE	2329676	BARK_DROMEProtein bark beetle OS=Drosophila melanogaster OX=7227 GN=bark PE=1 SV=1
OX382150.1	MSTRG.1927	Osclob_v00_mik.OX382150.1G2107.1	MSTRG.1927.8	Osclob_v00_mik.OX382150.1G2107	0	0	0	0	0	580	0	0	2	0	116.4	MALE	2329676	BARK_DROMEProtein bark beetle OS=Drosophila melanogaster OX=7227 GN=bark PE=1 SV=1
OX382150.1	MSTRG.1927	Osclob_v00_mik.OX382150.1G2107.1	MSTRG.1927.9	Osclob_v00_mik.OX382150.1G2107	0	0	0	28	0	372	0	0	0	7	74.4	MALE	2329676	BARK_DROMEProtein bark beetle OS=Drosophila melanogaster OX=7227 GN=bark PE=1 SV=1
OX382150.1	MSTRG.1927	Osclob_v00_mik.OX382150.1G2107.1	MSTRG.1927.10	Osclob_v00_mik.OX382150.1G2107	245	38	65	710	457	125	154	1747	481	264.5	592.8	MALE	2329676	BARK_DROMEProtein bark beetle OS=Drosophila melanogaster OX=7227 GN=bark PE=1 SV=1
OX382150.1	MSTRG.1927	Osclob_v00_mik.OX382150.1G2107.1	MSTRG.1927.12	Osclob_v00_mik.OX382150.1G2107	975	307	600	284	2564	3344	624	1123	1228	541.5	1776.6	MALE	2329676	BARK_DROMEProtein bark beetle OS=Drosophila melanogaster OX=7227 GN=bark PE=1 SV=1
OX382150.1	MSTRG.1927	Osclob_v00_mik.OX382150.1G2107.1	MSTRG.1927.13	Osclob_v00_mik.OX382150.1G2107	10	0	240	0	74	0	0	0	0	62.5	14.8	MALE	2329676	BARK_DROMEProtein bark beetle OS=Drosophila melanogaster OX=7227 GN=bark PE=1 SV=1
OX382150.1	MSTRG.1927	Osclob_v00_mik.OX382150.1G2107.1	MSTRG.1927.14	Osclob_v00_mik.OX382150.1G2107	0	0	5	0	0	0	0	0	0	1.25	0	MALE	2329676	BARK_DROMEProtein bark beetle OS=Drosophila melanogaster OX=7227 GN=bark PE=1 SV=1
OX382150.1	MSTRG.1927	Osclob_v00_mik.OX382150.1G2107.1	MSTRG.1927.17	Osclob_v00_mik.OX382150.1G2107	0	0	0	0	0	0	333	0	118	0	90.2	MALE	2329676	BARK_DROMEProtein bark beetle OS=Drosophila melanogaster OX=7227 GN=bark PE=1 SV=1
OX382150.1	MSTRG.1976	Osclob_v00_mik.OX382150.1G2169.1	MSTRG.1976.1	Osclob_v00_mik.OX382150.1G2169	0	0	0	0	0	0	0	0	405	0	81	MALE	#N/A	#N/A
OX382150.1	MSTRG.1997	Osclob_v00_mik.OX382150.1G2190.1	MSTRG.1997.1	Osclob_v00_mik.OX382150.1G2190	0	0	0	0	441	31	70	76	0	0	123.6	MALE	#N/A	#N/A
OX382150.1	MSTRG.1997	Osclob_v00_mik.OX382150.1G2190.1	MSTRG.1997.2	Osclob_v00_mik.OX382150.1G2190	52	80	144	0	17	178	86	18	89	69	77.6	MALE	#N/A	#N/A
OX382150.1	MSTRG.1997	Osclob_v00_mik.OX382150.1G2190.1	MSTRG.1997.3	Osclob_v00_mik.OX382150.1G2190	86	174	11	0	46	54	34	268	0	67.75	80.4	MALE	#N/A	#N/A
OX382150.1	MSTRG.1997	Osclob_v00_mik.OX382150.1G2190.1	MSTRG.1997.4	Osclob_v00_mik.OX382150.1G2190	0	0	151	211	0	0	0	0	0	90.5	0	MALE	#N/A	#N/A
OX382151.1	MSTRG.2027	Osclob_v00_mik.OX382151.1G35.1	MSTRG.2027.1	Osclob_v00_mik.OX382151.1G35	10932	3764	5140	7567	5470	12077	1588	3725	22527	6850.75	9077.4	MALE	#N/A	#N/A
OX382151.1	MSTRG.2027	Osclob_v00_mik.OX382151.1G35.1	MSTRG.2027.3	Osclob_v00_mik.OX382151.1G35	777	428	3520	2401	4656	2679	2718	7524	109	1781.5	3537.2	MALE	#N/A	#N/A
OX382151.1	MSTRG.2091	Osclob_v00_mik.OX382151.1G99.1	MSTRG.2091.1	Osclob_v00_mik.OX382151.1G99	9	11	20	0	0	590	0	38	43	10	134.2	MALE	1621223	TRM1_MOUSEtRNA (guanine(26)-N(2))-dimethyltransferase OS=Mus musculus OX=10090 GN=Trmt1 PE=1 SV=2
OX382151.1	MSTRG.2091	Osclob_v00_mik.OX382151.1G99.1	MSTRG.2091.2	Osclob_v00_mik.OX382151.1G99	15	18	16	608	147	1	286	42	39	164.25	103	MALE	1621223	TRM1_MOUSEtRNA (guanine(26)-N(2))-dimethyltransferase OS=Mus musculus OX=10090 GN=Trmt1 PE=1 SV=2
OX382151.1	MSTRG.2091	Osclob_v00_mik.OX382151.1G99.1	MSTRG.2091.3	Osclob_v00_mik.OX382151.1G99	53	0	0	0	541	9	0	405	632	13.25	317.4	MALE	1621223	TRM1_MOUSEtRNA (guanine(26)-N(2))-dimethyltransferase OS=Mus musculus OX=10090 GN=Trmt1 PE=1 SV=2
OX382151.1	MSTRG.2103	Osclob_v00_mik.OX382151.1G112.1	MSTRG.2103.1	Osclob_v00_mik.OX382151.1G112	9427	3698	0	0	11011	37220	0	3780	0	3281.25	10402.2	MALE	1848575	CE112_HUMANCentrosomal protein of 112 kDa OS=Homo sapiens OX=9606 GN=CEP112 PE=1 SV=2
OX382151.1	MSTRG.2103	Osclob_v00_mik.OX382151.1G112.1	MSTRG.2103.2	Osclob_v00_mik.OX382151.1G112	243	1571	391	1154	237	75	174	346	1069	839.75	380.2	MALE	1848575	CE112_HUMANCentrosomal protein of 112 kDa OS=Homo sapiens OX=9606 GN=CEP112 PE=1 SV=2
OX382151.1	MSTRG.2103	Osclob_v00_mik.OX382151.1G112.1	MSTRG.2103.3	Osclob_v00_mik.OX382151.1G112	551	67	148	4	47	373	0	67	549	192.5	207.2	MALE	1848575	CE112_HUMANCentrosomal protein of 112 kDa OS=Homo sapiens OX=9606 GN=CEP112 PE=1 SV=2
OX382151.1	MSTRG.2103	Osclob_v00_mik.OX382151.1G112.1	MSTRG.2103.4	Osclob_v00_mik.OX382151.1G112	0	0	1435	1319	27955	0	13017	14194	4651	688.5	11963.4	MALE	1848575	CE112_HUMANCentrosomal protein of 112 kDa OS=Homo sapiens OX=9606 GN=CEP112 PE=1 SV=2
OX382151.1	MSTRG.2103	Osclob_v00_mik.OX382151.1G112.1	MSTRG.2103.5	Osclob_v00_mik.OX382151.1G112	256	329	418	0	607	713	1143	580	1126	250.75	833.8	MALE	1848575	CE112_HUMANCentrosomal protein of 112 kDa OS=Homo sapiens OX=9606 GN=CEP112 PE=1 SV=2
OX382151.1	MSTRG.2103	Osclob_v00_mik.OX382151.1G112.1	MSTRG.2103.7	Osclob_v00_mik.OX382151.1G112	0	0	1622	0	185	0	0	0	0	405.5	37	MALE	1848575	CE112_HUMANCentrosomal protein of 112 kDa OS=Homo sapiens OX=9606 GN=CEP112 PE=1 SV=2
OX382151.1	MSTRG.2103	Osclob_v00_mik.OX382151.1G112.1	MSTRG.2103.8	Osclob_v00_mik.OX382151.1G112	306	1537	1136	1781	293	32	1186	426	3755	1190	1138.4	MALE	1848575	CE112_HUMANCentrosomal protein of 112 kDa OS=Homo sapiens OX=9606 GN=CEP112 PE=1 SV=2
OX382151.1	MSTRG.2103	Osclob_v00_mik.OX382151.1G112.1	MSTRG.2103.10	Osclob_v00_mik.OX382151.1G112	0	0	0	0	0	0	0	464	0	0	92.8	MALE	1848575	CE112_HUMANCentrosomal protein of 112 kDa OS=Homo sapiens OX=9606 GN=CEP112 PE=1 SV=2
OX382151.1	MSTRG.2114	Osclob_v00_mik.OX382151.1G123.1	MSTRG.2114.1	Osclob_v00_mik.OX382151.1G123	2251	2003	3307	1461	4218	3897	3821	4111	4384	2255.5	4086.2	MALE	#N/A	#N/A
OX382151.1	MSTRG.2114	Osclob_v00_mik.OX382151.1G123.1	MSTRG.2114.2	Osclob_v00_mik.OX382151.1G123	1143	0	234	0	115	47	0	134	33	344.25	65.8	MALE	#N/A	#N/A
OX382151.1	MSTRG.2114	Osclob_v00_mik.OX382151.1G123.1	MSTRG.2114.4	Osclob_v00_mik.OX382151.1G123	332	42	2066	11	3714	78	1811	4957	3829	612.75	2877.8	MALE	#N/A	#N/A
OX382151.1	MSTRG.2114	Osclob_v00_mik.OX382151.1G123.1	MSTRG.2114.6	Osclob_v00_mik.OX382151.1G123	7	0	74	75	187	87	0	268	0	39	108.4	MALE	#N/A	#N/A
OX382151.1	MSTRG.2114	Osclob_v00_mik.OX382151.1G123.1	MSTRG.2114.9	Osclob_v00_mik.OX382151.1G123	0	0	0	1713	0	4669	0	0	0	428.25	933.8	MALE	#N/A	#N/A
OX382151.1	MSTRG.2114	Osclob_v00_mik.OX382151.1G123.1	MSTRG.2114.10	Osclob_v00_mik.OX382151.1G123	176	826	332	367	1907	716	0	672	388	425.25	736.6	MALE	#N/A	#N/A
OX382151.1	MSTRG.2114	Osclob_v00_mik.OX382151.1G123.1	MSTRG.2114.11	Osclob_v00_mik.OX382151.1G123	0	6	10	34	204	288	131	0	0	12.5	124.6	MALE	#N/A	#N/A
OX382151.1	MSTRG.2114	Osclob_v00_mik.OX382151.1G123.1	MSTRG.2114.12	Osclob_v00_mik.OX382151.1G123	714	421	863	0	0	0	0	0	0	499.5	0	MALE	#N/A	#N/A
OX382151.1	MSTRG.2114	Osclob_v00_mik.OX382151.1G123.1	MSTRG.2114.13	Osclob_v00_mik.OX382151.1G123	567	0	0	255	0	248	0	370	1712	205.5	466	MALE	#N/A	#N/A
OX382151.1	MSTRG.2114	Osclob_v00_mik.OX382151.1G123.1	MSTRG.2114.14	Osclob_v00_mik.OX382151.1G123	26	25	170	242	354	876	1415	539	307	115.75	698.2	MALE	#N/A	#N/A
OX382151.1	MSTRG.2114	Osclob_v00_mik.OX382151.1G123.1	MSTRG.2114.17	Osclob_v00_mik.OX382151.1G123	306	186	471	528	2373	650	0	2318	1858	372.75	1439.8	MALE	#N/A	#N/A
OX382151.1	MSTRG.2189	Osclob_v00_mik.OX382151.1G205.1	MSTRG.2189.1	Osclob_v00_mik.OX382151.1G205	5206	0	0	8838	3675	0	0	4893	4195	3511	2552.6	MALE	2335046	SEPT3_BOVINNeuronal-specific septin-3 OS=Bos taurus OX=9913 GN=SEPTIN3 PE=2 SV=3
OX382151.1	MSTRG.2189	Osclob_v00_mik.OX382151.1G205.1	MSTRG.2189.2	Osclob_v00_mik.OX382151.1G205	4509	0	1391	0	0	2544	0	4724	1	1475	1453.8	MALE	2335046	SEPT3_BOVINNeuronal-specific septin-3 OS=Bos taurus OX=9913 GN=SEPTIN3 PE=2 SV=3
OX382151.1	MSTRG.2189	Osclob_v00_mik.OX382151.1G205.1	MSTRG.2189.3	Osclob_v00_mik.OX382151.1G205	3065	405	1069	0	1144	2399	0	5617	3738	1134.75	2579.6	MALE	2335046	SEPT3_BOVINNeuronal-specific septin-3 OS=Bos taurus OX=9913 GN=SEPTIN3 PE=2 SV=3
OX382151.1	MSTRG.2189	Osclob_v00_mik.OX382151.1G205.1	MSTRG.2189.4	Osclob_v00_mik.OX382151.1G205	0	0	1840	0	0	0	0	0	2337	460	467.4	MALE	2335046	SEPT3_BOVINNeuronal-specific septin-3 OS=Bos taurus OX=9913 GN=SEPTIN3 PE=2 SV=3
OX382151.1	MSTRG.2189	Osclob_v00_mik.OX382151.1G205.1	MSTRG.2189.5	Osclob_v00_mik.OX382151.1G205	24	38	513	39	1968	50	165	79	716	153.5	595.6	MALE	2335046	SEPT3_BOVINNeuronal-specific septin-3 OS=Bos taurus OX=9913 GN=SEPTIN3 PE=2 SV=3
OX382151.1	MSTRG.2189	Osclob_v00_mik.OX382151.1G205.1	MSTRG.2189.6	Osclob_v00_mik.OX382151.1G205	0	0	1008	0	1099	0	0	0	0	252	219.8	MALE	2335046	SEPT3_BOVINNeuronal-specific septin-3 OS=Bos taurus OX=9913 GN=SEPTIN3 PE=2 SV=3
OX382151.1	MSTRG.2189	Osclob_v00_mik.OX382151.1G205.1	MSTRG.2189.7	Osclob_v00_mik.OX382151.1G205	3145	10546	3782	5304	1724	2074	4348	8521	11551	5694.25	5643.6	MALE	2335046	SEPT3_BOVINNeuronal-specific septin-3 OS=Bos taurus OX=9913 GN=SEPTIN3 PE=2 SV=3
OX382151.1	MSTRG.2189	Osclob_v00_mik.OX382151.1G205.1	MSTRG.2189.8	Osclob_v00_mik.OX382151.1G205	0	0	935	0	1380	1	0	0	0	233.75	276.2	MALE	2335046	SEPT3_BOVINNeuronal-specific septin-3 OS=Bos taurus OX=9913 GN=SEPTIN3 PE=2 SV=3
OX382151.1	MSTRG.2325	Osclob_v00_mik.OX382151.1G423.1	MSTRG.2325.1	Osclob_v00_mik.OX382151.1G423	240	28	744	232	208	258	33	152	18	311	133.8	MALE	#N/A	#N/A
OX382151.1	MSTRG.2325	Osclob_v00_mik.OX382151.1G423.1	MSTRG.2325.2	Osclob_v00_mik.OX382151.1G423	39	58	254	0	329	5	692	1004	642	87.75	534.4	MALE	#N/A	#N/A
OX382151.1	MSTRG.2325	Osclob_v00_mik.OX382151.1G423.1	MSTRG.2325.3	Osclob_v00_mik.OX382151.1G423	0	0	0	0	0	0	0	0	0	0	0	MALE	#N/A	#N/A
OX382151.1	MSTRG.2360	Osclob_v00_mik.OX382151.1G458.1	MSTRG.2360.1	Osclob_v00_mik.OX382151.1G458	3	6	5	46	2	4	12	10	13	15	8.2	MALE	1873428	-
OX382151.1	MSTRG.2360	Osclob_v00_mik.OX382151.1G458.1	MSTRG.2360.3	Osclob_v00_mik.OX382151.1G458	40	0	0	0	646	0	468	0	0	10	222.8	MALE	1873428	-
OX382151.1	MSTRG.2360	Osclob_v00_mik.OX382151.1G458.1	MSTRG.2360.4	Osclob_v00_mik.OX382151.1G458	5	37	12	50	8	74	182	111	0	26	75	MALE	1873428	-
OX382151.1	MSTRG.2409	Osclob_v00_mik.OX382151.1G354.1	MSTRG.2409.1	Osclob_v00_mik.OX382151.1G354	12807	1494	0	370	11167	0	433	5367	2747	3667.75	3942.8	MALE	#N/A	#N/A
OX382151.1	MSTRG.2409	Osclob_v00_mik.OX382151.1G354.1	MSTRG.2409.2	Osclob_v00_mik.OX382151.1G354	16007	23949	11091	5949	5311	7709	4424	6561	14637	14249	7728.4	MALE	#N/A	#N/A
OX382151.1	MSTRG.2409	Osclob_v00_mik.OX382151.1G354.1	MSTRG.2409.4	Osclob_v00_mik.OX382151.1G354	11924	6871	47316	36976	1025	32844	0	618	9049	25771.8	8707.2	MALE	#N/A	#N/A
OX382151.1	MSTRG.2448	Osclob_v00_mik.OX382151.1G405.1	MSTRG.2448.1	Osclob_v00_mik.OX382151.1G405	655	0	0	226	847	0	397	1343	0	220.25	517.4	MALE	#N/A	#N/A
OX382151.1	MSTRG.2448	Osclob_v00_mik.OX382151.1G405.1	MSTRG.2448.2	Osclob_v00_mik.OX382151.1G405	1138	778	512	1718	374	172	1753	4154	60	1036.5	1302.6	MALE	#N/A	#N/A
OX382151.1	MSTRG.2448	Osclob_v00_mik.OX382151.1G405.1	MSTRG.2448.5	Osclob_v00_mik.OX382151.1G405	83	0	0	0	0	0	91	4	0	20.75	19	MALE	#N/A	#N/A
OX382151.1	MSTRG.2448	Osclob_v00_mik.OX382151.1G405.1	MSTRG.2448.6	Osclob_v00_mik.OX382151.1G405	294	0	0	255	1261	0	8	404	0	137.25	334.6	MALE	#N/A	#N/A
OX382151.1	MSTRG.2616	Osclob_v00_mik.OX382151.1G649.1	MSTRG.2616.1	Osclob_v00_mik.OX382151.1G649	6403	7945	4483	10464	24819	12336	13820	22907	28293	7323.75	20435	MALE	#N/A	#N/A
OX382151.1	MSTRG.2616	Osclob_v00_mik.OX382151.1G649.1	MSTRG.2616.4	Osclob_v00_mik.OX382151.1G649	9	0	2	99	0	3	0	0	35	27.5	7.6	MALE	#N/A	#N/A
OX382151.1	MSTRG.2635	Osclob_v00_mik.OX382151.1G663.1	MSTRG.2635.1	Osclob_v00_mik.OX382151.1G663	3285	2043	4736	2080	9033	4161	3006	6067	2781	3036	5009.6	MALE	1252182	WDR90_XENTRWD repeat-containing protein 90 OS=Xenopus tropicalis OX=8364 GN=wdr90 PE=2 SV=1
OX382151.1	MSTRG.2967	Osclob_v00_mik.OX382151.1G1075.1	MSTRG.2967.1	Osclob_v00_mik.OX382151.1G1075	140	210	257	453	10837	3324	1658	5613	1150	265	4516.4	MALE	#N/A	#N/A
OX382151.1	MSTRG.2967	Osclob_v00_mik.OX382151.1G1075.1	MSTRG.2967.2	Osclob_v00_mik.OX382151.1G1075	102	226	142	76	706	5	957	1192	470	136.5	666	MALE	#N/A	#N/A
OX382151.1	MSTRG.2967	Osclob_v00_mik.OX382151.1G1075.1	MSTRG.2967.3	Osclob_v00_mik.OX382151.1G1075	222	0	47	0	294	12	0	0	1180	67.25	297.2	MALE	#N/A	#N/A
OX382151.1	MSTRG.2967	Osclob_v00_mik.OX382151.1G1075.1	MSTRG.2967.4	Osclob_v00_mik.OX382151.1G1075	21	0	421	0	0	15	0	4	69	110.5	17.6	MALE	#N/A	#N/A
OX382151.1	MSTRG.2967	Osclob_v00_mik.OX382151.1G1075.1	MSTRG.2967.5	Osclob_v00_mik.OX382151.1G1075	22	0	7	193	3	12	0	30	41	55.5	17.2	MALE	#N/A	#N/A
OX382151.1	MSTRG.2967	Osclob_v00_mik.OX382151.1G1075.1	MSTRG.2967.6	Osclob_v00_mik.OX382151.1G1075	1205	0	486	205	558	419	160	0	0	474	227.4	MALE	#N/A	#N/A
OX382151.1	MSTRG.2967	Osclob_v00_mik.OX382151.1G1075.1	MSTRG.2967.7	Osclob_v00_mik.OX382151.1G1075	0	207	261	1	2081	116	466	477	445	117.25	717	MALE	#N/A	#N/A
OX382151.1	MSTRG.2967	Osclob_v00_mik.OX382151.1G1075.1	MSTRG.2967.8	Osclob_v00_mik.OX382151.1G1075	0	0	0	0	404	0	0	841	0	0	249	MALE	#N/A	#N/A
OX382151.1	MSTRG.2967	Osclob_v00_mik.OX382151.1G1075.1	MSTRG.2967.10	Osclob_v00_mik.OX382151.1G1075	0	0	0	0	0	0	0	0	508	0	101.6	MALE	#N/A	#N/A
OX382151.1	MSTRG.2967	Osclob_v00_mik.OX382151.1G1075.1	MSTRG.2967.11	Osclob_v00_mik.OX382151.1G1075	0	0	0	0	0	0	0	1	26	0	5.4	MALE	#N/A	#N/A
OX382151.1	MSTRG.2967	Osclob_v00_mik.OX382151.1G1075.1	MSTRG.2967.12	Osclob_v00_mik.OX382151.1G1075	27	7	0	13	130	0	192	353	98	11.75	154.6	MALE	#N/A	#N/A
OX382151.1	MSTRG.2967	Osclob_v00_mik.OX382151.1G1075.1	MSTRG.2967.14	Osclob_v00_mik.OX382151.1G1075	0	0	0	0	486	0	450	24	0	0	192	MALE	#N/A	#N/A
OX382151.1	MSTRG.2967	Osclob_v00_mik.OX382151.1G1075.1	MSTRG.2967.15	Osclob_v00_mik.OX382151.1G1075	80	0	28	671	456	283	236	656	1158	194.75	557.8	MALE	#N/A	#N/A
OX382152.1	MSTRG.3167	Osclob_v00_mik.OX382152.1G98.1	MSTRG.3167.1	Osclob_v00_mik.OX382152.1G98	0	181	15	2468	1044	221	0	39587	0	666	8170.4	MALE	#N/A	#N/A
OX382152.1	MSTRG.3167	Osclob_v00_mik.OX382152.1G98.1	MSTRG.3167.2	Osclob_v00_mik.OX382152.1G98	3761	3094	25749	885	23850	8439	1273	3371	4045	8372.25	8195.6	MALE	#N/A	#N/A
OX382152.1	MSTRG.3167	Osclob_v00_mik.OX382152.1G98.1	MSTRG.3167.3	Osclob_v00_mik.OX382152.1G98	3232	172	18069	0	16111	6386	1185	1336	3132	5368.25	5630	MALE	#N/A	#N/A
OX382152.1	MSTRG.3167	Osclob_v00_mik.OX382152.1G98.1	MSTRG.3167.4	Osclob_v00_mik.OX382152.1G98	26	7	0	730	0	0	3155	1513	0	190.75	933.6	MALE	#N/A	#N/A
OX382152.1	MSTRG.3167	Osclob_v00_mik.OX382152.1G98.1	MSTRG.3167.5	Osclob_v00_mik.OX382152.1G98	168	0	0	0	0	0	0	0	0	42	0	MALE	#N/A	#N/A
OX382152.1	MSTRG.3167	Osclob_v00_mik.OX382152.1G98.1	MSTRG.3167.6	Osclob_v00_mik.OX382152.1G98	100	0	0	0	0	0	0	0	0	25	0	MALE	#N/A	#N/A
OX382152.1	MSTRG.3167	Osclob_v00_mik.OX382152.1G98.1	MSTRG.3167.7	Osclob_v00_mik.OX382152.1G98	10	238	0	0	18	1	1	5	3	62	5.6	MALE	#N/A	#N/A
OX382152.1	MSTRG.3167	Osclob_v00_mik.OX382152.1G98.1	MSTRG.3167.10	Osclob_v00_mik.OX382152.1G98	231	0	0	0	3077	3949	0	1130	1829	57.75	1997	MALE	#N/A	#N/A
OX382152.1	MSTRG.3292	Osclob_v00_mik.OX382152.1G291.1	MSTRG.3292.1	Osclob_v00_mik.OX382152.1G291	1452	1234	1173	1831	1735	2040	1136	2165	1725	1422.5	1760.2	MALE	#N/A	#N/A
OX382152.1	MSTRG.3296	Osclob_v00_mik.OX382152.1G293.1	MSTRG.3296.1	Osclob_v00_mik.OX382152.1G293	12542	2040	6048	3041	713	1354	1310	747	5282	5917.75	1881.2	MALE	2306426	-
OX382152.1	MSTRG.3296	Osclob_v00_mik.OX382152.1G293.1	MSTRG.3296.2	Osclob_v00_mik.OX382152.1G293	535	197	888	0	0	0	0	0	1121	405	224.2	MALE	2306426	-
OX382152.1	MSTRG.3343	Osclob_v00_mik.OX382152.1G306.1	MSTRG.3343.1	Osclob_v00_mik.OX382152.1G306	2423	954	1665	10214	23362	29996	2667	1609	45025	3814	20531.8	MALE	#N/A	#N/A
OX382152.1	MSTRG.3343	Osclob_v00_mik.OX382152.1G306.1	MSTRG.3343.2	Osclob_v00_mik.OX382152.1G306	1	0	83	12	14444	8	7	1265	2	24	3145.2	MALE	#N/A	#N/A
OX382152.1	MSTRG.3343	Osclob_v00_mik.OX382152.1G306.1	MSTRG.3343.3	Osclob_v00_mik.OX382152.1G306	120	50	40	0	20	88	8541	95	67	52.5	1762.2	MALE	#N/A	#N/A
OX382152.1	MSTRG.3343	Osclob_v00_mik.OX382152.1G306.1	MSTRG.3343.4	Osclob_v00_mik.OX382152.1G306	4641	3371	0	2235	0	5627	0	0	40	2561.75	1133.4	MALE	#N/A	#N/A
OX382152.1	MSTRG.3343	Osclob_v00_mik.OX382152.1G306.1	MSTRG.3343.6	Osclob_v00_mik.OX382152.1G306	0	0	0	0	14404	0	0	0	0	0	2880.8	MALE	#N/A	#N/A
OX382152.1	MSTRG.3343	Osclob_v00_mik.OX382152.1G306.1	MSTRG.3343.8	Osclob_v00_mik.OX382152.1G306	43	60	2942	0	37	0	14	766	0	761.25	163.4	MALE	#N/A	#N/A
OX382152.1	MSTRG.3343	Osclob_v00_mik.OX382152.1G306.1	MSTRG.3343.9	Osclob_v00_mik.OX382152.1G306	155	224	352	6366	25	43	337	455	64	1774.25	184.8	MALE	#N/A	#N/A
OX382152.1	MSTRG.3343	Osclob_v00_mik.OX382152.1G306.1	MSTRG.3343.10	Osclob_v00_mik.OX382152.1G306	0	0	0	40	2	0	582	1434	20	10	407.6	MALE	#N/A	#N/A
OX382152.1	MSTRG.3343	Osclob_v00_mik.OX382152.1G306.1	MSTRG.3343.12	Osclob_v00_mik.OX382152.1G306	0	0	10	1	0	0	5	0	0	2.75	1	MALE	#N/A	#N/A
OX382152.1	MSTRG.3343	Osclob_v00_mik.OX382152.1G306.1	MSTRG.3343.15	Osclob_v00_mik.OX382152.1G306	0	1	0	2	0	0	0	0	0	0.75	0	MALE	#N/A	#N/A
OX382152.1	MSTRG.3343	Osclob_v00_mik.OX382152.1G306.1	MSTRG.3343.16	Osclob_v00_mik.OX382152.1G306	69	38	0	0	1	32	0	39	2	26.75	14.8	MALE	#N/A	#N/A
OX382152.1	MSTRG.3343	Osclob_v00_mik.OX382152.1G307.1	MSTRG.3343.1	Osclob_v00_mik.OX382152.1G307	2423	954	1665	10214	23362	29996	2667	1609	45025	3814	20531.8	MALE	#N/A	#N/A
OX382152.1	MSTRG.3343	Osclob_v00_mik.OX382152.1G307.1	MSTRG.3343.2	Osclob_v00_mik.OX382152.1G307	1	0	83	12	14444	8	7	1265	2	24	3145.2	MALE	#N/A	#N/A
OX382152.1	MSTRG.3343	Osclob_v00_mik.OX382152.1G307.1	MSTRG.3343.3	Osclob_v00_mik.OX382152.1G307	120	50	40	0	20	88	8541	95	67	52.5	1762.2	MALE	#N/A	#N/A
OX382152.1	MSTRG.3343	Osclob_v00_mik.OX382152.1G307.1	MSTRG.3343.4	Osclob_v00_mik.OX382152.1G307	4641	3371	0	2235	0	5627	0	0	40	2561.75	1133.4	MALE	#N/A	#N/A
OX382152.1	MSTRG.3343	Osclob_v00_mik.OX382152.1G307.1	MSTRG.3343.6	Osclob_v00_mik.OX382152.1G307	0	0	0	0	14404	0	0	0	0	0	2880.8	MALE	#N/A	#N/A
OX382152.1	MSTRG.3343	Osclob_v00_mik.OX382152.1G307.1	MSTRG.3343.8	Osclob_v00_mik.OX382152.1G307	43	60	2942	0	37	0	14	766	0	761.25	163.4	MALE	#N/A	#N/A
OX382152.1	MSTRG.3343	Osclob_v00_mik.OX382152.1G307.1	MSTRG.3343.9	Osclob_v00_mik.OX382152.1G307	155	224	352	6366	25	43	337	455	64	1774.25	184.8	MALE	#N/A	#N/A
OX382152.1	MSTRG.3343	Osclob_v00_mik.OX382152.1G308.1	MSTRG.3343.1	Osclob_v00_mik.OX382152.1G308	2423	954	1665	10214	23362	29996	2667	1609	45025	3814	20531.8	MALE	#N/A	#N/A
OX382152.1	MSTRG.3343	Osclob_v00_mik.OX382152.1G308.1	MSTRG.3343.2	Osclob_v00_mik.OX382152.1G308	1	0	83	12	14444	8	7	1265	2	24	3145.2	MALE	#N/A	#N/A
OX382152.1	MSTRG.3343	Osclob_v00_mik.OX382152.1G308.1	MSTRG.3343.3	Osclob_v00_mik.OX382152.1G308	120	50	40	0	20	88	8541	95	67	52.5	1762.2	MALE	#N/A	#N/A
OX382152.1	MSTRG.3343	Osclob_v00_mik.OX382152.1G308.1	MSTRG.3343.4	Osclob_v00_mik.OX382152.1G308	4641	3371	0	2235	0	5627	0	0	40	2561.75	1133.4	MALE	#N/A	#N/A
OX382152.1	MSTRG.3343	Osclob_v00_mik.OX382152.1G308.1	MSTRG.3343.6	Osclob_v00_mik.OX382152.1G308	0	0	0	0	14404	0	0	0	0	0	2880.8	MALE	#N/A	#N/A
OX382152.1	MSTRG.3343	Osclob_v00_mik.OX382152.1G308.1	MSTRG.3343.8	Osclob_v00_mik.OX382152.1G308	43	60	2942	0	37	0	14	766	0	761.25	163.4	MALE	#N/A	#N/A
OX382152.1	MSTRG.3343	Osclob_v00_mik.OX382152.1G308.1	MSTRG.3343.9	Osclob_v00_mik.OX382152.1G308	155	224	352	6366	25	43	337	455	64	1774.25	184.8	MALE	#N/A	#N/A
OX382152.1	MSTRG.3343	Osclob_v00_mik.OX382152.1G308.1	MSTRG.3343.10	Osclob_v00_mik.OX382152.1G308	0	0	0	40	2	0	582	1434	20	10	407.6	MALE	#N/A	#N/A
OX382152.1	MSTRG.3343	Osclob_v00_mik.OX382152.1G309.1	MSTRG.3343.1	Osclob_v00_mik.OX382152.1G309	2423	954	1665	10214	23362	29996	2667	1609	45025	3814	20531.8	MALE	1672961	-
OX382152.1	MSTRG.3343	Osclob_v00_mik.OX382152.1G309.1	MSTRG.3343.2	Osclob_v00_mik.OX382152.1G309	1	0	83	12	14444	8	7	1265	2	24	3145.2	MALE	1672961	-
OX382152.1	MSTRG.3343	Osclob_v00_mik.OX382152.1G309.1	MSTRG.3343.3	Osclob_v00_mik.OX382152.1G309	120	50	40	0	20	88	8541	95	67	52.5	1762.2	MALE	1672961	-
OX382152.1	MSTRG.3343	Osclob_v00_mik.OX382152.1G309.1	MSTRG.3343.4	Osclob_v00_mik.OX382152.1G309	4641	3371	0	2235	0	5627	0	0	40	2561.75	1133.4	MALE	1672961	-
OX382152.1	MSTRG.3343	Osclob_v00_mik.OX382152.1G309.1	MSTRG.3343.6	Osclob_v00_mik.OX382152.1G309	0	0	0	0	14404	0	0	0	0	0	2880.8	MALE	1672961	-
OX382152.1	MSTRG.3343	Osclob_v00_mik.OX382152.1G309.1	MSTRG.3343.8	Osclob_v00_mik.OX382152.1G309	43	60	2942	0	37	0	14	766	0	761.25	163.4	MALE	1672961	-
OX382152.1	MSTRG.3431	Osclob_v00_mik.OX382152.1G442.1	MSTRG.3431.1	Osclob_v00_mik.OX382152.1G442	213	101	15	187	254	207	52	203	35	129	150.2	MALE	#N/A	#N/A
OX382152.1	MSTRG.3431	Osclob_v00_mik.OX382152.1G442.1	MSTRG.3431.4	Osclob_v00_mik.OX382152.1G442	1553	408	1504	2721	8295	2538	752	5015	6826	1546.5	4685.2	MALE	#N/A	#N/A
OX382152.1	MSTRG.3431	Osclob_v00_mik.OX382152.1G442.1	MSTRG.3431.5	Osclob_v00_mik.OX382152.1G442	1106	0	2262	0	0	0	0	0	3386	842	677.2	MALE	#N/A	#N/A
OX382152.1	MSTRG.3431	Osclob_v00_mik.OX382152.1G442.1	MSTRG.3431.6	Osclob_v00_mik.OX382152.1G442	1281	7	1927	0	0	23	0	3504	1	803.75	705.6	MALE	#N/A	#N/A
OX382152.1	MSTRG.3435	Osclob_v00_mik.OX382152.1G443.2	MSTRG.3435.1	Osclob_v00_mik.OX382152.1G443	383	1333	1042	249	550	616	97	1475	337	751.75	615	MALE	#N/A	#N/A
OX382152.1	MSTRG.3435	Osclob_v00_mik.OX382152.1G443.2	MSTRG.3435.4	Osclob_v00_mik.OX382152.1G443	58	75	156	0	0	0	0	42	107	72.25	29.8	MALE	#N/A	#N/A
OX382152.1	MSTRG.3435	Osclob_v00_mik.OX382152.1G443.2	MSTRG.3435.5	Osclob_v00_mik.OX382152.1G443	3	116	0	0	0	0	0	0	9	29.75	1.8	MALE	#N/A	#N/A
OX382152.1	MSTRG.3783	Osclob_v00_mik.OX382152.1G845.1	MSTRG.3783.1	Osclob_v00_mik.OX382152.1G845	5043	3273	3298	5244	13115	5511	6318	10808	5283	4214.5	8207	MALE	1603109	TTC5_HUMANTetratricopeptide repeat protein 5 OS=Homo sapiens OX=9606 GN=TTC5 PE=1 SV=2
OX382152.1	MSTRG.3847	Osclob_v00_mik.OX382152.1G915.1	MSTRG.3847.1	Osclob_v00_mik.OX382152.1G915	532	0	0	3	65	0	2	1224	212	133.75	300.6	MALE	#N/A	#N/A
OX382152.1	MSTRG.3847	Osclob_v00_mik.OX382152.1G915.1	MSTRG.3847.2	Osclob_v00_mik.OX382152.1G915	2257	147	7839	767	0	129	174	175	0	2752.5	95.6	MALE	#N/A	#N/A
OX382152.1	MSTRG.3847	Osclob_v00_mik.OX382152.1G915.1	MSTRG.3847.3	Osclob_v00_mik.OX382152.1G915	9436	0	1839	1	5143	0	0	8767	0	2819	2782	MALE	#N/A	#N/A
OX382152.1	MSTRG.3847	Osclob_v00_mik.OX382152.1G915.1	MSTRG.3847.4	Osclob_v00_mik.OX382152.1G915	1062	3405	197	3	1488	24	20830	195	2940	1166.75	5095.4	MALE	#N/A	#N/A
OX382152.1	MSTRG.3847	Osclob_v00_mik.OX382152.1G915.1	MSTRG.3847.5	Osclob_v00_mik.OX382152.1G915	0	0	0	0	3573	3246	0	601	2931	0	2070.2	MALE	#N/A	#N/A
OX382152.1	MSTRG.3847	Osclob_v00_mik.OX382152.1G915.1	MSTRG.3847.6	Osclob_v00_mik.OX382152.1G915	319	327	1535	6928	1288	159	98	660	2212	2277.25	883.4	MALE	#N/A	#N/A
OX382152.1	MSTRG.3847	Osclob_v00_mik.OX382152.1G915.1	MSTRG.3847.7	Osclob_v00_mik.OX382152.1G915	0	37	0	0	2819	25035	412	11351	8541	9.25	9631.6	MALE	#N/A	#N/A
OX382152.1	MSTRG.3847	Osclob_v00_mik.OX382152.1G915.1	MSTRG.3847.8	Osclob_v00_mik.OX382152.1G915	0	10631	0	0	19772	0	0	3292	3067	2657.75	5226.2	MALE	#N/A	#N/A
OX382152.1	MSTRG.3847	Osclob_v00_mik.OX382152.1G915.1	MSTRG.3847.13	Osclob_v00_mik.OX382152.1G915	496	2537	196	6225	143	3292	75	1681	10	2363.5	1040.2	MALE	#N/A	#N/A
OX382152.1	MSTRG.3847	Osclob_v00_mik.OX382152.1G915.1	MSTRG.3847.14	Osclob_v00_mik.OX382152.1G915	0	1016	0	0	0	0	0	0	0	254	0	MALE	#N/A	#N/A
OX382152.1	MSTRG.3847	Osclob_v00_mik.OX382152.1G916.2	MSTRG.3847.1	Osclob_v00_mik.OX382152.1G916	532	0	0	3	65	0	2	1224	212	133.75	300.6	MALE	#N/A	#N/A
OX382152.1	MSTRG.3847	Osclob_v00_mik.OX382152.1G916.2	MSTRG.3847.2	Osclob_v00_mik.OX382152.1G916	2257	147	7839	767	0	129	174	175	0	2752.5	95.6	MALE	#N/A	#N/A
OX382152.1	MSTRG.3847	Osclob_v00_mik.OX382152.1G916.2	MSTRG.3847.3	Osclob_v00_mik.OX382152.1G916	9436	0	1839	1	5143	0	0	8767	0	2819	2782	MALE	#N/A	#N/A
OX382152.1	MSTRG.3847	Osclob_v00_mik.OX382152.1G916.2	MSTRG.3847.4	Osclob_v00_mik.OX382152.1G916	1062	3405	197	3	1488	24	20830	195	2940	1166.75	5095.4	MALE	#N/A	#N/A
OX382152.1	MSTRG.3847	Osclob_v00_mik.OX382152.1G916.2	MSTRG.3847.5	Osclob_v00_mik.OX382152.1G916	0	0	0	0	3573	3246	0	601	2931	0	2070.2	MALE	#N/A	#N/A
OX382152.1	MSTRG.3847	Osclob_v00_mik.OX382152.1G916.2	MSTRG.3847.6	Osclob_v00_mik.OX382152.1G916	319	327	1535	6928	1288	159	98	660	2212	2277.25	883.4	MALE	#N/A	#N/A
OX382152.1	MSTRG.3847	Osclob_v00_mik.OX382152.1G916.2	MSTRG.3847.7	Osclob_v00_mik.OX382152.1G916	0	37	0	0	2819	25035	412	11351	8541	9.25	9631.6	MALE	#N/A	#N/A
OX382152.1	MSTRG.3847	Osclob_v00_mik.OX382152.1G916.2	MSTRG.3847.8	Osclob_v00_mik.OX382152.1G916	0	10631	0	0	19772	0	0	3292	3067	2657.75	5226.2	MALE	#N/A	#N/A
OX382152.1	MSTRG.3847	Osclob_v00_mik.OX382152.1G916.2	MSTRG.3847.13	Osclob_v00_mik.OX382152.1G916	496	2537	196	6225	143	3292	75	1681	10	2363.5	1040.2	MALE	#N/A	#N/A
OX382152.1	MSTRG.3847	Osclob_v00_mik.OX382152.1G916.2	MSTRG.3847.14	Osclob_v00_mik.OX382152.1G916	0	1016	0	0	0	0	0	0	0	254	0	MALE	#N/A	#N/A
OX382152.1	MSTRG.3847	Osclob_v00_mik.OX382152.1G916.2	MSTRG.3847.15	Osclob_v00_mik.OX382152.1G916	2180	0	2427	245	25	1	0	191	7	1213	44.8	MALE	#N/A	#N/A
OX382152.1	MSTRG.3847	Osclob_v00_mik.OX382152.1G917.1	MSTRG.3847.1	Osclob_v00_mik.OX382152.1G917	532	0	0	3	65	0	2	1224	212	133.75	300.6	MALE	2646964	ZPR1_BOVINZinc finger protein ZPR1 OS=Bos taurus OX=9913 GN=ZNF259 PE=2 SV=1
OX382152.1	MSTRG.3847	Osclob_v00_mik.OX382152.1G917.1	MSTRG.3847.2	Osclob_v00_mik.OX382152.1G917	2257	147	7839	767	0	129	174	175	0	2752.5	95.6	MALE	2646964	ZPR1_BOVINZinc finger protein ZPR1 OS=Bos taurus OX=9913 GN=ZNF259 PE=2 SV=1
OX382152.1	MSTRG.3847	Osclob_v00_mik.OX382152.1G917.1	MSTRG.3847.3	Osclob_v00_mik.OX382152.1G917	9436	0	1839	1	5143	0	0	8767	0	2819	2782	MALE	2646964	ZPR1_BOVINZinc finger protein ZPR1 OS=Bos taurus OX=9913 GN=ZNF259 PE=2 SV=1
OX382152.1	MSTRG.3847	Osclob_v00_mik.OX382152.1G917.1	MSTRG.3847.4	Osclob_v00_mik.OX382152.1G917	1062	3405	197	3	1488	24	20830	195	2940	1166.75	5095.4	MALE	2646964	ZPR1_BOVINZinc finger protein ZPR1 OS=Bos taurus OX=9913 GN=ZNF259 PE=2 SV=1
OX382152.1	MSTRG.3847	Osclob_v00_mik.OX382152.1G917.1	MSTRG.3847.5	Osclob_v00_mik.OX382152.1G917	0	0	0	0	3573	3246	0	601	2931	0	2070.2	MALE	2646964	ZPR1_BOVINZinc finger protein ZPR1 OS=Bos taurus OX=9913 GN=ZNF259 PE=2 SV=1
OX382152.1	MSTRG.3847	Osclob_v00_mik.OX382152.1G917.1	MSTRG.3847.6	Osclob_v00_mik.OX382152.1G917	319	327	1535	6928	1288	159	98	660	2212	2277.25	883.4	MALE	2646964	ZPR1_BOVINZinc finger protein ZPR1 OS=Bos taurus OX=9913 GN=ZNF259 PE=2 SV=1
OX382152.1	MSTRG.3847	Osclob_v00_mik.OX382152.1G917.1	MSTRG.3847.7	Osclob_v00_mik.OX382152.1G917	0	37	0	0	2819	25035	412	11351	8541	9.25	9631.6	MALE	2646964	ZPR1_BOVINZinc finger protein ZPR1 OS=Bos taurus OX=9913 GN=ZNF259 PE=2 SV=1
OX382152.1	MSTRG.3847	Osclob_v00_mik.OX382152.1G917.1	MSTRG.3847.8	Osclob_v00_mik.OX382152.1G917	0	10631	0	0	19772	0	0	3292	3067	2657.75	5226.2	MALE	2646964	ZPR1_BOVINZinc finger protein ZPR1 OS=Bos taurus OX=9913 GN=ZNF259 PE=2 SV=1
OX382152.1	MSTRG.3847	Osclob_v00_mik.OX382152.1G917.1	MSTRG.3847.13	Osclob_v00_mik.OX382152.1G917	496	2537	196	6225	143	3292	75	1681	10	2363.5	1040.2	MALE	2646964	ZPR1_BOVINZinc finger protein ZPR1 OS=Bos taurus OX=9913 GN=ZNF259 PE=2 SV=1
OX382152.1	MSTRG.3847	Osclob_v00_mik.OX382152.1G917.1	MSTRG.3847.14	Osclob_v00_mik.OX382152.1G917	0	1016	0	0	0	0	0	0	0	254	0	MALE	2646964	ZPR1_BOVINZinc finger protein ZPR1 OS=Bos taurus OX=9913 GN=ZNF259 PE=2 SV=1
OX382152.1	MSTRG.3847	Osclob_v00_mik.OX382152.1G917.1	MSTRG.3847.15	Osclob_v00_mik.OX382152.1G917	2180	0	2427	245	25	1	0	191	7	1213	44.8	MALE	2646964	ZPR1_BOVINZinc finger protein ZPR1 OS=Bos taurus OX=9913 GN=ZNF259 PE=2 SV=1
OX382153.1	MSTRG.4194	Osclob_v00_mik.OX382153.1G301.1	MSTRG.4194.3	Osclob_v00_mik.OX382153.1G301	0	0	1637	0	0	0	0	0	0	409.25	0	MALE	#N/A	#N/A
OX382153.1	MSTRG.4196	Osclob_v00_mik.OX382153.1G308.1	MSTRG.4196.1	Osclob_v00_mik.OX382153.1G308	106	171	122	669	366	1338	316	584	1047	267	730.2	MALE	922794	SMR8A_DANREGuanine nucleotide exchange protein smcr8a OS=Danio rerio OX=7955 GN=smcr8a PE=3 SV=1
OX382153.1	MSTRG.4196	Osclob_v00_mik.OX382153.1G308.1	MSTRG.4196.2	Osclob_v00_mik.OX382153.1G308	11	11	11	0	1364	0	0	0	0	8.25	272.8	MALE	922794	SMR8A_DANREGuanine nucleotide exchange protein smcr8a OS=Danio rerio OX=7955 GN=smcr8a PE=3 SV=1
OX382153.1	MSTRG.4196	Osclob_v00_mik.OX382153.1G308.1	MSTRG.4196.4	Osclob_v00_mik.OX382153.1G308	1123	12	998	53	1003	44	16	625	1038	546.5	545.2	MALE	922794	SMR8A_DANREGuanine nucleotide exchange protein smcr8a OS=Danio rerio OX=7955 GN=smcr8a PE=3 SV=1
OX382153.1	MSTRG.4388	Osclob_v00_mik.OX382153.1G322.1	MSTRG.4388.1	Osclob_v00_mik.OX382153.1G322	0	1453	0	6341	30	0	2219	2809	48	1948.5	1021.2	MALE	2337561	ADA10_BOVINDisintegrin and metalloproteinase domain-containing protein 10 OS=Bos taurus OX=9913 GN=ADAM10 PE=1 SV=1
OX382153.1	MSTRG.4388	Osclob_v00_mik.OX382153.1G322.1	MSTRG.4388.2	Osclob_v00_mik.OX382153.1G322	135	0	2878	0	8129	4577	38	3787	6305	753.25	4567.2	MALE	2337561	ADA10_BOVINDisintegrin and metalloproteinase domain-containing protein 10 OS=Bos taurus OX=9913 GN=ADAM10 PE=1 SV=1
OX382153.1	MSTRG.4388	Osclob_v00_mik.OX382153.1G322.1	MSTRG.4388.3	Osclob_v00_mik.OX382153.1G322	7924	0	0	0	0	0	0	1516	0	1981	303.2	MALE	2337561	ADA10_BOVINDisintegrin and metalloproteinase domain-containing protein 10 OS=Bos taurus OX=9913 GN=ADAM10 PE=1 SV=1
OX382153.1	MSTRG.4508	Osclob_v00_mik.OX382153.1G511.1	MSTRG.4508.1	Osclob_v00_mik.OX382153.1G511	431	124	275	105	99	129	74	355	419	233.75	215.2	MALE	1582887	AMT2_CAEELPutative ammonium transporter 2 OS=Caenorhabditis elegans OX=6239 GN=amt-2 PE=3 SV=3
OX382153.1	MSTRG.4508	Osclob_v00_mik.OX382153.1G511.1	MSTRG.4508.2	Osclob_v00_mik.OX382153.1G511	205	6	281	151	961	66	20	325	41	160.75	282.6	MALE	1582887	AMT2_CAEELPutative ammonium transporter 2 OS=Caenorhabditis elegans OX=6239 GN=amt-2 PE=3 SV=3
OX382153.1	MSTRG.4676	Osclob_v00_mik.OX382153.1G685.1	MSTRG.4676.2	Osclob_v00_mik.OX382153.1G685	17626	62	2190	95	16273	5016	2526	1990	112	4993.25	5183.4	MALE	#N/A	#N/A
OX382153.1	MSTRG.4676	Osclob_v00_mik.OX382153.1G685.1	MSTRG.4676.3	Osclob_v00_mik.OX382153.1G685	0	0	7740	0	16220	0	0	36077	29487	1935	16356.8	MALE	#N/A	#N/A
OX382153.1	MSTRG.4676	Osclob_v00_mik.OX382153.1G685.1	MSTRG.4676.4	Osclob_v00_mik.OX382153.1G685	0	2187	5005	0	3845	0	0	9205	16570	1798	5924	MALE	#N/A	#N/A
OX382153.1	MSTRG.4676	Osclob_v00_mik.OX382153.1G685.1	MSTRG.4676.5	Osclob_v00_mik.OX382153.1G685	6876	3300	39	12744	3439	2999	20836	629	364	5739.75	5653.4	MALE	#N/A	#N/A
OX382153.1	MSTRG.4676	Osclob_v00_mik.OX382153.1G685.1	MSTRG.4676.6	Osclob_v00_mik.OX382153.1G685	0	0	2213	0	14648	0	0	3552	153	553.25	3670.6	MALE	#N/A	#N/A
OX382153.1	MSTRG.4676	Osclob_v00_mik.OX382153.1G685.1	MSTRG.4676.7	Osclob_v00_mik.OX382153.1G685	4626	9084	15386	14758	43489	48848	6519	16265	14092	10963.5	25842.6	MALE	#N/A	#N/A
OX382153.1	MSTRG.4676	Osclob_v00_mik.OX382153.1G685.1	MSTRG.4676.8	Osclob_v00_mik.OX382153.1G685	0	0	0	0	0	0	760	0	0	0	152	MALE	#N/A	#N/A
OX382153.1	MSTRG.4676	Osclob_v00_mik.OX382153.1G685.1	MSTRG.4676.11	Osclob_v00_mik.OX382153.1G685	15353	20867	13210	25165	28147	50355	18232	32847	47516	18648.8	35419.4	MALE	#N/A	#N/A
OX382153.1	MSTRG.4676	Osclob_v00_mik.OX382153.1G685.1	MSTRG.4676.12	Osclob_v00_mik.OX382153.1G685	7541	0	11907	0	15137	0	0	11865	0	4862	5400.4	MALE	#N/A	#N/A
OX382153.1	MSTRG.4676	Osclob_v00_mik.OX382153.1G689.1	MSTRG.4676.2	Osclob_v00_mik.OX382153.1G689	17626	62	2190	95	16273	5016	2526	1990	112	4993.25	5183.4	MALE	#N/A	#N/A
OX382153.1	MSTRG.4676	Osclob_v00_mik.OX382153.1G689.1	MSTRG.4676.3	Osclob_v00_mik.OX382153.1G689	0	0	7740	0	16220	0	0	36077	29487	1935	16356.8	MALE	#N/A	#N/A
OX382153.1	MSTRG.4676	Osclob_v00_mik.OX382153.1G689.1	MSTRG.4676.4	Osclob_v00_mik.OX382153.1G689	0	2187	5005	0	3845	0	0	9205	16570	1798	5924	MALE	#N/A	#N/A
OX382153.1	MSTRG.4676	Osclob_v00_mik.OX382153.1G689.1	MSTRG.4676.5	Osclob_v00_mik.OX382153.1G689	6876	3300	39	12744	3439	2999	20836	629	364	5739.75	5653.4	MALE	#N/A	#N/A
OX382153.1	MSTRG.4676	Osclob_v00_mik.OX382153.1G689.1	MSTRG.4676.6	Osclob_v00_mik.OX382153.1G689	0	0	2213	0	14648	0	0	3552	153	553.25	3670.6	MALE	#N/A	#N/A
OX382153.1	MSTRG.4676	Osclob_v00_mik.OX382153.1G689.1	MSTRG.4676.7	Osclob_v00_mik.OX382153.1G689	4626	9084	15386	14758	43489	48848	6519	16265	14092	10963.5	25842.6	MALE	#N/A	#N/A
OX382153.1	MSTRG.4676	Osclob_v00_mik.OX382153.1G689.1	MSTRG.4676.8	Osclob_v00_mik.OX382153.1G689	0	0	0	0	0	0	760	0	0	0	152	MALE	#N/A	#N/A
OX382153.1	MSTRG.4676	Osclob_v00_mik.OX382153.1G689.1	MSTRG.4676.11	Osclob_v00_mik.OX382153.1G689	15353	20867	13210	25165	28147	50355	18232	32847	47516	18648.8	35419.4	MALE	#N/A	#N/A
OX382153.1	MSTRG.4676	Osclob_v00_mik.OX382153.1G689.1	MSTRG.4676.12	Osclob_v00_mik.OX382153.1G689	7541	0	11907	0	15137	0	0	11865	0	4862	5400.4	MALE	#N/A	#N/A
OX382153.1	MSTRG.4715	Osclob_v00_mik.OX382153.1G726.1	MSTRG.4715.1	Osclob_v00_mik.OX382153.1G726	3150	1825	3376	2291	5893	4226	2622	5577	10433	2660.5	5750.2	MALE	#N/A	#N/A
OX382153.1	MSTRG.4715	Osclob_v00_mik.OX382153.1G726.1	MSTRG.4715.2	Osclob_v00_mik.OX382153.1G726	248	160	70	0	1905	0	0	1634	160	119.5	739.8	MALE	#N/A	#N/A
OX382153.1	MSTRG.4715	Osclob_v00_mik.OX382153.1G727.1	MSTRG.4715.1	Osclob_v00_mik.OX382153.1G727	3150	1825	3376	2291	5893	4226	2622	5577	10433	2660.5	5750.2	MALE	1931409	XPOT_HUMANExportin-T OS=Homo sapiens OX=9606 GN=XPOT PE=1 SV=2
OX382153.1	MSTRG.4715	Osclob_v00_mik.OX382153.1G727.1	MSTRG.4715.2	Osclob_v00_mik.OX382153.1G727	248	160	70	0	1905	0	0	1634	160	119.5	739.8	MALE	1931409	XPOT_HUMANExportin-T OS=Homo sapiens OX=9606 GN=XPOT PE=1 SV=2
OX382153.1	MSTRG.4757	Osclob_v00_mik.OX382153.1G792.1	MSTRG.4757.1	Osclob_v00_mik.OX382153.1G792	0	0	138	0	0	0	1673	0	0	34.5	334.6	MALE	#N/A	#N/A
OX382153.1	MSTRG.4757	Osclob_v00_mik.OX382153.1G792.1	MSTRG.4757.2	Osclob_v00_mik.OX382153.1G792	360	0	45	0	375	311	944	1914	153	101.25	739.4	MALE	#N/A	#N/A
OX382153.1	MSTRG.4757	Osclob_v00_mik.OX382153.1G792.1	MSTRG.4757.3	Osclob_v00_mik.OX382153.1G792	0	146	5833	12	6338	3091	1590	1361	1977	1497.75	2871.4	MALE	#N/A	#N/A
OX382153.1	MSTRG.4757	Osclob_v00_mik.OX382153.1G792.1	MSTRG.4757.4	Osclob_v00_mik.OX382153.1G792	0	27	6	2589	1790	2373	783	918	500	655.5	1272.8	MALE	#N/A	#N/A
OX382153.1	MSTRG.4757	Osclob_v00_mik.OX382153.1G792.1	MSTRG.4757.5	Osclob_v00_mik.OX382153.1G792	1518	0	0	0	0	0	0	2889	0	379.5	577.8	MALE	#N/A	#N/A
OX382153.1	MSTRG.4757	Osclob_v00_mik.OX382153.1G792.1	MSTRG.4757.6	Osclob_v00_mik.OX382153.1G792	0	0	0	0	0	0	0	722	0	0	144.4	MALE	#N/A	#N/A
OX382153.1	MSTRG.4757	Osclob_v00_mik.OX382153.1G792.1	MSTRG.4757.7	Osclob_v00_mik.OX382153.1G792	67	0	2951	0	0	0	0	715	0	754.5	143	MALE	#N/A	#N/A
OX382153.1	MSTRG.4757	Osclob_v00_mik.OX382153.1G792.1	MSTRG.4757.8	Osclob_v00_mik.OX382153.1G792	0	1467	0	0	0	0	0	0	0	366.75	0	MALE	#N/A	#N/A
OX382153.1	MSTRG.4782	Osclob_v00_mik.OX382153.1G834.1	MSTRG.4782.1	Osclob_v00_mik.OX382153.1G834	8684	5047	4975	7426	7137	10436	5145	478	6107	6533	5860.6	MALE	#N/A	#N/A
OX382153.1	MSTRG.4782	Osclob_v00_mik.OX382153.1G834.1	MSTRG.4782.2	Osclob_v00_mik.OX382153.1G834	162	0	0	399	0	197	1319	6128	0	140.25	1528.8	MALE	#N/A	#N/A
OX382153.1	MSTRG.4782	Osclob_v00_mik.OX382153.1G834.1	MSTRG.4782.4	Osclob_v00_mik.OX382153.1G834	66	288	798	505	5407	49	23	3649	3984	414.25	2622.4	MALE	#N/A	#N/A
OX382153.1	MSTRG.4783	Osclob_v00_mik.OX382153.1G831.1	MSTRG.4783.1	Osclob_v00_mik.OX382153.1G831	8732	8219	12316	7134	11393	13471	7406	18139	19680	9100.25	14017.8	MALE	2677287	FGD6_MOUSEFYVE, RhoGEF and PH domain-containing protein 6 OS=Mus musculus OX=10090 GN=Fgd6 PE=1 SV=2
OX382153.1	MSTRG.4783	Osclob_v00_mik.OX382153.1G831.1	MSTRG.4783.2	Osclob_v00_mik.OX382153.1G831	948	2342	428	0	9920	2534	104	1195	3501	929.5	3450.8	MALE	2677287	FGD6_MOUSEFYVE, RhoGEF and PH domain-containing protein 6 OS=Mus musculus OX=10090 GN=Fgd6 PE=1 SV=2
OX382153.1	MSTRG.4783	Osclob_v00_mik.OX382153.1G831.1	MSTRG.4783.3	Osclob_v00_mik.OX382153.1G831	0	0	0	0	0	0	0	0	0	0	0	MALE	2677287	FGD6_MOUSEFYVE, RhoGEF and PH domain-containing protein 6 OS=Mus musculus OX=10090 GN=Fgd6 PE=1 SV=2
OX382153.1	MSTRG.4783	Osclob_v00_mik.OX382153.1G831.1	MSTRG.4783.4	Osclob_v00_mik.OX382153.1G831	29	25	12	145	40	10	67	48	23	52.75	37.6	MALE	2677287	FGD6_MOUSEFYVE, RhoGEF and PH domain-containing protein 6 OS=Mus musculus OX=10090 GN=Fgd6 PE=1 SV=2
OX382153.1	MSTRG.4783	Osclob_v00_mik.OX382153.1G831.1	MSTRG.4783.6	Osclob_v00_mik.OX382153.1G831	0	7	9	0	2	7	0	0	0	4	1.8	MALE	2677287	FGD6_MOUSEFYVE, RhoGEF and PH domain-containing protein 6 OS=Mus musculus OX=10090 GN=Fgd6 PE=1 SV=2
OX382153.1	MSTRG.4783	Osclob_v00_mik.OX382153.1G831.1	MSTRG.4783.8	Osclob_v00_mik.OX382153.1G831	11	0	30	0	597	0	0	18	1137	10.25	350.4	MALE	2677287	FGD6_MOUSEFYVE, RhoGEF and PH domain-containing protein 6 OS=Mus musculus OX=10090 GN=Fgd6 PE=1 SV=2
OX382153.1	MSTRG.4826	Osclob_v00_mik.OX382153.1G887.1	MSTRG.4826.1	Osclob_v00_mik.OX382153.1G887	61047	23	52046	2	63254	102778	14736	59092	120385	28279.5	72049	MALE	1097477	HMCN1_MOUSEHemicentin-1 OS=Mus musculus OX=10090 GN=Hmcn1 PE=1 SV=1
OX382153.1	MSTRG.4826	Osclob_v00_mik.OX382153.1G887.1	MSTRG.4826.2	Osclob_v00_mik.OX382153.1G887	195	14916	44	43493	18221	0	0	3852	9598	14662	6334.2	MALE	1097477	HMCN1_MOUSEHemicentin-1 OS=Mus musculus OX=10090 GN=Hmcn1 PE=1 SV=1
OX382153.1	MSTRG.4826	Osclob_v00_mik.OX382153.1G887.1	MSTRG.4826.5	Osclob_v00_mik.OX382153.1G887	2534	1250	2651	178	3593	4355	5105	6331	5401	1653.25	4957	MALE	1097477	HMCN1_MOUSEHemicentin-1 OS=Mus musculus OX=10090 GN=Hmcn1 PE=1 SV=1
OX382153.1	MSTRG.4826	Osclob_v00_mik.OX382153.1G887.1	MSTRG.4826.9	Osclob_v00_mik.OX382153.1G887	13	11	83	0	14	356	0	11	2	26.75	76.6	MALE	1097477	HMCN1_MOUSEHemicentin-1 OS=Mus musculus OX=10090 GN=Hmcn1 PE=1 SV=1
OX382153.1	MSTRG.4826	Osclob_v00_mik.OX382153.1G887.1	MSTRG.4826.10	Osclob_v00_mik.OX382153.1G887	6	14	33	14	5	90	99	3	5	16.75	40.4	MALE	1097477	HMCN1_MOUSEHemicentin-1 OS=Mus musculus OX=10090 GN=Hmcn1 PE=1 SV=1
OX382153.1	MSTRG.4856	Osclob_v00_mik.OX382153.1G919.1	MSTRG.4856.1	Osclob_v00_mik.OX382153.1G919	1159	0	0	0	3382	1227	1159	0	691	289.75	1291.8	MALE	#N/A	#N/A
OX382153.1	MSTRG.4856	Osclob_v00_mik.OX382153.1G919.1	MSTRG.4856.4	Osclob_v00_mik.OX382153.1G919	19	0	24	538	880	162	0	2160	54	145.25	651.2	MALE	#N/A	#N/A
OX382153.1	MSTRG.4856	Osclob_v00_mik.OX382153.1G919.1	MSTRG.4856.5	Osclob_v00_mik.OX382153.1G919	6411	2921	3803	6049	6408	10924	1749	9305	9003	4796	7477.8	MALE	#N/A	#N/A
OX382153.1	MSTRG.4856	Osclob_v00_mik.OX382153.1G919.2	MSTRG.4856.1	Osclob_v00_mik.OX382153.1G919	1159	0	0	0	3382	1227	1159	0	691	289.75	1291.8	MALE	#N/A	#N/A
OX382153.1	MSTRG.4856	Osclob_v00_mik.OX382153.1G919.2	MSTRG.4856.4	Osclob_v00_mik.OX382153.1G919	19	0	24	538	880	162	0	2160	54	145.25	651.2	MALE	#N/A	#N/A
OX382153.1	MSTRG.4856	Osclob_v00_mik.OX382153.1G919.2	MSTRG.4856.5	Osclob_v00_mik.OX382153.1G919	6411	2921	3803	6049	6408	10924	1749	9305	9003	4796	7477.8	MALE	#N/A	#N/A
OX382154.1	MSTRG.4959	Osclob_v00_mik.OX382154.1G54.1	MSTRG.4959.1	Osclob_v00_mik.OX382154.1G54	5	0	3	0	22	41	20	139	21	2	48.6	MALE	4092441	#N/A
OX382154.1	MSTRG.4959	Osclob_v00_mik.OX382154.1G54.1	MSTRG.4959.2	Osclob_v00_mik.OX382154.1G54	2213	4898	450	1201	341	211	223	1031	416	2190.5	444.4	MALE	4092441	#N/A
OX382154.1	MSTRG.4959	Osclob_v00_mik.OX382154.1G54.1	MSTRG.4959.3	Osclob_v00_mik.OX382154.1G54	7111	1594	6027	13146	26438	0	198	11628	18025	6969.5	11257.8	MALE	4092441	#N/A
OX382154.1	MSTRG.4959	Osclob_v00_mik.OX382154.1G54.1	MSTRG.4959.4	Osclob_v00_mik.OX382154.1G54	209	1358	1861	0	5466	19733	21256	824	6795	857	10814.8	MALE	4092441	#N/A
OX382154.1	MSTRG.4959	Osclob_v00_mik.OX382154.1G54.1	MSTRG.4959.5	Osclob_v00_mik.OX382154.1G54	189	940	1294	0	0	0	0	638	5050	605.75	1137.6	MALE	4092441	#N/A
OX382154.1	MSTRG.4959	Osclob_v00_mik.OX382154.1G54.1	MSTRG.4959.6	Osclob_v00_mik.OX382154.1G54	266	1305	720	302	0	230	0	767	3980	648.25	995.4	MALE	4092441	#N/A
OX382154.1	MSTRG.4959	Osclob_v00_mik.OX382154.1G54.1	MSTRG.4959.10	Osclob_v00_mik.OX382154.1G54	352	192	55	233	89	297	28	641	60	208	223	MALE	4092441	#N/A
OX382154.1	MSTRG.4959	Osclob_v00_mik.OX382154.1G54.1	MSTRG.4959.11	Osclob_v00_mik.OX382154.1G54	11	10	63	0	40	161	0	45	98	21	68.8	MALE	4092441	#N/A
OX382154.1	MSTRG.4975	Osclob_v00_mik.OX382154.1G79.1	MSTRG.4975.1	Osclob_v00_mik.OX382154.1G79	5432	12813	10289	19934	24042	22212	19581	13214	7419	12117	17293.6	MALE	2403263	FRAS1_HUMANExtracellular matrix organizing protein FRAS1 OS=Homo sapiens OX=9606 GN=FRAS1 PE=1 SV=2
OX382154.1	MSTRG.4975	Osclob_v00_mik.OX382154.1G79.1	MSTRG.4975.3	Osclob_v00_mik.OX382154.1G79	8608	350	0	82	0	0	1	0	18809	2260	3762	MALE	2403263	FRAS1_HUMANExtracellular matrix organizing protein FRAS1 OS=Homo sapiens OX=9606 GN=FRAS1 PE=1 SV=2
OX382154.1	MSTRG.4975	Osclob_v00_mik.OX382154.1G79.1	MSTRG.4975.4	Osclob_v00_mik.OX382154.1G79	2507	2853	12	0	153	62	82	14630	1310	1343	3247.4	MALE	2403263	FRAS1_HUMANExtracellular matrix organizing protein FRAS1 OS=Homo sapiens OX=9606 GN=FRAS1 PE=1 SV=2
OX382154.1	MSTRG.5033	Osclob_v00_mik.OX382154.1G73.1	MSTRG.5033.1	Osclob_v00_mik.OX382154.1G73	5135	2619	4264	4761	8979	6422	4993	9076	9336	4194.75	7761.2	MALE	#N/A	#N/A
OX382154.1	MSTRG.5033	Osclob_v00_mik.OX382154.1G73.1	MSTRG.5033.2	Osclob_v00_mik.OX382154.1G73	5	36	16	2	2	17	11	10	2	14.75	8.4	MALE	#N/A	#N/A
OX382154.1	MSTRG.5033	Osclob_v00_mik.OX382154.1G73.1	MSTRG.5033.4	Osclob_v00_mik.OX382154.1G73	0	765	0	0	5	0	0	0	4	191.25	1.8	MALE	#N/A	#N/A
OX382154.1	MSTRG.5041	Osclob_v00_mik.OX382154.1G100.1	MSTRG.5041.1	Osclob_v00_mik.OX382154.1G100	0	0	13	0	12	0	7	1	6	3.25	5.2	MALE	2461098	TPST1_DANREProtein-tyrosine sulfotransferase 1 OS=Danio rerio OX=7955 GN=tpst1 PE=2 SV=2
OX382154.1	MSTRG.5041	Osclob_v00_mik.OX382154.1G100.1	MSTRG.5041.2	Osclob_v00_mik.OX382154.1G100	313	261	2	511	663	263	519	571	455	271.75	494.2	MALE	2461098	TPST1_DANREProtein-tyrosine sulfotransferase 1 OS=Danio rerio OX=7955 GN=tpst1 PE=2 SV=2
OX382154.1	MSTRG.5041	Osclob_v00_mik.OX382154.1G100.1	MSTRG.5041.3	Osclob_v00_mik.OX382154.1G100	0	0	0	0	0	0	28	0	0	0	5.6	MALE	2461098	TPST1_DANREProtein-tyrosine sulfotransferase 1 OS=Danio rerio OX=7955 GN=tpst1 PE=2 SV=2
OX382154.1	MSTRG.5115	Osclob_v00_mik.OX382154.1G202.1	MSTRG.5115.1	Osclob_v00_mik.OX382154.1G202	28	172	231	220	3344	37	4	2550	1123	162.75	1411.6	MALE	3791035	CENPJ_MOUSECentromere protein J OS=Mus musculus OX=10090 GN=Cenpj PE=2 SV=2
OX382154.1	MSTRG.5115	Osclob_v00_mik.OX382154.1G202.1	MSTRG.5115.2	Osclob_v00_mik.OX382154.1G202	0	0	0	0	0	0	0	927	0	0	185.4	MALE	3791035	CENPJ_MOUSECentromere protein J OS=Mus musculus OX=10090 GN=Cenpj PE=2 SV=2
OX382154.1	MSTRG.5115	Osclob_v00_mik.OX382154.1G202.1	MSTRG.5115.4	Osclob_v00_mik.OX382154.1G202	5493	3107	7426	5207	12571	7061	5980	8274	8942	5308.25	8565.6	MALE	3791035	CENPJ_MOUSECentromere protein J OS=Mus musculus OX=10090 GN=Cenpj PE=2 SV=2
OX382154.1	MSTRG.5115	Osclob_v00_mik.OX382154.1G202.1	MSTRG.5115.7	Osclob_v00_mik.OX382154.1G202	2	0	5	0	206	0	0	18	0	1.75	44.8	MALE	3791035	CENPJ_MOUSECentromere protein J OS=Mus musculus OX=10090 GN=Cenpj PE=2 SV=2
OX382154.1	MSTRG.5142	Osclob_v00_mik.OX382154.1G230.1	MSTRG.5142.1	Osclob_v00_mik.OX382154.1G230	668	201	358	355	2289	618	622	1807	661	395.5	1199.4	MALE	2288441	-
OX382154.1	MSTRG.5145	Osclob_v00_mik.OX382154.1G231.1	MSTRG.5145.1	Osclob_v00_mik.OX382154.1G231	1673	1466	778	1490	3768	1422	2688	2986	1640	1351.75	2500.8	MALE	#N/A	#N/A
OX382154.1	MSTRG.5189	Osclob_v00_mik.OX382154.1G280.1	MSTRG.5189.2	Osclob_v00_mik.OX382154.1G280	9342	4377	4776	2555	64376	8511	5098	15866	27322	5262.5	24234.6	MALE	#N/A	#N/A
OX382154.1	MSTRG.5223	Osclob_v00_mik.OX382154.1G331.1	MSTRG.5223.1	Osclob_v00_mik.OX382154.1G331	14264	5107	4648	6968	13895	7347	4078	14593	25493	7746.75	13081.2	MALE	#N/A	#N/A
OX382154.1	MSTRG.5257	Osclob_v00_mik.OX382154.1G348.1	MSTRG.5257.1	Osclob_v00_mik.OX382154.1G348	15049	2054	14	0	0	29232	0	0	133	4279.25	5873	MALE	#N/A	#N/A
OX382154.1	MSTRG.5257	Osclob_v00_mik.OX382154.1G348.1	MSTRG.5257.2	Osclob_v00_mik.OX382154.1G348	150	0	10976	10365	16565	399	12922	10940	26745	5372.75	13514.2	MALE	#N/A	#N/A
OX382154.1	MSTRG.5257	Osclob_v00_mik.OX382154.1G348.1	MSTRG.5257.3	Osclob_v00_mik.OX382154.1G348	0	0	0	18	0	0	158	144	405	4.5	141.4	MALE	#N/A	#N/A
OX382154.1	MSTRG.5257	Osclob_v00_mik.OX382154.1G348.1	MSTRG.5257.4	Osclob_v00_mik.OX382154.1G348	0	0	0	0	0	0	0	13843	0	0	2768.6	MALE	#N/A	#N/A
OX382154.1	MSTRG.5257	Osclob_v00_mik.OX382154.1G349.1	MSTRG.5257.1	Osclob_v00_mik.OX382154.1G349	15049	2054	14	0	0	29232	0	0	133	4279.25	5873	MALE	1376246	ABCC9_RATATP-binding cassette sub-family C member 9 OS=Rattus norvegicus OX=10116 GN=Abcc9 PE=1 SV=1
OX382154.1	MSTRG.5257	Osclob_v00_mik.OX382154.1G349.1	MSTRG.5257.2	Osclob_v00_mik.OX382154.1G349	150	0	10976	10365	16565	399	12922	10940	26745	5372.75	13514.2	MALE	1376246	ABCC9_RATATP-binding cassette sub-family C member 9 OS=Rattus norvegicus OX=10116 GN=Abcc9 PE=1 SV=1
OX382154.1	MSTRG.5257	Osclob_v00_mik.OX382154.1G349.1	MSTRG.5257.3	Osclob_v00_mik.OX382154.1G349	0	0	0	18	0	0	158	144	405	4.5	141.4	MALE	1376246	ABCC9_RATATP-binding cassette sub-family C member 9 OS=Rattus norvegicus OX=10116 GN=Abcc9 PE=1 SV=1
OX382154.1	MSTRG.5257	Osclob_v00_mik.OX382154.1G349.1	MSTRG.5257.4	Osclob_v00_mik.OX382154.1G349	0	0	0	0	0	0	0	13843	0	0	2768.6	MALE	1376246	ABCC9_RATATP-binding cassette sub-family C member 9 OS=Rattus norvegicus OX=10116 GN=Abcc9 PE=1 SV=1
OX382154.1	MSTRG.5257	Osclob_v00_mik.OX382154.1G349.1	MSTRG.5257.7	Osclob_v00_mik.OX382154.1G349	384	7117	7081	7505	21004	283	0	7295	10457	5521.75	7807.8	MALE	1376246	ABCC9_RATATP-binding cassette sub-family C member 9 OS=Rattus norvegicus OX=10116 GN=Abcc9 PE=1 SV=1
OX382154.1	MSTRG.5334	Osclob_v00_mik.OX382154.1G444.1	MSTRG.5334.1	Osclob_v00_mik.OX382154.1G444	15639	6408	12205	12950	33677	23473	13032	25621	19757	11800.5	23112	MALE	#N/A	#N/A
OX382154.1	MSTRG.5334	Osclob_v00_mik.OX382154.1G444.1	MSTRG.5334.2	Osclob_v00_mik.OX382154.1G444	14	0	0	0	0	0	0	0	11	3.5	2.2	MALE	#N/A	#N/A
OX382154.1	MSTRG.5334	Osclob_v00_mik.OX382154.1G444.1	MSTRG.5334.4	Osclob_v00_mik.OX382154.1G444	1	2	35	1	75	0	176	77	0	9.75	65.6	MALE	#N/A	#N/A
OX382154.1	MSTRG.5334	Osclob_v00_mik.OX382154.1G444.1	MSTRG.5334.5	Osclob_v00_mik.OX382154.1G444	0	0	17	0	0	0	0	80	0	4.25	16	MALE	#N/A	#N/A
OX382154.1	MSTRG.5334	Osclob_v00_mik.OX382154.1G444.1	MSTRG.5334.6	Osclob_v00_mik.OX382154.1G444	4	15	0	0	5	0	0	3	5	4.75	2.6	MALE	#N/A	#N/A
OX382154.1	MSTRG.5405	Osclob_v00_mik.OX382154.1G535.1	MSTRG.5405.1	Osclob_v00_mik.OX382154.1G535	5556	3624	27825	8224	25791	18036	16879	24708	10450	11307.2	19172.8	MALE	#N/A	#N/A
OX382154.1	MSTRG.5419	Osclob_v00_mik.OX382154.1G532.1	MSTRG.5419.1	Osclob_v00_mik.OX382154.1G532	890	1763	1133	2404	5182	647	1519	5481	3343	1547.5	3234.4	MALE	#N/A	#N/A
OX382154.1	MSTRG.5433	Osclob_v00_mik.OX382154.1G554.1	MSTRG.5433.1	Osclob_v00_mik.OX382154.1G554	2	0	386	1	5597	81	181	248	220	97.25	1265.4	MALE	#N/A	#N/A
OX382154.1	MSTRG.5433	Osclob_v00_mik.OX382154.1G554.1	MSTRG.5433.2	Osclob_v00_mik.OX382154.1G554	53	0	0	4883	0	5	0	9	0	1234	2.8	MALE	#N/A	#N/A
OX382154.1	MSTRG.5433	Osclob_v00_mik.OX382154.1G554.1	MSTRG.5433.3	Osclob_v00_mik.OX382154.1G554	799	176	56	1678	1	1974	0	2773	3794	677.25	1708.4	MALE	#N/A	#N/A
OX382154.1	MSTRG.5433	Osclob_v00_mik.OX382154.1G554.1	MSTRG.5433.4	Osclob_v00_mik.OX382154.1G554	140	337	322	470	177	925	347	357	356	317.25	432.4	MALE	#N/A	#N/A
OX382154.1	MSTRG.5433	Osclob_v00_mik.OX382154.1G554.1	MSTRG.5433.6	Osclob_v00_mik.OX382154.1G554	0	0	43	58	0	36	0	59	15	25.25	22	MALE	#N/A	#N/A
OX382154.1	MSTRG.5433	Osclob_v00_mik.OX382154.1G554.1	MSTRG.5433.8	Osclob_v00_mik.OX382154.1G554	142	87	0	1911	1153	1743	32	2104	357	535	1077.8	MALE	#N/A	#N/A
OX382154.1	MSTRG.5433	Osclob_v00_mik.OX382154.1G554.1	MSTRG.5433.9	Osclob_v00_mik.OX382154.1G554	0	0	0	0	30	51	0	11	380	0	94.4	MALE	#N/A	#N/A
OX382154.1	MSTRG.5433	Osclob_v00_mik.OX382154.1G554.1	MSTRG.5433.10	Osclob_v00_mik.OX382154.1G554	222	36	0	467	1184	143	455	2295	347	181.25	884.8	MALE	#N/A	#N/A
OX382154.1	MSTRG.5433	Osclob_v00_mik.OX382154.1G555.1	MSTRG.5433.1	Osclob_v00_mik.OX382154.1G555	2	0	386	1	5597	81	181	248	220	97.25	1265.4	MALE	#N/A	#N/A
OX382154.1	MSTRG.5433	Osclob_v00_mik.OX382154.1G555.1	MSTRG.5433.2	Osclob_v00_mik.OX382154.1G555	53	0	0	4883	0	5	0	9	0	1234	2.8	MALE	#N/A	#N/A
OX382154.1	MSTRG.5433	Osclob_v00_mik.OX382154.1G555.1	MSTRG.5433.3	Osclob_v00_mik.OX382154.1G555	799	176	56	1678	1	1974	0	2773	3794	677.25	1708.4	MALE	#N/A	#N/A
OX382154.1	MSTRG.5433	Osclob_v00_mik.OX382154.1G555.1	MSTRG.5433.4	Osclob_v00_mik.OX382154.1G555	140	337	322	470	177	925	347	357	356	317.25	432.4	MALE	#N/A	#N/A
OX382154.1	MSTRG.5433	Osclob_v00_mik.OX382154.1G555.1	MSTRG.5433.6	Osclob_v00_mik.OX382154.1G555	0	0	43	58	0	36	0	59	15	25.25	22	MALE	#N/A	#N/A
OX382154.1	MSTRG.5433	Osclob_v00_mik.OX382154.1G555.1	MSTRG.5433.8	Osclob_v00_mik.OX382154.1G555	142	87	0	1911	1153	1743	32	2104	357	535	1077.8	MALE	#N/A	#N/A
OX382154.1	MSTRG.5433	Osclob_v00_mik.OX382154.1G555.1	MSTRG.5433.9	Osclob_v00_mik.OX382154.1G555	0	0	0	0	30	51	0	11	380	0	94.4	MALE	#N/A	#N/A
OX382154.1	MSTRG.5433	Osclob_v00_mik.OX382154.1G555.1	MSTRG.5433.10	Osclob_v00_mik.OX382154.1G555	222	36	0	467	1184	143	455	2295	347	181.25	884.8	MALE	#N/A	#N/A
OX382154.1	MSTRG.5433	Osclob_v00_mik.OX382154.1G555.1	MSTRG.5433.11	Osclob_v00_mik.OX382154.1G555	0	0	0	0	331	0	0	1133	1258	0	544.4	MALE	#N/A	#N/A
OX382154.1	MSTRG.5433	Osclob_v00_mik.OX382154.1G555.1	MSTRG.5433.12	Osclob_v00_mik.OX382154.1G555	0	0	0	31	47	53	0	51	0	7.75	30.2	MALE	#N/A	#N/A
OX382154.1	MSTRG.5433	Osclob_v00_mik.OX382154.1G555.1	MSTRG.5433.13	Osclob_v00_mik.OX382154.1G555	1	1	0	46	19	42	0	27	0	12	17.6	MALE	#N/A	#N/A
OX382154.1	MSTRG.5433	Osclob_v00_mik.OX382154.1G555.1	MSTRG.5433.14	Osclob_v00_mik.OX382154.1G555	387	140	86	2	61	57	259	171	167	153.75	143	MALE	#N/A	#N/A
OX382154.1	MSTRG.5433	Osclob_v00_mik.OX382154.1G556.2	MSTRG.5433.1	Osclob_v00_mik.OX382154.1G556	2	0	386	1	5597	81	181	248	220	97.25	1265.4	MALE	#N/A	#N/A
OX382154.1	MSTRG.5433	Osclob_v00_mik.OX382154.1G556.2	MSTRG.5433.2	Osclob_v00_mik.OX382154.1G556	53	0	0	4883	0	5	0	9	0	1234	2.8	MALE	#N/A	#N/A
OX382154.1	MSTRG.5433	Osclob_v00_mik.OX382154.1G556.2	MSTRG.5433.3	Osclob_v00_mik.OX382154.1G556	799	176	56	1678	1	1974	0	2773	3794	677.25	1708.4	MALE	#N/A	#N/A
OX382154.1	MSTRG.5433	Osclob_v00_mik.OX382154.1G556.2	MSTRG.5433.4	Osclob_v00_mik.OX382154.1G556	140	337	322	470	177	925	347	357	356	317.25	432.4	MALE	#N/A	#N/A
OX382154.1	MSTRG.5433	Osclob_v00_mik.OX382154.1G556.2	MSTRG.5433.6	Osclob_v00_mik.OX382154.1G556	0	0	43	58	0	36	0	59	15	25.25	22	MALE	#N/A	#N/A
OX382154.1	MSTRG.5518	Osclob_v00_mik.OX382154.1G791.1	MSTRG.5518.1	Osclob_v00_mik.OX382154.1G791	498	63	147	405	496	243	75	83	165	278.25	212.4	MALE	1569047	NTRK2_MOUSEBDNF/NT-3 growth factors receptor OS=Mus musculus OX=10090 GN=Ntrk2 PE=1 SV=1
OX382154.1	MSTRG.5518	Osclob_v00_mik.OX382154.1G791.1	MSTRG.5518.3	Osclob_v00_mik.OX382154.1G791	59	7	11	16	19	0	0	30	14	23.25	12.6	MALE	1569047	NTRK2_MOUSEBDNF/NT-3 growth factors receptor OS=Mus musculus OX=10090 GN=Ntrk2 PE=1 SV=1
OX382154.1	MSTRG.5522	Osclob_v00_mik.OX382154.1G796.1	MSTRG.5522.1	Osclob_v00_mik.OX382154.1G796	189	60	65	25	190	0	138	419	213	84.75	192	MALE	2300709	TORSO_BOMMOTyrosine-protein kinase receptor torso OS=Bombyx mori OX=7091 GN=tor PE=1 SV=1
OX382154.1	MSTRG.5522	Osclob_v00_mik.OX382154.1G796.1	MSTRG.5522.3	Osclob_v00_mik.OX382154.1G796	6	0	33	0	79	51	0	0	267	9.75	79.4	MALE	2300709	TORSO_BOMMOTyrosine-protein kinase receptor torso OS=Bombyx mori OX=7091 GN=tor PE=1 SV=1
OX382154.1	MSTRG.5522	Osclob_v00_mik.OX382154.1G796.1	MSTRG.5522.4	Osclob_v00_mik.OX382154.1G796	3443	2366	10407	532	4670	335	4201	2795	2999	4187	3000	MALE	2300709	TORSO_BOMMOTyrosine-protein kinase receptor torso OS=Bombyx mori OX=7091 GN=tor PE=1 SV=1
OX382154.1	MSTRG.5522	Osclob_v00_mik.OX382154.1G796.1	MSTRG.5522.6	Osclob_v00_mik.OX382154.1G796	0	0	0	0	1299	1	85	1571	87	0	608.6	MALE	2300709	TORSO_BOMMOTyrosine-protein kinase receptor torso OS=Bombyx mori OX=7091 GN=tor PE=1 SV=1
OX382154.1	MSTRG.5522	Osclob_v00_mik.OX382154.1G796.1	MSTRG.5522.7	Osclob_v00_mik.OX382154.1G796	98	3	250	14	1959	2321	160	286	590	91.25	1063.2	MALE	2300709	TORSO_BOMMOTyrosine-protein kinase receptor torso OS=Bombyx mori OX=7091 GN=tor PE=1 SV=1
OX382154.1	MSTRG.5522	Osclob_v00_mik.OX382154.1G796.1	MSTRG.5522.8	Osclob_v00_mik.OX382154.1G796	4430	1804	1440	9076	18224	57284	3014	9571	364	4187.5	17691.4	MALE	2300709	TORSO_BOMMOTyrosine-protein kinase receptor torso OS=Bombyx mori OX=7091 GN=tor PE=1 SV=1
OX382154.1	MSTRG.5522	Osclob_v00_mik.OX382154.1G796.1	MSTRG.5522.9	Osclob_v00_mik.OX382154.1G796	308	49	566	68	57	4	194	708	16	247.75	195.8	MALE	2300709	TORSO_BOMMOTyrosine-protein kinase receptor torso OS=Bombyx mori OX=7091 GN=tor PE=1 SV=1
OX382154.1	MSTRG.5522	Osclob_v00_mik.OX382154.1G796.1	MSTRG.5522.10	Osclob_v00_mik.OX382154.1G796	0	0	0	0	53	0	0	129	852	0	206.8	MALE	2300709	TORSO_BOMMOTyrosine-protein kinase receptor torso OS=Bombyx mori OX=7091 GN=tor PE=1 SV=1
OX382154.1	MSTRG.5522	Osclob_v00_mik.OX382154.1G796.1	MSTRG.5522.11	Osclob_v00_mik.OX382154.1G796	1	0	1	1	0	0	0	0	829	0.75	165.8	MALE	2300709	TORSO_BOMMOTyrosine-protein kinase receptor torso OS=Bombyx mori OX=7091 GN=tor PE=1 SV=1
OX382154.1	MSTRG.5522	Osclob_v00_mik.OX382154.1G796.1	MSTRG.5522.12	Osclob_v00_mik.OX382154.1G796	99	1334	4628	700	1081	378	5360	4165	7586	1690.25	3714	MALE	2300709	TORSO_BOMMOTyrosine-protein kinase receptor torso OS=Bombyx mori OX=7091 GN=tor PE=1 SV=1
OX382154.1	MSTRG.5522	Osclob_v00_mik.OX382154.1G796.1	MSTRG.5522.14	Osclob_v00_mik.OX382154.1G796	0	108	474	23	199	390	159	923	5631	151.25	1460.4	MALE	2300709	TORSO_BOMMOTyrosine-protein kinase receptor torso OS=Bombyx mori OX=7091 GN=tor PE=1 SV=1
OX382154.1	MSTRG.5522	Osclob_v00_mik.OX382154.1G796.1	MSTRG.5522.15	Osclob_v00_mik.OX382154.1G796	44	0	281	0	0	0	0	1303	3969	81.25	1054.4	MALE	2300709	TORSO_BOMMOTyrosine-protein kinase receptor torso OS=Bombyx mori OX=7091 GN=tor PE=1 SV=1
OX382154.1	MSTRG.5522	Osclob_v00_mik.OX382154.1G802.1	MSTRG.5522.1	Osclob_v00_mik.OX382154.1G802	189	60	65	25	190	0	138	419	213	84.75	192	MALE	2145551	-
OX382154.1	MSTRG.5522	Osclob_v00_mik.OX382154.1G802.1	MSTRG.5522.3	Osclob_v00_mik.OX382154.1G802	6	0	33	0	79	51	0	0	267	9.75	79.4	MALE	2145551	-
OX382154.1	MSTRG.5563	Osclob_v00_mik.OX382154.1G845.1	MSTRG.5563.1	Osclob_v00_mik.OX382154.1G845	3	4	23	4	24	70	13	39	49	8.5	39	MALE	#N/A	#N/A
OX382154.1	MSTRG.5563	Osclob_v00_mik.OX382154.1G845.1	MSTRG.5563.3	Osclob_v00_mik.OX382154.1G845	0	24	96	0	14	114	3	43	103	30	55.4	MALE	#N/A	#N/A
OX382154.1	MSTRG.5566	Osclob_v00_mik.OX382154.1G847.1	MSTRG.5566.1	Osclob_v00_mik.OX382154.1G847	0	0	50	0	871	0	68	364	1677	12.5	596	MALE	#N/A	#N/A
OX382154.1	MSTRG.5566	Osclob_v00_mik.OX382154.1G847.1	MSTRG.5566.2	Osclob_v00_mik.OX382154.1G847	1	7	6	1	25	1931	16	4	76	3.75	410.4	MALE	#N/A	#N/A
OX382154.1	MSTRG.5570	Osclob_v00_mik.OX382154.1G851.1	MSTRG.5570.1	Osclob_v00_mik.OX382154.1G851	1625	1478	2600	0	925	10305	0	3887	8623	1425.75	4748	MALE	#N/A	#N/A
OX382154.1	MSTRG.5570	Osclob_v00_mik.OX382154.1G851.1	MSTRG.5570.2	Osclob_v00_mik.OX382154.1G851	0	0	2302	577	0	0	532	0	0	719.75	106.4	MALE	#N/A	#N/A
OX382154.1	MSTRG.5572	Osclob_v00_mik.OX382154.1G852.1	MSTRG.5572.1	Osclob_v00_mik.OX382154.1G852	15	16	12	18	37	153	99	11	19	15.25	63.8	MALE	1602696	-
OX382154.1	MSTRG.5572	Osclob_v00_mik.OX382154.1G852.1	MSTRG.5572.2	Osclob_v00_mik.OX382154.1G852	0	35	18	31	155	228	55	9	15	21	92.4	MALE	1602696	-
OX382154.1	MSTRG.5608	Osclob_v00_mik.OX382154.1G678.1	MSTRG.5608.1	Osclob_v00_mik.OX382154.1G678	354	670	1010	0	3801	1552	279	4540	777	508.5	2189.8	MALE	2308743	DAPK1_HUMANDeath-associated protein kinase 1 OS=Homo sapiens OX=9606 GN=DAPK1 PE=1 SV=6
OX382154.1	MSTRG.5608	Osclob_v00_mik.OX382154.1G678.1	MSTRG.5608.2	Osclob_v00_mik.OX382154.1G678	1023	1462	2224	2135	4508	1850	1370	3931	1690	1711	2669.8	MALE	2308743	DAPK1_HUMANDeath-associated protein kinase 1 OS=Homo sapiens OX=9606 GN=DAPK1 PE=1 SV=6
OX382154.1	MSTRG.5608	Osclob_v00_mik.OX382154.1G678.1	MSTRG.5608.3	Osclob_v00_mik.OX382154.1G678	11	146	309	102	1649	0	25	1398	442	142	702.8	MALE	2308743	DAPK1_HUMANDeath-associated protein kinase 1 OS=Homo sapiens OX=9606 GN=DAPK1 PE=1 SV=6
OX382154.1	MSTRG.5608	Osclob_v00_mik.OX382154.1G678.1	MSTRG.5608.7	Osclob_v00_mik.OX382154.1G678	0	0	0	12	0	123	159	0	0	3	56.4	MALE	2308743	DAPK1_HUMANDeath-associated protein kinase 1 OS=Homo sapiens OX=9606 GN=DAPK1 PE=1 SV=6
OX382154.1	MSTRG.5608	Osclob_v00_mik.OX382154.1G678.1	MSTRG.5608.9	Osclob_v00_mik.OX382154.1G678	0	0	0	0	67	354	521	0	323	0	253	MALE	2308743	DAPK1_HUMANDeath-associated protein kinase 1 OS=Homo sapiens OX=9606 GN=DAPK1 PE=1 SV=6
OX382154.1	MSTRG.5615	Osclob_v00_mik.OX382154.1G691.1	MSTRG.5615.1	Osclob_v00_mik.OX382154.1G691	287	755	127	8571	535	8728	3808	346	362	2435	2755.8	MALE	#N/A	#N/A
OX382154.1	MSTRG.5615	Osclob_v00_mik.OX382154.1G691.1	MSTRG.5615.3	Osclob_v00_mik.OX382154.1G691	140	55	190	11	98	152	19	223	159	99	130.2	MALE	#N/A	#N/A
OX382154.1	MSTRG.5615	Osclob_v00_mik.OX382154.1G691.1	MSTRG.5615.5	Osclob_v00_mik.OX382154.1G691	7545	458	7203	2494	827	1213	2995	2459	669	4425	1632.6	MALE	#N/A	#N/A
OX382154.1	MSTRG.5615	Osclob_v00_mik.OX382154.1G691.1	MSTRG.5615.7	Osclob_v00_mik.OX382154.1G691	242	0	315	331	0	0	0	561	150	222	142.2	MALE	#N/A	#N/A
OX382154.1	MSTRG.5615	Osclob_v00_mik.OX382154.1G691.1	MSTRG.5615.8	Osclob_v00_mik.OX382154.1G691	2166	0	17685	0	0	331	0	13914	7691	4962.75	4387.2	MALE	#N/A	#N/A
OX382154.1	MSTRG.5615	Osclob_v00_mik.OX382154.1G691.1	MSTRG.5615.9	Osclob_v00_mik.OX382154.1G691	5346	3174	1847	0	20238	0	1097	19996	8007	2591.75	9867.6	MALE	#N/A	#N/A
OX382154.1	MSTRG.5615	Osclob_v00_mik.OX382154.1G691.1	MSTRG.5615.10	Osclob_v00_mik.OX382154.1G691	0	0	0	0	10713	0	0	6565	0	0	3455.6	MALE	#N/A	#N/A
OX382154.1	MSTRG.5615	Osclob_v00_mik.OX382154.1G760.1	MSTRG.5615.1	Osclob_v00_mik.OX382154.1G760	287	755	127	8571	535	8728	3808	346	362	2435	2755.8	MALE	#N/A	#N/A
OX382154.1	MSTRG.5615	Osclob_v00_mik.OX382154.1G760.1	MSTRG.5615.3	Osclob_v00_mik.OX382154.1G760	140	55	190	11	98	152	19	223	159	99	130.2	MALE	#N/A	#N/A
OX382154.1	MSTRG.5615	Osclob_v00_mik.OX382154.1G760.1	MSTRG.5615.5	Osclob_v00_mik.OX382154.1G760	7545	458	7203	2494	827	1213	2995	2459	669	4425	1632.6	MALE	#N/A	#N/A
OX382154.1	MSTRG.5615	Osclob_v00_mik.OX382154.1G760.1	MSTRG.5615.7	Osclob_v00_mik.OX382154.1G760	242	0	315	331	0	0	0	561	150	222	142.2	MALE	#N/A	#N/A
OX382154.1	MSTRG.5615	Osclob_v00_mik.OX382154.1G760.1	MSTRG.5615.8	Osclob_v00_mik.OX382154.1G760	2166	0	17685	0	0	331	0	13914	7691	4962.75	4387.2	MALE	#N/A	#N/A
OX382154.1	MSTRG.5615	Osclob_v00_mik.OX382154.1G760.1	MSTRG.5615.9	Osclob_v00_mik.OX382154.1G760	5346	3174	1847	0	20238	0	1097	19996	8007	2591.75	9867.6	MALE	#N/A	#N/A
OX382154.1	MSTRG.5615	Osclob_v00_mik.OX382154.1G760.1	MSTRG.5615.10	Osclob_v00_mik.OX382154.1G760	0	0	0	0	10713	0	0	6565	0	0	3455.6	MALE	#N/A	#N/A
OX382154.1	MSTRG.5615	Osclob_v00_mik.OX382154.1G760.1	MSTRG.5615.11	Osclob_v00_mik.OX382154.1G760	10	2	237	2468	10335	7357	769	643	8	679.25	3822.4	MALE	#N/A	#N/A
OX382154.1	MSTRG.5625	Osclob_v00_mik.OX382154.1G704.1	MSTRG.5625.1	Osclob_v00_mik.OX382154.1G704	876	54	2470	1262	1637	1083	449	3850	3420	1165.5	2087.8	MALE	#N/A	#N/A
OX382154.1	MSTRG.5625	Osclob_v00_mik.OX382154.1G704.1	MSTRG.5625.2	Osclob_v00_mik.OX382154.1G704	674	641	312	936	937	5164	34	770	1581	640.75	1697.2	MALE	#N/A	#N/A
OX382154.1	MSTRG.5625	Osclob_v00_mik.OX382154.1G704.1	MSTRG.5625.3	Osclob_v00_mik.OX382154.1G704	0	240	73	0	30	522	0	31	251	78.25	166.8	MALE	#N/A	#N/A
OX382154.1	MSTRG.5625	Osclob_v00_mik.OX382154.1G704.1	MSTRG.5625.4	Osclob_v00_mik.OX382154.1G704	1126	1290	585	481	2664	1772	1503	976	1102	870.5	1603.4	MALE	#N/A	#N/A
OX382154.1	MSTRG.5625	Osclob_v00_mik.OX382154.1G704.1	MSTRG.5625.6	Osclob_v00_mik.OX382154.1G704	55	0	51	0	53	56	0	70	43	26.5	44.4	MALE	#N/A	#N/A
OX382154.1	MSTRG.5645	Osclob_v00_mik.OX382154.1G723.1	MSTRG.5645.1	Osclob_v00_mik.OX382154.1G723	7120	712	3	7171	1	104	0	3	15	3751.5	24.6	MALE	#N/A	#N/A
OX382154.1	MSTRG.5645	Osclob_v00_mik.OX382154.1G723.1	MSTRG.5645.2	Osclob_v00_mik.OX382154.1G723	1029	57	0	3363	0	0	0	0	0	1112.25	0	MALE	#N/A	#N/A
OX382154.1	MSTRG.5670	Osclob_v00_mik.OX382154.1G744.1	MSTRG.5670.1	Osclob_v00_mik.OX382154.1G744	391	202	1031	135	590	0	169	826	5	439.75	318	MALE	#N/A	#N/A
OX382154.1	MSTRG.5670	Osclob_v00_mik.OX382154.1G744.1	MSTRG.5670.2	Osclob_v00_mik.OX382154.1G744	34	0	38	75	288	0	246	545	575	36.75	330.8	MALE	#N/A	#N/A
OX382154.1	MSTRG.5670	Osclob_v00_mik.OX382154.1G744.1	MSTRG.5670.3	Osclob_v00_mik.OX382154.1G744	0	22	0	0	0	1085	0	0	443	5.5	305.6	MALE	#N/A	#N/A
OX382154.1	MSTRG.5670	Osclob_v00_mik.OX382154.1G744.1	MSTRG.5670.4	Osclob_v00_mik.OX382154.1G744	121	47	8	3	353	831	208	309	34	44.75	347	MALE	#N/A	#N/A
OX382154.1	MSTRG.5670	Osclob_v00_mik.OX382154.1G744.1	MSTRG.5670.5	Osclob_v00_mik.OX382154.1G744	0	0	0	0	574	0	0	1370	1369	0	662.6	MALE	#N/A	#N/A
OX382154.1	MSTRG.5670	Osclob_v00_mik.OX382154.1G744.1	MSTRG.5670.6	Osclob_v00_mik.OX382154.1G744	0	0	0	0	2164	4547	0	618	296	0	1525	MALE	#N/A	#N/A
OX382154.1	MSTRG.5670	Osclob_v00_mik.OX382154.1G744.1	MSTRG.5670.7	Osclob_v00_mik.OX382154.1G744	0	0	0	0	10	0	27	0	6	0	8.6	MALE	#N/A	#N/A
OX382154.1	MSTRG.5670	Osclob_v00_mik.OX382154.1G744.1	MSTRG.5670.9	Osclob_v00_mik.OX382154.1G744	28	0	0	0	81	8	50	144	25	7	61.6	MALE	#N/A	#N/A
OX382154.1	MSTRG.5672	Osclob_v00_mik.OX382154.1G751.1	MSTRG.5672.1	Osclob_v00_mik.OX382154.1G751	728	547	975	242	1856	416	1850	1634	568	623	1264.8	MALE	1622044	ERC6L_MOUSEDNA excision repair protein ERCC-6-like OS=Mus musculus OX=10090 GN=Ercc6l PE=1 SV=1
OX382155.1	MSTRG.5805	Osclob_v00_mik.OX382155.1G127.2	MSTRG.5805.1	Osclob_v00_mik.OX382155.1G127	0	9	14	0	45	76	599	118	0	5.75	167.6	MALE	#N/A	#N/A
OX382155.1	MSTRG.5805	Osclob_v00_mik.OX382155.1G127.2	MSTRG.5805.2	Osclob_v00_mik.OX382155.1G127	3	41	0	3	48	2	257	48	196	11.75	110.2	MALE	#N/A	#N/A
OX382155.1	MSTRG.5805	Osclob_v00_mik.OX382155.1G127.2	MSTRG.5805.3	Osclob_v00_mik.OX382155.1G127	407	0	0	223	0	0	0	0	0	157.5	0	MALE	#N/A	#N/A
OX382155.1	MSTRG.5805	Osclob_v00_mik.OX382155.1G127.2	MSTRG.5805.6	Osclob_v00_mik.OX382155.1G127	0	823	0	0	0	0	0	0	0	205.75	0	MALE	#N/A	#N/A
OX382155.1	MSTRG.5805	Osclob_v00_mik.OX382155.1G127.2	MSTRG.5805.10	Osclob_v00_mik.OX382155.1G127	51	13	82	0	10	14	24	0	45	36.5	18.6	MALE	#N/A	#N/A
OX382155.1	MSTRG.5833	Osclob_v00_mik.OX382155.1G160.2	MSTRG.5833.3	Osclob_v00_mik.OX382155.1G160	0	0	73	0	586	0	68	176	0	18.25	166	MALE	#N/A	#N/A
OX382155.1	MSTRG.5833	Osclob_v00_mik.OX382155.1G160.1	MSTRG.5833.3	Osclob_v00_mik.OX382155.1G160	0	0	73	0	586	0	68	176	0	18.25	166	MALE	1567258	#N/A
OX382155.1	MSTRG.5897	Osclob_v00_mik.OX382155.1G191.1	MSTRG.5897.1	Osclob_v00_mik.OX382155.1G191	93	84	225	51	867	254	387	681	39	113.25	445.6	MALE	2526968	TM145_XENLATransmembrane protein 145 OS=Xenopus laevis OX=8355 GN=tmem145 PE=2 SV=1
OX382155.1	MSTRG.5897	Osclob_v00_mik.OX382155.1G191.1	MSTRG.5897.2	Osclob_v00_mik.OX382155.1G191	0	0	4	0	34	0	0	1	0	1	7	MALE	2526968	TM145_XENLATransmembrane protein 145 OS=Xenopus laevis OX=8355 GN=tmem145 PE=2 SV=1
OX382155.1	MSTRG.5897	Osclob_v00_mik.OX382155.1G191.1	MSTRG.5897.5	Osclob_v00_mik.OX382155.1G191	222	1	298	14	382	6	49	164	122	133.75	144.6	MALE	2526968	TM145_XENLATransmembrane protein 145 OS=Xenopus laevis OX=8355 GN=tmem145 PE=2 SV=1
OX382155.1	MSTRG.5897	Osclob_v00_mik.OX382155.1G191.1	MSTRG.5897.6	Osclob_v00_mik.OX382155.1G191	460	247	153	242	26	3	66	51	36	275.5	36.4	MALE	2526968	TM145_XENLATransmembrane protein 145 OS=Xenopus laevis OX=8355 GN=tmem145 PE=2 SV=1
OX382155.1	MSTRG.5897	Osclob_v00_mik.OX382155.1G191.1	MSTRG.5897.7	Osclob_v00_mik.OX382155.1G191	0	5	0	0	714	0	0	569	293	1.25	315.2	MALE	2526968	TM145_XENLATransmembrane protein 145 OS=Xenopus laevis OX=8355 GN=tmem145 PE=2 SV=1
OX382155.1	MSTRG.5897	Osclob_v00_mik.OX382155.1G191.1	MSTRG.5897.8	Osclob_v00_mik.OX382155.1G191	0	3	43	0	343	215	6	24	0	11.5	117.6	MALE	2526968	TM145_XENLATransmembrane protein 145 OS=Xenopus laevis OX=8355 GN=tmem145 PE=2 SV=1
OX382155.1	MSTRG.5897	Osclob_v00_mik.OX382155.1G191.1	MSTRG.5897.9	Osclob_v00_mik.OX382155.1G191	0	0	0	0	0	536	0	0	0	0	107.2	MALE	2526968	TM145_XENLATransmembrane protein 145 OS=Xenopus laevis OX=8355 GN=tmem145 PE=2 SV=1
OX382155.1	MSTRG.5957	Osclob_v00_mik.OX382155.1G246.1	MSTRG.5957.1	Osclob_v00_mik.OX382155.1G246	467	211	284	1000	5775	1069	2541	2627	11	490.5	2404.6	MALE	#N/A	#N/A
OX382155.1	MSTRG.5957	Osclob_v00_mik.OX382155.1G246.1	MSTRG.5957.2	Osclob_v00_mik.OX382155.1G246	168	707	76	1168	877	0	0	1498	837	529.75	642.4	MALE	#N/A	#N/A
OX382155.1	MSTRG.5957	Osclob_v00_mik.OX382155.1G246.1	MSTRG.5957.3	Osclob_v00_mik.OX382155.1G246	420	1824	389	1307	59	833	824	520	278	985	502.8	MALE	#N/A	#N/A
OX382155.1	MSTRG.5957	Osclob_v00_mik.OX382155.1G246.1	MSTRG.5957.5	Osclob_v00_mik.OX382155.1G246	0	0	8	0	0	30	103	70	53	2	51.2	MALE	#N/A	#N/A
OX382155.1	MSTRG.6042	Osclob_v00_mik.OX382155.1G337.1	MSTRG.6042.1	Osclob_v00_mik.OX382155.1G337	12	41	8	30	28	0	192	105	1	22.75	65.2	MALE	2849624	HMCN2_MOUSEHemicentin-2 OS=Mus musculus OX=10090 GN=Hmcn2 PE=1 SV=1
OX382155.1	MSTRG.6042	Osclob_v00_mik.OX382155.1G337.1	MSTRG.6042.2	Osclob_v00_mik.OX382155.1G337	0	0	0	0	132	112	0	0	27	0	54.2	MALE	2849624	HMCN2_MOUSEHemicentin-2 OS=Mus musculus OX=10090 GN=Hmcn2 PE=1 SV=1
OX382155.1	MSTRG.6042	Osclob_v00_mik.OX382155.1G337.1	MSTRG.6042.4	Osclob_v00_mik.OX382155.1G337	357	170	386	295	548	375	300	312	151	302	337.2	MALE	2849624	HMCN2_MOUSEHemicentin-2 OS=Mus musculus OX=10090 GN=Hmcn2 PE=1 SV=1
OX382155.1	MSTRG.6042	Osclob_v00_mik.OX382155.1G337.1	MSTRG.6042.7	Osclob_v00_mik.OX382155.1G337	71	47	0	27	109	59	16	32	208	36.25	84.8	MALE	2849624	HMCN2_MOUSEHemicentin-2 OS=Mus musculus OX=10090 GN=Hmcn2 PE=1 SV=1
OX382155.1	MSTRG.6042	Osclob_v00_mik.OX382155.1G337.1	MSTRG.6042.8	Osclob_v00_mik.OX382155.1G337	4	17	49	1	21	3	3	15	4	17.75	9.2	MALE	2849624	HMCN2_MOUSEHemicentin-2 OS=Mus musculus OX=10090 GN=Hmcn2 PE=1 SV=1
OX382155.1	MSTRG.6042	Osclob_v00_mik.OX382155.1G337.1	MSTRG.6042.10	Osclob_v00_mik.OX382155.1G337	0	25	0	0	0	0	0	9	0	6.25	1.8	MALE	2849624	HMCN2_MOUSEHemicentin-2 OS=Mus musculus OX=10090 GN=Hmcn2 PE=1 SV=1
OX382156.1	MSTRG.6438	Osclob_v00_mik.OX382156.1G25.1	MSTRG.6438.1	Osclob_v00_mik.OX382156.1G25	436	1627	0	36	193	0	5	493	4198	524.75	977.8	MALE	2717422	PB1_CHICKProtein polybromo-1 OS=Gallus gallus OX=9031 GN=PBRM1 PE=1 SV=1
OX382156.1	MSTRG.6438	Osclob_v00_mik.OX382156.1G25.1	MSTRG.6438.2	Osclob_v00_mik.OX382156.1G25	93	246	5797	1	7257	744	2191	1889	441	1534.25	2504.4	MALE	2717422	PB1_CHICKProtein polybromo-1 OS=Gallus gallus OX=9031 GN=PBRM1 PE=1 SV=1
OX382156.1	MSTRG.6438	Osclob_v00_mik.OX382156.1G25.1	MSTRG.6438.5	Osclob_v00_mik.OX382156.1G25	50	94	0	0	15209	0	0	27345	0	36	8510.8	MALE	2717422	PB1_CHICKProtein polybromo-1 OS=Gallus gallus OX=9031 GN=PBRM1 PE=1 SV=1
OX382156.1	MSTRG.6438	Osclob_v00_mik.OX382156.1G25.1	MSTRG.6438.6	Osclob_v00_mik.OX382156.1G25	4008	48	36272	2753	17507	2101	10536	7178	889	10770.2	7642.2	MALE	2717422	PB1_CHICKProtein polybromo-1 OS=Gallus gallus OX=9031 GN=PBRM1 PE=1 SV=1
OX382156.1	MSTRG.6473	Osclob_v00_mik.OX382156.1G167.1	MSTRG.6473.1	Osclob_v00_mik.OX382156.1G167	1654	874	2392	1502	2997	1972	864	2989	2236	1605.5	2211.6	MALE	#N/A	#N/A
OX382156.1	MSTRG.6594	Osclob_v00_mik.OX382156.1G70.1	MSTRG.6594.1	Osclob_v00_mik.OX382156.1G70	527	866	1450	1300	4556	3292	1366	4016	3347	1035.75	3315.4	MALE	4005443	BROMI_DANREProtein broad-minded OS=Danio rerio OX=7955 GN=tbc1d32 PE=3 SV=2
OX382156.1	MSTRG.6594	Osclob_v00_mik.OX382156.1G70.1	MSTRG.6594.2	Osclob_v00_mik.OX382156.1G70	0	0	0	16	130	0	0	0	2971	4	620.2	MALE	4005443	BROMI_DANREProtein broad-minded OS=Danio rerio OX=7955 GN=tbc1d32 PE=3 SV=2
OX382156.1	MSTRG.6594	Osclob_v00_mik.OX382156.1G70.1	MSTRG.6594.3	Osclob_v00_mik.OX382156.1G70	463	0	0	0	0	0	0	0	0	115.75	0	MALE	4005443	BROMI_DANREProtein broad-minded OS=Danio rerio OX=7955 GN=tbc1d32 PE=3 SV=2
OX382156.1	MSTRG.6723	Osclob_v00_mik.OX382156.1G431.1	MSTRG.6723.1	Osclob_v00_mik.OX382156.1G431	411748	306974	213301	307070	7179	48883	14811	185901	89347	309773	69224.2	MALE	#N/A	#N/A
OX382156.1	MSTRG.6723	Osclob_v00_mik.OX382156.1G431.1	MSTRG.6723.2	Osclob_v00_mik.OX382156.1G431	314139	31220	45846	27803	427	8	195	77688	136965	104752	43056.6	MALE	#N/A	#N/A
OX382156.1	MSTRG.6723	Osclob_v00_mik.OX382156.1G431.1	MSTRG.6723.3	Osclob_v00_mik.OX382156.1G431	0	245825	0	0	0	0	0	0	0	61456.2	0	MALE	#N/A	#N/A
OX382156.1	MSTRG.6723	Osclob_v00_mik.OX382156.1G431.1	MSTRG.6723.4	Osclob_v00_mik.OX382156.1G431	0	0	366	11194	0	0	0	0	0	2890	0	MALE	#N/A	#N/A
OX382156.1	MSTRG.6723	Osclob_v00_mik.OX382156.1G431.1	MSTRG.6723.5	Osclob_v00_mik.OX382156.1G431	3046	2805	2042	7751	5833	6946	4762	9742	9427	3911	7342	MALE	#N/A	#N/A
OX382156.1	MSTRG.6723	Osclob_v00_mik.OX382156.1G431.1	MSTRG.6723.6	Osclob_v00_mik.OX382156.1G431	16430	0	0	33201	0	1	0	0	0	12407.8	0.2	MALE	#N/A	#N/A
OX382156.1	MSTRG.6723	Osclob_v00_mik.OX382156.1G431.1	MSTRG.6723.7	Osclob_v00_mik.OX382156.1G431	0	0	0	42061	0	0	0	0	0	10515.2	0	MALE	#N/A	#N/A
OX382156.1	MSTRG.6723	Osclob_v00_mik.OX382156.1G431.1	MSTRG.6723.8	Osclob_v00_mik.OX382156.1G431	0	0	0	0	0	0	13	0	0	0	2.6	MALE	#N/A	#N/A
OX382156.1	MSTRG.6723	Osclob_v00_mik.OX382156.1G431.1	MSTRG.6723.9	Osclob_v00_mik.OX382156.1G431	0	0	0	0	0	13127	31	0	0	0	2631.6	MALE	#N/A	#N/A
OX382156.1	MSTRG.6723	Osclob_v00_mik.OX382156.1G431.1	MSTRG.6723.10	Osclob_v00_mik.OX382156.1G431	0	0	0	0	0	1007	0	0	0	0	201.4	MALE	#N/A	#N/A
OX382156.1	MSTRG.6723	Osclob_v00_mik.OX382156.1G431.1	MSTRG.6723.11	Osclob_v00_mik.OX382156.1G431	0	0	0	7	0	0	0	0	14969	1.75	2993.8	MALE	#N/A	#N/A
OX382156.1	MSTRG.6754	Osclob_v00_mik.OX382156.1G378.1	MSTRG.6754.1	Osclob_v00_mik.OX382156.1G378	1325224	1203938	176220	355696	17074	122067	74788	175626	97389	765270	97388.8	MALE	#N/A	#N/A
OX382156.1	MSTRG.6754	Osclob_v00_mik.OX382156.1G378.1	MSTRG.6754.2	Osclob_v00_mik.OX382156.1G378	33	29249	15	36	22	11	7	83	33	7333.25	31.2	MALE	#N/A	#N/A
OX382156.1	MSTRG.6754	Osclob_v00_mik.OX382156.1G378.1	MSTRG.6754.3	Osclob_v00_mik.OX382156.1G378	0	0	0	0	0	1	0	0	21	0	4.4	MALE	#N/A	#N/A
OX382156.1	MSTRG.6754	Osclob_v00_mik.OX382156.1G378.1	MSTRG.6754.4	Osclob_v00_mik.OX382156.1G378	0	219592	0	0	0	0	0	0	29	54898	5.8	MALE	#N/A	#N/A
OX382156.1	MSTRG.6754	Osclob_v00_mik.OX382156.1G378.1	MSTRG.6754.5	Osclob_v00_mik.OX382156.1G378	12899	7319	26506	6132	5533	23909	15056	83137	7197	13214	26966.4	MALE	#N/A	#N/A
OX382156.1	MSTRG.6754	Osclob_v00_mik.OX382156.1G378.1	MSTRG.6754.6	Osclob_v00_mik.OX382156.1G378	137697	5837	0	4	0	0	3787	329	16610	35884.5	4145.2	MALE	#N/A	#N/A
OX382156.1	MSTRG.6754	Osclob_v00_mik.OX382156.1G378.1	MSTRG.6754.7	Osclob_v00_mik.OX382156.1G378	3074	39841	11489	495	1414	7842	2250	18061	1988	13724.8	6311	MALE	#N/A	#N/A
OX382156.1	MSTRG.6754	Osclob_v00_mik.OX382156.1G378.1	MSTRG.6754.8	Osclob_v00_mik.OX382156.1G378	27911	27555	31763	4564	19139	3830	3484	30636	22588	22948.2	15935.4	MALE	#N/A	#N/A
OX382156.1	MSTRG.6754	Osclob_v00_mik.OX382156.1G378.1	MSTRG.6754.9	Osclob_v00_mik.OX382156.1G378	0	27	45950	16707	545	0	0	70774	2724	15671	14808.6	MALE	#N/A	#N/A
OX382156.1	MSTRG.6754	Osclob_v00_mik.OX382156.1G378.1	MSTRG.6754.10	Osclob_v00_mik.OX382156.1G378	5548	13	0	8255	6073	34997	21790	0	98373	3454	32246.6	MALE	#N/A	#N/A
OX382156.1	MSTRG.6754	Osclob_v00_mik.OX382156.1G378.1	MSTRG.6754.11	Osclob_v00_mik.OX382156.1G378	1905	671	2971	7152	11504	596	1772	10349	16261	3174.75	8096.4	MALE	#N/A	#N/A
OX382156.1	MSTRG.6754	Osclob_v00_mik.OX382156.1G378.1	MSTRG.6754.12	Osclob_v00_mik.OX382156.1G378	1489392	941340	108290	521527	8071	45217	72786	49083	212697	765137	77570.8	MALE	#N/A	#N/A
OX382156.1	MSTRG.6754	Osclob_v00_mik.OX382156.1G378.1	MSTRG.6754.13	Osclob_v00_mik.OX382156.1G378	469034	494921	121231	144442	11548	50977	62505	157172	59710	307407	68382.4	MALE	#N/A	#N/A
OX382156.1	MSTRG.6754	Osclob_v00_mik.OX382156.1G378.1	MSTRG.6754.14	Osclob_v00_mik.OX382156.1G378	0	0	0	0	0	30443	66	0	0	0	6101.8	MALE	#N/A	#N/A
OX382156.1	MSTRG.6802	Osclob_v00_mik.OX382156.1G429.1	MSTRG.6802.1	Osclob_v00_mik.OX382156.1G429	1989	502	1568	784	917	4725	387	2589	1147	1210.75	1953	MALE	2010655	#N/A
OX382156.1	MSTRG.6802	Osclob_v00_mik.OX382156.1G429.1	MSTRG.6802.2	Osclob_v00_mik.OX382156.1G429	2635	163	0	28	979	76	5	297	772	706.5	425.8	MALE	2010655	#N/A
OX382156.1	MSTRG.6802	Osclob_v00_mik.OX382156.1G429.1	MSTRG.6802.3	Osclob_v00_mik.OX382156.1G429	0	1621	0	1448	1054	0	1887	0	0	767.25	588.2	MALE	2010655	#N/A
OX382156.1	MSTRG.6802	Osclob_v00_mik.OX382156.1G429.1	MSTRG.6802.4	Osclob_v00_mik.OX382156.1G429	1955	0	2391	0	4944	0	0	4065	4752	1086.5	2752.2	MALE	2010655	#N/A
OX382156.1	MSTRG.6807	Osclob_v00_mik.OX382156.1G434.1	MSTRG.6807.1	Osclob_v00_mik.OX382156.1G434	8351	5512	7153	7009	16027	11863	7809	15948	18898	7006.25	14109	MALE	1620829	TTC28_MOUSETetratricopeptide repeat protein 28 OS=Mus musculus OX=10090 GN=Ttc28 PE=1 SV=3
OX382156.1	MSTRG.6807	Osclob_v00_mik.OX382156.1G434.1	MSTRG.6807.2	Osclob_v00_mik.OX382156.1G434	50	1304	310	0	0	843	0	81	0	416	184.8	MALE	1620829	TTC28_MOUSETetratricopeptide repeat protein 28 OS=Mus musculus OX=10090 GN=Ttc28 PE=1 SV=3
OX382156.1	MSTRG.6807	Osclob_v00_mik.OX382156.1G434.1	MSTRG.6807.5	Osclob_v00_mik.OX382156.1G434	120	107	146	0	411	0	220	302	0	93.25	186.6	MALE	1620829	TTC28_MOUSETetratricopeptide repeat protein 28 OS=Mus musculus OX=10090 GN=Ttc28 PE=1 SV=3
OX382156.1	MSTRG.6914	Osclob_v00_mik.OX382156.1G563.1	MSTRG.6914.1	Osclob_v00_mik.OX382156.1G563	3896	1757	4207	3400	9207	7335	5474	4238	6801	3315	6611	MALE	2914852	KCMA1_PIGCalcium-activated potassium channel subunit alpha-1 (Fragment) OS=Sus scrofa OX=9823 GN=KCNMA1 PE=2 SV=2
OX382156.1	MSTRG.6914	Osclob_v00_mik.OX382156.1G563.1	MSTRG.6914.3	Osclob_v00_mik.OX382156.1G563	0	709	0	0	0	0	0	3580	0	177.25	716	MALE	2914852	KCMA1_PIGCalcium-activated potassium channel subunit alpha-1 (Fragment) OS=Sus scrofa OX=9823 GN=KCNMA1 PE=2 SV=2
OX382156.1	MSTRG.6929	Osclob_v00_mik.OX382156.1G637.1	MSTRG.6929.1	Osclob_v00_mik.OX382156.1G637	6031	3599	13646	7490	36670	11373	5507	16108	864	7691.5	14104.4	MALE	#N/A	#N/A
OX382156.1	MSTRG.6929	Osclob_v00_mik.OX382156.1G637.1	MSTRG.6929.2	Osclob_v00_mik.OX382156.1G637	6314	54	12758	0	0	0	0	14025	20694	4781.5	6943.8	MALE	#N/A	#N/A
OX382156.1	MSTRG.6929	Osclob_v00_mik.OX382156.1G637.1	MSTRG.6929.3	Osclob_v00_mik.OX382156.1G637	0	9306	59	0	0	0	0	53	8426	2341.25	1695.8	MALE	#N/A	#N/A
OX382156.1	MSTRG.6967	Osclob_v00_mik.OX382156.1G575.1	MSTRG.6967.1	Osclob_v00_mik.OX382156.1G575	16274	10553	12083	15508	29073	32806	17647	22925	19110	13604.5	24312.2	MALE	#N/A	#N/A
OX382156.1	MSTRG.6967	Osclob_v00_mik.OX382156.1G575.1	MSTRG.6967.2	Osclob_v00_mik.OX382156.1G575	370	3347	4525	6974	2052	67389	3589	3812	15799	3804	18528.2	MALE	#N/A	#N/A
OX382156.1	MSTRG.6967	Osclob_v00_mik.OX382156.1G575.1	MSTRG.6967.3	Osclob_v00_mik.OX382156.1G575	2699	209	212	24	7659	0	0	2187	180	786	2005.2	MALE	#N/A	#N/A
OX382156.1	MSTRG.6967	Osclob_v00_mik.OX382156.1G575.1	MSTRG.6967.4	Osclob_v00_mik.OX382156.1G575	3596	18	5054	0	0	16	0	4171	0	2167	837.4	MALE	#N/A	#N/A
OX382156.1	MSTRG.7000	Osclob_v00_mik.OX382156.1G613.1	MSTRG.7000.1	Osclob_v00_mik.OX382156.1G613	3071	1923	4098	4200	9733	8383	5917	6936	9829	3323	8159.6	MALE	#N/A	#N/A
OX382156.1	MSTRG.7048	Osclob_v00_mik.OX382156.1G724.1	MSTRG.7048.1	Osclob_v00_mik.OX382156.1G724	12825	7266	9931	3193	21084	17858	17909	21110	27984	8303.75	21189	MALE	#N/A	#N/A
OX382157.1	MSTRG.7205	Osclob_v00_mik.OX382157.1G80.1	MSTRG.7205.1	Osclob_v00_mik.OX382157.1G80	287	63	1078	74	1943	242	194	2408	1206	375.5	1198.6	MALE	1085458	MCM8_CHICKDNA helicase MCM8 OS=Gallus gallus OX=9031 GN=MCM8 PE=1 SV=1
OX382157.1	MSTRG.7205	Osclob_v00_mik.OX382157.1G80.1	MSTRG.7205.2	Osclob_v00_mik.OX382157.1G80	0	0	0	662	0	0	0	0	0	165.5	0	MALE	1085458	MCM8_CHICKDNA helicase MCM8 OS=Gallus gallus OX=9031 GN=MCM8 PE=1 SV=1
OX382157.1	MSTRG.7213	Osclob_v00_mik.OX382157.1G90.2	MSTRG.7213.1	Osclob_v00_mik.OX382157.1G90	8539	3203	699	0	11393	3510	5541	11939	14014	3110.25	9279.4	MALE	#N/A	#N/A
OX382157.1	MSTRG.7213	Osclob_v00_mik.OX382157.1G90.2	MSTRG.7213.2	Osclob_v00_mik.OX382157.1G90	462	277	6940	2721	0	456	321	261	0	2600	207.6	MALE	#N/A	#N/A
OX382157.1	MSTRG.7213	Osclob_v00_mik.OX382157.1G90.2	MSTRG.7213.3	Osclob_v00_mik.OX382157.1G90	0	0	0	0	4396	0	0	291	1671	0	1271.6	MALE	#N/A	#N/A
OX382157.1	MSTRG.7319	Osclob_v00_mik.OX382157.1G167.1	MSTRG.7319.1	Osclob_v00_mik.OX382157.1G167	4922	1652	3671	979	2455	373	6757	402	270	2806	2051.4	MALE	#N/A	#N/A
OX382157.1	MSTRG.7319	Osclob_v00_mik.OX382157.1G167.1	MSTRG.7319.2	Osclob_v00_mik.OX382157.1G167	0	11	14	2153	5184	287	3434	0	106	544.5	1802.2	MALE	#N/A	#N/A
OX382157.1	MSTRG.7319	Osclob_v00_mik.OX382157.1G167.1	MSTRG.7319.3	Osclob_v00_mik.OX382157.1G167	1717	2907	27992	3504	6308	17186	64	1013	1087	9030	5131.6	MALE	#N/A	#N/A
OX382157.1	MSTRG.7319	Osclob_v00_mik.OX382157.1G167.1	MSTRG.7319.4	Osclob_v00_mik.OX382157.1G167	1852	1810	586	15	191	0	0	358	31	1065.75	116	MALE	#N/A	#N/A
OX382157.1	MSTRG.7319	Osclob_v00_mik.OX382157.1G167.1	MSTRG.7319.5	Osclob_v00_mik.OX382157.1G167	0	9229	897	0	0	0	0	0	0	2531.5	0	MALE	#N/A	#N/A
OX382157.1	MSTRG.7319	Osclob_v00_mik.OX382157.1G167.1	MSTRG.7319.6	Osclob_v00_mik.OX382157.1G167	0	0	70	0	1226	3	0	129	760	17.5	423.6	MALE	#N/A	#N/A
OX382157.1	MSTRG.7319	Osclob_v00_mik.OX382157.1G167.1	MSTRG.7319.7	Osclob_v00_mik.OX382157.1G167	8334	0	0	0	142	0	0	982	6664	2083.5	1557.6	MALE	#N/A	#N/A
OX382157.1	MSTRG.7319	Osclob_v00_mik.OX382157.1G167.1	MSTRG.7319.8	Osclob_v00_mik.OX382157.1G167	0	0	15	0	7492	1	0	10784	1080	3.75	3871.4	MALE	#N/A	#N/A
OX382157.1	MSTRG.7377	Osclob_v00_mik.OX382157.1G260.1	MSTRG.7377.1	Osclob_v00_mik.OX382157.1G260	666	697	270	855	1171	483	899	988	1179	622	944	MALE	#N/A	#N/A
OX382157.1	MSTRG.7378	Osclob_v00_mik.OX382157.1G253.1	MSTRG.7378.1	Osclob_v00_mik.OX382157.1G253	0	752	0	763	3787	0	0	5641	0	378.75	1885.6	MALE	2408566	AAK1_HUMANAP2-associated protein kinase 1 OS=Homo sapiens OX=9606 GN=AAK1 PE=1 SV=3
OX382157.1	MSTRG.7378	Osclob_v00_mik.OX382157.1G253.1	MSTRG.7378.2	Osclob_v00_mik.OX382157.1G253	1016	547	3542	994	2904	1284	1386	1104	10192	1524.75	3374	MALE	2408566	AAK1_HUMANAP2-associated protein kinase 1 OS=Homo sapiens OX=9606 GN=AAK1 PE=1 SV=3
OX382157.1	MSTRG.7558	Osclob_v00_mik.OX382157.1G562.1	MSTRG.7558.2	Osclob_v00_mik.OX382157.1G562	736	865	46	0	0	198	0	2124	87	411.75	481.8	MALE	1983876	-
OX382157.1	MSTRG.7558	Osclob_v00_mik.OX382157.1G562.1	MSTRG.7558.3	Osclob_v00_mik.OX382157.1G562	32	60	4967	588	5291	948	1864	2507	902	1411.75	2302.4	MALE	1983876	-
OX382157.1	MSTRG.7763	Osclob_v00_mik.OX382157.1G678.1	MSTRG.7763.2	Osclob_v00_mik.OX382157.1G678	56	7	18	0	1070	211	0	589	96	20.25	393.2	MALE	1995771	DSCL_DROMECell adhesion molecule Dscam2 OS=Drosophila melanogaster OX=7227 GN=Dscam2 PE=2 SV=3
OX382158.1	MSTRG.7907	Osclob_v00_mik.OX382158.1G26.1	MSTRG.7907.2	Osclob_v00_mik.OX382158.1G26	1075	1015	6876	3308	4118	6144	6114	1871	545	3068.5	3758.4	MALE	2402958	CKAP5_HUMANCytoskeleton-associated protein 5 OS=Homo sapiens OX=9606 GN=CKAP5 PE=1 SV=3
OX382158.1	MSTRG.7907	Osclob_v00_mik.OX382158.1G26.1	MSTRG.7907.3	Osclob_v00_mik.OX382158.1G26	18163	10147	10006	0	24274	0	11571	23063	25340	9579	16849.6	MALE	2402958	CKAP5_HUMANCytoskeleton-associated protein 5 OS=Homo sapiens OX=9606 GN=CKAP5 PE=1 SV=3
OX382158.1	MSTRG.8046	Osclob_v00_mik.OX382158.1G181.1	MSTRG.8046.3	Osclob_v00_mik.OX382158.1G181	0	0	1514	0	7849	0	0	1758	0	378.5	1921.4	MALE	#N/A	#N/A
OX382158.1	MSTRG.8113	Osclob_v00_mik.OX382158.1G236.1	MSTRG.8113.1	Osclob_v00_mik.OX382158.1G236	0	389	185	766	357	0	64	295	682	335	279.6	MALE	#N/A	#N/A
OX382158.1	MSTRG.8113	Osclob_v00_mik.OX382158.1G236.1	MSTRG.8113.2	Osclob_v00_mik.OX382158.1G236	0	0	7	0	242	0	0	431	473	1.75	229.2	MALE	#N/A	#N/A
OX382158.1	MSTRG.8128	Osclob_v00_mik.OX382158.1G239.1	MSTRG.8128.1	Osclob_v00_mik.OX382158.1G239	21	315	384	398	717	501	172	485	1221	279.5	619.2	MALE	1854615	-
OX382158.1	MSTRG.8128	Osclob_v00_mik.OX382158.1G239.1	MSTRG.8128.3	Osclob_v00_mik.OX382158.1G239	305	0	26	0	137	0	289	193	0	82.75	123.8	MALE	1854615	-
OX382158.1	MSTRG.8156	Osclob_v00_mik.OX382158.1G258.1	MSTRG.8156.1	Osclob_v00_mik.OX382158.1G258	6745	2677	5654	3252	17251	11301	3558	9752	31114	4582	14595.2	MALE	#N/A	#N/A
OX382158.1	MSTRG.8213	Osclob_v00_mik.OX382158.1G335.1	MSTRG.8213.1	Osclob_v00_mik.OX382158.1G335	0	0	7	117	0	18	0	3	95	31	23.2	MALE	1982627	CTHR1_HUMANCollagen triple helix repeat-containing protein 1 OS=Homo sapiens OX=9606 GN=CTHRC1 PE=1 SV=1
OX382158.1	MSTRG.8219	Osclob_v00_mik.OX382158.1G339.1	MSTRG.8219.1	Osclob_v00_mik.OX382158.1G339	151	105	0	105	219	0	0	1107	9	90.25	267	MALE	#N/A	#N/A
OX382158.1	MSTRG.8219	Osclob_v00_mik.OX382158.1G339.1	MSTRG.8219.3	Osclob_v00_mik.OX382158.1G339	0	0	0	0	1000	0	0	469	0	0	293.8	MALE	#N/A	#N/A
OX382158.1	MSTRG.8219	Osclob_v00_mik.OX382158.1G339.1	MSTRG.8219.4	Osclob_v00_mik.OX382158.1G339	212	0	35	0	976	0	0	282	0	61.75	251.6	MALE	#N/A	#N/A
OX382158.1	MSTRG.8243	Osclob_v00_mik.OX382158.1G320.1	MSTRG.8243.1	Osclob_v00_mik.OX382158.1G320	580	47	79	25	0	561	373	0	619	182.75	310.6	MALE	#N/A	#N/A
OX382158.1	MSTRG.8243	Osclob_v00_mik.OX382158.1G320.1	MSTRG.8243.2	Osclob_v00_mik.OX382158.1G320	19	0	368	307	548	23	115	706	753	173.5	429	MALE	#N/A	#N/A
OX382158.1	MSTRG.8245	Osclob_v00_mik.OX382158.1G321.1	MSTRG.8245.2	Osclob_v00_mik.OX382158.1G321	0	0	10	0	2	0	0	2	217	2.5	44.2	MALE	1911621	TRPA1_HUMANTransient receptor potential cation channel subfamily A member 1 OS=Homo sapiens OX=9606 GN=TRPA1 PE=1 SV=3
OX382158.1	MSTRG.8296	Osclob_v00_mik.OX382158.1G378.1	MSTRG.8296.1	Osclob_v00_mik.OX382158.1G378	0	0	0	0	18	500	8	16	6	0	109.6	MALE	#N/A	#N/A
OX382158.1	MSTRG.8296	Osclob_v00_mik.OX382158.1G378.1	MSTRG.8296.2	Osclob_v00_mik.OX382158.1G378	0	0	0	0	0	105	0	0	0	0	21	MALE	#N/A	#N/A
OX382158.1	MSTRG.8449	Osclob_v00_mik.OX382158.1G590.1	MSTRG.8449.1	Osclob_v00_mik.OX382158.1G590	0	102	0	43	16	4	2	14	62	36.25	19.6	MALE	#N/A	#N/A
OX382158.1	MSTRG.8573	Osclob_v00_mik.OX382158.1G626.1	MSTRG.8573.1	Osclob_v00_mik.OX382158.1G626	440	9	237	47	3290	1227	636	3498	248	183.25	1779.8	MALE	#N/A	#N/A
OX382158.1	MSTRG.8573	Osclob_v00_mik.OX382158.1G626.1	MSTRG.8573.4	Osclob_v00_mik.OX382158.1G626	102	0	0	0	0	0	0	0	0	25.5	0	MALE	#N/A	#N/A
OX382158.1	MSTRG.8573	Osclob_v00_mik.OX382158.1G626.1	MSTRG.8573.5	Osclob_v00_mik.OX382158.1G626	135	0	826	0	64	0	0	71	287	240.25	84.4	MALE	#N/A	#N/A
OX382158.1	MSTRG.8573	Osclob_v00_mik.OX382158.1G626.1	MSTRG.8573.7	Osclob_v00_mik.OX382158.1G626	52	4	76	6	138	163	0	136	13	34.5	90	MALE	#N/A	#N/A
OX382158.1	MSTRG.8573	Osclob_v00_mik.OX382158.1G626.1	MSTRG.8573.9	Osclob_v00_mik.OX382158.1G626	0	0	13	0	58	327	20	1020	107	3.25	306.4	MALE	#N/A	#N/A
OX382158.1	MSTRG.8573	Osclob_v00_mik.OX382158.1G629.1	MSTRG.8573.1	Osclob_v00_mik.OX382158.1G629	440	9	237	47	3290	1227	636	3498	248	183.25	1779.8	MALE	1730873	-
OX382158.1	MSTRG.8573	Osclob_v00_mik.OX382158.1G629.1	MSTRG.8573.4	Osclob_v00_mik.OX382158.1G629	102	0	0	0	0	0	0	0	0	25.5	0	MALE	1730873	-
OX382158.1	MSTRG.8573	Osclob_v00_mik.OX382158.1G629.1	MSTRG.8573.5	Osclob_v00_mik.OX382158.1G629	135	0	826	0	64	0	0	71	287	240.25	84.4	MALE	1730873	-
OX382158.1	MSTRG.8573	Osclob_v00_mik.OX382158.1G629.1	MSTRG.8573.7	Osclob_v00_mik.OX382158.1G629	52	4	76	6	138	163	0	136	13	34.5	90	MALE	1730873	-
OX382158.1	MSTRG.8573	Osclob_v00_mik.OX382158.1G629.1	MSTRG.8573.9	Osclob_v00_mik.OX382158.1G629	0	0	13	0	58	327	20	1020	107	3.25	306.4	MALE	1730873	-
OX382158.1	MSTRG.8573	Osclob_v00_mik.OX382158.1G629.1	MSTRG.8573.10	Osclob_v00_mik.OX382158.1G629	0	0	148	0	0	0	0	13	0	37	2.6	MALE	1730873	-
OX382158.1	MSTRG.8573	Osclob_v00_mik.OX382158.1G629.1	MSTRG.8573.11	Osclob_v00_mik.OX382158.1G629	0	0	139	0	0	0	0	0	0	34.75	0	MALE	1730873	-
OX382158.1	MSTRG.8573	Osclob_v00_mik.OX382158.1G629.1	MSTRG.8573.12	Osclob_v00_mik.OX382158.1G629	0	0	0	0	1387	0	16	0	0	0	280.6	MALE	1730873	-
OX382158.1	MSTRG.8573	Osclob_v00_mik.OX382158.1G629.1	MSTRG.8573.13	Osclob_v00_mik.OX382158.1G629	16	67	528	161	2	200	73	1418	1663	193	671.2	MALE	1730873	-
OX382158.1	MSTRG.8576	Osclob_v00_mik.OX382158.1G627.1	MSTRG.8576.2	Osclob_v00_mik.OX382158.1G627	0	4	111	0	438	0	1	253	250	28.75	188.4	MALE	1788823	RIPK1_MOUSEReceptor-interacting serine/threonine-protein kinase 1 OS=Mus musculus OX=10090 GN=Ripk1 PE=1 SV=1
OX382158.1	MSTRG.8637	Osclob_v00_mik.OX382158.1G681.1	MSTRG.8637.1	Osclob_v00_mik.OX382158.1G681	800	1034	1217	2131	3454	1154	2143	4091	4760	1295.5	3120.4	MALE	#N/A	#N/A
OX382158.1	MSTRG.8637	Osclob_v00_mik.OX382158.1G681.1	MSTRG.8637.4	Osclob_v00_mik.OX382158.1G681	9	0	40	0	0	0	0	0	0	12.25	0	MALE	#N/A	#N/A
OX382158.1	MSTRG.8651	Osclob_v00_mik.OX382158.1G695.1	MSTRG.8651.1	Osclob_v00_mik.OX382158.1G695	3398	3529	4336	6527	11950	8373	1995	11963	10693	4447.5	8994.8	MALE	#N/A	#N/A
OX382158.1	MSTRG.8651	Osclob_v00_mik.OX382158.1G695.1	MSTRG.8651.3	Osclob_v00_mik.OX382158.1G695	3	14	3	0	0	0	0	0	2	5	0.4	MALE	#N/A	#N/A
OX382158.1	MSTRG.8651	Osclob_v00_mik.OX382158.1G695.1	MSTRG.8651.4	Osclob_v00_mik.OX382158.1G695	546	103	630	156	80	162	67	203	399	358.75	182.2	MALE	#N/A	#N/A
OX382158.1	MSTRG.8651	Osclob_v00_mik.OX382158.1G695.1	MSTRG.8651.7	Osclob_v00_mik.OX382158.1G695	196	712	932	2482	673	0	1860	1452	113	1080.5	819.6	MALE	#N/A	#N/A
OX382158.1	MSTRG.8651	Osclob_v00_mik.OX382158.1G695.1	MSTRG.8651.8	Osclob_v00_mik.OX382158.1G695	57	444	27	0	1	0	115	10	10	132	27.2	MALE	#N/A	#N/A
OX382158.1	MSTRG.8651	Osclob_v00_mik.OX382158.1G695.1	MSTRG.8651.9	Osclob_v00_mik.OX382158.1G695	205	0	0	0	1089	0	0	0	479	51.25	313.6	MALE	#N/A	#N/A
OX382158.1	MSTRG.8651	Osclob_v00_mik.OX382158.1G695.1	MSTRG.8651.10	Osclob_v00_mik.OX382158.1G695	40	1	23	312	456	586	7	321	549	94	383.8	MALE	#N/A	#N/A
OX382158.1	MSTRG.8651	Osclob_v00_mik.OX382158.1G695.1	MSTRG.8651.11	Osclob_v00_mik.OX382158.1G695	0	27	0	0	0	2596	0	0	0	6.75	519.2	MALE	#N/A	#N/A
OX382158.1	MSTRG.8651	Osclob_v00_mik.OX382158.1G695.1	MSTRG.8651.13	Osclob_v00_mik.OX382158.1G695	4	87	34	14	106	70	6	46	32	34.75	52	MALE	#N/A	#N/A
OX382158.1	MSTRG.8651	Osclob_v00_mik.OX382158.1G695.1	MSTRG.8651.15	Osclob_v00_mik.OX382158.1G695	38	0	34	7	0	0	0	0	1	19.75	0.2	MALE	#N/A	#N/A
OX382158.1	MSTRG.8651	Osclob_v00_mik.OX382158.1G695.1	MSTRG.8651.18	Osclob_v00_mik.OX382158.1G695	0	1	0	0	0	0	0	110	0	0.25	22	MALE	#N/A	#N/A
OX382158.1	MSTRG.8651	Osclob_v00_mik.OX382158.1G695.1	MSTRG.8651.19	Osclob_v00_mik.OX382158.1G695	37	87	142	573	29	420	30	56	126	209.75	132.2	MALE	#N/A	#N/A
OX382158.1	MSTRG.8651	Osclob_v00_mik.OX382158.1G695.1	MSTRG.8651.20	Osclob_v00_mik.OX382158.1G695	14	28	13	198	28	273	20	21	68	63.25	82	MALE	#N/A	#N/A
OX382158.1	MSTRG.8701	Osclob_v00_mik.OX382158.1G759.1	MSTRG.8701.2	Osclob_v00_mik.OX382158.1G759	184	7	1	197	7099	93	721	5689	5625	97.25	3845.4	MALE	1806979	-
OX382158.1	MSTRG.8701	Osclob_v00_mik.OX382158.1G759.1	MSTRG.8701.3	Osclob_v00_mik.OX382158.1G759	439	0	0	0	0	0	0	0	0	109.75	0	MALE	1806979	-
OX382158.1	MSTRG.8701	Osclob_v00_mik.OX382158.1G759.1	MSTRG.8701.4	Osclob_v00_mik.OX382158.1G759	0	11	7	1	0	8	0	14	23	4.75	9	MALE	1806979	-
OX382158.1	MSTRG.8701	Osclob_v00_mik.OX382158.1G759.1	MSTRG.8701.6	Osclob_v00_mik.OX382158.1G759	0	0	0	0	21	732	310	0	0	0	212.6	MALE	1806979	-
OX382158.1	MSTRG.8701	Osclob_v00_mik.OX382158.1G759.1	MSTRG.8701.7	Osclob_v00_mik.OX382158.1G759	168	72	148	73	862	360	0	84	1205	115.25	502.2	MALE	1806979	-
OX382158.1	MSTRG.8701	Osclob_v00_mik.OX382158.1G759.1	MSTRG.8701.8	Osclob_v00_mik.OX382158.1G759	0	0	0	0	45	1582	0	19	13	0	331.8	MALE	1806979	-
OX382158.1	MSTRG.8701	Osclob_v00_mik.OX382158.1G759.1	MSTRG.8701.10	Osclob_v00_mik.OX382158.1G759	524	34	94	1076	78	2399	97	225	708	432	701.4	MALE	1806979	-
OX382158.1	MSTRG.8701	Osclob_v00_mik.OX382158.1G759.1	MSTRG.8701.11	Osclob_v00_mik.OX382158.1G759	0	264	224	0	550	0	1364	695	0	122	521.8	MALE	1806979	-
OX382158.1	MSTRG.8701	Osclob_v00_mik.OX382158.1G759.1	MSTRG.8701.12	Osclob_v00_mik.OX382158.1G759	0	227	0	0	0	0	0	0	0	56.75	0	MALE	1806979	-
OX382158.1	MSTRG.8701	Osclob_v00_mik.OX382158.1G759.1	MSTRG.8701.14	Osclob_v00_mik.OX382158.1G759	1201	380	4190	1811	6010	1494	4165	10071	1776	1895.5	4703.2	MALE	1806979	-
OX382158.1	MSTRG.8701	Osclob_v00_mik.OX382158.1G759.1	MSTRG.8701.15	Osclob_v00_mik.OX382158.1G759	0	2356	0	0	4768	0	0	0	0	589	953.6	MALE	1806979	-
OX382158.1	MSTRG.8701	Osclob_v00_mik.OX382158.1G760.1	MSTRG.8701.2	Osclob_v00_mik.OX382158.1G760	184	7	1	197	7099	93	721	5689	5625	97.25	3845.4	MALE	3084589	RUVB2_XENLARuvB-like 2 OS=Xenopus laevis OX=8355 GN=ruvbl2 PE=2 SV=1
OX382158.1	MSTRG.8701	Osclob_v00_mik.OX382158.1G760.1	MSTRG.8701.3	Osclob_v00_mik.OX382158.1G760	439	0	0	0	0	0	0	0	0	109.75	0	MALE	3084589	RUVB2_XENLARuvB-like 2 OS=Xenopus laevis OX=8355 GN=ruvbl2 PE=2 SV=1
OX382158.1	MSTRG.8701	Osclob_v00_mik.OX382158.1G760.1	MSTRG.8701.4	Osclob_v00_mik.OX382158.1G760	0	11	7	1	0	8	0	14	23	4.75	9	MALE	3084589	RUVB2_XENLARuvB-like 2 OS=Xenopus laevis OX=8355 GN=ruvbl2 PE=2 SV=1
OX382158.1	MSTRG.8701	Osclob_v00_mik.OX382158.1G760.1	MSTRG.8701.6	Osclob_v00_mik.OX382158.1G760	0	0	0	0	21	732	310	0	0	0	212.6	MALE	3084589	RUVB2_XENLARuvB-like 2 OS=Xenopus laevis OX=8355 GN=ruvbl2 PE=2 SV=1
OX382158.1	MSTRG.8701	Osclob_v00_mik.OX382158.1G760.1	MSTRG.8701.7	Osclob_v00_mik.OX382158.1G760	168	72	148	73	862	360	0	84	1205	115.25	502.2	MALE	3084589	RUVB2_XENLARuvB-like 2 OS=Xenopus laevis OX=8355 GN=ruvbl2 PE=2 SV=1
OX382158.1	MSTRG.8701	Osclob_v00_mik.OX382158.1G760.1	MSTRG.8701.8	Osclob_v00_mik.OX382158.1G760	0	0	0	0	45	1582	0	19	13	0	331.8	MALE	3084589	RUVB2_XENLARuvB-like 2 OS=Xenopus laevis OX=8355 GN=ruvbl2 PE=2 SV=1
OX382158.1	MSTRG.8701	Osclob_v00_mik.OX382158.1G760.1	MSTRG.8701.10	Osclob_v00_mik.OX382158.1G760	524	34	94	1076	78	2399	97	225	708	432	701.4	MALE	3084589	RUVB2_XENLARuvB-like 2 OS=Xenopus laevis OX=8355 GN=ruvbl2 PE=2 SV=1
OX382158.1	MSTRG.8701	Osclob_v00_mik.OX382158.1G760.1	MSTRG.8701.11	Osclob_v00_mik.OX382158.1G760	0	264	224	0	550	0	1364	695	0	122	521.8	MALE	3084589	RUVB2_XENLARuvB-like 2 OS=Xenopus laevis OX=8355 GN=ruvbl2 PE=2 SV=1
OX382158.1	MSTRG.8701	Osclob_v00_mik.OX382158.1G760.1	MSTRG.8701.12	Osclob_v00_mik.OX382158.1G760	0	227	0	0	0	0	0	0	0	56.75	0	MALE	3084589	RUVB2_XENLARuvB-like 2 OS=Xenopus laevis OX=8355 GN=ruvbl2 PE=2 SV=1
OX382158.1	MSTRG.8701	Osclob_v00_mik.OX382158.1G760.1	MSTRG.8701.14	Osclob_v00_mik.OX382158.1G760	1201	380	4190	1811	6010	1494	4165	10071	1776	1895.5	4703.2	MALE	3084589	RUVB2_XENLARuvB-like 2 OS=Xenopus laevis OX=8355 GN=ruvbl2 PE=2 SV=1
OX382158.1	MSTRG.8701	Osclob_v00_mik.OX382158.1G760.1	MSTRG.8701.15	Osclob_v00_mik.OX382158.1G760	0	2356	0	0	4768	0	0	0	0	589	953.6	MALE	3084589	RUVB2_XENLARuvB-like 2 OS=Xenopus laevis OX=8355 GN=ruvbl2 PE=2 SV=1
OX382158.1	MSTRG.8726	Osclob_v00_mik.OX382158.1G784.1	MSTRG.8726.1	Osclob_v00_mik.OX382158.1G784	9172	2996	6985	6636	14945	11231	4104	15113	16453	6447.25	12369.2	MALE	#N/A	#N/A
OX382158.1	MSTRG.8726	Osclob_v00_mik.OX382158.1G784.1	MSTRG.8726.3	Osclob_v00_mik.OX382158.1G784	0	0	76	0	577	8	25	314	26	19	190	MALE	#N/A	#N/A
OX382158.1	MSTRG.8726	Osclob_v00_mik.OX382158.1G784.1	MSTRG.8726.6	Osclob_v00_mik.OX382158.1G784	22	23	2067	57	6732	123	5128	6105	83	542.25	3634.2	MALE	#N/A	#N/A
OX382158.1	MSTRG.8726	Osclob_v00_mik.OX382158.1G784.1	MSTRG.8726.7	Osclob_v00_mik.OX382158.1G784	0	0	2	0	96	1	0	1	0	0.5	19.6	MALE	#N/A	#N/A
OX382159.1	MSTRG.8793	Osclob_v00_mik.OX382159.1G100.1	MSTRG.8793.1	Osclob_v00_mik.OX382159.1G100	5515	5629	6872	6015	3577	8039	1902	1301	3193	6007.75	3602.4	MALE	#N/A	#N/A
OX382159.1	MSTRG.8793	Osclob_v00_mik.OX382159.1G100.1	MSTRG.8793.3	Osclob_v00_mik.OX382159.1G100	167	0	46	0	0	0	0	0	0	53.25	0	MALE	#N/A	#N/A
OX382159.1	MSTRG.8800	Osclob_v00_mik.OX382159.1G57.1	MSTRG.8800.1	Osclob_v00_mik.OX382159.1G57	33019	9423	31975	21204	62584	27112	11439	36875	43834	23905.2	36368.8	MALE	1469010	LAMA1_HUMANLaminin subunit alpha-1 OS=Homo sapiens OX=9606 GN=LAMA1 PE=1 SV=2
OX382159.1	MSTRG.8800	Osclob_v00_mik.OX382159.1G57.1	MSTRG.8800.2	Osclob_v00_mik.OX382159.1G57	12	55	57	0	316	46	0	233	41	31	127.2	MALE	1469010	LAMA1_HUMANLaminin subunit alpha-1 OS=Homo sapiens OX=9606 GN=LAMA1 PE=1 SV=2
OX382159.1	MSTRG.8800	Osclob_v00_mik.OX382159.1G57.1	MSTRG.8800.6	Osclob_v00_mik.OX382159.1G57	0	0	0	0	430	0	0	757	0	0	237.4	MALE	1469010	LAMA1_HUMANLaminin subunit alpha-1 OS=Homo sapiens OX=9606 GN=LAMA1 PE=1 SV=2
OX382159.1	MSTRG.8800	Osclob_v00_mik.OX382159.1G57.1	MSTRG.8800.7	Osclob_v00_mik.OX382159.1G57	11	223	385	454	610	19126	0	258	0	268.25	3998.8	MALE	1469010	LAMA1_HUMANLaminin subunit alpha-1 OS=Homo sapiens OX=9606 GN=LAMA1 PE=1 SV=2
OX382159.1	MSTRG.8800	Osclob_v00_mik.OX382159.1G57.1	MSTRG.8800.8	Osclob_v00_mik.OX382159.1G57	12417	531	9061	229	38055	34	5452	22853	62575	5559.5	25793.8	MALE	1469010	LAMA1_HUMANLaminin subunit alpha-1 OS=Homo sapiens OX=9606 GN=LAMA1 PE=1 SV=2
OX382159.1	MSTRG.8800	Osclob_v00_mik.OX382159.1G57.1	MSTRG.8800.9	Osclob_v00_mik.OX382159.1G57	3768	2411	17732	17401	71072	0	4126	45810	9557	10328	26113	MALE	1469010	LAMA1_HUMANLaminin subunit alpha-1 OS=Homo sapiens OX=9606 GN=LAMA1 PE=1 SV=2
OX382159.1	MSTRG.8800	Osclob_v00_mik.OX382159.1G57.1	MSTRG.8800.10	Osclob_v00_mik.OX382159.1G57	0	0	0	0	0	0	0	19653	0	0	3930.6	MALE	1469010	LAMA1_HUMANLaminin subunit alpha-1 OS=Homo sapiens OX=9606 GN=LAMA1 PE=1 SV=2
OX382159.1	MSTRG.8800	Osclob_v00_mik.OX382159.1G57.1	MSTRG.8800.11	Osclob_v00_mik.OX382159.1G57	213	1	129	0	624	0	0	1748	447	85.75	563.8	MALE	1469010	LAMA1_HUMANLaminin subunit alpha-1 OS=Homo sapiens OX=9606 GN=LAMA1 PE=1 SV=2
OX382159.1	MSTRG.8800	Osclob_v00_mik.OX382159.1G57.1	MSTRG.8800.12	Osclob_v00_mik.OX382159.1G57	122	49	0	0	9831	1176	0	1837	107	42.75	2590.2	MALE	1469010	LAMA1_HUMANLaminin subunit alpha-1 OS=Homo sapiens OX=9606 GN=LAMA1 PE=1 SV=2
OX382159.1	MSTRG.8800	Osclob_v00_mik.OX382159.1G57.1	MSTRG.8800.13	Osclob_v00_mik.OX382159.1G57	311	308	537	508	664	979	0	246	1018	416	581.4	MALE	1469010	LAMA1_HUMANLaminin subunit alpha-1 OS=Homo sapiens OX=9606 GN=LAMA1 PE=1 SV=2
OX382159.1	MSTRG.8800	Osclob_v00_mik.OX382159.1G57.1	MSTRG.8800.14	Osclob_v00_mik.OX382159.1G57	553	0	230	46	7378	37379	0	10095	1119	207.25	11194.2	MALE	1469010	LAMA1_HUMANLaminin subunit alpha-1 OS=Homo sapiens OX=9606 GN=LAMA1 PE=1 SV=2
OX382159.1	MSTRG.8800	Osclob_v00_mik.OX382159.1G57.1	MSTRG.8800.15	Osclob_v00_mik.OX382159.1G57	3080	814	0	0	702	0	0	29	2416	973.5	629.4	MALE	1469010	LAMA1_HUMANLaminin subunit alpha-1 OS=Homo sapiens OX=9606 GN=LAMA1 PE=1 SV=2
OX382159.1	MSTRG.8800	Osclob_v00_mik.OX382159.1G57.1	MSTRG.8800.16	Osclob_v00_mik.OX382159.1G57	2117	652	2303	2158	317	6173	54	69	1257	1807.5	1574	MALE	1469010	LAMA1_HUMANLaminin subunit alpha-1 OS=Homo sapiens OX=9606 GN=LAMA1 PE=1 SV=2
OX382159.1	MSTRG.8800	Osclob_v00_mik.OX382159.1G57.1	MSTRG.8800.18	Osclob_v00_mik.OX382159.1G57	10507	2143	15	3731	0	10468	0	0	14429	4099	4979.4	MALE	1469010	LAMA1_HUMANLaminin subunit alpha-1 OS=Homo sapiens OX=9606 GN=LAMA1 PE=1 SV=2
OX382159.1	MSTRG.8800	Osclob_v00_mik.OX382159.1G57.1	MSTRG.8800.19	Osclob_v00_mik.OX382159.1G57	182	0	137	0	0	5089	0	0	0	79.75	1017.8	MALE	1469010	LAMA1_HUMANLaminin subunit alpha-1 OS=Homo sapiens OX=9606 GN=LAMA1 PE=1 SV=2
OX382159.1	MSTRG.8800	Osclob_v00_mik.OX382159.1G57.1	MSTRG.8800.20	Osclob_v00_mik.OX382159.1G57	0	0	171	0	0	989	0	0	0	42.75	197.8	MALE	1469010	LAMA1_HUMANLaminin subunit alpha-1 OS=Homo sapiens OX=9606 GN=LAMA1 PE=1 SV=2
OX382159.1	MSTRG.8800	Osclob_v00_mik.OX382159.1G57.1	MSTRG.8800.24	Osclob_v00_mik.OX382159.1G57	0	0	12	2	1325	780	199	487	15	3.5	561.2	MALE	1469010	LAMA1_HUMANLaminin subunit alpha-1 OS=Homo sapiens OX=9606 GN=LAMA1 PE=1 SV=2
OX382159.1	MSTRG.8800	Osclob_v00_mik.OX382159.1G57.1	MSTRG.8800.25	Osclob_v00_mik.OX382159.1G57	47	78	0	0	149	0	0	163	80	31.25	78.4	MALE	1469010	LAMA1_HUMANLaminin subunit alpha-1 OS=Homo sapiens OX=9606 GN=LAMA1 PE=1 SV=2
OX382159.1	MSTRG.8800	Osclob_v00_mik.OX382159.1G57.1	MSTRG.8800.26	Osclob_v00_mik.OX382159.1G57	72	45	0	46	247	156	119	38	3	40.75	112.6	MALE	1469010	LAMA1_HUMANLaminin subunit alpha-1 OS=Homo sapiens OX=9606 GN=LAMA1 PE=1 SV=2
OX382159.1	MSTRG.8853	Osclob_v00_mik.OX382159.1G141.1	MSTRG.8853.1	Osclob_v00_mik.OX382159.1G141	3605	2922	9903	5773	15067	18100	10118	15976	8391	5550.75	13530.4	MALE	2341144	TTLL6_DANRETubulin polyglutamylase ttll6 OS=Danio rerio OX=7955 GN=ttll6 PE=2 SV=1
OX382159.1	MSTRG.8855	Osclob_v00_mik.OX382159.1G143.1	MSTRG.8855.1	Osclob_v00_mik.OX382159.1G143	3296	3048	2467	4377	7671	3467	5145	5346	7089	3297	5743.6	MALE	3085064	NAT10_HUMANRNA cytidine acetyltransferase OS=Homo sapiens OX=9606 GN=NAT10 PE=1 SV=2
OX382159.1	MSTRG.8855	Osclob_v00_mik.OX382159.1G143.1	MSTRG.8855.3	Osclob_v00_mik.OX382159.1G143	0	0	0	0	0	234	0	0	0	0	46.8	MALE	3085064	NAT10_HUMANRNA cytidine acetyltransferase OS=Homo sapiens OX=9606 GN=NAT10 PE=1 SV=2
OX382159.1	MSTRG.8868	Osclob_v00_mik.OX382159.1G154.2	MSTRG.8868.1	Osclob_v00_mik.OX382159.1G154	2154	129	523	814	543	700	450	1355	2658	905	1141.2	MALE	#N/A	#N/A
OX382159.1	MSTRG.8868	Osclob_v00_mik.OX382159.1G154.2	MSTRG.8868.3	Osclob_v00_mik.OX382159.1G154	7254	1644	8855	11175	5703	6125	6475	18743	2152	7232	7839.6	MALE	#N/A	#N/A
OX382159.1	MSTRG.8876	Osclob_v00_mik.OX382159.1G160.1	MSTRG.8876.1	Osclob_v00_mik.OX382159.1G160	1007	379	926	1924	2328	38	1286	2606	2295	1059	1710.6	MALE	2702403	ASM_MOUSESphingomyelin phosphodiesterase OS=Mus musculus OX=10090 GN=Smpd1 PE=1 SV=2
OX382159.1	MSTRG.8876	Osclob_v00_mik.OX382159.1G160.1	MSTRG.8876.2	Osclob_v00_mik.OX382159.1G160	0	0	0	0	744	1375	0	446	0	0	513	MALE	2702403	ASM_MOUSESphingomyelin phosphodiesterase OS=Mus musculus OX=10090 GN=Smpd1 PE=1 SV=2
OX382159.1	MSTRG.8892	Osclob_v00_mik.OX382159.1G173.1	MSTRG.8892.3	Osclob_v00_mik.OX382159.1G173	83	1059	1061	4336	6382	7713	530	11121	3294	1634.75	5808	MALE	3636477	MGT5B_HUMANAlpha-1,6-mannosylglycoprotein 6-beta-N-acetylglucosaminyltransferase B OS=Homo sapiens OX=9606 GN=MGAT5B PE=1 SV=2
OX382159.1	MSTRG.8892	Osclob_v00_mik.OX382159.1G173.1	MSTRG.8892.4	Osclob_v00_mik.OX382159.1G173	7	96	156	419	69	403	1171	57	33	169.5	346.6	MALE	3636477	MGT5B_HUMANAlpha-1,6-mannosylglycoprotein 6-beta-N-acetylglucosaminyltransferase B OS=Homo sapiens OX=9606 GN=MGAT5B PE=1 SV=2
OX382159.1	MSTRG.8892	Osclob_v00_mik.OX382159.1G173.1	MSTRG.8892.5	Osclob_v00_mik.OX382159.1G173	8	0	97	8	142	519	0	43	4	28.25	141.6	MALE	3636477	MGT5B_HUMANAlpha-1,6-mannosylglycoprotein 6-beta-N-acetylglucosaminyltransferase B OS=Homo sapiens OX=9606 GN=MGAT5B PE=1 SV=2
OX382159.1	MSTRG.8892	Osclob_v00_mik.OX382159.1G173.1	MSTRG.8892.6	Osclob_v00_mik.OX382159.1G173	0	0	0	0	60	297	0	20	37	0	82.8	MALE	3636477	MGT5B_HUMANAlpha-1,6-mannosylglycoprotein 6-beta-N-acetylglucosaminyltransferase B OS=Homo sapiens OX=9606 GN=MGAT5B PE=1 SV=2
OX382159.1	MSTRG.8892	Osclob_v00_mik.OX382159.1G173.1	MSTRG.8892.7	Osclob_v00_mik.OX382159.1G173	276	0	38	0	0	75	0	164	16	78.5	51	MALE	3636477	MGT5B_HUMANAlpha-1,6-mannosylglycoprotein 6-beta-N-acetylglucosaminyltransferase B OS=Homo sapiens OX=9606 GN=MGAT5B PE=1 SV=2
OX382159.1	MSTRG.8892	Osclob_v00_mik.OX382159.1G173.1	MSTRG.8892.8	Osclob_v00_mik.OX382159.1G173	6243	1506	3104	6	10430	626	5110	4595	7736	2714.75	5699.4	MALE	3636477	MGT5B_HUMANAlpha-1,6-mannosylglycoprotein 6-beta-N-acetylglucosaminyltransferase B OS=Homo sapiens OX=9606 GN=MGAT5B PE=1 SV=2
OX382159.1	MSTRG.8892	Osclob_v00_mik.OX382159.1G173.1	MSTRG.8892.9	Osclob_v00_mik.OX382159.1G173	10	560	43	0	0	125	1080	0	12	153.25	243.4	MALE	3636477	MGT5B_HUMANAlpha-1,6-mannosylglycoprotein 6-beta-N-acetylglucosaminyltransferase B OS=Homo sapiens OX=9606 GN=MGAT5B PE=1 SV=2
OX382159.1	MSTRG.8892	Osclob_v00_mik.OX382159.1G173.1	MSTRG.8892.10	Osclob_v00_mik.OX382159.1G173	0	0	254	609	0	59	0	0	137	215.75	39.2	MALE	3636477	MGT5B_HUMANAlpha-1,6-mannosylglycoprotein 6-beta-N-acetylglucosaminyltransferase B OS=Homo sapiens OX=9606 GN=MGAT5B PE=1 SV=2
OX382159.1	MSTRG.8892	Osclob_v00_mik.OX382159.1G173.1	MSTRG.8892.12	Osclob_v00_mik.OX382159.1G173	5	129	0	0	0	54	0	0	0	33.5	10.8	MALE	3636477	MGT5B_HUMANAlpha-1,6-mannosylglycoprotein 6-beta-N-acetylglucosaminyltransferase B OS=Homo sapiens OX=9606 GN=MGAT5B PE=1 SV=2
OX382159.1	MSTRG.9000	Osclob_v00_mik.OX382159.1G306.1	MSTRG.9000.2	Osclob_v00_mik.OX382159.1G306	1357	1222	1355	0	2861	0	802	2262	2066	983.5	1598.2	MALE	#N/A	#N/A
OX382159.1	MSTRG.9002	Osclob_v00_mik.OX382159.1G308.2	MSTRG.9002.1	Osclob_v00_mik.OX382159.1G308	1464	335	3260	388	4823	2934	4840	10056	6454	1361.75	5821.4	MALE	#N/A	#N/A
OX382159.1	MSTRG.9002	Osclob_v00_mik.OX382159.1G308.2	MSTRG.9002.2	Osclob_v00_mik.OX382159.1G308	2321	235	2040	144	33040	720	1480	30647	28029	1185	18783.2	MALE	#N/A	#N/A
OX382159.1	MSTRG.9002	Osclob_v00_mik.OX382159.1G308.2	MSTRG.9002.3	Osclob_v00_mik.OX382159.1G308	0	0	52	0	5336	0	2401	16763	4836	13	5867.2	MALE	#N/A	#N/A
OX382159.1	MSTRG.9002	Osclob_v00_mik.OX382159.1G308.2	MSTRG.9002.4	Osclob_v00_mik.OX382159.1G308	5	1	0	0	3081	70	617	2289	760	1.5	1363.4	MALE	#N/A	#N/A
OX382159.1	MSTRG.9002	Osclob_v00_mik.OX382159.1G308.2	MSTRG.9002.5	Osclob_v00_mik.OX382159.1G308	83187	44613	1718	31910	0	4104	0	0	0	40357	820.8	MALE	#N/A	#N/A
OX382159.1	MSTRG.9002	Osclob_v00_mik.OX382159.1G308.2	MSTRG.9002.6	Osclob_v00_mik.OX382159.1G308	2484	2490	1520	25027	25599	652	17454	9442	19986	7880.25	14626.6	MALE	#N/A	#N/A
OX382159.1	MSTRG.9002	Osclob_v00_mik.OX382159.1G308.2	MSTRG.9002.7	Osclob_v00_mik.OX382159.1G308	0	0	0	614	4597	1673	542	0	20607	153.5	5483.8	MALE	#N/A	#N/A
OX382159.1	MSTRG.9002	Osclob_v00_mik.OX382159.1G308.2	MSTRG.9002.8	Osclob_v00_mik.OX382159.1G308	1840	1203	3047	0	2695	48	1205	9284	17600	1522.5	6166.4	MALE	#N/A	#N/A
OX382159.1	MSTRG.9002	Osclob_v00_mik.OX382159.1G308.2	MSTRG.9002.9	Osclob_v00_mik.OX382159.1G308	0	0	140	0	112767	760	29725	65843	88415	35	59502	MALE	#N/A	#N/A
OX382159.1	MSTRG.9002	Osclob_v00_mik.OX382159.1G308.2	MSTRG.9002.10	Osclob_v00_mik.OX382159.1G308	6327	0	40704	28591	0	95554	0	0	394	18905.5	19189.6	MALE	#N/A	#N/A
OX382159.1	MSTRG.9002	Osclob_v00_mik.OX382159.1G308.2	MSTRG.9002.11	Osclob_v00_mik.OX382159.1G308	690	53	628	0	6902	0	244	767	68	342.75	1596.2	MALE	#N/A	#N/A
OX382159.1	MSTRG.9002	Osclob_v00_mik.OX382159.1G308.2	MSTRG.9002.14	Osclob_v00_mik.OX382159.1G308	0	0	0	0	4	0	0	0	0	0	0.8	MALE	#N/A	#N/A
OX382159.1	MSTRG.9103	Osclob_v00_mik.OX382159.1G440.1	MSTRG.9103.1	Osclob_v00_mik.OX382159.1G440	14981	2480	16128	14305	46790	22055	8070	51784	73272	11973.5	40394.2	MALE	#N/A	#N/A
OX382159.1	MSTRG.9103	Osclob_v00_mik.OX382159.1G440.1	MSTRG.9103.2	Osclob_v00_mik.OX382159.1G440	3529	19	4053	1448	22253	1682	998	11714	16822	2262.25	10693.8	MALE	#N/A	#N/A
OX382159.1	MSTRG.9183	Osclob_v00_mik.OX382159.1G495.1	MSTRG.9183.1	Osclob_v00_mik.OX382159.1G495	433	2121	1383	501	1829	278	904	3335	1375	1109.5	1544.2	MALE	2475114	PTHD3_MOUSEPatched domain-containing protein 3 OS=Mus musculus OX=10090 GN=Ptchd3 PE=1 SV=1
OX382159.1	MSTRG.9183	Osclob_v00_mik.OX382159.1G495.1	MSTRG.9183.2	Osclob_v00_mik.OX382159.1G495	3	4	4	0	34	0	0	138	0	2.75	34.4	MALE	2475114	PTHD3_MOUSEPatched domain-containing protein 3 OS=Mus musculus OX=10090 GN=Ptchd3 PE=1 SV=1
OX382159.1	MSTRG.9183	Osclob_v00_mik.OX382159.1G495.1	MSTRG.9183.5	Osclob_v00_mik.OX382159.1G495	0	68	26	0	1534	0	0	3492	0	23.5	1005.2	MALE	2475114	PTHD3_MOUSEPatched domain-containing protein 3 OS=Mus musculus OX=10090 GN=Ptchd3 PE=1 SV=1
OX382159.1	MSTRG.9183	Osclob_v00_mik.OX382159.1G495.1	MSTRG.9183.7	Osclob_v00_mik.OX382159.1G495	123	39	272	69	864	71	255	180	540	125.75	382	MALE	2475114	PTHD3_MOUSEPatched domain-containing protein 3 OS=Mus musculus OX=10090 GN=Ptchd3 PE=1 SV=1
OX382159.1	MSTRG.9183	Osclob_v00_mik.OX382159.1G495.1	MSTRG.9183.9	Osclob_v00_mik.OX382159.1G495	8	0	0	0	0	198	0	6	33	2	47.4	MALE	2475114	PTHD3_MOUSEPatched domain-containing protein 3 OS=Mus musculus OX=10090 GN=Ptchd3 PE=1 SV=1
OX382159.1	MSTRG.9183	Osclob_v00_mik.OX382159.1G495.1	MSTRG.9183.11	Osclob_v00_mik.OX382159.1G495	48	0	87	0	170	25	28	42	20	33.75	57	MALE	2475114	PTHD3_MOUSEPatched domain-containing protein 3 OS=Mus musculus OX=10090 GN=Ptchd3 PE=1 SV=1
OX382159.1	MSTRG.9183	Osclob_v00_mik.OX382159.1G495.1	MSTRG.9183.12	Osclob_v00_mik.OX382159.1G495	0	0	0	0	586	0	0	80	83	0	149.8	MALE	2475114	PTHD3_MOUSEPatched domain-containing protein 3 OS=Mus musculus OX=10090 GN=Ptchd3 PE=1 SV=1
OX382159.1	MSTRG.9183	Osclob_v00_mik.OX382159.1G495.1	MSTRG.9183.13	Osclob_v00_mik.OX382159.1G495	0	0	0	0	0	0	253	0	13	0	53.2	MALE	2475114	PTHD3_MOUSEPatched domain-containing protein 3 OS=Mus musculus OX=10090 GN=Ptchd3 PE=1 SV=1
OX382159.1	MSTRG.9183	Osclob_v00_mik.OX382159.1G495.1	MSTRG.9183.14	Osclob_v00_mik.OX382159.1G495	232	242	1733	456	10653	998	1560	5136	721	665.75	3813.6	MALE	2475114	PTHD3_MOUSEPatched domain-containing protein 3 OS=Mus musculus OX=10090 GN=Ptchd3 PE=1 SV=1
OX382159.1	MSTRG.9183	Osclob_v00_mik.OX382159.1G495.1	MSTRG.9183.15	Osclob_v00_mik.OX382159.1G495	1792	1984	1114	2468	10008	24350	4061	2839	0	1839.5	8251.6	MALE	2475114	PTHD3_MOUSEPatched domain-containing protein 3 OS=Mus musculus OX=10090 GN=Ptchd3 PE=1 SV=1
OX382159.1	MSTRG.9183	Osclob_v00_mik.OX382159.1G495.1	MSTRG.9183.17	Osclob_v00_mik.OX382159.1G495	4	0	0	0	2	1	0	2	1	1	1.2	MALE	2475114	PTHD3_MOUSEPatched domain-containing protein 3 OS=Mus musculus OX=10090 GN=Ptchd3 PE=1 SV=1
OX382159.1	MSTRG.9183	Osclob_v00_mik.OX382159.1G495.1	MSTRG.9183.20	Osclob_v00_mik.OX382159.1G495	6863	5488	12722	5174	25976	4930	5495	22296	34891	7561.75	18717.6	MALE	2475114	PTHD3_MOUSEPatched domain-containing protein 3 OS=Mus musculus OX=10090 GN=Ptchd3 PE=1 SV=1
OX382159.1	MSTRG.9183	Osclob_v00_mik.OX382159.1G495.1	MSTRG.9183.23	Osclob_v00_mik.OX382159.1G495	939	460	359	530	621	2626	726	1086	1409	572	1293.6	MALE	2475114	PTHD3_MOUSEPatched domain-containing protein 3 OS=Mus musculus OX=10090 GN=Ptchd3 PE=1 SV=1
OX382159.1	MSTRG.9212	Osclob_v00_mik.OX382159.1G545.1	MSTRG.9212.4	Osclob_v00_mik.OX382159.1G545	158	470	176	6	161	47	579	199	1837	202.5	564.6	MALE	#N/A	#N/A
OX382159.1	MSTRG.9212	Osclob_v00_mik.OX382159.1G545.1	MSTRG.9212.5	Osclob_v00_mik.OX382159.1G545	392	0	540	0	0	0	0	0	251	233	50.2	MALE	#N/A	#N/A
OX382159.1	MSTRG.9212	Osclob_v00_mik.OX382159.1G545.1	MSTRG.9212.6	Osclob_v00_mik.OX382159.1G545	2658	302	1143	1397	0	7224	63	0	1356	1375	1728.6	MALE	#N/A	#N/A
OX382159.1	MSTRG.9421	Osclob_v00_mik.OX382159.1G770.1	MSTRG.9421.1	Osclob_v00_mik.OX382159.1G770	191	271	691	52	2439	198	1388	2366	348	301.25	1347.8	MALE	#N/A	#N/A
OX382159.1	MSTRG.9421	Osclob_v00_mik.OX382159.1G770.1	MSTRG.9421.4	Osclob_v00_mik.OX382159.1G770	0	0	16	0	44	0	383	0	0	4	85.4	MALE	#N/A	#N/A
OX382160.1	MSTRG.9490	Osclob_v00_mik.OX382160.1G53.1	MSTRG.9490.1	Osclob_v00_mik.OX382160.1G53	15385	23492	13935	23880	39191	33728	25726	34425	28759	19173	32365.8	MALE	#N/A	#N/A
OX382160.1	MSTRG.9557	Osclob_v00_mik.OX382160.1G191.1	MSTRG.9557.1	Osclob_v00_mik.OX382160.1G191	1971	1027	1419	1182	3740	1902	1489	3936	2512	1399.75	2715.8	MALE	#N/A	#N/A
OX382160.1	MSTRG.9631	Osclob_v00_mik.OX382160.1G228.1	MSTRG.9631.1	Osclob_v00_mik.OX382160.1G228	201	2628	67	1335	1721	8518	2210	2247	3900	1057.75	3719.2	MALE	#N/A	#N/A
OX382160.1	MSTRG.9631	Osclob_v00_mik.OX382160.1G228.1	MSTRG.9631.2	Osclob_v00_mik.OX382160.1G228	0	1	0	1	29	0	5	2	0	0.5	7.2	MALE	#N/A	#N/A
OX382160.1	MSTRG.9631	Osclob_v00_mik.OX382160.1G228.1	MSTRG.9631.3	Osclob_v00_mik.OX382160.1G228	32254	22152	26123	24662	62668	27538	46881	57765	54343	26297.8	49839	MALE	#N/A	#N/A
OX382160.1	MSTRG.9631	Osclob_v00_mik.OX382160.1G228.1	MSTRG.9631.4	Osclob_v00_mik.OX382160.1G228	3516	17636	12169	446	104	13702	0	36	2404	8441.75	3249.2	MALE	#N/A	#N/A
OX382160.1	MSTRG.9631	Osclob_v00_mik.OX382160.1G228.1	MSTRG.9631.8	Osclob_v00_mik.OX382160.1G228	1	1	1	1	10	1	2	1	1	1	3	MALE	#N/A	#N/A
OX382160.1	MSTRG.9631	Osclob_v00_mik.OX382160.1G228.1	MSTRG.9631.9	Osclob_v00_mik.OX382160.1G228	0	34	101	39	9209	20681	6050	110	17	43.5	7213.4	MALE	#N/A	#N/A
OX382160.1	MSTRG.9631	Osclob_v00_mik.OX382160.1G229.1	MSTRG.9631.1	Osclob_v00_mik.OX382160.1G229	201	2628	67	1335	1721	8518	2210	2247	3900	1057.75	3719.2	MALE	2329992	M3KCL_MOUSEMAP3K7 C-terminal-like protein OS=Mus musculus OX=10090 GN=Map3k7cl PE=2 SV=1
OX382160.1	MSTRG.9631	Osclob_v00_mik.OX382160.1G229.1	MSTRG.9631.2	Osclob_v00_mik.OX382160.1G229	0	1	0	1	29	0	5	2	0	0.5	7.2	MALE	2329992	M3KCL_MOUSEMAP3K7 C-terminal-like protein OS=Mus musculus OX=10090 GN=Map3k7cl PE=2 SV=1
OX382160.1	MSTRG.9631	Osclob_v00_mik.OX382160.1G229.1	MSTRG.9631.3	Osclob_v00_mik.OX382160.1G229	32254	22152	26123	24662	62668	27538	46881	57765	54343	26297.8	49839	MALE	2329992	M3KCL_MOUSEMAP3K7 C-terminal-like protein OS=Mus musculus OX=10090 GN=Map3k7cl PE=2 SV=1
OX382160.1	MSTRG.9631	Osclob_v00_mik.OX382160.1G229.1	MSTRG.9631.4	Osclob_v00_mik.OX382160.1G229	3516	17636	12169	446	104	13702	0	36	2404	8441.75	3249.2	MALE	2329992	M3KCL_MOUSEMAP3K7 C-terminal-like protein OS=Mus musculus OX=10090 GN=Map3k7cl PE=2 SV=1
OX382160.1	MSTRG.9631	Osclob_v00_mik.OX382160.1G229.1	MSTRG.9631.8	Osclob_v00_mik.OX382160.1G229	1	1	1	1	10	1	2	1	1	1	3	MALE	2329992	M3KCL_MOUSEMAP3K7 C-terminal-like protein OS=Mus musculus OX=10090 GN=Map3k7cl PE=2 SV=1
OX382160.1	MSTRG.9631	Osclob_v00_mik.OX382160.1G229.1	MSTRG.9631.9	Osclob_v00_mik.OX382160.1G229	0	34	101	39	9209	20681	6050	110	17	43.5	7213.4	MALE	2329992	M3KCL_MOUSEMAP3K7 C-terminal-like protein OS=Mus musculus OX=10090 GN=Map3k7cl PE=2 SV=1
OX382160.1	MSTRG.9729	Osclob_v00_mik.OX382160.1G346.1	MSTRG.9729.1	Osclob_v00_mik.OX382160.1G346	27635	2930	27352	15336	93739	42243	6577	92649	122532	18313.2	71548	MALE	1553753	FAT4_MOUSEProtocadherin Fat 4 OS=Mus musculus OX=10090 GN=Fat4 PE=1 SV=2
OX382160.1	MSTRG.9747	Osclob_v00_mik.OX382160.1G364.1	MSTRG.9747.1	Osclob_v00_mik.OX382160.1G364	38371	32546	21383	38579	98540	78748	32214	119640	210286	32719.8	107886	MALE	#N/A	#N/A
OX382160.1	MSTRG.9747	Osclob_v00_mik.OX382160.1G364.1	MSTRG.9747.3	Osclob_v00_mik.OX382160.1G364	445	1008	3087	621	20	1345	103	14	90	1290.25	314.4	MALE	#N/A	#N/A
OX382160.1	MSTRG.9747	Osclob_v00_mik.OX382160.1G364.1	MSTRG.9747.4	Osclob_v00_mik.OX382160.1G364	3	0	0	74	3274	2863	406	63005	13265	19.25	16562.6	MALE	#N/A	#N/A
OX382160.1	MSTRG.9747	Osclob_v00_mik.OX382160.1G364.1	MSTRG.9747.5	Osclob_v00_mik.OX382160.1G364	0	0	0	13	968	38	81	1319	279	3.25	537	MALE	#N/A	#N/A
OX382160.1	MSTRG.9747	Osclob_v00_mik.OX382160.1G364.1	MSTRG.9747.6	Osclob_v00_mik.OX382160.1G364	0	0	0	19	89	6	2	25	22	4.75	28.8	MALE	#N/A	#N/A
OX382160.1	MSTRG.9747	Osclob_v00_mik.OX382160.1G364.1	MSTRG.9747.7	Osclob_v00_mik.OX382160.1G364	0	0	0	0	0	0	6	0	24	0	6	MALE	#N/A	#N/A
OX382160.1	MSTRG.9747	Osclob_v00_mik.OX382160.1G364.1	MSTRG.9747.8	Osclob_v00_mik.OX382160.1G364	0	0	0	2	33	5	12	30	128	0.5	41.6	MALE	#N/A	#N/A
OX382160.1	MSTRG.9747	Osclob_v00_mik.OX382160.1G364.1	MSTRG.9747.9	Osclob_v00_mik.OX382160.1G364	4	4	13	6	20	7	0	10	24	6.75	12.2	MALE	#N/A	#N/A
OX382160.1	MSTRG.9747	Osclob_v00_mik.OX382160.1G364.1	MSTRG.9747.10	Osclob_v00_mik.OX382160.1G364	219	0	0	0	271	0	0	199	736	54.75	241.2	MALE	#N/A	#N/A
OX382160.1	MSTRG.9747	Osclob_v00_mik.OX382160.1G364.2	MSTRG.9747.1	Osclob_v00_mik.OX382160.1G364	38371	32546	21383	38579	98540	78748	32214	119640	210286	32719.8	107886	MALE	#N/A	#N/A
OX382160.1	MSTRG.9747	Osclob_v00_mik.OX382160.1G364.2	MSTRG.9747.3	Osclob_v00_mik.OX382160.1G364	445	1008	3087	621	20	1345	103	14	90	1290.25	314.4	MALE	#N/A	#N/A
OX382160.1	MSTRG.9747	Osclob_v00_mik.OX382160.1G364.2	MSTRG.9747.4	Osclob_v00_mik.OX382160.1G364	3	0	0	74	3274	2863	406	63005	13265	19.25	16562.6	MALE	#N/A	#N/A
OX382160.1	MSTRG.9747	Osclob_v00_mik.OX382160.1G364.2	MSTRG.9747.5	Osclob_v00_mik.OX382160.1G364	0	0	0	13	968	38	81	1319	279	3.25	537	MALE	#N/A	#N/A
OX382160.1	MSTRG.9747	Osclob_v00_mik.OX382160.1G364.2	MSTRG.9747.6	Osclob_v00_mik.OX382160.1G364	0	0	0	19	89	6	2	25	22	4.75	28.8	MALE	#N/A	#N/A
OX382160.1	MSTRG.9747	Osclob_v00_mik.OX382160.1G364.2	MSTRG.9747.7	Osclob_v00_mik.OX382160.1G364	0	0	0	0	0	0	6	0	24	0	6	MALE	#N/A	#N/A
OX382160.1	MSTRG.9747	Osclob_v00_mik.OX382160.1G364.2	MSTRG.9747.8	Osclob_v00_mik.OX382160.1G364	0	0	0	2	33	5	12	30	128	0.5	41.6	MALE	#N/A	#N/A
OX382160.1	MSTRG.9747	Osclob_v00_mik.OX382160.1G364.2	MSTRG.9747.9	Osclob_v00_mik.OX382160.1G364	4	4	13	6	20	7	0	10	24	6.75	12.2	MALE	#N/A	#N/A
OX382160.1	MSTRG.9747	Osclob_v00_mik.OX382160.1G364.2	MSTRG.9747.10	Osclob_v00_mik.OX382160.1G364	219	0	0	0	271	0	0	199	736	54.75	241.2	MALE	#N/A	#N/A
OX382160.1	MSTRG.9747	Osclob_v00_mik.OX382160.1G370.1	MSTRG.9747.1	Osclob_v00_mik.OX382160.1G370	38371	32546	21383	38579	98540	78748	32214	119640	210286	32719.8	107886	MALE	3252782	EFCB6_HUMANEF-hand calcium-binding domain-containing protein 6 OS=Homo sapiens OX=9606 GN=EFCAB6 PE=1 SV=1
OX382160.1	MSTRG.9747	Osclob_v00_mik.OX382160.1G370.1	MSTRG.9747.3	Osclob_v00_mik.OX382160.1G370	445	1008	3087	621	20	1345	103	14	90	1290.25	314.4	MALE	3252782	EFCB6_HUMANEF-hand calcium-binding domain-containing protein 6 OS=Homo sapiens OX=9606 GN=EFCAB6 PE=1 SV=1
OX382160.1	MSTRG.9747	Osclob_v00_mik.OX382160.1G370.1	MSTRG.9747.4	Osclob_v00_mik.OX382160.1G370	3	0	0	74	3274	2863	406	63005	13265	19.25	16562.6	MALE	3252782	EFCB6_HUMANEF-hand calcium-binding domain-containing protein 6 OS=Homo sapiens OX=9606 GN=EFCAB6 PE=1 SV=1
OX382160.1	MSTRG.9747	Osclob_v00_mik.OX382160.1G370.1	MSTRG.9747.5	Osclob_v00_mik.OX382160.1G370	0	0	0	13	968	38	81	1319	279	3.25	537	MALE	3252782	EFCB6_HUMANEF-hand calcium-binding domain-containing protein 6 OS=Homo sapiens OX=9606 GN=EFCAB6 PE=1 SV=1
OX382160.1	MSTRG.9747	Osclob_v00_mik.OX382160.1G370.1	MSTRG.9747.6	Osclob_v00_mik.OX382160.1G370	0	0	0	19	89	6	2	25	22	4.75	28.8	MALE	3252782	EFCB6_HUMANEF-hand calcium-binding domain-containing protein 6 OS=Homo sapiens OX=9606 GN=EFCAB6 PE=1 SV=1
OX382160.1	MSTRG.9747	Osclob_v00_mik.OX382160.1G370.1	MSTRG.9747.7	Osclob_v00_mik.OX382160.1G370	0	0	0	0	0	0	6	0	24	0	6	MALE	3252782	EFCB6_HUMANEF-hand calcium-binding domain-containing protein 6 OS=Homo sapiens OX=9606 GN=EFCAB6 PE=1 SV=1
OX382160.1	MSTRG.9747	Osclob_v00_mik.OX382160.1G370.1	MSTRG.9747.8	Osclob_v00_mik.OX382160.1G370	0	0	0	2	33	5	12	30	128	0.5	41.6	MALE	3252782	EFCB6_HUMANEF-hand calcium-binding domain-containing protein 6 OS=Homo sapiens OX=9606 GN=EFCAB6 PE=1 SV=1
OX382160.1	MSTRG.9747	Osclob_v00_mik.OX382160.1G370.1	MSTRG.9747.9	Osclob_v00_mik.OX382160.1G370	4	4	13	6	20	7	0	10	24	6.75	12.2	MALE	3252782	EFCB6_HUMANEF-hand calcium-binding domain-containing protein 6 OS=Homo sapiens OX=9606 GN=EFCAB6 PE=1 SV=1
OX382160.1	MSTRG.9747	Osclob_v00_mik.OX382160.1G370.1	MSTRG.9747.10	Osclob_v00_mik.OX382160.1G370	219	0	0	0	271	0	0	199	736	54.75	241.2	MALE	3252782	EFCB6_HUMANEF-hand calcium-binding domain-containing protein 6 OS=Homo sapiens OX=9606 GN=EFCAB6 PE=1 SV=1
OX382160.1	MSTRG.9753	Osclob_v00_mik.OX382160.1G368.1	MSTRG.9753.1	Osclob_v00_mik.OX382160.1G368	5774	5153	50	6288	9734	4703	2375	7508	6489	4316.25	6161.8	MALE	#N/A	#N/A
OX382160.1	MSTRG.9882	Osclob_v00_mik.OX382160.1G574.1	MSTRG.9882.1	Osclob_v00_mik.OX382160.1G574	571	586	680	1225	1009	1106	355	298	12	765.5	556	MALE	#N/A	#N/A
OX382160.1	MSTRG.9882	Osclob_v00_mik.OX382160.1G574.1	MSTRG.9882.2	Osclob_v00_mik.OX382160.1G574	0	0	0	0	80	0	414	806	0	0	260	MALE	#N/A	#N/A
OX382160.1	MSTRG.9911	Osclob_v00_mik.OX382160.1G572.1	MSTRG.9911.1	Osclob_v00_mik.OX382160.1G572	0	22	19	132	10	43	22	13	34	43.25	24.4	MALE	1676326	QORX_HUMANQuinone oxidoreductase PIG3 OS=Homo sapiens OX=9606 GN=TP53I3 PE=1 SV=2
OX382160.1	MSTRG.9911	Osclob_v00_mik.OX382160.1G572.1	MSTRG.9911.2	Osclob_v00_mik.OX382160.1G572	26	0	0	62	233	0	10	89	516	22	169.6	MALE	1676326	QORX_HUMANQuinone oxidoreductase PIG3 OS=Homo sapiens OX=9606 GN=TP53I3 PE=1 SV=2
OX382160.1	MSTRG.9911	Osclob_v00_mik.OX382160.1G572.1	MSTRG.9911.3	Osclob_v00_mik.OX382160.1G572	67	50	176	33	509	283	418	479	394	81.5	416.6	MALE	1676326	QORX_HUMANQuinone oxidoreductase PIG3 OS=Homo sapiens OX=9606 GN=TP53I3 PE=1 SV=2
OX382160.1	MSTRG.9957	Osclob_v00_mik.OX382160.1G619.1	MSTRG.9957.1	Osclob_v00_mik.OX382160.1G619	904	406	383	1186	4739	2828	732	2486	4759	719.75	3108.8	MALE	#N/A	#N/A
OX382160.1	MSTRG.9957	Osclob_v00_mik.OX382160.1G619.1	MSTRG.9957.4	Osclob_v00_mik.OX382160.1G619	481	233	1767	386	3165	1691	80	982	5194	716.75	2222.4	MALE	#N/A	#N/A
OX382160.1	MSTRG.9957	Osclob_v00_mik.OX382160.1G619.1	MSTRG.9957.5	Osclob_v00_mik.OX382160.1G619	1822	0	815	0	301	93	0	8242	3448	659.25	2416.8	MALE	#N/A	#N/A
OX382160.1	MSTRG.9957	Osclob_v00_mik.OX382160.1G619.1	MSTRG.9957.6	Osclob_v00_mik.OX382160.1G619	124	74	803	0	339	85	0	328	3561	250.25	862.6	MALE	#N/A	#N/A
OX382160.1	MSTRG.9957	Osclob_v00_mik.OX382160.1G619.1	MSTRG.9957.7	Osclob_v00_mik.OX382160.1G619	1	0	1	1	18	1	2	6	20	0.75	9.4	MALE	#N/A	#N/A
OX382161.1	MSTRG.10241	Osclob_v00_mik.OX382161.1G72.1	MSTRG.10241.1	Osclob_v00_mik.OX382161.1G72	2384	1606	670	2464	487	1799	509	2093	4781	1781	1933.8	MALE	#N/A	#N/A
OX382161.1	MSTRG.10241	Osclob_v00_mik.OX382161.1G72.1	MSTRG.10241.2	Osclob_v00_mik.OX382161.1G72	700	0	1465	357	3728	2923	601	1448	2631	630.5	2266.2	MALE	#N/A	#N/A
OX382161.1	MSTRG.10241	Osclob_v00_mik.OX382161.1G72.1	MSTRG.10241.3	Osclob_v00_mik.OX382161.1G72	0	285	502	0	0	316	201	0	0	196.75	103.4	MALE	#N/A	#N/A
OX382161.1	MSTRG.10241	Osclob_v00_mik.OX382161.1G72.1	MSTRG.10241.5	Osclob_v00_mik.OX382161.1G72	540	229	218	0	1399	143	85	1307	1841	246.75	955	MALE	#N/A	#N/A
OX382161.1	MSTRG.10241	Osclob_v00_mik.OX382161.1G72.1	MSTRG.10241.7	Osclob_v00_mik.OX382161.1G72	52	0	1820	111	2083	41	1623	2925	3834	495.75	2101.2	MALE	#N/A	#N/A
OX382161.1	MSTRG.10241	Osclob_v00_mik.OX382161.1G72.1	MSTRG.10241.8	Osclob_v00_mik.OX382161.1G72	335	134	0	296	4	0	37	337	850	191.25	245.6	MALE	#N/A	#N/A
OX382161.1	MSTRG.10242	Osclob_v00_mik.OX382161.1G63.1	MSTRG.10242.1	Osclob_v00_mik.OX382161.1G63	0	0	640	0	3700	0	964	2846	2821	160	2066.2	MALE	2362974	-
OX382161.1	MSTRG.10242	Osclob_v00_mik.OX382161.1G63.1	MSTRG.10242.2	Osclob_v00_mik.OX382161.1G63	0	0	533	0	1655	0	764	1869	903	133.25	1038.2	MALE	2362974	-
OX382161.1	MSTRG.10242	Osclob_v00_mik.OX382161.1G63.1	MSTRG.10242.4	Osclob_v00_mik.OX382161.1G63	0	0	315	0	1651	0	489	1630	1895	78.75	1133	MALE	2362974	-
OX382161.1	MSTRG.10242	Osclob_v00_mik.OX382161.1G63.1	MSTRG.10242.5	Osclob_v00_mik.OX382161.1G63	0	0	146	0	1447	0	890	1499	963	36.5	959.8	MALE	2362974	-
OX382161.1	MSTRG.10328	Osclob_v00_mik.OX382161.1G97.1	MSTRG.10328.1	Osclob_v00_mik.OX382161.1G97	558	189	891	232	1094	1283	177	1075	1916	467.5	1109	MALE	#N/A	#N/A
OX382161.1	MSTRG.10328	Osclob_v00_mik.OX382161.1G97.1	MSTRG.10328.4	Osclob_v00_mik.OX382161.1G97	0	0	0	0	0	0	8	0	3	0	2.2	MALE	#N/A	#N/A
OX382161.1	MSTRG.10328	Osclob_v00_mik.OX382161.1G97.1	MSTRG.10328.6	Osclob_v00_mik.OX382161.1G97	0	1254	1476	384	212	1890	0	0	270	778.5	474.4	MALE	#N/A	#N/A
OX382161.1	MSTRG.10328	Osclob_v00_mik.OX382161.1G97.1	MSTRG.10328.7	Osclob_v00_mik.OX382161.1G97	158	594	365	28	30	114	137	343	7141	286.25	1553	MALE	#N/A	#N/A
OX382161.1	MSTRG.10328	Osclob_v00_mik.OX382161.1G97.1	MSTRG.10328.8	Osclob_v00_mik.OX382161.1G97	0	0	0	0	0	2	0	0	0	0	0.4	MALE	#N/A	#N/A
OX382161.1	MSTRG.10328	Osclob_v00_mik.OX382161.1G97.1	MSTRG.10328.9	Osclob_v00_mik.OX382161.1G97	0	0	0	142	0	0	0	0	0	35.5	0	MALE	#N/A	#N/A
OX382161.1	MSTRG.10328	Osclob_v00_mik.OX382161.1G97.1	MSTRG.10328.12	Osclob_v00_mik.OX382161.1G97	240	46	538	0	0	1221	1041	973	103	206	667.6	MALE	#N/A	#N/A
OX382161.1	MSTRG.10328	Osclob_v00_mik.OX382161.1G97.1	MSTRG.10328.13	Osclob_v00_mik.OX382161.1G97	62	819	40	193	7182	4553	79	52	187	278.5	2410.6	MALE	#N/A	#N/A
OX382161.1	MSTRG.10328	Osclob_v00_mik.OX382161.1G97.1	MSTRG.10328.14	Osclob_v00_mik.OX382161.1G97	4423	2092	9675	2991	1	4390	4755	1	0	4795.25	1829.4	MALE	#N/A	#N/A
OX382161.1	MSTRG.10328	Osclob_v00_mik.OX382161.1G97.1	MSTRG.10328.15	Osclob_v00_mik.OX382161.1G97	0	0	6741	0	0	0	0	0	0	1685.25	0	MALE	#N/A	#N/A
OX382161.1	MSTRG.10328	Osclob_v00_mik.OX382161.1G97.1	MSTRG.10328.16	Osclob_v00_mik.OX382161.1G97	244	32	945	846	2141	6831	203	2320	2674	516.75	2833.8	MALE	#N/A	#N/A
OX382161.1	MSTRG.10328	Osclob_v00_mik.OX382161.1G97.1	MSTRG.10328.17	Osclob_v00_mik.OX382161.1G97	0	0	1	0	0	0	0	0	70	0.25	14	MALE	#N/A	#N/A
OX382161.1	MSTRG.10458	Osclob_v00_mik.OX382161.1G328.1	MSTRG.10458.2	Osclob_v00_mik.OX382161.1G328	1	0	0	0	15	31	31	0	0	0.25	15.4	MALE	#N/A	#N/A
OX382161.1	MSTRG.10474	Osclob_v00_mik.OX382161.1G363.1	MSTRG.10474.1	Osclob_v00_mik.OX382161.1G363	0	123	504	148	52	155	9	71	33	193.75	64	MALE	#N/A	#N/A
OX382161.1	MSTRG.10474	Osclob_v00_mik.OX382161.1G363.1	MSTRG.10474.2	Osclob_v00_mik.OX382161.1G363	12	0	0	0	65	7	378	0	23	3	94.6	MALE	#N/A	#N/A
OX382161.1	MSTRG.10474	Osclob_v00_mik.OX382161.1G363.1	MSTRG.10474.3	Osclob_v00_mik.OX382161.1G363	0	69	0	435	0	2	470	491	0	126	192.6	MALE	#N/A	#N/A
OX382161.1	MSTRG.10474	Osclob_v00_mik.OX382161.1G363.1	MSTRG.10474.4	Osclob_v00_mik.OX382161.1G363	0	0	0	0	433	0	302	149	167	0	210.2	MALE	#N/A	#N/A
OX382161.1	MSTRG.10474	Osclob_v00_mik.OX382161.1G363.1	MSTRG.10474.5	Osclob_v00_mik.OX382161.1G363	64	0	0	0	39	623	0	236	131	16	205.8	MALE	#N/A	#N/A
OX382161.1	MSTRG.10474	Osclob_v00_mik.OX382161.1G363.1	MSTRG.10474.6	Osclob_v00_mik.OX382161.1G363	0	39	0	0	0	0	0	560	0	9.75	112	MALE	#N/A	#N/A
OX382161.1	MSTRG.10474	Osclob_v00_mik.OX382161.1G363.1	MSTRG.10474.7	Osclob_v00_mik.OX382161.1G363	279	227	101	213	1233	97	149	668	1717	205	772.8	MALE	#N/A	#N/A
OX382161.1	MSTRG.10481	Osclob_v00_mik.OX382161.1G223.1	MSTRG.10481.2	Osclob_v00_mik.OX382161.1G223	0	0	200	0	0	0	0	238	636	50	174.8	MALE	1306546	SNW1_PONABSNW domain-containing protein 1 OS=Pongo abelii OX=9601 GN=SNW1 PE=2 SV=1
OX382161.1	MSTRG.10481	Osclob_v00_mik.OX382161.1G223.1	MSTRG.10481.3	Osclob_v00_mik.OX382161.1G223	93	189	5	145	2	0	0	1	16	108	3.8	MALE	1306546	SNW1_PONABSNW domain-containing protein 1 OS=Pongo abelii OX=9601 GN=SNW1 PE=2 SV=1
OX382161.1	MSTRG.10484	Osclob_v00_mik.OX382161.1G226.1	MSTRG.10484.1	Osclob_v00_mik.OX382161.1G226	133	211	184	202	363	138	195	279	457	182.5	286.4	MALE	#N/A	#N/A
OX382161.1	MSTRG.10559	Osclob_v00_mik.OX382161.1G298.1	MSTRG.10559.1	Osclob_v00_mik.OX382161.1G298	7847	3888	5811	7473	30000	21693	4304	31299	48007	6254.75	27060.6	MALE	#N/A	#N/A
OX382161.1	MSTRG.10615	Osclob_v00_mik.OX382161.1G438.1	MSTRG.10615.1	Osclob_v00_mik.OX382161.1G438	3924	0	337	3539	4386	890	4469	7107	1755	1950	3721.4	MALE	1632424	RXLT1_DANRERibitol-5-phosphate xylosyltransferase 1 OS=Danio rerio OX=7955 GN=rxylt1 PE=2 SV=2
OX382161.1	MSTRG.10615	Osclob_v00_mik.OX382161.1G438.1	MSTRG.10615.2	Osclob_v00_mik.OX382161.1G438	0	741	0	3	1501	0	0	204	106	186	362.2	MALE	1632424	RXLT1_DANRERibitol-5-phosphate xylosyltransferase 1 OS=Danio rerio OX=7955 GN=rxylt1 PE=2 SV=2
OX382161.1	MSTRG.10615	Osclob_v00_mik.OX382161.1G438.1	MSTRG.10615.4	Osclob_v00_mik.OX382161.1G438	776	3423	970	450	4371	740	1990	3723	3902	1404.75	2945.2	MALE	1632424	RXLT1_DANRERibitol-5-phosphate xylosyltransferase 1 OS=Danio rerio OX=7955 GN=rxylt1 PE=2 SV=2
OX382161.1	MSTRG.10615	Osclob_v00_mik.OX382161.1G438.1	MSTRG.10615.5	Osclob_v00_mik.OX382161.1G438	0	1246	2431	2201	1709	1937	2130	2197	2006	1469.5	1995.8	MALE	1632424	RXLT1_DANRERibitol-5-phosphate xylosyltransferase 1 OS=Danio rerio OX=7955 GN=rxylt1 PE=2 SV=2
OX382161.1	MSTRG.10661	Osclob_v00_mik.OX382161.1G464.1	MSTRG.10661.1	Osclob_v00_mik.OX382161.1G464	11	0	17	0	53	0	0	49	36	7	27.6	MALE	#N/A	#N/A
OX382161.1	MSTRG.10661	Osclob_v00_mik.OX382161.1G464.1	MSTRG.10661.2	Osclob_v00_mik.OX382161.1G464	42016	17730	26768	28849	40035	67653	17257	46000	97105	28840.8	53610	MALE	#N/A	#N/A
OX382161.1	MSTRG.10724	Osclob_v00_mik.OX382161.1G540.1	MSTRG.10724.1	Osclob_v00_mik.OX382161.1G540	1602	1393	1921	1931	5377	2694	3435	4817	2038	1711.75	3672.2	MALE	#N/A	#N/A
OX382161.1	MSTRG.10724	Osclob_v00_mik.OX382161.1G541.1	MSTRG.10724.1	Osclob_v00_mik.OX382161.1G541	1602	1393	1921	1931	5377	2694	3435	4817	2038	1711.75	3672.2	MALE	#N/A	#N/A
OX382161.1	MSTRG.10759	Osclob_v00_mik.OX382161.1G584.2	MSTRG.10759.1	Osclob_v00_mik.OX382161.1G584	2016	899	1356	1530	396	2901	1310	2184	2596	1450.25	1877.4	MALE	#N/A	#N/A
OX382161.1	MSTRG.10759	Osclob_v00_mik.OX382161.1G584.2	MSTRG.10759.3	Osclob_v00_mik.OX382161.1G584	156	409	677	62	8341	2788	915	3431	2320	326	3559	MALE	#N/A	#N/A
OX382161.1	MSTRG.10759	Osclob_v00_mik.OX382161.1G584.2	MSTRG.10759.4	Osclob_v00_mik.OX382161.1G584	0	0	16	0	29	0	0	392	0	4	84.2	MALE	#N/A	#N/A
OX382161.1	MSTRG.10759	Osclob_v00_mik.OX382161.1G584.2	MSTRG.10759.7	Osclob_v00_mik.OX382161.1G584	75	0	166	0	0	45	0	0	0	60.25	9	MALE	#N/A	#N/A
OX382161.1	MSTRG.10759	Osclob_v00_mik.OX382161.1G584.2	MSTRG.10759.8	Osclob_v00_mik.OX382161.1G584	943	1025	4142	1468	1567	6334	1384	374	6601	1894.5	3252	MALE	#N/A	#N/A
OX382161.1	MSTRG.10759	Osclob_v00_mik.OX382161.1G584.2	MSTRG.10759.9	Osclob_v00_mik.OX382161.1G584	0	0	0	24	2075	0	0	3567	0	6	1128.4	MALE	#N/A	#N/A
OX382161.1	MSTRG.10759	Osclob_v00_mik.OX382161.1G584.2	MSTRG.10759.10	Osclob_v00_mik.OX382161.1G584	118	1161	1307	3432	0	206	12939	251	7389	1504.5	4157	MALE	#N/A	#N/A
OX382161.1	MSTRG.10759	Osclob_v00_mik.OX382161.1G584.2	MSTRG.10759.11	Osclob_v00_mik.OX382161.1G584	1350	550	462	1353	6168	4396	79	3038	228	928.75	2781.8	MALE	#N/A	#N/A
OX382161.1	MSTRG.10759	Osclob_v00_mik.OX382161.1G584.2	MSTRG.10759.13	Osclob_v00_mik.OX382161.1G584	20	0	0	4	0	0	0	704	0	6	140.8	MALE	#N/A	#N/A
OX382161.1	MSTRG.10759	Osclob_v00_mik.OX382161.1G584.2	MSTRG.10759.14	Osclob_v00_mik.OX382161.1G584	870	173	2147	1922	670	197337	825	948	1024	1278	40160.8	MALE	#N/A	#N/A
OX382161.1	MSTRG.10759	Osclob_v00_mik.OX382161.1G584.2	MSTRG.10759.15	Osclob_v00_mik.OX382161.1G584	388	34	283	0	7549	0	2184	1392	319	176.25	2288.8	MALE	#N/A	#N/A
OX382161.1	MSTRG.10759	Osclob_v00_mik.OX382161.1G584.2	MSTRG.10759.16	Osclob_v00_mik.OX382161.1G584	819	255	862	365	7099	0	1600	5253	3709	575.25	3532.2	MALE	#N/A	#N/A
OX382161.1	MSTRG.10759	Osclob_v00_mik.OX382161.1G584.2	MSTRG.10759.17	Osclob_v00_mik.OX382161.1G584	8457	1424	4212	0	6305	0	1155	2473	12122	3523.25	4411	MALE	#N/A	#N/A
OX382161.1	MSTRG.10759	Osclob_v00_mik.OX382161.1G584.2	MSTRG.10759.18	Osclob_v00_mik.OX382161.1G584	307	329	968	2792	467	0	0	2384	17	1099	573.6	MALE	#N/A	#N/A
OX382161.1	MSTRG.10759	Osclob_v00_mik.OX382161.1G584.2	MSTRG.10759.19	Osclob_v00_mik.OX382161.1G584	2378	6405	28543	0	17260	937	3879	13240	5545	9331.5	8172.2	MALE	#N/A	#N/A
OX382161.1	MSTRG.10759	Osclob_v00_mik.OX382161.1G584.2	MSTRG.10759.20	Osclob_v00_mik.OX382161.1G584	1776	329	6119	0	21348	0	17482	34886	1923	2056	15127.8	MALE	#N/A	#N/A
OX382161.1	MSTRG.10770	Osclob_v00_mik.OX382161.1G598.2	MSTRG.10770.4	Osclob_v00_mik.OX382161.1G598	1397	807	1612	792	1480	2408	0	2320	4463	1152	2134.2	MALE	2028402	V230_FOWPNPutative ankyrin repeat protein FPV230 OS=Fowlpox virus (strain NVSL) OX=928301 GN=FPV230 PE=4 SV=1
OX382161.1	MSTRG.10770	Osclob_v00_mik.OX382161.1G598.2	MSTRG.10770.5	Osclob_v00_mik.OX382161.1G598	1453	774	1621	0	1472	0	0	4341	3630	962	1888.6	MALE	2028402	V230_FOWPNPutative ankyrin repeat protein FPV230 OS=Fowlpox virus (strain NVSL) OX=928301 GN=FPV230 PE=4 SV=1
OX382161.1	MSTRG.10770	Osclob_v00_mik.OX382161.1G598.2	MSTRG.10770.6	Osclob_v00_mik.OX382161.1G598	7	648	0	0	2466	60	81	541	1342	163.75	898	MALE	2028402	V230_FOWPNPutative ankyrin repeat protein FPV230 OS=Fowlpox virus (strain NVSL) OX=928301 GN=FPV230 PE=4 SV=1
OX382161.1	MSTRG.10770	Osclob_v00_mik.OX382161.1G598.2	MSTRG.10770.7	Osclob_v00_mik.OX382161.1G598	111	0	0	1595	1498	3729	631	738	12	426.5	1321.6	MALE	2028402	V230_FOWPNPutative ankyrin repeat protein FPV230 OS=Fowlpox virus (strain NVSL) OX=928301 GN=FPV230 PE=4 SV=1
OX382161.1	MSTRG.10770	Osclob_v00_mik.OX382161.1G598.2	MSTRG.10770.8	Osclob_v00_mik.OX382161.1G598	357	3	114	23	90	23	3	51	0	124.25	33.4	MALE	2028402	V230_FOWPNPutative ankyrin repeat protein FPV230 OS=Fowlpox virus (strain NVSL) OX=928301 GN=FPV230 PE=4 SV=1
OX382161.1	MSTRG.10770	Osclob_v00_mik.OX382161.1G598.2	MSTRG.10770.9	Osclob_v00_mik.OX382161.1G598	291	286	263	325	1240	266	788	790	702	291.25	757.2	MALE	2028402	V230_FOWPNPutative ankyrin repeat protein FPV230 OS=Fowlpox virus (strain NVSL) OX=928301 GN=FPV230 PE=4 SV=1
OX382161.1	MSTRG.10770	Osclob_v00_mik.OX382161.1G598.2	MSTRG.10770.11	Osclob_v00_mik.OX382161.1G598	617	104	961	732	1828	1069	171	1499	0	603.5	913.4	MALE	2028402	V230_FOWPNPutative ankyrin repeat protein FPV230 OS=Fowlpox virus (strain NVSL) OX=928301 GN=FPV230 PE=4 SV=1
OX382161.1	MSTRG.10770	Osclob_v00_mik.OX382161.1G598.2	MSTRG.10770.12	Osclob_v00_mik.OX382161.1G598	0	0	0	101	0	569	0	0	9	25.25	115.6	MALE	2028402	V230_FOWPNPutative ankyrin repeat protein FPV230 OS=Fowlpox virus (strain NVSL) OX=928301 GN=FPV230 PE=4 SV=1
OX382161.1	MSTRG.10770	Osclob_v00_mik.OX382161.1G598.2	MSTRG.10770.13	Osclob_v00_mik.OX382161.1G598	0	0	74	16	203	0	0	148	0	22.5	70.2	MALE	2028402	V230_FOWPNPutative ankyrin repeat protein FPV230 OS=Fowlpox virus (strain NVSL) OX=928301 GN=FPV230 PE=4 SV=1
OX382161.1	MSTRG.10770	Osclob_v00_mik.OX382161.1G598.2	MSTRG.10770.14	Osclob_v00_mik.OX382161.1G598	1	0	0	0	2	2	18	3	284	0.25	61.8	MALE	2028402	V230_FOWPNPutative ankyrin repeat protein FPV230 OS=Fowlpox virus (strain NVSL) OX=928301 GN=FPV230 PE=4 SV=1
OX382161.1	MSTRG.10770	Osclob_v00_mik.OX382161.1G598.2	MSTRG.10770.15	Osclob_v00_mik.OX382161.1G598	64	24	187	182	1224	21	0	20007	0	114.25	4250.4	MALE	2028402	V230_FOWPNPutative ankyrin repeat protein FPV230 OS=Fowlpox virus (strain NVSL) OX=928301 GN=FPV230 PE=4 SV=1
OX382161.1	MSTRG.10770	Osclob_v00_mik.OX382161.1G598.2	MSTRG.10770.16	Osclob_v00_mik.OX382161.1G598	8410	1713	2168	455	3334	3890	5169	9973	5422	3186.5	5557.6	MALE	2028402	V230_FOWPNPutative ankyrin repeat protein FPV230 OS=Fowlpox virus (strain NVSL) OX=928301 GN=FPV230 PE=4 SV=1
OX382161.1	MSTRG.10770	Osclob_v00_mik.OX382161.1G598.2	MSTRG.10770.17	Osclob_v00_mik.OX382161.1G598	664	2	0	0	14536	0	128	793	0	166.5	3091.4	MALE	2028402	V230_FOWPNPutative ankyrin repeat protein FPV230 OS=Fowlpox virus (strain NVSL) OX=928301 GN=FPV230 PE=4 SV=1
OX382161.1	MSTRG.10770	Osclob_v00_mik.OX382161.1G598.2	MSTRG.10770.18	Osclob_v00_mik.OX382161.1G598	50	298	295	233	2801	153	1077	1663	650	219	1268.8	MALE	2028402	V230_FOWPNPutative ankyrin repeat protein FPV230 OS=Fowlpox virus (strain NVSL) OX=928301 GN=FPV230 PE=4 SV=1
OX382161.1	MSTRG.10770	Osclob_v00_mik.OX382161.1G598.2	MSTRG.10770.19	Osclob_v00_mik.OX382161.1G598	0	0	13	0	599	0	0	0	0	3.25	119.8	MALE	2028402	V230_FOWPNPutative ankyrin repeat protein FPV230 OS=Fowlpox virus (strain NVSL) OX=928301 GN=FPV230 PE=4 SV=1
OX382161.1	MSTRG.10770	Osclob_v00_mik.OX382161.1G600.1	MSTRG.10770.4	Osclob_v00_mik.OX382161.1G600	1397	807	1612	792	1480	2408	0	2320	4463	1152	2134.2	MALE	2594904	PKHF2_CHICKPleckstrin homology domain-containing family F member 2 OS=Gallus gallus OX=9031 GN=PLEKHF2 PE=2 SV=1
OX382161.1	MSTRG.10770	Osclob_v00_mik.OX382161.1G600.1	MSTRG.10770.5	Osclob_v00_mik.OX382161.1G600	1453	774	1621	0	1472	0	0	4341	3630	962	1888.6	MALE	2594904	PKHF2_CHICKPleckstrin homology domain-containing family F member 2 OS=Gallus gallus OX=9031 GN=PLEKHF2 PE=2 SV=1
OX382161.1	MSTRG.10770	Osclob_v00_mik.OX382161.1G600.1	MSTRG.10770.6	Osclob_v00_mik.OX382161.1G600	7	648	0	0	2466	60	81	541	1342	163.75	898	MALE	2594904	PKHF2_CHICKPleckstrin homology domain-containing family F member 2 OS=Gallus gallus OX=9031 GN=PLEKHF2 PE=2 SV=1
OX382161.1	MSTRG.10770	Osclob_v00_mik.OX382161.1G600.1	MSTRG.10770.7	Osclob_v00_mik.OX382161.1G600	111	0	0	1595	1498	3729	631	738	12	426.5	1321.6	MALE	2594904	PKHF2_CHICKPleckstrin homology domain-containing family F member 2 OS=Gallus gallus OX=9031 GN=PLEKHF2 PE=2 SV=1
OX382161.1	MSTRG.10770	Osclob_v00_mik.OX382161.1G600.1	MSTRG.10770.8	Osclob_v00_mik.OX382161.1G600	357	3	114	23	90	23	3	51	0	124.25	33.4	MALE	2594904	PKHF2_CHICKPleckstrin homology domain-containing family F member 2 OS=Gallus gallus OX=9031 GN=PLEKHF2 PE=2 SV=1
OX382161.1	MSTRG.10770	Osclob_v00_mik.OX382161.1G600.1	MSTRG.10770.9	Osclob_v00_mik.OX382161.1G600	291	286	263	325	1240	266	788	790	702	291.25	757.2	MALE	2594904	PKHF2_CHICKPleckstrin homology domain-containing family F member 2 OS=Gallus gallus OX=9031 GN=PLEKHF2 PE=2 SV=1
OX382161.1	MSTRG.10770	Osclob_v00_mik.OX382161.1G600.1	MSTRG.10770.11	Osclob_v00_mik.OX382161.1G600	617	104	961	732	1828	1069	171	1499	0	603.5	913.4	MALE	2594904	PKHF2_CHICKPleckstrin homology domain-containing family F member 2 OS=Gallus gallus OX=9031 GN=PLEKHF2 PE=2 SV=1
OX382161.1	MSTRG.10770	Osclob_v00_mik.OX382161.1G600.1	MSTRG.10770.12	Osclob_v00_mik.OX382161.1G600	0	0	0	101	0	569	0	0	9	25.25	115.6	MALE	2594904	PKHF2_CHICKPleckstrin homology domain-containing family F member 2 OS=Gallus gallus OX=9031 GN=PLEKHF2 PE=2 SV=1
OX382161.1	MSTRG.10770	Osclob_v00_mik.OX382161.1G600.1	MSTRG.10770.13	Osclob_v00_mik.OX382161.1G600	0	0	74	16	203	0	0	148	0	22.5	70.2	MALE	2594904	PKHF2_CHICKPleckstrin homology domain-containing family F member 2 OS=Gallus gallus OX=9031 GN=PLEKHF2 PE=2 SV=1
OX382161.1	MSTRG.10770	Osclob_v00_mik.OX382161.1G600.1	MSTRG.10770.14	Osclob_v00_mik.OX382161.1G600	1	0	0	0	2	2	18	3	284	0.25	61.8	MALE	2594904	PKHF2_CHICKPleckstrin homology domain-containing family F member 2 OS=Gallus gallus OX=9031 GN=PLEKHF2 PE=2 SV=1
OX382161.1	MSTRG.10770	Osclob_v00_mik.OX382161.1G600.1	MSTRG.10770.15	Osclob_v00_mik.OX382161.1G600	64	24	187	182	1224	21	0	20007	0	114.25	4250.4	MALE	2594904	PKHF2_CHICKPleckstrin homology domain-containing family F member 2 OS=Gallus gallus OX=9031 GN=PLEKHF2 PE=2 SV=1
OX382161.1	MSTRG.10770	Osclob_v00_mik.OX382161.1G600.1	MSTRG.10770.16	Osclob_v00_mik.OX382161.1G600	8410	1713	2168	455	3334	3890	5169	9973	5422	3186.5	5557.6	MALE	2594904	PKHF2_CHICKPleckstrin homology domain-containing family F member 2 OS=Gallus gallus OX=9031 GN=PLEKHF2 PE=2 SV=1
OX382161.1	MSTRG.10770	Osclob_v00_mik.OX382161.1G600.1	MSTRG.10770.17	Osclob_v00_mik.OX382161.1G600	664	2	0	0	14536	0	128	793	0	166.5	3091.4	MALE	2594904	PKHF2_CHICKPleckstrin homology domain-containing family F member 2 OS=Gallus gallus OX=9031 GN=PLEKHF2 PE=2 SV=1
OX382161.1	MSTRG.10770	Osclob_v00_mik.OX382161.1G600.1	MSTRG.10770.18	Osclob_v00_mik.OX382161.1G600	50	298	295	233	2801	153	1077	1663	650	219	1268.8	MALE	2594904	PKHF2_CHICKPleckstrin homology domain-containing family F member 2 OS=Gallus gallus OX=9031 GN=PLEKHF2 PE=2 SV=1
OX382161.1	MSTRG.10770	Osclob_v00_mik.OX382161.1G600.1	MSTRG.10770.19	Osclob_v00_mik.OX382161.1G600	0	0	13	0	599	0	0	0	0	3.25	119.8	MALE	2594904	PKHF2_CHICKPleckstrin homology domain-containing family F member 2 OS=Gallus gallus OX=9031 GN=PLEKHF2 PE=2 SV=1
OX382161.1	MSTRG.10770	Osclob_v00_mik.OX382161.1G600.1	MSTRG.10770.21	Osclob_v00_mik.OX382161.1G600	8968	260	369	7956	1012	2863	7877	2942	4	4388.25	2939.6	MALE	2594904	PKHF2_CHICKPleckstrin homology domain-containing family F member 2 OS=Gallus gallus OX=9031 GN=PLEKHF2 PE=2 SV=1
OX382161.1	MSTRG.10770	Osclob_v00_mik.OX382161.1G600.1	MSTRG.10770.22	Osclob_v00_mik.OX382161.1G600	19	0	0	0	234	0	1116	45	0	4.75	279	MALE	2594904	PKHF2_CHICKPleckstrin homology domain-containing family F member 2 OS=Gallus gallus OX=9031 GN=PLEKHF2 PE=2 SV=1
OX382161.1	MSTRG.10770	Osclob_v00_mik.OX382161.1G600.1	MSTRG.10770.23	Osclob_v00_mik.OX382161.1G600	131	0	316	239	328	327	182	466	111	171.5	282.8	MALE	2594904	PKHF2_CHICKPleckstrin homology domain-containing family F member 2 OS=Gallus gallus OX=9031 GN=PLEKHF2 PE=2 SV=1
OX382161.1	MSTRG.10770	Osclob_v00_mik.OX382161.1G600.1	MSTRG.10770.24	Osclob_v00_mik.OX382161.1G600	0	0	0	0	0	0	0	1	87	0	17.6	MALE	2594904	PKHF2_CHICKPleckstrin homology domain-containing family F member 2 OS=Gallus gallus OX=9031 GN=PLEKHF2 PE=2 SV=1
OX382161.1	MSTRG.10770	Osclob_v00_mik.OX382161.1G600.1	MSTRG.10770.25	Osclob_v00_mik.OX382161.1G600	32	10	7	1	42	8	2	52	14	12.5	23.6	MALE	2594904	PKHF2_CHICKPleckstrin homology domain-containing family F member 2 OS=Gallus gallus OX=9031 GN=PLEKHF2 PE=2 SV=1
OX382161.1	MSTRG.10770	Osclob_v00_mik.OX382161.1G601.1	MSTRG.10770.4	Osclob_v00_mik.OX382161.1G601	1397	807	1612	792	1480	2408	0	2320	4463	1152	2134.2	MALE	#N/A	#N/A
OX382161.1	MSTRG.10770	Osclob_v00_mik.OX382161.1G601.1	MSTRG.10770.5	Osclob_v00_mik.OX382161.1G601	1453	774	1621	0	1472	0	0	4341	3630	962	1888.6	MALE	#N/A	#N/A
OX382161.1	MSTRG.10770	Osclob_v00_mik.OX382161.1G601.1	MSTRG.10770.6	Osclob_v00_mik.OX382161.1G601	7	648	0	0	2466	60	81	541	1342	163.75	898	MALE	#N/A	#N/A
OX382161.1	MSTRG.10770	Osclob_v00_mik.OX382161.1G601.1	MSTRG.10770.7	Osclob_v00_mik.OX382161.1G601	111	0	0	1595	1498	3729	631	738	12	426.5	1321.6	MALE	#N/A	#N/A
OX382161.1	MSTRG.10770	Osclob_v00_mik.OX382161.1G601.1	MSTRG.10770.8	Osclob_v00_mik.OX382161.1G601	357	3	114	23	90	23	3	51	0	124.25	33.4	MALE	#N/A	#N/A
OX382161.1	MSTRG.10770	Osclob_v00_mik.OX382161.1G601.1	MSTRG.10770.9	Osclob_v00_mik.OX382161.1G601	291	286	263	325	1240	266	788	790	702	291.25	757.2	MALE	#N/A	#N/A
OX382161.1	MSTRG.10770	Osclob_v00_mik.OX382161.1G601.1	MSTRG.10770.11	Osclob_v00_mik.OX382161.1G601	617	104	961	732	1828	1069	171	1499	0	603.5	913.4	MALE	#N/A	#N/A
OX382161.1	MSTRG.10770	Osclob_v00_mik.OX382161.1G601.1	MSTRG.10770.12	Osclob_v00_mik.OX382161.1G601	0	0	0	101	0	569	0	0	9	25.25	115.6	MALE	#N/A	#N/A
OX382161.1	MSTRG.10770	Osclob_v00_mik.OX382161.1G601.1	MSTRG.10770.13	Osclob_v00_mik.OX382161.1G601	0	0	74	16	203	0	0	148	0	22.5	70.2	MALE	#N/A	#N/A
OX382161.1	MSTRG.10770	Osclob_v00_mik.OX382161.1G601.1	MSTRG.10770.14	Osclob_v00_mik.OX382161.1G601	1	0	0	0	2	2	18	3	284	0.25	61.8	MALE	#N/A	#N/A
OX382161.1	MSTRG.10770	Osclob_v00_mik.OX382161.1G601.1	MSTRG.10770.15	Osclob_v00_mik.OX382161.1G601	64	24	187	182	1224	21	0	20007	0	114.25	4250.4	MALE	#N/A	#N/A
OX382161.1	MSTRG.10770	Osclob_v00_mik.OX382161.1G601.1	MSTRG.10770.16	Osclob_v00_mik.OX382161.1G601	8410	1713	2168	455	3334	3890	5169	9973	5422	3186.5	5557.6	MALE	#N/A	#N/A
OX382161.1	MSTRG.10770	Osclob_v00_mik.OX382161.1G601.1	MSTRG.10770.17	Osclob_v00_mik.OX382161.1G601	664	2	0	0	14536	0	128	793	0	166.5	3091.4	MALE	#N/A	#N/A
OX382161.1	MSTRG.10770	Osclob_v00_mik.OX382161.1G601.1	MSTRG.10770.18	Osclob_v00_mik.OX382161.1G601	50	298	295	233	2801	153	1077	1663	650	219	1268.8	MALE	#N/A	#N/A
OX382161.1	MSTRG.10770	Osclob_v00_mik.OX382161.1G601.1	MSTRG.10770.19	Osclob_v00_mik.OX382161.1G601	0	0	13	0	599	0	0	0	0	3.25	119.8	MALE	#N/A	#N/A
OX382161.1	MSTRG.10770	Osclob_v00_mik.OX382161.1G601.1	MSTRG.10770.21	Osclob_v00_mik.OX382161.1G601	8968	260	369	7956	1012	2863	7877	2942	4	4388.25	2939.6	MALE	#N/A	#N/A
OX382161.1	MSTRG.10883	Osclob_v00_mik.OX382161.1G665.1	MSTRG.10883.1	Osclob_v00_mik.OX382161.1G665	23245	6495	31725	17499	52986	62197	35305	47161	37530	19741	47035.8	MALE	#N/A	#N/A
OX382161.1	MSTRG.10883	Osclob_v00_mik.OX382161.1G665.1	MSTRG.10883.2	Osclob_v00_mik.OX382161.1G665	9999	23055	0	37	0	28	5	3464	0	8272.75	699.4	MALE	#N/A	#N/A
OX382161.1	MSTRG.10883	Osclob_v00_mik.OX382161.1G665.1	MSTRG.10883.3	Osclob_v00_mik.OX382161.1G665	2532	477	57	64	8193	13	44	2338	4486	782.5	3014.8	MALE	#N/A	#N/A
OX382161.1	MSTRG.10883	Osclob_v00_mik.OX382161.1G665.1	MSTRG.10883.5	Osclob_v00_mik.OX382161.1G665	57	148	88	1655	3241	419	534	2390	2440	487	1804.8	MALE	#N/A	#N/A
OX382161.1	MSTRG.10883	Osclob_v00_mik.OX382161.1G665.1	MSTRG.10883.7	Osclob_v00_mik.OX382161.1G665	213	473	1074	660	1978	624	1663	3867	1404	605	1907.2	MALE	#N/A	#N/A
OX382161.1	MSTRG.10883	Osclob_v00_mik.OX382161.1G665.1	MSTRG.10883.9	Osclob_v00_mik.OX382161.1G665	12	3	44	1	27	23	1	25	0	15	15.2	MALE	#N/A	#N/A
OX382161.1	MSTRG.10883	Osclob_v00_mik.OX382161.1G665.1	MSTRG.10883.10	Osclob_v00_mik.OX382161.1G665	59	0	142	0	58	0	10	46	41	50.25	31	MALE	#N/A	#N/A
OX382161.1	MSTRG.10883	Osclob_v00_mik.OX382161.1G665.1	MSTRG.10883.11	Osclob_v00_mik.OX382161.1G665	0	0	0	0	1670	0	0	989	3	0	532.4	MALE	#N/A	#N/A
OX382161.1	MSTRG.10883	Osclob_v00_mik.OX382161.1G665.1	MSTRG.10883.13	Osclob_v00_mik.OX382161.1G665	1688	3	1855	0	0	3024	0	0	0	886.5	604.8	MALE	#N/A	#N/A
OX382161.1	MSTRG.10883	Osclob_v00_mik.OX382161.1G666.1	MSTRG.10883.1	Osclob_v00_mik.OX382161.1G666	23245	6495	31725	17499	52986	62197	35305	47161	37530	19741	47035.8	MALE	#N/A	#N/A
OX382161.1	MSTRG.10883	Osclob_v00_mik.OX382161.1G666.1	MSTRG.10883.2	Osclob_v00_mik.OX382161.1G666	9999	23055	0	37	0	28	5	3464	0	8272.75	699.4	MALE	#N/A	#N/A
OX382161.1	MSTRG.10883	Osclob_v00_mik.OX382161.1G666.1	MSTRG.10883.3	Osclob_v00_mik.OX382161.1G666	2532	477	57	64	8193	13	44	2338	4486	782.5	3014.8	MALE	#N/A	#N/A
OX382161.1	MSTRG.10883	Osclob_v00_mik.OX382161.1G666.1	MSTRG.10883.5	Osclob_v00_mik.OX382161.1G666	57	148	88	1655	3241	419	534	2390	2440	487	1804.8	MALE	#N/A	#N/A
OX382161.1	MSTRG.10883	Osclob_v00_mik.OX382161.1G666.1	MSTRG.10883.7	Osclob_v00_mik.OX382161.1G666	213	473	1074	660	1978	624	1663	3867	1404	605	1907.2	MALE	#N/A	#N/A
OX382161.1	MSTRG.10883	Osclob_v00_mik.OX382161.1G666.1	MSTRG.10883.9	Osclob_v00_mik.OX382161.1G666	12	3	44	1	27	23	1	25	0	15	15.2	MALE	#N/A	#N/A
OX382161.1	MSTRG.10883	Osclob_v00_mik.OX382161.1G666.1	MSTRG.10883.10	Osclob_v00_mik.OX382161.1G666	59	0	142	0	58	0	10	46	41	50.25	31	MALE	#N/A	#N/A
OX382161.1	MSTRG.10883	Osclob_v00_mik.OX382161.1G666.1	MSTRG.10883.11	Osclob_v00_mik.OX382161.1G666	0	0	0	0	1670	0	0	989	3	0	532.4	MALE	#N/A	#N/A
OX382161.1	MSTRG.10883	Osclob_v00_mik.OX382161.1G666.1	MSTRG.10883.13	Osclob_v00_mik.OX382161.1G666	1688	3	1855	0	0	3024	0	0	0	886.5	604.8	MALE	#N/A	#N/A
OX382161.1	MSTRG.10883	Osclob_v00_mik.OX382161.1G669.1	MSTRG.10883.1	Osclob_v00_mik.OX382161.1G669	23245	6495	31725	17499	52986	62197	35305	47161	37530	19741	47035.8	MALE	#N/A	#N/A
OX382161.1	MSTRG.10883	Osclob_v00_mik.OX382161.1G669.1	MSTRG.10883.2	Osclob_v00_mik.OX382161.1G669	9999	23055	0	37	0	28	5	3464	0	8272.75	699.4	MALE	#N/A	#N/A
OX382161.1	MSTRG.10883	Osclob_v00_mik.OX382161.1G669.1	MSTRG.10883.3	Osclob_v00_mik.OX382161.1G669	2532	477	57	64	8193	13	44	2338	4486	782.5	3014.8	MALE	#N/A	#N/A
OX382161.1	MSTRG.10883	Osclob_v00_mik.OX382161.1G669.1	MSTRG.10883.5	Osclob_v00_mik.OX382161.1G669	57	148	88	1655	3241	419	534	2390	2440	487	1804.8	MALE	#N/A	#N/A
OX382161.1	MSTRG.10883	Osclob_v00_mik.OX382161.1G669.1	MSTRG.10883.7	Osclob_v00_mik.OX382161.1G669	213	473	1074	660	1978	624	1663	3867	1404	605	1907.2	MALE	#N/A	#N/A
OX382161.1	MSTRG.10883	Osclob_v00_mik.OX382161.1G669.1	MSTRG.10883.9	Osclob_v00_mik.OX382161.1G669	12	3	44	1	27	23	1	25	0	15	15.2	MALE	#N/A	#N/A
OX382161.1	MSTRG.10883	Osclob_v00_mik.OX382161.1G669.1	MSTRG.10883.10	Osclob_v00_mik.OX382161.1G669	59	0	142	0	58	0	10	46	41	50.25	31	MALE	#N/A	#N/A
OX382161.1	MSTRG.10883	Osclob_v00_mik.OX382161.1G669.1	MSTRG.10883.11	Osclob_v00_mik.OX382161.1G669	0	0	0	0	1670	0	0	989	3	0	532.4	MALE	#N/A	#N/A
OX382161.1	MSTRG.10883	Osclob_v00_mik.OX382161.1G669.1	MSTRG.10883.13	Osclob_v00_mik.OX382161.1G669	1688	3	1855	0	0	3024	0	0	0	886.5	604.8	MALE	#N/A	#N/A
OX382162.1	MSTRG.11017	Osclob_v00_mik.OX382162.1G117.1	MSTRG.11017.1	Osclob_v00_mik.OX382162.1G117	3922	3664	3740	5057	12536	21998	5726	5577	6345	4095.75	10436.4	MALE	4330571	HDAC4_HUMANHistone deacetylase 4 OS=Homo sapiens OX=9606 GN=HDAC4 PE=1 SV=3
OX382162.1	MSTRG.11017	Osclob_v00_mik.OX382162.1G117.1	MSTRG.11017.3	Osclob_v00_mik.OX382162.1G117	152	508	96	474	225	197	883	3500	2766	307.5	1514.2	MALE	4330571	HDAC4_HUMANHistone deacetylase 4 OS=Homo sapiens OX=9606 GN=HDAC4 PE=1 SV=3
OX382162.1	MSTRG.11017	Osclob_v00_mik.OX382162.1G117.1	MSTRG.11017.6	Osclob_v00_mik.OX382162.1G117	6299	0	0	6877	15822	9705	0	14091	14853	3294	10894.2	MALE	4330571	HDAC4_HUMANHistone deacetylase 4 OS=Homo sapiens OX=9606 GN=HDAC4 PE=1 SV=3
OX382162.1	MSTRG.11017	Osclob_v00_mik.OX382162.1G117.1	MSTRG.11017.7	Osclob_v00_mik.OX382162.1G117	1651	2144	3399	1074	5408	3609	2679	9639	3709	2067	5008.8	MALE	4330571	HDAC4_HUMANHistone deacetylase 4 OS=Homo sapiens OX=9606 GN=HDAC4 PE=1 SV=3
OX382162.1	MSTRG.11017	Osclob_v00_mik.OX382162.1G117.2	MSTRG.11017.1	Osclob_v00_mik.OX382162.1G117	3922	3664	3740	5057	12536	21998	5726	5577	6345	4095.75	10436.4	MALE	#N/A	#N/A
OX382162.1	MSTRG.11017	Osclob_v00_mik.OX382162.1G117.2	MSTRG.11017.3	Osclob_v00_mik.OX382162.1G117	152	508	96	474	225	197	883	3500	2766	307.5	1514.2	MALE	#N/A	#N/A
OX382162.1	MSTRG.11017	Osclob_v00_mik.OX382162.1G117.2	MSTRG.11017.6	Osclob_v00_mik.OX382162.1G117	6299	0	0	6877	15822	9705	0	14091	14853	3294	10894.2	MALE	#N/A	#N/A
OX382162.1	MSTRG.11017	Osclob_v00_mik.OX382162.1G117.2	MSTRG.11017.7	Osclob_v00_mik.OX382162.1G117	1651	2144	3399	1074	5408	3609	2679	9639	3709	2067	5008.8	MALE	#N/A	#N/A
OX382162.1	MSTRG.11075	Osclob_v00_mik.OX382162.1G208.1	MSTRG.11075.1	Osclob_v00_mik.OX382162.1G208	0	0	0	0	4	3	106	32	1	0	29.2	MALE	#N/A	#N/A
OX382162.1	MSTRG.11075	Osclob_v00_mik.OX382162.1G208.1	MSTRG.11075.2	Osclob_v00_mik.OX382162.1G208	0	918	0	980	48	4020	1397	13289	6953	474.5	5141.4	MALE	#N/A	#N/A
OX382162.1	MSTRG.11075	Osclob_v00_mik.OX382162.1G208.1	MSTRG.11075.3	Osclob_v00_mik.OX382162.1G208	0	0	116	0	0	0	0	4110	0	29	822	MALE	#N/A	#N/A
OX382162.1	MSTRG.11075	Osclob_v00_mik.OX382162.1G208.1	MSTRG.11075.4	Osclob_v00_mik.OX382162.1G208	74	106	596	63	129	517	0	44	48	209.75	147.6	MALE	#N/A	#N/A
OX382162.1	MSTRG.11075	Osclob_v00_mik.OX382162.1G208.1	MSTRG.11075.5	Osclob_v00_mik.OX382162.1G208	124	31	3	14	112	346	1	63	64	43	117.2	MALE	#N/A	#N/A
OX382162.1	MSTRG.11075	Osclob_v00_mik.OX382162.1G208.1	MSTRG.11075.6	Osclob_v00_mik.OX382162.1G208	0	2	2265	431	0	1596	873	0	7833	674.5	2060.4	MALE	#N/A	#N/A
OX382162.1	MSTRG.11075	Osclob_v00_mik.OX382162.1G208.1	MSTRG.11075.7	Osclob_v00_mik.OX382162.1G208	5072	0	0	2	10528	32	86	0	0	1268.5	2129.2	MALE	#N/A	#N/A
OX382162.1	MSTRG.11075	Osclob_v00_mik.OX382162.1G208.1	MSTRG.11075.8	Osclob_v00_mik.OX382162.1G208	0	0	76	163	236	0	0	54	0	59.75	58	MALE	#N/A	#N/A
OX382162.1	MSTRG.11075	Osclob_v00_mik.OX382162.1G208.1	MSTRG.11075.11	Osclob_v00_mik.OX382162.1G208	23	263	241	0	16	135	3	0	19	131.75	34.6	MALE	#N/A	#N/A
OX382162.1	MSTRG.11075	Osclob_v00_mik.OX382162.1G208.1	MSTRG.11075.13	Osclob_v00_mik.OX382162.1G208	3	2	1	0	3	4	10	3	1	1.5	4.2	MALE	#N/A	#N/A
OX382162.1	MSTRG.11075	Osclob_v00_mik.OX382162.1G208.1	MSTRG.11075.14	Osclob_v00_mik.OX382162.1G208	0	0	0	78	123	417	0	3	202	19.5	149	MALE	#N/A	#N/A
OX382162.1	MSTRG.11075	Osclob_v00_mik.OX382162.1G208.1	MSTRG.11075.15	Osclob_v00_mik.OX382162.1G208	971	0	1497	175	3087	1647	11	1693	697	660.75	1427	MALE	#N/A	#N/A
OX382162.1	MSTRG.11075	Osclob_v00_mik.OX382162.1G208.1	MSTRG.11075.16	Osclob_v00_mik.OX382162.1G208	0	33	0	0	0	0	0	31	1979	8.25	402	MALE	#N/A	#N/A
OX382162.1	MSTRG.11075	Osclob_v00_mik.OX382162.1G208.1	MSTRG.11075.17	Osclob_v00_mik.OX382162.1G208	109	249	0	0	122	41	70	262	2205	89.5	540	MALE	#N/A	#N/A
OX382162.1	MSTRG.11075	Osclob_v00_mik.OX382162.1G208.1	MSTRG.11075.18	Osclob_v00_mik.OX382162.1G208	0	181	636	309	0	0	0	0	602	281.5	120.4	MALE	#N/A	#N/A
OX382162.1	MSTRG.11075	Osclob_v00_mik.OX382162.1G208.1	MSTRG.11075.19	Osclob_v00_mik.OX382162.1G208	0	11	159	0	0	0	0	0	0	42.5	0	MALE	#N/A	#N/A
OX382162.1	MSTRG.11075	Osclob_v00_mik.OX382162.1G208.1	MSTRG.11075.21	Osclob_v00_mik.OX382162.1G208	0	10	0	0	1319	0	0	779	1826	2.5	784.8	MALE	#N/A	#N/A
OX382162.1	MSTRG.11075	Osclob_v00_mik.OX382162.1G208.1	MSTRG.11075.24	Osclob_v00_mik.OX382162.1G208	1969	581	25	149	385	643	1008	564	531	681	626.2	MALE	#N/A	#N/A
OX382162.1	MSTRG.11075	Osclob_v00_mik.OX382162.1G208.1	MSTRG.11075.25	Osclob_v00_mik.OX382162.1G208	0	600	2875	30	2920	363	136	696	722	876.25	967.4	MALE	#N/A	#N/A
OX382162.1	MSTRG.11075	Osclob_v00_mik.OX382162.1G208.1	MSTRG.11075.26	Osclob_v00_mik.OX382162.1G208	0	0	0	0	1592	0	0	4310	0	0	1180.4	MALE	#N/A	#N/A
OX382162.1	MSTRG.11075	Osclob_v00_mik.OX382162.1G208.1	MSTRG.11075.27	Osclob_v00_mik.OX382162.1G208	200	0	831	0	0	0	0	0	1304	257.75	260.8	MALE	#N/A	#N/A
OX382162.1	MSTRG.11075	Osclob_v00_mik.OX382162.1G208.1	MSTRG.11075.30	Osclob_v00_mik.OX382162.1G208	215	149	0	580	0	0	64	429	1290	236	356.6	MALE	#N/A	#N/A
OX382162.1	MSTRG.11075	Osclob_v00_mik.OX382162.1G208.1	MSTRG.11075.31	Osclob_v00_mik.OX382162.1G208	0	0	772	0	0	191	0	0	0	193	38.2	MALE	#N/A	#N/A
OX382162.1	MSTRG.11075	Osclob_v00_mik.OX382162.1G209.1	MSTRG.11075.1	Osclob_v00_mik.OX382162.1G209	0	0	0	0	4	3	106	32	1	0	29.2	MALE	1613700	TORSO_BOMMOTyrosine-protein kinase receptor torso OS=Bombyx mori OX=7091 GN=tor PE=1 SV=1
OX382162.1	MSTRG.11075	Osclob_v00_mik.OX382162.1G209.1	MSTRG.11075.2	Osclob_v00_mik.OX382162.1G209	0	918	0	980	48	4020	1397	13289	6953	474.5	5141.4	MALE	1613700	TORSO_BOMMOTyrosine-protein kinase receptor torso OS=Bombyx mori OX=7091 GN=tor PE=1 SV=1
OX382162.1	MSTRG.11075	Osclob_v00_mik.OX382162.1G209.1	MSTRG.11075.3	Osclob_v00_mik.OX382162.1G209	0	0	116	0	0	0	0	4110	0	29	822	MALE	1613700	TORSO_BOMMOTyrosine-protein kinase receptor torso OS=Bombyx mori OX=7091 GN=tor PE=1 SV=1
OX382162.1	MSTRG.11075	Osclob_v00_mik.OX382162.1G209.1	MSTRG.11075.4	Osclob_v00_mik.OX382162.1G209	74	106	596	63	129	517	0	44	48	209.75	147.6	MALE	1613700	TORSO_BOMMOTyrosine-protein kinase receptor torso OS=Bombyx mori OX=7091 GN=tor PE=1 SV=1
OX382162.1	MSTRG.11075	Osclob_v00_mik.OX382162.1G209.1	MSTRG.11075.5	Osclob_v00_mik.OX382162.1G209	124	31	3	14	112	346	1	63	64	43	117.2	MALE	1613700	TORSO_BOMMOTyrosine-protein kinase receptor torso OS=Bombyx mori OX=7091 GN=tor PE=1 SV=1
OX382162.1	MSTRG.11075	Osclob_v00_mik.OX382162.1G209.1	MSTRG.11075.6	Osclob_v00_mik.OX382162.1G209	0	2	2265	431	0	1596	873	0	7833	674.5	2060.4	MALE	1613700	TORSO_BOMMOTyrosine-protein kinase receptor torso OS=Bombyx mori OX=7091 GN=tor PE=1 SV=1
OX382162.1	MSTRG.11075	Osclob_v00_mik.OX382162.1G209.1	MSTRG.11075.7	Osclob_v00_mik.OX382162.1G209	5072	0	0	2	10528	32	86	0	0	1268.5	2129.2	MALE	1613700	TORSO_BOMMOTyrosine-protein kinase receptor torso OS=Bombyx mori OX=7091 GN=tor PE=1 SV=1
OX382162.1	MSTRG.11075	Osclob_v00_mik.OX382162.1G209.1	MSTRG.11075.8	Osclob_v00_mik.OX382162.1G209	0	0	76	163	236	0	0	54	0	59.75	58	MALE	1613700	TORSO_BOMMOTyrosine-protein kinase receptor torso OS=Bombyx mori OX=7091 GN=tor PE=1 SV=1
OX382162.1	MSTRG.11075	Osclob_v00_mik.OX382162.1G209.1	MSTRG.11075.11	Osclob_v00_mik.OX382162.1G209	23	263	241	0	16	135	3	0	19	131.75	34.6	MALE	1613700	TORSO_BOMMOTyrosine-protein kinase receptor torso OS=Bombyx mori OX=7091 GN=tor PE=1 SV=1
OX382162.1	MSTRG.11075	Osclob_v00_mik.OX382162.1G209.1	MSTRG.11075.13	Osclob_v00_mik.OX382162.1G209	3	2	1	0	3	4	10	3	1	1.5	4.2	MALE	1613700	TORSO_BOMMOTyrosine-protein kinase receptor torso OS=Bombyx mori OX=7091 GN=tor PE=1 SV=1
OX382162.1	MSTRG.11075	Osclob_v00_mik.OX382162.1G209.1	MSTRG.11075.14	Osclob_v00_mik.OX382162.1G209	0	0	0	78	123	417	0	3	202	19.5	149	MALE	1613700	TORSO_BOMMOTyrosine-protein kinase receptor torso OS=Bombyx mori OX=7091 GN=tor PE=1 SV=1
OX382162.1	MSTRG.11075	Osclob_v00_mik.OX382162.1G209.1	MSTRG.11075.15	Osclob_v00_mik.OX382162.1G209	971	0	1497	175	3087	1647	11	1693	697	660.75	1427	MALE	1613700	TORSO_BOMMOTyrosine-protein kinase receptor torso OS=Bombyx mori OX=7091 GN=tor PE=1 SV=1
OX382162.1	MSTRG.11075	Osclob_v00_mik.OX382162.1G209.1	MSTRG.11075.16	Osclob_v00_mik.OX382162.1G209	0	33	0	0	0	0	0	31	1979	8.25	402	MALE	1613700	TORSO_BOMMOTyrosine-protein kinase receptor torso OS=Bombyx mori OX=7091 GN=tor PE=1 SV=1
OX382162.1	MSTRG.11075	Osclob_v00_mik.OX382162.1G209.1	MSTRG.11075.17	Osclob_v00_mik.OX382162.1G209	109	249	0	0	122	41	70	262	2205	89.5	540	MALE	1613700	TORSO_BOMMOTyrosine-protein kinase receptor torso OS=Bombyx mori OX=7091 GN=tor PE=1 SV=1
OX382162.1	MSTRG.11075	Osclob_v00_mik.OX382162.1G209.1	MSTRG.11075.18	Osclob_v00_mik.OX382162.1G209	0	181	636	309	0	0	0	0	602	281.5	120.4	MALE	1613700	TORSO_BOMMOTyrosine-protein kinase receptor torso OS=Bombyx mori OX=7091 GN=tor PE=1 SV=1
OX382162.1	MSTRG.11075	Osclob_v00_mik.OX382162.1G209.1	MSTRG.11075.19	Osclob_v00_mik.OX382162.1G209	0	11	159	0	0	0	0	0	0	42.5	0	MALE	1613700	TORSO_BOMMOTyrosine-protein kinase receptor torso OS=Bombyx mori OX=7091 GN=tor PE=1 SV=1
OX382162.1	MSTRG.11075	Osclob_v00_mik.OX382162.1G209.1	MSTRG.11075.21	Osclob_v00_mik.OX382162.1G209	0	10	0	0	1319	0	0	779	1826	2.5	784.8	MALE	1613700	TORSO_BOMMOTyrosine-protein kinase receptor torso OS=Bombyx mori OX=7091 GN=tor PE=1 SV=1
OX382162.1	MSTRG.11075	Osclob_v00_mik.OX382162.1G209.1	MSTRG.11075.24	Osclob_v00_mik.OX382162.1G209	1969	581	25	149	385	643	1008	564	531	681	626.2	MALE	1613700	TORSO_BOMMOTyrosine-protein kinase receptor torso OS=Bombyx mori OX=7091 GN=tor PE=1 SV=1
OX382162.1	MSTRG.11075	Osclob_v00_mik.OX382162.1G209.1	MSTRG.11075.25	Osclob_v00_mik.OX382162.1G209	0	600	2875	30	2920	363	136	696	722	876.25	967.4	MALE	1613700	TORSO_BOMMOTyrosine-protein kinase receptor torso OS=Bombyx mori OX=7091 GN=tor PE=1 SV=1
OX382162.1	MSTRG.11075	Osclob_v00_mik.OX382162.1G209.1	MSTRG.11075.26	Osclob_v00_mik.OX382162.1G209	0	0	0	0	1592	0	0	4310	0	0	1180.4	MALE	1613700	TORSO_BOMMOTyrosine-protein kinase receptor torso OS=Bombyx mori OX=7091 GN=tor PE=1 SV=1
OX382162.1	MSTRG.11075	Osclob_v00_mik.OX382162.1G209.1	MSTRG.11075.27	Osclob_v00_mik.OX382162.1G209	200	0	831	0	0	0	0	0	1304	257.75	260.8	MALE	1613700	TORSO_BOMMOTyrosine-protein kinase receptor torso OS=Bombyx mori OX=7091 GN=tor PE=1 SV=1
OX382162.1	MSTRG.11075	Osclob_v00_mik.OX382162.1G209.1	MSTRG.11075.30	Osclob_v00_mik.OX382162.1G209	215	149	0	580	0	0	64	429	1290	236	356.6	MALE	1613700	TORSO_BOMMOTyrosine-protein kinase receptor torso OS=Bombyx mori OX=7091 GN=tor PE=1 SV=1
OX382162.1	MSTRG.11075	Osclob_v00_mik.OX382162.1G209.1	MSTRG.11075.31	Osclob_v00_mik.OX382162.1G209	0	0	772	0	0	191	0	0	0	193	38.2	MALE	1613700	TORSO_BOMMOTyrosine-protein kinase receptor torso OS=Bombyx mori OX=7091 GN=tor PE=1 SV=1
OX382162.1	MSTRG.11075	Osclob_v00_mik.OX382162.1G209.1	MSTRG.11075.34	Osclob_v00_mik.OX382162.1G209	11	69	6	18	0	17	0	4	34	26	11	MALE	1613700	TORSO_BOMMOTyrosine-protein kinase receptor torso OS=Bombyx mori OX=7091 GN=tor PE=1 SV=1
OX382162.1	MSTRG.11087	Osclob_v00_mik.OX382162.1G259.1	MSTRG.11087.1	Osclob_v00_mik.OX382162.1G259	0	0	0	398	0	241	81	90	55	99.5	93.4	MALE	1712399	-
OX382162.1	MSTRG.11087	Osclob_v00_mik.OX382162.1G259.1	MSTRG.11087.3	Osclob_v00_mik.OX382162.1G259	315	165	446	470	0	167	0	468	330	349	193	MALE	1712399	-
OX382162.1	MSTRG.11087	Osclob_v00_mik.OX382162.1G259.1	MSTRG.11087.4	Osclob_v00_mik.OX382162.1G259	0	40	1	250	0	0	0	0	30	72.75	6	MALE	1712399	-
OX382162.1	MSTRG.11087	Osclob_v00_mik.OX382162.1G259.1	MSTRG.11087.5	Osclob_v00_mik.OX382162.1G259	13	0	95	115	280	92	288	0	0	55.75	132	MALE	1712399	-
OX382162.1	MSTRG.11087	Osclob_v00_mik.OX382162.1G263.1	MSTRG.11087.1	Osclob_v00_mik.OX382162.1G263	0	0	0	398	0	241	81	90	55	99.5	93.4	MALE	#N/A	#N/A
OX382162.1	MSTRG.11087	Osclob_v00_mik.OX382162.1G263.1	MSTRG.11087.3	Osclob_v00_mik.OX382162.1G263	315	165	446	470	0	167	0	468	330	349	193	MALE	#N/A	#N/A
OX382162.1	MSTRG.11087	Osclob_v00_mik.OX382162.1G263.1	MSTRG.11087.4	Osclob_v00_mik.OX382162.1G263	0	40	1	250	0	0	0	0	30	72.75	6	MALE	#N/A	#N/A
OX382162.1	MSTRG.11087	Osclob_v00_mik.OX382162.1G263.1	MSTRG.11087.5	Osclob_v00_mik.OX382162.1G263	13	0	95	115	280	92	288	0	0	55.75	132	MALE	#N/A	#N/A
OX382162.1	MSTRG.11320	Osclob_v00_mik.OX382162.1G509.1	MSTRG.11320.1	Osclob_v00_mik.OX382162.1G509	3433	2012	2028	5272	6636	5428	2462	5706	5380	3186.25	5122.4	MALE	#N/A	#N/A
OX382162.1	MSTRG.11370	Osclob_v00_mik.OX382162.1G568.1	MSTRG.11370.1	Osclob_v00_mik.OX382162.1G568	8576	5741	13303	7724	13404	16655	13203	19850	27041	8836	18030.6	MALE	1358175	M3K20_HUMANMitogen-activated protein kinase kinase kinase 20 OS=Homo sapiens OX=9606 GN=MAP3K20 PE=1 SV=3
OX382162.1	MSTRG.11370	Osclob_v00_mik.OX382162.1G568.1	MSTRG.11370.3	Osclob_v00_mik.OX382162.1G568	77	0	11	0	385	0	132	14	33	22	112.8	MALE	1358175	M3K20_HUMANMitogen-activated protein kinase kinase kinase 20 OS=Homo sapiens OX=9606 GN=MAP3K20 PE=1 SV=3
OX382162.1	MSTRG.11370	Osclob_v00_mik.OX382162.1G568.1	MSTRG.11370.4	Osclob_v00_mik.OX382162.1G568	0	0	0	0	7222	0	0	3113	0	0	2067	MALE	1358175	M3K20_HUMANMitogen-activated protein kinase kinase kinase 20 OS=Homo sapiens OX=9606 GN=MAP3K20 PE=1 SV=3
OX382162.1	MSTRG.11370	Osclob_v00_mik.OX382162.1G568.1	MSTRG.11370.5	Osclob_v00_mik.OX382162.1G568	6109	4390	440	559	300	0	30	0	1142	2874.5	294.4	MALE	1358175	M3K20_HUMANMitogen-activated protein kinase kinase kinase 20 OS=Homo sapiens OX=9606 GN=MAP3K20 PE=1 SV=3
OX382162.1	MSTRG.11370	Osclob_v00_mik.OX382162.1G568.1	MSTRG.11370.6	Osclob_v00_mik.OX382162.1G568	285	222	850	999	5388	13346	7003	596	510	589	5368.6	MALE	1358175	M3K20_HUMANMitogen-activated protein kinase kinase kinase 20 OS=Homo sapiens OX=9606 GN=MAP3K20 PE=1 SV=3
OX382162.1	MSTRG.11370	Osclob_v00_mik.OX382162.1G568.1	MSTRG.11370.8	Osclob_v00_mik.OX382162.1G568	0	0	0	2492	5236	0	0	3346	0	623	1716.4	MALE	1358175	M3K20_HUMANMitogen-activated protein kinase kinase kinase 20 OS=Homo sapiens OX=9606 GN=MAP3K20 PE=1 SV=3
OX382162.1	MSTRG.11370	Osclob_v00_mik.OX382162.1G568.1	MSTRG.11370.10	Osclob_v00_mik.OX382162.1G568	0	0	0	0	17	0	56	8	0	0	16.2	MALE	1358175	M3K20_HUMANMitogen-activated protein kinase kinase kinase 20 OS=Homo sapiens OX=9606 GN=MAP3K20 PE=1 SV=3
OX382162.1	MSTRG.11370	Osclob_v00_mik.OX382162.1G568.1	MSTRG.11370.12	Osclob_v00_mik.OX382162.1G568	9	0	0	0	29	0	276	6	0	2.25	62.2	MALE	1358175	M3K20_HUMANMitogen-activated protein kinase kinase kinase 20 OS=Homo sapiens OX=9606 GN=MAP3K20 PE=1 SV=3
OX382162.1	MSTRG.11370	Osclob_v00_mik.OX382162.1G568.1	MSTRG.11370.14	Osclob_v00_mik.OX382162.1G568	0	0	0	21	572	95	0	2544	0	5.25	642.2	MALE	1358175	M3K20_HUMANMitogen-activated protein kinase kinase kinase 20 OS=Homo sapiens OX=9606 GN=MAP3K20 PE=1 SV=3
OX382162.1	MSTRG.11370	Osclob_v00_mik.OX382162.1G568.1	MSTRG.11370.15	Osclob_v00_mik.OX382162.1G568	0	0	0	0	369	1	1	10	0	0	76.2	MALE	1358175	M3K20_HUMANMitogen-activated protein kinase kinase kinase 20 OS=Homo sapiens OX=9606 GN=MAP3K20 PE=1 SV=3
OX382162.1	MSTRG.11370	Osclob_v00_mik.OX382162.1G569.1	MSTRG.11370.1	Osclob_v00_mik.OX382162.1G569	8576	5741	13303	7724	13404	16655	13203	19850	27041	8836	18030.6	MALE	#N/A	#N/A
OX382162.1	MSTRG.11370	Osclob_v00_mik.OX382162.1G569.1	MSTRG.11370.3	Osclob_v00_mik.OX382162.1G569	77	0	11	0	385	0	132	14	33	22	112.8	MALE	#N/A	#N/A
OX382162.1	MSTRG.11370	Osclob_v00_mik.OX382162.1G569.1	MSTRG.11370.4	Osclob_v00_mik.OX382162.1G569	0	0	0	0	7222	0	0	3113	0	0	2067	MALE	#N/A	#N/A
OX382162.1	MSTRG.11370	Osclob_v00_mik.OX382162.1G569.1	MSTRG.11370.5	Osclob_v00_mik.OX382162.1G569	6109	4390	440	559	300	0	30	0	1142	2874.5	294.4	MALE	#N/A	#N/A
OX382162.1	MSTRG.11370	Osclob_v00_mik.OX382162.1G569.1	MSTRG.11370.6	Osclob_v00_mik.OX382162.1G569	285	222	850	999	5388	13346	7003	596	510	589	5368.6	MALE	#N/A	#N/A
OX382162.1	MSTRG.11370	Osclob_v00_mik.OX382162.1G569.1	MSTRG.11370.8	Osclob_v00_mik.OX382162.1G569	0	0	0	2492	5236	0	0	3346	0	623	1716.4	MALE	#N/A	#N/A
OX382162.1	MSTRG.11370	Osclob_v00_mik.OX382162.1G569.1	MSTRG.11370.10	Osclob_v00_mik.OX382162.1G569	0	0	0	0	17	0	56	8	0	0	16.2	MALE	#N/A	#N/A
OX382162.1	MSTRG.11370	Osclob_v00_mik.OX382162.1G569.1	MSTRG.11370.12	Osclob_v00_mik.OX382162.1G569	9	0	0	0	29	0	276	6	0	2.25	62.2	MALE	#N/A	#N/A
OX382162.1	MSTRG.11370	Osclob_v00_mik.OX382162.1G569.1	MSTRG.11370.14	Osclob_v00_mik.OX382162.1G569	0	0	0	21	572	95	0	2544	0	5.25	642.2	MALE	#N/A	#N/A
OX382162.1	MSTRG.11413	Osclob_v00_mik.OX382162.1G596.1	MSTRG.11413.1	Osclob_v00_mik.OX382162.1G596	47927	15365	37459	37620	104294	57930	39989	66079	15537	34592.8	56765.8	MALE	2026407	TSP2_MOUSEThrombospondin-2 OS=Mus musculus OX=10090 GN=Thbs2 PE=1 SV=2
OX382162.1	MSTRG.11413	Osclob_v00_mik.OX382162.1G596.1	MSTRG.11413.2	Osclob_v00_mik.OX382162.1G596	68	0	307	0	0	1152	26	0	14	93.75	238.4	MALE	2026407	TSP2_MOUSEThrombospondin-2 OS=Mus musculus OX=10090 GN=Thbs2 PE=1 SV=2
OX382162.1	MSTRG.11413	Osclob_v00_mik.OX382162.1G596.1	MSTRG.11413.4	Osclob_v00_mik.OX382162.1G596	4	0	0	0	340	1578	0	173	2	1	418.6	MALE	2026407	TSP2_MOUSEThrombospondin-2 OS=Mus musculus OX=10090 GN=Thbs2 PE=1 SV=2
OX382162.1	MSTRG.11413	Osclob_v00_mik.OX382162.1G596.1	MSTRG.11413.5	Osclob_v00_mik.OX382162.1G596	129	0	57	55	120	87	92	211	0	60.25	102	MALE	2026407	TSP2_MOUSEThrombospondin-2 OS=Mus musculus OX=10090 GN=Thbs2 PE=1 SV=2
OX382162.1	MSTRG.11413	Osclob_v00_mik.OX382162.1G596.1	MSTRG.11413.8	Osclob_v00_mik.OX382162.1G596	6193	227	930	510	575	251	712	1049	1406	1965	798.6	MALE	2026407	TSP2_MOUSEThrombospondin-2 OS=Mus musculus OX=10090 GN=Thbs2 PE=1 SV=2
OX382162.1	MSTRG.11413	Osclob_v00_mik.OX382162.1G596.1	MSTRG.11413.9	Osclob_v00_mik.OX382162.1G596	5171	22	646	0	290	108	0	634	3553	1459.75	917	MALE	2026407	TSP2_MOUSEThrombospondin-2 OS=Mus musculus OX=10090 GN=Thbs2 PE=1 SV=2
OX382162.1	MSTRG.11413	Osclob_v00_mik.OX382162.1G596.1	MSTRG.11413.10	Osclob_v00_mik.OX382162.1G596	16	469	158	268	86	8	0	93	0	227.75	37.4	MALE	2026407	TSP2_MOUSEThrombospondin-2 OS=Mus musculus OX=10090 GN=Thbs2 PE=1 SV=2
OX382162.1	MSTRG.11413	Osclob_v00_mik.OX382162.1G596.1	MSTRG.11413.11	Osclob_v00_mik.OX382162.1G596	1	1393	0	0	0	0	0	0	19093	348.5	3818.6	MALE	2026407	TSP2_MOUSEThrombospondin-2 OS=Mus musculus OX=10090 GN=Thbs2 PE=1 SV=2
OX382162.1	MSTRG.11413	Osclob_v00_mik.OX382162.1G596.1	MSTRG.11413.12	Osclob_v00_mik.OX382162.1G596	0	3472	0	0	0	0	0	16249	7032	868	4656.2	MALE	2026407	TSP2_MOUSEThrombospondin-2 OS=Mus musculus OX=10090 GN=Thbs2 PE=1 SV=2
OX382163.1	MSTRG.11487	Osclob_v00_mik.OX382163.1G24.2	MSTRG.11487.1	Osclob_v00_mik.OX382163.1G24	0	0	0	3	0	1	0	1	0	0.75	0.4	MALE	3527826	KPEL_DROMESerine/threonine-protein kinase pelle OS=Drosophila melanogaster OX=7227 GN=pll PE=1 SV=1
OX382163.1	MSTRG.11487	Osclob_v00_mik.OX382163.1G24.2	MSTRG.11487.2	Osclob_v00_mik.OX382163.1G24	0	0	16	7	217	1	118	974	513	5.75	364.6	MALE	3527826	KPEL_DROMESerine/threonine-protein kinase pelle OS=Drosophila melanogaster OX=7227 GN=pll PE=1 SV=1
OX382163.1	MSTRG.11487	Osclob_v00_mik.OX382163.1G24.2	MSTRG.11487.3	Osclob_v00_mik.OX382163.1G24	2016	513	1950	1171	5601	845	1035	2176	439	1412.5	2019.2	MALE	3527826	KPEL_DROMESerine/threonine-protein kinase pelle OS=Drosophila melanogaster OX=7227 GN=pll PE=1 SV=1
OX382163.1	MSTRG.11487	Osclob_v00_mik.OX382163.1G24.2	MSTRG.11487.4	Osclob_v00_mik.OX382163.1G24	88	0	17	270	141	0	123	48	0	93.75	62.4	MALE	3527826	KPEL_DROMESerine/threonine-protein kinase pelle OS=Drosophila melanogaster OX=7227 GN=pll PE=1 SV=1
OX382163.1	MSTRG.11487	Osclob_v00_mik.OX382163.1G24.2	MSTRG.11487.6	Osclob_v00_mik.OX382163.1G24	114	146	289	337	42	0	129	999	0	221.5	234	MALE	3527826	KPEL_DROMESerine/threonine-protein kinase pelle OS=Drosophila melanogaster OX=7227 GN=pll PE=1 SV=1
OX382163.1	MSTRG.11487	Osclob_v00_mik.OX382163.1G24.2	MSTRG.11487.7	Osclob_v00_mik.OX382163.1G24	131	0	338	664	92	0	6	1025	0	283.25	224.6	MALE	3527826	KPEL_DROMESerine/threonine-protein kinase pelle OS=Drosophila melanogaster OX=7227 GN=pll PE=1 SV=1
OX382163.1	MSTRG.11487	Osclob_v00_mik.OX382163.1G24.2	MSTRG.11487.8	Osclob_v00_mik.OX382163.1G24	81	0	147	154	51	0	0	155	0	95.5	41.2	MALE	3527826	KPEL_DROMESerine/threonine-protein kinase pelle OS=Drosophila melanogaster OX=7227 GN=pll PE=1 SV=1
OX382163.1	MSTRG.11487	Osclob_v00_mik.OX382163.1G24.2	MSTRG.11487.9	Osclob_v00_mik.OX382163.1G24	93	0	156	318	132	0	1	296	0	141.75	85.8	MALE	3527826	KPEL_DROMESerine/threonine-protein kinase pelle OS=Drosophila melanogaster OX=7227 GN=pll PE=1 SV=1
OX382163.1	MSTRG.11667	Osclob_v00_mik.OX382163.1G279.1	MSTRG.11667.1	Osclob_v00_mik.OX382163.1G279	28286	3685	862	47695	18184	48809	2800	24298	2490	20132	19316.2	MALE	2027128	PKHL1_MOUSEFibrocystin-L OS=Mus musculus OX=10090 GN=Pkhd1l1 PE=1 SV=1
OX382163.1	MSTRG.11739	Osclob_v00_mik.OX382163.1G245.1	MSTRG.11739.1	Osclob_v00_mik.OX382163.1G245	541	3137	311	1079	3940	14385	941	1995	10462	1267	6344.6	MALE	2046187	TSP2_MOUSEThrombospondin-2 OS=Mus musculus OX=10090 GN=Thbs2 PE=1 SV=2
OX382163.1	MSTRG.11739	Osclob_v00_mik.OX382163.1G245.1	MSTRG.11739.2	Osclob_v00_mik.OX382163.1G245	574	0	4143	0	15334	0	0	5883	6727	1179.25	5588.8	MALE	2046187	TSP2_MOUSEThrombospondin-2 OS=Mus musculus OX=10090 GN=Thbs2 PE=1 SV=2
OX382163.1	MSTRG.11739	Osclob_v00_mik.OX382163.1G245.1	MSTRG.11739.3	Osclob_v00_mik.OX382163.1G245	0	0	0	6256	0	0	0	0	0	1564	0	MALE	2046187	TSP2_MOUSEThrombospondin-2 OS=Mus musculus OX=10090 GN=Thbs2 PE=1 SV=2
OX382163.1	MSTRG.11739	Osclob_v00_mik.OX382163.1G245.1	MSTRG.11739.4	Osclob_v00_mik.OX382163.1G245	0	0	0	4185	0	0	0	0	0	1046.25	0	MALE	2046187	TSP2_MOUSEThrombospondin-2 OS=Mus musculus OX=10090 GN=Thbs2 PE=1 SV=2
OX382163.1	MSTRG.11739	Osclob_v00_mik.OX382163.1G245.1	MSTRG.11739.5	Osclob_v00_mik.OX382163.1G245	6333	1881	5218	0	0	71	1667	4816	1898	3358	1690.4	MALE	2046187	TSP2_MOUSEThrombospondin-2 OS=Mus musculus OX=10090 GN=Thbs2 PE=1 SV=2
OX382163.1	MSTRG.11739	Osclob_v00_mik.OX382163.1G245.1	MSTRG.11739.6	Osclob_v00_mik.OX382163.1G245	3952	0	6515	2000	1402	4369	0	544	3661	3116.75	1995.2	MALE	2046187	TSP2_MOUSEThrombospondin-2 OS=Mus musculus OX=10090 GN=Thbs2 PE=1 SV=2
OX382163.1	MSTRG.11739	Osclob_v00_mik.OX382163.1G245.1	MSTRG.11739.7	Osclob_v00_mik.OX382163.1G245	1532	497	398	0	0	0	0	66	448	606.75	102.8	MALE	2046187	TSP2_MOUSEThrombospondin-2 OS=Mus musculus OX=10090 GN=Thbs2 PE=1 SV=2
OX382163.1	MSTRG.11739	Osclob_v00_mik.OX382163.1G245.1	MSTRG.11739.8	Osclob_v00_mik.OX382163.1G245	29	331	0	468	16	330	0	89	93	207	105.6	MALE	2046187	TSP2_MOUSEThrombospondin-2 OS=Mus musculus OX=10090 GN=Thbs2 PE=1 SV=2
OX382163.1	MSTRG.11739	Osclob_v00_mik.OX382163.1G245.1	MSTRG.11739.10	Osclob_v00_mik.OX382163.1G245	2902	693	4268	148	3686	1718	0	4469	10141	2002.75	4002.8	MALE	2046187	TSP2_MOUSEThrombospondin-2 OS=Mus musculus OX=10090 GN=Thbs2 PE=1 SV=2
OX382163.1	MSTRG.11739	Osclob_v00_mik.OX382163.1G245.1	MSTRG.11739.11	Osclob_v00_mik.OX382163.1G245	0	0	0	0	175	0	0	299	132	0	121.2	MALE	2046187	TSP2_MOUSEThrombospondin-2 OS=Mus musculus OX=10090 GN=Thbs2 PE=1 SV=2
OX382163.1	MSTRG.11739	Osclob_v00_mik.OX382163.1G245.1	MSTRG.11739.12	Osclob_v00_mik.OX382163.1G245	1053	393	236	3488	0	355	62	0	754	1292.5	234.2	MALE	2046187	TSP2_MOUSEThrombospondin-2 OS=Mus musculus OX=10090 GN=Thbs2 PE=1 SV=2
OX382163.1	MSTRG.11739	Osclob_v00_mik.OX382163.1G245.1	MSTRG.11739.15	Osclob_v00_mik.OX382163.1G245	7092	2771	10490	0	1781	37850	3110	1005	29	5088.25	8755	MALE	2046187	TSP2_MOUSEThrombospondin-2 OS=Mus musculus OX=10090 GN=Thbs2 PE=1 SV=2
OX382163.1	MSTRG.11739	Osclob_v00_mik.OX382163.1G245.1	MSTRG.11739.16	Osclob_v00_mik.OX382163.1G245	1	1	1	0	2171	0	0	2571	1067	0.75	1161.8	MALE	2046187	TSP2_MOUSEThrombospondin-2 OS=Mus musculus OX=10090 GN=Thbs2 PE=1 SV=2
OX382163.1	MSTRG.11739	Osclob_v00_mik.OX382163.1G245.1	MSTRG.11739.17	Osclob_v00_mik.OX382163.1G245	279	12	14	0	506	614	675	462	25	76.25	456.4	MALE	2046187	TSP2_MOUSEThrombospondin-2 OS=Mus musculus OX=10090 GN=Thbs2 PE=1 SV=2
OX382163.1	MSTRG.11739	Osclob_v00_mik.OX382163.1G245.1	MSTRG.11739.19	Osclob_v00_mik.OX382163.1G245	25417	11825	4544	160	26299	3632	11002	108715	45736	10486.5	39076.8	MALE	2046187	TSP2_MOUSEThrombospondin-2 OS=Mus musculus OX=10090 GN=Thbs2 PE=1 SV=2
OX382163.1	MSTRG.11739	Osclob_v00_mik.OX382163.1G245.1	MSTRG.11739.20	Osclob_v00_mik.OX382163.1G245	8024	11	184	72820	2654	313	539	8731	46240	20259.8	11695.4	MALE	2046187	TSP2_MOUSEThrombospondin-2 OS=Mus musculus OX=10090 GN=Thbs2 PE=1 SV=2
OX382163.1	MSTRG.11739	Osclob_v00_mik.OX382163.1G245.1	MSTRG.11739.21	Osclob_v00_mik.OX382163.1G245	32197	18337	30204	865	72388	3146	25	2967	5761	20400.8	16857.4	MALE	2046187	TSP2_MOUSEThrombospondin-2 OS=Mus musculus OX=10090 GN=Thbs2 PE=1 SV=2
OX382163.1	MSTRG.11739	Osclob_v00_mik.OX382163.1G245.1	MSTRG.11739.22	Osclob_v00_mik.OX382163.1G245	109455	1788	3714	0	255	67300	13556	193	1055	28739.2	16471.8	MALE	2046187	TSP2_MOUSEThrombospondin-2 OS=Mus musculus OX=10090 GN=Thbs2 PE=1 SV=2
OX382163.1	MSTRG.11739	Osclob_v00_mik.OX382163.1G245.1	MSTRG.11739.24	Osclob_v00_mik.OX382163.1G245	10098	70578	4	16	4	183	0	2	48	20174	47.4	MALE	2046187	TSP2_MOUSEThrombospondin-2 OS=Mus musculus OX=10090 GN=Thbs2 PE=1 SV=2
OX382163.1	MSTRG.11739	Osclob_v00_mik.OX382163.1G245.1	MSTRG.11739.25	Osclob_v00_mik.OX382163.1G245	0	95	4	0	0	0	17980	0	0	24.75	3596	MALE	2046187	TSP2_MOUSEThrombospondin-2 OS=Mus musculus OX=10090 GN=Thbs2 PE=1 SV=2
OX382163.1	MSTRG.11739	Osclob_v00_mik.OX382163.1G245.1	MSTRG.11739.26	Osclob_v00_mik.OX382163.1G245	6	99	0	0	185	21	22901	279	216	26.25	4720.4	MALE	2046187	TSP2_MOUSEThrombospondin-2 OS=Mus musculus OX=10090 GN=Thbs2 PE=1 SV=2
OX382163.1	MSTRG.11739	Osclob_v00_mik.OX382163.1G245.1	MSTRG.11739.27	Osclob_v00_mik.OX382163.1G245	4	6	0	0	32	6	202	93	3	2.5	67.2	MALE	2046187	TSP2_MOUSEThrombospondin-2 OS=Mus musculus OX=10090 GN=Thbs2 PE=1 SV=2
OX382163.1	MSTRG.11768	Osclob_v00_mik.OX382163.1G325.1	MSTRG.11768.1	Osclob_v00_mik.OX382163.1G325	0	1	1	5	104	163	53	13	54	1.75	77.4	MALE	2259267	-
OX382163.1	MSTRG.11768	Osclob_v00_mik.OX382163.1G325.1	MSTRG.11768.2	Osclob_v00_mik.OX382163.1G325	7467	6596	5568	7495	21120	6170	4364	9580	10252	6781.5	10297.2	MALE	2259267	-
OX382163.1	MSTRG.11768	Osclob_v00_mik.OX382163.1G325.1	MSTRG.11768.3	Osclob_v00_mik.OX382163.1G325	3077	1155	8261	2212	5649	29067	22625	4032	18774	3676.25	16029.4	MALE	2259267	-
OX382163.1	MSTRG.11768	Osclob_v00_mik.OX382163.1G325.1	MSTRG.11768.5	Osclob_v00_mik.OX382163.1G325	162	0	0	1	5027	0	0	22616	60	40.75	5540.6	MALE	2259267	-
OX382163.1	MSTRG.11768	Osclob_v00_mik.OX382163.1G325.1	MSTRG.11768.7	Osclob_v00_mik.OX382163.1G325	3635	303	0	962	1134	3	9	172	640	1225	391.6	MALE	2259267	-
OX382163.1	MSTRG.11768	Osclob_v00_mik.OX382163.1G325.1	MSTRG.11768.8	Osclob_v00_mik.OX382163.1G325	2565	3341	2491	273	12737	2187	50	2011	2501	2167.5	3897.2	MALE	2259267	-
OX382163.1	MSTRG.11768	Osclob_v00_mik.OX382163.1G325.1	MSTRG.11768.9	Osclob_v00_mik.OX382163.1G325	3	0	65	1	0	0	199	0	192	17.25	78.2	MALE	2259267	-
OX382163.1	MSTRG.11805	Osclob_v00_mik.OX382163.1G340.1	MSTRG.11805.1	Osclob_v00_mik.OX382163.1G340	6115	2700	1418	20605	0	5910	0	0	2	7709.5	1182.4	MALE	2312698	FARP2_HUMANFERM, ARHGEF and pleckstrin domain-containing protein 2 OS=Homo sapiens OX=9606 GN=FARP2 PE=1 SV=3
OX382163.1	MSTRG.11805	Osclob_v00_mik.OX382163.1G340.1	MSTRG.11805.2	Osclob_v00_mik.OX382163.1G340	5602	0	0	0	0	0	0	0	0	1400.5	0	MALE	2312698	FARP2_HUMANFERM, ARHGEF and pleckstrin domain-containing protein 2 OS=Homo sapiens OX=9606 GN=FARP2 PE=1 SV=3
OX382163.1	MSTRG.11805	Osclob_v00_mik.OX382163.1G340.1	MSTRG.11805.3	Osclob_v00_mik.OX382163.1G340	8769	601	14412	18958	0	13	0	138	92	10685	48.6	MALE	2312698	FARP2_HUMANFERM, ARHGEF and pleckstrin domain-containing protein 2 OS=Homo sapiens OX=9606 GN=FARP2 PE=1 SV=3
OX382163.1	MSTRG.11805	Osclob_v00_mik.OX382163.1G340.1	MSTRG.11805.4	Osclob_v00_mik.OX382163.1G340	6768	157	11452	22622	0	111	0	11	8	10249.8	26	MALE	2312698	FARP2_HUMANFERM, ARHGEF and pleckstrin domain-containing protein 2 OS=Homo sapiens OX=9606 GN=FARP2 PE=1 SV=3
OX382163.1	MSTRG.11805	Osclob_v00_mik.OX382163.1G340.1	MSTRG.11805.5	Osclob_v00_mik.OX382163.1G340	58587	43666	82840	56271	65189	204021	26272	63888	50496	60341	81973.2	MALE	2312698	FARP2_HUMANFERM, ARHGEF and pleckstrin domain-containing protein 2 OS=Homo sapiens OX=9606 GN=FARP2 PE=1 SV=3
OX382163.1	MSTRG.11805	Osclob_v00_mik.OX382163.1G340.1	MSTRG.11805.6	Osclob_v00_mik.OX382163.1G340	2173	0	0	0	0	0	0	0	0	543.25	0	MALE	2312698	FARP2_HUMANFERM, ARHGEF and pleckstrin domain-containing protein 2 OS=Homo sapiens OX=9606 GN=FARP2 PE=1 SV=3
OX382163.1	MSTRG.11805	Osclob_v00_mik.OX382163.1G340.1	MSTRG.11805.7	Osclob_v00_mik.OX382163.1G340	402	1011	1084	4657	149	16329	148	150	255	1788.5	3406.2	MALE	2312698	FARP2_HUMANFERM, ARHGEF and pleckstrin domain-containing protein 2 OS=Homo sapiens OX=9606 GN=FARP2 PE=1 SV=3
OX382163.1	MSTRG.11805	Osclob_v00_mik.OX382163.1G340.1	MSTRG.11805.8	Osclob_v00_mik.OX382163.1G340	9800	2449	10484	20507	476	49644	0	539	717	10810	10275.2	MALE	2312698	FARP2_HUMANFERM, ARHGEF and pleckstrin domain-containing protein 2 OS=Homo sapiens OX=9606 GN=FARP2 PE=1 SV=3
OX382163.1	MSTRG.11805	Osclob_v00_mik.OX382163.1G340.1	MSTRG.11805.9	Osclob_v00_mik.OX382163.1G340	1477	2378	1758	9569	820	35011	479	241	146	3795.5	7339.4	MALE	2312698	FARP2_HUMANFERM, ARHGEF and pleckstrin domain-containing protein 2 OS=Homo sapiens OX=9606 GN=FARP2 PE=1 SV=3
OX382163.1	MSTRG.11805	Osclob_v00_mik.OX382163.1G340.1	MSTRG.11805.10	Osclob_v00_mik.OX382163.1G340	327734	33454	197951	395985	4746	189897	7211	12665	20482	238781	47000.2	MALE	2312698	FARP2_HUMANFERM, ARHGEF and pleckstrin domain-containing protein 2 OS=Homo sapiens OX=9606 GN=FARP2 PE=1 SV=3
OX382163.1	MSTRG.11805	Osclob_v00_mik.OX382163.1G340.1	MSTRG.11805.11	Osclob_v00_mik.OX382163.1G340	0	0	0	38746	0	0	0	0	0	9686.5	0	MALE	2312698	FARP2_HUMANFERM, ARHGEF and pleckstrin domain-containing protein 2 OS=Homo sapiens OX=9606 GN=FARP2 PE=1 SV=3
OX382163.1	MSTRG.11805	Osclob_v00_mik.OX382163.1G340.1	MSTRG.11805.12	Osclob_v00_mik.OX382163.1G340	4058	787	1881	6493	85	61450	0	1640	1731	3304.75	12981.2	MALE	2312698	FARP2_HUMANFERM, ARHGEF and pleckstrin domain-containing protein 2 OS=Homo sapiens OX=9606 GN=FARP2 PE=1 SV=3
OX382163.1	MSTRG.11805	Osclob_v00_mik.OX382163.1G340.1	MSTRG.11805.13	Osclob_v00_mik.OX382163.1G340	17600	4792	21294	20961	0	0	0	43	585	16161.8	125.6	MALE	2312698	FARP2_HUMANFERM, ARHGEF and pleckstrin domain-containing protein 2 OS=Homo sapiens OX=9606 GN=FARP2 PE=1 SV=3
OX382163.1	MSTRG.11805	Osclob_v00_mik.OX382163.1G340.1	MSTRG.11805.14	Osclob_v00_mik.OX382163.1G340	5182	125	1856	5250	452	7405	38	231	1380	3103.25	1901.2	MALE	2312698	FARP2_HUMANFERM, ARHGEF and pleckstrin domain-containing protein 2 OS=Homo sapiens OX=9606 GN=FARP2 PE=1 SV=3
OX382163.1	MSTRG.11805	Osclob_v00_mik.OX382163.1G340.1	MSTRG.11805.16	Osclob_v00_mik.OX382163.1G340	7	485	30	5926	0	4716	575	0	0	1612	1058.2	MALE	2312698	FARP2_HUMANFERM, ARHGEF and pleckstrin domain-containing protein 2 OS=Homo sapiens OX=9606 GN=FARP2 PE=1 SV=3
OX382163.1	MSTRG.11805	Osclob_v00_mik.OX382163.1G340.1	MSTRG.11805.17	Osclob_v00_mik.OX382163.1G340	0	0	0	0	0	0	162	0	0	0	32.4	MALE	2312698	FARP2_HUMANFERM, ARHGEF and pleckstrin domain-containing protein 2 OS=Homo sapiens OX=9606 GN=FARP2 PE=1 SV=3
OX382163.1	MSTRG.11805	Osclob_v00_mik.OX382163.1G340.1	MSTRG.11805.21	Osclob_v00_mik.OX382163.1G340	205	662	3858	0	2497	0	0	3852	0	1181.25	1269.8	MALE	2312698	FARP2_HUMANFERM, ARHGEF and pleckstrin domain-containing protein 2 OS=Homo sapiens OX=9606 GN=FARP2 PE=1 SV=3
OX382163.1	MSTRG.11805	Osclob_v00_mik.OX382163.1G340.1	MSTRG.11805.22	Osclob_v00_mik.OX382163.1G340	0	0	0	0	0	0	0	0	15158	0	3031.6	MALE	2312698	FARP2_HUMANFERM, ARHGEF and pleckstrin domain-containing protein 2 OS=Homo sapiens OX=9606 GN=FARP2 PE=1 SV=3
OX382163.1	MSTRG.11812	Osclob_v00_mik.OX382163.1G354.1	MSTRG.11812.1	Osclob_v00_mik.OX382163.1G354	91	247	362	3916	6357	6256	2781	2043	1341	1154	3755.6	MALE	#N/A	#N/A
OX382163.1	MSTRG.11812	Osclob_v00_mik.OX382163.1G354.1	MSTRG.11812.3	Osclob_v00_mik.OX382163.1G354	4119	3079	1724	10	5175	1122	1079	7051	11239	2233	5133.2	MALE	#N/A	#N/A
OX382163.1	MSTRG.11812	Osclob_v00_mik.OX382163.1G354.1	MSTRG.11812.4	Osclob_v00_mik.OX382163.1G354	4	0	0	11	26	0	0	0	0	3.75	5.2	MALE	#N/A	#N/A
OX382163.1	MSTRG.11812	Osclob_v00_mik.OX382163.1G354.1	MSTRG.11812.5	Osclob_v00_mik.OX382163.1G354	0	2	1665	0	0	56	0	21	59	416.75	27.2	MALE	#N/A	#N/A
OX382163.1	MSTRG.11812	Osclob_v00_mik.OX382163.1G354.1	MSTRG.11812.7	Osclob_v00_mik.OX382163.1G354	389	616	136	1708	2253	1796	478	1201	516	712.25	1248.8	MALE	#N/A	#N/A
OX382163.1	MSTRG.11828	Osclob_v00_mik.OX382163.1G375.2	MSTRG.11828.1	Osclob_v00_mik.OX382163.1G375	3699	3785	2002	20511	3110	47048	5039	3237	2479	7499.25	12182.6	MALE	#N/A	#N/A
OX382163.1	MSTRG.11828	Osclob_v00_mik.OX382163.1G375.2	MSTRG.11828.2	Osclob_v00_mik.OX382163.1G375	0	0	10722	1530	0	1008	0	0	0	3063	201.6	MALE	#N/A	#N/A
OX382163.1	MSTRG.11828	Osclob_v00_mik.OX382163.1G375.2	MSTRG.11828.3	Osclob_v00_mik.OX382163.1G375	0	635	1661	0	2324	0	0	0	1057	574	676.2	MALE	#N/A	#N/A
OX382163.1	MSTRG.11828	Osclob_v00_mik.OX382163.1G375.2	MSTRG.11828.4	Osclob_v00_mik.OX382163.1G375	16778	0	6775	0	56437	3116	0	11534	99610	5888.25	34139.4	MALE	#N/A	#N/A
OX382163.1	MSTRG.11828	Osclob_v00_mik.OX382163.1G375.2	MSTRG.11828.6	Osclob_v00_mik.OX382163.1G375	462	2238	2369	0	2350	362	1	629	428	1267.25	754	MALE	#N/A	#N/A
OX382163.1	MSTRG.11828	Osclob_v00_mik.OX382163.1G375.2	MSTRG.11828.7	Osclob_v00_mik.OX382163.1G375	6303	0	1693	0	2388	0	0	14525	3602	1999	4103	MALE	#N/A	#N/A
OX382163.1	MSTRG.11828	Osclob_v00_mik.OX382163.1G375.2	MSTRG.11828.8	Osclob_v00_mik.OX382163.1G375	754	0	0	0	0	0	0	0	482	188.5	96.4	MALE	#N/A	#N/A
OX382163.1	MSTRG.11828	Osclob_v00_mik.OX382163.1G375.2	MSTRG.11828.9	Osclob_v00_mik.OX382163.1G375	809	0	2139	317	2191	0	461	559	540	816.25	750.2	MALE	#N/A	#N/A
OX382163.1	MSTRG.11828	Osclob_v00_mik.OX382163.1G375.2	MSTRG.11828.10	Osclob_v00_mik.OX382163.1G375	3198	0	1718	0	2579	0	0	16248	2360	1229	4237.4	MALE	#N/A	#N/A
OX382163.1	MSTRG.11828	Osclob_v00_mik.OX382163.1G375.2	MSTRG.11828.11	Osclob_v00_mik.OX382163.1G375	0	0	392	0	0	0	0	0	0	98	0	MALE	#N/A	#N/A
OX382163.1	MSTRG.11854	Osclob_v00_mik.OX382163.1G403.1	MSTRG.11854.1	Osclob_v00_mik.OX382163.1G403	2922	2890	5146	3381	8471	7554	3674	8780	6666	3584.75	7029	MALE	#N/A	#N/A
OX382163.1	MSTRG.11854	Osclob_v00_mik.OX382163.1G403.1	MSTRG.11854.4	Osclob_v00_mik.OX382163.1G403	576	780	510	228	409	1935	519	697	940	523.5	900	MALE	#N/A	#N/A
OX382163.1	MSTRG.11854	Osclob_v00_mik.OX382163.1G404.1	MSTRG.11854.1	Osclob_v00_mik.OX382163.1G404	2922	2890	5146	3381	8471	7554	3674	8780	6666	3584.75	7029	MALE	#N/A	#N/A
OX382163.1	MSTRG.11854	Osclob_v00_mik.OX382163.1G404.1	MSTRG.11854.4	Osclob_v00_mik.OX382163.1G404	576	780	510	228	409	1935	519	697	940	523.5	900	MALE	#N/A	#N/A
OX382163.1	MSTRG.11869	Osclob_v00_mik.OX382163.1G422.1	MSTRG.11869.1	Osclob_v00_mik.OX382163.1G422	76	56	42	185	599	128	11	157	68	89.75	192.6	MALE	3269444	-
OX382163.1	MSTRG.11869	Osclob_v00_mik.OX382163.1G422.1	MSTRG.11869.3	Osclob_v00_mik.OX382163.1G422	5341	3235	6557	4919	3973	9509	2761	6385	4746	5013	5474.8	MALE	3269444	-
OX382163.1	MSTRG.11869	Osclob_v00_mik.OX382163.1G422.1	MSTRG.11869.6	Osclob_v00_mik.OX382163.1G422	110	18	23	40	0	170	99	140	13	47.75	84.4	MALE	3269444	-
OX382163.1	MSTRG.11869	Osclob_v00_mik.OX382163.1G423.1	MSTRG.11869.1	Osclob_v00_mik.OX382163.1G423	76	56	42	185	599	128	11	157	68	89.75	192.6	MALE	#N/A	#N/A
OX382163.1	MSTRG.11869	Osclob_v00_mik.OX382163.1G423.1	MSTRG.11869.3	Osclob_v00_mik.OX382163.1G423	5341	3235	6557	4919	3973	9509	2761	6385	4746	5013	5474.8	MALE	#N/A	#N/A
OX382163.1	MSTRG.11869	Osclob_v00_mik.OX382163.1G423.1	MSTRG.11869.6	Osclob_v00_mik.OX382163.1G423	110	18	23	40	0	170	99	140	13	47.75	84.4	MALE	#N/A	#N/A
OX382163.1	MSTRG.11900	Osclob_v00_mik.OX382163.1G461.1	MSTRG.11900.1	Osclob_v00_mik.OX382163.1G461	43530	35358	109215	38507	124216	66072	53115	106290	49146	56652.5	79767.8	MALE	987003	DZI1L_RATCilium assembly protein DZIP1L OS=Rattus norvegicus OX=10116 GN=Dzip1l PE=1 SV=1
OX382163.1	MSTRG.11900	Osclob_v00_mik.OX382163.1G461.1	MSTRG.11900.3	Osclob_v00_mik.OX382163.1G461	2	0	10337	1	7165	0	1300	6436	95	2585	2999.2	MALE	987003	DZI1L_RATCilium assembly protein DZIP1L OS=Rattus norvegicus OX=10116 GN=Dzip1l PE=1 SV=1
OX382163.1	MSTRG.11900	Osclob_v00_mik.OX382163.1G461.1	MSTRG.11900.4	Osclob_v00_mik.OX382163.1G461	0	0	0	0	0	0	0	16983	0	0	3396.6	MALE	987003	DZI1L_RATCilium assembly protein DZIP1L OS=Rattus norvegicus OX=10116 GN=Dzip1l PE=1 SV=1
OX382163.1	MSTRG.11900	Osclob_v00_mik.OX382163.1G461.1	MSTRG.11900.7	Osclob_v00_mik.OX382163.1G461	0	0	23	100	544	30	0	72	142	30.75	157.6	MALE	987003	DZI1L_RATCilium assembly protein DZIP1L OS=Rattus norvegicus OX=10116 GN=Dzip1l PE=1 SV=1
OX382163.1	MSTRG.11900	Osclob_v00_mik.OX382163.1G461.1	MSTRG.11900.8	Osclob_v00_mik.OX382163.1G461	920	0	363	183	2259	2019	8	2129	2387	366.5	1760.4	MALE	987003	DZI1L_RATCilium assembly protein DZIP1L OS=Rattus norvegicus OX=10116 GN=Dzip1l PE=1 SV=1
OX382163.1	MSTRG.11900	Osclob_v00_mik.OX382163.1G461.1	MSTRG.11900.9	Osclob_v00_mik.OX382163.1G461	0	0	23	106	524	30	30	60	114	32.25	151.6	MALE	987003	DZI1L_RATCilium assembly protein DZIP1L OS=Rattus norvegicus OX=10116 GN=Dzip1l PE=1 SV=1
OX382163.1	MSTRG.11926	Osclob_v00_mik.OX382163.1G489.1	MSTRG.11926.1	Osclob_v00_mik.OX382163.1G489	366	1005	115	688	1108	445	2081	75	290	543.5	799.8	MALE	#N/A	#N/A
OX382163.1	MSTRG.11926	Osclob_v00_mik.OX382163.1G489.1	MSTRG.11926.2	Osclob_v00_mik.OX382163.1G489	169	107	180	161	158	727	625	742	155	154.25	481.4	MALE	#N/A	#N/A
OX382163.1	MSTRG.11926	Osclob_v00_mik.OX382163.1G489.1	MSTRG.11926.3	Osclob_v00_mik.OX382163.1G489	81	118	208	14	60	2	109	31	138	105.25	68	MALE	#N/A	#N/A
OX382163.1	MSTRG.11926	Osclob_v00_mik.OX382163.1G489.1	MSTRG.11926.4	Osclob_v00_mik.OX382163.1G489	0	0	0	0	872	0	0	319	0	0	238.2	MALE	#N/A	#N/A
OX382163.1	MSTRG.11926	Osclob_v00_mik.OX382163.1G489.1	MSTRG.11926.6	Osclob_v00_mik.OX382163.1G489	0	0	0	0	0	0	0	24	0	0	4.8	MALE	#N/A	#N/A
OX382163.1	MSTRG.11998	Osclob_v00_mik.OX382163.1G547.1	MSTRG.11998.1	Osclob_v00_mik.OX382163.1G547	0	488	96	0	770	9	143	472	0	146	278.8	MALE	2532246	RS10B_BOVINRadial spoke head 10 homolog B OS=Bos taurus OX=9913 GN=RSPH10B PE=2 SV=2
OX382163.1	MSTRG.11998	Osclob_v00_mik.OX382163.1G547.1	MSTRG.11998.2	Osclob_v00_mik.OX382163.1G547	4370	4440	19053	2701	11685	12353	9151	16138	4720	7641	10809.4	MALE	2532246	RS10B_BOVINRadial spoke head 10 homolog B OS=Bos taurus OX=9913 GN=RSPH10B PE=2 SV=2
OX382163.1	MSTRG.11998	Osclob_v00_mik.OX382163.1G547.1	MSTRG.11998.3	Osclob_v00_mik.OX382163.1G547	0	2	2	1	4	0	232	2	790	1.25	205.6	MALE	2532246	RS10B_BOVINRadial spoke head 10 homolog B OS=Bos taurus OX=9913 GN=RSPH10B PE=2 SV=2
OX382163.1	MSTRG.11998	Osclob_v00_mik.OX382163.1G547.1	MSTRG.11998.4	Osclob_v00_mik.OX382163.1G547	0	56	88	0	28	25	8	20	0	36	16.2	MALE	2532246	RS10B_BOVINRadial spoke head 10 homolog B OS=Bos taurus OX=9913 GN=RSPH10B PE=2 SV=2
OX382163.1	MSTRG.11998	Osclob_v00_mik.OX382163.1G547.1	MSTRG.11998.6	Osclob_v00_mik.OX382163.1G547	4942	0	4577	2921	0	0	0	522	478	3110	200	MALE	2532246	RS10B_BOVINRadial spoke head 10 homolog B OS=Bos taurus OX=9913 GN=RSPH10B PE=2 SV=2
OX382163.1	MSTRG.11998	Osclob_v00_mik.OX382163.1G547.1	MSTRG.11998.7	Osclob_v00_mik.OX382163.1G547	4104	7595	5477	12340	54247	34667	17886	31620	31106	7379	33905.2	MALE	2532246	RS10B_BOVINRadial spoke head 10 homolog B OS=Bos taurus OX=9913 GN=RSPH10B PE=2 SV=2
OX382163.1	MSTRG.11998	Osclob_v00_mik.OX382163.1G547.1	MSTRG.11998.9	Osclob_v00_mik.OX382163.1G547	9737	1988	8853	2937	1030	2479	1535	5781	1654	5878.75	2495.8	MALE	2532246	RS10B_BOVINRadial spoke head 10 homolog B OS=Bos taurus OX=9913 GN=RSPH10B PE=2 SV=2
OX382164.1	MSTRG.12124	Osclob_v00_mik.OX382164.1G137.1	MSTRG.12124.1	Osclob_v00_mik.OX382164.1G137	1739	2636	2540	4853	12476	6938	7394	12472	9744	2942	9804.8	MALE	1809298	RBGPR_MOUSERab3 GTPase-activating protein non-catalytic subunit OS=Mus musculus OX=10090 GN=Rab3gap2 PE=1 SV=2
OX382164.1	MSTRG.12124	Osclob_v00_mik.OX382164.1G137.1	MSTRG.12124.3	Osclob_v00_mik.OX382164.1G137	0	53	66	0	0	68	0	0	0	29.75	13.6	MALE	1809298	RBGPR_MOUSERab3 GTPase-activating protein non-catalytic subunit OS=Mus musculus OX=10090 GN=Rab3gap2 PE=1 SV=2
OX382164.1	MSTRG.12124	Osclob_v00_mik.OX382164.1G137.1	MSTRG.12124.4	Osclob_v00_mik.OX382164.1G137	1664	187	1293	9	395	2905	41	173	1355	788.25	973.8	MALE	1809298	RBGPR_MOUSERab3 GTPase-activating protein non-catalytic subunit OS=Mus musculus OX=10090 GN=Rab3gap2 PE=1 SV=2
OX382164.1	MSTRG.12124	Osclob_v00_mik.OX382164.1G137.1	MSTRG.12124.6	Osclob_v00_mik.OX382164.1G137	140	1	4	0	67	9	18	48	287	36.25	85.8	MALE	1809298	RBGPR_MOUSERab3 GTPase-activating protein non-catalytic subunit OS=Mus musculus OX=10090 GN=Rab3gap2 PE=1 SV=2
OX382164.1	MSTRG.12172	Osclob_v00_mik.OX382164.1G194.1	MSTRG.12172.2	Osclob_v00_mik.OX382164.1G194	0	15	2	0	2	0	13	4	4	4.25	4.6	MALE	2168700	DYH1_MOUSEDynein axonemal heavy chain 1 OS=Mus musculus OX=10090 GN=Dnah1 PE=1 SV=1
OX382164.1	MSTRG.12231	Osclob_v00_mik.OX382164.1G258.1	MSTRG.12231.1	Osclob_v00_mik.OX382164.1G258	17866	319	192	11638	5603	185	307	7455	129	7503.75	2735.8	MALE	1464935	ZNFX1_MOUSENFX1-type zinc finger-containing protein 1 OS=Mus musculus OX=10090 GN=Znfx1 PE=1 SV=3
OX382164.1	MSTRG.12231	Osclob_v00_mik.OX382164.1G258.1	MSTRG.12231.2	Osclob_v00_mik.OX382164.1G258	0	7431	7051	230	0	13342	4203	0	11893	3678	5887.6	MALE	1464935	ZNFX1_MOUSENFX1-type zinc finger-containing protein 1 OS=Mus musculus OX=10090 GN=Znfx1 PE=1 SV=3
OX382164.1	MSTRG.12242	Osclob_v00_mik.OX382164.1G295.1	MSTRG.12242.1	Osclob_v00_mik.OX382164.1G295	988	1263	1805	1801	1976	2411	2607	3912	5539	1464.25	3289	MALE	2450763	M3K7L_DROMEPutative mitogen-activated protein kinase kinase kinase 7-like OS=Drosophila melanogaster OX=7227 GN=Takl1 PE=2 SV=1
OX382164.1	MSTRG.12242	Osclob_v00_mik.OX382164.1G295.1	MSTRG.12242.2	Osclob_v00_mik.OX382164.1G295	112	0	73	389	0	0	218	99	621	143.5	187.6	MALE	2450763	M3K7L_DROMEPutative mitogen-activated protein kinase kinase kinase 7-like OS=Drosophila melanogaster OX=7227 GN=Takl1 PE=2 SV=1
OX382164.1	MSTRG.12242	Osclob_v00_mik.OX382164.1G295.1	MSTRG.12242.3	Osclob_v00_mik.OX382164.1G295	0	0	0	0	0	0	0	2095	0	0	419	MALE	2450763	M3K7L_DROMEPutative mitogen-activated protein kinase kinase kinase 7-like OS=Drosophila melanogaster OX=7227 GN=Takl1 PE=2 SV=1
OX382164.1	MSTRG.12242	Osclob_v00_mik.OX382164.1G295.1	MSTRG.12242.4	Osclob_v00_mik.OX382164.1G295	347	0	381	2	1606	411	1	1026	212	182.5	651.2	MALE	2450763	M3K7L_DROMEPutative mitogen-activated protein kinase kinase kinase 7-like OS=Drosophila melanogaster OX=7227 GN=Takl1 PE=2 SV=1
OX382164.1	MSTRG.12242	Osclob_v00_mik.OX382164.1G295.1	MSTRG.12242.7	Osclob_v00_mik.OX382164.1G295	337	451	559	325	1331	411	1087	1397	1234	418	1092	MALE	2450763	M3K7L_DROMEPutative mitogen-activated protein kinase kinase kinase 7-like OS=Drosophila melanogaster OX=7227 GN=Takl1 PE=2 SV=1
OX382164.1	MSTRG.12242	Osclob_v00_mik.OX382164.1G295.1	MSTRG.12242.9	Osclob_v00_mik.OX382164.1G295	622	515	516	14	846	572	832	590	0	416.75	568	MALE	2450763	M3K7L_DROMEPutative mitogen-activated protein kinase kinase kinase 7-like OS=Drosophila melanogaster OX=7227 GN=Takl1 PE=2 SV=1
OX382164.1	MSTRG.12242	Osclob_v00_mik.OX382164.1G295.1	MSTRG.12242.10	Osclob_v00_mik.OX382164.1G295	49	0	96	316	299	0	0	618	848	115.25	353	MALE	2450763	M3K7L_DROMEPutative mitogen-activated protein kinase kinase kinase 7-like OS=Drosophila melanogaster OX=7227 GN=Takl1 PE=2 SV=1
OX382164.1	MSTRG.12242	Osclob_v00_mik.OX382164.1G295.1	MSTRG.12242.11	Osclob_v00_mik.OX382164.1G295	0	0	10	0	0	1	0	1	426	2.5	85.6	MALE	2450763	M3K7L_DROMEPutative mitogen-activated protein kinase kinase kinase 7-like OS=Drosophila melanogaster OX=7227 GN=Takl1 PE=2 SV=1
OX382164.1	MSTRG.12242	Osclob_v00_mik.OX382164.1G295.1	MSTRG.12242.12	Osclob_v00_mik.OX382164.1G295	8	104	2	125	463	142	172	401	250	59.75	285.6	MALE	2450763	M3K7L_DROMEPutative mitogen-activated protein kinase kinase kinase 7-like OS=Drosophila melanogaster OX=7227 GN=Takl1 PE=2 SV=1
OX382164.1	MSTRG.12297	Osclob_v00_mik.OX382164.1G273.1	MSTRG.12297.1	Osclob_v00_mik.OX382164.1G273	961	688	385	605	1552	2616	562	1193	6934	659.75	2571.4	MALE	#N/A	#N/A
OX382164.1	MSTRG.12297	Osclob_v00_mik.OX382164.1G273.1	MSTRG.12297.2	Osclob_v00_mik.OX382164.1G273	2537	1251	5992	1457	4943	3841	1971	2637	11255	2809.25	4929.4	MALE	#N/A	#N/A
OX382164.1	MSTRG.12297	Osclob_v00_mik.OX382164.1G273.1	MSTRG.12297.3	Osclob_v00_mik.OX382164.1G273	82	0	1041	0	1528	0	0	3271	6033	280.75	2166.4	MALE	#N/A	#N/A
OX382164.1	MSTRG.12297	Osclob_v00_mik.OX382164.1G273.1	MSTRG.12297.8	Osclob_v00_mik.OX382164.1G273	96	0	0	0	0	411	460	83	329	24	256.6	MALE	#N/A	#N/A
OX382164.1	MSTRG.12297	Osclob_v00_mik.OX382164.1G273.1	MSTRG.12297.10	Osclob_v00_mik.OX382164.1G273	1771	261	200	342	3749	276	789	6038	369	643.5	2244.2	MALE	#N/A	#N/A
OX382164.1	MSTRG.12297	Osclob_v00_mik.OX382164.1G273.1	MSTRG.12297.12	Osclob_v00_mik.OX382164.1G273	1	0	8	0	3	5	27	4	2	2.25	8.2	MALE	#N/A	#N/A
OX382164.1	MSTRG.12297	Osclob_v00_mik.OX382164.1G273.1	MSTRG.12297.13	Osclob_v00_mik.OX382164.1G273	0	0	0	0	0	0	0	821	64	0	177	MALE	#N/A	#N/A
OX382164.1	MSTRG.12297	Osclob_v00_mik.OX382164.1G273.1	MSTRG.12297.14	Osclob_v00_mik.OX382164.1G273	536	964	1211	0	0	0	0	55	0	677.75	11	MALE	#N/A	#N/A
OX382164.1	MSTRG.12297	Osclob_v00_mik.OX382164.1G273.1	MSTRG.12297.15	Osclob_v00_mik.OX382164.1G273	191	0	0	0	6	24	0	0	6	47.75	7.2	MALE	#N/A	#N/A
OX382164.1	MSTRG.12297	Osclob_v00_mik.OX382164.1G273.1	MSTRG.12297.16	Osclob_v00_mik.OX382164.1G273	30	0	0	0	0	0	403	40	0	7.5	88.6	MALE	#N/A	#N/A
OX382164.1	MSTRG.12297	Osclob_v00_mik.OX382164.1G273.1	MSTRG.12297.17	Osclob_v00_mik.OX382164.1G273	193	11	94	14	761	358	76	132	17	78	268.8	MALE	#N/A	#N/A
OX382164.1	MSTRG.12308	Osclob_v00_mik.OX382164.1G285.1	MSTRG.12308.1	Osclob_v00_mik.OX382164.1G285	3652	185	4503	320	2956	3626	97	3179	2584	2165	2488.4	MALE	#N/A	#N/A
OX382164.1	MSTRG.12308	Osclob_v00_mik.OX382164.1G285.1	MSTRG.12308.4	Osclob_v00_mik.OX382164.1G285	957	0	978	0	0	0	57	0	360	483.75	83.4	MALE	#N/A	#N/A
OX382164.1	MSTRG.12308	Osclob_v00_mik.OX382164.1G285.1	MSTRG.12308.5	Osclob_v00_mik.OX382164.1G285	5331	1004	9670	4827	10788	11358	3621	10755	7669	5208	8838.2	MALE	#N/A	#N/A
OX382164.1	MSTRG.12424	Osclob_v00_mik.OX382164.1G460.1	MSTRG.12424.1	Osclob_v00_mik.OX382164.1G460	249	70	473	43	48	0	20	160	421	208.75	129.8	MALE	#N/A	#N/A
OX382164.1	MSTRG.12424	Osclob_v00_mik.OX382164.1G460.1	MSTRG.12424.3	Osclob_v00_mik.OX382164.1G460	292	0	166	0	421	95	37	438	54	114.5	209	MALE	#N/A	#N/A
OX382164.1	MSTRG.12424	Osclob_v00_mik.OX382164.1G460.1	MSTRG.12424.4	Osclob_v00_mik.OX382164.1G460	0	0	0	0	2977	30	0	1916	2954	0	1575.4	MALE	#N/A	#N/A
OX382164.1	MSTRG.12424	Osclob_v00_mik.OX382164.1G460.1	MSTRG.12424.5	Osclob_v00_mik.OX382164.1G460	1938	0	1262	0	211	1416	0	1001	2047	800	935	MALE	#N/A	#N/A
OX382164.1	MSTRG.12443	Osclob_v00_mik.OX382164.1G466.1	MSTRG.12443.1	Osclob_v00_mik.OX382164.1G466	121	0	167	0	593	201	0	299	0	72	218.6	MALE	2619394	CSK_BOVINTyrosine-protein kinase CSK OS=Bos taurus OX=9913 GN=CSK PE=2 SV=1
OX382164.1	MSTRG.12443	Osclob_v00_mik.OX382164.1G466.1	MSTRG.12443.2	Osclob_v00_mik.OX382164.1G466	1310	151	1655	488	420	603	67	2131	1333	901	910.8	MALE	2619394	CSK_BOVINTyrosine-protein kinase CSK OS=Bos taurus OX=9913 GN=CSK PE=2 SV=1
OX382164.1	MSTRG.12443	Osclob_v00_mik.OX382164.1G466.1	MSTRG.12443.4	Osclob_v00_mik.OX382164.1G466	93	92	558	219	1606	141	11	1197	25	240.5	596	MALE	2619394	CSK_BOVINTyrosine-protein kinase CSK OS=Bos taurus OX=9913 GN=CSK PE=2 SV=1
OX382164.1	MSTRG.12443	Osclob_v00_mik.OX382164.1G466.1	MSTRG.12443.5	Osclob_v00_mik.OX382164.1G466	38	0	314	0	87	398	0	134	0	88	123.8	MALE	2619394	CSK_BOVINTyrosine-protein kinase CSK OS=Bos taurus OX=9913 GN=CSK PE=2 SV=1
OX382164.1	MSTRG.12443	Osclob_v00_mik.OX382164.1G466.1	MSTRG.12443.11	Osclob_v00_mik.OX382164.1G466	0	112	0	0	1415	86	623	0	1386	28	702	MALE	2619394	CSK_BOVINTyrosine-protein kinase CSK OS=Bos taurus OX=9913 GN=CSK PE=2 SV=1
OX382164.1	MSTRG.12453	Osclob_v00_mik.OX382164.1G507.1	MSTRG.12453.1	Osclob_v00_mik.OX382164.1G507	635	1269	1327	1346	2999	3565	1037	3815	4312	1144.25	3145.6	MALE	#N/A	#N/A
OX382164.1	MSTRG.12478	Osclob_v00_mik.OX382164.1G520.1	MSTRG.12478.1	Osclob_v00_mik.OX382164.1G520	39	211	89	707	138	104	75	629	626	261.5	314.4	MALE	1237725	PPR27_HUMANProtein phosphatase 1 regulatory subunit 27 OS=Homo sapiens OX=9606 GN=PPP1R27 PE=1 SV=1
OX382164.1	MSTRG.12478	Osclob_v00_mik.OX382164.1G520.1	MSTRG.12478.2	Osclob_v00_mik.OX382164.1G520	38	0	30	0	886	156	675	0	32	17	349.8	MALE	1237725	PPR27_HUMANProtein phosphatase 1 regulatory subunit 27 OS=Homo sapiens OX=9606 GN=PPP1R27 PE=1 SV=1
OX382164.1	MSTRG.12544	Osclob_v00_mik.OX382164.1G584.1	MSTRG.12544.1	Osclob_v00_mik.OX382164.1G584	7711	1361	294	5949	2695	10464	2773	9025	5143	3828.75	6020	MALE	4118583	DPYS_RATDihydropyrimidinase OS=Rattus norvegicus OX=10116 GN=Dpys PE=1 SV=2
OX382164.1	MSTRG.12544	Osclob_v00_mik.OX382164.1G584.1	MSTRG.12544.3	Osclob_v00_mik.OX382164.1G584	57	389	675	756	209	345	16	119	837	469.25	305.2	MALE	4118583	DPYS_RATDihydropyrimidinase OS=Rattus norvegicus OX=10116 GN=Dpys PE=1 SV=2
OX382164.1	MSTRG.12544	Osclob_v00_mik.OX382164.1G584.1	MSTRG.12544.6	Osclob_v00_mik.OX382164.1G584	257	356	84	43	761	619	499	1746	463	185	817.6	MALE	4118583	DPYS_RATDihydropyrimidinase OS=Rattus norvegicus OX=10116 GN=Dpys PE=1 SV=2
OX382164.1	MSTRG.12544	Osclob_v00_mik.OX382164.1G584.1	MSTRG.12544.7	Osclob_v00_mik.OX382164.1G584	0	53	0	11	910	20	0	115	6	16	210.2	MALE	4118583	DPYS_RATDihydropyrimidinase OS=Rattus norvegicus OX=10116 GN=Dpys PE=1 SV=2
OX382165.1	MSTRG.12806	Osclob_v00_mik.OX382165.1G216.1	MSTRG.12806.1	Osclob_v00_mik.OX382165.1G216	10965	4293	2699	10565	16519	15869	6988	19156	21296	7130.5	15965.6	MALE	#N/A	#N/A
OX382165.1	MSTRG.12806	Osclob_v00_mik.OX382165.1G216.1	MSTRG.12806.2	Osclob_v00_mik.OX382165.1G216	270	0	0	662	0	0	0	0	265	233	53	MALE	#N/A	#N/A
OX382165.1	MSTRG.12806	Osclob_v00_mik.OX382165.1G216.1	MSTRG.12806.4	Osclob_v00_mik.OX382165.1G216	0	18	0	0	1639	0	0	6	0	4.5	329	MALE	#N/A	#N/A
OX382165.1	MSTRG.12806	Osclob_v00_mik.OX382165.1G216.1	MSTRG.12806.7	Osclob_v00_mik.OX382165.1G216	96	0	2330	311	3886	0	0	166	258	684.25	862	MALE	#N/A	#N/A
OX382165.1	MSTRG.12928	Osclob_v00_mik.OX382165.1G351.1	MSTRG.12928.1	Osclob_v00_mik.OX382165.1G351	22625	18023	41327	82162	71959	95191	43196	41301	14687	41034.2	53266.8	MALE	#N/A	#N/A
OX382165.1	MSTRG.12928	Osclob_v00_mik.OX382165.1G351.1	MSTRG.12928.2	Osclob_v00_mik.OX382165.1G351	6564	6282	9085	7212	416	7260	773	1452	5137	7285.75	3007.6	MALE	#N/A	#N/A
OX382165.1	MSTRG.12963	Osclob_v00_mik.OX382165.1G419.1	MSTRG.12963.1	Osclob_v00_mik.OX382165.1G419	3326	3073	3013	3909	7698	6563	4315	6333	5269	3330.25	6035.6	MALE	1650301	-
OX382165.1	MSTRG.12963	Osclob_v00_mik.OX382165.1G419.1	MSTRG.12963.2	Osclob_v00_mik.OX382165.1G419	0	0	0	131	0	0	0	0	0	32.75	0	MALE	1650301	-
OX382165.1	MSTRG.12966	Osclob_v00_mik.OX382165.1G424.1	MSTRG.12966.1	Osclob_v00_mik.OX382165.1G424	202	0	796	1	276	0	0	1744	0	249.75	404	MALE	2407495	-
OX382165.1	MSTRG.12966	Osclob_v00_mik.OX382165.1G424.1	MSTRG.12966.2	Osclob_v00_mik.OX382165.1G424	244	549	92	22	706	405	404	925	255	226.75	539	MALE	2407495	-
OX382165.1	MSTRG.12966	Osclob_v00_mik.OX382165.1G424.1	MSTRG.12966.3	Osclob_v00_mik.OX382165.1G424	0	0	0	0	0	191	0	0	0	0	38.2	MALE	2407495	-
OX382165.1	MSTRG.12986	Osclob_v00_mik.OX382165.1G387.1	MSTRG.12986.1	Osclob_v00_mik.OX382165.1G387	12213	7318	9608	11150	14912	12648	7468	18740	25727	10072.2	15899	MALE	1747923	-
OX382165.1	MSTRG.12986	Osclob_v00_mik.OX382165.1G387.1	MSTRG.12986.4	Osclob_v00_mik.OX382165.1G387	9	1	405	3	3	95	1	0	27	104.5	25.2	MALE	1747923	-
OX382165.1	MSTRG.12986	Osclob_v00_mik.OX382165.1G387.1	MSTRG.12986.8	Osclob_v00_mik.OX382165.1G387	553	300	64	155	45	534	13	35	166	268	158.6	MALE	1747923	-
OX382165.1	MSTRG.13023	Osclob_v00_mik.OX382165.1G452.1	MSTRG.13023.1	Osclob_v00_mik.OX382165.1G452	0	44	135	75	415	235	30	498	219	63.5	279.4	MALE	#N/A	#N/A
OX382165.1	MSTRG.13025	Osclob_v00_mik.OX382165.1G453.1	MSTRG.13025.1	Osclob_v00_mik.OX382165.1G453	465	264	190	66	528	0	964	0	130	246.25	324.4	MALE	#N/A	#N/A
OX382165.1	MSTRG.13025	Osclob_v00_mik.OX382165.1G453.1	MSTRG.13025.3	Osclob_v00_mik.OX382165.1G453	1192	90	31	250	822	0	45	81	0	390.75	189.6	MALE	#N/A	#N/A
OX382165.1	MSTRG.13025	Osclob_v00_mik.OX382165.1G453.1	MSTRG.13025.4	Osclob_v00_mik.OX382165.1G453	1315	43	0	151	75	0	0	0	0	377.25	15	MALE	#N/A	#N/A
OX382165.1	MSTRG.13025	Osclob_v00_mik.OX382165.1G453.1	MSTRG.13025.5	Osclob_v00_mik.OX382165.1G453	74	10	107	60	243	132	3	211	226	62.75	163	MALE	#N/A	#N/A
OX382165.1	MSTRG.13025	Osclob_v00_mik.OX382165.1G453.1	MSTRG.13025.6	Osclob_v00_mik.OX382165.1G453	14	3	2033	1359	4322	4	3	4978	1292	852.25	2119.8	MALE	#N/A	#N/A
OX382165.1	MSTRG.13025	Osclob_v00_mik.OX382165.1G454.1	MSTRG.13025.1	Osclob_v00_mik.OX382165.1G454	465	264	190	66	528	0	964	0	130	246.25	324.4	MALE	#N/A	#N/A
OX382165.1	MSTRG.13025	Osclob_v00_mik.OX382165.1G454.1	MSTRG.13025.3	Osclob_v00_mik.OX382165.1G454	1192	90	31	250	822	0	45	81	0	390.75	189.6	MALE	#N/A	#N/A
OX382165.1	MSTRG.13025	Osclob_v00_mik.OX382165.1G454.1	MSTRG.13025.4	Osclob_v00_mik.OX382165.1G454	1315	43	0	151	75	0	0	0	0	377.25	15	MALE	#N/A	#N/A
OX382165.1	MSTRG.13025	Osclob_v00_mik.OX382165.1G454.1	MSTRG.13025.5	Osclob_v00_mik.OX382165.1G454	74	10	107	60	243	132	3	211	226	62.75	163	MALE	#N/A	#N/A
OX382165.1	MSTRG.13025	Osclob_v00_mik.OX382165.1G456.1	MSTRG.13025.1	Osclob_v00_mik.OX382165.1G456	465	264	190	66	528	0	964	0	130	246.25	324.4	MALE	1390985	LZIC_MOUSEProtein LZIC OS=Mus musculus OX=10090 GN=Lzic PE=1 SV=1
OX382165.1	MSTRG.13025	Osclob_v00_mik.OX382165.1G456.1	MSTRG.13025.3	Osclob_v00_mik.OX382165.1G456	1192	90	31	250	822	0	45	81	0	390.75	189.6	MALE	1390985	LZIC_MOUSEProtein LZIC OS=Mus musculus OX=10090 GN=Lzic PE=1 SV=1
OX382165.1	MSTRG.13025	Osclob_v00_mik.OX382165.1G456.1	MSTRG.13025.4	Osclob_v00_mik.OX382165.1G456	1315	43	0	151	75	0	0	0	0	377.25	15	MALE	1390985	LZIC_MOUSEProtein LZIC OS=Mus musculus OX=10090 GN=Lzic PE=1 SV=1
OX382165.1	MSTRG.13025	Osclob_v00_mik.OX382165.1G456.1	MSTRG.13025.5	Osclob_v00_mik.OX382165.1G456	74	10	107	60	243	132	3	211	226	62.75	163	MALE	1390985	LZIC_MOUSEProtein LZIC OS=Mus musculus OX=10090 GN=Lzic PE=1 SV=1
OX382165.1	MSTRG.13025	Osclob_v00_mik.OX382165.1G456.1	MSTRG.13025.6	Osclob_v00_mik.OX382165.1G456	14	3	2033	1359	4322	4	3	4978	1292	852.25	2119.8	MALE	1390985	LZIC_MOUSEProtein LZIC OS=Mus musculus OX=10090 GN=Lzic PE=1 SV=1
OX382165.1	MSTRG.13025	Osclob_v00_mik.OX382165.1G456.1	MSTRG.13025.7	Osclob_v00_mik.OX382165.1G456	997	1567	19	1220	322	3449	1735	1179	239	950.75	1384.8	MALE	1390985	LZIC_MOUSEProtein LZIC OS=Mus musculus OX=10090 GN=Lzic PE=1 SV=1
OX382165.1	MSTRG.13025	Osclob_v00_mik.OX382165.1G456.1	MSTRG.13025.8	Osclob_v00_mik.OX382165.1G456	31	0	0	0	0	73	0	175	25	7.75	54.6	MALE	1390985	LZIC_MOUSEProtein LZIC OS=Mus musculus OX=10090 GN=Lzic PE=1 SV=1
OX382165.1	MSTRG.13025	Osclob_v00_mik.OX382165.1G456.1	MSTRG.13025.9	Osclob_v00_mik.OX382165.1G456	98	1316	112	0	78	0	0	36	1126	381.5	248	MALE	1390985	LZIC_MOUSEProtein LZIC OS=Mus musculus OX=10090 GN=Lzic PE=1 SV=1
OX382165.1	MSTRG.13025	Osclob_v00_mik.OX382165.1G456.1	MSTRG.13025.10	Osclob_v00_mik.OX382165.1G456	49	0	0	0	2	0	334	0	0	12.25	67.2	MALE	1390985	LZIC_MOUSEProtein LZIC OS=Mus musculus OX=10090 GN=Lzic PE=1 SV=1
OX382165.1	MSTRG.13025	Osclob_v00_mik.OX382165.1G456.1	MSTRG.13025.11	Osclob_v00_mik.OX382165.1G456	73	2223	1016	0	92	3101	2314	1268	1097	828	1574.4	MALE	1390985	LZIC_MOUSEProtein LZIC OS=Mus musculus OX=10090 GN=Lzic PE=1 SV=1
OX382165.1	MSTRG.13025	Osclob_v00_mik.OX382165.1G456.1	MSTRG.13025.12	Osclob_v00_mik.OX382165.1G456	1	40	1	0	0	0	9	0	0	10.5	1.8	MALE	1390985	LZIC_MOUSEProtein LZIC OS=Mus musculus OX=10090 GN=Lzic PE=1 SV=1
OX382165.1	MSTRG.13025	Osclob_v00_mik.OX382165.1G456.1	MSTRG.13025.14	Osclob_v00_mik.OX382165.1G456	0	0	81	0	255	0	0	38	91	20.25	76.8	MALE	1390985	LZIC_MOUSEProtein LZIC OS=Mus musculus OX=10090 GN=Lzic PE=1 SV=1
OX382165.1	MSTRG.13025	Osclob_v00_mik.OX382165.1G456.1	MSTRG.13025.15	Osclob_v00_mik.OX382165.1G456	0	0	0	0	0	1170	0	0	0	0	234	MALE	1390985	LZIC_MOUSEProtein LZIC OS=Mus musculus OX=10090 GN=Lzic PE=1 SV=1
OX382165.1	MSTRG.13025	Osclob_v00_mik.OX382165.1G456.1	MSTRG.13025.18	Osclob_v00_mik.OX382165.1G456	0	28	92	67	331	1084	0	620	575	46.75	522	MALE	1390985	LZIC_MOUSEProtein LZIC OS=Mus musculus OX=10090 GN=Lzic PE=1 SV=1
OX382165.1	MSTRG.13025	Osclob_v00_mik.OX382165.1G456.1	MSTRG.13025.19	Osclob_v00_mik.OX382165.1G456	0	0	774	14	2373	1334	23	899	1761	197	1278	MALE	1390985	LZIC_MOUSEProtein LZIC OS=Mus musculus OX=10090 GN=Lzic PE=1 SV=1
OX382166.1	MSTRG.13118	Osclob_v00_mik.OX382166.1G99.1	MSTRG.13118.1	Osclob_v00_mik.OX382166.1G99	206	152	176	229	192	969	651	449	273	190.75	506.8	MALE	2311357	EYA1_HUMANEyes absent homolog 1 OS=Homo sapiens OX=9606 GN=EYA1 PE=1 SV=2
OX382166.1	MSTRG.13123	Osclob_v00_mik.OX382166.1G105.1	MSTRG.13123.2	Osclob_v00_mik.OX382166.1G105	17	10	25	0	0	23	84	14	13	13	26.8	MALE	#N/A	#N/A
OX382166.1	MSTRG.13138	Osclob_v00_mik.OX382166.1G119.1	MSTRG.13138.1	Osclob_v00_mik.OX382166.1G119	4161	2635	4865	1761	4028	4634	1757	9982	6136	3355.5	5307.4	MALE	2371491	FAK1_CHICKFocal adhesion kinase 1 OS=Gallus gallus OX=9031 GN=PTK2 PE=1 SV=2
OX382166.1	MSTRG.13138	Osclob_v00_mik.OX382166.1G119.1	MSTRG.13138.3	Osclob_v00_mik.OX382166.1G119	14	878	53	12	94	3792	5502	937	6747	239.25	3414.4	MALE	2371491	FAK1_CHICKFocal adhesion kinase 1 OS=Gallus gallus OX=9031 GN=PTK2 PE=1 SV=2
OX382166.1	MSTRG.13138	Osclob_v00_mik.OX382166.1G119.1	MSTRG.13138.4	Osclob_v00_mik.OX382166.1G119	833	0	0	3291	958	0	0	85	0	1031	208.6	MALE	2371491	FAK1_CHICKFocal adhesion kinase 1 OS=Gallus gallus OX=9031 GN=PTK2 PE=1 SV=2
OX382166.1	MSTRG.13145	Osclob_v00_mik.OX382166.1G66.1	MSTRG.13145.1	Osclob_v00_mik.OX382166.1G66	0	0	0	0	0	2469	0	0	0	0	493.8	MALE	#N/A	#N/A
OX382166.1	MSTRG.13145	Osclob_v00_mik.OX382166.1G66.1	MSTRG.13145.2	Osclob_v00_mik.OX382166.1G66	0	0	0	0	0	958	0	0	0	0	191.6	MALE	#N/A	#N/A
OX382166.1	MSTRG.13145	Osclob_v00_mik.OX382166.1G66.1	MSTRG.13145.3	Osclob_v00_mik.OX382166.1G66	0	0	0	0	0	296	0	0	0	0	59.2	MALE	#N/A	#N/A
OX382166.1	MSTRG.13151	Osclob_v00_mik.OX382166.1G72.1	MSTRG.13151.1	Osclob_v00_mik.OX382166.1G72	0	0	0	0	0	0	1	9	88	0	19.6	MALE	#N/A	#N/A
OX382166.1	MSTRG.13373	Osclob_v00_mik.OX382166.1G364.1	MSTRG.13373.1	Osclob_v00_mik.OX382166.1G364	66	0	1327	868	13	1959	121	59	601	565.25	550.6	MALE	#N/A	#N/A
OX382166.1	MSTRG.13373	Osclob_v00_mik.OX382166.1G364.1	MSTRG.13373.2	Osclob_v00_mik.OX382166.1G364	82	2792	3706	4284	179	1788	7	33	1927	2716	786.8	MALE	#N/A	#N/A
OX382166.1	MSTRG.13373	Osclob_v00_mik.OX382166.1G364.1	MSTRG.13373.3	Osclob_v00_mik.OX382166.1G364	1604	891	1263	0	0	213	1	20	81	939.5	63	MALE	#N/A	#N/A
OX382166.1	MSTRG.13373	Osclob_v00_mik.OX382166.1G364.1	MSTRG.13373.4	Osclob_v00_mik.OX382166.1G364	716	371	570	102	0	136	0	0	84	439.75	44	MALE	#N/A	#N/A
OX382166.1	MSTRG.13373	Osclob_v00_mik.OX382166.1G364.1	MSTRG.13373.5	Osclob_v00_mik.OX382166.1G364	3	0	0	0	0	0	0	333	0	0.75	66.6	MALE	#N/A	#N/A
OX382166.1	MSTRG.13373	Osclob_v00_mik.OX382166.1G364.1	MSTRG.13373.6	Osclob_v00_mik.OX382166.1G364	41	0	0	0	49	0	0	1591	15	10.25	331	MALE	#N/A	#N/A
OX382166.1	MSTRG.13373	Osclob_v00_mik.OX382166.1G364.1	MSTRG.13373.7	Osclob_v00_mik.OX382166.1G364	0	327	2573	188	13	51	2593	889	169	772	743	MALE	#N/A	#N/A
OX382166.1	MSTRG.13373	Osclob_v00_mik.OX382166.1G364.1	MSTRG.13373.8	Osclob_v00_mik.OX382166.1G364	0	0	0	0	0	4621	0	0	600	0	1044.2	MALE	#N/A	#N/A
OX382166.1	MSTRG.13373	Osclob_v00_mik.OX382166.1G364.1	MSTRG.13373.9	Osclob_v00_mik.OX382166.1G364	180	0	0	0	0	992	0	64	139	45	239	MALE	#N/A	#N/A
OX382166.1	MSTRG.13373	Osclob_v00_mik.OX382166.1G364.1	MSTRG.13373.10	Osclob_v00_mik.OX382166.1G364	3124	0	0	355	0	4604	16	424	896	869.75	1188	MALE	#N/A	#N/A
OX382166.1	MSTRG.13373	Osclob_v00_mik.OX382166.1G364.1	MSTRG.13373.11	Osclob_v00_mik.OX382166.1G364	120	9	0	0	0	26	0	1393	3	32.25	284.4	MALE	#N/A	#N/A
OX382166.1	MSTRG.13373	Osclob_v00_mik.OX382166.1G364.1	MSTRG.13373.12	Osclob_v00_mik.OX382166.1G364	1	0	0	0	2865	0	0	159	10	0.25	606.8	MALE	#N/A	#N/A
OX382166.1	MSTRG.13373	Osclob_v00_mik.OX382166.1G364.1	MSTRG.13373.13	Osclob_v00_mik.OX382166.1G364	0	0	0	0	4017	0	0	4515	10	0	1708.4	MALE	#N/A	#N/A
OX382166.1	MSTRG.13373	Osclob_v00_mik.OX382166.1G364.1	MSTRG.13373.15	Osclob_v00_mik.OX382166.1G364	231	227	0	0	8	725	0	15	0	114.5	149.6	MALE	#N/A	#N/A
OX382166.1	MSTRG.13441	Osclob_v00_mik.OX382166.1G442.1	MSTRG.13441.2	Osclob_v00_mik.OX382166.1G442	0	12	0	34	19	0	0	15	1	11.5	7	MALE	#N/A	#N/A
OX382166.1	MSTRG.13527	Osclob_v00_mik.OX382166.1G510.1	MSTRG.13527.1	Osclob_v00_mik.OX382166.1G510	150	150	264	177	329	33	86	193	125	185.25	153.2	MALE	#N/A	#N/A
OX382166.1	MSTRG.13527	Osclob_v00_mik.OX382166.1G510.1	MSTRG.13527.2	Osclob_v00_mik.OX382166.1G510	1	4	1	8	3	18	7	0	8	3.5	7.2	MALE	#N/A	#N/A
OX382166.1	MSTRG.13527	Osclob_v00_mik.OX382166.1G510.1	MSTRG.13527.3	Osclob_v00_mik.OX382166.1G510	311	696	227	1696	831	2248	498	1479	1717	732.5	1354.6	MALE	#N/A	#N/A
OX382166.1	MSTRG.13527	Osclob_v00_mik.OX382166.1G510.1	MSTRG.13527.7	Osclob_v00_mik.OX382166.1G510	525	18	619	243	4056	8	36	4265	1142	351.25	1901.4	MALE	#N/A	#N/A
OX382166.1	MSTRG.13527	Osclob_v00_mik.OX382166.1G510.1	MSTRG.13527.8	Osclob_v00_mik.OX382166.1G510	0	0	314	0	7363	0	0	2782	2155	78.5	2460	MALE	#N/A	#N/A
OX382166.1	MSTRG.13527	Osclob_v00_mik.OX382166.1G510.1	MSTRG.13527.9	Osclob_v00_mik.OX382166.1G510	628	55	378	130	4435	175	0	4575	873	297.75	2011.6	MALE	#N/A	#N/A
OX382167.1	MSTRG.13593	Osclob_v00_mik.OX382167.1G29.1	MSTRG.13593.1	Osclob_v00_mik.OX382167.1G29	8235	3586	10353	4147	23994	4999	22641	20609	3505	6580.25	15149.6	MALE	2190412	NDUV1_MOUSENADH dehydrogenase
OX382167.1	MSTRG.13593	Osclob_v00_mik.OX382167.1G29.1	MSTRG.13593.4	Osclob_v00_mik.OX382167.1G29	1168	1951	1076	1710	2382	1757	2472	3726	2213	1476.25	2510	MALE	2190412	NDUV1_MOUSENADH dehydrogenase
OX382167.1	MSTRG.13593	Osclob_v00_mik.OX382167.1G29.1	MSTRG.13593.6	Osclob_v00_mik.OX382167.1G29	356	262	308	153	2347	1350	1830	266	1422	269.75	1443	MALE	2190412	NDUV1_MOUSENADH dehydrogenase
OX382167.1	MSTRG.13605	Osclob_v00_mik.OX382167.1G41.2	MSTRG.13605.2	Osclob_v00_mik.OX382167.1G41	1190	846	1154	1431	4190	2015	1498	2284	1957	1155.25	2388.8	MALE	2094619	#N/A
OX382167.1	MSTRG.13605	Osclob_v00_mik.OX382167.1G41.3	MSTRG.13605.2	Osclob_v00_mik.OX382167.1G41	1190	846	1154	1431	4190	2015	1498	2284	1957	1155.25	2388.8	MALE	2094620	#N/A
OX382167.1	MSTRG.13605	Osclob_v00_mik.OX382167.1G41.1	MSTRG.13605.2	Osclob_v00_mik.OX382167.1G41	1190	846	1154	1431	4190	2015	1498	2284	1957	1155.25	2388.8	MALE	#N/A	#N/A
OX382167.1	MSTRG.13607	Osclob_v00_mik.OX382167.1G44.1	MSTRG.13607.1	Osclob_v00_mik.OX382167.1G44	732	15	33525	1345	10817	3085	17773	19699	1243	8904.25	10523.4	MALE	2174918	-
OX382167.1	MSTRG.13607	Osclob_v00_mik.OX382167.1G44.1	MSTRG.13607.2	Osclob_v00_mik.OX382167.1G44	2770	1914	9311	708	13909	2290	7040	13913	1846	3675.75	7799.6	MALE	2174918	-
OX382167.1	MSTRG.13607	Osclob_v00_mik.OX382167.1G44.1	MSTRG.13607.3	Osclob_v00_mik.OX382167.1G44	17	11	806	683	671	0	0	818	0	379.25	297.8	MALE	2174918	-
OX382167.1	MSTRG.13607	Osclob_v00_mik.OX382167.1G44.1	MSTRG.13607.4	Osclob_v00_mik.OX382167.1G44	0	0	53	0	0	0	0	0	0	13.25	0	MALE	2174918	-
OX382167.1	MSTRG.13607	Osclob_v00_mik.OX382167.1G44.1	MSTRG.13607.6	Osclob_v00_mik.OX382167.1G44	0	0	1226	0	18366	0	0	306	0	306.5	3734.4	MALE	2174918	-
OX382167.1	MSTRG.13607	Osclob_v00_mik.OX382167.1G45.1	MSTRG.13607.1	Osclob_v00_mik.OX382167.1G45	732	15	33525	1345	10817	3085	17773	19699	1243	8904.25	10523.4	MALE	#N/A	#N/A
OX382167.1	MSTRG.13607	Osclob_v00_mik.OX382167.1G45.1	MSTRG.13607.2	Osclob_v00_mik.OX382167.1G45	2770	1914	9311	708	13909	2290	7040	13913	1846	3675.75	7799.6	MALE	#N/A	#N/A
OX382167.1	MSTRG.13607	Osclob_v00_mik.OX382167.1G45.1	MSTRG.13607.3	Osclob_v00_mik.OX382167.1G45	17	11	806	683	671	0	0	818	0	379.25	297.8	MALE	#N/A	#N/A
OX382167.1	MSTRG.13607	Osclob_v00_mik.OX382167.1G45.1	MSTRG.13607.4	Osclob_v00_mik.OX382167.1G45	0	0	53	0	0	0	0	0	0	13.25	0	MALE	#N/A	#N/A
OX382167.1	MSTRG.13607	Osclob_v00_mik.OX382167.1G45.1	MSTRG.13607.6	Osclob_v00_mik.OX382167.1G45	0	0	1226	0	18366	0	0	306	0	306.5	3734.4	MALE	#N/A	#N/A
OX382167.1	MSTRG.13694	Osclob_v00_mik.OX382167.1G177.1	MSTRG.13694.1	Osclob_v00_mik.OX382167.1G177	12	249	118	30	468	90	11	296	1646	102.25	502.2	MALE	2388128	SGPL1_RATSphingosine-1-phosphate lyase 1 OS=Rattus norvegicus OX=10116 GN=Sgpl1 PE=2 SV=1
OX382167.1	MSTRG.13694	Osclob_v00_mik.OX382167.1G177.1	MSTRG.13694.2	Osclob_v00_mik.OX382167.1G177	17	401	0	86	0	0	0	0	0	126	0	MALE	2388128	SGPL1_RATSphingosine-1-phosphate lyase 1 OS=Rattus norvegicus OX=10116 GN=Sgpl1 PE=2 SV=1
OX382167.1	MSTRG.13694	Osclob_v00_mik.OX382167.1G177.1	MSTRG.13694.3	Osclob_v00_mik.OX382167.1G177	60	25	217	72	294	314	176	508	1689	93.5	596.2	MALE	2388128	SGPL1_RATSphingosine-1-phosphate lyase 1 OS=Rattus norvegicus OX=10116 GN=Sgpl1 PE=2 SV=1
OX382167.1	MSTRG.13694	Osclob_v00_mik.OX382167.1G177.1	MSTRG.13694.6	Osclob_v00_mik.OX382167.1G177	267	324	111	11	1447	1764	710	392	1855	178.25	1233.6	MALE	2388128	SGPL1_RATSphingosine-1-phosphate lyase 1 OS=Rattus norvegicus OX=10116 GN=Sgpl1 PE=2 SV=1
OX382167.1	MSTRG.13732	Osclob_v00_mik.OX382167.1G179.1	MSTRG.13732.1	Osclob_v00_mik.OX382167.1G179	6127	3048	3340	3	13138	2884	5472	13651	1865	3129.5	7402	MALE	#N/A	#N/A
OX382167.1	MSTRG.13732	Osclob_v00_mik.OX382167.1G179.1	MSTRG.13732.2	Osclob_v00_mik.OX382167.1G179	3735	486	1711	206	3987	8300	2060	1972	2685	1534.5	3800.8	MALE	#N/A	#N/A
OX382167.1	MSTRG.13732	Osclob_v00_mik.OX382167.1G179.1	MSTRG.13732.3	Osclob_v00_mik.OX382167.1G179	0	0	615	0	1848	0	0	45	0	153.75	378.6	MALE	#N/A	#N/A
OX382167.1	MSTRG.13732	Osclob_v00_mik.OX382167.1G179.1	MSTRG.13732.4	Osclob_v00_mik.OX382167.1G179	738	4778	5775	2834	1990	16678	8435	765	23008	3531.25	10175.2	MALE	#N/A	#N/A
OX382167.1	MSTRG.13732	Osclob_v00_mik.OX382167.1G179.1	MSTRG.13732.6	Osclob_v00_mik.OX382167.1G179	0	0	0	7201	2268	0	0	761	0	1800.25	605.8	MALE	#N/A	#N/A
OX382167.1	MSTRG.13732	Osclob_v00_mik.OX382167.1G179.1	MSTRG.13732.7	Osclob_v00_mik.OX382167.1G179	256	1058	192	0	2049	936	0	227	33	376.5	649	MALE	#N/A	#N/A
OX382167.1	MSTRG.13732	Osclob_v00_mik.OX382167.1G179.1	MSTRG.13732.8	Osclob_v00_mik.OX382167.1G179	8476	0	3521	0	26260	22956	7361	19094	8401	2999.25	16814.4	MALE	#N/A	#N/A
OX382167.1	MSTRG.13732	Osclob_v00_mik.OX382167.1G179.1	MSTRG.13732.11	Osclob_v00_mik.OX382167.1G179	117	0	1129	1615	44	0	0	0	234	715.25	55.6	MALE	#N/A	#N/A
OX382167.1	MSTRG.13753	Osclob_v00_mik.OX382167.1G208.1	MSTRG.13753.1	Osclob_v00_mik.OX382167.1G208	4353	5670	15691	11490	72	0	7016	0	1827	9301	1783	MALE	#N/A	#N/A
OX382167.1	MSTRG.13753	Osclob_v00_mik.OX382167.1G208.1	MSTRG.13753.2	Osclob_v00_mik.OX382167.1G208	6873	5590	1378	227	122	0	652	1237	1875	3517	777.2	MALE	#N/A	#N/A
OX382167.1	MSTRG.13753	Osclob_v00_mik.OX382167.1G208.1	MSTRG.13753.3	Osclob_v00_mik.OX382167.1G208	111	0	0	0	18	0	198	300	0	27.75	103.2	MALE	#N/A	#N/A
OX382167.1	MSTRG.13753	Osclob_v00_mik.OX382167.1G208.1	MSTRG.13753.4	Osclob_v00_mik.OX382167.1G208	27809	7925	6414	7458	45317	48403	24798	64106	66708	12401.5	49866.4	MALE	#N/A	#N/A
OX382167.1	MSTRG.13767	Osclob_v00_mik.OX382167.1G286.1	MSTRG.13767.1	Osclob_v00_mik.OX382167.1G286	2616	538	1480	1832	6902	5841	1404	8100	5628	1616.5	5575	MALE	#N/A	#N/A
OX382167.1	MSTRG.13767	Osclob_v00_mik.OX382167.1G286.1	MSTRG.13767.2	Osclob_v00_mik.OX382167.1G286	0	2	0	0	4	2	0	2	9	0.5	3.4	MALE	#N/A	#N/A
OX382167.1	MSTRG.13767	Osclob_v00_mik.OX382167.1G286.1	MSTRG.13767.4	Osclob_v00_mik.OX382167.1G286	0	0	0	2	0	1	0	0	0	0.5	0.2	MALE	#N/A	#N/A
OX382167.1	MSTRG.13832	Osclob_v00_mik.OX382167.1G327.1	MSTRG.13832.1	Osclob_v00_mik.OX382167.1G327	50	547	12	195	31	60	7	1	136	201	47	MALE	2275694	TRM11_RATtRNA (guanine(10)-N2)-methyltransferase homolog OS=Rattus norvegicus OX=10116 GN=Trmt11 PE=2 SV=1
OX382167.1	MSTRG.13832	Osclob_v00_mik.OX382167.1G327.1	MSTRG.13832.2	Osclob_v00_mik.OX382167.1G327	35	3	1	107	12	463	0	1	356	36.5	166.4	MALE	2275694	TRM11_RATtRNA (guanine(10)-N2)-methyltransferase homolog OS=Rattus norvegicus OX=10116 GN=Trmt11 PE=2 SV=1
OX382167.1	MSTRG.13895	Osclob_v00_mik.OX382167.1G417.1	MSTRG.13895.1	Osclob_v00_mik.OX382167.1G417	364	25	410	323	691	186	194	585	1719	280.5	675	MALE	#N/A	#N/A
OX382167.1	MSTRG.13895	Osclob_v00_mik.OX382167.1G419.1	MSTRG.13895.1	Osclob_v00_mik.OX382167.1G419	364	25	410	323	691	186	194	585	1719	280.5	675	MALE	#N/A	#N/A
OX382167.1	MSTRG.13914	Osclob_v00_mik.OX382167.1G404.1	MSTRG.13914.2	Osclob_v00_mik.OX382167.1G404	4	18	8	0	0	0	0	0	0	7.5	0	MALE	#N/A	#N/A
OX382167.1	MSTRG.13914	Osclob_v00_mik.OX382167.1G404.1	MSTRG.13914.3	Osclob_v00_mik.OX382167.1G404	12	208	831	64	146	1369	0	213	0	278.75	345.6	MALE	#N/A	#N/A
OX382167.1	MSTRG.13926	Osclob_v00_mik.OX382167.1G416.1	MSTRG.13926.1	Osclob_v00_mik.OX382167.1G416	1053	879	3307	1252	775	1563	1186	1646	1445	1622.75	1323	MALE	#N/A	#N/A
OX382167.1	MSTRG.13926	Osclob_v00_mik.OX382167.1G416.1	MSTRG.13926.2	Osclob_v00_mik.OX382167.1G416	1056	52	0	366	131	414	56	57	2023	368.5	536.2	MALE	#N/A	#N/A
OX382167.1	MSTRG.13926	Osclob_v00_mik.OX382167.1G416.1	MSTRG.13926.3	Osclob_v00_mik.OX382167.1G416	0	0	13	99	0	0	0	0	0	28	0	MALE	#N/A	#N/A
OX382167.1	MSTRG.13926	Osclob_v00_mik.OX382167.1G416.1	MSTRG.13926.4	Osclob_v00_mik.OX382167.1G416	0	0	82	0	0	378	820	404	45	20.5	329.4	MALE	#N/A	#N/A
OX382167.1	MSTRG.13926	Osclob_v00_mik.OX382167.1G416.1	MSTRG.13926.5	Osclob_v00_mik.OX382167.1G416	0	0	0	0	1031	0	0	156	0	0	237.4	MALE	#N/A	#N/A
OX382167.1	MSTRG.13926	Osclob_v00_mik.OX382167.1G416.1	MSTRG.13926.6	Osclob_v00_mik.OX382167.1G416	90	7	308	0	177	0	0	441	50	101.25	133.6	MALE	#N/A	#N/A
OX382167.1	MSTRG.13926	Osclob_v00_mik.OX382167.1G416.1	MSTRG.13926.9	Osclob_v00_mik.OX382167.1G416	8	0	0	0	0	0	0	0	0	2	0	MALE	#N/A	#N/A
OX382167.1	MSTRG.13926	Osclob_v00_mik.OX382167.1G416.1	MSTRG.13926.10	Osclob_v00_mik.OX382167.1G416	474	425	319	0	627	318	436	1280	312	304.5	594.6	MALE	#N/A	#N/A
OX382167.1	MSTRG.13926	Osclob_v00_mik.OX382167.1G416.1	MSTRG.13926.11	Osclob_v00_mik.OX382167.1G416	0	0	0	0	72	0	0	0	0	0	14.4	MALE	#N/A	#N/A
OX382167.1	MSTRG.13926	Osclob_v00_mik.OX382167.1G416.1	MSTRG.13926.13	Osclob_v00_mik.OX382167.1G416	235	608	1298	2311	605	2541	835	1124	27	1113	1026.4	MALE	#N/A	#N/A
OX382167.1	MSTRG.13926	Osclob_v00_mik.OX382167.1G416.1	MSTRG.13926.14	Osclob_v00_mik.OX382167.1G416	263	124	113	144	494	137	296	41	390	161	271.6	MALE	#N/A	#N/A
OX382167.1	MSTRG.13926	Osclob_v00_mik.OX382167.1G416.1	MSTRG.13926.15	Osclob_v00_mik.OX382167.1G416	5	1	1	1	20	1	309	12	26	2	73.6	MALE	#N/A	#N/A
OX382167.1	MSTRG.13926	Osclob_v00_mik.OX382167.1G416.1	MSTRG.13926.16	Osclob_v00_mik.OX382167.1G416	2	317	4	154	7	77	59	141	49	119.25	66.6	MALE	#N/A	#N/A
OX382167.1	MSTRG.13934	Osclob_v00_mik.OX382167.1G442.1	MSTRG.13934.1	Osclob_v00_mik.OX382167.1G442	758	235	569	458	139	516	163	372	648	505	367.6	MALE	#N/A	#N/A
OX382167.1	MSTRG.13934	Osclob_v00_mik.OX382167.1G442.1	MSTRG.13934.3	Osclob_v00_mik.OX382167.1G442	1343	99	864	185	1708	496	116	2423	2254	622.75	1399.4	MALE	#N/A	#N/A
OX382167.1	MSTRG.13955	Osclob_v00_mik.OX382167.1G427.1	MSTRG.13955.1	Osclob_v00_mik.OX382167.1G427	1371	161	1561	955	3639	1078	595	3232	3897	1012	2488.2	MALE	#N/A	#N/A
OX382167.1	MSTRG.13955	Osclob_v00_mik.OX382167.1G427.1	MSTRG.13955.5	Osclob_v00_mik.OX382167.1G427	6	0	3	3	2	0	23	1	4	3	6	MALE	#N/A	#N/A
OX382167.1	MSTRG.13955	Osclob_v00_mik.OX382167.1G427.1	MSTRG.13955.7	Osclob_v00_mik.OX382167.1G427	2	0	0	0	0	0	10	0	8	0.5	3.6	MALE	#N/A	#N/A
OX382167.1	MSTRG.13955	Osclob_v00_mik.OX382167.1G427.1	MSTRG.13955.9	Osclob_v00_mik.OX382167.1G427	42	0	0	0	16	0	0	16	0	10.5	6.4	MALE	#N/A	#N/A
OX382167.1	MSTRG.13955	Osclob_v00_mik.OX382167.1G427.1	MSTRG.13955.10	Osclob_v00_mik.OX382167.1G427	57	0	34	167	9	40	0	4	22	64.5	15	MALE	#N/A	#N/A
OX382167.1	MSTRG.14034	Osclob_v00_mik.OX382167.1G527.1	MSTRG.14034.1	Osclob_v00_mik.OX382167.1G527	0	0	226	8	510	8	0	762	81	58.5	272.2	MALE	#N/A	#N/A
OX382168.1	MSTRG.14118	Osclob_v00_mik.OX382168.1G20.1	MSTRG.14118.1	Osclob_v00_mik.OX382168.1G20	73	2446	201	0	465	51	924	525	8265	680	2046	MALE	1999919	-
OX382168.1	MSTRG.14118	Osclob_v00_mik.OX382168.1G22.1	MSTRG.14118.1	Osclob_v00_mik.OX382168.1G22	73	2446	201	0	465	51	924	525	8265	680	2046	MALE	#N/A	#N/A
OX382167.1	MSTRG.14123	Osclob_v00_mik.OX382167.1G547.1	MSTRG.14123.1	Osclob_v00_mik.OX382167.1G547	15	86	0	0	21	0	127	78	3	25.25	45.8	MALE	#N/A	#N/A
OX382167.1	MSTRG.14123	Osclob_v00_mik.OX382167.1G547.1	MSTRG.14123.2	Osclob_v00_mik.OX382167.1G547	372	115	0	132	764	10	335	1270	1403	154.75	756.4	MALE	#N/A	#N/A
OX382167.1	MSTRG.14123	Osclob_v00_mik.OX382167.1G547.1	MSTRG.14123.3	Osclob_v00_mik.OX382167.1G547	12	41	0	0	42	0	347	20	17	13.25	85.2	MALE	#N/A	#N/A
OX382167.1	MSTRG.14123	Osclob_v00_mik.OX382167.1G547.1	MSTRG.14123.4	Osclob_v00_mik.OX382167.1G547	58	88	7	19	617	21	130	205	87	43	212	MALE	#N/A	#N/A
OX382167.1	MSTRG.14123	Osclob_v00_mik.OX382167.1G547.1	MSTRG.14123.5	Osclob_v00_mik.OX382167.1G547	0	0	0	0	27	0	27	10	6	0	14	MALE	#N/A	#N/A
OX382167.1	MSTRG.14123	Osclob_v00_mik.OX382167.1G547.1	MSTRG.14123.7	Osclob_v00_mik.OX382167.1G547	14	82	0	0	8	0	15	7	4	24	6.8	MALE	#N/A	#N/A
OX382168.1	MSTRG.14133	Osclob_v00_mik.OX382168.1G23.2	MSTRG.14133.4	Osclob_v00_mik.OX382168.1G23	0	0	0	0	0	0	0	0	2555	0	511	MALE	#N/A	#N/A
OX382168.1	MSTRG.14133	Osclob_v00_mik.OX382168.1G23.2	MSTRG.14133.5	Osclob_v00_mik.OX382168.1G23	0	0	0	0	0	0	0	0	1206	0	241.2	MALE	#N/A	#N/A
OX382168.1	MSTRG.14211	Osclob_v00_mik.OX382168.1G131.1	MSTRG.14211.1	Osclob_v00_mik.OX382168.1G131	10	0	166	189	7788	0	282	10289	9891	91.25	5650	MALE	1638807	-
OX382168.1	MSTRG.14211	Osclob_v00_mik.OX382168.1G131.1	MSTRG.14211.2	Osclob_v00_mik.OX382168.1G131	0	0	0	0	4300	0	0	0	0	0	860	MALE	1638807	-
OX382168.1	MSTRG.14211	Osclob_v00_mik.OX382168.1G132.1	MSTRG.14211.1	Osclob_v00_mik.OX382168.1G132	10	0	166	189	7788	0	282	10289	9891	91.25	5650	MALE	1556307	MDN1_HUMANMidasin OS=Homo sapiens OX=9606 GN=MDN1 PE=1 SV=2
OX382168.1	MSTRG.14211	Osclob_v00_mik.OX382168.1G132.1	MSTRG.14211.2	Osclob_v00_mik.OX382168.1G132	0	0	0	0	4300	0	0	0	0	0	860	MALE	1556307	MDN1_HUMANMidasin OS=Homo sapiens OX=9606 GN=MDN1 PE=1 SV=2
OX382168.1	MSTRG.14220	Osclob_v00_mik.OX382168.1G136.1	MSTRG.14220.1	Osclob_v00_mik.OX382168.1G136	177	4302	46	161	474	42	0	698	1954	1171.5	633.6	MALE	#N/A	#N/A
OX382168.1	MSTRG.14220	Osclob_v00_mik.OX382168.1G136.1	MSTRG.14220.3	Osclob_v00_mik.OX382168.1G136	0	64	0	62	0	0	0	0	17	31.5	3.4	MALE	#N/A	#N/A
OX382168.1	MSTRG.14231	Osclob_v00_mik.OX382168.1G33.1	MSTRG.14231.1	Osclob_v00_mik.OX382168.1G33	423	163	1219	696	7725	675	587	9231	1250	625.25	3893.6	MALE	2587269	TORSO_BOMMOTyrosine-protein kinase receptor torso OS=Bombyx mori OX=7091 GN=tor PE=1 SV=1
OX382168.1	MSTRG.14233	Osclob_v00_mik.OX382168.1G28.1	MSTRG.14233.1	Osclob_v00_mik.OX382168.1G28	0	0	0	0	4	0	0	0	1	0	1	MALE	#N/A	#N/A
OX382168.1	MSTRG.14233	Osclob_v00_mik.OX382168.1G28.1	MSTRG.14233.2	Osclob_v00_mik.OX382168.1G28	94	126	14	279	178	163	561	287	302	128.25	298.2	MALE	#N/A	#N/A
OX382168.1	MSTRG.14233	Osclob_v00_mik.OX382168.1G28.1	MSTRG.14233.4	Osclob_v00_mik.OX382168.1G28	83	78	593	10	97	0	2708	103	5139	191	1609.4	MALE	#N/A	#N/A
OX382168.1	MSTRG.14233	Osclob_v00_mik.OX382168.1G28.1	MSTRG.14233.5	Osclob_v00_mik.OX382168.1G28	0	0	1728	0	5	0	114	0	5997	432	1223.2	MALE	#N/A	#N/A
OX382168.1	MSTRG.14233	Osclob_v00_mik.OX382168.1G28.1	MSTRG.14233.6	Osclob_v00_mik.OX382168.1G28	9086	7	0	0	4000	0	0	4081	0	2273.25	1616.2	MALE	#N/A	#N/A
OX382168.1	MSTRG.14233	Osclob_v00_mik.OX382168.1G28.1	MSTRG.14233.7	Osclob_v00_mik.OX382168.1G28	104	0	11028	49	7361	496	301	13873	14	2795.25	4409	MALE	#N/A	#N/A
OX382168.1	MSTRG.14233	Osclob_v00_mik.OX382168.1G28.1	MSTRG.14233.8	Osclob_v00_mik.OX382168.1G28	2556	406	2259	1128	1983	2988	0	2402	0	1587.25	1474.6	MALE	#N/A	#N/A
OX382168.1	MSTRG.14233	Osclob_v00_mik.OX382168.1G28.1	MSTRG.14233.9	Osclob_v00_mik.OX382168.1G28	794	778	872	714	608	422	0	1187	16	789.5	446.6	MALE	#N/A	#N/A
OX382168.1	MSTRG.14233	Osclob_v00_mik.OX382168.1G28.1	MSTRG.14233.12	Osclob_v00_mik.OX382168.1G28	215	0	571	0	6558	844	44	681	30	196.5	1631.4	MALE	#N/A	#N/A
OX382168.1	MSTRG.14233	Osclob_v00_mik.OX382168.1G28.1	MSTRG.14233.13	Osclob_v00_mik.OX382168.1G28	0	0	1780	67	876	1368	1258	4677	527	461.75	1741.2	MALE	#N/A	#N/A
OX382168.1	MSTRG.14233	Osclob_v00_mik.OX382168.1G28.1	MSTRG.14233.14	Osclob_v00_mik.OX382168.1G28	479	409	1133	500	2039	2929	1574	3770	12529	630.25	4568.2	MALE	#N/A	#N/A
OX382168.1	MSTRG.14233	Osclob_v00_mik.OX382168.1G28.1	MSTRG.14233.16	Osclob_v00_mik.OX382168.1G28	171	278	530	140	674	100	277	690	763	279.75	500.8	MALE	#N/A	#N/A
OX382168.1	MSTRG.14233	Osclob_v00_mik.OX382168.1G28.1	MSTRG.14233.17	Osclob_v00_mik.OX382168.1G28	171	72	65	54	443	480	43	217	25	90.5	241.6	MALE	#N/A	#N/A
OX382168.1	MSTRG.14238	Osclob_v00_mik.OX382168.1G29.1	MSTRG.14238.1	Osclob_v00_mik.OX382168.1G29	165	362	2103	132	295	973	206	783	143	690.5	480	MALE	#N/A	#N/A
OX382168.1	MSTRG.14238	Osclob_v00_mik.OX382168.1G29.1	MSTRG.14238.2	Osclob_v00_mik.OX382168.1G29	2305	137	313	693	1369	1571	0	1891	535	862	1073.2	MALE	#N/A	#N/A
OX382168.1	MSTRG.14238	Osclob_v00_mik.OX382168.1G29.1	MSTRG.14238.4	Osclob_v00_mik.OX382168.1G29	793	128	850	290	1178	879	66	1374	505	515.25	800.4	MALE	#N/A	#N/A
OX382168.1	MSTRG.14256	Osclob_v00_mik.OX382168.1G45.1	MSTRG.14256.1	Osclob_v00_mik.OX382168.1G45	1516	321	482	591	377	717	549	869	3046	727.5	1111.6	MALE	#N/A	#N/A
OX382168.1	MSTRG.14256	Osclob_v00_mik.OX382168.1G45.1	MSTRG.14256.2	Osclob_v00_mik.OX382168.1G45	11	52	101	0	2507	15	69	952	2620	41	1232.6	MALE	#N/A	#N/A
OX382168.1	MSTRG.14256	Osclob_v00_mik.OX382168.1G45.1	MSTRG.14256.3	Osclob_v00_mik.OX382168.1G45	0	10	0	0	0	0	0	0	0	2.5	0	MALE	#N/A	#N/A
OX382168.1	MSTRG.14256	Osclob_v00_mik.OX382168.1G45.1	MSTRG.14256.4	Osclob_v00_mik.OX382168.1G45	0	0	335	0	665	0	0	733	0	83.75	279.6	MALE	#N/A	#N/A
OX382168.1	MSTRG.14256	Osclob_v00_mik.OX382168.1G45.1	MSTRG.14256.6	Osclob_v00_mik.OX382168.1G45	0	4	179	0	148	0	8	758	83	45.75	199.4	MALE	#N/A	#N/A
OX382168.1	MSTRG.14256	Osclob_v00_mik.OX382168.1G45.1	MSTRG.14256.7	Osclob_v00_mik.OX382168.1G45	1	0	23	14	37	0	0	48	9	9.5	18.8	MALE	#N/A	#N/A
OX382168.1	MSTRG.14256	Osclob_v00_mik.OX382168.1G45.1	MSTRG.14256.8	Osclob_v00_mik.OX382168.1G45	40	99	0	0	26	45	0	9	1	34.75	16.2	MALE	#N/A	#N/A
OX382168.1	MSTRG.14324	Osclob_v00_mik.OX382168.1G184.1	MSTRG.14324.2	Osclob_v00_mik.OX382168.1G184	0	0	0	0	0	0	0	0	10417	0	2083.4	MALE	#N/A	#N/A
OX382168.1	MSTRG.14445	Osclob_v00_mik.OX382168.1G313.1	MSTRG.14445.1	Osclob_v00_mik.OX382168.1G313	1681	624	1304	1358	4533	1433	800	2081	4375	1241.75	2644.4	MALE	#N/A	#N/A
OX382168.1	MSTRG.14445	Osclob_v00_mik.OX382168.1G313.1	MSTRG.14445.2	Osclob_v00_mik.OX382168.1G313	247	99	752	50	1233	0	279	656	537	287	541	MALE	#N/A	#N/A
OX382168.1	MSTRG.14482	Osclob_v00_mik.OX382168.1G367.2	MSTRG.14482.1	Osclob_v00_mik.OX382168.1G367	90391	10724	30625	48950	193929	157668	32789	163068	298547	45172.5	169200	MALE	#N/A	#N/A
OX382168.1	MSTRG.14482	Osclob_v00_mik.OX382168.1G367.2	MSTRG.14482.4	Osclob_v00_mik.OX382168.1G367	79	0	43	0	879	0	177	515	0	30.5	314.2	MALE	#N/A	#N/A
OX382168.1	MSTRG.14482	Osclob_v00_mik.OX382168.1G367.2	MSTRG.14482.5	Osclob_v00_mik.OX382168.1G367	0	0	35224	0	0	0	0	0	0	8806	0	MALE	#N/A	#N/A
OX382168.1	MSTRG.14482	Osclob_v00_mik.OX382168.1G367.2	MSTRG.14482.8	Osclob_v00_mik.OX382168.1G367	290	500	3667	6778	449	7824	11086	340	2045	2808.75	4348.8	MALE	#N/A	#N/A
OX382168.1	MSTRG.14482	Osclob_v00_mik.OX382168.1G367.2	MSTRG.14482.9	Osclob_v00_mik.OX382168.1G367	0	0	0	0	17095	0	0	34802	4346	0	11248.6	MALE	#N/A	#N/A
OX382168.1	MSTRG.14482	Osclob_v00_mik.OX382168.1G367.2	MSTRG.14482.10	Osclob_v00_mik.OX382168.1G367	141	0	0	0	18313	0	0	6074	9519	35.25	6781.2	MALE	#N/A	#N/A
OX382168.1	MSTRG.14482	Osclob_v00_mik.OX382168.1G367.2	MSTRG.14482.11	Osclob_v00_mik.OX382168.1G367	6185	5948	43	0	0	12045	900	3968	10173	3044	5417.2	MALE	#N/A	#N/A
OX382168.1	MSTRG.14482	Osclob_v00_mik.OX382168.1G367.2	MSTRG.14482.12	Osclob_v00_mik.OX382168.1G367	6756	0	0	0	0	0	899	5762	11099	1689	3552	MALE	#N/A	#N/A
OX382168.1	MSTRG.14482	Osclob_v00_mik.OX382168.1G367.2	MSTRG.14482.13	Osclob_v00_mik.OX382168.1G367	7158	0	0	0	0	0	0	0	0	1789.5	0	MALE	#N/A	#N/A
OX382168.1	MSTRG.14482	Osclob_v00_mik.OX382168.1G367.2	MSTRG.14482.14	Osclob_v00_mik.OX382168.1G367	104	4	233	3820	5773	37	0	2547	2294	1040.25	2130.2	MALE	#N/A	#N/A
OX382168.1	MSTRG.14487	Osclob_v00_mik.OX382168.1G384.1	MSTRG.14487.1	Osclob_v00_mik.OX382168.1G384	9139	3474	12939	7620	21576	12291	7569	18478	22323	8293	16447.4	MALE	2117438	KI21A_HUMANKinesin-like protein KIF21A OS=Homo sapiens OX=9606 GN=KIF21A PE=1 SV=2
OX382168.1	MSTRG.14487	Osclob_v00_mik.OX382168.1G384.1	MSTRG.14487.2	Osclob_v00_mik.OX382168.1G384	0	4	0	0	0	20	0	3	163	1	37.2	MALE	2117438	KI21A_HUMANKinesin-like protein KIF21A OS=Homo sapiens OX=9606 GN=KIF21A PE=1 SV=2
OX382168.1	MSTRG.14497	Osclob_v00_mik.OX382168.1G397.1	MSTRG.14497.1	Osclob_v00_mik.OX382168.1G397	4662	2515	5360	4832	37411	43110	18524	27684	13968	4342.25	28139.4	MALE	#N/A	#N/A
OX382168.1	MSTRG.14497	Osclob_v00_mik.OX382168.1G397.1	MSTRG.14497.2	Osclob_v00_mik.OX382168.1G397	8115	0	7148	0	0	0	975	0	14264	3815.75	3047.8	MALE	#N/A	#N/A
OX382168.1	MSTRG.14497	Osclob_v00_mik.OX382168.1G397.1	MSTRG.14497.3	Osclob_v00_mik.OX382168.1G397	6239	8238	5141	17160	0	256	0	0	13945	9194.5	2840.2	MALE	#N/A	#N/A
OX382168.1	MSTRG.14502	Osclob_v00_mik.OX382168.1G398.1	MSTRG.14502.1	Osclob_v00_mik.OX382168.1G398	348	942	2180	1746	5316	3546	4359	3751	2163	1304	3827	MALE	#N/A	#N/A
OX382168.1	MSTRG.14502	Osclob_v00_mik.OX382168.1G398.1	MSTRG.14502.3	Osclob_v00_mik.OX382168.1G398	0	0	0	0	15	0	0	630	1363	0	401.6	MALE	#N/A	#N/A
OX382168.1	MSTRG.14502	Osclob_v00_mik.OX382168.1G398.1	MSTRG.14502.4	Osclob_v00_mik.OX382168.1G398	3905	1697	0	0	0	0	1083	0	1096	1400.5	435.8	MALE	#N/A	#N/A
OX382168.1	MSTRG.14511	Osclob_v00_mik.OX382168.1G452.1	MSTRG.14511.1	Osclob_v00_mik.OX382168.1G452	110	153	149	540	474	457	323	750	672	238	535.2	MALE	1740685	TM104_DROMETransmembrane protein 104 homolog OS=Drosophila melanogaster OX=7227 GN=CG5262 PE=2 SV=2
OX382168.1	MSTRG.14511	Osclob_v00_mik.OX382168.1G452.1	MSTRG.14511.2	Osclob_v00_mik.OX382168.1G452	227	250	28	125	420	0	131	153	125	157.5	165.8	MALE	1740685	TM104_DROMETransmembrane protein 104 homolog OS=Drosophila melanogaster OX=7227 GN=CG5262 PE=2 SV=2
OX382169.1	MSTRG.14596	Osclob_v00_mik.OX382169.1G25.1	MSTRG.14596.3	Osclob_v00_mik.OX382169.1G25	15	60	0	82	321	329	0	471	1197	39.25	463.6	MALE	#N/A	#N/A
OX382169.1	MSTRG.14596	Osclob_v00_mik.OX382169.1G25.1	MSTRG.14596.4	Osclob_v00_mik.OX382169.1G25	0	0	0	0	140	0	0	10	7	0	31.4	MALE	#N/A	#N/A
OX382169.1	MSTRG.14596	Osclob_v00_mik.OX382169.1G25.1	MSTRG.14596.7	Osclob_v00_mik.OX382169.1G25	0	0	0	13	0	0	0	1	1	3.25	0.4	MALE	#N/A	#N/A
OX382169.1	MSTRG.14649	Osclob_v00_mik.OX382169.1G51.1	MSTRG.14649.2	Osclob_v00_mik.OX382169.1G51	0	0	565	1323	931	941	0	0	0	472	374.4	MALE	#N/A	#N/A
OX382169.1	MSTRG.14951	Osclob_v00_mik.OX382169.1G311.1	MSTRG.14951.1	Osclob_v00_mik.OX382169.1G311	7032	741	310	563	1606	653	892	33423	11457	2161.5	9606.2	MALE	#N/A	#N/A
OX382169.1	MSTRG.14951	Osclob_v00_mik.OX382169.1G311.1	MSTRG.14951.2	Osclob_v00_mik.OX382169.1G311	5206	2441	29202	5926	56286	13900	16368	9063	7092	10693.8	20541.8	MALE	#N/A	#N/A
OX382169.1	MSTRG.14951	Osclob_v00_mik.OX382169.1G311.1	MSTRG.14951.3	Osclob_v00_mik.OX382169.1G311	0	107	0	26	0	97	135	5057	19712	33.25	5000.2	MALE	#N/A	#N/A
OX382169.1	MSTRG.14951	Osclob_v00_mik.OX382169.1G311.1	MSTRG.14951.4	Osclob_v00_mik.OX382169.1G311	144	49	1990	0	916	2808	2945	870	379	545.75	1583.6	MALE	#N/A	#N/A
OX382169.1	MSTRG.14958	Osclob_v00_mik.OX382169.1G367.1	MSTRG.14958.1	Osclob_v00_mik.OX382169.1G367	127578	37350	57013	90284	237166	154051	13151	228375	180260	78056.2	162601	MALE	1956245	AGRE5_BOVINAdhesion G protein-coupled receptor E5 OS=Bos taurus OX=9913 GN=ADGRE5 PE=2 SV=1
OX382169.1	MSTRG.14960	Osclob_v00_mik.OX382169.1G333.1	MSTRG.14960.1	Osclob_v00_mik.OX382169.1G333	26993	10871	38805	29054	68090	53496	17504	51967	53306	26430.8	48872.6	MALE	2301795	BBOF1_HUMANBasal body-orientation factor 1 OS=Homo sapiens OX=9606 GN=BBOF1 PE=2 SV=3
OX382169.1	MSTRG.14960	Osclob_v00_mik.OX382169.1G333.1	MSTRG.14960.4	Osclob_v00_mik.OX382169.1G333	1493	476	6224	8528	5451	8681	185	7704	12843	4180.25	6972.8	MALE	2301795	BBOF1_HUMANBasal body-orientation factor 1 OS=Homo sapiens OX=9606 GN=BBOF1 PE=2 SV=3
OX382169.1	MSTRG.15022	Osclob_v00_mik.OX382169.1G391.1	MSTRG.15022.1	Osclob_v00_mik.OX382169.1G391	924	0	3045	1140	9874	10450	13856	1797	6354	1277.25	8466.2	MALE	#N/A	#N/A
OX382169.1	MSTRG.15022	Osclob_v00_mik.OX382169.1G391.1	MSTRG.15022.2	Osclob_v00_mik.OX382169.1G391	16078	13048	10628	13116	36232	13152	12821	33156	23629	13217.5	23798	MALE	#N/A	#N/A
OX382169.1	MSTRG.15052	Osclob_v00_mik.OX382169.1G433.1	MSTRG.15052.1	Osclob_v00_mik.OX382169.1G433	12660	5461	22082	12957	80697	31168	9803	32680	47891	13290	40447.8	MALE	#N/A	#N/A
OX382169.1	MSTRG.15052	Osclob_v00_mik.OX382169.1G433.1	MSTRG.15052.3	Osclob_v00_mik.OX382169.1G433	7279	302	84	5118	1879	440	681	15045	1188	3195.75	3846.6	MALE	#N/A	#N/A
OX382169.1	MSTRG.15052	Osclob_v00_mik.OX382169.1G433.1	MSTRG.15052.4	Osclob_v00_mik.OX382169.1G433	0	0	3040	0	0	0	0	18196	240	760	3687.2	MALE	#N/A	#N/A
OX382169.1	MSTRG.15052	Osclob_v00_mik.OX382169.1G433.1	MSTRG.15052.5	Osclob_v00_mik.OX382169.1G433	0	0	263	32	251	0	2250	138	0	73.75	527.8	MALE	#N/A	#N/A
OX382169.1	MSTRG.15063	Osclob_v00_mik.OX382169.1G395.1	MSTRG.15063.2	Osclob_v00_mik.OX382169.1G395	7476	1264	7321	6814	14314	54945	2337	9984	21690	5718.75	20654	MALE	2231261	SVEP1_HUMANSushi, von Willebrand factor type A, EGF and pentraxin domain-containing protein 1 OS=Homo sapiens OX=9606 GN=SVEP1 PE=1 SV=3
OX382169.1	MSTRG.15063	Osclob_v00_mik.OX382169.1G395.1	MSTRG.15063.3	Osclob_v00_mik.OX382169.1G395	0	0	1564	178	0	0	0	0	567	435.5	113.4	MALE	2231261	SVEP1_HUMANSushi, von Willebrand factor type A, EGF and pentraxin domain-containing protein 1 OS=Homo sapiens OX=9606 GN=SVEP1 PE=1 SV=3
OX382169.1	MSTRG.15063	Osclob_v00_mik.OX382169.1G395.1	MSTRG.15063.4	Osclob_v00_mik.OX382169.1G395	19	129	210	26	1502	6391	43	1186	658	96	1956	MALE	2231261	SVEP1_HUMANSushi, von Willebrand factor type A, EGF and pentraxin domain-containing protein 1 OS=Homo sapiens OX=9606 GN=SVEP1 PE=1 SV=3
OX382169.1	MSTRG.15063	Osclob_v00_mik.OX382169.1G395.1	MSTRG.15063.5	Osclob_v00_mik.OX382169.1G395	48	5	779	5	609	717	10	141	412	209.25	377.8	MALE	2231261	SVEP1_HUMANSushi, von Willebrand factor type A, EGF and pentraxin domain-containing protein 1 OS=Homo sapiens OX=9606 GN=SVEP1 PE=1 SV=3
OX382169.1	MSTRG.15063	Osclob_v00_mik.OX382169.1G395.1	MSTRG.15063.6	Osclob_v00_mik.OX382169.1G395	0	17	4	132	43	48	53	43	39	38.25	45.2	MALE	2231261	SVEP1_HUMANSushi, von Willebrand factor type A, EGF and pentraxin domain-containing protein 1 OS=Homo sapiens OX=9606 GN=SVEP1 PE=1 SV=3
OX382169.1	MSTRG.15063	Osclob_v00_mik.OX382169.1G395.1	MSTRG.15063.7	Osclob_v00_mik.OX382169.1G395	56	28	171	378	181	301	233	208	454	158.25	275.4	MALE	2231261	SVEP1_HUMANSushi, von Willebrand factor type A, EGF and pentraxin domain-containing protein 1 OS=Homo sapiens OX=9606 GN=SVEP1 PE=1 SV=3
OX382169.1	MSTRG.15063	Osclob_v00_mik.OX382169.1G395.1	MSTRG.15063.8	Osclob_v00_mik.OX382169.1G395	0	40	0	0	0	0	0	0	0	10	0	MALE	2231261	SVEP1_HUMANSushi, von Willebrand factor type A, EGF and pentraxin domain-containing protein 1 OS=Homo sapiens OX=9606 GN=SVEP1 PE=1 SV=3
OX382169.1	MSTRG.15063	Osclob_v00_mik.OX382169.1G395.1	MSTRG.15063.9	Osclob_v00_mik.OX382169.1G395	18	8	1	490	0	261	0	0	0	129.25	52.2	MALE	2231261	SVEP1_HUMANSushi, von Willebrand factor type A, EGF and pentraxin domain-containing protein 1 OS=Homo sapiens OX=9606 GN=SVEP1 PE=1 SV=3
OX382169.1	MSTRG.15063	Osclob_v00_mik.OX382169.1G395.1	MSTRG.15063.10	Osclob_v00_mik.OX382169.1G395	0	0	0	396	0	0	0	0	0	99	0	MALE	2231261	SVEP1_HUMANSushi, von Willebrand factor type A, EGF and pentraxin domain-containing protein 1 OS=Homo sapiens OX=9606 GN=SVEP1 PE=1 SV=3
OX382169.1	MSTRG.15063	Osclob_v00_mik.OX382169.1G395.1	MSTRG.15063.11	Osclob_v00_mik.OX382169.1G395	222	0	0	0	2403	4062	73	1874	1952	55.5	2072.8	MALE	2231261	SVEP1_HUMANSushi, von Willebrand factor type A, EGF and pentraxin domain-containing protein 1 OS=Homo sapiens OX=9606 GN=SVEP1 PE=1 SV=3
OX382169.1	MSTRG.15063	Osclob_v00_mik.OX382169.1G395.1	MSTRG.15063.12	Osclob_v00_mik.OX382169.1G395	0	0	0	0	0	0	0	0	1654	0	330.8	MALE	2231261	SVEP1_HUMANSushi, von Willebrand factor type A, EGF and pentraxin domain-containing protein 1 OS=Homo sapiens OX=9606 GN=SVEP1 PE=1 SV=3
OX382169.1	MSTRG.15063	Osclob_v00_mik.OX382169.1G395.1	MSTRG.15063.13	Osclob_v00_mik.OX382169.1G395	0	0	53	0	1	37	0	393	7	13.25	87.6	MALE	2231261	SVEP1_HUMANSushi, von Willebrand factor type A, EGF and pentraxin domain-containing protein 1 OS=Homo sapiens OX=9606 GN=SVEP1 PE=1 SV=3
OX382169.1	MSTRG.15063	Osclob_v00_mik.OX382169.1G395.1	MSTRG.15063.14	Osclob_v00_mik.OX382169.1G395	131	0	83	0	4	3084	0	340	898	53.5	865.2	MALE	2231261	SVEP1_HUMANSushi, von Willebrand factor type A, EGF and pentraxin domain-containing protein 1 OS=Homo sapiens OX=9606 GN=SVEP1 PE=1 SV=3
OX382169.1	MSTRG.15063	Osclob_v00_mik.OX382169.1G395.1	MSTRG.15063.15	Osclob_v00_mik.OX382169.1G395	12	18	450	0	27	5257	31	15	1857	120	1437.4	MALE	2231261	SVEP1_HUMANSushi, von Willebrand factor type A, EGF and pentraxin domain-containing protein 1 OS=Homo sapiens OX=9606 GN=SVEP1 PE=1 SV=3
OX382169.1	MSTRG.15063	Osclob_v00_mik.OX382169.1G395.1	MSTRG.15063.16	Osclob_v00_mik.OX382169.1G395	52	11	1	0	334	2322	17	267	1221	16	832.2	MALE	2231261	SVEP1_HUMANSushi, von Willebrand factor type A, EGF and pentraxin domain-containing protein 1 OS=Homo sapiens OX=9606 GN=SVEP1 PE=1 SV=3
OX382169.1	MSTRG.15063	Osclob_v00_mik.OX382169.1G395.1	MSTRG.15063.17	Osclob_v00_mik.OX382169.1G395	55	6	7	0	105	404	0	92	384	17	197	MALE	2231261	SVEP1_HUMANSushi, von Willebrand factor type A, EGF and pentraxin domain-containing protein 1 OS=Homo sapiens OX=9606 GN=SVEP1 PE=1 SV=3
OX382169.1	MSTRG.15063	Osclob_v00_mik.OX382169.1G395.1	MSTRG.15063.20	Osclob_v00_mik.OX382169.1G395	5967	554	1250	727	652	2374	1686	113	1249	2124.5	1214.8	MALE	2231261	SVEP1_HUMANSushi, von Willebrand factor type A, EGF and pentraxin domain-containing protein 1 OS=Homo sapiens OX=9606 GN=SVEP1 PE=1 SV=3
OX382169.1	MSTRG.15063	Osclob_v00_mik.OX382169.1G395.1	MSTRG.15063.21	Osclob_v00_mik.OX382169.1G395	47	10	1	147	33	0	22	106	799	51.25	192	MALE	2231261	SVEP1_HUMANSushi, von Willebrand factor type A, EGF and pentraxin domain-containing protein 1 OS=Homo sapiens OX=9606 GN=SVEP1 PE=1 SV=3
OX382169.1	MSTRG.15063	Osclob_v00_mik.OX382169.1G395.1	MSTRG.15063.22	Osclob_v00_mik.OX382169.1G395	0	0	78	0	0	3786	0	0	0	19.5	757.2	MALE	2231261	SVEP1_HUMANSushi, von Willebrand factor type A, EGF and pentraxin domain-containing protein 1 OS=Homo sapiens OX=9606 GN=SVEP1 PE=1 SV=3
OX382169.1	MSTRG.15063	Osclob_v00_mik.OX382169.1G395.1	MSTRG.15063.23	Osclob_v00_mik.OX382169.1G395	66	0	81	0	0	1162	0	0	0	36.75	232.4	MALE	2231261	SVEP1_HUMANSushi, von Willebrand factor type A, EGF and pentraxin domain-containing protein 1 OS=Homo sapiens OX=9606 GN=SVEP1 PE=1 SV=3
OX382169.1	MSTRG.15063	Osclob_v00_mik.OX382169.1G395.1	MSTRG.15063.24	Osclob_v00_mik.OX382169.1G395	60	15	1083	0	686	103	0	2026	169	289.5	596.8	MALE	2231261	SVEP1_HUMANSushi, von Willebrand factor type A, EGF and pentraxin domain-containing protein 1 OS=Homo sapiens OX=9606 GN=SVEP1 PE=1 SV=3
OX382169.1	MSTRG.15063	Osclob_v00_mik.OX382169.1G395.1	MSTRG.15063.25	Osclob_v00_mik.OX382169.1G395	1	1	12	10	33	15	0	19	0	6	13.4	MALE	2231261	SVEP1_HUMANSushi, von Willebrand factor type A, EGF and pentraxin domain-containing protein 1 OS=Homo sapiens OX=9606 GN=SVEP1 PE=1 SV=3
OX382169.1	MSTRG.15063	Osclob_v00_mik.OX382169.1G395.1	MSTRG.15063.26	Osclob_v00_mik.OX382169.1G395	0	0	1	732	1	0	1	0	0	183.25	0.4	MALE	2231261	SVEP1_HUMANSushi, von Willebrand factor type A, EGF and pentraxin domain-containing protein 1 OS=Homo sapiens OX=9606 GN=SVEP1 PE=1 SV=3
OX382169.1	MSTRG.15063	Osclob_v00_mik.OX382169.1G395.1	MSTRG.15063.27	Osclob_v00_mik.OX382169.1G395	0	39	26	0	0	87	42	0	0	16.25	25.8	MALE	2231261	SVEP1_HUMANSushi, von Willebrand factor type A, EGF and pentraxin domain-containing protein 1 OS=Homo sapiens OX=9606 GN=SVEP1 PE=1 SV=3
OX382169.1	MSTRG.15063	Osclob_v00_mik.OX382169.1G395.1	MSTRG.15063.28	Osclob_v00_mik.OX382169.1G395	0	0	23	116	8	0	0	12	15	34.75	7	MALE	2231261	SVEP1_HUMANSushi, von Willebrand factor type A, EGF and pentraxin domain-containing protein 1 OS=Homo sapiens OX=9606 GN=SVEP1 PE=1 SV=3
OX382169.1	MSTRG.15063	Osclob_v00_mik.OX382169.1G395.1	MSTRG.15063.29	Osclob_v00_mik.OX382169.1G395	46	10	51	156	100	149	5	55	510	65.75	163.8	MALE	2231261	SVEP1_HUMANSushi, von Willebrand factor type A, EGF and pentraxin domain-containing protein 1 OS=Homo sapiens OX=9606 GN=SVEP1 PE=1 SV=3
OX382169.1	MSTRG.15063	Osclob_v00_mik.OX382169.1G395.1	MSTRG.15063.30	Osclob_v00_mik.OX382169.1G395	0	0	0	569	0	0	0	5	29	142.25	6.8	MALE	2231261	SVEP1_HUMANSushi, von Willebrand factor type A, EGF and pentraxin domain-containing protein 1 OS=Homo sapiens OX=9606 GN=SVEP1 PE=1 SV=3
OX382169.1	MSTRG.15063	Osclob_v00_mik.OX382169.1G395.1	MSTRG.15063.31	Osclob_v00_mik.OX382169.1G395	0	0	16	391	73	0	0	2	663	101.75	147.6	MALE	2231261	SVEP1_HUMANSushi, von Willebrand factor type A, EGF and pentraxin domain-containing protein 1 OS=Homo sapiens OX=9606 GN=SVEP1 PE=1 SV=3
OX382169.1	MSTRG.15063	Osclob_v00_mik.OX382169.1G395.1	MSTRG.15063.32	Osclob_v00_mik.OX382169.1G395	0	0	116	0	0	0	0	0	0	29	0	MALE	2231261	SVEP1_HUMANSushi, von Willebrand factor type A, EGF and pentraxin domain-containing protein 1 OS=Homo sapiens OX=9606 GN=SVEP1 PE=1 SV=3
OX382169.1	MSTRG.15063	Osclob_v00_mik.OX382169.1G395.1	MSTRG.15063.33	Osclob_v00_mik.OX382169.1G395	197	85	4006	2413	2212	1570	77	3510	2934	1675.25	2060.6	MALE	2231261	SVEP1_HUMANSushi, von Willebrand factor type A, EGF and pentraxin domain-containing protein 1 OS=Homo sapiens OX=9606 GN=SVEP1 PE=1 SV=3
OX382169.1	MSTRG.15063	Osclob_v00_mik.OX382169.1G395.1	MSTRG.15063.34	Osclob_v00_mik.OX382169.1G395	0	0	0	0	56	0	0	0	0	0	11.2	MALE	2231261	SVEP1_HUMANSushi, von Willebrand factor type A, EGF and pentraxin domain-containing protein 1 OS=Homo sapiens OX=9606 GN=SVEP1 PE=1 SV=3
OX382169.1	MSTRG.15063	Osclob_v00_mik.OX382169.1G395.1	MSTRG.15063.35	Osclob_v00_mik.OX382169.1G395	55	0	511	140	0	0	24	4470	755	176.5	1049.8	MALE	2231261	SVEP1_HUMANSushi, von Willebrand factor type A, EGF and pentraxin domain-containing protein 1 OS=Homo sapiens OX=9606 GN=SVEP1 PE=1 SV=3
OX382169.1	MSTRG.15063	Osclob_v00_mik.OX382169.1G395.1	MSTRG.15063.37	Osclob_v00_mik.OX382169.1G395	0	0	0	6	0	0	0	0	0	1.5	0	MALE	2231261	SVEP1_HUMANSushi, von Willebrand factor type A, EGF and pentraxin domain-containing protein 1 OS=Homo sapiens OX=9606 GN=SVEP1 PE=1 SV=3
OX382169.1	MSTRG.15063	Osclob_v00_mik.OX382169.1G395.1	MSTRG.15063.38	Osclob_v00_mik.OX382169.1G395	0	0	2529	0	0	0	0	78	441	632.25	103.8	MALE	2231261	SVEP1_HUMANSushi, von Willebrand factor type A, EGF and pentraxin domain-containing protein 1 OS=Homo sapiens OX=9606 GN=SVEP1 PE=1 SV=3
OX382169.1	MSTRG.15063	Osclob_v00_mik.OX382169.1G395.1	MSTRG.15063.39	Osclob_v00_mik.OX382169.1G395	20	1435	3309	0	1566	0	0	1326	4	1191	579.2	MALE	2231261	SVEP1_HUMANSushi, von Willebrand factor type A, EGF and pentraxin domain-containing protein 1 OS=Homo sapiens OX=9606 GN=SVEP1 PE=1 SV=3
OX382169.1	MSTRG.15063	Osclob_v00_mik.OX382169.1G395.1	MSTRG.15063.40	Osclob_v00_mik.OX382169.1G395	0	0	27	7553	9	0	0	25	10630	1895	2132.8	MALE	2231261	SVEP1_HUMANSushi, von Willebrand factor type A, EGF and pentraxin domain-containing protein 1 OS=Homo sapiens OX=9606 GN=SVEP1 PE=1 SV=3
OX382169.1	MSTRG.15063	Osclob_v00_mik.OX382169.1G395.1	MSTRG.15063.41	Osclob_v00_mik.OX382169.1G395	4550	1101	8438	429	0	0	0	284	7073	3629.5	1471.4	MALE	2231261	SVEP1_HUMANSushi, von Willebrand factor type A, EGF and pentraxin domain-containing protein 1 OS=Homo sapiens OX=9606 GN=SVEP1 PE=1 SV=3
OX382169.1	MSTRG.15063	Osclob_v00_mik.OX382169.1G395.1	MSTRG.15063.42	Osclob_v00_mik.OX382169.1G395	515	3276	15	784	21205	12423	7288	19368	14120	1147.5	14880.8	MALE	2231261	SVEP1_HUMANSushi, von Willebrand factor type A, EGF and pentraxin domain-containing protein 1 OS=Homo sapiens OX=9606 GN=SVEP1 PE=1 SV=3
OX382169.1	MSTRG.15063	Osclob_v00_mik.OX382169.1G395.1	MSTRG.15063.43	Osclob_v00_mik.OX382169.1G395	1310	911	152	50	8021	115	95	961	186	605.75	1875.6	MALE	2231261	SVEP1_HUMANSushi, von Willebrand factor type A, EGF and pentraxin domain-containing protein 1 OS=Homo sapiens OX=9606 GN=SVEP1 PE=1 SV=3
OX382169.1	MSTRG.15063	Osclob_v00_mik.OX382169.1G395.1	MSTRG.15063.44	Osclob_v00_mik.OX382169.1G395	1126	9	1947	232	2145	5622	237	487	2786	828.5	2255.4	MALE	2231261	SVEP1_HUMANSushi, von Willebrand factor type A, EGF and pentraxin domain-containing protein 1 OS=Homo sapiens OX=9606 GN=SVEP1 PE=1 SV=3
OX382169.1	MSTRG.15063	Osclob_v00_mik.OX382169.1G395.1	MSTRG.15063.46	Osclob_v00_mik.OX382169.1G395	87	0	0	4	104	2	88	88	0	22.75	56.4	MALE	2231261	SVEP1_HUMANSushi, von Willebrand factor type A, EGF and pentraxin domain-containing protein 1 OS=Homo sapiens OX=9606 GN=SVEP1 PE=1 SV=3
CANNPT010000001.1	Osclob_v00_mik.CANNPT010000001.1G11	Osclob_v00_mik.CANNPT010000001.1G11.1	Osclob_v00_mik.CANNPT010000001.1G11.1	NA	0	0	0	0	0	0	0	0	0	0	0	MALE	#N/A	#N/A
OX382150.1	Osclob_v00_mik.OX382150.1G1568	Osclob_v00_mik.OX382150.1G1568.1	Osclob_v00_mik.OX382150.1G1568.1	NA	0	7	0	0	0	0	0	0	0	1.75	0	MALE	#N/A	#N/A
OX382154.1	Osclob_v00_mik.OX382154.1G594	Osclob_v00_mik.OX382154.1G594.1	Osclob_v00_mik.OX382154.1G594.1	NA	0	0	0	0	0	0	0	0	0	0	0	MALE	2379624	TIGD6_HUMANTigger transposable element-derived protein 6 OS=Homo sapiens OX=9606 GN=TIGD6 PE=2 SV=2
OX382154.1	Osclob_v00_mik.OX382154.1G641	Osclob_v00_mik.OX382154.1G641.1	Osclob_v00_mik.OX382154.1G641.1	NA	0	0	0	0	0	0	0	0	0	0	0	MALE	#N/A	#N/A
OX382154.1	Osclob_v00_mik.OX382154.1G647	Osclob_v00_mik.OX382154.1G647.1	Osclob_v00_mik.OX382154.1G647.1	NA	32	6	82	17	127	0	13	185	48	34.25	74.6	MALE	1753723	POL2_DROMERetrovirus-related Pol polyprotein from transposon 297 OS=Drosophila melanogaster OX=7227 GN=pol PE=4 SV=1
OX382154.1	Osclob_v00_mik.OX382154.1G652	Osclob_v00_mik.OX382154.1G652.1	Osclob_v00_mik.OX382154.1G652.1	NA	0	0	0	0	20	0	0	0	0	0	4	MALE	#N/A	#N/A
OX382154.1	Osclob_v00_mik.OX382154.1G660	Osclob_v00_mik.OX382154.1G660.1	Osclob_v00_mik.OX382154.1G660.1	NA	0	0	0	0	0	0	0	0	9	0	1.8	MALE	1587122	YRD6_CAEELUncharacterized protein K02A2.6 OS=Caenorhabditis elegans OX=6239 GN=K02A2.6 PE=4 SV=1
OX382156.1	Osclob_v00_mik.OX382156.1G268	Osclob_v00_mik.OX382156.1G268.1	Osclob_v00_mik.OX382156.1G268.1	NA	0	0	0	0	0	0	0	0	0	0	0	MALE	#N/A	#N/A
OX382157.1	Osclob_v00_mik.OX382157.1G346	Osclob_v00_mik.OX382157.1G346.1	Osclob_v00_mik.OX382157.1G346.1	NA	8	0	0	0	0	0	0	0	0	2	0	MALE	#N/A	#N/A
OX382158.1	Osclob_v00_mik.OX382158.1G402	Osclob_v00_mik.OX382158.1G402.1	Osclob_v00_mik.OX382158.1G402.1	NA	0	0	0	0	0	0	0	0	0	0	0	MALE	1112068	-
OX382158.1	Osclob_v00_mik.OX382158.1G414	Osclob_v00_mik.OX382158.1G414.1	Osclob_v00_mik.OX382158.1G414.1	NA	0	0	3	0	0	0	0	0	0	0.75	0	MALE	1709427	-
OX382159.1	Osclob_v00_mik.OX382159.1G586	Osclob_v00_mik.OX382159.1G586.1	Osclob_v00_mik.OX382159.1G586.1	NA	0	0	0	0	0	0	0	0	0	0	0	MALE	#N/A	#N/A
OX382160.1	Osclob_v00_mik.OX382160.1G515	Osclob_v00_mik.OX382160.1G515.1	Osclob_v00_mik.OX382160.1G515.1	NA	0	0	0	0	0	0	0	0	39	0	7.8	MALE	2569424	-
OX382162.1	Osclob_v00_mik.OX382162.1G356	Osclob_v00_mik.OX382162.1G356.1	Osclob_v00_mik.OX382162.1G356.1	NA	0	0	0	0	0	0	0	0	0	0	0	MALE	#N/A	#N/A
OX382165.1	Osclob_v00_mik.OX382165.1G97	Osclob_v00_mik.OX382165.1G97.1	Osclob_v00_mik.OX382165.1G97.1	NA	0	0	0	0	0	0	0	0	0	0	0	MALE	#N/A	#N/A
OX382165.1	Osclob_v00_mik.OX382165.1G115	Osclob_v00_mik.OX382165.1G115.1	Osclob_v00_mik.OX382165.1G115.1	NA	3	0	0	0	0	0	0	0	0	0.75	0	MALE	2140160	-
OX382166.1	Osclob_v00_mik.OX382166.1G372	Osclob_v00_mik.OX382166.1G372.1	Osclob_v00_mik.OX382166.1G372.1	NA	0	0	0	0	0	0	0	0	0	0	0	MALE	1986757	-
OX382166.1	Osclob_v00_mik.OX382166.1G379	Osclob_v00_mik.OX382166.1G379.1	Osclob_v00_mik.OX382166.1G379.1	NA	9	0	0	0	0	0	0	9	0	2.25	1.8	MALE	3334290	-
OX382167.1	Osclob_v00_mik.OX382167.1G454	Osclob_v00_mik.OX382167.1G454.1	Osclob_v00_mik.OX382167.1G454.1	NA	0	0	0	0	0	0	4	0	0	0	0.8	MALE	1976365	MANBA_CAPHIBeta-mannosidase OS=Capra hircus OX=9925 GN=MANBA PE=1 SV=1

## Sheet: B. Chondrosia reniformis
					Female (TPMs)					Male (TPMs)
Chr	Gene_ID	Transcript_ID	Exon_ID	ref_gene_id	ChNap22_23_F	Ch4_20_F	ChNap22_6_F	Ch7_20_F	ChNap22_10_F	Ch21_21_M	Ch5_20_M	ChNap22_20_M	ChNap22_24_M	ChNap22_22_M	AVERAGE_F	AVERAGE_M	Sex-specific	RASEX_loci	BLAST
OX359189.1	MSTRG.944	Choren_v00_mik.OX359189.1G1047.1	N/A	Choren_v00_mik.OX359189.1G1047	1638	315	782	793	1027	2266	277	91	66	504	911	640.8	MAL	2121705	#N/A
OX359189.1	MSTRG.957	Choren_v00_mik.OX359189.1G1051.1	N/A	Choren_v00_mik.OX359189.1G1051	0	0	0	0	0	0	0	0	0	0	0	0	MAL	3400153	#N/A
OX359189.1	MSTRG.957	Choren_v00_mik.OX359189.1G1051.2	N/A	Choren_v00_mik.OX359189.1G1051	13209	346	4077	871	546	5282	103	335	1334	328	3809.8	1476.4	MAL	3400153	#N/A
OX359189.1	MSTRG.971	Choren_v00_mik.OX359189.1G1065.1	N/A	Choren_v00_mik.OX359189.1G1065	999	299	0	5	0	28	83	0	0	0	260.6	22.2	FEM	4447076	-
OX359189.1	MSTRG.996	Choren_v00_mik.OX359189.1G1083.1	N/A	Choren_v00_mik.OX359189.1G1083	289	920	279	983	1214	508	690	349	151	23	737	344.2	MAL	2970465	#N/A
OX359189.1	MSTRG.996	Choren_v00_mik.OX359189.1G1083.1	N/A	Choren_v00_mik.OX359189.1G1083	289	920	279	983	1214	508	690	349	151	23	737	344.2	MAL	5614463	#N/A
OX359189.1	MSTRG.976	Choren_v00_mik.OX359189.1G1099.1	N/A	Choren_v00_mik.OX359189.1G1099	9104	3723	3902	3206	3314	1887	889	1899	491	1408	4649.8	1314.8	FEM	2822436	#N/A
OX359189.1	MSTRG.1004	Choren_v00_mik.OX359189.1G1108.1	N/A	Choren_v00_mik.OX359189.1G1108	3502	1828	4847	4107	1284	339	552	3577	5601	4565	3113.6	2926.8	MAL	2811714	#N/A
OX359189.1	MSTRG.1004	Choren_v00_mik.OX359189.1G1108.2	N/A	Choren_v00_mik.OX359189.1G1108	2687	133	109	14	486	692	36	267	62	144	685.8	240.2	MAL	2811714	#N/A
OX359189.1	MSTRG.1004	Choren_v00_mik.OX359189.1G1108.3	N/A	Choren_v00_mik.OX359189.1G1108	3087	748	349	313	621	459	518	186	275	42	1023.6	296	MAL	2811714	#N/A
OX359189.1	MSTRG.1052	Choren_v00_mik.OX359189.1G1155.1	N/A	Choren_v00_mik.OX359189.1G1155	9238	1129	2627	1935	1486	332	220	26779	4597	17973	3283	9980.2	MAL	2943802	S47A1_MOUSEMultidrug and toxin extrusion protein 1 OS=Mus musculus OX=10090 GN=Slc47a1 PE=1 SV=2
OX359189.1	MSTRG.1043	Choren_v00_mik.OX359189.1G1165.1	N/A	Choren_v00_mik.OX359189.1G1165	55	23	33	77	48	33	19	20	8	8	47.2	17.6	MAL	2866250	#N/A
OX359189.1	MSTRG.1091	Choren_v00_mik.OX359189.1G1209.1	N/A	Choren_v00_mik.OX359189.1G1209	238	44	0	0	0	275	36	0	125	0	56.4	87.2	MAL	1900599	#N/A
OX359189.1	MSTRG.1091	Choren_v00_mik.OX359189.1G1209.2	N/A	Choren_v00_mik.OX359189.1G1209	0	0	95	20	82	0	0	8	0	27	39.4	7	MAL	1900599	#N/A
OX359189.1	MSTRG.1168	Choren_v00_mik.OX359189.1G1302.1	N/A	Choren_v00_mik.OX359189.1G1302	81	131	279	351	59	62	16	203	673	293	180.2	249.4	MAL	2166007	FUT10_CHICKAlpha-(1,3)-fucosyltransferase 10 OS=Gallus gallus OX=9031 GN=FUT10 PE=2 SV=2
OX359189.1	MSTRG.1168	Choren_v00_mik.OX359189.1G1302.2	N/A	Choren_v00_mik.OX359189.1G1302	419	301	75	351	836	7	0	44	0	0	396.4	10.2	MAL	2166007	#N/A
OX359189.1	MSTRG.1168	Choren_v00_mik.OX359189.1G1302.3	N/A	Choren_v00_mik.OX359189.1G1302	654	98	23	0	236	222	0	0	0	108	202.2	66	MAL	2166007	#N/A
OX359189.1	MSTRG.1403	Choren_v00_mik.OX359189.1G1362.1	N/A	Choren_v00_mik.OX359189.1G1362	3619	4212	2138	1009	0	0	574	1594	2324	2328	2195.6	1364	MAL	846235	YQY2_CAEELUncharacterized protein F36G3.2 OS=Caenorhabditis elegans OX=6239 GN=F36G3.2 PE=4 SV=1
OX359189.1	MSTRG.1403	Choren_v00_mik.OX359189.1G1374.1	N/A	Choren_v00_mik.OX359189.1G1374	358	118	121	125	315	53	33	0	68	506	207.4	132	MAL	3465323	#N/A
OX359189.1	MSTRG.1301	Choren_v00_mik.OX359189.1G1494.1	N/A	Choren_v00_mik.OX359189.1G1494	142	40	40	15	82	36	60	59	17	21	63.8	38.6	MAL	1451388	#N/A
OX359189.1	MSTRG.1301	Choren_v00_mik.OX359189.1G1494.1	N/A	Choren_v00_mik.OX359189.1G1494	142	40	40	15	82	36	60	59	17	21	63.8	38.6	MAL	6034593	-
OX359189.1	MSTRG.1332	Choren_v00_mik.OX359189.1G1514.1	N/A	Choren_v00_mik.OX359189.1G1514	312	45	90	55	17	40	22	12	82	40	103.8	39.2	MAL	1925058	#N/A
OX359189.1	MSTRG.1332	Choren_v00_mik.OX359189.1G1514.1	N/A	Choren_v00_mik.OX359189.1G1514	312	45	90	55	17	40	22	12	82	40	103.8	39.2	MAL	2233289	#N/A
OX359189.1	MSTRG.1334	Choren_v00_mik.OX359189.1G1515.1	N/A	Choren_v00_mik.OX359189.1G1515.1	91	9	32	14	10	16	0	4	19	57	31.2	19.2	MAL	2233289	#N/A
OX359189.1	MSTRG.1330	Choren_v00_mik.OX359189.1G1516.1	N/A	Choren_v00_mik.OX359189.1G1516	118	5	0	0	2	3	0	0	0	59	25	12.4	MAL	1964144	#N/A
OX359189.1	MSTRG.1312	Choren_v00_mik.OX359189.1G1525.1	N/A	Choren_v00_mik.OX359189.1G1525	33372	10255	10396	6454	917	2837	2575	36907	4437	2528	12278.8	9856.8	MAL	2269559	#N/A
OX359189.1	MSTRG.1378	Choren_v00_mik.OX359189.1G1573.1	N/A	Choren_v00_mik.OX359189.1G1573	0	798	204	807	0	345	436	0	0	0	361.8	156.2	FEM	2785167	#N/A
OX359189.1	MSTRG.1505	Choren_v00_mik.OX359189.1G1708.1	N/A	Choren_v00_mik.OX359189.1G1708	548	26	269	0	97	480	244	2601	122	42	188	697.8	FEM	1318476	#N/A
OX359189.1	MSTRG.1505	Choren_v00_mik.OX359189.1G1708.1	N/A	Choren_v00_mik.OX359189.1G1708	548	26	269	0	97	480	244	2601	122	42	188	697.8	FEM	1969318	#N/A
OX359189.1	MSTRG.1505	Choren_v00_mik.OX359189.1G1708.1	N/A	Choren_v00_mik.OX359189.1G1708	548	26	269	0	97	480	244	2601	122	42	188	697.8	FEM	2316757	#N/A
OX359189.1	MSTRG.1505	Choren_v00_mik.OX359189.1G1708.1	N/A	Choren_v00_mik.OX359189.1G1708	548	26	269	0	97	480	244	2601	122	42	188	697.8	FEM	2453012	#N/A
OX359189.1	MSTRG.1505	Choren_v00_mik.OX359189.1G1708.1	N/A	Choren_v00_mik.OX359189.1G1708	548	26	269	0	97	480	244	2601	122	42	188	697.8	MAL	3401632	#N/A
OX359189.1	MSTRG.178	Choren_v00_mik.OX359189.1G189.1	N/A	Choren_v00_mik.OX359189.1G189	1586	1112	823	20	886	829	493	0	404	1060	885.4	557.2	MAL	3744879	#N/A
OX359189.1	MSTRG.177	Choren_v00_mik.OX359189.1G191.1	N/A	Choren_v00_mik.OX359189.1G191	33230	6378	6665	3817	5181	4432	2689	1739	7553	4317	11054.2	4146	MAL	1694222	MPRI_BOVINCation-independent mannose-6-phosphate receptor OS=Bos taurus OX=9913 GN=IGF2R PE=1 SV=2
OX359189.1	MSTRG.177	Choren_v00_mik.OX359189.1G191.1	N/A	Choren_v00_mik.OX359189.1G191	33230	6378	6665	3817	5181	4432	2689	1739	7553	4317	11054.2	4146	MAL	3424831	MPRI_BOVINCation-independent mannose-6-phosphate receptor OS=Bos taurus OX=9913 GN=IGF2R PE=1 SV=2
OX359189.1	MSTRG.179	Choren_v00_mik.OX359189.1G192.1	N/A	Choren_v00_mik.OX359189.1G192	187468	61467	70447	75110	64633	62305	29800	45329	103862	76416	91825	63542.4	MAL	3668695	#N/A
OX359189.1	MSTRG.231	Choren_v00_mik.OX359189.1G258.1	N/A	Choren_v00_mik.OX359189.1G258	17392	5603	8692	8553	10943	10407	2576	1831	2359	3702	10236.6	4175	MAL	1983410	#N/A
OX359189.1	MSTRG.261	Choren_v00_mik.OX359189.1G273.1	N/A	Choren_v00_mik.OX359189.1G273	27	0	212	55	0	0	0	0	0	0	58.8	0	MAL	3545173	#N/A
OX359189.1	MSTRG.430	Choren_v00_mik.OX359189.1G384.1	N/A	Choren_v00_mik.OX359189.1G384	1	0	0	69	6	0	0	0	0	87	15.2	17.4	MAL	1199557	#N/A
OX359189.1	MSTRG.430	Choren_v00_mik.OX359189.1G384.1	N/A	Choren_v00_mik.OX359189.1G384	1	0	0	69	6	0	0	0	0	87	15.2	17.4	MAL	1899417	#N/A
OX359189.1	MSTRG.430	Choren_v00_mik.OX359189.1G384.2	N/A	Choren_v00_mik.OX359189.1G384	0	0	0	0	0	0	0	83	0	0	0	16.6	MAL	1199557	#N/A
OX359189.1	MSTRG.430	Choren_v00_mik.OX359189.1G384.2	N/A	Choren_v00_mik.OX359189.1G384	0	0	0	0	0	0	0	83	0	0	0	16.6	MAL	1899417	#N/A
OX359189.1	MSTRG.430	Choren_v00_mik.OX359189.1G384.3	N/A	Choren_v00_mik.OX359189.1G384	12672	1044	3933	2201	2240	1801	1336	1864	3335	2169	4418	2101	MAL	1199557	#N/A
OX359189.1	MSTRG.430	Choren_v00_mik.OX359189.1G384.3	N/A	Choren_v00_mik.OX359189.1G384	12672	1044	3933	2201	2240	1801	1336	1864	3335	2169	4418	2101	MAL	1899417	#N/A
OX359189.1	MSTRG.435	Choren_v00_mik.OX359189.1G385.1	N/A	Choren_v00_mik.OX359189.1G385	7779	685	2949	422	1146	2079	912	785	1764	902	2596.2	1288.4	MAL	3360271	#N/A
OX359189.1	MSTRG.497	Choren_v00_mik.OX359189.1G515.1	N/A	Choren_v00_mik.OX359189.1G515	5508	766	1580	1304	558	849	416	1637	1359	1468	1943.2	1145.8	MAL	3443092	#N/A
OX359189.1	MSTRG.497	Choren_v00_mik.OX359189.1G516.1	N/A	Choren_v00_mik.OX359189.1G516	38671	11121	7393	15102	3238	12949	4812	76683	29449	57241	15105	36226.8	FEM	3790630	#N/A
OX359189.1	MSTRG.549	Choren_v00_mik.OX359189.1G573.1	N/A	Choren_v00_mik.OX359189.1G573	0	0	0	0	0	0	0	0	0	0	0	0	MAL	3387375	#N/A
OX359189.1	MSTRG.602	Choren_v00_mik.OX359189.1G640.1	N/A	Choren_v00_mik.OX359189.1G640	12345	1347	3669	1772	3195	3269	1288	45194	22293	51726	4465.6	24754	FEM	712417	#N/A
OX359189.1	MSTRG.602	Choren_v00_mik.OX359189.1G640.1	N/A	Choren_v00_mik.OX359189.1G640	12345	1347	3669	1772	3195	3269	1288	45194	22293	51726	4465.6	24754	FEM	2231846	#N/A
OX359189.1	MSTRG.641	Choren_v00_mik.OX359189.1G713.1	N/A	Choren_v00_mik.OX359189.1G713	2312	914	1229	1012	1195	672	413	1865	1686	2215	1332.4	1370.2	MAL	2540330	#N/A
OX359189.1	MSTRG.641	Choren_v00_mik.OX359189.1G713.2	N/A	Choren_v00_mik.OX359189.1G713	537	169	223	97	527	269	102	543	599	766	310.6	455.8	MAL	2540330	#N/A
OX359189.1	MSTRG.656	Choren_v00_mik.OX359189.1G716.1	N/A	Choren_v00_mik.OX359189.1G716	19124	3624	7108	2219	8350	4896	1647	8322	4959	10092	8085	5983.2	MAL	1665334	#N/A
OX359189.1	MSTRG.656	Choren_v00_mik.OX359189.1G716.1	N/A	Choren_v00_mik.OX359189.1G716	19124	3624	7108	2219	8350	4896	1647	8322	4959	10092	8085	5983.2	MAL	2309953	#N/A
OX359189.1	MSTRG.656	Choren_v00_mik.OX359189.1G716.1	N/A	Choren_v00_mik.OX359189.1G716	19124	3624	7108	2219	8350	4896	1647	8322	4959	10092	8085	5983.2	MAL	6020312	#N/A
OX359189.1	MSTRG.656	Choren_v00_mik.OX359189.1G716.2	N/A	Choren_v00_mik.OX359189.1G716	2025	237	124	2616	280	252	72	219	899	143	1056.4	317	MAL	1665334	#N/A
OX359189.1	MSTRG.656	Choren_v00_mik.OX359189.1G716.2	N/A	Choren_v00_mik.OX359189.1G716	2025	237	124	2616	280	252	72	219	899	143	1056.4	317	MAL	2309953	#N/A
OX359189.1	MSTRG.656	Choren_v00_mik.OX359189.1G716.2	N/A	Choren_v00_mik.OX359189.1G716	2025	237	124	2616	280	252	72	219	899	143	1056.4	317	MAL	6020312	#N/A
OX359189.1	MSTRG.683	Choren_v00_mik.OX359189.1G757.1	N/A	Choren_v00_mik.OX359189.1G757	153	23	64	15	31	13	0	24	45	54	57.2	27.2	FEM	278391	#N/A
OX359189.1	MSTRG.683	Choren_v00_mik.OX359189.1G757.1	N/A	Choren_v00_mik.OX359189.1G757	153	23	64	15	31	13	0	24	45	54	57.2	27.2	FEM	2505716	#N/A
OX359189.1	MSTRG.683	Choren_v00_mik.OX359189.1G757.2	N/A	Choren_v00_mik.OX359189.1G757	2	6	27	6	0	6	0	5	14	0	8.2	5	FEM	278391	#N/A
OX359189.1	MSTRG.683	Choren_v00_mik.OX359189.1G757.2	N/A	Choren_v00_mik.OX359189.1G757	2	6	27	6	0	6	0	5	14	0	8.2	5	FEM	2505716	#N/A
OX359189.1	MSTRG.723	Choren_v00_mik.OX359189.1G813.1	N/A	Choren_v00_mik.OX359189.1G813	2209	476	405	718	522	388	326	0	637	566	866	383.4	MAL	3940832	NCA11_XENLANeural cell adhesion molecule 1-A OS=Xenopus laevis OX=8355 GN=ncam1-a PE=2 SV=1
OX359189.1	MSTRG.769	Choren_v00_mik.OX359189.1G857.1	N/A	Choren_v00_mik.OX359189.1G857	349	6	114	211	178	63	7	134	52	157	171.6	82.6	MAL	3820769	TM107_DANRETransmembrane protein 107 OS=Danio rerio OX=7955 GN=tmem107 PE=2 SV=1
OX359189.1	MSTRG.772	Choren_v00_mik.OX359189.1G860.1	N/A	Choren_v00_mik.OX359189.1G860	269	21	59	26	86	45	36	192	133	144	92.2	110	MAL	2595433	#N/A
OX359189.1	MSTRG.772	Choren_v00_mik.OX359189.1G860.2	N/A	Choren_v00_mik.OX359189.1G860	1844	46	376	165	213	143	112	708	1567	408	528.8	587.6	MAL	2595433	#N/A
OX359189.1	MSTRG.779	Choren_v00_mik.OX359189.1G871.1	N/A	Choren_v00_mik.OX359189.1G871	20655	2370	3202	3014	3270	1502	826	835	3911	2066	6502.2	1828	MAL	1726733	BRWD3_HUMANBromodomain and WD repeat-containing protein 3 OS=Homo sapiens OX=9606 GN=BRWD3 PE=1 SV=2
OX359189.1	MSTRG.791	Choren_v00_mik.OX359189.1G879.1	N/A	Choren_v00_mik.OX359189.1G879	268	245	164	304	73	331	58	11	11	51	210.8	92.4	MAL	1203690	#N/A
OX359189.1	MSTRG.792	Choren_v00_mik.OX359189.1G882.1	N/A	Choren_v00_mik.OX359189.1G882	19315	570	11919	1701	10129	510	1637	16665	6955	17237	8726.8	8600.8	MAL	3334305	FGFR3_DANREFibroblast growth factor receptor 3 OS=Danio rerio OX=7955 GN=fgfr3 PE=2 SV=1
OX359189.1	MSTRG.792	Choren_v00_mik.OX359189.1G883.1	N/A	Choren_v00_mik.OX359189.1G883	2702	30	6	14	45	807	13	3	617	145	559.4	317	MAL	3398263	AIMP1_CRIGRAminoacyl tRNA synthase complex-interacting multifunctional protein 1 OS=Cricetulus griseus OX=10029 GN=AIMP1 PE=2 SV=1
OX359189.1	MSTRG.795	Choren_v00_mik.OX359189.1G887.1	N/A	Choren_v00_mik.OX359189.1G887	1574	306	495	460	547	397	115	10415	1200	6794	676.4	3784.2	MAL	2462785	#N/A
OX359189.1	MSTRG.796	Choren_v00_mik.OX359189.1G888.1	N/A	Choren_v00_mik.OX359189.1G888	15588	3052	6040	5985	5280	2575	1276	1668	3663	3704	7189	2577.2	MAL	3500398	SIM2_HUMANSingle-minded homolog 2 OS=Homo sapiens OX=9606 GN=SIM2 PE=1 SV=2
OX359189.1	MSTRG.796	Choren_v00_mik.OX359189.1G888.2	N/A	Choren_v00_mik.OX359189.1G888	2517	1076	902	209	889	1575	227	651	162	228	1118.6	568.6	MAL	3500398	#N/A
OX359189.1	MSTRG.797	Choren_v00_mik.OX359189.1G889.1	N/A	Choren_v00_mik.OX359189.1G889	22508	2208	4841	3863	6215	1501	1138	3921	3210	5153	7927	2984.6	MAL	1757450	TRAF2_MOUSETNF receptor-associated factor 2 OS=Mus musculus OX=10090 GN=Traf2 PE=1 SV=1
OX359189.1	MSTRG.797	Choren_v00_mik.OX359189.1G889.1	N/A	Choren_v00_mik.OX359189.1G889	22508	2208	4841	3863	6215	1501	1138	3921	3210	5153	7927	2984.6	FEM	2085858	TRAF2_MOUSETNF receptor-associated factor 2 OS=Mus musculus OX=10090 GN=Traf2 PE=1 SV=1
OX359189.1	MSTRG.797	Choren_v00_mik.OX359189.1G889.1	N/A	Choren_v00_mik.OX359189.1G889	22508	2208	4841	3863	6215	1501	1138	3921	3210	5153	7927	2984.6	FEM	2340673	TRAF2_MOUSETNF receptor-associated factor 2 OS=Mus musculus OX=10090 GN=Traf2 PE=1 SV=1
OX359189.1	MSTRG.799	Choren_v00_mik.OX359189.1G891.1	N/A	Choren_v00_mik.OX359189.1G891	8551	2123	2818	2077	2208	1736	902	3820	7333	4961	3555.4	3750.4	MAL	2497605	USF1_RABITUpstream stimulatory factor 1 OS=Oryctolagus cuniculus OX=9986 GN=USF1 PE=2 SV=1
OX359190.1	MSTRG.2373	Choren_v00_mik.OX359190.1G1039.1	N/A	Choren_v00_mik.OX359190.1G1039	33669	7790	9187	9209	8473	5717	3029	7385	14318	8626	13665.6	7815	MAL	2528330	VPS16_HUMANVacuolar protein sorting-associated protein 16 homolog OS=Homo sapiens OX=9606 GN=VPS16 PE=1 SV=2
OX359190.1	MSTRG.2446	Choren_v00_mik.OX359190.1G1142.1	N/A	Choren_v00_mik.OX359190.1G1142	20444	5569	6114	7460	7620	4026	2372	1512	2667	3031	9441.4	2721.6	MAL	2216029	#N/A
OX359190.1	MSTRG.2446	Choren_v00_mik.OX359190.1G1142.2	N/A	Choren_v00_mik.OX359190.1G1142	5867	116	2035	279	1478	1443	5	453	79	824	1955	560.8	MAL	2216029	#N/A
OX359190.1	MSTRG.2555	Choren_v00_mik.OX359190.1G1223.1	N/A	Choren_v00_mik.OX359190.1G1223	5676	1379	2290	2191	3527	1051	604	325	345	1130	3012.6	691	FEM	2786524	#N/A
OX359190.1	MSTRG.2574	Choren_v00_mik.OX359190.1G1241.1	N/A	Choren_v00_mik.OX359190.1G1241	62	267	27	3882	84	69	383	6419	1624	280	864.4	1755	MAL	2760697	#N/A
OX359190.1	MSTRG.2574	Choren_v00_mik.OX359190.1G1241.1	N/A	Choren_v00_mik.OX359190.1G1241	62	267	27	3882	84	69	383	6419	1624	280	864.4	1755	MAL	2946388	#N/A
OX359190.1	MSTRG.2605	Choren_v00_mik.OX359190.1G1274.1	N/A	Choren_v00_mik.OX359190.1G1274	0	0	0	0	0	0	0	0	0	0	0	0	MAL	3515475	#N/A
OX359190.1	MSTRG.2597	Choren_v00_mik.OX359190.1G1283.1	N/A	Choren_v00_mik.OX359190.1G1283	97112	12330	13164	28411	3996	8548	4195	69727	14340	66951	31002.6	32752.2	FEM	2862177	#N/A
OX359190.1	MSTRG.2707	Choren_v00_mik.OX359190.1G1378.1	N/A	Choren_v00_mik.OX359190.1G1378	2980	0	184	237	44	1590	0	0	0	0	689	318	MAL	2123852	MASU1_MOUSEMitochondrial assembly of ribosomal large subunit protein 1 OS=Mus musculus OX=10090 GN=Malsu1 PE=1 SV=1
OX359190.1	MSTRG.2707	Choren_v00_mik.OX359190.1G1378.2	N/A	Choren_v00_mik.OX359190.1G1378	197	1105	43	1381	364	149	73	32	517	863	618	326.8	MAL	2123852	#N/A
OX359190.1	MSTRG.2725	Choren_v00_mik.OX359190.1G1389.1	N/A	Choren_v00_mik.OX359190.1G1389	7757	1592	2181	2025	1595	934	622	7004	3774	6856	3030	3838	MAL	460319	#N/A
OX359190.1	MSTRG.2725	Choren_v00_mik.OX359190.1G1389.2	N/A	Choren_v00_mik.OX359190.1G1389	3284	783	963	790	688	448	319	3218	1670	3160	1301.6	1763	MAL	460319	#N/A
OX359190.1	MSTRG.2652	Choren_v00_mik.OX359190.1G1434.1	N/A	Choren_v00_mik.OX359190.1G1434	4545	903	183	295	2570	111	1176	3548	8860	2725	1699.2	3284	FEM	4901004	DYH1_MOUSEDynein axonemal heavy chain 1 OS=Mus musculus OX=10090 GN=Dnah1 PE=1 SV=1
OX359190.1	MSTRG.2777	Choren_v00_mik.OX359190.1G1472.1	N/A	Choren_v00_mik.OX359190.1G1472	13	83	258	21	580	30	1109	324	29	3224	191	943.2	MAL	2109408	ABCG5_RATATP-binding cassette sub-family G member 5 OS=Rattus norvegicus OX=10116 GN=Abcg5 PE=1 SV=3
OX359190.1	MSTRG.1744	Choren_v00_mik.OX359190.1G250.1	N/A	Choren_v00_mik.OX359190.1G250	17141	5286	5803	4944	5069	4260	1982	16447	11865	16813	7648.6	10273.4	MAL	824081	#N/A
OX359190.1	MSTRG.1744	Choren_v00_mik.OX359190.1G250.1	N/A	Choren_v00_mik.OX359190.1G250	17141	5286	5803	4944	5069	4260	1982	16447	11865	16813	7648.6	10273.4	MAL	3394900	#N/A
OX359190.1	MSTRG.1756	Choren_v00_mik.OX359190.1G258.1	N/A	Choren_v00_mik.OX359190.1G258	4701	1024	2057	1468	2055	1429	447	780	2013	1323	2261	1198.4	MAL	3482444	#N/A
OX359190.1	MSTRG.1890	Choren_v00_mik.OX359190.1G283.1	N/A	Choren_v00_mik.OX359190.1G283	357	628	502	445	376	0	148	0	94	1158	461.6	280	FEM	2596014	#N/A
OX359190.1	MSTRG.1870	Choren_v00_mik.OX359190.1G399.1	N/A	Choren_v00_mik.OX359190.1G399	1	48	1	13	1	1	0	1	1	5	12.8	1.6	FEM	1989227	#N/A
OX359190.1	MSTRG.1923	Choren_v00_mik.OX359190.1G416.1	N/A	Choren_v00_mik.OX359190.1G416	5	349	384	657	10	48	53	0	180	459	281	148	MAL	1438337	#N/A
OX359190.1	MSTRG.1925	Choren_v00_mik.OX359190.1G431.2	N/A	Choren_v00_mik.OX359190.1G431	3394	355	1096	572	611	1801	143	442	418	2060	1205.6	972.8	FEM	4181796	#N/A
OX359190.1	MSTRG.1920	Choren_v00_mik.OX359190.1G453.1	N/A	Choren_v00_mik.OX359190.1G453	9570	5392	5835	2512	3573	3765	910	4475	6319	4356	5376.4	3965	MAL	3411033	#N/A
OX359190.1	MSTRG.1920	Choren_v00_mik.OX359190.1G453.2	N/A	Choren_v00_mik.OX359190.1G453	5936	0	204	0	230	91	0	0	352	112	1274	111	MAL	3411033	#N/A
OX359190.1	MSTRG.1920	Choren_v00_mik.OX359190.1G453.3	N/A	Choren_v00_mik.OX359190.1G453	8564	172	3478	1840	2917	0	724	3590	6384	3943	3394.2	2928.2	MAL	3411033	#N/A
OX359190.1	MSTRG.1952	Choren_v00_mik.OX359190.1G458.1	N/A	Choren_v00_mik.OX359190.1G458	0	0	0	0	0	0	0	0	0	0	0	0	MAL	2622154	KLH15_DANREKelch-like protein 15 OS=Danio rerio OX=7955 GN=klhl15 PE=2 SV=1
OX359190.1	MSTRG.1952	Choren_v00_mik.OX359190.1G461.1	N/A	Choren_v00_mik.OX359190.1G461	0	0	0	0	0	0	0	0	0	0	0	0	MAL	213473	#N/A
OX359190.1	MSTRG.2025	Choren_v00_mik.OX359190.1G630.1	N/A	Choren_v00_mik.OX359190.1G630	2236	562	52	732	106	129	20	23	61	356	737.6	117.8	MAL	1731267	#N/A
OX359190.1	MSTRG.2025	Choren_v00_mik.OX359190.1G630.1	N/A	Choren_v00_mik.OX359190.1G630	2236	562	52	732	106	129	20	23	61	356	737.6	117.8	MAL	2166379	#N/A
OX359190.1	MSTRG.2025	Choren_v00_mik.OX359190.1G630.1	N/A	Choren_v00_mik.OX359190.1G630	2236	562	52	732	106	129	20	23	61	356	737.6	117.8	MAL	5759039	AGRD1_MOUSEAdhesion G-protein coupled receptor D1 OS=Mus musculus OX=10090 GN=Adgrd1 PE=2 SV=2
OX359190.1	MSTRG.2047	Choren_v00_mik.OX359190.1G652.1	N/A	Choren_v00_mik.OX359190.1G652	0	0	0	0	0	0	0	0	10	0	0	2	MAL	879177	#N/A
OX359190.1	Choren_v00_mik.OX359190.1G656	Choren_v00_mik.OX359190.1G656.1	N/A	Choren_v00_mik.OX359190.1G656	0	0	0	0	3	0	0	0	9	0	0.6	1.8	MAL	2546834	#N/A
OX359190.1	MSTRG.2183	Choren_v00_mik.OX359190.1G747.1	N/A	Choren_v00_mik.OX359190.1G747	16000	1079	6863	1890	5598	3141	1420	6702	1121	6571	6286	3791	FEM	4775749	-
OX359190.1	Choren_v00_mik.OX359190.1G818	Choren_v00_mik.OX359190.1G818.1	N/A	Choren_v00_mik.OX359190.1G818	0	0	0	0	0	0	0	0	0	0	0	0	FEM	2108031	YTX2_XENLATransposon TX1 uncharacterized 149 kDa protein OS=Xenopus laevis OX=8355 PE=4 SV=1
OX359190.1	MSTRG.2232	Choren_v00_mik.OX359190.1G824.1	N/A	Choren_v00_mik.OX359190.1G824	22	0	0	0	0	0	0	0	0	100	4.4	20	FEM	1669595	#N/A
OX359190.1	MSTRG.2236	Choren_v00_mik.OX359190.1G835.2	N/A	Choren_v00_mik.OX359190.1G835	2030	617	1021	534	973	905	289	1005	1181	1274	1035	930.8	FEM	2224320	#N/A
OX359190.1	MSTRG.1554	Choren_v00_mik.OX359190.1G88.1	N/A	Choren_v00_mik.OX359190.1G88	0	0	0	354	0	0	77	0	0	0	70.8	15.4	MAL	1964914	#N/A
OX359190.1	MSTRG.2303	Choren_v00_mik.OX359190.1G932.1	N/A	Choren_v00_mik.OX359190.1G932	0	0	0	0	0	0	1	0	0	0	0	0.2	FEM	3238776	#N/A
OX359190.1	MSTRG.2341	Choren_v00_mik.OX359190.1G982.1	N/A	Choren_v00_mik.OX359190.1G982	10290	140	448	387	0	0	22	305	0	212	2253	107.8	FEM	2114710	CL004_RATProtein C12orf4 homolog OS=Rattus norvegicus OX=10116 PE=1 SV=1
OX359190.1	MSTRG.2341	Choren_v00_mik.OX359190.1G982.1	N/A	Choren_v00_mik.OX359190.1G982	10290	140	448	387	0	0	22	305	0	212	2253	107.8	FEM	2531915	CL004_RATProtein C12orf4 homolog OS=Rattus norvegicus OX=10116 PE=1 SV=1
OX359190.1	MSTRG.2341	Choren_v00_mik.OX359190.1G982.1	N/A	Choren_v00_mik.OX359190.1G982	10290	140	448	387	0	0	22	305	0	212	2253	107.8	FEM	5624234	CL004_RATProtein C12orf4 homolog OS=Rattus norvegicus OX=10116 PE=1 SV=1
OX359190.1	MSTRG.2341	Choren_v00_mik.OX359190.1G982.2	N/A	Choren_v00_mik.OX359190.1G982	11078	3229	7608	5314	4991	1344	577	3124	2599	5074	6444	2543.6	FEM	2114710	#N/A
OX359190.1	MSTRG.2341	Choren_v00_mik.OX359190.1G982.2	N/A	Choren_v00_mik.OX359190.1G982	11078	3229	7608	5314	4991	1344	577	3124	2599	5074	6444	2543.6	FEM	2466102	#N/A
OX359190.1	MSTRG.2341	Choren_v00_mik.OX359190.1G982.2	N/A	Choren_v00_mik.OX359190.1G982	11078	3229	7608	5314	4991	1344	577	3124	2599	5074	6444	2543.6	FEM	2531915	#N/A
OX359190.1	MSTRG.2341	Choren_v00_mik.OX359190.1G982.2	N/A	Choren_v00_mik.OX359190.1G982	11078	3229	7608	5314	4991	1344	577	3124	2599	5074	6444	2543.6	FEM	5624234	#N/A
OX359190.1	MSTRG.2340	Choren_v00_mik.OX359190.1G983.1	N/A	Choren_v00_mik.OX359190.1G983	3751	228	813	0	146	626	14	122	1274	414	987.6	490	FEM	1475881	#N/A
OX359190.1	MSTRG.2340	Choren_v00_mik.OX359190.1G983.1	N/A	Choren_v00_mik.OX359190.1G983	3751	228	813	0	146	626	14	122	1274	414	987.6	490	FEM	2064955	#N/A
OX359190.1	MSTRG.2342	Choren_v00_mik.OX359190.1G984.1	N/A	Choren_v00_mik.OX359190.1G984.1	8	0	835	12	10	0	0	1318	0	0	173	263.6	FEM	2466102	#N/A
OX359190.1	MSTRG.2342	Choren_v00_mik.OX359190.1G984.2	N/A	Choren_v00_mik.OX359190.1G984.2	237	0	0	85	10	0	0	0	0	0	66.4	0	FEM	2466102	#N/A
OX359190.1	MSTRG.2333	Choren_v00_mik.OX359190.1G991.1	N/A	Choren_v00_mik.OX359190.1G991	8163	3661	3640	3452	2711	2971	1336	721	5461	2245	4325.4	2546.8	MAL	2701182	#N/A
OX359191.1	MSTRG.3638	Choren_v00_mik.OX359191.1G1001.1	N/A	Choren_v00_mik.OX359191.1G1001	255048	60942	98847	45951	84749	53529	17875	29831	103192	64649	109107	53815.2	MAL	1940047	#N/A
OX359191.1	MSTRG.3644	Choren_v00_mik.OX359191.1G1007.1	N/A	Choren_v00_mik.OX359191.1G1007	0	0	0	1860	0	0	0	0	0	0	372	0	MAL	1544006	DMBT1_HUMANDeleted in malignant brain tumors 1 protein OS=Homo sapiens OX=9606 GN=DMBT1 PE=1 SV=2
OX359191.1	MSTRG.3644	Choren_v00_mik.OX359191.1G1007.2	N/A	Choren_v00_mik.OX359191.1G1007	65170	12576	13843	2166	24044	4619	6462	2319	4666	29385	23559.8	9490.2	MAL	1544006	#N/A
OX359191.1	MSTRG.3644	Choren_v00_mik.OX359191.1G1007.3	N/A	Choren_v00_mik.OX359191.1G1007	0	0	0	0	0	0	0	0	0	0	0	0	MAL	1544006	#N/A
OX359191.1	MSTRG.2887	Choren_v00_mik.OX359191.1G102.1	N/A	Choren_v00_mik.OX359191.1G102	470	101	96	124	205	84	0	38	43	73	199.2	47.6	MAL	2467070	#N/A
OX359191.1	MSTRG.3825	Choren_v00_mik.OX359191.1G1211.1	N/A	Choren_v00_mik.OX359191.1G1211	4627	718	1518	2641	264	0	18	552	8	161	1953.6	147.8	FEM	3009986	#N/A
OX359191.1	MSTRG.3821	Choren_v00_mik.OX359191.1G1213.1	N/A	Choren_v00_mik.OX359191.1G1213	59327	13373	24159	11685	19999	12416	4152	6369	15911	11906	25708.6	10150.8	MAL	6042845	DMBT1_HUMANDeleted in malignant brain tumors 1 protein OS=Homo sapiens OX=9606 GN=DMBT1 PE=1 SV=2
OX359191.1	MSTRG.3824	Choren_v00_mik.OX359191.1G1215.1	N/A	Choren_v00_mik.OX359191.1G1215	0	0	44	0	0	17	0	0	0	0	8.8	3.4	FEM	2636292	#N/A
OX359191.1	MSTRG.3860	Choren_v00_mik.OX359191.1G1245.1	N/A	Choren_v00_mik.OX359191.1G1245	186	133	100	76	37	0	24	60	100	0	106.4	36.8	MAL	3149821	#N/A
OX359191.1	MSTRG.3860	Choren_v00_mik.OX359191.1G1245.2	N/A	Choren_v00_mik.OX359191.1G1245	37029	6413	15040	8379	9493	2807	1842	2222	3659	5136	15270.8	3133.2	MAL	3149821	#N/A
OX359191.1	MSTRG.3865	Choren_v00_mik.OX359191.1G1253.1	N/A	Choren_v00_mik.OX359191.1G1253	9644	3264	3379	2842	2500	2775	1521	3218	8820	5805	4325.8	4427.8	FEM	4694135	#N/A
OX359191.1	MSTRG.2943	Choren_v00_mik.OX359191.1G168.1	N/A	Choren_v00_mik.OX359191.1G168	1092	1338	102	1268	218	67	423	1057	616	199	803.6	472.4	FEM	1154955	#N/A
OX359191.1	MSTRG.2958	Choren_v00_mik.OX359191.1G185.1	N/A	Choren_v00_mik.OX359191.1G185	109	62	0	71	0	104	4	0	0	0	48.4	21.6	FEM	2090491	#N/A
OX359191.1	MSTRG.2958	Choren_v00_mik.OX359191.1G185.1	N/A	Choren_v00_mik.OX359191.1G185	109	62	0	71	0	104	4	0	0	0	48.4	21.6	MAL	2661250	#N/A
OX359191.1	MSTRG.2985	Choren_v00_mik.OX359191.1G215.1	N/A	Choren_v00_mik.OX359191.1G215	533	99	86	89	636	521	85	15	41	88	288.6	150	MAL	460598	#N/A
OX359191.1	MSTRG.2985	Choren_v00_mik.OX359191.1G215.1	N/A	Choren_v00_mik.OX359191.1G215	533	99	86	89	636	521	85	15	41	88	288.6	150	MAL	789198	#N/A
OX359191.1	MSTRG.3026	Choren_v00_mik.OX359191.1G280.1	N/A	Choren_v00_mik.OX359191.1G280	3124	2034	1531	1424	1836	1834	588	391	513	876	1989.8	840.4	MAL	2333853	SACS_MOUSESacsin OS=Mus musculus OX=10090 GN=Sacs PE=1 SV=2
OX359191.1	MSTRG.3075	Choren_v00_mik.OX359191.1G325.1	N/A	Choren_v00_mik.OX359191.1G325	0	0	334	28	0	466	0	338	0	0	72.4	160.8	FEM	262814	#N/A
OX359191.1	MSTRG.3075	Choren_v00_mik.OX359191.1G325.1	N/A	Choren_v00_mik.OX359191.1G325	0	0	334	28	0	466	0	338	0	0	72.4	160.8	FEM	2693624	#N/A
OX359191.1	MSTRG.3075	Choren_v00_mik.OX359191.1G325.2	N/A	Choren_v00_mik.OX359191.1G325	4457	0	1199	315	0	0	0	0	0	0	1194.2	0	FEM	262814	#N/A
OX359191.1	MSTRG.3075	Choren_v00_mik.OX359191.1G325.2	N/A	Choren_v00_mik.OX359191.1G325	4457	0	1199	315	0	0	0	0	0	0	1194.2	0	FEM	2693624	#N/A
OX359191.1	MSTRG.3079	Choren_v00_mik.OX359191.1G326.1	N/A	Choren_v00_mik.OX359191.1G326	7163	1798	2579	2362	2519	1653	715	2313	5008	2640	3284.2	2465.8	FEM	2129430	#N/A
OX359191.1	MSTRG.3079	Choren_v00_mik.OX359191.1G326.1	N/A	Choren_v00_mik.OX359191.1G326	7163	1798	2579	2362	2519	1653	715	2313	5008	2640	3284.2	2465.8	FEM	2330896	#N/A
OX359191.1	MSTRG.3137	Choren_v00_mik.OX359191.1G388.1	N/A	Choren_v00_mik.OX359191.1G388	1728	755	3262	2644	1356	3217	993	6084	4607	10097	1949	4999.6	MAL	4571165	#N/A
OX359191.1	Choren_v00_mik.OX359191.1G421	Choren_v00_mik.OX359191.1G421.1	N/A	Choren_v00_mik.OX359191.1G421	0	0	0	0	0	0	0	0	0	0	0	0	FEM	3464790	#N/A
OX359191.1	Choren_v00_mik.OX359191.1G421	Choren_v00_mik.OX359191.1G421.1	N/A	Choren_v00_mik.OX359191.1G421	0	0	0	0	0	0	0	0	0	0	0	0	FEM	3703256	#N/A
OX359191.1	MSTRG.3261	Choren_v00_mik.OX359191.1G585.1	N/A	Choren_v00_mik.OX359191.1G585	0	0	0	0	0	0	0	0	0	0	0	0	MAL	3604408	POLR_DROMERetrovirus-related Pol polyprotein from type-2 retrotransposable element R2DM OS=Drosophila melanogaster OX=7227 GN=pol PE=4 SV=1
OX359191.1	MSTRG.3325	Choren_v00_mik.OX359191.1G612.1	N/A	Choren_v00_mik.OX359191.1G612	2796	415	1641	539	1148	534	301	3613	1158	4482	1307.8	2017.6	FEM	2376698	#N/A
OX359191.1	MSTRG.3331	Choren_v00_mik.OX359191.1G619.1	N/A	Choren_v00_mik.OX359191.1G619	99	0	231	8	33	10	0	25	0	50	74.2	17	FEM	596826	#N/A
OX359191.1	MSTRG.3325	Choren_v00_mik.OX359191.1G620.1	N/A	Choren_v00_mik.OX359191.1G620	0	0	0	0	0	0	0	0	2	0	0	0.4	FEM	1338306	#N/A
OX359191.1	MSTRG.3325	Choren_v00_mik.OX359191.1G625.1	N/A	Choren_v00_mik.OX359191.1G625	623	442	176	178	1104	820	67	195	273	244	504.6	319.8	FEM	2632230	DMBT1_HUMANDeleted in malignant brain tumors 1 protein OS=Homo sapiens OX=9606 GN=DMBT1 PE=1 SV=2
OX359191.1	MSTRG.3310	Choren_v00_mik.OX359191.1G638.1	N/A	Choren_v00_mik.OX359191.1G638	1695	1047	1733	1054	1475	550	130	76	925	67	1400.8	349.6	MAL	1785597	#N/A
OX359191.1	MSTRG.3300	Choren_v00_mik.OX359191.1G644.1	N/A	Choren_v00_mik.OX359191.1G644	1	24	3	0	0	2	0	0	3	0	5.6	1	FEM	4927053	#N/A
OX359191.1	MSTRG.3366	Choren_v00_mik.OX359191.1G682.1	N/A	Choren_v00_mik.OX359191.1G682	1575	1017	1578	1723	1468	1337	568	167	295	364	1472.2	546.2	MAL	6242793	#N/A
OX359191.1	MSTRG.3366	Choren_v00_mik.OX359191.1G682.2	N/A	Choren_v00_mik.OX359191.1G682	674	129	660	49	384	801	78	56	0	358	379.2	258.6	MAL	6242793	#N/A
OX359191.1	MSTRG.3366	Choren_v00_mik.OX359191.1G682.3	N/A	Choren_v00_mik.OX359191.1G682	16	132	27	0	114	43	118	0	0	0	57.8	32.2	MAL	6242793	#N/A
OX359191.1	MSTRG.3611	Choren_v00_mik.OX359191.1G972.1	N/A	Choren_v00_mik.OX359191.1G972	304	2207	3501	206	1671	2803	610	2803	9560	11039	1577.8	5363	MAL	1545956	#N/A
OX359191.1	MSTRG.2878	Choren_v00_mik.OX359191.1G98.1	N/A	Choren_v00_mik.OX359191.1G98	0	164	23	54	2	44	0	53	0	8	48.6	21	FEM	3660335	#N/A
OX359191.1	MSTRG.2878	Choren_v00_mik.OX359191.1G99.1	N/A	Choren_v00_mik.OX359191.1G99	0	56	615	7	0	0	0	3	0	151	135.6	30.8	FEM	3750097	#N/A
OX359192.1	MSTRG.4826	Choren_v00_mik.OX359192.1G1110.1	N/A	Choren_v00_mik.OX359192.1G1110	681	179	82	334	238	231	148	5302	1784	3228	302.8	2138.6	FEM	6242900	F227A_HUMANProtein FAM227A OS=Homo sapiens OX=9606 GN=FAM227A PE=1 SV=1
OX359192.1	MSTRG.4841	Choren_v00_mik.OX359192.1G1131.1	N/A	Choren_v00_mik.OX359192.1G1131	300	124	183	159	301	156	32	34	35	148	213.4	81	MAL	5474496	#N/A
OX359192.1	MSTRG.4877	Choren_v00_mik.OX359192.1G1172.1	N/A	Choren_v00_mik.OX359192.1G1172	17978	13255	11778	13216	15434	4541	3620	1223	8316	6663	14332.2	4872.6	MAL	5362235	T184A_BOVINTransmembrane protein 184A OS=Bos taurus OX=9913 GN=TMEM184A PE=1 SV=1
OX359192.1	MSTRG.4881	Choren_v00_mik.OX359192.1G1173.1	N/A	Choren_v00_mik.OX359192.1G1173	7935	2687	2768	3472	2989	2167	1085	689	1778	2160	3970.2	1575.8	MAL	2846007	GAB4_HUMANGRB2-associated-binding protein 4 OS=Homo sapiens OX=9606 GN=GAB4 PE=2 SV=1
OX359192.1	MSTRG.4892	Choren_v00_mik.OX359192.1G1189.1	N/A	Choren_v00_mik.OX359192.1G1189	15289	2727	4596	2164	4966	1917	597	891	2088	1838	5948.4	1466.2	MAL	5473865	#N/A
OX359192.1	MSTRG.4892	Choren_v00_mik.OX359192.1G1189.3	N/A	Choren_v00_mik.OX359192.1G1189	13408	2517	6064	2078	3787	1719	627	787	1460	1904	5570.8	1299.4	MAL	5473865	#N/A
OX359192.1	MSTRG.5032	Choren_v00_mik.OX359192.1G1341.1	N/A	Choren_v00_mik.OX359192.1G1341	11997	3270	2742	3232	4846	2699	2009	1123	1906	2390	5217.4	2025.4	FEM	1602786	#N/A
OX359192.1	MSTRG.5055	Choren_v00_mik.OX359192.1G1378.1	N/A	Choren_v00_mik.OX359192.1G1378	75446	13198	21148	15406	18849	8880	3792	19570	26074	24513	28809.4	16565.8	MAL	4704177	FLII_HUMANProtein flightless-1 homolog OS=Homo sapiens OX=9606 GN=FLII PE=1 SV=2
OX359192.1	MSTRG.4047	Choren_v00_mik.OX359192.1G172.1	N/A	Choren_v00_mik.OX359192.1G172	3229	1144	462	863	1663	569	552	339	592	647	1472.2	539.8	MAL	1669592	#N/A
OX359192.1	MSTRG.4052	Choren_v00_mik.OX359192.1G176.1	N/A	Choren_v00_mik.OX359192.1G176	2082	955	1308	843	921	208	106	580	673	943	1221.8	502	MAL	1651780	E2AK4_RATeIF-2-alpha kinase GCN2 OS=Rattus norvegicus OX=10116 GN=Eif2ak4 PE=3 SV=2
OX359192.1	MSTRG.4057	Choren_v00_mik.OX359192.1G180.1	N/A	Choren_v00_mik.OX359192.1G180	0	0	1	0	0	0	0	0	0	0	0.2	0	FEM	200365	#N/A
OX359192.1	MSTRG.4057	Choren_v00_mik.OX359192.1G180.1	N/A	Choren_v00_mik.OX359192.1G180	0	0	1	0	0	0	0	0	0	0	0.2	0	MAL	5496382	SCAP_XENLASterol regulatory element-binding protein cleavage-activating protein OS=Xenopus laevis OX=8355 GN=scap PE=2 SV=1
OX359192.1	MSTRG.4057	Choren_v00_mik.OX359192.1G180.2	N/A	Choren_v00_mik.OX359192.1G180	10843	2128	2754	2768	2423	1889	1023	1034	4108	1852	4183.2	1981.2	FEM	200365	SCAP_XENLASterol regulatory element-binding protein cleavage-activating protein OS=Xenopus laevis OX=8355 GN=scap PE=2 SV=1
OX359192.1	MSTRG.4057	Choren_v00_mik.OX359192.1G180.2	N/A	Choren_v00_mik.OX359192.1G180	10843	2128	2754	2768	2423	1889	1023	1034	4108	1852	4183.2	1981.2	MAL	5496382	SCAP_XENLASterol regulatory element-binding protein cleavage-activating protein OS=Xenopus laevis OX=8355 GN=scap PE=2 SV=1
OX359192.1	MSTRG.4056	Choren_v00_mik.OX359192.1G181.1	N/A	Choren_v00_mik.OX359192.1G181	81	0	177	713	98	92	57	0	0	75	213.8	44.8	MAL	531225	PLXA3_DANREPlexin A3 OS=Danio rerio OX=7955 GN=plxna3 PE=2 SV=2
OX359192.1	MSTRG.4056	Choren_v00_mik.OX359192.1G181.1	N/A	Choren_v00_mik.OX359192.1G181	81	0	177	713	98	92	57	0	0	75	213.8	44.8	MAL	3259526	PLXA3_DANREPlexin A3 OS=Danio rerio OX=7955 GN=plxna3 PE=2 SV=2
OX359192.1	MSTRG.4056	Choren_v00_mik.OX359192.1G181.1	N/A	Choren_v00_mik.OX359192.1G181	81	0	177	713	98	92	57	0	0	75	213.8	44.8	FEM	3260841	PLXA3_DANREPlexin A3 OS=Danio rerio OX=7955 GN=plxna3 PE=2 SV=2
OX359192.1	MSTRG.4056	Choren_v00_mik.OX359192.1G181.2	N/A	Choren_v00_mik.OX359192.1G181	49	0	3	12	5	0	3	0	0	31	13.8	6.8	MAL	531225	#N/A
OX359192.1	MSTRG.4056	Choren_v00_mik.OX359192.1G181.2	N/A	Choren_v00_mik.OX359192.1G181	49	0	3	12	5	0	3	0	0	31	13.8	6.8	MAL	3259526	#N/A
OX359192.1	MSTRG.4056	Choren_v00_mik.OX359192.1G181.2	N/A	Choren_v00_mik.OX359192.1G181	49	0	3	12	5	0	3	0	0	31	13.8	6.8	FEM	3260841	#N/A
OX359192.1	MSTRG.4056	Choren_v00_mik.OX359192.1G182.1	N/A	Choren_v00_mik.OX359192.1G182	1163	0	179	123	187	250	0	0	103	105	330.4	91.6	FEM	2554545	#N/A
OX359192.1	MSTRG.4056	Choren_v00_mik.OX359192.1G182.1	N/A	Choren_v00_mik.OX359192.1G182	1163	0	179	123	187	250	0	0	103	105	330.4	91.6	MAL	3791102	#N/A
OX359192.1	MSTRG.4060	Choren_v00_mik.OX359192.1G184.1	N/A	Choren_v00_mik.OX359192.1G184	33	4	1	1	1	8	1	0	3	1	8	2.6	FEM	3783831	#N/A
OX359192.1	MSTRG.4060	Choren_v00_mik.OX359192.1G184.2	N/A	Choren_v00_mik.OX359192.1G184	162	110	10	167	41	19	71	24	214	3	98	66.2	FEM	3783831	#N/A
OX359192.1	MSTRG.4064	Choren_v00_mik.OX359192.1G187.1	N/A	Choren_v00_mik.OX359192.1G187	15	7	46	15	82	3	2	34	114	46	33	39.8	MAL	3454253	#N/A
OX359192.1	MSTRG.4079	Choren_v00_mik.OX359192.1G195.1	N/A	Choren_v00_mik.OX359192.1G195	3053	1047	713	986	967	726	328	448	2003	604	1353.2	821.8	FEM	2757587	#N/A
OX359192.1	MSTRG.4079	Choren_v00_mik.OX359192.1G195.1	N/A	Choren_v00_mik.OX359192.1G195	3053	1047	713	986	967	726	328	448	2003	604	1353.2	821.8	MAL	2813931	#N/A
OX359192.1	MSTRG.4081	Choren_v00_mik.OX359192.1G196.1	N/A	Choren_v00_mik.OX359192.1G196	1009	5471	0	2985	2825	993	514	0	679	0	2458	437.2	FEM	2547011	#N/A
OX359192.1	MSTRG.4081	Choren_v00_mik.OX359192.1G197.1	N/A	Choren_v00_mik.OX359192.1G197	4588	6	0	0	7	10	325	0	1989	10	920.2	466.8	FEM	2657695	#N/A
OX359192.1	MSTRG.4081	Choren_v00_mik.OX359192.1G197.1	N/A	Choren_v00_mik.OX359192.1G197	4588	6	0	0	7	10	325	0	1989	10	920.2	466.8	FEM	4186216	#N/A
OX359192.1	MSTRG.4083	Choren_v00_mik.OX359192.1G198.1	N/A	Choren_v00_mik.OX359192.1G198	2578	585	485	831	1271	573	287	465	485	775	1150	517	MAL	2865525	#N/A
OX359192.1	MSTRG.4087	Choren_v00_mik.OX359192.1G208.1	N/A	Choren_v00_mik.OX359192.1G208	2862	370	620	613	878	334	90	532	912	1392	1068.6	652	MAL	1711174	#N/A
OX359192.1	MSTRG.4087	Choren_v00_mik.OX359192.1G208.1	N/A	Choren_v00_mik.OX359192.1G208	2862	370	620	613	878	334	90	532	912	1392	1068.6	652	MAL	1736923	#N/A
OX359192.1	MSTRG.4087	Choren_v00_mik.OX359192.1G208.2	N/A	Choren_v00_mik.OX359192.1G208	572	160	145	124	335	94	2	9	12	13	267.2	26	MAL	1711174	#N/A
OX359192.1	MSTRG.4087	Choren_v00_mik.OX359192.1G208.2	N/A	Choren_v00_mik.OX359192.1G208	572	160	145	124	335	94	2	9	12	13	267.2	26	MAL	1736923	#N/A
OX359192.1	MSTRG.4087	Choren_v00_mik.OX359192.1G208.3	N/A	Choren_v00_mik.OX359192.1G208	424	35	126	31	0	40	0	0	0	0	123.2	8	MAL	1711174	#N/A
OX359192.1	MSTRG.4087	Choren_v00_mik.OX359192.1G208.3	N/A	Choren_v00_mik.OX359192.1G208	424	35	126	31	0	40	0	0	0	0	123.2	8	MAL	1736923	#N/A
OX359192.1	MSTRG.4087	Choren_v00_mik.OX359192.1G208.4	N/A	Choren_v00_mik.OX359192.1G208	482	176	192	75	0	12	86	0	248	58	185	80.8	MAL	1711174	#N/A
OX359192.1	MSTRG.4087	Choren_v00_mik.OX359192.1G208.4	N/A	Choren_v00_mik.OX359192.1G208	482	176	192	75	0	12	86	0	248	58	185	80.8	MAL	1736923	#N/A
OX359192.1	MSTRG.4136	Choren_v00_mik.OX359192.1G264.1	N/A	Choren_v00_mik.OX359192.1G264	467	0	93	80	0	73	9	0	0	18	128	20	FEM	2087583	#N/A
OX359192.1	MSTRG.4136	Choren_v00_mik.OX359192.1G264.2	N/A	Choren_v00_mik.OX359192.1G264	4497	1095	2275	1620	1106	520	191	183	75	762	2118.6	346.2	FEM	2087583	HTK16_HYDVUTyrosine-protein kinase HTK16 OS=Hydra vulgaris OX=6087 GN=HTK16 PE=2 SV=1
OX359192.1	MSTRG.4173	Choren_v00_mik.OX359192.1G318.1	N/A	Choren_v00_mik.OX359192.1G318	8627	3183	452	570	3982	3162	1188	6819	5465	2173	3362.8	3761.4	MAL	382591	TRIP4_MOUSEActivating signal cointegrator 1 OS=Mus musculus OX=10090 GN=Trip4 PE=1 SV=2
OX359192.1	MSTRG.4173	Choren_v00_mik.OX359192.1G318.2	N/A	Choren_v00_mik.OX359192.1G318	10094	1415	4491	3259	3390	1104	97	1108	466	5325	4529.8	1620	MAL	382591	#N/A
OX359192.1	MSTRG.4215	Choren_v00_mik.OX359192.1G355.1	N/A	Choren_v00_mik.OX359192.1G355	0	0	0	0	0	0	0	0	0	0	0	0	FEM	3756409	#N/A
OX359192.1	MSTRG.4215	Choren_v00_mik.OX359192.1G355.2	N/A	Choren_v00_mik.OX359192.1G355	0	0	0	61	668	0	11	0	0	3	145.8	2.8	FEM	3756409	#N/A
OX359192.1	MSTRG.4215	Choren_v00_mik.OX359192.1G355.3	N/A	Choren_v00_mik.OX359192.1G355	1	340	0	0	0	0	0	4	0	0	68.2	0.8	FEM	3756409	#N/A
OX359192.1	MSTRG.4195	Choren_v00_mik.OX359192.1G376.1	N/A	Choren_v00_mik.OX359192.1G376	26	11	7	5	2	8	0	24	12	27	10.2	14.2	MAL	1169122	NDUS7_MOUSENADH dehydrogenase
OX359192.1	MSTRG.4290	Choren_v00_mik.OX359192.1G416.1	N/A	Choren_v00_mik.OX359192.1G416	122	10	132	33	136	0	0	12	56	48	86.6	23.2	FEM	2981175	#N/A
OX359192.1	MSTRG.4238	Choren_v00_mik.OX359192.1G429.1	N/A	Choren_v00_mik.OX359192.1G429	838	735	304	5880	3465	5685	2142	1893	633	216	2244.4	2113.8	FEM	692705	#N/A
OX359192.1	MSTRG.4238	Choren_v00_mik.OX359192.1G429.1	N/A	Choren_v00_mik.OX359192.1G429	838	735	304	5880	3465	5685	2142	1893	633	216	2244.4	2113.8	FEM	1552951	#N/A
OX359192.1	MSTRG.4238	Choren_v00_mik.OX359192.1G429.1	N/A	Choren_v00_mik.OX359192.1G429	838	735	304	5880	3465	5685	2142	1893	633	216	2244.4	2113.8	FEM	1978777	#N/A
OX359192.1	MSTRG.4238	Choren_v00_mik.OX359192.1G429.1	N/A	Choren_v00_mik.OX359192.1G429	838	735	304	5880	3465	5685	2142	1893	633	216	2244.4	2113.8	FEM	2482557	#N/A
OX359192.1	MSTRG.4238	Choren_v00_mik.OX359192.1G429.1	N/A	Choren_v00_mik.OX359192.1G429	838	735	304	5880	3465	5685	2142	1893	633	216	2244.4	2113.8	FEM	6163834	#N/A
OX359192.1	MSTRG.4237	Choren_v00_mik.OX359192.1G432.1	N/A	Choren_v00_mik.OX359192.1G432	2805	804	1655	620	963	542	223	2841	812	3421	1369.4	1567.8	MAL	2238841	#N/A
OX359192.1	MSTRG.4253	Choren_v00_mik.OX359192.1G447.1	N/A	Choren_v00_mik.OX359192.1G447	19197	5109	8385	7424	5926	5354	1692	6624	14825	10078	9208.2	7714.6	FEM	3168852	PR6AA_XENLA26S proteasome regulatory subunit 6A-A OS=Xenopus laevis OX=8355 GN=psmc3-a PE=2 SV=2
OX359192.1	MSTRG.4367	Choren_v00_mik.OX359192.1G464.1	N/A	Choren_v00_mik.OX359192.1G464	129	49	0	561	336	40	28	26	361	145	215	120	FEM	4412633	#N/A
OX359192.1	MSTRG.4338	Choren_v00_mik.OX359192.1G520.1	N/A	Choren_v00_mik.OX359192.1G520	62	5	12	13	71	5	10	5	17	26	32.6	12.6	MAL	3728609	PO21_NASVIRetrovirus-related Pol polyprotein from type-1 retrotransposable element R2 (Fragment) OS=Nasonia vitripennis OX=7425 PE=4 SV=2
OX359192.1	MSTRG.4399	Choren_v00_mik.OX359192.1G592.1	N/A	Choren_v00_mik.OX359192.1G592	318	5	642	146	178	162	2	59	52	3	257.8	55.6	MAL	1954335	#N/A
OX359192.1	MSTRG.4399	Choren_v00_mik.OX359192.1G593.1	N/A	Choren_v00_mik.OX359192.1G593	536	243	5422	3066	1976	75	0	164	278	4333	2248.6	970	FEM	2073158	UN13B_MOUSEProtein unc-13 homolog B OS=Mus musculus OX=10090 GN=Unc13b PE=1 SV=2
OX359192.1	MSTRG.4392	Choren_v00_mik.OX359192.1G620.1	N/A	Choren_v00_mik.OX359192.1G620	0	0	0	0	0	0	0	0	0	0	0	0	MAL	1421895	#N/A
OX359192.1	MSTRG.4431	Choren_v00_mik.OX359192.1G644.1	N/A	Choren_v00_mik.OX359192.1G644	47	1	1	167	7	5	18	20187	378	1181	44.6	4353.8	FEM	1299610	HEAT4_HUMANHEAT repeat-containing protein 4 OS=Homo sapiens OX=9606 GN=HEATR4 PE=2 SV=2
OX359192.1	MSTRG.4448	Choren_v00_mik.OX359192.1G667.1	N/A	Choren_v00_mik.OX359192.1G667	524	166	1308	167	1023	796	0	113	0	668	637.6	315.4	MAL	2065520	#N/A
OX359192.1	MSTRG.4469	Choren_v00_mik.OX359192.1G683.1	N/A	Choren_v00_mik.OX359192.1G683.1	95	6	79	23	20	5	38	9	11	15	44.6	15.6	MAL	2180495	#N/A
OX359192.1	MSTRG.4469	Choren_v00_mik.OX359192.1G683.1	N/A	Choren_v00_mik.OX359192.1G683.1	95	6	79	23	20	5	38	9	11	15	44.6	15.6	MAL	2910898	#N/A
OX359192.1	MSTRG.4474	Choren_v00_mik.OX359192.1G685.1	N/A	Choren_v00_mik.OX359192.1G685	0	0	0	0	0	0	0	0	0	0	0	0	MAL	2906762	FAT4_MOUSEProtocadherin Fat 4 OS=Mus musculus OX=10090 GN=Fat4 PE=1 SV=2
OX359192.1	MSTRG.4544	Choren_v00_mik.OX359192.1G761.1	N/A	Choren_v00_mik.OX359192.1G761	0	1	0	1356	0	0	0	0	1	0	271.4	0.2	MAL	5526514	#N/A
OX359192.1	MSTRG.4570	Choren_v00_mik.OX359192.1G784.1	N/A	Choren_v00_mik.OX359192.1G784	16546	2198	6684	1225	10196	1693	1294	11025	5299	11995	7369.8	6261.2	MAL	2519457	CSKI1_RATCaskin-1 OS=Rattus norvegicus OX=10116 GN=Caskin1 PE=1 SV=1
OX359192.1	MSTRG.4570	Choren_v00_mik.OX359192.1G784.2	N/A	Choren_v00_mik.OX359192.1G784	201	96	90	123	5	47	1042	621	241	92	103	408.6	MAL	2519457	#N/A
OX359192.1	MSTRG.4570	Choren_v00_mik.OX359192.1G784.3	N/A	Choren_v00_mik.OX359192.1G784	28957	1644	6935	592	4776	1552	1298	2448	5198	4382	8580.8	2975.6	MAL	2519457	#N/A
OX359192.1	MSTRG.4570	Choren_v00_mik.OX359192.1G784.4	N/A	Choren_v00_mik.OX359192.1G784	21207	157	2498	811	306	254	366	1237	4856	449	4995.8	1432.4	MAL	2519457	#N/A
OX359192.1	MSTRG.4570	Choren_v00_mik.OX359192.1G784.5	N/A	Choren_v00_mik.OX359192.1G784	16034	1836	8632	894	10785	1811	1314	11417	5098	11817	7636.2	6291.4	MAL	2519457	#N/A
OX359192.1	MSTRG.4649	Choren_v00_mik.OX359192.1G891.1	N/A	Choren_v00_mik.OX359192.1G891	32540	5864	9702	5084	7939	2555	1422	1492	1867	3908	12225.8	2248.8	MAL	2197564	#N/A
OX359192.1	MSTRG.4700	Choren_v00_mik.OX359192.1G935.1	N/A	Choren_v00_mik.OX359192.1G935	4	0	1	0	1	0	0	0	0	2	1.2	0.4	MAL	5697661	#N/A
OX359192.1	MSTRG.4700	Choren_v00_mik.OX359192.1G935.2	N/A	Choren_v00_mik.OX359192.1G935	167	66	25	105	89	236	54	18	0	12	90.4	64	MAL	5697661	#N/A
OX359192.1	MSTRG.4700	Choren_v00_mik.OX359192.1G935.3	N/A	Choren_v00_mik.OX359192.1G935	642	223	126	317	121	98	4	3	47	78	285.8	46	MAL	5697661	#N/A
OX359192.1	MSTRG.4692	Choren_v00_mik.OX359192.1G974.1	N/A	Choren_v00_mik.OX359192.1G974	8447	1382	2929	1867	2347	714	311	781	1353	935	3394.4	818.8	MAL	2481159	EAF6_CHICKChromatin modification-related protein MEAF6 OS=Gallus gallus OX=9031 GN=MEAF6 PE=2 SV=1
OX359192.1	MSTRG.4692	Choren_v00_mik.OX359192.1G974.2	N/A	Choren_v00_mik.OX359192.1G974	2149	346	637	484	693	100	36	141	243	277	861.8	159.4	MAL	2481159	#N/A
OX359192.1	MSTRG.4724	Choren_v00_mik.OX359192.1G988.1	N/A	Choren_v00_mik.OX359192.1G988	7887	1725	3511	3405	2597	1696	695	4636	3036	3385	3825	2689.6	FEM	669669	RN157_XENLAE3 ubiquitin ligase Rnf157 OS=Xenopus laevis OX=8355 GN=rnf157 PE=2 SV=1
OX359192.1	MSTRG.4724	Choren_v00_mik.OX359192.1G988.1	N/A	Choren_v00_mik.OX359192.1G988	7887	1725	3511	3405	2597	1696	695	4636	3036	3385	3825	2689.6	MAL	3376899	RN157_XENLAE3 ubiquitin ligase Rnf157 OS=Xenopus laevis OX=8355 GN=rnf157 PE=2 SV=1
OX359193.1	MSTRG.5953	Choren_v00_mik.OX359193.1G1024.1	N/A	Choren_v00_mik.OX359193.1G1024	0	0	0	0	0	0	0	0	0	0	0	0	MAL	2316704	#N/A
OX359193.1	MSTRG.5980	Choren_v00_mik.OX359193.1G1045.1	N/A	Choren_v00_mik.OX359193.1G1045	7776	1206	802	1912	1743	1539	464	5629	804	2763	2687.8	2239.8	MAL	2965750	#N/A
OX359193.1	MSTRG.5976	Choren_v00_mik.OX359193.1G1047.1	N/A	Choren_v00_mik.OX359193.1G1047	410	94	65	16	43	59	21	249	645	30	125.6	200.8	FEM	485176	#N/A
OX359193.1	MSTRG.5976	Choren_v00_mik.OX359193.1G1047.2	N/A	Choren_v00_mik.OX359193.1G1047	22	2	48	0	1	10	0	2	2	0	14.6	2.8	FEM	485176	#N/A
OX359193.1	MSTRG.5991	Choren_v00_mik.OX359193.1G1057.1	N/A	Choren_v00_mik.OX359193.1G1057	48997	7719	11410	10614	10885	2916	886	1828	1387	2177	17925	1838.8	MAL	1712909	#N/A
OX359193.1	MSTRG.6089	Choren_v00_mik.OX359193.1G1152.1	N/A	Choren_v00_mik.OX359193.1G1152	0	0	0	0	0	8	0	5	0	0	0	2.6	MAL	1907739	DGLB_HUMANDiacylglycerol lipase-beta OS=Homo sapiens OX=9606 GN=DAGLB PE=1 SV=2
OX359193.1	MSTRG.6140	Choren_v00_mik.OX359193.1G1224.1	N/A	Choren_v00_mik.OX359193.1G1224	8627	2512	4967	808	2805	1918	247	642	2590	1240	3943.8	1327.4	MAL	3451117	HTK16_HYDVUTyrosine-protein kinase HTK16 OS=Hydra vulgaris OX=6087 GN=HTK16 PE=2 SV=1
OX359193.1	MSTRG.6140	Choren_v00_mik.OX359193.1G1224.1	N/A	Choren_v00_mik.OX359193.1G1224	8627	2512	4967	808	2805	1918	247	642	2590	1240	3943.8	1327.4	MAL	3556571	HTK16_HYDVUTyrosine-protein kinase HTK16 OS=Hydra vulgaris OX=6087 GN=HTK16 PE=2 SV=1
OX359193.1	MSTRG.6195	Choren_v00_mik.OX359193.1G1286.1	N/A	Choren_v00_mik.OX359193.1G1286	172	87	228	334	195	216	52	34	100	278	203.2	136	MAL	5045988	#N/A
OX359193.1	MSTRG.6198	Choren_v00_mik.OX359193.1G1289.1	N/A	Choren_v00_mik.OX359193.1G1289	2398	3380	409	2722	1768	1726	2000	0	0	315	2135.4	808.2	FEM	4511005	NPNT_HUMANNephronectin OS=Homo sapiens OX=9606 GN=NPNT PE=2 SV=3
OX359193.1	MSTRG.6198	Choren_v00_mik.OX359193.1G1289.2	N/A	Choren_v00_mik.OX359193.1G1289	1605	0	0	0	871	556	1059	0	0	0	495.2	323	FEM	4511005	NPNT_HUMANNephronectin OS=Homo sapiens OX=9606 GN=NPNT PE=2 SV=3
OX359193.1	MSTRG.6198	Choren_v00_mik.OX359193.1G1289.3	N/A	Choren_v00_mik.OX359193.1G1289	2608	0	3195	4519	1204	827	1476	1259	1135	2558	2305.2	1451	FEM	4511005	NPNT_HUMANNephronectin OS=Homo sapiens OX=9606 GN=NPNT PE=2 SV=3
OX359193.1	MSTRG.5207	Choren_v00_mik.OX359193.1G132.1	N/A	Choren_v00_mik.OX359193.1G132	1365	461	652	442	420	193	156	776	401	1199	668	545	MAL	2680686	#N/A
OX359193.1	MSTRG.6210	Choren_v00_mik.OX359193.1G1326.1	N/A	Choren_v00_mik.OX359193.1G1326	0	0	0	0	0	0	0	0	0	0	0	0	MAL	2501788	#N/A
OX359193.1	MSTRG.6214	Choren_v00_mik.OX359193.1G1329.1	N/A	Choren_v00_mik.OX359193.1G1329	5662	3291	1004	1514	5683	1671	1170	13446	8818	19282	3430.8	8877.4	MAL	497866	#N/A
OX359193.1	MSTRG.5210	Choren_v00_mik.OX359193.1G133.1	N/A	Choren_v00_mik.OX359193.1G133	1374	302	43	29	128	9	2	1075	222	287	375.2	319	FEM	2877681	#N/A
OX359193.1	MSTRG.6207	Choren_v00_mik.OX359193.1G1346.1	N/A	Choren_v00_mik.OX359193.1G1346.1	63	7	5	9	10	0	0	0	6	0	18.8	1.2	MAL	4406293	#N/A
OX359193.1	MSTRG.6207	Choren_v00_mik.OX359193.1G1346.2	N/A	Choren_v00_mik.OX359193.1G1346.2	103	57	63	35	3	1	2	2	13	17	52.2	7	MAL	4406293	#N/A
OX359193.1	MSTRG.6207	Choren_v00_mik.OX359193.1G1346.3	N/A	Choren_v00_mik.OX359193.1G1346.3	145	4	34	35	20	11	3	0	0	0	47.6	2.8	MAL	4406293	#N/A
OX359193.1	MSTRG.6207	Choren_v00_mik.OX359193.1G1346.4	N/A	Choren_v00_mik.OX359193.1G1346.4	0	0	0	0	0	0	0	0	0	0	0	0	MAL	4406293	#N/A
OX359193.1	MSTRG.6206	Choren_v00_mik.OX359193.1G1348.1	N/A	Choren_v00_mik.OX359193.1G1348	15805	911	6326	4861	9427	0	0	0	0	0	7466	0	MAL	4406293	PCSK9_ATEGEProprotein convertase subtilisin/kexin type 9 OS=Ateles geoffroyi OX=9509 GN=PCSK9 PE=2 SV=1
OX359193.1	MSTRG.6240	Choren_v00_mik.OX359193.1G1349.1	N/A	Choren_v00_mik.OX359193.1G1349	4627	1286	549	767	106	460	66	27	108	277	1467	187.6	MAL	999078	#N/A
OX359193.1	MSTRG.5216	Choren_v00_mik.OX359193.1G142.1	N/A	Choren_v00_mik.OX359193.1G142	1865	233	762	411	700	177	241	3714	479	2199	794.2	1362	MAL	3320958	#N/A
OX359193.1	MSTRG.5216	Choren_v00_mik.OX359193.1G142.1	N/A	Choren_v00_mik.OX359193.1G142	1865	233	762	411	700	177	241	3714	479	2199	794.2	1362	MAL	3422150	#N/A
OX359193.1	MSTRG.6305	Choren_v00_mik.OX359193.1G1422.1	N/A	Choren_v00_mik.OX359193.1G1422	270	39	165	226	141	114	30	26	100	31	168.2	60.2	FEM	2439232	DOC11_MOUSEDedicator of cytokinesis protein 11 OS=Mus musculus OX=10090 GN=Dock11 PE=1 SV=1
OX359193.1	MSTRG.5219	Choren_v00_mik.OX359193.1G144.1	N/A	Choren_v00_mik.OX359193.1G144	0	0	0	0	0	0	0	0	0	0	0	0	MAL	2685727	#N/A
OX359193.1	MSTRG.5219	Choren_v00_mik.OX359193.1G144.1	N/A	Choren_v00_mik.OX359193.1G144	0	0	0	0	0	0	0	0	0	0	0	0	MAL	3191514	#N/A
OX359193.1	MSTRG.6336	Choren_v00_mik.OX359193.1G1459.1	N/A	Choren_v00_mik.OX359193.1G1459	7929	71	11	3376	3569	2162	1608	3873	172	5819	2991.2	2726.8	MAL	4509980	DI3L2_XENTRDIS3-like exonuclease 2 OS=Xenopus tropicalis OX=8364 GN=dis3l2 PE=2 SV=2
OX359193.1	MSTRG.6332	Choren_v00_mik.OX359193.1G1482.1	N/A	Choren_v00_mik.OX359193.1G1482	656	14	7	106	14	11	16	326321	10183	271172	159.4	121541	MAL	3393149	NCKX3_HUMANSodium/potassium/calcium exchanger 3 OS=Homo sapiens OX=9606 GN=SLC24A3 PE=2 SV=4
OX359193.1	MSTRG.5228	Choren_v00_mik.OX359193.1G154.1	N/A	Choren_v00_mik.OX359193.1G154	996	893	3337	212	374	39	211	2	56	7	1162.4	63	MAL	2089159	RECK_MOUSEReversion-inducing cysteine-rich protein with Kazal motifs OS=Mus musculus OX=10090 GN=Reck PE=1 SV=2
OX359193.1	MSTRG.5099	Choren_v00_mik.OX359193.1G16.1	N/A	Choren_v00_mik.OX359193.1G16	56	0	0	37	33	0	0	0	45	1265	25.2	262	MAL	3357593	CTRO_HUMANCitron Rho-interacting kinase OS=Homo sapiens OX=9606 GN=CIT PE=1 SV=2
OX359193.1	MSTRG.5353	Choren_v00_mik.OX359193.1G296.1	N/A	Choren_v00_mik.OX359193.1G296	22446	5174	4851	3030	4679	13212	3438	24290	24916	33259	8036	19823	MAL	1488220	#N/A
OX359193.1	MSTRG.5360	Choren_v00_mik.OX359193.1G301.1	N/A	Choren_v00_mik.OX359193.1G301	9978	1069	2401	2373	3215	2559	1145	67845	23245	71679	3807.2	33294.6	MAL	1968464	#N/A
OX359193.1	MSTRG.5360	Choren_v00_mik.OX359193.1G301.1	N/A	Choren_v00_mik.OX359193.1G301	9978	1069	2401	2373	3215	2559	1145	67845	23245	71679	3807.2	33294.6	MAL	2850746	#N/A
OX359193.1	MSTRG.5368	Choren_v00_mik.OX359193.1G311.1	N/A	Choren_v00_mik.OX359193.1G311	1698	37	206	0	905	210	0	714	3106	38	569.2	813.6	MAL	2897725	MTBP_XENLAMdm2-binding protein OS=Xenopus laevis OX=8355 GN=mtbp PE=2 SV=1
OX359193.1	MSTRG.5368	Choren_v00_mik.OX359193.1G311.1	N/A	Choren_v00_mik.OX359193.1G311	1698	37	206	0	905	210	0	714	3106	38	569.2	813.6	MAL	2900620	MTBP_XENLAMdm2-binding protein OS=Xenopus laevis OX=8355 GN=mtbp PE=2 SV=1
OX359193.1	MSTRG.5414	Choren_v00_mik.OX359193.1G357.1	N/A	Choren_v00_mik.OX359193.1G357	20897	3678	8782	6955	9159	6681	1999	10361	5300	9814	9894.2	6831	MAL	3362123	#N/A
OX359193.1	MSTRG.5414	Choren_v00_mik.OX359193.1G357.1	N/A	Choren_v00_mik.OX359193.1G357	20897	3678	8782	6955	9159	6681	1999	10361	5300	9814	9894.2	6831	FEM	6139599	#N/A
OX359193.1	MSTRG.5414	Choren_v00_mik.OX359193.1G357.2	N/A	Choren_v00_mik.OX359193.1G357	694	0	145	154	214	30	2	749	79	128	241.4	197.6	MAL	3362123	#N/A
OX359193.1	MSTRG.5414	Choren_v00_mik.OX359193.1G357.2	N/A	Choren_v00_mik.OX359193.1G357	694	0	145	154	214	30	2	749	79	128	241.4	197.6	FEM	6139599	#N/A
OX359193.1	MSTRG.5417	Choren_v00_mik.OX359193.1G358.1	N/A	Choren_v00_mik.OX359193.1G358	3974	1504	386	1578	775	319	455	1144	1636	593	1643.4	829.4	MAL	3323808	#N/A
OX359193.1	MSTRG.5507	Choren_v00_mik.OX359193.1G450.1	N/A	Choren_v00_mik.OX359193.1G450	118	60	119	312	31	50	9	18	62	30	128	33.8	MAL	270078	#N/A
OX359193.1	MSTRG.5629	Choren_v00_mik.OX359193.1G632.1	N/A	Choren_v00_mik.OX359193.1G632	210	0	55	0	52	81	19	3	70	0	63.4	34.6	FEM	1756908	#N/A
OX359193.1	MSTRG.5676	Choren_v00_mik.OX359193.1G719.1	N/A	Choren_v00_mik.OX359193.1G719	154	207	0	217	0	78	17	0	222	0	115.6	63.4	FEM	1337694	VPS53_CHICKVacuolar protein sorting-associated protein 53 homolog OS=Gallus gallus OX=9031 GN=VPS53 PE=2 SV=1
OX359193.1	MSTRG.5675	Choren_v00_mik.OX359193.1G726.1	N/A	Choren_v00_mik.OX359193.1G726	9144	2826	3227	2481	3684	2201	900	717	1713	2135	4272.4	1533.2	MAL	3331252	#N/A
OX359193.1	MSTRG.5680	Choren_v00_mik.OX359193.1G728.1	N/A	Choren_v00_mik.OX359193.1G728	84	0	74	0	52	0	0	4	0	0	42	0.8	MAL	702921	HIP1_MOUSEHuntingtin-interacting protein 1 OS=Mus musculus OX=10090 GN=Hip1 PE=1 SV=2
OX359193.1	MSTRG.5685	Choren_v00_mik.OX359193.1G739.1	N/A	Choren_v00_mik.OX359193.1G739	69	3	18	5	10	14	0	70	438	29	21	110.2	MAL	1451758	#N/A
OX359193.1	MSTRG.5805	Choren_v00_mik.OX359193.1G859.1	N/A	Choren_v00_mik.OX359193.1G859	3944	104	0	1180	948	713	0	0	65129	0	1235.2	13168.4	MAL	228454	#N/A
OX359193.1	MSTRG.5804	Choren_v00_mik.OX359193.1G867.1	N/A	Choren_v00_mik.OX359193.1G867	17452	3334	4719	3470	4207	2282	1317	1581	3168	3092	6636.4	2288	MAL	228454	#N/A
OX359193.1	MSTRG.5816	Choren_v00_mik.OX359193.1G874.1	N/A	Choren_v00_mik.OX359193.1G874.1	562	9	0	0	0	0	198	0	0	0	114.2	39.6	MAL	4876382	#N/A
OX359193.1	MSTRG.5815	Choren_v00_mik.OX359193.1G876.1	N/A	Choren_v00_mik.OX359193.1G876	507	7	81	48	311	20	0	11	8	7	190.8	9.2	MAL	3361264	#N/A
OX359193.1	MSTRG.5819	Choren_v00_mik.OX359193.1G880.1	N/A	Choren_v00_mik.OX359193.1G880.1	268	0	46	84	58	0	0	0	19	68	91.2	17.4	MAL	1612702	#N/A
OX359193.1	MSTRG.5819	Choren_v00_mik.OX359193.1G880.1	N/A	Choren_v00_mik.OX359193.1G880.1	268	0	46	84	58	0	0	0	19	68	91.2	17.4	MAL	2287600	#N/A
OX359193.1	MSTRG.5817	Choren_v00_mik.OX359193.1G885.1	N/A	Choren_v00_mik.OX359193.1G885	77	150	45	47	222	117	267	21	223	96	108.2	144.8	MAL	3424211	#N/A
OX359193.1	MSTRG.5856	Choren_v00_mik.OX359193.1G913.1	N/A	Choren_v00_mik.OX359193.1G913	7132	2486	2484	2630	2312	1835	1259	6165	4675	4467	3408.8	3680.2	MAL	330833	#N/A
OX359193.1	MSTRG.5856	Choren_v00_mik.OX359193.1G913.1	N/A	Choren_v00_mik.OX359193.1G913	7132	2486	2484	2630	2312	1835	1259	6165	4675	4467	3408.8	3680.2	MAL	2644281	#N/A
OX359193.1	MSTRG.5853	Choren_v00_mik.OX359193.1G915.1	N/A	Choren_v00_mik.OX359193.1G915	976	551	357	779	139	181	111	79	132	245	560.4	149.6	FEM	1826782	#N/A
OX359193.1	MSTRG.5853	Choren_v00_mik.OX359193.1G915.1	N/A	Choren_v00_mik.OX359193.1G915	976	551	357	779	139	181	111	79	132	245	560.4	149.6	MAL	3839379	#N/A
OX359193.1	MSTRG.5863	Choren_v00_mik.OX359193.1G922.1	N/A	Choren_v00_mik.OX359193.1G922	5195	857	1511	1282	1418	989	437	23940	4844	20990	2052.6	10240	MAL	3396856	#N/A
OX359193.1	MSTRG.5907	Choren_v00_mik.OX359193.1G972.1	N/A	Choren_v00_mik.OX359193.1G972	2669	78	846	817	496	1422	64	122	117	246	981.2	394.2	MAL	3994221	#N/A
OX359193.1	MSTRG.5927	Choren_v00_mik.OX359193.1G992.1	N/A	Choren_v00_mik.OX359193.1G992	470	169	121	3669	152	93	169	141	362	172	916.2	187.4	MAL	3833236	#N/A
OX359193.1	MSTRG.5927	Choren_v00_mik.OX359193.1G992.1	N/A	Choren_v00_mik.OX359193.1G992	470	169	121	3669	152	93	169	141	362	172	916.2	187.4	FEM	5503325	#N/A
OX359194.1	MSTRG.7262	Choren_v00_mik.OX359194.1G1000.1	N/A	Choren_v00_mik.OX359194.1G1000	7205	338	2305	3686	2449	1010	1355	4722	814	0	3196.6	1580.2	MAL	1527360	RBGPR_HUMANRab3 GTPase-activating protein non-catalytic subunit OS=Homo sapiens OX=9606 GN=RAB3GAP2 PE=1 SV=1
OX359194.1	MSTRG.7265	Choren_v00_mik.OX359194.1G1007.1	N/A	Choren_v00_mik.OX359194.1G1007	2981	345	576	432	240	5	17	16	353	37	914.8	85.6	MAL	3355219	#N/A
OX359194.1	MSTRG.7265	Choren_v00_mik.OX359194.1G1007.2	N/A	Choren_v00_mik.OX359194.1G1007	24901	5758	7623	5652	7051	4104	2300	1545	7691	3333	10197	3794.6	MAL	3355219	#N/A
OX359194.1	MSTRG.7282	Choren_v00_mik.OX359194.1G1017.1	N/A	Choren_v00_mik.OX359194.1G1017	210	0	35	0	0	0	0	0	1	4	49	1	MAL	4416649	-
OX359194.1	MSTRG.7282	Choren_v00_mik.OX359194.1G1017.2	N/A	Choren_v00_mik.OX359194.1G1017	74	0	0	0	0	0	0	0	0	0	14.8	0	MAL	4416649	-
OX359194.1	MSTRG.7282	Choren_v00_mik.OX359194.1G1017.3	N/A	Choren_v00_mik.OX359194.1G1017	4357	791	1050	884	1269	922	372	1358	1519	1485	1670.2	1131.2	MAL	4416649	-
OX359194.1	MSTRG.7305	Choren_v00_mik.OX359194.1G1032.1	N/A	Choren_v00_mik.OX359194.1G1032	21743	4330	9849	3830	6972	6123	2689	3023	5104	2324	9344.8	3852.6	MAL	3369589	HMCN1_MOUSEHemicentin-1 OS=Mus musculus OX=10090 GN=Hmcn1 PE=1 SV=1
OX359194.1	MSTRG.7299	Choren_v00_mik.OX359194.1G1037.1	N/A	Choren_v00_mik.OX359194.1G1037	26137	7311	10133	7234	12751	5870	3292	3801	3636	7637	12713.2	4847.2	MAL	2828442	#N/A
OX359194.1	MSTRG.6864	Choren_v00_mik.OX359194.1G113.1	N/A	Choren_v00_mik.OX359194.1G113	2472	5587	4881	2555	2158	636	191	1295	644	1101	3530.6	773.4	FEM	2522557	PTPRF_MOUSEReceptor-type tyrosine-protein phosphatase F OS=Mus musculus OX=10090 GN=Ptprf PE=1 SV=1
OX359194.1	MSTRG.6446	Choren_v00_mik.OX359194.1G151.2	N/A	Choren_v00_mik.OX359194.1G151	3076	22	3860	758	5	3	0	0	3	214	1544.2	44	MAL	2608932	#N/A
OX359194.1	MSTRG.6446	Choren_v00_mik.OX359194.1G151.2	N/A	Choren_v00_mik.OX359194.1G151	3076	22	3860	758	5	3	0	0	3	214	1544.2	44	MAL	2725383	#N/A
OX359194.1	MSTRG.6446	Choren_v00_mik.OX359194.1G151.3	N/A	Choren_v00_mik.OX359194.1G151	35	0	11	13	0	8	0	0	7	0	11.8	3	MAL	2608932	#N/A
OX359194.1	MSTRG.6446	Choren_v00_mik.OX359194.1G151.3	N/A	Choren_v00_mik.OX359194.1G151	35	0	11	13	0	8	0	0	7	0	11.8	3	MAL	2725383	#N/A
OX359194.1	MSTRG.6446	Choren_v00_mik.OX359194.1G151.4	N/A	Choren_v00_mik.OX359194.1G151	756	5	153	29	20	2	21	5	152	561	192.6	148.2	MAL	2608932	#N/A
OX359194.1	MSTRG.6446	Choren_v00_mik.OX359194.1G151.4	N/A	Choren_v00_mik.OX359194.1G151	756	5	153	29	20	2	21	5	152	561	192.6	148.2	MAL	2725383	#N/A
OX359194.1	MSTRG.6468	Choren_v00_mik.OX359194.1G173.1	N/A	Choren_v00_mik.OX359194.1G173	452	94	427	40	267	52	79	398	80	73	256	136.4	MAL	1068873	DOXA1_XENLADual oxidase maturation factor 1 OS=Xenopus laevis OX=8355 GN=duoxa1 PE=2 SV=1
OX359194.1	MSTRG.6468	Choren_v00_mik.OX359194.1G173.1	N/A	Choren_v00_mik.OX359194.1G173	452	94	427	40	267	52	79	398	80	73	256	136.4	MAL	1730608	DOXA1_XENLADual oxidase maturation factor 1 OS=Xenopus laevis OX=8355 GN=duoxa1 PE=2 SV=1
OX359194.1	MSTRG.6468	Choren_v00_mik.OX359194.1G173.2	N/A	Choren_v00_mik.OX359194.1G173	0	1226	0	2164	31	1596	20	117	0	168	684.2	380.2	MAL	1068873	#N/A
OX359194.1	MSTRG.6468	Choren_v00_mik.OX359194.1G173.2	N/A	Choren_v00_mik.OX359194.1G173	0	1226	0	2164	31	1596	20	117	0	168	684.2	380.2	MAL	1730608	#N/A
OX359194.1	MSTRG.6467	Choren_v00_mik.OX359194.1G175.1	N/A	Choren_v00_mik.OX359194.1G175	3575	2374	1965	2647	2040	2159	816	644	1796	1330	2520.2	1349	FEM	2944635	PSD10_HUMAN26S proteasome non-ATPase regulatory subunit 10 OS=Homo sapiens OX=9606 GN=PSMD10 PE=1 SV=1
OX359194.1	MSTRG.6474	Choren_v00_mik.OX359194.1G182.1	N/A	Choren_v00_mik.OX359194.1G182	76	67	12	57	77	69	31	4	66	12	57.8	36.4	FEM	2814774	#N/A
OX359194.1	MSTRG.6518	Choren_v00_mik.OX359194.1G210.1	N/A	Choren_v00_mik.OX359194.1G210	24652	7808	9436	5485	14641	4484	2682	13661	8734	13957	12404.4	8703.6	MAL	3387900	#N/A
OX359194.1	MSTRG.6524	Choren_v00_mik.OX359194.1G216.1	N/A	Choren_v00_mik.OX359194.1G216	48	391	423	346	429	760	244	87	410	157	327.4	331.6	FEM	5750367	#N/A
OX359194.1	MSTRG.6524	Choren_v00_mik.OX359194.1G216.2	N/A	Choren_v00_mik.OX359194.1G216	184	0	75	11	0	3	0	7	25	26	54	12.2	FEM	5750367	#N/A
OX359194.1	MSTRG.6509	Choren_v00_mik.OX359194.1G221.1	N/A	Choren_v00_mik.OX359194.1G221	8214948	1234003	2648228	1856215	3092529	131	6372	3099	11090	3629	3.40918e+06	4864.2	FEM	2781289	#N/A
OX359194.1	MSTRG.6593	Choren_v00_mik.OX359194.1G308.1	N/A	Choren_v00_mik.OX359194.1G308	70351	13191	25201	14567	16400	9133	5773	4763	13584	12232	27942	9097	FEM	3533486	#N/A
OX359194.1	MSTRG.6592	Choren_v00_mik.OX359194.1G309.1	N/A	Choren_v00_mik.OX359194.1G309	632	129	141	119	124	111	49	0	198	60	229	83.6	MAL	2113179	#N/A
OX359194.1	MSTRG.6595	Choren_v00_mik.OX359194.1G312.1	N/A	Choren_v00_mik.OX359194.1G312	14595	5167	22303	9742	6546	918	941	5196	3899	22249	11670.6	6640.6	FEM	6181130	#N/A
OX359194.1	MSTRG.6595	Choren_v00_mik.OX359194.1G312.2	N/A	Choren_v00_mik.OX359194.1G312	4298	4258	1902	9000	1092	482	691	3468	3749	16740	4110	5026	FEM	6181130	#N/A
OX359194.1	MSTRG.6648	Choren_v00_mik.OX359194.1G364.1	N/A	Choren_v00_mik.OX359194.1G364	205	560	225	354	3	187	116	3	138	249	269.4	138.6	MAL	3224797	#N/A
OX359194.1	MSTRG.6694	Choren_v00_mik.OX359194.1G417.1	N/A	Choren_v00_mik.OX359194.1G417	39967	2019	11844	867	10750	955	192	2677	19	293	13089.4	827.2	FEM	1875071	#N/A
OX359194.1	MSTRG.6699	Choren_v00_mik.OX359194.1G420.1	N/A	Choren_v00_mik.OX359194.1G420	22	13	10	4	6	6	3	19	17	18	11	12.6	FEM	1894494	#N/A
OX359194.1	MSTRG.6699	Choren_v00_mik.OX359194.1G420.1	N/A	Choren_v00_mik.OX359194.1G420	22	13	10	4	6	6	3	19	17	18	11	12.6	MAL	2349747	#N/A
OX359194.1	MSTRG.6699	Choren_v00_mik.OX359194.1G420.2	N/A	Choren_v00_mik.OX359194.1G420	10254	1677	2242	1940	2424	500	213	503	373	638	3707.4	445.4	FEM	1894494	#N/A
OX359194.1	MSTRG.6699	Choren_v00_mik.OX359194.1G420.2	N/A	Choren_v00_mik.OX359194.1G420	10254	1677	2242	1940	2424	500	213	503	373	638	3707.4	445.4	MAL	2349747	#N/A
OX359194.1	MSTRG.6703	Choren_v00_mik.OX359194.1G428.1	N/A	Choren_v00_mik.OX359194.1G428	5728	680	1364	1421	3156	1006	754	7282	6265	4638	2469.8	3989	MAL	2082436	ABCG2_PIGBroad substrate specificity ATP-binding cassette transporter ABCG2 OS=Sus scrofa OX=9823 GN=ABCG2 PE=2 SV=1
OX359194.1	MSTRG.6709	Choren_v00_mik.OX359194.1G437.1	N/A	Choren_v00_mik.OX359194.1G437	23314	5030	6527	6352	6354	4662	2268	12350	11181	13025	9515.4	8697.2	FEM	2393301	#N/A
OX359194.1	MSTRG.6722	Choren_v00_mik.OX359194.1G446.1	N/A	Choren_v00_mik.OX359194.1G446	0	0	0	0	0	0	0	0	0	0	0	0	MAL	1305016	#N/A
OX359194.1	MSTRG.6722	Choren_v00_mik.OX359194.1G446.1	N/A	Choren_v00_mik.OX359194.1G446	0	0	0	0	0	0	0	0	0	0	0	0	MAL	2272515	#N/A
OX359194.1	MSTRG.6722	Choren_v00_mik.OX359194.1G446.2	N/A	Choren_v00_mik.OX359194.1G446	0	0	0	0	0	0	0	0	0	2	0	0.4	MAL	1305016	#N/A
OX359194.1	MSTRG.6722	Choren_v00_mik.OX359194.1G446.2	N/A	Choren_v00_mik.OX359194.1G446	0	0	0	0	0	0	0	0	0	2	0	0.4	MAL	2272515	#N/A
OX359194.1	MSTRG.6722	Choren_v00_mik.OX359194.1G446.3	N/A	Choren_v00_mik.OX359194.1G446	9	0	0	0	27	0	0	0	0	0	7.2	0	MAL	1305016	#N/A
OX359194.1	MSTRG.6722	Choren_v00_mik.OX359194.1G446.3	N/A	Choren_v00_mik.OX359194.1G446	9	0	0	0	27	0	0	0	0	0	7.2	0	MAL	2272515	#N/A
OX359194.1	MSTRG.6722	Choren_v00_mik.OX359194.1G447.1	N/A	Choren_v00_mik.OX359194.1G447	11637	170	6176	4547	4686	80	2477	221	334	1157	5443.2	853.8	MAL	3382696	#N/A
OX359194.1	MSTRG.6719	Choren_v00_mik.OX359194.1G448.1	N/A	Choren_v00_mik.OX359194.1G448	12542	2106	2252	3170	2924	1164	368	987	1050	849	4598.8	883.6	MAL	3373867	#N/A
OX359194.1	MSTRG.6719	Choren_v00_mik.OX359194.1G448.2	N/A	Choren_v00_mik.OX359194.1G448	1482	240	512	854	566	283	142	111	30	745	730.8	262.2	MAL	3373867	#N/A
OX359194.1	Choren_v00_mik.OX359194.1G481	Choren_v00_mik.OX359194.1G481.1	N/A	Choren_v00_mik.OX359194.1G481	6	0	0	0	0	0	0	0	0	0	1.2	0	FEM	1712813	#N/A
OX359194.1	MSTRG.6799	Choren_v00_mik.OX359194.1G553.1	N/A	Choren_v00_mik.OX359194.1G553	0	0	0	0	0	0	0	0	0	0	0	0	FEM	1288609	#N/A
OX359194.1	MSTRG.6799	Choren_v00_mik.OX359194.1G553.2	N/A	Choren_v00_mik.OX359194.1G553	2149	0	0	0	0	220	5	418	446	627	429.8	343.2	FEM	1288609	PTPRQ_HUMANPhosphatidylinositol phosphatase PTPRQ OS=Homo sapiens OX=9606 GN=PTPRQ PE=1 SV=2
OX359194.1	MSTRG.6810	Choren_v00_mik.OX359194.1G562.1	N/A	Choren_v00_mik.OX359194.1G562	16804	3229	5541	4121	6809	2599	799	2152	5360	2732	7300.8	2728.4	FEM	2000342	#N/A
OX359194.1	MSTRG.6810	Choren_v00_mik.OX359194.1G562.1	N/A	Choren_v00_mik.OX359194.1G562	16804	3229	5541	4121	6809	2599	799	2152	5360	2732	7300.8	2728.4	FEM	2092913	#N/A
OX359194.1	MSTRG.6810	Choren_v00_mik.OX359194.1G562.2	N/A	Choren_v00_mik.OX359194.1G562	82	0	39	0	19	5	336	36	81	84	28	108.4	FEM	2000342	PR38A_HUMANPre-mRNA-splicing factor 38A OS=Homo sapiens OX=9606 GN=PRPF38A PE=1 SV=1
OX359194.1	MSTRG.6810	Choren_v00_mik.OX359194.1G562.2	N/A	Choren_v00_mik.OX359194.1G562	82	0	39	0	19	5	336	36	81	84	28	108.4	FEM	2092913	PR38A_HUMANPre-mRNA-splicing factor 38A OS=Homo sapiens OX=9606 GN=PRPF38A PE=1 SV=1
OX359194.1	MSTRG.6825	Choren_v00_mik.OX359194.1G578.1	N/A	Choren_v00_mik.OX359194.1G578	361	0	0	152	0	79	0	0	0	0	102.6	15.8	MAL	2887083	#N/A
OX359194.1	MSTRG.6845	Choren_v00_mik.OX359194.1G599.1	N/A	Choren_v00_mik.OX359194.1G599	1198	163	79	673	125	1316	232	566	321	497	447.6	586.4	MAL	1757399	#N/A
OX359194.1	MSTRG.6897	Choren_v00_mik.OX359194.1G637.1	N/A	Choren_v00_mik.OX359194.1G637	1	1	0	0	0	0	0	0	1	0	0.4	0.2	MAL	2199249	ECM29_MOUSEProteasome adapter and scaffold protein ECM29 OS=Mus musculus OX=10090 GN=Ecpas PE=1 SV=3
OX359194.1	MSTRG.6897	Choren_v00_mik.OX359194.1G637.1	N/A	Choren_v00_mik.OX359194.1G637	1	1	0	0	0	0	0	0	1	0	0.4	0.2	MAL	4269396	ECM29_MOUSEProteasome adapter and scaffold protein ECM29 OS=Mus musculus OX=10090 GN=Ecpas PE=1 SV=3
OX359194.1	MSTRG.6434	Choren_v00_mik.OX359194.1G66.1	N/A	Choren_v00_mik.OX359194.1G66	0	0	0	0	0	0	0	0	0	0	0	0	FEM	2147341	PTPRS_HUMANReceptor-type tyrosine-protein phosphatase S OS=Homo sapiens OX=9606 GN=PTPRS PE=1 SV=3
OX359194.1	MSTRG.6965	Choren_v00_mik.OX359194.1G681.1	N/A	Choren_v00_mik.OX359194.1G681	13913	6584	347	5773	9725	6047	2645	4182	3456	85	7268.4	3283	FEM	949223	#N/A
OX359194.1	MSTRG.6399	Choren_v00_mik.OX359194.1G75.1	N/A	Choren_v00_mik.OX359194.1G75	22555	5197	10364	3749	8919	4641	1680	2127	4306	4867	10156.8	3524.2	MAL	2471388	#N/A
OX359194.1	MSTRG.7075	Choren_v00_mik.OX359194.1G765.1	N/A	Choren_v00_mik.OX359194.1G765	28430	2522	6796	6630	8407	5446	430	0	3570	30	10557	1895.2	MAL	3021640	#N/A
OX359194.1	MSTRG.7076	Choren_v00_mik.OX359194.1G768.1	N/A	Choren_v00_mik.OX359194.1G768	1	0	18	0	0	0	0	0	0	0	3.8	0	MAL	3452611	PTPRS_CHICKReceptor-type tyrosine-protein phosphatase S OS=Gallus gallus OX=9031 GN=PTPRS PE=1 SV=3
OX359194.1	MSTRG.7076	Choren_v00_mik.OX359194.1G768.2	N/A	Choren_v00_mik.OX359194.1G768	0	640	0	0	0	0	2044	0	0	0	128	408.8	MAL	3452611	#N/A
OX359194.1	MSTRG.7057	Choren_v00_mik.OX359194.1G777.1	N/A	Choren_v00_mik.OX359194.1G777	1143	89	584	275	449	619	100	209	313	352	508	318.6	MAL	3472479	#N/A
OX359194.1	MSTRG.7060	Choren_v00_mik.OX359194.1G780.1	N/A	Choren_v00_mik.OX359194.1G780	478	49	18	417	167	0	39	755	31	237	225.8	212.4	MAL	5204819	-
OX359194.1	MSTRG.7063	Choren_v00_mik.OX359194.1G787.1	N/A	Choren_v00_mik.OX359194.1G787	0	0	0	54	0	0	65	0	80	0	10.8	29	MAL	1689436	FINC_HUMANFibronectin OS=Homo sapiens OX=9606 GN=FN1 PE=1 SV=5
OX359194.1	MSTRG.7106	Choren_v00_mik.OX359194.1G832.1	N/A	Choren_v00_mik.OX359194.1G832	66839	12023	19722	13513	18686	15990	4003	9785	21944	18129	26156.6	13970.2	MAL	693422	#N/A
OX359194.1	MSTRG.7116	Choren_v00_mik.OX359194.1G836.1	N/A	Choren_v00_mik.OX359194.1G836	20089	4251	5315	6718	5561	3562	1621	11303	7110	10562	8386.8	6831.6	FEM	2124606	MK15_HUMANMitogen-activated protein kinase 15 OS=Homo sapiens OX=9606 GN=MAPK15 PE=1 SV=1
OX359194.1	MSTRG.7138	Choren_v00_mik.OX359194.1G867.1	N/A	Choren_v00_mik.OX359194.1G867	7865	260	1609	662	1049	248	39	85	424	81	2289	175.4	MAL	2839263	IPO13_HUMANImportin-13 OS=Homo sapiens OX=9606 GN=IPO13 PE=1 SV=3
OX359194.1	MSTRG.7180	Choren_v00_mik.OX359194.1G913.1	N/A	Choren_v00_mik.OX359194.1G913	35754	8452	12730	9213	10012	8154	3210	5719	14378	10423	15232.2	8376.8	FEM	2447197	#N/A
OX359194.1	MSTRG.7180	Choren_v00_mik.OX359194.1G913.1	N/A	Choren_v00_mik.OX359194.1G913	35754	8452	12730	9213	10012	8154	3210	5719	14378	10423	15232.2	8376.8	MAL	3402135	#N/A
OX359194.1	MSTRG.7180	Choren_v00_mik.OX359194.1G913.2	N/A	Choren_v00_mik.OX359194.1G913	39	0	2	9	12	32	0	0	6	0	12.4	7.6	FEM	2447197	#N/A
OX359194.1	MSTRG.7180	Choren_v00_mik.OX359194.1G913.2	N/A	Choren_v00_mik.OX359194.1G913	39	0	2	9	12	32	0	0	6	0	12.4	7.6	MAL	3402135	#N/A
OX359194.1	MSTRG.7193	Choren_v00_mik.OX359194.1G925.1	N/A	Choren_v00_mik.OX359194.1G925	2473	415	2555	459	1160	0	33	4266	2433	5077	1412.4	2361.8	FEM	2300519	#N/A
OX359194.1	MSTRG.7203	Choren_v00_mik.OX359194.1G938.1	N/A	Choren_v00_mik.OX359194.1G938	249	121	70	705	138	676	0	320	264	380	256.6	328	MAL	5751349	#N/A
OX359194.1	MSTRG.7203	Choren_v00_mik.OX359194.1G938.2	N/A	Choren_v00_mik.OX359194.1G938	1456	358	645	321	1152	234	61	4428	1804	4807	786.4	2266.8	MAL	5751349	#N/A
OX359194.1	MSTRG.7203	Choren_v00_mik.OX359194.1G938.3	N/A	Choren_v00_mik.OX359194.1G938	1219	482	159	263	414	0	54	3885	1204	3995	507.4	1827.6	MAL	5751349	#N/A
OX359194.1	MSTRG.7203	Choren_v00_mik.OX359194.1G938.4	N/A	Choren_v00_mik.OX359194.1G938	5676	605	1706	975	954	760	609	13291	3198	11325	1983.2	5836.6	MAL	5751349	#N/A
OX359194.1	MSTRG.7203	Choren_v00_mik.OX359194.1G938.5	N/A	Choren_v00_mik.OX359194.1G938	31	0	75	230	72	178	0	21	126	180	81.6	101	MAL	5751349	#N/A
OX359194.1	MSTRG.7203	Choren_v00_mik.OX359194.1G938.6	N/A	Choren_v00_mik.OX359194.1G938	189	136	21	195	100	103	0	275	212	181	128.2	154.2	MAL	5751349	#N/A
OX359194.1	MSTRG.7208	Choren_v00_mik.OX359194.1G945.1	N/A	Choren_v00_mik.OX359194.1G945	9134	2390	3278	3020	2390	2039	875	20255	2775	16469	4042.4	8482.6	MAL	1777375	#N/A
OX359194.1	MSTRG.7216	Choren_v00_mik.OX359194.1G954.1	N/A	Choren_v00_mik.OX359194.1G954	10827	841	1721	7181	5927	5928	432	0	0	4223	5299.4	2116.6	MAL	1958190	LPLT2_CAEELLatrophilin-like protein LAT-2 OS=Caenorhabditis elegans OX=6239 GN=lat-2 PE=2 SV=1
OX359194.1	MSTRG.7216	Choren_v00_mik.OX359194.1G954.1	N/A	Choren_v00_mik.OX359194.1G954	10827	841	1721	7181	5927	5928	432	0	0	4223	5299.4	2116.6	MAL	2699027	LPLT2_CAEELLatrophilin-like protein LAT-2 OS=Caenorhabditis elegans OX=6239 GN=lat-2 PE=2 SV=1
OX359194.1	MSTRG.7216	Choren_v00_mik.OX359194.1G954.1	N/A	Choren_v00_mik.OX359194.1G954	10827	841	1721	7181	5927	5928	432	0	0	4223	5299.4	2116.6	MAL	2757007	LPLT2_CAEELLatrophilin-like protein LAT-2 OS=Caenorhabditis elegans OX=6239 GN=lat-2 PE=2 SV=1
OX359194.1	MSTRG.7216	Choren_v00_mik.OX359194.1G954.1	N/A	Choren_v00_mik.OX359194.1G954	10827	841	1721	7181	5927	5928	432	0	0	4223	5299.4	2116.6	MAL	3070419	LPLT2_CAEELLatrophilin-like protein LAT-2 OS=Caenorhabditis elegans OX=6239 GN=lat-2 PE=2 SV=1
OX359194.1	MSTRG.7256	Choren_v00_mik.OX359194.1G988.1	N/A	Choren_v00_mik.OX359194.1G988	33711	7711	12642	6237	11657	6836	2205	27933	16089	33176	14391.6	17247.8	MAL	3485760	EP15R_MOUSEEpidermal growth factor receptor substrate 15-like 1 OS=Mus musculus OX=10090 GN=Eps15l1 PE=1 SV=3
OX359194.1	MSTRG.7252	Choren_v00_mik.OX359194.1G990.1	N/A	Choren_v00_mik.OX359194.1G990	2	2	4	1	35	5	0	0	13	4	8.8	4.4	FEM	1157311	SZT2_MOUSEKICSTOR complex protein SZT2 OS=Mus musculus OX=10090 GN=Szt2 PE=1 SV=1
OX359194.1	MSTRG.7268	Choren_v00_mik.OX359194.1G993.1	N/A	Choren_v00_mik.OX359194.1G993	238	375	1158	1258	309	270	404	5969	2349	2133	667.6	2225	MAL	1967525	#N/A
OX359194.1	MSTRG.7271	Choren_v00_mik.OX359194.1G997.1	N/A	Choren_v00_mik.OX359194.1G997	54199	11797	14510	10618	13132	9364	4854	2669	7396	10337	20851.2	6924	MAL	1128757	VP13C_HUMANIntermembrane lipid transfer protein VPS13C OS=Homo sapiens OX=9606 GN=VPS13C PE=1 SV=1
OX359194.1	MSTRG.7271	Choren_v00_mik.OX359194.1G997.2	N/A	Choren_v00_mik.OX359194.1G997	208	8	5	2	0	66	0	1	5	3	44.6	15	MAL	1128757	#N/A
OX359194.1	MSTRG.7258	Choren_v00_mik.OX359194.1G998.1	N/A	Choren_v00_mik.OX359194.1G998	11	0	174	9	174	0	0	0	0	4	73.6	0.8	MAL	1393752	ANPRB_ANGJAAtrial natriuretic peptide receptor 2 OS=Anguilla japonica OX=7937 GN=npr2 PE=2 SV=1
OX359195.1	MSTRG.8382	Choren_v00_mik.OX359195.1G1107.1	N/A	Choren_v00_mik.OX359195.1G1107	13597	3250	4131	4057	4288	3241	927	1589	3117	2489	5864.6	2272.6	FEM	1976796	ADA_RATAdenosine deaminase OS=Rattus norvegicus OX=10116 GN=Ada PE=1 SV=3
OX359195.1	MSTRG.8437	Choren_v00_mik.OX359195.1G1174.1	N/A	Choren_v00_mik.OX359195.1G1174	413	1248	1839	1480	2125	1837	108	3425	3258	2481	1421	2221.8	MAL	1459023	#N/A
OX359195.1	MSTRG.8447	Choren_v00_mik.OX359195.1G1199.1	N/A	Choren_v00_mik.OX359195.1G1199	10	1	0	0	6	0	0	0	1	51	3.4	10.4	MAL	905987	#N/A
OX359195.1	MSTRG.8447	Choren_v00_mik.OX359195.1G1199.2	N/A	Choren_v00_mik.OX359195.1G1199	81	1	5	75	5	3	21	263	1	210	33.4	99.6	MAL	905987	#N/A
OX359195.1	MSTRG.7518	Choren_v00_mik.OX359195.1G143.1	N/A	Choren_v00_mik.OX359195.1G143	2660	684	830	620	514	789	18	2659	2016	2430	1061.6	1582.4	FEM	5664951	#N/A
OX359195.1	MSTRG.7529	Choren_v00_mik.OX359195.1G225.1	N/A	Choren_v00_mik.OX359195.1G225	9529	791	869	747	1303	1388	426	4336	6639	8934	2647.8	4344.6	MAL	3376900	MITOS_DANREMitochondrial potassium channel ATP-binding subunit OS=Danio rerio OX=7955 GN=abcb8 PE=2 SV=2
OX359195.1	MSTRG.7529	Choren_v00_mik.OX359195.1G225.3	N/A	Choren_v00_mik.OX359195.1G225	2	46	143	120	40	19	63	230	152	1	70.2	93	MAL	3376900	#N/A
OX359195.1	MSTRG.7542	Choren_v00_mik.OX359195.1G238.1	N/A	Choren_v00_mik.OX359195.1G238	7482	1269	1943	1235	0	1231	0	522	0	1167	2385.8	584	MAL	4972686	#N/A
OX359195.1	MSTRG.7542	Choren_v00_mik.OX359195.1G238.2	N/A	Choren_v00_mik.OX359195.1G238	463	186	163	0	162	0	4	13	751	585	194.8	270.6	MAL	4972686	#N/A
OX359195.1	MSTRG.7657	Choren_v00_mik.OX359195.1G314.1	N/A	Choren_v00_mik.OX359195.1G314	0	121	0	13	0	21	0	0	0	0	26.8	4.2	MAL	2340938	#N/A
OX359195.1	MSTRG.7929	Choren_v00_mik.OX359195.1G327.1	N/A	Choren_v00_mik.OX359195.1G327	14	0	0	0	0	0	0	0	0	0	2.8	0	FEM	1638790	#N/A
OX359195.1	MSTRG.7929	Choren_v00_mik.OX359195.1G327.1	N/A	Choren_v00_mik.OX359195.1G327	14	0	0	0	0	0	0	0	0	0	2.8	0	FEM	2355471	#N/A
OX359195.1	Choren_v00_mik.OX359195.1G520	Choren_v00_mik.OX359195.1G520.1	N/A	Choren_v00_mik.OX359195.1G520	0	0	0	0	0	0	0	0	0	0	0	0	MAL	5719360	-
OX359195.1	MSTRG.7801	Choren_v00_mik.OX359195.1G583.1	N/A	Choren_v00_mik.OX359195.1G583	373	288	174	97	129	282	55	127	121	0	212.2	117	FEM	1998826	#N/A
OX359195.1	MSTRG.7804	Choren_v00_mik.OX359195.1G585.1	N/A	Choren_v00_mik.OX359195.1G585	3837	220	999	1128	875	538	45	438	668	615	1411.8	460.8	FEM	2346961	CHSTB_HUMANCarbohydrate sulfotransferase 11 OS=Homo sapiens OX=9606 GN=CHST11 PE=1 SV=1
OX359195.1	MSTRG.7802	Choren_v00_mik.OX359195.1G591.1	N/A	Choren_v00_mik.OX359195.1G591.1	1214	225	121	262	219	203	128	113	187	482	408.2	222.6	MAL	1700718	#N/A
OX359195.1	MSTRG.7820	Choren_v00_mik.OX359195.1G605.1	N/A	Choren_v00_mik.OX359195.1G605	7531	802	3501	1571	684	651	173	1451	3840	4794	2817.8	2181.8	FEM	3025115	#N/A
OX359195.1	MSTRG.7844	Choren_v00_mik.OX359195.1G629.1	N/A	Choren_v00_mik.OX359195.1G629	13185	3031	4024	3956	3921	4468	765	3782	825	1656	5623.4	2299.2	MAL	3440941	#N/A
OX359195.1	MSTRG.7844	Choren_v00_mik.OX359195.1G629.2	N/A	Choren_v00_mik.OX359195.1G629	459	101	132	124	591	83	65	183	1761	1563	281.4	731	MAL	3440941	#N/A
OX359195.1	MSTRG.7891	Choren_v00_mik.OX359195.1G664.1	N/A	Choren_v00_mik.OX359195.1G664	595	433	139	260	296	1599	1528	32638	21406	27658	344.6	16965.8	FEM	2118198	#N/A
OX359195.1	MSTRG.7910	Choren_v00_mik.OX359195.1G689.1	N/A	Choren_v00_mik.OX359195.1G689	11687	3250	4975	3508	4073	2682	1401	990	3765	2297	5498.6	2227	MAL	2225876	#N/A
OX359195.1	MSTRG.7457	Choren_v00_mik.OX359195.1G70.1	N/A	Choren_v00_mik.OX359195.1G70	6392	1229	1350	392	1888	2872	49	275	482	373	2250.2	810.2	MAL	4785721	FAT4_MOUSEProtocadherin Fat 4 OS=Mus musculus OX=10090 GN=Fat4 PE=1 SV=2
OX359195.1	Choren_v00_mik.OX359195.1G732	Choren_v00_mik.OX359195.1G732.1	N/A	Choren_v00_mik.OX359195.1G732	27	6	0	3	9	5	13	0	0	26	9	8.8	MAL	255307	#N/A
OX359195.1	MSTRG.8074	Choren_v00_mik.OX359195.1G756.1	N/A	Choren_v00_mik.OX359195.1G756	7424	1163	2162	1659	1558	569	125	168	607	380	2793.2	369.8	MAL	2070479	TMED5_RATTransmembrane emp24 domain-containing protein 5 OS=Rattus norvegicus OX=10116 GN=Tmed5 PE=2 SV=1
OX359195.1	MSTRG.8078	Choren_v00_mik.OX359195.1G759.1	N/A	Choren_v00_mik.OX359195.1G759	507	303	1345	364	570	164	28	713	790	539	617.8	446.8	MAL	3338550	#N/A
OX359195.1	MSTRG.8078	Choren_v00_mik.OX359195.1G759.1	N/A	Choren_v00_mik.OX359195.1G759	507	303	1345	364	570	164	28	713	790	539	617.8	446.8	MAL	3389010	#N/A
OX359195.1	MSTRG.8078	Choren_v00_mik.OX359195.1G759.1	N/A	Choren_v00_mik.OX359195.1G759	507	303	1345	364	570	164	28	713	790	539	617.8	446.8	MAL	3415272	#N/A
OX359195.1	MSTRG.8086	Choren_v00_mik.OX359195.1G763.1	N/A	Choren_v00_mik.OX359195.1G763	1830	567	1215	587	499	374	164	922	1090	1044	939.6	718.8	MAL	2354116	#N/A
OX359195.1	MSTRG.8094	Choren_v00_mik.OX359195.1G773.1	N/A	Choren_v00_mik.OX359195.1G773	323	273	179	154	175	22	181	90	0	3	220.8	59.2	MAL	1688053	#N/A
OX359195.1	MSTRG.8159	Choren_v00_mik.OX359195.1G852.1	N/A	Choren_v00_mik.OX359195.1G852	56446	8975	17591	12431	15724	3805	1505	1463	4172	2656	22233.4	2720.2	MAL	2707659	#N/A
OX359195.1	MSTRG.8174	Choren_v00_mik.OX359195.1G859.1	N/A	Choren_v00_mik.OX359195.1G859	547	332	307	877	236	1519	13	1538	240	882	459.8	838.4	MAL	1656878	#N/A
OX359195.1	MSTRG.8174	Choren_v00_mik.OX359195.1G859.1	N/A	Choren_v00_mik.OX359195.1G859	547	332	307	877	236	1519	13	1538	240	882	459.8	838.4	MAL	1812075	#N/A
OX359195.1	MSTRG.8180	Choren_v00_mik.OX359195.1G863.1	N/A	Choren_v00_mik.OX359195.1G863	21348	3700	7107	4902	6826	4161	1310	2965	6917	5674	8776.6	4205.4	MAL	3380252	RHG18_HUMANRho GTPase-activating protein 18 OS=Homo sapiens OX=9606 GN=ARHGAP18 PE=1 SV=3
OX359195.1	MSTRG.8177	Choren_v00_mik.OX359195.1G868.1	N/A	Choren_v00_mik.OX359195.1G868	3	58	115	69	35	12	37	18	101	7	56	35	MAL	1656878	TRAF5_MOUSETNF receptor-associated factor 5 OS=Mus musculus OX=10090 GN=Traf5 PE=1 SV=1
OX359195.1	MSTRG.8191	Choren_v00_mik.OX359195.1G882.1	N/A	Choren_v00_mik.OX359195.1G882	10	11	43	25	0	0	0	13	0	0	17.8	2.6	FEM	2524547	ERGI2_MOUSEEndoplasmic reticulum-Golgi intermediate compartment protein 2 OS=Mus musculus OX=10090 GN=Ergic2 PE=1 SV=1
OX359195.1	MSTRG.8193	Choren_v00_mik.OX359195.1G890.1	N/A	Choren_v00_mik.OX359195.1G890	579	232	595	552	512	459	237	284	224	456	494	332	MAL	3315958	GTR8_MOUSESolute carrier family 2, facilitated glucose transporter member 8 OS=Mus musculus OX=10090 GN=Slc2a8 PE=1 SV=2
OX359195.1	MSTRG.8193	Choren_v00_mik.OX359195.1G890.1	N/A	Choren_v00_mik.OX359195.1G890	579	232	595	552	512	459	237	284	224	456	494	332	MAL	3481959	GTR8_MOUSESolute carrier family 2, facilitated glucose transporter member 8 OS=Mus musculus OX=10090 GN=Slc2a8 PE=1 SV=2
OX359195.1	MSTRG.8192	Choren_v00_mik.OX359195.1G892.1	N/A	Choren_v00_mik.OX359195.1G892	0	0	0	0	0	0	0	2320	6227	0	0	1709.4	FEM	6124706	P5CR1_BOVINPyrroline-5-carboxylate reductase 1, mitochondrial OS=Bos taurus OX=9913 GN=PYCR1 PE=2 SV=1
OX359195.1	MSTRG.8187	Choren_v00_mik.OX359195.1G893.1	N/A	Choren_v00_mik.OX359195.1G893	4232	609	941	165	206	224	58	575	304	444	1230.6	321	MAL	2631896	#N/A
OX359195.1	MSTRG.8187	Choren_v00_mik.OX359195.1G893.2	N/A	Choren_v00_mik.OX359195.1G893	614	496	607	475	345	476	229	9	344	217	507.4	255	MAL	2631896	#N/A
OX359195.1	MSTRG.8196	Choren_v00_mik.OX359195.1G894.1	N/A	Choren_v00_mik.OX359195.1G894	10090	4129	6750	1865	4912	3082	1875	1308	1862	2926	5549.2	2210.6	FEM	2011847	SRCR1_PATPEScavenger receptor cysteine-rich domain superfamily protein OS=Patiria pectinifera OX=7594 GN=SRCR1 PE=1 SV=1
OX359195.1	MSTRG.8196	Choren_v00_mik.OX359195.1G894.1	N/A	Choren_v00_mik.OX359195.1G894	10090	4129	6750	1865	4912	3082	1875	1308	1862	2926	5549.2	2210.6	MAL	2763178	SRCR1_PATPEScavenger receptor cysteine-rich domain superfamily protein OS=Patiria pectinifera OX=7594 GN=SRCR1 PE=1 SV=1
OX359195.1	MSTRG.8269	Choren_v00_mik.OX359195.1G986.1	N/A	Choren_v00_mik.OX359195.1G986	37	43	211	102	0	81	0	0	0	0	78.6	16.2	MAL	1695279	TRAF5_HUMANTNF receptor-associated factor 5 OS=Homo sapiens OX=9606 GN=TRAF5 PE=1 SV=2
OX359195.1	MSTRG.8281	Choren_v00_mik.OX359195.1G997.1	N/A	Choren_v00_mik.OX359195.1G997	244	0	0	0	96	107	0	0	0	69	68	35.2	MAL	245493	#N/A
OX359195.1	MSTRG.8281	Choren_v00_mik.OX359195.1G997.2	N/A	Choren_v00_mik.OX359195.1G997	511	102	0	55	0	0	0	556	187	0	133.6	148.6	MAL	245493	#N/A
OX359196.1	MSTRG.8607	Choren_v00_mik.OX359196.1G108.1	N/A	Choren_v00_mik.OX359196.1G108	6488	57	273	667	472	78	81	1602	0	328	1591.4	417.8	MAL	3570037	#N/A
OX359196.1	MSTRG.9524	Choren_v00_mik.OX359196.1G1104.1	N/A	Choren_v00_mik.OX359196.1G1104	1	0	2	1	1	5	0	17	5	4	1	6.2	MAL	1820598	#N/A
OX359196.1	MSTRG.9521	Choren_v00_mik.OX359196.1G1106.1	N/A	Choren_v00_mik.OX359196.1G1106	45293	9443	12903	3757	9929	6311	989	2460	4761	6835	16265	4271.2	MAL	1594506	#N/A
OX359196.1	MSTRG.9528	Choren_v00_mik.OX359196.1G1111.1	N/A	Choren_v00_mik.OX359196.1G1111	62636	19397	28866	16862	18413	14115	3190	17274	11986	22408	29234.8	13794.6	MAL	1910042	#N/A
OX359196.1	MSTRG.8641	Choren_v00_mik.OX359196.1G145.1	N/A	Choren_v00_mik.OX359196.1G145	242	109	93	50	59	45	35	40	25	36	110.6	36.2	MAL	3393529	#N/A
OX359196.1	MSTRG.8727	Choren_v00_mik.OX359196.1G242.1	N/A	Choren_v00_mik.OX359196.1G242	357	8818	0	6032	5877	0	0	12608	26721	0	4216.8	7865.8	MAL	710643	#N/A
OX359196.1	MSTRG.8727	Choren_v00_mik.OX359196.1G242.2	N/A	Choren_v00_mik.OX359196.1G242	44499	12164	30877	16960	9192	7369	2925	66844	50531	85505	22738.4	42634.8	MAL	710643	#N/A
OX359196.1	MSTRG.8727	Choren_v00_mik.OX359196.1G242.3	N/A	Choren_v00_mik.OX359196.1G242	49	0	0	0	9205	15077	6401	629	26042	11132	1850.8	11856.2	MAL	710643	#N/A
OX359196.1	MSTRG.8732	Choren_v00_mik.OX359196.1G244.1	N/A	Choren_v00_mik.OX359196.1G244	1397	495	175	21	1408	326	269	16	63	1212	699.2	377.2	MAL	1401211	#N/A
OX359196.1	MSTRG.8732	Choren_v00_mik.OX359196.1G244.1	N/A	Choren_v00_mik.OX359196.1G244	1397	495	175	21	1408	326	269	16	63	1212	699.2	377.2	MAL	1864351	#N/A
OX359196.1	MSTRG.8736	Choren_v00_mik.OX359196.1G250.1	N/A	Choren_v00_mik.OX359196.1G250	310	0	11	0	0	0	31	0	0	12	64.2	8.6	MAL	1048082	#N/A
OX359196.1	MSTRG.8759	Choren_v00_mik.OX359196.1G268.1	N/A	Choren_v00_mik.OX359196.1G268	452	193	1699	130	678	1164	62	195	255	483	630.4	431.8	MAL	2120827	#N/A
OX359196.1	MSTRG.8769	Choren_v00_mik.OX359196.1G275.1	N/A	Choren_v00_mik.OX359196.1G275	6622	474	2006	1426	1620	1284	265	11085	7909	9921	2429.6	6092.8	MAL	3368643	KIF27_MOUSEKinesin-like protein KIF27 OS=Mus musculus OX=10090 GN=Kif27 PE=1 SV=1
OX359196.1	MSTRG.8926	Choren_v00_mik.OX359196.1G445.1	N/A	Choren_v00_mik.OX359196.1G445	765	235	170	152	529	33	626	5848	414	306	370.2	1445.4	FEM	6194504	#N/A
OX359196.1	MSTRG.8965	Choren_v00_mik.OX359196.1G474.1	N/A	Choren_v00_mik.OX359196.1G474.1	0	6	18	7	0	5	0	0	3	0	6.2	1.6	MAL	5616104	#N/A
OX359196.1	MSTRG.8966	Choren_v00_mik.OX359196.1G475.1	N/A	Choren_v00_mik.OX359196.1G475	54	24	7	31	3	17	0	0	7	0	23.8	4.8	MAL	1566509	#N/A
OX359196.1	MSTRG.8966	Choren_v00_mik.OX359196.1G475.1	N/A	Choren_v00_mik.OX359196.1G475	54	24	7	31	3	17	0	0	7	0	23.8	4.8	MAL	3178232	#N/A
OX359196.1	MSTRG.8969	Choren_v00_mik.OX359196.1G484.1	N/A	Choren_v00_mik.OX359196.1G484	186	2	10	0	0	0	0	0	0	0	39.6	0	MAL	3378774	#N/A
OX359196.1	MSTRG.8969	Choren_v00_mik.OX359196.1G487.1	N/A	Choren_v00_mik.OX359196.1G487	13721	0	1669	4853	10765	2735	1676	5018	3734	6016	6201.6	3835.8	MAL	3350410	#N/A
OX359196.1	MSTRG.9120	Choren_v00_mik.OX359196.1G644.1	N/A	Choren_v00_mik.OX359196.1G644	10957	2001	4588	3343	3676	1115	432	558	1137	1079	4913	864.2	FEM	2118089	#N/A
OX359196.1	MSTRG.9126	Choren_v00_mik.OX359196.1G664.1	N/A	Choren_v00_mik.OX359196.1G664	20563	2292	2712	7294	8887	1346	1403	1130	737	634	8349.6	1050	MAL	3370809	#N/A
OX359196.1	MSTRG.9126	Choren_v00_mik.OX359196.1G664.1	N/A	Choren_v00_mik.OX359196.1G664	20563	2292	2712	7294	8887	1346	1403	1130	737	634	8349.6	1050	MAL	3684200	#N/A
OX359196.1	MSTRG.9126	Choren_v00_mik.OX359196.1G665.1	N/A	Choren_v00_mik.OX359196.1G665	1581	113	122	458	262	119	32	151	603	730	507.2	327	MAL	3635993	#N/A
OX359196.1	MSTRG.9143	Choren_v00_mik.OX359196.1G680.1	N/A	Choren_v00_mik.OX359196.1G680	12256	1662	2615	1975	3398	2284	1364	57514	38537	64872	4381.2	32914.2	MAL	1775462	#N/A
OX359196.1	MSTRG.9293	Choren_v00_mik.OX359196.1G785.1	N/A	Choren_v00_mik.OX359196.1G785	7142	2183	6614	5742	8010	4961	1664	2381	2591	6065	5938.2	3532.4	MAL	3879093	#N/A
OX359196.1	MSTRG.9310	Choren_v00_mik.OX359196.1G796.1	N/A	Choren_v00_mik.OX359196.1G796	15237	5001	6192	5905	5390	3840	1795	883	5260	401	7545	2435.8	FEM	1746627	#N/A
OX359196.1	MSTRG.9302	Choren_v00_mik.OX359196.1G804.1	N/A	Choren_v00_mik.OX359196.1G804	15200	1917	2061	3131	3159	2247	1968	79188	42104	63759	5093.6	37853.2	MAL	2792920	#N/A
OX359196.1	MSTRG.9281	Choren_v00_mik.OX359196.1G881.1	N/A	Choren_v00_mik.OX359196.1G881	3049	580	252	813	971	733	346	172	420	548	1133	443.8	MAL	3177963	HIPL2_MOUSEHHIP-like protein 2 OS=Mus musculus OX=10090 GN=Hhipl2 PE=2 SV=2
OX359196.1	MSTRG.9368	Choren_v00_mik.OX359196.1G945.1	N/A	Choren_v00_mik.OX359196.1G945	9751	2406	3256	3449	3233	1598	1020	1257	2396	2375	4419	1729.2	MAL	2410062	YIPF2_RATProtein YIPF2 OS=Rattus norvegicus OX=10116 GN=Yipf2 PE=2 SV=1
OX359197.1	MSTRG.10565	Choren_v00_mik.OX359197.1G1054.1	N/A	Choren_v00_mik.OX359197.1G1054	20585	10239	11041	11456	5965	6725	1650	1837	3769	4143	11857.2	3624.8	MAL	1984071	SRK4_SPOLATyrosine-protein kinase isoform SRK4 OS=Spongilla lacustris OX=6055 GN=SRK1 PE=2 SV=1
OX359197.1	MSTRG.10565	Choren_v00_mik.OX359197.1G1054.2	N/A	Choren_v00_mik.OX359197.1G1054	688	463	204	158	2536	150	494	25	84	1283	809.8	407.2	MAL	1984071	#N/A
OX359197.1	MSTRG.10560	Choren_v00_mik.OX359197.1G1069.1	N/A	Choren_v00_mik.OX359197.1G1069	3863	1920	2217	2575	2318	5666	2389	558	3918	2551	2578.6	3016.4	FEM	3770372	#N/A
OX359197.1	MSTRG.10630	Choren_v00_mik.OX359197.1G1132.1	N/A	Choren_v00_mik.OX359197.1G1132	3915	2064	2016	2228	1237	1316	623	417	1108	2070	2292	1106.8	MAL	1580001	CAR11_HUMANCaspase recruitment domain-containing protein 11 OS=Homo sapiens OX=9606 GN=CARD11 PE=1 SV=3
OX359197.1	MSTRG.9790	Choren_v00_mik.OX359197.1G133.1	N/A	Choren_v00_mik.OX359197.1G133	37734	7508	13276	6131	10653	8354	2287	5422	4235	7047	15060.4	5469	MAL	2075478	#N/A
OX359197.1	MSTRG.9807	Choren_v00_mik.OX359197.1G165.1	N/A	Choren_v00_mik.OX359197.1G165	4920	118	1550	354	936	406	112	58	354	441	1575.6	274.2	MAL	2202751	#N/A
OX359197.1	MSTRG.9807	Choren_v00_mik.OX359197.1G165.2	N/A	Choren_v00_mik.OX359197.1G165	95	461	130	539	36	8	35	31	177	129	252.2	76	MAL	2202751	#N/A
OX359197.1	MSTRG.9840	Choren_v00_mik.OX359197.1G215.1	N/A	Choren_v00_mik.OX359197.1G215	1412	539	812	465	556	652	155	805	1098	1136	756.8	769.2	MAL	3416560	#N/A
OX359197.1	MSTRG.9978	Choren_v00_mik.OX359197.1G359.1	N/A	Choren_v00_mik.OX359197.1G359	0	0	0	1442	0	69	0	0	0	0	288.4	13.8	MAL	1204029	#N/A
OX359197.1	MSTRG.10002	Choren_v00_mik.OX359197.1G385.1	N/A	Choren_v00_mik.OX359197.1G385	1159	362	419	336	522	298	122	167	456	290	559.6	266.6	MAL	1645713	LRMDA_MOUSELeucine-rich melanocyte differentiation-associated protein OS=Mus musculus OX=10090 GN=Lrmda PE=1 SV=1
OX359197.1	MSTRG.10054	Choren_v00_mik.OX359197.1G443.1	N/A	Choren_v00_mik.OX359197.1G443	9	2	1	0	2	0	3	1	0	0	2.8	0.8	FEM	5190035	#N/A
OX359197.1	MSTRG.10136	Choren_v00_mik.OX359197.1G532.1	N/A	Choren_v00_mik.OX359197.1G532	340	149	86	146	153	109	82	14	90	135	174.8	86	MAL	1580482	#N/A
OX359197.1	MSTRG.10123	Choren_v00_mik.OX359197.1G565.1	N/A	Choren_v00_mik.OX359197.1G565	14135	3881	4977	4335	4918	3531	1397	6699	6382	7471	6449.2	5096	MAL	1526096	#N/A
OX359197.1	MSTRG.10202	Choren_v00_mik.OX359197.1G622.1	N/A	Choren_v00_mik.OX359197.1G622	8291	1535	2729	2350	2204	1695	925	624	558	2124	3421.8	1185.2	MAL	2506233	#N/A
OX359197.1	MSTRG.10202	Choren_v00_mik.OX359197.1G622.1	N/A	Choren_v00_mik.OX359197.1G622	8291	1535	2729	2350	2204	1695	925	624	558	2124	3421.8	1185.2	MAL	2906701	#N/A
OX359197.1	MSTRG.10209	Choren_v00_mik.OX359197.1G631.1	N/A	Choren_v00_mik.OX359197.1G631	972	32	723	1505	2465	430	69	36	30	19	1139.4	116.8	MAL	3561854	#N/A
OX359197.1	MSTRG.10229	Choren_v00_mik.OX359197.1G644.2	N/A	Choren_v00_mik.OX359197.1G644	390	120	283	310	297	98	72	404	139	175	280	177.6	MAL	3362474	#N/A
OX359197.1	MSTRG.10231	Choren_v00_mik.OX359197.1G648.1	N/A	Choren_v00_mik.OX359197.1G648	1099	821	236	37	162	241	159	176	1419	249	471	448.8	MAL	3362474	F172A_MOUSECotranscriptional regulator FAM172A OS=Mus musculus OX=10090 GN=Fam172a PE=1 SV=2
OX359197.1	MSTRG.10229	Choren_v00_mik.OX359197.1G650.1	N/A	Choren_v00_mik.OX359197.1G650	0	0	354	14	499	1	0	120	589	7	173.4	143.4	MAL	1418583	RRP15_HUMANRRP15-like protein OS=Homo sapiens OX=9606 GN=RRP15 PE=1 SV=2
OX359197.1	MSTRG.10229	Choren_v00_mik.OX359197.1G650.1	N/A	Choren_v00_mik.OX359197.1G650	0	0	354	14	499	1	0	120	589	7	173.4	143.4	MAL	1492035	RRP15_HUMANRRP15-like protein OS=Homo sapiens OX=9606 GN=RRP15 PE=1 SV=2
OX359197.1	MSTRG.10229	Choren_v00_mik.OX359197.1G650.1	N/A	Choren_v00_mik.OX359197.1G650	0	0	354	14	499	1	0	120	589	7	173.4	143.4	MAL	1674806	RRP15_HUMANRRP15-like protein OS=Homo sapiens OX=9606 GN=RRP15 PE=1 SV=2
OX359197.1	MSTRG.10229	Choren_v00_mik.OX359197.1G650.1	N/A	Choren_v00_mik.OX359197.1G650	0	0	354	14	499	1	0	120	589	7	173.4	143.4	MAL	1750477	RRP15_HUMANRRP15-like protein OS=Homo sapiens OX=9606 GN=RRP15 PE=1 SV=2
OX359197.1	MSTRG.10229	Choren_v00_mik.OX359197.1G650.1	N/A	Choren_v00_mik.OX359197.1G650	0	0	354	14	499	1	0	120	589	7	173.4	143.4	MAL	2337054	RRP15_HUMANRRP15-like protein OS=Homo sapiens OX=9606 GN=RRP15 PE=1 SV=2
OX359197.1	MSTRG.10229	Choren_v00_mik.OX359197.1G650.1	N/A	Choren_v00_mik.OX359197.1G650	0	0	354	14	499	1	0	120	589	7	173.4	143.4	MAL	2619615	RRP15_HUMANRRP15-like protein OS=Homo sapiens OX=9606 GN=RRP15 PE=1 SV=2
OX359197.1	MSTRG.10229	Choren_v00_mik.OX359197.1G650.1	N/A	Choren_v00_mik.OX359197.1G650	0	0	354	14	499	1	0	120	589	7	173.4	143.4	MAL	2887730	RRP15_HUMANRRP15-like protein OS=Homo sapiens OX=9606 GN=RRP15 PE=1 SV=2
OX359197.1	MSTRG.10229	Choren_v00_mik.OX359197.1G650.1	N/A	Choren_v00_mik.OX359197.1G650	0	0	354	14	499	1	0	120	589	7	173.4	143.4	MAL	4095517	RRP15_HUMANRRP15-like protein OS=Homo sapiens OX=9606 GN=RRP15 PE=1 SV=2
OX359197.1	MSTRG.10229	Choren_v00_mik.OX359197.1G650.2	N/A	Choren_v00_mik.OX359197.1G650	532	181	96	161	495	87	0	79	59	231	293	91.2	MAL	1418583	#N/A
OX359197.1	MSTRG.10229	Choren_v00_mik.OX359197.1G650.2	N/A	Choren_v00_mik.OX359197.1G650	532	181	96	161	495	87	0	79	59	231	293	91.2	MAL	1492035	#N/A
OX359197.1	MSTRG.10229	Choren_v00_mik.OX359197.1G650.2	N/A	Choren_v00_mik.OX359197.1G650	532	181	96	161	495	87	0	79	59	231	293	91.2	MAL	1674806	#N/A
OX359197.1	MSTRG.10229	Choren_v00_mik.OX359197.1G650.2	N/A	Choren_v00_mik.OX359197.1G650	532	181	96	161	495	87	0	79	59	231	293	91.2	MAL	1750477	#N/A
OX359197.1	MSTRG.10229	Choren_v00_mik.OX359197.1G650.2	N/A	Choren_v00_mik.OX359197.1G650	532	181	96	161	495	87	0	79	59	231	293	91.2	MAL	1873131	#N/A
OX359197.1	MSTRG.10229	Choren_v00_mik.OX359197.1G650.2	N/A	Choren_v00_mik.OX359197.1G650	532	181	96	161	495	87	0	79	59	231	293	91.2	MAL	2337054	#N/A
OX359197.1	MSTRG.10229	Choren_v00_mik.OX359197.1G650.2	N/A	Choren_v00_mik.OX359197.1G650	532	181	96	161	495	87	0	79	59	231	293	91.2	MAL	2619615	#N/A
OX359197.1	MSTRG.10229	Choren_v00_mik.OX359197.1G650.2	N/A	Choren_v00_mik.OX359197.1G650	532	181	96	161	495	87	0	79	59	231	293	91.2	MAL	2887730	#N/A
OX359197.1	MSTRG.10229	Choren_v00_mik.OX359197.1G650.2	N/A	Choren_v00_mik.OX359197.1G650	532	181	96	161	495	87	0	79	59	231	293	91.2	MAL	3140220	#N/A
OX359197.1	MSTRG.10229	Choren_v00_mik.OX359197.1G650.2	N/A	Choren_v00_mik.OX359197.1G650	532	181	96	161	495	87	0	79	59	231	293	91.2	MAL	4095517	#N/A
OX359197.1	MSTRG.10241	Choren_v00_mik.OX359197.1G657.1	N/A	Choren_v00_mik.OX359197.1G657	217	75	110	98	69	52	10	15	44	44	113.8	33	MAL	2998150	UN93A_XENLAProtein unc-93 homolog A OS=Xenopus laevis OX=8355 GN=unc93a PE=2 SV=1
OX359197.1	MSTRG.10251	Choren_v00_mik.OX359197.1G707.1	N/A	Choren_v00_mik.OX359197.1G707	459	0	1263	2720	3	2850	256	0	27	282	889	683	MAL	2649492	#N/A
OX359197.1	MSTRG.10256	Choren_v00_mik.OX359197.1G718.1	N/A	Choren_v00_mik.OX359197.1G718	22277	5471	9671	10269	9331	3936	2018	2270	3542	3460	11403.8	3045.2	MAL	878798	#N/A
OX359197.1	MSTRG.10256	Choren_v00_mik.OX359197.1G718.1	N/A	Choren_v00_mik.OX359197.1G718	22277	5471	9671	10269	9331	3936	2018	2270	3542	3460	11403.8	3045.2	MAL	1513421	#N/A
OX359197.1	MSTRG.10262	Choren_v00_mik.OX359197.1G724.1	N/A	Choren_v00_mik.OX359197.1G724	952	357	1334	261	209	1491	323	350	2103	765	622.6	1006.4	FEM	2344724	FREM2_LYTVAExtracellular matrix protein 3 OS=Lytechinus variegatus OX=7654 GN=ECM3 PE=1 SV=1
OX359197.1	MSTRG.10263	Choren_v00_mik.OX359197.1G725.1	N/A	Choren_v00_mik.OX359197.1G725	332	188	3122	70	67	65	9	118	158	40	755.8	78	MAL	2093990	FRAS1_MOUSEExtracellular matrix organizing protein FRAS1 OS=Mus musculus OX=10090 GN=Fras1 PE=1 SV=2
OX359197.1	MSTRG.10372	Choren_v00_mik.OX359197.1G793.1	N/A	Choren_v00_mik.OX359197.1G793	6873	2395	2805	3579	2640	3330	1536	19505	8946	18833	3658.4	10430	MAL	3171208	UGDH_HUMANUDP-glucose 6-dehydrogenase OS=Homo sapiens OX=9606 GN=UGDH PE=1 SV=1
OX359197.1	MSTRG.10383	Choren_v00_mik.OX359197.1G814.1	N/A	Choren_v00_mik.OX359197.1G814	1364	629	665	533	620	628	109	25490	5747	22711	762.2	10937	MAL	917521	#N/A
OX359197.1	MSTRG.10385	Choren_v00_mik.OX359197.1G816.1	N/A	Choren_v00_mik.OX359197.1G816	499	82	280	127	419	35	35	15451	1404	13867	281.4	6158.4	MAL	1601042	#N/A
OX359197.1	MSTRG.10387	Choren_v00_mik.OX359197.1G820.1	N/A	Choren_v00_mik.OX359197.1G820	340	983	306	862	852	1236	465	647	1262	135	668.6	749	MAL	1692541	#N/A
OX359197.1	MSTRG.10329	Choren_v00_mik.OX359197.1G846.1	N/A	Choren_v00_mik.OX359197.1G846	134	22	34	33	48	57	12	4	42	23	54.2	27.6	FEM	1944441	#N/A
OX359197.1	MSTRG.10329	Choren_v00_mik.OX359197.1G846.1	N/A	Choren_v00_mik.OX359197.1G846	134	22	34	33	48	57	12	4	42	23	54.2	27.6	MAL	5996085	#N/A
OX359197.1	MSTRG.10342	Choren_v00_mik.OX359197.1G865.1	N/A	Choren_v00_mik.OX359197.1G865	13800	903	773	1650	1774	1166	494	1464	847	1556	3780	1105.4	FEM	3156640	#N/A
OX359197.1	MSTRG.10342	Choren_v00_mik.OX359197.1G865.2	N/A	Choren_v00_mik.OX359197.1G865	1180	30	290	36	464	97	16	20	22	50	400	41	FEM	3156640	#N/A
OX359197.1	MSTRG.10358	Choren_v00_mik.OX359197.1G877.1	N/A	Choren_v00_mik.OX359197.1G877	194	862	60	43	6	7	0	57	0	184	233	49.6	MAL	1874183	#N/A
OX359197.1	MSTRG.10359	Choren_v00_mik.OX359197.1G878.1	N/A	Choren_v00_mik.OX359197.1G878	2841	2315	1150	1020	713	890	207	641	972	1093	1607.8	760.6	MAL	1874183	#N/A
OX359197.1	MSTRG.10449	Choren_v00_mik.OX359197.1G913.1	N/A	Choren_v00_mik.OX359197.1G913	276	81	501	66	234	156	129	15	83	115	231.6	99.6	MAL	2706276	SRCR1_PATPEScavenger receptor cysteine-rich domain superfamily protein OS=Patiria pectinifera OX=7594 GN=SRCR1 PE=1 SV=1
OX359197.1	MSTRG.10449	Choren_v00_mik.OX359197.1G913.2	N/A	Choren_v00_mik.OX359197.1G913	0	0	0	24	0	0	0	0	0	0	4.8	0	MAL	2706276	#N/A
OX359197.1	MSTRG.10497	Choren_v00_mik.OX359197.1G947.1	N/A	Choren_v00_mik.OX359197.1G947	3512	4189	3772	1525	2636	5224	1001	1183	379	4261	3126.8	2409.6	MAL	6035650	#N/A
OX359198.1	MSTRG.11496	Choren_v00_mik.OX359198.1G1024.1	N/A	Choren_v00_mik.OX359198.1G1024	97842	14596	33935	11054	30692	13393	1893	4851	18159	10015	37623.8	9662.2	MAL	3391113	NEB1_HUMANNeurabin-1 OS=Homo sapiens OX=9606 GN=PPP1R9A PE=1 SV=2
OX359198.1	MSTRG.10745	Choren_v00_mik.OX359198.1G110.1	N/A	Choren_v00_mik.OX359198.1G110	7	0	21	23	0	0	0	0	0	41	10.2	8.2	MAL	3180329	#N/A
OX359198.1	MSTRG.10745	Choren_v00_mik.OX359198.1G110.2	N/A	Choren_v00_mik.OX359198.1G110	138	53	210	98	83	28	3	81	121	0	116.4	46.6	MAL	3180329	#N/A
OX359198.1	MSTRG.10749	Choren_v00_mik.OX359198.1G131.1	N/A	Choren_v00_mik.OX359198.1G131	38902	8459	11709	7037	11161	7604	4060	79580	59143	84992	15453.6	47075.8	MAL	2668326	#N/A
OX359198.1	MSTRG.10750	Choren_v00_mik.OX359198.1G135.1	N/A	Choren_v00_mik.OX359198.1G135	114	50	24	95	82	58	14	15	9	37	73	26.6	FEM	5057529	GRHPR_HUMANGlyoxylate reductase/hydroxypyruvate reductase OS=Homo sapiens OX=9606 GN=GRHPR PE=1 SV=1
OX359198.1	MSTRG.10772	Choren_v00_mik.OX359198.1G165.1	N/A	Choren_v00_mik.OX359198.1G165	0	0	0	0	0	0	0	0	0	0	0	0	MAL	3247208	#N/A
OX359198.1	MSTRG.10772	Choren_v00_mik.OX359198.1G165.1	N/A	Choren_v00_mik.OX359198.1G165	0	0	0	0	0	0	0	0	0	0	0	0	MAL	3335996	#N/A
OX359198.1	MSTRG.10810	Choren_v00_mik.OX359198.1G269.1	N/A	Choren_v00_mik.OX359198.1G269	2	0	6	2	0	2	0	2	4	0	2	1.6	MAL	2814882	#N/A
OX359198.1	MSTRG.10845	Choren_v00_mik.OX359198.1G275.1	N/A	Choren_v00_mik.OX359198.1G275	0	0	0	0	0	0	0	0	0	0	0	0	MAL	2715119	UBP15_RATUbiquitin carboxyl-terminal hydrolase 15 OS=Rattus norvegicus OX=10116 GN=Usp15 PE=1 SV=1
OX359198.1	MSTRG.10845	Choren_v00_mik.OX359198.1G277.1	N/A	Choren_v00_mik.OX359198.1G277	8299	1651	670	2026	1186	538	265	151	926	291	2766.4	434.2	MAL	2065400	#N/A
OX359198.1	MSTRG.10845	Choren_v00_mik.OX359198.1G277.2	N/A	Choren_v00_mik.OX359198.1G277	3169	88	66	69	58	69	46	27	112	39	690	58.6	MAL	2065400	#N/A
OX359198.1	MSTRG.10861	Choren_v00_mik.OX359198.1G291.1	N/A	Choren_v00_mik.OX359198.1G291	773	75	236	451	30	253	101	165	212	280	313	202.2	FEM	4033708	#N/A
OX359198.1	MSTRG.10911	Choren_v00_mik.OX359198.1G364.1	N/A	Choren_v00_mik.OX359198.1G364	23689	7586	6526	6967	10887	9724	1763	8454	25473	7746	11131	10632	MAL	3054218	#N/A
OX359198.1	MSTRG.10911	Choren_v00_mik.OX359198.1G364.2	N/A	Choren_v00_mik.OX359198.1G364	25566	6304	7505	463	7288	6463	1907	8768	16669	7840	9425.2	8329.4	MAL	3054218	#N/A
OX359198.1	MSTRG.11001	Choren_v00_mik.OX359198.1G418.1	N/A	Choren_v00_mik.OX359198.1G418	30521	1225	10319	7703	10056	5885	2329	8338	7764	11026	11964.8	7068.4	MAL	2588934	#N/A
OX359198.1	MSTRG.11001	Choren_v00_mik.OX359198.1G418.2	N/A	Choren_v00_mik.OX359198.1G418	594	601	334	69	306	593	19	180	415	332	380.8	307.8	MAL	2588934	#N/A
OX359198.1	MSTRG.11066	Choren_v00_mik.OX359198.1G542.1	N/A	Choren_v00_mik.OX359198.1G542	195	0	7	37	16	4	0	26	0	42	51	14.4	FEM	3589591	#N/A
OX359198.1	MSTRG.11068	Choren_v00_mik.OX359198.1G544.1	N/A	Choren_v00_mik.OX359198.1G544	331	0	90	20	10	0	13	0	0	21	90.2	6.8	FEM	1714779	#N/A
OX359198.1	MSTRG.11081	Choren_v00_mik.OX359198.1G559.1	N/A	Choren_v00_mik.OX359198.1G559	315	0	101	19	34	3	0	10	31	13	93.8	11.4	MAL	2761062	#N/A
OX359198.1	MSTRG.11081	Choren_v00_mik.OX359198.1G559.2	N/A	Choren_v00_mik.OX359198.1G559	0	0	0	0	0	0	0	0	0	0	0	0	MAL	2761062	#N/A
OX359198.1	MSTRG.11114	Choren_v00_mik.OX359198.1G608.1	N/A	Choren_v00_mik.OX359198.1G608	0	38	1	6	11	0	15	0	0	7	11.2	4.4	MAL	3456916	#N/A
OX359198.1	MSTRG.11143	Choren_v00_mik.OX359198.1G627.1	N/A	Choren_v00_mik.OX359198.1G627	0	0	1	0	0	40	0	0	0	0	0.2	8	MAL	1489020	#N/A
OX359198.1	MSTRG.11143	Choren_v00_mik.OX359198.1G627.2	N/A	Choren_v00_mik.OX359198.1G627	66	187	169	102	444	99	32	105	0	0	193.6	47.2	MAL	1489020	#N/A
OX359198.1	MSTRG.11143	Choren_v00_mik.OX359198.1G627.3	N/A	Choren_v00_mik.OX359198.1G627	4885	231	778	196	456	1274	71	0	0	0	1309.2	269	MAL	1489020	#N/A
OX359198.1	MSTRG.11165	Choren_v00_mik.OX359198.1G652.1	N/A	Choren_v00_mik.OX359198.1G652	4725	1611	1672	1436	964	991	486	868	3571	1012	2081.6	1385.6	MAL	1308662	NLRP3_HUMANNACHT, LRR and PYD domains-containing protein 3 OS=Homo sapiens OX=9606 GN=NLRP3 PE=1 SV=3
OX359198.1	MSTRG.10708	Choren_v00_mik.OX359198.1G74.1	N/A	Choren_v00_mik.OX359198.1G74	5521	835	1330	3276	3103	284	301	247	641	3089	2813	912.4	MAL	4431359	MITF_MOUSEMicrophthalmia-associated transcription factor OS=Mus musculus OX=10090 GN=Mitf PE=1 SV=4
OX359198.1	MSTRG.10708	Choren_v00_mik.OX359198.1G74.2	N/A	Choren_v00_mik.OX359198.1G74	1864	95	391	625	427	105	434	82	53	809	680.4	296.6	MAL	4431359	MITF_MOUSEMicrophthalmia-associated transcription factor OS=Mus musculus OX=10090 GN=Mitf PE=1 SV=4
OX359198.1	MSTRG.11246	Choren_v00_mik.OX359198.1G754.1	N/A	Choren_v00_mik.OX359198.1G754	22283	4709	6027	6170	5637	2157	1407	2557	5603	3649	8965.2	3074.6	FEM	2635086	#N/A
OX359198.1	MSTRG.11270	Choren_v00_mik.OX359198.1G767.1	N/A	Choren_v00_mik.OX359198.1G767	643	0	1280	191	129	361	135	506	211	2483	448.6	739.2	FEM	1389499	FYV1_HUMAN1-phosphatidylinositol 3-phosphate 5-kinase OS=Homo sapiens OX=9606 GN=PIKFYVE PE=1 SV=3
OX359198.1	MSTRG.11270	Choren_v00_mik.OX359198.1G767.1	N/A	Choren_v00_mik.OX359198.1G767	643	0	1280	191	129	361	135	506	211	2483	448.6	739.2	FEM	1482260	FYV1_HUMAN1-phosphatidylinositol 3-phosphate 5-kinase OS=Homo sapiens OX=9606 GN=PIKFYVE PE=1 SV=3
OX359198.1	MSTRG.11270	Choren_v00_mik.OX359198.1G767.1	N/A	Choren_v00_mik.OX359198.1G767	643	0	1280	191	129	361	135	506	211	2483	448.6	739.2	MAL	1599595	FYV1_HUMAN1-phosphatidylinositol 3-phosphate 5-kinase OS=Homo sapiens OX=9606 GN=PIKFYVE PE=1 SV=3
OX359198.1	MSTRG.11270	Choren_v00_mik.OX359198.1G767.1	N/A	Choren_v00_mik.OX359198.1G767	643	0	1280	191	129	361	135	506	211	2483	448.6	739.2	MAL	4272881	FYV1_HUMAN1-phosphatidylinositol 3-phosphate 5-kinase OS=Homo sapiens OX=9606 GN=PIKFYVE PE=1 SV=3
OX359198.1	MSTRG.11270	Choren_v00_mik.OX359198.1G767.2	N/A	Choren_v00_mik.OX359198.1G767	728	0	1212	202	127	80	325	634	266	1691	453.8	599.2	FEM	1389499	#N/A
OX359198.1	MSTRG.11270	Choren_v00_mik.OX359198.1G767.2	N/A	Choren_v00_mik.OX359198.1G767	728	0	1212	202	127	80	325	634	266	1691	453.8	599.2	FEM	1482260	#N/A
OX359198.1	MSTRG.11270	Choren_v00_mik.OX359198.1G767.2	N/A	Choren_v00_mik.OX359198.1G767	728	0	1212	202	127	80	325	634	266	1691	453.8	599.2	MAL	1599595	#N/A
OX359198.1	MSTRG.11270	Choren_v00_mik.OX359198.1G767.2	N/A	Choren_v00_mik.OX359198.1G767	728	0	1212	202	127	80	325	634	266	1691	453.8	599.2	MAL	4272881	#N/A
OX359198.1	MSTRG.11273	Choren_v00_mik.OX359198.1G774.1	N/A	Choren_v00_mik.OX359198.1G774	12	3	12	12	7	2	0	4	44	2	9.2	10.4	MAL	6119093	-
OX359198.1	MSTRG.11316	Choren_v00_mik.OX359198.1G817.1	N/A	Choren_v00_mik.OX359198.1G817	6724	449	1021	804	987	2694	364	658	452	469	1997	927.4	MAL	1723212	#N/A
OX359198.1	MSTRG.11316	Choren_v00_mik.OX359198.1G817.1	N/A	Choren_v00_mik.OX359198.1G817	6724	449	1021	804	987	2694	364	658	452	469	1997	927.4	MAL	3360515	#N/A
OX359198.1	MSTRG.11317	Choren_v00_mik.OX359198.1G818.1	N/A	Choren_v00_mik.OX359198.1G818	10373	1108	3496	1071	11583	2971	662	2830	821	1095	5526.2	1675.8	MAL	1014321	L3BPB_DANREGalectin-3-binding protein B OS=Danio rerio OX=7955 GN=lgals3bpb PE=2 SV=1
OX359198.1	MSTRG.11334	Choren_v00_mik.OX359198.1G854.1	N/A	Choren_v00_mik.OX359198.1G854	14868	2337	4075	2665	4138	1148	731	5475	3807	4396	5616.6	3111.4	FEM	1103008	#N/A
OX359198.1	MSTRG.11388	Choren_v00_mik.OX359198.1G905.1	N/A	Choren_v00_mik.OX359198.1G905	20	1	5	10	6	5	0	0	7	2	8.4	2.8	FEM	2836991	UD3A1_BOVINUDP-glucuronosyltransferase 3A1 OS=Bos taurus OX=9913 GN=UGT3A1 PE=2 SV=1
OX359199.1	MSTRG.12443	Choren_v00_mik.OX359199.1G1008.1	N/A	Choren_v00_mik.OX359199.1G1008	1363	338	606	334	609	174	136	83	375	334	650	220.4	FEM	614124	#N/A
OX359199.1	MSTRG.12443	Choren_v00_mik.OX359199.1G1008.2	N/A	Choren_v00_mik.OX359199.1G1008	3749	785	1369	1355	1293	852	196	318	465	501	1710.2	466.4	FEM	614124	#N/A
OX359199.1	MSTRG.12445	Choren_v00_mik.OX359199.1G1009.1	N/A	Choren_v00_mik.OX359199.1G1009	35496	5895	8932	8200	12599	4001	2043	13518	8248	15890	14224.4	8740	MAL	4364880	#N/A
OX359199.1	MSTRG.12445	Choren_v00_mik.OX359199.1G1009.2	N/A	Choren_v00_mik.OX359199.1G1009	623	92	820	693	65	764	586	533	474	716	458.6	614.6	MAL	4364880	#N/A
OX359199.1	MSTRG.12492	Choren_v00_mik.OX359199.1G1068.1	N/A	Choren_v00_mik.OX359199.1G1068	533	442	110	125	268	310	67	18	349	88	295.6	166.4	MAL	1981829	#N/A
OX359199.1	MSTRG.12492	Choren_v00_mik.OX359199.1G1069.1	N/A	Choren_v00_mik.OX359199.1G1069	12720	6907	6522	2326	10192	7062	2459	24562	2010	26299	7733.4	12478.4	MAL	5986866	#N/A
OX359199.1	MSTRG.12513	Choren_v00_mik.OX359199.1G1083.1	N/A	Choren_v00_mik.OX359199.1G1083	3	5	0	2	0	16	1003	23068	17242	18022	2	11870.2	MAL	1118588	CTSRG_MACFACation channel sperm-associated auxiliary subunit gamma OS=Macaca fascicularis OX=9541 GN=CATSPERG PE=2 SV=1
OX359199.1	MSTRG.11540	Choren_v00_mik.OX359199.1G14.1	N/A	Choren_v00_mik.OX359199.1G14	2589	646	862	779	1153	904	356	1330	469	1398	1205.8	891.4	MAL	716469	SPT48_HUMANSpermatogenesis-associated protein 48 OS=Homo sapiens OX=9606 GN=SPATA48 PE=2 SV=2
OX359199.1	MSTRG.11540	Choren_v00_mik.OX359199.1G14.2	N/A	Choren_v00_mik.OX359199.1G14	152	22	0	17	0	0	0	0	118	40	38.2	31.6	MAL	716469	#N/A
OX359199.1	MSTRG.11729	Choren_v00_mik.OX359199.1G155.1	N/A	Choren_v00_mik.OX359199.1G155	5697	1121	1160	973	1217	1699	712	651	685	2691	2033.6	1287.6	FEM	2831309	#N/A
[truncated: 2,864 more rows]

## Sheet: C. Petrosia ficiformis
					Female (TPMs)			Male (TPMs)
[truncated: 2,189 more rows]

[truncated: 5 more sheets: D. Axinella damicornis, E. Phakellia ventilabrum, F. Halichondria panicea, G. Geodia barretti, I. Geodia hentscheli]
